# Supplementary material
Source: PubMed Central journal article supplement (PMC2938103)
Supplement: supp_M000116-MCP201_Saleem_Spectra.pdf [file supp_M000116-MCP201_Saleem_Spectra.pdf]

Annotated spectra from Saleem et. al. 2009

# Annotated spectra from Saleem et. al. 2009

K.AAADALS<sub>167</sub>DLEIKDSK.S/2

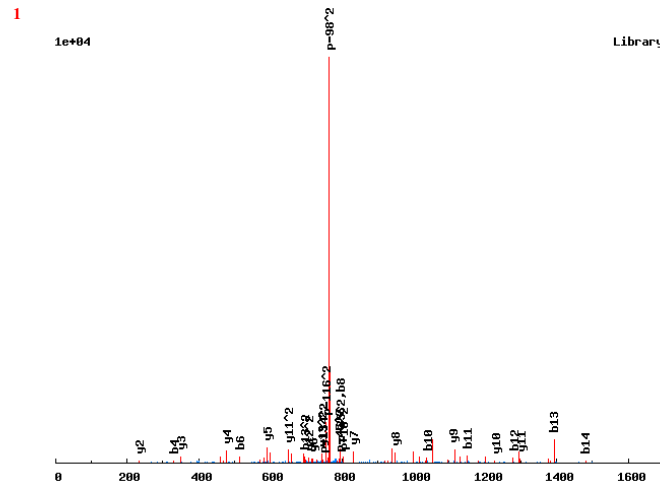

| Library | b <sup>1+</sup>  | b <sup>2+</sup> | #  | AA      | #  | y <sup>1+</sup>  | y <sup>2+</sup> |
|---------|------------------|-----------------|----|---------|----|------------------|-----------------|
|         | 72.0444          | 36.5258         | 1  | A       | 15 |                  |                 |
|         | 143.0815         | 72.0444         | 2  | A       | 14 | 1555.7251        | 778.3662        |
|         | 214.1186         | 107.5629        | 3  | A       | 13 | 1484.6880        | <b>742.8476</b> |
|         | <b>329.1456</b>  | 165.0764        | 4  | D       | 12 | 1413.6509        | <b>707.3291</b> |
|         | 400.1827         | 200.5950        | 5  | A       | 11 | <b>1298.6239</b> | <b>649.8156</b> |
|         | <b>513.2667</b>  | 257.1370        | 6  | L       | 10 | <b>1227.5868</b> | 614.2970        |
|         | 680.2651         | 340.6362        | 7  | S [167] | 9  | <b>1114.5027</b> | 557.7550        |
|         | <b>795.2920</b>  | 398.1497        | 8  | D       | 8  | <b>947.5044</b>  | 474.2558        |
|         | 908.3761         | 454.6917        | 9  | L       | 7  | <b>832.4774</b>  | 416.7424        |
|         | <b>1037.4187</b> | 519.2130        | 10 | E       | 6  | <b>719.3934</b>  | 360.2003        |
|         | <b>1150.5027</b> | 575.7550        | 11 | I       | 5  | <b>590.3508</b>  | 295.6790        |
|         | <b>1278.5977</b> | 639.8025        | 12 | K       | 4  | <b>477.2667</b>  | 239.1370        |
|         | <b>1393.6246</b> | <b>697.3160</b> | 13 | D       | 3  | <b>349.1718</b>  | 175.0895        |
|         | <b>1480.6567</b> | 740.8320        | 14 | S       | 2  | <b>234.1448</b>  | 117.5761        |
|         |                  |                 | 15 | K       | 1  | 147.1128         | 74.0600         |

# Annotated spectra from Saleem et. al. 2009

K.AAADALS<sub>167</sub>DLEIKDS<sub>167</sub>K.S/2

0.9875

1e+04

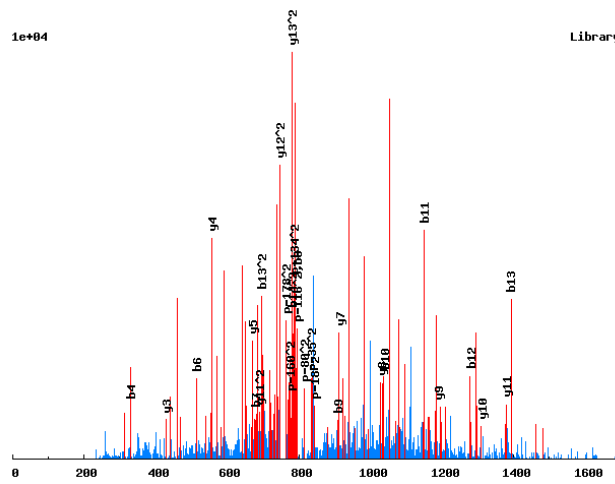

| Library | b <sup>1+</sup> | b <sup>2+</sup> | #  | AA     | #  | y <sup>1+</sup> | y <sup>2+</sup> |
|---------|-----------------|-----------------|----|--------|----|-----------------|-----------------|
|         | 72.0444         | 36.5258         | 1  | A      | 15 |                 |                 |
|         | 143.0815        | 72.0444         | 2  | A      | 14 | 1635.6914       | 818.3493        |
|         | 214.1186        | 107.5629        | 3  | A      | 13 | 1564.6543       | 782.8308        |
|         | 329.1456        | 165.0764        | 4  | D      | 12 | 1493.6172       | 747.3122        |
|         | 400.1827        | 200.5950        | 5  | A      | 11 | 1378.5902       | 689.7988        |
|         | 513.2667        | 257.1370        | 6  | L      | 10 | 1307.5531       | 654.2802        |
|         | 680.2651        | 340.6362        | 7  | S[167] | 9  | 1194.4691       | 597.7382        |
|         | 795.2920        | 398.1497        | 8  | D      | 8  | 1027.4707       | 514.2390        |
|         | 908.3761        | 454.6917        | 9  | L      | 7  | 912.4438        | 456.7255        |
|         | 1037.4187       | 519.2130        | 10 | E      | 6  | 799.3597        | 400.1835        |
|         | 1150.5027       | 575.7550        | 11 | I      | 5  | 670.3171        | 335.6622        |
|         | 1278.5977       | 639.8025        | 12 | K      | 4  | 557.2331        | 279.1202        |
|         | 1393.6246       | 697.3160        | 13 | D      | 3  | 429.1381        | 215.0727        |
|         | 1560.6230       | 780.8151        | 14 | S[167] | 2  | 314.1112        | 157.5592        |
|         |                 |                 | 15 | K      | 1  | 147.1128        | 74.0600         |

# Annotated spectra from Saleem et. al. 2009

R.AAAHQNYFNDS<sub>16</sub>DEDEDNIK.Q/3

0.9998

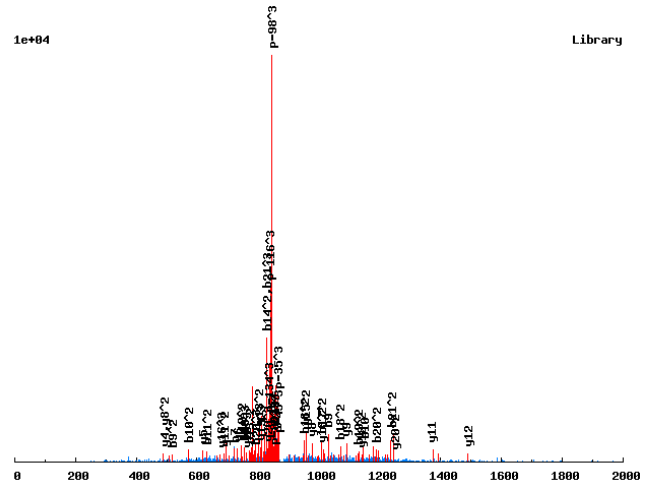

| Library | b <sup>1+</sup> | b <sup>2+</sup> | b <sup>3+</sup> | #  | AA     | #  | y <sup>1+</sup> | y <sup>2+</sup> | y <sup>3+</sup> |
|---------|-----------------|-----------------|-----------------|----|--------|----|-----------------|-----------------|-----------------|
|         | 72.0444         | 36.5258         | 24.6863         | 1  | A      | 22 |                 |                 |                 |
|         | 143.0815        | 72.0444         | 48.3654         | 2  | A      | 21 | 2562.9529       | 1281.9801       | 854.9891        |
|         | 214.1186        | 107.5629        | 72.0444         | 3  | A      | 20 | 2491.9158       | 1246.4615       | 831.3101        |
|         | 351.1775        | 176.0924        | 117.7307        | 4  | H      | 19 | 2420.8786       | 1210.9430       | 807.6311        |
|         | 479.2361        | 240.1217        | 160.4169        | 5  | Q      | 18 | 2283.8197       | 1142.4135       | 761.9448        |
|         | 607.2947        | 304.1510        | 203.1031        | 6  | Q      | 17 | 2155.7612       | 1078.3842       | 719.2586        |
|         | 721.3376        | 361.1724        | 241.1174        | 7  | N      | 16 | 2027.7026       | 1014.3549       | 676.5724        |
|         | 884.4009        | 442.7041        | 295.4718        | 8  | Y      | 15 | 1913.6596       | 957.3335        | 638.5581        |
|         | 1031.4694       | 516.2383        | 344.4946        | 9  | F      | 14 | 1750.5963       | 875.8018        | 584.2036        |
|         | 1145.5123       | 573.2598        | 382.5089        | 10 | N      | 13 | 1603.5279       | 802.2676        | 535.1808        |
|         | 1260.5392       | 630.7733        | 420.8513        | 11 | D      | 12 | 1489.4850       | 745.2461        | 497.1665        |
|         | 1427.5376       | 714.2724        | 476.5174        | 12 | S[167] | 11 | 1374.4580       | 687.7327        | 458.8242        |
|         | 1542.5645       | 771.7859        | 514.8597        | 13 | D      | 10 | 1207.4597       | 604.2335        | 403.1581        |
|         | 1657.5915       | 829.2994        | 553.2020        | 14 | D      | 9  | 1092.4327       | 546.7200        | 364.8158        |
|         | 1786.6341       | 893.8207        | 596.2162        | 15 | E      | 8  | 977.4058        | 489.2065        | 326.4735        |
|         | 1901.6610       | 951.3341        | 634.5585        | 16 | D      | 7  | 848.3632        | 424.6852        | 283.4593        |
|         | 2016.6879       | 1008.8476       | 672.9008        | 17 | D      | 6  | 733.3363        | 367.1718        | 245.1169        |
|         | 2145.7305       | 1073.3689       | 715.9150        | 18 | E      | 5  | 618.3093        | 309.6583        | 206.7746        |
|         | 2260.7575       | 1130.8824       | 754.2573        | 19 | D      | 4  | 489.2667        | 245.1370        | 163.7604        |
|         | 2374.8004       | 1187.9038       | 792.2717        | 20 | N      | 3  | 374.2398        | 187.6235        | 125.4181        |
|         | 2487.8845       | 1244.4459       | 829.9663        | 21 | I      | 2  | 260.1969        | 130.6021        | 87.4038         |
|         |                 |                 |                 | 22 | K      | 1  | 147.1128        | 74.0600         | 49.7091         |

# Annotated spectra from Saleem et. al. 2009

K.AADQADESS<sub>167</sub>PLLS<sub>167</sub>PSNS<sub>167</sub>NHPS<sub>167</sub>EHPQQLNKK.S/3

0.9676

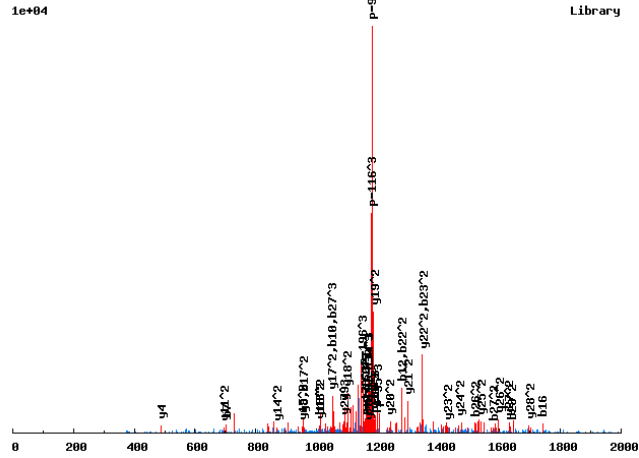

| Library | b <sup>1+</sup>  | b <sup>2+</sup>  | b <sup>3+</sup>  | #  | AA     | #  | y <sup>1+</sup>  | y <sup>2+</sup>  | y <sup>3+</sup>  |
|---------|------------------|------------------|------------------|----|--------|----|------------------|------------------|------------------|
|         | 72.0444          | 36.5258          | 24.6863          | 1  | A      | 31 |                  |                  |                  |
|         | 143.0815         | 72.0444          | 48.3654          | 2  | A      | 30 | 3576.3390        | 1788.6732        | <b>1192.7845</b> |
|         | 258.1084         | 129.5579         | 86.7077          | 3  | D      | 29 | 3505.3019        | 1753.1546        | <b>1169.1055</b> |
|         | 386.1670         | 193.5871         | 129.3939         | 4  | Q      | 28 | 3390.2750        | <b>1695.6411</b> | 1130.7632        |
|         | 457.2041         | 229.1057         | 153.0729         | 5  | A      | 27 | 3262.2164        | <b>1631.6118</b> | <b>1088.0770</b> |
|         | 572.2311         | 286.6192         | 191.4152         | 6  | D      | 26 | 3191.1793        | <b>1596.0933</b> | 1064.3979        |
|         | <b>701.2737</b>  | 351.1405         | 234.4294         | 7  | E      | 25 | 3076.1523        | <b>1538.5798</b> | 1026.0556        |
|         | 788.3057         | 394.6565         | 263.4401         | 8  | S      | 24 | 2947.1098        | <b>1474.0585</b> | 983.0414         |
|         | 955.3041         | 478.1557         | 319.1062         | 9  | S[167] | 23 | 2860.0777        | <b>1430.5425</b> | 954.0308         |
|         | <b>1052.3568</b> | 526.6820         | 351.4571         | 10 | P      | 22 | 2693.0794        | <b>1347.0433</b> | 898.3646         |
|         | <b>1165.4409</b> | 583.2241         | 389.1518         | 11 | L      | 21 | 2596.0266        | <b>1298.5169</b> | 866.0137         |
|         | <b>1278.5249</b> | 639.7661         | 426.8465         | 12 | L      | 20 | 2482.9425        | <b>1241.9749</b> | 828.3190         |
|         | 1445.5233        | 723.2653         | 482.5126         | 13 | S[167] | 19 | 2369.8585        | <b>1185.4329</b> | 790.6243         |
|         | 1542.5761        | 771.7917         | 514.8635         | 14 | P      | 18 | 2202.8601        | <b>1101.9337</b> | 734.9582         |
|         | 1629.6081        | 815.3077         | 543.8742         | 15 | S      | 17 | 2105.8074        | <b>1053.4073</b> | 702.6073         |
|         | <b>1743.6510</b> | 872.3291         | 581.8885         | 16 | N      | 16 | 2018.7753        | <b>1009.8913</b> | 673.5966         |
|         | 1910.6494        | <b>955.8283</b>  | 637.5546         | 17 | S[167] | 15 | 1904.7324        | <b>952.8698</b>  | 635.5823         |
|         | 2024.6923        | <b>1012.8498</b> | 675.5690         | 18 | N      | 14 | 1737.7340        | <b>869.3707</b>  | 579.9162         |
|         | 2161.7512        | 1081.3792        | 721.2553         | 19 | H      | 13 | 1623.6911        | 812.3492         | 541.9019         |
|         | 2258.8040        | 1129.9056        | 753.6062         | 20 | P      | 12 | 1486.6322        | 743.8197         | 496.2156         |
|         | 2425.8023        | 1213.4048        | 809.2723         | 21 | S[167] | 11 | 1389.5794        | <b>695.2934</b>  | 463.8647         |
|         | 2554.8449        | <b>1277.9261</b> | 852.2865         | 22 | E      | 10 | 1222.5811        | 611.7942         | 408.1985         |
|         | 2691.9038        | <b>1346.4556</b> | 897.9728         | 23 | H      | 9  | <b>1093.5385</b> | 547.2729         | 365.1843         |
|         | 2788.9566        | 1394.9819        | 930.3237         | 24 | P      | 8  | <b>956.4796</b>  | 478.7434         | 319.4980         |
|         | 2917.0152        | 1459.0112        | 973.0099         | 25 | Q      | 7  | 859.4268         | 430.2171         | 287.1471         |
|         | 3045.0738        | <b>1523.0405</b> | 1015.6961        | 26 | Q      | 6  | 731.3682         | 366.1878         | 244.4609         |
|         | 3160.1007        | <b>1580.5540</b> | <b>1054.0384</b> | 27 | D      | 5  | 603.3097         | 302.1585         | 201.7747         |
|         | 3273.1848        | <b>1637.0960</b> | 1091.7331        | 28 | L      | 4  | <b>488.2827</b>  | 244.6450         | 163.4324         |
|         | 3387.2277        | 1694.1175        | 1129.7474        | 29 | N      | 3  | 375.1987         | 188.1030         | 125.7377         |
|         | 3501.2706        | 1751.1389        | <b>1167.7617</b> | 30 | N      | 2  | 261.1557         | 131.0815         | 87.7234          |
|         |                  |                  |                  | 31 | K      | 1  | 147.1128         | 74.0600          | 49.7091          |

# Annotated spectra from Saleem et. al. 2009

K.AADQADESSPLLS<sub>167</sub>PSNS<sub>167</sub>NHPS<sub>167</sub>EHPQDLNKS/4

0.934

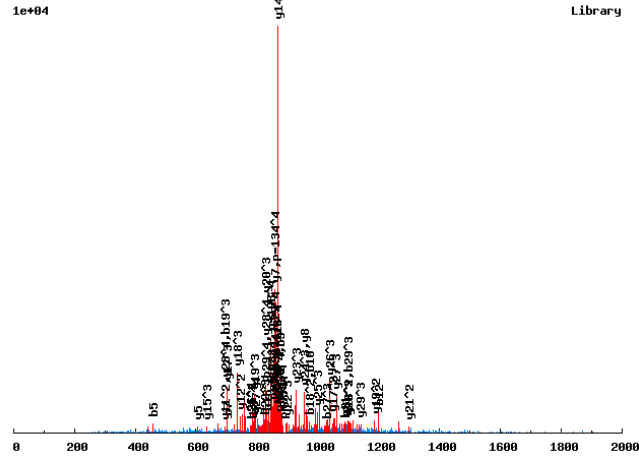

| Library | b <sup>1+</sup> | b <sup>2+</sup> | b <sup>3+</sup> | b <sup>4+</sup> | #  | AA     | #  | y <sup>1+</sup> | y <sup>2+</sup> | y <sup>3+</sup> | y <sup>4+</sup> |
|---------|-----------------|-----------------|-----------------|-----------------|----|--------|----|-----------------|-----------------|-----------------|-----------------|
|         | 72.0444         | 36.5258         | 24.6863         | 18.7666         | 1  | A      | 31 |                 |                 |                 |                 |
|         | 143.0815        | 72.0444         | 48.3654         | 36.5258         | 2  | A      | 30 | 3496.3727       | 1748.6900       | 1166.1291       | 874.8486        |
|         | 258.1084        | 129.5579        | 86.7077         | 65.2826         | 3  | D      | 29 | 3425.3356       | 1713.1714       | 1142.4500       | 857.0894        |
|         | 386.1670        | 193.5871        | 129.3939        | 97.2972         | 4  | Q      | 28 | 3310.3086       | 1655.6580       | 1104.1077       | 828.3326        |
|         | 457.2041        | 229.1057        | 153.0729        | 115.0565        | 5  | A      | 27 | 3182.2501       | 1591.6287       | 1061.4215       | 796.3180        |
|         | 572.2311        | 286.6192        | 191.4152        | 143.8132        | 6  | D      | 26 | 3111.2130       | 1556.1101       | 1037.7425       | 778.5587        |
|         | 701.2737        | 351.1405        | 234.4294        | 176.0739        | 7  | E      | 25 | 2996.1860       | 1498.5966       | 999.4002        | 749.8020        |
|         | 788.3057        | 394.6565        | 263.4401        | 197.8319        | 8  | S      | 24 | 2867.1434       | 1434.0754       | 956.3860        | 717.5413        |
|         | 875.3377        | 438.1725        | 292.4508        | 219.5899        | 9  | S      | 23 | 2780.1114       | 1390.5593       | 927.3753        | 695.7833        |
|         | 972.3905        | 486.6989        | 324.8017        | 243.8531        | 10 | P      | 22 | 2693.0794       | 1347.0433       | 898.3646        | 674.0253        |
|         | 1085.4745       | 543.2409        | 362.4964        | 272.1241        | 11 | L      | 21 | 2596.0266       | 1298.5169       | 866.0137        | 649.7621        |
|         | 1198.5586       | 599.7829        | 400.1911        | 300.3951        | 12 | L      | 20 | 2482.9425       | 1241.9749       | 828.3190        | 621.4911        |
|         | 1365.5570       | 683.2821        | 455.8572        | 342.1447        | 13 | S[167] | 19 | 2369.8585       | 1185.4329       | 790.6243        | 593.2201        |
|         | 1462.6097       | 731.8085        | 488.2081        | 366.4079        | 14 | P      | 18 | 2202.8601       | 1101.9337       | 734.9582        | 551.4705        |
|         | 1549.6418       | 775.3245        | 517.2188        | 388.1659        | 15 | S      | 17 | 2105.8074       | 1053.4073       | 702.6073        | 527.2073        |
|         | 1663.6847       | 832.3460        | 555.2331        | 416.6766        | 16 | N      | 16 | 2018.7753       | 1009.8913       | 673.5966        | 505.4493        |
|         | 1830.6830       | 915.8452        | 610.8992        | 458.4262        | 17 | S[167] | 15 | 1904.7324       | 952.8698        | 635.5823        | 476.9386        |
|         | 1944.7260       | 972.8666        | 648.9135        | 486.9370        | 18 | N      | 14 | 1737.7340       | 869.3707        | 579.9162        | 435.1890        |
|         | 2081.7849       | 1041.3961       | 694.5998        | 521.2017        | 19 | H      | 13 | 1623.6911       | 812.3492        | 541.9019        | 406.6782        |
|         | 2178.8376       | 1089.9225       | 726.9507        | 545.4649        | 20 | P      | 12 | 1486.6322       | 743.8197        | 496.2156        | 372.4135        |
|         | 2345.8360       | 1173.4216       | 782.6169        | 587.2145        | 21 | S[167] | 11 | 1389.5794       | 695.2934        | 463.8647        | 348.1503        |
|         | 2474.8786       | 1237.9429       | 825.6311        | 619.4751        | 22 | E      | 10 | 1222.5811       | 611.7942        | 408.1985        | 306.4007        |
|         | 2611.9375       | 1306.4724       | 871.3174        | 653.7398        | 23 | H      | 9  | 1093.5385       | 547.2729        | 365.1843        | 274.1401        |
|         | 2708.9903       | 1354.9988       | 903.6683        | 678.0030        | 24 | P      | 8  | 956.4796        | 478.7434        | 319.4980        | 239.8754        |
|         | 2837.0488       | 1419.0281       | 946.3545        | 710.0177        | 25 | Q      | 7  | 859.4268        | 430.2171        | 287.1471        | 215.6122        |
|         | 2965.1074       | 1483.0574       | 989.0407        | 742.0323        | 26 | Q      | 6  | 731.3682        | 366.1878        | 244.4609        | 183.5975        |
|         | 3080.1344       | 1540.5708       | 1027.3830       | 770.7891        | 27 | D      | 5  | 603.3097        | 302.1585        | 201.7747        | 151.5829        |
|         | 3193.2184       | 1597.1129       | 1065.0777       | 799.0601        | 28 | L      | 4  | 488.2827        | 244.6450        | 163.4324        | 122.8261        |
|         | 3307.2614       | 1654.1343       | 1103.0920       | 827.5708        | 29 | N      | 3  | 375.1987        | 188.1030        | 125.7377        | 94.5551         |
|         | 3421.3043       | 1711.1558       | 1141.1063       | 856.0815        | 30 | N      | 2  | 261.1557        | 131.0815        | 87.7234         | 66.0444         |
|         |                 |                 |                 |                 | 31 | K      | 1  | 147.1128        | 74.0600         | 49.7091         | 37.5337         |

# Annotated spectra from Saleem et. al. 2009

R.AADT<sub>181</sub>PETS<sub>167</sub>DAVHTEQK<sub>136</sub>PEEEK<sub>136</sub>ETLQEE-/-3

0.9832

1e+04

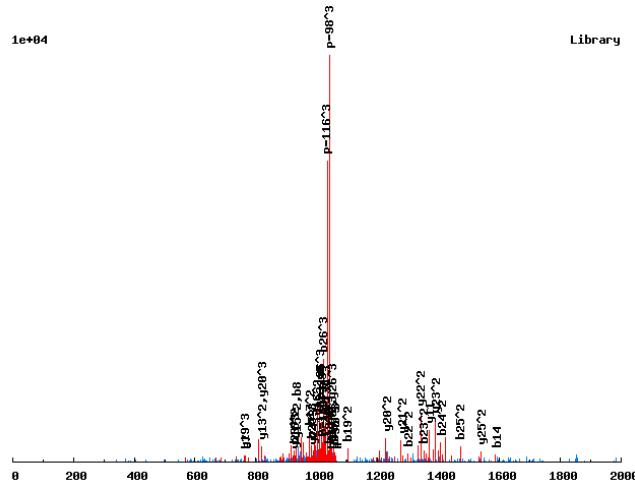

| Library | b <sup>1+</sup>  | b <sup>2+</sup>  | b <sup>3+</sup>  | #  | AA      | #  | y <sup>1+</sup>  | y <sup>2+</sup>  | y <sup>3+</sup>  |
|---------|------------------|------------------|------------------|----|---------|----|------------------|------------------|------------------|
|         | 72.0444          | 36.5258          | 24.6863          | 1  | A       | 27 |                  |                  |                  |
|         | 143.0815         | 72.0444          | 48.3654          | 2  | A       | 26 | 3146.2944        | 1573.6509        | <b>1049.4363</b> |
|         | 258.1084         | 129.5579         | 86.7077          | 3  | D       | 25 | 3075.2573        | <b>1538.1323</b> | <b>1025.7573</b> |
|         | 439.1225         | 220.0649         | 147.0457         | 4  | T [181] | 24 | 2960.2304        | 1480.6188        | <b>987.4150</b>  |
|         | 536.1752         | 268.5912         | 179.3966         | 5  | P       | 23 | 2779.2164        | <b>1390.1118</b> | <b>927.0770</b>  |
|         | 665.2178         | 333.1125         | 222.4108         | 6  | E       | 22 | 2682.1636        | <b>1341.5855</b> | 894.7261         |
|         | <b>766.2655</b>  | 383.6364         | 256.0933         | 7  | T       | 21 | 2553.1210        | <b>1277.0642</b> | 851.7119         |
|         | <b>933.2638</b>  | 467.1356         | 311.7595         | 8  | S [167] | 20 | 2452.0734        | <b>1226.5403</b> | <b>818.0293</b>  |
|         | <b>1048.2908</b> | 524.6490         | 350.1018         | 9  | D       | 19 | 2285.0750        | 1143.0411        | <b>762.3632</b>  |
|         | 1119.3279        | 560.1676         | 373.7808         | 10 | A       | 18 | 2170.0481        | 1085.5277        | 724.0209         |
|         | 1218.3963        | 609.7018         | 406.8036         | 11 | V       | 17 | 2099.0109        | <b>1050.0091</b> | 700.3418         |
|         | 1355.4552        | 678.2312         | 452.4899         | 12 | H       | 16 | 1999.9425        | <b>1000.4749</b> | 667.3190         |
|         | 1456.5029        | 728.7551         | 486.1725         | 13 | T       | 15 | 1862.8836        | <b>931.9455</b>  | 621.6327         |
|         | <b>1585.5455</b> | 793.2764         | 529.1867         | 14 | E       | 14 | 1761.8359        | 881.4216         | 587.9502         |
|         | 1713.6041        | 857.3057         | 571.8729         | 15 | Q       | 13 | 1632.7934        | <b>816.9003</b>  | 544.9360         |
|         | 1849.7132        | <b>925.3603</b>  | 617.2426         | 16 | K [136] | 12 | 1504.7348        | 752.8710         | 502.2498         |
|         | 1946.7660        | <b>973.8866</b>  | 649.5935         | 17 | P       | 11 | <b>1368.6256</b> | 684.8164         | 456.8801         |
|         | 2075.8086        | <b>1038.4079</b> | 692.6077         | 18 | E       | 10 | 1271.5729        | 636.2901         | 424.5291         |
|         | 2204.8512        | <b>1102.9292</b> | 735.6219         | 19 | E       | 9  | 1142.5303        | 571.7688         | 381.5149         |
|         | 2333.8938        | 1167.4505        | 778.6361         | 20 | E       | 8  | <b>1013.4877</b> | 507.2475         | 338.5007         |
|         | 2470.0029        | 1235.5051        | 824.0058         | 21 | K [136] | 7  | 884.4451         | 442.7262         | 295.4865         |
|         | 2599.0455        | <b>1300.0264</b> | 867.0200         | 22 | E       | 6  | 748.3359         | 374.6716         | 250.1168         |
|         | 2700.0932        | <b>1350.5502</b> | 900.7026         | 23 | T       | 5  | 619.2933         | 310.1503         | 207.1026         |
|         | 2813.1772        | <b>1407.0923</b> | 938.3973         | 24 | L       | 4  | 518.2457         | 259.6265         | 173.4201         |
|         | 2941.2358        | <b>1471.1215</b> | <b>981.0835</b>  | 25 | Q       | 3  | 405.1616         | 203.0844         | 135.7254         |
|         | 3070.2784        | 1535.6428        | <b>1024.0977</b> | 26 | E       | 2  | 277.1030         | 139.0551         | 93.0392          |
|         |                  |                  |                  | 27 | E       | 1  | 148.0604         | 74.5339          | 50.0250          |

# Annotated spectra from Saleem et. al. 2009

R.AADVENLS<sub>167</sub>DDDEHRQNESR.V/3

0.9756

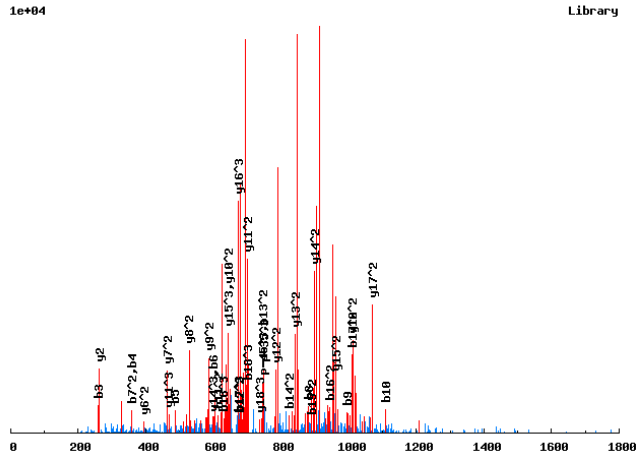

| Library | b <sup>1+</sup> | b <sup>2+</sup> | b <sup>3+</sup> | #  | AA     | #  | y <sup>1+</sup> | y <sup>2+</sup> | y <sup>3+</sup> |
|---------|-----------------|-----------------|-----------------|----|--------|----|-----------------|-----------------|-----------------|
|         | 72.0444         | 36.5258         | 24.6863         | 1  | A      | 19 |                 |                 |                 |
|         | 143.0815        | 72.0444         | 48.3654         | 2  | A      | 18 | 2208.8789       | 1104.9431       | 736.9645        |
|         | 258.1084        | 129.5579        | 86.7077         | 3  | D      | 17 | 2137.8418       | 1069.4245       | 713.2855        |
|         | 357.1769        | 179.0921        | 119.7305        | 4  | V      | 16 | 2022.8149       | 1011.9111       | 674.9431        |
|         | 486.2194        | 243.6134        | 162.7447        | 5  | E      | 15 | 1923.7465       | 962.3769        | 641.9203        |
|         | 600.2624        | 300.6348        | 200.7590        | 6  | N      | 14 | 1794.7039       | 897.8556        | 598.9061        |
|         | 713.3464        | 357.1769        | 238.4537        | 7  | L      | 13 | 1680.6609       | 840.8341        | 560.8918        |
|         | 880.3448        | 440.6760        | 294.1198        | 8  | S[167] | 12 | 1567.5769       | 784.2921        | 523.1971        |
|         | 995.3717        | 498.1895        | 332.4621        | 9  | D      | 11 | 1400.5785       | 700.7929        | 467.5310        |
|         | 1110.3987       | 555.7030        | 370.8044        | 10 | D      | 10 | 1285.5516       | 643.2794        | 429.1887        |
|         | 1225.4256       | 613.2164        | 409.1467        | 11 | D      | 9  | 1170.5246       | 585.7660        | 390.8464        |
|         | 1354.4682       | 677.7377        | 452.1609        | 12 | E      | 8  | 1055.4977       | 528.2525        | 352.5041        |
|         | 1491.5271       | 746.2672        | 497.8472        | 13 | H      | 7  | 926.4551        | 463.7312        | 309.4899        |
|         | 1647.6282       | 824.3178        | 549.8809        | 14 | R      | 6  | 789.3962        | 395.2017        | 263.8036        |
|         | 1775.6868       | 888.3470        | 592.5671        | 15 | Q      | 5  | 633.2951        | 317.1512        | 211.7699        |
|         | 1889.7297       | 945.3685        | 630.5814        | 16 | N      | 4  | 505.2365        | 253.1219        | 169.0837        |
|         | 2018.7723       | 1009.8898       | 673.5956        | 17 | E      | 3  | 391.1936        | 196.1004        | 131.0694        |
|         | 2105.8044       | 1053.4058       | 702.6063        | 18 | S      | 2  | 262.1510        | 131.5791        | 88.0552         |
|         |                 |                 |                 | 19 | R      | 1  | 175.1190        | 88.0631         | 59.0445         |



# Annotated spectra from Saleem et. al. 2009

K.AANMS<sub>167</sub>DDESS<sub>167</sub>LIK<sub>136</sub>N/2

0.9841

1e+04

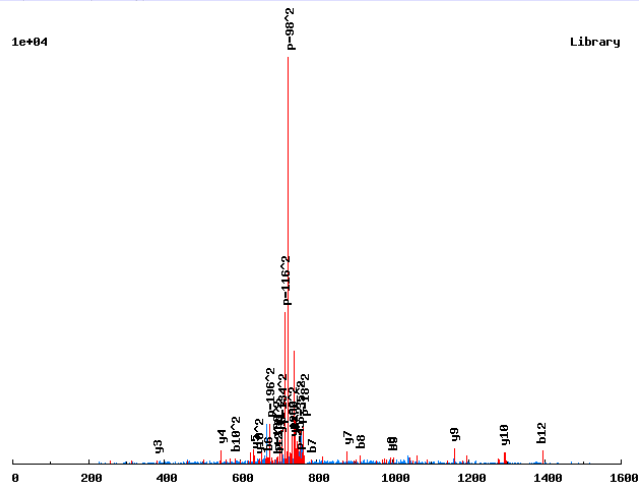

| Library | b <sup>1+</sup> | b <sup>2+</sup> | #  | AA     | #  | y <sup>1+</sup> | y <sup>2+</sup> |
|---------|-----------------|-----------------|----|--------|----|-----------------|-----------------|
|         | 72.0444         | 36.5258         | 1  | A      | 13 |                 |                 |
|         | 143.0815        | 72.0444         | 2  | A      | 12 | 1477.5409       | 739.2741        |
|         | 257.1244        | 129.0659        | 3  | N      | 11 | 1406.5038       | 703.7555        |
|         | 388.1649        | 194.5861        | 4  | M      | 10 | 1292.4608       | 646.7341        |
|         | 555.1633        | 278.0853        | 5  | S[167] | 9  | 1161.4203       | 581.2138        |
|         | 670.1902        | 335.5988        | 6  | D      | 8  | 994.4220        | 497.7146        |
|         | 785.2172        | 393.1122        | 7  | D      | 7  | 879.3950        | 440.2012        |
|         | 914.2598        | 457.6335        | 8  | E      | 6  | 764.3681        | 382.6877        |
|         | 1001.2918       | 501.1495        | 9  | S      | 5  | 635.3255        | 318.1664        |
|         | 1168.2901       | 584.6487        | 10 | S[167] | 4  | 548.2935        | 274.6504        |
|         | 1281.3742       | 641.1907        | 11 | L      | 3  | 381.2951        | 191.1512        |
|         | 1394.4583       | 697.7328        | 12 | I      | 2  | 268.2111        | 134.6092        |
|         |                 |                 | 13 | K[136] | 1  | 155.1270        | 78.0671         |

# Annotated spectra from Saleem et. al. 2009

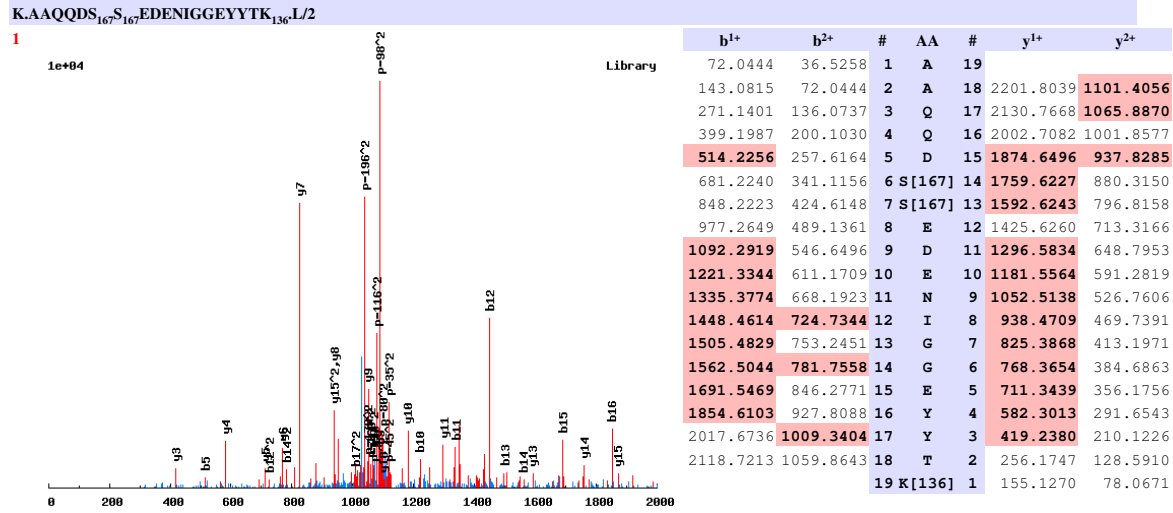

# Annotated spectra from Saleem et. al. 2009

K.AAS<sub>167</sub>VS<sub>167</sub>PSTK<sub>136</sub>PLNTEPESSVQPTVSSSSTTK<sub>136</sub>A/3

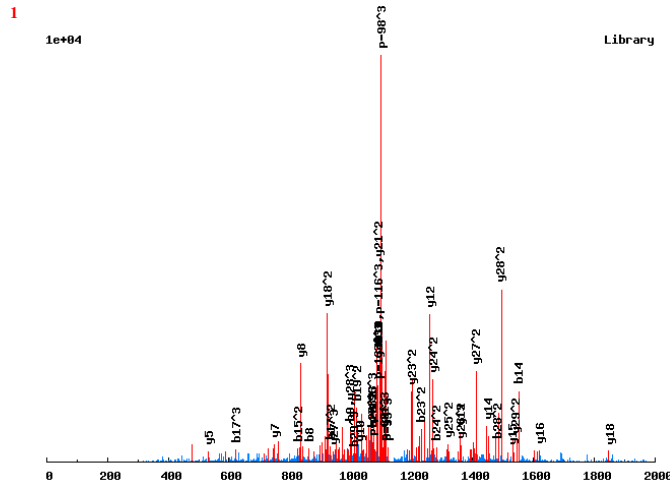

| Library | b <sup>1+</sup> | b <sup>2+</sup> | b <sup>3+</sup> | #  | AA     | #  | y <sup>1+</sup> | y <sup>2+</sup> | y <sup>3+</sup> |
|---------|-----------------|-----------------|-----------------|----|--------|----|-----------------|-----------------|-----------------|
|         | 72.0444         | 36.5258         | 24.6863         | 1  | A      | 32 |                 |                 |                 |
|         | 143.0815        | 72.0444         | 48.3654         | 2  | A      | 31 | 3325.4942       | 1663.2508       | 1109.1696       |
|         | 310.0799        | 155.5436        | 104.0315        | 3  | S[167] | 30 | 3254.4571       | 1627.7322       | 1085.4906       |
|         | 409.1483        | 205.0778        | 137.0543        | 4  | V      | 29 | 3087.4588       | 1544.2330       | 1029.8244       |
|         | 576.1466        | 288.5770        | 192.7204        | 5  | S[167] | 28 | 2988.3904       | 1494.6988       | 996.8016        |
|         | 673.1994        | 337.1033        | 225.0713        | 6  | P      | 27 | 2821.3920       | 1411.1996       | 941.1355        |
|         | 760.2314        | 380.6194        | 254.0820        | 7  | S      | 26 | 2724.3392       | 1362.6733       | 908.7846        |
|         | 861.2791        | 431.1432        | 287.7646        | 8  | T      | 25 | 2637.3072       | 1319.1572       | 879.7739        |
|         | 997.3883        | 499.1978        | 333.1343        | 9  | K[136] | 24 | 2536.2595       | 1268.6334       | 846.0914        |
|         | 1094.4410       | 547.7242        | 365.4852        | 10 | P      | 23 | 2400.1504       | 1200.5788       | 800.7216        |
|         | 1207.5251       | 604.2662        | 403.1799        | 11 | L      | 22 | 2303.0976       | 1152.0524       | 768.3707        |
|         | 1321.5680       | 661.2876        | 441.1942        | 12 | N      | 21 | 2190.0135       | 1095.5104       | 730.6760        |
|         | 1422.6157       | 711.8115        | 474.8768        | 13 | T      | 20 | 2075.9706       | 1038.4889       | 692.6617        |
|         | 1551.6583       | 776.3328        | 517.8909        | 14 | E      | 19 | 1974.9229       | 987.9651        | 658.9792        |
|         | 1648.7110       | 824.8592        | 550.2419        | 15 | P      | 18 | 1845.8803       | 923.4438        | 615.9650        |
|         | 1777.7536       | 889.3805        | 593.2561        | 16 | E      | 17 | 1748.8276       | 874.9174        | 583.6140        |
|         | 1864.7857       | 932.8965        | 622.2667        | 17 | S      | 16 | 1619.7850       | 810.3961        | 540.5999        |
|         | 1951.8177       | 976.4125        | 651.2774        | 18 | S      | 15 | 1532.7530       | 766.8801        | 511.5892        |
|         | 2038.8497       | 1019.9285       | 680.2881        | 19 | S      | 14 | 1445.7209       | 723.3641        | 482.5785        |
|         | 2137.9181       | 1069.4627       | 713.3109        | 20 | V      | 13 | 1358.6889       | 679.8481        | 453.5678        |
|         | 2265.9767       | 1133.4920       | 755.9971        | 21 | Q      | 12 | 1259.6205       | 630.3139        | 420.5450        |
|         | 2363.0295       | 1182.0184       | 788.3480        | 22 | P      | 11 | 1131.5619       | 566.2846        | 377.8588        |
|         | 2464.0772       | 1232.5422       | 822.0306        | 23 | T      | 10 | 1034.5092       | 517.7582        | 345.5079        |
|         | 2563.1456       | 1282.0764       | 855.0534        | 24 | V      | 9  | 933.4615        | 467.2344        | 311.8253        |
|         | 2650.1776       | 1325.5924       | 884.0641        | 25 | S      | 8  | 834.3931        | 417.7002        | 278.8025        |
|         | 2737.2096       | 1369.1085       | 913.0747        | 26 | S      | 7  | 747.3610        | 374.1842        | 249.7919        |
|         | 2866.2522       | 1433.6297       | 956.0889        | 27 | E      | 6  | 660.3290        | 330.6681        | 220.7812        |
|         | 2953.2842       | 1477.1458       | 985.0996        | 28 | S      | 5  | 531.2864        | 266.1468        | 177.7670        |
|         | 3040.3163       | 1520.6618       | 1014.1103       | 29 | S      | 4  | 444.2544        | 222.6308        | 148.7563        |
|         | 3141.3640       | 1571.1856       | 1047.7928       | 30 | T      | 3  | 357.2224        | 179.1148        | 119.7456        |
|         | 3242.4116       | 1621.7095       | 1081.4754       | 31 | T      | 2  | 256.1747        | 128.5910        | 86.0631         |
|         |                 |                 |                 | 32 | K[136] | 1  | 155.1270        | 78.0671         | 52.3805         |
| Library | b <sup>1+</sup> | b <sup>2+</sup> | b <sup>3+</sup> | #  | AA     | #  | y <sup>1+</sup> | y <sup>2+</sup> | y <sup>3+</sup> |
|         | 72.0444         | 36.5258         | 24.6863         | 1  | A      | 32 |                 |                 |                 |
|         | 143.0815        | 72.0444         | 48.3654         | 2  | A      | 31 | 3325.4942       | 1663.2508       | 1109.1696       |
|         | 310.0799        | 155.5436        | 104.0315        | 3  | S[167] | 30 | 3254.4571       | 1627.7322       | 1085.4906       |
|         | 409.1483        | 205.0778        | 137.0543        | 4  | V      | 29 | 3087.4588       | 1544.2330       | 1029.8244       |
|         | 576.1466        | 288.5770        | 192.7204        | 5  | S[167] | 28 | 2988.3904       | 1494.6988       | 996.8016        |
|         | 673.1994        | 337.1033        | 225.0713        | 6  | P      | 27 | 2821.3920       | 1411.1996       | 941.1355        |
|         | 760.2314        | 380.6194        | 254.0820        | 7  | S      | 26 | 2724.3392       | 1362.6733       | 908.7846        |
|         | 861.2791        | 431.1432        | 287.7646        | 8  | T      | 25 | 2637.3072       | 1319.1572       | 879.7739        |
|         | 997.3883        | 499.1978        | 333.1343        | 9  | K[136] | 24 | 2536.2595       | 1268.6334       | 846.0914        |
|         | 1094.4410       | 547.7242        | 365.4852        | 10 | P      | 23 | 2400.1504       | 1200.5788       | 800.7216        |
|         | 1207.5251       | 604.2662        | 403.1799        | 11 | L      | 22 | 2303.0976       | 1152.0524       | 768.3707        |
|         | 1321.5680       | 661.2876        | 441.1942        | 12 | N      | 21 | 2190.0135       | 1095.5104       | 730.6760        |
|         | 1422.6157       | 711.8115        | 474.8768        | 13 | T      | 20 | 2075.9706       | 1038.4889       | 692.6617        |
|         | 1551.6583       | 776.3328        | 517.8909        | 14 | E      | 19 | 1974.9229       | 987.9651        | 658.9792        |
|         | 1648.7110       | 824.8592        | 550.2419        | 15 | P      | 18 | 1845.8803       | 923.4438        | 615.9650        |
|         | 1777.7536       | 889.3805        | 593.2561        | 16 | E      | 17 | 1748.8276       | 874.9174        | 583.6140        |
|         | 1864.7857       | 932.8965        | 622.2667        | 17 | S      | 16 | 1619.7850       | 810.3961        | 540.5999        |
|         | 1951.8177       | 976.4125        | 651.2774        | 18 | S      | 15 | 1532.7530       | 766.8801        | 511.5892        |
|         | 2038.8497       | 1019.9285       | 680.2881        | 19 | S      | 14 | 1445.7209       | 723.3641        | 482.5785        |

# Annotated spectra from Saleem et. al. 2009

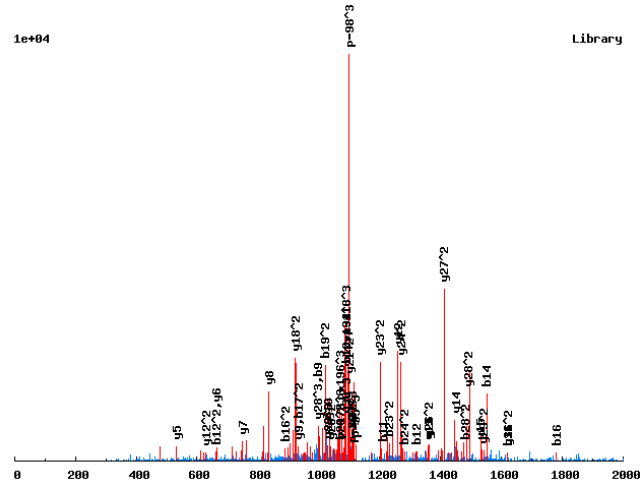

| Library | m/z       | Intensity | Library | m/z       | Intensity | Library | m/z | Intensity |
|---------|-----------|-----------|---------|-----------|-----------|---------|-----|-----------|
|         | 2137.9181 | 1069.4627 |         | 713.3109  | 20        | V       | 13  | 1358.6889 |
|         | 2265.9767 | 1133.4920 |         | 755.9971  | 21        | Q       | 12  | 1259.6205 |
|         | 2363.0295 | 1182.0184 |         | 788.3480  | 22        | P       | 11  | 1131.5619 |
|         | 2464.0772 | 1232.5422 |         | 822.0306  | 23        | T       | 10  | 1034.5092 |
|         | 2563.1456 | 1282.0764 |         | 855.0534  | 24        | V       | 9   | 933.4615  |
|         | 2650.1776 | 1325.5924 |         | 884.0641  | 25        | S       | 8   | 834.3931  |
|         | 2737.2096 | 1369.1085 |         | 913.0747  | 26        | S       | 7   | 747.3610  |
|         | 2866.2522 | 1433.6297 |         | 956.0889  | 27        | E       | 6   | 660.3290  |
|         | 2953.2842 | 1477.1458 |         | 985.0996  | 28        | S       | 5   | 531.2864  |
|         | 3040.3163 | 1520.6618 |         | 1014.1103 | 29        | S       | 4   | 444.2544  |
|         | 3141.3640 | 1571.1856 |         | 1047.7928 | 30        | T       | 3   | 357.2224  |
|         | 3242.4116 | 1621.7095 |         | 1081.4754 | 31        | T       | 2   | 256.1747  |
|         |           |           |         |           | 32        | K[136]  | 1   | 155.1270  |
|         |           |           |         |           |           |         |     | 78.0671   |
|         |           |           |         |           |           |         |     | 52.3805   |

# Annotated spectra from Saleem et. al. 2009

K.ADEFDSPFAASAAAEEEEEDDVLFGS<sub>16</sub>DDEEADAEAKLK.A/3

0.9987

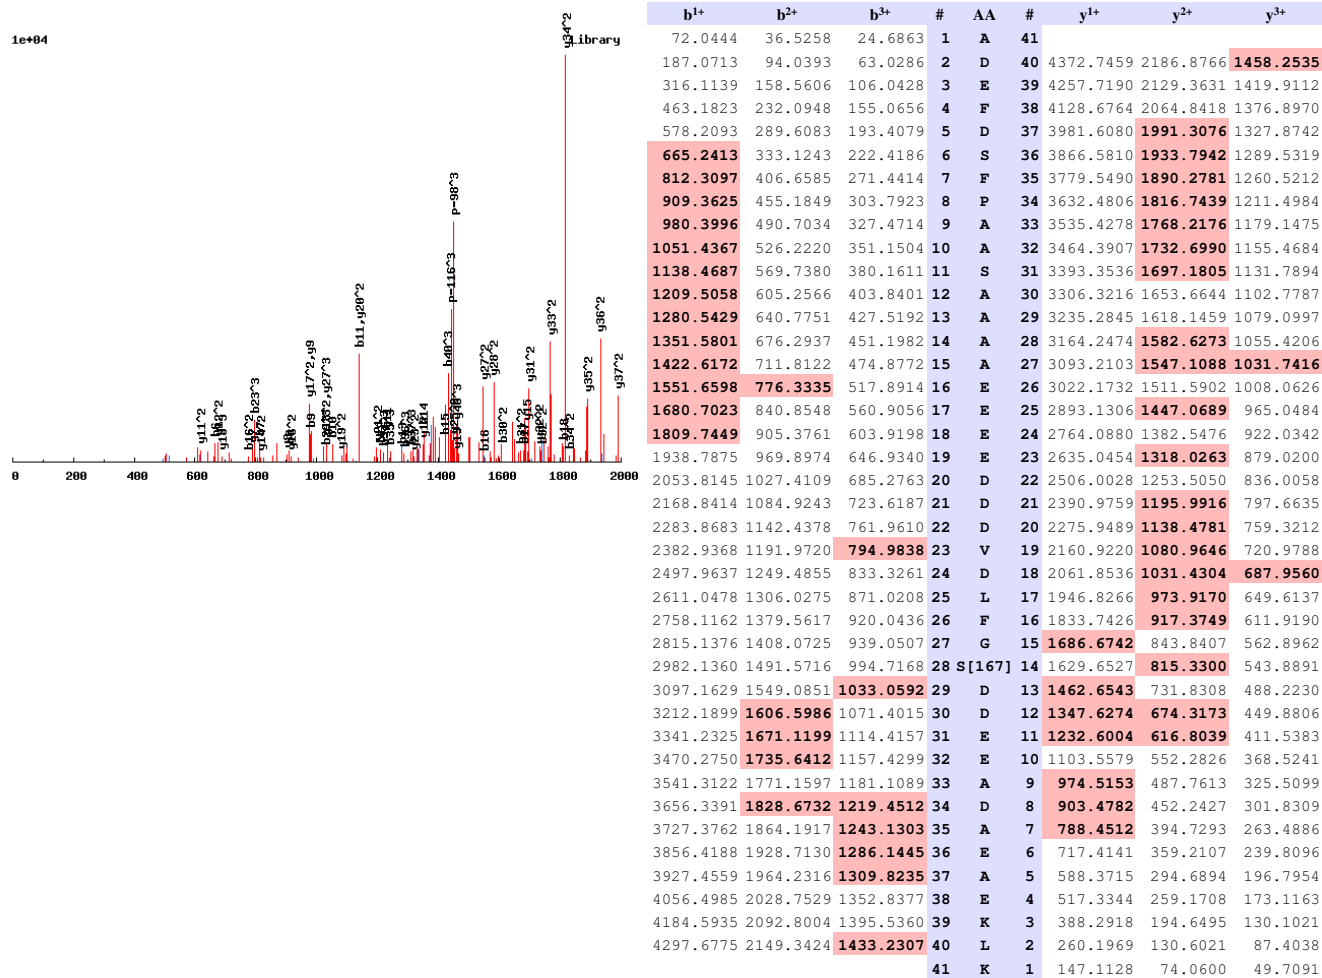

# Annotated spectra from Saleem et. al. 2009

R.ADNLLPS<sub>167</sub>PS<sub>167</sub>PQLTEDIK.C/2

0.9968

1e+04

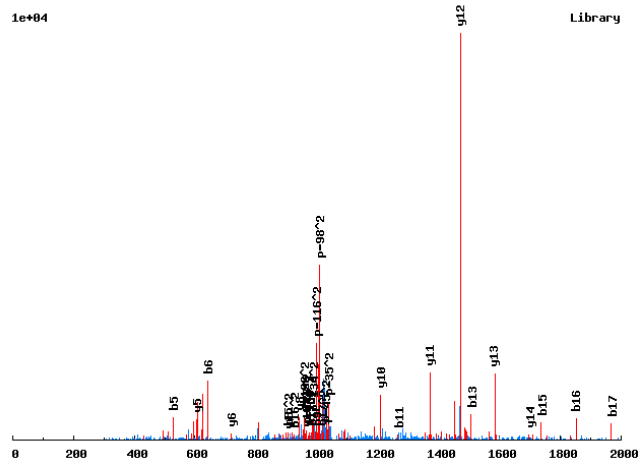

Library

|  | b <sup>1+</sup> | b <sup>2+</sup> | #  | AA     | #  | y <sup>1+</sup> | y <sup>2+</sup> |
|--|-----------------|-----------------|----|--------|----|-----------------|-----------------|
|  | 72.0444         | 36.5258         | 1  | A      | 18 |                 |                 |
|  | 187.0713        | 94.0393         | 2  | D      | 17 | 2040.8926       | 1020.9500       |
|  | 301.1143        | 151.0608        | 3  | N      | 16 | 1925.8657       | 963.4365        |
|  | 415.1572        | 208.0822        | 4  | N      | 15 | 1811.8228       | 906.4150        |
|  | 528.2413        | 264.6243        | 5  | L      | 14 | 1697.7798       | 849.3936        |
|  | 641.3253        | 321.1663        | 6  | L      | 13 | 1584.6958       | 792.8515        |
|  | 738.3781        | 369.6927        | 7  | P      | 12 | 1471.6117       | 736.3095        |
|  | 905.3764        | 453.1919        | 8  | S[167] | 11 | 1374.5590       | 687.7831        |
|  | 1002.4292       | 501.7182        | 9  | P      | 10 | 1207.5606       | 604.2839        |
|  | 1169.4276       | 585.2174        | 10 | S[167] | 9  | 1110.5078       | 555.7576        |
|  | 1266.4803       | 633.7438        | 11 | P      | 8  | 943.5095        | 472.2584        |
|  | 1394.5389       | 697.7731        | 12 | Q      | 7  | 846.4567        | 423.7320        |
|  | 1507.6230       | 754.3151        | 13 | L      | 6  | 718.3981        | 359.7027        |
|  | 1608.6706       | 804.8390        | 14 | T      | 5  | 605.3141        | 303.1607        |
|  | 1737.7132       | 869.3603        | 15 | E      | 4  | 504.2664        | 252.6368        |
|  | 1852.7402       | 926.8737        | 16 | D      | 3  | 375.2238        | 188.1155        |
|  | 1965.8242       | 983.4158        | 17 | I      | 2  | 260.1969        | 130.6021        |
|  |                 |                 | 18 | K      | 1  | 147.1128        | 74.0600         |

# Annotated spectra from Saleem et. al. 2009

R.ADS<sub>167</sub>-GDTS<sub>167</sub>-SIHSSANNTKGDK.I/3

0.6655

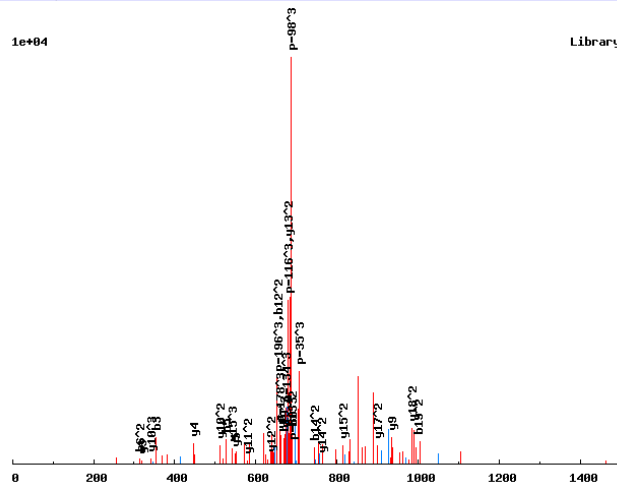

| Library | b <sup>1+</sup> | b <sup>2+</sup>  | b <sup>3+</sup> | #  | AA     | #  | y <sup>1+</sup> | y <sup>2+</sup> | y <sup>3+</sup> |
|---------|-----------------|------------------|-----------------|----|--------|----|-----------------|-----------------|-----------------|
|         | 72.0444         | 36.5258          | 24.6863         | 1  | A      | 20 |                 |                 |                 |
|         | 187.0713        | 94.0393          | 63.0286         | 2  | D      | 19 | 2080.7856       | 1040.8964       | 694.2667        |
|         | <b>354.0697</b> | 177.5385         | 118.6948        | 3  | S[167] | 18 | 1965.7587       | <b>983.3830</b> | 655.9244        |
|         | 411.0912        | 206.0492         | 137.7019        | 4  | G      | 17 | 1798.7603       | <b>899.8838</b> | 600.2583        |
|         | <b>526.1181</b> | 263.5627         | 176.0442        | 5  | D      | 16 | 1741.7389       | 871.3731        | 581.2511        |
|         | 627.1658        | <b>314.0865</b>  | 209.7268        | 6  | T      | 15 | 1626.7119       | <b>813.8596</b> | <b>542.9088</b> |
|         | 794.1641        | 397.5857         | 265.3929        | 7  | S[167] | 14 | 1525.6642       | <b>763.3358</b> | 509.2263        |
|         | 881.1962        | 441.1017         | 294.4036        | 8  | S      | 13 | 1358.6659       | <b>679.8366</b> | 453.5601        |
|         | 994.2802        | 497.6438         | 332.0983        | 9  | I      | 12 | 1271.6338       | <b>636.3206</b> | 424.5495        |
|         | 1131.3391       | 566.1732         | 377.7846        | 10 | H      | 11 | 1158.5498       | <b>579.7785</b> | 386.8548        |
|         | 1218.3712       | 609.6892         | 406.7952        | 11 | S      | 10 | 1021.4909       | <b>511.2491</b> | <b>341.1685</b> |
|         | 1305.4032       | <b>653.2052</b>  | 435.8059        | 12 | S      | 9  | <b>934.4588</b> | 467.7331        | 312.1578        |
|         | 1376.4403       | <b>688.7238</b>  | 459.4850        | 13 | A      | 8  | 847.4268        | 424.2170        | 283.1471        |
|         | 1490.4832       | <b>745.7453</b>  | 497.4993        | 14 | N      | 7  | 776.3897        | 388.6985        | 259.4681        |
|         | 1604.5262       | 802.7667         | 535.5136        | 15 | N      | 6  | <b>662.3468</b> | 331.6770        | 221.4538        |
|         | 1705.5738       | 853.2906         | 569.1961        | 16 | T      | 5  | <b>548.3038</b> | 274.6556        | 183.4395        |
|         | 1833.6688       | 917.3380         | 611.8945        | 17 | K      | 4  | <b>447.2562</b> | 224.1317        | 149.7569        |
|         | 1890.6903       | 945.8488         | 630.9016        | 18 | G      | 3  | <b>319.1612</b> | 160.0842        | 107.0586        |
|         | 2005.7172       | <b>1003.3622</b> | <b>669.2439</b> | 19 | D      | 2  | 262.1397        | 131.5735        | 88.0514         |
|         |                 |                  |                 | 20 | K      | 1  | 147.1128        | 74.0600         | 49.7091         |

# Annotated spectra from Saleem et. al. 2009

K.AFDSS<sub>167</sub>NVSS<sub>167</sub>SK<sub>136</sub>DLLQMLR<sub>166</sub>N/3

0.9601

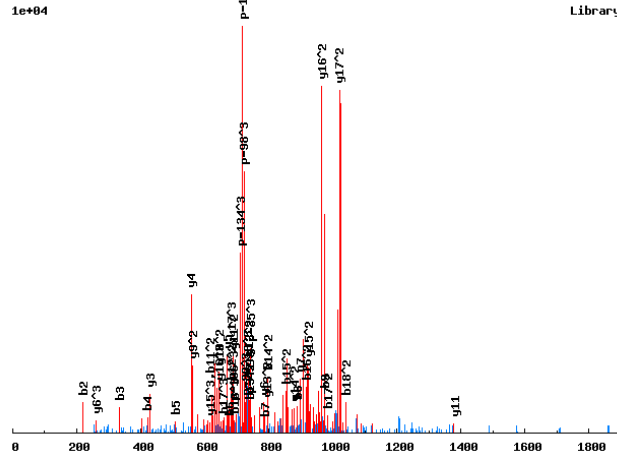

| Library | b <sup>1+</sup> | b <sup>2+</sup>  | b <sup>3+</sup> | #  | AA     | #  | y <sup>1+</sup>  | y <sup>2+</sup>  | y <sup>3+</sup> |
|---------|-----------------|------------------|-----------------|----|--------|----|------------------|------------------|-----------------|
|         | 72.0444         | 36.5258          | 24.6863         | 1  | A      | 19 |                  |                  |                 |
|         | <b>219.1128</b> | 110.0600         | 73.7091         | 2  | F      | 18 | 2191.9461        | 1096.4767        | <b>731.3202</b> |
|         | <b>334.1397</b> | 167.5735         | 112.0514        | 3  | D      | 17 | 2044.8777        | <b>1022.9425</b> | <b>682.2974</b> |
|         | <b>421.1718</b> | 211.0895         | 141.0621        | 4  | S      | 16 | 1929.8507        | <b>965.4290</b>  | <b>643.9551</b> |
|         | <b>508.2038</b> | 254.6055         | 170.0728        | 5  | S      | 15 | 1842.8187        | <b>921.9130</b>  | <b>614.9444</b> |
|         | <b>675.2022</b> | 338.1047         | 225.7389        | 6  | S[167] | 14 | 1755.7867        | <b>878.3970</b>  | 585.9338        |
|         | <b>789.2451</b> | 395.1262         | 263.7532        | 7  | N      | 13 | 1588.7883        | <b>794.8978</b>  | 530.2676        |
|         | <b>888.3135</b> | 444.6604         | 296.7760        | 8  | V      | 12 | 1474.7454        | <b>737.8763</b>  | 492.2533        |
|         | <b>975.3455</b> | 488.1764         | 325.7867        | 9  | S      | 11 | <b>1375.6770</b> | <b>688.3421</b>  | 459.2305        |
|         | 1142.3439       | 571.6756         | 381.4528        | 10 | S[167] | 10 | 1288.6450        | <b>644.8261</b>  | 430.2198        |
|         | 1229.3759       | <b>615.1916</b>  | 410.4635        | 11 | S      | 9  | 1121.6466        | <b>561.3269</b>  | 374.5537        |
|         | 1365.4851       | <b>683.2462</b>  | 455.8332        | 12 | K[136] | 8  | 1034.6146        | 517.8109         | 345.5430        |
|         | 1480.5120       | <b>740.7597</b>  | 494.1755        | 13 | D      | 7  | <b>898.5054</b>  | 449.7563         | 300.1733        |
|         | 1593.5961       | <b>797.3017</b>  | 531.8702        | 14 | L      | 6  | <b>783.4785</b>  | 392.2429         | <b>261.8310</b> |
|         | 1706.6801       | <b>853.8437</b>  | 569.5649        | 15 | L      | 5  | <b>670.3944</b>  | 335.7008         | 224.1363        |
|         | 1834.7387       | <b>917.8730</b>  | 612.2511        | 16 | Q      | 4  | <b>557.3103</b>  | 279.1588         | 186.4416        |
|         | 1965.7792       | <b>983.3932</b>  | <b>655.9313</b> | 17 | M      | 3  | <b>429.2518</b>  | 215.1295         | 143.7554        |
|         | 2078.8633       | <b>1039.9353</b> | <b>693.6259</b> | 18 | L      | 2  | 298.2113         | 149.6093         | 100.0753        |
|         |                 |                  |                 | 19 | R[166] | 1  | 185.1272         | 93.0672          | 62.3806         |



# Annotated spectra from Saleem et. al. 2009

K.AFS<sub>167</sub>IIPS<sub>167</sub>QR<sub>166</sub>F/2

0.8312

1e+04

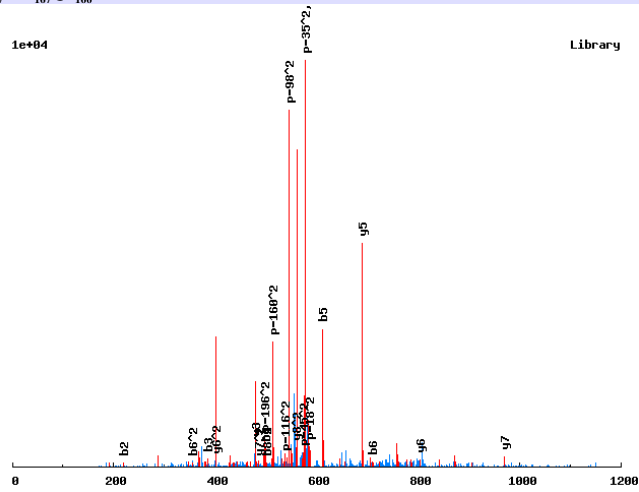

Library

| b <sup>1+</sup> | b <sup>2+</sup> | # | AA      | # | y <sup>1+</sup> | y <sup>2+</sup> |
|-----------------|-----------------|---|---------|---|-----------------|-----------------|
| 72.0444         | 36.5258         | 1 | A       | 9 |                 |                 |
| 219.1128        | 110.0600        | 2 | F       | 8 | 1117.4718       | 559.2395        |
| 386.1112        | 193.5592        | 3 | S [167] | 7 | 970.4034        | 485.7053        |
| 499.1952        | 250.1013        | 4 | I       | 6 | 803.4050        | 402.2062        |
| 612.2793        | 306.6433        | 5 | I       | 5 | 690.3210        | 345.6641        |
| 709.3320        | 355.1697        | 6 | P       | 4 | 577.2369        | 289.1221        |
| 876.3304        | 438.6688        | 7 | S [167] | 3 | 480.1842        | 240.5957        |
| 1004.3890       | 502.6981        | 8 | Q       | 2 | 313.1858        | 157.0965        |
|                 |                 | 9 | R [166] | 1 | 185.1272        | 93.0672         |

# Annotated spectra from Saleem et. al. 2009

R.AFS<sub>167</sub>SSSET<sub>181</sub>VPLSK<sub>136</sub>E/2

0.9495

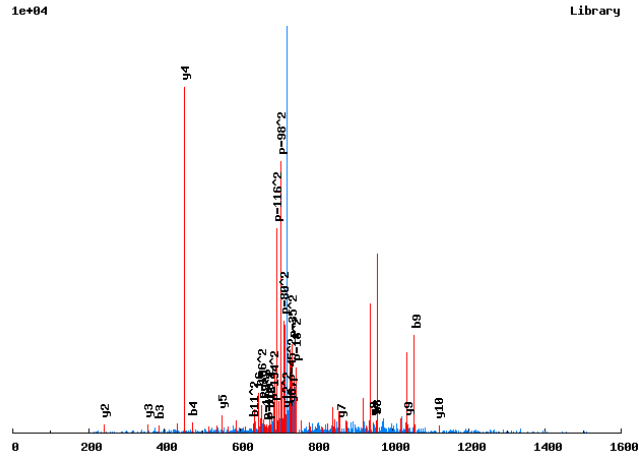

| Library | b <sup>1+</sup> | b <sup>2+</sup> | #  | AA     | #  | y <sup>1+</sup> | y <sup>2+</sup> |
|---------|-----------------|-----------------|----|--------|----|-----------------|-----------------|
|         | 72.0444         | 36.5258         | 1  | A      | 13 |                 |                 |
|         | 219.1128        | 110.0600        | 2  | F      | 12 | 1436.5837       | 718.7955        |
|         | 386.1112        | 193.5592        | 3  | S[167] | 11 | 1289.5153       | 645.2613        |
|         | 473.1432        | 237.0752        | 4  | S      | 10 | 1122.5169       | 561.7621        |
|         | 560.1752        | 280.5913        | 5  | S      | 9  | 1035.4849       | 518.2461        |
|         | 647.2073        | 324.1073        | 6  | S      | 8  | 948.4529        | 474.7301        |
|         | 776.2498        | 388.6286        | 7  | E      | 7  | 861.4209        | 431.2141        |
|         | 957.2639        | 479.1356        | 8  | T[181] | 6  | 732.3783        | 366.6928        |
|         | 1056.3323       | 528.6698        | 9  | V      | 5  | 551.3643        | 276.1858        |
|         | 1153.3850       | 577.1962        | 10 | P      | 4  | 452.2958        | 226.6516        |
|         | 1266.4691       | 633.7382        | 11 | L      | 3  | 355.2431        | 178.1252        |
|         | 1353.5011       | 677.2542        | 12 | S      | 2  | 242.1590        | 121.5832        |
|         |                 |                 | 13 | K[136] | 1  | 155.1270        | 78.0671         |

# Annotated spectra from Saleem et. al. 2009

K.AGLDNVDAES<sub>167</sub>.K.E/2

0.994

1e+04

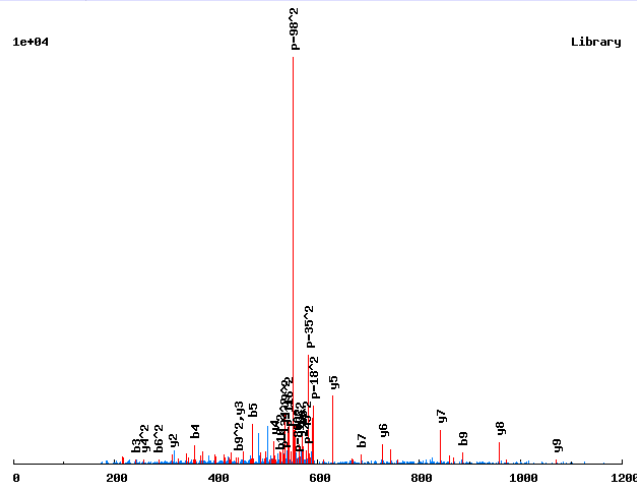

| Library | b <sup>1+</sup> | b <sup>2+</sup> | #  | AA      | #  | y <sup>1+</sup> | y <sup>2+</sup> |
|---------|-----------------|-----------------|----|---------|----|-----------------|-----------------|
|         | 72.0444         | 36.5258         | 1  | A       | 11 |                 |                 |
|         | 129.0659        | 65.0366         | 2  | G       | 10 | 1127.4616       | 564.2344        |
|         | 242.1499        | 121.5786        | 3  | L       | 9  | 1070.4401       | 535.7237        |
|         | 357.1769        | 179.0921        | 4  | D       | 8  | 957.3561        | 479.1817        |
|         | 471.2198        | 236.1135        | 5  | N       | 7  | 842.3291        | 421.6682        |
|         | 570.2882        | 285.6477        | 6  | V       | 6  | 728.2862        | 364.6467        |
|         | 685.3151        | 343.1612        | 7  | D       | 5  | 629.2178        | 315.1125        |
|         | 756.3522        | 378.6798        | 8  | A       | 4  | 514.1909        | 257.5991        |
|         | 885.3948        | 443.2011        | 9  | E       | 3  | 443.1538        | 222.0805        |
|         | 1052.3932       | 526.7002        | 10 | S [167] | 2  | 314.1112        | 157.5592        |
|         |                 |                 | 11 | K       | 1  | 147.1128        | 74.0600         |

# Annotated spectra from Saleem et. al. 2009

K.AGLDNVDAESKEGT<sub>181</sub>PS<sub>167</sub>ANSSIQEVLPSYSELLSR.F/3

0.9995

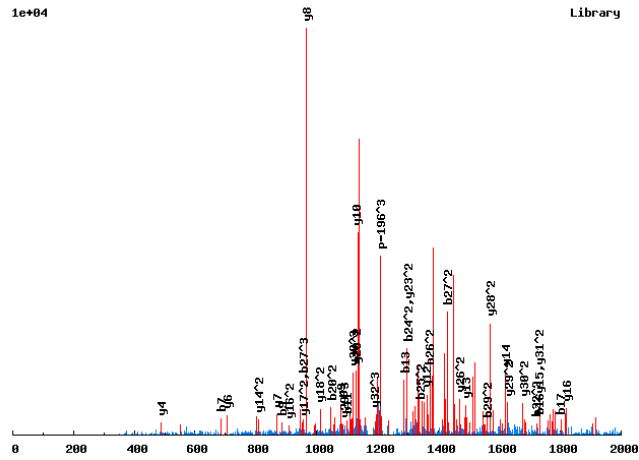

| Library | b <sup>1+</sup> | b <sup>2+</sup> | b <sup>3+</sup> | #  | AA     | #  | y <sup>1+</sup> | y <sup>2+</sup> | y <sup>3+</sup> |
|---------|-----------------|-----------------|-----------------|----|--------|----|-----------------|-----------------|-----------------|
|         | 72.0444         | 36.5258         | 24.6863         | 1  | A      | 35 |                 |                 |                 |
|         | 129.0659        | 65.0366         | 43.6935         | 2  | G      | 34 | 3750.6783       | 1875.8428       | 1250.8976       |
|         | 242.1499        | 121.5786        | 81.3882         | 3  | L      | 33 | 3693.6568       | 1847.3320       | 1231.8905       |
|         | 357.1769        | 179.0921        | 119.7305        | 4  | D      | 32 | 3580.5727       | 1790.7900       | 1194.1958       |
|         | 471.2198        | 236.1135        | 157.7448        | 5  | N      | 31 | 3465.5458       | 1733.2765       | 1155.8535       |
|         | 570.2882        | 285.6477        | 190.7676        | 6  | V      | 30 | 3351.5029       | 1676.2551       | 1117.8391       |
|         | 685.3151        | 343.1612        | 229.1099        | 7  | D      | 29 | 3252.4345       | 1626.7209       | 1084.8163       |
|         | 756.3522        | 378.6798        | 252.7889        | 8  | A      | 28 | 3137.4075       | 1569.2074       | 1046.4740       |
|         | 885.3948        | 443.2011        | 295.8031        | 9  | E      | 27 | 3066.3704       | 1533.6888       | 1022.7950       |
|         | 972.4269        | 486.7171        | 324.8138        | 10 | S      | 26 | 2937.3278       | 1469.1676       | 979.7808        |
|         | 1100.5218       | 550.7645        | 367.5121        | 11 | K      | 25 | 2850.2958       | 1425.6515       | 950.7701        |
|         | 1229.5644       | 615.2858        | 410.5263        | 12 | E      | 24 | 2722.2008       | 1361.6041       | 908.0718        |
|         | 1286.5859       | 643.7966        | 429.5335        | 13 | G      | 23 | 2593.1582       | 1297.0828       | 865.0576        |
|         | 1467.5999       | 734.3036        | 489.8715        | 14 | T[181] | 22 | 2536.1368       | 1268.5720       | 846.0504        |
|         | 1564.6526       | 782.8300        | 522.2224        | 15 | P      | 21 | 2355.1228       | 1178.0650       | 785.7124        |
|         | 1731.6510       | 866.3291        | 577.8885        | 16 | S[167] | 20 | 2258.0700       | 1129.5386       | 753.3615        |
|         | 1802.6881       | 901.8477        | 601.5676        | 17 | A      | 19 | 2091.0716       | 1046.0395       | 697.6954        |
|         | 1916.7310       | 958.8692        | 639.5819        | 18 | N      | 18 | 2020.0345       | 1010.5209       | 674.0164        |
|         | 2003.7631       | 1002.3852       | 668.5925        | 19 | S      | 17 | 1905.9916       | 953.4994        | 636.0021        |
|         | 2090.7951       | 1045.9012       | 697.6032        | 20 | S      | 16 | 1818.9596       | 909.9834        | 606.9914        |
|         | 2203.8792       | 1102.4432       | 735.2979        | 21 | I      | 15 | 1731.9276       | 866.4674        | 577.9807        |
|         | 2331.9377       | 1166.4725       | 777.9841        | 22 | Q      | 14 | 1618.8435       | 809.9254        | 540.2860        |
|         | 2459.9963       | 1230.5018       | 820.6703        | 23 | Q      | 13 | 1490.7849       | 745.8961        | 497.5998        |
|         | 2589.0389       | 1295.0231       | 863.6845        | 24 | E      | 12 | 1362.7263       | 681.8668        | 454.9136        |
|         | 2688.1073       | 1344.5573       | 896.7073        | 25 | V      | 11 | 1233.6837       | 617.3455        | 411.8994        |
|         | 2745.1288       | 1373.0680       | 915.7144        | 26 | G      | 10 | 1134.6153       | 567.8113        | 378.8766        |
|         | 2858.2128       | 1429.6101       | 953.4091        | 27 | L      | 9  | 1077.5939       | 539.3006        | 359.8695        |
|         | 2955.2656       | 1478.1364       | 985.7601        | 28 | P      | 8  | 964.5098        | 482.7585        | 322.1748        |
|         | 3118.3289       | 1559.6681       | 1040.1145       | 29 | Y      | 7  | 867.4571        | 434.2322        | 289.8239        |
|         | 3205.3610       | 1603.1841       | 1069.1252       | 30 | S      | 6  | 704.3937        | 352.7005        | 235.4694        |
|         | 3334.4036       | 1667.7054       | 1112.1394       | 31 | E      | 5  | 617.3617        | 309.1845        | 206.4588        |
|         | 3447.4876       | 1724.2474       | 1149.8341       | 32 | L      | 4  | 488.3191        | 244.6632        | 163.4446        |
|         | 3560.5717       | 1780.7895       | 1187.5287       | 33 | L      | 3  | 375.2350        | 188.1212        | 125.7499        |
|         | 3647.6037       | 1824.3055       | 1216.5394       | 34 | S      | 2  | 262.1510        | 131.5791        | 88.0552         |
|         |                 |                 |                 | 35 | R      | 1  | 175.1190        | 88.0631         | 59.0445         |

# Annotated spectra from Saleem et. al. 2009

R.AGNRP TSAAT<sub>181</sub>S<sub>167</sub>LVNR.T/2

0.9996

1e+04

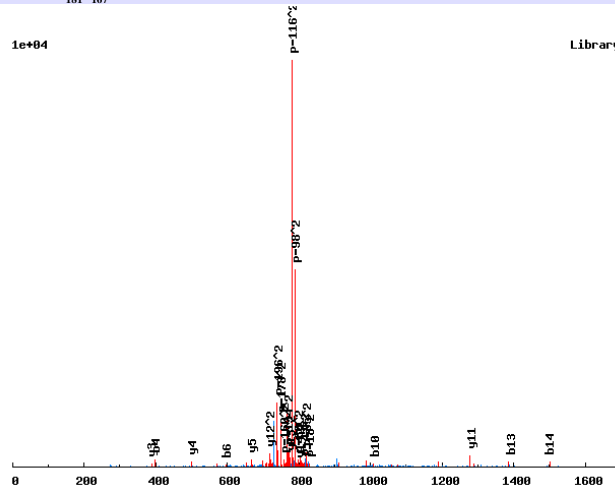

| Library | b <sup>1+</sup> | b <sup>2+</sup> | #  | AA     | #  | y <sup>1+</sup> | y <sup>2+</sup> |
|---------|-----------------|-----------------|----|--------|----|-----------------|-----------------|
|         | 72.0444         | 36.5258         | 1  | A      | 15 |                 |                 |
|         | 129.0659        | 65.0366         | 2  | G      | 14 | 1603.6989       | 802.3531        |
|         | 243.1088        | 122.0580        | 3  | N      | 13 | 1546.6775       | 773.8424        |
|         | 399.2099        | 200.1086        | 4  | R      | 12 | 1432.6345       | 716.8209        |
|         | 496.2626        | 248.6350        | 5  | P      | 11 | 1276.5334       | 638.7703        |
|         | 597.3103        | 299.1588        | 6  | T      | 10 | 1179.4807       | 590.2440        |
|         | 684.3424        | 342.6748        | 7  | S      | 9  | 1078.4330       | 539.7201        |
|         | 755.3795        | 378.1934        | 8  | A      | 8  | 991.4009        | 496.2041        |
|         | 826.4166        | 413.7119        | 9  | A      | 7  | 920.3638        | 460.6856        |
|         | 1007.4306       | 504.2189        | 10 | T[181] | 6  | 849.3267        | 425.1670        |
|         | 1174.4290       | 587.7181        | 11 | S[167] | 5  | 668.3127        | 334.6600        |
|         | 1287.5130       | 644.2601        | 12 | L      | 4  | 501.3143        | 251.1608        |
|         | 1386.5814       | 693.7944        | 13 | V      | 3  | 388.2303        | 194.6188        |
|         | 1500.6244       | 750.8158        | 14 | N      | 2  | 289.1619        | 145.0846        |
|         |                 |                 | 15 | R      | 1  | 175.1190        | 88.0631         |

# Annotated spectra from Saleem et. al. 2009

R.AGS<sub>167</sub>FLSSS<sub>167</sub>FR.H/2

0.6223

1e+04

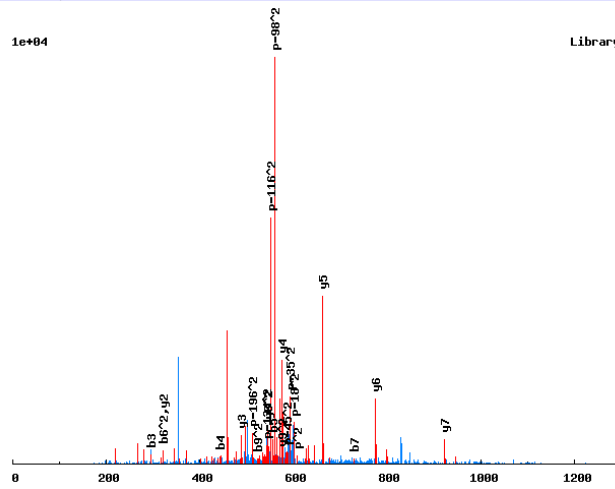

| Library | b <sup>1+</sup> | b <sup>2+</sup> | #  | AA     | #  | y <sup>1+</sup> | y <sup>2+</sup> |
|---------|-----------------|-----------------|----|--------|----|-----------------|-----------------|
|         | 72.0444         | 36.5258         | 1  | A      | 10 |                 |                 |
|         | 129.0659        | 65.0366         | 2  | G      | 9  | 1147.4221       | 574.2147        |
|         | 296.0642        | 148.5357        | 3  | S[167] | 8  | 1090.4006       | 545.7039        |
|         | 443.1326        | 222.0700        | 4  | F      | 7  | 923.4023        | 462.2048        |
|         | 556.2167        | 278.6120        | 5  | L      | 6  | 776.3338        | 388.6706        |
|         | 643.2487        | 322.1280        | 6  | S      | 5  | 663.2498        | 332.1285        |
|         | 730.2807        | 365.6440        | 7  | S      | 4  | 576.2178        | 288.6125        |
|         | 897.2791        | 449.1432        | 8  | S[167] | 3  | 489.1857        | 245.0965        |
|         | 1044.3475       | 522.6774        | 9  | F      | 2  | 322.1874        | 161.5973        |
|         |                 |                 | 10 | R      | 1  | 175.1190        | 88.0631         |

# Annotated spectra from Saleem et. al. 2009

R.AHSIS<sub>167</sub>HVPGTHM<sub>147</sub>R.G/4

0.6311

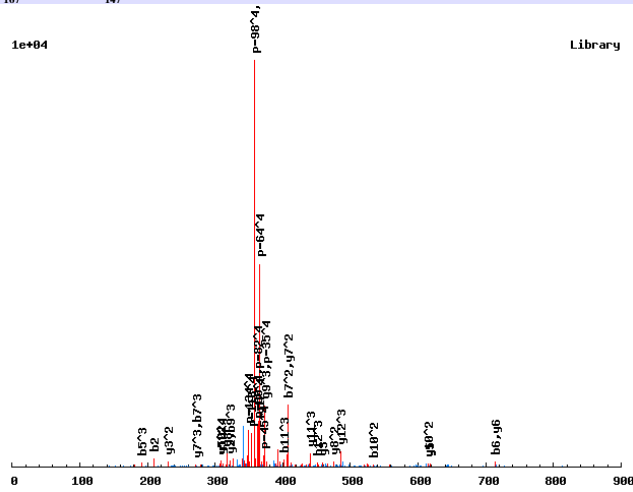

| Library | b <sup>1+</sup> | b <sup>2+</sup> | b <sup>3+</sup> | b <sup>4+</sup> | #  | AA     | #  | y <sup>1+</sup> | y <sup>2+</sup> | y <sup>3+</sup> | y <sup>4+</sup> |
|---------|-----------------|-----------------|-----------------|-----------------|----|--------|----|-----------------|-----------------|-----------------|-----------------|
|         | 72.0444         | 36.5258         | 24.6863         | 18.7666         | 1  | A      | 13 |                 |                 |                 |                 |
|         | <b>209.1033</b> | 105.0553        | 70.3726         | 53.0313         | 2  | H      | 12 | 1454.6358       | 727.8216        | <b>485.5501</b> | <b>364.4144</b> |
|         | 296.1353        | 148.5713        | 99.3833         | 74.7893         | 3  | S      | 11 | 1317.5769       | 659.2921        | <b>439.8638</b> | 330.1497        |
|         | 409.2194        | 205.1133        | 137.0780        | 103.0603        | 4  | I      | 10 | 1230.5449       | <b>615.7761</b> | 410.8532        | <b>308.3917</b> |
|         | 576.2178        | 288.6125        | <b>192.7441</b> | 144.8099        | 5  | S[167] | 9  | 1117.4608       | 559.2341        | <b>373.1585</b> | 280.1207        |
|         | <b>713.2767</b> | <b>357.1420</b> | 238.4304        | 179.0746        | 6  | H      | 8  | 950.4625        | <b>475.7349</b> | <b>317.4923</b> | 238.3711        |
|         | 812.3451        | <b>406.6762</b> | <b>271.4532</b> | 203.8417        | 7  | V      | 7  | 813.4036        | <b>407.2054</b> | <b>271.8060</b> | 204.1064        |
|         | 909.3978        | 455.2026        | 303.8041        | 228.1049        | 8  | P      | 6  | <b>714.3352</b> | <b>357.6712</b> | 238.7832        | 179.3393        |
|         | 966.4193        | 483.7133        | <b>322.8113</b> | 242.3603        | 9  | G      | 5  | <b>617.2824</b> | <b>309.1448</b> | 206.4323        | 155.0761        |
|         | 1067.4670       | <b>534.2371</b> | 356.4938        | 267.6222        | 10 | T      | 4  | 560.2609        | 280.6341        | 187.4252        | 140.8207        |
|         | 1204.5259       | 602.7666        | <b>402.1801</b> | 301.8869        | 11 | H      | 3  | <b>459.2133</b> | <b>230.1103</b> | 153.7426        | 115.5588        |
|         | 1351.5613       | 676.2843        | <b>451.1919</b> | 338.6458        | 12 | M[147] | 2  | <b>322.1544</b> | 161.5808        | 108.0563        | 81.2940         |
|         |                 |                 |                 |                 | 13 | R      | 1  | 175.1190        | 88.0631         | 59.0445         | 44.5352         |

# Annotated spectra from Saleem et. al. 2009

K.AHS<sub>167</sub>-PQTDLKDDHDESTPDPQSK.S/4

0.6111

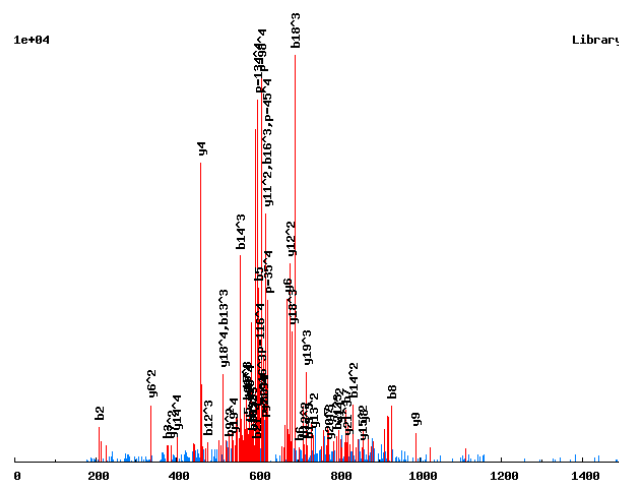

| Library | b <sup>1+</sup> | b <sup>2+</sup> | b <sup>3+</sup> | b <sup>4+</sup> | #  | AA     | #  | y <sup>1+</sup> | y <sup>2+</sup> | y <sup>3+</sup> | y <sup>4+</sup> |
|---------|-----------------|-----------------|-----------------|-----------------|----|--------|----|-----------------|-----------------|-----------------|-----------------|
|         | 72.0444         | 36.5258         | 24.6863         | 18.7666         | 1  | A      | 22 |                 |                 |                 |                 |
|         | 209.1033        | 105.0553        | 70.3726         | 53.0313         | 2  | H      | 21 | 2457.0202       | 1229.0137       | 819.6782        | 615.0105        |
|         | 376.1017        | 188.5545        | 126.0387        | 94.7809         | 3  | S[167] | 20 | 2319.9612       | 1160.4843       | 773.9919        | 580.7458        |
|         | 473.1544        | 237.0809        | 158.3897        | 119.0441        | 4  | P      | 19 | 2152.9629       | 1076.9851       | 718.3258        | 538.9962        |
|         | 601.2130        | 301.1101        | 201.0759        | 151.0587        | 5  | Q      | 18 | 2055.9101       | 1028.4587       | 685.9749        | 514.7330        |
|         | 702.2607        | 351.6340        | 234.7584        | 176.3206        | 6  | T      | 17 | 1927.8515       | 964.4294        | 643.2887        | 482.7183        |
|         | 817.2876        | 409.1475        | 273.1007        | 205.0774        | 7  | D      | 16 | 1826.8039       | 913.9056        | 609.6061        | 457.4564        |
|         | 930.3717        | 465.6895        | 310.7954        | 233.3484        | 8  | L      | 15 | 1711.7769       | 856.3921        | 571.2638        | 428.6997        |
|         | 1058.4666       | 529.7370        | 353.4937        | 265.3721        | 9  | K      | 14 | 1598.6929       | 799.8501        | 533.5691        | 400.4287        |
|         | 1173.4936       | 587.2504        | 391.8360        | 294.1289        | 10 | D      | 13 | 1470.5979       | 735.8026        | 490.8708        | 368.4049        |
|         | 1288.5205       | 644.7639        | 430.1784        | 322.8856        | 11 | D      | 12 | 1355.5710       | 678.2891        | 452.5285        | 339.6482        |
|         | 1425.5794       | 713.2934        | 475.8647        | 357.1503        | 12 | H      | 11 | 1240.5440       | 620.7756        | 414.1862        | 310.8915        |
|         | 1540.6064       | 770.8068        | 514.2070        | 385.9071        | 13 | D      | 10 | 1103.4851       | 552.2462        | 368.4999        | 276.6267        |
|         | 1669.6490       | 835.3281        | 557.2212        | 418.1677        | 14 | E      | 9  | 988.4582        | 494.7327        | 330.1576        | 247.8700        |
|         | 1756.6810       | 878.8441        | 586.2319        | 439.9257        | 15 | S      | 8  | 859.4156        | 430.2114        | 287.1434        | 215.6094        |
|         | 1857.7287       | 929.3680        | 619.9144        | 465.1876        | 16 | T      | 7  | 772.3836        | 386.6954        | 258.1327        | 193.8513        |
|         | 1954.7814       | 977.8944        | 652.2653        | 489.4508        | 17 | P      | 6  | 671.3359        | 336.1716        | 224.4501        | 168.5894        |
|         | 2069.8084       | 1035.4078       | 690.6076        | 518.2076        | 18 | D      | 5  | 574.2831        | 287.6452        | 192.0992        | 144.3262        |
|         | 2166.8611       | 1083.9342       | 722.9586        | 542.4707        | 19 | P      | 4  | 459.2562        | 230.1317        | 153.7569        | 115.5695        |
|         | 2294.9197       | 1147.9635       | 765.6448        | 574.4854        | 20 | Q      | 3  | 362.2034        | 181.6053        | 121.4060        | 91.3063         |
|         | 2381.9517       | 1191.4795       | 794.6554        | 596.2434        | 21 | S      | 2  | 234.1448        | 117.5761        | 78.7198         | 59.2917         |
|         |                 |                 |                 |                 | 22 | K      | 1  | 147.1128        | 74.0600         | 49.7091         | 37.5337         |



# Annotated spectra from Saleem et. al. 2009

K.AHSTYSDHDMYAQYESPS<sub>167</sub>VDT<sub>181</sub>GAQMEK<sub>136</sub>S/3

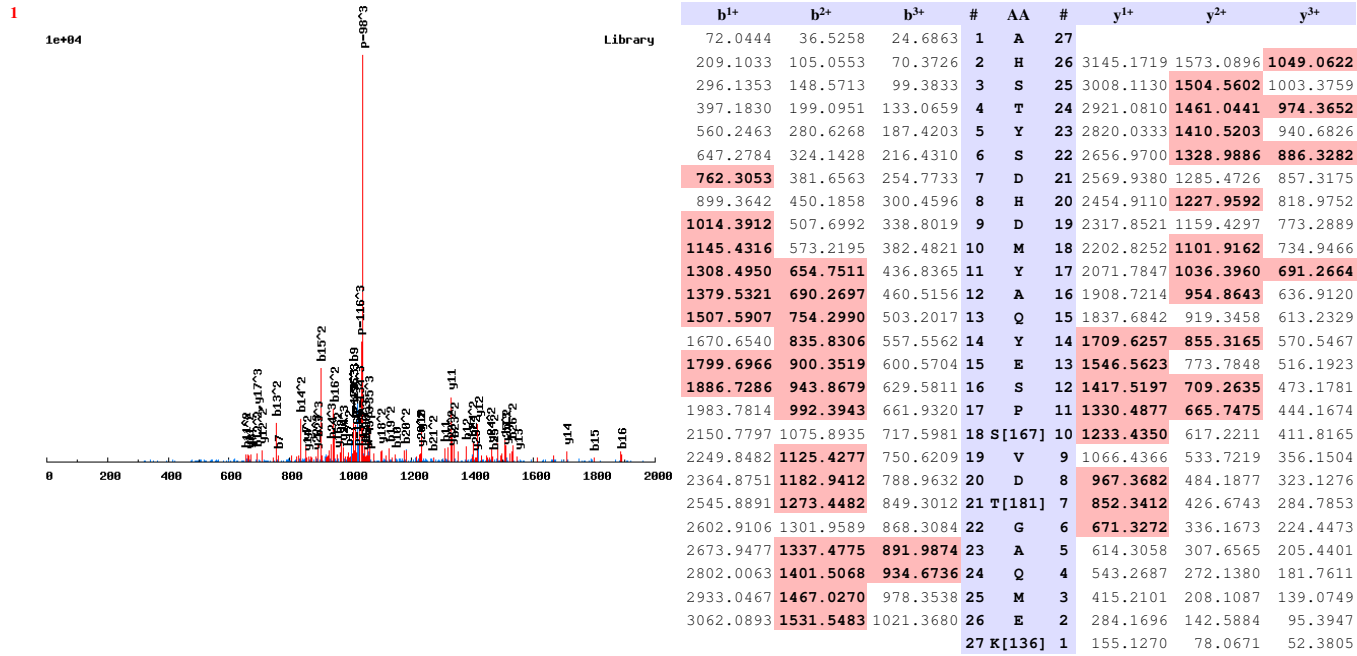

# Annotated spectra from Saleem et. al. 2009

R.AHVHEVAKST<sub>181</sub>PAAT<sub>181</sub>PAAT<sub>181</sub>PTPSSASPNNK.D/4

0.6053

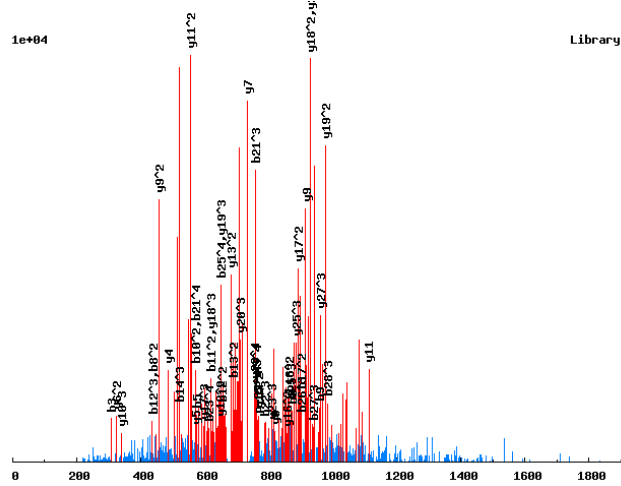

| Library | b <sup>1+</sup> | b <sup>2+</sup> | b <sup>3+</sup> | b <sup>4+</sup> | #  | AA     | #  | y <sup>1+</sup> | y <sup>2+</sup> | y <sup>3+</sup> | y <sup>4+</sup> |
|---------|-----------------|-----------------|-----------------|-----------------|----|--------|----|-----------------|-----------------|-----------------|-----------------|
|         | 72.0444         | 36.5258         | 24.6863         | 18.7666         | 1  | A      | 29 |                 |                 |                 |                 |
|         | 209.1033        | 105.0553        | 70.3726         | 53.0313         | 2  | H      | 28 | 3022.3472       | 1511.6772       | 1008.1206       | 756.3423        |
|         | 308.1717        | 154.5895        | 103.3954        | 77.7984         | 3  | V      | 27 | 2885.2883       | 1443.1478       | 962.4343        | 722.0775        |
|         | 445.2306        | 223.1189        | 149.0817        | 112.0631        | 4  | H      | 26 | 2786.2199       | 1393.6136       | 929.4115        | 697.3104        |
|         | 574.2732        | 287.6402        | 192.0959        | 144.3238        | 5  | E      | 25 | 2649.1609       | 1325.0841       | 883.7252        | 663.0457        |
|         | 673.3416        | 337.1745        | 225.1187        | 169.0909        | 6  | V      | 24 | 2520.1184       | 1260.5628       | 840.7110        | 630.7850        |
|         | 744.3787        | 372.6930        | 248.7978        | 186.8501        | 7  | A      | 23 | 2421.0499       | 1211.0286       | 807.6882        | 606.0179        |
|         | 872.4737        | 436.7405        | 291.4961        | 218.8739        | 8  | K      | 22 | 2350.0128       | 1175.5101       | 784.0091        | 588.2587        |
|         | 959.5057        | 480.2565        | 320.5068        | 240.6319        | 9  | S      | 21 | 2221.9179       | 1111.4626       | 741.3108        | 556.2349        |
|         | 1140.5197       | 570.7635        | 380.8448        | 285.8854        | 10 | T[181] | 20 | 2134.8858       | 1067.9466       | 712.3001        | 534.4769        |
|         | 1237.5725       | 619.2899        | 413.1957        | 310.1486        | 11 | P      | 19 | 1953.8718       | 977.4396        | 651.9621        | 489.2234        |
|         | 1308.6096       | 654.8084        | 436.8747        | 327.9079        | 12 | A      | 18 | 1856.8191       | 928.9132        | 619.6112        | 464.9602        |
|         | 1379.6467       | 690.3270        | 460.5538        | 345.6671        | 13 | A      | 17 | 1785.7820       | 893.3946        | 595.9322        | 447.2010        |
|         | 1560.6607       | 780.8340        | 520.8918        | 390.9206        | 14 | T[181] | 16 | 1714.7449       | 857.8761        | 572.2531        | 429.4417        |
|         | 1657.7135       | 829.3604        | 553.2427        | 415.1838        | 15 | P      | 15 | 1533.7308       | 767.3691        | 511.9151        | 384.1882        |
|         | 1728.7506       | 864.8789        | 576.9217        | 432.9431        | 16 | A      | 14 | 1436.6781       | 718.8427        | 479.5642        | 359.9250        |
|         | 1799.7877       | 900.3975        | 600.6008        | 450.7024        | 17 | A      | 13 | 1365.6410       | 683.3241        | 455.8852        | 342.1657        |
|         | 1980.8017       | 990.9045        | 660.9388        | 495.9559        | 18 | T[181] | 12 | 1294.6039       | 647.8056        | 432.2061        | 324.4064        |
|         | 2077.8545       | 1039.4309       | 693.2897        | 520.2191        | 19 | P      | 11 | 1113.5898       | 557.2986        | 371.8681        | 279.1529        |
|         | 2178.9022       | 1089.9547       | 726.9722        | 545.4810        | 20 | T      | 10 | 1016.5371       | 508.7722        | 339.5172        | 254.8897        |
|         | 2275.9549       | 1138.4811       | 759.3232        | 569.7442        | 21 | P      | 9  | 915.4894        | 458.2483        | 305.8347        | 229.6278        |
|         | 2362.9869       | 1181.9971       | 788.3338        | 591.5022        | 22 | S      | 8  | 818.4367        | 409.7220        | 273.4837        | 205.3646        |
|         | 2450.0190       | 1225.5131       | 817.3445        | 613.2602        | 23 | S      | 7  | 731.4046        | 366.2060        | 244.4731        | 183.6066        |
|         | 2521.0561       | 1261.0317       | 841.0235        | 631.0195        | 24 | A      | 6  | 644.3726        | 322.6899        | 215.4624        | 161.8486        |
|         | 2608.0881       | 1304.5477       | 870.0342        | 652.7775        | 25 | S      | 5  | 573.3355        | 287.1714        | 191.7833        | 144.0893        |
|         | 2705.1409       | 1353.0741       | 902.3851        | 677.0407        | 26 | P      | 4  | 486.3034        | 243.6554        | 162.7727        | 122.3313        |
|         | 2819.1838       | 1410.0955       | 940.3995        | 705.5514        | 27 | N      | 3  | 389.2507        | 195.1290        | 130.4217        | 98.0681         |
|         | 2947.2788       | 1474.1430       | 983.0978        | 737.5752        | 28 | K      | 2  | 275.2078        | 138.1075        | 92.4074         | 69.5574         |
|         |                 |                 |                 |                 | 29 | K      | 1  | 147.1128        | 74.0600         | 49.7091         | 37.5337         |

# Annotated spectra from Saleem et. al. 2009

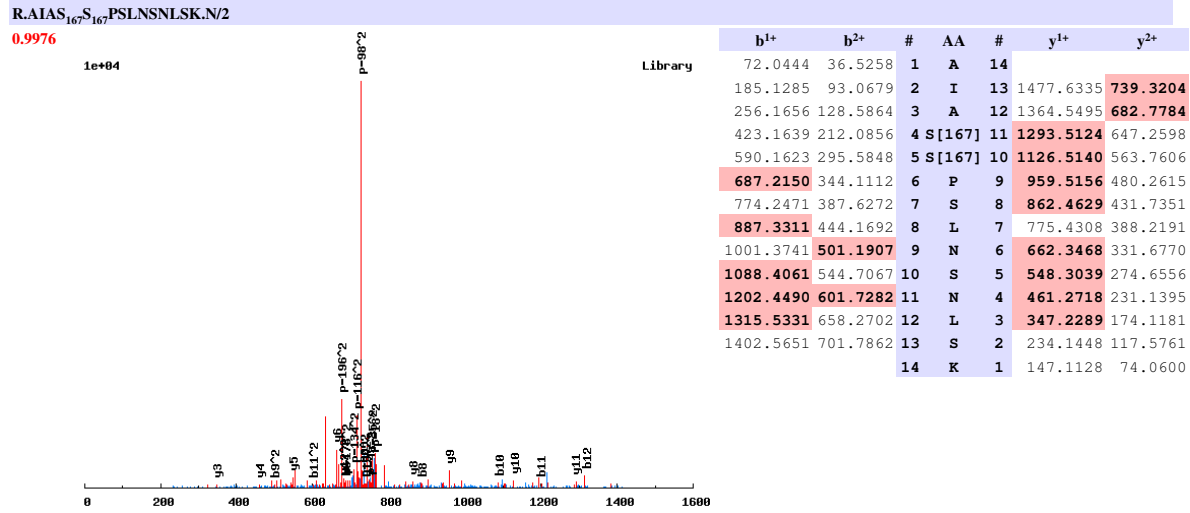

# Annotated spectra from Saleem et. al. 2009

R.AIHAS<sub>167</sub>PSTKS<sub>167</sub>IHK.S/3

0.7494

1e+04

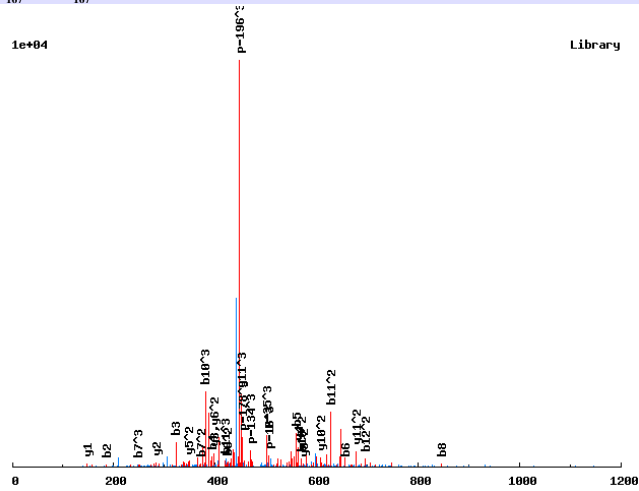

| Library | b <sup>1+</sup> | b <sup>2+</sup> | b <sup>3+</sup> | #  | AA     | #  | y <sup>1+</sup> | y <sup>2+</sup> | y <sup>3+</sup> |
|---------|-----------------|-----------------|-----------------|----|--------|----|-----------------|-----------------|-----------------|
|         | 72.0444         | 36.5258         | 24.6863         | 1  | A      | 13 |                 |                 |                 |
|         | 185.1285        | 93.0679         | 62.3810         | 2  | I      | 12 | 1465.6600       | 733.3336        | 489.2249        |
|         | 322.1874        | 161.5973        | 108.0673        | 3  | H      | 11 | 1352.5759       | 676.7916        | 451.5302        |
|         | 393.2245        | 197.1159        | 131.7463        | 4  | A      | 10 | 1215.5170       | 608.2622        | 405.8439        |
|         | 560.2228        | 280.6151        | 187.4125        | 5  | S[167] | 9  | 1144.4799       | 572.7436        | 382.1648        |
|         | 657.2756        | 329.1414        | 219.7634        | 6  | P      | 8  | 977.4816        | 489.2444        | 326.4987        |
|         | 744.3076        | 372.6575        | 248.7741        | 7  | S      | 7  | 880.4288        | 440.7180        | 294.1478        |
|         | 845.3553        | 423.1813        | 282.4566        | 8  | T      | 6  | 793.3968        | 397.2020        | 265.1371        |
|         | 973.4503        | 487.2288        | 325.1549        | 9  | K      | 5  | 692.3491        | 346.6782        | 231.4546        |
|         | 1140.4486       | 570.7280        | 380.8211        | 10 | S[167] | 4  | 564.2541        | 282.6307        | 188.7562        |
|         | 1253.5327       | 627.2700        | 418.5157        | 11 | I      | 3  | 397.2558        | 199.1315        | 133.0901        |
|         | 1390.5916       | 695.7994        | 464.2021        | 12 | H      | 2  | 284.1717        | 142.5895        | 95.3954         |
|         |                 |                 |                 | 13 | K      | 1  | 147.1128        | 74.0600         | 49.7091         |

# Annotated spectra from Saleem et. al. 2009

K.AINS<sub>167</sub>PIIR<sub>166</sub>PSSSNGVPT<sub>181</sub>TSR<sub>166</sub>-K/3

0.9975

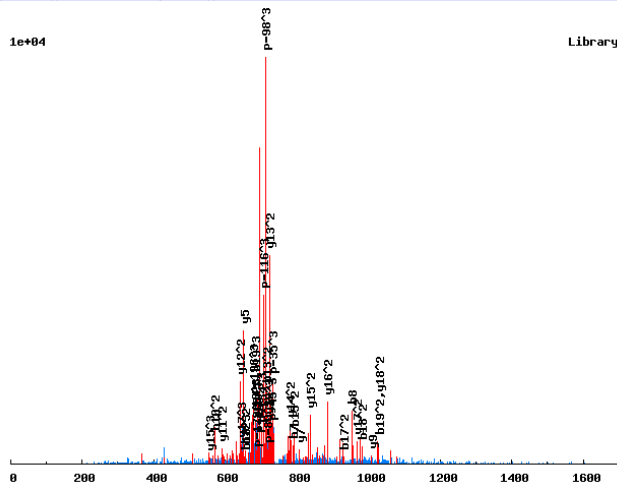

| Library | b <sup>1+</sup> | b <sup>2+</sup> | b <sup>3+</sup> | #  | AA     | #  | y <sup>1+</sup> | y <sup>2+</sup> | y <sup>3+</sup> |
|---------|-----------------|-----------------|-----------------|----|--------|----|-----------------|-----------------|-----------------|
|         | 72.0444         | 36.5258         | 24.6863         | 1  | A      | 20 |                 |                 |                 |
|         | 185.1285        | 93.0679         | 62.3810         | 2  | I      | 19 | 2163.0110       | 1082.0091       | 721.6752        |
|         | 299.1714        | 150.0893        | 100.3953        | 3  | N      | 18 | 2049.9269       | 1025.4671       | 683.9805        |
|         | 466.1697        | 233.5885        | 156.0614        | 4  | S[167] | 17 | 1935.8840       | 968.4456        | 645.9662        |
|         | 563.2225        | 282.1149        | 188.4124        | 5  | P      | 16 | 1768.8856       | 884.9464        | 590.3001        |
|         | 676.3066        | 338.6569        | 226.1070        | 6  | I      | 15 | 1671.8328       | 836.4201        | 557.9491        |
|         | 789.3906        | 395.1990        | 263.8017        | 7  | I      | 14 | 1558.7488       | 779.8780        | 520.2544        |
|         | 955.5000        | 478.2536        | 319.1715        | 8  | R[166] | 13 | 1445.6647       | 723.3360        | 482.5598        |
|         | 1052.5528       | 526.7800        | 351.5224        | 9  | P      | 12 | 1279.5554       | 640.2813        | 427.1900        |
|         | 1139.5848       | 570.2960        | 380.5331        | 10 | S      | 11 | 1182.5026       | 591.7549        | 394.8390        |
|         | 1226.6168       | 613.8121        | 409.5438        | 11 | S      | 10 | 1095.4706       | 548.2389        | 365.8284        |
|         | 1313.6489       | 657.3281        | 438.5545        | 12 | S      | 9  | 1008.4385       | 504.7229        | 336.8177        |
|         | 1427.6918       | 714.3495        | 476.5688        | 13 | N      | 8  | 921.4065        | 461.2069        | 307.8070        |
|         | 1484.7132       | 742.8603        | 495.5759        | 14 | G      | 7  | 807.3636        | 404.1854        | 269.7927        |
|         | 1583.7817       | 792.3945        | 528.5987        | 15 | V      | 6  | 750.3421        | 375.6747        | 250.7856        |
|         | 1680.8344       | 840.9208        | 560.9497        | 16 | P      | 5  | 651.2737        | 326.1405        | 217.7628        |
|         | 1861.8484       | 931.4279        | 621.2877        | 17 | T[181] | 4  | 554.2209        | 277.6141        | 185.4118        |
|         | 1962.8961       | 981.9517        | 654.9702        | 18 | T      | 3  | 373.2069        | 187.1071        | 125.0738        |
|         | 2049.9281       | 1025.4677       | 683.9809        | 19 | S      | 2  | 272.1592        | 136.5833        | 91.3913         |
|         |                 |                 |                 | 20 | R[166] | 1  | 185.1272        | 93.0672         | 62.3806         |

# Annotated spectra from Saleem et. al. 2009

K.AINTEHVGGLC<sub>160</sub>PKPGSS<sub>167</sub>QGS<sub>167</sub>NEYLK.R/3

0.9975

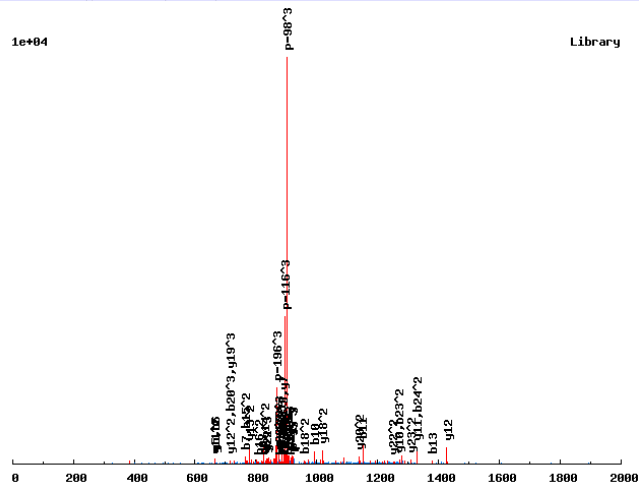

| Library | b <sup>1+</sup> | b <sup>2+</sup> | b <sup>3+</sup> | #  | AA     | #  | y <sup>1+</sup> | y <sup>2+</sup> | y <sup>3+</sup> |
|---------|-----------------|-----------------|-----------------|----|--------|----|-----------------|-----------------|-----------------|
|         | 72.0444         | 36.5258         | 24.6863         | 1  | A      | 25 |                 |                 |                 |
|         | 185.1285        | 93.0679         | 62.3810         | 2  | I      | 24 | 2732.1787       | 1366.5930       | 911.3977        |
|         | 299.1714        | 150.0893        | 100.3953        | 3  | N      | 23 | 2619.0946       | 1310.0509       | 873.7031        |
|         | 400.2191        | 200.6132        | 134.0779        | 4  | T      | 22 | 2505.0517       | 1253.0295       | 835.6887        |
|         | 529.2617        | 265.1345        | 177.0921        | 5  | E      | 21 | 2404.0040       | 1202.5056       | 802.0062        |
|         | 666.3206        | 333.6639        | 222.7784        | 6  | H      | 20 | 2274.9614       | 1137.9843       | 758.9920        |
|         | 765.3890        | 383.1981        | 255.8012        | 7  | V      | 19 | 2137.9025       | 1069.4549       | 713.3057        |
|         | 822.4104        | 411.7089        | 274.8083        | 8  | G      | 18 | 2038.8341       | 1019.9207       | 680.2829        |
|         | 879.4319        | 440.2196        | 293.8155        | 9  | G      | 17 | 1981.8126       | 991.4099        | 661.2757        |
|         | 992.5160        | 496.7616        | 331.5102        | 10 | L      | 16 | 1924.7912       | 962.8992        | 642.2686        |
|         | 1152.5466       | 576.7769        | 384.8537        | 11 | C[160] | 15 | 1811.7071       | 906.3572        | 604.5739        |
|         | 1249.5994       | 625.3033        | 417.2046        | 12 | P      | 14 | 1651.6764       | 826.3419        | 551.2303        |
|         | 1377.6943       | 689.3508        | 459.9030        | 13 | K      | 13 | 1554.6237       | 777.8155        | 518.8794        |
|         | 1474.7471       | 737.8772        | 492.2539        | 14 | P      | 12 | 1426.5287       | 713.7680        | 476.1811        |
|         | 1531.7685       | 766.3879        | 511.2610        | 15 | G      | 11 | 1329.4760       | 665.2416        | 443.8302        |
|         | 1618.8006       | 809.9039        | 540.2717        | 16 | S      | 10 | 1272.4545       | 636.7309        | 424.8230        |
|         | 1785.7989       | 893.4031        | 595.9378        | 17 | S[167] | 9  | 1185.4225       | 593.2149        | 395.8123        |
|         | 1913.8575       | 957.4324        | 638.6240        | 18 | Q      | 8  | 1018.4241       | 509.7157        | 340.1462        |
|         | 1970.8790       | 985.9431        | 657.6312        | 19 | G      | 7  | 890.3655        | 445.6864        | 297.4600        |
|         | 2137.8773       | 1069.4423       | 713.2973        | 20 | S[167] | 6  | 833.3441        | 417.1757        | 278.4529        |
|         | 2251.9203       | 1126.4638       | 751.3116        | 21 | N      | 5  | 666.3457        | 333.6765        | 222.7868        |
|         | 2380.9629       | 1190.9851       | 794.3258        | 22 | E      | 4  | 552.3028        | 276.6550        | 184.7724        |
|         | 2544.0262       | 1272.5167       | 848.6802        | 23 | Y      | 3  | 423.2602        | 212.1337        | 141.7582        |
|         | 2657.1102       | 1329.0588       | 886.3749        | 24 | L      | 2  | 260.1969        | 130.6021        | 87.4038         |
|         |                 |                 |                 | 25 | K      | 1  | 147.1128        | 74.0600         | 49.7091         |

# Annotated spectra from Saleem et. al. 2009

K.AIRS<sub>167</sub>GNEEES<sub>167</sub>GNEQVNHNDAAEEDPLLTR.Y/3

0.9998

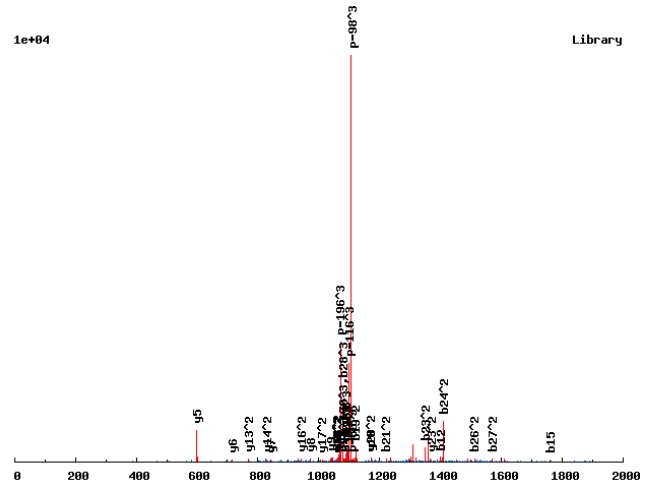

| Library | b <sup>1+</sup>  | b <sup>2+</sup>  | b <sup>3+</sup>  | #  | AA     | #  | y <sup>1+</sup>  | y <sup>2+</sup>  | y <sup>3+</sup>  |
|---------|------------------|------------------|------------------|----|--------|----|------------------|------------------|------------------|
|         | 72.0444          | 36.5258          | 24.6863          | 1  | A      | 29 |                  |                  |                  |
|         | 185.1285         | 93.0679          | 62.3810          | 2  | I      | 28 | 3341.3591        | 1671.1832        | 1114.4579        |
|         | 341.2296         | 171.1184         | 114.4147         | 3  | R      | 27 | 3228.2750        | 1614.6411        | <b>1076.7632</b> |
|         | 508.2279         | 254.6176         | 170.0808         | 4  | S[167] | 26 | 3072.1739        | 1536.5906        | 1024.7295        |
|         | 565.2494         | 283.1283         | 189.0880         | 5  | G      | 25 | 2905.1755        | 1453.0914        | 969.0634         |
|         | 679.2923         | 340.1498         | 227.1023         | 6  | N      | 24 | 2848.1541        | 1424.5807        | 950.0562         |
|         | 808.3349         | 404.6711         | 270.1165         | 7  | E      | 23 | 2734.1111        | <b>1367.5592</b> | 912.0419         |
|         | 937.3775         | 469.1924         | 313.1307         | 8  | E      | 22 | 2605.0686        | 1303.0379        | 869.0277         |
|         | <b>1066.4201</b> | 533.7137         | 356.1449         | 9  | E      | 21 | 2476.0260        | 1238.5166        | 826.0135         |
|         | 1233.4184        | 617.2129         | 411.8110         | 10 | S[167] | 20 | 2346.9834        | <b>1173.9953</b> | 782.9993         |
|         | 1290.4399        | 645.7236         | 430.8182         | 11 | G      | 19 | 2179.9850        | <b>1090.4961</b> | 727.3332         |
|         | <b>1404.4828</b> | 702.7451         | 468.8325         | 12 | N      | 18 | 2122.9635        | <b>1061.9854</b> | 708.3260         |
|         | 1533.5254        | 767.2664         | 511.8467         | 13 | E      | 17 | 2008.9206        | <b>1004.9639</b> | 670.3117         |
|         | 1661.5840        | 831.2956         | 554.5329         | 14 | Q      | 16 | 1879.8780        | <b>940.4427</b>  | 627.2975         |
|         | <b>1760.6524</b> | 880.8298         | 587.5557         | 15 | V      | 15 | 1751.8194        | 876.4134         | 584.6113         |
|         | 1874.6953        | 937.8513         | 625.5700         | 16 | N      | 14 | 1652.7510        | <b>826.8792</b>  | 551.5885         |
|         | 2011.7543        | 1006.3808        | 671.2563         | 17 | H      | 13 | 1538.7081        | <b>769.8577</b>  | 513.5742         |
|         | 2125.7972        | <b>1063.4022</b> | 709.2706         | 18 | N      | 12 | 1401.6492        | 701.3282         | 467.8879         |
|         | 2240.8241        | <b>1120.9157</b> | 747.6129         | 19 | D      | 11 | 1287.6063        | 644.3068         | 429.8736         |
|         | 2369.8667        | 1185.4370        | 790.6271         | 20 | E      | 10 | <b>1172.5793</b> | 586.7933         | 391.5313         |
|         | 2440.9038        | <b>1220.9556</b> | 814.3061         | 21 | A      | 9  | <b>1043.5367</b> | 522.2720         | 348.5171         |
|         | 2569.9464        | 1285.4768        | 857.3203         | 22 | E      | 8  | <b>972.4996</b>  | 486.7535         | 324.8381         |
|         | 2698.9890        | <b>1349.9981</b> | 900.3345         | 23 | E      | 7  | <b>843.4570</b>  | 422.2322         | 281.8239         |
|         | 2814.0159        | <b>1407.5116</b> | 938.6768         | 24 | D      | 6  | <b>714.4145</b>  | 357.7109         | 238.8097         |
|         | 2911.0687        | 1456.0380        | 971.0278         | 25 | P      | 5  | <b>599.3875</b>  | 300.1974         | 200.4674         |
|         | 3024.1528        | <b>1512.5800</b> | 1008.7224        | 26 | L      | 4  | 502.3347         | 251.6710         | 168.1164         |
|         | 3137.2368        | <b>1569.1221</b> | 1046.4171        | 27 | L      | 3  | 389.2507         | 195.1290         | 130.4217         |
|         | 3238.2845        | 1619.6459        | <b>1080.0997</b> | 28 | T      | 2  | 276.1666         | 138.5870         | 92.7271          |
|         |                  |                  |                  | 29 | R      | 1  | 175.1190         | 88.0631          | 59.0445          |

# Annotated spectra from Saleem et. al. 2009

R.AIS<sub>167</sub>ASRLT<sub>181</sub>AEEDER.R/3

0.7864

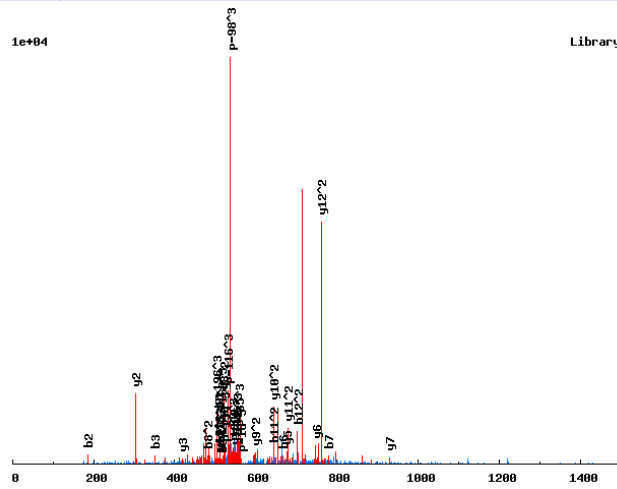

| Library | b <sup>1+</sup> | b <sup>2+</sup> | b <sup>3+</sup> | #  | AA     | #  | y <sup>1+</sup> | y <sup>2+</sup> | y <sup>3+</sup> |
|---------|-----------------|-----------------|-----------------|----|--------|----|-----------------|-----------------|-----------------|
|         | 72.0444         | 36.5258         | 24.6863         | 1  | A      | 14 |                 |                 |                 |
|         | 185.1285        | 93.0679         | 62.3810         | 2  | I      | 13 | 1636.6615       | 818.8344        | 546.2254        |
|         | 352.1268        | 176.5670        | 118.0471        | 3  | S[167] | 12 | 1523.5775       | 762.2924        | 508.5307        |
|         | 423.1639        | 212.0856        | 141.7262        | 4  | A      | 11 | 1356.5791       | 678.7932        | 452.8646        |
|         | 510.1960        | 255.6016        | 170.7368        | 5  | S      | 10 | 1285.5420       | 643.2746        | 429.1855        |
|         | 666.2971        | 333.6522        | 222.7705        | 6  | R      | 9  | 1198.5100       | 599.7586        | 400.1748        |
|         | 779.3811        | 390.1942        | 260.4652        | 7  | L      | 8  | 1042.4088       | 521.7081        | 348.1411        |
|         | 960.3951        | 480.7012        | 320.8032        | 8  | T[181] | 7  | 929.3248        | 465.1660        | 310.4464        |
|         | 1031.4322       | 516.2198        | 344.4823        | 9  | A      | 6  | 748.3108        | 374.6590        | 250.1084        |
|         | 1160.4748       | 580.7411        | 387.4965        | 10 | E      | 5  | 677.2737        | 339.1405        | 226.4294        |
|         | 1289.5174       | 645.2624        | 430.5107        | 11 | E      | 4  | 548.2311        | 274.6192        | 183.4152        |
|         | 1404.5444       | 702.7758        | 468.8530        | 12 | D      | 3  | 419.1885        | 210.0979        | 140.4010        |
|         | 1533.5870       | 767.2971        | 511.8672        | 13 | E      | 2  | 304.1615        | 152.5844        | 102.0587        |
|         |                 |                 |                 | 14 | R      | 1  | 175.1190        | 88.0631         | 59.0445         |



# Annotated spectra from Saleem et. al. 2009

K.AIS<sub>167</sub>EES<sub>167</sub>LSPSEAIANR<sub>166</sub>D/2

0.9999

1e+04

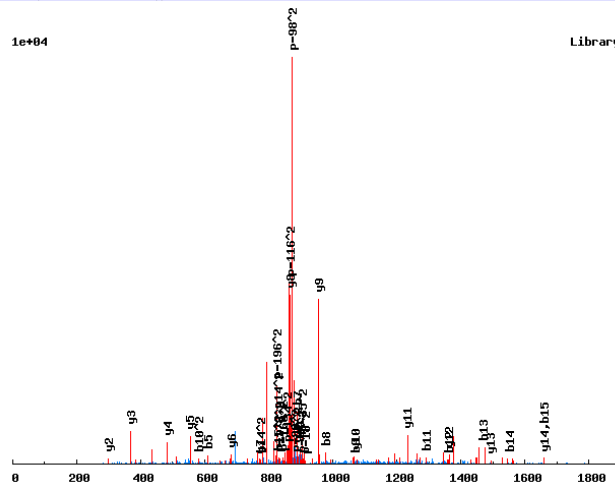

Library

| b <sup>1+</sup> | b <sup>2+</sup> | #  | AA     | #  | y <sup>1+</sup> | y <sup>2+</sup> |
|-----------------|-----------------|----|--------|----|-----------------|-----------------|
| 72.0444         | 36.5258         | 1  | A      | 16 |                 |                 |
| 185.1285        | 93.0679         | 2  | I      | 15 | 1772.7379       | 886.8726        |
| 352.1268        | 176.5670        | 3  | S[167] | 14 | 1659.6538       | 830.3305        |
| 481.1694        | 241.0883        | 4  | E      | 13 | 1492.6554       | 746.8314        |
| 610.2120        | 305.6096        | 5  | E      | 12 | 1363.6128       | 682.3101        |
| 777.2104        | 389.1088        | 6  | S[167] | 11 | 1234.5703       | 617.7888        |
| 890.2944        | 445.6508        | 7  | L      | 10 | 1067.5719       | 534.2896        |
| 977.3264        | 489.1669        | 8  | S      | 9  | 954.4878        | 477.7476        |
| 1074.3792       | 537.6932        | 9  | P      | 8  | 867.4558        | 434.2315        |
| 1161.4112       | 581.2093        | 10 | S      | 7  | 770.4030        | 385.7052        |
| 1290.4538       | 645.7306        | 11 | E      | 6  | 683.3710        | 342.1891        |
| 1361.4909       | 681.2491        | 12 | A      | 5  | 554.3284        | 277.6679        |
| 1474.5750       | 737.7911        | 13 | I      | 4  | 483.2913        | 242.1493        |
| 1545.6121       | 773.3097        | 14 | A      | 3  | 370.2073        | 185.6073        |
| 1659.6550       | 830.3312        | 15 | N      | 2  | 299.1701        | 150.0887        |
|                 |                 | 16 | R[166] | 1  | 185.1272        | 93.0672         |

# Annotated spectra from Saleem et. al. 2009

K.AIS<sub>167</sub>SDQLFGRGS<sub>167</sub>FDEAANRE/3

0.9995

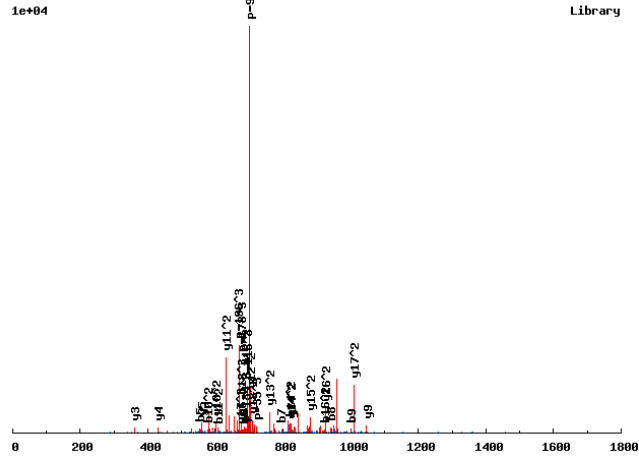

| Library | b <sup>1+</sup> | b <sup>2+</sup> | b <sup>3+</sup> | #  | AA     | #  | y <sup>1+</sup>  | y <sup>2+</sup>  | y <sup>3+</sup> |
|---------|-----------------|-----------------|-----------------|----|--------|----|------------------|------------------|-----------------|
|         | 72.0444         | 36.5258         | 24.6863         | 1  | A      | 19 |                  |                  |                 |
|         | 185.1285        | 93.0679         | 62.3810         | 2  | I      | 18 | 2129.8689        | 1065.4381        | <b>710.6278</b> |
|         | 352.1268        | 176.5670        | 118.0471        | 3  | S[167] | 17 | 2016.7848        | <b>1008.8960</b> | <b>672.9331</b> |
|         | 439.1588        | 220.0831        | 147.0578        | 4  | S      | 16 | 1849.7865        | <b>925.3969</b>  | 617.2670        |
|         | <b>554.1858</b> | 277.5965        | 185.4001        | 5  | D      | 15 | 1762.7544        | <b>881.8809</b>  | 588.2563        |
|         | <b>682.2444</b> | 341.6258        | 228.0863        | 6  | Q      | 14 | 1647.7275        | <b>824.3674</b>  | 549.9140        |
|         | <b>795.3284</b> | 398.1679        | 265.7810        | 7  | L      | 13 | 1519.6689        | <b>760.3381</b>  | 507.2278        |
|         | <b>942.3968</b> | 471.7021        | 314.8038        | 8  | F      | 12 | 1406.5848        | <b>703.7961</b>  | 469.5331        |
|         | <b>999.4183</b> | 500.2128        | 333.8110        | 9  | G      | 11 | 1259.5164        | <b>630.2619</b>  | 420.5103        |
|         | 1155.5194       | <b>578.2633</b> | 385.8447        | 10 | R      | 10 | 1202.4950        | <b>601.7511</b>  | 401.5032        |
|         | 1212.5409       | <b>606.7741</b> | 404.8518        | 11 | G      | 9  | <b>1046.3939</b> | 523.7006         | 349.4695        |
|         | 1379.5392       | <b>690.2733</b> | 460.5179        | 12 | S[167] | 8  | 989.3724         | 495.1898         | 330.4623        |
|         | 1526.6076       | 763.8075        | 509.5407        | 13 | F      | 7  | <b>822.3740</b>  | 411.6907         | 274.7962        |
|         | 1641.6346       | <b>821.3209</b> | 547.8830        | 14 | D      | 6  | <b>675.3056</b>  | 338.1565         | 225.7734        |
|         | 1770.6772       | 885.8422        | 590.8972        | 15 | E      | 5  | <b>560.2787</b>  | 280.6430         | 187.4311        |
|         | 1841.7143       | <b>921.3608</b> | 614.5763        | 16 | A      | 4  | <b>431.2361</b>  | 216.1217         | 144.4169        |
|         | 1912.7514       | 956.8793        | 638.2553        | 17 | A      | 3  | <b>360.1990</b>  | 180.6031         | 120.7378        |
|         | 2026.7943       | 1013.9008       | <b>676.2696</b> | 18 | N      | 2  | 289.1619         | 145.0846         | 97.0588         |
|         |                 |                 |                 | 19 | R      | 1  | 175.1190         | 88.0631          | 59.0445         |

# Annotated spectra from Saleem et. al. 2009

R.AIT<sub>181</sub>PSNEGVK<sub>136</sub>PNTSLEGMTS<sub>167</sub>SPMESTQSK<sub>136</sub>N/3

0.8702

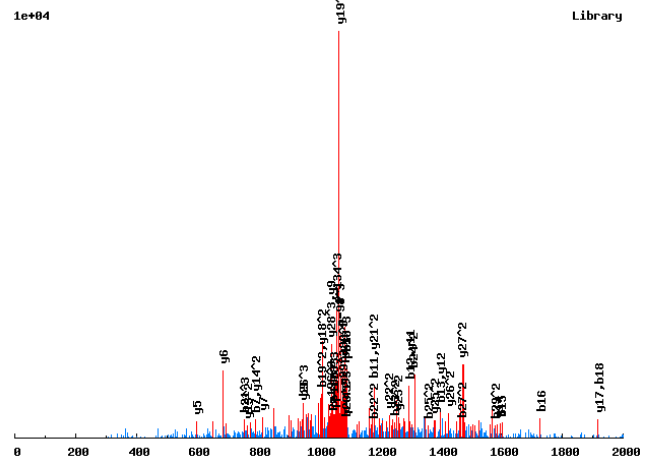

| Library | b <sup>1+</sup> | b <sup>2+</sup> | b <sup>3+</sup> | #  | AA      | #  | y <sup>1+</sup> | y <sup>2+</sup> | y <sup>3+</sup> |
|---------|-----------------|-----------------|-----------------|----|---------|----|-----------------|-----------------|-----------------|
|         | 72.0444         | 36.5258         | 24.6863         | 1  | A       | 30 |                 |                 |                 |
|         | 185.1285        | 93.0679         | 62.3810         | 2  | I       | 29 | 3241.4012       | 1621.2042       | 1081.1386       |
|         | 366.1425        | 183.5749        | 122.7190        | 3  | T [181] | 28 | 3128.3172       | 1564.6622       | 1043.4439       |
|         | 463.1952        | 232.1013        | 155.0699        | 4  | P       | 27 | 2947.3031       | 1474.1552       | 983.1059        |
|         | 550.2273        | 275.6173        | 184.0806        | 5  | S       | 26 | 2850.2504       | 1425.6288       | 950.7550        |
|         | 664.2702        | 332.6387        | 222.0949        | 6  | N       | 25 | 2763.2184       | 1382.1128       | 921.7443        |
|         | 793.3128        | 397.1600        | 265.1091        | 7  | E       | 24 | 2649.1754       | 1325.0914       | 883.7300        |
|         | 850.3342        | 425.6708        | 284.1163        | 8  | G       | 23 | 2520.1328       | 1260.5701       | 840.7158        |
|         | 949.4026        | 475.2050        | 317.1391        | 9  | V       | 22 | 2463.1114       | 1232.0593       | 821.7086        |
|         | 1085.5118       | 543.2595        | 362.5088        | 10 | K [136] | 21 | 2364.0430       | 1182.5251       | 788.6858        |
|         | 1182.5646       | 591.7859        | 394.8597        | 11 | P       | 20 | 2227.9338       | 1114.4705       | 743.3161        |
|         | 1296.6075       | 648.8074        | 432.8740        | 12 | N       | 19 | 2130.8811       | 1065.9442       | 710.9652        |
|         | 1397.6552       | 699.3312        | 466.5566        | 13 | T       | 18 | 2016.8381       | 1008.9227       | 672.9509        |
|         | 1484.6872       | 742.8472        | 495.5673        | 14 | S       | 17 | 1915.7904       | 958.3989        | 639.2683        |
|         | 1597.7713       | 799.3893        | 533.2619        | 15 | L       | 16 | 1828.7584       | 914.8828        | 610.2577        |
|         | 1726.8139       | 863.9106        | 576.2761        | 16 | E       | 15 | 1715.6743       | 858.3408        | 572.5630        |
|         | 1783.8353       | 892.4213        | 595.2833        | 17 | G       | 14 | 1586.6318       | 793.8195        | 529.5488        |
|         | 1914.8758       | 957.9415        | 638.9635        | 18 | M       | 13 | 1529.6103       | 765.3088        | 510.5416        |
|         | 2015.9235       | 1008.4654       | 672.6460        | 19 | T       | 12 | 1398.5698       | 699.7885        | 466.8615        |
|         | 2182.9218       | 1091.9646       | 728.3121        | 20 | S [167] | 11 | 1297.5221       | 649.2647        | 433.1789        |
|         | 2269.9539       | 1135.4806       | 757.3228        | 21 | S       | 10 | 1130.5238       | 565.7655        | 377.5128        |
|         | 2367.0066       | 1184.0070       | 789.6737        | 22 | P       | 9  | 1043.4917       | 522.2495        | 348.5021        |
|         | 2498.0471       | 1249.5272       | 833.3539        | 23 | M       | 8  | 946.4390        | 473.7231        | 316.1512        |
|         | 2627.0897       | 1314.0485       | 876.3681        | 24 | E       | 7  | 815.3985        | 408.2029        | 272.4710        |
|         | 2714.1217       | 1357.5645       | 905.3788        | 25 | S       | 6  | 686.3559        | 343.6816        | 229.4568        |
|         | 2815.1694       | 1408.0884       | 939.0613        | 26 | T       | 5  | 599.3239        | 300.1656        | 200.4461        |
|         | 2943.2280       | 1472.1176       | 981.7475        | 27 | Q       | 4  | 498.2762        | 249.6417        | 166.7636        |
|         | 3071.2866       | 1536.1469       | 1024.4337       | 28 | Q       | 3  | 370.2176        | 185.6124        | 124.0774        |
|         | 3158.3186       | 1579.6629       | 1053.4444       | 29 | S       | 2  | 242.1590        | 121.5832        | 81.3912         |
|         |                 |                 |                 | 30 | K [136] | 1  | 155.1270        | 78.0671         | 52.3805         |

Annotated spectra from Saleem et. al. 2009

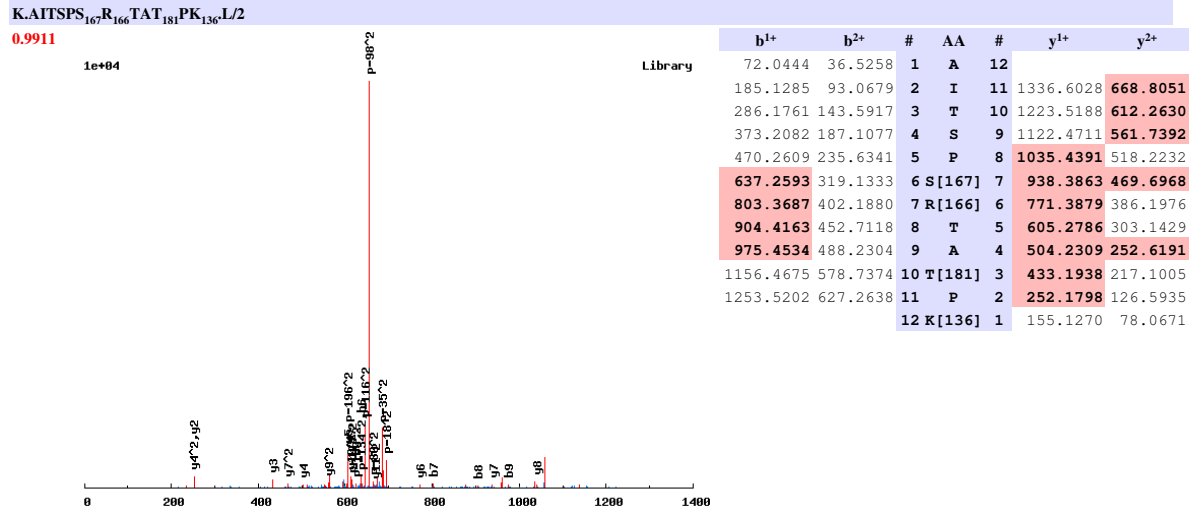

# Annotated spectra from Saleem et. al. 2009

R.AKLSNS<sub>167</sub>S<sub>167</sub>LSNLFK.K/2

0.9583

1e+04

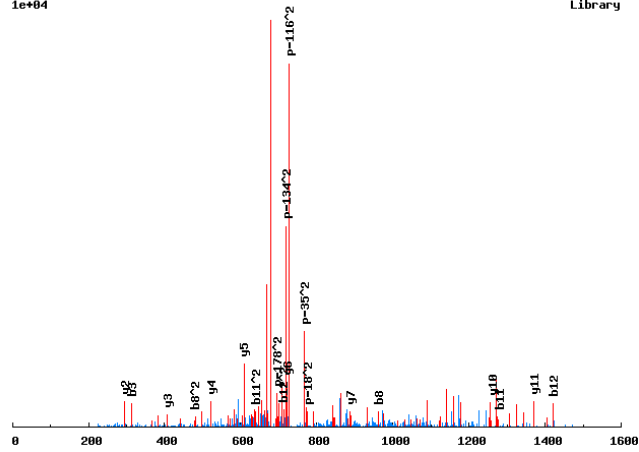

| Library | b <sup>1+</sup> | b <sup>2+</sup> | #  | AA     | #  | y <sup>1+</sup> | y <sup>2+</sup> |
|---------|-----------------|-----------------|----|--------|----|-----------------|-----------------|
|         | 72.0444         | 36.5258         | 1  | A      | 13 |                 |                 |
|         | 200.1394        | 100.5733        | 2  | K      | 12 | 1497.6750       | 749.3411        |
|         | 313.2234        | 157.1153        | 3  | L      | 11 | 1369.5800       | 685.2937        |
|         | 400.2554        | 200.6314        | 4  | S      | 10 | 1256.4960       | 628.7516        |
|         | 514.2984        | 257.6528        | 5  | N      | 9  | 1169.4639       | 585.2356        |
|         | 681.2967        | 341.1520        | 6  | S[167] | 8  | 1055.4210       | 528.2141        |
|         | 848.2951        | 424.6512        | 7  | S[167] | 7  | 888.4227        | 444.7150        |
|         | 961.3792        | 481.1932        | 8  | L      | 6  | 721.4243        | 361.2158        |
|         | 1048.4112       | 524.7092        | 9  | S      | 5  | 608.3402        | 304.6738        |
|         | 1162.4541       | 581.7307        | 10 | N      | 4  | 521.3082        | 261.1577        |
|         | 1275.5382       | 638.2727        | 11 | L      | 3  | 407.2653        | 204.1363        |
|         | 1422.6066       | 711.8069        | 12 | F      | 2  | 294.1812        | 147.5942        |
|         |                 |                 | 13 | K      | 1  | 147.1128        | 74.0600         |

# Annotated spectra from Saleem et. al. 2009

K.AK<sub>136</sub>NS<sub>167</sub>PEPNEFLR<sub>166</sub>D/2

0.9981

1e+04

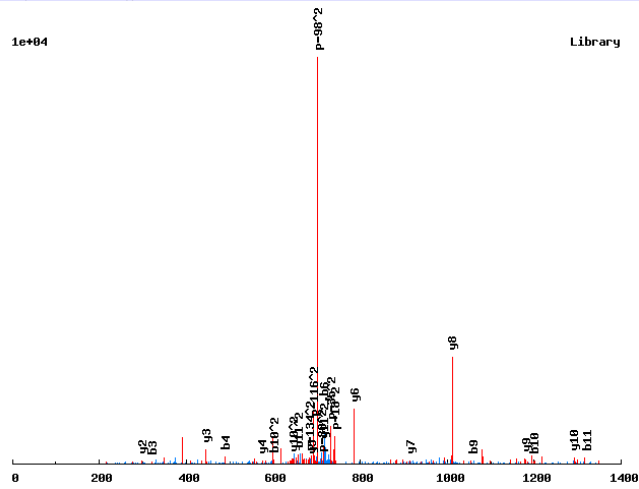

| Library | b <sup>1+</sup> | b <sup>2+</sup> | #  | AA     | #  | y <sup>1+</sup> | y <sup>2+</sup> |
|---------|-----------------|-----------------|----|--------|----|-----------------|-----------------|
|         | 72.0444         | 36.5258         | 1  | A      | 12 |                 |                 |
|         | 208.1535        | 104.5804        | 2  | K[136] | 11 | 1428.6638       | 714.8355        |
|         | 322.1965        | 161.6019        | 3  | N      | 10 | 1292.5546       | 646.7809        |
|         | 489.1948        | 245.1011        | 4  | S[167] | 9  | 1178.5117       | 589.7595        |
|         | 586.2476        | 293.6274        | 5  | P      | 8  | 1011.5133       | 506.2603        |
|         | 715.2902        | 358.1487        | 6  | E      | 7  | 914.4606        | 457.7339        |
|         | 812.3430        | 406.6751        | 7  | P      | 6  | 785.4180        | 393.2126        |
|         | 926.3859        | 463.6966        | 8  | N      | 5  | 688.3652        | 344.6862        |
|         | 1055.4285       | 528.2179        | 9  | E      | 4  | 574.3223        | 287.6648        |
|         | 1202.4969       | 601.7521        | 10 | F      | 3  | 445.2797        | 223.1435        |
|         | 1315.5809       | 658.2941        | 11 | L      | 2  | 298.2113        | 149.6093        |
|         |                 |                 | 12 | R[166] | 1  | 185.1272        | 93.0672         |

# Annotated spectra from Saleem et. al. 2009

R.AK<sub>136</sub>T<sub>181</sub>PT<sub>181</sub>PEPSPASTVASVSTSK<sub>136</sub>S/3

0.963

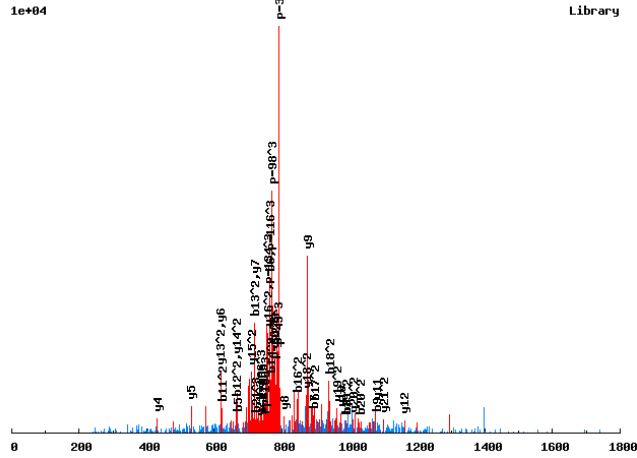

| Library | b <sup>1+</sup> | b <sup>2+</sup> | b <sup>3+</sup> | #  | AA     | #  | y <sup>1+</sup> | y <sup>2+</sup> | y <sup>3+</sup> |
|---------|-----------------|-----------------|-----------------|----|--------|----|-----------------|-----------------|-----------------|
|         | 72.0444         | 36.5258         | 24.6863         | 1  | A      | 23 |                 |                 |                 |
|         | 208.1535        | 104.5804        | 70.0560         | 2  | K[136] | 22 | 2336.0641       | 1168.5357       | 779.3595        |
|         | 389.1676        | 195.0874        | 130.3940        | 3  | T[181] | 21 | 2199.9549       | 1100.4811       | 733.9898        |
|         | 486.2203        | 243.6138        | 162.7450        | 4  | P      | 20 | 2018.9409       | 1009.9741       | 673.6518        |
|         | 667.2343        | 334.1208        | 223.0830        | 5  | T[181] | 19 | 1921.8881       | 961.4477        | 641.3009        |
|         | 764.2871        | 382.6472        | 255.4339        | 6  | P      | 18 | 1740.8741       | 870.9407        | 580.9629        |
|         | 893.3297        | 447.1685        | 298.4481        | 7  | E      | 17 | 1643.8214       | 822.4143        | 548.6120        |
|         | 990.3824        | 495.6949        | 330.7990        | 8  | P      | 16 | 1514.7788       | 757.8930        | 505.5978        |
|         | 1077.4145       | 539.2109        | 359.8097        | 9  | S      | 15 | 1417.7260       | 709.3666        | 473.2469        |
|         | 1174.4672       | 587.7373        | 392.1606        | 10 | P      | 14 | 1330.6940       | 665.8506        | 444.2362        |
|         | 1245.5043       | 623.2558        | 415.8396        | 11 | A      | 13 | 1233.6412       | 617.3243        | 411.8853        |
|         | 1332.5364       | 666.7718        | 444.8503        | 12 | S      | 12 | 1162.6041       | 581.8057        | 388.2062        |
|         | 1433.5841       | 717.2957        | 478.5329        | 13 | T      | 11 | 1075.5721       | 538.2897        | 359.1955        |
|         | 1532.6525       | 766.8299        | 511.5557        | 14 | V      | 10 | 974.5244        | 487.7658        | 325.5130        |
|         | 1603.6896       | 802.3484        | 535.2347        | 15 | A      | 9  | 875.4560        | 438.2316        | 292.4902        |
|         | 1690.7216       | 845.8644        | 564.2454        | 16 | S      | 8  | 804.4189        | 402.7131        | 268.8111        |
|         | 1789.7900       | 895.3986        | 597.2682        | 17 | V      | 7  | 717.3869        | 359.1971        | 239.8005        |
|         | 1876.8220       | 938.9147        | 626.2789        | 18 | S      | 6  | 618.3184        | 309.6629        | 206.7777        |
|         | 1977.8697       | 989.4385        | 659.9614        | 19 | T      | 5  | 531.2864        | 266.1468        | 177.7670        |
|         | 2064.9018       | 1032.9545       | 688.9721        | 20 | S      | 4  | 430.2387        | 215.6230        | 144.0844        |
|         | 2165.9494       | 1083.4784       | 722.6547        | 21 | T      | 3  | 343.2067        | 172.1070        | 115.0738        |
|         | 2252.9815       | 1126.9944       | 751.6653        | 22 | S      | 2  | 242.1590        | 121.5832        | 81.3912         |
|         |                 |                 |                 | 23 | K[136] | 1  | 155.1270        | 78.0671         | 52.3805         |

# Annotated spectra from Saleem et. al. 2009

R.ALS<sub>167</sub>LDDLNVNHDENEK.V/2

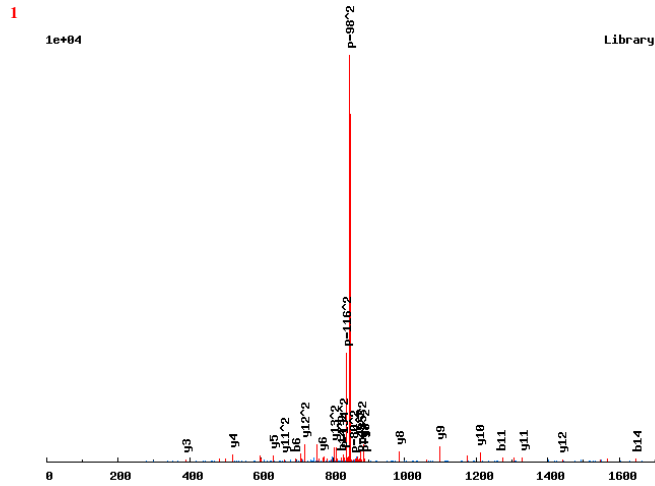

| Library | b <sup>1+</sup> | b <sup>2+</sup> | #  | AA     | #  | y <sup>1+</sup> | y <sup>2+</sup> |
|---------|-----------------|-----------------|----|--------|----|-----------------|-----------------|
|         | 72.0444         | 36.5258         | 1  | A      | 15 |                 |                 |
|         | 185.1285        | 93.0679         | 2  | L      | 14 | 1720.7425       | 860.8749        |
|         | 352.1268        | 176.5670        | 3  | S[167] | 13 | 1607.6585       | 804.3329        |
|         | 465.2109        | 233.1091        | 4  | L      | 12 | 1440.6601       | 720.8337        |
|         | 580.2378        | 290.6225        | 5  | D      | 11 | 1327.5760       | 664.2917        |
|         | 695.2648        | 348.1360        | 6  | D      | 10 | 1212.5491       | 606.7782        |
|         | 808.3488        | 404.6780        | 7  | L      | 9  | 1097.5222       | 549.2647        |
|         | 907.4172        | 454.2123        | 8  | V      | 8  | 984.4381        | 492.7227        |
|         | 1021.4602       | 511.2337        | 9  | N      | 7  | 885.3697        | 443.1885        |
|         | 1158.5191       | 579.7632        | 10 | H      | 6  | 771.3268        | 386.1670        |
|         | 1273.5460       | 637.2766        | 11 | D      | 5  | 634.2679        | 317.6376        |
|         | 1402.5886       | 701.7979        | 12 | E      | 4  | 519.2409        | 260.1241        |
|         | 1516.6315       | 758.8194        | 13 | N      | 3  | 390.1983        | 195.6028        |
|         | 1645.6741       | 823.3407        | 14 | E      | 2  | 276.1554        | 138.5813        |
|         |                 |                 | 15 | K      | 1  | 147.1128        | 74.0600         |

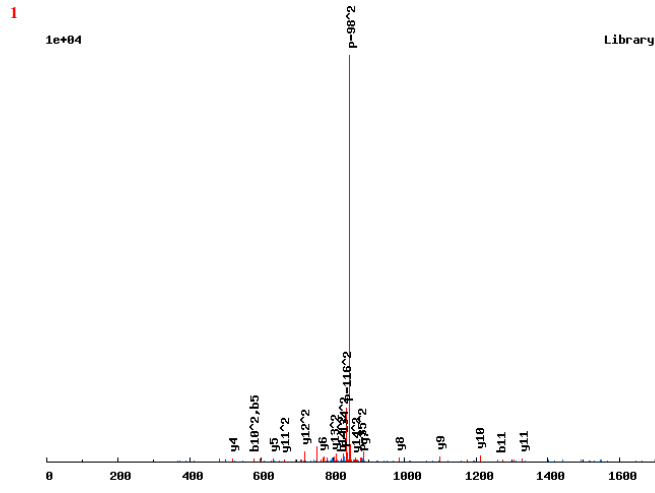

| Library | b <sup>1+</sup> | b <sup>2+</sup> | #  | AA     | #  | y <sup>1+</sup> | y <sup>2+</sup> |
|---------|-----------------|-----------------|----|--------|----|-----------------|-----------------|
|         | 72.0444         | 36.5258         | 1  | A      | 15 |                 |                 |
|         | 185.1285        | 93.0679         | 2  | L      | 14 | 1720.7425       | 860.8749        |
|         | 352.1268        | 176.5670        | 3  | S[167] | 13 | 1607.6585       | 804.3329        |
|         | 465.2109        | 233.1091        | 4  | L      | 12 | 1440.6601       | 720.8337        |
|         | 580.2378        | 290.6225        | 5  | D      | 11 | 1327.5760       | 664.2917        |
|         | 695.2648        | 348.1360        | 6  | D      | 10 | 1212.5491       | 606.7782        |
|         | 808.3488        | 404.6780        | 7  | L      | 9  | 1097.5222       | 549.2647        |
|         | 907.4172        | 454.2123        | 8  | V      | 8  | 984.4381        | 492.7227        |
|         | 1021.4602       | 511.2337        | 9  | N      | 7  | 885.3697        | 443.1885        |
|         | 1158.5191       | 579.7632        | 10 | H      | 6  | 771.3268        | 386.1670        |
|         | 1273.5460       | 637.2766        | 11 | D      | 5  | 634.2679        | 317.6376        |
|         | 1402.5886       | 701.7979        | 12 | E      | 4  | 519.2409        | 260.1241        |
|         | 1516.6315       | 758.8194        | 13 | N      | 3  | 390.1983        | 195.6028        |
|         | 1645.6741       | 823.3407        | 14 | E      | 2  | 276.1554        | 138.5813        |
|         |                 |                 | 15 | K      | 1  | 147.1128        | 74.0600         |



# Annotated spectra from Saleem et. al. 2009

R.ALSNNIQES<sub>167</sub>LVAPAPEQGVPPAIS<sub>167</sub>R.S/3

0.999

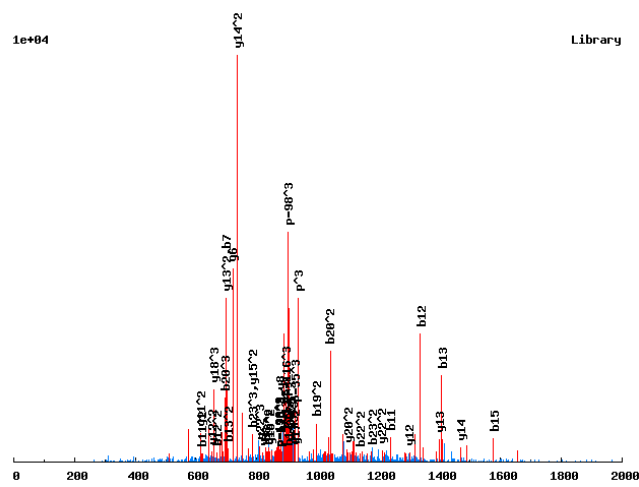

| Library | b <sup>1+</sup> | b <sup>2+</sup> | b <sup>3+</sup> | #  | AA      | #  | y <sup>1+</sup> | y <sup>2+</sup> | y <sup>3+</sup> |
|---------|-----------------|-----------------|-----------------|----|---------|----|-----------------|-----------------|-----------------|
|         | 72.0444         | 36.5258         | 24.6863         | 1  | A       | 26 |                 |                 |                 |
|         | 185.1285        | 93.0679         | 62.3810         | 2  | L       | 25 | 2734.2848       | 1367.6461       | 912.0998        |
|         | 272.1605        | 136.5839        | 91.3917         | 3  | S       | 24 | 2621.2008       | 1311.1040       | 874.4051        |
|         | 386.2034        | 193.6053        | 129.4060        | 4  | N       | 23 | 2534.1687       | 1267.5880       | 845.3944        |
|         | 500.2463        | 250.6268        | 167.4203        | 5  | N       | 22 | 2420.1258       | 1210.5665       | 807.3801        |
|         | 613.3304        | 307.1688        | 205.1150        | 6  | I       | 21 | 2306.0829       | 1153.5451       | 769.3658        |
|         | 700.3624        | 350.6849        | 234.1257        | 7  | S       | 20 | 2192.9988       | 1097.0030       | 731.6711        |
|         | 828.4210        | 414.7141        | 276.8119        | 8  | Q       | 19 | 2105.9668       | 1053.4870       | 702.6604        |
|         | 957.4636        | 479.2354        | 319.8261        | 9  | E       | 18 | 1977.9082       | 989.4577        | 659.9743        |
|         | 1124.4620       | 562.7346        | 375.4922        | 10 | S [167] | 17 | 1848.8656       | 924.9364        | 616.9601        |
|         | 1237.5460       | 619.2767        | 413.1869        | 11 | L       | 16 | 1681.8673       | 841.4373        | 561.2939        |
|         | 1336.6144       | 668.8109        | 446.2097        | 12 | V       | 15 | 1568.7832       | 784.8952        | 523.5993        |
|         | 1407.6515       | 704.3294        | 469.8887        | 13 | A       | 14 | 1469.7148       | 735.3610        | 490.5764        |
|         | 1504.7043       | 752.8558        | 502.2396        | 14 | P       | 13 | 1398.6777       | 699.8425        | 466.8974        |
|         | 1575.7414       | 788.3743        | 525.9187        | 15 | A       | 12 | 1301.6249       | 651.3161        | 434.5465        |
|         | 1672.7942       | 836.9007        | 558.2696        | 16 | P       | 11 | 1230.5878       | 615.7975        | 410.8675        |
|         | 1801.8368       | 901.4220        | 601.2838        | 17 | E       | 10 | 1133.5350       | 567.2712        | 378.5165        |
|         | 1929.8953       | 965.4513        | 643.9700        | 18 | Q       | 9  | 1004.4925       | 502.7499        | 335.5023        |
|         | 1986.9168       | 993.9620        | 662.9771        | 19 | G       | 8  | 876.4339        | 438.7206        | 292.8161        |
|         | 2085.9852       | 1043.4962       | 695.9999        | 20 | V       | 7  | 819.4124        | 410.2098        | 273.8090        |
|         | 2183.0380       | 1092.0226       | 728.3508        | 21 | P       | 6  | 720.3440        | 360.6756        | 240.7862        |
|         | 2280.0907       | 1140.5490       | 760.7018        | 22 | P       | 5  | 623.2912        | 312.1493        | 208.4353        |
|         | 2351.1278       | 1176.0676       | 784.3808        | 23 | A       | 4  | 526.2385        | 263.6229        | 176.0843        |
|         | 2464.2119       | 1232.6096       | 822.0755        | 24 | I       | 3  | 455.2014        | 228.1043        | 152.4053        |
|         | 2631.2103       | 1316.1088       | 877.7416        | 25 | S [167] | 2  | 342.1173        | 171.5623        | 114.7106        |
|         |                 |                 |                 | 26 | R       | 1  | 175.1190        | 88.0631         | 59.0445         |

# Annotated spectra from Saleem et. al. 2009

R.ALS<sub>167</sub>NNIS<sub>167</sub>QESLVAPAPEQGVPPAIS<sub>167</sub>R.S/3

0.9811

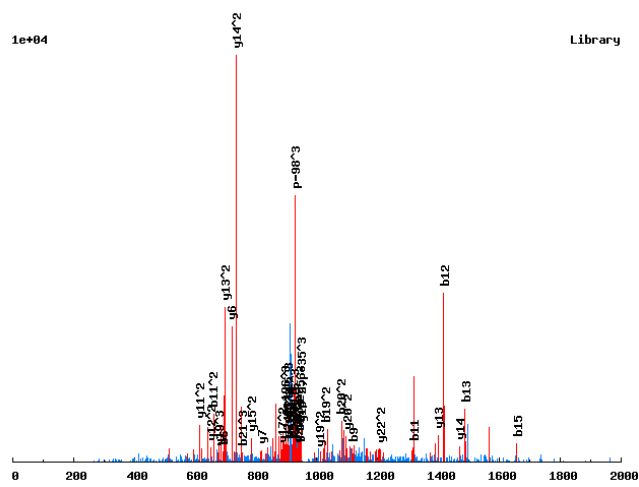

| Library | b <sup>1+</sup> | b <sup>2+</sup> | b <sup>3+</sup> | #  | AA     | #  | y <sup>1+</sup> | y <sup>2+</sup> | y <sup>3+</sup> |
|---------|-----------------|-----------------|-----------------|----|--------|----|-----------------|-----------------|-----------------|
|         | 72.0444         | 36.5258         | 24.6863         | 1  | A      | 26 |                 |                 |                 |
|         | 185.1285        | 93.0679         | 62.3810         | 2  | L      | 25 | 2814.2512       | 1407.6292       | 938.7552        |
|         | 352.1268        | 176.5670        | 118.0471        | 3  | S[167] | 24 | 2701.1671       | 1351.0872       | 901.0606        |
|         | 466.1697        | 233.5885        | 156.0614        | 4  | N      | 23 | 2534.1687       | 1267.5880       | 845.3944        |
|         | 580.2127        | 290.6100        | 194.0757        | 5  | N      | 22 | 2420.1258       | 1210.5665       | 807.3801        |
|         | 693.2967        | 347.1520        | 231.7704        | 6  | I      | 21 | 2306.0829       | 1153.5451       | 769.3658        |
|         | 860.2951        | 430.6512        | 287.4366        | 7  | S[167] | 20 | 2192.9988       | 1097.0030       | 731.6711        |
|         | 988.3537        | 494.6805        | 330.1227        | 8  | Q      | 19 | 2026.0005       | 1013.5039       | 676.0050        |
|         | 1117.3963       | 559.2018        | 373.1369        | 9  | E      | 18 | 1897.9419       | 949.4746        | 633.3188        |
|         | 1204.4283       | 602.7178        | 402.1476        | 10 | S      | 17 | 1768.8993       | 884.9533        | 590.3046        |
|         | 1317.5124       | 659.2598        | 439.8423        | 11 | L      | 16 | 1681.8673       | 841.4373        | 561.2939        |
|         | 1416.5808       | 708.7940        | 472.8651        | 12 | V      | 15 | 1568.7832       | 784.8952        | 523.5993        |
|         | 1487.6179       | 744.3126        | 496.5441        | 13 | A      | 14 | 1469.7148       | 735.3610        | 490.5764        |
|         | 1584.6706       | 792.8390        | 528.8951        | 14 | P      | 13 | 1398.6777       | 699.8425        | 466.8974        |
|         | 1655.7077       | 828.3575        | 552.5741        | 15 | A      | 12 | 1301.6249       | 651.3161        | 434.5465        |
|         | 1752.7605       | 876.8839        | 584.9250        | 16 | P      | 11 | 1230.5878       | 615.7975        | 410.8675        |
|         | 1881.8031       | 941.4052        | 627.9392        | 17 | E      | 10 | 1133.5350       | 567.2712        | 378.5165        |
|         | 2009.8617       | 1005.4345       | 670.6254        | 18 | Q      | 9  | 1004.4925       | 502.7499        | 335.5023        |
|         | 2066.8831       | 1033.9452       | 689.6326        | 19 | G      | 8  | 876.4339        | 438.7206        | 292.8161        |
|         | 2165.9515       | 1083.4794       | 722.6554        | 20 | V      | 7  | 819.4124        | 410.2098        | 273.8090        |
|         | 2263.0043       | 1132.0058       | 755.0063        | 21 | P      | 6  | 720.3440        | 360.6756        | 240.7862        |
|         | 2360.0571       | 1180.5322       | 787.3572        | 22 | P      | 5  | 623.2912        | 312.1493        | 208.4353        |
|         | 2431.0942       | 1216.0507       | 811.0362        | 23 | A      | 4  | 526.2385        | 263.6229        | 176.0843        |
|         | 2544.1782       | 1272.5928       | 848.7309        | 24 | I      | 3  | 455.2014        | 228.1043        | 152.4053        |
|         | 2711.1766       | 1356.0919       | 904.3971        | 25 | S[167] | 2  | 342.1173        | 171.5623        | 114.7106        |
|         |                 |                 |                 | 26 | R      | 1  | 175.1190        | 88.0631         | 59.0445         |

# Annotated spectra from Saleem et. al. 2009

K.ALS<sub>167</sub>PIPSPT<sub>181</sub>R.N/2

0.7838

1e+04

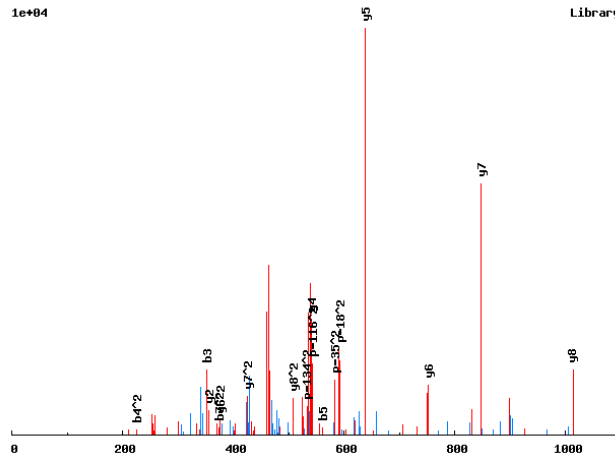

| Library | b <sup>1+</sup> | b <sup>2+</sup> | #  | AA     | #  | y <sup>1+</sup> | y <sup>2+</sup> |
|---------|-----------------|-----------------|----|--------|----|-----------------|-----------------|
|         | 72.0444         | 36.5258         | 1  | A      | 10 |                 |                 |
|         | 185.1285        | 93.0679         | 2  | L      | 9  | 1127.4898       | 564.2485        |
|         | 352.1268        | 176.5670        | 3  | S[167] | 8  | 1014.4057       | 507.7065        |
|         | 449.1796        | 225.0934        | 4  | P      | 7  | 847.4073        | 424.2073        |
|         | 562.2636        | 281.6355        | 5  | I      | 6  | 750.3546        | 375.6809        |
|         | 659.3164        | 330.1618        | 6  | P      | 5  | 637.2705        | 319.1389        |
|         | 746.3484        | 373.6779        | 7  | S      | 4  | 540.2178        | 270.6125        |
|         | 843.4012        | 422.2042        | 8  | P      | 3  | 453.1857        | 227.0965        |
|         | 1024.4152       | 512.7112        | 9  | T[181] | 2  | 356.1330        | 178.5701        |
|         |                 |                 | 10 | R      | 1  | 175.1190        | 88.0631         |

# Annotated spectra from Saleem et. al. 2009

K.ALS<sub>167</sub>PIPS<sub>167</sub>PT<sub>181</sub>R<sub>166</sub>NSVR<sub>166</sub>N/3

0.6549

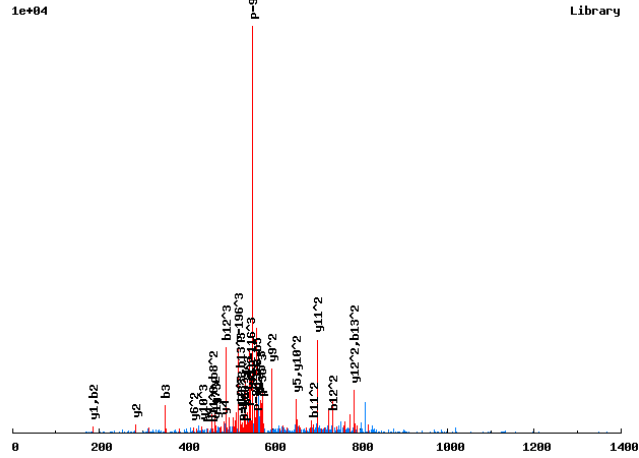

| Library | b <sup>1+</sup> | b <sup>2+</sup> | b <sup>3+</sup> | #  | AA     | #  | y <sup>1+</sup> | y <sup>2+</sup> | y <sup>3+</sup> |
|---------|-----------------|-----------------|-----------------|----|--------|----|-----------------|-----------------|-----------------|
|         | 72.0444         | 36.5258         | 24.6863         | 1  | A      | 14 |                 |                 |                 |
|         | 185.1285        | 93.0679         | 62.3810         | 2  | L      | 13 | 1683.7171       | 842.3622        | 561.9106        |
|         | 352.1268        | 176.5670        | 118.0471        | 3  | S[167] | 12 | 1570.6330       | 785.8202        | 524.2159        |
|         | 449.1796        | 225.0934        | 150.3980        | 4  | P      | 11 | 1403.6347       | 702.3210        | 468.5497        |
|         | 562.2636        | 281.6355        | 188.0927        | 5  | I      | 10 | 1306.5819       | 653.7946        | 436.1988        |
|         | 659.3164        | 330.1618        | 220.4437        | 6  | P      | 9  | 1193.4979       | 597.2526        | 398.5041        |
|         | 826.3148        | 413.6610        | 276.1098        | 7  | S[167] | 8  | 1096.4451       | 548.7262        | 366.1532        |
|         | 923.3675        | 462.1874        | 308.4607        | 8  | P      | 7  | 929.4467        | 465.2270        | 310.4871        |
|         | 1104.3815       | 552.6944        | 368.7987        | 9  | T[181] | 6  | 832.3940        | 416.7006        | 278.1362        |
|         | 1270.4909       | 635.7491        | 424.1685        | 10 | R[166] | 5  | 651.3800        | 326.1936        | 217.7982        |
|         | 1384.5338       | 692.7706        | 462.1828        | 11 | N      | 4  | 485.2706        | 243.1389        | 162.4284        |
|         | 1471.5659       | 736.2866        | 491.1935        | 12 | S      | 3  | 371.2277        | 186.1175        | 124.4141        |
|         | 1570.6343       | 785.8208        | 524.2163        | 13 | V      | 2  | 284.1956        | 142.6015        | 95.4034         |
|         |                 |                 |                 | 14 | R[166] | 1  | 185.1272        | 93.0672         | 62.3806         |

# Annotated spectra from Saleem et. al. 2009

R.ALS<sub>167</sub>TAS<sub>167</sub>LISSNGQTSASK.N/2

0.9998

1e+04

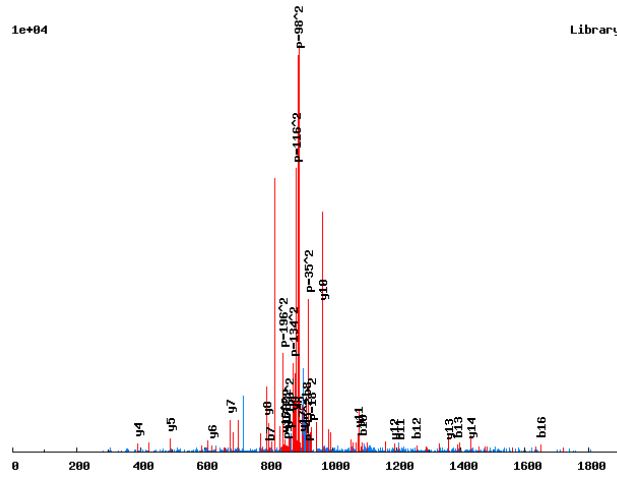

Library

| b <sup>1+</sup> | b <sup>2+</sup> | #  | AA     | #  | y <sup>1+</sup> | y <sup>2+</sup> |
|-----------------|-----------------|----|--------|----|-----------------|-----------------|
| 72.0444         | 36.5258         | 1  | A      | 18 |                 |                 |
| 185.1285        | 93.0679         | 2  | L      | 17 | 1811.7824       | 906.3948        |
| 352.1268        | 176.5670        | 3  | S[167] | 16 | 1698.6983       | 849.8528        |
| 453.1745        | 227.0909        | 4  | T      | 15 | 1531.7000       | 766.3536        |
| 524.2116        | 262.6094        | 5  | A      | 14 | 1430.6523       | 715.8298        |
| 691.2100        | 346.1086        | 6  | S[167] | 13 | 1359.6152       | 680.3112        |
| 804.2940        | 402.6507        | 7  | L      | 12 | 1192.6168       | 596.8120        |
| 917.3781        | 459.1927        | 8  | I      | 11 | 1079.5327       | 540.2700        |
| 1004.4101       | 502.7087        | 9  | S      | 10 | 966.4487        | 483.7280        |
| 1091.4421       | 546.2247        | 10 | S      | 9  | 879.4167        | 440.2120        |
| 1205.4851       | 603.2462        | 11 | N      | 8  | 792.3846        | 396.6960        |
| 1262.5065       | 631.7569        | 12 | G      | 7  | 678.3417        | 339.6745        |
| 1390.5651       | 695.7862        | 13 | Q      | 6  | 621.3202        | 311.1638        |
| 1491.6128       | 746.3100        | 14 | T      | 5  | 493.2617        | 247.1345        |
| 1578.6448       | 789.8261        | 15 | S      | 4  | 392.2140        | 196.6106        |
| 1649.6819       | 825.3446        | 16 | A      | 3  | 305.1819        | 153.0946        |
| 1736.7140       | 868.8606        | 17 | S      | 2  | 234.1448        | 117.5761        |
|                 |                 | 18 | K      | 1  | 147.1128        | 74.0600         |

# Annotated spectra from Saleem et. al. 2009

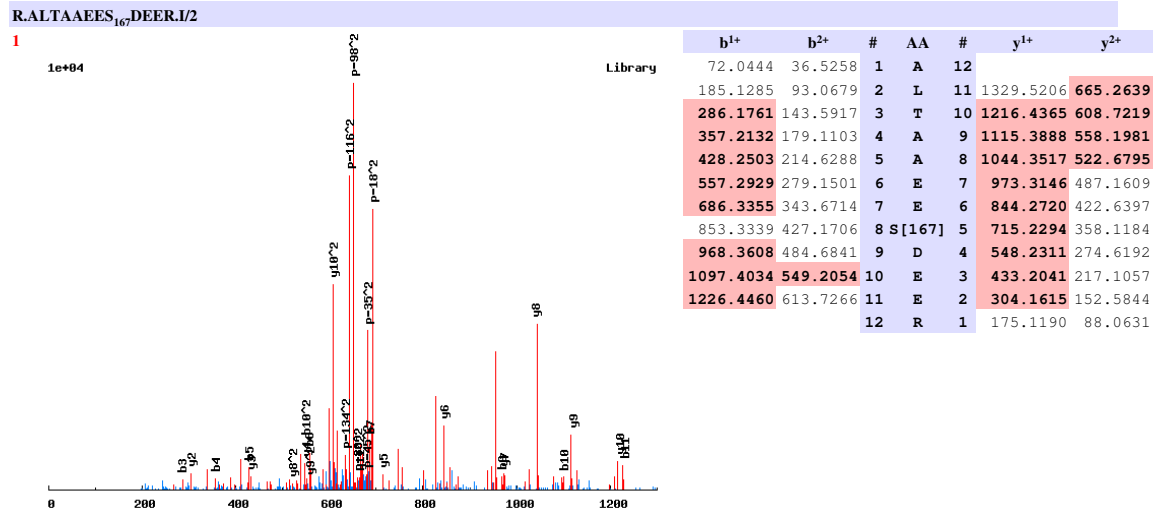

# Annotated spectra from Saleem et. al. 2009

K.AM<sub>147</sub>DNGLSLPIS<sub>167</sub>R<sub>166</sub>N/2

0.8322

1e+04

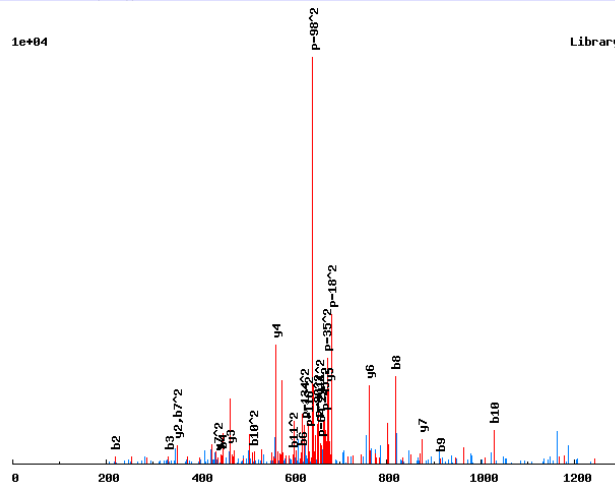

| Library | b <sup>1+</sup>  | b <sup>2+</sup> | #  | AA     | #  | y <sup>1+</sup> | y <sup>2+</sup> |
|---------|------------------|-----------------|----|--------|----|-----------------|-----------------|
|         | 72.0444          | 36.5258         | 1  | A      | 12 |                 |                 |
|         | <b>219.0798</b>  | 110.0435        | 2  | M[147] | 11 | 1308.5893       | <b>654.7983</b> |
|         | <b>334.1067</b>  | 167.5570        | 3  | D      | 10 | 1161.5539       | 581.2806        |
|         | <b>448.1497</b>  | 224.5785        | 4  | N      | 9  | 1046.5269       | 523.7671        |
|         | 505.1711         | 253.0892        | 5  | G      | 8  | 932.4840        | 466.7456        |
|         | <b>618.2552</b>  | 309.6312        | 6  | L      | 7  | <b>875.4626</b> | <b>438.2349</b> |
|         | 705.2872         | <b>353.1472</b> | 7  | S      | 6  | <b>762.3785</b> | 381.6929        |
|         | <b>818.3713</b>  | 409.6893        | 8  | L      | 5  | <b>675.3465</b> | 338.1769        |
|         | <b>915.4240</b>  | 458.2157        | 9  | P      | 4  | <b>562.2624</b> | 281.6348        |
|         | <b>1028.5081</b> | <b>514.7577</b> | 10 | I      | 3  | <b>465.2096</b> | 233.1085        |
|         | 1195.5065        | <b>598.2569</b> | 11 | S[167] | 2  | <b>352.1256</b> | 176.5664        |
|         |                  |                 | 12 | R[166] | 1  | 185.1272        | 93.0672         |

# Annotated spectra from Saleem et. al. 2009

K.ANDKQT<sub>181</sub>IVKVK.N/3

0.7249

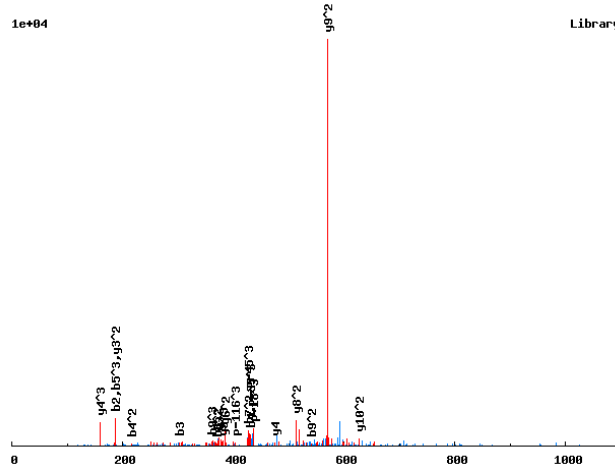

| Library | b <sup>1+</sup> | b <sup>2+</sup> | b <sup>3+</sup> | #  | AA      | #  | y <sup>1+</sup> | y <sup>2+</sup> | y <sup>3+</sup> |
|---------|-----------------|-----------------|-----------------|----|---------|----|-----------------|-----------------|-----------------|
|         | 72.0444         | 36.5258         | 24.6863         | 1  | A       | 11 |                 |                 |                 |
|         | 186.0873        | 93.5473         | 62.7006         | 2  | N       | 10 | 1252.6661       | 626.8367        | 418.2269        |
|         | 301.1143        | 151.0608        | 101.0429        | 3  | D       | 9  | 1138.6231       | 569.8152        | 380.2126        |
|         | 429.2092        | 215.1082        | 143.7413        | 4  | K       | 8  | 1023.5962       | 512.3017        | 341.8703        |
|         | 557.2678        | 279.1375        | 186.4275        | 5  | Q       | 7  | 895.5012        | 448.2543        | 299.1719        |
|         | 738.2818        | 369.6445        | 246.7655        | 6  | T [181] | 6  | 767.4427        | 384.2250        | 256.4857        |
|         | 851.3659        | 426.1866        | 284.4601        | 7  | I       | 5  | 586.4286        | 293.7180        | 196.1477        |
|         | 950.4343        | 475.7208        | 317.4829        | 8  | V       | 4  | 473.3446        | 237.1759        | 158.4530        |
|         | 1078.5292       | 539.7683        | 360.1813        | 9  | K       | 3  | 374.2762        | 187.6417        | 125.4302        |
|         | 1177.5977       | 589.3025        | 393.2041        | 10 | V       | 2  | 246.1812        | 123.5942        | 82.7319         |
|         |                 |                 |                 | 11 | K       | 1  | 147.1128        | 74.0600         | 49.7091         |



# Annotated spectra from Saleem et. al. 2009

R.ANKKS<sub>167</sub>SET<sub>181</sub>SPDST<sub>181</sub>PAPSAPASTNAPTNNK.E/3

0.9978

1e+04

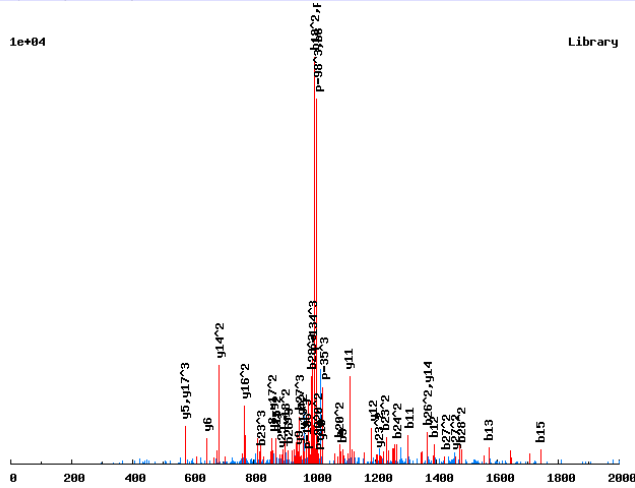

| Library | b <sup>1+</sup> | b <sup>2+</sup> | b <sup>3+</sup> | #  | AA     | #  | y <sup>1+</sup> | y <sup>2+</sup> | y <sup>3+</sup> |
|---------|-----------------|-----------------|-----------------|----|--------|----|-----------------|-----------------|-----------------|
|         | 72.0444         | 36.5258         | 24.6863         | 1  | A      | 29 |                 |                 |                 |
|         | 186.0873        | 93.5473         | 62.7006         | 2  | N      | 28 | 3039.2381       | 1520.1227       | 1013.7509       |
|         | 314.1823        | 157.5948        | 105.3989        | 3  | K      | 27 | 2925.1952       | 1463.1012       | 975.7366        |
|         | 442.2772        | 221.6423        | 148.0973        | 4  | K      | 26 | 2797.1002       | 1399.0537       | 933.0383        |
|         | 609.2756        | 305.1414        | 203.7634        | 5  | S[167] | 25 | 2669.0053       | 1335.0063       | 890.3399        |
|         | 696.3076        | 348.6575        | 232.7741        | 6  | S      | 24 | 2502.0069       | 1251.5071       | 834.6738        |
|         | 825.3502        | 413.1788        | 275.7883        | 7  | E      | 23 | 2414.9749       | 1207.9911       | 805.6631        |
|         | 1006.3642       | 503.6858        | 336.1263        | 8  | T[181] | 22 | 2285.9323       | 1143.4698       | 762.6489        |
|         | 1093.3963       | 547.2018        | 365.1369        | 9  | S      | 21 | 2104.9183       | 1052.9628       | 702.3109        |
|         | 1190.4490       | 595.7282        | 397.4879        | 10 | P      | 20 | 2017.8862       | 1009.4468       | 673.3003        |
|         | 1305.4760       | 653.2416        | 435.8302        | 11 | D      | 19 | 1920.8335       | 960.9204        | 640.9493        |
|         | 1392.5080       | 696.7576        | 464.8409        | 12 | S      | 18 | 1805.8065       | 903.4069        | 602.6070        |
|         | 1573.5220       | 787.2646        | 525.1789        | 13 | T[181] | 17 | 1718.7745       | 859.8909        | 573.5964        |
|         | 1670.5748       | 835.7910        | 557.5298        | 14 | P      | 16 | 1537.7605       | 769.3839        | 513.2583        |
|         | 1741.6119       | 871.3096        | 581.2088        | 15 | A      | 15 | 1440.7077       | 720.8575        | 480.9074        |
|         | 1838.6646       | 919.8360        | 613.5597        | 16 | P      | 14 | 1369.6706       | 685.3389        | 457.2284        |
|         | 1925.6967       | 963.3520        | 642.5704        | 17 | S      | 13 | 1272.6179       | 636.8126        | 424.8775        |
|         | 1996.7338       | 998.8705        | 666.2494        | 18 | A      | 12 | 1185.5858       | 593.2966        | 395.8668        |
|         | 2093.7865       | 1047.3969       | 698.6004        | 19 | P      | 11 | 1114.5487       | 557.7780        | 372.1878        |
|         | 2164.8236       | 1082.9155       | 722.2794        | 20 | A      | 10 | 1017.4960       | 509.2516        | 339.8368        |
|         | 2251.8557       | 1126.4315       | 751.2901        | 21 | S      | 9  | 946.4588        | 473.7331        | 316.1578        |
|         | 2352.9034       | 1176.9553       | 784.9726        | 22 | T      | 8  | 859.4268        | 430.2171        | 287.1471        |
|         | 2466.9463       | 1233.9768       | 822.9869        | 23 | N      | 7  | 758.3791        | 379.6932        | 253.4646        |
|         | 2537.9834       | 1269.4953       | 846.6660        | 24 | A      | 6  | 644.3362        | 322.6717        | 215.4503        |
|         | 2635.0362       | 1318.0217       | 879.0169        | 25 | P      | 5  | 573.2991        | 287.1532        | 191.7712        |
|         | 2736.0838       | 1368.5456       | 912.6995        | 26 | T      | 4  | 476.2463        | 238.6268        | 159.4203        |
|         | 2850.1268       | 1425.5670       | 950.7138        | 27 | N      | 3  | 375.1987        | 188.1030        | 125.7377        |
|         | 2964.1697       | 1482.5885       | 988.7281        | 28 | N      | 2  | 261.1557        | 131.0815        | 87.7234         |
|         |                 |                 |                 | 29 | K      | 1  | 147.1128        | 74.0600         | 49.7091         |

# Annotated spectra from Saleem et. al. 2009

R.ANKSS<sub>167</sub>ET<sub>181</sub>SPDSTPAPSAPASTNAPTNNKETSPEEK.K/4

0.773

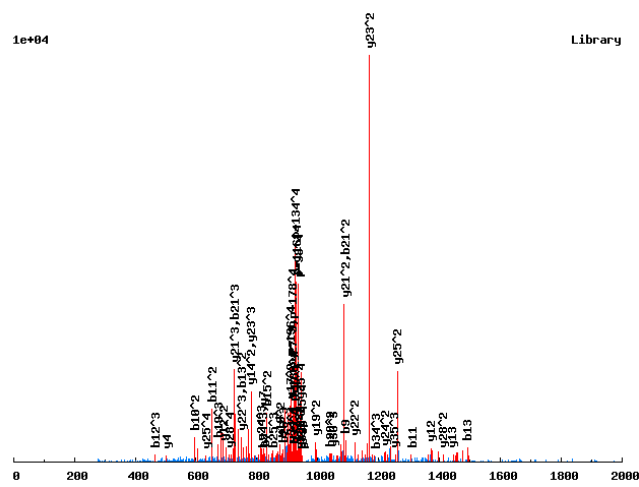

| Library | b <sup>1+</sup> | b <sup>2+</sup> | b <sup>3+</sup> | b <sup>4+</sup> | #  | AA     | #  | y <sup>1+</sup> | y <sup>2+</sup> | y <sup>3+</sup> | y <sup>4+</sup> |
|---------|-----------------|-----------------|-----------------|-----------------|----|--------|----|-----------------|-----------------|-----------------|-----------------|
|         | 72.0444         | 36.5258         | 24.6863         | 18.7666         | 1  | A      | 36 |                 |                 |                 |                 |
|         | 186.0873        | 93.5473         | 62.7006         | 47.2773         | 2  | N      | 35 | 3759.6270       | 1880.3171       | 1253.8805       | 940.6622        |
|         | 314.1823        | 157.5948        | 105.3989        | 79.3010         | 3  | K      | 34 | 3645.5840       | 1823.2957       | 1215.8662       | 912.1515        |
|         | 442.2772        | 221.6423        | 148.0973        | 111.3248        | 4  | K      | 33 | 3517.4891       | 1759.2482       | 1173.1679       | 880.1277        |
|         | 529.3093        | 265.1583        | 177.1079        | 133.0828        | 5  | S      | 32 | 3389.3941       | 1695.2007       | 1130.4696       | 848.1040        |
|         | 696.3076        | 348.6575        | 232.7741        | 174.8324        | 6  | S[167] | 31 | 3302.3621       | 1651.6847       | 1101.4589       | 826.3460        |
|         | 825.3502        | 413.1788        | 275.7883        | 207.0930        | 7  | E      | 30 | 3135.3637       | 1568.1855       | 1045.7928       | 784.5964        |
|         | 1006.3642       | 503.6858        | 336.1263        | 252.3465        | 8  | T[181] | 29 | 3006.3211       | 1503.6642       | 1002.7786       | 752.3357        |
|         | 1093.3963       | 547.2018        | 365.1369        | 274.1045        | 9  | S      | 28 | 2825.3071       | 1413.1572       | 942.4406        | 707.0822        |
|         | 1190.4490       | 595.7282        | 397.4879        | 298.3677        | 10 | P      | 27 | 2738.2751       | 1369.6412       | 913.4299        | 685.3242        |
|         | 1305.4760       | 653.2416        | 435.8302        | 327.1245        | 11 | D      | 26 | 2641.2223       | 1321.1148       | 881.0790        | 661.0610        |
|         | 1392.5080       | 696.7576        | 464.8409        | 348.8825        | 12 | S      | 25 | 2526.1954       | 1263.6013       | 842.7367        | 632.3043        |
|         | 1493.5557       | 747.2815        | 498.5234        | 374.1444        | 13 | T      | 24 | 2439.1634       | 1220.0853       | 813.7260        | 610.5463        |
|         | 1590.6084       | 795.8079        | 530.8743        | 398.4076        | 14 | P      | 23 | 2338.1157       | 1169.5615       | 780.0434        | 585.2844        |
|         | 1661.6455       | 831.3264        | 554.5534        | 416.1668        | 15 | A      | 22 | 2241.0629       | 1121.0351       | 747.6925        | 561.0212        |
|         | 1758.6983       | 879.8528        | 586.9043        | 440.4300        | 16 | P      | 21 | 2170.0258       | 1085.5165       | 724.0135        | 543.2619        |
|         | 1845.7303       | 923.3688        | 615.9150        | 462.1880        | 17 | S      | 20 | 2072.9731       | 1036.9902       | 691.6625        | 518.9987        |
|         | 1916.7674       | 958.8874        | 639.5940        | 479.9473        | 18 | A      | 19 | 1985.9410       | 993.4742        | 662.6519        | 497.2407        |
|         | 2013.8202       | 1007.4137       | 671.9449        | 504.2105        | 19 | P      | 18 | 1914.9039       | 957.9556        | 638.9728        | 479.4814        |
|         | 2084.8573       | 1042.9323       | 695.6240        | 521.9698        | 20 | A      | 17 | 1817.8512       | 909.4292        | 606.6219        | 455.2183        |
|         | 2171.8893       | 1086.4483       | 724.6346        | 543.7278        | 21 | S      | 16 | 1746.8140       | 873.9107        | 582.9429        | 437.4590        |
|         | 2272.9370       | 1136.9722       | 758.3172        | 568.9897        | 22 | T      | 15 | 1659.7820       | 830.3946        | 553.9322        | 415.7010        |
|         | 2386.9800       | 1193.9936       | 796.3315        | 597.5004        | 23 | N      | 14 | 1558.7343       | 779.8708        | 520.2496        | 390.4390        |
|         | 2458.0171       | 1229.5122       | 820.0105        | 615.2597        | 24 | A      | 13 | 1444.6914       | 722.8493        | 482.2353        | 361.9283        |
|         | 2555.0698       | 1278.0386       | 852.3615        | 639.5229        | 25 | P      | 12 | 1373.6543       | 687.3308        | 458.5563        | 344.1690        |
|         | 2656.1175       | 1328.5624       | 886.0440        | 664.7848        | 26 | T      | 11 | 1276.6015       | 638.8044        | 426.2054        | 319.9058        |
|         | 2770.1604       | 1385.5839       | 924.0583        | 693.2956        | 27 | N      | 10 | 1175.5539       | 588.2806        | 392.5228        | 294.6439        |
|         | 2884.2034       | 1442.6053       | 962.0726        | 721.8063        | 28 | N      | 9  | 1061.5109       | 531.2591        | 354.5085        | 266.1332        |
|         | 3012.2983       | 1506.6528       | 1004.7710       | 753.8300        | 29 | K      | 8  | 947.4680        | 474.2376        | 316.4942        | 237.6225        |
|         | 3141.3409       | 1571.1741       | 1047.7852       | 786.0907        | 30 | E      | 7  | 819.3730        | 410.1902        | 273.7959        | 205.5987        |
|         | 3242.3886       | 1621.6979       | 1081.4677       | 811.3526        | 31 | T      | 6  | 690.3305        | 345.6689        | 230.7817        | 173.3381        |
|         | 3329.4206       | 1665.2140       | 1110.4784       | 833.1106        | 32 | S      | 5  | 589.2828        | 295.1450        | 197.0991        | 148.0762        |
|         | 3426.4734       | 1713.7403       | 1142.8293       | 857.3738        | 33 | P      | 4  | 502.2507        | 251.6290        | 168.0884        | 126.3181        |
|         | 3555.5160       | 1778.2616       | 1185.8435       | 889.6345        | 34 | E      | 3  | 405.1980        | 203.1026        | 135.7375        | 102.0550        |
|         | 3684.5586       | 1842.7829       | 1228.8577       | 921.8951        | 35 | E      | 2  | 276.1554        | 138.5813        | 92.7233         | 69.7943         |
|         |                 |                 |                 |                 | 36 | K      | 1  | 147.1128        | 74.0600         | 49.7091         | 37.5337         |

# Annotated spectra from Saleem et. al. 2009

R.ANLDK<sub>136</sub>PITEGIAS<sub>167</sub>PT<sub>181</sub>SPK<sub>136</sub>S/3

0.9998

1e+04

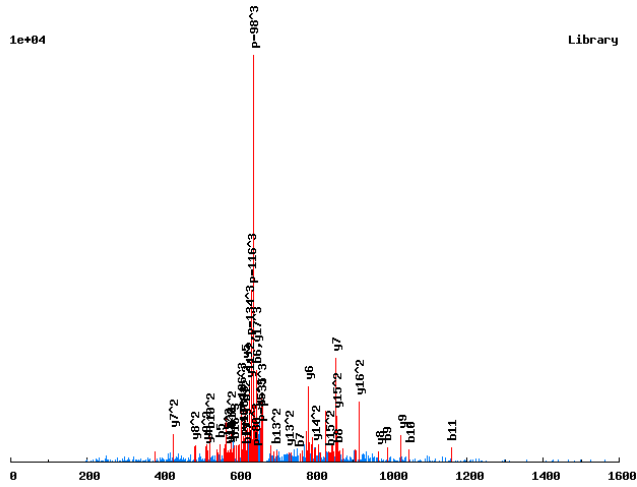

| Library | b <sup>1+</sup> | b <sup>2+</sup> | b <sup>3+</sup> | #  | AA     | #  | y <sup>1+</sup> | y <sup>2+</sup> | y <sup>3+</sup> |
|---------|-----------------|-----------------|-----------------|----|--------|----|-----------------|-----------------|-----------------|
|         | 72.0444         | 36.5258         | 24.6863         | 1  | A      | 18 |                 |                 |                 |
|         | 186.0873        | 93.5473         | 62.7006         | 2  | N      | 17 | 1943.9097       | 972.4585        | 648.6414        |
|         | 299.1714        | 150.0893        | 100.3953        | 3  | L      | 16 | 1829.8668       | 915.4370        | 610.6271        |
|         | 414.1983        | 207.6028        | 138.7376        | 4  | D      | 15 | 1716.7827       | 858.8950        | 572.9324        |
|         | 550.3075        | 275.6574        | 184.1073        | 5  | K[136] | 14 | 1601.7558       | 801.3815        | 534.5901        |
|         | 647.3602        | 324.1838        | 216.4583        | 6  | P      | 13 | 1465.6466       | 733.3270        | 489.2204        |
|         | 760.4443        | 380.7258        | 254.1530        | 7  | I      | 12 | 1368.5939       | 684.8006        | 456.8695        |
|         | 861.4920        | 431.2496        | 287.8355        | 8  | T      | 11 | 1255.5098       | 628.2586        | 419.1748        |
|         | 990.5346        | 495.7709        | 330.8497        | 9  | E      | 10 | 1154.4621       | 577.7347        | 385.4922        |
|         | 1047.5560       | 524.2817        | 349.8569        | 10 | G      | 9  | 1025.4196       | 513.2134        | 342.4780        |
|         | 1160.6401       | 580.8237        | 387.5515        | 11 | I      | 8  | 968.3981        | 484.7027        | 323.4709        |
|         | 1231.6772       | 616.3422        | 411.2306        | 12 | A      | 7  | 855.3140        | 428.1607        | 285.7762        |
|         | 1398.6756       | 699.8414        | 466.8967        | 13 | S[167] | 6  | 784.2769        | 392.6421        | 262.0972        |
|         | 1495.7283       | 748.3678        | 499.2476        | 14 | P      | 5  | 617.2786        | 309.1429        | 206.4310        |
|         | 1676.7423       | 838.8748        | 559.5856        | 15 | T[181] | 4  | 520.2258        | 260.6165        | 174.0801        |
|         | 1763.7744       | 882.3908        | 588.5963        | 16 | S      | 3  | 339.2118        | 170.1095        | 113.7421        |
|         | 1860.8271       | 930.9172        | 620.9472        | 17 | P      | 2  | 252.1798        | 126.5935        | 84.7314         |
|         |                 |                 |                 | 18 | K[136] | 1  | 155.1270        | 78.0671         | 52.3805         |

# Annotated spectra from Saleem et. al. 2009

R.ANS<sub>167</sub>DEPSDAEKKPVS<sub>167</sub>K.L/3

0.7223

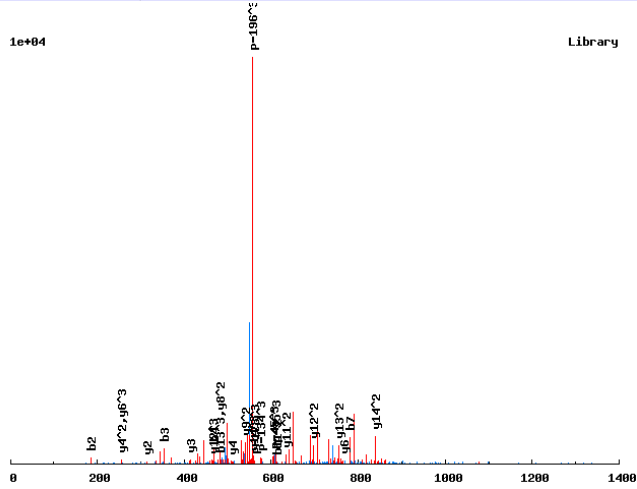

| Library | b <sup>1+</sup> | b <sup>2+</sup> | b <sup>3+</sup> | #  | AA     | #  | y <sup>1+</sup> | y <sup>2+</sup> | y <sup>3+</sup> |
|---------|-----------------|-----------------|-----------------|----|--------|----|-----------------|-----------------|-----------------|
|         | 72.0444         | 36.5258         | 24.6863         | 1  | A      | 16 |                 |                 |                 |
|         | 186.0873        | 93.5473         | 62.7006         | 2  | N      | 15 | 1790.7245       | 895.8659        | 597.5797        |
|         | 353.0857        | 177.0465        | 118.3667        | 3  | S[167] | 14 | 1676.6816       | 838.8444        | 559.5654        |
|         | 468.1126        | 234.5600        | 156.7091        | 4  | D      | 13 | 1509.6832       | 755.3452        | 503.8993        |
|         | 597.1552        | 299.0812        | 199.7233        | 5  | E      | 12 | 1394.6563       | 697.8318        | 465.5569        |
|         | 694.2080        | 347.6076        | 232.0742        | 6  | P      | 11 | 1265.6137       | 633.3105        | 422.5427        |
|         | 781.2400        | 391.1236        | 261.0849        | 7  | S      | 10 | 1168.5609       | 584.7841        | 390.1918        |
|         | 896.2669        | 448.6371        | 299.4272        | 8  | D      | 9  | 1081.5289       | 541.2681        | 361.1812        |
|         | 967.3041        | 484.1557        | 323.1062        | 9  | A      | 8  | 966.5020        | 483.7546        | 322.8388        |
|         | 1096.3466       | 548.6770        | 366.1204        | 10 | E      | 7  | 895.4648        | 448.2361        | 299.1598        |
|         | 1224.4416       | 612.7244        | 408.8187        | 11 | K      | 6  | 766.4223        | 383.7148        | 256.1456        |
|         | 1352.5366       | 676.7719        | 451.5170        | 12 | K      | 5  | 638.3273        | 319.6673        | 213.4473        |
|         | 1449.5893       | 725.2983        | 483.8680        | 13 | P      | 4  | 510.2323        | 255.6198        | 170.7490        |
|         | 1548.6577       | 774.8325        | 516.8908        | 14 | V      | 3  | 413.1796        | 207.0934        | 138.3980        |
|         | 1715.6561       | 858.3317        | 572.5569        | 15 | S[167] | 2  | 314.1112        | 157.5592        | 105.3752        |
|         |                 |                 |                 | 16 | K      | 1  | 147.1128        | 74.0600         | 49.7091         |

# Annotated spectra from Saleem et. al. 2009

K.ANS<sub>167</sub>EPPT<sub>181</sub>PAGT<sub>181</sub>PNVPTTR.R/2

0.9959

1e+04

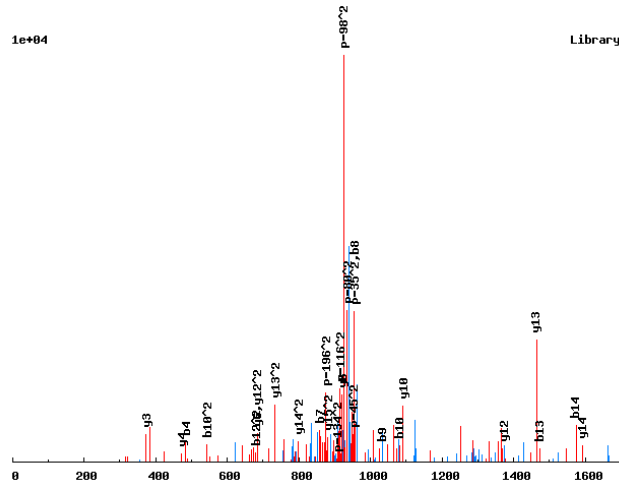

Library

|  | b <sup>1+</sup> | b <sup>2+</sup> | #  | AA     | #  | y <sup>1+</sup> | y <sup>2+</sup> |
|--|-----------------|-----------------|----|--------|----|-----------------|-----------------|
|  | 72.0444         | 36.5258         | 1  | A      | 17 |                 |                 |
|  | 186.0873        | 93.5473         | 2  | N      | 16 | 1874.7122       | 937.8598        |
|  | 353.0857        | 177.0465        | 3  | S[167] | 15 | 1760.6693       | 880.8383        |
|  | 482.1283        | 241.5678        | 4  | E      | 14 | 1593.6710       | 797.3391        |
|  | 579.1810        | 290.0942        | 5  | P      | 13 | 1464.6284       | 732.8178        |
|  | 676.2338        | 338.6205        | 6  | P      | 12 | 1367.5756       | 684.2914        |
|  | 857.2478        | 429.1275        | 7  | T[181] | 11 | 1270.5228       | 635.7651        |
|  | 954.3006        | 477.6539        | 8  | P      | 10 | 1089.5088       | 545.2581        |
|  | 1025.3377       | 513.1725        | 9  | A      | 9  | 992.4561        | 496.7317        |
|  | 1082.3591       | 541.6832        | 10 | G      | 8  | 921.4190        | 461.2131        |
|  | 1263.3731       | 632.1902        | 11 | T[181] | 7  | 864.3975        | 432.7024        |
|  | 1360.4259       | 680.7166        | 12 | P      | 6  | 683.3835        | 342.1954        |
|  | 1474.4688       | 737.7381        | 13 | N      | 5  | 586.3307        | 293.6690        |
|  | 1573.5372       | 787.2723        | 14 | V      | 4  | 472.2878        | 236.6475        |
|  | 1670.5900       | 835.7986        | 15 | P      | 3  | 373.2194        | 187.1133        |
|  | 1771.6377       | 886.3225        | 16 | T      | 2  | 276.1666        | 138.5870        |
|  |                 |                 | 17 | R      | 1  | 175.1190        | 88.0631         |

# Annotated spectra from Saleem et. al. 2009

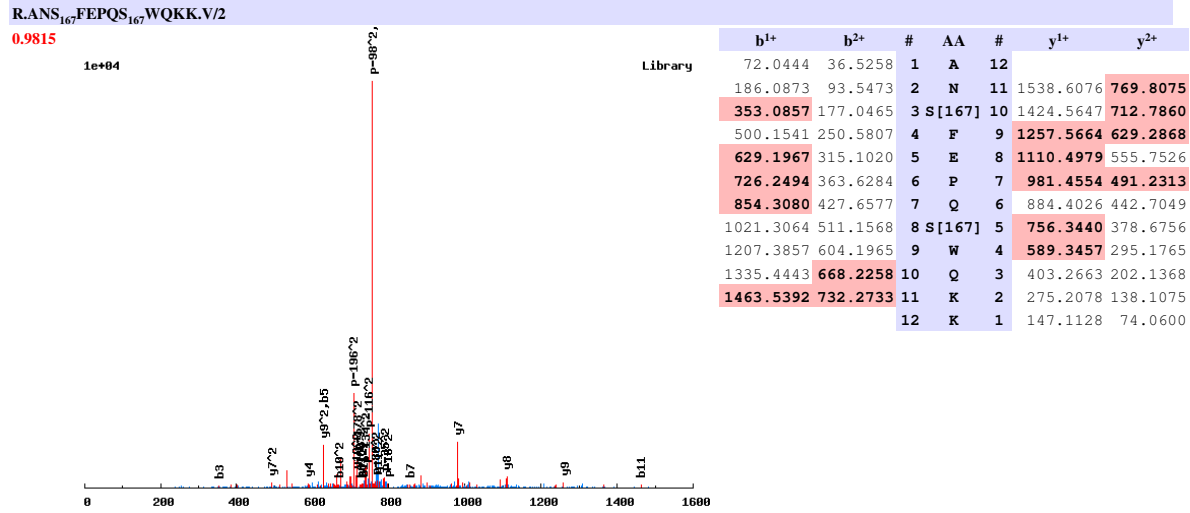

# Annotated spectra from Saleem et. al. 2009

R.ANSNEDGES<sub>167</sub>VSS<sub>167</sub>IQES<sub>167</sub>PK.I/2

0.9999

1e+04

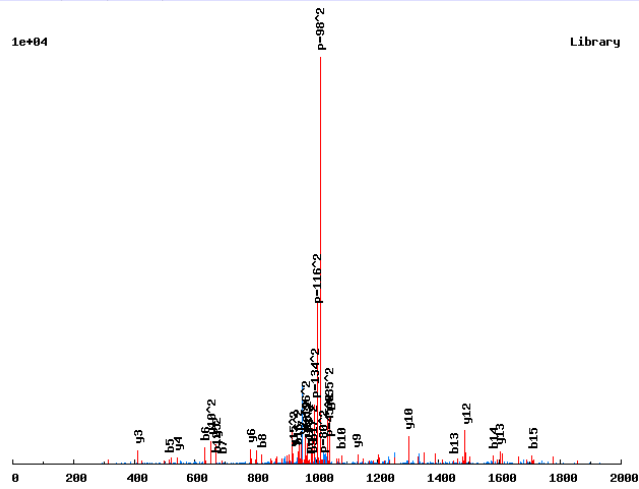

| Library | b <sup>1+</sup> | b <sup>2+</sup> | #  | AA     | #  | y <sup>1+</sup> | y <sup>2+</sup> |
|---------|-----------------|-----------------|----|--------|----|-----------------|-----------------|
|         | 72.0444         | 36.5258         | 1  | A      | 18 |                 |                 |
|         | 186.0873        | 93.5473         | 2  | N      | 17 | 2046.6978       | 1023.8525       |
|         | 273.1193        | 137.0633        | 3  | S      | 16 | 1932.6549       | 966.8311        |
|         | 387.1623        | 194.0848        | 4  | N      | 15 | 1845.6228       | 923.3151        |
|         | 516.2049        | 258.6061        | 5  | E      | 14 | 1731.5799       | 866.2936        |
|         | 631.2318        | 316.1195        | 6  | D      | 13 | 1602.5373       | 801.7723        |
|         | 688.2533        | 344.6303        | 7  | G      | 12 | 1487.5104       | 744.2588        |
|         | 817.2959        | 409.1516        | 8  | E      | 11 | 1430.4889       | 715.7481        |
|         | 984.2942        | 492.6508        | 9  | S[167] | 10 | 1301.4463       | 651.2268        |
|         | 1083.3626       | 542.1850        | 10 | V      | 9  | 1134.4480       | 567.7276        |
|         | 1170.3947       | 585.7010        | 11 | S      | 8  | 1035.3795       | 518.1934        |
|         | 1337.3930       | 669.2002        | 12 | S[167] | 7  | 948.3475        | 474.6774        |
|         | 1450.4771       | 725.7422        | 13 | I      | 6  | 781.3492        | 391.1782        |
|         | 1578.5357       | 789.7715        | 14 | Q      | 5  | 668.2651        | 334.6362        |
|         | 1707.5783       | 854.2928        | 15 | E      | 4  | 540.2065        | 270.6069        |
|         | 1874.5766       | 937.7919        | 16 | S[167] | 3  | 411.1639        | 206.0856        |
|         | 1971.6294       | 986.3183        | 17 | P      | 2  | 244.1656        | 122.5864        |
|         |                 |                 | 18 | K      | 1  | 147.1128        | 74.0600         |

# Annotated spectra from Saleem et. al. 2009

R.ANS<sub>167</sub>-SANLAAKS<sub>167</sub>-S<sub>167</sub>-TSLSNLPAVKE/2

0.9999

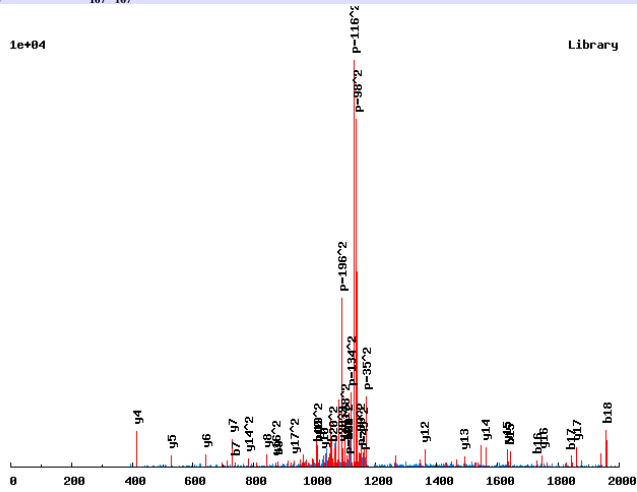

| Library | b <sup>1+</sup> | b <sup>2+</sup> | #  | AA     | #  | y <sup>1+</sup> | y <sup>2+</sup> |
|---------|-----------------|-----------------|----|--------|----|-----------------|-----------------|
|         | 72.0444         | 36.5258         | 1  | A      | 22 |                 |                 |
|         | 186.0873        | 93.5473         | 2  | N      | 21 | 2299.9972       | 1150.5022       |
|         | 353.0857        | 177.0465        | 3  | S[167] | 20 | 2185.9543       | 1093.4808       |
|         | 440.1177        | 220.5625        | 4  | S      | 19 | 2018.9559       | 1009.9816       |
|         | 511.1548        | 256.0811        | 5  | A      | 18 | 1931.9239       | 966.4656        |
|         | 625.1978        | 313.1025        | 6  | N      | 17 | 1860.8868       | 930.9470        |
|         | 738.2818        | 369.6445        | 7  | L      | 16 | 1746.8438       | 873.9256        |
|         | 809.3189        | 405.1631        | 8  | A      | 15 | 1633.7598       | 817.3835        |
|         | 880.3560        | 440.6817        | 9  | A      | 14 | 1562.7227       | 781.8650        |
|         | 1008.4510       | 504.7291        | 10 | K      | 13 | 1491.6856       | 746.3464        |
|         | 1175.4494       | 588.2283        | 11 | S[167] | 12 | 1363.5906       | 682.2989        |
|         | 1342.4477       | 671.7275        | 12 | S[167] | 11 | 1196.5922       | 598.7998        |
|         | 1443.4954       | 722.2513        | 13 | T      | 10 | 1029.5939       | 515.3006        |
|         | 1530.5274       | 765.7674        | 14 | S      | 9  | 928.5462        | 464.7767        |
|         | 1643.6115       | 822.3094        | 15 | L      | 8  | 841.5142        | 421.2607        |
|         | 1730.6435       | 865.8254        | 16 | S      | 7  | 728.4301        | 364.7187        |
|         | 1844.6864       | 922.8469        | 17 | N      | 6  | 641.3981        | 321.2027        |
|         | 1957.7705       | 979.3889        | 18 | L      | 5  | 527.3551        | 264.1812        |
|         | 2054.8233       | 1027.9153       | 19 | P      | 4  | 414.2711        | 207.6392        |
|         | 2125.8604       | 1063.4338       | 20 | A      | 3  | 317.2183        | 159.1128        |
|         | 2224.9288       | 1112.9680       | 21 | V      | 2  | 246.1812        | 123.5942        |
|         |                 |                 | 22 | K      | 1  | 147.1128        | 74.0600         |



# Annotated spectra from Saleem et. al. 2009

R.ANS<sub>167</sub>STLIHQLS<sub>167</sub>R.Q/2

0.9781

1e+04

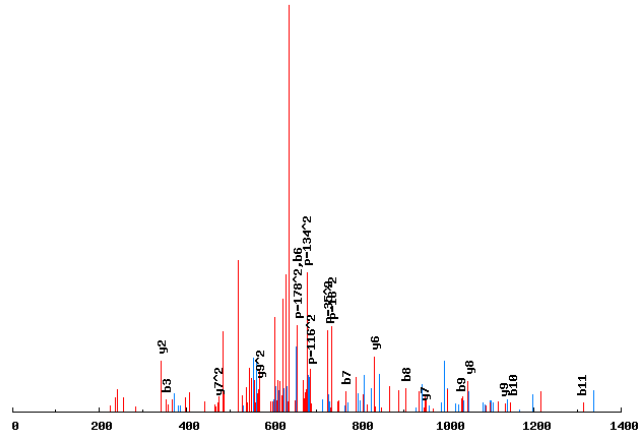

| Library | b <sup>1+</sup> | b <sup>2+</sup> | #  | AA     | #  | y <sup>1+</sup> | y <sup>2+</sup> |
|---------|-----------------|-----------------|----|--------|----|-----------------|-----------------|
|         | 72.0444         | 36.5258         | 1  | A      | 12 |                 |                 |
|         | 186.0873        | 93.5473         | 2  | N      | 11 | 1415.6080       | 708.3076        |
|         | 353.0857        | 177.0465        | 3  | S[167] | 10 | 1301.5651       | 651.2862        |
|         | 440.1177        | 220.5625        | 4  | S      | 9  | 1134.5667       | 567.7870        |
|         | 541.1654        | 271.0863        | 5  | T      | 8  | 1047.5347       | 524.2710        |
|         | 654.2495        | 327.6284        | 6  | L      | 7  | 946.4870        | 473.7471        |
|         | 767.3335        | 384.1704        | 7  | I      | 6  | 833.4029        | 417.2051        |
|         | 904.3924        | 452.6999        | 8  | H      | 5  | 720.3189        | 360.6631        |
|         | 1032.4510       | 516.7291        | 9  | Q      | 4  | 583.2600        | 292.1336        |
|         | 1145.5351       | 573.2712        | 10 | L      | 3  | 455.2014        | 228.1043        |
|         | 1312.5334       | 656.7704        | 11 | S[167] | 2  | 342.1173        | 171.5623        |
|         |                 |                 | 12 | R      | 1  | 175.1190        | 88.0631         |

# Annotated spectra from Saleem et. al. 2009

K.ANSS<sub>167</sub>T<sub>181</sub>TT<sub>181</sub>LDAIKPNSK.N/2

0.9683

1e+04

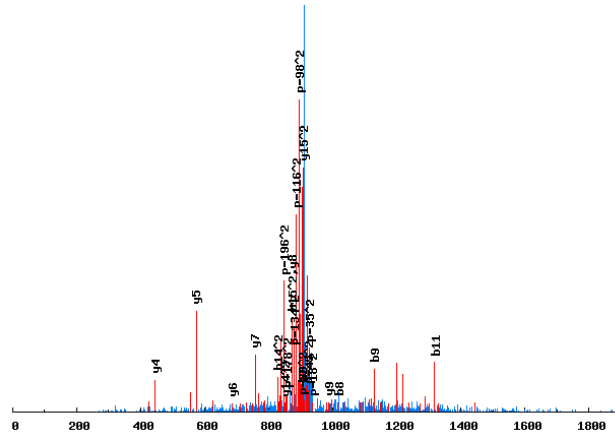

| Library | b <sup>1+</sup> | b <sup>2+</sup> | #  | AA     | #  | y <sup>1+</sup> | y <sup>2+</sup> |
|---------|-----------------|-----------------|----|--------|----|-----------------|-----------------|
|         | 72.0444         | 36.5258         | 1  | A      | 16 |                 |                 |
|         | 186.0873        | 93.5473         | 2  | N      | 15 | 1816.7167       | 908.8620        |
|         | 273.1193        | 137.0633        | 3  | S      | 14 | 1702.6737       | 851.8405        |
|         | 440.1177        | 220.5625        | 4  | S[167] | 13 | 1615.6417       | 808.3245        |
|         | 621.1317        | 311.0695        | 5  | T[181] | 12 | 1448.6434       | 724.8253        |
|         | 722.1794        | 361.5933        | 6  | T      | 11 | 1267.6293       | 634.3183        |
|         | 903.1934        | 452.1003        | 7  | T[181] | 10 | 1166.5817       | 583.7945        |
|         | 1016.2775       | 508.6424        | 8  | L      | 9  | 985.5677        | 493.2875        |
|         | 1131.3044       | 566.1558        | 9  | D      | 8  | 872.4836        | 436.7454        |
|         | 1202.3415       | 601.6744        | 10 | A      | 7  | 757.4567        | 379.2320        |
|         | 1315.4256       | 658.2164        | 11 | I      | 6  | 686.4195        | 343.7134        |
|         | 1443.5205       | 722.2639        | 12 | K      | 5  | 573.3355        | 287.1714        |
|         | 1540.5733       | 770.7903        | 13 | P      | 4  | 445.2405        | 223.1239        |
|         | 1654.6162       | 827.8118        | 14 | N      | 3  | 348.1878        | 174.5975        |
|         | 1741.6483       | 871.3278        | 15 | S      | 2  | 234.1448        | 117.5761        |
|         |                 |                 | 16 | K      | 1  | 147.1128        | 74.0600         |

# Annotated spectra from Saleem et. al. 2009

K.ANSS<sub>167</sub>T<sub>181</sub>TTLDAIKPNSK.N/3

0.9958

1e+04

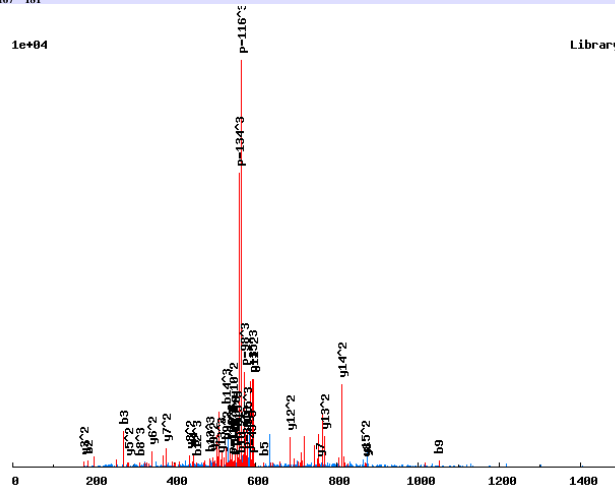

| Library | b <sup>1+</sup> | b <sup>2+</sup> | b <sup>3+</sup> | #  | AA     | #  | y <sup>1+</sup> | y <sup>2+</sup> | y <sup>3+</sup> |
|---------|-----------------|-----------------|-----------------|----|--------|----|-----------------|-----------------|-----------------|
|         | 72.0444         | 36.5258         | 24.6863         | 1  | A      | 16 |                 |                 |                 |
|         | 186.0873        | 93.5473         | 62.7006         | 2  | N      | 15 | 1736.7503       | 868.8788        | 579.5883        |
|         | 273.1193        | 137.0633        | 91.7113         | 3  | S      | 14 | 1622.7074       | 811.8573        | 541.5740        |
|         | 440.1177        | 220.5625        | 147.3774        | 4  | S[167] | 13 | 1535.6754       | 768.3413        | 512.5633        |
|         | 621.1317        | 311.0695        | 207.7154        | 5  | T[181] | 12 | 1368.6770       | 684.8422        | 456.8972        |
|         | 722.1794        | 361.5933        | 241.3980        | 6  | T      | 11 | 1187.6630       | 594.3351        | 396.5592        |
|         | 823.2271        | 412.1172        | 275.0805        | 7  | T      | 10 | 1086.6153       | 543.8113        | 362.8766        |
|         | 936.3111        | 468.6592        | 312.7752        | 8  | L      | 9  | 985.5677        | 493.2875        | 329.1941        |
|         | 1051.3381       | 526.1727        | 351.1175        | 9  | D      | 8  | 872.4836        | 436.7454        | 291.4994        |
|         | 1122.3752       | 561.6912        | 374.7966        | 10 | A      | 7  | 757.4567        | 379.2320        | 253.1571        |
|         | 1235.4593       | 618.2333        | 412.4913        | 11 | I      | 6  | 686.4195        | 343.7134        | 229.4780        |
|         | 1363.5542       | 682.2807        | 455.1896        | 12 | K      | 5  | 573.3355        | 287.1714        | 191.7833        |
|         | 1460.6070       | 730.8071        | 487.5405        | 13 | P      | 4  | 445.2405        | 223.1239        | 149.0850        |
|         | 1574.6499       | 787.8286        | 525.5548        | 14 | N      | 3  | 348.1878        | 174.5975        | 116.7341        |
|         | 1661.6819       | 831.3446        | 554.5655        | 15 | S      | 2  | 234.1448        | 117.5761        | 78.7198         |
|         |                 |                 |                 | 16 | K      | 1  | 147.1128        | 74.0600         | 49.7091         |

# Annotated spectra from Saleem et. al. 2009

R.APS<sub>167</sub>SVS<sub>167</sub>MVS<sub>167</sub>PPPLHK.N/2

0.6402

1e+04

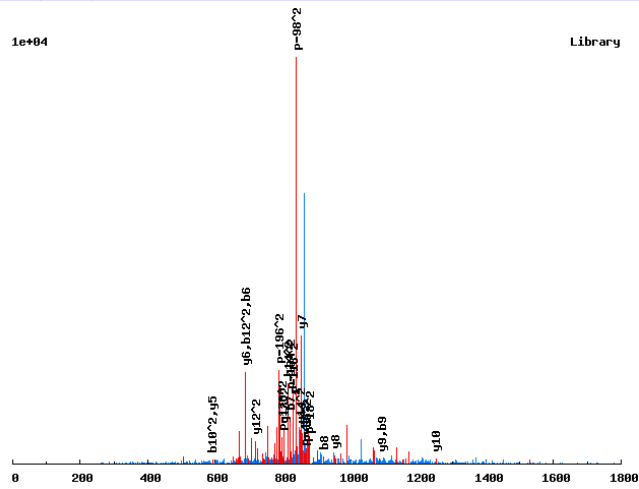

| Library | b <sup>1+</sup> | b <sup>2+</sup> | #  | AA     | #  | y <sup>1+</sup> | y <sup>2+</sup> |
|---------|-----------------|-----------------|----|--------|----|-----------------|-----------------|
|         | 72.0444         | 36.5258         | 1  | A      | 15 |                 |                 |
|         | 169.0972        | 85.0522         | 2  | P      | 14 | 1702.6712       | 851.8393        |
|         | 336.0955        | 168.5514        | 3  | S[167] | 13 | 1605.6185       | 803.3129        |
|         | 423.1275        | 212.0674        | 4  | S      | 12 | 1438.6201       | 719.8137        |
|         | 522.1960        | 261.6016        | 5  | V      | 11 | 1351.5881       | 676.2977        |
|         | 689.1943        | 345.1008        | 6  | S[167] | 10 | 1252.5197       | 626.7635        |
|         | 820.2348        | 410.6210        | 7  | M      | 9  | 1085.5213       | 543.2643        |
|         | 919.3032        | 460.1552        | 8  | V      | 8  | 954.4808        | 477.7441        |
|         | 1086.3016       | 543.6544        | 9  | S[167] | 7  | 855.4124        | 428.2098        |
|         | 1183.3543       | 592.1808        | 10 | P      | 6  | 688.4141        | 344.7107        |
|         | 1280.4071       | 640.7072        | 11 | P      | 5  | 591.3613        | 296.1843        |
|         | 1377.4599       | 689.2336        | 12 | P      | 4  | 494.3085        | 247.6579        |
|         | 1490.5439       | 745.7756        | 13 | L      | 3  | 397.2558        | 199.1315        |
|         | 1627.6028       | 814.3051        | 14 | H      | 2  | 284.1717        | 142.5895        |
|         |                 |                 | 15 | K      | 1  | 147.1128        | 74.0600         |

# Annotated spectra from Saleem et. al. 2009

R.APSS<sub>167</sub>VSMVSPPLHK<sub>136</sub>NS<sub>167</sub>R<sub>166</sub>V/3

0.6411

1e+04

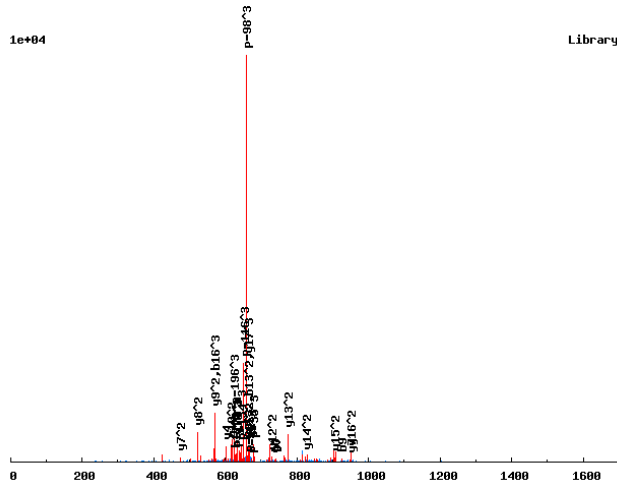

| Library | b <sup>1+</sup> | b <sup>2+</sup> | b <sup>3+</sup> | #  | AA     | #  | y <sup>1+</sup> | y <sup>2+</sup> | y <sup>3+</sup> |
|---------|-----------------|-----------------|-----------------|----|--------|----|-----------------|-----------------|-----------------|
|         | 72.0444         | 36.5258         | 24.6863         | 1  | A      | 18 |                 |                 |                 |
|         | 169.0972        | 85.0522         | 57.0372         | 2  | P      | 17 | 1997.9034       | 999.4554        | 666.6393        |
|         | 256.1292        | 128.5682        | 86.0479         | 3  | S      | 16 | 1900.8507       | 950.9290        | 634.2884        |
|         | 423.1275        | 212.0674        | 141.7140        | 4  | S[167] | 15 | 1813.8187       | 907.4130        | 605.2777        |
|         | 522.1960        | 261.6016        | 174.7368        | 5  | V      | 14 | 1646.8203       | 823.9138        | 549.6116        |
|         | 609.2280        | 305.1176        | 203.7475        | 6  | S      | 13 | 1547.7519       | 774.3796        | 516.5888        |
|         | 740.2685        | 370.6379        | 247.4277        | 7  | M      | 12 | 1460.7198       | 730.8636        | 487.5781        |
|         | 839.3369        | 420.1721        | 280.4505        | 8  | V      | 11 | 1329.6794       | 665.3433        | 443.8980        |
|         | 926.3689        | 463.6881        | 309.4612        | 9  | S      | 10 | 1230.6109       | 615.8091        | 410.8752        |
|         | 1023.4217       | 512.2145        | 341.8121        | 10 | P      | 9  | 1143.5789       | 572.2931        | 381.8645        |
|         | 1120.4744       | 560.7409        | 374.1630        | 11 | P      | 8  | 1046.5262       | 523.7667        | 349.5136        |
|         | 1217.5272       | 609.2672        | 406.5139        | 12 | P      | 7  | 949.4734        | 475.2403        | 317.1627        |
|         | 1330.6113       | 665.8093        | 444.2086        | 13 | L      | 6  | 852.4206        | 426.7140        | 284.8117        |
|         | 1467.6702       | 734.3387        | 489.8949        | 14 | H      | 5  | 739.3366        | 370.1719        | 247.1170        |
|         | 1603.7793       | 802.3933        | 535.2646        | 15 | K[136] | 4  | 602.2777        | 301.6425        | 201.4307        |
|         | 1717.8222       | 859.4148        | 573.2789        | 16 | N      | 3  | 466.1685        | 233.5879        | 156.0610        |
|         | 1884.8206       | 942.9139        | 628.9451        | 17 | S[167] | 2  | 352.1256        | 176.5664        | 118.0467        |
|         |                 |                 |                 | 18 | R[166] | 1  | 185.1272        | 93.0672         | 62.3806         |

# Annotated spectra from Saleem et. al. 2009

K.APVAS<sub>167</sub>PRPAATPNLSK.D/3

0.9994

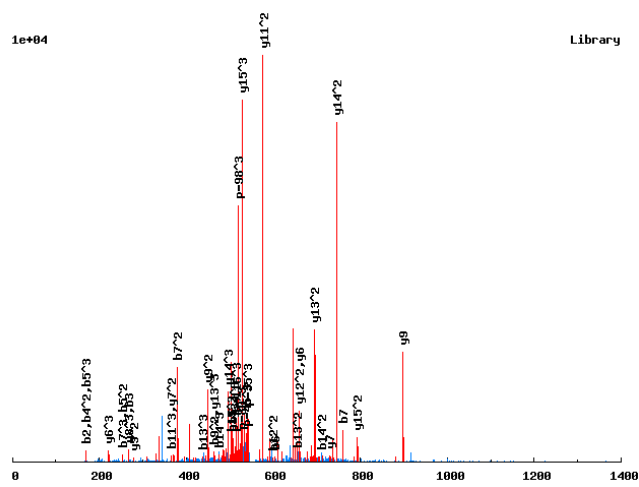

| Library | b <sup>1+</sup> | b <sup>2+</sup> | b <sup>3+</sup> | #  | AA     | #  | y <sup>1+</sup> | y <sup>2+</sup> | y <sup>3+</sup> |
|---------|-----------------|-----------------|-----------------|----|--------|----|-----------------|-----------------|-----------------|
|         | 72.0444         | 36.5258         | 24.6863         | 1  | A      | 16 |                 |                 |                 |
|         | 169.0972        | 85.0522         | 57.0372         | 2  | P      | 15 | 1585.8098       | 793.4085        | 529.2748        |
|         | 268.1656        | 134.5864        | 90.0600         | 3  | V      | 14 | 1488.7570       | 744.8821        | 496.9239        |
|         | 339.2027        | 170.1050        | 113.7391        | 4  | A      | 13 | 1389.6886       | 695.3479        | 463.9010        |
|         | 506.2010        | 253.6042        | 169.4052        | 5  | S[167] | 12 | 1318.6515       | 659.8294        | 440.2220        |
|         | 603.2538        | 302.1305        | 201.7561        | 6  | P      | 11 | 1151.6531       | 576.3302        | 384.5559        |
|         | 759.3549        | 380.1811        | 253.7898        | 7  | R      | 10 | 1054.6003       | 527.8038        | 352.2050        |
|         | 856.4077        | 428.7075        | 286.1407        | 8  | P      | 9  | 898.4992        | 449.7533        | 300.1713        |
|         | 927.4448        | 464.2260        | 309.8198        | 9  | A      | 8  | 801.4465        | 401.2269        | 267.8203        |
|         | 998.4819        | 499.7446        | 333.4988        | 10 | A      | 7  | 730.4094        | 365.7083        | 244.1413        |
|         | 1099.5296       | 550.2684        | 367.1814        | 11 | T      | 6  | 659.3723        | 330.1898        | 220.4623        |
|         | 1196.5823       | 598.7948        | 399.5323        | 12 | P      | 5  | 558.3246        | 279.6659        | 186.7797        |
|         | 1310.6253       | 655.8163        | 437.5466        | 13 | N      | 4  | 461.2718        | 231.1395        | 154.4288        |
|         | 1423.7093       | 712.3583        | 475.2413        | 14 | L      | 3  | 347.2289        | 174.1181        | 116.4145        |
|         | 1510.7413       | 755.8743        | 504.2520        | 15 | S      | 2  | 234.1448        | 117.5761        | 78.7198         |
|         |                 |                 |                 | 16 | K      | 1  | 147.1128        | 74.0600         | 49.7091         |

# Annotated spectra from Saleem et. al. 2009

K.APVAS<sub>167</sub>PRPAATPNLS<sub>167</sub>KDK.K/3

0.9976

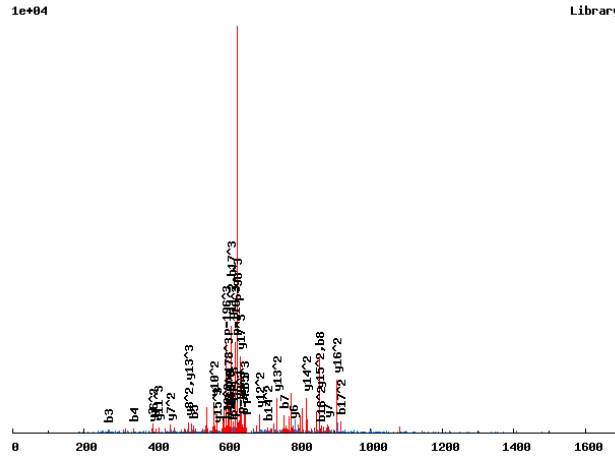

| Library | b <sup>1+</sup> | b <sup>2+</sup> | b <sup>3+</sup> | #  | AA     | #  | y <sup>1+</sup> | y <sup>2+</sup> | y <sup>3+</sup> |
|---------|-----------------|-----------------|-----------------|----|--------|----|-----------------|-----------------|-----------------|
|         | 72.0444         | 36.5258         | 24.6863         | 1  | A      | 18 |                 |                 |                 |
|         | 169.0972        | 85.0522         | 57.0372         | 2  | P      | 17 | 1908.8980       | 954.9526        | 636.9708        |
|         | 268.1656        | 134.5864        | 90.0600         | 3  | V      | 16 | 1811.8452       | 906.4263        | 604.6199        |
|         | 339.2027        | 170.1050        | 113.7391        | 4  | A      | 15 | 1712.7768       | 856.8920        | 571.5971        |
|         | 506.2010        | 253.6042        | 169.4052        | 5  | S[167] | 14 | 1641.7397       | 821.3735        | 547.9181        |
|         | 603.2538        | 302.1305        | 201.7561        | 6  | P      | 13 | 1474.7413       | 737.8743        | 492.2520        |
|         | 759.3549        | 380.1811        | 253.7898        | 7  | R      | 12 | 1377.6886       | 689.3479        | 459.9010        |
|         | 856.4077        | 428.7075        | 286.1407        | 8  | P      | 11 | 1221.5875       | 611.2974        | 407.8673        |
|         | 927.4448        | 464.2260        | 309.8198        | 9  | A      | 10 | 1124.5347       | 562.7710        | 375.5164        |
|         | 998.4819        | 499.7446        | 333.4988        | 10 | A      | 9  | 1053.4976       | 527.2524        | 351.8374        |
|         | 1099.5296       | 550.2684        | 367.1814        | 11 | T      | 8  | 982.4605        | 491.7339        | 328.1584        |
|         | 1196.5823       | 598.7948        | 399.5323        | 12 | P      | 7  | 881.4128        | 441.2100        | 294.4758        |
|         | 1310.6253       | 655.8163        | 437.5466        | 13 | N      | 6  | 784.3601        | 392.6837        | 262.1249        |
|         | 1423.7093       | 712.3583        | 475.2413        | 14 | L      | 5  | 670.3171        | 335.6622        | 224.1106        |
|         | 1590.7077       | 795.8575        | 530.9074        | 15 | S[167] | 4  | 557.2331        | 279.1202        | 186.4159        |
|         | 1718.8026       | 859.9050        | 573.6057        | 16 | K      | 3  | 390.2347        | 195.6210        | 130.7498        |
|         | 1833.8296       | 917.4184        | 611.9480        | 17 | D      | 2  | 262.1397        | 131.5735        | 88.0514         |
|         |                 |                 |                 | 18 | K      | 1  | 147.1128        | 74.0600         | 49.7091         |

# Annotated spectra from Saleem et. al. 2009

K.APVAS<sub>167</sub>PRPAAT<sub>181</sub>PNLS<sub>167</sub>KDKK.K/3

0.8922

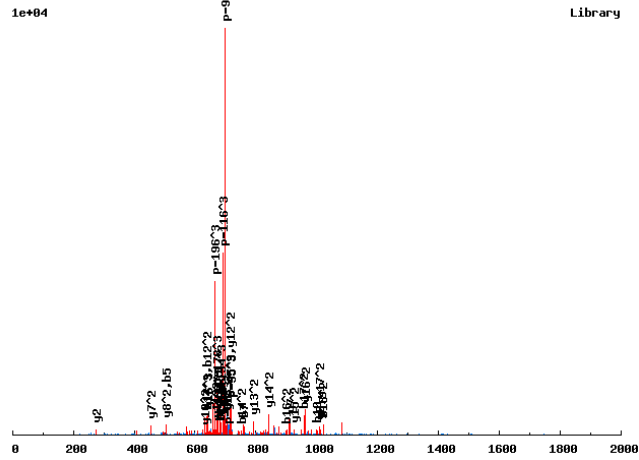

| Library | b <sup>1+</sup> | b <sup>2+</sup> | b <sup>3+</sup> | #  | AA     | #  | y <sup>1+</sup> | y <sup>2+</sup> | y <sup>3+</sup> |
|---------|-----------------|-----------------|-----------------|----|--------|----|-----------------|-----------------|-----------------|
|         | 72.0444         | 36.5258         | 24.6863         | 1  | A      | 19 |                 |                 |                 |
|         | 169.0972        | 85.0522         | 57.0372         | 2  | P      | 18 | 2116.9593       | 1058.9833       | 706.3246        |
|         | 268.1656        | 134.5864        | 90.0600         | 3  | V      | 17 | 2019.9065       | 1010.4569       | 673.9737        |
|         | 339.2027        | 170.1050        | 113.7391        | 4  | A      | 16 | 1920.8381       | 960.9227        | 640.9509        |
|         | 506.2010        | 253.6042        | 169.4052        | 5  | S[167] | 15 | 1849.8010       | 925.4041        | 617.2719        |
|         | 603.2538        | 302.1305        | 201.7561        | 6  | P      | 14 | 1682.8026       | 841.9050        | 561.6057        |
|         | 759.3549        | 380.1811        | 253.7898        | 7  | R      | 13 | 1585.7499       | 793.3786        | 529.2548        |
|         | 856.4077        | 428.7075        | 286.1407        | 8  | P      | 12 | 1429.6488       | 715.3280        | 477.2211        |
|         | 927.4448        | 464.2260        | 309.8198        | 9  | A      | 11 | 1332.5960       | 666.8016        | 444.8702        |
|         | 998.4819        | 499.7446        | 333.4988        | 10 | A      | 10 | 1261.5589       | 631.2831        | 421.1912        |
|         | 1179.4956       | 590.2516        | 393.8368        | 11 | T[181] | 9  | 1190.5218       | 595.7645        | 397.5121        |
|         | 1276.5487       | 638.7780        | 426.1877        | 12 | P      | 8  | 1009.5078       | 505.2575        | 337.1741        |
|         | 1390.5916       | 695.7994        | 464.2020        | 13 | N      | 7  | 912.4550        | 456.7311        | 304.8232        |
|         | 1503.6756       | 752.3415        | 501.8967        | 14 | L      | 6  | 798.4121        | 399.7097        | 266.8089        |
|         | 1670.6740       | 835.8406        | 557.5629        | 15 | S[167] | 5  | 685.3280        | 343.1677        | 229.1142        |
|         | 1798.7690       | 899.8881        | 600.2612        | 16 | K      | 4  | 518.3297        | 259.6685        | 173.4481        |
|         | 1913.7959       | 957.4016        | 638.6035        | 17 | D      | 3  | 390.2347        | 195.6210        | 130.7498        |
|         | 2041.8909       | 1021.4491       | 681.3018        | 18 | K      | 2  | 275.2078        | 138.1075        | 92.4074         |
|         |                 |                 |                 | 19 | K      | 1  | 147.1128        | 74.0600         | 49.7091         |



# Annotated spectra from Saleem et. al. 2009

M.APVVIS<sub>167</sub>ES<sub>167</sub>EEEDR.V/2

0.6583

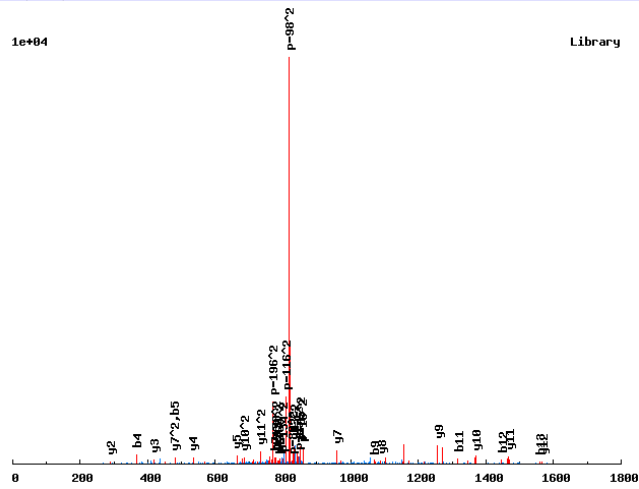

| Library | b <sup>1+</sup> | b <sup>2+</sup> | #  | AA     | #  | y <sup>1+</sup> | y <sup>2+</sup> |
|---------|-----------------|-----------------|----|--------|----|-----------------|-----------------|
|         | 72.0444         | 36.5258         | 1  | A      | 14 |                 |                 |
|         | 169.0972        | 85.0522         | 2  | P      | 13 | 1663.6136       | 832.3104        |
|         | 268.1656        | 134.5864        | 3  | V      | 12 | 1566.5608       | 783.7840        |
|         | 367.2340        | 184.1206        | 4  | V      | 11 | 1467.4924       | 734.2498        |
|         | 480.3180        | 240.6627        | 5  | I      | 10 | 1368.4240       | 684.7156        |
|         | 647.3164        | 324.1618        | 6  | S[167] | 9  | 1255.3399       | 628.1736        |
|         | 776.3590        | 388.6831        | 7  | E      | 8  | 1088.3416       | 544.6744        |
|         | 943.3573        | 472.1823        | 8  | S[167] | 7  | 959.2990        | 480.1531        |
|         | 1072.3999       | 536.7036        | 9  | E      | 6  | 792.3006        | 396.6539        |
|         | 1201.4425       | 601.2249        | 10 | E      | 5  | 663.2580        | 332.1326        |
|         | 1316.4695       | 658.7384        | 11 | D      | 4  | 534.2154        | 267.6114        |
|         | 1445.5121       | 723.2597        | 12 | E      | 3  | 419.1885        | 210.0979        |
|         | 1560.5390       | 780.7731        | 13 | D      | 2  | 290.1459        | 145.5766        |
|         |                 |                 | 14 | R      | 1  | 175.1190        | 88.0631         |

# Annotated spectra from Saleem et. al. 2009

K.APYSS<sub>167</sub>NS<sub>167</sub>TLNEVNK.R/2

0.9996

1e+04

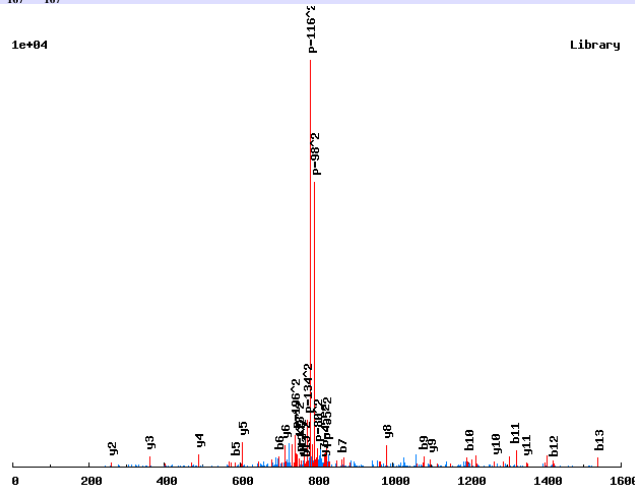

| Library | b <sup>1+</sup> | b <sup>2+</sup> | #  | AA     | #  | y <sup>1+</sup> | y <sup>2+</sup> |
|---------|-----------------|-----------------|----|--------|----|-----------------|-----------------|
|         | 72.0444         | 36.5258         | 1  | A      | 14 |                 |                 |
|         | 169.0972        | 85.0522         | 2  | P      | 13 | 1612.6292       | 806.8182        |
|         | 332.1605        | 166.5839        | 3  | Y      | 12 | 1515.5764       | 758.2918        |
|         | 419.1925        | 210.0999        | 4  | S      | 11 | 1352.5131       | 676.7602        |
|         | 586.1909        | 293.5991        | 5  | S[167] | 10 | 1265.4811       | 633.2442        |
|         | 700.2338        | 350.6205        | 6  | N      | 9  | 1098.4827       | 549.7450        |
|         | 867.2322        | 434.1197        | 7  | S[167] | 8  | 984.4398        | 492.7235        |
|         | 968.2798        | 484.6436        | 8  | T      | 7  | 817.4414        | 409.2243        |
|         | 1081.3639       | 541.1856        | 9  | L      | 6  | 716.3937        | 358.7005        |
|         | 1195.4068       | 598.2071        | 10 | N      | 5  | 603.3097        | 302.1585        |
|         | 1324.4494       | 662.7284        | 11 | E      | 4  | 489.2667        | 245.1370        |
|         | 1423.5178       | 712.2626        | 12 | V      | 3  | 360.2241        | 180.6157        |
|         | 1537.5608       | 769.2840        | 13 | N      | 2  | 261.1557        | 131.0815        |
|         |                 |                 | 14 | K      | 1  | 147.1128        | 74.0600         |

# Annotated spectra from Saleem et. al. 2009

R.AQSGS<sub>167</sub>RYTFDDDDDDYGTGYSR.N/3

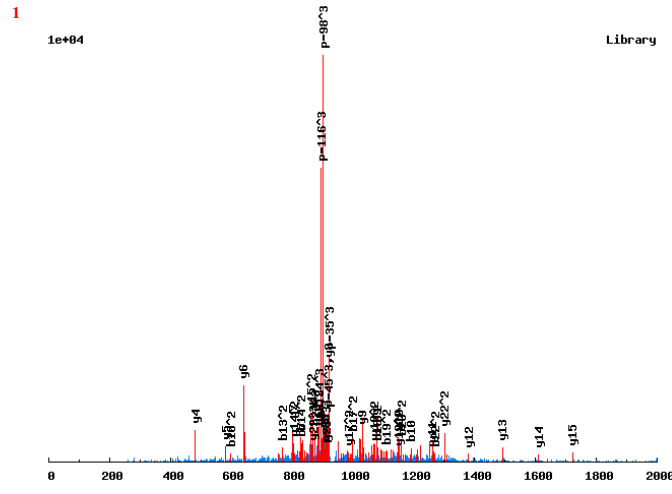

| Library | b <sup>1+</sup> | b <sup>2+</sup> | b <sup>3+</sup> | #  | AA     | #  | y <sup>1+</sup> | y <sup>2+</sup> | y <sup>3+</sup> |
|---------|-----------------|-----------------|-----------------|----|--------|----|-----------------|-----------------|-----------------|
|         | 72.0444         | 36.5258         | 24.6863         | 1  | A      | 24 |                 |                 |                 |
|         | 200.1030        | 100.5551        | 67.3725         | 2  | Q      | 23 | 2729.9747       | 1365.4910       | 910.6631        |
|         | 287.1350        | 144.0711        | 96.3832         | 3  | S      | 22 | 2601.9161       | 1301.4617       | 867.9769        |
|         | 344.1565        | 172.5819        | 115.3903        | 4  | G      | 21 | 2514.8841       | 1257.9457       | 838.9662        |
|         | 511.1548        | 256.0811        | 171.0565        | 5  | S[167] | 20 | 2457.8627       | 1229.4350       | 819.9591        |
|         | 667.2559        | 334.1316        | 223.0902        | 6  | R      | 19 | 2290.8643       | 1145.9358       | 764.2929        |
|         | 830.3193        | 415.6633        | 277.4446        | 7  | Y      | 18 | 2134.7632       | 1067.8852       | 712.2592        |
|         | 931.3669        | 466.1871        | 311.1272        | 8  | T      | 17 | 1971.6998       | 986.3536        | 657.9048        |
|         | 1078.4354       | 539.7213        | 360.1500        | 9  | F      | 16 | 1870.6522       | 935.8297        | 624.2222        |
|         | 1193.4623       | 597.2348        | 398.4923        | 10 | D      | 15 | 1723.5838       | 862.2955        | 575.1994        |
|         | 1308.4892       | 654.7483        | 436.8346        | 11 | D      | 14 | 1608.5568       | 804.7820        | 536.8571        |
|         | 1423.5162       | 712.2617        | 475.1769        | 12 | D      | 13 | 1493.5299       | 747.2686        | 498.5148        |
|         | 1538.5431       | 769.7752        | 513.5192        | 13 | D      | 12 | 1378.5029       | 689.7551        | 460.1725        |
|         | 1653.5701       | 827.2887        | 551.8615        | 14 | D      | 11 | 1263.4760       | 632.2416        | 421.8302        |
|         | 1768.5970       | 884.8021        | 590.2039        | 15 | D      | 10 | 1148.4491       | 574.7282        | 383.4879        |
|         | 1883.6239       | 942.3156        | 628.5462        | 16 | D      | 9  | 1033.4221       | 517.2147        | 345.1456        |
|         | 1998.6509       | 999.8291        | 666.8885        | 17 | D      | 8  | 918.3952        | 459.7012        | 306.8032        |
|         | 2161.7142       | 1081.3607       | 721.2429        | 18 | Y      | 7  | 803.3682        | 402.1878        | 268.4609        |
|         | 2218.7357       | 1109.8715       | 740.2501        | 19 | G      | 6  | 640.3049        | 320.6561        | 214.1065        |
|         | 2319.7833       | 1160.3953       | 773.9326        | 20 | T      | 5  | 583.2835        | 292.1454        | 195.0993        |
|         | 2376.8048       | 1188.9060       | 792.9398        | 21 | G      | 4  | 482.2358        | 241.6215        | 161.4168        |
|         | 2539.8681       | 1270.4377       | 847.2942        | 22 | Y      | 3  | 425.2143        | 213.1108        | 142.4096        |
|         | 2626.9002       | 1313.9537       | 876.3049        | 23 | S      | 2  | 262.1510        | 131.5791        | 88.0552         |
|         |                 |                 |                 | 24 | R      | 1  | 175.1190        | 88.0631         | 59.0445         |

# Annotated spectra from Saleem et. al. 2009

R.ARDDAEDEEDPDTRSS<sub>167</sub>GK.K/3

0.9015

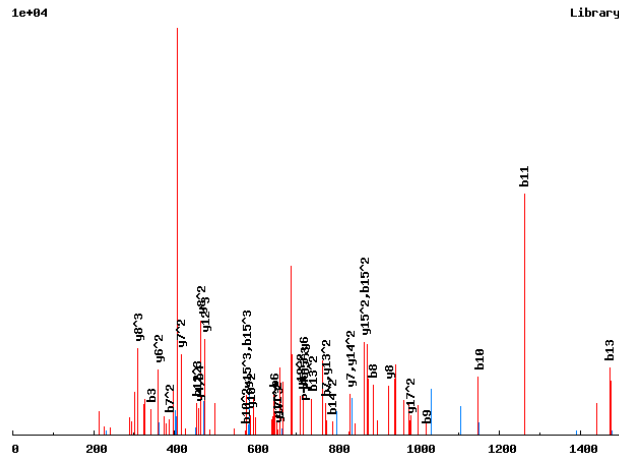

| Library | b <sup>1+</sup>  | b <sup>2+</sup> | b <sup>3+</sup> | #  | AA     | #  | y <sup>1+</sup> | y <sup>2+</sup> | y <sup>3+</sup> |
|---------|------------------|-----------------|-----------------|----|--------|----|-----------------|-----------------|-----------------|
|         | 72.0444          | 36.5258         | 24.6863         | 1  | A      | 19 |                 |                 |                 |
|         | 228.1455         | 114.5764        | 76.7200         | 2  | R      | 18 | 2116.7938       | 1058.9006       | 706.2695        |
|         | <b>343.1724</b>  | 172.0899        | 115.0623        | 3  | D      | 17 | 1960.6927       | <b>980.8500</b> | <b>654.2358</b> |
|         | <b>458.1994</b>  | 229.6033        | 153.4046        | 4  | D      | 16 | 1845.6658       | 923.3365        | 615.8934        |
|         | 529.2365         | 265.1219        | 177.0837        | 5  | A      | 15 | 1730.6388       | <b>865.8231</b> | <b>577.5511</b> |
|         | <b>644.2634</b>  | 322.6354        | 215.4260        | 6  | D      | 14 | 1659.6017       | <b>830.3045</b> | 553.8721        |
|         | <b>773.3060</b>  | <b>387.1567</b> | 258.4402        | 7  | E      | 13 | 1544.5748       | <b>772.7910</b> | 515.5298        |
|         | <b>888.3330</b>  | 444.6701        | 296.7825        | 8  | D      | 12 | 1415.5322       | <b>708.2697</b> | <b>472.5156</b> |
|         | <b>1017.3755</b> | 509.1914        | 339.7967        | 9  | E      | 11 | 1300.5053       | <b>650.7563</b> | 434.1733        |
|         | <b>1146.4181</b> | <b>573.7127</b> | 382.8109        | 10 | E      | 10 | 1171.4627       | <b>586.2350</b> | 391.1591        |
|         | <b>1261.4451</b> | 631.2262        | 421.1532        | 11 | D      | 9  | 1042.4201       | 521.7137        | 348.1449        |
|         | 1358.4978        | 679.7526        | <b>453.5041</b> | 12 | P      | 8  | <b>927.3931</b> | <b>464.2002</b> | <b>309.8026</b> |
|         | <b>1473.5248</b> | <b>737.2660</b> | 491.8464        | 13 | D      | 7  | <b>830.3404</b> | <b>415.6738</b> | 277.4516        |
|         | 1574.5725        | <b>787.7899</b> | 525.5290        | 14 | T      | 6  | <b>715.3134</b> | <b>358.1604</b> | 239.1093        |
|         | 1730.6736        | <b>865.8404</b> | <b>577.5627</b> | 15 | R      | 5  | 614.2658        | 307.6365        | 205.4268        |
|         | 1817.7056        | 909.3564        | 606.5734        | 16 | S      | 4  | <b>458.1647</b> | 229.5860        | 153.3931        |
|         | 1984.7040        | 992.8556        | 662.2395        | 17 | S[167] | 3  | 371.1326        | 186.0700        | 124.3824        |
|         | 2041.7254        | 1021.3664       | 681.2467        | 18 | G      | 2  | 204.1343        | 102.5708        | 68.7163         |
|         |                  |                 |                 | 19 | K      | 1  | 147.1128        | 74.0600         | 49.7091         |

# Annotated spectra from Saleem et. al. 2009

R.ARQS<sub>167</sub>LDLER.V/2

0.9876

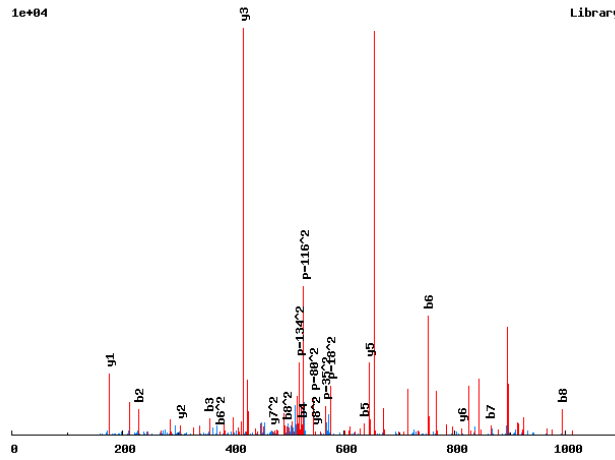

| Library | b <sup>1+</sup> | b <sup>2+</sup> | # | AA     | # | y <sup>1+</sup> | y <sup>2+</sup> |
|---------|-----------------|-----------------|---|--------|---|-----------------|-----------------|
|         | 72.0444         | 36.5258         | 1 | A      | 9 |                 |                 |
|         | 228.1455        | 114.5764        | 2 | R      | 8 | 1096.5147       | 548.7610        |
|         | 356.2041        | 178.6057        | 3 | Q      | 7 | 940.4135        | 470.7104        |
|         | 523.2024        | 262.1049        | 4 | S[167] | 6 | 812.3550        | 406.6811        |
|         | 636.2865        | 318.6469        | 5 | L      | 5 | 645.3566        | 323.1819        |
|         | 751.3134        | 376.1604        | 6 | D      | 4 | 532.2725        | 266.6399        |
|         | 864.3975        | 432.7024        | 7 | L      | 3 | 417.2456        | 209.1264        |
|         | 993.4401        | 497.2237        | 8 | E      | 2 | 304.1615        | 152.5844        |
|         |                 |                 | 9 | R      | 1 | 175.1190        | 88.0631         |

# Annotated spectra from Saleem et. al. 2009

R.ARS<sub>167</sub>-LSESIK.G/2

0.8966

1e+04

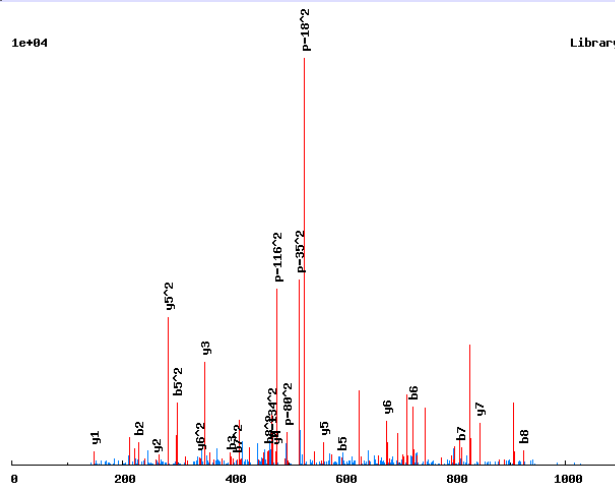

Library

| b <sup>1+</sup> | b <sup>2+</sup> | # | AA     | # | y <sup>1+</sup> | y <sup>2+</sup> |
|-----------------|-----------------|---|--------|---|-----------------|-----------------|
| 72.0444         | 36.5258         | 1 | A      | 9 |                 |                 |
| 228.1455        | 114.5764        | 2 | R      | 8 | 999.4870        | 500.2472        |
| 395.1439        | 198.0756        | 3 | S[167] | 7 | 843.3859        | 422.1966        |
| 508.2279        | 254.6176        | 4 | L      | 6 | 676.3876        | 338.6974        |
| 595.2600        | 298.1336        | 5 | S      | 5 | 563.3035        | 282.1554        |
| 724.3025        | 362.6549        | 6 | E      | 4 | 476.2715        | 238.6394        |
| 811.3346        | 406.1709        | 7 | S      | 3 | 347.2289        | 174.1181        |
| 924.4186        | 462.7130        | 8 | I      | 2 | 260.1969        | 130.6021        |
|                 |                 | 9 | K      | 1 | 147.1128        | 74.0600         |

# Annotated spectra from Saleem et. al. 2009

K.ASDMS<sub>167</sub>KSATPS<sub>167</sub>KEINFDDDF.-/2

0.9063

1e+04

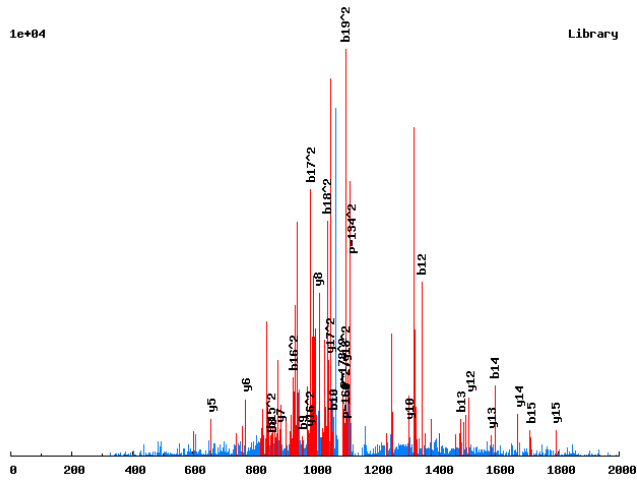

| Library | b <sup>1+</sup> | b <sup>2+</sup> | #  | AA     | #  | y <sup>1+</sup> | y <sup>2+</sup> |
|---------|-----------------|-----------------|----|--------|----|-----------------|-----------------|
|         | 72.0444         | 36.5258         | 1  | A      | 20 |                 |                 |
|         | 159.0764        | 80.0419         | 2  | S      | 19 | 2293.8607       | 1147.4340       |
|         | 274.1034        | 137.5553        | 3  | D      | 18 | 2206.8287       | 1103.9180       |
|         | 405.1438        | 203.0756        | 4  | M      | 17 | 2091.8018       | 1046.4045       |
|         | 572.1422        | 286.5747        | 5  | S[167] | 16 | 1960.7613       | 980.8843        |
|         | 700.2372        | 350.6222        | 6  | K      | 15 | 1793.7629       | 897.3851        |
|         | 787.2692        | 394.1382        | 7  | S      | 14 | 1665.6680       | 833.3376        |
|         | 858.3063        | 429.6568        | 8  | A      | 13 | 1578.6359       | 789.8216        |
|         | 959.3540        | 480.1806        | 9  | T      | 12 | 1507.5988       | 754.3031        |
|         | 1056.4068       | 528.7070        | 10 | P      | 11 | 1406.5511       | 703.7792        |
|         | 1223.4051       | 612.2062        | 11 | S[167] | 10 | 1309.4984       | 655.2528        |
|         | 1351.5001       | 676.2537        | 12 | K      | 9  | 1142.5000       | 571.7536        |
|         | 1480.5427       | 740.7750        | 13 | E      | 8  | 1014.4051       | 507.7062        |
|         | 1593.6267       | 797.3170        | 14 | I      | 7  | 885.3625        | 443.1849        |
|         | 1707.6697       | 854.3385        | 15 | N      | 6  | 772.2784        | 386.6428        |
|         | 1854.7381       | 927.8727        | 16 | F      | 5  | 658.2355        | 329.6214        |
|         | 1969.7650       | 985.3861        | 17 | D      | 4  | 511.1671        | 256.0872        |
|         | 2084.7919       | 1042.8996       | 18 | D      | 3  | 396.1401        | 198.5737        |
|         | 2199.8189       | 1100.4131       | 19 | D      | 2  | 281.1132        | 141.0602        |
|         |                 |                 | 20 | F      | 1  | 166.0863        | 83.5468         |

# Annotated spectra from Saleem et. al. 2009

K.ASDMS<sub>167</sub>KS<sub>167</sub>AT<sub>181</sub>PSKEINFDDDF.-/3

0.9745

1e+04

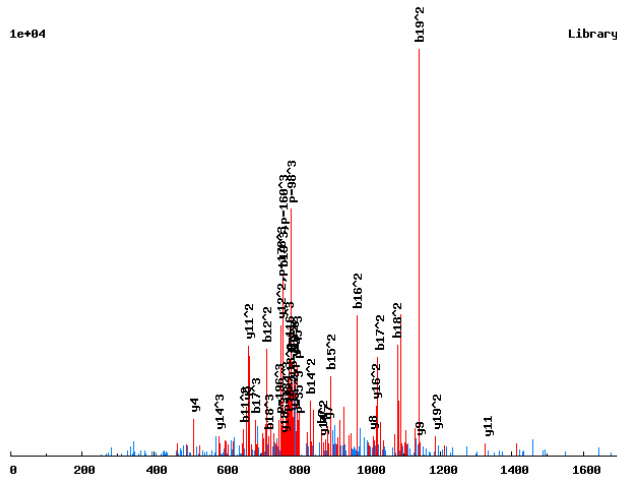

| Library | b <sup>1+</sup> | b <sup>2+</sup> | b <sup>3+</sup> | #  | AA     | #  | y <sup>1+</sup> | y <sup>2+</sup> | y <sup>3+</sup> |
|---------|-----------------|-----------------|-----------------|----|--------|----|-----------------|-----------------|-----------------|
|         | 72.0444         | 36.5258         | 24.6863         | 1  | A      | 20 |                 |                 |                 |
|         | 159.0764        | 80.0419         | 53.6970         | 2  | S      | 19 | 2373.8271       | 1187.4172       | 791.9472        |
|         | 274.1034        | 137.5553        | 92.0393         | 3  | D      | 18 | 2286.7950       | 1143.9012       | 762.9365        |
|         | 405.1438        | 203.0756        | 135.7195        | 4  | M      | 17 | 2171.7681       | 1086.3877       | 724.5942        |
|         | 572.1422        | 286.5747        | 191.3856        | 5  | S[167] | 16 | 2040.7276       | 1020.8674       | 680.9141        |
|         | 700.2372        | 350.6222        | 234.0839        | 6  | K      | 15 | 1873.7293       | 937.3683        | 625.2479        |
|         | 867.2355        | 434.1214        | 289.7500        | 7  | S[167] | 14 | 1745.6343       | 873.3208        | 582.5496        |
|         | 938.2726        | 469.6400        | 313.4291        | 8  | A      | 13 | 1578.6359       | 789.8216        | 526.8835        |
|         | 1119.2867       | 560.1470        | 373.7671        | 9  | T[181] | 12 | 1507.5988       | 754.3031        | 503.2045        |
|         | 1216.3394       | 608.6733        | 406.1180        | 10 | P      | 11 | 1326.5848       | 663.7960        | 442.8665        |
|         | 1303.3714       | 652.1894        | 435.1287        | 11 | S      | 10 | 1229.5321       | 615.2697        | 410.5155        |
|         | 1431.4664       | 716.2368        | 477.8270        | 12 | K      | 9  | 1142.5000       | 571.7536        | 381.5049        |
|         | 1560.5090       | 780.7581        | 520.8412        | 13 | E      | 8  | 1014.4051       | 507.7062        | 338.8065        |
|         | 1673.5931       | 837.3002        | 558.5359        | 14 | I      | 7  | 885.3625        | 443.1849        | 295.7923        |
|         | 1787.6360       | 894.3216        | 596.5502        | 15 | N      | 6  | 772.2784        | 386.6428        | 258.0977        |
|         | 1934.7044       | 967.8558        | 645.5730        | 16 | F      | 5  | 658.2355        | 329.6214        | 220.0833        |
|         | 2049.7313       | 1025.3693       | 683.9153        | 17 | D      | 4  | 511.1671        | 256.0872        | 171.0605        |
|         | 2164.7583       | 1082.8828       | 722.2576        | 18 | D      | 3  | 396.1401        | 198.5737        | 132.7182        |
|         | 2279.7852       | 1140.3962       | 760.5999        | 19 | D      | 2  | 281.1132        | 141.0602        | 94.3759         |
|         |                 |                 |                 | 20 | F      | 1  | 166.0863        | 83.5468         | 56.0336         |



# Annotated spectra from Saleem et. al. 2009

K.ASEALK<sub>136</sub>PDS<sub>167</sub>OK<sub>136</sub>SY<sub>243</sub>AEQ GK<sub>136</sub>E/3

0.998

1e+04

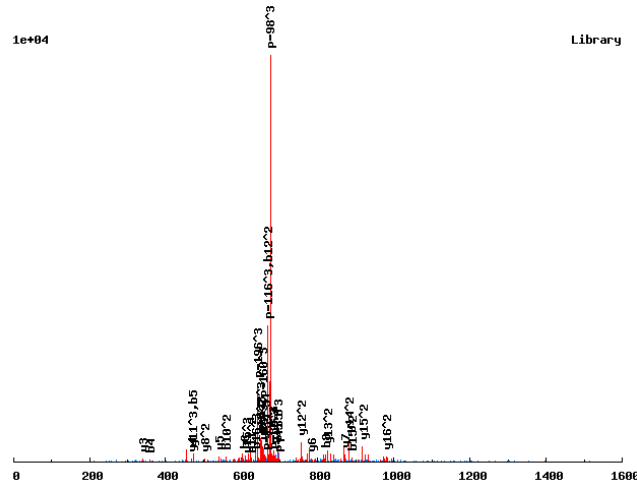

| Library | b <sup>1+</sup> | b <sup>2+</sup> | b <sup>3+</sup> | #  | AA     | #  | y <sup>1+</sup> | y <sup>2+</sup> | y <sup>3+</sup> |
|---------|-----------------|-----------------|-----------------|----|--------|----|-----------------|-----------------|-----------------|
|         | 72.0444         | 36.5258         | 24.6863         | 1  | A      | 18 |                 |                 |                 |
|         | 159.0764        | 80.0419         | 53.6970         | 2  | S      | 17 | 2049.8992       | 1025.4532       | 683.9712        |
|         | 288.1190        | 144.5631        | 96.7112         | 3  | E      | 16 | 1962.8671       | 981.9372        | 654.9606        |
|         | 359.1561        | 180.0817        | 120.3902        | 4  | A      | 15 | 1833.8246       | 917.4159        | 611.9464        |
|         | 472.2402        | 236.6237        | 158.0849        | 5  | L      | 14 | 1762.7874       | 881.8974        | 588.2673        |
|         | 608.3493        | 304.6783        | 203.4546        | 6  | K[136] | 13 | 1649.7034       | 825.3553        | 550.5726        |
|         | 705.4021        | 353.2047        | 235.8056        | 7  | P      | 12 | 1513.5942       | 757.3008        | 505.2029        |
|         | 820.4290        | 410.7182        | 274.1479        | 8  | D      | 11 | 1416.5415       | 708.7744        | 472.8520        |
|         | 987.4274        | 494.2173        | 329.8140        | 9  | S[167] | 10 | 1301.5145       | 651.2609        | 434.5097        |
|         | 1115.4860       | 558.2466        | 372.5002        | 10 | Q      | 9  | 1134.5162       | 567.7617        | 378.8436        |
|         | 1251.5951       | 626.3012        | 417.8699        | 11 | K[136] | 8  | 1006.4576       | 503.7324        | 336.1574        |
|         | 1338.6272       | 669.8172        | 446.8806        | 12 | S      | 7  | 870.3484        | 435.6779        | 290.7877        |
|         | 1581.6568       | 791.3321        | 527.8905        | 13 | Y[243] | 6  | 783.3164        | 392.1618        | 261.7770        |
|         | 1652.6939       | 826.8506        | 551.5695        | 14 | A      | 5  | 540.2867        | 270.6470        | 180.7671        |
|         | 1781.7365       | 891.3719        | 594.5837        | 15 | E      | 4  | 469.2496        | 235.1285        | 157.0881        |
|         | 1909.7951       | 955.4012        | 637.2699        | 16 | Q      | 3  | 340.2070        | 170.6072        | 114.0739        |
|         | 1966.8166       | 983.9119        | 656.2770        | 17 | G      | 2  | 212.1485        | 106.5779        | 71.3877         |
|         |                 |                 |                 | 18 | K[136] | 1  | 155.1270        | 78.0671         | 52.3805         |

## Annotated spectra from Saleem et. al. 2009

R.AS<sub>167</sub>FLS<sub>167</sub>Y<sub>243</sub>S<sub>167</sub>AS<sub>167</sub>K.L/3  
0.9437

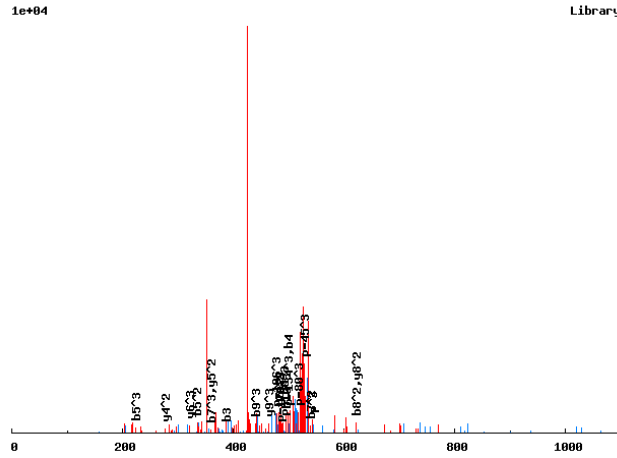

| Library | b <sup>1+</sup> | b <sup>2+</sup> | b <sup>3+</sup> | #  | AA     | #  | y <sup>1+</sup> | y <sup>2+</sup> | y <sup>3+</sup> |
|---------|-----------------|-----------------|-----------------|----|--------|----|-----------------|-----------------|-----------------|
|         | 72.0444         | 36.5258         | 24.6863         | 1  | A      | 11 |                 |                 |                 |
|         | 239.0428        | 120.0250        | 80.3524         | 2  | S[167] | 10 | 1556.3238       | 778.6656        | 519.4461        |
|         | <b>386.1112</b> | 193.5592        | 129.3752        | 3  | F      | 9  | 1389.3255       | 695.1664        | <b>463.7800</b> |
|         | <b>499.1952</b> | 250.1013        | 167.0699        | 4  | L      | 8  | 1242.2571       | <b>621.6322</b> | 414.7572        |
|         | 666.1936        | <b>333.6004</b> | <b>222.7360</b> | 5  | S[167] | 7  | 1129.1730       | 565.0901        | 377.0625        |
|         | 909.2232        | 455.1153        | 303.7459        | 6  | Y[243] | 6  | 962.1747        | <b>481.5910</b> | <b>321.3964</b> |
|         | 1076.2216       | <b>538.6144</b> | <b>359.4121</b> | 7  | S[167] | 5  | 719.1450        | <b>360.0761</b> | 240.3865        |
|         | 1243.2200       | <b>622.1136</b> | 415.0782        | 8  | S[167] | 4  | 552.1466        | <b>276.5770</b> | 184.7204        |
|         | 1314.2571       | 657.6322        | <b>438.7572</b> | 9  | A      | 3  | 385.1483        | 193.0778        | 129.0543        |
|         | 1481.2554       | 741.1314        | <b>494.4233</b> | 10 | S[167] | 2  | 314.1112        | 157.5592        | 105.3752        |
|         |                 |                 |                 | 11 | K      | 1  | 147.1128        | 74.0600         | 49.7091         |

# Annotated spectra from Saleem et. al. 2009

R.AS<sub>167</sub>KSNS<sub>167</sub>LITSTDPVEDHISK.Y/3

0.8955

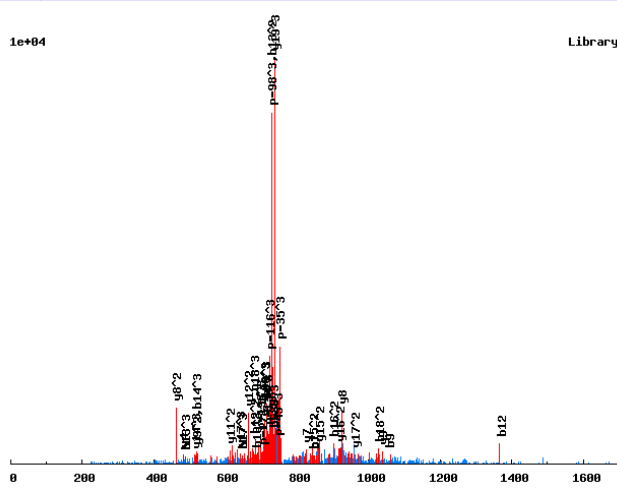

| Library | b <sup>1+</sup> | b <sup>2+</sup> | b <sup>3+</sup> | #  | AA     | #  | y <sup>1+</sup> | y <sup>2+</sup> | y <sup>3+</sup> |
|---------|-----------------|-----------------|-----------------|----|--------|----|-----------------|-----------------|-----------------|
|         | 72.0444         | 36.5258         | 24.6863         | 1  | A      | 20 |                 |                 |                 |
|         | 239.0428        | 120.0250        | 80.3524         | 2  | S[167] | 19 | 2217.9676       | 1109.4874       | 739.9941        |
|         | 367.1377        | 184.0725        | 123.0508        | 3  | K      | 18 | 2050.9692       | 1025.9883       | 684.3279        |
|         | 454.1697        | 227.5885        | 152.0614        | 4  | S      | 17 | 1922.8743       | 961.9408        | 641.6296        |
|         | 568.2127        | 284.6100        | 190.0757        | 5  | N      | 16 | 1835.8422       | 918.4248        | 612.6189        |
|         | 735.2110        | 368.1092        | 245.7419        | 6  | S[167] | 15 | 1721.7993       | 861.4033        | 574.6046        |
|         | 848.2951        | 424.6512        | 283.4366        | 7  | L      | 14 | 1554.8009       | 777.9041        | 518.9385        |
|         | 961.3792        | 481.1932        | 321.1312        | 8  | I      | 13 | 1441.7169       | 721.3621        | 481.2438        |
|         | 1062.4268       | 531.7171        | 354.8138        | 9  | T      | 12 | 1328.6328       | 664.8201        | 443.5491        |
|         | 1149.4589       | 575.2331        | 383.8245        | 10 | S      | 11 | 1227.5851       | 614.2962        | 409.8666        |
|         | 1250.5065       | 625.7569        | 417.5070        | 11 | T      | 10 | 1140.5531       | 570.7802        | 380.8559        |
|         | 1365.5335       | 683.2704        | 455.8493        | 12 | D      | 9  | 1039.5054       | 520.2564        | 347.1733        |
|         | 1462.5862       | 731.7968        | 488.2003        | 13 | P      | 8  | 924.4785        | 462.7429        | 308.8310        |
|         | 1561.6547       | 781.3310        | 521.2231        | 14 | V      | 7  | 827.4257        | 414.2165        | 276.4801        |
|         | 1690.6972       | 845.8523        | 564.2373        | 15 | E      | 6  | 728.3573        | 364.6823        | 243.4573        |
|         | 1805.7242       | 903.3657        | 602.5796        | 16 | D      | 5  | 599.3147        | 300.1610        | 200.4431        |
|         | 1942.7831       | 971.8952        | 648.2659        | 17 | H      | 4  | 484.2878        | 242.6475        | 162.1008        |
|         | 2055.8672       | 1028.4372       | 685.9606        | 18 | I      | 3  | 347.2289        | 174.1181        | 116.4145        |
|         | 2142.8992       | 1071.9532       | 714.9712        | 19 | S      | 2  | 234.1448        | 117.5761        | 78.7198         |
|         |                 |                 |                 | 20 | K      | 1  | 147.1128        | 74.0600         | 49.7091         |

# Annotated spectra from Saleem et. al. 2009

R.ASK<sub>136</sub>S<sub>167</sub>NSLITSDPVEDHISK<sub>136</sub>Y/3

0.8277

1e+04

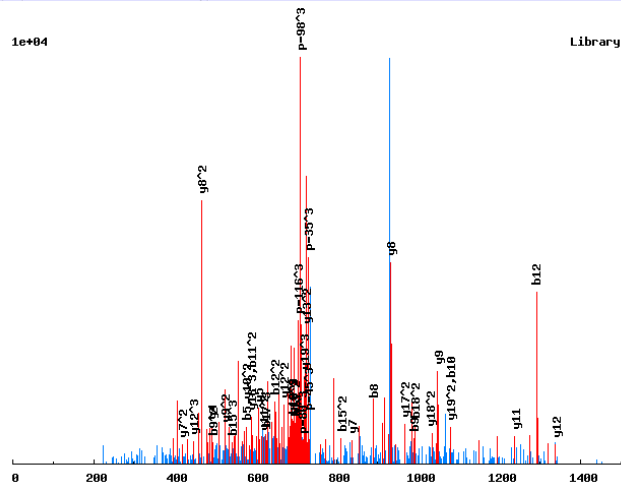

| Library | b <sup>1+</sup> | b <sup>2+</sup> | b <sup>3+</sup> | #  | AA     | #  | y <sup>1+</sup> | y <sup>2+</sup> | y <sup>3+</sup> |
|---------|-----------------|-----------------|-----------------|----|--------|----|-----------------|-----------------|-----------------|
|         | 72.0444         | 36.5258         | 24.6863         | 1  | A      | 20 |                 |                 |                 |
|         | 159.0764        | 80.0419         | 53.6970         | 2  | S      | 19 | 2154.0297       | 1077.5185       | 718.6814        |
|         | 295.1856        | 148.0964        | 99.0667         | 3  | K[136] | 18 | 2066.9976       | 1034.0025       | 689.6707        |
|         | 462.1839        | 231.5956        | 154.7328        | 4  | S[167] | 17 | 1930.8885       | 965.9479        | 644.3010        |
|         | 576.2269        | 288.6171        | 192.7471        | 5  | N      | 16 | 1763.8901       | 882.4487        | 588.6349        |
|         | 663.2589        | 332.1331        | 221.7578        | 6  | S      | 15 | 1649.8472       | 825.4272        | 550.6206        |
|         | 776.3430        | 388.6751        | 259.4525        | 7  | L      | 14 | 1562.8151       | 781.9112        | 521.6099        |
|         | 889.4270        | 445.2172        | 297.1472        | 8  | I      | 13 | 1449.7311       | 725.3692        | 483.9152        |
|         | 990.4747        | 495.7410        | 330.8298        | 9  | T      | 12 | 1336.6470       | 668.8272        | 446.2205        |
|         | 1077.5067       | 539.2570        | 359.8404        | 10 | S      | 11 | 1235.5993       | 618.3033        | 412.5380        |
|         | 1178.5544       | 589.7808        | 393.5230        | 11 | T      | 10 | 1148.5673       | 574.7873        | 383.5273        |
|         | 1293.5813       | 647.2943        | 431.8653        | 12 | D      | 9  | 1047.5196       | 524.2635        | 349.8447        |
|         | 1390.6341       | 695.8207        | 464.2162        | 13 | P      | 8  | 932.4927        | 466.7500        | 311.5024        |
|         | 1489.7025       | 745.3549        | 497.2390        | 14 | V      | 7  | 835.4399        | 418.2236        | 279.1515        |
|         | 1618.7451       | 809.8762        | 540.2532        | 15 | E      | 6  | 736.3715        | 368.6894        | 246.1287        |
|         | 1733.7721       | 867.3897        | 578.5955        | 16 | D      | 5  | 607.3289        | 304.1681        | 203.1145        |
|         | 1870.8310       | 935.9191        | 624.2818        | 17 | H      | 4  | 492.3020        | 246.6546        | 164.7722        |
|         | 1983.9150       | 992.4611        | 661.9765        | 18 | I      | 3  | 355.2431        | 178.1252        | 119.0859        |
|         | 2070.9470       | 1035.9772       | 690.9872        | 19 | S      | 2  | 242.1590        | 121.5832        | 81.3912         |
|         |                 |                 |                 | 20 | K[136] | 1  | 155.1270        | 78.0671         | 52.3805         |

# Annotated spectra from Saleem et. al. 2009

K.ASNIS<sub>167</sub>LGS<sub>167</sub>VEQQQQSITKPKQNK.S/3

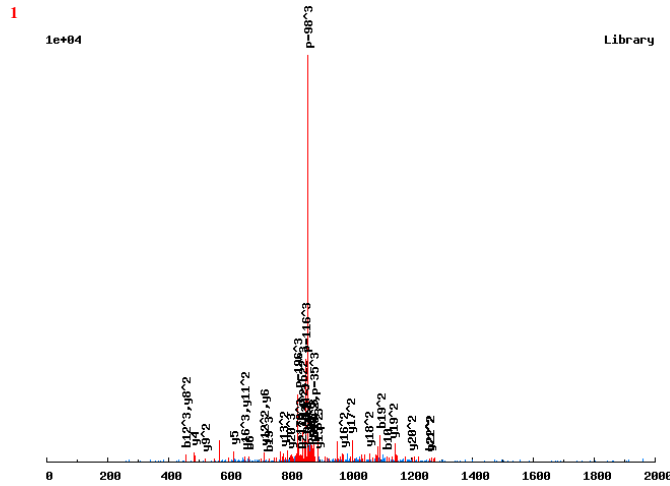

| Library | b <sup>1+</sup> | b <sup>2+</sup> | b <sup>3+</sup> | #  | AA     | #  | y <sup>1+</sup> | y <sup>2+</sup> | y <sup>3+</sup> |
|---------|-----------------|-----------------|-----------------|----|--------|----|-----------------|-----------------|-----------------|
|         | 72.0444         | 36.5258         | 24.6863         | 1  | A      | 23 |                 |                 |                 |
|         | 159.0764        | 80.0419         | 53.6970         | 2  | S      | 22 | 2602.1910       | 1301.5991       | 868.0685        |
|         | 273.1193        | 137.0633        | 91.7113         | 3  | N      | 21 | 2515.1589       | 1258.0831       | 839.0578        |
|         | 386.2034        | 193.6053        | 129.4060        | 4  | I      | 20 | 2401.1160       | 1201.0616       | 801.0435        |
|         | 553.2018        | 277.1045        | 185.0721        | 5  | S[167] | 19 | 2288.0319       | 1144.5196       | 763.3488        |
|         | 666.2858        | 333.6466        | 222.7668        | 6  | L      | 18 | 2121.0336       | 1061.0204       | 707.6827        |
|         | 723.3073        | 362.1573        | 241.7740        | 7  | G      | 17 | 2007.9495       | 1004.4784       | 669.9880        |
|         | 890.3057        | 445.6565        | 297.4401        | 8  | S[167] | 16 | 1950.9281       | 975.9677        | 650.9809        |
|         | 989.3741        | 495.1907        | 330.4629        | 9  | V      | 15 | 1783.9297       | 892.4685        | 595.3148        |
|         | 1118.4167       | 559.7120        | 373.4771        | 10 | E      | 14 | 1684.8613       | 842.9343        | 562.2919        |
|         | 1246.4752       | 623.7413        | 416.1633        | 11 | Q      | 13 | 1555.8187       | 778.4130        | 519.2778        |
|         | 1374.5338       | 687.7705        | 458.8495        | 12 | Q      | 12 | 1427.7601       | 714.3837        | 476.5916        |
|         | 1502.5924       | 751.7998        | 501.5357        | 13 | Q      | 11 | 1299.7015       | 650.3544        | 433.9054        |
|         | 1630.6510       | 815.8291        | 544.2218        | 14 | Q      | 10 | 1171.6430       | 586.3251        | 391.2192        |
|         | 1758.7096       | 879.8584        | 586.9080        | 15 | Q      | 9  | 1043.5844       | 522.2958        | 348.5330        |
|         | 1845.7416       | 923.3744        | 615.9187        | 16 | S      | 8  | 915.5258        | 458.2665        | 305.8468        |
|         | 1958.8256       | 979.9165        | 653.6134        | 17 | I      | 7  | 828.4938        | 414.7505        | 276.8361        |
|         | 2059.8733       | 1030.4403       | 687.2960        | 18 | T      | 6  | 715.4097        | 358.2085        | 239.1414        |
|         | 2187.9683       | 1094.4878       | 729.9943        | 19 | K      | 5  | 614.3620        | 307.6847        | 205.4589        |
|         | 2285.0210       | 1143.0142       | 762.3452        | 20 | P      | 4  | 486.2671        | 243.6372        | 162.7605        |
|         | 2413.0796       | 1207.0435       | 805.0314        | 21 | Q      | 3  | 389.2143        | 195.1108        | 130.4096        |
|         | 2527.1226       | 1264.0649       | 843.0457        | 22 | N      | 2  | 261.1557        | 131.0815        | 87.7234         |
|         |                 |                 |                 | 23 | K      | 1  | 147.1128        | 74.0600         | 49.7091         |

# Annotated spectra from Saleem et. al. 2009

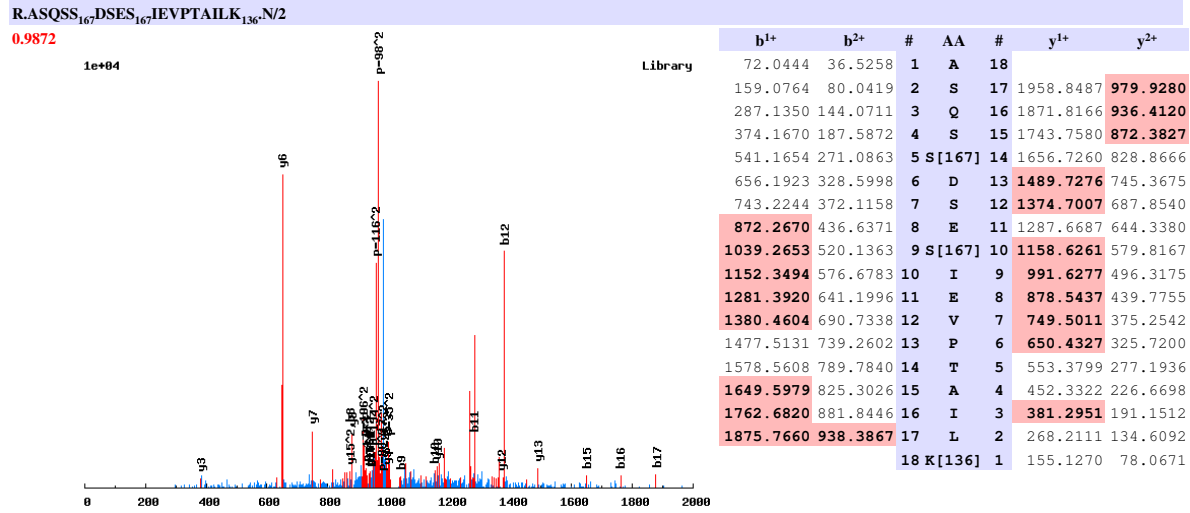

# Annotated spectra from Saleem et. al. 2009

R.AS<sub>167</sub>SDASDLLR<sub>166</sub>Q/2

0.9371

1e+04

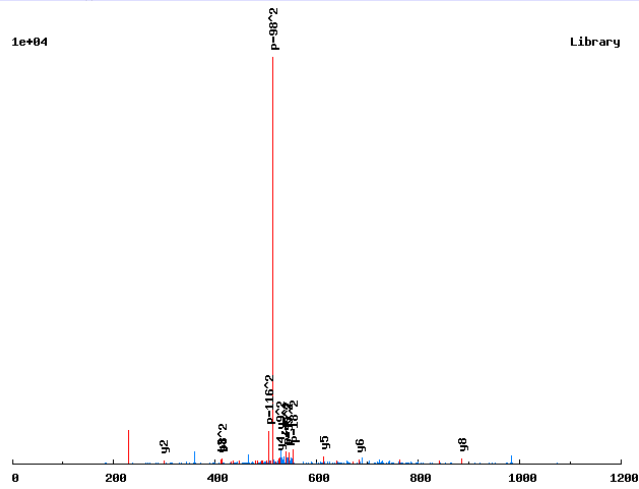

| Library | b <sup>1+</sup> | b <sup>2+</sup> | #  | AA     | #  | y <sup>1+</sup> | y <sup>2+</sup> |
|---------|-----------------|-----------------|----|--------|----|-----------------|-----------------|
|         | 72.0444         | 36.5258         | 1  | A      | 10 |                 |                 |
|         | 239.0428        | 120.0250        | 2  | S[167] | 9  | 1053.4487       | 527.2280        |
|         | 326.0748        | 163.5410        | 3  | S      | 8  | 886.4504        | 443.7288        |
|         | 441.1017        | 221.0545        | 4  | D      | 7  | 799.4184        | 400.2128        |
|         | 512.1388        | 256.5731        | 5  | A      | 6  | 684.3914        | 342.6993        |
|         | 599.1709        | 300.0891        | 6  | S      | 5  | 613.3543        | 307.1808        |
|         | 714.1978        | 357.6025        | 7  | D      | 4  | 526.3223        | 263.6648        |
|         | 827.2819        | 414.1446        | 8  | L      | 3  | 411.2953        | 206.1513        |
|         | 940.3659        | 470.6866        | 9  | L      | 2  | 298.2113        | 149.6093        |
|         |                 |                 | 10 | R[166] | 1  | 185.1272        | 93.0672         |

Annotated spectra from Saleem et. al. 2009

R.ASS<sub>167</sub>DAS<sub>167</sub>DLLR<sub>166</sub>Q/2

0.9991

1e+04

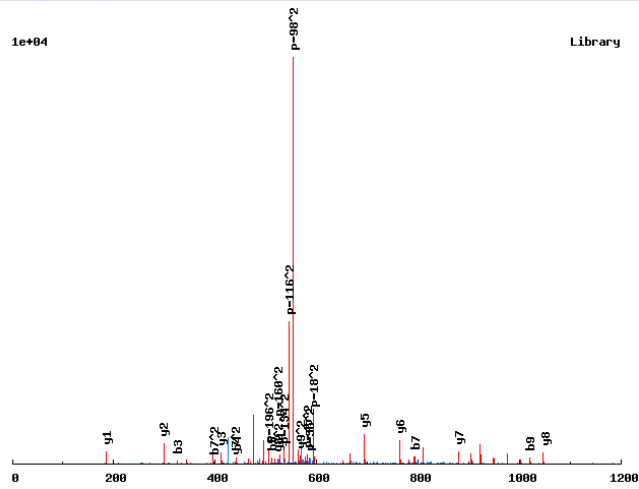

| Library | b <sup>1+</sup> | b <sup>2+</sup> | #  | AA     | #  | y <sup>1+</sup> | y <sup>2+</sup> |
|---------|-----------------|-----------------|----|--------|----|-----------------|-----------------|
|         | 72.0444         | 36.5258         | 1  | A      | 10 |                 |                 |
|         | 159.0764        | 80.0419         | 2  | S      | 9  | 1133.4151       | 567.2112        |
|         | 326.0748        | 163.5410        | 3  | S[167] | 8  | 1046.3831       | 523.6952        |
|         | 441.1017        | 221.0545        | 4  | D      | 7  | 879.3847        | 440.1960        |
|         | 512.1388        | 256.5731        | 5  | A      | 6  | 764.3578        | 382.6825        |
|         | 679.1372        | 340.0722        | 6  | S[167] | 5  | 693.3206        | 347.1640        |
|         | 794.1641        | 397.5857        | 7  | D      | 4  | 526.3223        | 263.6648        |
|         | 907.2482        | 454.1277        | 8  | L      | 3  | 411.2953        | 206.1513        |
|         | 1020.3323       | 510.6698        | 9  | L      | 2  | 298.2113        | 149.6093        |
|         |                 |                 | 10 | R[166] | 1  | 185.1272        | 93.0672         |



# Annotated spectra from Saleem et. al. 2009

K.AS<sub>167</sub>SPSRPLFGVGT<sub>181</sub>SPNR.K/3

0.8708

1e+04

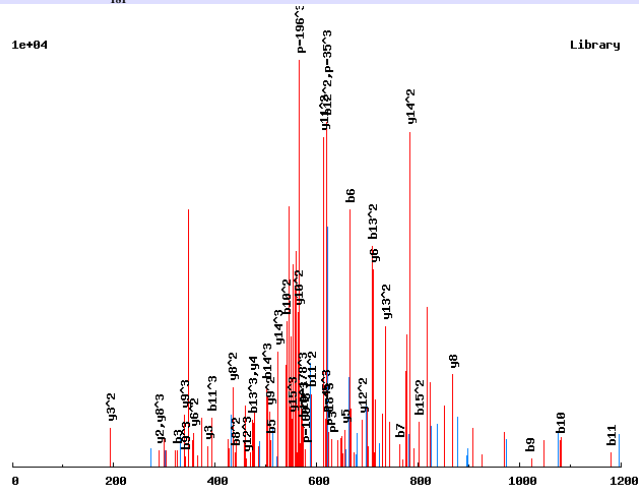

| Library | b <sup>1+</sup>  | b <sup>2+</sup> | b <sup>3+</sup> | #  | AA      | #  | y <sup>1+</sup> | y <sup>2+</sup> | y <sup>3+</sup> |
|---------|------------------|-----------------|-----------------|----|---------|----|-----------------|-----------------|-----------------|
|         | 72.0444          | 36.5258         | 24.6863         | 1  | A       | 17 |                 |                 |                 |
|         | 239.0428         | 120.0250        | 80.3524         | 2  | S [167] | 16 | 1818.7935       | 909.9004        | 606.9360        |
|         | <b>326.0748</b>  | 163.5410        | 109.3631        | 3  | S       | 15 | 1651.7952       | 826.4012        | <b>551.2699</b> |
|         | 423.1275         | 212.0674        | 141.7140        | 4  | P       | 14 | 1564.7631       | <b>782.8852</b> | <b>522.2592</b> |
|         | <b>510.1596</b>  | 255.5834        | 170.7247        | 5  | S       | 13 | 1467.7104       | <b>734.3588</b> | 489.9083        |
|         | <b>666.2607</b>  | 333.6340        | 222.7584        | 6  | R       | 12 | 1380.6784       | <b>690.8428</b> | <b>460.8976</b> |
|         | <b>763.3134</b>  | 382.1604        | 255.1093        | 7  | P       | 11 | 1224.5772       | <b>612.7923</b> | 408.8639        |
|         | 876.3975         | <b>438.7024</b> | 292.8040        | 8  | L       | 10 | 1127.5245       | <b>564.2659</b> | 376.5130        |
|         | <b>1023.4659</b> | 512.2366        | <b>341.8268</b> | 9  | F       | 9  | 1014.4404       | <b>507.7239</b> | <b>338.8183</b> |
|         | <b>1080.4874</b> | <b>540.7473</b> | 360.8340        | 10 | G       | 8  | <b>867.3720</b> | <b>434.1896</b> | <b>289.7955</b> |
|         | <b>1179.5558</b> | <b>590.2815</b> | <b>393.8568</b> | 11 | V       | 7  | 810.3506        | 405.6789        | 270.7884        |
|         | 1236.5772        | <b>618.7923</b> | 412.8639        | 12 | G       | 6  | <b>711.2821</b> | <b>356.1447</b> | 237.7656        |
|         | 1417.5913        | <b>709.2993</b> | <b>473.2019</b> | 13 | T [181] | 5  | <b>654.2607</b> | 327.6340        | 218.7584        |
|         | 1504.6233        | 752.8153        | <b>502.2126</b> | 14 | S       | 4  | <b>473.2467</b> | 237.1270        | 158.4204        |
|         | 1601.6760        | <b>801.3417</b> | 534.5635        | 15 | P       | 3  | <b>386.2146</b> | <b>193.6110</b> | 129.4097        |
|         | 1715.7190        | 858.3631        | <b>572.5778</b> | 16 | N       | 2  | <b>289.1619</b> | 145.0846        | 97.0588         |
|         |                  |                 |                 | 17 | R       | 1  | 175.1190        | 88.0631         | 59.0445         |

# Annotated spectra from Saleem et. al. 2009

R.ASST<sub>181</sub>TNTATLDDLVSDFMENLTANATT<sub>181</sub>SHTPTSK.T/4

0.8771

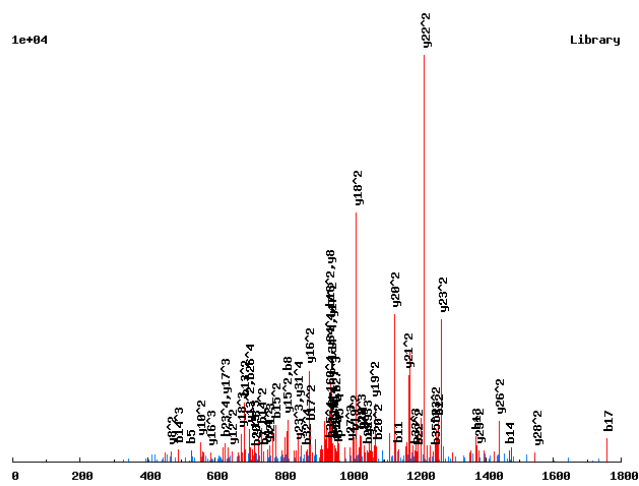

| Library | b <sup>1+</sup> | b <sup>2+</sup> | b <sup>3+</sup> | b <sup>4+</sup> | #  | AA     | #  | y <sup>1+</sup> | y <sup>2+</sup> | y <sup>3+</sup> | y <sup>4+</sup> |
|---------|-----------------|-----------------|-----------------|-----------------|----|--------|----|-----------------|-----------------|-----------------|-----------------|
|         | 72.0444         | 36.5258         | 24.6863         | 18.7666         | 1  | A      | 36 |                 |                 |                 |                 |
|         | 159.0764        | 80.0419         | 53.6970         | 40.5246         | 2  | S      | 35 | 3831.6555       | 1916.3314       | 1277.8900       | 958.6693        |
|         | 246.1085        | 123.5579        | 82.7077         | 62.2826         | 3  | S      | 34 | 3744.6235       | 1872.8154       | 1248.8793       | 936.9113        |
|         | 427.1225        | 214.0649        | 143.0457        | 107.5361        | 4  | T[181] | 33 | 3657.5915       | 1829.2994       | 1219.8687       | 915.1533        |
|         | 528.1701        | 264.5887        | 176.7282        | 132.7980        | 5  | T      | 32 | 3476.5774       | 1738.7924       | 1159.5307       | 869.8998        |
|         | 642.2131        | 321.6102        | 214.7425        | 161.3087        | 6  | N      | 31 | 3375.5298       | 1688.2685       | 1125.8481       | 844.6379        |
|         | 743.2608        | 372.1340        | 248.4251        | 186.5706        | 7  | T      | 30 | 3261.4868       | 1631.2471       | 1087.8338       | 816.1272        |
|         | 814.2979        | 407.6526        | 272.1041        | 204.3299        | 8  | A      | 29 | 3160.4392       | 1580.7232       | 1054.1512       | 790.8652        |
|         | 915.3455        | 458.1764        | 305.7867        | 229.5918        | 9  | T      | 28 | 3089.4020       | 1545.2047       | 1030.4722       | 773.1060        |
|         | 1028.4296       | 514.7184        | 343.4814        | 257.8629        | 10 | L      | 27 | 2988.3544       | 1494.6808       | 996.7896        | 747.8441        |
|         | 1143.4565       | 572.2319        | 381.8237        | 286.6196        | 11 | D      | 26 | 2875.2703       | 1438.1388       | 959.0950        | 719.5730        |
|         | 1258.4835       | 629.7454        | 420.1660        | 315.3763        | 12 | D      | 25 | 2760.2434       | 1380.6253       | 920.7526        | 690.8163        |
|         | 1371.5675       | 686.2874        | 457.8607        | 343.6473        | 13 | L      | 24 | 2645.2164       | 1323.1119       | 882.4103        | 662.0596        |
|         | 1470.6360       | 735.8216        | 490.8835        | 368.4144        | 14 | V      | 23 | 2532.1324       | 1266.5698       | 844.7156        | 633.7886        |
|         | 1557.6680       | 779.3376        | 519.8942        | 390.1725        | 15 | S      | 22 | 2433.0640       | 1217.0356       | 811.6928        | 609.0214        |
|         | 1644.7000       | 822.8536        | 548.9049        | 411.9305        | 16 | S      | 21 | 2346.0319       | 1173.5196       | 782.6822        | 587.2634        |
|         | 1759.7270       | 880.3671        | 587.2472        | 440.6872        | 17 | D      | 20 | 2258.9999       | 1130.0036       | 753.6715        | 565.5054        |
|         | 1872.8110       | 936.9091        | 624.9419        | 468.9582        | 18 | I      | 19 | 2143.9730       | 1072.4901       | 715.3292        | 536.7487        |
|         | 2019.8794       | 1010.4434       | 673.9647        | 505.7253        | 19 | F      | 18 | 2030.8889       | 1015.9481       | 677.6345        | 508.4777        |
|         | 2150.9199       | 1075.9636       | 717.6448        | 538.4854        | 20 | M      | 17 | 1883.8205       | 942.4139        | 628.6117        | 471.7106        |
|         | 2279.9625       | 1140.4849       | 760.6590        | 570.7461        | 21 | E      | 16 | 1752.7800       | 876.8936        | 584.9315        | 438.9505        |
|         | 2394.0054       | 1197.5064       | 798.6733        | 599.2568        | 22 | N      | 15 | 1623.7374       | 812.3723        | 541.9173        | 406.6898        |
|         | 2507.0895       | 1254.0484       | 836.3680        | 627.5278        | 23 | L      | 14 | 1509.6945       | 755.3509        | 503.9030        | 378.1791        |
|         | 2608.1372       | 1304.5722       | 870.0506        | 652.7898        | 24 | T      | 13 | 1396.6104       | 698.8088        | 466.2083        | 349.9081        |
|         | 2679.1743       | 1340.0908       | 893.7296        | 670.5490        | 25 | A      | 12 | 1295.5627       | 648.2850        | 432.5258        | 324.6461        |
|         | 2793.2172       | 1397.1122       | 931.7439        | 699.0598        | 26 | N      | 11 | 1224.5256       | 612.7665        | 408.8467        | 306.8869        |
|         | 2864.2543       | 1432.6308       | 955.4230        | 716.8190        | 27 | A      | 10 | 1110.4827       | 555.7450        | 370.8324        | 278.3761        |
|         | 2965.3020       | 1483.1546       | 989.1055        | 742.0810        | 28 | T      | 9  | 1039.4456       | 520.2264        | 347.1534        | 260.6169        |
|         | 3146.3160       | 1573.6616       | 1049.4435       | 787.3345        | 29 | T[181] | 8  | 938.3979        | 469.7026        | 313.4708        | 235.3549        |
|         | 3233.3480       | 1617.1777       | 1078.4542       | 809.0925        | 30 | S      | 7  | 757.3839        | 379.1956        | 253.1328        | 190.1014        |
|         | 3370.4070       | 1685.7071       | 1124.1405       | 843.3572        | 31 | H      | 6  | 670.3519        | 335.6796        | 224.1221        | 168.3434        |
|         | 3471.4546       | 1736.2310       | 1157.8231       | 868.6191        | 32 | T      | 5  | 533.2930        | 267.1501        | 178.4358        | 134.0787        |
|         | 3568.5074       | 1784.7573       | 1190.1740       | 892.8823        | 33 | P      | 4  | 432.2453        | 216.6263        | 144.7533        | 108.8168        |
|         | 3669.5551       | 1835.2812       | 1223.8565       | 918.1442        | 34 | T      | 3  | 335.1925        | 168.0999        | 112.4024        | 84.5536         |
|         | 3756.5871       | 1878.7972       | 1252.8672       | 939.9022        | 35 | S      | 2  | 234.1448        | 117.5761        | 78.7198         | 59.2917         |
|         |                 |                 |                 |                 | 36 | K      | 1  | 147.1128        | 74.0600         | 49.7091         | 37.5337         |

# Annotated spectra from Saleem et. al. 2009

R.ASS<sub>167</sub>VAS<sub>167</sub>IHNQR<sub>166</sub>V/2

0.949

1e+04

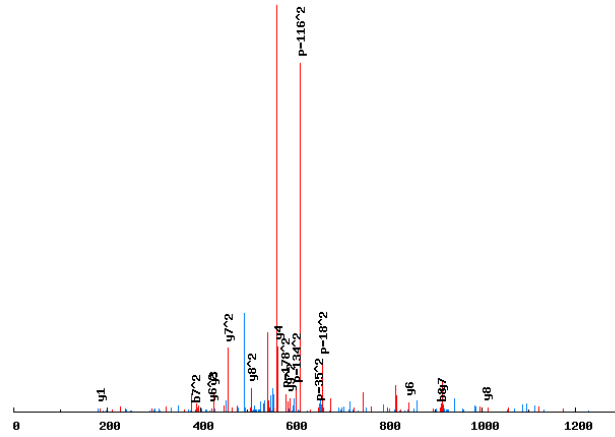

| Library | b <sup>1+</sup> | b <sup>2+</sup> | #  | AA     | #  | y <sup>1+</sup> | y <sup>2+</sup> |
|---------|-----------------|-----------------|----|--------|----|-----------------|-----------------|
|         | 72.0444         | 36.5258         | 1  | A      | 11 |                 |                 |
|         | 159.0764        | 80.0419         | 2  | S      | 10 | 1268.5060       | 634.7566        |
|         | 326.0748        | 163.5410        | 3  | S[167] | 9  | 1181.4739       | 591.2406        |
|         | 425.1432        | 213.0752        | 4  | V      | 8  | 1014.4756       | 507.7414        |
|         | 496.1803        | 248.5938        | 5  | A      | 7  | 915.4072        | 458.2072        |
|         | 663.1787        | 332.0930        | 6  | S[167] | 6  | 844.3701        | 422.6887        |
|         | 776.2627        | 388.6350        | 7  | I      | 5  | 677.3717        | 339.1895        |
|         | 913.3216        | 457.1645        | 8  | H      | 4  | 564.2876        | 282.6475        |
|         | 1027.3646       | 514.1859        | 9  | N      | 3  | 427.2287        | 214.1180        |
|         | 1155.4231       | 578.2152        | 10 | Q      | 2  | 313.1858        | 157.0965        |
|         |                 |                 | 11 | R[166] | 1  | 185.1272        | 93.0672         |

# Annotated spectra from Saleem et. al. 2009

R.AS<sub>167</sub>TAVES<sub>167</sub>LDNHPPK.A/2

0.9968

1e+04

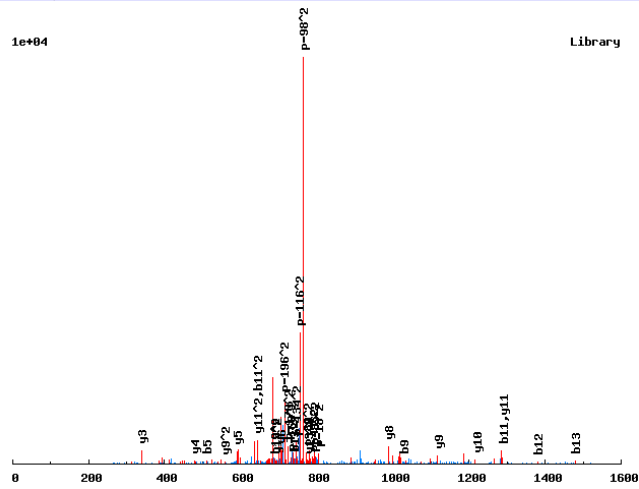

| Library | b <sup>1+</sup> | b <sup>2+</sup> | #  | AA     | #  | y <sup>1+</sup> | y <sup>2+</sup> |
|---------|-----------------|-----------------|----|--------|----|-----------------|-----------------|
|         | 72.0444         | 36.5258         | 1  | A      | 14 |                 |                 |
|         | 239.0428        | 120.0250        | 2  | S[167] | 13 | 1554.6237       | 777.8155        |
|         | 340.0904        | 170.5489        | 3  | T      | 12 | 1387.6253       | 694.3163        |
|         | 411.1275        | 206.0674        | 4  | A      | 11 | 1286.5776       | 643.7925        |
|         | 510.1960        | 255.6016        | 5  | V      | 10 | 1215.5405       | 608.2739        |
|         | 639.2385        | 320.1229        | 6  | E      | 9  | 1116.4721       | 558.7397        |
|         | 806.2369        | 403.6221        | 7  | S[167] | 8  | 987.4295        | 494.2184        |
|         | 919.3210        | 460.1641        | 8  | L      | 7  | 820.4312        | 410.7192        |
|         | 1034.3479       | 517.6776        | 9  | D      | 6  | 707.3471        | 354.1772        |
|         | 1148.3908       | 574.6991        | 10 | N      | 5  | 592.3202        | 296.6637        |
|         | 1285.4497       | 643.2285        | 11 | H      | 4  | 478.2772        | 239.6423        |
|         | 1382.5025       | 691.7549        | 12 | P      | 3  | 341.2183        | 171.1128        |
|         | 1479.5553       | 740.2813        | 13 | P      | 2  | 244.1656        | 122.5864        |
|         |                 |                 | 14 | K      | 1  | 147.1128        | 74.0600         |

# Annotated spectra from Saleem et. al. 2009

R.AS<sub>167</sub>VSAM<sub>147</sub>S<sub>167</sub>PPLC<sub>160</sub>R.S/2

0.7288

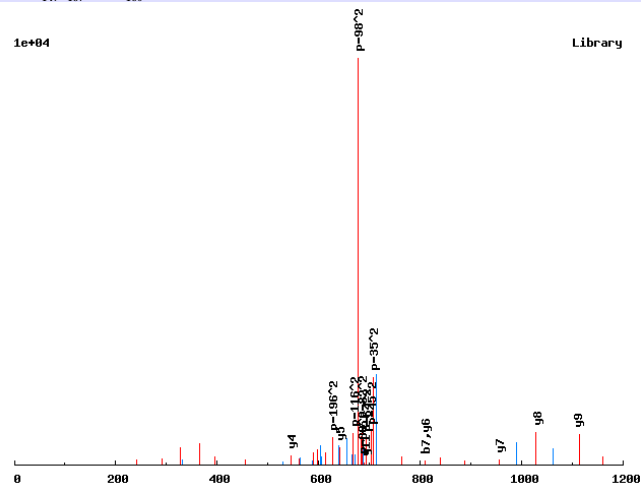

| Library | b <sup>1+</sup> | b <sup>2+</sup> | #  | AA     | #  | y <sup>1+</sup> | y <sup>2+</sup> |
|---------|-----------------|-----------------|----|--------|----|-----------------|-----------------|
|         | 72.0444         | 36.5258         | 1  | A      | 12 |                 |                 |
|         | 239.0428        | 120.0250        | 2  | S[167] | 11 | 1380.5089       | 690.7581        |
|         | 338.1112        | 169.5592        | 3  | V      | 10 | 1213.5105       | 607.2589        |
|         | 425.1432        | 213.0752        | 4  | S      | 9  | 1114.4421       | 557.7247        |
|         | 496.1803        | 248.5938        | 5  | A      | 8  | 1027.4101       | 514.2087        |
|         | 643.2157        | 322.1115        | 6  | M[147] | 7  | 956.3729        | 478.6901        |
|         | 810.2141        | 405.6107        | 7  | S[167] | 6  | 809.3375        | 405.1724        |
|         | 907.2668        | 454.1371        | 8  | P      | 5  | 642.3392        | 321.6732        |
|         | 1004.3196       | 502.6634        | 9  | P      | 4  | 545.2864        | 273.1469        |
|         | 1117.4036       | 559.2055        | 10 | L      | 3  | 448.2337        | 224.6205        |
|         | 1277.4343       | 639.2208        | 11 | C[160] | 2  | 335.1496        | 168.0784        |
|         |                 |                 | 12 | R      | 1  | 175.1190        | 88.0631         |

Annotated spectra from Saleem et. al. 2009

K.ASYGSGGNSQNQEYS<sub>167</sub>S<sub>167</sub>DDNIDVNK<sub>136</sub>N/3

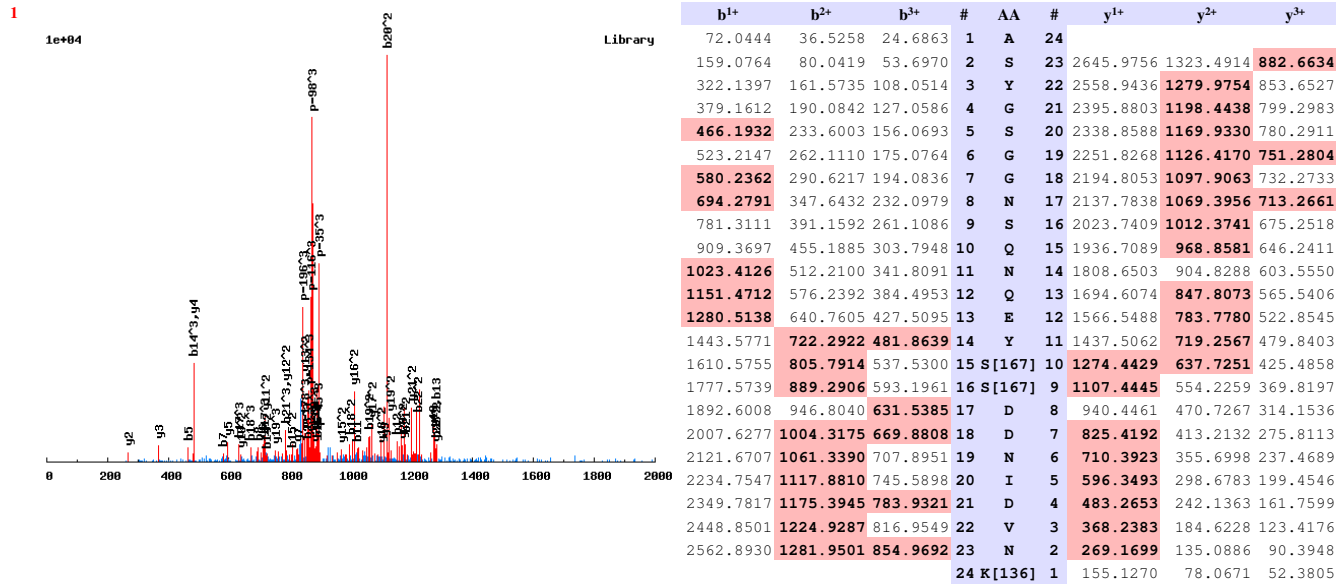

# Annotated spectra from Saleem et. al. 2009

R.ATAK<sub>136</sub>T<sub>181</sub>S<sub>167</sub>VESEIGGNQVGLK<sub>136</sub>I/3

0.9684

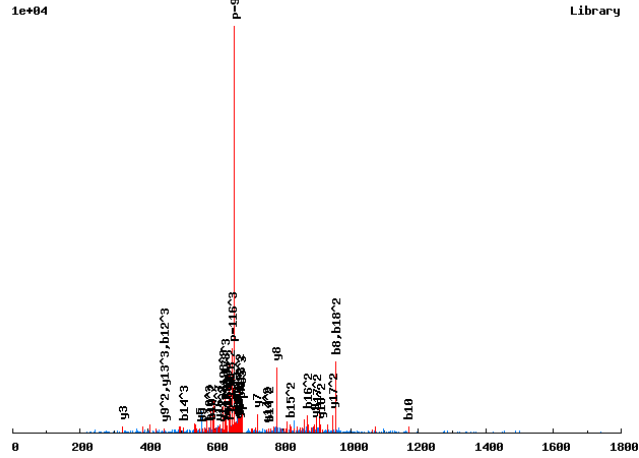

| Library | b <sup>1+</sup> | b <sup>2+</sup> | b <sup>3+</sup> | #  | AA     | #  | y <sup>1+</sup> | y <sup>2+</sup> | y <sup>3+</sup> |
|---------|-----------------|-----------------|-----------------|----|--------|----|-----------------|-----------------|-----------------|
|         | 72.0444         | 36.5258         | 24.6863         | 1  | A      | 19 |                 |                 |                 |
|         | 173.0921        | 87.0497         | 58.3689         | 2  | T      | 18 | 1993.9214       | 997.4643        | 665.3120        |
|         | 244.1292        | 122.5682        | 82.0479         | 3  | A      | 17 | 1892.8737       | 946.9405        | 631.6294        |
|         | 380.2383        | 190.6228        | 127.4176        | 4  | K[136] | 16 | 1821.8366       | 911.4219        | 607.9504        |
|         | 561.2524        | 281.1298        | 187.7556        | 5  | T[181] | 15 | 1685.7274       | 843.3673        | 562.5807        |
|         | 728.2507        | 364.6290        | 243.4218        | 6  | S[167] | 14 | 1504.7134       | 752.8603        | 502.2427        |
|         | 827.3191        | 414.1632        | 276.4446        | 7  | V      | 13 | 1337.7150       | 669.3612        | 446.5765        |
|         | 956.3617        | 478.6845        | 319.4588        | 8  | E      | 12 | 1238.6466       | 619.8270        | 413.5537        |
|         | 1043.3937       | 522.2005        | 348.4694        | 9  | S      | 11 | 1109.6040       | 555.3057        | 370.5395        |
|         | 1172.4363       | 586.7218        | 391.4836        | 10 | E      | 10 | 1022.5720       | 511.7896        | 341.5289        |
|         | 1285.5204       | 643.2638        | 429.1783        | 11 | I      | 9  | 893.5294        | 447.2683        | 298.5147        |
|         | 1342.5419       | 671.7746        | 448.1855        | 12 | G      | 8  | 780.4454        | 390.7263        | 260.8200        |
|         | 1399.5633       | 700.2853        | 467.1926        | 13 | G      | 7  | 723.4239        | 362.2156        | 241.8128        |
|         | 1513.6062       | 757.3068        | 505.2069        | 14 | N      | 6  | 666.4024        | 333.7049        | 222.8057        |
|         | 1641.6648       | 821.3361        | 547.8931        | 15 | Q      | 5  | 552.3595        | 276.6834        | 184.7914        |
|         | 1740.7332       | 870.8703        | 580.9159        | 16 | V      | 4  | 424.3009        | 212.6541        | 142.1052        |
|         | 1797.7547       | 899.3810        | 599.9231        | 17 | G      | 3  | 325.2325        | 163.1199        | 109.0824        |
|         | 1910.8388       | 955.9230        | 637.6178        | 18 | L      | 2  | 268.2111        | 134.6092        | 90.0752         |
|         |                 |                 |                 | 19 | K[136] | 1  | 155.1270        | 78.0671         | 52.3805         |

# Annotated spectra from Saleem et. al. 2009

R.AT<sub>181</sub>S<sub>167</sub>S<sub>167</sub>S<sub>167</sub>S<sub>167</sub>GGSDGS<sub>167</sub>R.R/3

0.7114

1e+04

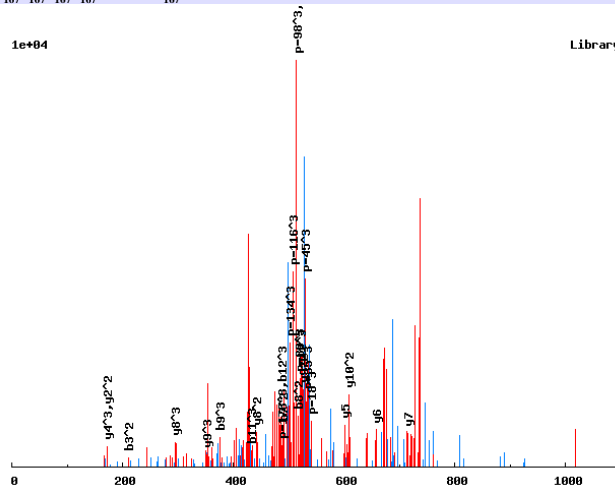

| Library | b <sup>1+</sup> | b <sup>2+</sup> | b <sup>3+</sup> | #  | AA     | #  | y <sup>1+</sup> | y <sup>2+</sup> | y <sup>3+</sup> |
|---------|-----------------|-----------------|-----------------|----|--------|----|-----------------|-----------------|-----------------|
|         | 72.0444         | 36.5258         | 24.6863         | 1  | A      | 13 |                 |                 |                 |
|         | 253.0584        | 127.0328        | 85.0243         | 2  | T[181] | 12 | 1564.2481       | 782.6277        | 522.0876        |
|         | 420.0568        | 210.5320        | 140.6904        | 3  | S[167] | 11 | 1383.2341       | 692.1207        | 461.7496        |
|         | 587.0551        | 294.0312        | 196.3566        | 4  | S[167] | 10 | 1216.2357       | 608.6215        | 406.0834        |
|         | 754.0535        | 377.5304        | 252.0227        | 5  | S[167] | 9  | 1049.2374       | 525.1223        | 350.4173        |
|         | 921.0518        | 461.0296        | 307.6888        | 6  | S[167] | 8  | 882.2390        | 441.6232        | 294.7512        |
|         | 978.0733        | 489.5403        | 326.6960        | 7  | G      | 7  | 715.2407        | 358.1240        | 239.0851        |
|         | 1035.0948       | 518.0510        | 345.7031        | 8  | G      | 6  | 658.2192        | 329.6132        | 220.0779        |
|         | 1122.1268       | 561.5670        | 374.7138        | 9  | S      | 5  | 601.1977        | 301.1025        | 201.0708        |
|         | 1237.1537       | 619.0805        | 413.0561        | 10 | D      | 4  | 514.1657        | 257.5865        | 172.0601        |
|         | 1294.1752       | 647.5912        | 432.0633        | 11 | G      | 3  | 399.1388        | 200.0730        | 133.7178        |
|         | 1461.1736       | 731.0904        | 487.7294        | 12 | S[167] | 2  | 342.1173        | 171.5623        | 114.7106        |
|         |                 |                 |                 | 13 | R      | 1  | 175.1190        | 88.0631         | 59.0445         |



# Annotated spectra from Saleem et. al. 2009

K.ATS<sub>167</sub>VSTS<sub>167</sub>PK<sub>136</sub>LEEQMNVSNNPIVLSDK<sub>136</sub>EK<sub>136</sub>H/3

0.6876

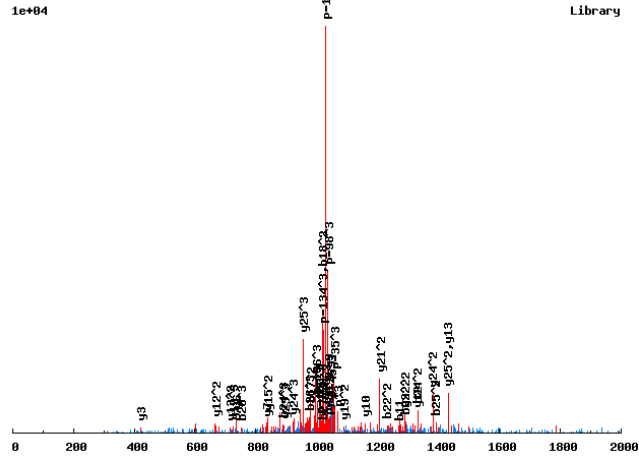

| Library | b <sup>1+</sup> | b <sup>2+</sup> | b <sup>3+</sup> | #  | AA     | #  | y <sup>1+</sup> | y <sup>2+</sup> | y <sup>3+</sup> |
|---------|-----------------|-----------------|-----------------|----|--------|----|-----------------|-----------------|-----------------|
|         | 72.0444         | 36.5258         | 24.6863         | 1  | A      | 28 |                 |                 |                 |
|         | 173.0921        | 87.0497         | 58.3689         | 2  | T      | 27 | 3131.4681       | 1566.2377       | 1044.4942       |
|         | 340.0904        | 170.5489        | 114.0350        | 3  | S[167] | 26 | 3030.4204       | 1515.7138       | 1010.8117       |
|         | 439.1588        | 220.0831        | 147.0578        | 4  | V      | 25 | 2863.4220       | 1432.2147       | 955.1455        |
|         | 526.1909        | 263.5991        | 176.0685        | 5  | S      | 24 | 2764.3536       | 1382.6805       | 922.1227        |
|         | 627.2386        | 314.1229        | 209.7510        | 6  | T      | 23 | 2677.3216       | 1339.1644       | 893.1121        |
|         | 794.2369        | 397.6221        | 265.4172        | 7  | S[167] | 22 | 2576.2739       | 1288.6406       | 859.4295        |
|         | 891.2897        | 446.1485        | 297.7681        | 8  | P      | 21 | 2409.2756       | 1205.1414       | 803.7634        |
|         | 1027.3988       | 514.2031        | 343.1378        | 9  | K[136] | 20 | 2312.2228       | 1156.6150       | 771.4125        |
|         | 1140.4829       | 570.7451        | 380.8325        | 10 | L      | 19 | 2176.1136       | 1088.5605       | 726.0427        |
|         | 1269.5255       | 635.2664        | 423.8467        | 11 | E      | 18 | 2063.0296       | 1032.0184       | 688.3480        |
|         | 1398.5681       | 699.7877        | 466.8609        | 12 | E      | 17 | 1933.9870       | 967.4971        | 645.3339        |
|         | 1526.6267       | 763.8170        | 509.5471        | 13 | Q      | 16 | 1804.9444       | 902.9758        | 602.3197        |
|         | 1657.6671       | 829.3372        | 553.2272        | 14 | M      | 15 | 1676.8858       | 838.9466        | 559.6335        |
|         | 1771.7101       | 886.3587        | 591.2415        | 15 | N      | 14 | 1545.8453       | 773.4263        | 515.9533        |
|         | 1870.7785       | 935.8929        | 624.2643        | 16 | V      | 13 | 1431.8024       | 716.4048        | 477.9390        |
|         | 1957.8105       | 979.4089        | 653.2750        | 17 | S      | 12 | 1332.7340       | 666.8706        | 444.9162        |
|         | 2044.8425       | 1022.9249       | 682.2857        | 18 | S      | 11 | 1245.7020       | 623.3546        | 415.9055        |
|         | 2158.8855       | 1079.9464       | 720.3000        | 19 | N      | 10 | 1158.6699       | 579.8386        | 386.8948        |
|         | 2255.9382       | 1128.4728       | 752.6509        | 20 | P      | 9  | 1044.6270       | 522.8171        | 348.8805        |
|         | 2369.0223       | 1185.0148       | 790.3456        | 21 | I      | 8  | 947.5742        | 474.2908        | 316.5296        |
|         | 2468.0907       | 1234.5490       | 823.3684        | 22 | V      | 7  | 834.4902        | 417.7487        | 278.8349        |
|         | 2581.1748       | 1291.0910       | 861.0631        | 23 | L      | 6  | 735.4218        | 368.2145        | 245.8121        |
|         | 2668.2068       | 1334.6070       | 890.0738        | 24 | S      | 5  | 622.3377        | 311.6725        | 208.1174        |
|         | 2783.2337       | 1392.1205       | 928.4161        | 25 | D      | 4  | 535.3057        | 268.1565        | 179.1067        |
|         | 2919.3429       | 1460.1751       | 973.7858        | 26 | K[136] | 3  | 420.2787        | 210.6430        | 140.7644        |
|         | 3048.3855       | 1524.6964       | 1016.8000       | 27 | E      | 2  | 284.1696        | 142.5884        | 95.3947         |
|         |                 |                 |                 | 28 | K[136] | 1  | 155.1270        | 78.0671         | 52.3805         |

# Annotated spectra from Saleem et. al. 2009

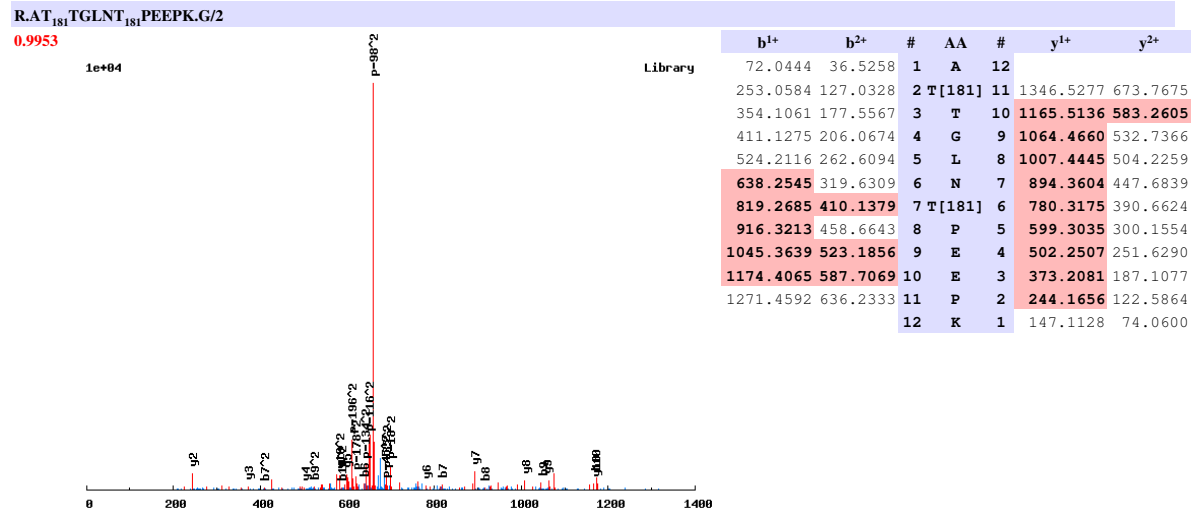

# Annotated spectra from Saleem et. al. 2009

K.AVDNDT<sub>181</sub>AGS<sub>167</sub>AGK<sub>136</sub>K<sub>136</sub>PLATESTK<sub>136</sub>R/2

0.9982

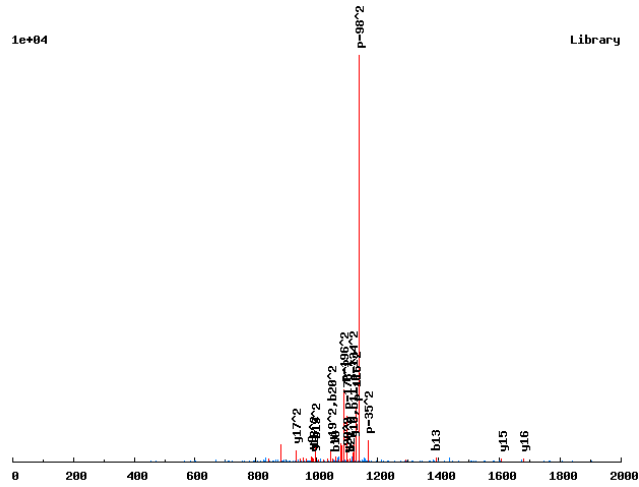

| Library | b <sup>1+</sup> | b <sup>2+</sup> | #  | AA     | #  | y <sup>1+</sup> | y <sup>2+</sup> |
|---------|-----------------|-----------------|----|--------|----|-----------------|-----------------|
|         | 72.0444         | 36.5258         | 1  | A      | 22 |                 |                 |
|         | 171.1128        | 86.0600         | 2  | V      | 21 | 2303.0265       | 1152.0169       |
|         | 286.1397        | 143.5735        | 3  | D      | 20 | 2203.9581       | 1102.4827       |
|         | 400.1827        | 200.5950        | 4  | N      | 19 | 2088.9312       | 1044.9692       |
|         | 515.2096        | 258.1084        | 5  | D      | 18 | 1974.8883       | 987.9478        |
|         | 696.2236        | 348.6155        | 6  | T[181] | 17 | 1859.8613       | 930.4343        |
|         | 767.2607        | 384.1340        | 7  | A      | 16 | 1678.8473       | 839.9273        |
|         | 824.2822        | 412.6447        | 8  | G      | 15 | 1607.8102       | 804.4087        |
|         | 991.2806        | 496.1439        | 9  | S[167] | 14 | 1550.7887       | 775.8980        |
|         | 1062.3177       | 531.6625        | 10 | A      | 13 | 1383.7904       | 692.3988        |
|         | 1119.3391       | 560.1732        | 11 | G      | 12 | 1312.7533       | 656.8803        |
|         | 1255.4483       | 628.2278        | 12 | K[136] | 11 | 1255.7318       | 628.3695        |
|         | 1391.5574       | 696.2824        | 13 | K[136] | 10 | 1119.6227       | 560.3150        |
|         | 1488.6102       | 744.8087        | 14 | P      | 9  | 983.5135        | 492.2604        |
|         | 1601.6943       | 801.3508        | 15 | L      | 8  | 886.4607        | 443.7340        |
|         | 1672.7314       | 836.8693        | 16 | A      | 7  | 773.3767        | 387.1920        |
|         | 1773.7790       | 887.3932        | 17 | T      | 6  | 702.3396        | 351.6734        |
|         | 1902.8216       | 951.9145        | 18 | E      | 5  | 601.2919        | 301.1496        |
|         | 1989.8537       | 995.4305        | 19 | S      | 4  | 472.2493        | 236.6283        |
|         | 2090.9013       | 1045.9543       | 20 | T      | 3  | 385.2173        | 193.1123        |
|         | 2219.9439       | 1110.4756       | 21 | E      | 2  | 284.1696        | 142.5884        |
|         |                 |                 | 22 | K[136] | 1  | 155.1270        | 78.0671         |

# Annotated spectra from Saleem et. al. 2009

K.AVDNDTAGS<sub>167</sub>AGK<sub>136</sub>K<sub>136</sub>PLATESTEK<sub>136</sub>R/3

0.9687

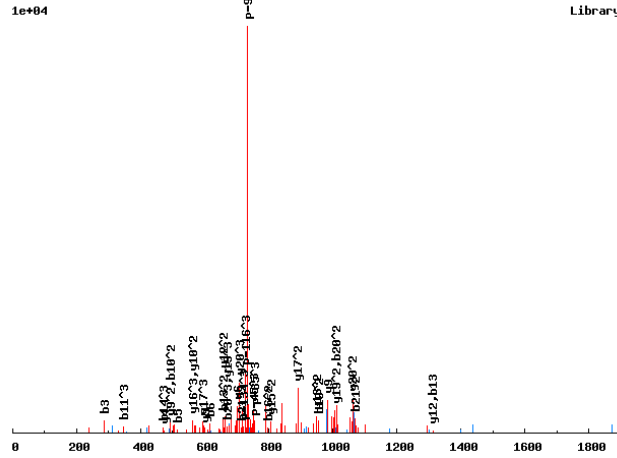

| Library | b <sup>1+</sup>  | b <sup>2+</sup>  | b <sup>3+</sup> | #  | AA     | #  | y <sup>1+</sup>  | y <sup>2+</sup>  | y <sup>3+</sup> |
|---------|------------------|------------------|-----------------|----|--------|----|------------------|------------------|-----------------|
|         | 72.0444          | 36.5258          | 24.6863         | 1  | A      | 22 |                  |                  |                 |
|         | 171.1128         | 86.0600          | 57.7091         | 2  | V      | 21 | 2223.0602        | 1112.0337        | 741.6916        |
|         | <b>286.1397</b>  | 143.5735         | 96.0514         | 3  | D      | 20 | 2123.9918        | <b>1062.4995</b> | <b>708.6688</b> |
|         | 400.1827         | 200.5950         | 134.0657        | 4  | N      | 19 | 2008.9649        | <b>1004.9861</b> | <b>670.3265</b> |
|         | <b>515.2096</b>  | 258.1084         | 172.4081        | 5  | D      | 18 | 1894.9219        | <b>947.9646</b>  | 632.3122        |
|         | <b>616.2573</b>  | 308.6323         | 206.0906        | 6  | T      | 17 | 1779.8950        | <b>890.4511</b>  | <b>593.9699</b> |
|         | 687.2944         | 344.1508         | 229.7697        | 7  | A      | 16 | 1678.8473        | 839.9273         | <b>560.2873</b> |
|         | 744.3159         | 372.6616         | 248.7768        | 8  | G      | 15 | 1607.8102        | <b>804.4087</b>  | 536.6083        |
|         | 911.3142         | 456.1608         | 304.4429        | 9  | S[167] | 14 | 1550.7887        | 775.8980         | 517.6011        |
|         | 982.3513         | <b>491.6793</b>  | 328.1220        | 10 | A      | 13 | 1383.7904        | 692.3988         | 461.9350        |
|         | 1039.3728        | 520.1900         | <b>347.1291</b> | 11 | G      | 12 | <b>1312.7533</b> | <b>656.8803</b>  | 438.2559        |
|         | 1175.4819        | 588.2446         | 392.4988        | 12 | K[136] | 11 | 1255.7318        | 628.3695         | 419.2488        |
|         | <b>1311.5911</b> | <b>656.2992</b>  | 437.8686        | 13 | K[136] | 10 | 1119.6227        | <b>560.3150</b>  | 373.8791        |
|         | 1408.6439        | 704.8256         | <b>470.2195</b> | 14 | P      | 9  | <b>983.5135</b>  | <b>492.2604</b>  | 328.5094        |
|         | 1521.7279        | 761.3676         | 507.9142        | 15 | L      | 8  | 886.4607         | 443.7340         | 296.1584        |
|         | 1592.7650        | <b>796.8862</b>  | 531.5932        | 16 | A      | 7  | 773.3767         | 387.1920         | 258.4637        |
|         | 1693.8127        | 847.4100         | 565.2758        | 17 | T      | 6  | <b>702.3396</b>  | 351.6734         | 234.7847        |
|         | 1822.8553        | 911.9313         | 608.2900        | 18 | E      | 5  | <b>601.2919</b>  | 301.1496         | 201.1021        |
|         | 1909.8873        | <b>955.4473</b>  | 637.3006        | 19 | S      | 4  | <b>472.2493</b>  | 236.6283         | 158.0880        |
|         | 2010.9350        | <b>1005.9711</b> | <b>670.9832</b> | 20 | T      | 3  | 385.2173         | 193.1123         | 129.0773        |
|         | 2139.9776        | <b>1070.4924</b> | <b>713.9974</b> | 21 | E      | 2  | 284.1696         | 142.5884         | 95.3947         |
|         |                  |                  |                 | 22 | K[136] | 1  | 155.1270         | 78.0671          | 52.3805         |

# Annotated spectra from Saleem et. al. 2009

R.AVNPLVTS<sub>167</sub>SPIHMSPLQS<sub>167</sub>R<sub>166</sub>Q/3

0.9395

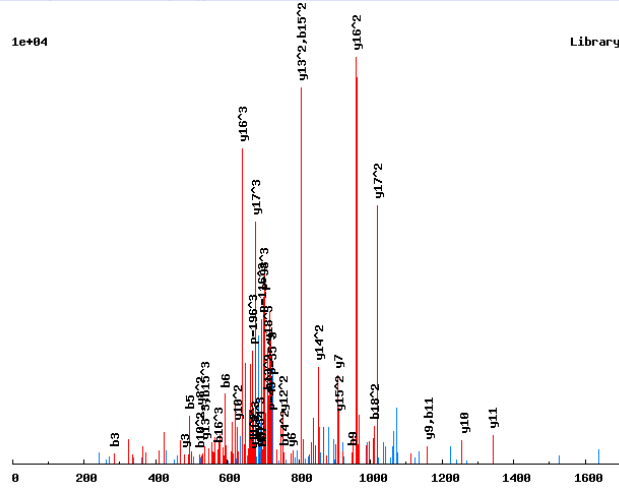

| Library | b <sup>1+</sup> | b <sup>2+</sup> | b <sup>3+</sup> | #  | AA     | #  | y <sup>1+</sup> | y <sup>2+</sup> | y <sup>3+</sup> |
|---------|-----------------|-----------------|-----------------|----|--------|----|-----------------|-----------------|-----------------|
|         | 72.0444         | 36.5258         | 24.6863         | 1  | A      | 19 |                 |                 |                 |
|         | 171.1128        | 86.0600         | 57.7091         | 2  | V      | 18 | 2132.9839       | 1066.9956       | 711.6661        |
|         | 285.1557        | 143.0815        | 95.7234         | 3  | N      | 17 | 2033.9155       | 1017.4614       | 678.6433        |
|         | 382.2085        | 191.6079        | 128.0744        | 4  | P      | 16 | 1919.8725       | 960.4399        | 640.6290        |
|         | 495.2926        | 248.1499        | 165.7690        | 5  | L      | 15 | 1822.8198       | 911.9135        | 608.2781        |
|         | 594.3610        | 297.6841        | 198.7918        | 6  | V      | 14 | 1709.7357       | 855.3715        | 570.5834        |
|         | 695.4086        | 348.2080        | 232.4744        | 7  | T      | 13 | 1610.6673       | 805.8373        | 537.5606        |
|         | 862.4070        | 431.7071        | 288.1405        | 8  | S[167] | 12 | 1509.6196       | 755.3135        | 503.8781        |
|         | 949.4390        | 475.2232        | 317.1512        | 9  | S      | 11 | 1342.6213       | 671.8143        | 448.2119        |
|         | 1046.4918       | 523.7495        | 349.5021        | 10 | P      | 10 | 1255.5892       | 628.2983        | 419.2013        |
|         | 1159.5759       | 580.2916        | 387.1968        | 11 | I      | 9  | 1158.5365       | 579.7719        | 386.8503        |
|         | 1296.6348       | 648.8210        | 432.8831        | 12 | H      | 8  | 1045.4524       | 523.2298        | 349.1557        |
|         | 1427.6753       | 714.3413        | 476.5633        | 13 | M      | 7  | 908.3935        | 454.7004        | 303.4694        |
|         | 1514.7073       | 757.8573        | 505.5739        | 14 | S      | 6  | 777.3530        | 389.1801        | 259.7892        |
|         | 1611.7600       | 806.3837        | 537.9249        | 15 | P      | 5  | 690.3210        | 345.6641        | 230.7785        |
|         | 1724.8441       | 862.9257        | 575.6196        | 16 | L      | 4  | 593.2682        | 297.1378        | 198.4276        |
|         | 1852.9027       | 926.9550        | 618.3057        | 17 | Q      | 3  | 480.1842        | 240.5957        | 160.7329        |
|         | 2019.9010       | 1010.4542       | 673.9719        | 18 | S[167] | 2  | 352.1256        | 176.5664        | 118.0467        |
|         |                 |                 |                 | 19 | R[166] | 1  | 185.1272        | 93.0672         | 62.3806         |

# Annotated spectra from Saleem et. al. 2009

R.AVS<sub>167</sub>SAS<sub>167</sub>INSSLSGSR.A/2

0.9997

1e+04

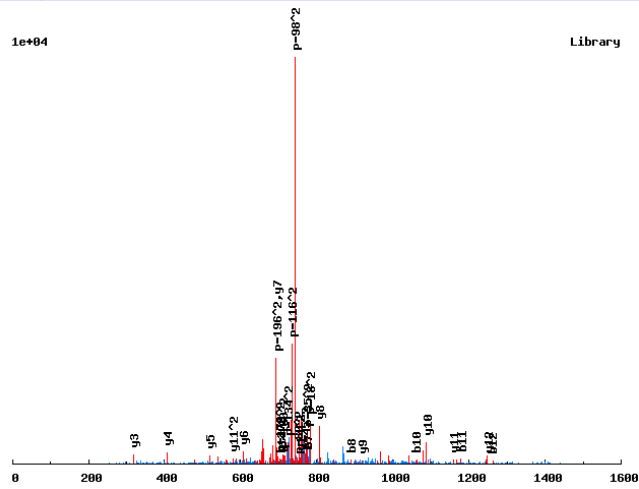

| Library | b <sup>1+</sup> | b <sup>2+</sup> | #  | AA     | #  | y <sup>1+</sup> | y <sup>2+</sup> |
|---------|-----------------|-----------------|----|--------|----|-----------------|-----------------|
|         | 72.0444         | 36.5258         | 1  | A      | 15 |                 |                 |
|         | 171.1128        | 86.0600         | 2  | V      | 14 | 1511.6139       | 756.3106        |
|         | 338.1112        | 169.5592        | 3  | S[167] | 13 | 1412.5454       | 706.7764        |
|         | 425.1432        | 213.0752        | 4  | S      | 12 | 1245.5471       | 623.2772        |
|         | 496.1803        | 248.5938        | 5  | A      | 11 | 1158.5151       | 579.7612        |
|         | 663.1787        | 332.0930        | 6  | S[167] | 10 | 1087.4779       | 544.2426        |
|         | 776.2627        | 388.6350        | 7  | I      | 9  | 920.4796        | 460.7434        |
|         | 890.3057        | 445.6565        | 8  | N      | 8  | 807.3955        | 404.2014        |
|         | 977.3377        | 489.1725        | 9  | S      | 7  | 693.3526        | 347.1799        |
|         | 1064.3697       | 532.6885        | 10 | S      | 6  | 606.3206        | 303.6639        |
|         | 1177.4538       | 589.2305        | 11 | L      | 5  | 519.2885        | 260.1479        |
|         | 1264.4858       | 632.7465        | 12 | S      | 4  | 406.2045        | 203.6059        |
|         | 1321.5073       | 661.2573        | 13 | G      | 3  | 319.1724        | 160.0899        |
|         | 1408.5393       | 704.7733        | 14 | S      | 2  | 262.1510        | 131.5791        |
|         |                 |                 | 15 | R      | 1  | 175.1190        | 88.0631         |

# Annotated spectra from Saleem et. al. 2009

R.AVST<sub>181</sub>ANDNS<sub>167</sub>FLQPPHR.A/2

0.8729

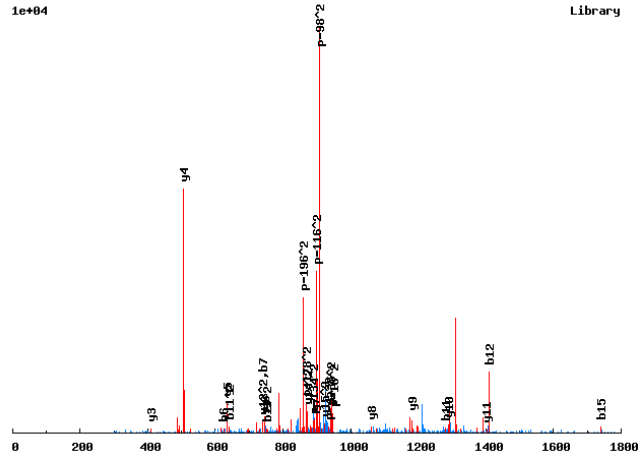

| Library | b <sup>1+</sup> | b <sup>2+</sup> | #  | AA     | #  | y <sup>1+</sup> | y <sup>2+</sup> |
|---------|-----------------|-----------------|----|--------|----|-----------------|-----------------|
|         | 72.0444         | 36.5258         | 1  | A      | 16 |                 |                 |
|         | 171.1128        | 86.0600         | 2  | V      | 15 | 1842.7572       | 921.8822        |
|         | 258.1448        | 129.5761        | 3  | S      | 14 | 1743.6887       | 872.3480        |
|         | 439.1588        | 220.0831        | 4  | T[181] | 13 | 1656.6567       | 828.8320        |
|         | 510.1960        | 255.6016        | 5  | A      | 12 | 1475.6427       | 738.3250        |
|         | 624.2389        | 312.6231        | 6  | N      | 11 | 1404.6056       | 702.8064        |
|         | 739.2658        | 370.1366        | 7  | D      | 10 | 1290.5627       | 645.7850        |
|         | 853.3088        | 427.1580        | 8  | N      | 9  | 1175.5357       | 588.2715        |
|         | 1020.3071       | 510.6572        | 9  | S[167] | 8  | 1061.4928       | 531.2500        |
|         | 1167.3755       | 584.1914        | 10 | F      | 7  | 894.4944        | 447.7509        |
|         | 1280.4596       | 640.7334        | 11 | L      | 6  | 747.4260        | 374.2167        |
|         | 1408.5182       | 704.7627        | 12 | Q      | 5  | 634.3420        | 317.6746        |
|         | 1505.5709       | 753.2891        | 13 | P      | 4  | 506.2834        | 253.6453        |
|         | 1602.6237       | 801.8155        | 14 | P      | 3  | 409.2306        | 205.1189        |
|         | 1739.6826       | 870.3449        | 15 | H      | 2  | 312.1779        | 156.5926        |
|         |                 |                 | 16 | R      | 1  | 175.1190        | 88.0631         |

# Annotated spectra from Saleem et. al. 2009

R.AVSVDSL<sub>243</sub>VANSQSSPLR<sub>166</sub>E/3

0.9932

1e+04

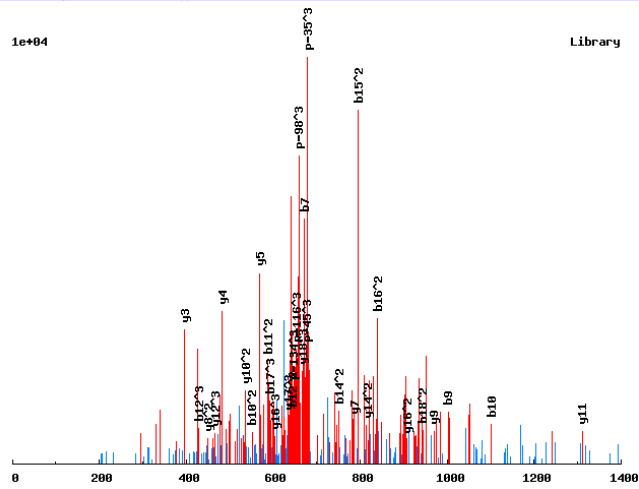

| Library | b <sup>1+</sup> | b <sup>2+</sup> | b <sup>3+</sup> | #  | AA     | #  | y <sup>1+</sup> | y <sup>2+</sup> | y <sup>3+</sup> |
|---------|-----------------|-----------------|-----------------|----|--------|----|-----------------|-----------------|-----------------|
|         | 72.0444         | 36.5258         | 24.6863         | 1  | A      | 19 |                 |                 |                 |
|         | 171.1128        | 86.0600         | 57.7091         | 2  | V      | 18 | 1998.9407       | 999.9740        | 666.9851        |
|         | 258.1448        | 129.5761        | 86.7198         | 3  | S      | 17 | 1899.8723       | 950.4398        | 633.9623        |
|         | 357.2132        | 179.1103        | 119.7426        | 4  | V      | 16 | 1812.8403       | 906.9238        | 604.9516        |
|         | 444.2453        | 222.6263        | 148.7533        | 5  | S      | 15 | 1713.7719       | 857.3896        | 571.9288        |
|         | 559.2722        | 280.1397        | 187.0956        | 6  | D      | 14 | 1626.7398       | 813.8736        | 542.9181        |
|         | 672.3563        | 336.6818        | 224.7903        | 7  | L      | 13 | 1511.7129       | 756.3601        | 504.5758        |
|         | 759.3883        | 380.1978        | 253.8010        | 8  | S      | 12 | 1398.6288       | 699.8181        | 466.8811        |
|         | 1002.4180       | 501.7126        | 334.8108        | 9  | Y[243] | 11 | 1311.5968       | 656.3020        | 437.8705        |
|         | 1101.4864       | 551.2468        | 367.8336        | 10 | V      | 10 | 1068.5672       | 534.7872        | 356.8606        |
|         | 1172.5235       | 586.7654        | 391.5127        | 11 | A      | 9  | 969.4987        | 485.2530        | 323.8378        |
|         | 1286.5664       | 643.7868        | 429.5270        | 12 | N      | 8  | 898.4616        | 449.7345        | 300.1587        |
|         | 1373.5984       | 687.3029        | 458.5377        | 13 | S      | 7  | 784.4187        | 392.7130        | 262.1444        |
|         | 1501.6570       | 751.3322        | 501.2239        | 14 | Q      | 6  | 697.3867        | 349.1970        | 233.1337        |
|         | 1588.6891       | 794.8482        | 530.2345        | 15 | S      | 5  | 569.3281        | 285.1677        | 190.4476        |
|         | 1675.7211       | 838.3642        | 559.2452        | 16 | S      | 4  | 482.2961        | 241.6517        | 161.4369        |
|         | 1772.7738       | 886.8906        | 591.5961        | 17 | P      | 3  | 395.2640        | 198.1357        | 132.4262        |
|         | 1885.8579       | 943.4326        | 629.2908        | 18 | L      | 2  | 298.2113        | 149.6093        | 100.0753        |
|         |                 |                 |                 | 19 | R[166] | 1  | 185.1272        | 93.0672         | 62.3806         |



# Annotated spectra from Saleem et. al. 2009

K.AYIKEDDEK PQS<sub>167</sub>GDET<sub>181</sub>SATKPLSSR.N/3

0.9998

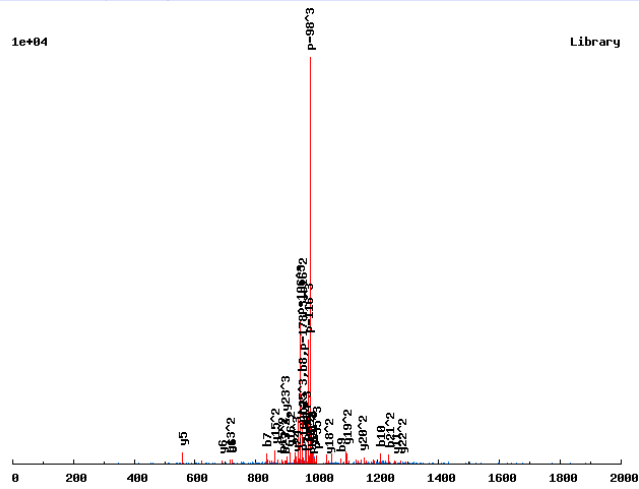

| Library | b <sup>1+</sup> | b <sup>2+</sup> | b <sup>3+</sup> | #  | AA     | #  | y <sup>1+</sup> | y <sup>2+</sup> | y <sup>3+</sup> |
|---------|-----------------|-----------------|-----------------|----|--------|----|-----------------|-----------------|-----------------|
|         | 72.0444         | 36.5258         | 24.6863         | 1  | A      | 26 |                 |                 |                 |
|         | 235.1077        | 118.0575        | 79.0408         | 2  | Y      | 25 | 2956.2496       | 1478.6285       | 986.0881        |
|         | 348.1918        | 174.5995        | 116.7354        | 3  | I      | 24 | 2793.1863       | 1397.0968       | 931.7336        |
|         | 476.2867        | 238.6470        | 159.4338        | 4  | K      | 23 | 2680.1022       | 1340.5548       | 894.0389        |
|         | 605.3293        | 303.1683        | 202.4480        | 5  | E      | 22 | 2552.0073       | 1276.5073       | 851.3406        |
|         | 720.3563        | 360.6818        | 240.7903        | 6  | D      | 21 | 2422.9647       | 1211.9860       | 808.3264        |
|         | 835.3832        | 418.1952        | 279.1326        | 7  | D      | 20 | 2307.9377       | 1154.4725       | 769.9841        |
|         | 950.4101        | 475.7087        | 317.4749        | 8  | D      | 19 | 2192.9108       | 1096.9590       | 731.6418        |
|         | 1079.4527       | 540.2300        | 360.4891        | 9  | E      | 18 | 2077.8839       | 1039.4456       | 693.2995        |
|         | 1207.5477       | 604.2775        | 403.1874        | 10 | K      | 17 | 1948.8413       | 974.9243        | 650.2853        |
|         | 1304.6005       | 652.8039        | 435.5383        | 11 | P      | 16 | 1820.7463       | 910.8768        | 607.5870        |
|         | 1432.6590       | 716.8332        | 478.2245        | 12 | Q      | 15 | 1723.6936       | 862.3504        | 575.2360        |
|         | 1599.6574       | 800.3323        | 533.8907        | 13 | S[167] | 14 | 1595.6350       | 798.3211        | 532.5498        |
|         | 1656.6789       | 828.8431        | 552.8978        | 14 | G      | 13 | 1428.6366       | 714.8219        | 476.8837        |
|         | 1771.7058       | 886.3565        | 591.2401        | 15 | D      | 12 | 1371.6152       | 686.3112        | 457.8766        |
|         | 1900.7484       | 950.8778        | 634.2543        | 16 | E      | 11 | 1256.5882       | 628.7977        | 419.5343        |
|         | 2081.7624       | 1041.3848       | 694.5923        | 17 | T[181] | 10 | 1127.5456       | 564.2765        | 376.5201        |
|         | 2168.7944       | 1084.9009       | 723.6030        | 18 | S      | 9  | 946.5316        | 473.7694        | 316.1821        |
|         | 2239.8315       | 1120.4194       | 747.2820        | 19 | A      | 8  | 859.4996        | 430.2534        | 287.1714        |
|         | 2340.8792       | 1170.9433       | 780.9646        | 20 | T      | 7  | 788.4625        | 394.7349        | 263.4923        |
|         | 2468.9742       | 1234.9907       | 823.6629        | 21 | K      | 6  | 687.4148        | 344.2110        | 229.8098        |
|         | 2566.0269       | 1283.5171       | 856.0138        | 22 | P      | 5  | 559.3198        | 280.1636        | 187.1115        |
|         | 2679.1110       | 1340.0591       | 893.7085        | 23 | L      | 4  | 462.2671        | 231.6372        | 154.7605        |
|         | 2766.1430       | 1383.5752       | 922.7192        | 24 | S      | 3  | 349.1830        | 175.0951        | 117.0659        |
|         | 2853.1751       | 1427.0912       | 951.7299        | 25 | S      | 2  | 262.1510        | 131.5791        | 88.0552         |
|         |                 |                 |                 | 26 | R      | 1  | 175.1190        | 88.0631         | 59.0445         |

# Annotated spectra from Saleem et. al. 2009

R.AY<sub>243</sub>SGDISAADDNLNPFER.Y/2

0.9998

1e+04

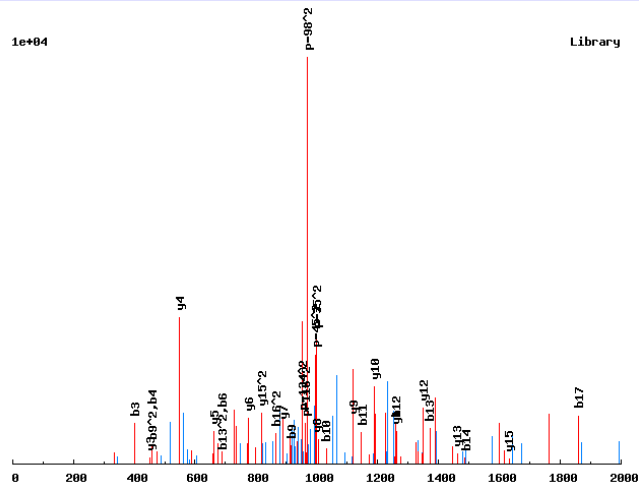

| Library | b <sup>1+</sup> | b <sup>2+</sup> | #  | AA     | #  | y <sup>1+</sup> | y <sup>2+</sup> |
|---------|-----------------|-----------------|----|--------|----|-----------------|-----------------|
|         | 72.0444         | 36.5258         | 1  | A      | 18 |                 |                 |
|         | 315.0741        | 158.0407        | 2  | Y[243] | 17 | 1963.8069       | 982.4071        |
|         | 402.1061        | 201.5567        | 3  | S      | 16 | 1720.7773       | 860.8923        |
|         | 459.1275        | 230.0674        | 4  | G      | 15 | 1633.7452       | 817.3763        |
|         | 574.1545        | 287.5809        | 5  | D      | 14 | 1576.7238       | 788.8655        |
|         | 687.2385        | 344.1229        | 6  | I      | 13 | 1461.6968       | 731.3520        |
|         | 774.2706        | 387.6389        | 7  | S      | 12 | 1348.6128       | 674.8100        |
|         | 845.3077        | 423.1575        | 8  | A      | 11 | 1261.5807       | 631.2940        |
|         | 916.3448        | 458.6760        | 9  | A      | 10 | 1190.5436       | 595.7754        |
|         | 1031.3717       | 516.1895        | 10 | D      | 9  | 1119.5065       | 560.2569        |
|         | 1146.3987       | 573.7030        | 11 | D      | 8  | 1004.4796       | 502.7434        |
|         | 1260.4416       | 630.7244        | 12 | N      | 7  | 889.4526        | 445.2300        |
|         | 1373.5257       | 687.2665        | 13 | L      | 6  | 775.4097        | 388.2085        |
|         | 1487.5686       | 744.2879        | 14 | N      | 5  | 662.3256        | 331.6665        |
|         | 1584.6214       | 792.8143        | 15 | P      | 4  | 548.2827        | 274.6450        |
|         | 1731.6898       | 866.3485        | 16 | F      | 3  | 451.2299        | 226.1186        |
|         | 1860.7324       | 930.8698        | 17 | E      | 2  | 304.1615        | 152.5844        |
|         |                 |                 | 18 | R      | 1  | 175.1190        | 88.0631         |

# Annotated spectra from Saleem et. al. 2009

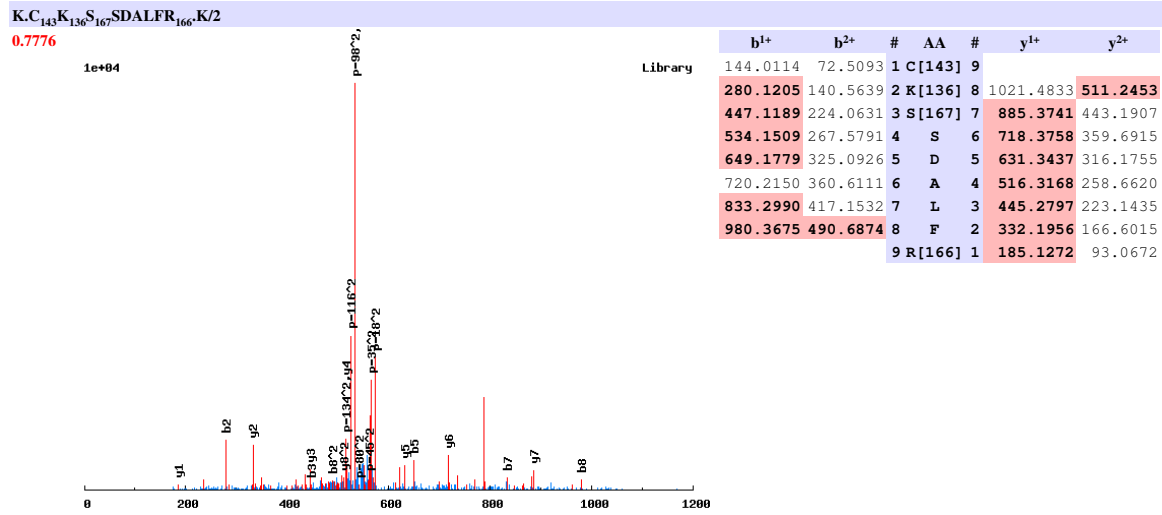

# Annotated spectra from Saleem et. al. 2009

K.C<sub>143</sub>SDSQDAGQPS<sub>167</sub>REGS<sub>167</sub>ITK.K/2

0.7721

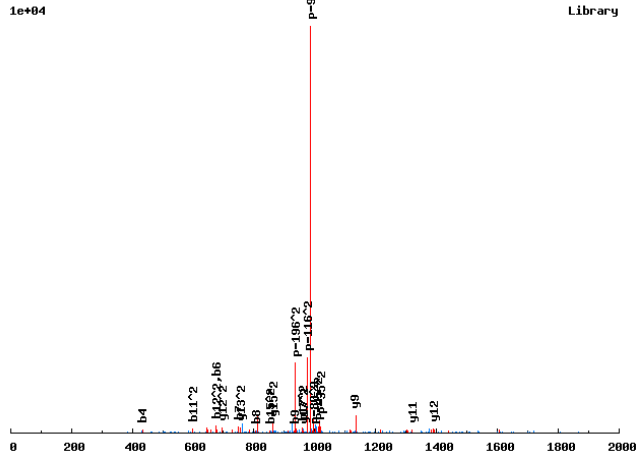

| Library | b <sup>1+</sup> | b <sup>2+</sup> | #  | AA | #     | y <sup>1+</sup> | y <sup>2+</sup> |          |
|---------|-----------------|-----------------|----|----|-------|-----------------|-----------------|----------|
|         | 144.0114        | 72.5093         | 1  | C  | [143] | 18              |                 |          |
|         | 231.0434        | 116.0253        | 2  | S  | 17    | 1922.7529       | 961.8801        |          |
|         | 346.0704        | 173.5388        | 3  | D  | 16    | 1835.7208       | 918.3641        |          |
|         | 433.1024        | 217.0548        | 4  | S  | 15    | 1720.6939       | 860.8506        |          |
|         | 561.1610        | 281.0841        | 5  | Q  | 14    | 1633.6619       | 817.3346        |          |
|         | 676.1879        | 338.5976        | 6  | D  | 13    | 1505.6033       | 753.3053        |          |
|         | 747.2250        | 374.1161        | 7  | A  | 12    | 1390.5763       | 695.7918        |          |
|         | 804.2465        | 402.6269        | 8  | G  | 11    | 1319.5392       | 660.2733        |          |
|         | 932.3051        | 466.6562        | 9  | Q  | 10    | 1262.5178       | 631.7625        |          |
|         | 1029.3578       | 515.1825        | 10 | P  | 9     | 1134.4592       | 567.7332        |          |
|         | 1196.3562       | 598.6817        | 11 | S  | [167] | 8               | 1037.4064       | 519.2069 |
|         | 1352.4573       | 676.7323        | 12 | R  | 7     | 870.4081        | 435.7077        |          |
|         | 1481.4999       | 741.2536        | 13 | E  | 6     | 714.3070        | 357.6571        |          |
|         | 1538.5213       | 769.7643        | 14 | G  | 5     | 585.2644        | 293.1358        |          |
|         | 1705.5197       | 853.2635        | 15 | S  | [167] | 4               | 528.2429        | 264.6251 |
|         | 1818.6038       | 909.8055        | 16 | I  | 3     | 361.2445        | 181.1259        |          |
|         | 1919.6514       | 960.3294        | 17 | T  | 2     | 248.1605        | 124.5839        |          |
|         |                 |                 | 18 | K  | 1     | 147.1128        | 74.0600         |          |

# Annotated spectra from Saleem et. al. 2009

K.C<sub>143</sub>SPLTSVVS<sub>167</sub>NK<sub>136</sub>S<sub>167</sub>EK<sub>136</sub>S/2

0.62

1e+04

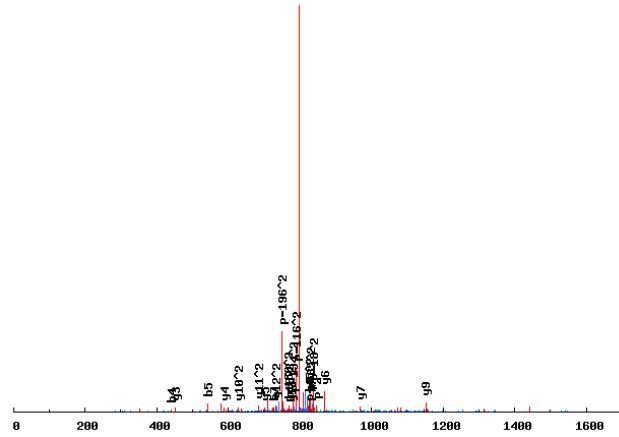

| Library | b <sup>1+</sup> | b <sup>2+</sup> | #  | AA     | #  | y <sup>1+</sup> | y <sup>2+</sup> |
|---------|-----------------|-----------------|----|--------|----|-----------------|-----------------|
|         | 144.0114        | 72.5093         | 1  | C[143] | 14 |                 |                 |
|         | 231.0434        | 116.0253        | 2  | S      | 13 | 1551.7038       | 776.3555        |
|         | 328.0962        | 164.5517        | 3  | P      | 12 | 1464.6717       | 732.8395        |
|         | 441.1802        | 221.0938        | 4  | L      | 11 | 1367.6190       | 684.3131        |
|         | 542.2279        | 271.6176        | 5  | T      | 10 | 1254.5349       | 627.7711        |
|         | 629.2599        | 315.1336        | 6  | S      | 9  | 1153.4872       | 577.2473        |
|         | 728.3284        | 364.6678        | 7  | V      | 8  | 1066.4552       | 533.7312        |
|         | 827.3968        | 414.2020        | 8  | V      | 7  | 967.3868        | 484.1970        |
|         | 994.3951        | 497.7012        | 9  | S[167] | 6  | 868.3184        | 434.6628        |
|         | 1108.4381       | 554.7227        | 10 | N      | 5  | 701.3200        | 351.1637        |
|         | 1244.5472       | 622.7772        | 11 | K[136] | 4  | 587.2771        | 294.1422        |
|         | 1411.5456       | 706.2764        | 12 | S[167] | 3  | 451.1679        | 226.0876        |
|         | 1540.5882       | 770.7977        | 13 | E      | 2  | 284.1696        | 142.5884        |
|         |                 |                 | 14 | K[136] | 1  | 155.1270        | 78.0671         |

# Annotated spectra from Saleem et. al. 2009

K.C<sub>143</sub>TGGGHILTAS<sub>167</sub>HNPGGPENDLGIK<sub>136</sub>Y/3

0.9996

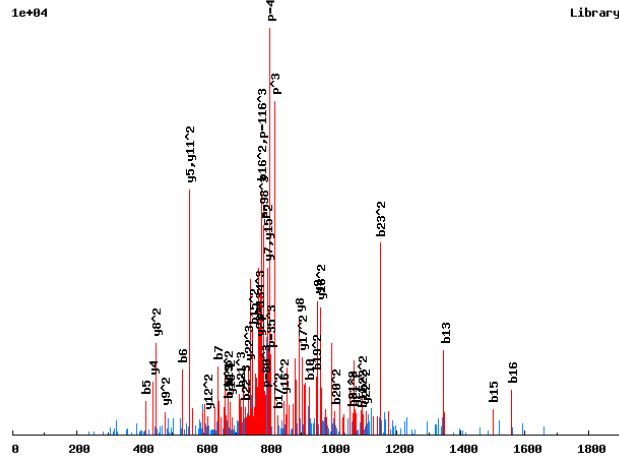

| Library | b <sup>1+</sup> | b <sup>2+</sup> | b <sup>3+</sup> | #  | AA     | #  | y <sup>1+</sup> | y <sup>2+</sup> | y <sup>3+</sup> |
|---------|-----------------|-----------------|-----------------|----|--------|----|-----------------|-----------------|-----------------|
|         | 144.0114        | 72.5093         | 48.6753         | 1  | C[143] | 24 |                 |                 |                 |
|         | 245.0591        | 123.0332        | 82.3579         | 2  | T      | 23 | 2306.1267       | 1153.5670       | 769.3804        |
|         | 302.0805        | 151.5439        | 101.3650        | 3  | G      | 22 | 2205.0790       | 1103.0432       | 735.6979        |
|         | 359.1020        | 180.0546        | 120.3722        | 4  | G      | 21 | 2148.0576       | 1074.5324       | 716.6907        |
|         | 416.1234        | 208.5654        | 139.3793        | 5  | G      | 20 | 2091.0361       | 1046.0217       | 697.6836        |
|         | 529.2075        | 265.1074        | 177.0740        | 6  | I      | 19 | 2034.0146       | 1017.5110       | 678.6764        |
|         | 642.2916        | 321.6494        | 214.7687        | 7  | I      | 18 | 1920.9306       | 960.9689        | 640.9817        |
|         | 755.3756        | 378.1915        | 252.4634        | 8  | L      | 17 | 1807.8465       | 904.4269        | 603.2870        |
|         | 856.4233        | 428.7153        | 286.1460        | 9  | T      | 16 | 1694.7625       | 847.8849        | 565.5923        |
|         | 927.4604        | 464.2338        | 309.8250        | 10 | A      | 15 | 1593.7148       | 797.3610        | 531.9098        |
|         | 1094.4588       | 547.7330        | 365.4911        | 11 | S[167] | 14 | 1522.6777       | 761.8425        | 508.2307        |
|         | 1231.5177       | 616.2625        | 411.1774        | 12 | H      | 13 | 1355.6793       | 678.3433        | 452.5646        |
|         | 1345.5606       | 673.2839        | 449.1917        | 13 | N      | 12 | 1218.6204       | 609.8138        | 406.8783        |
|         | 1442.6134       | 721.8103        | 481.5426        | 14 | P      | 11 | 1104.5775       | 552.7924        | 368.8640        |
|         | 1499.6348       | 750.3211        | 500.5498        | 15 | G      | 10 | 1007.5247       | 504.2660        | 336.5131        |
|         | 1556.6563       | 778.8318        | 519.5570        | 16 | G      | 9  | 950.5033        | 475.7553        | 317.5059        |
|         | 1653.7091       | 827.3582        | 551.9079        | 17 | P      | 8  | 893.4818        | 447.2445        | 298.4988        |
|         | 1782.7516       | 891.8795        | 594.9221        | 18 | E      | 7  | 796.4290        | 398.7182        | 266.1479        |
|         | 1896.7946       | 948.9009        | 632.9364        | 19 | N      | 6  | 667.3864        | 334.1969        | 223.1337        |
|         | 2011.8215       | 1006.4144       | 671.2787        | 20 | D      | 5  | 553.3435        | 277.1754        | 185.1194        |
|         | 2124.9056       | 1062.9564       | 708.9734        | 21 | L      | 4  | 438.3166        | 219.6619        | 146.7770        |
|         | 2181.9270       | 1091.4672       | 727.9805        | 22 | G      | 3  | 325.2325        | 163.1199        | 109.0824        |
|         | 2295.0111       | 1148.0092       | 765.6752        | 23 | I      | 2  | 268.2111        | 134.6092        | 90.0752         |
|         |                 |                 |                 | 24 | K[136] | 1  | 155.1270        | 78.0671         | 52.3805         |

Annotated spectra from Saleem et. al. 2009

K.C<sub>143</sub>TGGHILTAS<sub>167</sub>HNPGPNDMGIK<sub>136</sub>.Y/3

0.9997

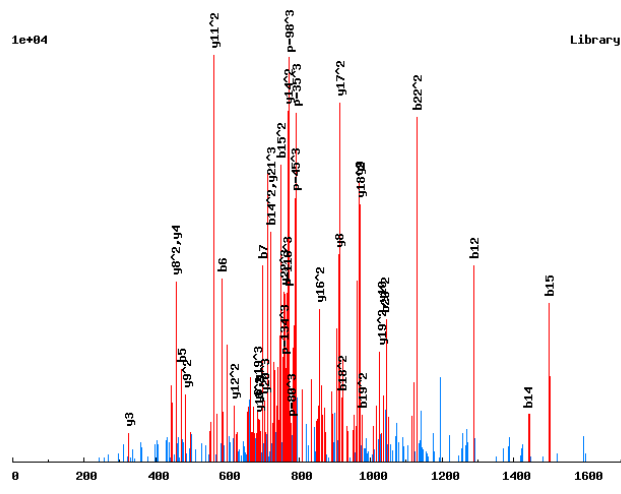

| Library | b <sup>1+</sup>  | b <sup>2+</sup>  | b <sup>3+</sup> | #  | AA     | #  | y <sup>1+</sup>  | y <sup>2+</sup>  | y <sup>3+</sup> |
|---------|------------------|------------------|-----------------|----|--------|----|------------------|------------------|-----------------|
|         | 144.0114         | 72.5093          | 48.6753         | 1  | C[143] | 23 |                  |                  |                 |
|         | 245.0591         | 123.0332         | 82.3579         | 2  | T      | 22 | 2267.0617        | 1134.0345        | <b>756.3587</b> |
|         | 302.0805         | 151.5439         | 101.3650        | 3  | G      | 21 | 2166.0140        | 1083.5106        | <b>722.6762</b> |
|         | 359.1020         | 180.0546         | 120.3722        | 4  | G      | 20 | 2108.9925        | 1054.9999        | <b>703.6690</b> |
|         | <b>472.1860</b>  | 236.5967         | 158.0669        | 5  | I      | 19 | 2051.9711        | <b>1026.4892</b> | <b>684.6619</b> |
|         | <b>585.2701</b>  | 293.1387         | 195.7616        | 6  | I      | 18 | 1938.8870        | <b>969.9471</b>  | 646.9672        |
|         | <b>698.3542</b>  | 349.6807         | 233.4562        | 7  | L      | 17 | 1825.8030        | <b>913.4051</b>  | 609.2725        |
|         | 799.4018         | 400.2046         | 267.1388        | 8  | T      | 16 | 1712.7189        | <b>856.8631</b>  | 571.5778        |
|         | 870.4390         | 435.7231         | 290.8178        | 9  | A      | 15 | 1611.6712        | 806.3392         | 537.8953        |
|         | 1037.4373        | 519.2223         | 346.4840        | 10 | S[167] | 14 | 1540.6341        | <b>770.8207</b>  | 514.2162        |
|         | 1174.4962        | 587.7518         | 392.1703        | 11 | H      | 13 | 1373.6357        | <b>687.3215</b>  | 458.5501        |
|         | <b>1288.5392</b> | 644.7732         | 430.1846        | 12 | N      | 12 | 1236.5768        | <b>618.7921</b>  | 412.8638        |
|         | 1385.5919        | 693.2996         | 462.5355        | 13 | P      | 11 | 1122.5339        | <b>561.7706</b>  | 374.8495        |
|         | <b>1442.6134</b> | <b>721.8103</b>  | 481.5426        | 14 | G      | 10 | <b>1025.4811</b> | 513.2442         | 342.4986        |
|         | <b>1499.6348</b> | <b>750.3211</b>  | 500.5498        | 15 | G      | 9  | <b>968.4597</b>  | <b>484.7335</b>  | 323.4914        |
|         | 1596.6876        | 798.8474         | 532.9007        | 16 | P      | 8  | <b>911.4382</b>  | <b>456.2228</b>  | 304.4843        |
|         | 1725.7302        | 863.3687         | 575.9149        | 17 | E      | 7  | 814.3855         | 407.6964         | 272.1333        |
|         | 1839.7731        | <b>920.3902</b>  | 613.9292        | 18 | N      | 6  | <b>685.3429</b>  | 343.1751         | 229.1191        |
|         | 1954.8001        | <b>977.9037</b>  | 652.2715        | 19 | D      | 5  | 571.2999         | 286.1536         | 191.1048        |
|         | 2085.8405        | <b>1043.4239</b> | 695.9517        | 20 | M      | 4  | <b>456.2730</b>  | 228.6401         | 152.7625        |
|         | 2142.8620        | 1071.9346        | 714.9589        | 21 | G      | 3  | <b>325.2325</b>  | 163.1199         | 109.0824        |
|         | 2255.9461        | <b>1128.4767</b> | 752.6535        | 22 | I      | 2  | 268.2111         | 134.6092         | 90.0752         |
|         |                  |                  |                 | 23 | K[136] | 1  | 155.1270         | 78.0671          | 52.3805         |

# Annotated spectra from Saleem et. al. 2009

K.DADS<sub>167</sub>HSDNDHSDPNVPSDVHLR<sub>166</sub>M/4

0.9778

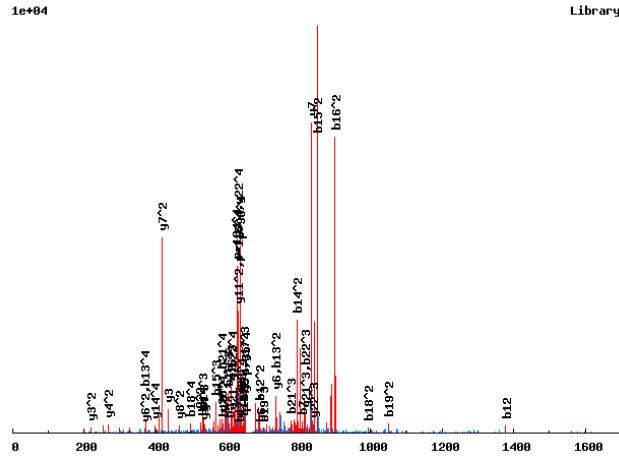

| Library | b <sup>1+</sup> | b <sup>2+</sup> | b <sup>3+</sup> | b <sup>4+</sup> | #  | AA     | #  | y <sup>1+</sup> | y <sup>2+</sup> | y <sup>3+</sup> | y <sup>4+</sup> |
|---------|-----------------|-----------------|-----------------|-----------------|----|--------|----|-----------------|-----------------|-----------------|-----------------|
|         | 116.0342        | 58.5207         | 39.3496         | 29.7640         | 1  | D      | 23 |                 |                 |                 |                 |
|         | 187.0713        | 94.0393         | 63.0286         | 47.5233         | 2  | A      | 22 | 2519.0094       | 1260.0083       | 840.3413        | 630.5078        |
|         | 302.0983        | 151.5528        | 101.3709        | 76.2800         | 3  | D      | 21 | 2447.9723       | 1224.4898       | 816.6623        | 612.7485        |
|         | 469.0966        | 235.0520        | 157.0371        | 118.0296        | 4  | S[167] | 20 | 2332.9454       | 1166.9763       | 778.3200        | 583.9918        |
|         | 606.1555        | 303.5814        | 202.7234        | 152.2943        | 5  | H      | 19 | 2165.9470       | 1083.4771       | 722.6539        | 542.2422        |
|         | 693.1876        | 347.0974        | 231.7340        | 174.0524        | 6  | S      | 18 | 2028.8881       | 1014.9477       | 676.9675        | 507.9775        |
|         | 808.2145        | 404.6109        | 270.0764        | 202.8091        | 7  | D      | 17 | 1941.8561       | 971.4317        | 647.9569        | 486.2195        |
|         | 922.2574        | 461.6324        | 308.0907        | 231.3198        | 8  | N      | 16 | 1826.8291       | 913.9182        | 609.6146        | 457.4627        |
|         | 1037.2844       | 519.1458        | 346.4330        | 260.0766        | 9  | D      | 15 | 1712.7862       | 856.8967        | 571.6002        | 428.9520        |
|         | 1174.3433       | 587.6753        | 392.1193        | 294.3413        | 10 | H      | 14 | 1597.7592       | 799.3833        | 533.2579        | 400.1953        |
|         | 1289.3702       | 645.1888        | 430.4616        | 323.0980        | 11 | D      | 13 | 1460.7003       | 730.8538        | 487.5716        | 365.9305        |
|         | 1376.4023       | 688.7048        | 459.4723        | 344.8560        | 12 | S      | 12 | 1345.6734       | 673.3403        | 449.2293        | 337.1738        |
|         | 1473.4550       | 737.2312        | 491.8232        | 369.1192        | 13 | P      | 11 | 1258.6414       | 629.8243        | 420.2186        | 315.4158        |
|         | 1588.4820       | 794.7446        | 530.1655        | 397.8760        | 14 | D      | 10 | 1161.5886       | 581.2979        | 387.8677        | 291.1526        |
|         | 1702.5249       | 851.7661        | 568.1798        | 426.3867        | 15 | N      | 9  | 1046.5617       | 523.7845        | 349.5254        | 262.3959        |
|         | 1801.5933       | 901.3003        | 601.2026        | 451.1538        | 16 | V      | 8  | 932.5187        | 466.7630        | 311.5111        | 233.8851        |
|         | 1898.6461       | 949.8267        | 633.5535        | 475.4170        | 17 | P      | 7  | 833.4503        | 417.2288        | 278.4883        | 209.1180        |
|         | 1985.6781       | 993.3427        | 662.5642        | 497.1750        | 18 | S      | 6  | 736.3976        | 368.7024        | 246.1374        | 184.8549        |
|         | 2100.7050       | 1050.8562       | 700.9065        | 525.9317        | 19 | D      | 5  | 649.3655        | 325.1864        | 217.1267        | 163.0968        |
|         | 2199.7734       | 1100.3904       | 733.9293        | 550.6988        | 20 | V      | 4  | 534.3386        | 267.6729        | 178.7844        | 134.3401        |
|         | 2336.8324       | 1168.9198       | 779.6156        | 584.9635        | 21 | H      | 3  | 435.2702        | 218.1387        | 145.7616        | 109.5730        |
|         | 2449.9164       | 1225.4618       | 817.3103        | 613.2346        | 22 | L      | 2  | 298.2113        | 149.6093        | 100.0753        | 75.3083         |
|         |                 |                 |                 |                 | 23 | R[166] | 1  | 185.1272        | 93.0672         | 62.3806         | 47.0373         |



# Annotated spectra from Saleem et. al. 2009

R.DAETADIGDQSEVES<sub>167</sub>DT<sub>181</sub>EELK<sub>136</sub>K<sub>136</sub>I/3

0.6791

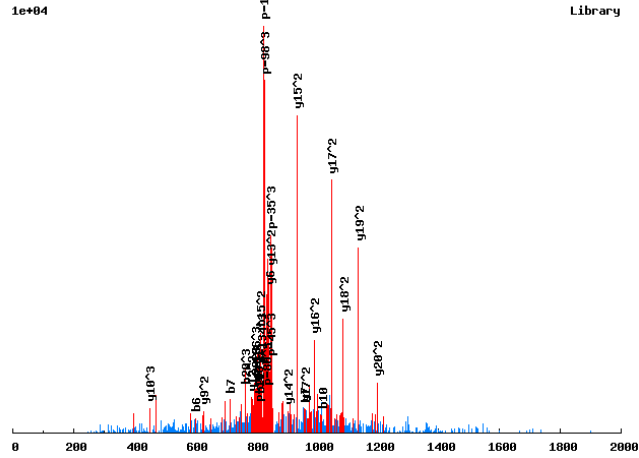

| Library | b <sup>1+</sup> | b <sup>2+</sup> | b <sup>3+</sup> | #  | AA     | #  | y <sup>1+</sup> | y <sup>2+</sup> | y <sup>3+</sup> |
|---------|-----------------|-----------------|-----------------|----|--------|----|-----------------|-----------------|-----------------|
|         | 116.0342        | 58.5207         | 39.3496         | 1  | D      | 22 |                 |                 |                 |
|         | 187.0713        | 94.0393         | 63.0286         | 2  | A      | 21 | 2470.0128       | 1235.5100       | 824.0091        |
|         | 316.1139        | 158.5606        | 106.0428        | 3  | E      | 20 | 2398.9757       | 1199.9915       | 800.3301        |
|         | 417.1616        | 209.0844        | 139.7254        | 4  | T      | 19 | 2269.9331       | 1135.4702       | 757.3159        |
|         | 488.1987        | 244.6030        | 163.4044        | 5  | A      | 18 | 2168.8854       | 1084.9463       | 723.6333        |
|         | 603.2256        | 302.1165        | 201.7467        | 6  | D      | 17 | 2097.8483       | 1049.4278       | 699.9543        |
|         | 716.3097        | 358.6585        | 239.4414        | 7  | I      | 16 | 1982.8214       | 991.9143        | 661.6120        |
|         | 773.3312        | 387.1692        | 258.4486        | 8  | G      | 15 | 1869.7373       | 935.3723        | 623.9173        |
|         | 888.3581        | 444.6827        | 296.7909        | 9  | D      | 14 | 1812.7158       | 906.8616        | 604.9101        |
|         | 1016.4167       | 508.7120        | 339.4771        | 10 | Q      | 13 | 1697.6889       | 849.3481        | 566.5678        |
|         | 1103.4487       | 552.2280        | 368.4878        | 11 | S      | 12 | 1569.6303       | 785.3188        | 523.8816        |
|         | 1232.4913       | 616.7493        | 411.5020        | 12 | E      | 11 | 1482.5983       | 741.8028        | 494.8710        |
|         | 1331.5597       | 666.2835        | 444.5248        | 13 | V      | 10 | 1353.5557       | 677.2815        | 451.8568        |
|         | 1460.6023       | 730.8048        | 487.5390        | 14 | E      | 9  | 1254.4873       | 627.7473        | 418.8340        |
|         | 1627.6007       | 814.3040        | 543.2051        | 15 | S[167] | 8  | 1125.4447       | 563.2260        | 375.8198        |
|         | 1742.6276       | 871.8174        | 581.5474        | 16 | D      | 7  | 958.4463        | 479.7268        | 320.1536        |
|         | 1923.6416       | 962.3245        | 641.8854        | 17 | T[181] | 6  | 843.4194        | 422.2133        | 281.8113        |
|         | 2052.6842       | 1026.8457       | 684.8996        | 18 | E      | 5  | 662.4054        | 331.7063        | 221.4733        |
|         | 2181.7268       | 1091.3670       | 727.9138        | 19 | E      | 4  | 533.3628        | 267.1850        | 178.4591        |
|         | 2294.8109       | 1147.9091       | 765.6085        | 20 | L      | 3  | 404.3202        | 202.6637        | 135.4449        |
|         | 2430.9200       | 1215.9637       | 810.9782        | 21 | K[136] | 2  | 291.2362        | 146.1217        | 97.7502         |
|         |                 |                 |                 | 22 | K[136] | 1  | 155.1270        | 78.0671         | 52.3805         |

# Annotated spectra from Saleem et. al. 2009

K.DAFLEATS<sub>167</sub>EDEIHS<sub>167</sub>R.A/2

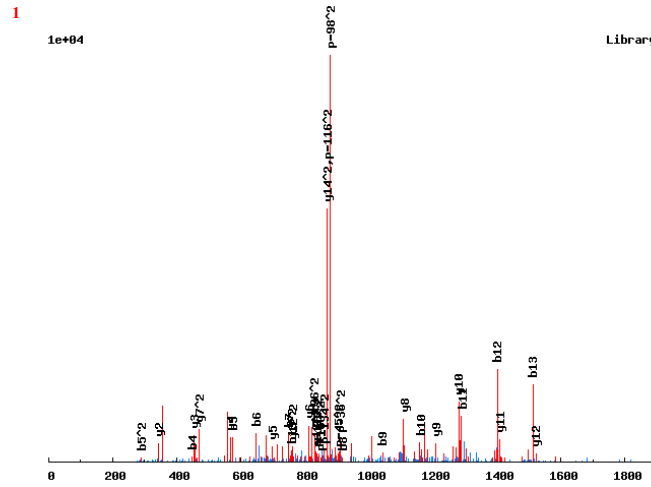

| Library | b <sup>1+</sup> | b <sup>2+</sup> | #  | AA      | #  | y <sup>1+</sup> | y <sup>2+</sup> |
|---------|-----------------|-----------------|----|---------|----|-----------------|-----------------|
|         | 116.0342        | 58.5207         | 1  | D       | 15 |                 |                 |
|         | 187.0713        | 94.0393         | 2  | A       | 14 | 1740.7129       | 870.8601        |
|         | 334.1397        | 167.5735        | 3  | F       | 13 | 1669.6758       | 835.3415        |
|         | 447.2238        | 224.1155        | 4  | L       | 12 | 1522.6074       | 761.8073        |
|         | 576.2664        | 288.6368        | 5  | E       | 11 | 1409.5233       | 705.2653        |
|         | 647.3035        | 324.1554        | 6  | A       | 10 | 1280.4807       | 640.7440        |
|         | 748.3512        | 374.6792        | 7  | T       | 9  | 1209.4436       | 605.2254        |
|         | 915.3495        | 458.1784        | 8  | S [167] | 8  | 1108.3959       | 554.7016        |
|         | 1044.3921       | 522.6997        | 9  | E       | 7  | 941.3976        | 471.2024        |
|         | 1159.4191       | 580.2132        | 10 | D       | 6  | 812.3550        | 406.6811        |
|         | 1288.4617       | 644.7345        | 11 | E       | 5  | 697.3280        | 349.1677        |
|         | 1401.5457       | 701.2765        | 12 | I       | 4  | 568.2854        | 284.6464        |
|         | 1514.6298       | 757.8185        | 13 | I       | 3  | 455.2014        | 228.1043        |
|         | 1681.6281       | 841.3177        | 14 | S [167] | 2  | 342.1173        | 171.5623        |
|         |                 |                 | 15 | R       | 1  | 175.1190        | 88.0631         |

Annotated spectra from Saleem et. al. 2009

K.DAFLEATS<sub>167</sub>EDEHSR<sub>166</sub>-A/2

0.9998

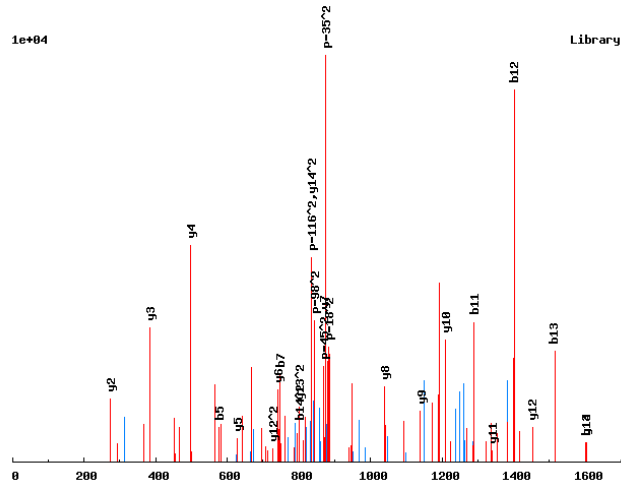

| Library | b <sup>1+</sup> | b <sup>2+</sup> | #  | AA     | #  | y <sup>1+</sup> | y <sup>2+</sup> |
|---------|-----------------|-----------------|----|--------|----|-----------------|-----------------|
|         | 116.0342        | 58.5207         | 1  | D      | 15 |                 |                 |
|         | 187.0713        | 94.0393         | 2  | A      | 14 | 1670.7548       | 835.8810        |
|         | 334.1397        | 167.5735        | 3  | F      | 13 | 1599.7177       | 800.3625        |
|         | 447.2238        | 224.1155        | 4  | L      | 12 | 1452.6493       | 726.8283        |
|         | 576.2664        | 288.6368        | 5  | E      | 11 | 1339.5652       | 670.2863        |
|         | 647.3035        | 324.1554        | 6  | A      | 10 | 1210.5226       | 605.7650        |
|         | 748.3512        | 374.6792        | 7  | T      | 9  | 1139.4855       | 570.2464        |
|         | 915.3495        | 458.1784        | 8  | S[167] | 8  | 1038.4379       | 519.7226        |
|         | 1044.3921       | 522.6997        | 9  | E      | 7  | 871.4395        | 436.2234        |
|         | 1159.4191       | 580.2132        | 10 | D      | 6  | 742.3969        | 371.7021        |
|         | 1288.4617       | 644.7345        | 11 | E      | 5  | 627.3700        | 314.1886        |
|         | 1401.5457       | 701.2765        | 12 | I      | 4  | 498.3274        | 249.6673        |
|         | 1514.6298       | 757.8185        | 13 | I      | 3  | 385.2433        | 193.1253        |
|         | 1601.6618       | 801.3345        | 14 | S      | 2  | 272.1592        | 136.5833        |
|         |                 |                 | 15 | R[166] | 1  | 185.1272        | 93.0672         |

# Annotated spectra from Saleem et. al. 2009

R.DAK<sub>136</sub>S<sub>167</sub>SAES<sub>167</sub>SNATNNNTLGTESK<sub>136</sub>L/2

0.7597

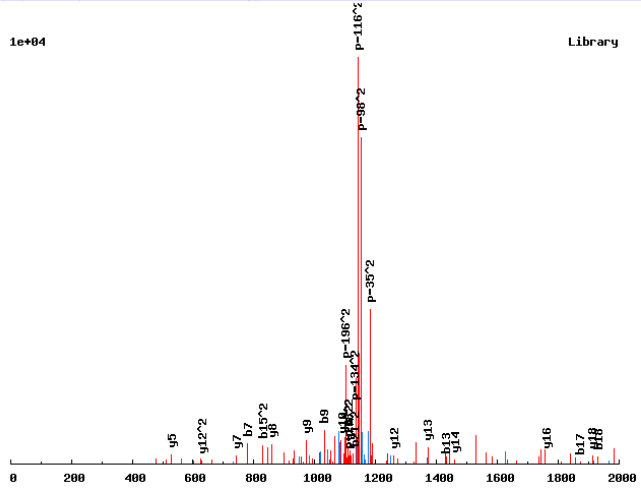

| Library | b <sup>1+</sup> | b <sup>2+</sup> | #  | AA     | #  | y <sup>1+</sup> | y <sup>2+</sup> |
|---------|-----------------|-----------------|----|--------|----|-----------------|-----------------|
|         | 116.0342        | 58.5207         | 1  | D      | 22 |                 |                 |
|         | 187.0713        | 94.0393         | 2  | A      | 21 | 2286.9458       | 1143.9765       |
|         | 323.1805        | 162.0939        | 3  | K[136] | 20 | 2215.9086       | 1108.4580       |
|         | 490.1788        | 245.5931        | 4  | S[167] | 19 | 2079.7995       | 1040.4034       |
|         | 577.2109        | 289.1091        | 5  | S      | 18 | 1912.8011       | 956.9042        |
|         | 648.2480        | 324.6276        | 6  | A      | 17 | 1825.7691       | 913.3882        |
|         | 777.2906        | 389.1489        | 7  | E      | 16 | 1754.7320       | 877.8696        |
|         | 944.2889        | 472.6481        | 8  | S[167] | 15 | 1625.6894       | 813.3483        |
|         | 1031.3210       | 516.1641        | 9  | S      | 14 | 1458.6910       | 729.8492        |
|         | 1145.3639       | 573.1856        | 10 | N      | 13 | 1371.6590       | 686.3331        |
|         | 1216.4010       | 608.7041        | 11 | A      | 12 | 1257.6161       | 629.3117        |
|         | 1317.4487       | 659.2280        | 12 | T      | 11 | 1186.5790       | 593.7931        |
|         | 1431.4916       | 716.2495        | 13 | N      | 10 | 1085.5313       | 543.2693        |
|         | 1545.5346       | 773.2709        | 14 | N      | 9  | 971.4884        | 486.2478        |
|         | 1659.5775       | 830.2924        | 15 | N      | 8  | 857.4454        | 429.2264        |
|         | 1760.6252       | 880.8162        | 16 | T      | 7  | 743.4025        | 372.2049        |
|         | 1873.7092       | 937.3583        | 17 | L      | 6  | 642.3548        | 321.6810        |
|         | 1930.7307       | 965.8690        | 18 | G      | 5  | 529.2708        | 265.1390        |
|         | 2031.7784       | 1016.3928       | 19 | T      | 4  | 472.2493        | 236.6283        |
|         | 2160.8210       | 1080.9141       | 20 | E      | 3  | 371.2016        | 186.1044        |
|         | 2247.8530       | 1124.4301       | 21 | S      | 2  | 242.1590        | 121.5832        |
|         |                 |                 | 22 | K[136] | 1  | 155.1270        | 78.0671         |

# Annotated spectra from Saleem et. al. 2009

K.DAMMSAPGS<sub>167</sub>R<sub>166</sub>S/2

0.9998

1e+04

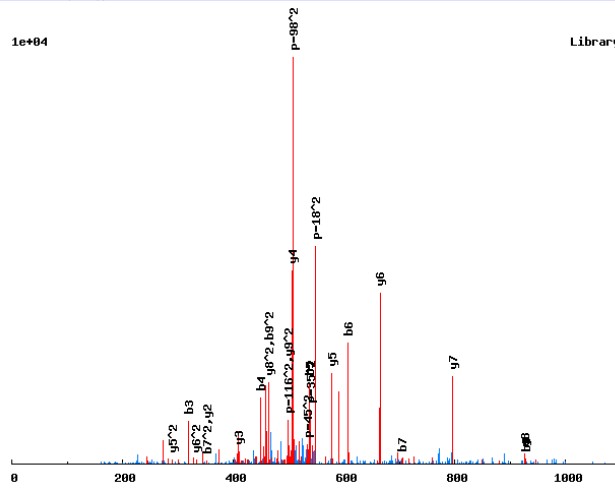

| Library | b <sup>1+</sup> | b <sup>2+</sup> | #  | AA      | #  | y <sup>1+</sup> | y <sup>2+</sup> |
|---------|-----------------|-----------------|----|---------|----|-----------------|-----------------|
|         | 116.0342        | 58.5207         | 1  | D       | 10 |                 |                 |
|         | 187.0713        | 94.0393         | 2  | A       | 9  | 997.3870        | 499.1972        |
|         | 318.1118        | 159.5596        | 3  | M       | 8  | 926.3499        | 463.6786        |
|         | 449.1523        | 225.0798        | 4  | M       | 7  | 795.3094        | 398.1584        |
|         | 536.1843        | 268.5958        | 5  | S       | 6  | 664.2689        | 332.6381        |
|         | 607.2215        | 304.1144        | 6  | A       | 5  | 577.2369        | 289.1221        |
|         | 704.2742        | 352.6407        | 7  | P       | 4  | 506.1998        | 253.6035        |
|         | 761.2957        | 381.1515        | 8  | G       | 3  | 409.1470        | 205.0772        |
|         | 928.2940        | 464.6507        | 9  | S [167] | 2  | 352.1256        | 176.5664        |
|         |                 |                 | 10 | R [166] | 1  | 185.1272        | 93.0672         |

### Annotated spectra from Saleem et. al. 2009

K.DAMMSAPGSRs<sub>167</sub>NS<sub>167</sub>R/R/3

0.9424

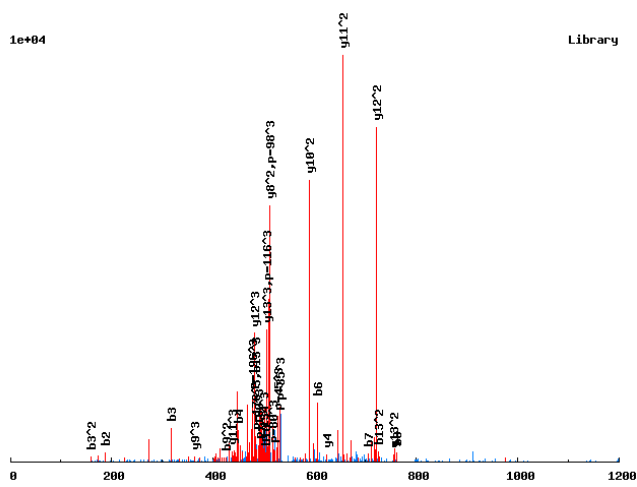

| Library | b <sup>1+</sup> | b <sup>2+</sup> | b <sup>3+</sup> | #  | AA     | #  | y <sup>1+</sup> | y <sup>2+</sup> | y <sup>3+</sup> |
|---------|-----------------|-----------------|-----------------|----|--------|----|-----------------|-----------------|-----------------|
|         | 116.0342        | 58.5207         | 39.3496         | 1  | D      | 14 |                 |                 |                 |
|         | 187.0713        | 94.0393         | 63.0286         | 2  | A      | 13 | 1511.5532       | 756.2802        | 504.5226        |
|         | 318.1118        | 159.5596        | 106.7088        | 3  | M      | 12 | 1440.5161       | 720.7617        | 480.8435        |
|         | 449.1523        | 225.0798        | 150.3890        | 4  | M      | 11 | 1309.4756       | 655.2414        | 437.1634        |
|         | 536.1843        | 268.5958        | 179.3996        | 5  | S      | 10 | 1178.4351       | 589.7212        | 393.4832        |
|         | 607.2215        | 304.1144        | 203.0787        | 6  | A      | 9  | 1091.4031       | 546.2052        | 364.4725        |
|         | 704.2742        | 352.6407        | 235.4296        | 7  | P      | 8  | 1020.3660       | 510.6866        | 340.7935        |
|         | 761.2957        | 381.1515        | 254.4367        | 8  | G      | 7  | 923.3132        | 462.1602        | 308.4426        |
|         | 848.3277        | 424.6675        | 283.4474        | 9  | S      | 6  | 866.2917        | 433.6495        | 289.4354        |
|         | 1004.4288       | 502.7180        | 335.4811        | 10 | R      | 5  | 779.2597        | 390.1335        | 260.4248        |
|         | 1171.4272       | 586.2172        | 391.1472        | 11 | S[167] | 4  | 623.1586        | 312.0829        | 208.3911        |
|         | 1285.4701       | 643.2387        | 429.1616        | 12 | N      | 3  | 456.1602        | 228.5838        | 152.7249        |
|         | 1452.4685       | 726.7379        | 484.8277        | 13 | S[167] | 2  | 342.1173        | 171.5623        | 114.7106        |
|         |                 |                 |                 | 14 | R      | 1  | 175.1190        | 88.0631         | 59.0445         |

# Annotated spectra from Saleem et. al. 2009

K.DAMMS<sub>167</sub>APGS<sub>167</sub>RSNS<sub>167</sub>R.R/3

0.9166

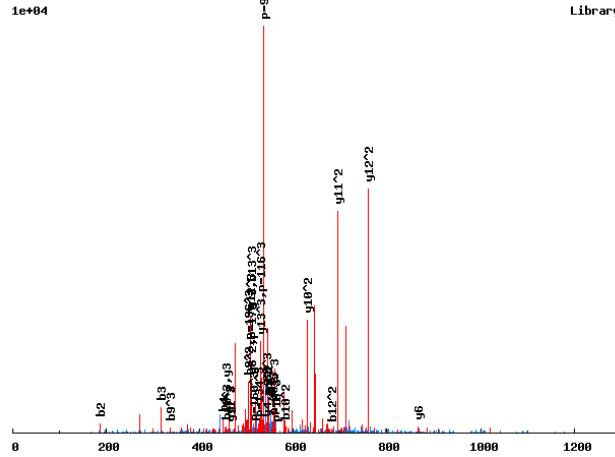

| Library | b <sup>1+</sup> | b <sup>2+</sup> | b <sup>3+</sup> | #  | AA     | #  | y <sup>1+</sup> | y <sup>2+</sup> | y <sup>3+</sup> |
|---------|-----------------|-----------------|-----------------|----|--------|----|-----------------|-----------------|-----------------|
|         | 116.0342        | 58.5207         | 39.3496         | 1  | D      | 14 |                 |                 |                 |
|         | <b>187.0713</b> | 94.0393         | 63.0286         | 2  | A      | 13 | 1591.5195       | 796.2634        | <b>531.1780</b> |
|         | <b>318.1118</b> | 159.5596        | 106.7088        | 3  | M      | 12 | 1520.4824       | <b>760.7448</b> | <b>507.4990</b> |
|         | <b>449.1523</b> | 225.0798        | 150.3890        | 4  | M      | 11 | 1389.4419       | <b>695.2246</b> | <b>463.8188</b> |
|         | 616.1507        | 308.5790        | 206.0551        | 5  | S[167] | 10 | 1258.4014       | <b>629.7044</b> | 420.1387        |
|         | 687.1878        | 344.0975        | 229.7341        | 6  | A      | 9  | 1091.4031       | <b>546.2052</b> | 364.4725        |
|         | 784.2405        | 392.6239        | 262.0850        | 7  | P      | 8  | 1020.3660       | <b>510.6866</b> | 340.7935        |
|         | 841.2620        | 421.1346        | 281.0922        | 8  | G      | 7  | 923.3132        | <b>462.1602</b> | 308.4426        |
|         | 1008.2604       | <b>504.6338</b> | <b>336.7583</b> | 9  | S[167] | 6  | <b>866.2917</b> | 433.6495        | 289.4354        |
|         | 1164.3615       | <b>582.6844</b> | 388.7920        | 10 | R      | 5  | 699.2934        | 350.1503        | 233.7693        |
|         | 1251.3935       | 626.2004        | 417.8027        | 11 | S      | 4  | <b>543.1923</b> | 272.0998        | 181.7356        |
|         | 1365.4364       | <b>683.2219</b> | <b>455.8170</b> | 12 | N      | 3  | <b>456.1602</b> | 228.5838        | 152.7249        |
|         | 1532.4348       | 766.7210        | <b>511.4831</b> | 13 | S[167] | 2  | 342.1173        | 171.5623        | 114.7106        |
|         |                 |                 |                 | 14 | R      | 1  | 175.1190        | 88.0631         | 59.0445         |

# Annotated spectra from Saleem et. al. 2009

K.DANIKPVVNAAVNDNQS<sub>167</sub>KVSVAT<sub>181</sub>EQTK.K/3

0.9986

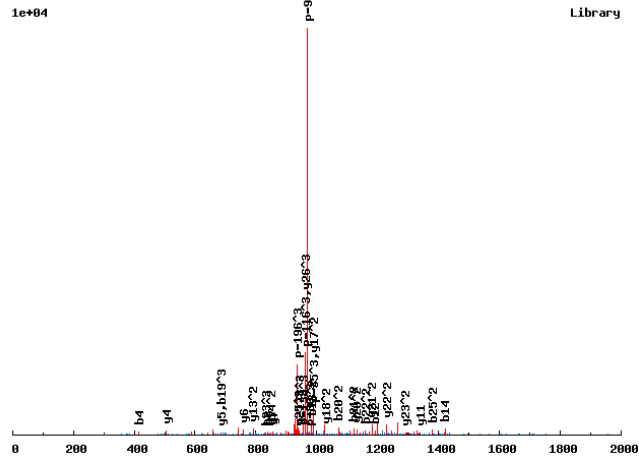

| Library | b <sup>1+</sup> | b <sup>2+</sup> | b <sup>3+</sup> | #  | AA      | #  | y <sup>1+</sup> | y <sup>2+</sup> | y <sup>3+</sup> |
|---------|-----------------|-----------------|-----------------|----|---------|----|-----------------|-----------------|-----------------|
|         | 116.0342        | 58.5207         | 39.3496         | 1  | D       | 27 |                 |                 |                 |
|         | 187.0713        | 94.0393         | 63.0286         | 2  | A       | 26 | 2885.3805       | 1443.1939       | 962.4650        |
|         | 301.1143        | 151.0608        | 101.0429        | 3  | N       | 25 | 2814.3434       | 1407.6753       | 938.7860        |
|         | 414.1983        | 207.6028        | 138.7376        | 4  | I       | 24 | 2700.3005       | 1350.6539       | 900.7717        |
|         | 542.2933        | 271.6503        | 181.4359        | 5  | K       | 23 | 2587.2164       | 1294.1119       | 863.0770        |
|         | 639.3460        | 320.1767        | 213.7869        | 6  | P       | 22 | 2459.1215       | 1230.0644       | 820.3787        |
|         | 738.4145        | 369.7109        | 246.8097        | 7  | V       | 21 | 2362.0687       | 1181.5380       | 788.0278        |
|         | 837.4829        | 419.2451        | 279.8325        | 8  | V       | 20 | 2263.0003       | 1132.0038       | 755.0050        |
|         | 951.5258        | 476.2665        | 317.8468        | 9  | N       | 19 | 2163.9319       | 1082.4696       | 721.9821        |
|         | 1022.5629       | 511.7851        | 341.5258        | 10 | A       | 18 | 2049.8890       | 1025.4481       | 683.9678        |
|         | 1093.6000       | 547.3036        | 365.2049        | 11 | A       | 17 | 1978.8518       | 989.9296        | 660.2888        |
|         | 1192.6684       | 596.8379        | 398.2277        | 12 | V       | 16 | 1907.8147       | 954.4110        | 636.6098        |
|         | 1306.7114       | 653.8593        | 436.2420        | 13 | N       | 15 | 1808.7463       | 904.8768        | 603.5870        |
|         | 1421.7383       | 711.3728        | 474.5843        | 14 | D       | 14 | 1694.7034       | 847.8553        | 565.5727        |
|         | 1535.7812       | 768.3943        | 512.5986        | 15 | N       | 13 | 1579.6765       | 790.3419        | 527.2303        |
|         | 1663.8398       | 832.4235        | 555.2848        | 16 | Q       | 12 | 1465.6335       | 733.3204        | 489.2160        |
|         | 1830.8382       | 915.9227        | 610.9509        | 17 | S [167] | 11 | 1337.5749       | 669.2911        | 446.5298        |
|         | 1958.9331       | 979.9702        | 653.6492        | 18 | K       | 10 | 1170.5766       | 585.7919        | 390.8637        |
|         | 2058.0015       | 1029.5044       | 686.6720        | 19 | V       | 9  | 1042.4816       | 521.7445        | 348.1654        |
|         | 2145.0336       | 1073.0204       | 715.6827        | 20 | S       | 8  | 943.4132        | 472.2102        | 315.1426        |
|         | 2244.1020       | 1122.5546       | 748.7055        | 21 | V       | 7  | 856.3812        | 428.6942        | 286.1319        |
|         | 2315.1391       | 1158.0732       | 772.3845        | 22 | A       | 6  | 757.3128        | 379.1600        | 253.1091        |
|         | 2496.1531       | 1248.5802       | 832.7226        | 23 | T [181] | 5  | 686.2757        | 343.6415        | 229.4301        |
|         | 2625.1957       | 1313.1015       | 875.7367        | 24 | E       | 4  | 505.2617        | 253.1345        | 169.0921        |
|         | 2753.2543       | 1377.1308       | 918.4229        | 25 | Q       | 3  | 376.2191        | 188.6132        | 126.0779        |
|         | 2854.3019       | 1427.6546       | 952.1055        | 26 | T       | 2  | 248.1605        | 124.5839        | 83.3917         |
|         |                 |                 |                 | 27 | K       | 1  | 147.1128        | 74.0600         | 49.7091         |



# Annotated spectra from Saleem et. al. 2009

K.DANIKPVVNAAVNDNQS<sub>167</sub>KVS<sub>167</sub>VAT<sub>181</sub>EQTKK.T/4

0.8684

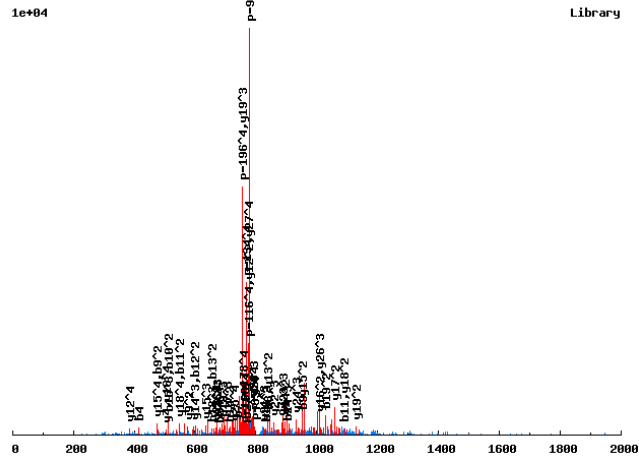

| Library | b <sup>1+</sup> | b <sup>2+</sup> | b <sup>3+</sup> | b <sup>4+</sup> | #  | AA     | #  | y <sup>1+</sup> | y <sup>2+</sup> | y <sup>3+</sup> | y <sup>4+</sup> |
|---------|-----------------|-----------------|-----------------|-----------------|----|--------|----|-----------------|-----------------|-----------------|-----------------|
|         | 116.0342        | 58.5207         | 39.3496         | 29.7640         | 1  | D      | 28 |                 |                 |                 |                 |
|         | 187.0713        | 94.0393         | 63.0286         | 47.5233         | 2  | A      | 27 | 3093.4418       | 1547.2245       | 1031.8188       | 774.1159        |
|         | 301.1143        | 151.0608        | 101.0429        | 76.0340         | 3  | N      | 26 | 3022.4047       | 1511.7060       | 1008.1398       | 756.3566        |
|         | 414.1983        | 207.6028        | 138.7376        | 104.3050        | 4  | I      | 25 | 2908.3618       | 1454.6845       | 970.1254        | 727.8459        |
|         | 542.2933        | 271.6503        | 181.4359        | 136.3288        | 5  | K      | 24 | 2795.2777       | 1398.1425       | 932.4308        | 699.5749        |
|         | 639.3460        | 320.1767        | 213.7869        | 160.5920        | 6  | P      | 23 | 2667.1828       | 1334.0950       | 889.7324        | 667.5511        |
|         | 738.4145        | 369.7109        | 246.8097        | 185.3591        | 7  | V      | 22 | 2570.1300       | 1285.5686       | 857.3815        | 643.2880        |
|         | 837.4829        | 419.2451        | 279.8325        | 210.1262        | 8  | V      | 21 | 2471.0616       | 1236.0344       | 824.3587        | 618.5209        |
|         | 951.5258        | 476.2665        | 317.8468        | 238.6369        | 9  | N      | 20 | 2371.9932       | 1186.5002       | 791.3359        | 593.7538        |
|         | 1022.5629       | 511.7851        | 341.5258        | 256.3962        | 10 | A      | 19 | 2257.9502       | 1129.4788       | 753.3216        | 565.2430        |
|         | 1093.6000       | 547.3036        | 365.2049        | 274.1555        | 11 | A      | 18 | 2186.9131       | 1093.9602       | 729.6426        | 547.4837        |
|         | 1192.6684       | 596.8379        | 398.2277        | 298.9226        | 12 | V      | 17 | 2115.8760       | 1058.4417       | 705.9635        | 529.7245        |
|         | 1306.7114       | 653.8593        | 436.2420        | 327.4333        | 13 | N      | 16 | 2016.8076       | 1008.9074       | 672.9407        | 504.9574        |
|         | 1421.7383       | 711.3728        | 474.5843        | 356.1900        | 14 | D      | 15 | 1902.7647       | 951.8860        | 634.9264        | 476.4466        |
|         | 1535.7812       | 768.3943        | 512.5986        | 384.7008        | 15 | N      | 14 | 1787.7377       | 894.3725        | 596.5841        | 447.6899        |
|         | 1663.8398       | 832.4235        | 555.2848        | 416.7154        | 16 | Q      | 13 | 1673.6948       | 837.3510        | 558.5698        | 419.1792        |
|         | 1830.8382       | 915.9227        | 610.9509        | 458.4650        | 17 | S[167] | 12 | 1545.6362       | 773.3218        | 515.8836        | 387.1645        |
|         | 1958.9331       | 979.9702        | 653.6492        | 490.4887        | 18 | K      | 11 | 1378.6379       | 689.8226        | 460.2175        | 345.4149        |
|         | 2058.0015       | 1029.5044       | 686.6720        | 515.2558        | 19 | V      | 10 | 1250.5429       | 625.7751        | 417.5192        | 313.3912        |
|         | 2224.9999       | 1113.0036       | 742.3382        | 557.0054        | 20 | S[167] | 9  | 1151.4745       | 576.2409        | 384.4964        | 288.6241        |
|         | 2324.0683       | 1162.5378       | 775.3610        | 581.7725        | 21 | V      | 8  | 984.4761        | 492.7417        | 328.8302        | 246.8745        |
|         | 2395.1054       | 1198.0563       | 799.0400        | 599.5318        | 22 | A      | 7  | 885.4077        | 443.2075        | 295.8074        | 222.1074        |
|         | 2576.1194       | 1288.5634       | 859.3780        | 644.7853        | 23 | T[181] | 6  | 814.3706        | 407.6890        | 272.1284        | 204.3481        |
|         | 2705.1620       | 1353.0846       | 902.3922        | 677.0460        | 24 | E      | 5  | 633.3566        | 317.1819        | 211.7904        | 159.0946        |
|         | 2833.2206       | 1417.1139       | 945.0784        | 709.0606        | 25 | Q      | 4  | 504.3140        | 252.6607        | 168.7762        | 126.8340        |
|         | 2934.2683       | 1467.6378       | 978.7609        | 734.3225        | 26 | T      | 3  | 376.2554        | 188.6314        | 126.0900        | 94.8193         |
|         | 3062.3632       | 1531.6853       | 1021.4593       | 766.3463        | 27 | K      | 2  | 275.2078        | 138.1075        | 92.4074         | 69.5574         |
|         |                 |                 |                 |                 | 28 | K      | 1  | 147.1128        | 74.0600         | 49.7091         | 37.5337         |

# Annotated spectra from Saleem et. al. 2009

K.DASASS<sub>167</sub>TS<sub>167</sub>TFDAR.A/2

0.9967

1e+04

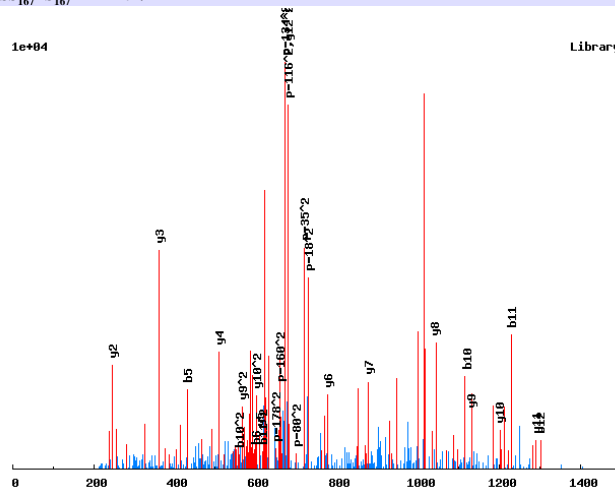

| Library | b <sup>1+</sup> | b <sup>2+</sup> | #  | AA     | #  | y <sup>1+</sup> | y <sup>2+</sup> |
|---------|-----------------|-----------------|----|--------|----|-----------------|-----------------|
|         | 116.0342        | 58.5207         | 1  | D      | 13 |                 |                 |
|         | 187.0713        | 94.0393         | 2  | A      | 12 | 1360.4818       | 680.7445        |
|         | 274.1034        | 137.5553        | 3  | S      | 11 | 1289.4447       | 645.2260        |
|         | 345.1405        | 173.0739        | 4  | A      | 10 | 1202.4126       | 601.7100        |
|         | 432.1725        | 216.5899        | 5  | S      | 9  | 1131.3755       | 566.1914        |
|         | 599.1709        | 300.0891        | 6  | S[167] | 8  | 1044.3435       | 522.6754        |
|         | 700.2185        | 350.6129        | 7  | T      | 7  | 877.3451        | 439.1762        |
|         | 867.2169        | 434.1121        | 8  | S[167] | 6  | 776.2975        | 388.6524        |
|         | 968.2646        | 484.6359        | 9  | T      | 5  | 609.2991        | 305.1532        |
|         | 1115.3330       | 558.1701        | 10 | F      | 4  | 508.2514        | 254.6293        |
|         | 1230.3599       | 615.6836        | 11 | D      | 3  | 361.1830        | 181.0951        |
|         | 1301.3970       | 651.2022        | 12 | A      | 2  | 246.1561        | 123.5817        |
|         |                 |                 | 13 | R      | 1  | 175.1190        | 88.0631         |

# Annotated spectra from Saleem et. al. 2009

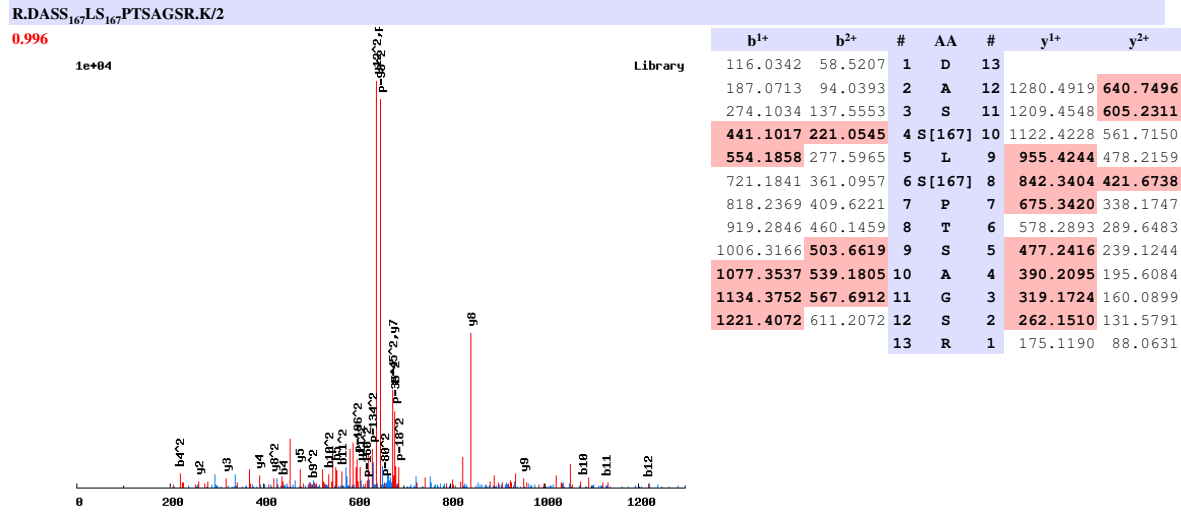

# Annotated spectra from Saleem et. al. 2009

K.DDDIRDSY<sub>243</sub>T<sub>181</sub>SVAELNR.E/2

0.8687

1e+04

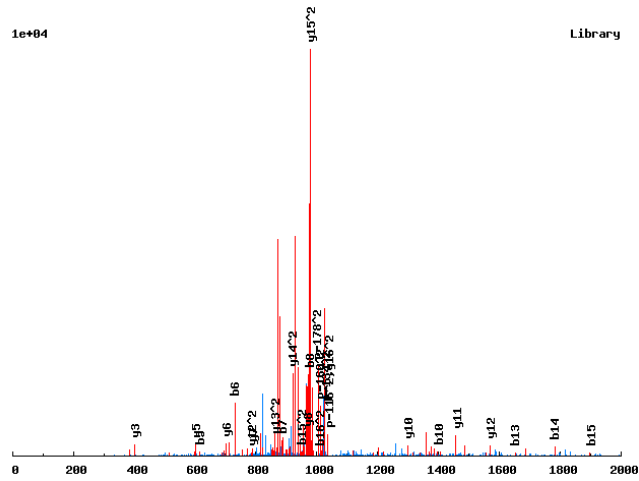

| Library | b <sup>1+</sup> | b <sup>2+</sup> | #  | AA     | #  | y <sup>1+</sup> | y <sup>2+</sup> |
|---------|-----------------|-----------------|----|--------|----|-----------------|-----------------|
|         | 116.0342        | 58.5207         | 1  | D      | 17 |                 |                 |
|         | 231.0612        | 116.0342        | 2  | D      | 16 | 2069.8689       | 1035.4381       |
|         | 346.0881        | 173.5477        | 3  | D      | 15 | 1954.8419       | 977.9246        |
|         | 459.1722        | 230.0897        | 4  | I      | 14 | 1839.8150       | 920.4111        |
|         | 615.2733        | 308.1403        | 5  | R      | 13 | 1726.7309       | 863.8691        |
|         | 730.3002        | 365.6537        | 6  | D      | 12 | 1570.6298       | 785.8186        |
|         | 886.4013        | 443.7043        | 7  | R      | 11 | 1455.6029       | 728.3051        |
|         | 973.4334        | 487.2203        | 8  | S      | 10 | 1299.5018       | 650.2545        |
|         | 1216.4630       | 608.7351        | 9  | Y[243] | 9  | 1212.4698       | 606.7385        |
|         | 1397.4770       | 699.2422        | 10 | T[181] | 8  | 969.4401        | 485.2237        |
|         | 1484.5091       | 742.7582        | 11 | S      | 7  | 788.4261        | 394.7167        |
|         | 1583.5775       | 792.2924        | 12 | V      | 6  | 701.3940        | 351.2007        |
|         | 1654.6146       | 827.8109        | 13 | A      | 5  | 602.3256        | 301.6665        |
|         | 1783.6572       | 892.3322        | 14 | E      | 4  | 531.2885        | 266.1479        |
|         | 1896.7412       | 948.8743        | 15 | L      | 3  | 402.2459        | 201.6266        |
|         | 2010.7842       | 1005.8957       | 16 | N      | 2  | 289.1619        | 145.0846        |
|         |                 |                 | 17 | R      | 1  | 175.1190        | 88.0631         |

# Annotated spectra from Saleem et. al. 2009

R.DDS<sub>167</sub>INS<sub>167</sub>LGNNKQPLR.K/2

0.9641

1e+04

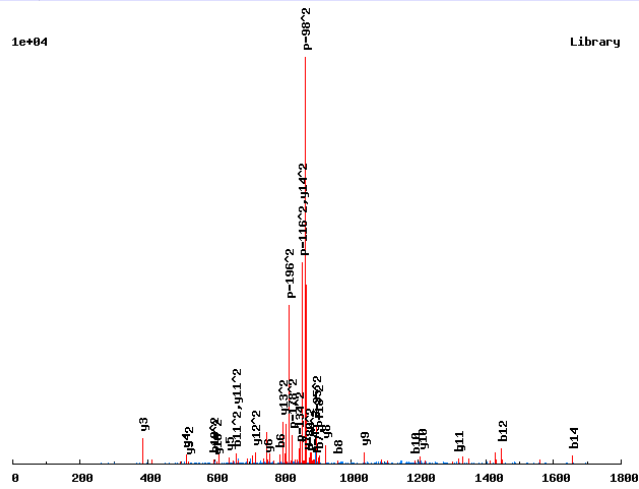

| Library | b <sup>1+</sup> | b <sup>2+</sup> | #  | AA     | #  | y <sup>1+</sup> | y <sup>2+</sup> |
|---------|-----------------|-----------------|----|--------|----|-----------------|-----------------|
|         | 116.0342        | 58.5207         | 1  | D      | 15 |                 |                 |
|         | 231.0612        | 116.0342        | 2  | D      | 14 | 1715.7513       | 858.3793        |
|         | 398.0595        | 199.5334        | 3  | S[167] | 13 | 1600.7244       | 800.8658        |
|         | 511.1436        | 256.0754        | 4  | I      | 12 | 1433.7260       | 717.3667        |
|         | 625.1865        | 313.0969        | 5  | N      | 11 | 1320.6420       | 660.8246        |
|         | 792.1849        | 396.5961        | 6  | S[167] | 10 | 1206.5991       | 603.8032        |
|         | 905.2689        | 453.1381        | 7  | L      | 9  | 1039.6007       | 520.3040        |
|         | 962.2904        | 481.6488        | 8  | G      | 8  | 926.5166        | 463.7620        |
|         | 1076.3333       | 538.6703        | 9  | N      | 7  | 869.4952        | 435.2512        |
|         | 1190.3763       | 595.6918        | 10 | N      | 6  | 755.4522        | 378.2298        |
|         | 1318.4712       | 659.7392        | 11 | K      | 5  | 641.4093        | 321.2083        |
|         | 1446.5298       | 723.7685        | 12 | Q      | 4  | 513.3144        | 257.1608        |
|         | 1543.5826       | 772.2949        | 13 | P      | 3  | 385.2558        | 193.1315        |
|         | 1656.6666       | 828.8369        | 14 | L      | 2  | 288.2030        | 144.6051        |
|         |                 |                 | 15 | R      | 1  | 175.1190        | 88.0631         |

# Annotated spectra from Saleem et. al. 2009

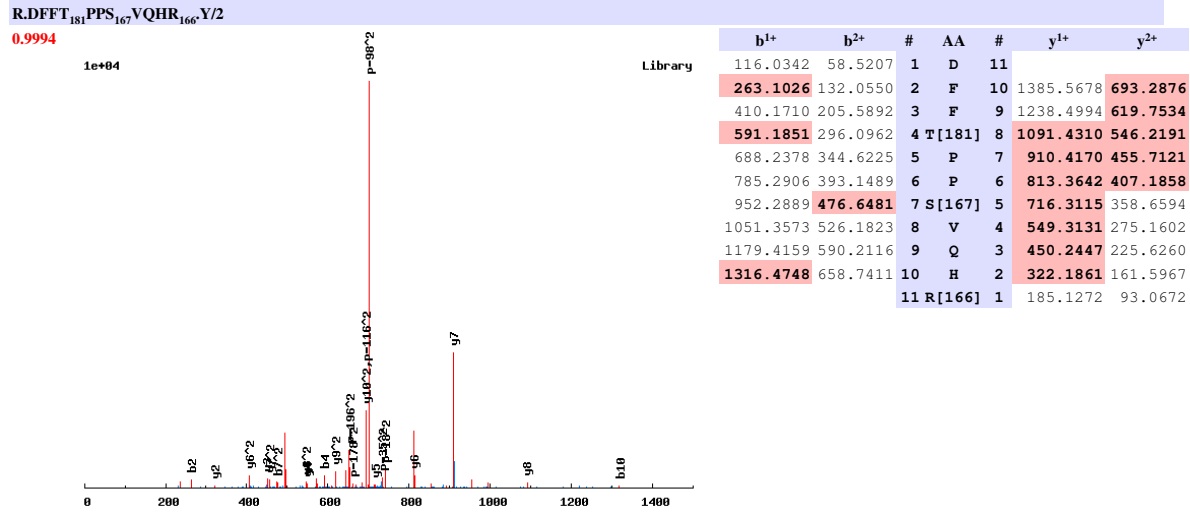

# Annotated spectra from Saleem et. al. 2009

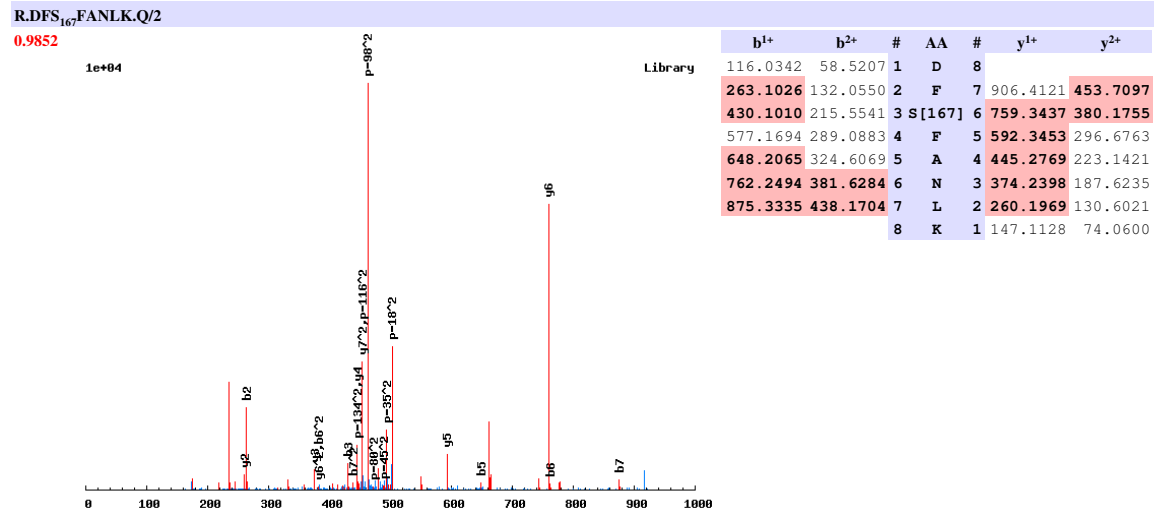

# Annotated spectra from Saleem et. al. 2009

K.DFS<sub>167</sub>PNFTGIDK<sub>136</sub>L/2

0.9977

1e+04

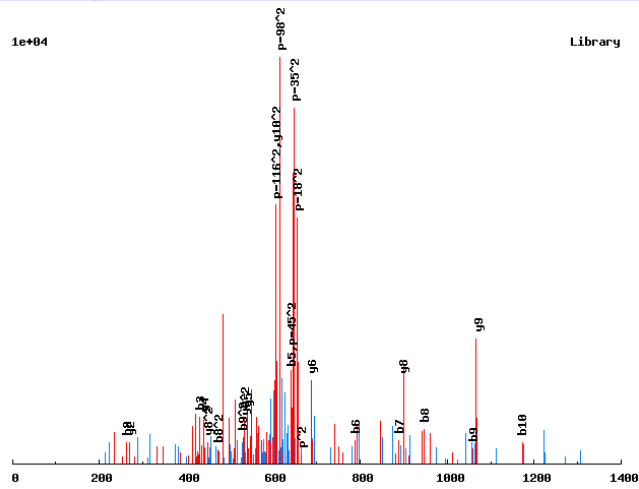

| Library | b <sup>1+</sup> | b <sup>2+</sup> | #  | AA     | #  | y <sup>1+</sup> | y <sup>2+</sup> |
|---------|-----------------|-----------------|----|--------|----|-----------------|-----------------|
|         | 116.0342        | 58.5207         | 1  | D      | 11 |                 |                 |
|         | 263.1026        | 132.0550        | 2  | F      | 10 | 1213.5380       | 607.2726        |
|         | 430.1010        | 215.5541        | 3  | S[167] | 9  | 1066.4696       | 533.7384        |
|         | 527.1538        | 264.0805        | 4  | P      | 8  | 899.4712        | 450.2393        |
|         | 641.1967        | 321.1020        | 5  | N      | 7  | 802.4185        | 401.7129        |
|         | 788.2651        | 394.6362        | 6  | F      | 6  | 688.3755        | 344.6914        |
|         | 889.3128        | 445.1600        | 7  | T      | 5  | 541.3071        | 271.1572        |
|         | 946.3342        | 473.6708        | 8  | G      | 4  | 440.2595        | 220.6334        |
|         | 1059.4183       | 530.2128        | 9  | I      | 3  | 383.2380        | 192.1226        |
|         | 1174.4452       | 587.7263        | 10 | D      | 2  | 270.1539        | 135.5806        |
|         |                 |                 | 11 | K[136] | 1  | 155.1270        | 78.0671         |



# Annotated spectra from Saleem et. al. 2009

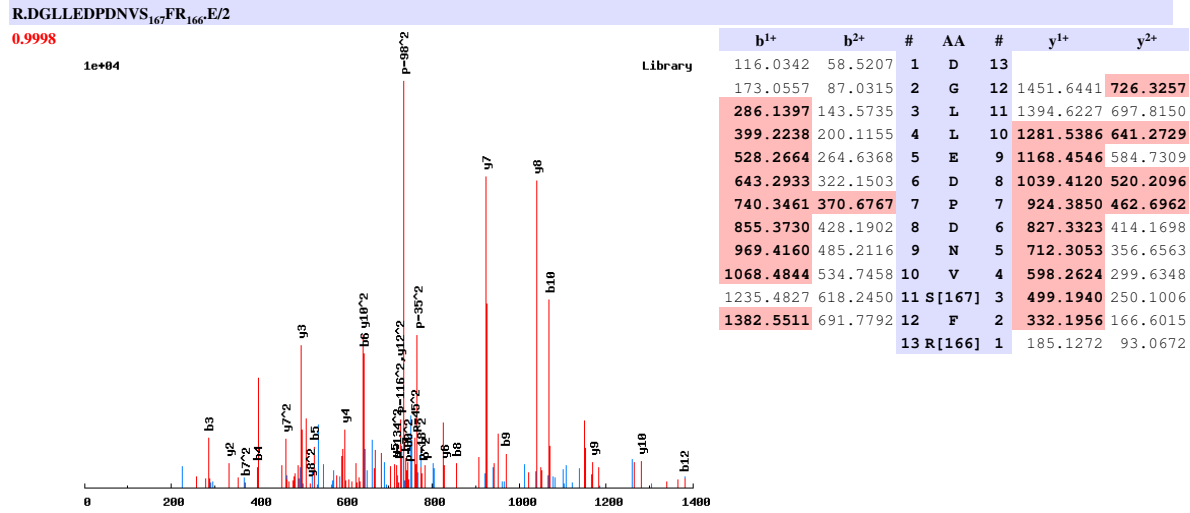

# Annotated spectra from Saleem et. al. 2009

K.DGNLAS<sub>167</sub>SNS<sub>167</sub>AHFPPVANQNVK<sub>136</sub>/S/3

0.9998

1e+04

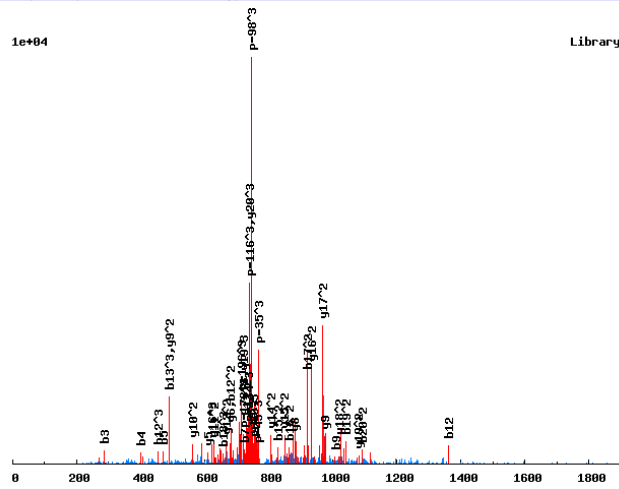

| Library | b <sup>1+</sup>  | b <sup>2+</sup>  | b <sup>3+</sup> | #  | AA     | #  | y <sup>1+</sup> | y <sup>2+</sup>  | y <sup>3+</sup> |
|---------|------------------|------------------|-----------------|----|--------|----|-----------------|------------------|-----------------|
|         | 116.0342         | 58.5207          | 39.3496         | 1  | D      | 21 |                 |                  |                 |
|         | 173.0557         | 87.0315          | 58.3567         | 2  | G      | 20 | 2219.9726       | 1110.4899        | <b>740.6624</b> |
|         | <b>287.0986</b>  | 144.0529         | 96.3711         | 3  | N      | 19 | 2162.9511       | <b>1081.9792</b> | <b>721.6552</b> |
|         | <b>400.1827</b>  | 200.5950         | 134.0657        | 4  | L      | 18 | 2048.9082       | <b>1024.9577</b> | 683.6409        |
|         | <b>471.2198</b>  | 236.1135         | 157.7448        | 5  | A      | 17 | 1935.8241       | <b>968.4157</b>  | 645.9462        |
|         | 638.2181         | 319.6127         | 213.4109        | 6  | S[167] | 16 | 1864.7870       | <b>932.8971</b>  | <b>622.2672</b> |
|         | <b>725.2502</b>  | 363.1287         | 242.4216        | 7  | S      | 15 | 1697.7886       | <b>849.3980</b>  | 566.6011        |
|         | 839.2931         | 420.1502         | 280.4359        | 8  | N      | 14 | 1610.7566       | <b>805.8819</b>  | 537.5904        |
|         | <b>1006.2915</b> | 503.6494         | 336.1020        | 9  | S[167] | 13 | 1496.7137       | <b>748.8605</b>  | 499.5761        |
|         | 1077.3286        | 539.1679         | 359.7810        | 10 | A      | 12 | 1329.7153       | <b>665.3613</b>  | 443.9100        |
|         | 1214.3875        | 607.6974         | 405.4673        | 11 | H      | 11 | 1258.6782       | <b>629.8427</b>  | 420.2309        |
|         | <b>1361.4559</b> | <b>681.2316</b>  | <b>454.4902</b> | 12 | F      | 10 | 1121.6193       | <b>561.3133</b>  | 374.5446        |
|         | 1458.5087        | <b>729.7580</b>  | <b>486.8411</b> | 13 | P      | 9  | <b>974.5509</b> | <b>487.7791</b>  | 325.5218        |
|         | 1555.5614        | 778.2843         | 519.1920        | 14 | P      | 8  | <b>877.4981</b> | 439.2527         | 293.1709        |
|         | 1654.6298        | <b>827.8186</b>  | 552.2148        | 15 | V      | 7  | 780.4454        | 390.7263         | 260.8200        |
|         | 1725.6669        | <b>863.3371</b>  | 575.8938        | 16 | A      | 6  | <b>681.3770</b> | 341.1921         | 227.7972        |
|         | 1839.7099        | <b>920.3586</b>  | 613.9081        | 17 | N      | 5  | <b>610.3398</b> | 305.6736         | 204.1181        |
|         | 1967.7684        | 984.3879         | <b>656.5943</b> | 18 | Q      | 4  | 496.2969        | 248.6521         | 166.1038        |
|         | 2081.8114        | <b>1041.4093</b> | 694.6086        | 19 | N      | 3  | 368.2383        | 184.6228         | 123.4176        |
|         | 2180.8798        | <b>1090.9435</b> | 727.6314        | 20 | V      | 2  | 254.1954        | 127.6013         | 85.4033         |
|         |                  |                  |                 | 21 | K[136] | 1  | 155.1270        | 78.0671          | 52.3805         |

# Annotated spectra from Saleem et. al. 2009

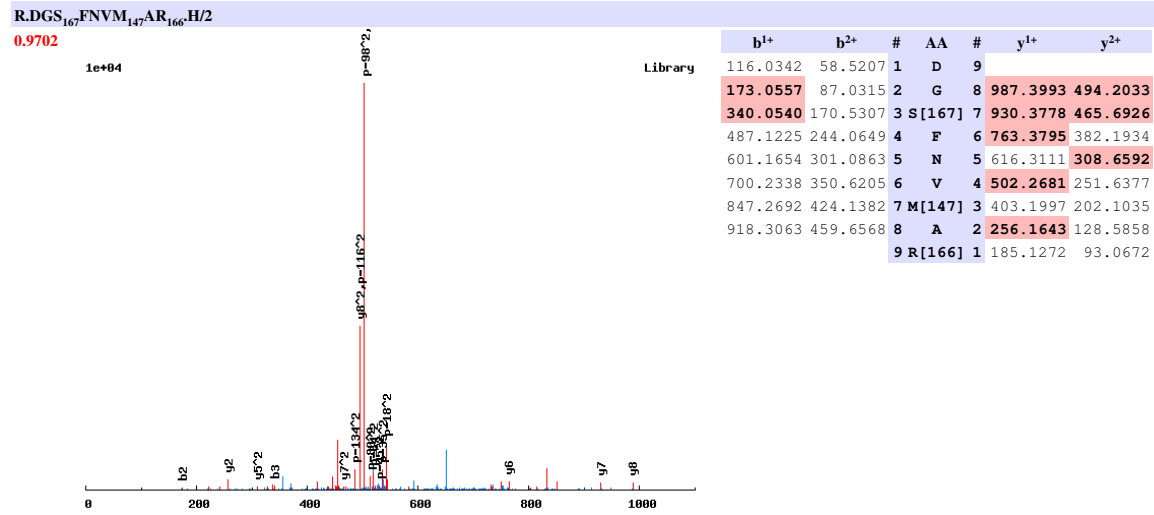

# Annotated spectra from Saleem et. al. 2009

K.DGS<sub>167</sub>QT<sub>181</sub>PTVDSVTK<sub>136</sub>D/2

0.9996

1e+04

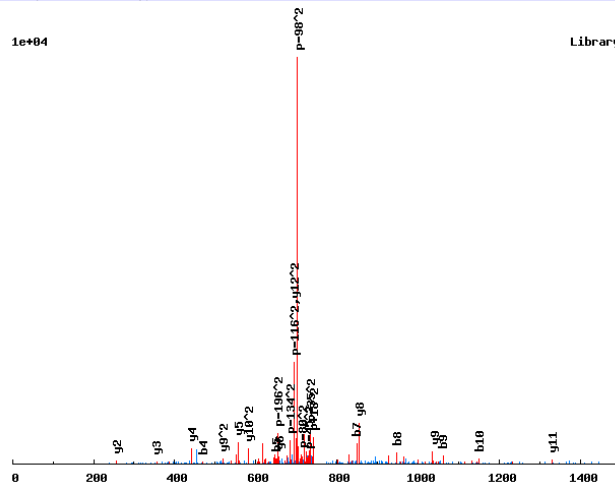

| Library | b <sup>1+</sup> | b <sup>2+</sup> | #  | AA     | #  | y <sup>1+</sup> | y <sup>2+</sup> |
|---------|-----------------|-----------------|----|--------|----|-----------------|-----------------|
|         | 116.0342        | 58.5207         | 1  | D      | 13 |                 |                 |
|         | 173.0557        | 87.0315         | 2  | G      | 12 | 1387.5633       | 694.2853        |
|         | 340.0540        | 170.5307        | 3  | S[167] | 11 | 1330.5419       | 665.7746        |
|         | 468.1126        | 234.5600        | 4  | Q      | 10 | 1163.5435       | 582.2754        |
|         | 649.1266        | 325.0670        | 5  | T[181] | 9  | 1035.4849       | 518.2461        |
|         | 746.1794        | 373.5933        | 6  | P      | 8  | 854.4709        | 427.7391        |
|         | 847.2271        | 424.1172        | 7  | T      | 7  | 757.4181        | 379.2127        |
|         | 946.2955        | 473.6514        | 8  | V      | 6  | 656.3705        | 328.6889        |
|         | 1061.3224       | 531.1649        | 9  | D      | 5  | 557.3021        | 279.1547        |
|         | 1148.3545       | 574.6809        | 10 | S      | 4  | 442.2751        | 221.6412        |
|         | 1247.4229       | 624.2151        | 11 | V      | 3  | 355.2431        | 178.1252        |
|         | 1348.4705       | 674.7389        | 12 | T      | 2  | 256.1747        | 128.5910        |
|         |                 |                 | 13 | K[136] | 1  | 155.1270        | 78.0671         |

# Annotated spectra from Saleem et. al. 2009

K.DGYVS<sub>167</sub>GSEISVR.T/2

0.9728

1e+04

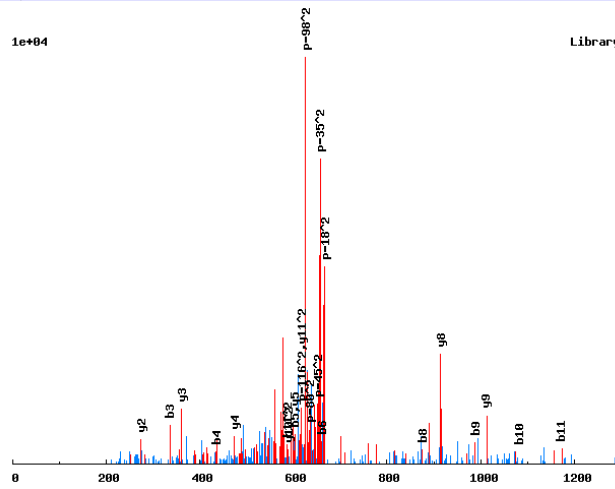

| Library | b <sup>1+</sup> | b <sup>2+</sup> | #  | AA     | #  | y <sup>1+</sup> | y <sup>2+</sup> |
|---------|-----------------|-----------------|----|--------|----|-----------------|-----------------|
|         | 116.0342        | 58.5207         | 1  | D      | 12 |                 |                 |
|         | 173.0557        | 87.0315         | 2  | G      | 11 | 1233.5511       | 617.2792        |
|         | 336.1190        | 168.5631        | 3  | Y      | 10 | 1176.5296       | 588.7685        |
|         | 435.1874        | 218.0973        | 4  | V      | 9  | 1013.4663       | 507.2368        |
|         | 602.1858        | 301.5965        | 5  | S[167] | 8  | 914.3979        | 457.7026        |
|         | 659.2072        | 330.1073        | 6  | G      | 7  | 747.3995        | 374.2034        |
|         | 746.2393        | 373.6233        | 7  | S      | 6  | 690.3781        | 345.6927        |
|         | 875.2819        | 438.1446        | 8  | E      | 5  | 603.3460        | 302.1767        |
|         | 988.3659        | 494.6866        | 9  | I      | 4  | 474.3034        | 237.6554        |
|         | 1075.3980       | 538.2026        | 10 | S      | 3  | 361.2194        | 181.1133        |
|         | 1174.4664       | 587.7368        | 11 | V      | 2  | 274.1874        | 137.5973        |
|         |                 |                 | 12 | R      | 1  | 175.1190        | 88.0631         |

# Annotated spectra from Saleem et. al. 2009

K.DHDDNS<sub>167</sub>DYES<sub>167</sub>NDT<sub>181</sub>GVNDELK<sub>136</sub>Q/3

0.715

1e+04

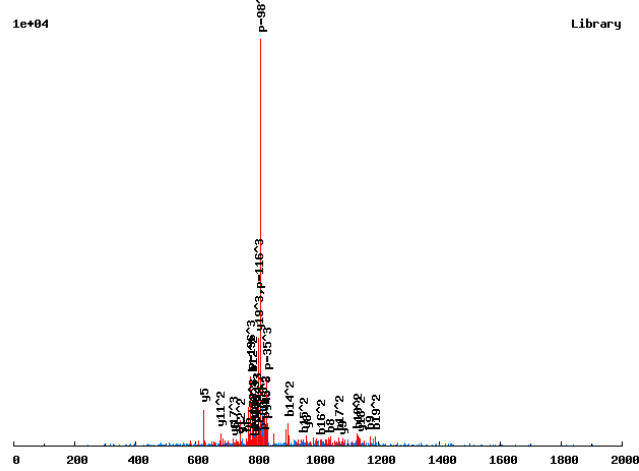

| Library | b <sup>1+</sup> | b <sup>2+</sup> | b <sup>3+</sup> | #  | AA     | #  | y <sup>1+</sup> | y <sup>2+</sup> | y <sup>3+</sup> |
|---------|-----------------|-----------------|-----------------|----|--------|----|-----------------|-----------------|-----------------|
|         | 116.0342        | 58.5207         | 39.3496         | 1  | D      | 20 |                 |                 |                 |
|         | 253.0931        | 127.0502        | 85.0359         | 2  | H      | 19 | 2414.7826       | 1207.8949       | 805.5990        |
|         | 368.1201        | 184.5637        | 123.3782        | 3  | D      | 18 | 2277.7237       | 1139.3655       | 759.9127        |
|         | 483.1470        | 242.0771        | 161.7205        | 4  | D      | 17 | 2162.6967       | 1081.8520       | 721.5704        |
|         | 597.1899        | 299.0986        | 199.7348        | 5  | N      | 16 | 2047.6698       | 1024.3385       | 683.2281        |
|         | 764.1883        | 382.5978        | 255.4010        | 6  | S[167] | 15 | 1933.6269       | 967.3171        | 645.2138        |
|         | 879.2152        | 440.1113        | 293.7433        | 7  | D      | 14 | 1766.6285       | 883.8179        | 589.5477        |
|         | 1042.2786       | 521.6429        | 348.0977        | 8  | Y      | 13 | 1651.6016       | 826.3044        | 551.2054        |
|         | 1171.3212       | 586.1642        | 391.1119        | 9  | E      | 12 | 1488.5382       | 744.7728        | 496.8509        |
|         | 1338.3195       | 669.6634        | 446.7780        | 10 | S[167] | 11 | 1359.4956       | 680.2515        | 453.8367        |
|         | 1452.3625       | 726.6849        | 484.7923        | 11 | N      | 10 | 1192.4973       | 596.7523        | 398.1706        |
|         | 1567.3894       | 784.1983        | 523.1347        | 12 | D      | 9  | 1078.4543       | 539.7308        | 360.1563        |
|         | 1748.4034       | 874.7053        | 583.4727        | 13 | T[181] | 8  | 963.4274        | 482.2173        | 321.8140        |
|         | 1805.4249       | 903.2161        | 602.4798        | 14 | G      | 7  | 782.4134        | 391.7103        | 261.4760        |
|         | 1904.4933       | 952.7503        | 635.5026        | 15 | V      | 6  | 725.3919        | 363.1996        | 242.4688        |
|         | 2018.5362       | 1009.7717       | 673.5169        | 16 | N      | 5  | 626.3235        | 313.6654        | 209.4460        |
|         | 2133.5631       | 1067.2852       | 711.8592        | 17 | D      | 4  | 512.2806        | 256.6439        | 171.4317        |
|         | 2262.6057       | 1131.8065       | 754.8734        | 18 | E      | 3  | 397.2536        | 199.1305        | 133.0894        |
|         | 2375.6898       | 1188.3485       | 792.5681        | 19 | L      | 2  | 268.2111        | 134.6092        | 90.0752         |
|         |                 |                 |                 | 20 | K[136] | 1  | 155.1270        | 78.0671         | 52.3805         |

# Annotated spectra from Saleem et. al. 2009

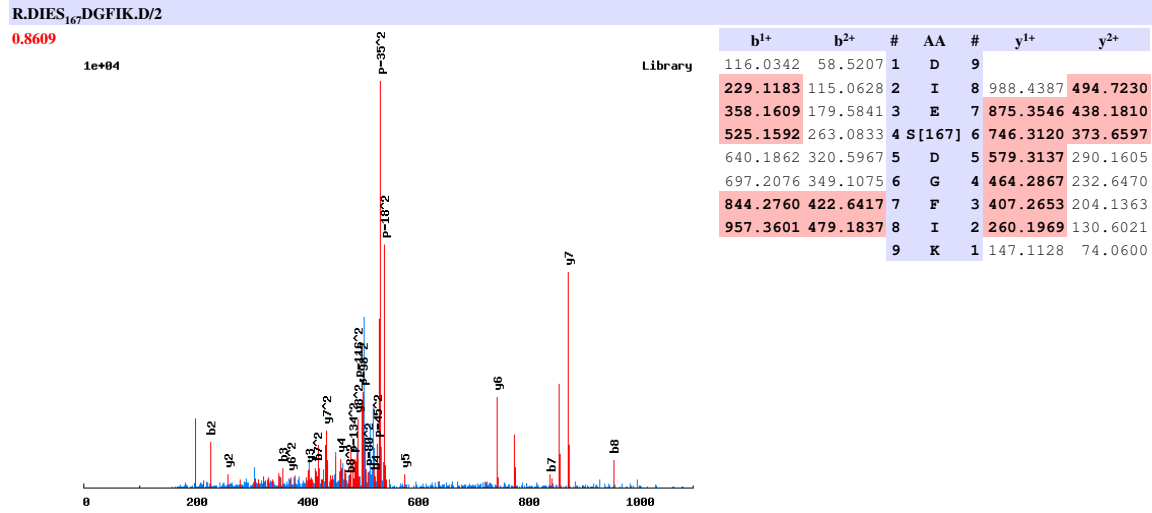

# Annotated spectra from Saleem et. al. 2009

R.DIHNIGKTS<sub>167</sub>GGGS<sub>167</sub>R.T/2

0.9828

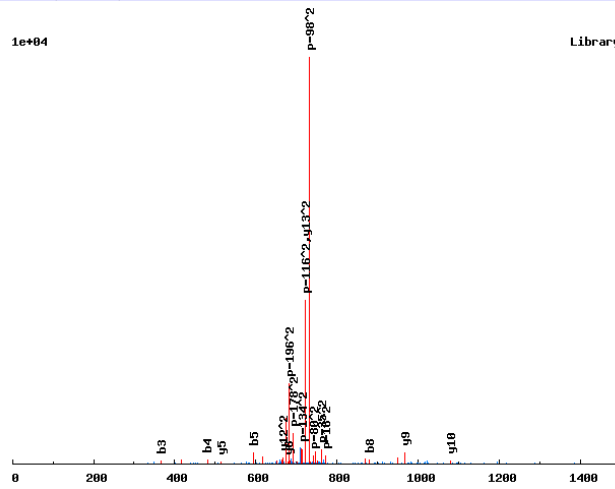

| Library | b <sup>1+</sup> | b <sup>2+</sup> | #  | AA     | #  | y <sup>1+</sup> | y <sup>2+</sup> |
|---------|-----------------|-----------------|----|--------|----|-----------------|-----------------|
|         | 116.0342        | 58.5207         | 1  | D      | 14 |                 |                 |
|         | 229.1183        | 115.0628        | 2  | I      | 13 | 1443.6141       | 722.3107        |
|         | 366.1772        | 183.5922        | 3  | H      | 12 | 1330.5301       | 665.7687        |
|         | 480.2201        | 240.6137        | 4  | N      | 11 | 1193.4711       | 597.2392        |
|         | 593.3042        | 297.1557        | 5  | I      | 10 | 1079.4282       | 540.2177        |
|         | 650.3256        | 325.6665        | 6  | G      | 9  | 966.3442        | 483.6757        |
|         | 778.4206        | 389.7139        | 7  | K      | 8  | 909.3227        | 455.1650        |
|         | 879.4683        | 440.2378        | 8  | T      | 7  | 781.2277        | 391.1175        |
|         | 1046.4666       | 523.7370        | 9  | S[167] | 6  | 680.1801        | 340.5937        |
|         | 1103.4881       | 552.2477        | 10 | G      | 5  | 513.1817        | 257.0945        |
|         | 1160.5096       | 580.7584        | 11 | G      | 4  | 456.1602        | 228.5838        |
|         | 1217.5310       | 609.2692        | 12 | G      | 3  | 399.1388        | 200.0730        |
|         | 1384.5294       | 692.7683        | 13 | S[167] | 2  | 342.1173        | 171.5623        |
|         |                 |                 | 14 | R      | 1  | 175.1190        | 88.0631         |



# Annotated spectra from Saleem et. al. 2009

K.DKDSNS<sub>167</sub>S<sub>167</sub>ITISTSTPSEMR.K/3

0.6272

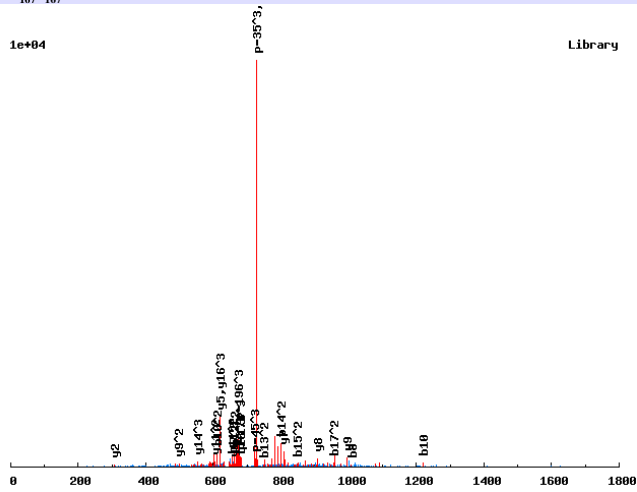

| Library | b <sup>1+</sup> | b <sup>2+</sup> | b <sup>3+</sup> | #  | AA     | #  | y <sup>1+</sup> | y <sup>2+</sup> | y <sup>3+</sup> |
|---------|-----------------|-----------------|-----------------|----|--------|----|-----------------|-----------------|-----------------|
|         | 116.0342        | 58.5207         | 39.3496         | 1  | D      | 19 |                 |                 |                 |
|         | 244.1292        | 122.5682        | 82.0479         | 2  | K      | 18 | 2100.8556       | 1050.9315       | 700.9567        |
|         | 359.1561        | 180.0817        | 120.3902        | 3  | D      | 17 | 1972.7607       | 986.8840        | 658.2584        |
|         | 446.1881        | 223.5977        | 149.4009        | 4  | S      | 16 | 1857.7337       | 929.3705        | 619.9161        |
|         | 560.2311        | 280.6192        | 187.4152        | 5  | N      | 15 | 1770.7017       | 885.8545        | 590.9054        |
|         | 727.2294        | 364.1184        | 243.0813        | 6  | S[167] | 14 | 1656.6588       | 828.8330        | 552.8911        |
|         | 894.2278        | 447.6175        | 298.7475        | 7  | S[167] | 13 | 1489.6604       | 745.3338        | 497.2250        |
|         | 1007.3119       | 504.1596        | 336.4421        | 8  | I      | 12 | 1322.6620       | 661.8347        | 441.5589        |
|         | 1108.3595       | 554.6834        | 370.1247        | 9  | T      | 11 | 1209.5780       | 605.2926        | 403.8642        |
|         | 1221.4436       | 611.2254        | 407.8194        | 10 | I      | 10 | 1108.5303       | 554.7688        | 370.1816        |
|         | 1308.4756       | 654.7415        | 436.8301        | 11 | S      | 9  | 995.4462        | 498.2268        | 332.4869        |
|         | 1409.5233       | 705.2653        | 470.5126        | 12 | T      | 8  | 908.4142        | 454.7107        | 303.4763        |
|         | 1496.5553       | 748.7813        | 499.5233        | 13 | S      | 7  | 807.3665        | 404.1869        | 269.7937        |
|         | 1597.6030       | 799.3052        | 533.2059        | 14 | T      | 6  | 720.3345        | 360.6709        | 240.7830        |
|         | 1694.6558       | 847.8315        | 565.5568        | 15 | P      | 5  | 619.2868        | 310.1471        | 207.1005        |
|         | 1781.6878       | 891.3475        | 594.5675        | 16 | S      | 4  | 522.2341        | 261.6207        | 174.7495        |
|         | 1910.7304       | 955.8688        | 637.5817        | 17 | E      | 3  | 435.2020        | 218.1047        | 145.7389        |
|         | 2041.7709       | 1021.3891       | 681.2618        | 18 | M      | 2  | 306.1594        | 153.5834        | 102.7247        |
|         |                 |                 |                 | 19 | R      | 1  | 175.1190        | 88.0631         | 59.0445         |

Annotated spectra from Saleem et. al. 2009

K.DK<sub>136</sub>K<sub>136</sub>EDAEEGGDSEETTNSDHD<sub>167</sub>GDER<sub>166</sub>S/4

0.8257

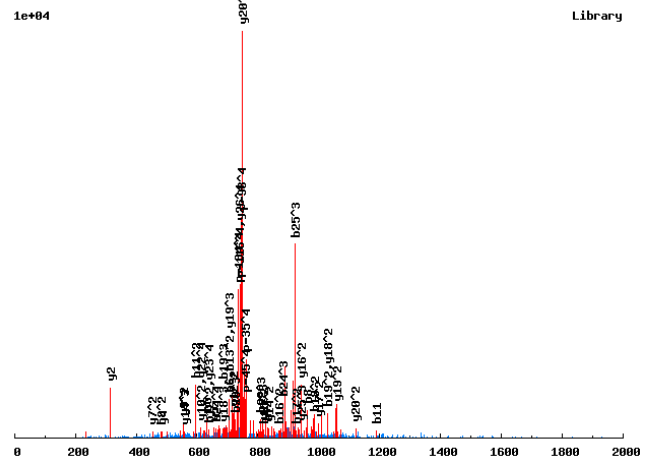

| Library | b <sup>1+</sup> | b <sup>2+</sup> | b <sup>3+</sup> | b <sup>4+</sup> | #  | AA     | #  | y <sup>1+</sup> | y <sup>2+</sup> | y <sup>3+</sup> | y <sup>4+</sup> |
|---------|-----------------|-----------------|-----------------|-----------------|----|--------|----|-----------------|-----------------|-----------------|-----------------|
|         | 116.0342        | 58.5207         | 39.3496         | 29.7640         | 1  | D      | 27 |                 |                 |                 |                 |
|         | 252.1434        | 126.5753        | 84.7193         | 63.7913         | 2  | K[136] | 26 | 2958.1238       | 1479.5656       | 986.7128        | 740.2864        |
|         | 388.2525        | 194.6299        | 130.0890        | 97.8186         | 3  | K[136] | 25 | 2822.0147       | 1411.5110       | 941.3431        | 706.2591        |
|         | 517.2951        | 259.1512        | 173.1032        | 130.0792        | 4  | E      | 24 | 2685.9055       | 1343.4564       | 895.9734        | 672.2318        |
|         | 632.3221        | 316.6647        | 211.4455        | 158.8360        | 5  | D      | 23 | 2556.8629       | 1278.9351       | 852.9592        | 639.9712        |
|         | 703.3592        | 352.1832        | 235.1246        | 176.5953        | 6  | A      | 22 | 2441.8360       | 1221.4216       | 814.6168        | 611.2145        |
|         | 832.4018        | 416.7045        | 278.1388        | 208.8559        | 7  | E      | 21 | 2370.7989       | 1185.9031       | 790.9378        | 593.4552        |
|         | 961.4444        | 481.2258        | 321.1530        | 241.1165        | 8  | E      | 20 | 2241.7563       | 1121.3818       | 747.9236        | 561.1945        |
|         | 1018.4658       | 509.7365        | 340.1601        | 255.3719        | 9  | G      | 19 | 2112.7137       | 1056.8605       | 704.9094        | 528.9339        |
|         | 1075.4873       | 538.2473        | 359.1673        | 269.6273        | 10 | G      | 18 | 2055.6922       | 1028.3498       | 685.9023        | 514.6785        |
|         | 1190.5142       | 595.7607        | 397.5096        | 298.3840        | 11 | D      | 17 | 1998.6708       | 999.8390        | 666.8951        | 500.4232        |
|         | 1277.5462       | 639.2768        | 426.5203        | 320.1420        | 12 | S      | 16 | 1883.6438       | 942.3256        | 628.5528        | 471.6664        |
|         | 1406.5888       | 703.7981        | 469.5345        | 352.4027        | 13 | E      | 15 | 1796.6118       | 898.8095        | 599.5421        | 449.9084        |
|         | 1535.6314       | 768.3194        | 512.5487        | 384.6633        | 14 | E      | 14 | 1667.5692       | 834.2882        | 556.5279        | 417.6478        |
|         | 1636.6791       | 818.8432        | 546.2312        | 409.9252        | 15 | T      | 13 | 1538.5266       | 769.7669        | 513.5137        | 385.3871        |
|         | 1737.7268       | 869.3670        | 579.9138        | 435.1872        | 16 | T      | 12 | 1437.4789       | 719.2431        | 479.8312        | 360.1252        |
|         | 1851.7697       | 926.3885        | 617.9281        | 463.6979        | 17 | N      | 11 | 1336.4313       | 668.7193        | 446.1486        | 334.8633        |
|         | 1966.7967       | 983.9020        | 656.2704        | 492.4546        | 18 | D      | 10 | 1222.3883       | 611.6978        | 408.1343        | 306.3525        |
|         | 2053.8287       | 1027.4180       | 685.2811        | 514.2126        | 19 | S      | 9  | 1107.3614       | 554.1843        | 369.7920        | 277.5958        |
|         | 2168.8556       | 1084.9315       | 723.6234        | 542.9694        | 20 | D      | 8  | 1020.3294       | 510.6683        | 340.7813        | 255.8378        |
|         | 2305.9145       | 1153.4609       | 769.3097        | 577.2341        | 21 | H      | 7  | 905.3024        | 453.1549        | 302.4390        | 227.0811        |
|         | 2420.9415       | 1210.9744       | 807.6520        | 605.9908        | 22 | D      | 6  | 768.2435        | 384.6254        | 256.7527        | 192.8163        |
|         | 2587.9398       | 1294.4736       | 863.3181        | 647.7404        | 23 | S[167] | 5  | 653.2166        | 327.1119        | 218.4104        | 164.0596        |
|         | 2644.9613       | 1322.9843       | 882.3253        | 661.9958        | 24 | G      | 4  | 486.2182        | 243.6127        | 162.7443        | 122.3100        |
|         | 2759.9882       | 1380.4978       | 920.6676        | 690.7525        | 25 | D      | 3  | 429.1967        | 215.1020        | 143.7371        | 108.0546        |
|         | 2889.0308       | 1445.0191       | 963.6818        | 723.0132        | 26 | E      | 2  | 314.1698        | 157.5885        | 105.3948        | 79.2979         |
|         |                 |                 |                 |                 | 27 | R[166] | 1  | 185.1272        | 93.0672         | 62.3806         | 47.0373         |

# Annotated spectra from Saleem et. al. 2009

R.DLEES<sub>167</sub>NRR.Y/2

0.8729

1e+04

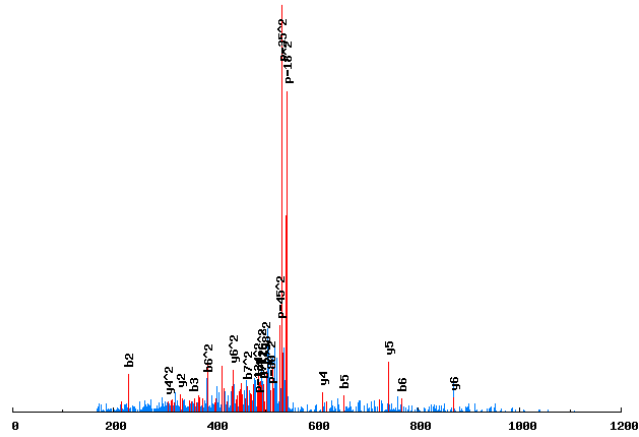

| Library | b <sup>1+</sup> | b <sup>2+</sup> | # | AA     | # | y <sup>1+</sup> | y <sup>2+</sup> |
|---------|-----------------|-----------------|---|--------|---|-----------------|-----------------|
|         | 116.0342        | 58.5207         | 1 | D      | 8 |                 |                 |
|         | 229.1183        | 115.0628        | 2 | L      | 7 | 983.4306        | 492.2189        |
|         | 358.1609        | 179.5841        | 3 | E      | 6 | 870.3465        | 435.6769        |
|         | 487.2035        | 244.1054        | 4 | E      | 5 | 741.3039        | 371.1556        |
|         | 654.2018        | 327.6046        | 5 | S[167] | 4 | 612.2614        | 306.6343        |
|         | 768.2448        | 384.6260        | 6 | N      | 3 | 445.2630        | 223.1351        |
|         | 924.3459        | 462.6766        | 7 | R      | 2 | 331.2201        | 166.1137        |
|         |                 |                 | 8 | R      | 1 | 175.1190        | 88.0631         |

# Annotated spectra from Saleem et. al. 2009

K.DLPTS<sub>167</sub>KSPS<sub>167</sub>PKPR.T/3

0.9989

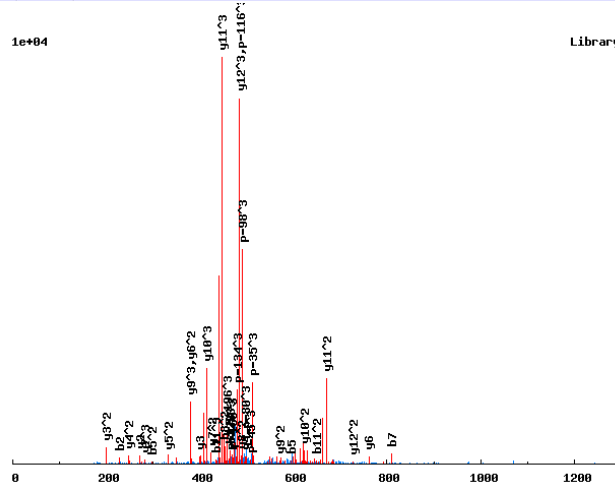

| Library | b <sup>1+</sup> | b <sup>2+</sup> | b <sup>3+</sup> | #  | AA     | #  | y <sup>1+</sup> | y <sup>2+</sup> | y <sup>3+</sup> |
|---------|-----------------|-----------------|-----------------|----|--------|----|-----------------|-----------------|-----------------|
|         | 116.0342        | 58.5207         | 39.3496         | 1  | D      | 13 |                 |                 |                 |
|         | <b>229.1183</b> | 115.0628        | 77.0443         | 2  | L      | 12 | 1454.6804       | <b>727.8438</b> | <b>485.5650</b> |
|         | 326.1710        | 163.5892        | 109.3952        | 3  | P      | 11 | 1341.5963       | <b>671.3018</b> | <b>447.8703</b> |
|         | 427.2187        | 214.1130        | 143.0778        | 4  | T      | 10 | 1244.5436       | <b>622.7754</b> | <b>415.5194</b> |
|         | <b>594.2171</b> | <b>297.6122</b> | 198.7439        | 5  | S[167] | 9  | 1143.4959       | <b>572.2516</b> | <b>381.8368</b> |
|         | 722.3120        | 361.6597        | 241.4422        | 6  | K      | 8  | 976.4975        | <b>488.7524</b> | 326.1707        |
|         | <b>809.3441</b> | 405.1757        | 270.4529        | 7  | S      | 7  | 848.4026        | <b>424.7049</b> | <b>283.4724</b> |
|         | 906.3968        | <b>453.7021</b> | 302.8038        | 8  | P      | 6  | <b>761.3706</b> | <b>381.1889</b> | 254.4617        |
|         | 1073.3952       | 537.2012        | 358.4699        | 9  | S[167] | 5  | 664.3178        | <b>332.6625</b> | 222.1108        |
|         | 1170.4480       | 585.7276        | 390.8208        | 10 | P      | 4  | <b>497.3194</b> | <b>249.1634</b> | 166.4447        |
|         | 1298.5429       | <b>649.7751</b> | <b>433.5192</b> | 11 | K      | 3  | <b>400.2667</b> | <b>200.6370</b> | 134.0937        |
|         | 1395.5957       | 698.3015        | <b>465.8701</b> | 12 | P      | 2  | <b>272.1717</b> | 136.5895        | 91.3954         |
|         |                 |                 |                 | 13 | R      | 1  | 175.1190        | 88.0631         | 59.0445         |

# Annotated spectra from Saleem et. al. 2009

K.DLPTS<sub>167</sub>K<sub>136</sub>S<sub>167</sub>PS<sub>167</sub>PK<sub>136</sub>PR<sub>166</sub>T/3

0.5978

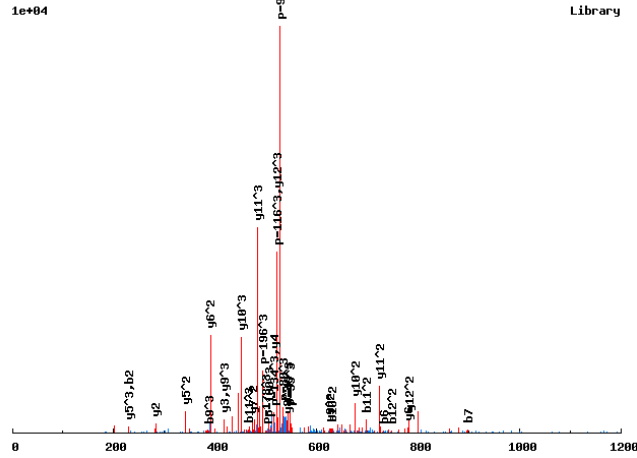

| Library | b <sup>1+</sup> | b <sup>2+</sup> | b <sup>3+</sup> | #  | AA     | #  | y <sup>1+</sup> | y <sup>2+</sup> | y <sup>3+</sup> |
|---------|-----------------|-----------------|-----------------|----|--------|----|-----------------|-----------------|-----------------|
|         | 116.0342        | 58.5207         | 39.3496         | 1  | D      | 13 |                 |                 |                 |
|         | <b>229.1183</b> | 115.0628        | 77.0443         | 2  | L      | 12 | 1560.6834       | <b>780.8453</b> | <b>520.8993</b> |
|         | 326.1710        | 163.5892        | 109.3952        | 3  | P      | 11 | 1447.5993       | <b>724.3033</b> | <b>483.2046</b> |
|         | 427.2187        | 214.1130        | 143.0778        | 4  | T      | 10 | 1350.5466       | <b>675.7769</b> | <b>450.8537</b> |
|         | 594.2171        | 297.6122        | 198.7439        | 5  | S[167] | 9  | 1249.4989       | <b>625.2531</b> | <b>417.1712</b> |
|         | <b>730.3262</b> | 365.6668        | 244.1136        | 6  | K[136] | 8  | 1082.5005       | <b>541.7539</b> | 361.5050        |
|         | <b>897.3246</b> | 449.1659        | 299.7797        | 7  | S[167] | 7  | 946.3914        | <b>473.6993</b> | 316.1353        |
|         | 994.3774        | 497.6923        | 332.1306        | 8  | P      | 6  | <b>779.3930</b> | <b>390.2001</b> | 260.4692        |
|         | 1161.3757       | 581.1915        | <b>387.7968</b> | 9  | S[167] | 5  | 682.3403        | <b>341.6738</b> | <b>228.1183</b> |
|         | 1258.4285       | <b>629.7179</b> | 420.1477        | 10 | P      | 4  | <b>515.3419</b> | 258.1746        | 172.4522        |
|         | 1394.5376       | <b>697.7725</b> | <b>465.5174</b> | 11 | K[136] | 3  | <b>418.2891</b> | 209.6482        | 140.1012        |
|         | 1491.5904       | <b>746.2988</b> | 497.8683        | 12 | P      | 2  | <b>282.1800</b> | 141.5936        | 94.7315         |
|         |                 |                 |                 | 13 | R[166] | 1  | 185.1272        | 93.0672         | 62.3806         |

# Annotated spectra from Saleem et. al. 2009

R.DMPTE<sub>167</sub>NKS<sub>167</sub>INETVGLSSTTNTVK.K/3

0.9358

1e+04

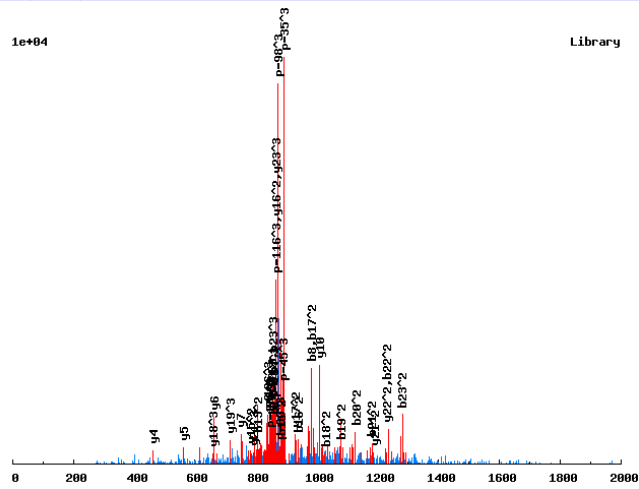

| Library | b <sup>1+</sup> | b <sup>2+</sup> | b <sup>3+</sup> | #  | AA     | #  | y <sup>1+</sup> | y <sup>2+</sup> | y <sup>3+</sup> |
|---------|-----------------|-----------------|-----------------|----|--------|----|-----------------|-----------------|-----------------|
|         | 116.0342        | 58.5207         | 39.3496         | 1  | D      | 24 |                 |                 |                 |
|         | 247.0747        | 124.0410        | 83.0298         | 2  | M      | 23 | 2598.1406       | 1299.5739       | 866.7184        |
|         | 344.1275        | 172.5674        | 115.3807        | 3  | P      | 22 | 2467.1001       | 1234.0537       | 823.0382        |
|         | 445.1751        | 223.0912        | 149.0632        | 4  | T      | 21 | 2370.0473       | 1185.5273       | 790.6873        |
|         | 574.2177        | 287.6125        | 192.0774        | 5  | E      | 20 | 2268.9996       | 1135.0035       | 757.0047        |
|         | 741.2161        | 371.1117        | 247.7436        | 6  | S[167] | 19 | 2139.9570       | 1070.4822       | 713.9905        |
|         | 855.2590        | 428.1332        | 285.7579        | 7  | N      | 18 | 1972.9587       | 986.9830        | 658.3244        |
|         | 983.3540        | 492.1806        | 328.4562        | 8  | K      | 17 | 1858.9158       | 929.9615        | 620.3101        |
|         | 1150.3524       | 575.6798        | 384.1223        | 9  | S[167] | 16 | 1730.8208       | 865.9140        | 577.6118        |
|         | 1263.4364       | 632.2218        | 421.8170        | 10 | I      | 15 | 1563.8224       | 782.4149        | 521.9457        |
|         | 1377.4793       | 689.2433        | 459.8313        | 11 | N      | 14 | 1450.7384       | 725.8728        | 484.2510        |
|         | 1506.5219       | 753.7646        | 502.8455        | 12 | E      | 13 | 1336.6954       | 668.8514        | 446.2367        |
|         | 1607.5696       | 804.2884        | 536.5281        | 13 | T      | 12 | 1207.6528       | 604.3301        | 403.2225        |
|         | 1706.6380       | 853.8227        | 569.5509        | 14 | V      | 11 | 1106.6052       | 553.8062        | 369.5399        |
|         | 1763.6595       | 882.3334        | 588.5580        | 15 | G      | 10 | 1007.5368       | 504.2720        | 336.5171        |
|         | 1876.7435       | 938.8754        | 626.2527        | 16 | L      | 9  | 950.5153        | 475.7613        | 317.5100        |
|         | 1963.7756       | 982.3914        | 655.2634        | 17 | S      | 8  | 837.4312        | 419.2193        | 279.8153        |
|         | 2050.8076       | 1025.9074       | 684.2741        | 18 | S      | 7  | 750.3992        | 375.7032        | 250.8046        |
|         | 2151.8553       | 1076.4313       | 717.9566        | 19 | T      | 6  | 663.3672        | 332.1872        | 221.7939        |
|         | 2252.9030       | 1126.9551       | 751.6392        | 20 | T      | 5  | 562.3195        | 281.6634        | 188.1114        |
|         | 2366.9459       | 1183.9766       | 789.6535        | 21 | N      | 4  | 461.2718        | 231.1395        | 154.4288        |
|         | 2467.9936       | 1234.5004       | 823.3360        | 22 | T      | 3  | 347.2289        | 174.1181        | 116.4145        |
|         | 2567.0620       | 1284.0346       | 856.3588        | 23 | V      | 2  | 246.1812        | 123.5942        | 82.7319         |
|         |                 |                 |                 | 24 | K      | 1  | 147.1128        | 74.0600         | 49.7091         |

# Annotated spectra from Saleem et. al. 2009

R.DMPTE<sub>167</sub>NK<sub>136</sub>S<sub>167</sub>INETVGLSS<sub>167</sub>TTNTVK<sub>136</sub>K/3

0.8647

1e+04

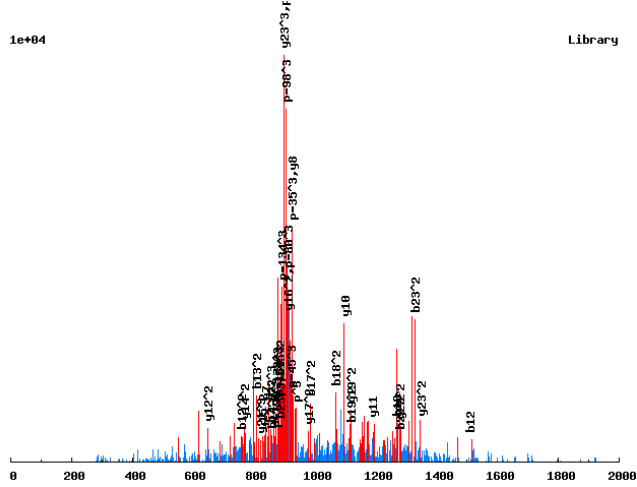

| Library | b <sup>1+</sup> | b <sup>2+</sup> | b <sup>3+</sup> | #  | AA     | #  | y <sup>1+</sup> | y <sup>2+</sup> | y <sup>3+</sup> |
|---------|-----------------|-----------------|-----------------|----|--------|----|-----------------|-----------------|-----------------|
|         | 116.0342        | 58.5207         | 39.3496         | 1  | D      | 24 |                 |                 |                 |
|         | 247.0747        | 124.0410        | 83.0298         | 2  | M      | 23 | 2694.1353       | 1347.5713       | 898.7166        |
|         | 344.1275        | 172.5674        | 115.3807        | 3  | P      | 22 | 2563.0948       | 1282.0510       | 855.0365        |
|         | 445.1751        | 223.0912        | 149.0632        | 4  | T      | 21 | 2466.0420       | 1233.5247       | 822.6855        |
|         | 574.2177        | 287.6125        | 192.0774        | 5  | E      | 20 | 2364.9944       | 1183.0008       | 789.0030        |
|         | 741.2161        | 371.1117        | 247.7436        | 6  | S[167] | 19 | 2235.9518       | 1118.4795       | 745.9888        |
|         | 855.2590        | 428.1332        | 285.7579        | 7  | N      | 18 | 2068.9534       | 1034.9803       | 690.3227        |
|         | 991.3682        | 496.1877        | 331.1276        | 8  | K[136] | 17 | 1954.9105       | 977.9589        | 652.3083        |
|         | 1158.3666       | 579.6869        | 386.7937        | 9  | S[167] | 16 | 1818.8013       | 909.9043        | 606.9386        |
|         | 1271.4506       | 636.2289        | 424.4884        | 10 | I      | 15 | 1651.8030       | 826.4051        | 551.2725        |
|         | 1385.4935       | 693.2504        | 462.5027        | 11 | N      | 14 | 1538.7189       | 769.8631        | 513.5778        |
|         | 1514.5361       | 757.7717        | 505.5169        | 12 | E      | 13 | 1424.6760       | 712.8416        | 475.5635        |
|         | 1615.5838       | 808.2955        | 539.1995        | 13 | T      | 12 | 1295.6334       | 648.3203        | 432.5493        |
|         | 1714.6522       | 857.8298        | 572.2223        | 14 | V      | 11 | 1194.5857       | 597.7965        | 398.8668        |
|         | 1771.6737       | 886.3405        | 591.2294        | 15 | G      | 10 | 1095.5173       | 548.2623        | 365.8439        |
|         | 1884.7577       | 942.8825        | 628.9241        | 16 | L      | 9  | 1038.4958       | 519.7516        | 346.8368        |
|         | 1971.7898       | 986.3985        | 657.9348        | 17 | S      | 8  | 925.4118        | 463.2095        | 309.1421        |
|         | 2138.7881       | 1069.8977       | 713.6009        | 18 | S[167] | 7  | 838.3797        | 419.6935        | 280.1314        |
|         | 2239.8358       | 1120.4215       | 747.2835        | 19 | T      | 6  | 671.3814        | 336.1943        | 224.4653        |
|         | 2340.8835       | 1170.9454       | 780.9660        | 20 | T      | 5  | 570.3337        | 285.6705        | 190.7828        |
|         | 2454.9264       | 1227.9669       | 818.9803        | 21 | N      | 4  | 469.2860        | 235.1466        | 157.1002        |
|         | 2555.9741       | 1278.4907       | 852.6629        | 22 | T      | 3  | 355.2431        | 178.1252        | 119.0859        |
|         | 2655.0425       | 1328.0249       | 885.6857        | 23 | V      | 2  | 254.1954        | 127.6013        | 85.4033         |
|         |                 |                 |                 | 24 | K[136] | 1  | 155.1270        | 78.0671         | 52.3805         |

# Annotated spectra from Saleem et. al. 2009

K.DM<sub>147</sub>S<sub>167</sub>VETFFEK<sub>136</sub>G/2

0.9992

1e+04

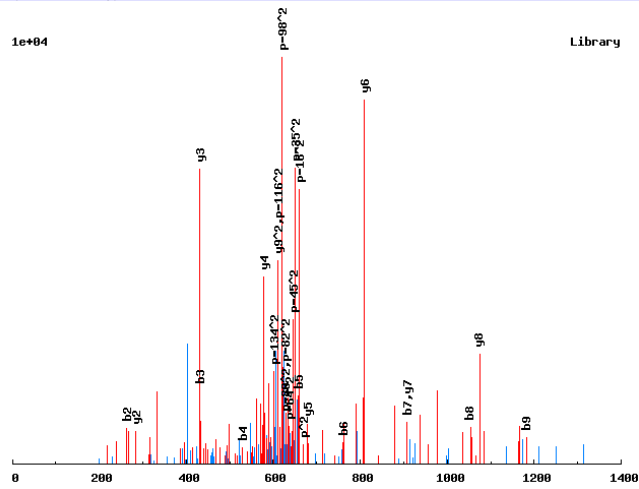

| Library | b <sup>1+</sup> | b <sup>2+</sup> | #  | AA     | #  | y <sup>1+</sup> | y <sup>2+</sup> |
|---------|-----------------|-----------------|----|--------|----|-----------------|-----------------|
|         | 116.0342        | 58.5207         | 1  | D      | 10 |                 |                 |
|         | 263.0696        | 132.0384        | 2  | M[147] | 9  | 1221.4988       | 611.2531        |
|         | 430.0680        | 215.5376        | 3  | S[167] | 8  | 1074.4634       | 537.7354        |
|         | 529.1364        | 265.0718        | 4  | V      | 7  | 907.4651        | 454.2362        |
|         | 658.1790        | 329.5931        | 5  | E      | 6  | 808.3967        | 404.7020        |
|         | 759.2267        | 380.1170        | 6  | T      | 5  | 679.3541        | 340.1807        |
|         | 906.2951        | 453.6512        | 7  | F      | 4  | 578.3064        | 289.6568        |
|         | 1053.3635       | 527.1854        | 8  | F      | 3  | 431.2380        | 216.1226        |
|         | 1182.4061       | 591.7067        | 9  | E      | 2  | 284.1696        | 142.5884        |
|         |                 |                 | 10 | K[136] | 1  | 155.1270        | 78.0671         |



# Annotated spectra from Saleem et. al. 2009

K.DNKLPLSNENDS<sub>167</sub>S<sub>167</sub>DEEENEKELP.-/3

0.9324

1e+04

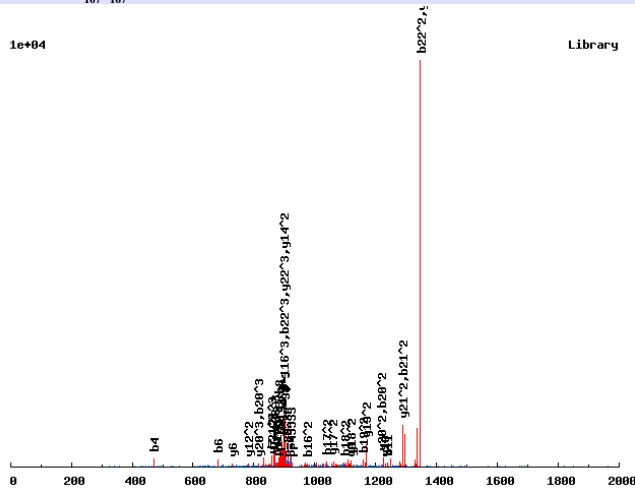

| Library | b <sup>1+</sup> | b <sup>2+</sup> | b <sup>3+</sup> | #  | AA     | #  | y <sup>1+</sup> | y <sup>2+</sup> | y <sup>3+</sup> |
|---------|-----------------|-----------------|-----------------|----|--------|----|-----------------|-----------------|-----------------|
|         | 116.0342        | 58.5207         | 39.3496         | 1  | D      | 23 |                 |                 |                 |
|         | 230.0771        | 115.5422        | 77.3639         | 2  | N      | 22 | 2690.0754       | 1345.5413       | 897.3633        |
|         | 358.1721        | 179.5897        | 120.0622        | 3  | K      | 21 | 2576.0324       | 1288.5199       | 859.3490        |
|         | 471.2562        | 236.1317        | 157.7569        | 4  | L      | 20 | 2447.9375       | 1224.4724       | 816.6507        |
|         | 568.3089        | 284.6581        | 190.1078        | 5  | P      | 19 | 2334.8534       | 1167.9303       | 778.9560        |
|         | 681.3930        | 341.2001        | 227.8025        | 6  | L      | 18 | 2237.8006       | 1119.4040       | 746.6051        |
|         | 768.4250        | 384.7162        | 256.8132        | 7  | S      | 17 | 2124.7166       | 1062.8619       | 708.9104        |
|         | 882.4679        | 441.7376        | 294.8275        | 8  | N      | 16 | 2037.6846       | 1019.3459       | 679.8997        |
|         | 1011.5105       | 506.2589        | 337.8417        | 9  | E      | 15 | 1923.6416       | 962.3245        | 641.8854        |
|         | 1125.5535       | 563.2804        | 375.8560        | 10 | N      | 14 | 1794.5990       | 897.8032        | 598.8712        |
|         | 1240.5804       | 620.7938        | 414.1983        | 11 | D      | 13 | 1680.5561       | 840.7817        | 560.8569        |
|         | 1407.5788       | 704.2930        | 469.8644        | 12 | S[167] | 12 | 1565.5292       | 783.2682        | 522.5146        |
|         | 1574.5771       | 787.7922        | 525.5306        | 13 | S[167] | 11 | 1398.5308       | 699.7690        | 466.8485        |
|         | 1689.6041       | 845.3057        | 563.8729        | 14 | D      | 10 | 1231.5324       | 616.2699        | 411.1823        |
|         | 1818.6467       | 909.8270        | 606.8871        | 15 | E      | 9  | 1116.5055       | 558.7564        | 372.8400        |
|         | 1947.6893       | 974.3483        | 649.9013        | 16 | E      | 8  | 987.4629        | 494.2351        | 329.8258        |
|         | 2076.7318       | 1038.8696       | 692.9155        | 17 | E      | 7  | 858.4203        | 429.7138        | 286.8116        |
|         | 2190.7748       | 1095.8910       | 730.9298        | 18 | N      | 6  | 729.3777        | 365.1925        | 243.7974        |
|         | 2319.8174       | 1160.4123       | 773.9440        | 19 | E      | 5  | 615.3348        | 308.1710        | 205.7831        |
|         | 2447.9123       | 1224.4598       | 816.6423        | 20 | K      | 4  | 486.2922        | 243.6497        | 162.7689        |
|         | 2576.9549       | 1288.9811       | 859.6565        | 21 | E      | 3  | 358.1972        | 179.6023        | 120.0706        |
|         | 2690.0390       | 1345.5231       | 897.3512        | 22 | L      | 2  | 229.1547        | 115.0810        | 77.0564         |
|         |                 |                 |                 | 23 | P      | 1  | 116.0706        | 58.5389         | 39.3617         |

# Annotated spectra from Saleem et. al. 2009

K.DNS<sub>167</sub>DVERVEEDAGKRL/3

0.9952

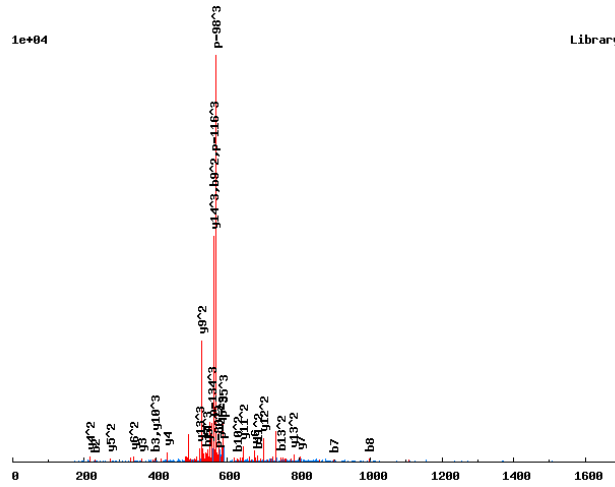

| Library | b <sup>1+</sup> | b <sup>2+</sup> | b <sup>3+</sup> | #  | AA     | #  | y <sup>1+</sup> | y <sup>2+</sup> | y <sup>3+</sup> |
|---------|-----------------|-----------------|-----------------|----|--------|----|-----------------|-----------------|-----------------|
|         | 116.0342        | 58.5207         | 39.3496         | 1  | D      | 15 |                 |                 |                 |
|         | <b>230.0771</b> | 115.5422        | 77.3639         | 2  | N      | 14 | 1683.7334       | 842.3703        | <b>561.9160</b> |
|         | <b>397.0755</b> | 199.0414        | 133.0300        | 3  | S[167] | 13 | 1569.6904       | <b>785.3489</b> | <b>523.9017</b> |
|         | 512.1025        | 256.5549        | 171.3723        | 4  | D      | 12 | 1402.6921       | <b>701.8497</b> | 468.2355        |
|         | 611.1709        | 306.0891        | 204.3951        | 5  | V      | 11 | 1287.6651       | <b>644.3362</b> | 429.8932        |
|         | 740.2135        | 370.6104        | 247.4093        | 6  | E      | 10 | 1188.5967       | 594.8020        | <b>396.8704</b> |
|         | <b>896.3146</b> | 448.6609        | 299.4430        | 7  | R      | 9  | 1059.5541       | <b>530.2807</b> | 353.8562        |
|         | <b>995.3830</b> | 498.1951        | 332.4658        | 8  | V      | 8  | 903.4530        | 452.2301        | 301.8225        |
|         | 1124.4256       | <b>562.7164</b> | 375.4800        | 9  | E      | 7  | <b>804.3846</b> | 402.6959        | 268.7997        |
|         | 1253.4682       | <b>627.2377</b> | 418.4942        | 10 | E      | 6  | <b>675.3420</b> | <b>338.1746</b> | 225.7855        |
|         | 1368.4951       | <b>684.7512</b> | 456.8366        | 11 | D      | 5  | <b>546.2994</b> | <b>273.6534</b> | 182.7713        |
|         | 1439.5322       | 720.2697        | 480.5156        | 12 | A      | 4  | <b>431.2725</b> | <b>216.1399</b> | 144.4290        |
|         | 1496.5537       | <b>748.7805</b> | 499.5227        | 13 | G      | 3  | <b>360.2354</b> | 180.6213        | 120.7500        |
|         | 1624.6486       | 812.8280        | <b>542.2211</b> | 14 | K      | 2  | 303.2139        | 152.1106        | 101.7428        |
|         |                 |                 |                 | 15 | R      | 1  | 175.1190        | 88.0631         | 59.0445         |

# Annotated spectra from Saleem et. al. 2009

R.DNS<sub>167</sub>FAS<sub>167</sub>INGQPEQELQYK.E/2

0.999

1e+04

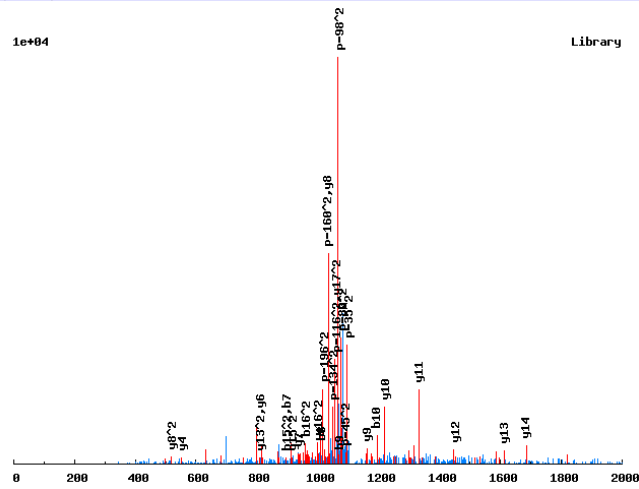

| Library | b <sup>1+</sup> | b <sup>2+</sup> | #  | AA     | #  | y <sup>1+</sup> | y <sup>2+</sup> |
|---------|-----------------|-----------------|----|--------|----|-----------------|-----------------|
|         | 116.0342        | 58.5207         | 1  | D      | 18 |                 |                 |
|         | 230.0771        | 115.5422        | 2  | N      | 17 | 2112.8675       | 1056.9374       |
|         | 397.0755        | 199.0414        | 3  | S[167] | 16 | 1998.8246       | 999.9159        |
|         | 544.1439        | 272.5756        | 4  | F      | 15 | 1831.8262       | 916.4167        |
|         | 615.1810        | 308.0942        | 5  | A      | 14 | 1684.7578       | 842.8825        |
|         | 782.1794        | 391.5933        | 6  | S[167] | 13 | 1613.7207       | 807.3640        |
|         | 895.2635        | 448.1354        | 7  | I      | 12 | 1446.7223       | 723.8648        |
|         | 1009.3064       | 505.1568        | 8  | N      | 11 | 1333.6383       | 667.3228        |
|         | 1066.3278       | 533.6676        | 9  | G      | 10 | 1219.5953       | 610.3013        |
|         | 1194.3864       | 597.6969        | 10 | Q      | 9  | 1162.5739       | 581.7906        |
|         | 1291.4392       | 646.2232        | 11 | P      | 8  | 1034.5153       | 517.7613        |
|         | 1420.4818       | 710.7445        | 12 | E      | 7  | 937.4625        | 469.2349        |
|         | 1548.5404       | 774.7738        | 13 | Q      | 6  | 808.4199        | 404.7136        |
|         | 1677.5829       | 839.2951        | 14 | E      | 5  | 680.3614        | 340.6843        |
|         | 1790.6670       | 895.8371        | 15 | L      | 4  | 551.3188        | 276.1630        |
|         | 1918.7256       | 959.8664        | 16 | Q      | 3  | 438.2347        | 219.6210        |
|         | 2081.7889       | 1041.3981       | 17 | Y      | 2  | 310.1761        | 155.5917        |
|         |                 |                 | 18 | K      | 1  | 147.1128        | 74.0600         |

Annotated spectra from Saleem et. al. 2009

K.DQETKES<sub>167</sub>ITNS<sub>167</sub>PTSEVPIETKL/3

0.9979

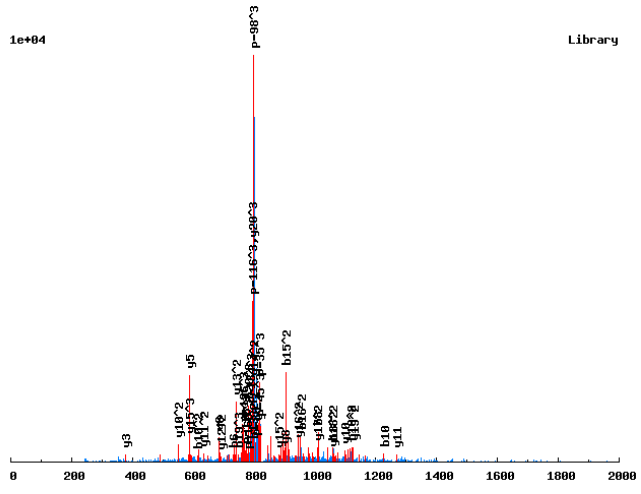

| Library | b <sup>1+</sup>  | b <sup>2+</sup>  | b <sup>3+</sup> | #  | AA     | #  | y <sup>1+</sup>  | y <sup>2+</sup>  | y <sup>3+</sup> |
|---------|------------------|------------------|-----------------|----|--------|----|------------------|------------------|-----------------|
|         | 116.0342         | 58.5207          | 39.3496         | 1  | D      | 21 |                  |                  |                 |
|         | 244.0928         | 122.5500         | 82.0358         | 2  | Q      | 20 | 2378.0412        | 1189.5242        | <b>793.3519</b> |
|         | 373.1354         | 187.0713         | 125.0500        | 3  | E      | 19 | 2249.9826        | <b>1125.4949</b> | 750.6657        |
|         | 474.1831         | 237.5952         | 158.7325        | 4  | T      | 18 | 2120.9400        | <b>1060.9736</b> | 707.6515        |
|         | 602.2780         | 301.6427         | 201.4309        | 5  | K      | 17 | 2019.8923        | <b>1010.4498</b> | 673.9690        |
|         | <b>731.3206</b>  | 366.1640         | 244.4451        | 6  | E      | 16 | 1891.7973        | <b>946.4023</b>  | 631.2706        |
|         | 898.3190         | 449.6631         | 300.1112        | 7  | S[167] | 15 | 1762.7548        | <b>881.8810</b>  | <b>588.2564</b> |
|         | <b>1011.4030</b> | 506.2052         | 337.8059        | 8  | I      | 14 | 1595.7564        | <b>798.3818</b>  | 532.5903        |
|         | 1112.4507        | 556.7290         | 371.4884        | 9  | T      | 13 | 1482.6723        | <b>741.8398</b>  | 494.8956        |
|         | <b>1226.4937</b> | <b>613.7505</b>  | 409.5027        | 10 | N      | 12 | 1381.6247        | <b>691.3160</b>  | 461.2131        |
|         | 1393.4920        | 697.2496         | 465.1689        | 11 | S[167] | 11 | <b>1267.5817</b> | <b>634.2945</b>  | 423.1988        |
|         | 1490.5448        | 745.7760         | 497.5198        | 12 | P      | 10 | <b>1100.5834</b> | <b>550.7953</b>  | 367.5326        |
|         | 1591.5925        | <b>796.2999</b>  | 531.2023        | 13 | T      | 9  | 1003.5306        | 502.2689         | 335.1817        |
|         | 1678.6245        | 839.8159         | 560.2130        | 14 | S      | 8  | <b>902.4829</b>  | 451.7451         | 301.4992        |
|         | 1807.6671        | <b>904.3372</b>  | 603.2272        | 15 | E      | 7  | <b>815.4509</b>  | 408.2291         | 272.4885        |
|         | 1906.7355        | <b>953.8714</b>  | 636.2500        | 16 | V      | 6  | <b>686.4083</b>  | 343.7078         | 229.4743        |
|         | 2003.7882        | 1002.3978        | 668.6009        | 17 | P      | 5  | <b>587.3399</b>  | 294.1736         | 196.4515        |
|         | 2116.8723        | <b>1058.9398</b> | 706.2956        | 18 | I      | 4  | 490.2871         | 245.6472         | 164.1006        |
|         | 2245.9149        | <b>1123.4611</b> | <b>749.3098</b> | 19 | E      | 3  | <b>377.2031</b>  | 189.1052         | 126.4059        |
|         | 2346.9626        | 1173.9849        | <b>782.9924</b> | 20 | T      | 2  | 248.1605         | 124.5839         | 83.3917         |
|         |                  |                  |                 | 21 | K      | 1  | 147.1128         | 74.0600          | 49.7091         |

# Annotated spectra from Saleem et. al. 2009

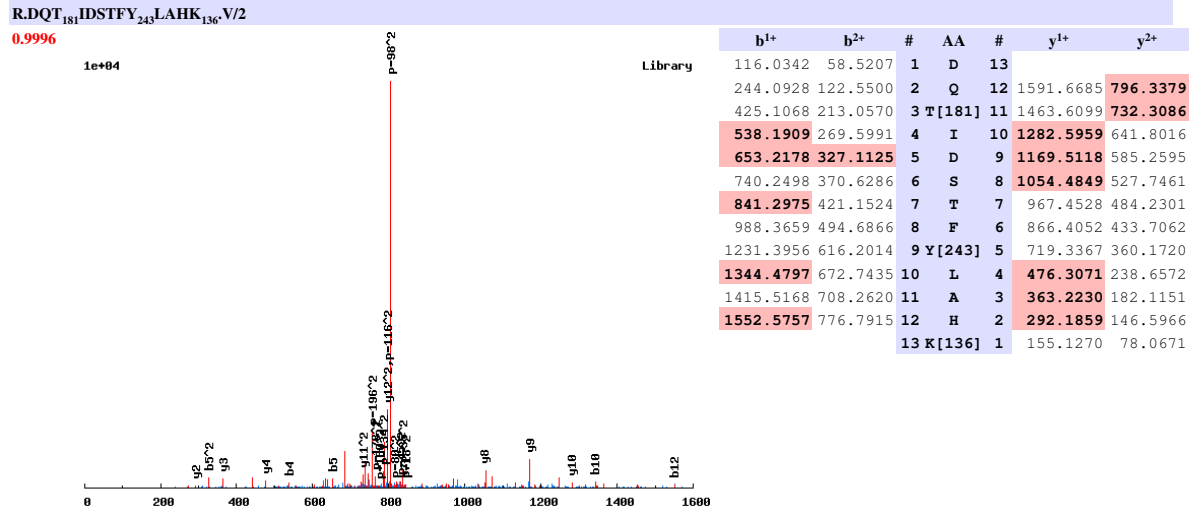

# Annotated spectra from Saleem et. al. 2009

R.DREQS<sub>167</sub>EEEEIEDFGESANPEK.F/3

0.9999

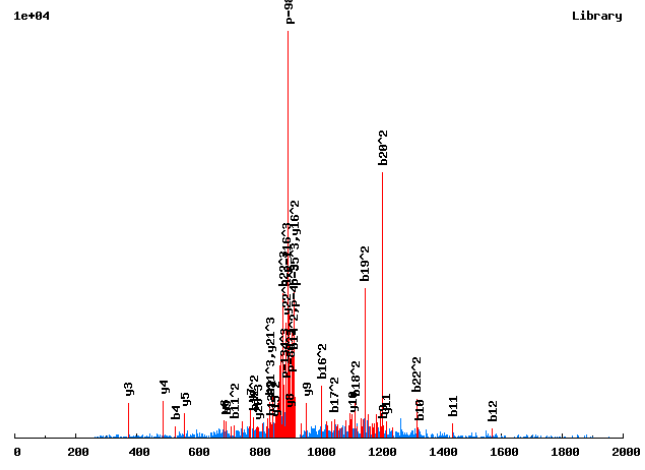

| Library | b <sup>1+</sup> | b <sup>2+</sup> | b <sup>3+</sup> | #  | AA     | #  | y <sup>1+</sup> | y <sup>2+</sup> | y <sup>3+</sup> |
|---------|-----------------|-----------------|-----------------|----|--------|----|-----------------|-----------------|-----------------|
|         | 116.0342        | 58.5207         | 39.3496         | 1  | D      | 23 |                 |                 |                 |
|         | 272.1353        | 136.5713        | 91.3833         | 2  | R      | 22 | 2676.0468       | 1338.5270       | 892.6871        |
|         | 401.1779        | 201.0926        | 134.3975        | 3  | E      | 21 | 2519.9457       | 1260.4765       | 840.6534        |
|         | 529.2365        | 265.1219        | 177.0837        | 4  | Q      | 20 | 2390.9031       | 1195.9552       | 797.6392        |
|         | 696.2349        | 348.6211        | 232.7498        | 5  | S[167] | 19 | 2262.8445       | 1131.9259       | 754.9530        |
|         | 825.2775        | 413.1424        | 275.7640        | 6  | E      | 18 | 2095.8462       | 1048.4267       | 699.2869        |
|         | 954.3200        | 477.6637        | 318.7782        | 7  | E      | 17 | 1966.8036       | 983.9054        | 656.2727        |
|         | 1083.3626       | 542.1850        | 361.7924        | 8  | E      | 16 | 1837.7610       | 919.3841        | 613.2585        |
|         | 1212.4052       | 606.7063        | 404.8066        | 9  | E      | 15 | 1708.7184       | 854.8628        | 570.2443        |
|         | 1327.4322       | 664.2197        | 443.1489        | 10 | D      | 14 | 1579.6758       | 790.3415        | 527.2301        |
|         | 1440.5162       | 720.7618        | 480.8436        | 11 | I      | 13 | 1464.6489       | 732.8281        | 488.8878        |
|         | 1569.5588       | 785.2830        | 523.8578        | 12 | E      | 12 | 1351.5648       | 676.2860        | 451.1931        |
|         | 1684.5858       | 842.7965        | 562.2001        | 13 | D      | 11 | 1222.5222       | 611.7647        | 408.1789        |
|         | 1831.6542       | 916.3307        | 611.2229        | 14 | F      | 10 | 1107.4953       | 554.2513        | 369.8366        |
|         | 1888.6756       | 944.8415        | 630.2301        | 15 | G      | 9  | 960.4269        | 480.7171        | 320.8138        |
|         | 2017.7182       | 1009.3627       | 673.2443        | 16 | E      | 8  | 903.4054        | 452.2063        | 301.8067        |
|         | 2104.7502       | 1052.8788       | 702.2549        | 17 | S      | 7  | 774.3628        | 387.6850        | 258.7925        |
|         | 2233.7928       | 1117.4001       | 745.2691        | 18 | E      | 6  | 687.3308        | 344.1690        | 229.7818        |
|         | 2304.8299       | 1152.9186       | 768.9482        | 19 | A      | 5  | 558.2882        | 279.6477        | 186.7676        |
|         | 2418.8729       | 1209.9401       | 806.9625        | 20 | N      | 4  | 487.2511        | 244.1292        | 163.0885        |
|         | 2515.9256       | 1258.4665       | 839.3134        | 21 | P      | 3  | 373.2081        | 187.1077        | 125.0742        |
|         | 2644.9682       | 1322.9878       | 882.3276        | 22 | E      | 2  | 276.1554        | 138.5813        | 92.7233         |
|         |                 |                 |                 | 23 | K      | 1  | 147.1128        | 74.0600         | 49.7091         |

# Annotated spectra from Saleem et. al. 2009

R.DSDATVVLP167EHTPRLS167MDDPYR.Q/3

0.992

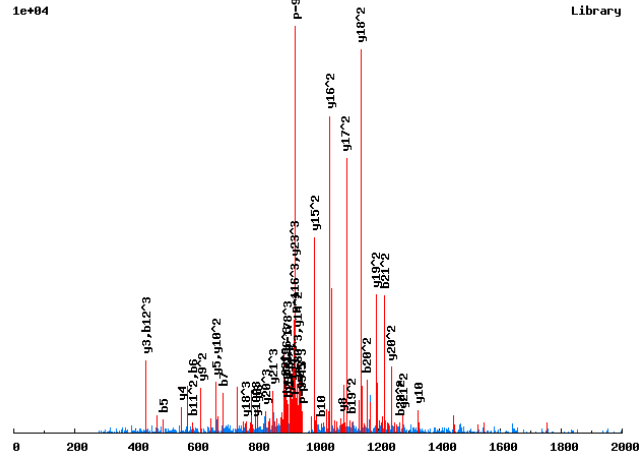

| Library | b <sup>1+</sup> | b <sup>2+</sup> | b <sup>3+</sup> | #  | AA      | #  | y <sup>1+</sup> | y <sup>2+</sup> | y <sup>3+</sup> |
|---------|-----------------|-----------------|-----------------|----|---------|----|-----------------|-----------------|-----------------|
|         | 116.0342        | 58.5207         | 39.3496         | 1  | D       | 24 |                 |                 |                 |
|         | 203.0662        | 102.0368        | 68.3603         | 2  | S       | 23 | 2759.2147       | 1380.1110       | 920.4098        |
|         | 318.0932        | 159.5502        | 106.7026        | 3  | D       | 22 | 2672.1827       | 1336.5950       | 891.3991        |
|         | 389.1303        | 195.0688        | 130.3816        | 4  | A       | 21 | 2557.1557       | 1279.0815       | 853.0568        |
|         | 490.1780        | 245.5926        | 164.0642        | 5  | T       | 20 | 2486.1186       | 1243.5630       | 829.3777        |
|         | 589.2464        | 295.1268        | 197.0870        | 6  | V       | 19 | 2385.0709       | 1193.0391       | 795.6952        |
|         | 688.3148        | 344.6610        | 230.1098        | 7  | V       | 18 | 2286.0025       | 1143.5049       | 762.6724        |
|         | 801.3989        | 401.2031        | 267.8045        | 8  | L       | 17 | 2186.9341       | 1093.9707       | 729.6496        |
|         | 898.4516        | 449.7295        | 300.1554        | 9  | P       | 16 | 2073.8501       | 1037.4287       | 691.9549        |
|         | 1011.5357       | 506.2715        | 337.8501        | 10 | L       | 15 | 1976.7973       | 988.9023        | 659.6040        |
|         | 1178.5340       | 589.7707        | 393.5162        | 11 | S [167] | 14 | 1863.7132       | 932.3603        | 621.9093        |
|         | 1307.5766       | 654.2920        | 436.5304        | 12 | E       | 13 | 1696.7149       | 848.8611        | 566.2431        |
|         | 1444.6355       | 722.8214        | 482.2167        | 13 | H       | 12 | 1567.6723       | 784.3398        | 523.2290        |
|         | 1545.6832       | 773.3453        | 515.8993        | 14 | T       | 11 | 1430.6134       | 715.8103        | 477.5426        |
|         | 1642.7360       | 821.8716        | 548.2502        | 15 | P       | 10 | 1329.5657       | 665.2865        | 443.8601        |
|         | 1798.8371       | 899.9222        | 600.2839        | 16 | R       | 9  | 1232.5129       | 616.7601        | 411.5092        |
|         | 1911.9212       | 956.4642        | 637.9786        | 17 | L       | 8  | 1076.4118       | 538.7096        | 359.4755        |
|         | 2078.9195       | 1039.9634       | 693.6447        | 18 | S [167] | 7  | 963.3278        | 482.1675        | 321.7808        |
|         | 2209.9600       | 1105.4836       | 737.3249        | 19 | M       | 6  | 796.3294        | 398.6683        | 266.1147        |
|         | 2324.9869       | 1162.9971       | 775.6672        | 20 | D       | 5  | 665.2889        | 333.1481        | 222.4345        |
|         | 2440.0139       | 1220.5106       | 814.0095        | 21 | D       | 4  | 550.2620        | 275.6346        | 184.0922        |
|         | 2537.0666       | 1269.0370       | 846.3604        | 22 | P       | 3  | 435.2350        | 218.1212        | 145.7499        |
|         | 2700.1300       | 1350.5686       | 900.7148        | 23 | Y       | 2  | 338.1823        | 169.5948        | 113.3989        |
|         |                 |                 |                 | 24 | R       | 1  | 175.1190        | 88.0631         | 59.0445         |

# Annotated spectra from Saleem et. al. 2009

K.DS<sub>167</sub>HSNS<sub>167</sub>S<sub>167</sub>S<sub>167</sub>R.N/3

0.8982

1e+04

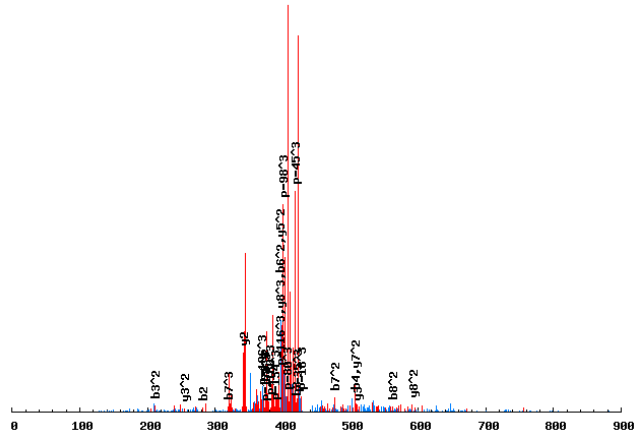

| Library | b <sup>1+</sup> | b <sup>2+</sup> | b <sup>3+</sup> | # | AA | #       | y <sup>1+</sup> | y <sup>2+</sup> | y <sup>3+</sup> |
|---------|-----------------|-----------------|-----------------|---|----|---------|-----------------|-----------------|-----------------|
|         | 116.0342        | 58.5207         | 39.3496         | 1 | D  | 9       |                 |                 |                 |
|         | <b>283.0326</b> | 142.0199        | 95.0157         | 2 | S  | [167] 8 | 1181.2463       | <b>591.1268</b> | <b>394.4203</b> |
|         | 420.0915        | <b>210.5494</b> | 140.7020        | 3 | H  | 7       | 1014.2479       | <b>507.6276</b> | 338.7542        |
|         | <b>507.1235</b> | 254.0654        | 169.7127        | 4 | S  | 6       | 877.1890        | 439.0981        | 293.0679        |
|         | 621.1665        | 311.0869        | 207.7270        | 5 | N  | 5       | 790.1570        | <b>395.5821</b> | 264.0572        |
|         | 788.1648        | <b>394.5860</b> | 263.3931        | 6 | S  | [167] 4 | 676.1140        | 338.5607        | 226.0429        |
|         | 955.1632        | <b>478.0852</b> | <b>319.0592</b> | 7 | S  | [167] 3 | <b>509.1157</b> | <b>255.0615</b> | 170.3767        |
|         | 1122.1615       | <b>561.5844</b> | <b>374.7254</b> | 8 | S  | [167] 2 | <b>342.1173</b> | 171.5623        | 114.7106        |
|         |                 |                 |                 | 9 | R  | 1       | 175.1190        | 88.0631         | 59.0445         |



# Annotated spectra from Saleem et. al. 2009

K.DSNS<sub>167</sub>LY<sub>243</sub>SLK<sub>136</sub>EPVSK<sub>136</sub>-N/2

0.6982

1e+04

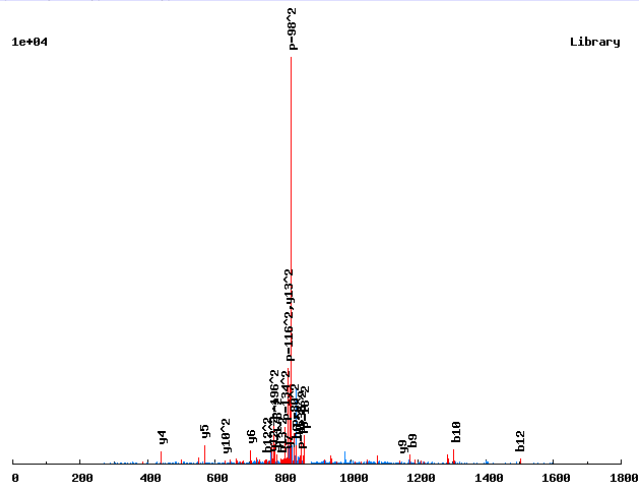

| Library | b <sup>1+</sup> | b <sup>2+</sup> | #  | AA     | #  | y <sup>1+</sup> | y <sup>2+</sup> |
|---------|-----------------|-----------------|----|--------|----|-----------------|-----------------|
|         | 116.0342        | 58.5207         | 1  | D      | 14 |                 |                 |
|         | 203.0662        | 102.0368        | 2  | S      | 13 | 1627.7351       | 814.3712        |
|         | 317.1092        | 159.0582        | 3  | N      | 12 | 1540.7031       | 770.8552        |
|         | 484.1075        | 242.5574        | 4  | S[167] | 11 | 1426.6601       | 713.8337        |
|         | 597.1916        | 299.0994        | 5  | L      | 10 | 1259.6618       | 630.3345        |
|         | 840.2213        | 420.6143        | 6  | Y[243] | 9  | 1146.5777       | 573.7925        |
|         | 927.2533        | 464.1303        | 7  | S      | 8  | 903.5480        | 452.2777        |
|         | 1040.3374       | 520.6723        | 8  | L      | 7  | 816.5160        | 408.7616        |
|         | 1176.4465       | 588.7269        | 9  | K[136] | 6  | 703.4319        | 352.2196        |
|         | 1305.4891       | 653.2482        | 10 | E      | 5  | 567.3228        | 284.1650        |
|         | 1402.5419       | 701.7746        | 11 | P      | 4  | 438.2802        | 219.6437        |
|         | 1501.6103       | 751.3088        | 12 | V      | 3  | 341.2274        | 171.1174        |
|         | 1588.6423       | 794.8248        | 13 | S      | 2  | 242.1590        | 121.5832        |
|         |                 |                 | 14 | K[136] | 1  | 155.1270        | 78.0671         |

# Annotated spectra from Saleem et. al. 2009

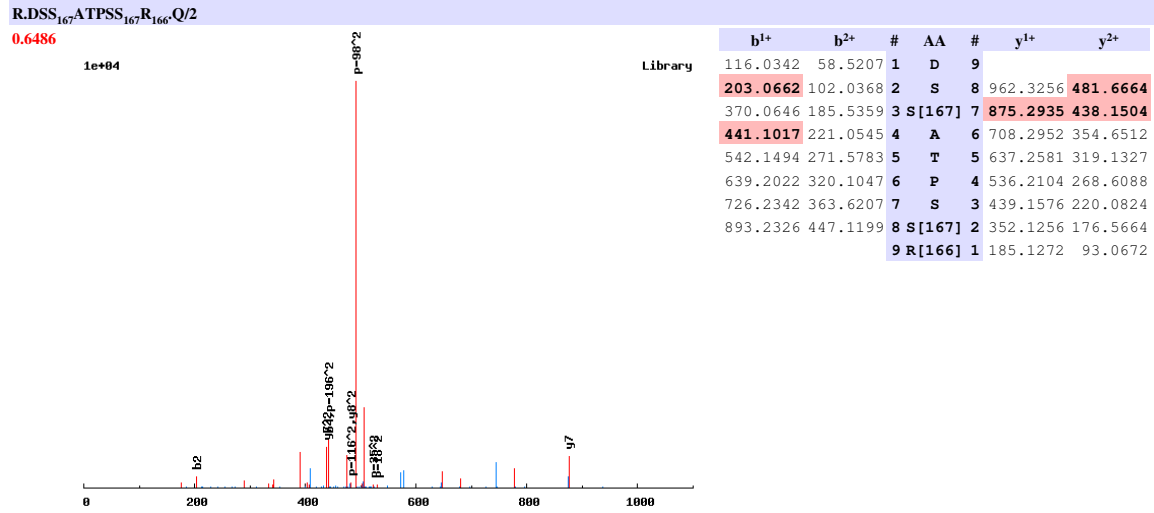

# Annotated spectra from Saleem et. al. 2009

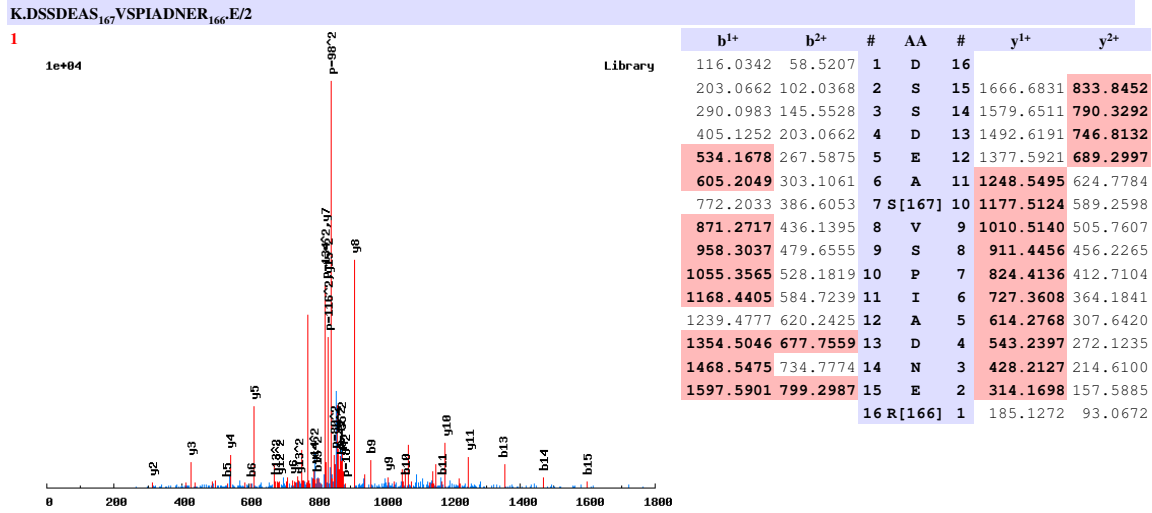

# Annotated spectra from Saleem et. al. 2009

R.DS<sub>167</sub>SDLAPTLR<sub>166</sub>S/2

0.7272

1e+04

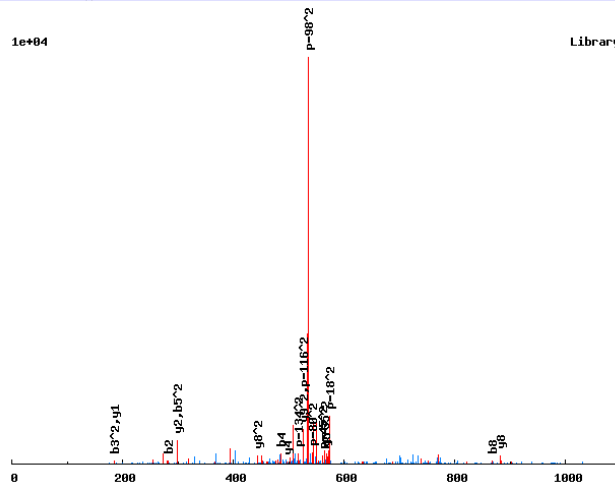

| Library | b <sup>1+</sup> | b <sup>2+</sup> | #  | AA     | #  | y <sup>1+</sup> | y <sup>2+</sup> |
|---------|-----------------|-----------------|----|--------|----|-----------------|-----------------|
|         | 116.0342        | 58.5207         | 1  | D      | 10 |                 |                 |
|         | <b>283.0326</b> | 142.0199        | 2  | S[167] | 9  | 1049.4902       | <b>525.2487</b> |
|         | 370.0646        | <b>185.5359</b> | 3  | S      | 8  | <b>882.4919</b> | <b>441.7496</b> |
|         | <b>485.0916</b> | 243.0494        | 4  | D      | 7  | 795.4598        | 398.2336        |
|         | 598.1756        | <b>299.5914</b> | 5  | L      | 6  | 680.4329        | 340.7201        |
|         | 669.2127        | 335.1100        | 6  | A      | 5  | <b>567.3488</b> | 284.1781        |
|         | 766.2655        | 383.6364        | 7  | P      | 4  | <b>496.3117</b> | 248.6595        |
|         | <b>867.3132</b> | 434.1602        | 8  | T      | 3  | 399.2590        | 200.1331        |
|         | 980.3972        | 490.7023        | 9  | L      | 2  | <b>298.2113</b> | 149.6093        |
|         |                 |                 | 10 | R[166] | 1  | <b>185.1272</b> | 93.0672         |

# Annotated spectra from Saleem et. al. 2009

K.DSSNSEDS<sub>167</sub>EDEEM<sub>147</sub>DGPILLHPGK.I/3

0.992

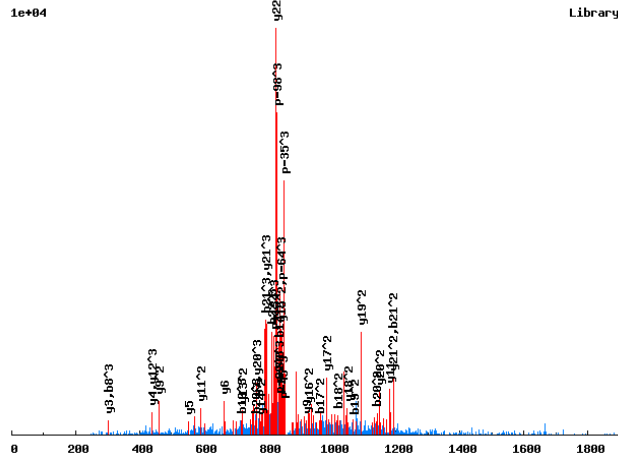

| Library | b <sup>1+</sup> | b <sup>2+</sup> | b <sup>3+</sup> | #  | AA      | #  | y <sup>1+</sup> | y <sup>2+</sup> | y <sup>3+</sup> |
|---------|-----------------|-----------------|-----------------|----|---------|----|-----------------|-----------------|-----------------|
|         | 116.0342        | 58.5207         | 39.3496         | 1  | D       | 23 |                 |                 |                 |
|         | 203.0662        | 102.0368        | 68.3603         | 2  | S       | 22 | 2469.9599       | 1235.4836       | 823.9915        |
|         | 290.0983        | 145.5528        | 97.3709         | 3  | S       | 21 | 2382.9279       | 1191.9676       | 794.9808        |
|         | 404.1412        | 202.5742        | 135.3853        | 4  | N       | 20 | 2295.8959       | 1148.4516       | 765.9701        |
|         | 491.1732        | 246.0903        | 164.3959        | 5  | S       | 19 | 2181.8529       | 1091.4301       | 727.9558        |
|         | 620.2158        | 310.6116        | 207.4101        | 6  | E       | 18 | 2094.8209       | 1047.9141       | 698.9452        |
|         | 735.2428        | 368.1250        | 245.7524        | 7  | D       | 17 | 1965.7783       | 983.3928        | 655.9310        |
|         | 902.2411        | 451.6242        | 301.4186        | 8  | S [167] | 16 | 1850.7514       | 925.8793        | 617.5886        |
|         | 1031.2837       | 516.1455        | 344.4328        | 9  | E       | 15 | 1683.7530       | 842.3801        | 561.9225        |
|         | 1146.3107       | 573.6590        | 382.7751        | 10 | D       | 14 | 1554.7104       | 777.8588        | 518.9083        |
|         | 1275.3533       | 638.1803        | 425.7893        | 11 | E       | 13 | 1439.6835       | 720.3454        | 480.5660        |
|         | 1404.3958       | 702.7016        | 468.8035        | 12 | E       | 12 | 1310.6409       | 655.8241        | 437.5518        |
|         | 1551.4312       | 776.2193        | 517.8153        | 13 | M [147] | 11 | 1181.5983       | 591.3028        | 394.5376        |
|         | 1666.4582       | 833.7327        | 556.1576        | 14 | D       | 10 | 1034.5629       | 517.7851        | 345.5258        |
|         | 1723.4796       | 862.2435        | 575.1647        | 15 | G       | 9  | 919.5360        | 460.2716        | 307.1835        |
|         | 1820.5324       | 910.7698        | 607.5157        | 16 | P       | 8  | 862.5145        | 431.7609        | 288.1764        |
|         | 1921.5801       | 961.2937        | 641.1982        | 17 | T       | 7  | 765.4617        | 383.2345        | 255.8254        |
|         | 2034.6641       | 1017.8357       | 678.8929        | 18 | L       | 6  | 664.4141        | 332.7107        | 222.1429        |
|         | 2147.7482       | 1074.3777       | 716.5876        | 19 | L       | 5  | 551.3300        | 276.1686        | 184.4482        |
|         | 2284.8071       | 1142.9072       | 762.2739        | 20 | H       | 4  | 438.2459        | 219.6266        | 146.7535        |
|         | 2381.8599       | 1191.4336       | 794.6248        | 21 | P       | 3  | 301.1870        | 151.0971        | 101.0672        |
|         | 2438.8813       | 1219.9443       | 813.6320        | 22 | G       | 2  | 204.1343        | 102.5708        | 68.7163         |
|         |                 |                 |                 | 23 | K       | 1  | 147.1128        | 74.0600         | 49.7091         |

# Annotated spectra from Saleem et. al. 2009

K.DSSNS<sub>167</sub>EDS<sub>167</sub>EDEEM<sub>147</sub>DGPTLLHPGK.I/3

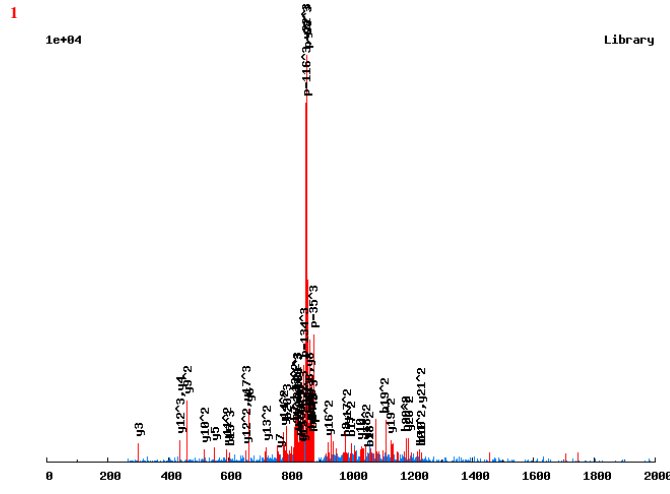

| Library | b <sup>1+</sup> | b <sup>2+</sup> | b <sup>3+</sup> | #  | AA     | #  | y <sup>1+</sup> | y <sup>2+</sup> | y <sup>3+</sup> |
|---------|-----------------|-----------------|-----------------|----|--------|----|-----------------|-----------------|-----------------|
|         | 116.0342        | 58.5207         | 39.3496         | 1  | D      | 23 |                 |                 |                 |
|         | 203.0662        | 102.0368        | 68.3603         | 2  | S      | 22 | 2549.9262       | 1275.4668       | 850.6469        |
|         | 290.0983        | 145.5528        | 97.3709         | 3  | S      | 21 | 2462.8942       | 1231.9507       | 821.6363        |
|         | 404.1412        | 202.5742        | 135.3853        | 4  | N      | 20 | 2375.8622       | 1188.4347       | 792.6256        |
|         | 571.1396        | 286.0734        | 191.0514        | 5  | S[167] | 19 | 2261.8193       | 1131.4133       | 754.6113        |
|         | 700.1822        | 350.5947        | 234.0656        | 6  | E      | 18 | 2094.8209       | 1047.9141       | 698.9452        |
|         | 815.2091        | 408.1082        | 272.4079        | 7  | D      | 17 | 1965.7783       | 983.3928        | 655.9310        |
|         | 982.2075        | 491.6074        | 328.0740        | 8  | S[167] | 16 | 1850.7514       | 925.8793        | 617.5886        |
|         | 1111.2501       | 556.1287        | 371.0882        | 9  | E      | 15 | 1683.7530       | 842.3801        | 561.9225        |
|         | 1226.2770       | 613.6421        | 409.4305        | 10 | D      | 14 | 1554.7104       | 777.8588        | 518.9083        |
|         | 1355.3196       | 678.1634        | 452.4447        | 11 | E      | 13 | 1439.6835       | 720.3454        | 480.5660        |
|         | 1484.3622       | 742.6847        | 495.4589        | 12 | E      | 12 | 1310.6409       | 655.8241        | 437.5518        |
|         | 1631.3976       | 816.2024        | 544.4707        | 13 | M[147] | 11 | 1181.5983       | 591.3028        | 394.5376        |
|         | 1746.4245       | 873.7159        | 582.8130        | 14 | D      | 10 | 1034.5629       | 517.7851        | 345.5258        |
|         | 1803.4460       | 902.2266        | 601.8202        | 15 | G      | 9  | 919.5360        | 460.2716        | 307.1835        |
|         | 1900.4987       | 950.7530        | 634.1711        | 16 | P      | 8  | 862.5145        | 431.7609        | 288.1764        |
|         | 2001.5464       | 1001.2768       | 667.8537        | 17 | T      | 7  | 765.4617        | 383.2345        | 255.8254        |
|         | 2114.6305       | 1057.8189       | 705.5483        | 18 | L      | 6  | 664.4141        | 332.7107        | 222.1429        |
|         | 2227.7145       | 1114.3609       | 743.2430        | 19 | L      | 5  | 551.3300        | 276.1686        | 184.4482        |
|         | 2364.7734       | 1182.8904       | 788.9293        | 20 | H      | 4  | 438.2459        | 219.6266        | 146.7535        |
|         | 2461.8262       | 1231.4167       | 821.2803        | 21 | P      | 3  | 301.1870        | 151.0971        | 101.0672        |
|         | 2518.8477       | 1259.9275       | 840.2874        | 22 | G      | 2  | 204.1343        | 102.5708        | 68.7163         |
|         |                 |                 |                 | 23 | K      | 1  | 147.1128        | 74.0600         | 49.7091         |

# Annotated spectra from Saleem et. al. 2009

K.DSS<sub>167</sub>PVPS<sub>167</sub>DLDEK.Y/2

0.9988

1e+04

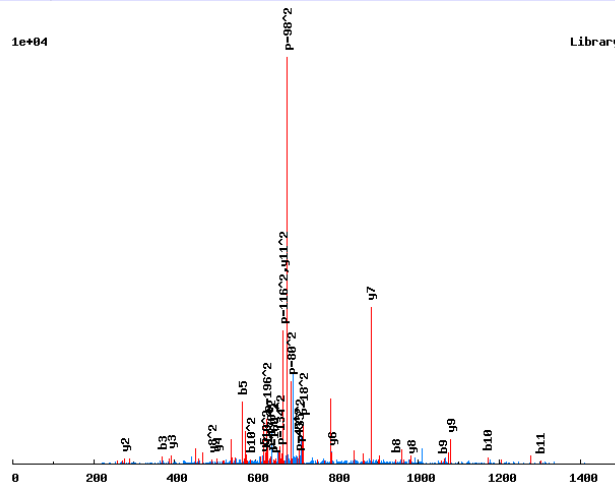

| Library | b <sup>1+</sup> | b <sup>2+</sup> | #  | AA     | #  | y <sup>1+</sup> | y <sup>2+</sup> |
|---------|-----------------|-----------------|----|--------|----|-----------------|-----------------|
|         | 116.0342        | 58.5207         | 1  | D      | 12 |                 |                 |
|         | 203.0662        | 102.0368        | 2  | S      | 11 | 1333.4960       | 667.2516        |
|         | 370.0646        | 185.5359        | 3  | S[167] | 10 | 1246.4640       | 623.7356        |
|         | 467.1174        | 234.0623        | 4  | P      | 9  | 1079.4656       | 540.2365        |
|         | 566.1858        | 283.5965        | 5  | V      | 8  | 982.4129        | 491.7101        |
|         | 663.2385        | 332.1229        | 6  | P      | 7  | 883.3445        | 442.1759        |
|         | 830.2369        | 415.6221        | 7  | S[167] | 6  | 786.2917        | 393.6495        |
|         | 945.2638        | 473.1356        | 8  | D      | 5  | 619.2933        | 310.1503        |
|         | 1058.3479       | 529.6776        | 9  | L      | 4  | 504.2664        | 252.6368        |
|         | 1173.3748       | 587.1911        | 10 | D      | 3  | 391.1823        | 196.0948        |
|         | 1302.4174       | 651.7124        | 11 | E      | 2  | 276.1554        | 138.5813        |
|         |                 |                 | 12 | K      | 1  | 147.1128        | 74.0600         |

# Annotated spectra from Saleem et. al. 2009

R.DSSQDS<sub>167</sub>S<sub>167</sub>S<sub>167</sub>S<sub>167</sub>LS<sub>167</sub>K.V/3

0.6425

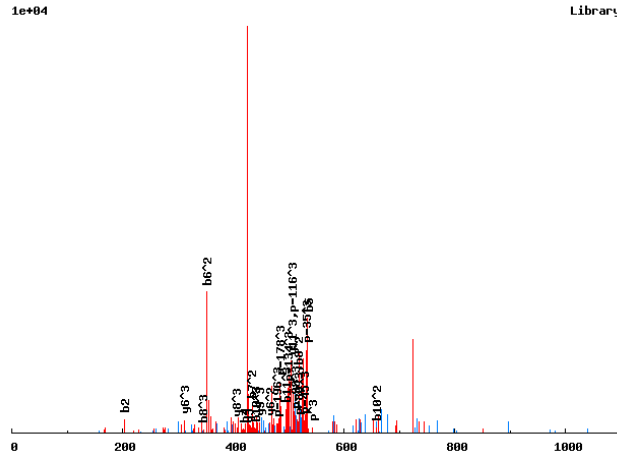

| Library | b <sup>1+</sup> | b <sup>2+</sup> | b <sup>3+</sup> | #  | AA     | #  | y <sup>1+</sup> | y <sup>2+</sup> | y <sup>3+</sup> |
|---------|-----------------|-----------------|-----------------|----|--------|----|-----------------|-----------------|-----------------|
|         | 116.0342        | 58.5207         | 39.3496         | 1  | D      | 12 |                 |                 |                 |
|         | <b>203.0662</b> | 102.0368        | 68.3603         | 2  | S      | 11 | 1512.3382       | 756.6728        | <b>504.7843</b> |
|         | 290.0983        | 145.5528        | 97.3709         | 3  | S      | 10 | 1425.3062       | 713.1567        | 475.7736        |
|         | <b>418.1569</b> | 209.5821        | 140.0571        | 4  | Q      | 9  | 1338.2742       | 669.6407        | <b>446.7629</b> |
|         | <b>533.1838</b> | 267.0955        | 178.3995        | 5  | D      | 8  | 1210.2156       | 605.6114        | <b>404.0767</b> |
|         | 700.1822        | <b>350.5947</b> | 234.0656        | 6  | S[167] | 7  | 1095.1887       | 548.0980        | 365.7344        |
|         | 867.1805        | <b>434.0939</b> | 289.7317        | 7  | S[167] | 6  | 928.1903        | <b>464.5988</b> | <b>310.0683</b> |
|         | 1034.1789       | <b>517.5931</b> | <b>345.3978</b> | 8  | S[167] | 5  | 761.1919        | 381.0996        | 254.4022        |
|         | 1201.1772       | 601.0923        | 401.0639        | 9  | S[167] | 4  | 594.1936        | 297.6004        | 198.7360        |
|         | 1314.2613       | <b>657.6343</b> | <b>438.7586</b> | 10 | L      | 3  | <b>427.1952</b> | 214.1013        | 143.0699        |
|         | 1481.2597       | 741.1335        | <b>494.4247</b> | 11 | S[167] | 2  | 314.1112        | 157.5592        | 105.3752        |
|         |                 |                 |                 | 12 | K      | 1  | 147.1128        | 74.0600         | 49.7091         |



# Annotated spectra from Saleem et. al. 2009

R.DS<sub>167</sub>S<sub>167</sub>QDSS<sub>167</sub>S<sub>167</sub>S<sub>167</sub>LS<sub>167</sub>K.V/3

0.6315

1e+04

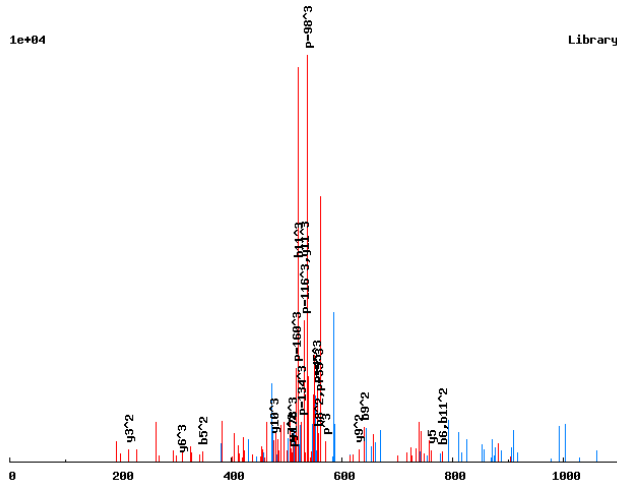

| Library | b <sup>1+</sup> | b <sup>2+</sup> | b <sup>3+</sup> | #  | AA     | #  | y <sup>1+</sup> | y <sup>2+</sup> | y <sup>3+</sup> |
|---------|-----------------|-----------------|-----------------|----|--------|----|-----------------|-----------------|-----------------|
|         | 116.0342        | 58.5207         | 39.3496         | 1  | D      | 12 |                 |                 |                 |
|         | 283.0326        | 142.0199        | 95.0157         | 2  | S[167] | 11 | 1592.3046       | 796.6559        | 531.4397        |
|         | 450.0309        | 225.5191        | 150.6818        | 3  | S[167] | 10 | 1425.3062       | 713.1567        | 475.7736        |
|         | 578.0895        | 289.5484        | 193.3680        | 4  | Q      | 9  | 1258.3079       | 629.6576        | 420.1075        |
|         | 693.1165        | 347.0619        | 231.7103        | 5  | D      | 8  | 1130.2493       | 565.6283        | 377.4213        |
|         | 780.1485        | 390.5779        | 260.7210        | 6  | S      | 7  | 1015.2223       | 508.1148        | 339.0790        |
|         | 947.1469        | 474.0771        | 316.3871        | 7  | S[167] | 6  | 928.1903        | 464.5988        | 310.0683        |
|         | 1114.1452       | 557.5762        | 372.0533        | 8  | S[167] | 5  | 761.1919        | 381.0996        | 254.4022        |
|         | 1281.1436       | 641.0754        | 427.7194        | 9  | S[167] | 4  | 594.1936        | 297.6004        | 198.7360        |
|         | 1394.2276       | 697.6175        | 465.4141        | 10 | L      | 3  | 427.1952        | 214.1013        | 143.0699        |
|         | 1561.2260       | 781.1166        | 521.0802        | 11 | S[167] | 2  | 314.1112        | 157.5592        | 105.3752        |
|         |                 |                 |                 | 12 | K      | 1  | 147.1128        | 74.0600         | 49.7091         |

# Annotated spectra from Saleem et. al. 2009

K.DSS<sub>167</sub>QTS<sub>167</sub>FTQEEFHR.I/2

0.9982

1e+04

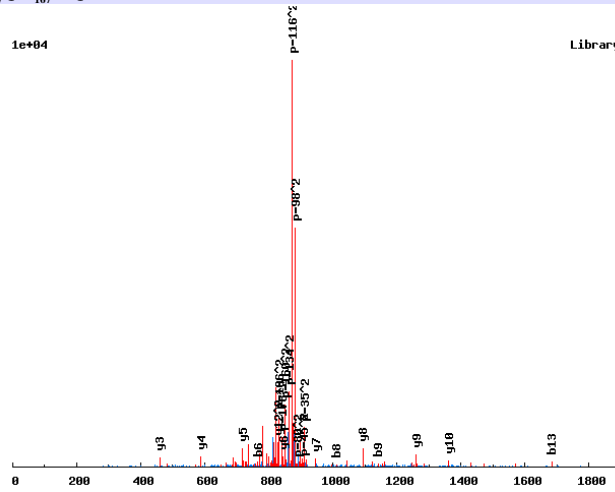

Library

| b <sup>1+</sup> | b <sup>2+</sup> | #  | AA     | #  | y <sup>1+</sup> | y <sup>2+</sup> |
|-----------------|-----------------|----|--------|----|-----------------|-----------------|
| 116.0342        | 58.5207         | 1  | D      | 14 |                 |                 |
| 203.0662        | 102.0368        | 2  | S      | 13 | 1743.6411       | 872.3242        |
| 370.0646        | 185.5359        | 3  | S[167] | 12 | 1656.6091       | 828.8082        |
| 498.1232        | 249.5652        | 4  | Q      | 11 | 1489.6107       | 745.3090        |
| 599.1709        | 300.0891        | 5  | T      | 10 | 1361.5522       | 681.2797        |
| 766.1692        | 383.5883        | 6  | S[167] | 9  | 1260.5045       | 630.7559        |
| 913.2376        | 457.1225        | 7  | F      | 8  | 1093.5061       | 547.2567        |
| 1014.2853       | 507.6463        | 8  | T      | 7  | 946.4377        | 473.7225        |
| 1142.3439       | 571.6756        | 9  | Q      | 6  | 845.3900        | 423.1987        |
| 1271.3865       | 636.1969        | 10 | E      | 5  | 717.3315        | 359.1694        |
| 1400.4291       | 700.7182        | 11 | E      | 4  | 588.2889        | 294.6481        |
| 1547.4975       | 774.2524        | 12 | F      | 3  | 459.2463        | 230.1268        |
| 1684.5564       | 842.7818        | 13 | H      | 2  | 312.1779        | 156.5926        |
|                 |                 | 14 | R      | 1  | 175.1190        | 88.0631         |

# Annotated spectra from Saleem et. al. 2009

K.DSSSS<sub>167</sub>S<sub>167</sub>VGK<sub>136</sub>G/2

0.6885

1e+04

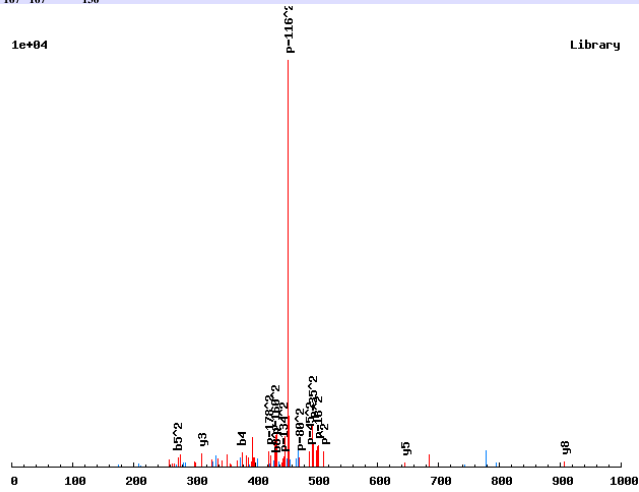

| Library | b <sup>1+</sup> | b <sup>2+</sup> | # | AA     | # | y <sup>1+</sup> | y <sup>2+</sup> |
|---------|-----------------|-----------------|---|--------|---|-----------------|-----------------|
|         | 116.0342        | 58.5207         | 1 | D      | 9 |                 |                 |
|         | 203.0662        | 102.0368        | 2 | S      | 8 | 906.3097        | 453.6585        |
|         | 290.0983        | 145.5528        | 3 | S      | 7 | 819.2777        | 410.1425        |
|         | 377.1303        | 189.0688        | 4 | S      | 6 | 732.2456        | 366.6265        |
|         | 544.1287        | 272.5680        | 5 | S[167] | 5 | 645.2136        | 323.1104        |
|         | 711.1270        | 356.0672        | 6 | S[167] | 4 | 478.2152        | 239.6113        |
|         | 810.1954        | 405.6014        | 7 | V      | 3 | 311.2169        | 156.1121        |
|         | 867.2169        | 434.1121        | 8 | G      | 2 | 212.1485        | 106.5779        |
|         |                 |                 | 9 | K[136] | 1 | 155.1270        | 78.0671         |

# Annotated spectra from Saleem et. al. 2009

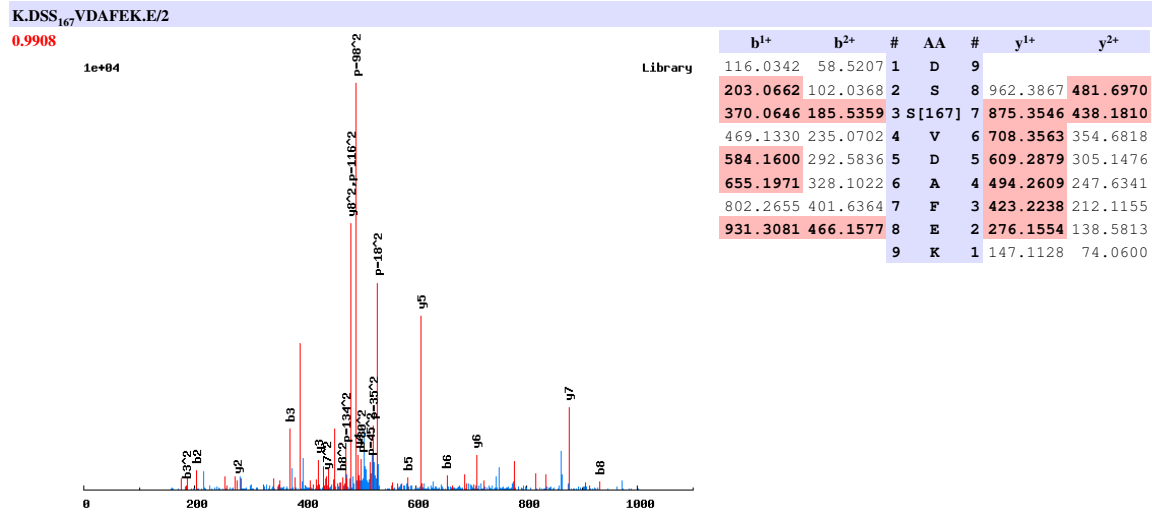

# Annotated spectra from Saleem et. al. 2009

K.DSVDDNENS<sub>167</sub>DDGLDIPK<sub>136</sub>N/2

0.9999

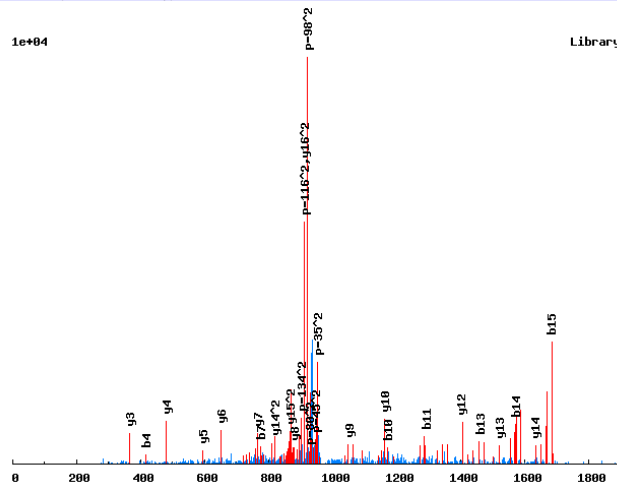

| Library | b <sup>1+</sup> | b <sup>2+</sup> | #  | AA     | #  | y <sup>1+</sup> | y <sup>2+</sup> |
|---------|-----------------|-----------------|----|--------|----|-----------------|-----------------|
|         | 116.0342        | 58.5207         | 1  | D      | 17 |                 |                 |
|         | 203.0662        | 102.0368        | 2  | S      | 16 | 1820.7313       | 910.8693        |
|         | 302.1347        | 151.5710        | 3  | V      | 15 | 1733.6993       | 867.3533        |
|         | 417.1616        | 209.0844        | 4  | D      | 14 | 1634.6308       | 817.8191        |
|         | 532.1885        | 266.5979        | 5  | D      | 13 | 1519.6039       | 760.3056        |
|         | 646.2315        | 323.6194        | 6  | N      | 12 | 1404.5770       | 702.7921        |
|         | 775.2741        | 388.1407        | 7  | E      | 11 | 1290.5340       | 645.7707        |
|         | 889.3170        | 445.1621        | 8  | N      | 10 | 1161.4914       | 581.2494        |
|         | 1056.3154       | 528.6613        | 9  | S[167] | 9  | 1047.4485       | 524.2279        |
|         | 1171.3423       | 586.1748        | 10 | D      | 8  | 880.4502        | 440.7287        |
|         | 1286.3692       | 643.6883        | 11 | D      | 7  | 765.4232        | 383.2152        |
|         | 1343.3907       | 672.1990        | 12 | G      | 6  | 650.3963        | 325.7018        |
|         | 1456.4748       | 728.7410        | 13 | L      | 5  | 593.3748        | 297.1910        |
|         | 1571.5017       | 786.2545        | 14 | D      | 4  | 480.2908        | 240.6490        |
|         | 1684.5858       | 842.7965        | 15 | I      | 3  | 365.2638        | 183.1355        |
|         | 1781.6385       | 891.3229        | 16 | P      | 2  | 252.1798        | 126.5935        |
|         |                 |                 | 17 | K[136] | 1  | 155.1270        | 78.0671         |

# Annotated spectra from Saleem et. al. 2009

R.DTK<sub>136</sub>EPDS<sub>167</sub>ENIT<sub>181</sub>PSVSPAIDDR<sub>166</sub>K/3

0.7531

1e+04

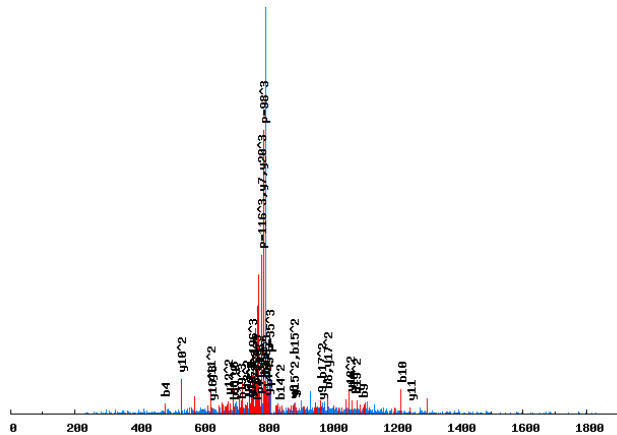

| Library | b <sup>1+</sup>  | b <sup>2+</sup>  | b <sup>3+</sup> | #  | AA     | #  | y <sup>1+</sup>  | y <sup>2+</sup>  | y <sup>3+</sup> |
|---------|------------------|------------------|-----------------|----|--------|----|------------------|------------------|-----------------|
|         | 116.0342         | 58.5207          | 39.3496         | 1  | D      | 21 |                  |                  |                 |
|         | 217.0819         | 109.0446         | 73.0322         | 2  | T      | 20 | 2349.0013        | 1175.0043        | <b>783.6720</b> |
|         | 353.1911         | 177.0992         | 118.4019        | 3  | K[136] | 19 | 2247.9537        | 1124.4805        | <b>749.9894</b> |
|         | <b>482.2336</b>  | 241.6205         | 161.4161        | 4  | E      | 18 | 2111.8445        | <b>1056.4259</b> | 704.6197        |
|         | 579.2864         | 290.1468         | 193.7670        | 5  | P      | 17 | 1982.8019        | <b>991.9046</b>  | 661.6055        |
|         | <b>694.3133</b>  | 347.6603         | 232.1093        | 6  | D      | 16 | 1885.7492        | 943.3782         | <b>629.2546</b> |
|         | 861.3117         | 431.1595         | 287.7754        | 7  | S[167] | 15 | 1770.7222        | <b>885.8647</b>  | 590.9123        |
|         | <b>990.3543</b>  | 495.6808         | 330.7896        | 8  | E      | 14 | 1603.7238        | <b>802.3656</b>  | 535.2461        |
|         | <b>1104.3972</b> | 552.7023         | 368.8039        | 9  | N      | 13 | 1474.6813        | <b>737.8443</b>  | 492.2319        |
|         | <b>1217.4813</b> | 609.2443         | 406.4986        | 10 | I      | 12 | 1360.6383        | <b>680.8228</b>  | 454.2176        |
|         | 1398.4953        | <b>699.7513</b>  | 466.8366        | 11 | T[181] | 11 | <b>1247.5543</b> | <b>624.2808</b>  | 416.5229        |
|         | 1495.5481        | <b>748.2777</b>  | 499.1875        | 12 | P      | 10 | <b>1066.5403</b> | <b>533.7738</b>  | 356.1849        |
|         | 1582.5801        | <b>791.7937</b>  | 528.1982        | 13 | S      | 9  | <b>969.4875</b>  | 485.2474         | 323.8340        |
|         | 1681.6485        | <b>841.3279</b>  | 561.2210        | 14 | V      | 8  | <b>882.4555</b>  | 441.7314         | 294.8233        |
|         | 1768.6805        | <b>884.8439</b>  | 590.2317        | 15 | S      | 7  | <b>783.3871</b>  | 392.1972         | 261.8005        |
|         | 1865.7333        | 933.3703         | 622.5826        | 16 | P      | 6  | <b>696.3550</b>  | 348.6812         | 232.7899        |
|         | 1936.7704        | <b>968.8888</b>  | 646.2617        | 17 | A      | 5  | 599.3023         | 300.1548         | 200.4389        |
|         | 2049.8545        | 1025.4309        | 683.9563        | 18 | I      | 4  | 528.2652         | 264.6362         | 176.7599        |
|         | 2164.8814        | <b>1082.9443</b> | <b>722.2987</b> | 19 | D      | 3  | 415.1811         | 208.0942         | 139.0652        |
|         | 2279.9083        | 1140.4578        | 760.6410        | 20 | D      | 2  | 300.1542         | 150.5807         | 100.7229        |
|         |                  |                  |                 | 21 | R[166] | 1  | 185.1272         | 93.0672          | 62.3806         |

# Annotated spectra from Saleem et. al. 2009

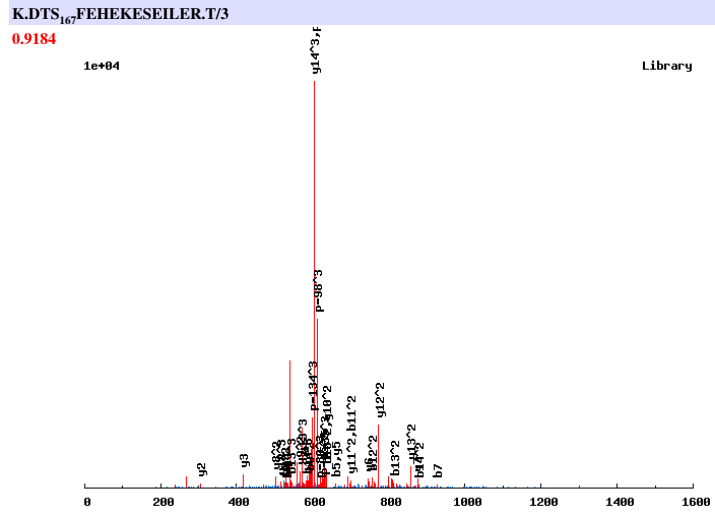

| Library | b <sup>1+</sup> | b <sup>2+</sup> | b <sup>3+</sup> | #  | AA     | #  | y <sup>1+</sup> | y <sup>2+</sup> | y <sup>3+</sup> |
|---------|-----------------|-----------------|-----------------|----|--------|----|-----------------|-----------------|-----------------|
|         | 116.0342        | 58.5207         | 39.3496         | 1  | D      | 15 |                 |                 |                 |
|         | 217.0819        | 109.0446        | 73.0322         | 2  | T      | 14 | 1813.8004       | 907.4038        | 605.2716        |
|         | 384.0803        | 192.5438        | 128.6983        | 3  | S[167] | 13 | 1712.7527       | 856.8800        | 571.5891        |
|         | 531.1487        | 266.0780        | 177.7211        | 4  | F      | 12 | 1545.7543       | 773.3808        | 515.9230        |
|         | 660.1913        | 330.5993        | 220.7353        | 5  | E      | 11 | 1398.6859       | 699.8466        | 466.9002        |
|         | 797.2502        | 399.1287        | 266.4216        | 6  | H      | 10 | 1269.6433       | 635.3253        | 423.8860        |
|         | 926.2928        | 463.6500        | 309.4358        | 7  | E      | 9  | 1132.5844       | 566.7958        | 378.1997        |
|         | 1054.3877       | 527.6975        | 352.1341        | 8  | K      | 8  | 1003.5418       | 502.2746        | 335.1855        |
|         | 1183.4303       | 592.2188        | 395.1483        | 9  | E      | 7  | 875.4469        | 438.2271        | 292.4871        |
|         | 1270.4623       | 635.7348        | 424.1590        | 10 | S      | 6  | 746.4043        | 373.7058        | 249.4729        |
|         | 1399.5049       | 700.2561        | 467.1732        | 11 | E      | 5  | 659.3723        | 330.1898        | 220.4623        |
|         | 1512.5890       | 756.7981        | 504.8679        | 12 | I      | 4  | 530.3297        | 265.6685        | 177.4481        |
|         | 1625.6731       | 813.3402        | 542.5625        | 13 | L      | 3  | 417.2456        | 209.1264        | 139.7534        |
|         | 1754.7156       | 877.8615        | 585.5767        | 14 | E      | 2  | 304.1615        | 152.5844        | 102.0587        |
|         |                 |                 |                 | 15 | R      | 1  | 175.1190        | 88.0631         | 59.0445         |

# Annotated spectra from Saleem et. al. 2009

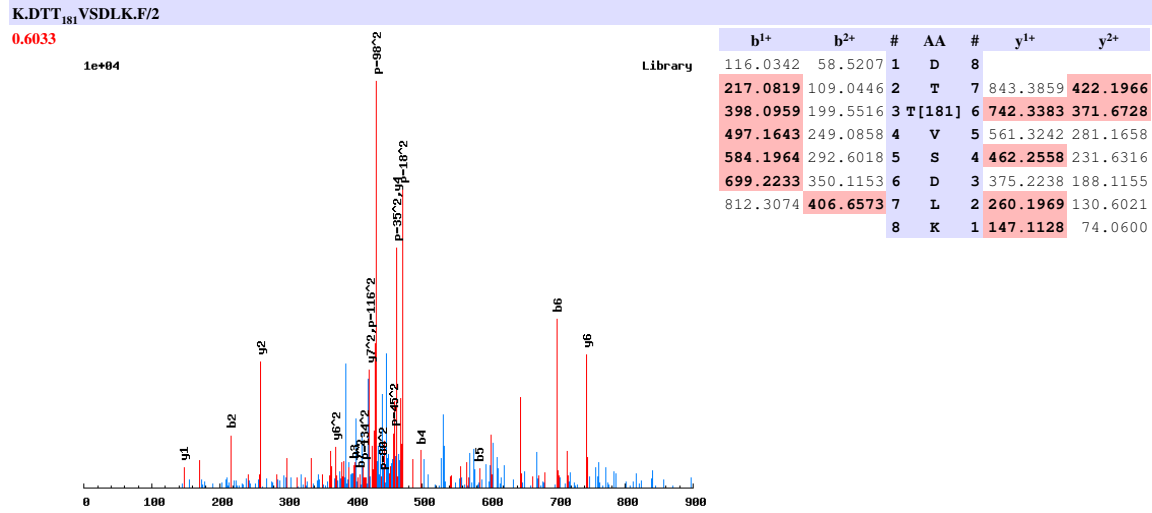



# Annotated spectra from Saleem et. al. 2009

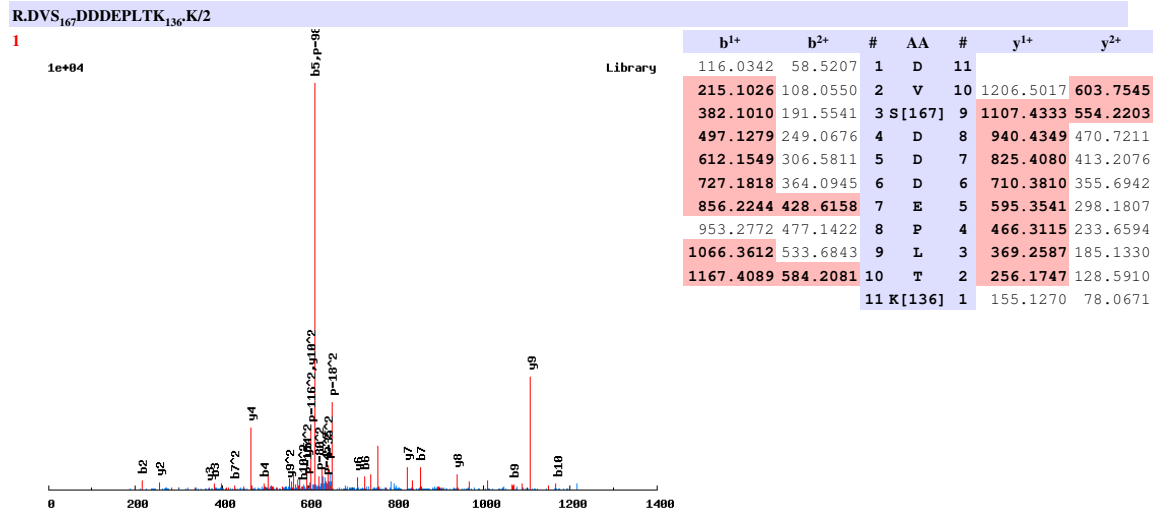

# Annotated spectra from Saleem et. al. 2009

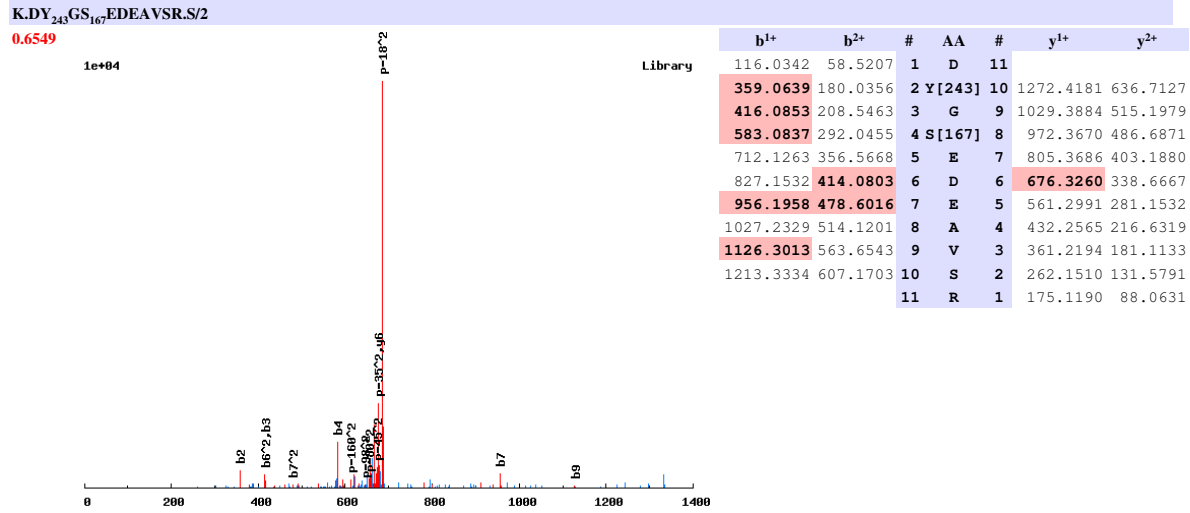

# Annotated spectra from Saleem et. al. 2009

K.EADATPDDRRS<sub>167</sub>IS<sub>167</sub>SNSNK.I/2

0.8001

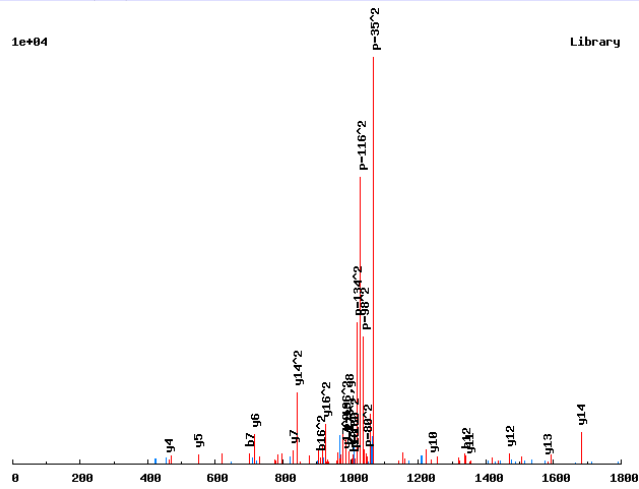

| Library | b <sup>1+</sup> | b <sup>2+</sup> | #  | AA     | #  | y <sup>1+</sup> | y <sup>2+</sup> |
|---------|-----------------|-----------------|----|--------|----|-----------------|-----------------|
|         | 130.0499        | 65.5286         | 1  | E      | 19 |                 |                 |
|         | 201.0870        | 101.0471        | 2  | A      | 18 | 2039.7591       | 1020.3832       |
|         | 316.1139        | 158.5606        | 3  | D      | 17 | 1968.7220       | 984.8646        |
|         | 387.1510        | 194.0792        | 4  | A      | 16 | 1853.6950       | 927.3511        |
|         | 488.1987        | 244.6030        | 5  | T      | 15 | 1782.6579       | 891.8326        |
|         | 585.2515        | 293.1294        | 6  | P      | 14 | 1681.6102       | 841.3088        |
|         | 700.2784        | 350.6428        | 7  | D      | 13 | 1584.5575       | 792.7824        |
|         | 815.3053        | 408.1563        | 8  | D      | 12 | 1469.5305       | 735.2689        |
|         | 930.3323        | 465.6698        | 9  | D      | 11 | 1354.5036       | 677.7554        |
|         | 1086.4334       | 543.7203        | 10 | R      | 10 | 1239.4766       | 620.2420        |
|         | 1173.4654       | 587.2364        | 11 | S      | 9  | 1083.3755       | 542.1914        |
|         | 1340.4638       | 670.7355        | 12 | S[167] | 8  | 996.3435        | 498.6754        |
|         | 1453.5479       | 727.2776        | 13 | I      | 7  | 829.3451        | 415.1762        |
|         | 1620.5462       | 810.7767        | 14 | S[167] | 6  | 716.2611        | 358.6342        |
|         | 1707.5782       | 854.2928        | 15 | S      | 5  | 549.2627        | 275.1350        |
|         | 1821.6212       | 911.3142        | 16 | N      | 4  | 462.2307        | 231.6190        |
|         | 1908.6532       | 954.8302        | 17 | S      | 3  | 348.1878        | 174.5975        |
|         | 2022.6961       | 1011.8517       | 18 | N      | 2  | 261.1557        | 131.0815        |
|         |                 |                 | 19 | K      | 1  | 147.1128        | 74.0600         |

# Annotated spectra from Saleem et. al. 2009

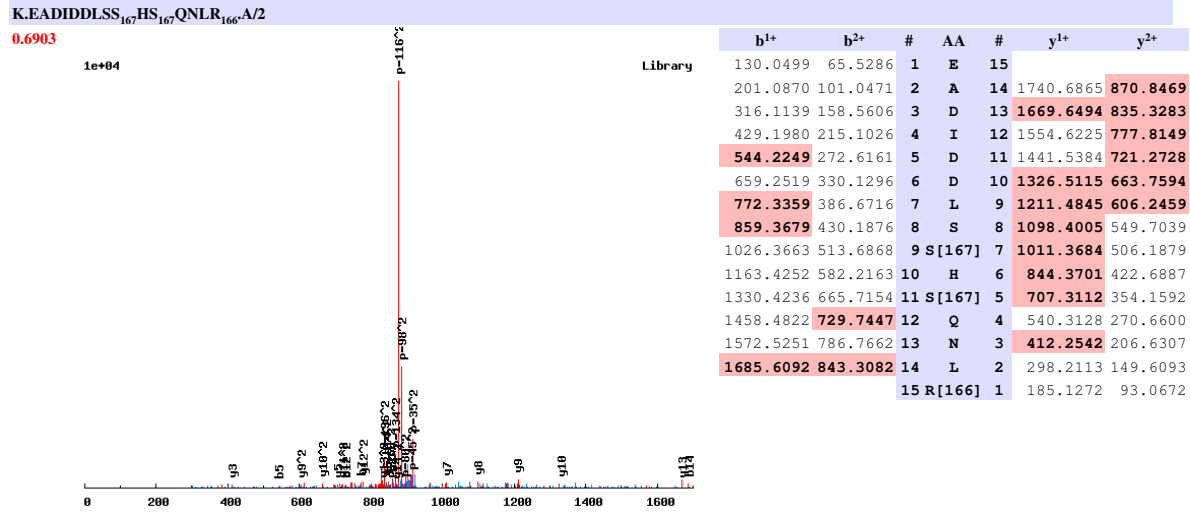

# Annotated spectra from Saleem et. al. 2009

R.EAMAISEHNVKDDS<sub>167</sub>DLS<sub>167</sub>DKDNEYDEEQPR.Q/3

0.931

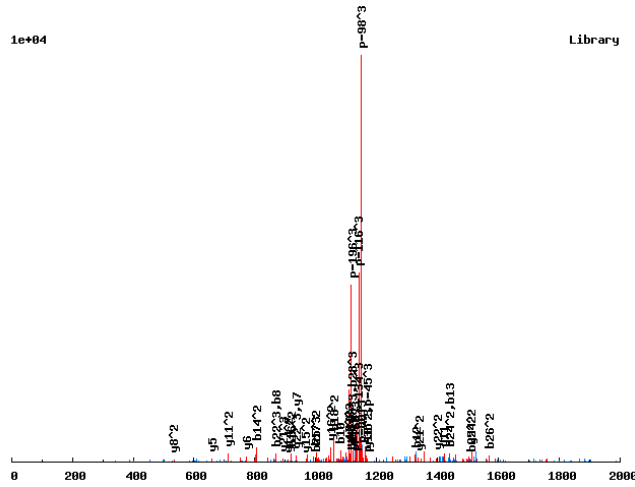

| Library | b <sup>1+</sup> | b <sup>2+</sup> | b <sup>3+</sup> | #  | AA     | #  | y <sup>1+</sup> | y <sup>2+</sup> | y <sup>3+</sup> |
|---------|-----------------|-----------------|-----------------|----|--------|----|-----------------|-----------------|-----------------|
|         | 130.0499        | 65.5286         | 44.0215         | 1  | E      | 29 |                 |                 |                 |
|         | 201.0870        | 101.0471        | 67.7005         | 2  | A      | 28 | 3410.3403       | 1705.6738       | 1137.4516       |
|         | 332.1275        | 166.5674        | 111.3807        | 3  | M      | 27 | 3339.3032       | 1670.1552       | 1113.7726       |
|         | 403.1646        | 202.0859        | 135.0597        | 4  | A      | 26 | 3208.2627       | 1604.6350       | 1070.0924       |
|         | 516.2486        | 258.6280        | 172.7544        | 5  | I      | 25 | 3137.2256       | 1569.1164       | 1046.4134       |
|         | 603.2807        | 302.1440        | 201.7651        | 6  | S      | 24 | 3024.1415       | 1512.5744       | 1008.7187       |
|         | 732.3233        | 366.6653        | 244.7793        | 7  | E      | 23 | 2937.1095       | 1469.0584       | 979.7080        |
|         | 869.3822        | 435.1947        | 290.4656        | 8  | H      | 22 | 2808.0669       | 1404.5371       | 936.6938        |
|         | 983.4251        | 492.2162        | 328.4799        | 9  | N      | 21 | 2671.0080       | 1336.0076       | 891.0075        |
|         | 1082.4935       | 541.7504        | 361.5027        | 10 | V      | 20 | 2556.9651       | 1278.9862       | 852.9932        |
|         | 1210.5885       | 605.7979        | 404.2010        | 11 | K      | 19 | 2457.8967       | 1229.4520       | 819.9704        |
|         | 1325.6154       | 663.3113        | 442.5433        | 12 | D      | 18 | 2329.8017       | 1165.4045       | 777.2721        |
|         | 1440.6423       | 720.8248        | 480.8856        | 13 | D      | 17 | 2214.7748       | 1107.8910       | 738.9298        |
|         | 1607.6407       | 804.3240        | 536.5518        | 14 | S[167] | 16 | 2099.7478       | 1050.3776       | 700.5875        |
|         | 1722.6677       | 861.8375        | 574.8941        | 15 | D      | 15 | 1932.7495       | 966.8784        | 644.9213        |
|         | 1835.7517       | 918.3795        | 612.5888        | 16 | L      | 14 | 1817.7225       | 909.3649        | 606.5790        |
|         | 2002.7501       | 1001.8787       | 668.2549        | 17 | S[167] | 13 | 1704.6385       | 852.8229        | 568.8843        |
|         | 2117.7770       | 1059.3921       | 706.5972        | 18 | D      | 12 | 1537.6401       | 769.3237        | 513.2182        |
|         | 2245.8720       | 1123.4396       | 749.2955        | 19 | K      | 11 | 1422.6132       | 711.8102        | 474.8759        |
|         | 2360.8989       | 1180.9531       | 787.6378        | 20 | D      | 10 | 1294.5182       | 647.7627        | 432.1776        |
|         | 2474.9418       | 1237.9746       | 825.6521        | 21 | N      | 9  | 1179.4913       | 590.2493        | 393.8353        |
|         | 2603.9844       | 1302.4959       | 868.6663        | 22 | E      | 8  | 1065.4483       | 533.2278        | 355.8210        |
|         | 2767.0478       | 1384.0275       | 923.0208        | 23 | Y      | 7  | 936.4057        | 468.7065        | 312.8068        |
|         | 2882.0747       | 1441.5410       | 961.3631        | 24 | D      | 6  | 773.3424        | 387.1748        | 258.4523        |
|         | 3011.1173       | 1506.0623       | 1004.3773       | 25 | E      | 5  | 658.3155        | 329.6614        | 220.1100        |
|         | 3140.1599       | 1570.5836       | 1047.3915       | 26 | E      | 4  | 529.2729        | 265.1401        | 177.0958        |
|         | 3268.2185       | 1634.6129       | 1090.0777       | 27 | Q      | 3  | 400.2303        | 200.6188        | 134.0816        |
|         | 3365.2712       | 1683.1393       | 1122.4286       | 28 | P      | 2  | 272.1717        | 136.5895        | 91.3954         |
|         |                 |                 |                 | 29 | R      | 1  | 175.1190        | 88.0631         | 59.0445         |

# Annotated spectra from Saleem et. al. 2009

R.EAQS<sub>167</sub>EES<sub>167</sub>EDEESGSKENGEPLSYDPLGNLIR.-/3

0.9817

1e+04

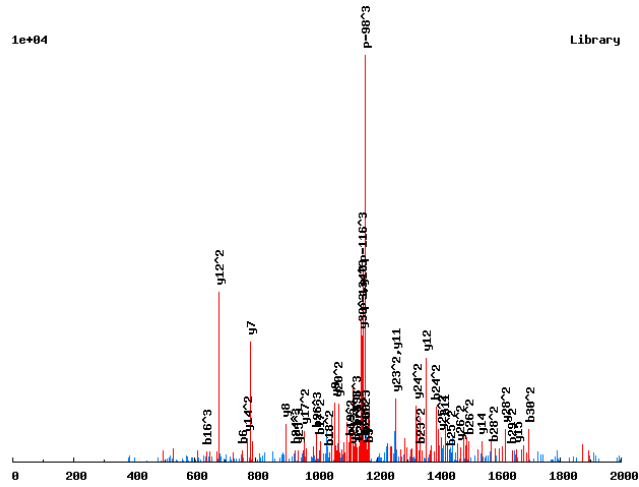

| Library | b <sup>1+</sup> | b <sup>2+</sup> | b <sup>3+</sup> | #  | AA     | #  | y <sup>1+</sup> | y <sup>2+</sup> | y <sup>3+</sup> |
|---------|-----------------|-----------------|-----------------|----|--------|----|-----------------|-----------------|-----------------|
|         | 130.0499        | 65.5286         | 44.0215         | 1  | E      | 31 |                 |                 |                 |
|         | 201.0870        | 101.0471        | 67.7005         | 2  | A      | 30 | 3439.4098       | 1720.2085       | 1147.1414       |
|         | 329.1456        | 165.0764        | 110.3867        | 3  | Q      | 29 | 3368.3726       | 1684.6900       | 1123.4624       |
|         | 496.1439        | 248.5756        | 166.0528        | 4  | S[167] | 28 | 3240.3141       | 1620.6607       | 1080.7762       |
|         | 625.1865        | 313.0969        | 209.0670        | 5  | E      | 27 | 3073.3157       | 1537.1615       | 1025.1101       |
|         | 754.2291        | 377.6182        | 252.0812        | 6  | E      | 26 | 2944.2731       | 1472.6402       | 982.0959        |
|         | 921.2275        | 461.1174        | 307.7473        | 7  | S[167] | 25 | 2815.2305       | 1408.1189       | 939.0817        |
|         | 1050.2701       | 525.6387        | 350.7615        | 8  | E      | 24 | 2648.2322       | 1324.6197       | 883.4156        |
|         | 1165.2970       | 583.1521        | 389.1039        | 9  | D      | 23 | 2519.1896       | 1260.0984       | 840.4014        |
|         | 1294.3396       | 647.6734        | 432.1180        | 10 | E      | 22 | 2404.1626       | 1202.5850       | 802.0591        |
|         | 1423.3822       | 712.1947        | 475.1322        | 11 | E      | 21 | 2275.1200       | 1138.0637       | 759.0449        |
|         | 1510.4142       | 755.7107        | 504.1429        | 12 | S      | 20 | 2146.0774       | 1073.5424       | 716.0307        |
|         | 1567.4357       | 784.2215        | 523.1501        | 13 | G      | 19 | 2059.0454       | 1030.0263       | 687.0200        |
|         | 1654.4677       | 827.7375        | 552.1608        | 14 | S      | 18 | 2002.0240       | 1001.5156       | 668.0128        |
|         | 1782.5627       | 891.7850        | 594.8591        | 15 | K      | 17 | 1914.9919       | 957.9996        | 639.0022        |
|         | 1911.6052       | 956.3063        | 637.8733        | 16 | E      | 16 | 1786.8970       | 893.9521        | 596.3038        |
|         | 2025.6482       | 1013.3277       | 675.8876        | 17 | N      | 15 | 1657.8544       | 829.4308        | 553.2896        |
|         | 2082.6696       | 1041.8385       | 694.8947        | 18 | G      | 14 | 1543.8114       | 772.4094        | 515.2753        |
|         | 2211.7122       | 1106.3598       | 737.9089        | 19 | E      | 13 | 1486.7900       | 743.8986        | 496.2682        |
|         | 2308.7650       | 1154.8861       | 770.2598        | 20 | P      | 12 | 1357.7474       | 679.3773        | 453.2540        |
|         | 2421.8490       | 1211.4282       | 807.9545        | 21 | L      | 11 | 1260.6946       | 630.8510        | 420.9031        |
|         | 2508.8811       | 1254.9442       | 836.9652        | 22 | S      | 10 | 1147.6106       | 574.3089        | 383.2084        |
|         | 2671.9444       | 1336.4758       | 891.3197        | 23 | Y      | 9  | 1060.5786       | 530.7929        | 354.1977        |
|         | 2786.9713       | 1393.9893       | 929.6620        | 24 | D      | 8  | 897.5152        | 449.2613        | 299.8433        |
|         | 2884.0241       | 1442.5157       | 962.0129        | 25 | P      | 7  | 782.4883        | 391.7478        | 261.5009        |
|         | 2997.1082       | 1499.0577       | 999.7076        | 26 | L      | 6  | 685.4355        | 343.2214        | 229.1500        |
|         | 3054.1296       | 1527.5685       | 1018.7147       | 27 | G      | 5  | 572.3515        | 286.6794        | 191.4553        |
|         | 3168.1726       | 1584.5899       | 1056.7290       | 28 | N      | 4  | 515.3300        | 258.1686        | 172.4482        |
|         | 3281.2566       | 1641.1319       | 1094.4237       | 29 | L      | 3  | 401.2871        | 201.1472        | 134.4339        |
|         | 3394.3407       | 1697.6740       | 1132.1184       | 30 | I      | 2  | 288.2030        | 144.6051        | 96.7392         |
|         |                 |                 |                 | 31 | R      | 1  | 175.1190        | 88.0631         | 59.0445         |

# Annotated spectra from Saleem et. al. 2009

R.EAS<sub>167</sub>KS<sub>167</sub>PISSFVNDYR.S/2

0.9983

1e+04

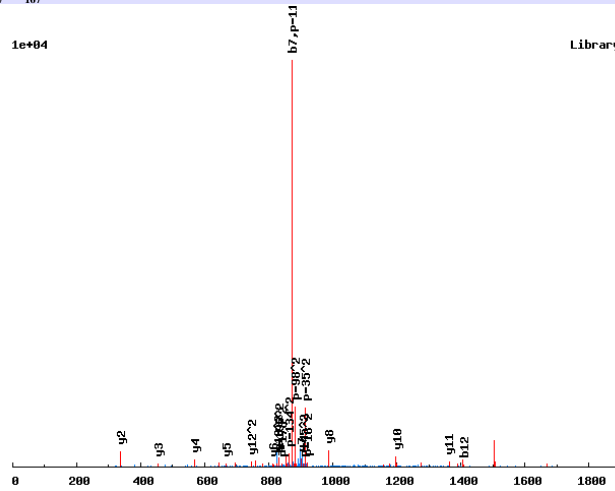

| Library | b <sup>1+</sup> | b <sup>2+</sup> | #  | AA     | #  | y <sup>1+</sup> | y <sup>2+</sup> |
|---------|-----------------|-----------------|----|--------|----|-----------------|-----------------|
|         | 130.0499        | 65.5286         | 1  | E      | 15 |                 |                 |
|         | 201.0870        | 101.0471        | 2  | A      | 14 | 1730.7186       | 865.8630        |
|         | 368.0853        | 184.5463        | 3  | S[167] | 13 | 1659.6815       | 830.3444        |
|         | 496.1803        | 248.5938        | 4  | K      | 12 | 1492.6832       | 746.8452        |
|         | 663.1787        | 332.0930        | 5  | S[167] | 11 | 1364.5882       | 682.7977        |
|         | 760.2314        | 380.6194        | 6  | P      | 10 | 1197.5899       | 599.2986        |
|         | 873.3155        | 437.1614        | 7  | I      | 9  | 1100.5371       | 550.7722        |
|         | 960.3475        | 480.6774        | 8  | S      | 8  | 987.4530        | 494.2302        |
|         | 1047.3795       | 524.1934        | 9  | S      | 7  | 900.4210        | 450.7141        |
|         | 1194.4480       | 597.7276        | 10 | F      | 6  | 813.3890        | 407.1981        |
|         | 1293.5164       | 647.2618        | 11 | V      | 5  | 666.3206        | 333.6639        |
|         | 1407.5593       | 704.2833        | 12 | N      | 4  | 567.2522        | 284.1297        |
|         | 1522.5862       | 761.7968        | 13 | D      | 3  | 453.2092        | 227.1082        |
|         | 1685.6496       | 843.3284        | 14 | Y      | 2  | 338.1823        | 169.5948        |
|         |                 |                 | 15 | R      | 1  | 175.1190        | 88.0631         |

# Annotated spectra from Saleem et. al. 2009

R.EAS<sub>167</sub>LST<sub>181</sub>PPNEK.F/2

0.9937

1e+04

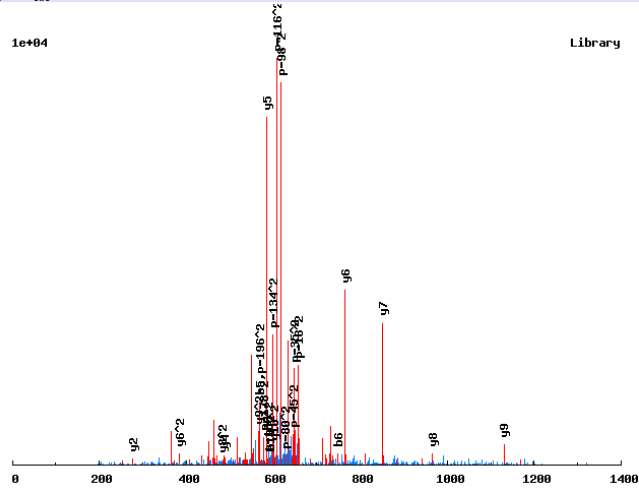

| Library | b <sup>1+</sup> | b <sup>2+</sup> | #  | AA     | #  | y <sup>1+</sup> | y <sup>2+</sup> |
|---------|-----------------|-----------------|----|--------|----|-----------------|-----------------|
|         | 130.0499        | 65.5286         | 1  | E      | 11 |                 |                 |
|         | 201.0870        | 101.0471        | 2  | A      | 10 | 1203.4694       | 602.2383        |
|         | 368.0853        | 184.5463        | 3  | S[167] | 9  | 1132.4323       | 566.7198        |
|         | 481.1694        | 241.0883        | 4  | L      | 8  | 965.4339        | 483.2206        |
|         | 568.2014        | 284.6044        | 5  | S      | 7  | 852.3499        | 426.6786        |
|         | 749.2154        | 375.1114        | 6  | T[181] | 6  | 765.3179        | 383.1626        |
|         | 846.2682        | 423.6377        | 7  | P      | 5  | 584.3038        | 292.6556        |
|         | 943.3210        | 472.1641        | 8  | P      | 4  | 487.2511        | 244.1292        |
|         | 1057.3639       | 529.1856        | 9  | N      | 3  | 390.1983        | 195.6028        |
|         | 1186.4065       | 593.7069        | 10 | E      | 2  | 276.1554        | 138.5813        |
|         |                 |                 | 11 | K      | 1  | 147.1128        | 74.0600         |



# Annotated spectra from Saleem et. al. 2009

R.E<sub>111</sub>AS<sub>167</sub>PAPTGSHSLTK<sub>136</sub>G/2

0.878

1e+04

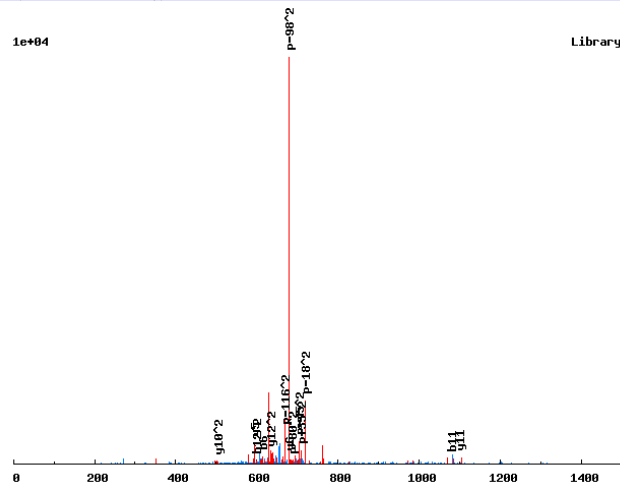

| Library | b <sup>1+</sup> | b <sup>2+</sup> | #  | AA     | #  | y <sup>1+</sup> | y <sup>2+</sup> |
|---------|-----------------|-----------------|----|--------|----|-----------------|-----------------|
|         | 112.0393        | 56.5233         | 1  | E[111] | 14 |                 |                 |
|         | 183.0764        | 92.0418         | 2  | A      | 13 | 1341.6289       | 671.3181        |
|         | 350.0748        | 175.5410        | 3  | S[167] | 12 | 1270.5918       | 635.7996        |
|         | 447.1275        | 224.0674        | 4  | P      | 11 | 1103.5935       | 552.3004        |
|         | 518.1646        | 259.5860        | 5  | A      | 10 | 1006.5407       | 503.7740        |
|         | 615.2174        | 308.1123        | 6  | P      | 9  | 935.5036        | 468.2554        |
|         | 716.2651        | 358.6362        | 7  | T      | 8  | 838.4508        | 419.7291        |
|         | 773.2865        | 387.1469        | 8  | G      | 7  | 737.4032        | 369.2052        |
|         | 860.3186        | 430.6629        | 9  | S      | 6  | 680.3817        | 340.6945        |
|         | 997.3775        | 499.1924        | 10 | H      | 5  | 593.3497        | 297.1785        |
|         | 1084.4095       | 542.7084        | 11 | S      | 4  | 456.2908        | 228.6490        |
|         | 1197.4936       | 599.2504        | 12 | L      | 3  | 369.2587        | 185.1330        |
|         | 1298.5413       | 649.7743        | 13 | T      | 2  | 256.1747        | 128.5910        |
|         |                 |                 | 14 | K[136] | 1  | 155.1270        | 78.0671         |

# Annotated spectra from Saleem et. al. 2009

K.EAS<sub>167</sub>PAQYSHS<sub>167</sub>LHER<sub>166</sub>T/2

0.9932

1e+04

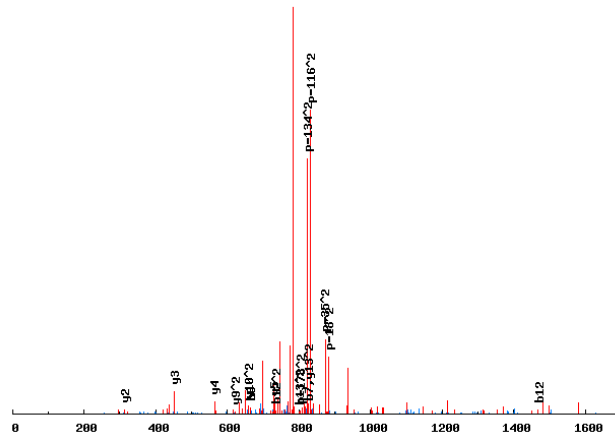

| Library | b <sup>1+</sup> | b <sup>2+</sup> | #  | AA     | #  | y <sup>1+</sup> | y <sup>2+</sup> |
|---------|-----------------|-----------------|----|--------|----|-----------------|-----------------|
|         | 130.0499        | 65.5286         | 1  | E      | 14 |                 |                 |
|         | 201.0870        | 101.0471        | 2  | A      | 13 | 1652.6493       | 826.8283        |
|         | 368.0853        | 184.5463        | 3  | S[167] | 12 | 1581.6122       | 791.3098        |
|         | 465.1381        | 233.0727        | 4  | P      | 11 | 1414.6139       | 707.8106        |
|         | 536.1752        | 268.5912        | 5  | A      | 10 | 1317.5611       | 659.2842        |
|         | 664.2338        | 332.6205        | 6  | Q      | 9  | 1246.5240       | 623.7656        |
|         | 827.2971        | 414.1522        | 7  | Y      | 8  | 1118.4654       | 559.7363        |
|         | 914.3292        | 457.6682        | 8  | S      | 7  | 955.4021        | 478.2047        |
|         | 1051.3881       | 526.1977        | 9  | H      | 6  | 868.3701        | 434.6887        |
|         | 1218.3864       | 609.6969        | 10 | S[167] | 5  | 731.3111        | 366.1592        |
|         | 1331.4705       | 666.2389        | 11 | L      | 4  | 564.3128        | 282.6600        |
|         | 1468.5294       | 734.7683        | 12 | H      | 3  | 451.2287        | 226.1180        |
|         | 1597.5720       | 799.2896        | 13 | E      | 2  | 314.1698        | 157.5885        |
|         |                 |                 | 14 | R[166] | 1  | 185.1272        | 93.0672         |

Annotated spectra from Saleem et. al. 2009

K.EASPAQYS<sub>167</sub>HSLHER<sub>166</sub>T/3

0.8945

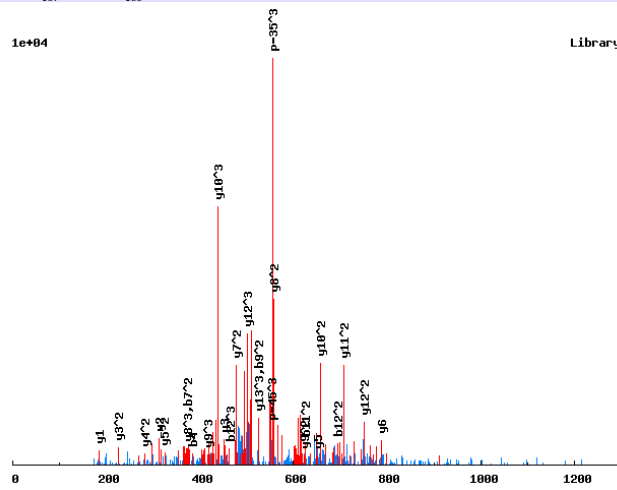

| Library | b <sup>1+</sup> | b <sup>2+</sup> | b <sup>3+</sup> | #  | AA     | #  | y <sup>1+</sup> | y <sup>2+</sup> | y <sup>3+</sup> |
|---------|-----------------|-----------------|-----------------|----|--------|----|-----------------|-----------------|-----------------|
|         | 130.0499        | 65.5286         | 44.0215         | 1  | E      | 14 |                 |                 |                 |
|         | 201.0870        | 101.0471        | 67.7005         | 2  | A      | 13 | 1572.6830       | 786.8451        | 524.8992        |
|         | 288.1190        | 144.5631        | 96.7112         | 3  | S      | 12 | 1501.6459       | 751.3266        | 501.2201        |
|         | 385.1718        | 193.0895        | 129.0621        | 4  | P      | 11 | 1414.6139       | 707.8106        | 472.2095        |
|         | 456.2089        | 228.6081        | 152.7411        | 5  | A      | 10 | 1317.5611       | 659.2842        | 439.8586        |
|         | 584.2675        | 292.6374        | 195.4273        | 6  | Q      | 9  | 1246.5240       | 623.7656        | 416.1795        |
|         | 747.3308        | 374.1690        | 249.7818        | 7  | Y      | 8  | 1118.4654       | 559.7363        | 373.4933        |
|         | 914.3292        | 457.6682        | 305.4479        | 8  | S[167] | 7  | 955.4021        | 478.2047        | 319.1389        |
|         | 1051.3881       | 526.1977        | 351.1342        | 9  | H      | 6  | 788.4037        | 394.7055        | 263.4728        |
|         | 1138.4201       | 569.7137        | 380.1449        | 10 | S      | 5  | 651.3448        | 326.1760        | 217.7865        |
|         | 1251.5042       | 626.2557        | 417.8396        | 11 | L      | 4  | 564.3128        | 282.6600        | 188.7758        |
|         | 1388.5631       | 694.7852        | 463.5259        | 12 | H      | 3  | 451.2287        | 226.1180        | 151.0811        |
|         | 1517.6057       | 759.3065        | 506.5401        | 13 | E      | 2  | 314.1698        | 157.5885        | 105.3948        |
|         |                 |                 |                 | 14 | R[166] | 1  | 185.1272        | 93.0672         | 62.3806         |

# Annotated spectra from Saleem et. al. 2009

K.EAS<sub>167</sub>PAQY<sub>243</sub>S<sub>167</sub>HSLHER<sub>166</sub>T/3

0.9015

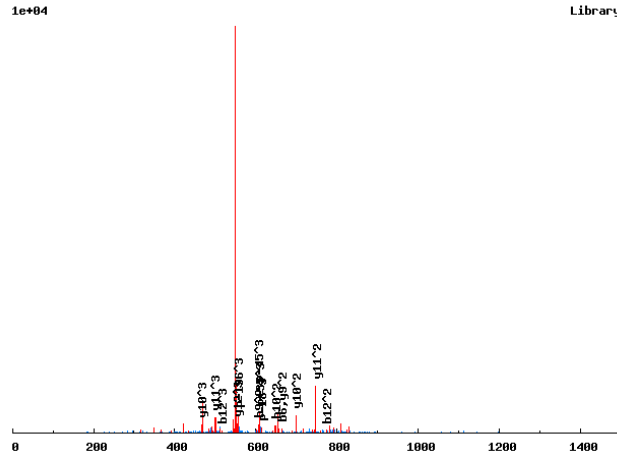

| Library | b <sup>1+</sup> | b <sup>2+</sup> | b <sup>3+</sup> | #  | AA     | #  | y <sup>1+</sup> | y <sup>2+</sup> | y <sup>3+</sup> |
|---------|-----------------|-----------------|-----------------|----|--------|----|-----------------|-----------------|-----------------|
|         | 130.0499        | 65.5286         | 44.0215         | 1  | E      | 14 |                 |                 |                 |
|         | 201.0870        | 101.0471        | 67.7005         | 2  | A      | 13 | 1732.6157       | 866.8115        | 578.2101        |
|         | 368.0853        | 184.5463        | 123.3666        | 3  | S[167] | 12 | 1661.5786       | 831.2929        | 554.5310        |
|         | 465.1381        | 233.0727        | 155.7176        | 4  | P      | 11 | 1494.5802       | 747.7937        | 498.8649        |
|         | 536.1752        | 268.5912        | 179.3966        | 5  | A      | 10 | 1397.5274       | 699.2674        | 466.5140        |
|         | 664.2338        | 332.6205        | 222.0828        | 6  | Q      | 9  | 1326.4903       | 663.7488        | 442.8350        |
|         | 907.2635        | 454.1354        | 303.0927        | 7  | Y[243] | 8  | 1198.4317       | 599.7195        | 400.1488        |
|         | 1074.2618       | 537.6345        | 358.7588        | 8  | S[167] | 7  | 955.4021        | 478.2047        | 319.1389        |
|         | 1211.3207       | 606.1640        | 404.4451        | 9  | H      | 6  | 788.4037        | 394.7055        | 263.4728        |
|         | 1298.3528       | 649.6800        | 433.4558        | 10 | S      | 5  | 651.3448        | 326.1760        | 217.7865        |
|         | 1411.4368       | 706.2220        | 471.1505        | 11 | L      | 4  | 564.3128        | 282.6600        | 188.7758        |
|         | 1548.4957       | 774.7515        | 516.8368        | 12 | H      | 3  | 451.2287        | 226.1180        | 151.0811        |
|         | 1677.5383       | 839.2728        | 559.8510        | 13 | E      | 2  | 314.1698        | 157.5885        | 105.3948        |
|         |                 |                 |                 | 14 | R[166] | 1  | 185.1272        | 93.0672         | 62.3806         |

# Annotated spectra from Saleem et. al. 2009

R.EASS<sub>167</sub>S<sub>167</sub>ST<sub>181</sub>PS<sub>167</sub>K<sub>136</sub>-K/3

0.6512

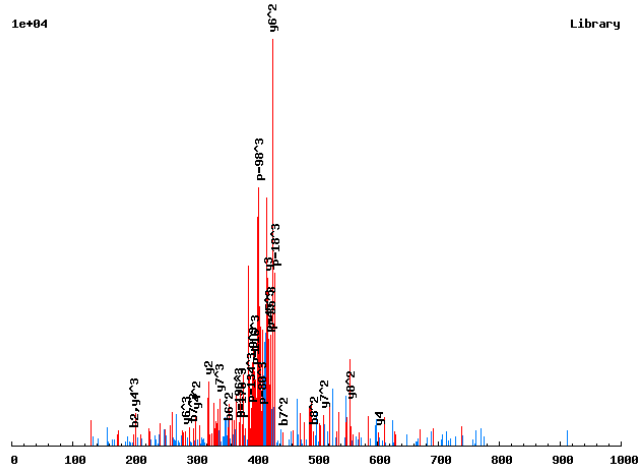

| Library | b <sup>1+</sup> | b <sup>2+</sup> | b <sup>3+</sup> | #  | AA     | #  | y <sup>1+</sup> | y <sup>2+</sup> | y <sup>3+</sup> |
|---------|-----------------|-----------------|-----------------|----|--------|----|-----------------|-----------------|-----------------|
|         | 130.0499        | 65.5286         | 44.0215         | 1  | E      | 10 |                 |                 |                 |
|         | <b>201.0870</b> | 101.0471        | 67.7005         | 2  | A      | 9  | 1179.2900       | 590.1487        | <b>393.7682</b> |
|         | 288.1190        | 144.5631        | 96.7112         | 3  | S      | 8  | 1108.2529       | <b>554.6301</b> | 370.0892        |
|         | 455.1174        | 228.0623        | 152.3773        | 4  | S[167] | 7  | 1021.2209       | <b>511.1141</b> | <b>341.0785</b> |
|         | 622.1157        | 311.5615        | 208.0434        | 5  | S[167] | 6  | 854.2225        | <b>427.6149</b> | <b>285.4124</b> |
|         | 709.1478        | <b>355.0775</b> | 237.0541        | 6  | S      | 5  | 687.2242        | 344.1157        | 229.7462        |
|         | 890.1618        | <b>445.5845</b> | <b>297.3921</b> | 7  | T[181] | 4  | <b>600.1921</b> | <b>300.5997</b> | <b>200.7356</b> |
|         | 987.2145        | <b>494.1109</b> | 329.7430        | 8  | P      | 3  | <b>419.1781</b> | 210.0927        | 140.3976        |
|         | 1154.2129       | 577.6101        | 385.4092        | 9  | S[167] | 2  | <b>322.1254</b> | 161.5663        | 108.0466        |
|         |                 |                 |                 | 10 | K[136] | 1  | 155.1270        | 78.0671         | 52.3805         |

# Annotated spectra from Saleem et. al. 2009

K.EATET<sub>181</sub>SSAVQTK<sub>136</sub>EPEEK<sub>136</sub>IS<sub>167</sub>IGNK<sub>136</sub>S/3

0.9916

1e+04

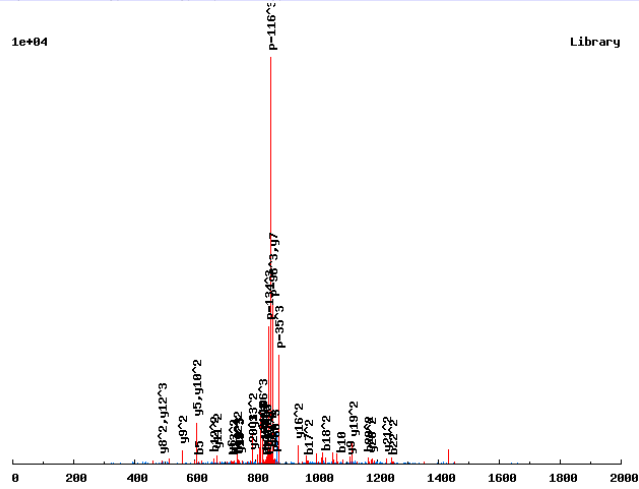

| Library | b <sup>1+</sup> | b <sup>2+</sup> | b <sup>3+</sup> | #  | AA     | #  | y <sup>1+</sup> | y <sup>2+</sup> | y <sup>3+</sup> |
|---------|-----------------|-----------------|-----------------|----|--------|----|-----------------|-----------------|-----------------|
|         | 130.0499        | 65.5286         | 44.0215         | 1  | E      | 23 |                 |                 |                 |
|         | 201.0870        | 101.0471        | 67.7005         | 2  | A      | 22 | 2531.1739       | 1266.0906       | 844.3962        |
|         | 302.1347        | 151.5710        | 101.3831        | 3  | T      | 21 | 2460.1368       | 1230.5721       | 820.7171        |
|         | 431.1773        | 216.0923        | 144.3973        | 4  | E      | 20 | 2359.0892       | 1180.0482       | 787.0346        |
|         | 612.1913        | 306.5993        | 204.7353        | 5  | T[181] | 19 | 2230.0466       | 1115.5269       | 744.0204        |
|         | 699.2233        | 350.1153        | 233.7460        | 6  | S      | 18 | 2049.0326       | 1025.0199       | 683.6824        |
|         | 786.2553        | 393.6313        | 262.7566        | 7  | S      | 17 | 1962.0005       | 981.5039        | 654.6717        |
|         | 857.2924        | 429.1499        | 286.4357        | 8  | A      | 16 | 1874.9685       | 937.9879        | 625.6610        |
|         | 956.3608        | 478.6841        | 319.4585        | 9  | V      | 15 | 1803.9314       | 902.4693        | 601.9820        |
|         | 1084.4194       | 542.7134        | 362.1447        | 10 | Q      | 14 | 1704.8630       | 852.9351        | 568.9592        |
|         | 1185.4671       | 593.2372        | 395.8272        | 11 | T      | 13 | 1576.8044       | 788.9058        | 526.2730        |
|         | 1321.5763       | 661.2918        | 441.1969        | 12 | K[136] | 12 | 1475.7567       | 738.3820        | 492.5904        |
|         | 1450.6188       | 725.8131        | 484.2111        | 13 | E      | 11 | 1339.6476       | 670.3274        | 447.2207        |
|         | 1547.6716       | 774.3394        | 516.5621        | 14 | P      | 10 | 1210.6050       | 605.8061        | 404.2065        |
|         | 1676.7142       | 838.8607        | 559.5763        | 15 | E      | 9  | 1113.5522       | 557.2797        | 371.8556        |
|         | 1805.7568       | 903.3820        | 602.5904        | 16 | E      | 8  | 984.5096        | 492.7584        | 328.8414        |
|         | 1941.8659       | 971.4366        | 647.9602        | 17 | K[136] | 7  | 855.4670        | 428.2372        | 285.8272        |
|         | 2054.9500       | 1027.9786       | 685.6549        | 18 | I      | 6  | 719.3579        | 360.1826        | 240.4575        |
|         | 2221.9484       | 1111.4778       | 741.3210        | 19 | S[167] | 5  | 606.2738        | 303.6405        | 202.7628        |
|         | 2335.0324       | 1168.0199       | 779.0157        | 20 | I      | 4  | 439.2754        | 220.1414        | 147.0967        |
|         | 2392.0539       | 1196.5306       | 798.0228        | 21 | G      | 3  | 326.1914        | 163.5993        | 109.4020        |
|         | 2506.0968       | 1253.5520       | 836.0371        | 22 | N      | 2  | 269.1699        | 135.0886        | 90.3948         |
|         |                 |                 |                 | 23 | K[136] | 1  | 155.1270        | 78.0671         | 52.3805         |

# Annotated spectra from Saleem et. al. 2009

R.EATT<sub>181</sub>PTIETPIS<sub>167</sub>C<sub>160</sub>KPSLFR.L/3

0.8508

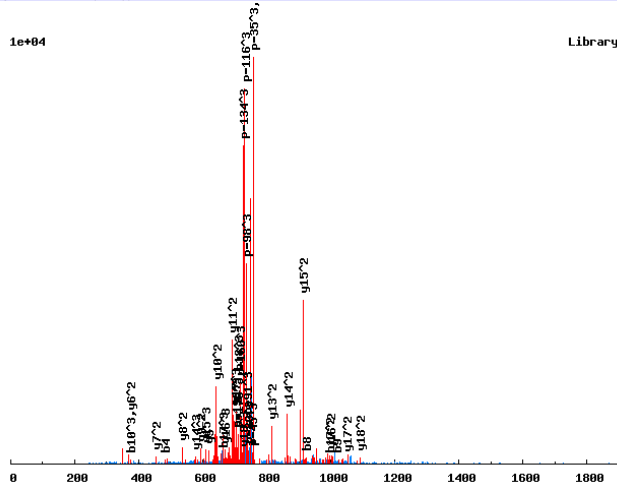

| Library | b <sup>1+</sup> | b <sup>2+</sup> | b <sup>3+</sup> | #  | AA     | #  | y <sup>1+</sup> | y <sup>2+</sup> | y <sup>3+</sup> |
|---------|-----------------|-----------------|-----------------|----|--------|----|-----------------|-----------------|-----------------|
|         | 130.0499        | 65.5286         | 44.0215         | 1  | E      | 19 |                 |                 |                 |
|         | 201.0870        | 101.0471        | 67.7005         | 2  | A      | 18 | 2178.9906       | 1089.9989       | 727.0017        |
|         | 302.1347        | 151.5710        | 101.3831        | 3  | T      | 17 | 2107.9535       | 1054.4804       | 703.3227        |
|         | 483.1487        | 242.0780        | 161.7211        | 4  | T[181] | 16 | 2006.9058       | 1003.9565       | 669.6401        |
|         | 580.2014        | 290.6044        | 194.0720        | 5  | P      | 15 | 1825.8918       | 913.4495        | 609.3021        |
|         | 681.2491        | 341.1282        | 227.7546        | 6  | T      | 14 | 1728.8390       | 864.9231        | 576.9512        |
|         | 794.3332        | 397.6702        | 265.4492        | 7  | I      | 13 | 1627.7913       | 814.3993        | 543.2686        |
|         | 923.3758        | 462.1915        | 308.4634        | 8  | E      | 12 | 1514.7073       | 757.8573        | 505.5739        |
|         | 1024.4234       | 512.7154        | 342.1460        | 9  | T      | 11 | 1385.6647       | 693.3360        | 462.5597        |
|         | 1121.4762       | 561.2417        | 374.4969        | 10 | P      | 10 | 1284.6170       | 642.8121        | 428.8772        |
|         | 1234.5603       | 617.7838        | 412.1916        | 11 | I      | 9  | 1187.5642       | 594.2858        | 396.5263        |
|         | 1401.5586       | 701.2830        | 467.8577        | 12 | S[167] | 8  | 1074.4802       | 537.7437        | 358.8316        |
|         | 1561.5893       | 781.2983        | 521.2013        | 13 | C[160] | 7  | 907.4818        | 454.2446        | 303.1655        |
|         | 1689.6842       | 845.3458        | 563.8996        | 14 | K      | 6  | 747.4512        | 374.2292        | 249.8219        |
|         | 1786.7370       | 893.8721        | 596.2505        | 15 | P      | 5  | 619.3562        | 310.1817        | 207.1236        |
|         | 1873.7690       | 937.3882        | 625.2612        | 16 | S      | 4  | 522.3034        | 261.6554        | 174.7727        |
|         | 1986.8531       | 993.9302        | 662.9559        | 17 | L      | 3  | 435.2714        | 218.1393        | 145.7620        |
|         | 2133.9215       | 1067.4644       | 711.9787        | 18 | F      | 2  | 322.1874        | 161.5973        | 108.0673        |
|         |                 |                 |                 | 19 | R      | 1  | 175.1190        | 88.0631         | 59.0445         |

# Annotated spectra from Saleem et. al. 2009

K.EAVPES<sub>167</sub>.PR.A/2

0.9782

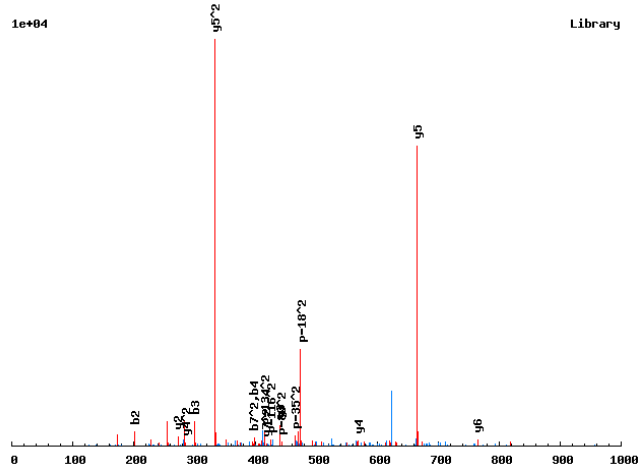

| Library | b <sup>1+</sup> | b <sup>2+</sup> | # | AA      | # | y <sup>1+</sup> | y <sup>2+</sup> |
|---------|-----------------|-----------------|---|---------|---|-----------------|-----------------|
|         | 130.0499        | 65.5286         | 1 | E       | 8 |                 |                 |
|         | 201.0870        | 101.0471        | 2 | A       | 7 | 835.3709        | 418.1891        |
|         | 300.1554        | 150.5813        | 3 | V       | 6 | 764.3338        | 382.6706        |
|         | 397.2081        | 199.1077        | 4 | P       | 5 | 665.2654        | 333.1364        |
|         | 526.2507        | 263.6290        | 5 | E       | 4 | 568.2127        | 284.6100        |
|         | 693.2491        | 347.1282        | 6 | S [167] | 3 | 439.1701        | 220.0887        |
|         | 790.3019        | 395.6546        | 7 | P       | 2 | 272.1717        | 136.5895        |
|         |                 |                 | 8 | R       | 1 | 175.1190        | 88.0631         |



Annotated spectra from Saleem et. al. 2009

K.EAVPES<sub>167</sub>PR<sub>166</sub>ASGET<sub>181</sub>AIHEPEPEAEQAVEDTA.-/3

0.9993

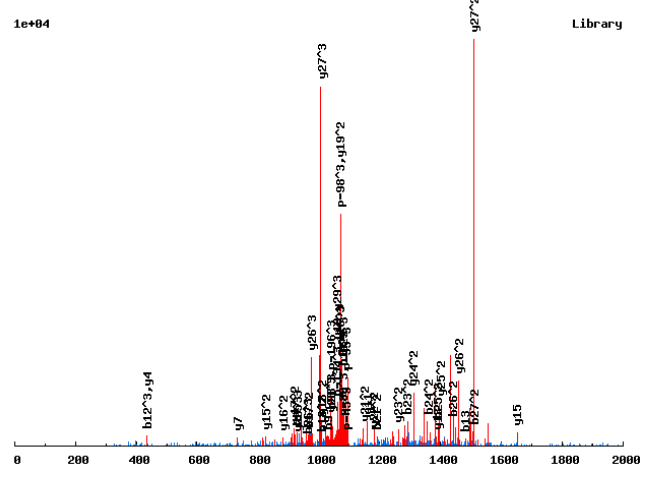

| Library | b <sup>1+</sup> | b <sup>2+</sup> | b <sup>3+</sup> | #  | AA     | #  | y <sup>1+</sup> | y <sup>2+</sup> | y <sup>3+</sup> |
|---------|-----------------|-----------------|-----------------|----|--------|----|-----------------|-----------------|-----------------|
|         | 130.0499        | 65.5286         | 44.0215         | 1  | E      | 30 |                 |                 |                 |
|         | 201.0870        | 101.0471        | 67.7005         | 2  | A      | 29 | 3187.3379       | 1594.1726       | 1063.1175       |
|         | 300.1554        | 150.5813        | 100.7233        | 3  | V      | 28 | 3116.3008       | 1558.6540       | 1039.4385       |
|         | 397.2081        | 199.1077        | 133.0742        | 4  | P      | 27 | 3017.2324       | 1509.1198       | 1006.4156       |
|         | 526.2507        | 263.6290        | 176.0884        | 5  | E      | 26 | 2920.1796       | 1460.5935       | 974.0647        |
|         | 693.2491        | 347.1282        | 231.7546        | 6  | S[167] | 25 | 2791.1370       | 1396.0722       | 931.0505        |
|         | 790.3019        | 395.6546        | 264.1055        | 7  | P      | 24 | 2624.1387       | 1312.5730       | 875.3844        |
|         | 956.4112        | 478.7093        | 319.4753        | 8  | R[166] | 23 | 2527.0859       | 1264.0466       | 843.0335        |
|         | 1027.4484       | 514.2278        | 343.1543        | 9  | A      | 22 | 2360.9765       | 1180.9919       | 787.6637        |
|         | 1114.4804       | 557.7438        | 372.1650        | 10 | S      | 21 | 2289.9394       | 1145.4734       | 763.9847        |
|         | 1171.5018       | 586.2546        | 391.1721        | 11 | G      | 20 | 2202.9074       | 1101.9573       | 734.9740        |
|         | 1300.5444       | 650.7759        | 434.1863        | 12 | E      | 19 | 2145.8859       | 1073.4466       | 715.9668        |
|         | 1481.5584       | 741.2829        | 494.5243        | 13 | T[181] | 18 | 2016.8433       | 1008.9253       | 672.9526        |
|         | 1552.5956       | 776.8014        | 518.2034        | 14 | A      | 17 | 1835.8293       | 918.4183        | 612.6146        |
|         | 1665.6796       | 833.3434        | 555.8981        | 15 | I      | 16 | 1764.7922       | 882.8998        | 588.9356        |
|         | 1802.7385       | 901.8729        | 601.5844        | 16 | H      | 15 | 1651.7082       | 826.3577        | 551.2409        |
|         | 1931.7811       | 966.3942        | 644.5986        | 17 | E      | 14 | 1514.6492       | 757.8283        | 505.5546        |
|         | 2028.8339       | 1014.9206       | 676.9495        | 18 | P      | 13 | 1385.6067       | 693.3070        | 462.5404        |
|         | 2157.8765       | 1079.4419       | 719.9637        | 19 | E      | 12 | 1288.5539       | 644.7806        | 430.1895        |
|         | 2254.9292       | 1127.9683       | 752.3146        | 20 | P      | 11 | 1159.5113       | 580.2593        | 387.1753        |
|         | 2383.9718       | 1192.4895       | 795.3288        | 21 | E      | 10 | 1062.4586       | 531.7329        | 354.8244        |
|         | 2455.0089       | 1228.0081       | 819.0078        | 22 | A      | 9  | 933.4160        | 467.2116        | 311.8102        |
|         | 2584.0515       | 1292.5294       | 862.0220        | 23 | E      | 8  | 862.3789        | 431.6931        | 288.1311        |
|         | 2712.1101       | 1356.5587       | 904.7082        | 24 | Q      | 7  | 733.3363        | 367.1718        | 245.1169        |
|         | 2783.1472       | 1392.0772       | 928.3873        | 25 | A      | 6  | 605.2777        | 303.1425        | 202.4307        |
|         | 2882.2156       | 1441.6114       | 961.4101        | 26 | V      | 5  | 534.2406        | 267.6239        | 178.7517        |
|         | 3011.2582       | 1506.1327       | 1004.4243       | 27 | E      | 4  | 435.1722        | 218.0897        | 145.7289        |
|         | 3126.2851       | 1563.6462       | 1042.7666       | 28 | D      | 3  | 306.1296        | 153.5684        | 102.7147        |
|         | 3227.3328       | 1614.1701       | 1076.4491       | 29 | T      | 2  | 191.1026        | 96.0550         | 64.3724         |
|         |                 |                 |                 | 30 | A      | 1  | 90.0549         | 45.5311         | 30.6898         |

# Annotated spectra from Saleem et. al. 2009

K.EEEPILAPS<sub>167</sub>VK<sub>136</sub>D/2

0.8832

1e+04

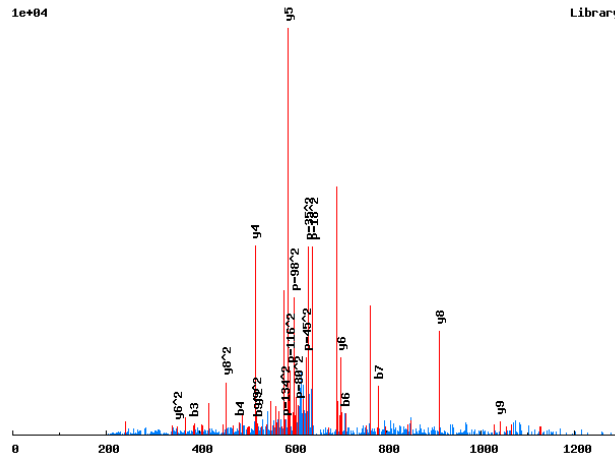

| Library | b <sup>1+</sup> | b <sup>2+</sup> | #  | AA     | #  | y <sup>1+</sup> | y <sup>2+</sup> |
|---------|-----------------|-----------------|----|--------|----|-----------------|-----------------|
|         | 130.0499        | 65.5286         | 1  | E      | 11 |                 |                 |
|         | 259.0925        | 130.0499        | 2  | E      | 10 | 1170.5897       | 585.7985        |
|         | 388.1350        | 194.5712        | 3  | E      | 9  | 1041.5471       | 521.2772        |
|         | 485.1878        | 243.0975        | 4  | P      | 8  | 912.5045        | 456.7559        |
|         | 598.2719        | 299.6396        | 5  | I      | 7  | 815.4518        | 408.2295        |
|         | 711.3559        | 356.1816        | 6  | L      | 6  | 702.3677        | 351.6875        |
|         | 782.3930        | 391.7002        | 7  | A      | 5  | 589.2836        | 295.1455        |
|         | 879.4458        | 440.2265        | 8  | P      | 4  | 518.2465        | 259.6269        |
|         | 1046.4442       | 523.7257        | 9  | S[167] | 3  | 421.1938        | 211.1005        |
|         | 1145.5126       | 573.2599        | 10 | V      | 2  | 254.1954        | 127.6013        |
|         |                 |                 | 11 | K[136] | 1  | 155.1270        | 78.0671         |

# Annotated spectra from Saleem et. al. 2009

KEENAEEDDES<sub>167</sub>EWS<sub>167</sub>DDEPEVVR<sub>166</sub>E/2

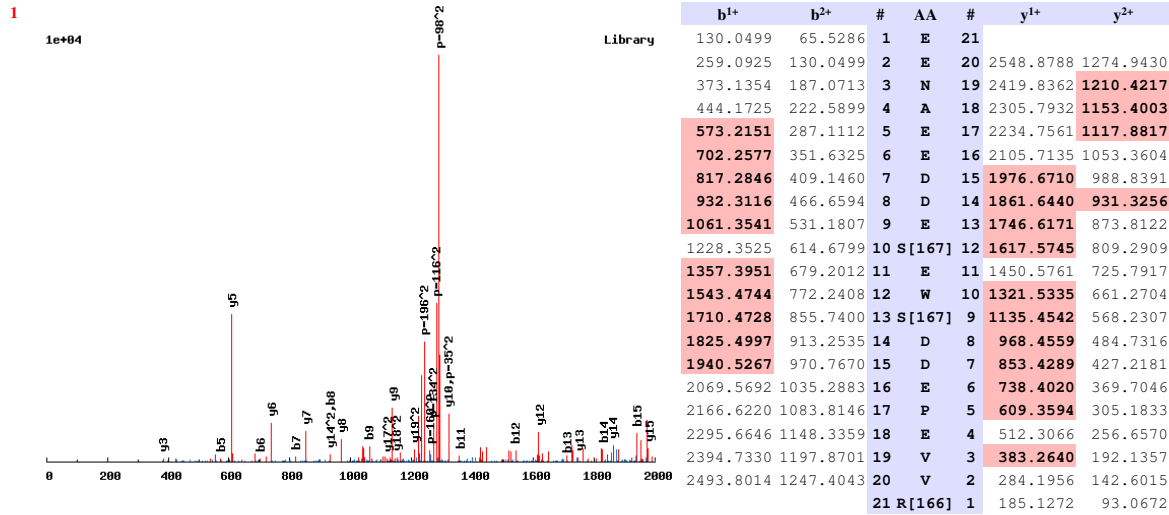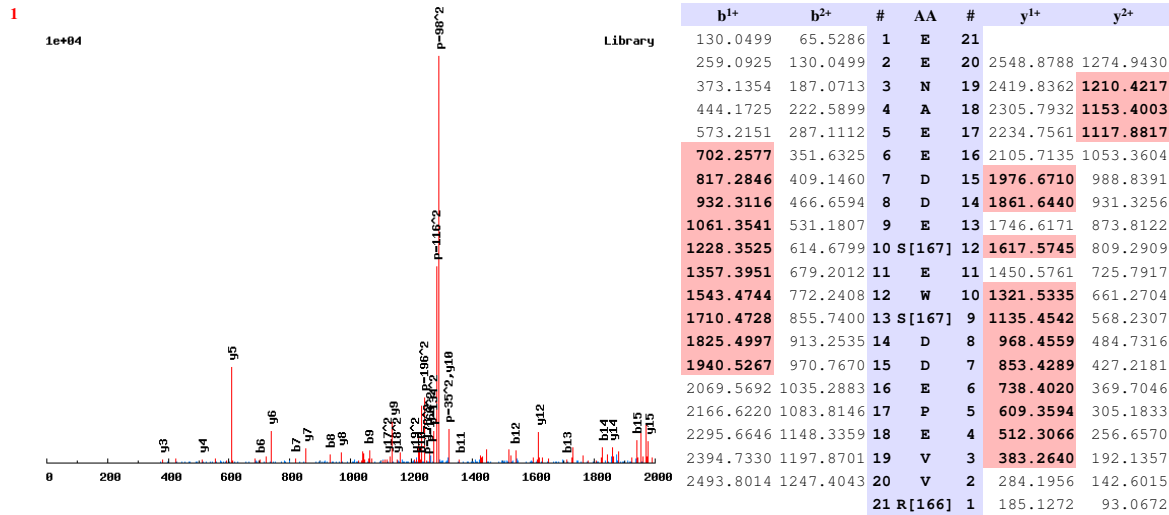

# Annotated spectra from Saleem et. al. 2009

R.EFEYKDQDQSS<sub>167</sub>PKVEVTS<sub>167</sub>EDEK.E/3

0.9991

1e+04

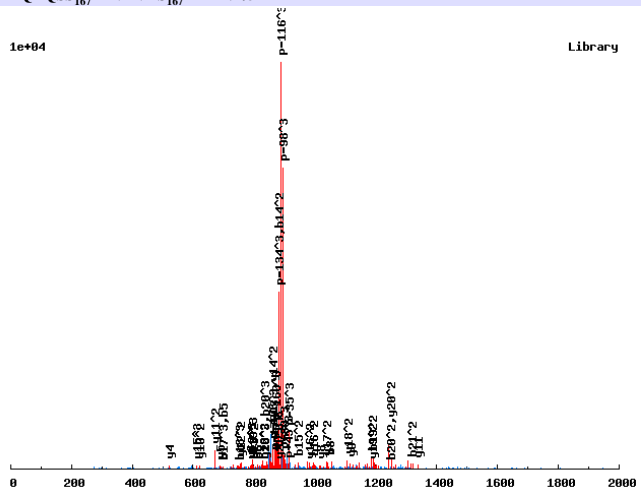

| Library | b <sup>1+</sup> | b <sup>2+</sup> | b <sup>3+</sup> | #  | AA     | #  | y <sup>1+</sup> | y <sup>2+</sup> | y <sup>3+</sup> |
|---------|-----------------|-----------------|-----------------|----|--------|----|-----------------|-----------------|-----------------|
|         | 130.0499        | 65.5286         | 44.0215         | 1  | E      | 22 |                 |                 |                 |
|         | 277.1183        | 139.0628        | 93.0443         | 2  | F      | 21 | 2648.0688       | 1324.5380       | 883.3611        |
|         | 406.1609        | 203.5841        | 136.0585        | 3  | E      | 20 | 2501.0004       | 1251.0038       | 834.3383        |
|         | 569.2242        | 285.1157        | 190.4129        | 4  | Y      | 19 | 2371.9578       | 1186.4825       | 791.3241        |
|         | 697.3192        | 349.1632        | 233.1112        | 5  | K      | 18 | 2208.8945       | 1104.9509       | 736.9697        |
|         | 812.3461        | 406.6767        | 271.4536        | 6  | D      | 17 | 2080.7995       | 1040.9034       | 694.2714        |
|         | 940.4047        | 470.7060        | 314.1397        | 7  | Q      | 16 | 1965.7726       | 983.3899        | 655.9290        |
|         | 1055.4316       | 528.2195        | 352.4821        | 8  | D      | 15 | 1837.7140       | 919.3606        | 613.2429        |
|         | 1183.4902       | 592.2487        | 395.1683        | 9  | Q      | 14 | 1722.6871       | 861.8472        | 574.9005        |
|         | 1270.5222       | 635.7648        | 424.1789        | 10 | S      | 13 | 1594.6285       | 797.8179        | 532.2143        |
|         | 1437.5206       | 719.2639        | 479.8451        | 11 | S[167] | 12 | 1507.5965       | 754.3019        | 503.2037        |
|         | 1534.5734       | 767.7903        | 512.1960        | 12 | P      | 11 | 1340.5981       | 670.8027        | 447.5376        |
|         | 1662.6683       | 831.8378        | 554.8943        | 13 | K      | 10 | 1243.5453       | 622.2763        | 415.1866        |
|         | 1761.7367       | 881.3720        | 587.9171        | 14 | V      | 9  | 1115.4504       | 558.2288        | 372.4883        |
|         | 1890.7793       | 945.8933        | 630.9313        | 15 | E      | 8  | 1016.3820       | 508.6946        | 339.4655        |
|         | 1989.8477       | 995.4275        | 663.9541        | 16 | V      | 7  | 887.3394        | 444.1733        | 296.4513        |
|         | 2090.8954       | 1045.9513       | 697.6367        | 17 | T      | 6  | 788.2710        | 394.6391        | 263.4285        |
|         | 2257.8938       | 1129.4505       | 753.3028        | 18 | S[167] | 5  | 687.2233        | 344.1153        | 229.7459        |
|         | 2386.9364       | 1193.9718       | 796.3170        | 19 | E      | 4  | 520.2249        | 260.6161        | 174.0798        |
|         | 2501.9633       | 1251.4853       | 834.6593        | 20 | D      | 3  | 391.1823        | 196.0948        | 131.0656        |
|         | 2631.0059       | 1316.0066       | 877.6735        | 21 | E      | 2  | 276.1554        | 138.5813        | 92.7233         |
|         |                 |                 |                 | 22 | K      | 1  | 147.1128        | 74.0600         | 49.7091         |

# Annotated spectra from Saleem et. al. 2009

K.EGDDAPES<sub>167</sub>PDIHFEPVVHLEK<sub>136</sub>V/3

0.9909

1e+04

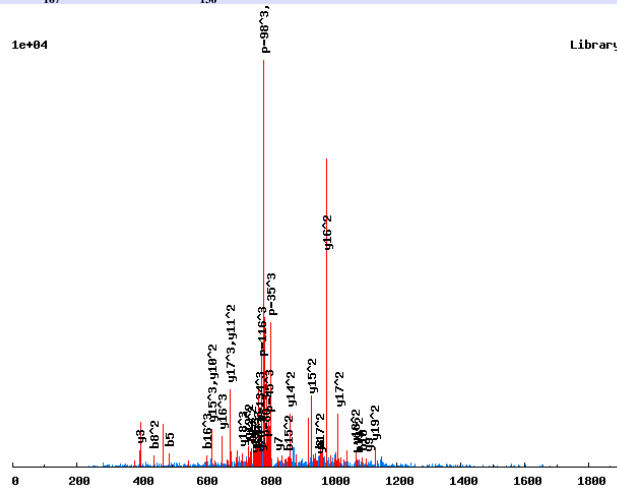

| Library | b <sup>1+</sup> | b <sup>2+</sup> | b <sup>3+</sup> | #  | AA     | #  | y <sup>1+</sup> | y <sup>2+</sup> | y <sup>3+</sup> |
|---------|-----------------|-----------------|-----------------|----|--------|----|-----------------|-----------------|-----------------|
|         | 130.0499        | 65.5286         | 44.0215         | 1  | E      | 21 |                 |                 |                 |
|         | 187.0713        | 94.0393         | 63.0286         | 2  | G      | 20 | 2319.0420       | 1160.0246       | 773.6855        |
|         | 302.0983        | 151.5528        | 101.3709        | 3  | D      | 19 | 2262.0205       | 1131.5139       | 754.6784        |
|         | 417.1252        | 209.0662        | 139.7133        | 4  | D      | 18 | 2146.9936       | 1074.0004       | 716.3360        |
|         | 488.1623        | 244.5848        | 163.3923        | 5  | A      | 17 | 2031.9666       | 1016.4870       | 677.9937        |
|         | 585.2151        | 293.1112        | 195.7432        | 6  | P      | 16 | 1960.9295       | 980.9684        | 654.3147        |
|         | 714.2577        | 357.6325        | 238.7574        | 7  | E      | 15 | 1863.8768       | 932.4420        | 621.9638        |
|         | 881.2560        | 441.1317        | 294.4235        | 8  | S[167] | 14 | 1734.8342       | 867.9207        | 578.9496        |
|         | 978.3088        | 489.6580        | 326.7745        | 9  | P      | 13 | 1567.8358       | 784.4215        | 523.2835        |
|         | 1093.3357       | 547.1715        | 365.1168        | 10 | D      | 12 | 1470.7830       | 735.8952        | 490.9325        |
|         | 1206.4198       | 603.7135        | 402.8115        | 11 | I      | 11 | 1355.7561       | 678.3817        | 452.5902        |
|         | 1343.4787       | 672.2430        | 448.4978        | 12 | H      | 10 | 1242.6720       | 621.8397        | 414.8955        |
|         | 1490.5471       | 745.7772        | 497.5206        | 13 | F      | 9  | 1105.6131       | 553.3102        | 369.2092        |
|         | 1619.5897       | 810.2985        | 540.5348        | 14 | E      | 8  | 958.5447        | 479.7760        | 320.1864        |
|         | 1716.6425       | 858.8249        | 572.8857        | 15 | P      | 7  | 829.5021        | 415.2547        | 277.1722        |
|         | 1815.7109       | 908.3591        | 605.9085        | 16 | V      | 6  | 732.4494        | 366.7283        | 244.8213        |
|         | 1914.7793       | 957.8933        | 638.9313        | 17 | V      | 5  | 633.3810        | 317.1941        | 211.7985        |
|         | 2051.8382       | 1026.4227       | 684.6176        | 18 | H      | 4  | 534.3126        | 267.6599        | 178.7757        |
|         | 2164.9223       | 1082.9648       | 722.3123        | 19 | L      | 3  | 397.2536        | 199.1305        | 133.0894        |
|         | 2293.9648       | 1147.4861       | 765.3265        | 20 | E      | 2  | 284.1696        | 142.5884        | 95.3947         |
|         |                 |                 |                 | 21 | K[136] | 1  | 155.1270        | 78.0671         | 52.3805         |

# Annotated spectra from Saleem et. al. 2009

R.EG PQS<sub>167</sub> VSST<sub>181</sub> VQPQPIM<sub>147</sub> K<sub>136</sub> F/2

0.926

1e+04

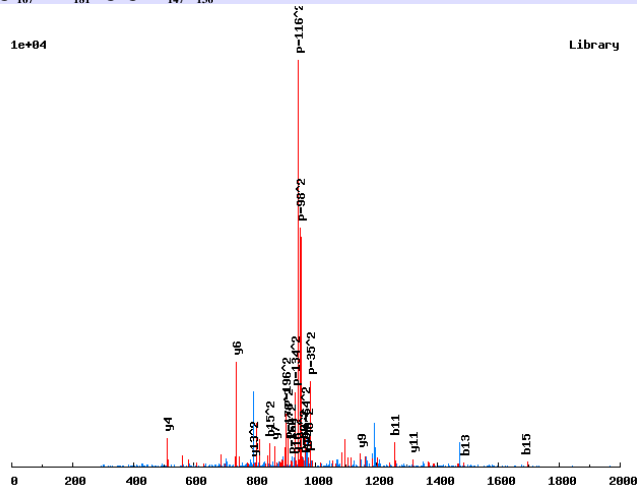

| Library | b <sup>1+</sup>  | b <sup>2+</sup> | #  | AA      | #  | y <sup>1+</sup>  | y <sup>2+</sup> |
|---------|------------------|-----------------|----|---------|----|------------------|-----------------|
|         | 130.0499         | 65.5286         | 1  | E       | 17 |                  |                 |
|         | 187.0713         | 94.0393         | 2  | G       | 16 | 1867.8152        | <b>934.4112</b> |
|         | 284.1241         | 142.5657        | 3  | P       | 15 | 1810.7937        | 905.9005        |
|         | 412.1827         | 206.5950        | 4  | Q       | 14 | 1713.7410        | 857.3741        |
|         | 579.1810         | 290.0942        | 5  | S [167] | 13 | 1585.6824        | <b>793.3448</b> |
|         | 678.2494         | 339.6284        | 6  | V       | 12 | 1418.6840        | 709.8457        |
|         | 765.2815         | 383.1444        | 7  | S       | 11 | <b>1319.6156</b> | 660.3114        |
|         | 852.3135         | 426.6604        | 8  | S       | 10 | 1232.5836        | 616.7954        |
|         | 1033.3275        | 517.1674        | 9  | T [181] | 9  | <b>1145.5516</b> | 573.2794        |
|         | 1132.3959        | 566.7016        | 10 | V       | 8  | <b>964.5375</b>  | 482.7724        |
|         | <b>1260.4545</b> | 630.7309        | 11 | Q       | 7  | <b>865.4691</b>  | 433.2382        |
|         | 1357.5073        | 679.2573        | 12 | P       | 6  | <b>737.4106</b>  | 369.2089        |
|         | <b>1485.5658</b> | 743.2866        | 13 | Q       | 5  | 640.3578         | 320.6825        |
|         | 1582.6186        | 791.8129        | 14 | P       | 4  | <b>512.2992</b>  | 256.6532        |
|         | <b>1695.7027</b> | <b>848.3550</b> | 15 | I       | 3  | 415.2465         | 208.1269        |
|         | 1842.7381        | 921.8727        | 16 | M [147] | 2  | 302.1624         | 151.5848        |
|         |                  |                 | 17 | K [136] | 1  | 155.1270         | 78.0671         |

# Annotated spectra from Saleem et. al. 2009

R.EIDQES<sub>167</sub>S<sub>167</sub>DDELK.T/2

0.9623

1e+04

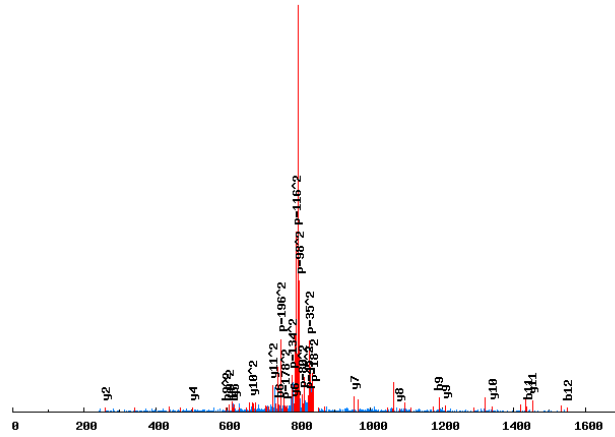

| Library | b <sup>1+</sup> | b <sup>2+</sup> | #  | AA     | #  | y <sup>1+</sup> | y <sup>2+</sup> |
|---------|-----------------|-----------------|----|--------|----|-----------------|-----------------|
|         | 130.0499        | 65.5286         | 1  | E      | 13 |                 |                 |
|         | 243.1339        | 122.0706        | 2  | I      | 12 | 1567.5448       | 784.2760        |
|         | 358.1609        | 179.5841        | 3  | D      | 11 | 1454.4608       | 727.7340        |
|         | 487.2035        | 244.1054        | 4  | E      | 10 | 1339.4338       | 670.2205        |
|         | 615.2620        | 308.1347        | 5  | Q      | 9  | 1210.3912       | 605.6993        |
|         | 744.3046        | 372.6560        | 6  | E      | 8  | 1082.3326       | 541.6700        |
|         | 911.3030        | 456.1551        | 7  | S[167] | 7  | 953.2901        | 477.1487        |
|         | 1078.3014       | 539.6543        | 8  | S[167] | 6  | 786.2917        | 393.6495        |
|         | 1193.3283       | 597.1678        | 9  | D      | 5  | 619.2933        | 310.1503        |
|         | 1308.3552       | 654.6813        | 10 | D      | 4  | 504.2664        | 252.6368        |
|         | 1437.3978       | 719.2026        | 11 | E      | 3  | 389.2394        | 195.1234        |
|         | 1550.4819       | 775.7446        | 12 | L      | 2  | 260.1969        | 130.6021        |
|         |                 |                 | 13 | K      | 1  | 147.1128        | 74.0600         |

# Annotated spectra from Saleem et. al. 2009

K.EKADTLKPLPS<sub>167</sub>VTS<sub>167</sub>FGSPR.K/3

0.8027

1e+04

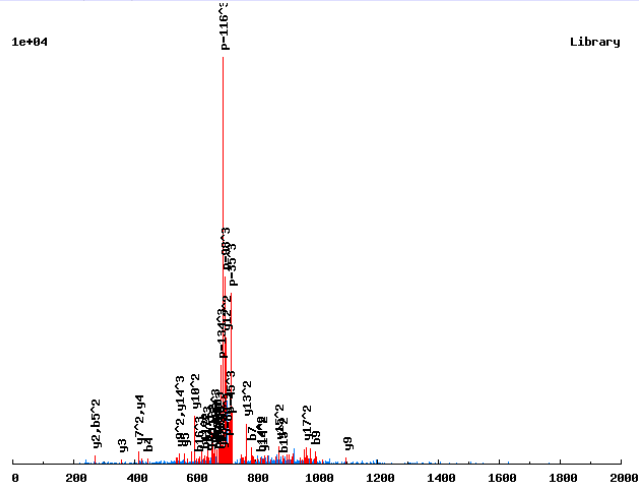

| Library | b <sup>1+</sup> | b <sup>2+</sup> | b <sup>3+</sup> | #  | AA     | #  | y <sup>1+</sup> | y <sup>2+</sup> | y <sup>3+</sup> |
|---------|-----------------|-----------------|-----------------|----|--------|----|-----------------|-----------------|-----------------|
|         | 130.0499        | 65.5286         | 44.0215         | 1  | E      | 19 |                 |                 |                 |
|         | 258.1448        | 129.5761        | 86.7198         | 2  | K      | 18 | 2060.9817       | 1030.9945       | 687.6654        |
|         | 329.1819        | 165.0946        | 110.3988        | 3  | A      | 17 | 1932.8868       | 966.9470        | 644.9671        |
|         | 444.2089        | 222.6081        | 148.7411        | 4  | D      | 16 | 1861.8496       | 931.4285        | 621.2881        |
|         | 545.2566        | 273.1319        | 182.4237        | 5  | T      | 15 | 1746.8227       | 873.9150        | 582.9458        |
|         | 658.3406        | 329.6740        | 220.1184        | 6  | L      | 14 | 1645.7750       | 823.3912        | 549.2632        |
|         | 786.4356        | 393.7214        | 262.8167        | 7  | K      | 13 | 1532.6910       | 766.8491        | 511.5685        |
|         | 883.4883        | 442.2478        | 295.1676        | 8  | P      | 12 | 1404.5960       | 702.8016        | 468.8702        |
|         | 996.5724        | 498.7898        | 332.8623        | 9  | L      | 11 | 1307.5432       | 654.2753        | 436.5193        |
|         | 1093.6252       | 547.3162        | 365.2132        | 10 | P      | 10 | 1194.4592       | 597.7332        | 398.8246        |
|         | 1260.6235       | 630.8154        | 420.8794        | 11 | S[167] | 9  | 1097.4064       | 549.2069        | 366.4737        |
|         | 1359.6919       | 680.3496        | 453.9022        | 12 | V      | 8  | 930.4081        | 465.7077        | 310.8075        |
|         | 1460.7396       | 730.8734        | 487.5847        | 13 | T      | 7  | 831.3397        | 416.1735        | 277.7847        |
|         | 1627.7380       | 814.3726        | 543.2508        | 14 | S[167] | 6  | 730.2920        | 365.6496        | 244.1022        |
|         | 1774.8064       | 887.9068        | 592.2736        | 15 | F      | 5  | 563.2936        | 282.1504        | 188.4361        |
|         | 1831.8278       | 916.4176        | 611.2808        | 16 | G      | 4  | 416.2252        | 208.6162        | 139.4133        |
|         | 1918.8599       | 959.9336        | 640.2915        | 17 | S      | 3  | 359.2037        | 180.1055        | 120.4061        |
|         | 2015.9126       | 1008.4600       | 672.6424        | 18 | P      | 2  | 272.1717        | 136.5895        | 91.3954         |
|         |                 |                 |                 | 19 | R      | 1  | 175.1190        | 88.0631         | 59.0445         |



Annotated spectra from Saleem et. al. 2009

K.EKET<sub>181</sub>TES<sub>167</sub>PAETTTGTSTEAPSAAN.-/2

0.9223

1e+04

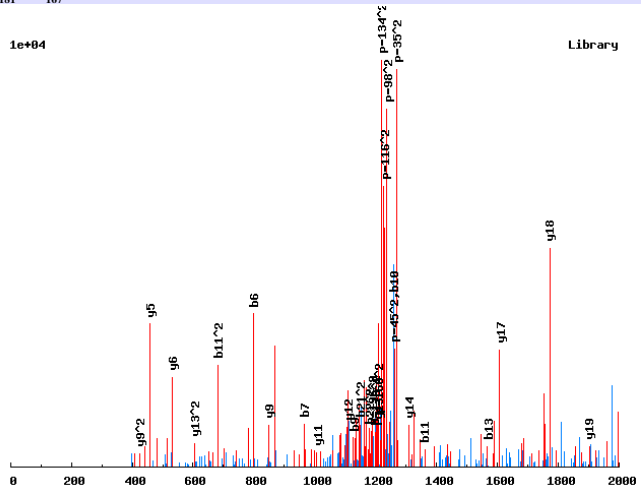

| Library | b <sup>1+</sup> | b <sup>2+</sup> | #  | AA     | #  | y <sup>1+</sup> | y <sup>2+</sup> |
|---------|-----------------|-----------------|----|--------|----|-----------------|-----------------|
|         | 130.0499        | 65.5286         | 1  | E      | 24 |                 |                 |
|         | 258.1448        | 129.5761        | 2  | K      | 23 | 2440.9640       | 1220.9857       |
|         | 387.1874        | 194.0973        | 3  | E      | 22 | 2312.8691       | 1156.9382       |
|         | 568.2014        | 284.6044        | 4  | T[181] | 21 | 2183.8265       | 1092.4169       |
|         | 669.2491        | 335.1282        | 5  | T      | 20 | 2002.8125       | 1001.9099       |
|         | 798.2917        | 399.6495        | 6  | E      | 19 | 1901.7648       | 951.3860        |
|         | 965.2901        | 483.1487        | 7  | S[167] | 18 | 1772.7222       | 886.8647        |
|         | 1062.3428       | 531.6751        | 8  | P      | 17 | 1605.7238       | 803.3656        |
|         | 1133.3799       | 567.1936        | 9  | A      | 16 | 1508.6711       | 754.8392        |
|         | 1262.4225       | 631.7149        | 10 | E      | 15 | 1437.6340       | 719.3206        |
|         | 1363.4702       | 682.2387        | 11 | T      | 14 | 1308.5914       | 654.7993        |
|         | 1464.5179       | 732.7626        | 12 | T      | 13 | 1207.5437       | 604.2755        |
|         | 1565.5656       | 783.2864        | 13 | T      | 12 | 1106.4960       | 553.7516        |
|         | 1622.5870       | 811.7972        | 14 | G      | 11 | 1005.4483       | 503.2278        |
|         | 1723.6347       | 862.3210        | 15 | T      | 10 | 948.4269        | 474.7171        |
|         | 1810.6667       | 905.8370        | 16 | S      | 9  | 847.3792        | 424.1932        |
|         | 1911.7144       | 956.3608        | 17 | T      | 8  | 760.3472        | 380.6772        |
|         | 2040.7570       | 1020.8821       | 18 | E      | 7  | 659.2995        | 330.1534        |
|         | 2111.7941       | 1056.4007       | 19 | A      | 6  | 530.2569        | 265.6321        |
|         | 2208.8469       | 1104.9271       | 20 | P      | 5  | 459.2198        | 230.1135        |
|         | 2295.8789       | 1148.4431       | 21 | S      | 4  | 362.1670        | 181.5871        |
|         | 2366.9160       | 1183.9616       | 22 | A      | 3  | 275.1350        | 138.0711        |
|         | 2437.9531       | 1219.4802       | 23 | A      | 2  | 204.0979        | 102.5526        |
|         |                 |                 | 24 | N      | 1  | 133.0608        | 67.0340         |

# Annotated spectra from Saleem et. al. 2009

K.EKQES<sub>167</sub>PDAAFETGFR.K/3

0.7003

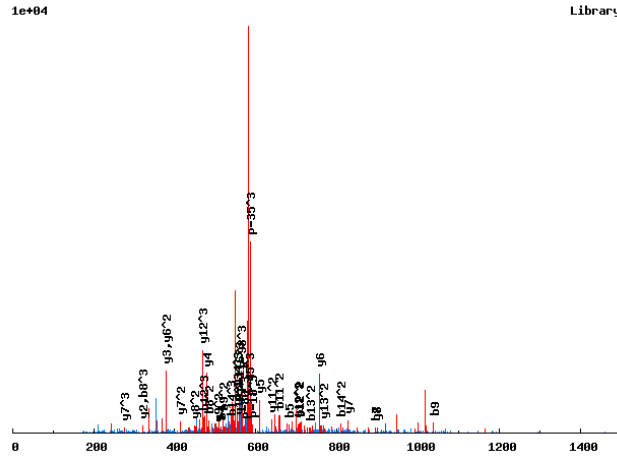

| Library | b <sup>1+</sup> | b <sup>2+</sup> | b <sup>3+</sup> | #  | AA     | #  | y <sup>1+</sup> | y <sup>2+</sup> | y <sup>3+</sup> |
|---------|-----------------|-----------------|-----------------|----|--------|----|-----------------|-----------------|-----------------|
|         | 130.0499        | 65.5286         | 44.0215         | 1  | E      | 15 |                 |                 |                 |
|         | 258.1448        | 129.5761        | 86.7198         | 2  | K      | 14 | 1662.7159       | 831.8616        | 554.9102        |
|         | 386.2034        | 193.6053        | 129.4060        | 3  | Q      | 13 | 1534.6210       | 767.8141        | 512.2118        |
|         | 515.2460        | 258.1266        | 172.4202        | 4  | E      | 12 | 1406.5624       | 703.7848        | 469.5256        |
|         | 682.2444        | 341.6258        | 228.0863        | 5  | S[167] | 11 | 1277.5198       | 639.2635        | 426.5114        |
|         | 779.2971        | 390.1522        | 260.4372        | 6  | P      | 10 | 1110.5214       | 555.7644        | 370.8453        |
|         | 894.3241        | 447.6657        | 298.7795        | 7  | D      | 9  | 1013.4687       | 507.2380        | 338.4944        |
|         | 965.3612        | 483.1842        | 322.4586        | 8  | A      | 8  | 898.4417        | 449.7245        | 300.1521        |
|         | 1036.3983       | 518.7028        | 346.1376        | 9  | A      | 7  | 827.4046        | 414.2059        | 276.4731        |
|         | 1183.4667       | 592.2370        | 395.1604        | 10 | F      | 6  | 756.3675        | 378.6874        | 252.7940        |
|         | 1312.5093       | 656.7583        | 438.1746        | 11 | E      | 5  | 609.2991        | 305.1532        | 203.7712        |
|         | 1413.5570       | 707.2821        | 471.8572        | 12 | T      | 4  | 480.2565        | 240.6319        | 160.7570        |
|         | 1470.5784       | 735.7929        | 490.8643        | 13 | G      | 3  | 379.2088        | 190.1080        | 127.0745        |
|         | 1617.6468       | 809.3271        | 539.8871        | 14 | F      | 2  | 322.1874        | 161.5973        | 108.0673        |
|         |                 |                 |                 | 15 | R      | 1  | 175.1190        | 88.0631         | 59.0445         |

# Annotated spectra from Saleem et. al. 2009

R.EKS<sub>167</sub>VT<sub>181</sub>PVSPSIEK.K/2

0.9502

1e+04

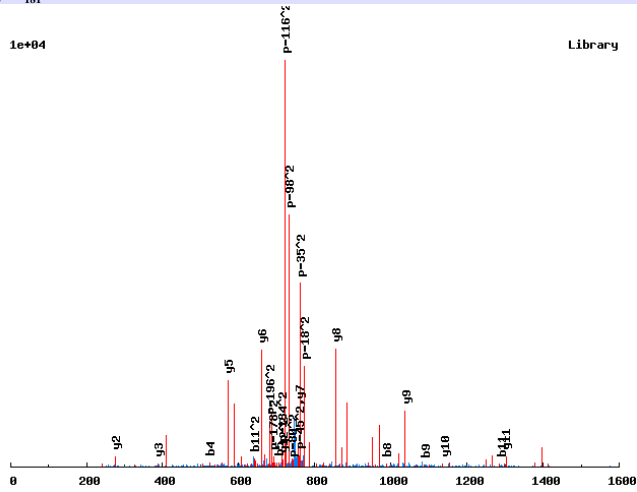

| Library | b <sup>1+</sup>  | b <sup>2+</sup> | #  | AA     | #  | y <sup>1+</sup>  | y <sup>2+</sup> |
|---------|------------------|-----------------|----|--------|----|------------------|-----------------|
|         | 130.0499         | 65.5286         | 1  | E      | 13 |                  |                 |
|         | 258.1448         | 129.5761        | 2  | K      | 12 | 1431.6532        | <b>716.3302</b> |
|         | 425.1432         | 213.0752        | 3  | S[167] | 11 | <b>1303.5582</b> | 652.2828        |
|         | <b>524.2116</b>  | 262.6094        | 4  | V      | 10 | <b>1136.5599</b> | 568.7836        |
|         | <b>705.2256</b>  | 353.1164        | 5  | T[181] | 9  | <b>1037.4915</b> | 519.2494        |
|         | 802.2784         | 401.6428        | 6  | P      | 8  | <b>856.4774</b>  | 428.7424        |
|         | 901.3468         | 451.1770        | 7  | V      | 7  | <b>759.4247</b>  | 380.2160        |
|         | <b>988.3788</b>  | 494.6930        | 8  | S      | 6  | <b>660.3563</b>  | 330.6818        |
|         | <b>1085.4316</b> | 543.2194        | 9  | P      | 5  | <b>573.3242</b>  | 287.1658        |
|         | 1172.4636        | 586.7354        | 10 | S      | 4  | 476.2715         | 238.6394        |
|         | <b>1285.5477</b> | <b>643.2775</b> | 11 | I      | 3  | <b>389.2394</b>  | 195.1234        |
|         | 1414.5903        | 707.7988        | 12 | E      | 2  | <b>276.1554</b>  | 138.5813        |
|         |                  |                 | 13 | K      | 1  | 147.1128         | 74.0600         |

# Annotated spectra from Saleem et. al. 2009

R.EKT<sub>181</sub>QS<sub>167</sub>PILASR.R/2

0.9514

1e+04

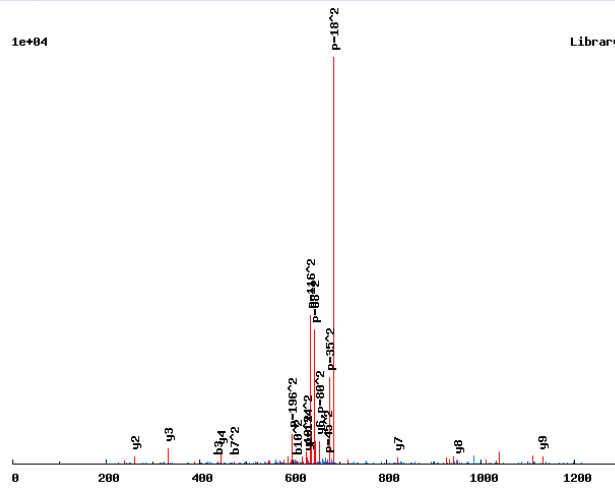

| Library | b <sup>1+</sup> | b <sup>2+</sup> | #  | AA     | #  | y <sup>1+</sup> | y <sup>2+</sup> |
|---------|-----------------|-----------------|----|--------|----|-----------------|-----------------|
|         | 130.0499        | 65.5286         | 1  | E      | 11 |                 |                 |
|         | 258.1448        | 129.5761        | 2  | K      | 10 | 1260.5749       | 630.7911        |
|         | 439.1588        | 220.0831        | 3  | T[181] | 9  | 1132.4799       | 566.7436        |
|         | 567.2174        | 284.1124        | 4  | Q      | 8  | 951.4659        | 476.2366        |
|         | 734.2158        | 367.6115        | 5  | S[167] | 7  | 823.4073        | 412.2073        |
|         | 831.2685        | 416.1379        | 6  | P      | 6  | 656.4090        | 328.7081        |
|         | 944.3526        | 472.6799        | 7  | I      | 5  | 559.3562        | 280.1817        |
|         | 1057.4367       | 529.2220        | 8  | L      | 4  | 446.2722        | 223.6397        |
|         | 1128.4738       | 564.7405        | 9  | A      | 3  | 333.1881        | 167.0977        |
|         | 1215.5058       | 608.2565        | 10 | S      | 2  | 262.1510        | 131.5791        |
|         |                 |                 | 11 | R      | 1  | 175.1190        | 88.0631         |

# Annotated spectra from Saleem et. al. 2009

R.E<sub>111</sub>KTS<sub>167</sub>TPPLPMHFNAQR.R/3

0.7829

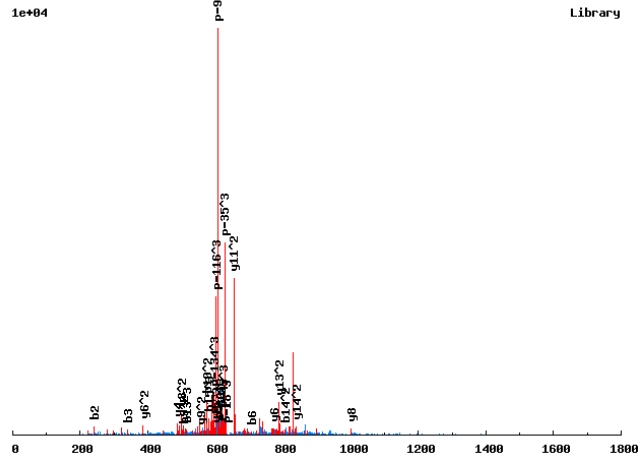

| Library | b <sup>1+</sup> | b <sup>2+</sup> | b <sup>3+</sup> | #  | AA     | #  | y <sup>1+</sup> | y <sup>2+</sup> | y <sup>3+</sup> |
|---------|-----------------|-----------------|-----------------|----|--------|----|-----------------|-----------------|-----------------|
|         | 112.0393        | 56.5233         | 38.0180         | 1  | E[111] | 16 |                 |                 |                 |
|         | 240.1343        | 120.5708        | 80.7163         | 2  | K      | 15 | 1804.8564       | 902.9318        | 602.2903        |
|         | 341.1819        | 171.0946        | 114.3988        | 3  | T      | 14 | 1676.7614       | 838.8844        | 559.5920        |
|         | 508.1803        | 254.5938        | 170.0650        | 4  | S[167] | 13 | 1575.7138       | 788.3605        | 525.9094        |
|         | 609.2280        | 305.1176        | 203.7475        | 5  | T      | 12 | 1408.7154       | 704.8613        | 470.2433        |
|         | 706.2807        | 353.6440        | 236.0984        | 6  | P      | 11 | 1307.6677       | 654.3375        | 436.5608        |
|         | 803.3335        | 402.1704        | 268.4494        | 7  | P      | 10 | 1210.6150       | 605.8111        | 404.2098        |
|         | 916.4176        | 458.7124        | 306.1440        | 8  | L      | 9  | 1113.5622       | 557.2847        | 371.8589        |
|         | 1013.4703       | 507.2388        | 338.4950        | 9  | P      | 8  | 1000.4781       | 500.7427        | 334.1642        |
|         | 1144.5108       | 572.7590        | 382.1751        | 10 | M      | 7  | 903.4254        | 452.2163        | 301.8133        |
|         | 1281.5697       | 641.2885        | 427.8614        | 11 | H      | 6  | 772.3849        | 386.6961        | 258.1332        |
|         | 1428.6381       | 714.8227        | 476.8842        | 12 | F      | 5  | 635.3260        | 318.1666        | 212.4468        |
|         | 1542.6811       | 771.8442        | 514.8985        | 13 | N      | 4  | 488.2576        | 244.6324        | 163.4240        |
|         | 1613.7182       | 807.3627        | 538.5776        | 14 | A      | 3  | 374.2146        | 187.6110        | 125.4097        |
|         | 1741.7768       | 871.3920        | 581.2638        | 15 | Q      | 2  | 303.1775        | 152.0924        | 101.7307        |
|         |                 |                 |                 | 16 | R      | 1  | 175.1190        | 88.0631         | 59.0445         |

# Annotated spectra from Saleem et. al. 2009

R.EK<sub>136</sub>T<sub>181</sub>ST<sub>181</sub>PPLPM<sub>147</sub>HFNAQR<sub>166</sub>R/3

0.9602

1e+04

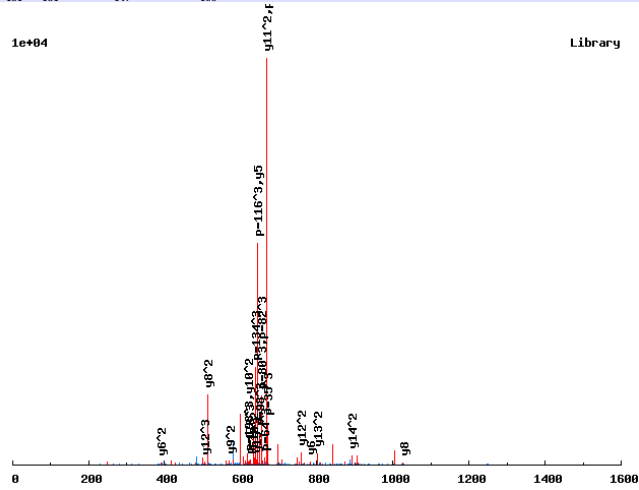

| Library | b <sup>1+</sup> | b <sup>2+</sup> | b <sup>3+</sup> | #  | AA     | #  | y <sup>1+</sup> | y <sup>2+</sup> | y <sup>3+</sup> |
|---------|-----------------|-----------------|-----------------|----|--------|----|-----------------|-----------------|-----------------|
|         | 130.0499        | 65.5286         | 44.0215         | 1  | E      | 16 |                 |                 |                 |
|         | 266.1590        | 133.5832        | 89.3912         | 2  | K[136] | 15 | 1918.8401       | 959.9237        | 640.2849        |
|         | 447.1730        | 224.0902        | 149.7292        | 3  | T[181] | 14 | 1782.7310       | 891.8691        | 594.9152        |
|         | 534.2051        | 267.6062        | 178.7399        | 4  | S      | 13 | 1601.7169       | 801.3621        | 534.5772        |
|         | 715.2191        | 358.1132        | 239.0779        | 5  | T[181] | 12 | 1514.6849       | 757.8461        | 505.5665        |
|         | 812.2718        | 406.6396        | 271.4288        | 6  | P      | 11 | 1333.6709       | 667.3391        | 445.2285        |
|         | 909.3246        | 455.1659        | 303.7797        | 7  | P      | 10 | 1236.6181       | 618.8127        | 412.8776        |
|         | 1022.4087       | 511.7080        | 341.4744        | 8  | L      | 9  | 1139.5654       | 570.2863        | 380.5266        |
|         | 1119.4614       | 560.2344        | 373.8253        | 9  | P      | 8  | 1026.4813       | 513.7443        | 342.8320        |
|         | 1266.4968       | 633.7521        | 422.8371        | 10 | M[147] | 7  | 929.4286        | 465.2179        | 310.4810        |
|         | 1403.5557       | 702.2815        | 468.5234        | 11 | H      | 6  | 782.3932        | 391.7002        | 261.4692        |
|         | 1550.6241       | 775.8157        | 517.5462        | 12 | F      | 5  | 645.3342        | 323.1708        | 215.7829        |
|         | 1664.6671       | 832.8372        | 555.5605        | 13 | N      | 4  | 498.2658        | 249.6366        | 166.7601        |
|         | 1735.7042       | 868.3557        | 579.2396        | 14 | A      | 3  | 384.2229        | 192.6151        | 128.7458        |
|         | 1863.7628       | 932.3850        | 621.9258        | 15 | Q      | 2  | 313.1858        | 157.0965        | 105.0668        |
|         |                 |                 |                 | 16 | R[166] | 1  | 185.1272        | 93.0672         | 62.3806         |

# Annotated spectra from Saleem et. al. 2009

K.ELAPIQLSDGKAIS<sub>167</sub>AGK.A/2

0.7823

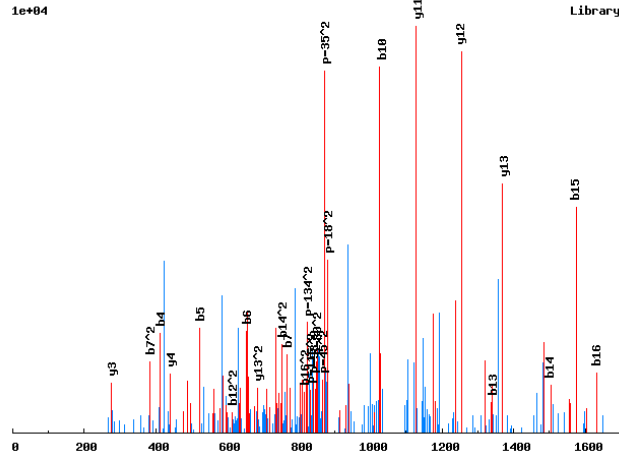

| Library | b <sup>1+</sup> | b <sup>2+</sup> | #  | AA     | #  | y <sup>1+</sup> | y <sup>2+</sup> |
|---------|-----------------|-----------------|----|--------|----|-----------------|-----------------|
|         | 130.0499        | 65.5286         | 1  | E      | 17 |                 |                 |
|         | 243.1339        | 122.0706        | 2  | L      | 16 | 1648.8669       | 824.9371        |
|         | 314.1710        | 157.5892        | 3  | A      | 15 | 1535.7829       | 768.3951        |
|         | 411.2238        | 206.1155        | 4  | P      | 14 | 1464.7458       | 732.8765        |
|         | 524.3079        | 262.6576        | 5  | I      | 13 | 1367.6930       | 684.3501        |
|         | 652.3664        | 326.6869        | 6  | Q      | 12 | 1254.6089       | 627.8081        |
|         | 765.4505        | 383.2289        | 7  | L      | 11 | 1126.5504       | 563.7788        |
|         | 852.4825        | 426.7449        | 8  | S      | 10 | 1013.4663       | 507.2368        |
|         | 967.5095        | 484.2584        | 9  | D      | 9  | 926.4343        | 463.7208        |
|         | 1024.5309       | 512.7691        | 10 | G      | 8  | 811.4073        | 406.2073        |
|         | 1152.6259       | 576.8166        | 11 | K      | 7  | 754.3859        | 377.6966        |
|         | 1223.6630       | 612.3351        | 12 | A      | 6  | 626.2909        | 313.6491        |
|         | 1336.7471       | 668.8772        | 13 | I      | 5  | 555.2538        | 278.1305        |
|         | 1503.7454       | 752.3764        | 14 | S[167] | 4  | 442.1697        | 221.5885        |
|         | 1574.7825       | 787.8949        | 15 | A      | 3  | 275.1714        | 138.0893        |
|         | 1631.8040       | 816.4056        | 16 | G      | 2  | 204.1343        | 102.5708        |
|         |                 |                 | 17 | K      | 1  | 147.1128        | 74.0600         |

# Annotated spectra from Saleem et. al. 2009

R.ELDVS<sub>167</sub>-AES<sub>167</sub>-LTK<sub>136</sub>-R/2

0.9979

1e+04

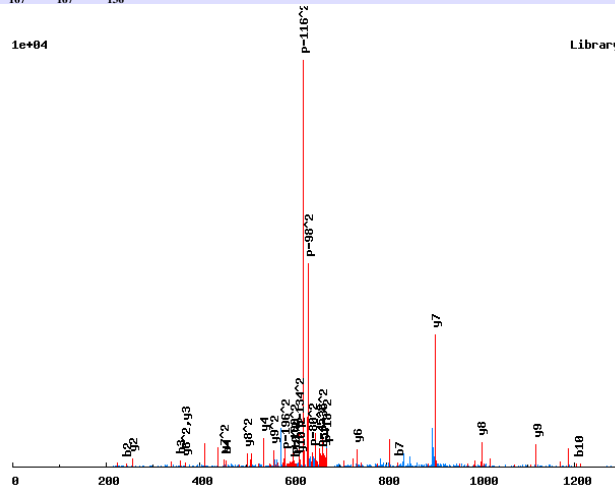

| Library | b <sup>1+</sup> | b <sup>2+</sup> | #  | AA     | #  | y <sup>1+</sup> | y <sup>2+</sup> |
|---------|-----------------|-----------------|----|--------|----|-----------------|-----------------|
|         | 130.0499        | 65.5286         | 1  | E      | 11 |                 |                 |
|         | 243.1339        | 122.0706        | 2  | L      | 10 | 1230.5146       | 615.7609        |
|         | 358.1609        | 179.5841        | 3  | D      | 9  | 1117.4305       | 559.2189        |
|         | 457.2293        | 229.1183        | 4  | V      | 8  | 1002.4036       | 501.7054        |
|         | 624.2276        | 312.6175        | 5  | S[167] | 7  | 903.3352        | 452.1712        |
|         | 695.2648        | 348.1360        | 6  | A      | 6  | 736.3368        | 368.6720        |
|         | 824.3073        | 412.6573        | 7  | E      | 5  | 665.2997        | 333.1535        |
|         | 991.3057        | 496.1565        | 8  | S[167] | 4  | 536.2571        | 268.6322        |
|         | 1104.3898       | 552.6985        | 9  | L      | 3  | 369.2587        | 185.1330        |
|         | 1205.4374       | 603.2224        | 10 | T      | 2  | 256.1747        | 128.5910        |
|         |                 |                 | 11 | K[136] | 1  | 155.1270        | 78.0671         |



# Annotated spectra from Saleem et. al. 2009

K.ELGTANGT<sub>181</sub>GHST<sub>181</sub>PLSK.L/2

0.7776

1e+04

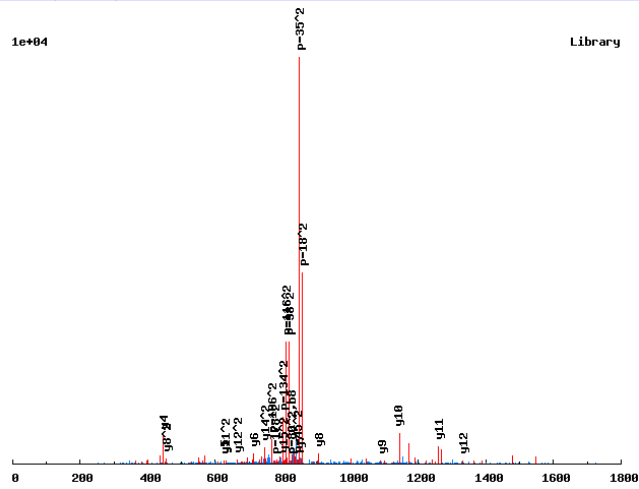

| Library | b <sup>1+</sup> | b <sup>2+</sup> | #  | AA     | #  | y <sup>1+</sup> | y <sup>2+</sup> |
|---------|-----------------|-----------------|----|--------|----|-----------------|-----------------|
|         | 130.0499        | 65.5286         | 1  | E      | 16 |                 |                 |
|         | 243.1339        | 122.0706        | 2  | L      | 15 | 1600.6768       | 800.8420        |
|         | 300.1554        | 150.5813        | 3  | G      | 14 | 1487.5927       | 744.3000        |
|         | 401.2031        | 201.1052        | 4  | T      | 13 | 1430.5713       | 715.7893        |
|         | 472.2402        | 236.6237        | 5  | A      | 12 | 1329.5236       | 665.2654        |
|         | 586.2831        | 293.6452        | 6  | N      | 11 | 1258.4865       | 629.7469        |
|         | 643.3046        | 322.1559        | 7  | G      | 10 | 1144.4435       | 572.7254        |
|         | 824.3186        | 412.6629        | 8  | T[181] | 9  | 1087.4221       | 544.2147        |
|         | 881.3400        | 441.1737        | 9  | G      | 8  | 906.4081        | 453.7077        |
|         | 1018.3990       | 509.7031        | 10 | H      | 7  | 849.3866        | 425.1969        |
|         | 1105.4310       | 553.2191        | 11 | S      | 6  | 712.3277        | 356.6675        |
|         | 1286.4450       | 643.7261        | 12 | T[181] | 5  | 625.2957        | 313.1515        |
|         | 1383.4978       | 692.2525        | 13 | P      | 4  | 444.2817        | 222.6445        |
|         | 1496.5818       | 748.7945        | 14 | L      | 3  | 347.2289        | 174.1181        |
|         | 1583.6138       | 792.3106        | 15 | S      | 2  | 234.1448        | 117.5761        |
|         |                 |                 | 16 | K      | 1  | 147.1128        | 74.0600         |

# Annotated spectra from Saleem et. al. 2009

K.ELS<sub>167</sub>AEKEAQADAAAEIAEDAAEADAGKPK.T/3

0.9988

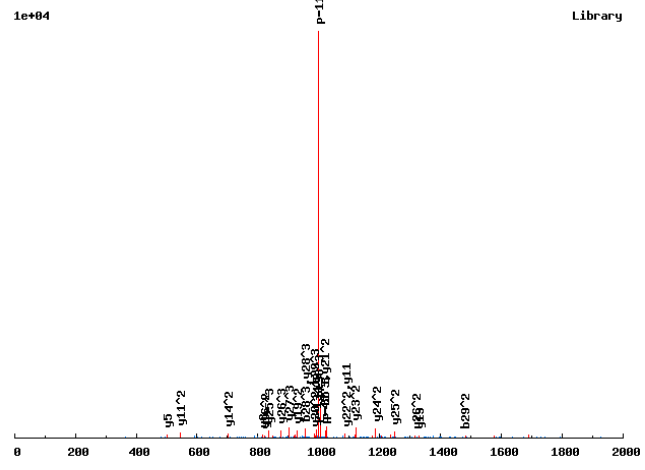

| Library | b <sup>1+</sup> | b <sup>2+</sup> | b <sup>3+</sup> | #  | AA     | #  | y <sup>1+</sup> | y <sup>2+</sup> | y <sup>3+</sup> |
|---------|-----------------|-----------------|-----------------|----|--------|----|-----------------|-----------------|-----------------|
|         | 130.0499        | 65.5286         | 44.0215         | 1  | E      | 30 |                 |                 |                 |
|         | 243.1339        | 122.0706        | 81.7162         | 2  | L      | 29 | 2979.3466       | 1490.1769       | 993.7870        |
|         | 410.1323        | 205.5698        | 137.3823        | 3  | S[167] | 28 | 2866.2625       | 1433.6349       | 956.0924        |
|         | 481.1694        | 241.0883        | 161.0613        | 4  | A      | 27 | 2699.2641       | 1350.1357       | 900.4262        |
|         | 610.2120        | 305.6096        | 204.0755        | 5  | E      | 26 | 2628.2270       | 1314.6172       | 876.7472        |
|         | 738.3070        | 369.6571        | 246.7738        | 6  | K      | 25 | 2499.1844       | 1250.0959       | 833.7330        |
|         | 867.3495        | 434.1784        | 289.7880        | 7  | E      | 24 | 2371.0895       | 1186.0484       | 791.0347        |
|         | 938.3867        | 469.6970        | 313.4671        | 8  | A      | 23 | 2242.0469       | 1121.5271       | 748.0205        |
|         | 1066.4452       | 533.7263        | 356.1533        | 9  | Q      | 22 | 2171.0098       | 1086.0085       | 724.3414        |
|         | 1137.4823       | 569.2448        | 379.8323        | 10 | A      | 21 | 2042.9512       | 1021.9792       | 681.6553        |
|         | 1252.5093       | 626.7583        | 418.1746        | 11 | D      | 20 | 1971.9141       | 986.4607        | 657.9762        |
|         | 1323.5464       | 662.2768        | 441.8537        | 12 | A      | 19 | 1856.8872       | 928.9472        | 619.6339        |
|         | 1394.5835       | 697.7954        | 465.5327        | 13 | A      | 18 | 1785.8500       | 893.4287        | 595.9549        |
|         | 1465.6206       | 733.3139        | 489.2117        | 14 | A      | 17 | 1714.8129       | 857.9101        | 572.2758        |
|         | 1594.6632       | 797.8352        | 532.2259        | 15 | E      | 16 | 1643.7758       | 822.3916        | 548.5968        |
|         | 1707.7473       | 854.3773        | 569.9206        | 16 | I      | 15 | 1514.7332       | 757.8703        | 505.5826        |
|         | 1778.7844       | 889.8958        | 593.5996        | 17 | A      | 14 | 1401.6492       | 701.3282        | 467.8879        |
|         | 1907.8270       | 954.4171        | 636.6138        | 18 | E      | 13 | 1330.6121       | 665.8097        | 444.2089        |
|         | 2022.8539       | 1011.9306       | 674.9562        | 19 | D      | 12 | 1201.5695       | 601.2884        | 401.1947        |
|         | 2093.8910       | 1047.4491       | 698.6352        | 20 | A      | 11 | 1086.5425       | 543.7749        | 362.8524        |
|         | 2164.9281       | 1082.9677       | 722.3142        | 21 | A      | 10 | 1015.5054       | 508.2564        | 339.1733        |
|         | 2293.9707       | 1147.4890       | 765.3284        | 22 | E      | 9  | 944.4683        | 472.7378        | 315.4943        |
|         | 2365.0078       | 1183.0076       | 789.0075        | 23 | A      | 8  | 815.4257        | 408.2165        | 272.4801        |
|         | 2494.0504       | 1247.5288       | 832.0217        | 24 | E      | 7  | 744.3886        | 372.6980        | 248.8011        |
|         | 2609.0774       | 1305.0423       | 870.3640        | 25 | D      | 6  | 615.3460        | 308.1767        | 205.7869        |
|         | 2680.1145       | 1340.5609       | 894.0430        | 26 | A      | 5  | 500.3191        | 250.6632        | 167.4445        |
|         | 2737.1359       | 1369.0716       | 913.0502        | 27 | G      | 4  | 429.2820        | 215.1446        | 143.7655        |
|         | 2865.2309       | 1433.1191       | 955.7485        | 28 | K      | 3  | 372.2605        | 186.6339        | 124.7584        |
|         | 2962.2836       | 1481.6455       | 988.0994        | 29 | P      | 2  | 244.1656        | 122.5864        | 82.0600         |
|         |                 |                 |                 | 30 | K      | 1  | 147.1128        | 74.0600         | 49.7091         |

# Annotated spectra from Saleem et. al. 2009

R.ELTLDENAS<sub>167</sub>LDS<sub>167</sub>EK<sub>136</sub>QLNPR<sub>166</sub>I/3

0.9775

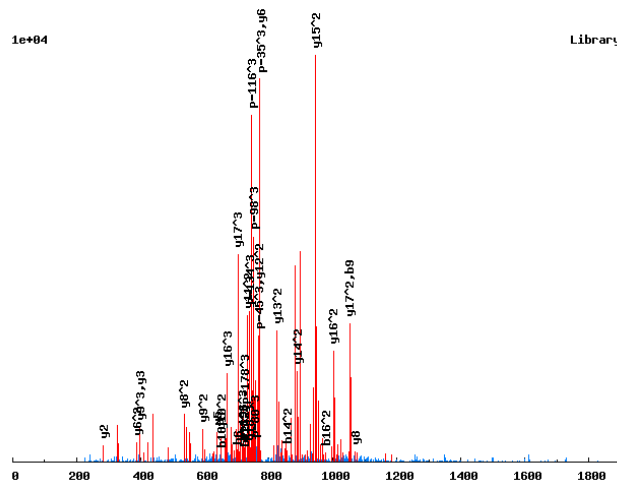

| Library | b <sup>1+</sup> | b <sup>2+</sup> | b <sup>3+</sup> | #  | AA     | #  | y <sup>1+</sup> | y <sup>2+</sup> | y <sup>3+</sup> |
|---------|-----------------|-----------------|-----------------|----|--------|----|-----------------|-----------------|-----------------|
|         | 130.0499        | 65.5286         | 44.0215         | 1  | E      | 19 |                 |                 |                 |
|         | 243.1339        | 122.0706        | 81.7162         | 2  | L      | 18 | 2220.9904       | 1110.9988       | 741.0016        |
|         | 344.1816        | 172.5944        | 115.3987        | 3  | T      | 17 | 2107.9063       | 1054.4568       | 703.3070        |
|         | 457.2657        | 229.1365        | 153.0934        | 4  | L      | 16 | 2006.8586       | 1003.9330       | 669.6244        |
|         | 572.2926        | 286.6499        | 191.4357        | 5  | D      | 15 | 1893.7746       | 947.3909        | 631.9297        |
|         | 701.3352        | 351.1712        | 234.4499        | 6  | E      | 14 | 1778.7477       | 889.8775        | 593.5874        |
|         | 815.3781        | 408.1927        | 272.4642        | 7  | N      | 13 | 1649.7051       | 825.3562        | 550.5732        |
|         | 886.4152        | 443.7113        | 296.1433        | 8  | A      | 12 | 1535.6621       | 768.3347        | 512.5589        |
|         | 1053.4136       | 527.2104        | 351.8094        | 9  | S[167] | 11 | 1464.6250       | 732.8161        | 488.8799        |
|         | 1166.4977       | 583.7525        | 389.5041        | 10 | L      | 10 | 1297.6267       | 649.3170        | 433.2137        |
|         | 1281.5246       | 641.2659        | 427.8464        | 11 | D      | 9  | 1184.5426       | 592.7749        | 395.5191        |
|         | 1448.5230       | 724.7651        | 483.5125        | 12 | S[167] | 8  | 1069.5157       | 535.2615        | 357.1767        |
|         | 1577.5656       | 789.2864        | 526.5267        | 13 | E      | 7  | 902.5173        | 451.7623        | 301.5106        |
|         | 1713.6747       | 857.3410        | 571.8964        | 14 | K[136] | 6  | 773.4747        | 387.2410        | 258.4964        |
|         | 1841.7333       | 921.3703        | 614.5826        | 15 | Q      | 5  | 637.3655        | 319.1864        | 213.1267        |
|         | 1954.8174       | 977.9123        | 652.2773        | 16 | L      | 4  | 509.3070        | 255.1571        | 170.4405        |
|         | 2068.8603       | 1034.9338       | 690.2916        | 17 | N      | 3  | 396.2229        | 198.6151        | 132.7458        |
|         | 2165.9130       | 1083.4602       | 722.6425        | 18 | P      | 2  | 282.1800        | 141.5936        | 94.7315         |
|         |                 |                 |                 | 19 | R[166] | 1  | 185.1272        | 93.0672         | 62.3806         |

# Annotated spectra from Saleem et. al. 2009

K.EMT<sub>181</sub>EK.G/2

0.6831

1e+04

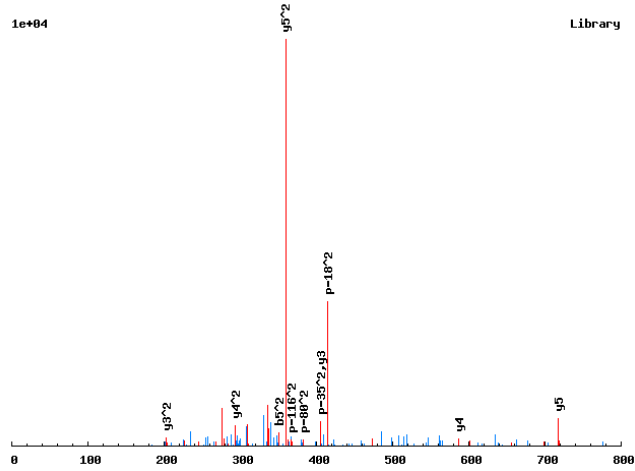

| Library | b <sup>1+</sup> | b <sup>2+</sup> | # | AA     | # | y <sup>1+</sup> | y <sup>2+</sup> |
|---------|-----------------|-----------------|---|--------|---|-----------------|-----------------|
|         | 130.0499        | 65.5286         | 1 | E      | 6 |                 |                 |
|         | 261.0904        | 131.0488        | 2 | M      | 5 | 717.2525        | 359.1299        |
|         | 442.1044        | 221.5558        | 3 | T[181] | 4 | 586.2120        | 293.6096        |
|         | 571.1470        | 286.0771        | 4 | E      | 3 | 405.1980        | 203.1026        |
|         | 700.1896        | 350.5984        | 5 | E      | 2 | 276.1554        | 138.5813        |
|         |                 |                 | 6 | K      | 1 | 147.1128        | 74.0600         |

# Annotated spectra from Saleem et. al. 2009

R.ENDFEDELAES<sub>167</sub>MQS<sub>167</sub>YNRETADK.L/3

0.9713

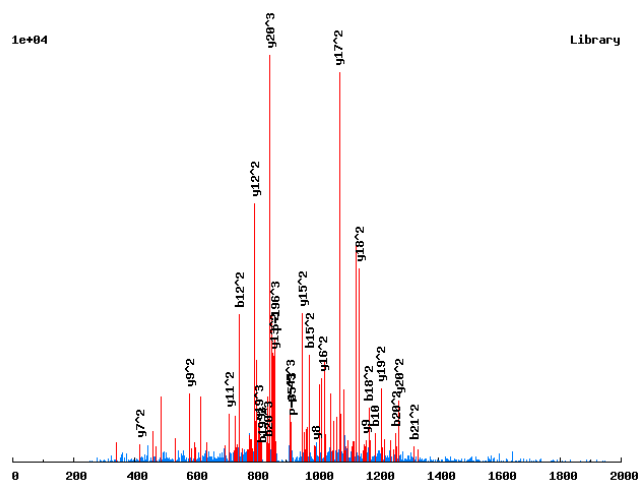

| Library | b <sup>1+</sup>  | b <sup>2+</sup>  | b <sup>3+</sup> | #  | AA     | #  | y <sup>1+</sup>  | y <sup>2+</sup>  | y <sup>3+</sup> |
|---------|------------------|------------------|-----------------|----|--------|----|------------------|------------------|-----------------|
|         | 130.0499         | 65.5286          | 44.0215         | 1  | E      | 22 |                  |                  |                 |
|         | 244.0928         | 122.5500         | 82.0358         | 2  | N      | 21 | 2651.9844        | 1326.4959        | 884.6663        |
|         | 359.1197         | 180.0635         | 120.3781        | 3  | D      | 20 | 2537.9415        | <b>1269.4744</b> | <b>846.6520</b> |
|         | 506.1881         | 253.5977         | 169.4009        | 4  | F      | 19 | 2422.9146        | <b>1211.9609</b> | <b>808.3097</b> |
|         | 635.2307         | 318.1190         | 212.4151        | 5  | E      | 18 | 2275.8462        | <b>1138.4267</b> | 759.2869        |
|         | 750.2577         | 375.6325         | 250.7574        | 6  | D      | 17 | 2146.8036        | <b>1073.9054</b> | 716.2727        |
|         | 879.3003         | 440.1538         | 293.7716        | 7  | E      | 16 | 2031.7766        | <b>1016.3920</b> | 677.9304        |
|         | 992.3843         | 496.6958         | 331.4663        | 8  | L      | 15 | 1902.7340        | <b>951.8707</b>  | 634.9162        |
|         | 1063.4214        | 532.2144         | 355.1453        | 9  | A      | 14 | 1789.6500        | 895.3286         | 597.2215        |
|         | <b>1192.4640</b> | 596.7357         | 398.1595        | 10 | E      | 13 | 1718.6129        | <b>859.8101</b>  | 573.5425        |
|         | 1359.4624        | 680.2348         | 453.8257        | 11 | S[167] | 12 | 1589.5703        | <b>795.2888</b>  | 530.5283        |
|         | 1490.5029        | <b>745.7551</b>  | 497.5058        | 12 | M      | 11 | 1422.5719        | <b>711.7896</b>  | 474.8622        |
|         | 1618.5615        | 809.7844         | 540.1920        | 13 | Q      | 10 | 1291.5314        | 646.2694         | 431.1820        |
|         | 1785.5598        | 893.2836         | 595.8581        | 14 | S[167] | 9  | <b>1163.4729</b> | <b>582.2401</b>  | 388.4958        |
|         | 1948.6232        | <b>974.8152</b>  | 650.2126        | 15 | Y      | 8  | <b>996.4745</b>  | 498.7409         | 332.8297        |
|         | 2062.6661        | 1031.8367        | 688.2269        | 16 | N      | 7  | 833.4112         | <b>417.2092</b>  | 278.4752        |
|         | 2218.7672        | 1109.8872        | 740.2606        | 17 | R      | 6  | 719.3682         | 360.1878         | 240.4609        |
|         | 2347.8098        | <b>1174.4085</b> | 783.2748        | 18 | E      | 5  | 563.2671         | 282.1372         | 188.4272        |
|         | 2448.8575        | 1224.9324        | <b>816.9573</b> | 19 | T      | 4  | 434.2245         | 217.6159         | 145.4130        |
|         | 2519.8946        | <b>1260.4509</b> | <b>840.6364</b> | 20 | A      | 3  | 333.1768         | 167.0921         | 111.7305        |
|         | 2634.9215        | <b>1317.9644</b> | 878.9787        | 21 | D      | 2  | 262.1397         | 131.5735         | 88.0514         |
|         |                  |                  |                 | 22 | K      | 1  | 147.1128         | 74.0600          | 49.7091         |

# Annotated spectra from Saleem et. al. 2009

K.ENES<sub>167</sub>SEGDK.G/3

0.9058

1e+04

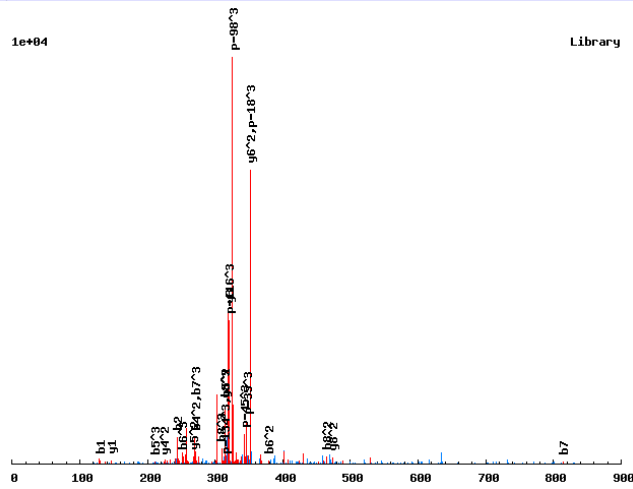

| Library | b <sup>1+</sup> | b <sup>2+</sup> | b <sup>3+</sup> | # | AA     | # | y <sup>1+</sup> | y <sup>2+</sup> | y <sup>3+</sup> |
|---------|-----------------|-----------------|-----------------|---|--------|---|-----------------|-----------------|-----------------|
|         | 130.0499        | 65.5286         | 44.0215         | 1 | E      | 9 |                 |                 |                 |
|         | 244.0928        | 122.5500        | 82.0358         | 2 | N      | 8 | 945.3197        | 473.1635        | 315.7781        |
|         | 373.1354        | 187.0713        | 125.0500        | 3 | E      | 7 | 831.2768        | 416.1420        | 277.7638        |
|         | 540.1338        | 270.5705        | 180.7161        | 4 | S[167] | 6 | 702.2342        | 351.6207        | 234.7496        |
|         | 627.1658        | 314.0865        | 209.7268        | 5 | S      | 5 | 535.2358        | 268.1216        | 179.0835        |
|         | 756.2084        | 378.6078        | 252.7410        | 6 | E      | 4 | 448.2038        | 224.6055        | 150.0728        |
|         | 813.2298        | 407.1186        | 271.7481        | 7 | G      | 3 | 319.1612        | 160.0842        | 107.0586        |
|         | 928.2568        | 464.6320        | 310.0904        | 8 | D      | 2 | 262.1397        | 131.5735        | 88.0514         |
|         |                 |                 |                 | 9 | K      | 1 | 147.1128        | 74.0600         | 49.7091         |

# Annotated spectra from Saleem et. al. 2009

K.ENGSL<sub>167</sub>GDDLFLAGLK.K/2

0.9591

1e+04

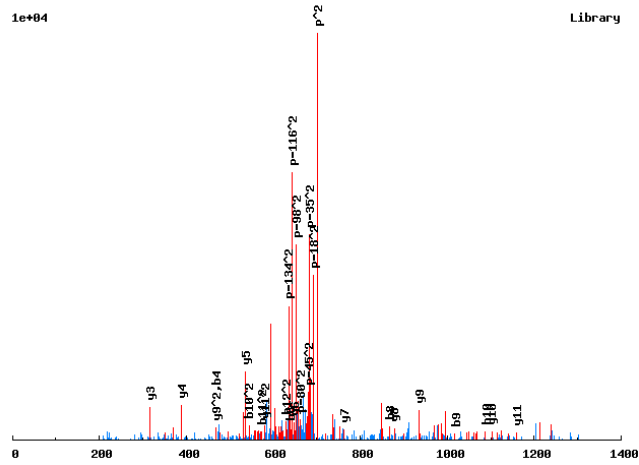

| Library | b <sup>1+</sup> | b <sup>2+</sup> | #  | AA     | #  | y <sup>1+</sup> | y <sup>2+</sup> |
|---------|-----------------|-----------------|----|--------|----|-----------------|-----------------|
|         | 130.0499        | 65.5286         | 1  | E      | 13 |                 |                 |
|         | 244.0928        | 122.5500        | 2  | N      | 12 | 1273.5460       | 637.2766        |
|         | 301.1143        | 151.0608        | 3  | G      | 11 | 1159.5031       | 580.2552        |
|         | 468.1126        | 234.5600        | 4  | S[167] | 10 | 1102.4816       | 551.7444        |
|         | 525.1341        | 263.0707        | 5  | G      | 9  | 935.4832        | 468.2453        |
|         | 640.1610        | 320.5842        | 6  | D      | 8  | 878.4618        | 439.7345        |
|         | 755.1880        | 378.0976        | 7  | D      | 7  | 763.4348        | 382.2211        |
|         | 868.2720        | 434.6397        | 8  | L      | 6  | 648.4079        | 324.7076        |
|         | 1015.3404       | 508.1739        | 9  | F      | 5  | 535.3238        | 268.1656        |
|         | 1086.3775       | 543.6924        | 10 | A      | 4  | 388.2554        | 194.6314        |
|         | 1143.3990       | 572.2031        | 11 | G      | 3  | 317.2183        | 159.1128        |
|         | 1256.4831       | 628.7452        | 12 | L      | 2  | 260.1969        | 130.6021        |
|         |                 |                 | 13 | K      | 1  | 147.1128        | 74.0600         |

# Annotated spectra from Saleem et. al. 2009

K.ENY<sub>243</sub>TFESHPGT<sub>181</sub>PVSSSLM<sub>147</sub>TQR<sub>166</sub>PGAESSLK<sub>136</sub>S/3

0.9992

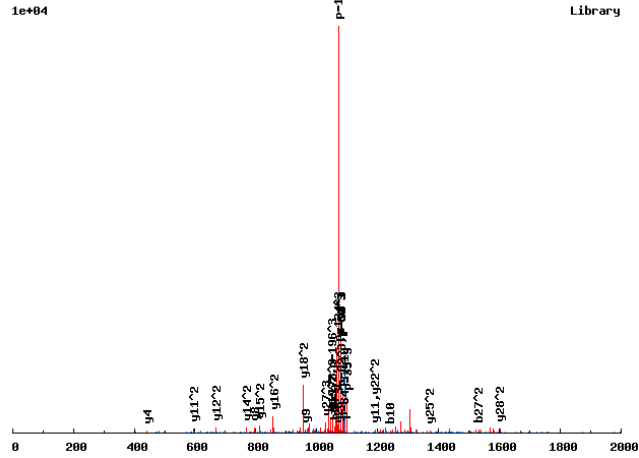

| Library | b <sup>1+</sup> | b <sup>2+</sup> | b <sup>3+</sup> | #  | AA      | #  | y <sup>1+</sup> | y <sup>2+</sup> | y <sup>3+</sup> |
|---------|-----------------|-----------------|-----------------|----|---------|----|-----------------|-----------------|-----------------|
|         | 130.0499        | 65.5286         | 44.0215         | 1  | E       | 29 |                 |                 |                 |
|         | 244.0928        | 122.5500        | 82.0358         | 2  | N       | 28 | 3202.3918       | 1601.6996       | 1068.1355       |
|         | 487.1225        | 244.0649        | 163.0457        | 3  | Y [243] | 27 | 3088.3489       | 1544.6781       | 1030.1212       |
|         | 588.1701        | 294.5887        | 196.7282        | 4  | T       | 26 | 2845.3192       | 1423.1633       | 949.1113        |
|         | 735.2386        | 368.1229        | 245.7510        | 5  | F       | 25 | 2744.2716       | 1372.6394       | 915.4287        |
|         | 864.2811        | 432.6442        | 288.7652        | 6  | E       | 24 | 2597.2032       | 1299.1052       | 866.4059        |
|         | 951.3132        | 476.1602        | 317.7759        | 7  | S       | 23 | 2468.1606       | 1234.5839       | 823.3917        |
|         | 1088.3721       | 544.6897        | 363.4622        | 8  | H       | 22 | 2381.1285       | 1191.0679       | 794.3810        |
|         | 1185.4248       | 593.2161        | 395.8131        | 9  | P       | 21 | 2244.0696       | 1122.5385       | 748.6947        |
|         | 1242.4463       | 621.7268        | 414.8203        | 10 | G       | 20 | 2147.0169       | 1074.0121       | 716.3438        |
|         | 1423.4603       | 712.2338        | 475.1583        | 11 | T [181] | 19 | 2089.9954       | 1045.5013       | 697.3367        |
|         | 1520.5131       | 760.7602        | 507.5092        | 12 | P       | 18 | 1908.9814       | 954.9943        | 636.9987        |
|         | 1619.5815       | 810.2944        | 540.5320        | 13 | V       | 17 | 1811.9286       | 906.4680        | 604.6477        |
|         | 1706.6135       | 853.8104        | 569.5427        | 14 | S       | 16 | 1712.8602       | 856.9338        | 571.6249        |
|         | 1793.6455       | 897.3264        | 598.5534        | 15 | S       | 15 | 1625.8282       | 813.4177        | 542.6143        |
|         | 1880.6776       | 940.8424        | 627.5640        | 16 | S       | 14 | 1538.7962       | 769.9017        | 513.6036        |
|         | 1993.7616       | 997.3845        | 665.2587        | 17 | L       | 13 | 1451.7641       | 726.3857        | 484.5929        |
|         | 2140.7970       | 1070.9022       | 714.2705        | 18 | M [147] | 12 | 1338.6801       | 669.8437        | 446.8982        |
|         | 2241.8447       | 1121.4260       | 747.9531        | 19 | T       | 11 | 1191.6447       | 596.3260        | 397.8864        |
|         | 2369.9033       | 1185.4553       | 790.6393        | 20 | Q       | 10 | 1090.5970       | 545.8021        | 364.2039        |
|         | 2536.0127       | 1268.5100       | 846.0091        | 21 | R [166] | 9  | 962.5384        | 481.7728        | 321.5177        |
|         | 2633.0654       | 1317.0364       | 878.3600        | 22 | P       | 8  | 796.4290        | 398.7182        | 266.1479        |
|         | 2690.0869       | 1345.5471       | 897.3672        | 23 | G       | 7  | 699.3763        | 350.1918        | 233.7969        |
|         | 2761.1240       | 1381.0656       | 921.0462        | 24 | A       | 6  | 642.3548        | 321.6810        | 214.7898        |
|         | 2890.1666       | 1445.5869       | 964.0604        | 25 | E       | 5  | 571.3177        | 286.1625        | 191.1108        |
|         | 2977.1986       | 1489.1030       | 993.0711        | 26 | S       | 4  | 442.2751        | 221.6412        | 148.0966        |
|         | 3064.2307       | 1532.6190       | 1022.0817       | 27 | S       | 3  | 355.2431        | 178.1252        | 119.0859        |
|         | 3177.3147       | 1589.1610       | 1059.7764       | 28 | L       | 2  | 268.2111        | 134.6092        | 90.0752         |
|         |                 |                 |                 | 29 | K [136] | 1  | 155.1270        | 78.0671         | 52.3805         |



# Annotated spectra from Saleem et. al. 2009

K.EPVKT<sub>181</sub>PS<sub>167</sub>PAPAAK.I/2

0.8669

1e+04

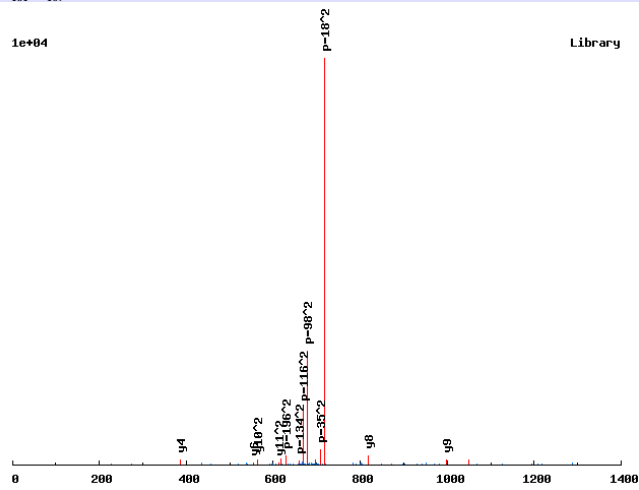

| Library | b <sup>1+</sup> | b <sup>2+</sup> | #  | AA     | #  | y <sup>1+</sup> | y <sup>2+</sup> |
|---------|-----------------|-----------------|----|--------|----|-----------------|-----------------|
|         | 130.0499        | 65.5286         | 1  | E      | 13 |                 |                 |
|         | 227.1026        | 114.0550        | 2  | P      | 12 | 1323.6109       | 662.3091        |
|         | 326.1710        | 163.5892        | 3  | V      | 11 | 1226.5582       | 613.7827        |
|         | 454.2660        | 227.6366        | 4  | K      | 10 | 1127.4897       | 564.2485        |
|         | 635.2800        | 318.1436        | 5  | T[181] | 9  | 999.3948        | 500.2010        |
|         | 732.3328        | 366.6700        | 6  | P      | 8  | 818.3808        | 409.6940        |
|         | 899.3311        | 450.1692        | 7  | S[167] | 7  | 721.3280        | 361.1676        |
|         | 996.3839        | 498.6956        | 8  | P      | 6  | 554.3297        | 277.6685        |
|         | 1067.4210       | 534.2141        | 9  | A      | 5  | 457.2769        | 229.1421        |
|         | 1164.4738       | 582.7405        | 10 | P      | 4  | 386.2398        | 193.6235        |
|         | 1235.5109       | 618.2591        | 11 | A      | 3  | 289.1870        | 145.0971        |
|         | 1306.5480       | 653.7776        | 12 | A      | 2  | 218.1499        | 109.5786        |
|         |                 |                 | 13 | K      | 1  | 147.1128        | 74.0600         |

# Annotated spectra from Saleem et. al. 2009

K.E<sub>111</sub>QAEAS<sub>167</sub>IDNLKNEAT<sub>181</sub>PEAEQVK.K/3

0.9293

1e+04

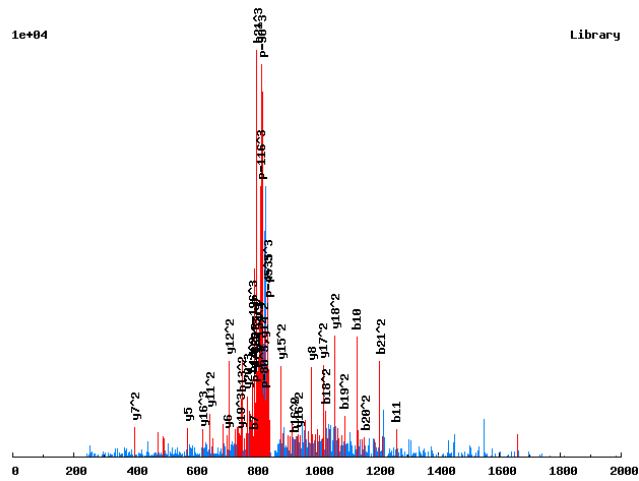

| Library | b <sup>1+</sup> | b <sup>2+</sup> | b <sup>3+</sup> | #  | AA      | #  | y <sup>1+</sup> | y <sup>2+</sup> | y <sup>3+</sup> |
|---------|-----------------|-----------------|-----------------|----|---------|----|-----------------|-----------------|-----------------|
|         | 112.0393        | 56.5233         | 38.0180         | 1  | E [111] | 22 |                 |                 |                 |
|         | 240.0979        | 120.5526        | 80.7041         | 2  | Q       | 21 | 2445.0582       | 1223.0327       | 815.6909        |
|         | 311.1350        | 156.0711        | 104.3832        | 3  | A       | 20 | 2316.9996       | 1159.0034       | 773.0047        |
|         | 440.1776        | 220.5924        | 147.3974        | 4  | E       | 19 | 2245.9625       | 1123.4849       | 749.3257        |
|         | 511.2147        | 256.1110        | 171.0764        | 5  | A       | 18 | 2116.9199       | 1058.9636       | 706.3115        |
|         | 678.2131        | 339.6102        | 226.7425        | 6  | S [167] | 17 | 2045.8828       | 1023.4450       | 682.6325        |
|         | 791.2971        | 396.1522        | 264.4372        | 7  | I       | 16 | 1878.8844       | 939.9459        | 626.9663        |
|         | 906.3241        | 453.6657        | 302.7795        | 8  | D       | 15 | 1765.8004       | 883.4038        | 589.2716        |
|         | 1020.3670       | 510.6871        | 340.7938        | 9  | N       | 14 | 1650.7734       | 825.8904        | 550.9293        |
|         | 1133.4510       | 567.2292        | 378.4885        | 10 | L       | 13 | 1536.7305       | 768.8689        | 512.9150        |
|         | 1261.5460       | 631.2766        | 421.1869        | 11 | K       | 12 | 1423.6464       | 712.3269        | 475.2203        |
|         | 1375.5889       | 688.2981        | 459.2012        | 12 | N       | 11 | 1295.5515       | 648.2794        | 432.5220        |
|         | 1504.6315       | 752.8194        | 502.2154        | 13 | E       | 10 | 1181.5086       | 591.2579        | 394.5077        |
|         | 1575.6686       | 788.3380        | 525.8944        | 14 | A       | 9  | 1052.4660       | 526.7366        | 351.4935        |
|         | 1756.6826       | 878.8450        | 586.2324        | 15 | T [181] | 8  | 981.4289        | 491.2181        | 327.8145        |
|         | 1853.7354       | 927.3713        | 618.5833        | 16 | P       | 7  | 800.4148        | 400.7111        | 267.4765        |
|         | 1982.7780       | 991.8926        | 661.5975        | 17 | E       | 6  | 703.3621        | 352.1847        | 235.1255        |
|         | 2053.8151       | 1027.4112       | 685.2766        | 18 | A       | 5  | 574.3195        | 287.6634        | 192.1114        |
|         | 2182.8577       | 1091.9325       | 728.2908        | 19 | E       | 4  | 503.2824        | 252.1448        | 168.4323        |
|         | 2310.9163       | 1155.9618       | 770.9769        | 20 | Q       | 3  | 374.2398        | 187.6235        | 125.4181        |
|         | 2409.9847       | 1205.4960       | 803.9997        | 21 | V       | 2  | 246.1812        | 123.5942        | 82.7319         |
|         |                 |                 |                 | 22 | K       | 1  | 147.1128        | 74.0600         | 49.7091         |

# Annotated spectra from Saleem et. al. 2009

K.EQAEAS<sub>167</sub>IDNLK<sub>136</sub>NEATPEAEQVK<sub>136</sub>K<sub>136</sub>E/3

0.8563

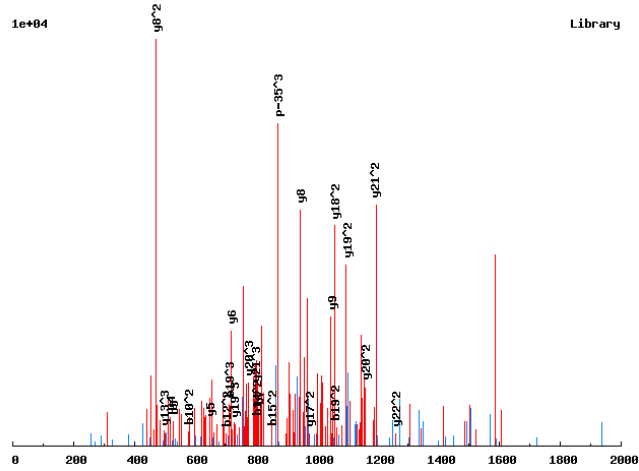

| Library | b <sup>1+</sup> | b <sup>2+</sup>  | b <sup>3+</sup> | #  | AA     | #  | y <sup>1+</sup>  | y <sup>2+</sup>  | y <sup>3+</sup> |
|---------|-----------------|------------------|-----------------|----|--------|----|------------------|------------------|-----------------|
|         | 130.0499        | 65.5286          | 44.0215         | 1  | E      | 23 |                  |                  |                 |
|         | 258.1085        | 129.5579         | 86.7077         | 2  | Q      | 22 | 2517.2294        | <b>1259.1183</b> | 839.7480        |
|         | 329.1456        | 165.0764         | 110.3867        | 3  | A      | 21 | 2389.1708        | <b>1195.0891</b> | <b>797.0618</b> |
|         | 458.1882        | 229.5977         | 153.4009        | 4  | E      | 20 | 2318.1337        | <b>1159.5705</b> | <b>773.3828</b> |
|         | <b>529.2253</b> | 265.1163         | 177.0799        | 5  | A      | 19 | 2189.0911        | <b>1095.0492</b> | <b>730.3686</b> |
|         | 696.2236        | 348.6155         | 232.7461        | 6  | S[167] | 18 | 2118.0540        | <b>1059.5306</b> | 706.6895        |
|         | <b>809.3077</b> | 405.1575         | 270.4407        | 7  | I      | 17 | 1951.0557        | <b>976.0315</b>  | 651.0234        |
|         | 924.3346        | 462.6710         | 308.7831        | 8  | D      | 16 | 1837.9716        | 919.4894         | 613.3287        |
|         | 1038.3776       | 519.6924         | 346.7974        | 9  | N      | 15 | 1722.9447        | 861.9760         | 574.9864        |
|         | 1151.4616       | <b>576.2344</b>  | 384.4921        | 10 | L      | 14 | 1608.9017        | 804.9545         | 536.9721        |
|         | 1287.5708       | 644.2890         | 429.8618        | 11 | K[136] | 13 | 1495.8177        | 748.4125         | <b>499.2774</b> |
|         | 1401.6137       | <b>701.3105</b>  | 467.8761        | 12 | N      | 12 | 1359.7085        | 680.3579         | 453.9077        |
|         | 1530.6563       | 765.8318         | 510.8903        | 13 | E      | 11 | 1245.6656        | 623.3364         | 415.8934        |
|         | 1601.6934       | <b>801.3503</b>  | 534.5693        | 14 | A      | 10 | 1116.6230        | 558.8151         | 372.8792        |
|         | 1702.7411       | <b>851.8742</b>  | 568.2519        | 15 | T      | 9  | <b>1045.5859</b> | 523.2966         | 349.2001        |
|         | 1799.7938       | 900.4006         | 600.6028        | 16 | P      | 8  | <b>944.5382</b>  | <b>472.7727</b>  | 315.5176        |
|         | 1928.8364       | 964.9219         | 643.6170        | 17 | E      | 7  | 847.4854         | 424.2464         | 283.1667        |
|         | 1999.8735       | 1000.4404        | 667.2960        | 18 | A      | 6  | <b>718.4428</b>  | 359.7251         | 240.1525        |
|         | 2128.9161       | <b>1064.9617</b> | <b>710.3102</b> | 19 | E      | 5  | <b>647.4057</b>  | 324.2065         | 216.4734        |
|         | 2256.9747       | 1128.9910        | 752.9964        | 20 | Q      | 4  | <b>518.3631</b>  | 259.6852         | 173.4592        |
|         | 2356.0431       | 1178.5252        | 786.0192        | 21 | V      | 3  | 390.3046         | 195.6559         | 130.7730        |
|         | 2492.1523       | 1246.5798        | 831.3889        | 22 | K[136] | 2  | 291.2362         | 146.1217         | 97.7502         |
|         |                 |                  |                 | 23 | K[136] | 1  | 155.1270         | 78.0671          | 52.3805         |

# Annotated spectra from Saleem et. al. 2009

R.EQDS<sub>167</sub>PHSES<sub>167</sub>SDLPPILEK<sub>136</sub>E/2

0.971

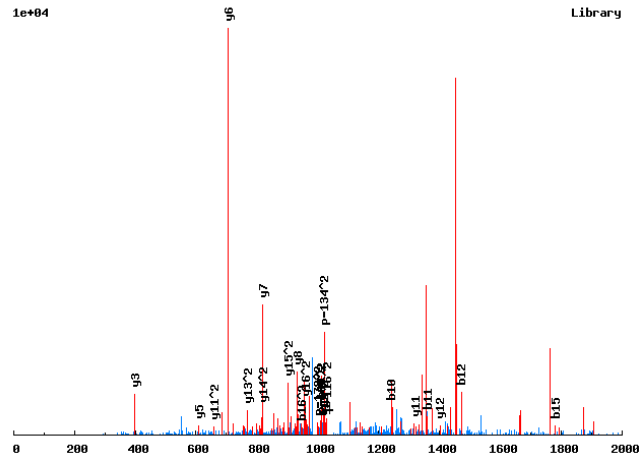

| Library | b <sup>1+</sup> | b <sup>2+</sup> | #  | AA     | #  | y <sup>1+</sup> | y <sup>2+</sup> |
|---------|-----------------|-----------------|----|--------|----|-----------------|-----------------|
|         | 130.0499        | 65.5286         | 1  | E      | 18 |                 |                 |
|         | 258.1085        | 129.5579        | 2  | Q      | 17 | 2046.8548       | 1023.9310       |
|         | 373.1354        | 187.0713        | 3  | D      | 16 | 1918.7962       | 959.9017        |
|         | 540.1338        | 270.5705        | 4  | S[167] | 15 | 1803.7693       | 902.3883        |
|         | 637.1865        | 319.0969        | 5  | P      | 14 | 1636.7709       | 818.8891        |
|         | 774.2454        | 387.6264        | 6  | H      | 13 | 1539.7181       | 770.3627        |
|         | 861.2775        | 431.1424        | 7  | S      | 12 | 1402.6592       | 701.8333        |
|         | 990.3200        | 495.6637        | 8  | E      | 11 | 1315.6272       | 658.3172        |
|         | 1157.3184       | 579.1628        | 9  | S[167] | 10 | 1186.5846       | 593.7959        |
|         | 1244.3504       | 622.6789        | 10 | S      | 9  | 1019.5863       | 510.2968        |
|         | 1359.3774       | 680.1923        | 11 | D      | 8  | 932.5542        | 466.7808        |
|         | 1472.4614       | 736.7344        | 12 | L      | 7  | 817.5273        | 409.2673        |
|         | 1569.5142       | 785.2607        | 13 | P      | 6  | 704.4432        | 352.7253        |
|         | 1666.5670       | 833.7871        | 14 | P      | 5  | 607.3905        | 304.1989        |
|         | 1779.6510       | 890.3291        | 15 | I      | 4  | 510.3377        | 255.6725        |
|         | 1892.7351       | 946.8712        | 16 | L      | 3  | 397.2536        | 199.1305        |
|         | 2021.7777       | 1011.3925       | 17 | E      | 2  | 284.1696        | 142.5884        |
|         |                 |                 | 18 | K[136] | 1  | 155.1270        | 78.0671         |

# Annotated spectra from Saleem et. al. 2009

K.EQGS<sub>167</sub>HQS<sub>167</sub>LQEHLQR<sub>166</sub>E/2

0.9391

1e+04

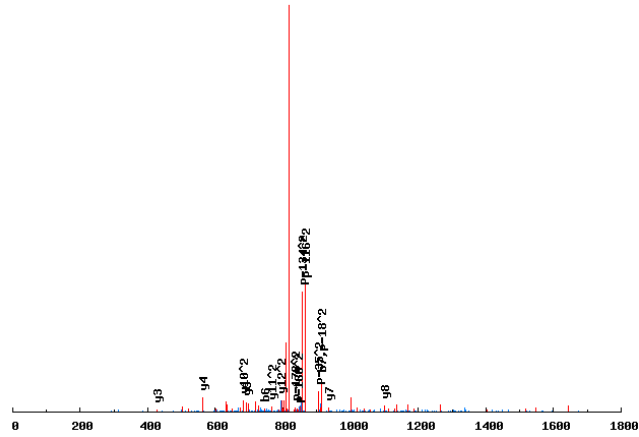

| Library | b <sup>1+</sup> | b <sup>2+</sup> | #  | AA     | #  | y <sup>1+</sup> | y <sup>2+</sup> |
|---------|-----------------|-----------------|----|--------|----|-----------------|-----------------|
|         | 130.0499        | 65.5286         | 1  | E      | 14 |                 |                 |
|         | 258.1085        | 129.5579        | 2  | Q      | 13 | 1717.7083       | 859.3578        |
|         | 315.1299        | 158.0686        | 3  | G      | 12 | 1589.6497       | 795.3285        |
|         | 482.1283        | 241.5678        | 4  | S[167] | 11 | 1532.6282       | 766.8177        |
|         | 619.1872        | 310.0972        | 5  | H      | 10 | 1365.6298       | 683.3186        |
|         | 747.2458        | 374.1265        | 6  | Q      | 9  | 1228.5709       | 614.7891        |
|         | 914.2441        | 457.6257        | 7  | S[167] | 8  | 1100.5124       | 550.7598        |
|         | 1027.3282       | 514.1677        | 8  | L      | 7  | 933.5140        | 467.2606        |
|         | 1155.3868       | 578.1970        | 9  | Q      | 6  | 820.4299        | 410.7186        |
|         | 1284.4294       | 642.7183        | 10 | E      | 5  | 692.3714        | 346.6893        |
|         | 1421.4883       | 711.2478        | 11 | H      | 4  | 563.3288        | 282.1680        |
|         | 1534.5723       | 767.7898        | 12 | L      | 3  | 426.2699        | 213.6386        |
|         | 1662.6309       | 831.8191        | 13 | Q      | 2  | 313.1858        | 157.0965        |
|         |                 |                 | 14 | R[166] | 1  | 185.1272        | 93.0672         |

# Annotated spectra from Saleem et. al. 2009

K.EQGS<sub>167</sub>HQSLQEHLQR<sub>166</sub>E/3

0.6885

1e+04

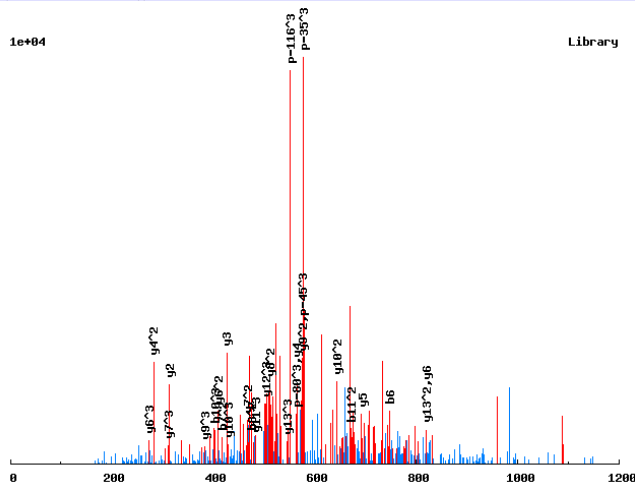

| Library | b <sup>1+</sup> | b <sup>2+</sup> | b <sup>3+</sup> | #  | AA     | #  | y <sup>1+</sup> | y <sup>2+</sup> | y <sup>3+</sup> |
|---------|-----------------|-----------------|-----------------|----|--------|----|-----------------|-----------------|-----------------|
|         | 130.0499        | 65.5286         | 44.0215         | 1  | E      | 14 |                 |                 |                 |
|         | 258.1085        | 129.5579        | 86.7077         | 2  | Q      | 13 | 1637.7419       | 819.3746        | 546.5855        |
|         | 315.1299        | 158.0686        | 105.7148        | 3  | G      | 12 | 1509.6833       | 755.3453        | 503.8993        |
|         | 482.1283        | 241.5678        | 161.3809        | 4  | S[167] | 11 | 1452.6619       | 726.8346        | 484.8921        |
|         | 619.1872        | 310.0972        | 207.0672        | 5  | H      | 10 | 1285.6635       | 643.3354        | 429.2260        |
|         | 747.2458        | 374.1265        | 249.7534        | 6  | Q      | 9  | 1148.6046       | 574.8059        | 383.5397        |
|         | 834.2778        | 417.6425        | 278.7641        | 7  | S      | 8  | 1020.5460       | 510.7767        | 340.8535        |
|         | 947.3619        | 474.1846        | 316.4588        | 8  | L      | 7  | 933.5140        | 467.2606        | 311.8429        |
|         | 1075.4204       | 538.2139        | 359.1450        | 9  | Q      | 6  | 820.4299        | 410.7186        | 274.1482        |
|         | 1204.4630       | 602.7352        | 402.1592        | 10 | E      | 5  | 692.3714        | 346.6893        | 231.4620        |
|         | 1341.5219       | 671.2646        | 447.8455        | 11 | H      | 4  | 563.3288        | 282.1680        | 188.4478        |
|         | 1454.6060       | 727.8066        | 485.5402        | 12 | L      | 3  | 426.2699        | 213.6386        | 142.7615        |
|         | 1582.6646       | 791.8359        | 528.2264        | 13 | Q      | 2  | 313.1858        | 157.0965        | 105.0668        |
|         |                 |                 |                 | 14 | R[166] | 1  | 185.1272        | 93.0672         | 62.3806         |

# Annotated spectra from Saleem et. al. 2009

K.EQLKMDADDS<sub>167</sub>S<sub>167</sub>DDEDGLNELESTPAK.I/3

0.9998

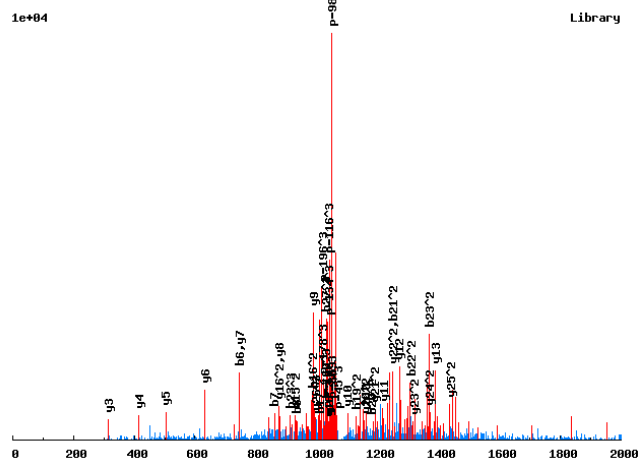

| Library | b <sup>1+</sup>  | b <sup>2+</sup>  | b <sup>3+</sup>  | #  | AA     | #  | y <sup>1+</sup>  | y <sup>2+</sup>  | y <sup>3+</sup>  |
|---------|------------------|------------------|------------------|----|--------|----|------------------|------------------|------------------|
|         | 130.0499         | 65.5286          | 44.0215          | 1  | E      | 28 |                  |                  |                  |
|         | 258.1085         | 129.5579         | 86.7077          | 2  | Q      | 27 | 3113.1701        | 1557.0887        | <b>1038.3949</b> |
|         | 371.1925         | 186.0999         | 124.4024         | 3  | L      | 26 | 2985.1115        | 1493.0594        | <b>995.7087</b>  |
|         | 499.2875         | 250.1474         | 167.1007         | 4  | K      | 25 | 2872.0275        | <b>1436.5174</b> | 958.0140         |
|         | 614.3144         | 307.6608         | 205.4430         | 5  | D      | 24 | 2743.9325        | <b>1372.4699</b> | 915.3157         |
|         | <b>745.3549</b>  | 373.1811         | 249.1232         | 6  | M      | 23 | 2628.9056        | <b>1314.9564</b> | 876.9734         |
|         | <b>860.3818</b>  | 430.6946         | 287.4655         | 7  | D      | 22 | 2497.8651        | <b>1249.4362</b> | 833.2932         |
|         | <b>931.4189</b>  | 466.2131         | 311.1445         | 8  | A      | 21 | 2382.8381        | <b>1191.9227</b> | 794.9509         |
|         | <b>1046.4459</b> | 523.7266         | 349.4868         | 9  | D      | 20 | 2311.8010        | <b>1156.4042</b> | 771.2719         |
|         | <b>1161.4728</b> | 581.2401         | 387.8291         | 10 | D      | 19 | 2196.7741        | 1098.8907        | 732.9295         |
|         | 1328.4712        | 664.7392         | 443.4953         | 11 | S[167] | 18 | 2081.7471        | <b>1041.3772</b> | 694.5872         |
|         | 1495.4696        | 748.2384         | 499.1614         | 12 | S[167] | 17 | 1914.7488        | 957.8780         | 638.9211         |
|         | 1610.4965        | 805.7519         | 537.5037         | 13 | D      | 16 | 1747.7504        | <b>874.3788</b>  | 583.2550         |
|         | 1725.5234        | 863.2654         | 575.8460         | 14 | D      | 15 | 1632.7235        | 816.8654         | 544.9127         |
|         | 1854.5660        | <b>927.7867</b>  | 618.8602         | 15 | E      | 14 | 1517.6965        | 759.3519         | 506.5704         |
|         | 1969.5930        | <b>985.3001</b>  | 657.2025         | 16 | D      | 13 | <b>1388.6539</b> | 694.8306         | 463.5562         |
|         | 2026.6144        | <b>1013.8109</b> | 676.2097         | 17 | G      | 12 | <b>1273.6270</b> | 637.3171         | 425.2139         |
|         | 2141.6414        | 1071.3243        | 714.5520         | 18 | D      | 11 | <b>1216.6055</b> | 608.8064         | 406.2067         |
|         | 2254.7254        | <b>1127.8664</b> | 752.2467         | 19 | L      | 10 | <b>1101.5786</b> | 551.2929         | 367.8644         |
|         | 2368.7684        | <b>1184.8878</b> | 790.2610         | 20 | N      | 9  | <b>988.4946</b>  | 494.7509         | 330.1697         |
|         | 2497.8109        | <b>1249.4091</b> | 833.2752         | 21 | E      | 8  | <b>874.4516</b>  | 437.7295         | 292.1554         |
|         | 2610.8950        | <b>1305.9511</b> | 870.9699         | 22 | L      | 7  | <b>745.4090</b>  | 373.2082         | 249.1412         |
|         | 2739.9376        | <b>1370.4724</b> | <b>913.9841</b>  | 23 | E      | 6  | <b>632.3250</b>  | 316.6661         | 211.4465         |
|         | 2826.9696        | 1413.9885        | 942.9947         | 24 | S      | 5  | <b>503.2824</b>  | 252.1448         | 168.4323         |
|         | 2928.0173        | 1464.5123        | 976.6773         | 25 | T      | 4  | <b>416.2503</b>  | 208.6288         | 139.4216         |
|         | 3025.0701        | 1513.0387        | 1009.0282        | 26 | P      | 3  | <b>315.2027</b>  | 158.1050         | 105.7391         |
|         | 3096.1072        | 1548.5572        | <b>1032.7072</b> | 27 | A      | 2  | 218.1499         | 109.5786         | 73.3882          |
|         |                  |                  |                  | 28 | K      | 1  | 147.1128         | 74.0600          | 49.7091          |

# Annotated spectra from Saleem et. al. 2009

R.EQS<sub>167</sub>VST<sub>181</sub>EPLDTLPLR.K/2

0.6872

1e+04

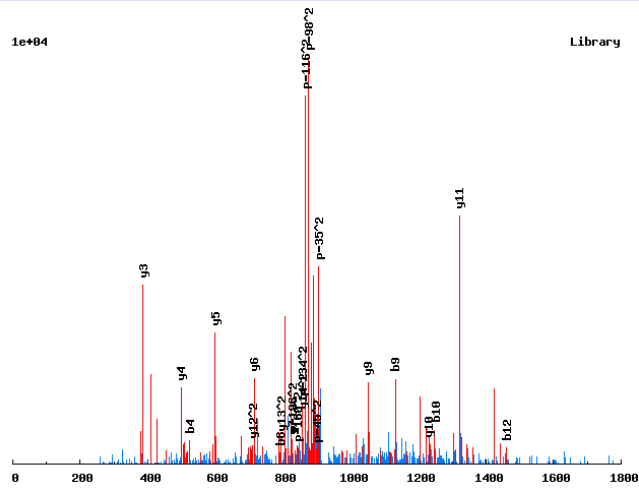

| Library | b <sup>1+</sup> | b <sup>2+</sup> | #  | AA     | #  | y <sup>1+</sup> | y <sup>2+</sup> |
|---------|-----------------|-----------------|----|--------|----|-----------------|-----------------|
|         | 130.0499        | 65.5286         | 1  | E      | 15 |                 |                 |
|         | 258.1085        | 129.5579        | 2  | Q      | 14 | 1715.7653       | 858.3863        |
|         | 425.1068        | 213.0570        | 3  | S[167] | 13 | 1587.7067       | 794.3570        |
|         | 524.1752        | 262.5913        | 4  | V      | 12 | 1420.7083       | 710.8578        |
|         | 611.2073        | 306.1073        | 5  | S      | 11 | 1321.6399       | 661.3236        |
|         | 792.2213        | 396.6143        | 6  | T[181] | 10 | 1234.6079       | 617.8076        |
|         | 921.2639        | 461.1356        | 7  | E      | 9  | 1053.5939       | 527.3006        |
|         | 1018.3166       | 509.6619        | 8  | P      | 8  | 924.5513        | 462.7793        |
|         | 1131.4007       | 566.2040        | 9  | L      | 7  | 827.4985        | 414.2529        |
|         | 1246.4276       | 623.7174        | 10 | D      | 6  | 714.4145        | 357.7109        |
|         | 1347.4753       | 674.2413        | 11 | T      | 5  | 599.3875        | 300.1974        |
|         | 1460.5594       | 730.7833        | 12 | L      | 4  | 498.3398        | 249.6736        |
|         | 1557.6121       | 779.3097        | 13 | P      | 3  | 385.2558        | 193.1315        |
|         | 1670.6962       | 835.8517        | 14 | L      | 2  | 288.2030        | 144.6051        |
|         |                 |                 | 15 | R      | 1  | 175.1190        | 88.0631         |



# Annotated spectra from Saleem et. al. 2009

REREEDRLS<sub>167</sub>EDDLMLMENAGVER.T/3

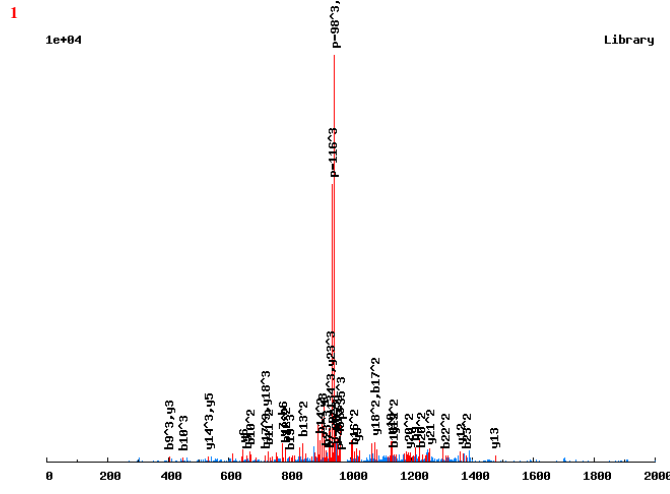

| Library | b <sup>1+</sup> | b <sup>2+</sup> | b <sup>3+</sup> | #  | AA     | #  | y <sup>1+</sup> | y <sup>2+</sup> | y <sup>3+</sup> |
|---------|-----------------|-----------------|-----------------|----|--------|----|-----------------|-----------------|-----------------|
|         | 130.0499        | 65.5286         | 44.0215         | 1  | E      | 24 |                 |                 |                 |
|         | 286.1510        | 143.5791        | 96.0552         | 2  | R      | 23 | 2799.2138       | 1400.1106       | 933.7428        |
|         | 415.1936        | 208.1004        | 139.0694        | 3  | E      | 22 | 2643.1127       | 1322.0600       | 881.7091        |
|         | 544.2362        | 272.6217        | 182.0836        | 4  | E      | 21 | 2514.0701       | 1257.5387       | 838.6949        |
|         | 659.2631        | 330.1352        | 220.4259        | 5  | D      | 20 | 2385.0275       | 1193.0174       | 795.6807        |
|         | 774.2900        | 387.6487        | 258.7682        | 6  | D      | 19 | 2270.0006       | 1135.5039       | 757.3384        |
|         | 930.3911        | 465.6992        | 310.8019        | 7  | R      | 18 | 2154.9737       | 1077.9905       | 718.9961        |
|         | 1043.4752       | 522.2412        | 348.4966        | 8  | L      | 17 | 1998.8725       | 999.9399        | 666.9624        |
|         | 1210.4736       | 605.7404        | 404.1627        | 9  | S[167] | 16 | 1885.7885       | 943.3979        | 629.2677        |
|         | 1339.5162       | 670.2617        | 447.1769        | 10 | E      | 15 | 1718.7901       | 859.8987        | 573.6016        |
|         | 1454.5431       | 727.7752        | 485.5192        | 11 | D      | 14 | 1589.7475       | 795.3774        | 530.5874        |
|         | 1569.5700       | 785.2887        | 523.8615        | 12 | D      | 13 | 1474.7206       | 737.8639        | 492.2451        |
|         | 1682.6541       | 841.8307        | 561.5562        | 13 | L      | 12 | 1359.6937       | 680.3505        | 453.9027        |
|         | 1797.6810       | 899.3442        | 599.8985        | 14 | D      | 11 | 1246.6096       | 623.8084        | 416.2081        |
|         | 1910.7651       | 955.8862        | 637.5932        | 15 | L      | 10 | 1131.5827       | 566.2950        | 377.8657        |
|         | 2023.8492       | 1012.4282       | 675.2879        | 16 | L      | 9  | 1018.4986       | 509.7529        | 340.1711        |
|         | 2154.8897       | 1077.9485       | 718.9681        | 17 | M      | 8  | 905.4145        | 453.2109        | 302.4764        |
|         | 2283.9322       | 1142.4698       | 761.9823        | 18 | E      | 7  | 774.3740        | 387.6907        | 258.7962        |
|         | 2397.9752       | 1199.4912       | 799.9966        | 19 | N      | 6  | 645.3315        | 323.1694        | 215.7820        |
|         | 2469.0123       | 1235.0098       | 823.6756        | 20 | A      | 5  | 531.2885        | 266.1479        | 177.7677        |
|         | 2526.0337       | 1263.5205       | 842.6828        | 21 | G      | 4  | 460.2514        | 230.6293        | 154.0887        |
|         | 2625.1022       | 1313.0547       | 875.7056        | 22 | V      | 3  | 403.2299        | 202.1186        | 135.0815        |
|         | 2754.1447       | 1377.5760       | 918.7198        | 23 | E      | 2  | 304.1615        | 152.5844        | 102.0587        |
|         |                 |                 |                 | 24 | R      | 1  | 175.1190        | 88.0631         | 59.0445         |

# Annotated spectra from Saleem et. al. 2009

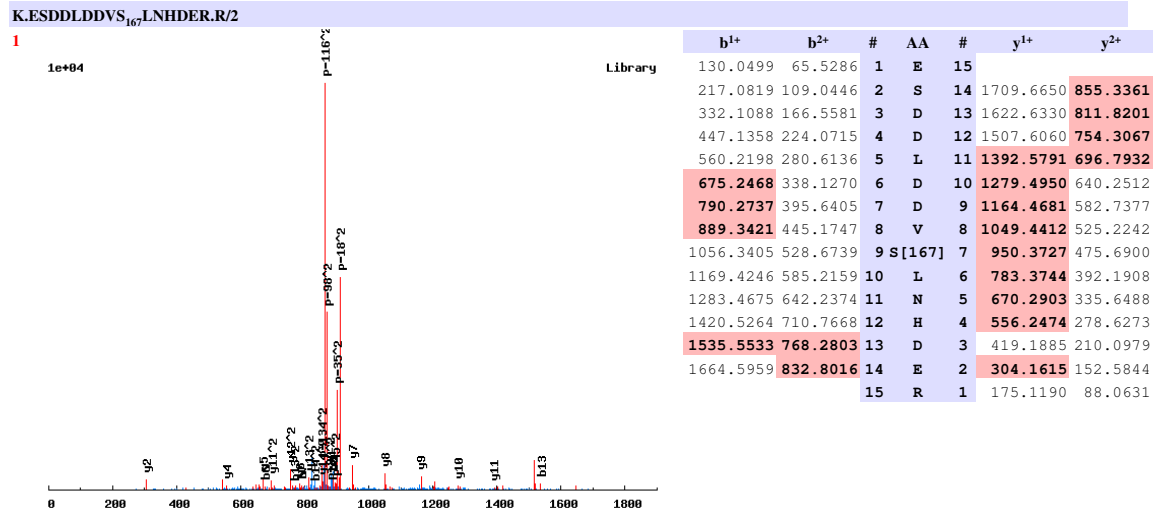

# Annotated spectra from Saleem et. al. 2009

K.ESGNNAST<sub>181</sub>PS<sub>167</sub>SSPEPVANPPK<sub>136</sub>.M/2

0.998

1e+04

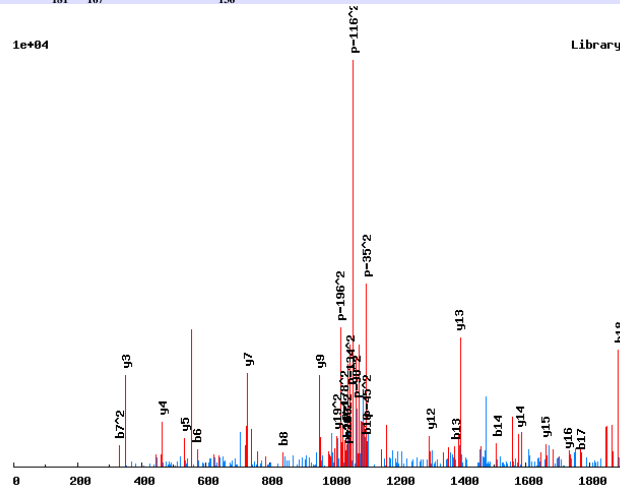

| Library | b <sup>1+</sup> | b <sup>2+</sup> | #  | AA     | #  | y <sup>1+</sup> | y <sup>2+</sup> |
|---------|-----------------|-----------------|----|--------|----|-----------------|-----------------|
|         | 130.0499        | 65.5286         | 1  | E      | 21 |                 |                 |
|         | 217.0819        | 109.0446        | 2  | S      | 20 | 2105.8668       | 1053.4370       |
|         | 274.1034        | 137.5553        | 3  | G      | 19 | 2018.8347       | 1009.9210       |
|         | 388.1463        | 194.5768        | 4  | N      | 18 | 1961.8133       | 981.4103        |
|         | 502.1892        | 251.5982        | 5  | N      | 17 | 1847.7703       | 924.3888        |
|         | 573.2263        | 287.1168        | 6  | A      | 16 | 1733.7274       | 867.3673        |
|         | 660.2584        | 330.6328        | 7  | S      | 15 | 1662.6903       | 831.8488        |
|         | 841.2724        | 421.1398        | 8  | T[181] | 14 | 1575.6583       | 788.3328        |
|         | 938.3251        | 469.6662        | 9  | P      | 13 | 1394.6443       | 697.8258        |
|         | 1105.3235       | 553.1654        | 10 | S[167] | 12 | 1297.5915       | 649.2994        |
|         | 1192.3555       | 596.6814        | 11 | S      | 11 | 1130.5931       | 565.8002        |
|         | 1279.3876       | 640.1974        | 12 | S      | 10 | 1043.5611       | 522.2842        |
|         | 1376.4403       | 688.7238        | 13 | P      | 9  | 956.5291        | 478.7682        |
|         | 1505.4829       | 753.2451        | 14 | E      | 8  | 859.4763        | 430.2418        |
|         | 1602.5357       | 801.7715        | 15 | P      | 7  | 730.4337        | 365.7205        |
|         | 1701.6041       | 851.3057        | 16 | V      | 6  | 633.3810        | 317.1941        |
|         | 1772.6412       | 886.8242        | 17 | A      | 5  | 534.3126        | 267.6599        |
|         | 1886.6841       | 943.8457        | 18 | N      | 4  | 463.2754        | 232.1414        |
|         | 1983.7369       | 992.3721        | 19 | P      | 3  | 349.2325        | 175.1199        |
|         | 2080.7896       | 1040.8985       | 20 | P      | 2  | 252.1798        | 126.5935        |
|         |                 |                 | 21 | K[136] | 1  | 155.1270        | 78.0671         |

# Annotated spectra from Saleem et. al. 2009

R.ESHS<sub>167</sub>NPSFT<sub>181</sub>PK.S/2

0.9325

1e+04

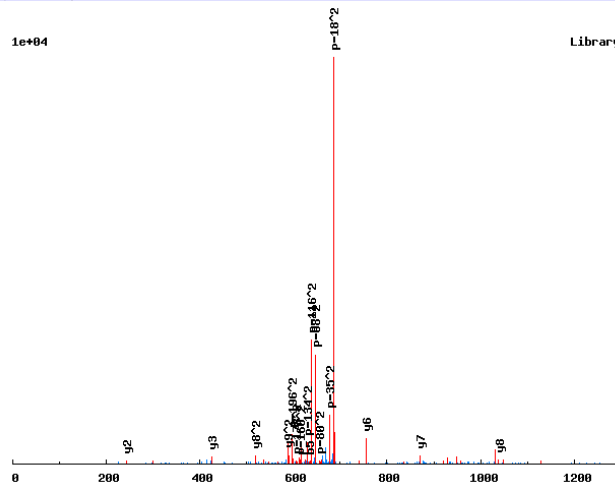

| Library | b <sup>1+</sup> | b <sup>2+</sup> | #  | AA     | #  | y <sup>1+</sup> | y <sup>2+</sup> |
|---------|-----------------|-----------------|----|--------|----|-----------------|-----------------|
|         | 130.0499        | 65.5286         | 1  | E      | 11 |                 |                 |
|         | 217.0819        | 109.0446        | 2  | S      | 10 | 1261.4650       | 631.2361        |
|         | 354.1408        | 177.5740        | 3  | H      | 9  | 1174.4330       | 587.7201        |
|         | 521.1392        | 261.0732        | 4  | S[167] | 8  | 1037.3741       | 519.1907        |
|         | 635.1821        | 318.0947        | 5  | N      | 7  | 870.3757        | 435.6915        |
|         | 732.2349        | 366.6211        | 6  | P      | 6  | 756.3328        | 378.6700        |
|         | 819.2669        | 410.1371        | 7  | S      | 5  | 659.2800        | 330.1436        |
|         | 966.3353        | 483.6713        | 8  | F      | 4  | 572.2480        | 286.6276        |
|         | 1147.3493       | 574.1783        | 9  | T[181] | 3  | 425.1796        | 213.0934        |
|         | 1244.4021       | 622.7047        | 10 | P      | 2  | 244.1656        | 122.5864        |
|         |                 |                 | 11 | K      | 1  | 147.1128        | 74.0600         |

# Annotated spectra from Saleem et. al. 2009

K.ESISGT<sub>181</sub>PT<sub>181</sub>PTSIPHEEQ<sub>R</sub>.Q/3

0.9917

1e+04

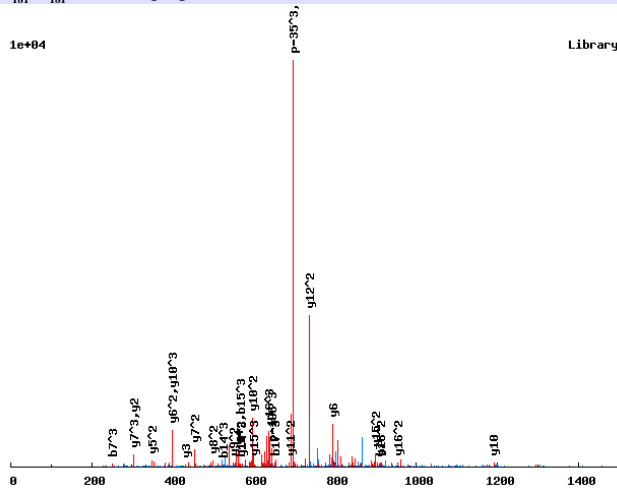

| Library | b <sup>1+</sup> | b <sup>2+</sup> | b <sup>3+</sup> | #  | AA     | #  | y <sup>1+</sup> | y <sup>2+</sup> | y <sup>3+</sup> |
|---------|-----------------|-----------------|-----------------|----|--------|----|-----------------|-----------------|-----------------|
|         | 130.0499        | 65.5286         | 44.0215         | 1  | E      | 18 |                 |                 |                 |
|         | 217.0819        | 109.0446        | 73.0322         | 2  | S      | 17 | 1996.8413       | 998.9243        | 666.2853        |
|         | 330.1660        | 165.5866        | 110.7268        | 3  | I      | 16 | 1909.8092       | 955.4083        | 637.2746        |
|         | 417.1980        | 209.1026        | 139.7375        | 4  | S      | 15 | 1796.7252       | 898.8662        | 599.5799        |
|         | 474.2194        | 237.6134        | 158.7447        | 5  | G      | 14 | 1709.6932       | 855.3502        | 570.5692        |
|         | 655.2335        | 328.1204        | 219.0827        | 6  | T[181] | 13 | 1652.6717       | 826.8395        | 551.5621        |
|         | 752.2862        | 376.6468        | 251.4336        | 7  | P      | 12 | 1471.6577       | 736.3325        | 491.2241        |
|         | 933.3002        | 467.1538        | 311.7716        | 8  | T[181] | 11 | 1374.6049       | 687.8061        | 458.8732        |
|         | 1030.3530       | 515.6801        | 344.1225        | 9  | P      | 10 | 1193.5909       | 597.2991        | 398.5352        |
|         | 1131.4007       | 566.2040        | 377.8051        | 10 | T      | 9  | 1096.5382       | 548.7727        | 366.1842        |
|         | 1218.4327       | 609.7200        | 406.8158        | 11 | S      | 8  | 995.4905        | 498.2489        | 332.5017        |
|         | 1331.5168       | 666.2620        | 444.5104        | 12 | I      | 7  | 908.4584        | 454.7329        | 303.4910        |
|         | 1428.5695       | 714.7884        | 476.8614        | 13 | P      | 6  | 795.3744        | 398.1908        | 265.7963        |
|         | 1565.6284       | 783.3179        | 522.5477        | 14 | H      | 5  | 698.3216        | 349.6645        | 233.4454        |
|         | 1694.6710       | 847.8392        | 565.5619        | 15 | E      | 4  | 561.2627        | 281.1350        | 187.7591        |
|         | 1823.7136       | 912.3604        | 608.5761        | 16 | E      | 3  | 432.2201        | 216.6137        | 144.7449        |
|         | 1951.7722       | 976.3897        | 651.2623        | 17 | Q      | 2  | 303.1775        | 152.0924        | 101.7307        |
|         |                 |                 |                 | 18 | R      | 1  | 175.1190        | 88.0631         | 59.0445         |



# Annotated spectra from Saleem et. al. 2009

K.ES<sub>167</sub>-LEM<sub>147</sub>-VPK.D/2

0.8941

1e+04

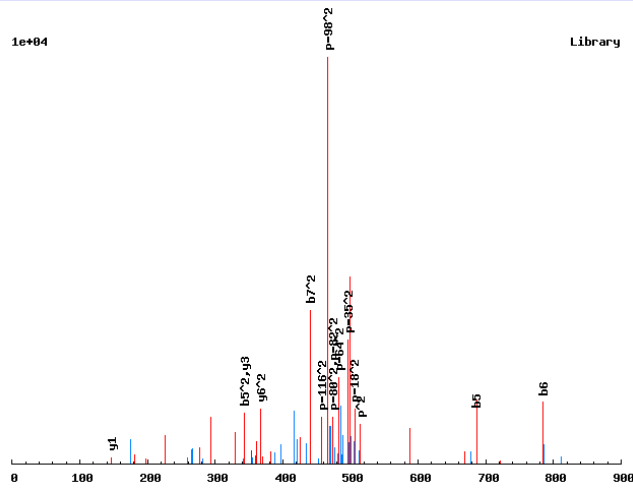

| Library | b <sup>1+</sup> | b <sup>2+</sup> | # | AA     | # | y <sup>1+</sup> | y <sup>2+</sup> |
|---------|-----------------|-----------------|---|--------|---|-----------------|-----------------|
|         | 130.0499        | 65.5286         | 1 | E      | 8 |                 |                 |
|         | 297.0482        | 149.0278        | 2 | S[167] | 7 | 899.3944        | 450.2008        |
|         | 410.1323        | 205.5698        | 3 | L      | 6 | 732.3960        | 366.7017        |
|         | 539.1749        | 270.0911        | 4 | E      | 5 | 619.3120        | 310.1596        |
|         | 686.2103        | 343.6088        | 5 | M[147] | 4 | 490.2694        | 245.6383        |
|         | 785.2787        | 393.1430        | 6 | V      | 3 | 343.2340        | 172.1206        |
|         | 882.3315        | 441.6694        | 7 | P      | 2 | 244.1656        | 122.5864        |
|         |                 |                 | 8 | K      | 1 | 147.1128        | 74.0600         |

# Annotated spectra from Saleem et. al. 2009

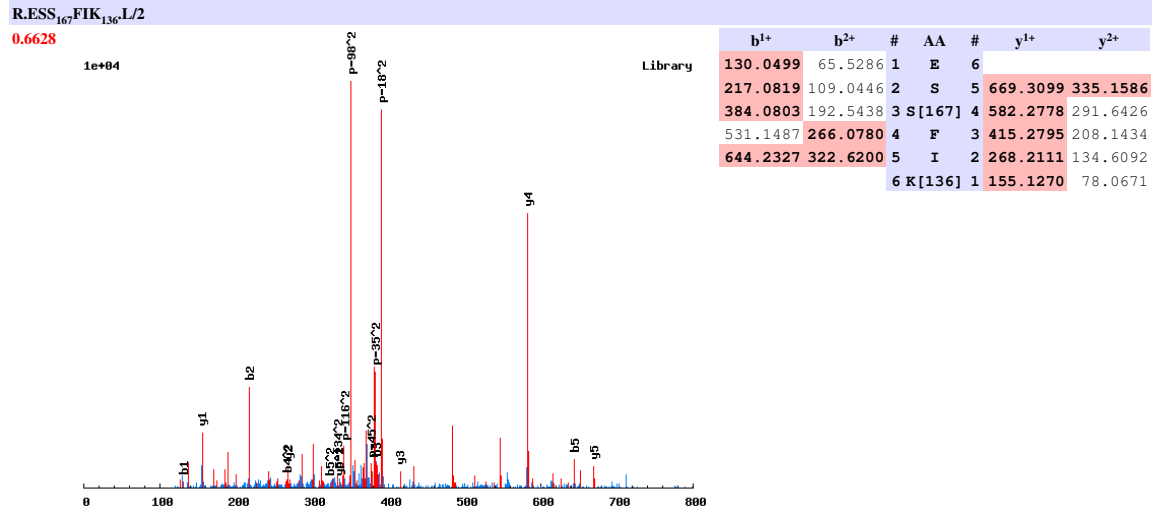



# Annotated spectra from Saleem et. al. 2009

R.ESS<sub>167</sub>IGEHAPGAER<sub>166</sub>.R/3

0.6002

1e+04

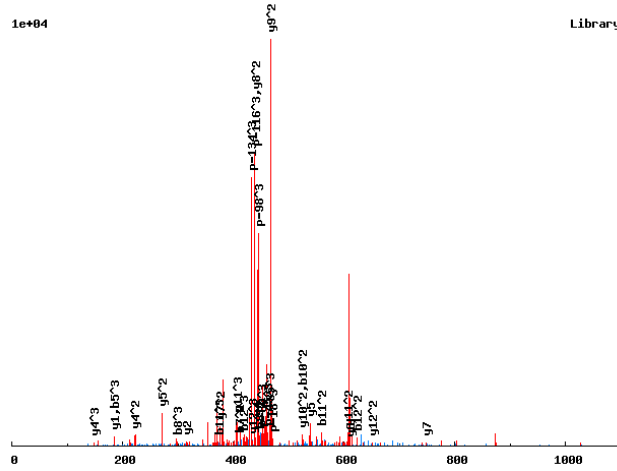

| Library | b <sup>1+</sup> | b <sup>2+</sup> | b <sup>3+</sup> | #  | AA     | #  | y <sup>1+</sup> | y <sup>2+</sup> | y <sup>3+</sup> |
|---------|-----------------|-----------------|-----------------|----|--------|----|-----------------|-----------------|-----------------|
|         | 130.0499        | 65.5286         | 44.0215         | 1  | E      | 13 |                 |                 |                 |
|         | 217.0819        | 109.0446        | 73.0322         | 2  | S      | 12 | 1300.5557       | 650.7815        | 434.1901        |
|         | 384.0803        | 192.5438        | 128.6983        | 3  | S[167] | 11 | 1213.5236       | 607.2655        | 405.1794        |
|         | 497.1643        | 249.0858        | 166.3930        | 4  | I      | 10 | 1046.5253       | 523.7663        | 349.5133        |
|         | 554.1858        | 277.5965        | 185.4001        | 5  | G      | 9  | 933.4412        | 467.2242        | 311.8186        |
|         | 683.2284        | 342.1178        | 228.4143        | 6  | E      | 8  | 876.4197        | 438.7135        | 292.8114        |
|         | 820.2873        | 410.6473        | 274.1006        | 7  | H      | 7  | 747.3772        | 374.1922        | 249.7972        |
|         | 891.3244        | 446.1658        | 297.7797        | 8  | A      | 6  | 610.3182        | 305.6628        | 204.1109        |
|         | 988.3772        | 494.6922        | 330.1306        | 9  | P      | 5  | 539.2811        | 270.1442        | 180.4319        |
|         | 1045.3986       | 523.2029        | 349.1377        | 10 | G      | 4  | 442.2284        | 221.6178        | 148.0810        |
|         | 1116.4357       | 558.7215        | 372.8168        | 11 | A      | 3  | 385.2069        | 193.1071        | 129.0738        |
|         | 1245.4783       | 623.2428        | 415.8310        | 12 | E      | 2  | 314.1698        | 157.5885        | 105.3948        |
|         |                 |                 |                 | 13 | R[166] | 1  | 185.1272        | 93.0672         | 62.3806         |

# Annotated spectra from Saleem et. al. 2009

R.ESS<sub>167</sub>IST<sub>181</sub>VAR<sub>166</sub>H/2

0.859

1e+04

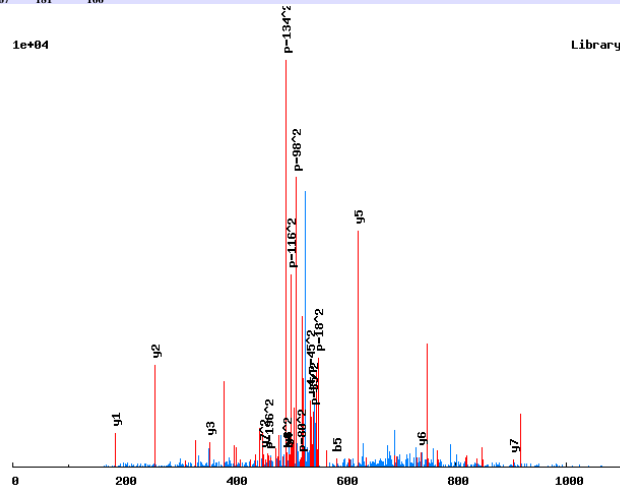

| Library | b <sup>1+</sup> | b <sup>2+</sup> | # | AA     | # | y <sup>1+</sup> | y <sup>2+</sup> |
|---------|-----------------|-----------------|---|--------|---|-----------------|-----------------|
|         | 130.0499        | 65.5286         | 1 | E      | 9 |                 |                 |
|         | 217.0819        | 109.0446        | 2 | S      | 8 | 990.3932        | 495.7003        |
|         | 384.0803        | 192.5438        | 3 | S[167] | 7 | 903.3612        | 452.1842        |
|         | 497.1643        | 249.0858        | 4 | I      | 6 | 736.3628        | 368.6851        |
|         | 584.1964        | 292.6018        | 5 | S      | 5 | 623.2788        | 312.1430        |
|         | 765.2104        | 383.1088        | 6 | T[181] | 4 | 536.2468        | 268.6270        |
|         | 864.2788        | 432.6430        | 7 | V      | 3 | 355.2327        | 178.1200        |
|         | 935.3159        | 468.1616        | 8 | A      | 2 | 256.1643        | 128.5858        |
|         |                 |                 | 9 | R[166] | 1 | 185.1272        | 93.0672         |

# Annotated spectra from Saleem et. al. 2009

R.ESS<sub>167</sub>R<sub>166</sub>S<sub>167</sub>PIALYEAR<sub>166</sub>Q/3

0.6144

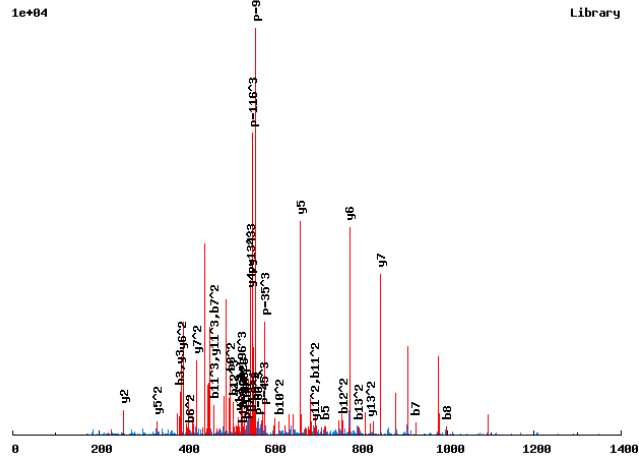

| Library | b <sup>1+</sup> | b <sup>2+</sup> | b <sup>3+</sup> | #  | AA     | #  | y <sup>1+</sup> | y <sup>2+</sup> | y <sup>3+</sup> |
|---------|-----------------|-----------------|-----------------|----|--------|----|-----------------|-----------------|-----------------|
|         | 130.0499        | 65.5286         | 44.0215         | 1  | E      | 14 |                 |                 |                 |
|         | 217.0819        | 109.0446        | 73.0322         | 2  | S      | 13 | 1643.7093       | 822.3583        | 548.5746        |
|         | 384.0803        | 192.5438        | 128.6983        | 3  | S[167] | 12 | 1556.6773       | 778.8423        | 519.5639        |
|         | 550.1896        | 275.5985        | 184.0681        | 4  | R[166] | 11 | 1389.6789       | 695.3431        | 463.8978        |
|         | 717.1880        | 359.0976        | 239.7342        | 5  | S[167] | 10 | 1223.5695       | 612.2884        | 408.5280        |
|         | 814.2408        | 407.6240        | 272.0851        | 6  | P      | 9  | 1056.5712       | 528.7892        | 352.8619        |
|         | 927.3248        | 464.1661        | 309.7798        | 7  | I      | 8  | 959.5184        | 480.2628        | 320.5110        |
|         | 998.3619        | 499.6846        | 333.4588        | 8  | A      | 7  | 846.4343        | 423.7208        | 282.8163        |
|         | 1111.4460       | 556.2266        | 371.1535        | 9  | L      | 6  | 775.3972        | 388.2023        | 259.1373        |
|         | 1225.4889       | 613.2481        | 409.1678        | 10 | N      | 5  | 662.3132        | 331.6602        | 221.4426        |
|         | 1388.5523       | 694.7798        | 463.5223        | 11 | Y      | 4  | 548.2702        | 274.6388        | 183.4283        |
|         | 1517.5948       | 759.3011        | 506.5365        | 12 | E      | 3  | 385.2069        | 193.1071        | 129.0738        |
|         | 1588.6320       | 794.8196        | 530.2155        | 13 | A      | 2  | 256.1643        | 128.5858        | 86.0596         |
|         |                 |                 |                 | 14 | R[166] | 1  | 185.1272        | 93.0672         | 62.3806         |

Annotated spectra from Saleem et. al. 2009

K.ETERSPS<sub>167</sub>S<sub>167</sub>S<sub>167</sub>PIHNATKPEEAVK.T/3

0.7542

1e+04

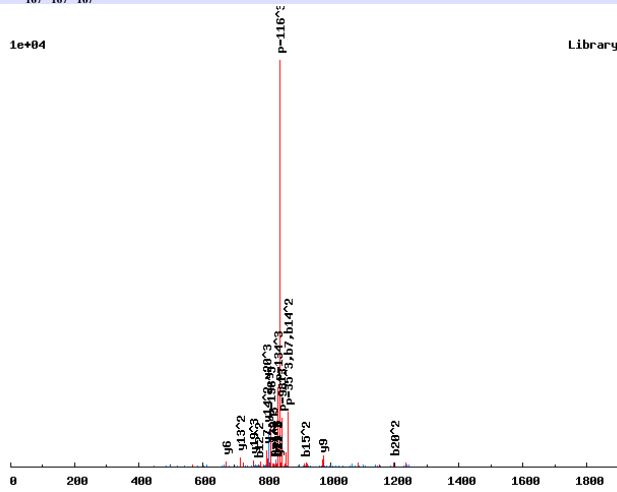

| Library | b <sup>1+</sup> | b <sup>2+</sup> | b <sup>3+</sup> | #  | AA     | #  | y <sup>1+</sup> | y <sup>2+</sup> | y <sup>3+</sup> |
|---------|-----------------|-----------------|-----------------|----|--------|----|-----------------|-----------------|-----------------|
|         | 130.0499        | 65.5286         | 44.0215         | 1  | E      | 22 |                 |                 |                 |
|         | 231.0975        | 116.0524        | 77.7040         | 2  | T      | 21 | 2505.0459       | 1253.0266       | 835.6868        |
|         | 360.1401        | 180.5737        | 120.7182        | 3  | E      | 20 | 2403.9982       | 1202.5028       | 802.0043        |
|         | 516.2413        | 258.6243        | 172.7519        | 4  | R      | 19 | 2274.9557       | 1137.9815       | 758.9901        |
|         | 603.2733        | 302.1403        | 201.7626        | 5  | S      | 18 | 2118.8545       | 1059.9309       | 706.9564        |
|         | 700.3260        | 350.6667        | 234.1135        | 6  | P      | 17 | 2031.8225       | 1016.4149       | 677.9457        |
|         | 867.3244        | 434.1658        | 289.7797        | 7  | S[167] | 16 | 1934.7698       | 967.8885        | 645.5948        |
|         | 1034.3228       | 517.6650        | 345.4458        | 8  | S[167] | 15 | 1767.7714       | 884.3893        | 589.9287        |
|         | 1201.3211       | 601.1642        | 401.1119        | 9  | S[167] | 14 | 1600.7730       | 800.8902        | 534.2625        |
|         | 1298.3739       | 649.6906        | 433.4628        | 10 | P      | 13 | 1433.7747       | 717.3910        | 478.5964        |
|         | 1411.4579       | 706.2326        | 471.1575        | 11 | I      | 12 | 1336.7219       | 668.8646        | 446.2455        |
|         | 1548.5169       | 774.7621        | 516.8438        | 12 | H      | 11 | 1223.6378       | 612.3226        | 408.5508        |
|         | 1662.5598       | 831.7835        | 554.8581        | 13 | N      | 10 | 1086.5789       | 543.7931        | 362.8645        |
|         | 1733.5969       | 867.3021        | 578.5372        | 14 | A      | 9  | 972.5360        | 486.7716        | 324.8502        |
|         | 1834.6446       | 917.8259        | 612.2197        | 15 | T      | 8  | 901.4989        | 451.2531        | 301.1712        |
|         | 1962.7395       | 981.8734        | 654.9180        | 16 | K      | 7  | 800.4512        | 400.7293        | 267.4886        |
|         | 2059.7923       | 1030.3998       | 687.2690        | 17 | P      | 6  | 672.3563        | 336.6818        | 224.7903        |
|         | 2188.8349       | 1094.9211       | 730.2831        | 18 | E      | 5  | 575.3035        | 288.1554        | 192.4394        |
|         | 2317.8775       | 1159.4424       | 773.2973        | 19 | E      | 4  | 446.2609        | 223.6341        | 149.4252        |
|         | 2388.9146       | 1194.9609       | 796.9764        | 20 | A      | 3  | 317.2183        | 159.1128        | 106.4110        |
|         | 2487.9830       | 1244.4951       | 829.9992        | 21 | V      | 2  | 246.1812        | 123.5942        | 82.7319         |
|         |                 |                 |                 | 22 | K      | 1  | 147.1128        | 74.0600         | 49.7091         |

# Annotated spectra from Saleem et. al. 2009

K.ETPLHSSSS<sub>167</sub>TS<sub>167</sub>LSSLFRPTK.L/3

0.9873

1e+04

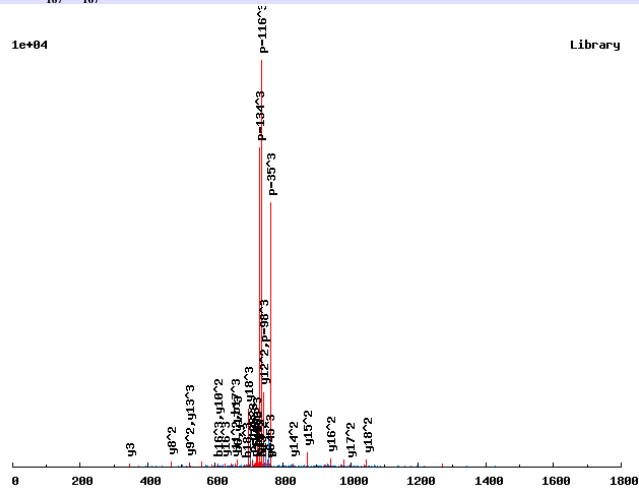

| Library | b <sup>1+</sup> | b <sup>2+</sup> | b <sup>3+</sup> | #  | AA     | #  | y <sup>1+</sup> | y <sup>2+</sup> | y <sup>3+</sup> |
|---------|-----------------|-----------------|-----------------|----|--------|----|-----------------|-----------------|-----------------|
|         | 130.0499        | 65.5286         | 44.0215         | 1  | E      | 20 |                 |                 |                 |
|         | 231.0975        | 116.0524        | 77.7040         | 2  | T      | 19 | 2192.9988       | 1097.0031       | 731.6711        |
|         | 328.1503        | 164.5788        | 110.0550        | 3  | P      | 18 | 2091.9512       | 1046.4792       | 697.9886        |
|         | 441.2344        | 221.1208        | 147.7496        | 4  | L      | 17 | 1994.8984       | 997.9528        | 665.6377        |
|         | 578.2933        | 289.6503        | 193.4359        | 5  | H      | 16 | 1881.8143       | 941.4108        | 627.9430        |
|         | 665.3253        | 333.1663        | 222.4466        | 6  | S      | 15 | 1744.7554       | 872.8814        | 582.2567        |
|         | 752.3573        | 376.6823        | 251.4573        | 7  | S      | 14 | 1657.7234       | 829.3653        | 553.2460        |
|         | 839.3894        | 420.1983        | 280.4680        | 8  | S      | 13 | 1570.6914       | 785.8493        | 524.2353        |
|         | 1006.3877       | 503.6975        | 336.1341        | 9  | S[167] | 12 | 1483.6593       | 742.3333        | 495.2246        |
|         | 1107.4354       | 554.2213        | 369.8167        | 10 | T      | 11 | 1316.6610       | 658.8341        | 439.5585        |
|         | 1274.4338       | 637.7205        | 425.4828        | 11 | S[167] | 10 | 1215.6133       | 608.3103        | 405.8760        |
|         | 1387.5178       | 694.2626        | 463.1775        | 12 | L      | 9  | 1048.6149       | 524.8111        | 350.2098        |
|         | 1474.5499       | 737.7786        | 492.1881        | 13 | S      | 8  | 935.5309        | 468.2691        | 312.5151        |
|         | 1561.5819       | 781.2946        | 521.1988        | 14 | S      | 7  | 848.4989        | 424.7531        | 283.5045        |
|         | 1674.6660       | 837.8366        | 558.8935        | 15 | L      | 6  | 761.4668        | 381.2371        | 254.4938        |
|         | 1821.7344       | 911.3708        | 607.9163        | 16 | F      | 5  | 648.3828        | 324.6950        | 216.7991        |
|         | 1977.8355       | 989.4214        | 659.9500        | 17 | R      | 4  | 501.3143        | 251.1608        | 167.7763        |
|         | 2074.8882       | 1037.9478       | 692.3009        | 18 | P      | 3  | 345.2132        | 173.1103        | 115.7426        |
|         | 2175.9359       | 1088.4716       | 725.9835        | 19 | T      | 2  | 248.1605        | 124.5839        | 83.3917         |
|         |                 |                 |                 | 20 | K      | 1  | 147.1128        | 74.0600         | 49.7091         |

Annotated spectra from Saleem et. al. 2009

RETQEDDTNS<sub>167</sub>IDS<sub>167</sub>SDDLDFVK.I/2

0.9999

1e+04

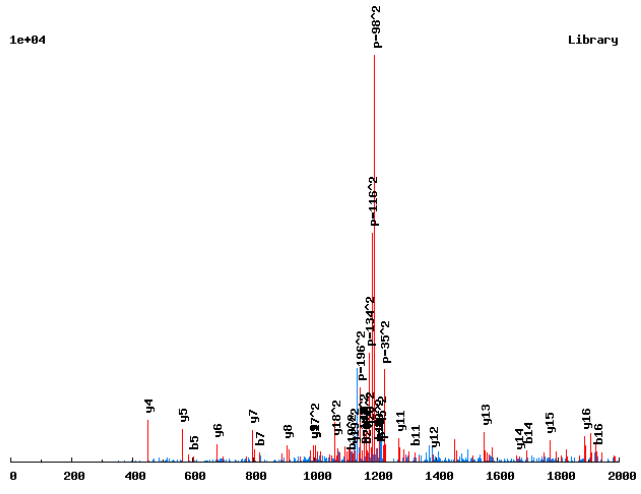

| Library | b <sup>1+</sup> | b <sup>2+</sup> | #  | AA     | #  | y <sup>1+</sup> | y <sup>2+</sup> |
|---------|-----------------|-----------------|----|--------|----|-----------------|-----------------|
|         | 130.0499        | 65.5286         | 1  | E      | 21 |                 |                 |
|         | 231.0975        | 116.0524        | 2  | T      | 20 | 2360.8691       | 1180.9382       |
|         | 359.1561        | 180.0817        | 3  | Q      | 19 | 2259.8214       | 1130.4143       |
|         | 488.1987        | 244.6030        | 4  | E      | 18 | 2131.7628       | 1066.3850       |
|         | 603.2257        | 302.1165        | 5  | D      | 17 | 2002.7202       | 1001.8637       |
|         | 718.2526        | 359.6299        | 6  | D      | 16 | 1887.6933       | 944.3503        |
|         | 819.3003        | 410.1538        | 7  | T      | 15 | 1772.6663       | 886.8368        |
|         | 933.3432        | 467.1752        | 8  | N      | 14 | 1671.6186       | 836.3130        |
|         | 1100.3416       | 550.6744        | 9  | S[167] | 13 | 1557.5757       | 779.2915        |
|         | 1213.4256       | 607.2165        | 10 | I      | 12 | 1390.5774       | 695.7923        |
|         | 1328.4526       | 664.7299        | 11 | D      | 11 | 1277.4933       | 639.2503        |
|         | 1495.4509       | 748.2291        | 12 | S[167] | 10 | 1162.4664       | 581.7368        |
|         | 1582.4830       | 791.7451        | 13 | S      | 9  | 995.4680        | 498.2376        |
|         | 1697.5099       | 849.2586        | 14 | D      | 8  | 908.4360        | 454.7216        |
|         | 1812.5368       | 906.7721        | 15 | D      | 7  | 793.4090        | 397.2082        |
|         | 1925.6209       | 963.3141        | 16 | L      | 6  | 678.3821        | 339.6947        |
|         | 2040.6478       | 1020.8276       | 17 | D      | 5  | 565.2980        | 283.1527        |
|         | 2097.6693       | 1049.3383       | 18 | G      | 4  | 450.2711        | 225.6392        |
|         | 2244.7377       | 1122.8725       | 19 | F      | 3  | 393.2496        | 197.1284        |
|         | 2343.8061       | 1172.4067       | 20 | V      | 2  | 246.1812        | 123.5942        |
|         |                 |                 | 21 | K      | 1  | 147.1128        | 74.0600         |

# Annotated spectra from Saleem et. al. 2009

R.ETYDSNES<sub>167</sub>DDDVPSTK.V/2

0.9982

1e+04

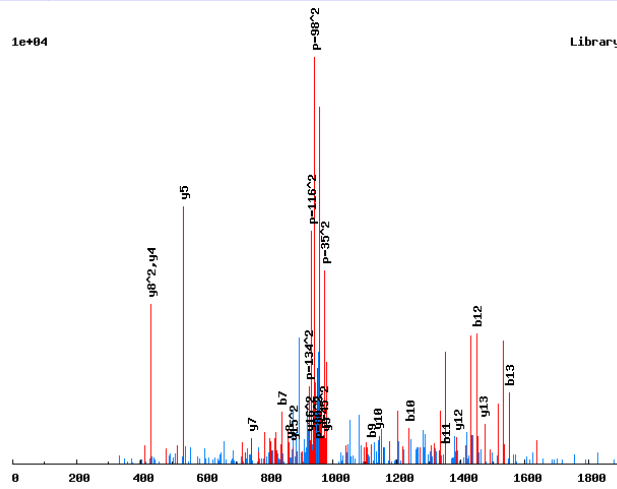

| Library | b <sup>1+</sup> | b <sup>2+</sup> | #  | AA     | #  | y <sup>1+</sup> | y <sup>2+</sup> |
|---------|-----------------|-----------------|----|--------|----|-----------------|-----------------|
|         | 130.0499        | 65.5286         | 1  | E      | 17 |                 |                 |
|         | 231.0975        | 116.0524        | 2  | T      | 16 | 1853.6960       | 927.3517        |
|         | 394.1609        | 197.5841        | 3  | Y      | 15 | 1752.6484       | 876.8278        |
|         | 509.1878        | 255.0975        | 4  | D      | 14 | 1589.5850       | 795.2962        |
|         | 596.2198        | 298.6136        | 5  | S      | 13 | 1474.5581       | 737.7827        |
|         | 710.2628        | 355.6350        | 6  | N      | 12 | 1387.5261       | 694.2667        |
|         | 839.3054        | 420.1563        | 7  | E      | 11 | 1273.4831       | 637.2452        |
|         | 1006.3037       | 503.6555        | 8  | S[167] | 10 | 1144.4405       | 572.7239        |
|         | 1121.3307       | 561.1690        | 9  | D      | 9  | 977.4422        | 489.2247        |
|         | 1236.3576       | 618.6824        | 10 | D      | 8  | 862.4152        | 431.7113        |
|         | 1351.3846       | 676.1959        | 11 | D      | 7  | 747.3883        | 374.1978        |
|         | 1450.4530       | 725.7301        | 12 | V      | 6  | 632.3614        | 316.6843        |
|         | 1551.5006       | 776.2540        | 13 | T      | 5  | 533.2930        | 267.1501        |
|         | 1648.5534       | 824.7803        | 14 | P      | 4  | 432.2453        | 216.6263        |
|         | 1735.5854       | 868.2964        | 15 | S      | 3  | 335.1925        | 168.0999        |
|         | 1836.6331       | 918.8202        | 16 | T      | 2  | 248.1605        | 124.5839        |
|         |                 |                 | 17 | K      | 1  | 147.1128        | 74.0600         |

# Annotated spectra from Saleem et. al. 2009

R.E.T.Y<sub>243</sub>-D.S.N.E.S<sub>167</sub>-D.D.D.V.T.P.S.T.K<sub>136</sub>-V/2

0.9989

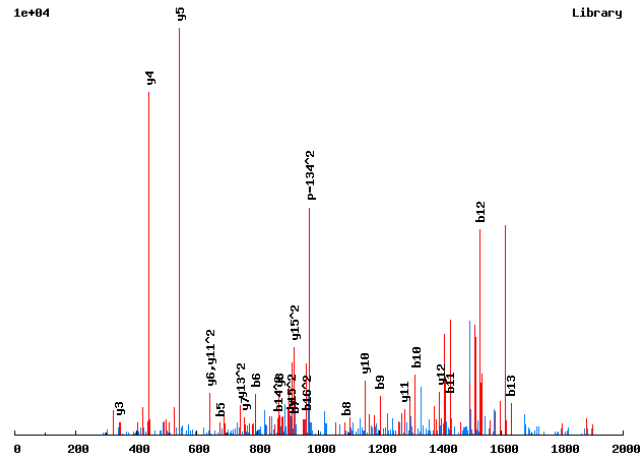

| Library | b <sup>1+</sup> | b <sup>2+</sup> | #  | AA     | #  | y <sup>1+</sup> | y <sup>2+</sup> |
|---------|-----------------|-----------------|----|--------|----|-----------------|-----------------|
|         | 130.0499        | 65.5286         | 1  | E      | 17 |                 |                 |
|         | 231.0975        | 116.0524        | 2  | T      | 16 | 1941.6766       | 971.3419        |
|         | 474.1272        | 237.5672        | 3  | Y[243] | 15 | 1840.6289       | 920.8181        |
|         | 589.1542        | 295.0807        | 4  | D      | 14 | 1597.5992       | 799.3033        |
|         | 676.1862        | 338.5967        | 5  | S      | 13 | 1482.5723       | 741.7898        |
|         | 790.2291        | 395.6182        | 6  | N      | 12 | 1395.5403       | 698.2738        |
|         | 919.2717        | 460.1395        | 7  | E      | 11 | 1281.4973       | 641.2523        |
|         | 1086.2701       | 543.6387        | 8  | S[167] | 10 | 1152.4547       | 576.7310        |
|         | 1201.2970       | 601.1521        | 9  | D      | 9  | 985.4564        | 493.2318        |
|         | 1316.3239       | 658.6656        | 10 | D      | 8  | 870.4294        | 435.7184        |
|         | 1431.3509       | 716.1791        | 11 | D      | 7  | 755.4025        | 378.2049        |
|         | 1530.4193       | 765.7133        | 12 | V      | 6  | 640.3756        | 320.6914        |
|         | 1631.4670       | 816.2371        | 13 | T      | 5  | 541.3071        | 271.1572        |
|         | 1728.5197       | 864.7635        | 14 | P      | 4  | 440.2595        | 220.6334        |
|         | 1815.5518       | 908.2795        | 15 | S      | 3  | 343.2067        | 172.1070        |
|         | 1916.5994       | 958.8034        | 16 | T      | 2  | 256.1747        | 128.5910        |
|         |                 |                 | 17 | K[136] | 1  | 155.1270        | 78.0671         |



# Annotated spectra from Saleem et. al. 2009

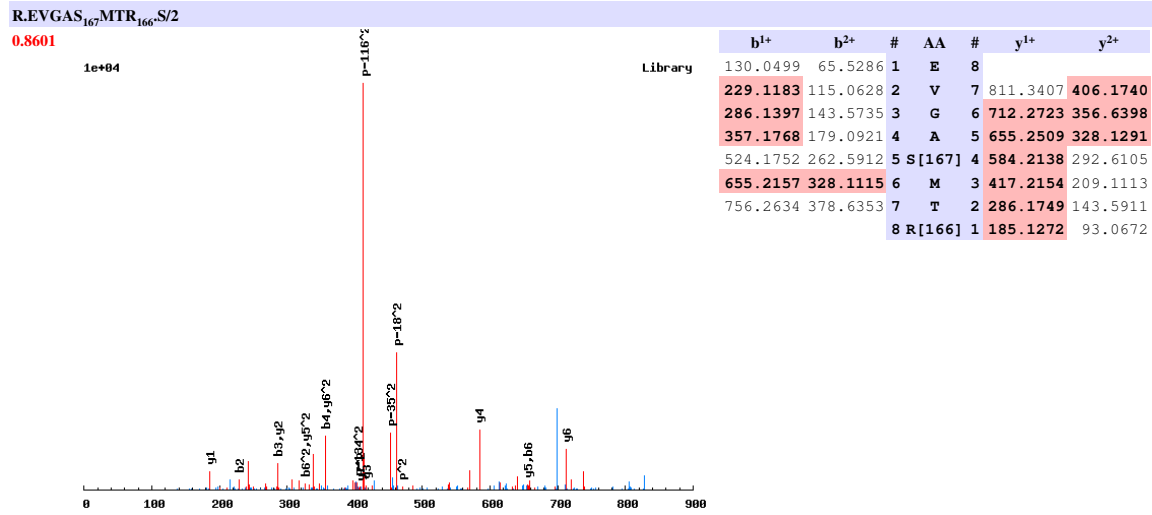

# Annotated spectra from Saleem et. al. 2009

REVS<sub>167</sub>PESFGLTAR.E/2

0.9999

1e+04

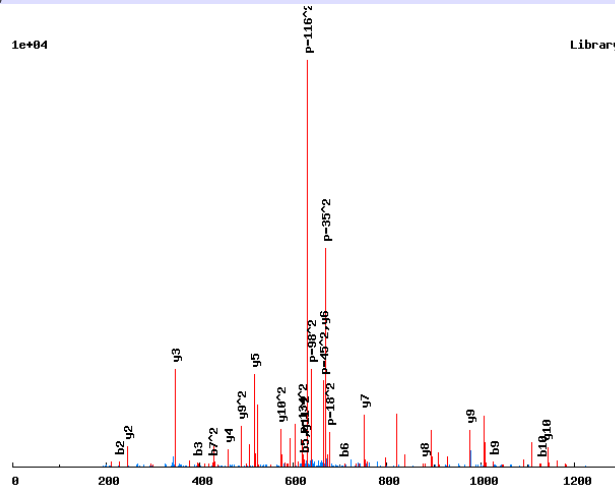

| Library | b <sup>1+</sup>  | b <sup>2+</sup> | #  | AA     | #  | y <sup>1+</sup> | y <sup>2+</sup> |
|---------|------------------|-----------------|----|--------|----|-----------------|-----------------|
|         | 130.0499         | 65.5286         | 1  | E      | 12 |                 |                 |
|         | <b>229.1183</b>  | 115.0628        | 2  | V      | 11 | 1243.5718       | <b>622.2896</b> |
|         | <b>396.1166</b>  | 198.5620        | 3  | S[167] | 10 | 1144.5034       | 572.7553        |
|         | 493.1694         | 247.0883        | 4  | P      | 9  | 977.5051        | <b>489.2562</b> |
|         | <b>622.2120</b>  | 311.6096        | 5  | E      | 8  | <b>880.4523</b> | 440.7298        |
|         | <b>709.2440</b>  | 355.1257        | 6  | S      | 7  | <b>751.4097</b> | 376.2085        |
|         | 856.3124         | <b>428.6599</b> | 7  | F      | 6  | <b>664.3777</b> | 332.6925        |
|         | 913.3339         | 457.1706        | 8  | G      | 5  | <b>517.3093</b> | 259.1583        |
|         | <b>1026.4180</b> | 513.7126        | 9  | L      | 4  | <b>460.2878</b> | 230.6475        |
|         | <b>1127.4656</b> | 564.2365        | 10 | T      | 3  | <b>347.2037</b> | 174.1055        |
|         | 1198.5027        | 599.7550        | 11 | A      | 2  | <b>246.1561</b> | 123.5817        |
|         |                  |                 | 12 | R      | 1  | 175.1190        | 88.0631         |

# Annotated spectra from Saleem et. al. 2009

K.EVVVPNNAS<sub>167</sub>PAS<sub>167</sub>ATGARPVSVSNGAANTER.E/3

0.9964

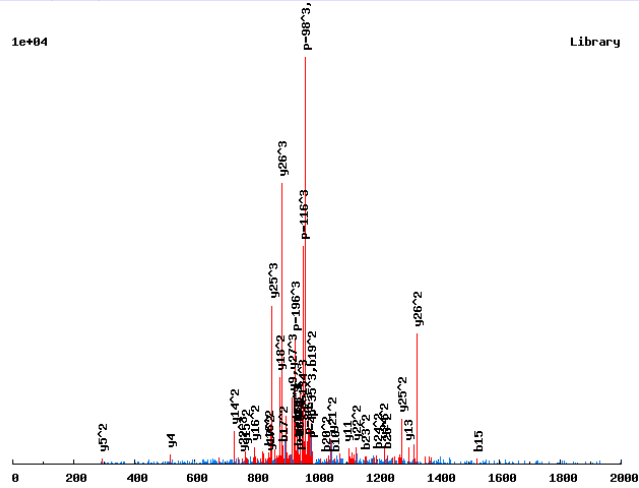

| Library | b <sup>1+</sup> | b <sup>2+</sup> | b <sup>3+</sup> | #  | AA     | #  | y <sup>1+</sup> | y <sup>2+</sup> | y <sup>3+</sup> |
|---------|-----------------|-----------------|-----------------|----|--------|----|-----------------|-----------------|-----------------|
|         | 130.0499        | 65.5286         | 44.0215         | 1  | E      | 29 |                 |                 |                 |
|         | 229.1183        | 115.0628        | 77.0443         | 2  | V      | 28 | 2854.2880       | 1427.6476       | 952.1009        |
|         | 328.1867        | 164.5970        | 110.0671        | 3  | V      | 27 | 2755.2196       | 1378.1134       | 919.0781        |
|         | 425.2394        | 213.1234        | 142.4180        | 4  | P      | 26 | 2656.1512       | 1328.5792       | 886.0553        |
|         | 539.2824        | 270.1448        | 180.4323        | 5  | N      | 25 | 2559.0984       | 1280.0529       | 853.7043        |
|         | 653.3253        | 327.1663        | 218.4466        | 6  | N      | 24 | 2445.0555       | 1223.0314       | 815.6900        |
|         | 724.3624        | 362.6848        | 242.1257        | 7  | A      | 23 | 2331.0126       | 1166.0099       | 777.6757        |
|         | 891.3608        | 446.1840        | 297.7918        | 8  | S[167] | 22 | 2259.9755       | 1130.4914       | 753.9967        |
|         | 988.4135        | 494.7104        | 330.1427        | 9  | P      | 21 | 2092.9771       | 1046.9922       | 698.3306        |
|         | 1059.4507       | 530.2290        | 353.8217        | 10 | A      | 20 | 1995.9243       | 998.4658        | 665.9796        |
|         | 1226.4490       | 613.7281        | 409.4879        | 11 | S[167] | 19 | 1924.8872       | 962.9473        | 642.3006        |
|         | 1297.4861       | 649.2467        | 433.1669        | 12 | A      | 18 | 1757.8889       | 879.4481        | 586.6345        |
|         | 1398.5338       | 699.7705        | 466.8495        | 13 | T      | 17 | 1686.8518       | 843.9295        | 562.9554        |
|         | 1455.5553       | 728.2813        | 485.8566        | 14 | G      | 16 | 1585.8041       | 793.4057        | 529.2729        |
|         | 1526.5924       | 763.7998        | 509.5356        | 15 | A      | 15 | 1528.7826       | 764.8949        | 510.2657        |
|         | 1682.6935       | 841.8504        | 561.5693        | 16 | R      | 14 | 1457.7455       | 729.3764        | 486.5867        |
|         | 1779.7462       | 890.3768        | 593.9203        | 17 | P      | 13 | 1301.6444       | 651.3258        | 434.5530        |
|         | 1878.8147       | 939.9110        | 626.9431        | 18 | V      | 12 | 1204.5916       | 602.7995        | 402.2021        |
|         | 1965.8467       | 983.4270        | 655.9537        | 19 | S      | 11 | 1105.5232       | 553.2653        | 369.1793        |
|         | 2064.9151       | 1032.9612       | 688.9766        | 20 | V      | 10 | 1018.4912       | 509.7492        | 340.1686        |
|         | 2151.9471       | 1076.4772       | 717.9872        | 21 | S      | 9  | 919.4228        | 460.2150        | 307.1458        |
|         | 2265.9901       | 1133.4987       | 756.0015        | 22 | N      | 8  | 832.3908        | 416.6990        | 278.1351        |
|         | 2323.0115       | 1162.0094       | 775.0087        | 23 | G      | 7  | 718.3478        | 359.6776        | 240.1208        |
|         | 2394.0486       | 1197.5280       | 798.6877        | 24 | A      | 6  | 661.3264        | 331.1668        | 221.1136        |
|         | 2465.0857       | 1233.0465       | 822.3668        | 25 | A      | 5  | 590.2893        | 295.6483        | 197.4346        |
|         | 2579.1287       | 1290.0680       | 860.3811        | 26 | N      | 4  | 519.2522        | 260.1297        | 173.7556        |
|         | 2680.1763       | 1340.5918       | 894.0636        | 27 | T      | 3  | 405.2092        | 203.1082        | 135.7413        |
|         | 2809.2189       | 1405.1131       | 937.0778        | 28 | E      | 2  | 304.1615        | 152.5844        | 102.0587        |
|         |                 |                 |                 | 29 | R      | 1  | 175.1190        | 88.0631         | 59.0445         |

# Annotated spectra from Saleem et. al. 2009

K.EVVS<sub>167</sub>S<sub>167</sub>PENR.E/2

0.8926

1e+04

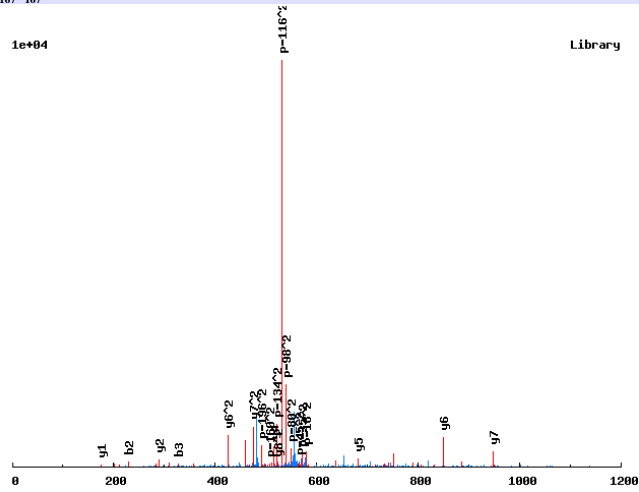

| Library | b <sup>1+</sup> | b <sup>2+</sup> | # | AA      | # | y <sup>1+</sup> | y <sup>2+</sup> |
|---------|-----------------|-----------------|---|---------|---|-----------------|-----------------|
|         | 130.0499        | 65.5286         | 1 | E       | 9 |                 |                 |
|         | 229.1183        | 115.0628        | 2 | V       | 8 | 1047.3908       | 524.1990        |
|         | 328.1867        | 164.5970        | 3 | V       | 7 | 948.3224        | 474.6648        |
|         | 495.1851        | 248.0962        | 4 | S [167] | 6 | 849.2540        | 425.1306        |
|         | 662.1834        | 331.5953        | 5 | S [167] | 5 | 682.2556        | 341.6314        |
|         | 759.2362        | 380.1217        | 6 | P       | 4 | 515.2572        | 258.1323        |
|         | 888.2788        | 444.6430        | 7 | E       | 3 | 418.2045        | 209.6059        |
|         | 1002.3217       | 501.6645        | 8 | N       | 2 | 289.1619        | 145.0846        |
|         |                 |                 | 9 | R       | 1 | 175.1190        | 88.0631         |

### Annotated spectra from Saleem et. al. 2009

R.EYLSAYPTLAHRDSS<sub>167</sub>SS<sub>167</sub>LSPR.G/3

0.9261

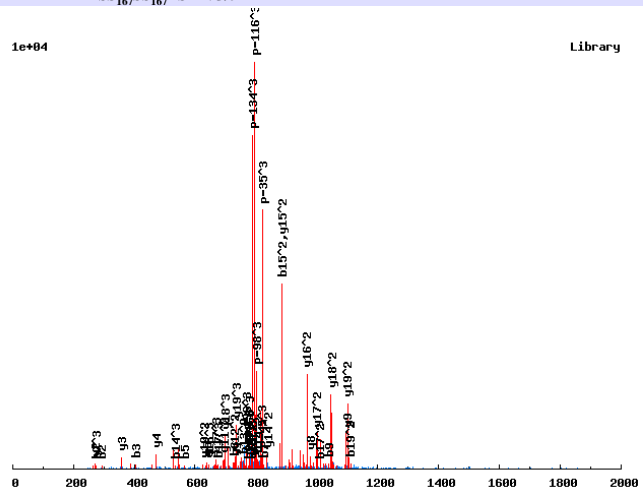

| Library | b <sup>1+</sup> | b <sup>2+</sup> | b <sup>3+</sup> | #  | AA     | #  | y <sup>1+</sup> | y <sup>2+</sup> | y <sup>3+</sup> |
|---------|-----------------|-----------------|-----------------|----|--------|----|-----------------|-----------------|-----------------|
|         | 130.0499        | 65.5286         | 44.0215         | 1  | E      | 21 |                 |                 |                 |
|         | 293.1132        | 147.0602        | 98.3759         | 2  | Y      | 20 | 2368.0370       | 1184.5221       | 790.0172        |
|         | 406.1973        | 203.6023        | 136.0706        | 3  | L      | 19 | 2204.9737       | 1102.9905       | 735.6627        |
|         | 493.2293        | 247.1183        | 165.0813        | 4  | S      | 18 | 2091.8896       | 1046.4485       | 697.9681        |
|         | 564.2664        | 282.6368        | 188.7603        | 5  | A      | 17 | 2004.8576       | 1002.9324       | 668.9574        |
|         | 727.3297        | 364.1685        | 243.1148        | 6  | Y      | 16 | 1933.8205       | 967.4139        | 645.2783        |
|         | 824.3825        | 412.6949        | 275.4657        | 7  | P      | 15 | 1770.7572       | 885.8822        | 590.9239        |
|         | 925.4302        | 463.2187        | 309.1482        | 8  | T      | 14 | 1673.7044       | 837.3558        | 558.5730        |
|         | 1038.5142       | 519.7608        | 346.8429        | 9  | L      | 13 | 1572.6567       | 786.8320        | 524.8904        |
|         | 1109.5513       | 555.2793        | 370.5220        | 10 | A      | 12 | 1459.5727       | 730.2900        | 487.1957        |
|         | 1246.6103       | 623.8088        | 416.2083        | 11 | H      | 11 | 1388.5355       | 694.7714        | 463.5167        |
|         | 1402.7114       | 701.8593        | 468.2420        | 12 | R      | 10 | 1251.4766       | 626.2420        | 417.8304        |
|         | 1517.7383       | 759.3728        | 506.5843        | 13 | D      | 9  | 1095.3755       | 548.1914        | 365.7967        |
|         | 1604.7703       | 802.8888        | 535.5950        | 14 | S      | 8  | 980.3486        | 490.6779        | 327.4544        |
|         | 1771.7687       | 886.3880        | 591.2611        | 15 | S[167] | 7  | 893.3166        | 447.1619        | 298.4437        |
|         | 1858.8007       | 929.9040        | 620.2718        | 16 | S      | 6  | 726.3182        | 363.6627        | 242.7776        |
|         | 2025.7991       | 1013.4032       | 675.9379        | 17 | S[167] | 5  | 639.2862        | 320.1467        | 213.7669        |
|         | 2138.8831       | 1069.9452       | 713.6326        | 18 | L      | 4  | 472.2878        | 236.6475        | 158.1008        |
|         | 2225.9152       | 1113.4612       | 742.6432        | 19 | S      | 3  | 359.2037        | 180.1055        | 120.4061        |
|         | 2322.9679       | 1161.9876       | 774.9942        | 20 | P      | 2  | 272.1717        | 136.5895        | 91.3954         |
|         |                 |                 |                 | 21 | R      | 1  | 175.1190        | 88.0631         | 59.0445         |

# Annotated spectra from Saleem et. al. 2009

REYS<sub>167</sub>NVDQYGR<sub>166</sub>R/2

0.9996

1e+04

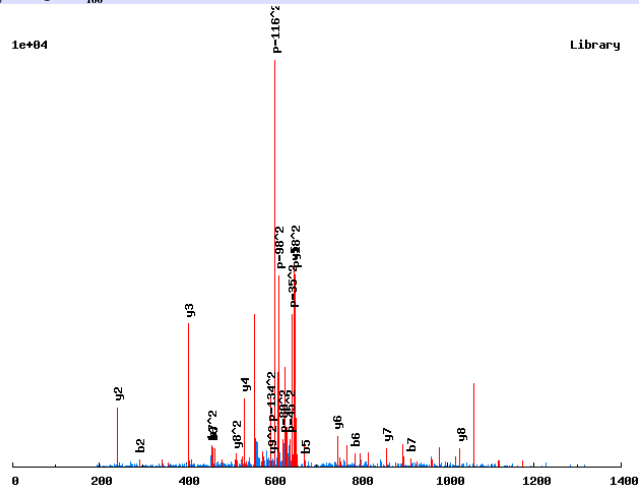

| Library | b <sup>1+</sup> | b <sup>2+</sup> | #  | AA     | #  | y <sup>1+</sup> | y <sup>2+</sup> |
|---------|-----------------|-----------------|----|--------|----|-----------------|-----------------|
|         | 130.0499        | 65.5286         | 1  | E      | 10 |                 |                 |
|         | 293.1132        | 147.0602        | 2  | Y      | 9  | 1191.4706       | 596.2389        |
|         | 460.1116        | 230.5594        | 3  | S[167] | 8  | 1028.4072       | 514.7073        |
|         | 574.1545        | 287.5809        | 4  | N      | 7  | 861.4089        | 431.2081        |
|         | 673.2229        | 337.1151        | 5  | V      | 6  | 747.3659        | 374.1866        |
|         | 788.2498        | 394.6286        | 6  | D      | 5  | 648.2975        | 324.6524        |
|         | 916.3084        | 458.6579        | 7  | Q      | 4  | 533.2706        | 267.1389        |
|         | 1079.3718       | 540.1895        | 8  | Y      | 3  | 405.2120        | 203.1096        |
|         | 1136.3932       | 568.7002        | 9  | G      | 2  | 242.1487        | 121.5780        |
|         |                 |                 | 10 | R[166] | 1  | 185.1272        | 93.0672         |

# Annotated spectra from Saleem et. al. 2009

K.EYVPLDNAEQSTSS<sub>167</sub>S<sub>167</sub>QETKETEEEEPK.K/3

0.7155

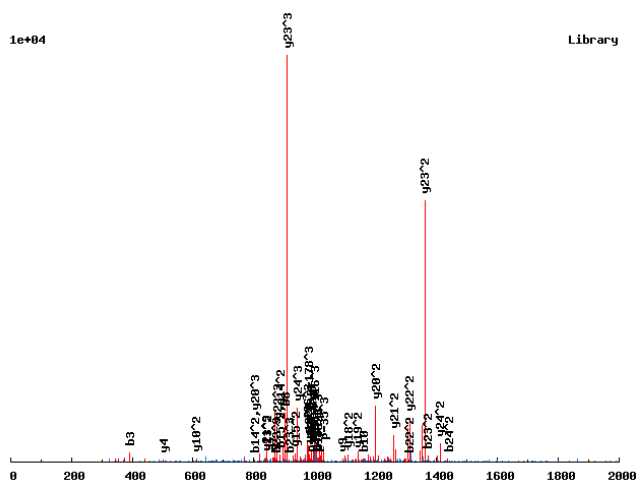

| Library | b <sup>1+</sup>  | b <sup>2+</sup>  | b <sup>3+</sup> | #  | AA     | #  | y <sup>1+</sup>  | y <sup>2+</sup>  | y <sup>3+</sup> |
|---------|------------------|------------------|-----------------|----|--------|----|------------------|------------------|-----------------|
|         | 130.0499         | 65.5286          | 44.0215         | 1  | E      | 26 |                  |                  |                 |
|         | 293.1132         | 147.0602         | 98.3759         | 2  | Y      | 25 | 2986.2126        | 1493.6099        | 996.0757        |
|         | <b>392.1816</b>  | 196.5944         | 131.3987        | 3  | V      | 24 | 2823.1493        | <b>1412.0783</b> | <b>941.7213</b> |
|         | 489.2344         | 245.1208         | 163.7496        | 4  | P      | 23 | 2724.0808        | <b>1362.5441</b> | <b>908.6985</b> |
|         | 602.3184         | 301.6629         | 201.4443        | 5  | L      | 22 | 2627.0281        | <b>1314.0177</b> | <b>876.3475</b> |
|         | 717.3454         | 359.1763         | 239.7866        | 6  | D      | 21 | 2513.9440        | <b>1257.4757</b> | <b>838.6529</b> |
|         | 831.3883         | 416.1978         | 277.8010        | 7  | N      | 20 | 2398.9171        | <b>1199.9622</b> | <b>800.3105</b> |
|         | <b>902.4254</b>  | 451.7163         | 301.4800        | 8  | A      | 19 | 2284.8742        | <b>1142.9407</b> | 762.2962        |
|         | 1031.4680        | 516.2376         | 344.4942        | 9  | E      | 18 | 2213.8370        | <b>1107.4222</b> | 738.6172        |
|         | <b>1159.5266</b> | 580.2669         | 387.1804        | 10 | Q      | 17 | 2084.7945        | 1042.9009        | 695.6030        |
|         | 1246.5586        | 623.7829         | 416.1911        | 11 | S      | 16 | 1956.7359        | <b>978.8716</b>  | 652.9168        |
|         | 1347.6063        | 674.3068         | 449.8736        | 12 | T      | 15 | 1869.7038        | <b>935.3556</b>  | 623.9061        |
|         | 1434.6383        | 717.8228         | 478.8843        | 13 | S      | 14 | 1768.6562        | <b>884.8317</b>  | 590.2236        |
|         | 1601.6367        | <b>801.3220</b>  | 534.5504        | 14 | S[167] | 13 | 1681.6241        | <b>841.3157</b>  | 561.2129        |
|         | 1768.6350        | <b>884.8212</b>  | 590.2165        | 15 | S[167] | 12 | 1514.6258        | 757.8165         | 505.5468        |
|         | 1896.6936        | 948.8505         | 632.9027        | 16 | Q      | 11 | 1347.6274        | 674.3173         | 449.8807        |
|         | 2025.7362        | <b>1013.3717</b> | 675.9169        | 17 | E      | 10 | 1219.5688        | <b>610.2881</b>  | 407.1945        |
|         | 2126.7839        | 1063.8956        | 709.5995        | 18 | T      | 9  | <b>1090.5262</b> | 545.7668         | 364.1803        |
|         | 2254.8789        | 1127.9431        | 752.2978        | 19 | K      | 8  | <b>989.4786</b>  | 495.2429         | 330.4977        |
|         | 2383.9214        | 1192.4644        | 795.3120        | 20 | E      | 7  | <b>861.3836</b>  | 431.1954         | 287.7994        |
|         | 2484.9691        | 1242.9882        | 828.9946        | 21 | T      | 6  | 732.3410         | 366.6741         | 244.7852        |
|         | 2614.0117        | <b>1307.5095</b> | <b>872.0088</b> | 22 | E      | 5  | 631.2933         | 316.1503         | 211.1026        |
|         | 2743.0543        | <b>1372.0308</b> | <b>915.0230</b> | 23 | E      | 4  | <b>502.2507</b>  | 251.6290         | 168.0884        |
|         | 2872.0969        | <b>1436.5521</b> | 958.0372        | 24 | E      | 3  | 373.2081         | 187.1077         | 125.0742        |
|         | 2969.1497        | 1485.0785        | <b>990.3881</b> | 25 | P      | 2  | 244.1656         | 122.5864         | 82.0600         |
|         |                  |                  |                 | 26 | K      | 1  | 147.1128         | 74.0600          | 49.7091         |

# Annotated spectra from Saleem et. al. 2009

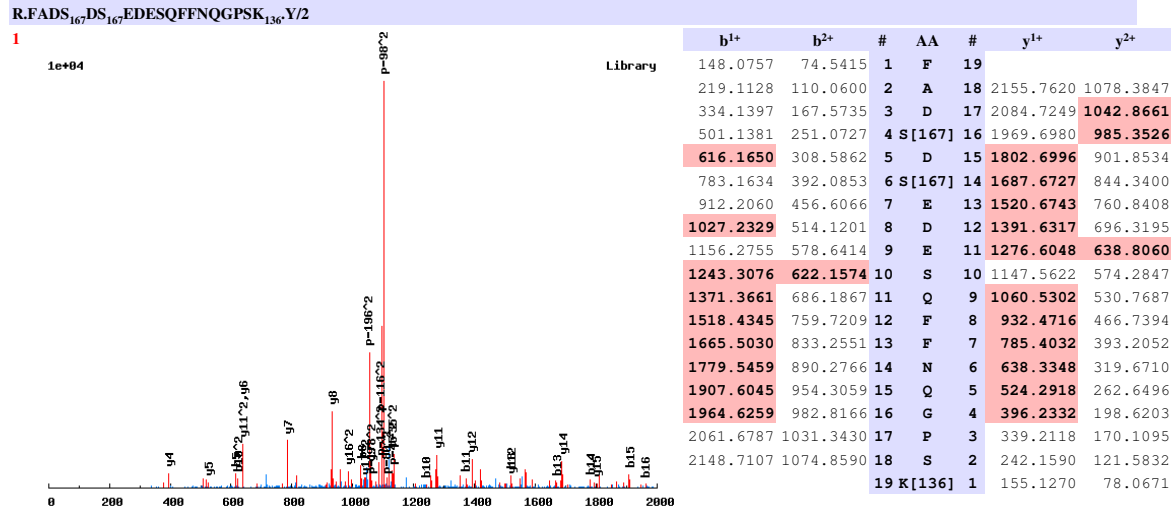



# Annotated spectra from Saleem et. al. 2009

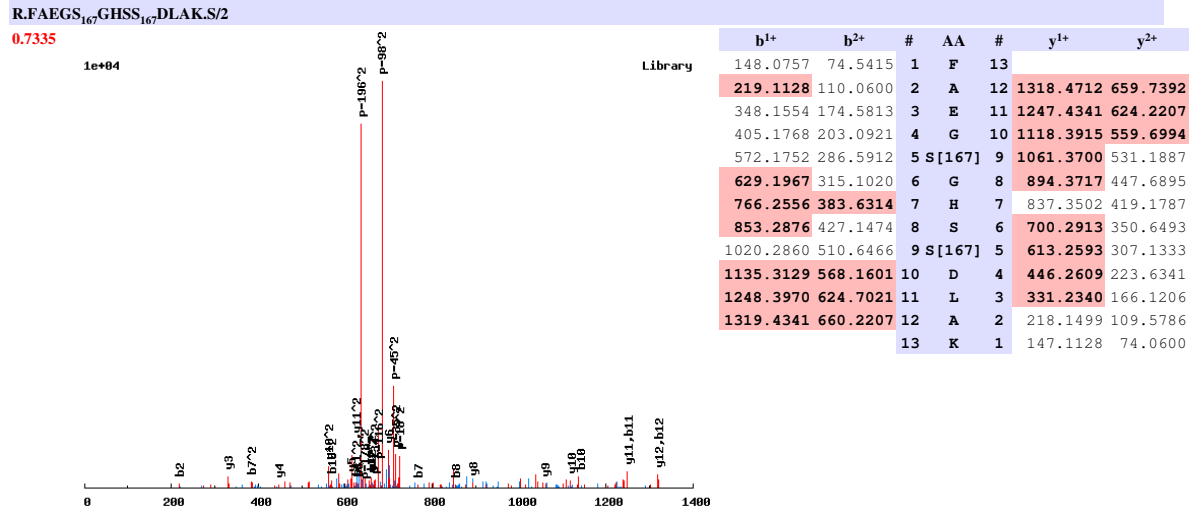

# Annotated spectra from Saleem et. al. 2009

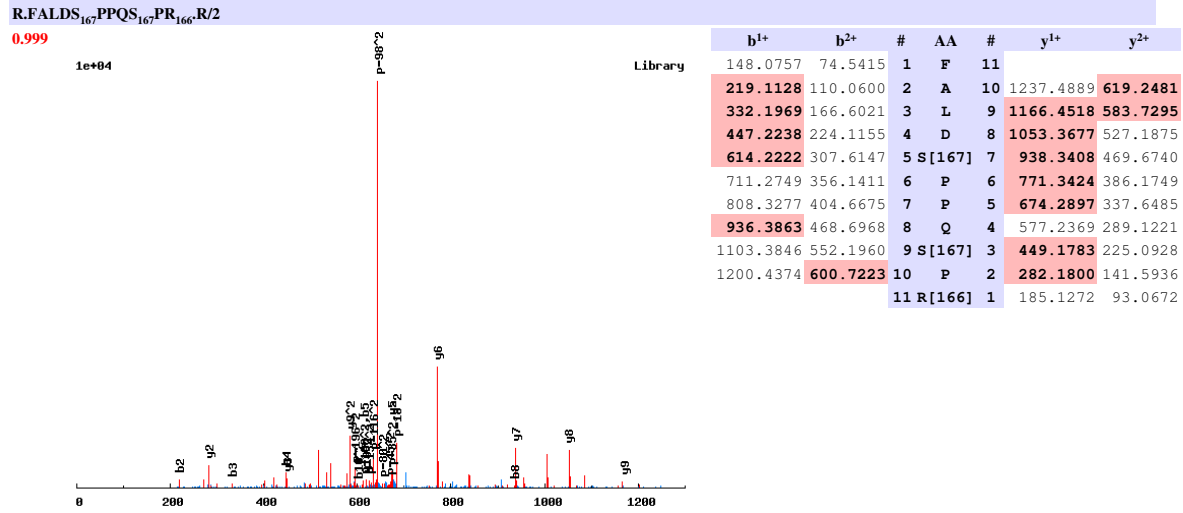

# Annotated spectra from Saleem et. al. 2009

K.FANLS<sub>167</sub>-LHEK<sub>136</sub>-T/2

0.9601

1e+04

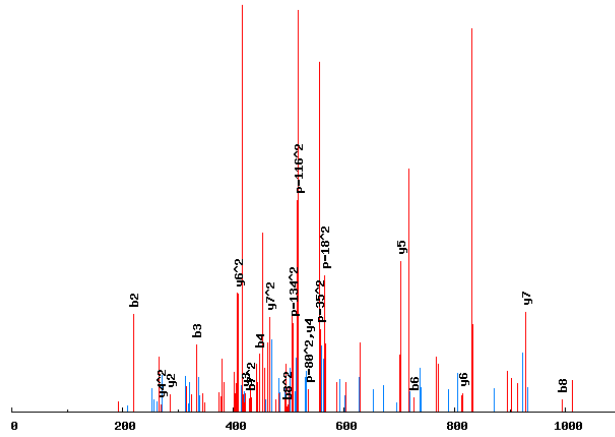

Library

| b <sup>1+</sup> | b <sup>2+</sup> | # | AA     | # | y <sup>1+</sup> | y <sup>2+</sup> |
|-----------------|-----------------|---|--------|---|-----------------|-----------------|
| 148.0757        | 74.5415         | 1 | F      | 9 |                 |                 |
| 219.1128        | 110.0600        | 2 | A      | 8 | 999.4750        | 500.2412        |
| 333.1557        | 167.0815        | 3 | N      | 7 | 928.4379        | 464.7226        |
| 446.2398        | 223.6235        | 4 | L      | 6 | 814.3950        | 407.7011        |
| 613.2382        | 307.1227        | 5 | S[167] | 5 | 701.3109        | 351.1591        |
| 726.3222        | 363.6647        | 6 | L      | 4 | 534.3126        | 267.6599        |
| 863.3811        | 432.1942        | 7 | H      | 3 | 421.2285        | 211.1179        |
| 992.4237        | 496.7155        | 8 | E      | 2 | 284.1696        | 142.5884        |
|                 |                 | 9 | K[136] | 1 | 155.1270        | 78.0671         |

# Annotated spectra from Saleem et. al. 2009

R.FAS<sub>167</sub>VSPY<sub>243</sub>PK<sub>136</sub>F/2

0.9995

1e+04

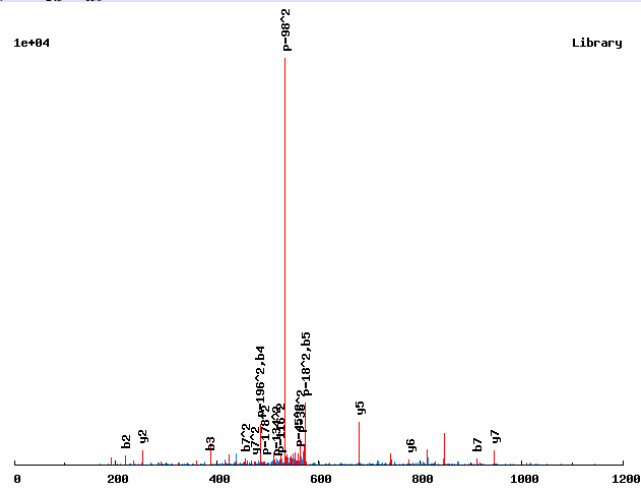

| Library | b <sup>1+</sup> | b <sup>2+</sup> | # | AA      | # | y <sup>1+</sup> | y <sup>2+</sup> |
|---------|-----------------|-----------------|---|---------|---|-----------------|-----------------|
|         | 148.0757        | 74.5415         | 1 | F       | 9 |                 |                 |
|         | 219.1128        | 110.0600        | 2 | A       | 8 | 1016.3981       | 508.7027        |
|         | 386.1112        | 193.5592        | 3 | S [167] | 7 | 945.3610        | 473.1841        |
|         | 485.1796        | 243.0934        | 4 | V       | 6 | 778.3626        | 389.6850        |
|         | 572.2116        | 286.6094        | 5 | S       | 5 | 679.2942        | 340.1507        |
|         | 669.2644        | 335.1358        | 6 | P       | 4 | 592.2622        | 296.6347        |
|         | 912.2940        | 456.6507        | 7 | Y [243] | 3 | 495.2094        | 248.1083        |
|         | 1009.3468       | 505.1770        | 8 | P       | 2 | 252.1798        | 126.5935        |
|         |                 |                 | 9 | K [136] | 1 | 155.1270        | 78.0671         |

# Annotated spectra from Saleem et. al. 2009

K.FATVPTGGASSAAAGAAGAAAGGDAEEEEKEEEAKEES<sub>167</sub>DDDMGFLFD<sub>-3</sub>

0.9687

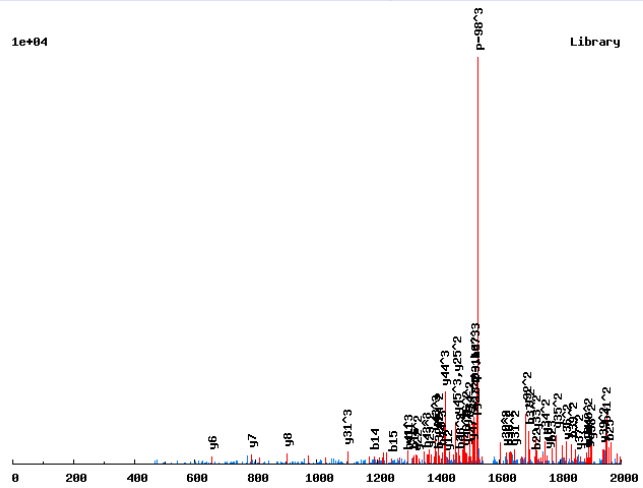

| Library | b <sup>1+</sup> | b <sup>2+</sup> | b <sup>3+</sup> | #  | AA     | #  | y <sup>1+</sup> | y <sup>2+</sup> | y <sup>3+</sup> |
|---------|-----------------|-----------------|-----------------|----|--------|----|-----------------|-----------------|-----------------|
|         | 148.0757        | 74.5415         | 50.0301         | 1  | F      | 48 |                 |                 |                 |
|         | 219.1128        | 110.0600        | 73.7091         | 2  | A      | 47 | 4539.8776       | 2270.4424       | 1513.9641       |
|         | 320.1605        | 160.5839        | 107.3917        | 3  | T      | 46 | 4468.8405       | 2234.9239       | 1490.2850       |
|         | 419.2289        | 210.1181        | 140.4145        | 4  | V      | 45 | 4367.7928       | 2184.4001       | 1456.6025       |
|         | 516.2817        | 258.6445        | 172.7654        | 5  | P      | 44 | 4268.7244       | 2134.8658       | 1423.5797       |
|         | 617.3293        | 309.1683        | 206.4480        | 6  | T      | 43 | 4171.6717       | 2086.3395       | 1391.2287       |
|         | 674.3508        | 337.6790        | 225.4551        | 7  | G      | 42 | 4070.6240       | 2035.8156       | 1357.5462       |
|         | 731.3723        | 366.1898        | 244.4623        | 8  | G      | 41 | 4013.6025       | 2007.3049       | 1338.5390       |
|         | 802.4094        | 401.7083        | 268.1413        | 9  | A      | 40 | 3956.5811       | 1978.7942       | 1319.5319       |
|         | 889.4414        | 445.2243        | 297.1520        | 10 | S      | 39 | 3885.5439       | 1943.2756       | 1295.8528       |
|         | 976.4734        | 488.7404        | 326.1627        | 11 | S      | 38 | 3798.5119       | 1899.7596       | 1266.8422       |
|         | 1047.5105       | 524.2589        | 349.8417        | 12 | A      | 37 | 3711.4799       | 1856.2436       | 1237.8315       |
|         | 1118.5476       | 559.7775        | 373.5207        | 13 | A      | 36 | 3640.4428       | 1820.7250       | 1214.1524       |
|         | 1189.5848       | 595.2960        | 397.1998        | 14 | A      | 35 | 3569.4057       | 1785.2065       | 1190.4734       |
|         | 1246.6062       | 623.8067        | 416.2069        | 15 | G      | 34 | 3498.3686       | 1749.6879       | 1166.7944       |
|         | 1317.6433       | 659.3253        | 439.8860        | 16 | A      | 33 | 3441.3471       | 1721.1772       | 1147.7872       |
|         | 1388.6804       | 694.8439        | 463.5650        | 17 | A      | 32 | 3370.3100       | 1685.6586       | 1124.1082       |
|         | 1445.7019       | 723.3546        | 482.5722        | 18 | G      | 31 | 3299.2729       | 1650.1401       | 1100.4291       |
|         | 1516.7390       | 758.8731        | 506.2512        | 19 | A      | 30 | 3242.2514       | 1621.6293       | 1081.4220       |
|         | 1587.7761       | 794.3917        | 529.9302        | 20 | A      | 29 | 3171.2143       | 1586.1108       | 1057.7430       |
|         | 1658.8132       | 829.9103        | 553.6093        | 21 | A      | 28 | 3100.1772       | 1550.5922       | 1034.0639       |
|         | 1715.8347       | 858.4210        | 572.6164        | 22 | G      | 27 | 3029.1401       | 1515.0737       | 1010.3849       |
|         | 1772.8561       | 886.9317        | 591.6236        | 23 | G      | 26 | 2972.1186       | 1486.5630       | 991.3777        |
|         | 1887.8831       | 944.4452        | 629.9659        | 24 | D      | 25 | 2915.0972       | 1458.0522       | 972.3706        |
|         | 1958.9202       | 979.9637        | 653.6449        | 25 | A      | 24 | 2800.0702       | 1400.5388       | 934.0283        |
|         | 2029.9573       | 1015.4823       | 677.3240        | 26 | A      | 23 | 2729.0331       | 1365.0202       | 910.3492        |
|         | 2158.9999       | 1080.0036       | 720.3381        | 27 | E      | 22 | 2657.9960       | 1329.5016       | 886.6702        |
|         | 2288.0425       | 1144.5249       | 763.3523        | 28 | E      | 21 | 2528.9534       | 1264.9803       | 843.6560        |
|         | 2417.0851       | 1209.0462       | 806.3665        | 29 | E      | 20 | 2399.9108       | 1200.4591       | 800.6418        |
|         | 2545.1800       | 1273.0937       | 849.0649        | 30 | K      | 19 | 2270.8682       | 1135.9378       | 757.6276        |
|         | 2674.2226       | 1337.6149       | 892.0791        | 31 | E      | 18 | 2142.7733       | 1071.8903       | 714.9293        |
|         | 2803.2652       | 1402.1362       | 935.0933        | 32 | E      | 17 | 2013.7307       | 1007.3690       | 671.9151        |
|         | 2932.3078       | 1466.6575       | 978.1075        | 33 | E      | 16 | 1884.6881       | 942.8477        | 628.9009        |
|         | 3003.3449       | 1502.1761       | 1001.7865       | 34 | A      | 15 | 1755.6455       | 878.3264        | 585.8867        |
|         | 3131.4399       | 1566.2236       | 1044.4848       | 35 | K      | 14 | 1684.6084       | 842.8078        | 562.2077        |
|         | 3260.4825       | 1630.7449       | 1087.4990       | 36 | E      | 13 | 1556.5134       | 778.7604        | 519.5093        |
|         | 3389.5250       | 1695.2662       | 1130.5132       | 37 | E      | 12 | 1427.4708       | 714.2391        | 476.4951        |
|         | 3556.5234       | 1778.7653       | 1186.1793       | 38 | S[167] | 11 | 1298.4283       | 649.7178        | 433.4809        |
|         | 3671.5504       | 1836.2788       | 1224.5216       | 39 | D      | 10 | 1131.4299       | 566.2186        | 377.8148        |
|         | 3786.5773       | 1893.7923       | 1262.8640       | 40 | D      | 9  | 1016.4030       | 508.7051        | 339.4725        |
|         | 3901.6042       | 1951.3058       | 1301.2063       | 41 | D      | 8  | 901.3760        | 451.1916        | 301.1302        |
|         | 4032.6447       | 2016.8260       | 1344.8864       | 42 | M      | 7  | 786.3491        | 393.6782        | 262.7879        |
|         | 4089.6662       | 2045.3367       | 1363.8936       | 43 | G      | 6  | 655.3086        | 328.1579        | 219.1077        |
|         | 4236.7346       | 2118.8709       | 1412.9164       | 44 | F      | 5  | 598.2871        | 299.6472        | 200.1006        |
|         | 4293.7561       | 2147.3817       | 1431.9235       | 45 | G      | 4  | 451.2187        | 226.1130        | 151.0778        |
|         | 4406.8401       | 2203.9237       | 1469.6182       | 46 | L      | 3  | 394.1972        | 197.6023        | 132.0706        |
|         | 4553.9085       | 2277.4579       | 1518.6410       | 47 | F      | 2  | 281.1132        | 141.0602        | 94.3759         |
|         |                 |                 |                 | 48 | D      | 1  | 134.0448        | 67.5260         | 45.3531         |

# Annotated spectra from Saleem et. al. 2009

R.FDEDGK<sub>136</sub>S<sub>167</sub>IR<sub>166</sub>.D/2

0.9994

1e+04

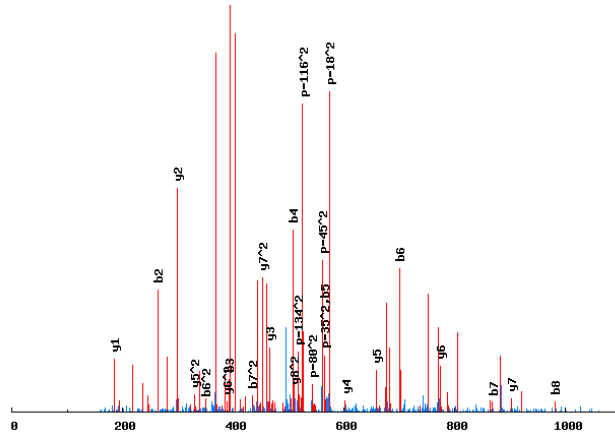

| Library | b <sup>1+</sup> | b <sup>2+</sup> | # | AA     | # | y <sup>1+</sup> | y <sup>2+</sup> |
|---------|-----------------|-----------------|---|--------|---|-----------------|-----------------|
|         | 148.0757        | 74.5415         | 1 | F      | 9 |                 |                 |
|         | 263.1026        | 132.0550        | 2 | D      | 8 | 1017.4367       | 509.2220        |
|         | 392.1452        | 196.5762        | 3 | E      | 7 | 902.4098        | 451.7085        |
|         | 507.1722        | 254.0897        | 4 | D      | 6 | 773.3672        | 387.1872        |
|         | 564.1936        | 282.6005        | 5 | G      | 5 | 658.3403        | 329.6738        |
|         | 700.3028        | 350.6550        | 6 | K[136] | 4 | 601.3188        | 301.1630        |
|         | 867.3011        | 434.1542        | 7 | S[167] | 3 | 465.2096        | 233.1085        |
|         | 980.3852        | 490.6962        | 8 | I      | 2 | 298.2113        | 149.6093        |
|         |                 |                 |   | R[166] | 1 | 185.1272        | 93.0672         |

## Annotated spectra from Saleem et. al. 2009

R.FDS<sub>167</sub>NVS<sub>167</sub>VAVDER-/2

0.9888

1e+04

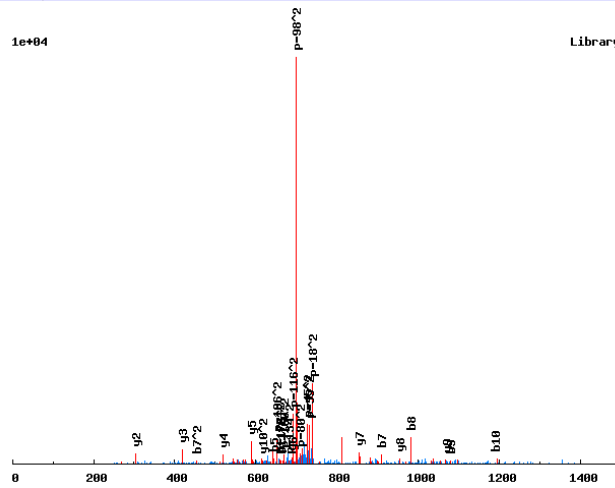

| Library | b <sup>1+</sup> | b <sup>2+</sup> | #  | AA     | #  | y <sup>1+</sup> | y <sup>2+</sup> |
|---------|-----------------|-----------------|----|--------|----|-----------------|-----------------|
|         | 148.0757        | 74.5415         | 1  | F      | 12 |                 |                 |
|         | 263.1026        | 132.0550        | 2  | D      | 11 | 1350.4974       | 675.7523        |
|         | 430.1010        | 215.5541        | 3  | S[167] | 10 | 1235.4705       | 618.2389        |
|         | 544.1439        | 272.5756        | 4  | N      | 9  | 1068.4721       | 534.7397        |
|         | 643.2123        | 322.1098        | 5  | V      | 8  | 954.4292        | 477.7182        |
|         | 810.2107        | 405.6090        | 6  | S[167] | 7  | 855.3608        | 428.1840        |
|         | 909.2791        | 455.1432        | 7  | V      | 6  | 688.3624        | 344.6848        |
|         | 980.3162        | 490.6617        | 8  | A      | 5  | 589.2940        | 295.1506        |
|         | 1079.3846       | 540.1960        | 9  | V      | 4  | 518.2569        | 259.6321        |
|         | 1194.4116       | 597.7094        | 10 | D      | 3  | 419.1885        | 210.0979        |
|         | 1323.4542       | 662.2307        | 11 | E      | 2  | 304.1615        | 152.5844        |
|         |                 |                 | 12 | R      | 1  | 175.1190        | 88.0631         |

# Annotated spectra from Saleem et. al. 2009

R.FDS<sub>167</sub>SKLEASTTK.Y/2

0.9984

1e+04

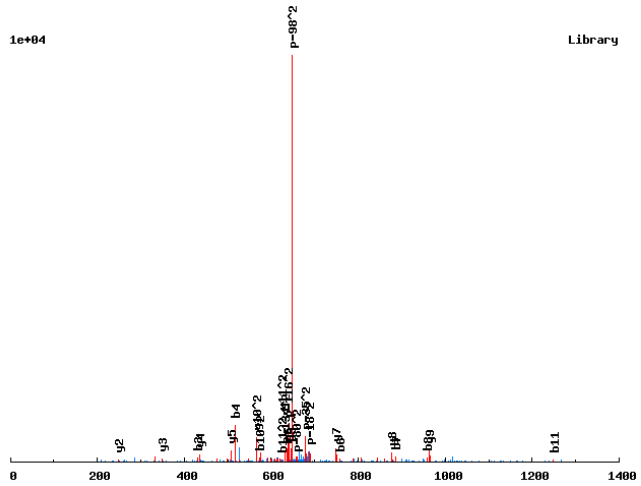

| Library | b <sup>1+</sup> | b <sup>2+</sup> | #  | AA     | #  | y <sup>1+</sup> | y <sup>2+</sup> |
|---------|-----------------|-----------------|----|--------|----|-----------------|-----------------|
|         | 148.0757        | 74.5415         | 1  | F      | 12 |                 |                 |
|         | 263.1026        | 132.0550        | 2  | D      | 11 | 1246.5562       | 623.7818        |
|         | 430.1010        | 215.5541        | 3  | S[167] | 10 | 1131.5293       | 566.2683        |
|         | 517.1330        | 259.0702        | 4  | S      | 9  | 964.5309        | 482.7691        |
|         | 645.2280        | 323.1176        | 5  | K      | 8  | 877.4989        | 439.2531        |
|         | 758.3120        | 379.6597        | 6  | L      | 7  | 749.4040        | 375.2056        |
|         | 887.3546        | 444.1810        | 7  | E      | 6  | 636.3199        | 318.6636        |
|         | 958.3917        | 479.6995        | 8  | A      | 5  | 507.2773        | 254.1423        |
|         | 1045.4238       | 523.2155        | 9  | S      | 4  | 436.2402        | 218.6237        |
|         | 1146.4715       | 573.7394        | 10 | T      | 3  | 349.2082        | 175.1077        |
|         | 1247.5191       | 624.2632        | 11 | T      | 2  | 248.1605        | 124.5839        |
|         |                 |                 | 12 | K      | 1  | 147.1128        | 74.0600         |



# Annotated spectra from Saleem et. al. 2009

R.FEETS<sub>167</sub>-LKS<sub>167</sub>-NK.V/2

0.7058

1e+04

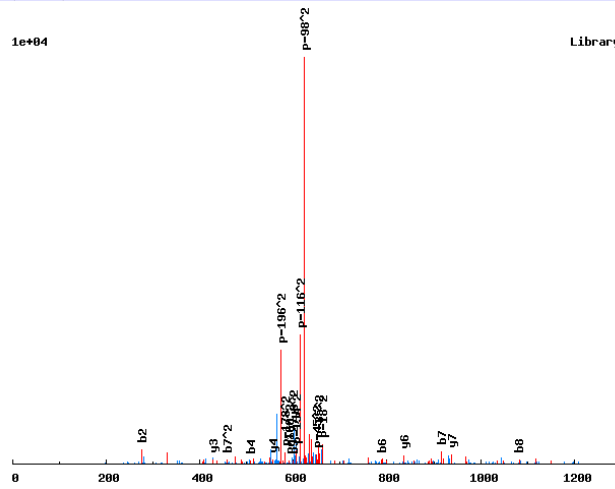

| Library | b <sup>1+</sup>  | b <sup>2+</sup> | #  | AA     | #  | y <sup>1+</sup> | y <sup>2+</sup> |
|---------|------------------|-----------------|----|--------|----|-----------------|-----------------|
|         | 148.0757         | 74.5415         | 1  | F      | 10 |                 |                 |
|         | <b>277.1183</b>  | 139.0628        | 2  | E      | 9  | 1195.4643       | <b>598.2358</b> |
|         | 406.1609         | 203.5841        | 3  | E      | 8  | 1066.4217       | 533.7145        |
|         | <b>507.2086</b>  | 254.1079        | 4  | T      | 7  | <b>937.3792</b> | 469.1932        |
|         | 674.2069         | 337.6071        | 5  | S[167] | 6  | <b>836.3315</b> | 418.6694        |
|         | <b>787.2910</b>  | 394.1491        | 6  | L      | 5  | 669.3331        | 335.1702        |
|         | <b>915.3859</b>  | <b>458.1966</b> | 7  | K      | 4  | <b>556.2491</b> | 278.6282        |
|         | <b>1082.3843</b> | 541.6958        | 8  | S[167] | 3  | <b>428.1541</b> | 214.5807        |
|         | 1196.4272        | <b>598.7173</b> | 9  | N      | 2  | 261.1557        | 131.0815        |
|         |                  |                 | 10 | K      | 1  | 147.1128        | 74.0600         |

# Annotated spectra from Saleem et. al. 2009

K.FEGS<sub>167</sub>DDDENHPLPLNVAK.G/3

0.8794

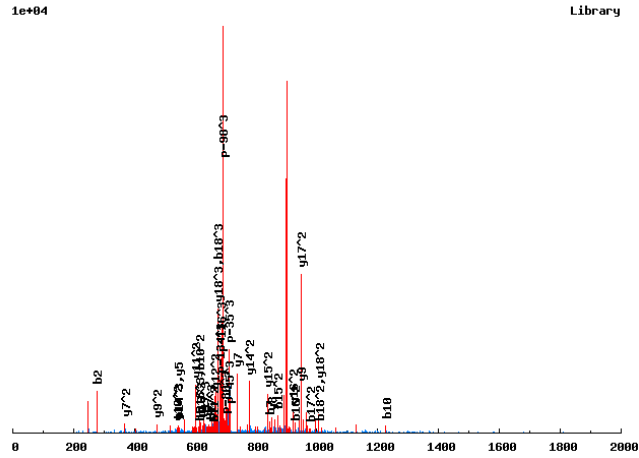

| Library | b <sup>1+</sup>  | b <sup>2+</sup>  | b <sup>3+</sup> | #  | AA     | #  | y <sup>1+</sup> | y <sup>2+</sup>  | y <sup>3+</sup> |
|---------|------------------|------------------|-----------------|----|--------|----|-----------------|------------------|-----------------|
|         | 148.0757         | 74.5415          | 50.0301         | 1  | F      | 19 |                 |                  |                 |
|         | <b>277.1183</b>  | 139.0628         | 93.0443         | 2  | E      | 18 | 2026.8753       | <b>1013.9413</b> | <b>676.2966</b> |
|         | 334.1397         | 167.5735         | 112.0514        | 3  | G      | 17 | 1897.8327       | <b>949.4200</b>  | <b>633.2824</b> |
|         | 501.1381         | 251.0727         | 167.7176        | 4  | S[167] | 16 | 1840.8113       | <b>920.9093</b>  | <b>614.2753</b> |
|         | <b>616.1650</b>  | 308.5862         | 206.0599        | 5  | D      | 15 | 1673.8129       | <b>837.4101</b>  | 558.6092        |
|         | 731.1920         | 366.0996         | 244.4022        | 6  | D      | 14 | 1558.7860       | <b>779.8966</b>  | 520.2668        |
|         | <b>846.2189</b>  | 423.6131         | 282.7445        | 7  | D      | 13 | 1443.7590       | 722.3832         | 481.9245        |
|         | 975.2615         | 488.1344         | 325.7587        | 8  | E      | 12 | 1328.7321       | <b>664.8697</b>  | 443.5822        |
|         | 1089.3044        | 545.1559         | 363.7730        | 9  | N      | 11 | 1199.6895       | <b>600.3484</b>  | 400.5680        |
|         | <b>1226.3634</b> | <b>613.6853</b>  | 409.4593        | 10 | H      | 10 | 1085.6466       | <b>543.3269</b>  | 362.5537        |
|         | 1323.4161        | <b>662.2117</b>  | 441.8102        | 11 | P      | 9  | <b>948.5877</b> | <b>474.7975</b>  | 316.8674        |
|         | 1436.5002        | 718.7537         | 479.5049        | 12 | L      | 8  | <b>851.5349</b> | 426.2711         | 284.5165        |
|         | 1533.5529        | 767.2801         | 511.8558        | 13 | P      | 7  | <b>738.4508</b> | <b>369.7291</b>  | 246.8218        |
|         | 1630.6057        | 815.8065         | <b>544.2068</b> | 14 | P      | 6  | <b>641.3981</b> | 321.2027         | 214.4709        |
|         | 1743.6898        | <b>872.3485</b>  | 581.9014        | 15 | L      | 5  | <b>544.3453</b> | 272.6763         | 182.1200        |
|         | 1857.7327        | <b>929.3700</b>  | <b>619.9157</b> | 16 | N      | 4  | 431.2612        | 216.1343         | 144.4253        |
|         | 1956.8011        | <b>978.9042</b>  | <b>652.9386</b> | 17 | V      | 3  | 317.2183        | 159.1128         | 106.4110        |
|         | 2027.8382        | <b>1014.4227</b> | <b>676.6176</b> | 18 | A      | 2  | 218.1499        | 109.5786         | 73.3882         |
|         |                  |                  |                 | 19 | K      | 1  | 147.1128        | 74.0600          | 49.7091         |

# Annotated spectra from Saleem et. al. 2009

R.FENNITAHS<sub>167</sub>S<sub>167</sub>R.R/2

0.9408

1e+04

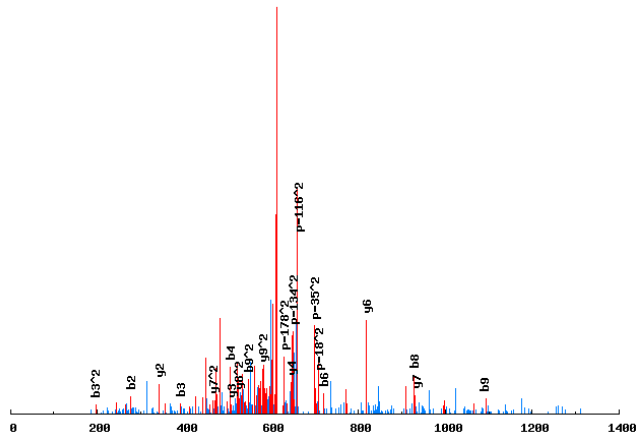

| Library | b <sup>1+</sup> | b <sup>2+</sup> | #  | AA     | #  | y <sup>1+</sup> | y <sup>2+</sup> |
|---------|-----------------|-----------------|----|--------|----|-----------------|-----------------|
|         | 148.0757        | 74.5415         | 1  | F      | 11 |                 |                 |
|         | 277.1183        | 139.0628        | 2  | E      | 10 | 1288.4719       | 644.7396        |
|         | 391.1612        | 196.0842        | 3  | N      | 9  | 1159.4293       | 580.2183        |
|         | 505.2041        | 253.1057        | 4  | N      | 8  | 1045.3864       | 523.1968        |
|         | 618.2882        | 309.6477        | 5  | I      | 7  | 931.3434        | 466.1754        |
|         | 719.3359        | 360.1716        | 6  | T      | 6  | 818.2594        | 409.6333        |
|         | 790.3730        | 395.6901        | 7  | A      | 5  | 717.2117        | 359.1095        |
|         | 927.4319        | 464.2196        | 8  | H      | 4  | 646.1746        | 323.5909        |
|         | 1094.4303       | 547.7188        | 9  | S[167] | 3  | 509.1157        | 255.0615        |
|         | 1261.4286       | 631.2180        | 10 | S[167] | 2  | 342.1173        | 171.5623        |
|         |                 |                 | 11 | R      | 1  | 175.1190        | 88.0631         |

# Annotated spectra from Saleem et. al. 2009

R.FENS<sub>167</sub>QSNLSS<sub>167</sub>HR<sub>166</sub>A/2

0.8673

1e+04

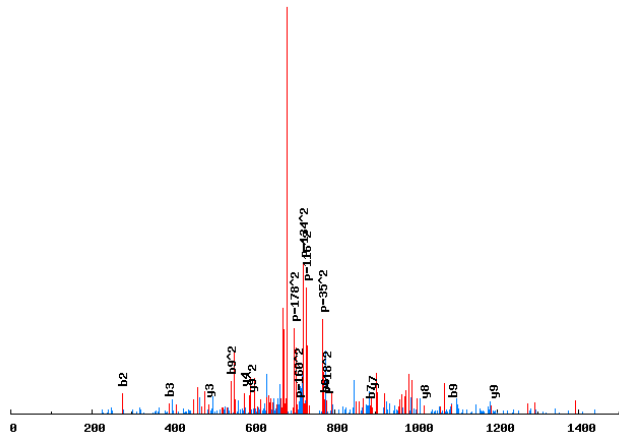

| Library | b <sup>1+</sup>  | b <sup>2+</sup> | #  | AA     | #  | y <sup>1+</sup>  | y <sup>2+</sup> |
|---------|------------------|-----------------|----|--------|----|------------------|-----------------|
|         | 148.0757         | 74.5415         | 1  | F      | 12 |                  |                 |
|         | <b>277.1183</b>  | 139.0628        | 2  | E      | 11 | 1428.5180        | 714.7626        |
|         | <b>391.1612</b>  | 196.0842        | 3  | N      | 10 | 1299.4754        | 650.2413        |
|         | 558.1596         | 279.5834        | 4  | S[167] | 9  | <b>1185.4325</b> | <b>593.2199</b> |
|         | 686.2182         | 343.6127        | 5  | Q      | 8  | <b>1018.4341</b> | 509.7207        |
|         | <b>773.2502</b>  | 387.1287        | 6  | S      | 7  | <b>890.3755</b>  | 445.6914        |
|         | <b>887.2931</b>  | 444.1502        | 7  | N      | 6  | 803.3435         | 402.1754        |
|         | 1000.3772        | 500.6922        | 8  | L      | 5  | 689.3006         | 345.1539        |
|         | <b>1087.4092</b> | <b>544.2082</b> | 9  | S      | 4  | <b>576.2165</b>  | 288.6119        |
|         | 1254.4076        | 627.7074        | 10 | S[167] | 3  | <b>489.1845</b>  | 245.0959        |
|         | 1391.4665        | 696.2369        | 11 | H      | 2  | 322.1861         | 161.5967        |
|         |                  |                 | 12 | R[166] | 1  | 185.1272         | 93.0672         |

# Annotated spectra from Saleem et. al. 2009

K.FFDSPSS<sub>167</sub>FVS<sub>167</sub>NAK.G/2

0.9965

1e+04

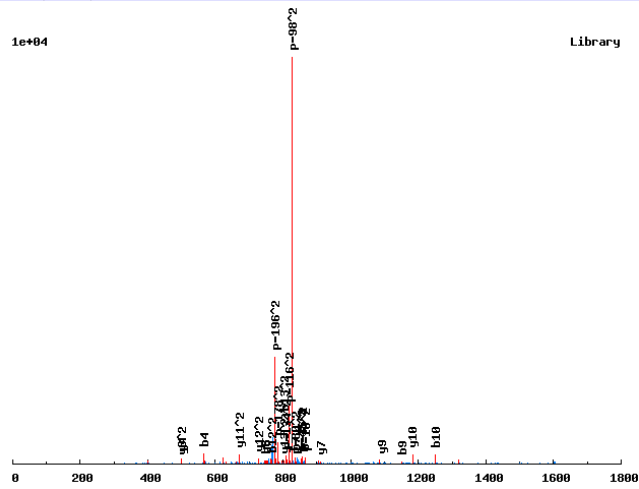

| Library | b <sup>1+</sup> | b <sup>2+</sup> | #  | AA     | #  | y <sup>1+</sup> | y <sup>2+</sup> |
|---------|-----------------|-----------------|----|--------|----|-----------------|-----------------|
|         | 148.0757        | 74.5415         | 1  | F      | 14 |                 |                 |
|         | 295.1441        | 148.0757        | 2  | F      | 13 | 1601.6397       | 801.3235        |
|         | 410.1710        | 205.5892        | 3  | D      | 12 | 1454.5713       | 727.7893        |
|         | 566.2722        | 283.6397        | 4  | R      | 11 | 1339.5443       | 670.2758        |
|         | 663.3249        | 332.1661        | 5  | P      | 10 | 1183.4432       | 592.2252        |
|         | 750.3569        | 375.6821        | 6  | S      | 9  | 1086.3904       | 543.6989        |
|         | 837.3890        | 419.1981        | 7  | S      | 8  | 999.3584        | 500.1828        |
|         | 1004.3873       | 502.6973        | 8  | S[167] | 7  | 912.3264        | 456.6668        |
|         | 1151.4557       | 576.2315        | 9  | F      | 6  | 745.3280        | 373.1677        |
|         | 1250.5242       | 625.7657        | 10 | V      | 5  | 598.2596        | 299.6334        |
|         | 1417.5225       | 709.2649        | 11 | S[167] | 4  | 499.1912        | 250.0992        |
|         | 1531.5654       | 766.2864        | 12 | N      | 3  | 332.1928        | 166.6001        |
|         | 1602.6026       | 801.8049        | 13 | A      | 2  | 218.1499        | 109.5786        |
|         |                 |                 | 14 | K      | 1  | 147.1128        | 74.0600         |

# Annotated spectra from Saleem et. al. 2009

R.FFS<sub>167</sub>PSSNIPTDR.I/2

0.9414

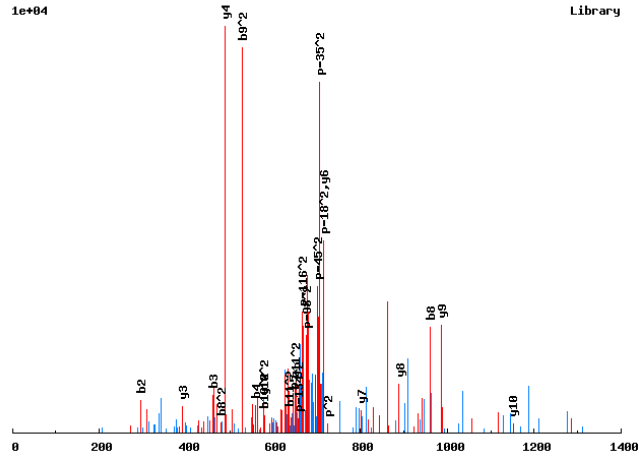

| Library | b <sup>1+</sup> | b <sup>2+</sup> | #  | AA     | #  | y <sup>1+</sup> | y <sup>2+</sup> |
|---------|-----------------|-----------------|----|--------|----|-----------------|-----------------|
|         | 148.0757        | 74.5415         | 1  | F      | 12 |                 |                 |
|         | 295.1441        | 148.0757        | 2  | F      | 11 | 1300.5569       | 650.7821        |
|         | 462.1425        | 231.5749        | 3  | S[167] | 10 | 1153.4885       | 577.2479        |
|         | 559.1952        | 280.1013        | 4  | P      | 9  | 986.4901        | 493.7487        |
|         | 646.2273        | 323.6173        | 5  | S      | 8  | 889.4374        | 445.2223        |
|         | 733.2593        | 367.1333        | 6  | S      | 7  | 802.4054        | 401.7063        |
|         | 847.3022        | 424.1547        | 7  | N      | 6  | 715.3733        | 358.1903        |
|         | 960.3863        | 480.6968        | 8  | I      | 5  | 601.3304        | 301.1688        |
|         | 1057.4390       | 529.2232        | 9  | P      | 4  | 488.2463        | 244.6268        |
|         | 1158.4867       | 579.7470        | 10 | T      | 3  | 391.1936        | 196.1004        |
|         | 1273.5137       | 637.2605        | 11 | D      | 2  | 290.1459        | 145.5766        |
|         |                 |                 | 12 | R      | 1  | 175.1190        | 88.0631         |

# Annotated spectra from Saleem et. al. 2009

R.FFS<sub>167</sub>PS<sub>167</sub>SNIPDR.I/2

0.9781

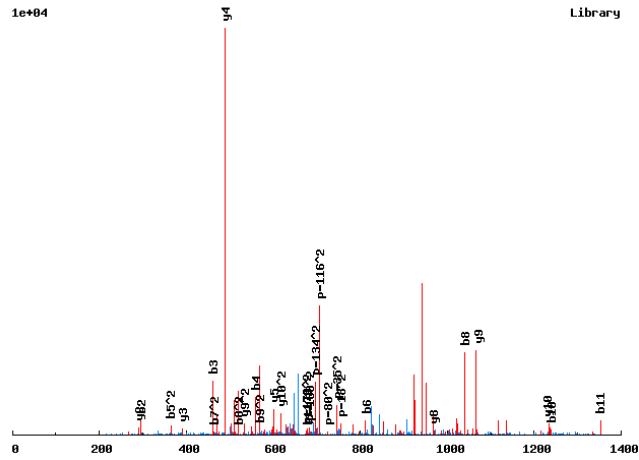

| Library | b <sup>1+</sup> | b <sup>2+</sup> | #  | AA     | #  | y <sup>1+</sup> | y <sup>2+</sup> |
|---------|-----------------|-----------------|----|--------|----|-----------------|-----------------|
|         | 148.0757        | 74.5415         | 1  | F      | 12 |                 |                 |
|         | 295.1441        | 148.0757        | 2  | F      | 11 | 1380.5232       | 690.7653        |
|         | 462.1425        | 231.5749        | 3  | S[167] | 10 | 1233.4548       | 617.2311        |
|         | 559.1952        | 280.1013        | 4  | P      | 9  | 1066.4565       | 533.7319        |
|         | 726.1936        | 363.6004        | 5  | S[167] | 8  | 969.4037        | 485.2055        |
|         | 813.2256        | 407.1164        | 6  | S      | 7  | 802.4054        | 401.7063        |
|         | 927.2685        | 464.1379        | 7  | N      | 6  | 715.3733        | 358.1903        |
|         | 1040.3526       | 520.6799        | 8  | I      | 5  | 601.3304        | 301.1688        |
|         | 1137.4054       | 569.2063        | 9  | P      | 4  | 488.2463        | 244.6268        |
|         | 1238.4530       | 619.7302        | 10 | T      | 3  | 391.1936        | 196.1004        |
|         | 1353.4800       | 677.2436        | 11 | D      | 2  | 290.1459        | 145.5766        |
|         |                 |                 | 12 | R      | 1  | 175.1190        | 88.0631         |

# Annotated spectra from Saleem et. al. 2009

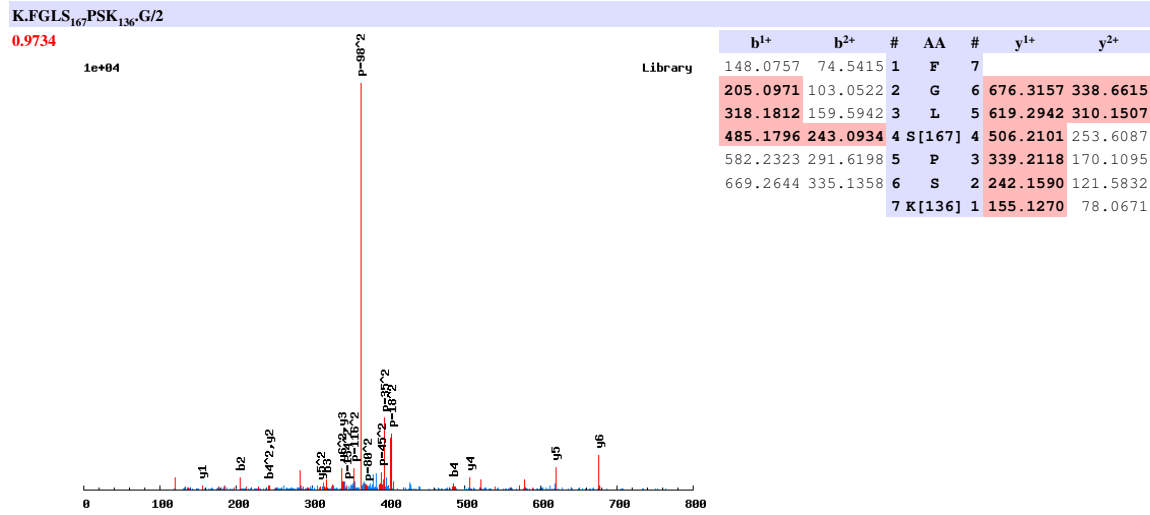



# Annotated spectra from Saleem et. al. 2009

R.FGS<sub>167</sub>DT<sub>181</sub>DDDDIDLK<sub>136</sub>PVEGGK<sub>136</sub>DPDNQLPNSK<sub>136</sub>I/3

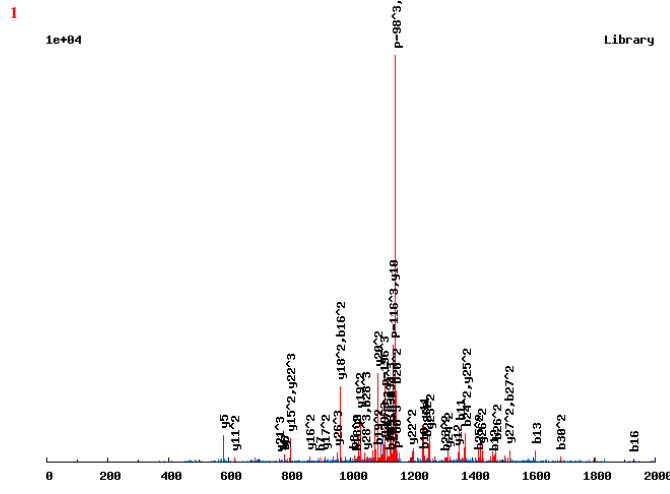

| Library | b <sup>1+</sup>  | b <sup>2+</sup>  | b <sup>3+</sup>  | #  | AA     | #  | y <sup>1+</sup>  | y <sup>2+</sup>  | y <sup>3+</sup>  |
|---------|------------------|------------------|------------------|----|--------|----|------------------|------------------|------------------|
|         | 148.0757         | 74.5415          | 50.0301          | 1  | F      | 31 |                  |                  |                  |
|         | 205.0971         | 103.0522         | 69.0372          | 2  | G      | 30 | 3384.4101        | 1692.7087        | <b>1128.8082</b> |
|         | 372.0955         | 186.5514         | 124.7034         | 3  | S[167] | 29 | 3327.3887        | 1664.1980        | <b>1109.8011</b> |
|         | 487.1225         | 244.0649         | 163.0457         | 4  | D      | 28 | 3160.3903        | 1580.6988        | <b>1054.1350</b> |
|         | 668.1365         | 334.5719         | 223.3837         | 5  | T[181] | 27 | 3045.3634        | <b>1523.1853</b> | 1015.7926        |
|         | <b>783.1634</b>  | 392.0853         | 261.7260         | 6  | D      | 26 | 2864.3494        | <b>1432.6783</b> | <b>955.4546</b>  |
|         | <b>898.1903</b>  | 449.5988         | 300.0683         | 7  | D      | 25 | 2749.3224        | <b>1375.1649</b> | 917.1123         |
|         | <b>1013.2173</b> | 507.1123         | 338.4106         | 8  | D      | 24 | 2634.2955        | <b>1317.6514</b> | 878.7700         |
|         | <b>1128.2442</b> | 564.6258         | 376.7529         | 9  | D      | 23 | 2519.2685        | <b>1260.1379</b> | 840.4277         |
|         | <b>1241.3283</b> | 621.1678         | 414.4476         | 10 | I      | 22 | 2404.2416        | <b>1202.6244</b> | <b>802.0854</b>  |
|         | <b>1356.3552</b> | 678.6813         | 452.7899         | 11 | D      | 21 | 2291.1575        | <b>1146.0824</b> | <b>764.3907</b>  |
|         | <b>1469.4393</b> | 735.2233         | 490.4846         | 12 | L      | 20 | 2176.1306        | <b>1088.5689</b> | 726.0484         |
|         | <b>1605.5484</b> | 803.2779         | 535.8543         | 13 | K[136] | 19 | 2063.0465        | <b>1032.0269</b> | 688.3537         |
|         | 1702.6012        | 851.8042         | 568.2053         | 14 | P      | 18 | 1926.9374        | <b>963.9723</b>  | 642.9840         |
|         | 1801.6696        | 901.3384         | 601.2281         | 15 | V      | 17 | 1829.8846        | <b>915.4460</b>  | 610.6331         |
|         | <b>1930.7122</b> | <b>965.8597</b>  | 644.2423         | 16 | E      | 16 | 1730.8162        | <b>865.9117</b>  | 577.6103         |
|         | 1987.7337        | 994.3705         | 663.2494         | 17 | G      | 15 | 1601.7736        | <b>801.3905</b>  | 534.5961         |
|         | 2044.7551        | <b>1022.8812</b> | 682.2566         | 18 | G      | 14 | 1544.7522        | 772.8797         | 515.5889         |
|         | 2180.8643        | <b>1090.9358</b> | 727.6263         | 19 | K[136] | 13 | 1487.7307        | 744.3690         | 496.5818         |
|         | 2295.8912        | <b>1148.4492</b> | 765.9686         | 20 | D      | 12 | <b>1351.6215</b> | 676.3144         | 451.2120         |
|         | 2392.9440        | 1196.9756        | 798.3195         | 21 | P      | 11 | <b>1236.5946</b> | <b>618.8009</b>  | 412.8697         |
|         | 2507.9709        | <b>1254.4891</b> | 836.6618         | 22 | D      | 10 | <b>1139.5418</b> | 570.2746         | 380.5188         |
|         | 2622.0138        | <b>1311.5106</b> | 874.6761         | 23 | N      | 9  | <b>1024.5149</b> | 512.7611         | 342.1765         |
|         | 2750.0724        | <b>1375.5399</b> | 917.3623         | 24 | Q      | 8  | 910.4720         | 455.7396         | 304.1622         |
|         | 2837.1045        | <b>1419.0559</b> | 946.3730         | 25 | S      | 7  | <b>782.4134</b>  | 391.7103         | 261.4760         |
|         | 2950.1885        | <b>1475.5979</b> | 984.0677         | 26 | L      | 6  | 695.3814         | 348.1943         | 232.4653         |
|         | 3047.2413        | <b>1524.1243</b> | 1016.4186        | 27 | P      | 5  | <b>582.2973</b>  | 291.6523         | 194.7706         |
|         | 3161.2842        | 1581.1457        | <b>1054.4329</b> | 28 | N      | 4  | 485.2445         | 243.1259         | 162.4197         |
|         | 3248.3162        | 1624.6618        | 1083.4436        | 29 | S      | 3  | 371.2016         | 186.1044         | 124.4054         |
|         | 3377.3588        | <b>1689.1831</b> | <b>1126.4578</b> | 30 | E      | 2  | 284.1696         | 142.5884         | 95.3947          |
|         |                  |                  |                  | 31 | K[136] | 1  | 155.1270         | 78.0671          | 52.3805          |

# Annotated spectra from Saleem et. al. 2009

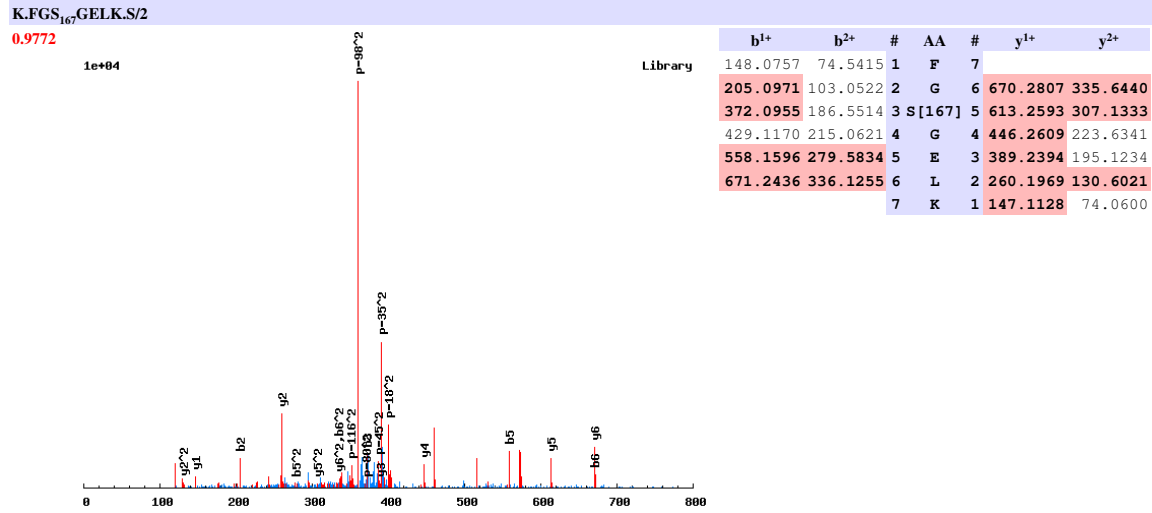

# Annotated spectra from Saleem et. al. 2009

R.FGS<sub>167</sub>GNS<sub>167</sub>FSSLDKPIPQSR.K/2

0.9987

1e+04

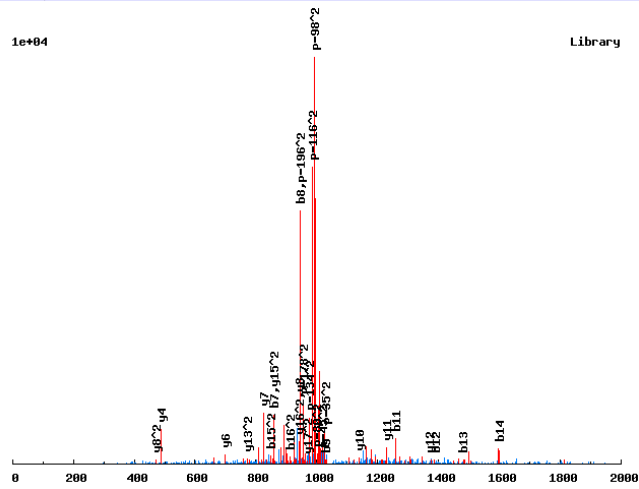

| Library | b <sup>1+</sup> | b <sup>2+</sup> | #  | AA     | #  | y <sup>1+</sup> | y <sup>2+</sup> |
|---------|-----------------|-----------------|----|--------|----|-----------------|-----------------|
|         | 148.0757        | 74.5415         | 1  | F      | 18 |                 |                 |
|         | 205.0971        | 103.0522        | 2  | G      | 17 | 1936.8201       | 968.9137        |
|         | 372.0955        | 186.5514        | 3  | S[167] | 16 | 1879.7987       | 940.4030        |
|         | 429.1170        | 215.0621        | 4  | G      | 15 | 1712.8003       | 856.9038        |
|         | 543.1599        | 272.0836        | 5  | N      | 14 | 1655.7789       | 828.3931        |
|         | 710.1583        | 355.5828        | 6  | S[167] | 13 | 1541.7359       | 771.3716        |
|         | 857.2267        | 429.1170        | 7  | F      | 12 | 1374.7376       | 687.8724        |
|         | 944.2587        | 472.6330        | 8  | S      | 11 | 1227.6692       | 614.3382        |
|         | 1031.2907       | 516.1490        | 9  | S      | 10 | 1140.6371       | 570.8222        |
|         | 1144.3748       | 572.6910        | 10 | L      | 9  | 1053.6051       | 527.3062        |
|         | 1259.4017       | 630.2045        | 11 | D      | 8  | 940.5210        | 470.7642        |
|         | 1387.4967       | 694.2520        | 12 | K      | 7  | 825.4941        | 413.2507        |
|         | 1484.5495       | 742.7784        | 13 | P      | 6  | 697.3991        | 349.2032        |
|         | 1597.6335       | 799.3204        | 14 | I      | 5  | 600.3464        | 300.6768        |
|         | 1694.6863       | 847.8468        | 15 | P      | 4  | 487.2623        | 244.1348        |
|         | 1822.7449       | 911.8761        | 16 | Q      | 3  | 390.2096        | 195.6084        |
|         | 1909.7769       | 955.3921        | 17 | S      | 2  | 262.1510        | 131.5791        |
|         |                 |                 | 18 | R      | 1  | 175.1190        | 88.0631         |

# Annotated spectra from Saleem et. al. 2009

R.FGSLNDQGTAGLS<sub>167</sub>SHGGS<sub>167</sub>FAAQNR.I/3

0.9406

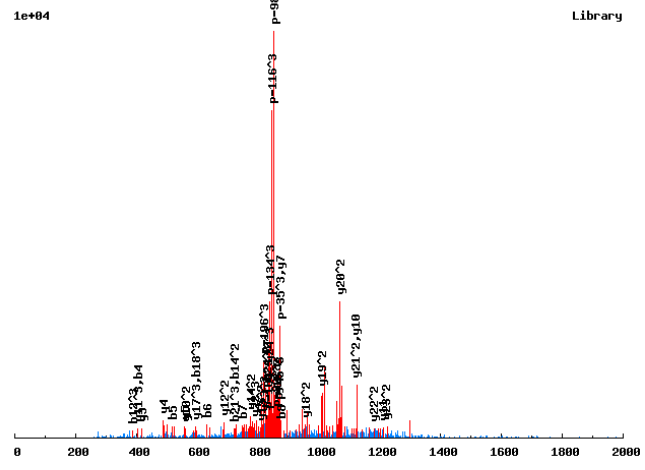

| Library | b <sup>1+</sup> | b <sup>2+</sup> | b <sup>3+</sup> | #  | AA     | #  | y <sup>1+</sup> | y <sup>2+</sup> | y <sup>3+</sup> |
|---------|-----------------|-----------------|-----------------|----|--------|----|-----------------|-----------------|-----------------|
|         | 148.0757        | 74.5415         | 50.0301         | 1  | F      | 25 |                 |                 |                 |
|         | 205.0971        | 103.0522        | 69.0372         | 2  | G      | 24 | 2505.0555       | 1253.0314       | 835.6900        |
|         | 292.1292        | 146.5682        | 98.0479         | 3  | S      | 23 | 2448.0340       | 1224.5207       | 816.6829        |
|         | 405.2132        | 203.1103        | 135.7426        | 4  | L      | 22 | 2361.0020       | 1181.0046       | 787.6722        |
|         | 518.2973        | 259.6523        | 173.4373        | 5  | I      | 21 | 2247.9180       | 1124.4626       | 749.9775        |
|         | 632.3402        | 316.6738        | 211.4516        | 6  | N      | 20 | 2134.8339       | 1067.9206       | 712.2828        |
|         | 747.3672        | 374.1872        | 249.7939        | 7  | D      | 19 | 2020.7910       | 1010.8991       | 674.2685        |
|         | 875.4257        | 438.2165        | 292.4801        | 8  | Q      | 18 | 1905.7640       | 953.3857        | 635.9262        |
|         | 932.4472        | 466.7272        | 311.4873        | 9  | G      | 17 | 1777.7054       | 889.3564        | 593.2400        |
|         | 1033.4949       | 517.2511        | 345.1698        | 10 | T      | 16 | 1720.6840       | 860.8456        | 574.2328        |
|         | 1104.5320       | 552.7696        | 368.8489        | 11 | A      | 15 | 1619.6363       | 810.3218        | 540.5503        |
|         | 1161.5535       | 581.2804        | 387.8560        | 12 | G      | 14 | 1548.5992       | 774.8032        | 516.8713        |
|         | 1274.6375       | 637.8224        | 425.5507        | 13 | L      | 13 | 1491.5777       | 746.2925        | 497.8641        |
|         | 1441.6359       | 721.3216        | 481.2168        | 14 | S[167] | 12 | 1378.4937       | 689.7505        | 460.1694        |
|         | 1528.6679       | 764.8376        | 510.2275        | 15 | S      | 11 | 1211.4953       | 606.2513        | 404.5033        |
|         | 1665.7268       | 833.3671        | 555.9138        | 16 | H      | 10 | 1124.4633       | 562.7353        | 375.4926        |
|         | 1722.7483       | 861.8778        | 574.9209        | 17 | G      | 9  | 987.4044        | 494.2058        | 329.8063        |
|         | 1779.7697       | 890.3885        | 593.9281        | 18 | G      | 8  | 930.3829        | 465.6951        | 310.7992        |
|         | 1946.7681       | 973.8877        | 649.5942        | 19 | S[167] | 7  | 873.3615        | 437.1844        | 291.7920        |
|         | 2093.8365       | 1047.4219       | 698.6170        | 20 | F      | 6  | 706.3631        | 353.6852        | 236.1259        |
|         | 2164.8736       | 1082.9405       | 722.2961        | 21 | A      | 5  | 559.2947        | 280.1510        | 187.1031        |
|         | 2235.9107       | 1118.4590       | 745.9751        | 22 | A      | 4  | 488.2576        | 244.6324        | 163.4240        |
|         | 2363.9693       | 1182.4883       | 788.6613        | 23 | Q      | 3  | 417.2205        | 209.1139        | 139.7450        |
|         | 2478.0122       | 1239.5098       | 826.6756        | 24 | N      | 2  | 289.1619        | 145.0846        | 97.0588         |
|         |                 |                 |                 | 25 | R      | 1  | 175.1190        | 88.0631         | 59.0445         |

# Annotated spectra from Saleem et. al. 2009

K.FGS<sub>167</sub>PSAS<sub>167</sub>DIESPNPK<sub>136</sub>L/2

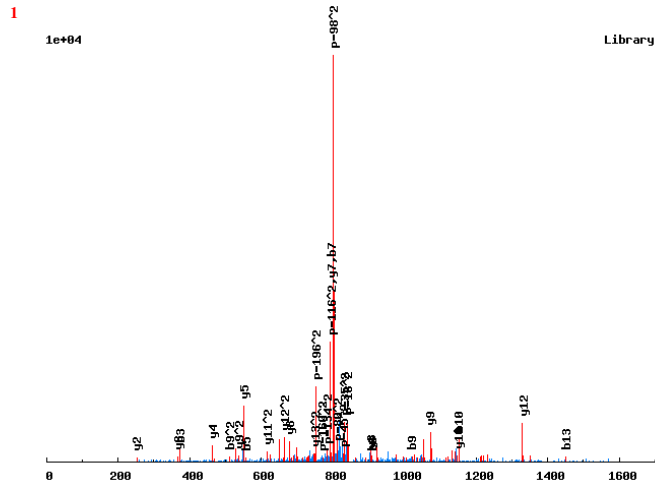

| Library | b <sup>1+</sup>  | b <sup>2+</sup> | #  | AA     | #  | y <sup>1+</sup>  | y <sup>2+</sup> |
|---------|------------------|-----------------|----|--------|----|------------------|-----------------|
|         | 148.0757         | 74.5415         | 1  | F      | 15 |                  |                 |
|         | 205.0971         | 103.0522        | 2  | G      | 14 | 1553.6012        | 777.3042        |
|         | <b>372.0955</b>  | 186.5514        | 3  | S[167] | 13 | 1496.5797        | <b>748.7935</b> |
|         | 469.1483         | 235.0778        | 4  | P      | 12 | <b>1329.5813</b> | <b>665.2943</b> |
|         | <b>556.1803</b>  | 278.5938        | 5  | S      | 11 | 1232.5286        | <b>616.7679</b> |
|         | 627.2174         | 314.1123        | 6  | A      | 10 | <b>1145.4965</b> | 573.2519        |
|         | <b>794.2158</b>  | 397.6115        | 7  | S[167] | 9  | <b>1074.4594</b> | <b>537.7334</b> |
|         | <b>909.2427</b>  | 455.1250        | 8  | D      | 8  | <b>907.4611</b>  | 454.2342        |
|         | <b>1022.3268</b> | <b>511.6670</b> | 9  | I      | 7  | <b>792.4341</b>  | 396.7207        |
|         | <b>1151.3694</b> | 576.1883        | 10 | E      | 6  | <b>679.3501</b>  | 340.1787        |
|         | 1238.4014        | 619.7043        | 11 | S      | 5  | <b>550.3075</b>  | 275.6574        |
|         | 1335.4542        | 668.2307        | 12 | P      | 4  | <b>463.2754</b>  | 232.1414        |
|         | <b>1449.4971</b> | 725.2522        | 13 | N      | 3  | <b>366.2227</b>  | 183.6150        |
|         | 1546.5498        | 773.7786        | 14 | P      | 2  | <b>252.1798</b>  | 126.5935        |
|         |                  |                 | 15 | K[136] | 1  | 155.1270         | 78.0671         |

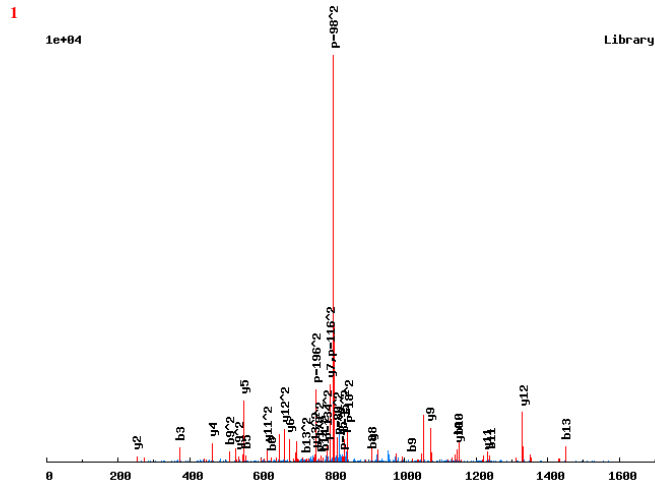

| Library | b <sup>1+</sup>  | b <sup>2+</sup> | #  | AA     | #  | y <sup>1+</sup>  | y <sup>2+</sup> |
|---------|------------------|-----------------|----|--------|----|------------------|-----------------|
|         | 148.0757         | 74.5415         | 1  | F      | 15 |                  |                 |
|         | 205.0971         | 103.0522        | 2  | G      | 14 | 1553.6012        | 777.3042        |
|         | <b>372.0955</b>  | 186.5514        | 3  | S[167] | 13 | 1496.5797        | <b>748.7935</b> |
|         | 469.1483         | 235.0778        | 4  | P      | 12 | <b>1329.5813</b> | <b>665.2943</b> |
|         | <b>556.1803</b>  | 278.5938        | 5  | S      | 11 | 1232.5286        | <b>616.7679</b> |
|         | <b>627.2174</b>  | 314.1123        | 6  | A      | 10 | <b>1145.4965</b> | 573.2519        |
|         | 794.2158         | 397.6115        | 7  | S[167] | 9  | <b>1074.4594</b> | <b>537.7334</b> |
|         | <b>909.2427</b>  | 455.1250        | 8  | D      | 8  | <b>907.4611</b>  | 454.2342        |
|         | <b>1022.3268</b> | <b>511.6670</b> | 9  | I      | 7  | <b>792.4341</b>  | 396.7207        |
|         | <b>1151.3694</b> | 576.1883        | 10 | E      | 6  | <b>679.3501</b>  | 340.1787        |
|         | <b>1238.4014</b> | 619.7043        | 11 | S      | 5  | <b>550.3075</b>  | 275.6574        |
|         | 1335.4542        | 668.2307        | 12 | P      | 4  | <b>463.2754</b>  | 232.1414        |
|         | <b>1449.4971</b> | <b>725.2522</b> | 13 | N      | 3  | 366.2227         | 183.6150        |
|         | 1546.5498        | <b>773.7786</b> | 14 | P      | 2  | <b>252.1798</b>  | 126.5935        |
|         |                  |                 | 15 | K[136] | 1  | 155.1270         | 78.0671         |

# Annotated spectra from Saleem et. al. 2009

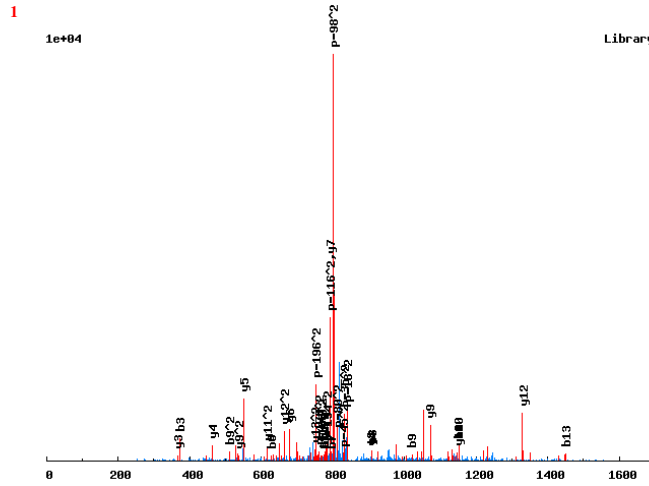

| Library | b <sup>1+</sup> | b <sup>2+</sup> | #  | AA      | #  | y <sup>1+</sup> | y <sup>2+</sup> |
|---------|-----------------|-----------------|----|---------|----|-----------------|-----------------|
|         | 148.0757        | 74.5415         | 1  | F       | 15 |                 |                 |
|         | 205.0971        | 103.0522        | 2  | G       | 14 | 1553.6012       | 777.3042        |
|         | 372.0955        | 186.5514        | 3  | S [167] | 13 | 1496.5797       | 748.7935        |
|         | 469.1483        | 235.0778        | 4  | P       | 12 | 1329.5813       | 665.2943        |
|         | 556.1803        | 278.5938        | 5  | S       | 11 | 1232.5286       | 616.7679        |
|         | 627.2174        | 314.1123        | 6  | A       | 10 | 1145.4965       | 573.2519        |
|         | 794.2158        | 397.6115        | 7  | S [167] | 9  | 1074.4594       | 537.7334        |
|         | 909.2427        | 455.1250        | 8  | D       | 8  | 907.4611        | 454.2342        |
|         | 1022.3268       | 511.6670        | 9  | I       | 7  | 792.4341        | 396.7207        |
|         | 1151.3694       | 576.1883        | 10 | E       | 6  | 679.3501        | 340.1787        |
|         | 1238.4014       | 619.7043        | 11 | S       | 5  | 550.3075        | 275.6574        |
|         | 1335.4542       | 668.2307        | 12 | P       | 4  | 463.2754        | 232.1414        |
|         | 1449.4971       | 725.2522        | 13 | N       | 3  | 366.2227        | 183.6150        |
|         | 1546.5498       | 773.7786        | 14 | P       | 2  | 252.1798        | 126.5935        |
|         |                 |                 | 15 | K [136] | 1  | 155.1270        | 78.0671         |

### Annotated spectra from Saleem et. al. 2009

K.FHS<sub>167</sub>PSK<sub>136</sub>ESFDR<sub>166</sub>T/3

0.9935

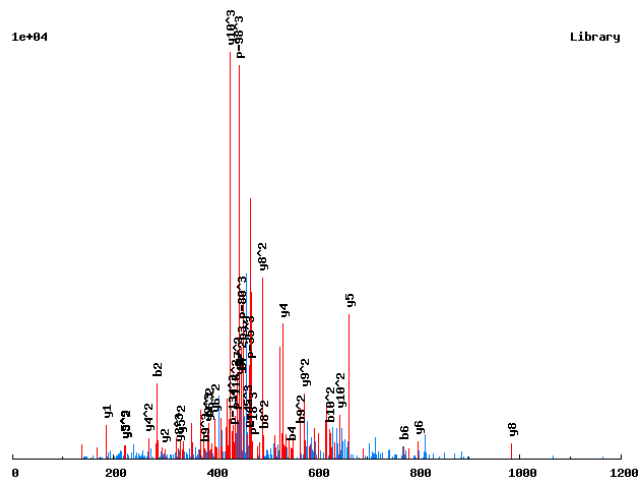

| Library | b <sup>1+</sup> | b <sup>2+</sup> | b <sup>3+</sup> | #  | AA     | #  | y <sup>1+</sup> | y <sup>2+</sup> | y <sup>3+</sup> |
|---------|-----------------|-----------------|-----------------|----|--------|----|-----------------|-----------------|-----------------|
|         | 148.0757        | 74.5415         | 50.0301         | 1  | F      | 11 |                 |                 |                 |
|         | <b>285.1346</b> | 143.0709        | 95.7164         | 2  | H      | 10 | 1287.5484       | <b>644.2778</b> | <b>429.8543</b> |
|         | <b>452.1330</b> | 226.5701        | 151.3825        | 3  | S[167] | 9  | 1150.4895       | <b>575.7484</b> | <b>384.1680</b> |
|         | <b>549.1857</b> | 275.0965        | 183.7334        | 4  | P      | 8  | <b>983.4911</b> | <b>492.2492</b> | <b>328.5019</b> |
|         | 636.2178        | 318.6125        | 212.7441        | 5  | S      | 7  | 886.4384        | <b>443.7228</b> | 296.1510        |
|         | <b>772.3269</b> | <b>386.6671</b> | 258.1138        | 6  | K[136] | 6  | <b>799.4063</b> | <b>400.2068</b> | 267.1403        |
|         | 901.3695        | <b>451.1884</b> | 301.1280        | 7  | E      | 5  | <b>663.2972</b> | <b>332.1522</b> | <b>221.7706</b> |
|         | 988.4015        | <b>494.7044</b> | 330.1387        | 8  | S      | 4  | <b>534.2546</b> | <b>267.6309</b> | 178.7564        |
|         | 1135.4699       | <b>568.2386</b> | <b>379.1615</b> | 9  | F      | 3  | <b>447.2226</b> | <b>224.1149</b> | 149.7457        |
|         | 1250.4969       | <b>625.7521</b> | 417.5038        | 10 | D      | 2  | <b>300.1542</b> | 150.5807        | 100.7229        |
|         |                 |                 |                 | 11 | R[166] | 1  | <b>185.1272</b> | 93.0672         | 62.3806         |

# Annotated spectra from Saleem et. al. 2009

K.FIEATK<sub>136</sub>ES<sub>167</sub>DEDS<sub>167</sub>DADEFFDAEEAASDK<sub>136</sub>K<sub>136</sub>A/3

0.9996

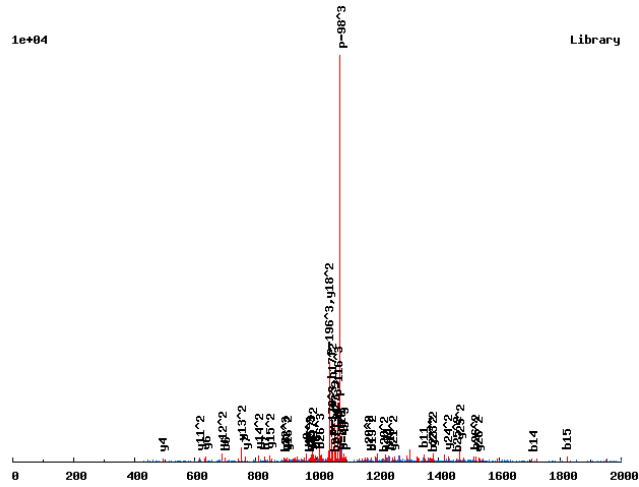

| Library | b <sup>1+</sup> | b <sup>2+</sup> | b <sup>3+</sup> | #  | AA     | #  | y <sup>1+</sup> | y <sup>2+</sup> | y <sup>3+</sup> |
|---------|-----------------|-----------------|-----------------|----|--------|----|-----------------|-----------------|-----------------|
|         | 148.0757        | 74.5415         | 50.0301         | 1  | F      | 28 |                 |                 |                 |
|         | 261.1597        | 131.0835        | 87.7248         | 2  | I      | 27 | 3176.2454       | 1588.6263       | 1059.4200       |
|         | 390.2023        | 195.6048        | 130.7390        | 3  | E      | 26 | 3063.1613       | 1532.0843       | 1021.7253       |
|         | 461.2394        | 231.1234        | 154.4180        | 4  | A      | 25 | 2934.1187       | 1467.5630       | 978.7111        |
|         | 562.2871        | 281.6472        | 188.1006        | 5  | T      | 24 | 2863.0816       | 1432.0444       | 955.0321        |
|         | 698.3963        | 349.7018        | 233.4703        | 6  | K[136] | 23 | 2762.0339       | 1381.5206       | 921.3495        |
|         | 827.4389        | 414.2231        | 276.4845        | 7  | E      | 22 | 2625.9248       | 1313.4660       | 875.9798        |
|         | 994.4372        | 497.7223        | 332.1506        | 8  | S[167] | 21 | 2496.8822       | 1248.9447       | 832.9656        |
|         | 1109.4642       | 555.2357        | 370.4929        | 9  | D      | 20 | 2329.8838       | 1165.4455       | 777.2995        |
|         | 1238.5068       | 619.7570        | 413.5071        | 10 | E      | 19 | 2214.8569       | 1107.9321       | 738.9571        |
|         | 1353.5337       | 677.2705        | 451.8494        | 11 | D      | 18 | 2085.8143       | 1043.4108       | 695.9429        |
|         | 1520.5321       | 760.7697        | 507.5155        | 12 | S[167] | 17 | 1970.7873       | 985.8973        | 657.6006        |
|         | 1635.5590       | 818.2831        | 545.8579        | 13 | D      | 16 | 1803.7890       | 902.3981        | 601.9345        |
|         | 1706.5961       | 853.8017        | 569.5369        | 14 | A      | 15 | 1688.7620       | 844.8847        | 563.5922        |
|         | 1821.6231       | 911.3152        | 607.8792        | 15 | D      | 14 | 1617.7249       | 809.3661        | 539.9132        |
|         | 1950.6657       | 975.8365        | 650.8934        | 16 | E      | 13 | 1502.6980       | 751.8526        | 501.5708        |
|         | 2097.7341       | 1049.3707       | 699.9162        | 17 | F      | 12 | 1373.6554       | 687.3313        | 458.5567        |
|         | 2244.8025       | 1122.9049       | 748.9390        | 18 | F      | 11 | 1226.5870       | 613.7971        | 409.5338        |
|         | 2359.8294       | 1180.4183       | 787.2813        | 19 | D      | 10 | 1079.5186       | 540.2629        | 360.5110        |
|         | 2430.8665       | 1215.9369       | 810.9604        | 20 | A      | 9  | 964.4916        | 482.7495        | 322.1687        |
|         | 2559.9091       | 1280.4582       | 853.9746        | 21 | E      | 8  | 893.4545        | 447.2309        | 298.4897        |
|         | 2688.9517       | 1344.9795       | 896.9888        | 22 | E      | 7  | 764.4119        | 382.7096        | 255.4755        |
|         | 2759.9888       | 1380.4980       | 920.6678        | 23 | A      | 6  | 635.3693        | 318.1883        | 212.4613        |
|         | 2831.0259       | 1416.0166       | 944.3468        | 24 | A      | 5  | 564.3322        | 282.6698        | 188.7823        |
|         | 2918.0580       | 1459.5326       | 973.3575        | 25 | S      | 4  | 493.2951        | 247.1512        | 165.1032        |
|         | 3033.0849       | 1517.0461       | 1011.6998       | 26 | D      | 3  | 406.2631        | 203.6352        | 136.0926        |
|         | 3169.1941       | 1585.1007       | 1057.0695       | 27 | K[136] | 2  | 291.2362        | 146.1217        | 97.7502         |
|         |                 |                 |                 | 28 | K[136] | 1  | 155.1270        | 78.0671         | 52.3805         |



# Annotated spectra from Saleem et. al. 2009

R.FISR<sub>166</sub>LS<sub>167</sub>S<sub>167</sub>PEK<sub>136</sub>V/2

0.6764

1e+04

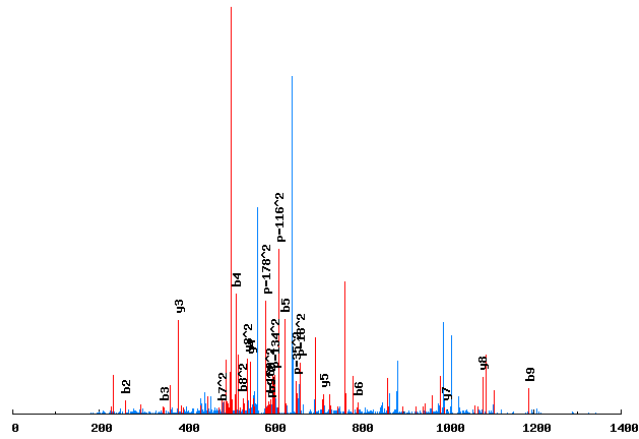

| Library | b <sup>1+</sup> | b <sup>2+</sup> | #  | AA     | #  | y <sup>1+</sup> | y <sup>2+</sup> |
|---------|-----------------|-----------------|----|--------|----|-----------------|-----------------|
|         | 148.0757        | 74.5415         | 1  | F      | 10 |                 |                 |
|         | 261.1597        | 131.0835        | 2  | I      | 9  | 1194.5286       | 597.7679        |
|         | 348.1918        | 174.5995        | 3  | S      | 8  | 1081.4445       | 541.2259        |
|         | 514.3012        | 257.6542        | 4  | R[166] | 7  | 994.4125        | 497.7099        |
|         | 627.3852        | 314.1962        | 5  | L      | 6  | 828.3031        | 414.6552        |
|         | 794.3836        | 397.6954        | 6  | S[167] | 5  | 715.2191        | 358.1132        |
|         | 961.3819        | 481.1946        | 7  | S[167] | 4  | 548.2207        | 274.6140        |
|         | 1058.4347       | 529.7210        | 8  | P      | 3  | 381.2223        | 191.1148        |
|         | 1187.4773       | 594.2423        | 9  | E      | 2  | 284.1696        | 142.5884        |
|         |                 |                 | 10 | K[136] | 1  | 155.1270        | 78.0671         |

# Annotated spectra from Saleem et. al. 2009

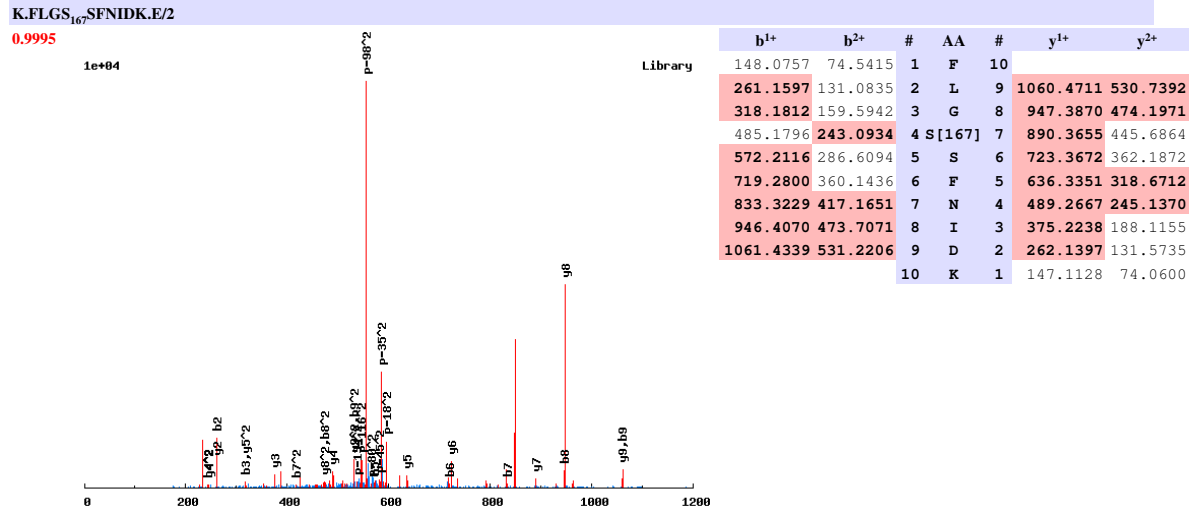

# Annotated spectra from Saleem et. al. 2009

R.FLNHS<sub>167</sub>DC<sub>160</sub>S<sub>167</sub>AINQQPAHESNLK.T/3

0.9993

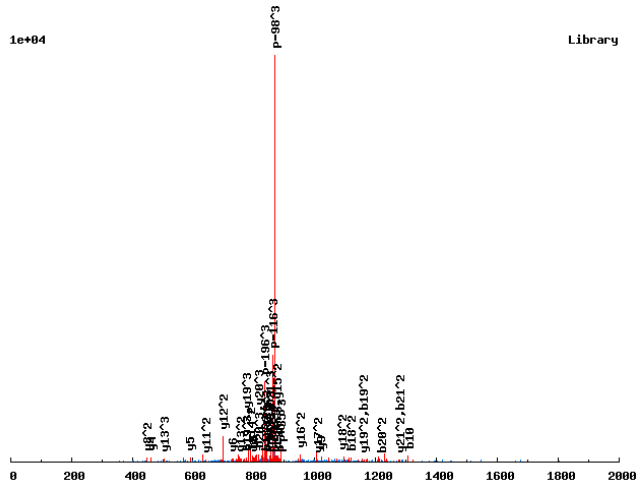

| Library | b <sup>1+</sup> | b <sup>2+</sup> | b <sup>3+</sup> | #  | AA     | #  | y <sup>1+</sup> | y <sup>2+</sup> | y <sup>3+</sup> |
|---------|-----------------|-----------------|-----------------|----|--------|----|-----------------|-----------------|-----------------|
|         | 148.0757        | 74.5415         | 50.0301         | 1  | F      | 22 |                 |                 |                 |
|         | 261.1597        | 131.0835        | 87.7248         | 2  | L      | 21 | 2551.0432       | 1276.0253       | 851.0193        |
|         | 375.2027        | 188.1050        | 125.7391        | 3  | N      | 20 | 2437.9592       | 1219.4832       | 813.3246        |
|         | 512.2616        | 256.6344        | 171.4254        | 4  | H      | 19 | 2323.9163       | 1162.4618       | 775.3103        |
|         | 679.2600        | 340.1336        | 227.0915        | 5  | S[167] | 18 | 2186.8573       | 1093.9323       | 729.6240        |
|         | 794.2869        | 397.6471        | 265.4338        | 6  | D      | 17 | 2019.8590       | 1010.4331       | 673.9578        |
|         | 954.3175        | 477.6624        | 318.7774        | 7  | C[160] | 16 | 1904.8320       | 952.9197        | 635.6155        |
|         | 1121.3159       | 561.1616        | 374.4435        | 8  | S[167] | 15 | 1744.8014       | 872.9043        | 582.2720        |
|         | 1192.3530       | 596.6801        | 398.1225        | 9  | A      | 14 | 1577.8030       | 789.4052        | 526.6059        |
|         | 1305.4371       | 653.2222        | 435.8172        | 10 | I      | 13 | 1506.7659       | 753.8866        | 502.9268        |
|         | 1419.4800       | 710.2436        | 473.8315        | 11 | N      | 12 | 1393.6819       | 697.3446        | 465.2321        |
|         | 1547.5386       | 774.2729        | 516.5177        | 12 | Q      | 11 | 1279.6389       | 640.3231        | 427.2178        |
|         | 1675.5972       | 838.3022        | 559.2039        | 13 | Q      | 10 | 1151.5803       | 576.2938        | 384.5316        |
|         | 1803.6557       | 902.3315        | 601.8901        | 14 | Q      | 9  | 1023.5218       | 512.2645        | 341.8454        |
|         | 1900.7085       | 950.8579        | 634.2410        | 15 | P      | 8  | 895.4632        | 448.2352        | 299.1593        |
|         | 1971.7456       | 986.3764        | 657.9201        | 16 | A      | 7  | 798.4104        | 399.7089        | 266.8083        |
|         | 2108.8045       | 1054.9059       | 703.6064        | 17 | H      | 6  | 727.3733        | 364.1903        | 243.1293        |
|         | 2237.8471       | 1119.4272       | 746.6206        | 18 | E      | 5  | 590.3144        | 295.6608        | 197.4430        |
|         | 2324.8791       | 1162.9432       | 775.6312        | 19 | S      | 4  | 461.2718        | 231.1395        | 154.4288        |
|         | 2438.9221       | 1219.9647       | 813.6455        | 20 | N      | 3  | 374.2398        | 187.6235        | 125.4181        |
|         | 2552.0061       | 1276.5067       | 851.3402        | 21 | L      | 2  | 260.1969        | 130.6021        | 87.4038         |
|         |                 |                 |                 | 22 | K      | 1  | 147.1128        | 74.0600         | 49.7091         |

Annotated spectra from Saleem et. al. 2009

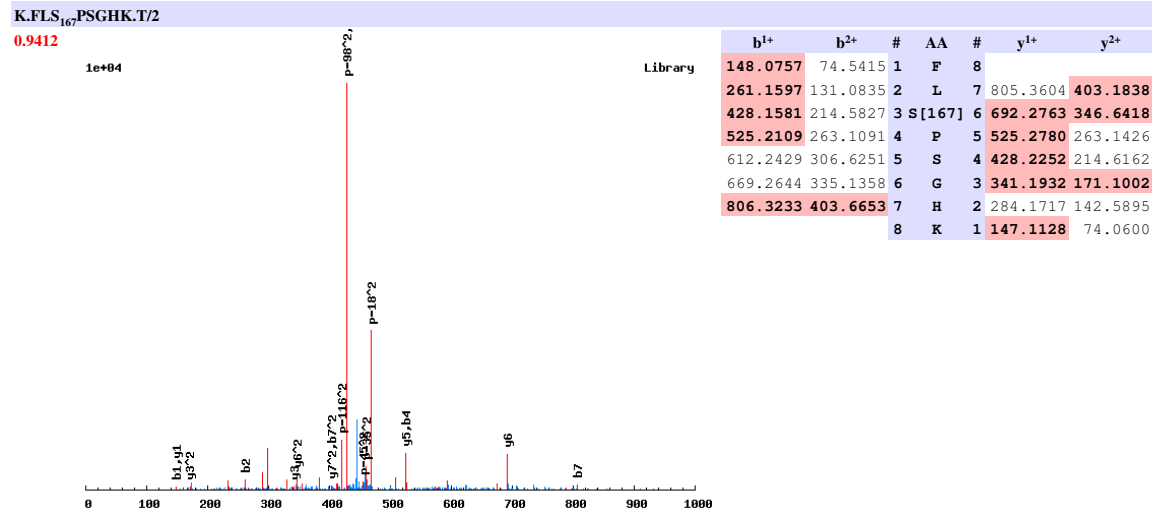

# Annotated spectra from Saleem et. al. 2009

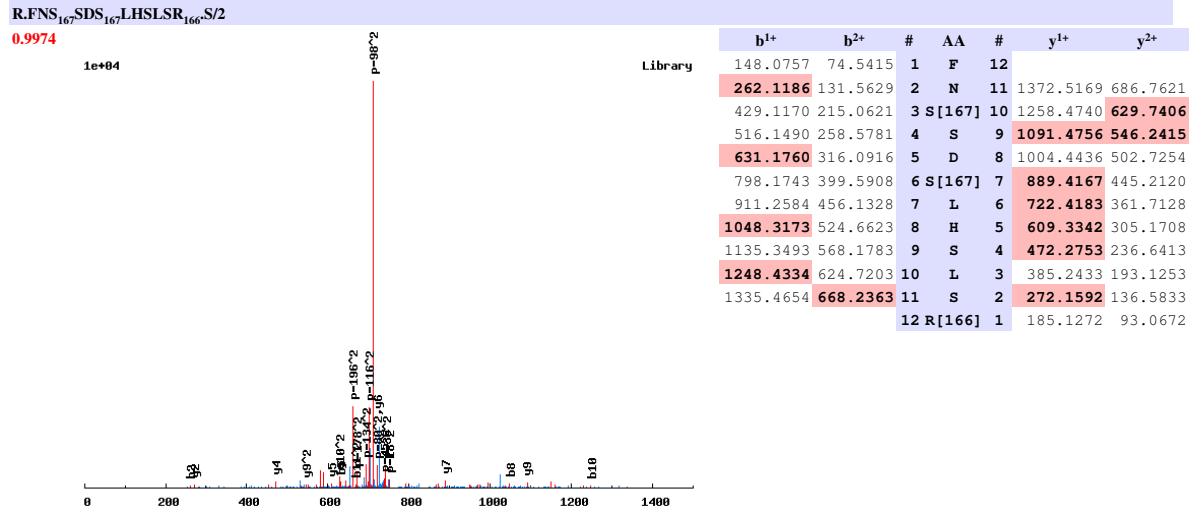

# Annotated spectra from Saleem et. al. 2009

K.FQT<sub>181</sub>PTYGT<sub>181</sub>PDNGNFLNR.T/2

0.9994

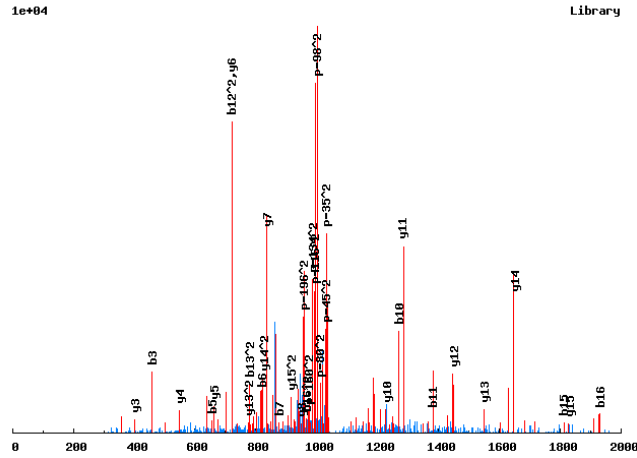

| Library | b <sup>1+</sup>  | b <sup>2+</sup> | #  | AA     | #  | y <sup>1+</sup>  | y <sup>2+</sup> |
|---------|------------------|-----------------|----|--------|----|------------------|-----------------|
|         | 148.0757         | 74.5415         | 1  | F      | 17 |                  |                 |
|         | 276.1343         | 138.5708        | 2  | Q      | 16 | 1954.7732        | 977.8902        |
|         | <b>457.1483</b>  | 229.0778        | 3  | T[181] | 15 | <b>1826.7146</b> | <b>913.8610</b> |
|         | 554.2010         | 277.6042        | 4  | P      | 14 | <b>1645.7006</b> | <b>823.3539</b> |
|         | <b>655.2487</b>  | 328.1280        | 5  | T      | 13 | <b>1548.6479</b> | <b>774.8276</b> |
|         | <b>818.3121</b>  | 409.6597        | 6  | Y      | 12 | <b>1447.6002</b> | 724.3037        |
|         | <b>875.3335</b>  | 438.1704        | 7  | G      | 11 | <b>1284.5368</b> | 642.7721        |
|         | 1056.3475        | 528.6774        | 8  | T[181] | 10 | <b>1227.5154</b> | 614.2613        |
|         | 1153.4003        | 577.2038        | 9  | P      | 9  | 1046.5014        | 523.7543        |
|         | <b>1268.4272</b> | 634.7173        | 10 | D      | 8  | <b>949.4486</b>  | 475.2279        |
|         | <b>1382.4702</b> | 691.7387        | 11 | N      | 7  | <b>834.4217</b>  | 417.7145        |
|         | 1439.4916        | <b>720.2494</b> | 12 | G      | 6  | <b>720.3787</b>  | 360.6930        |
|         | 1553.5345        | <b>777.2709</b> | 13 | N      | 5  | <b>663.3573</b>  | 332.1823        |
|         | 1700.6030        | 850.8051        | 14 | F      | 4  | <b>549.3144</b>  | 275.1608        |
|         | <b>1813.6870</b> | 907.3471        | 15 | L      | 3  | <b>402.2459</b>  | 201.6266        |
|         | <b>1927.7299</b> | <b>964.3686</b> | 16 | N      | 2  | 289.1619         | 145.0846        |
|         |                  |                 | 17 | R      | 1  | 175.1190         | 88.0631         |

# Annotated spectra from Saleem et. al. 2009

R.FSIAGGS<sub>167</sub>PS<sub>167</sub>SSQEAFDHSHGTEHGR.K/4

0.962

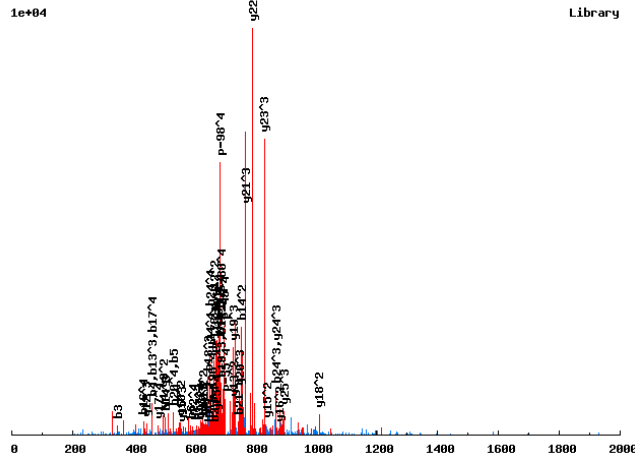

| Library | b <sup>1+</sup> | b <sup>2+</sup> | b <sup>3+</sup> | b <sup>4+</sup> | #  | AA     | #  | y <sup>1+</sup> | y <sup>2+</sup> | y <sup>3+</sup> | y <sup>4+</sup> |
|---------|-----------------|-----------------|-----------------|-----------------|----|--------|----|-----------------|-----------------|-----------------|-----------------|
|         | 148.0757        | 74.5415         | 50.0301         | 37.7744         | 1  | F      | 26 |                 |                 |                 |                 |
|         | 235.1077        | 118.0575        | 79.0408         | 59.5324         | 2  | S      | 25 | 2688.0723       | 1344.5398       | 896.6956        | 672.7735        |
|         | 348.1918        | 174.5995        | 116.7354        | 87.8034         | 3  | I      | 24 | 2601.0402       | 1301.0238       | 867.6849        | 651.0155        |
|         | 461.2758        | 231.1416        | 154.4301        | 116.0744        | 4  | I      | 23 | 2487.9562       | 1244.4817       | 829.9902        | 622.7445        |
|         | 532.3130        | 266.6601        | 178.1092        | 133.8337        | 5  | A      | 22 | 2374.8721       | 1187.9397       | 792.2956        | 594.4735        |
|         | 589.3344        | 295.1708        | 197.1163        | 148.0891        | 6  | G      | 21 | 2303.8350       | 1152.4211       | 768.6165        | 576.7142        |
|         | 646.3559        | 323.6816        | 216.1235        | 162.3444        | 7  | G      | 20 | 2246.8136       | 1123.9104       | 749.6094        | 562.4588        |
|         | 813.3542        | 407.1808        | 271.7896        | 204.0940        | 8  | S[167] | 19 | 2189.7921       | 1095.3997       | 730.6022        | 548.2035        |
|         | 910.4070        | 455.7071        | 304.1405        | 228.3572        | 9  | P      | 18 | 2022.7937       | 1011.9005       | 674.9361        | 506.4539        |
|         | 1077.4054       | 539.2063        | 359.8066        | 270.1068        | 10 | S[167] | 17 | 1925.7410       | 963.3741        | 642.5852        | 482.1907        |
|         | 1164.4374       | 582.7223        | 388.8173        | 291.8648        | 11 | S      | 16 | 1758.7426       | 879.8749        | 586.9191        | 440.4411        |
|         | 1251.4694       | 626.2383        | 417.8280        | 313.6228        | 12 | S      | 15 | 1671.7106       | 836.3589        | 557.9084        | 418.6831        |
|         | 1379.5280       | 690.2676        | 460.5142        | 345.6375        | 13 | Q      | 14 | 1584.6785       | 792.8429        | 528.8977        | 396.9251        |
|         | 1508.5706       | 754.7889        | 503.5284        | 377.8981        | 14 | E      | 13 | 1456.6200       | 728.8136        | 486.2115        | 364.9105        |
|         | 1579.6077       | 790.3075        | 527.2074        | 395.6574        | 15 | A      | 12 | 1327.5774       | 664.2923        | 443.1973        | 332.6498        |
|         | 1726.6761       | 863.8417        | 576.2302        | 432.4245        | 16 | F      | 11 | 1256.5403       | 628.7738        | 419.5183        | 314.8905        |
|         | 1841.7030       | 921.3552        | 614.5725        | 461.1812        | 17 | D      | 10 | 1109.4719       | 555.2396        | 370.4955        | 278.1234        |
|         | 1928.7351       | 964.8712        | 643.5832        | 482.9392        | 18 | S      | 9  | 994.4449        | 497.7261        | 332.1532        | 249.3667        |
|         | 2065.7940       | 1033.4006       | 689.2695        | 517.2040        | 19 | H      | 8  | 907.4129        | 454.2101        | 303.1425        | 227.6087        |
|         | 2122.8154       | 1061.9114       | 708.2767        | 531.4593        | 20 | G      | 7  | 770.3540        | 385.6806        | 257.4562        | 193.3440        |
|         | 2236.8584       | 1118.9328       | 746.2910        | 559.9701        | 21 | N      | 6  | 713.3325        | 357.1699        | 238.4490        | 179.0886        |
|         | 2337.9061       | 1169.4567       | 779.9735        | 585.2320        | 22 | T      | 5  | 599.2896        | 300.1484        | 200.4347        | 150.5779        |
|         | 2466.9486       | 1233.9780       | 822.9877        | 617.4926        | 23 | E      | 4  | 498.2419        | 249.6246        | 166.7522        | 125.3159        |
|         | 2604.0076       | 1302.5074       | 868.6740        | 651.7573        | 24 | H      | 3  | 369.1993        | 185.1033        | 123.7380        | 93.0553         |
|         | 2661.0290       | 1331.0181       | 887.6812        | 666.0127        | 25 | G      | 2  | 232.1404        | 116.5738        | 78.0517         | 58.7906         |
|         |                 |                 |                 |                 | 26 | R      | 1  | 175.1190        | 88.0631         | 59.0445         | 44.5352         |

# Annotated spectra from Saleem et. al. 2009

R.FSLGAASTT<sub>181</sub>S<sub>167</sub>LVNSK<sub>136</sub>-L/2

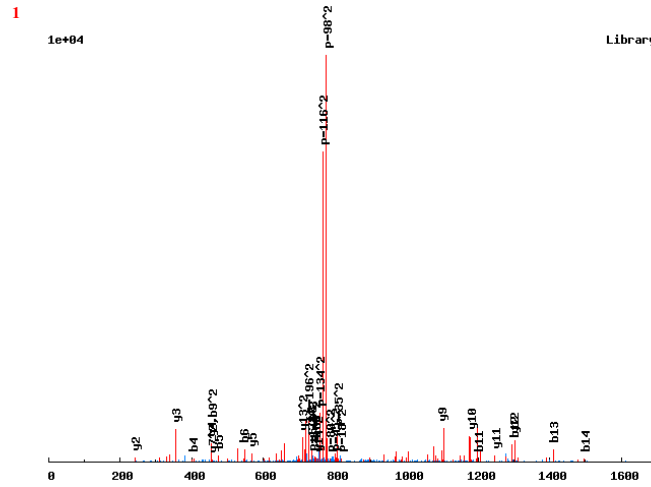

| Library | b <sup>1+</sup> | b <sup>2+</sup> | #  | AA     | #  | y <sup>1+</sup> | y <sup>2+</sup> |
|---------|-----------------|-----------------|----|--------|----|-----------------|-----------------|
|         | 148.0757        | 74.5415         | 1  | F      | 15 |                 |                 |
|         | 235.1077        | 118.0575        | 2  | S      | 14 | 1503.6583       | 752.3328        |
|         | 348.1918        | 174.5995        | 3  | L      | 13 | 1416.6263       | 708.8168        |
|         | 405.2132        | 203.1103        | 4  | G      | 12 | 1303.5422       | 652.2747        |
|         | 476.2503        | 238.6288        | 5  | A      | 11 | 1246.5207       | 623.7640        |
|         | 547.2875        | 274.1474        | 6  | A      | 10 | 1175.4836       | 588.2455        |
|         | 634.3195        | 317.6634        | 7  | S      | 9  | 1104.4465       | 552.7269        |
|         | 735.3672        | 368.1872        | 8  | T      | 8  | 1017.4145       | 509.2109        |
|         | 916.3812        | 458.6942        | 9  | T[181] | 7  | 916.3668        | 458.6870        |
|         | 1083.3795       | 542.1934        | 10 | S[167] | 6  | 735.3528        | 368.1800        |
|         | 1196.4636       | 598.7354        | 11 | L      | 5  | 568.3544        | 284.6809        |
|         | 1295.5320       | 648.2696        | 12 | V      | 4  | 455.2704        | 228.1388        |
|         | 1409.5749       | 705.2911        | 13 | N      | 3  | 356.2020        | 178.6046        |
|         | 1496.6070       | 748.8071        | 14 | S      | 2  | 242.1590        | 121.5832        |
|         |                 |                 | 15 | K[136] | 1  | 155.1270        | 78.0671         |



# Annotated spectra from Saleem et. al. 2009

R.FST<sub>181</sub>LGS<sub>167</sub>R<sub>166</sub>EFSTSNLR<sub>166</sub>S/3

0.9895

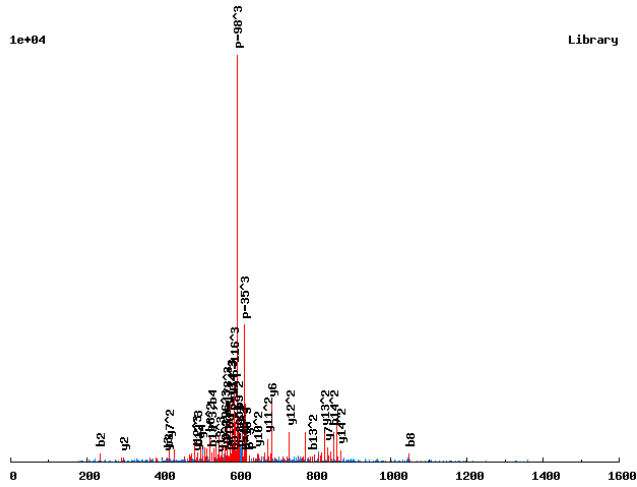

| Library | b <sup>1+</sup>  | b <sup>2+</sup> | b <sup>3+</sup> | #  | AA     | #  | y <sup>1+</sup> | y <sup>2+</sup> | y <sup>3+</sup> |
|---------|------------------|-----------------|-----------------|----|--------|----|-----------------|-----------------|-----------------|
|         | 148.0757         | 74.5415         | 50.0301         | 1  | F      | 15 |                 |                 |                 |
|         | <b>235.1077</b>  | 118.0575        | 79.0408         | 2  | S      | 14 | 1734.7362       | <b>867.8718</b> | <b>578.9169</b> |
|         | <b>416.1217</b>  | 208.5645        | 139.3788        | 3  | T[181] | 13 | 1647.7042       | <b>824.3558</b> | <b>549.9063</b> |
|         | <b>529.2058</b>  | 265.1065        | 177.0735        | 4  | L      | 12 | 1466.6902       | <b>733.8487</b> | <b>489.5683</b> |
|         | <b>586.2273</b>  | 293.6173        | 196.0806        | 5  | G      | 11 | 1353.6061       | <b>677.3067</b> | 451.8736        |
|         | 753.2256         | 377.1164        | 251.7467        | 6  | S[167] | 10 | 1296.5847       | <b>648.7960</b> | 432.8664        |
|         | 919.3350         | 460.1711        | 307.1165        | 7  | R[166] | 9  | 1129.5863       | <b>565.2968</b> | 377.2003        |
|         | <b>1048.3776</b> | <b>524.6924</b> | 350.1307        | 8  | E      | 8  | 963.4769        | 482.2421        | 321.8305        |
|         | 1195.4460        | <b>598.2266</b> | 399.1535        | 9  | F      | 7  | <b>834.4344</b> | <b>417.7208</b> | 278.8163        |
|         | 1282.4780        | 641.7427        | 428.1642        | 10 | S      | 6  | <b>687.3659</b> | 344.1866        | 229.7935        |
|         | 1383.5257        | 692.2665        | 461.8468        | 11 | T      | 5  | <b>600.3339</b> | 300.6706        | 200.7828        |
|         | 1470.5577        | 735.7825        | <b>490.8574</b> | 12 | S      | 4  | <b>499.2862</b> | 250.1468        | 167.1003        |
|         | 1584.6007        | <b>792.8040</b> | <b>528.8717</b> | 13 | N      | 3  | <b>412.2542</b> | 206.6307        | 138.0896        |
|         | 1697.6847        | <b>849.3460</b> | 566.5664        | 14 | L      | 2  | <b>298.2113</b> | 149.6093        | 100.0753        |
|         |                  |                 |                 | 15 | R[166] | 1  | 185.1272        | 93.0672         | 62.3806         |

# Annotated spectra from Saleem et. al. 2009

K.FSVSS<sub>167</sub>NDSQNS<sub>167</sub>LK<sub>136</sub>NGDPHVK<sub>136</sub>A/3

0.8656

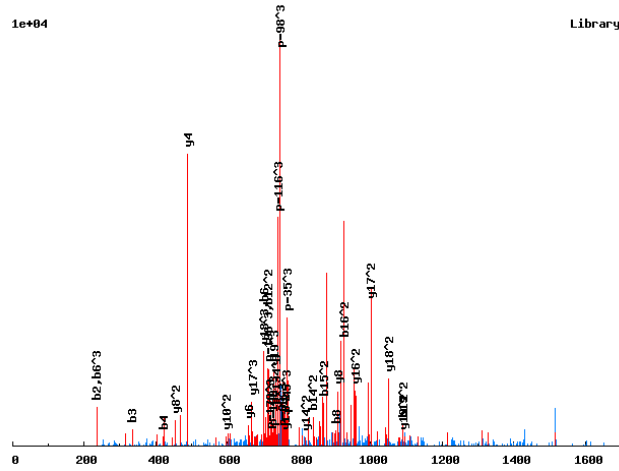

| Library | b <sup>1+</sup> | b <sup>2+</sup>  | b <sup>3+</sup> | #  | AA     | #  | y <sup>1+</sup> | y <sup>2+</sup>  | y <sup>3+</sup> |
|---------|-----------------|------------------|-----------------|----|--------|----|-----------------|------------------|-----------------|
|         | 148.0757        | 74.5415          | 50.0301         | 1  | F      | 20 |                 |                  |                 |
|         | <b>235.1077</b> | 118.0575         | 79.0408         | 2  | S      | 19 | 2188.9242       | <b>1094.9658</b> | <b>730.3129</b> |
|         | <b>334.1761</b> | 167.5917         | 112.0636        | 3  | V      | 18 | 2101.8922       | <b>1051.4497</b> | <b>701.3023</b> |
|         | <b>421.2082</b> | 211.1077         | 141.0742        | 4  | S      | 17 | 2002.8238       | <b>1001.9155</b> | <b>668.2794</b> |
|         | 588.2065        | 294.6069         | 196.7404        | 5  | S[167] | 16 | 1915.7918       | <b>958.3995</b>  | 639.2688        |
|         | <b>702.2495</b> | 351.6284         | <b>234.7547</b> | 6  | N      | 15 | 1748.7934       | 874.9003         | 583.6027        |
|         | 817.2764        | 409.1418         | 273.0970        | 7  | D      | 14 | 1634.7505       | <b>817.8789</b>  | 545.5883        |
|         | <b>904.3084</b> | 452.6579         | 302.1077        | 8  | S      | 13 | 1519.7235       | <b>760.3654</b>  | 507.2460        |
|         | 1032.3670       | 516.6871         | 344.7939        | 9  | Q      | 12 | 1432.6915       | 716.8494         | 478.2354        |
|         | 1146.4099       | 573.7086         | 382.8082        | 10 | N      | 11 | 1304.6329       | 652.8201         | 435.5492        |
|         | 1313.4083       | 657.2078         | 438.4743        | 11 | S[167] | 10 | 1190.5900       | <b>595.7986</b>  | 397.5348        |
|         | 1426.4924       | <b>713.7498</b>  | 476.1690        | 12 | L      | 9  | 1023.5916       | 512.2995         | 341.8687        |
|         | 1562.6015       | 781.8044         | 521.5387        | 13 | K[136] | 8  | <b>910.5076</b> | <b>455.7574</b>  | 304.1740        |
|         | 1676.6444       | <b>838.8259</b>  | 559.5530        | 14 | N      | 7  | 774.3984        | 387.7028         | 258.8043        |
|         | 1733.6659       | <b>867.3366</b>  | 578.5602        | 15 | G      | 6  | <b>660.3555</b> | 330.6814         | 220.7900        |
|         | 1848.6928       | <b>924.8501</b>  | 616.9025        | 16 | D      | 5  | 603.3340        | 302.1706         | 201.7829        |
|         | 1945.7456       | 973.3764         | 649.2534        | 17 | P      | 4  | <b>488.3071</b> | 244.6572         | 163.4405        |
|         | 2082.8045       | 1041.9059        | 694.9397        | 18 | H      | 3  | 391.2543        | 196.1308         | 131.0896        |
|         | 2181.8729       | <b>1091.4401</b> | 727.9625        | 19 | V      | 2  | 254.1954        | 127.6013         | 85.4033         |
|         |                 |                  |                 | 20 | K[136] | 1  | 155.1270        | 78.0671          | 52.3805         |

# Annotated spectra from Saleem et. al. 2009

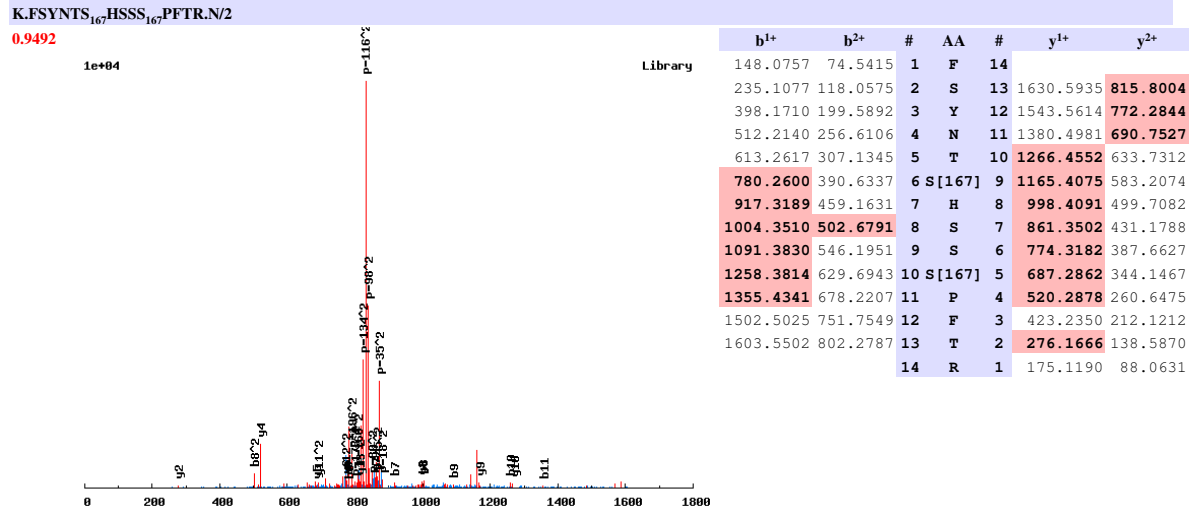

# Annotated spectra from Saleem et. al. 2009

K.FTKHPES<sub>167</sub>S<sub>167</sub>LEELQK.H/2

0.8712

1e+04

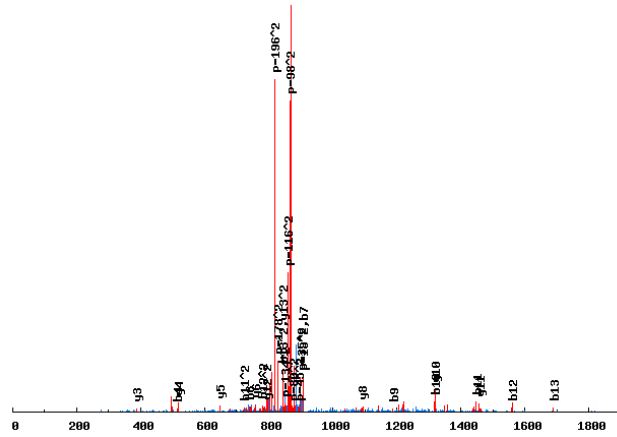

| Library | b <sup>1+</sup> | b <sup>2+</sup> | #  | AA     | #  | y <sup>1+</sup> | y <sup>2+</sup> |
|---------|-----------------|-----------------|----|--------|----|-----------------|-----------------|
|         | 148.0757        | 74.5415         | 1  | F      | 14 |                 |                 |
|         | 249.1234        | 125.0653        | 2  | T      | 13 | 1685.7183       | 843.3628        |
|         | 377.2183        | 189.1128        | 3  | K      | 12 | 1584.6706       | 792.8390        |
|         | 514.2772        | 257.6423        | 4  | H      | 11 | 1456.5757       | 728.7915        |
|         | 611.3300        | 306.1686        | 5  | P      | 10 | 1319.5168       | 660.2620        |
|         | 740.3726        | 370.6899        | 6  | E      | 9  | 1222.4640       | 611.7356        |
|         | 907.3710        | 454.1891        | 7  | S[167] | 8  | 1093.4214       | 547.2143        |
|         | 1074.3693       | 537.6883        | 8  | S[167] | 7  | 926.4230        | 463.7152        |
|         | 1187.4534       | 594.2303        | 9  | L      | 6  | 759.4247        | 380.2160        |
|         | 1316.4960       | 658.7516        | 10 | E      | 5  | 646.3406        | 323.6740        |
|         | 1445.5386       | 723.2729        | 11 | E      | 4  | 517.2980        | 259.1527        |
|         | 1558.6226       | 779.8149        | 12 | L      | 3  | 388.2554        | 194.6314        |
|         | 1686.6812       | 843.8442        | 13 | Q      | 2  | 275.1714        | 138.0893        |
|         |                 |                 | 14 | K      | 1  | 147.1128        | 74.0600         |

# Annotated spectra from Saleem et. al. 2009

R.FTY<sub>243</sub>NSVS<sub>167</sub>PR.S/2

0.9845

1e+04

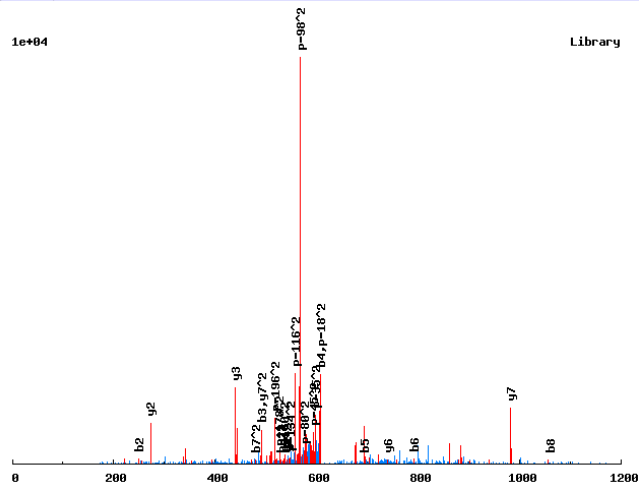

| Library | b <sup>1+</sup> | b <sup>2+</sup> | # | AA      | # | y <sup>1+</sup> | y <sup>2+</sup> |
|---------|-----------------|-----------------|---|---------|---|-----------------|-----------------|
|         | 148.0757        | 74.5415         | 1 | F       | 9 |                 |                 |
|         | 249.1234        | 125.0653        | 2 | T       | 8 | 1083.3908       | 542.1990        |
|         | 492.1530        | 246.5802        | 3 | Y [243] | 7 | 982.3431        | 491.6752        |
|         | 606.1960        | 303.6016        | 4 | N       | 6 | 739.3134        | 370.1604        |
|         | 693.2280        | 347.1176        | 5 | S       | 5 | 625.2705        | 313.1389        |
|         | 792.2964        | 396.6518        | 6 | V       | 4 | 538.2385        | 269.6229        |
|         | 959.2948        | 480.1510        | 7 | S [167] | 3 | 439.1701        | 220.0887        |
|         | 1056.3475       | 528.6774        | 8 | P       | 2 | 272.1717        | 136.5895        |
|         |                 |                 | 9 | R       | 1 | 175.1190        | 88.0631         |

# Annotated spectra from Saleem et. al. 2009

K.GAIVSGDNPEEEDVDAS<sub>167</sub>EFEDEVKPVRT/3

0.9252

1e+04

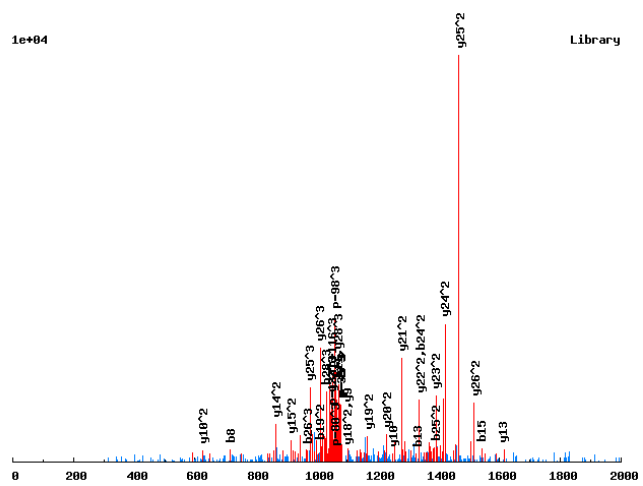

| Library | b <sup>1+</sup> | b <sup>2+</sup> | b <sup>3+</sup> | #  | AA      | #  | y <sup>1+</sup> | y <sup>2+</sup> | y <sup>3+</sup> |
|---------|-----------------|-----------------|-----------------|----|---------|----|-----------------|-----------------|-----------------|
|         | 58.0287         | 29.5180         | 20.0144         | 1  | G       | 29 |                 |                 |                 |
|         | 129.0659        | 65.0366         | 43.6935         | 2  | A       | 28 | 3213.3630       | 1607.1852       | 1071.7925       |
|         | 242.1499        | 121.5786        | 81.3882         | 3  | I       | 27 | 3142.3259       | 1571.6666       | 1048.1135       |
|         | 341.2183        | 171.1128        | 114.4110        | 4  | V       | 26 | 3029.2419       | 1515.1246       | 1010.4188       |
|         | 428.2504        | 214.6288        | 143.4216        | 5  | S       | 25 | 2930.1734       | 1465.5904       | 977.3960        |
|         | 485.2718        | 243.1395        | 162.4288        | 6  | G       | 24 | 2843.1414       | 1422.0743       | 948.3853        |
|         | 600.2988        | 300.6530        | 200.7711        | 7  | D       | 23 | 2786.1200       | 1393.5636       | 929.3782        |
|         | 714.3417        | 357.6745        | 238.7854        | 8  | N       | 22 | 2671.0930       | 1336.0501       | 891.0359        |
|         | 811.3944        | 406.2009        | 271.1363        | 9  | P       | 21 | 2557.0501       | 1279.0287       | 853.0215        |
|         | 940.4370        | 470.7222        | 314.1505        | 10 | E       | 20 | 2459.9973       | 1230.5023       | 820.6706        |
|         | 1069.4796       | 535.2435        | 357.1647        | 11 | E       | 19 | 2330.9547       | 1165.9810       | 777.6564        |
|         | 1198.5222       | 599.7647        | 400.1789        | 12 | E       | 18 | 2201.9121       | 1101.4597       | 734.6422        |
|         | 1327.5648       | 664.2860        | 443.1931        | 13 | E       | 17 | 2072.8696       | 1036.9384       | 691.6280        |
|         | 1442.5917       | 721.7995        | 481.5354        | 14 | D       | 16 | 1943.8270       | 972.4171        | 648.6138        |
|         | 1541.6602       | 771.3337        | 514.5582        | 15 | V       | 15 | 1828.8000       | 914.9037        | 610.2715        |
|         | 1656.6871       | 828.8472        | 552.9006        | 16 | D       | 14 | 1729.7316       | 865.3694        | 577.2487        |
|         | 1727.7242       | 864.3657        | 576.5796        | 17 | A       | 13 | 1614.7047       | 807.8560        | 538.9064        |
|         | 1894.7226       | 947.8649        | 632.2457        | 18 | S [167] | 12 | 1543.6676       | 772.3374        | 515.2274        |
|         | 2023.7652       | 1012.3862       | 675.2599        | 19 | E       | 11 | 1376.6692       | 688.8382        | 459.5613        |
|         | 2170.8336       | 1085.9204       | 724.2827        | 20 | F       | 10 | 1247.6266       | 624.3169        | 416.5471        |
|         | 2299.8762       | 1150.4417       | 767.2969        | 21 | E       | 9  | 1100.5582       | 550.7827        | 367.5243        |
|         | 2428.9187       | 1214.9630       | 810.3111        | 22 | E       | 8  | 971.5156        | 486.2614        | 324.5101        |
|         | 2543.9457       | 1272.4765       | 848.6534        | 23 | D       | 7  | 842.4730        | 421.7402        | 281.4959        |
|         | 2672.9883       | 1336.9978       | 891.6676        | 24 | E       | 6  | 727.4461        | 364.2267        | 243.1535        |
|         | 2772.0567       | 1386.5320       | 924.6904        | 25 | V       | 5  | 598.4035        | 299.7054        | 200.1394        |
|         | 2900.1516       | 1450.5795       | 967.3887        | 26 | K       | 4  | 499.3351        | 250.1712        | 167.1165        |
|         | 2997.2044       | 1499.1058       | 999.7397        | 27 | P       | 3  | 371.2401        | 186.1237        | 124.4182        |
|         | 3096.2728       | 1548.6400       | 1032.7625       | 28 | V       | 2  | 274.1874        | 137.5973        | 92.0673         |
|         |                 |                 |                 | 29 | R       | 1  | 175.1190        | 88.0631         | 59.0445         |

# Annotated spectra from Saleem et. al. 2009

K.GC<sub>160</sub>LTFEPNPS<sub>167</sub>PNSS<sub>167</sub>PDLLSK<sub>136</sub>N/2

0.991

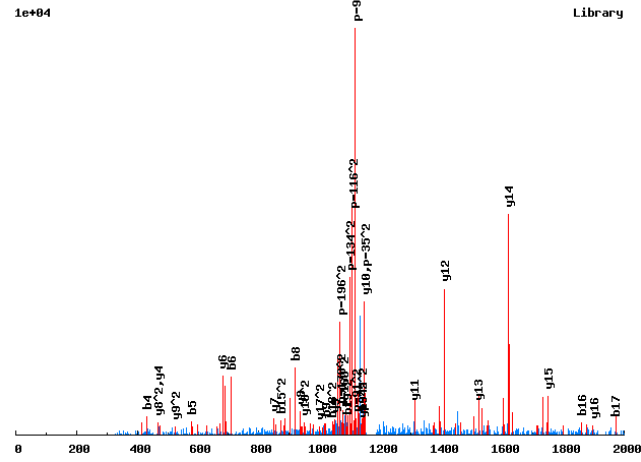

| Library | b <sup>1+</sup> | b <sup>2+</sup> | #  | AA     | #  | y <sup>1+</sup> | y <sup>2+</sup> |
|---------|-----------------|-----------------|----|--------|----|-----------------|-----------------|
|         | 58.0287         | 29.5180         | 1  | G      | 20 |                 |                 |
|         | 218.0594        | 109.5333        | 2  | C[160] | 19 | 2270.9531       | 1135.9802       |
|         | 331.1435        | 166.0754        | 3  | L      | 18 | 2110.9225       | 1055.9649       |
|         | 432.1911        | 216.5992        | 4  | T      | 17 | 1997.8384       | 999.4229        |
|         | 579.2595        | 290.1334        | 5  | F      | 16 | 1896.7907       | 948.8990        |
|         | 708.3021        | 354.6547        | 6  | E      | 15 | 1749.7223       | 875.3648        |
|         | 805.3549        | 403.1811        | 7  | P      | 14 | 1620.6797       | 810.8435        |
|         | 919.3978        | 460.2026        | 8  | N      | 13 | 1523.6270       | 762.3171        |
|         | 1016.4506       | 508.7289        | 9  | P      | 12 | 1409.5841       | 705.2957        |
|         | 1183.4489       | 592.2281        | 10 | S[167] | 11 | 1312.5313       | 656.7693        |
|         | 1280.5017       | 640.7545        | 11 | P      | 10 | 1145.5329       | 573.2701        |
|         | 1394.5446       | 697.7760        | 12 | N      | 9  | 1048.4802       | 524.7437        |
|         | 1481.5767       | 741.2920        | 13 | S      | 8  | 934.4372        | 467.7223        |
|         | 1648.5750       | 824.7912        | 14 | S[167] | 7  | 847.4052        | 424.2062        |
|         | 1745.6278       | 873.3175        | 15 | P      | 6  | 680.4068        | 340.7071        |
|         | 1860.6547       | 930.8310        | 16 | D      | 5  | 583.3541        | 292.1807        |
|         | 1973.7388       | 987.3730        | 17 | L      | 4  | 468.3271        | 234.6672        |
|         | 2086.8228       | 1043.9151       | 18 | L      | 3  | 355.2431        | 178.1252        |
|         | 2173.8549       | 1087.4311       | 19 | S      | 2  | 242.1590        | 121.5832        |
|         |                 |                 | 20 | K[136] | 1  | 155.1270        | 78.0671         |

# Annotated spectra from Saleem et. al. 2009

R.GDNNS<sub>167</sub>SHSPIS<sub>167</sub>PLK<sub>136</sub>IETAPQESPK<sub>136</sub>F/3

0.997

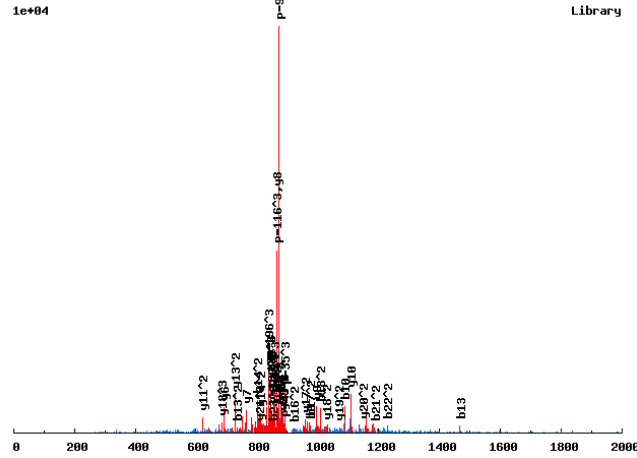

| Library | b <sup>1+</sup> | b <sup>2+</sup> | b <sup>3+</sup> | #  | AA      | #  | y <sup>1+</sup> | y <sup>2+</sup> | y <sup>3+</sup> |
|---------|-----------------|-----------------|-----------------|----|---------|----|-----------------|-----------------|-----------------|
|         | 58.0287         | 29.5180         | 20.0144         | 1  | G       | 24 |                 |                 |                 |
|         | 173.0557        | 87.0315         | 58.3567         | 2  | D       | 23 | 2652.1924       | 1326.5999       | 884.7357        |
|         | 287.0986        | 144.0529        | 96.3711         | 3  | N       | 22 | 2537.1655       | 1269.0864       | 846.3934        |
|         | 401.1415        | 201.0744        | 134.3854        | 4  | N       | 21 | 2423.1226       | 1212.0649       | 808.3790        |
|         | 568.1399        | 284.5736        | 190.0515        | 5  | S [167] | 20 | 2309.0796       | 1155.0435       | 770.3647        |
|         | 655.1719        | 328.0896        | 219.0622        | 6  | S       | 19 | 2142.0813       | 1071.5443       | 714.6986        |
|         | 792.2308        | 396.6191        | 264.7485        | 7  | H       | 18 | 2055.0493       | 1028.0283       | 685.6879        |
|         | 879.2629        | 440.1351        | 293.7591        | 8  | S       | 17 | 1917.9903       | 959.4988        | 640.0016        |
|         | 976.3156        | 488.6615        | 326.1101        | 9  | P       | 16 | 1830.9583       | 915.9828        | 610.9910        |
|         | 1089.3997       | 545.2035        | 363.8048        | 10 | I       | 15 | 1733.9056       | 867.4564        | 578.6400        |
|         | 1256.3981       | 628.7027        | 419.4709        | 11 | S [167] | 14 | 1620.8215       | 810.9144        | 540.9454        |
|         | 1353.4508       | 677.2290        | 451.8218        | 12 | P       | 13 | 1453.8231       | 727.4152        | 485.2792        |
|         | 1466.5349       | 733.7711        | 489.5165        | 13 | L       | 12 | 1356.7704       | 678.8888        | 452.9283        |
|         | 1602.6440       | 801.8257        | 534.8862        | 14 | K [136] | 11 | 1243.6863       | 622.3468        | 415.2336        |
|         | 1715.7281       | 858.3677        | 572.5809        | 15 | I       | 10 | 1107.5772       | 554.2922        | 369.8639        |
|         | 1844.7707       | 922.8890        | 615.5951        | 16 | E       | 9  | 994.4931        | 497.7502        | 332.1692        |
|         | 1945.8184       | 973.4128        | 649.2776        | 17 | T       | 8  | 865.4505        | 433.2289        | 289.1550        |
|         | 2016.8555       | 1008.9314       | 672.9567        | 18 | A       | 7  | 764.4028        | 382.7051        | 255.4725        |
|         | 2113.9082       | 1057.4578       | 705.3076        | 19 | P       | 6  | 693.3657        | 347.1865        | 231.7934        |
|         | 2241.9668       | 1121.4870       | 747.9938        | 20 | Q       | 5  | 596.3130        | 298.6601        | 199.4425        |
|         | 2371.0094       | 1186.0083       | 791.0080        | 21 | E       | 4  | 468.2544        | 234.6308        | 156.7563        |
|         | 2458.0414       | 1229.5244       | 820.0187        | 22 | S       | 3  | 339.2118        | 170.1095        | 113.7421        |
|         | 2555.0942       | 1278.0507       | 852.3696        | 23 | P       | 2  | 252.1798        | 126.5935        | 84.7314         |
|         |                 |                 |                 | 24 | K [136] | 1  | 155.1270        | 78.0671         | 52.3805         |



# Annotated spectra from Saleem et. al. 2009

R.GDNTGDQNAVEKS<sub>167</sub>DFEKS<sub>167</sub>DTEGSR<sub>1/3</sub>

0.9998

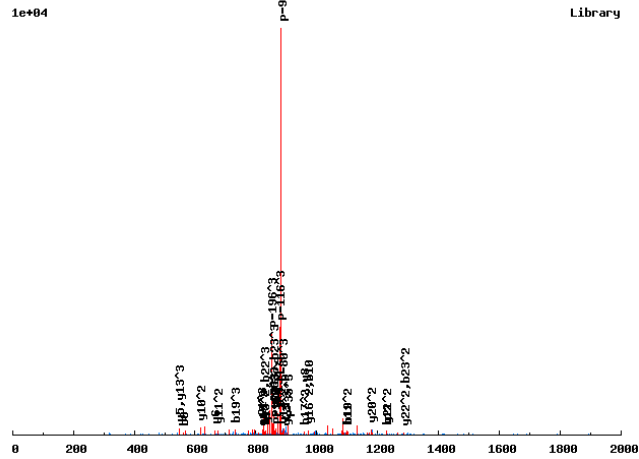

| Library | b <sup>1+</sup> | b <sup>2+</sup> | b <sup>3+</sup> | #  | AA     | #  | y <sup>1+</sup> | y <sup>2+</sup> | y <sup>3+</sup> |
|---------|-----------------|-----------------|-----------------|----|--------|----|-----------------|-----------------|-----------------|
|         | 58.0287         | 29.5180         | 20.0144         | 1  | G      | 24 |                 |                 |                 |
|         | 173.0557        | 87.0315         | 58.3567         | 2  | D      | 23 | 2689.0298       | 1345.0185       | 897.0148        |
|         | 287.0986        | 144.0529        | 96.3711         | 3  | N      | 22 | 2574.0029       | 1287.5051       | 858.6725        |
|         | 388.1463        | 194.5768        | 130.0536        | 4  | T      | 21 | 2459.9599       | 1230.4836       | 820.6582        |
|         | 445.1677        | 223.0875        | 149.0608        | 5  | G      | 20 | 2358.9123       | 1179.9598       | 786.9756        |
|         | 560.1947        | 280.6010        | 187.4031        | 6  | D      | 19 | 2301.8908       | 1151.4490       | 767.9685        |
|         | 688.2533        | 344.6303        | 230.0893        | 7  | Q      | 18 | 2186.8639       | 1093.9356       | 729.6261        |
|         | 802.2962        | 401.6517        | 268.1036        | 8  | N      | 17 | 2058.8053       | 1029.9063       | 686.9399        |
|         | 873.3333        | 437.1703        | 291.7826        | 9  | A      | 16 | 1944.7623       | 972.8848        | 648.9256        |
|         | 972.4017        | 486.7045        | 324.8054        | 10 | V      | 15 | 1873.7252       | 937.3663        | 625.2466        |
|         | 1101.4443       | 551.2258        | 367.8196        | 11 | E      | 14 | 1774.6568       | 887.8321        | 592.2238        |
|         | 1229.5393       | 615.2733        | 410.5179        | 12 | K      | 13 | 1645.6142       | 823.3108        | 549.2096        |
|         | 1396.5376       | 698.7725        | 466.1841        | 13 | S[167] | 12 | 1517.5193       | 759.2633        | 506.5113        |
|         | 1511.5646       | 756.2859        | 504.5264        | 14 | D      | 11 | 1350.5209       | 675.7641        | 450.8452        |
|         | 1658.6330       | 829.8201        | 553.5492        | 15 | F      | 10 | 1235.4940       | 618.2506        | 412.5028        |
|         | 1787.6756       | 894.3414        | 596.5634        | 16 | E      | 9  | 1088.4256       | 544.7164        | 363.4800        |
|         | 1915.7705       | 958.3889        | 639.2617        | 17 | K      | 8  | 959.3830        | 480.1951        | 320.4658        |
|         | 2082.7689       | 1041.8881       | 694.9278        | 18 | S[167] | 7  | 831.2880        | 416.1476        | 277.7675        |
|         | 2197.7958       | 1099.4016       | 733.2701        | 19 | D      | 6  | 664.2897        | 332.6485        | 222.1014        |
|         | 2298.8435       | 1149.9254       | 766.9527        | 20 | T      | 5  | 549.2627        | 275.1350        | 183.7591        |
|         | 2427.8861       | 1214.4467       | 809.9669        | 21 | E      | 4  | 448.2150        | 224.6112        | 150.0765        |
|         | 2484.9076       | 1242.9574       | 828.9740        | 22 | G      | 3  | 319.1724        | 160.0899        | 107.0623        |
|         | 2571.9396       | 1286.4734       | 857.9847        | 23 | S      | 2  | 262.1510        | 131.5791        | 88.0552         |
|         |                 |                 |                 | 24 | R      | 1  | 175.1190        | 88.0631         | 59.0445         |

# Annotated spectra from Saleem et. al. 2009

K.GES<sub>167</sub>YQS<sub>167</sub>AEQEIDHTAPEK.S/2

0.9593

1e+04

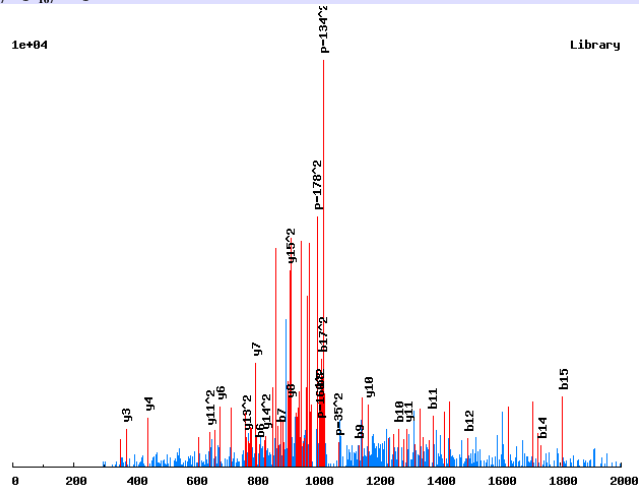

Library

| b <sup>1+</sup> | b <sup>2+</sup> | #  | AA     | #  | y <sup>1+</sup> | y <sup>2+</sup> |
|-----------------|-----------------|----|--------|----|-----------------|-----------------|
| 58.0287         | 29.5180         | 1  | G      | 18 |                 |                 |
| 187.0713        | 94.0393         | 2  | E      | 17 | 2121.8049       | 1061.4061       |
| 354.0697        | 177.5385        | 3  | S[167] | 16 | 1992.7624       | 996.8848        |
| 517.1330        | 259.0702        | 4  | Y      | 15 | 1825.7640       | 913.3856        |
| 645.1916        | 323.0994        | 5  | Q      | 14 | 1662.7007       | 831.8540        |
| 812.1900        | 406.5986        | 6  | S[167] | 13 | 1534.6421       | 767.8247        |
| 883.2271        | 442.1172        | 7  | A      | 12 | 1367.6437       | 684.3255        |
| 1012.2697       | 506.6385        | 8  | E      | 11 | 1296.6066       | 648.8069        |
| 1140.3282       | 570.6678        | 9  | Q      | 10 | 1167.5640       | 584.2857        |
| 1269.3708       | 635.1891        | 10 | E      | 9  | 1039.5054       | 520.2564        |
| 1382.4549       | 691.7311        | 11 | I      | 8  | 910.4629        | 455.7351        |
| 1497.4818       | 749.2446        | 12 | D      | 7  | 797.3788        | 399.1930        |
| 1634.5407       | 817.7740        | 13 | H      | 6  | 682.3519        | 341.6796        |
| 1735.5884       | 868.2979        | 14 | T      | 5  | 545.2929        | 273.1501        |
| 1806.6255       | 903.8164        | 15 | A      | 4  | 444.2453        | 222.6263        |
| 1903.6783       | 952.3428        | 16 | P      | 3  | 373.2081        | 187.1077        |
| 2032.7209       | 1016.8641       | 17 | E      | 2  | 276.1554        | 138.5813        |
|                 |                 | 18 | K      | 1  | 147.1128        | 74.0600         |

# Annotated spectra from Saleem et. al. 2009

R.GEYY<sub>243</sub>NQDNDGLEDESE<sub>167</sub>EQEADVPK<sub>136</sub>R<sub>166</sub>/S/3

0.9917

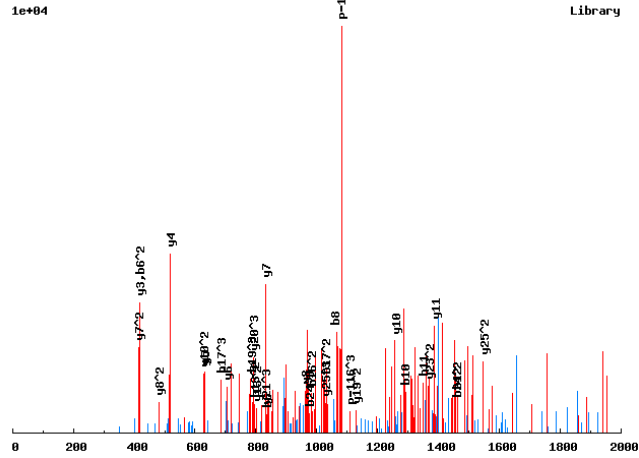

| Library | b <sup>1+</sup> | b <sup>2+</sup> | b <sup>3+</sup> | #  | AA      | #  | y <sup>1+</sup> | y <sup>2+</sup> | y <sup>3+</sup> |
|---------|-----------------|-----------------|-----------------|----|---------|----|-----------------|-----------------|-----------------|
|         | 58.0287         | 29.5180         | 20.0144         | 1  | G       | 28 |                 |                 |                 |
|         | 187.0713        | 94.0393         | 63.0286         | 2  | E       | 27 | 3380.2754       | 1690.6413       | 1127.4300       |
|         | 350.1347        | 175.5710        | 117.3831        | 3  | Y       | 26 | 3251.2328       | 1626.1200       | 1084.4158       |
|         | 593.1643        | 297.0858        | 198.3930        | 4  | Y [243] | 25 | 3088.1695       | 1544.5884       | 1030.0613       |
|         | 707.2073        | 354.1073        | 236.4073        | 5  | N       | 24 | 2845.1398       | 1423.0735       | 949.0515        |
|         | 835.2658        | 418.1366        | 279.0935        | 6  | Q       | 23 | 2731.0969       | 1366.0521       | 911.0371        |
|         | 950.2928        | 475.6500        | 317.4358        | 7  | D       | 22 | 2603.0383       | 1302.0228       | 868.3510        |
|         | 1064.3357       | 532.6715        | 355.4501        | 8  | N       | 21 | 2488.0114       | 1244.5093       | 830.0086        |
|         | 1178.3786       | 589.6930        | 393.4644        | 9  | N       | 20 | 2373.9684       | 1187.4879       | 791.9943        |
|         | 1293.4056       | 647.2064        | 431.8067        | 10 | D       | 19 | 2259.9255       | 1130.4664       | 753.9800        |
|         | 1350.4270       | 675.7172        | 450.8139        | 11 | G       | 18 | 2144.8986       | 1072.9529       | 715.6377        |
|         | 1463.5111       | 732.2592        | 488.5086        | 12 | L       | 17 | 2087.8771       | 1044.4422       | 696.6306        |
|         | 1592.5537       | 796.7805        | 531.5227        | 13 | E       | 16 | 1974.7930       | 987.9002        | 658.9359        |
|         | 1721.5963       | 861.3018        | 574.5369        | 14 | E       | 15 | 1845.7505       | 923.3789        | 615.9217        |
|         | 1836.6232       | 918.8152        | 612.8793        | 15 | D       | 14 | 1716.7079       | 858.8576        | 572.9075        |
|         | 1965.6658       | 983.3365        | 655.8935        | 16 | E       | 13 | 1601.6809       | 801.3441        | 534.5652        |
|         | 2052.6978       | 1026.8526       | 684.9041        | 17 | S       | 12 | 1472.6383       | 736.8228        | 491.5510        |
|         | 2181.7404       | 1091.3739       | 727.9183        | 18 | E       | 11 | 1385.6063       | 693.3068        | 462.5403        |
|         | 2348.7388       | 1174.8730       | 783.5844        | 19 | S [167] | 10 | 1256.5637       | 628.7855        | 419.5261        |
|         | 2477.7814       | 1239.3943       | 826.5986        | 20 | E       | 9  | 1089.5654       | 545.2863        | 363.8600        |
|         | 2605.8400       | 1303.4236       | 869.2848        | 21 | Q       | 8  | 960.5228        | 480.7650        | 320.8458        |
|         | 2734.8825       | 1367.9449       | 912.2990        | 22 | E       | 7  | 832.4642        | 416.7357        | 278.1596        |
|         | 2805.9197       | 1403.4635       | 935.9781        | 23 | A       | 6  | 703.4216        | 352.2144        | 235.1454        |
|         | 2920.9466       | 1460.9769       | 974.3204        | 24 | D       | 5  | 632.3845        | 316.6959        | 211.4663        |
|         | 3020.0150       | 1510.5111       | 1007.3432       | 25 | V       | 4  | 517.3575        | 259.1824        | 173.1240        |
|         | 3117.0678       | 1559.0375       | 1039.6941       | 26 | P       | 3  | 418.2891        | 209.6482        | 140.1012        |
|         | 3253.1769       | 1627.0921       | 1085.0638       | 27 | R [136] | 2  | 321.2364        | 161.1218        | 107.7503        |
|         |                 |                 |                 | 28 | R [166] | 1  | 185.1272        | 93.0672         | 62.3806         |

# Annotated spectra from Saleem et. al. 2009

R.GGAENNTSAS<sub>167</sub>T<sub>181</sub>LPGDR.T/2

0.9921

1e+04

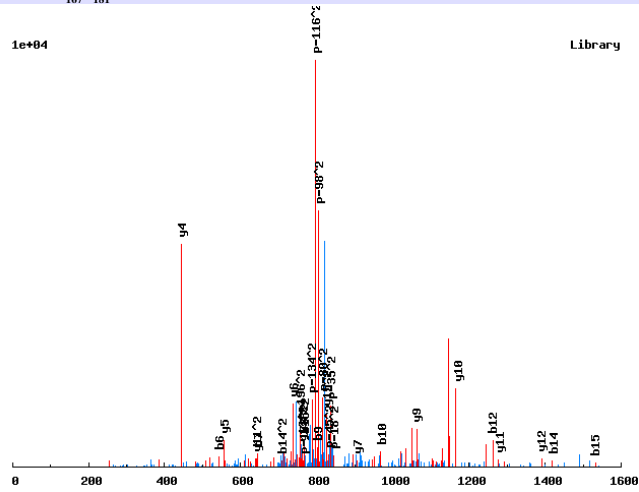

| Library | b <sup>1+</sup> | b <sup>2+</sup> | #  | AA     | #  | y <sup>1+</sup> | y <sup>2+</sup> |
|---------|-----------------|-----------------|----|--------|----|-----------------|-----------------|
|         | 58.0287         | 29.5180         | 1  | G      | 16 |                 |                 |
|         | 115.0502        | 58.0287         | 2  | G      | 15 | 1649.6204       | 825.3138        |
|         | 186.0873        | 93.5473         | 3  | A      | 14 | 1592.5989       | 796.8031        |
|         | 315.1299        | 158.0686        | 4  | E      | 13 | 1521.5618       | 761.2845        |
|         | 429.1728        | 215.0901        | 5  | N      | 12 | 1392.5192       | 696.7633        |
|         | 543.2158        | 272.1115        | 6  | N      | 11 | 1278.4763       | 639.7418        |
|         | 644.2634        | 322.6354        | 7  | T      | 10 | 1164.4334       | 582.7203        |
|         | 731.2955        | 366.1514        | 8  | S      | 9  | 1063.3857       | 532.1965        |
|         | 802.3326        | 401.6699        | 9  | A      | 8  | 976.3537        | 488.6805        |
|         | 969.3309        | 485.1691        | 10 | S[167] | 7  | 905.3165        | 453.1619        |
|         | 1150.3450       | 575.6761        | 11 | T[181] | 6  | 738.3182        | 369.6627        |
|         | 1263.4290       | 632.2181        | 12 | L      | 5  | 557.3042        | 279.1557        |
|         | 1360.4818       | 680.7445        | 13 | P      | 4  | 444.2201        | 222.6137        |
|         | 1417.5032       | 709.2553        | 14 | G      | 3  | 347.1673        | 174.0873        |
|         | 1532.5302       | 766.7687        | 15 | D      | 2  | 290.1459        | 145.5766        |
|         |                 |                 | 16 | R      | 1  | 175.1190        | 88.0631         |

# Annotated spectra from Saleem et. al. 2009

K.GGSAK<sub>136</sub>GDAK<sub>136</sub>GDIY<sub>243</sub>K<sub>136</sub>I/3

0.636

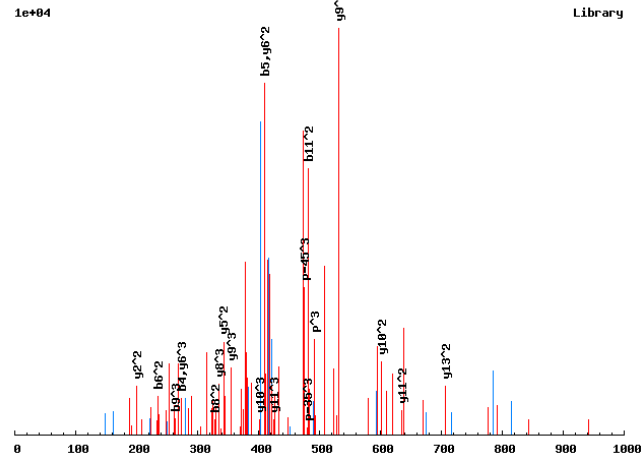

| Library | b <sup>1+</sup> | b <sup>2+</sup> | b <sup>3+</sup> | #  | AA     | #  | y <sup>1+</sup> | y <sup>2+</sup> | y <sup>3+</sup> |
|---------|-----------------|-----------------|-----------------|----|--------|----|-----------------|-----------------|-----------------|
|         | 58.0287         | 29.5180         | 20.0144         | 1  | G      | 14 |                 |                 |                 |
|         | 115.0502        | 58.0287         | 39.0216         | 2  | G      | 13 | 1413.6835       | 707.3454        | 471.8994        |
|         | 202.0822        | 101.5448        | 68.0323         | 3  | S      | 12 | 1356.6621       | 678.8347        | 452.8922        |
|         | 273.1193        | 137.0633        | 91.7113         | 4  | A      | 11 | 1269.6301       | 635.3187        | 423.8815        |
|         | 409.2285        | 205.1179        | 137.0810        | 5  | K[136] | 10 | 1198.5929       | 599.8001        | 400.2025        |
|         | 466.2500        | 233.6286        | 156.0882        | 6  | G      | 9  | 1062.4838       | 531.7455        | 354.8328        |
|         | 581.2769        | 291.1421        | 194.4305        | 7  | D      | 8  | 1005.4623       | 503.2348        | 335.8256        |
|         | 652.3140        | 326.6606        | 218.1095        | 8  | A      | 7  | 890.4354        | 445.7213        | 297.4833        |
|         | 788.4232        | 394.7152        | 263.4792        | 9  | K[136] | 6  | 819.3983        | 410.2028        | 273.8043        |
|         | 845.4446        | 423.2260        | 282.4864        | 10 | G      | 5  | 683.2891        | 342.1482        | 228.4346        |
|         | 960.4716        | 480.7394        | 320.8287        | 11 | D      | 4  | 626.2677        | 313.6375        | 209.4274        |
|         | 1073.5556       | 537.2815        | 358.5234        | 12 | I      | 3  | 511.2407        | 256.1240        | 171.0851        |
|         | 1316.5853       | 658.7963        | 439.5333        | 13 | Y[243] | 2  | 398.1567        | 199.5820        | 133.3904        |
|         |                 |                 |                 | 14 | K[136] | 1  | 155.1270        | 78.0671         | 52.3805         |

# Annotated spectra from Saleem et. al. 2009

K.GGS<sub>167</sub>LSPT<sub>181</sub>PEAFNDTR.V/2

0.8815

1e+04

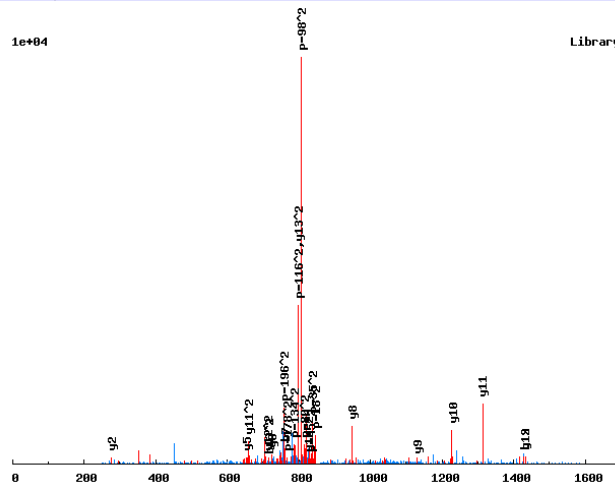

| Library | b <sup>1+</sup> | b <sup>2+</sup> | #  | AA     | #  | y <sup>1+</sup> | y <sup>2+</sup> |
|---------|-----------------|-----------------|----|--------|----|-----------------|-----------------|
|         | 58.0287         | 29.5180         | 1  | G      | 15 |                 |                 |
|         | 115.0502        | 58.0287         | 2  | G      | 14 | 1651.6401       | 826.3237        |
|         | 282.0486        | 141.5279        | 3  | S[167] | 13 | 1594.6186       | 797.8129        |
|         | 395.1326        | 198.0700        | 4  | L      | 12 | 1427.6202       | 714.3138        |
|         | 482.1647        | 241.5860        | 5  | S      | 11 | 1314.5362       | 657.7717        |
|         | 579.2174        | 290.1123        | 6  | P      | 10 | 1227.5041       | 614.2557        |
|         | 760.2314        | 380.6194        | 7  | T[181] | 9  | 1130.4514       | 565.7293        |
|         | 857.2842        | 429.1457        | 8  | P      | 8  | 949.4374        | 475.2223        |
|         | 986.3268        | 493.6670        | 9  | E      | 7  | 852.3846        | 426.6959        |
|         | 1057.3639       | 529.1856        | 10 | A      | 6  | 723.3420        | 362.1747        |
|         | 1204.4323       | 602.7198        | 11 | F      | 5  | 652.3049        | 326.6561        |
|         | 1318.4752       | 659.7413        | 12 | N      | 4  | 505.2365        | 253.1219        |
|         | 1433.5022       | 717.2547        | 13 | D      | 3  | 391.1936        | 196.1004        |
|         | 1534.5498       | 767.7786        | 14 | T      | 2  | 276.1666        | 138.5870        |
|         |                 |                 | 15 | R      | 1  | 175.1190        | 88.0631         |

# Annotated spectra from Saleem et. al. 2009

K.GGS<sub>167</sub>SLSPDK<sub>136</sub>SSLES<sub>167</sub>PTM<sub>147</sub>LK<sub>136</sub>L/2

0.9994

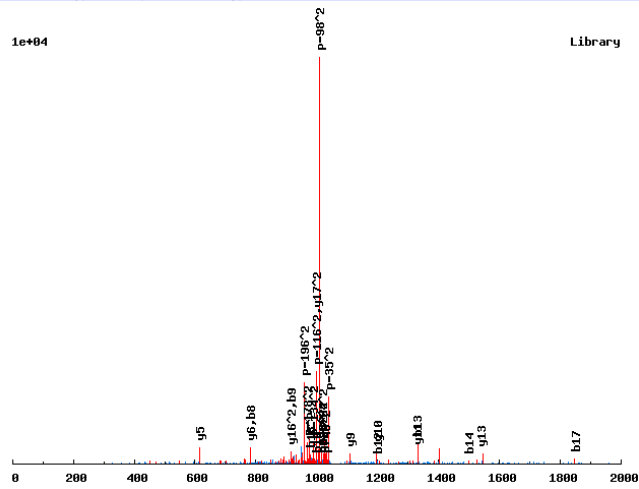

| Library | b <sup>1+</sup> | b <sup>2+</sup> | #  | AA     | #  | y <sup>1+</sup> | y <sup>2+</sup> |
|---------|-----------------|-----------------|----|--------|----|-----------------|-----------------|
|         | 58.0287         | 29.5180         | 1  | G      | 19 |                 |                 |
|         | 115.0502        | 58.0287         | 2  | G      | 18 | 2055.8928       | 1028.4500       |
|         | 282.0486        | 141.5279        | 3  | S[167] | 17 | 1998.8713       | 999.9393        |
|         | 369.0806        | 185.0439        | 4  | S      | 16 | 1831.8729       | 916.4401        |
|         | 482.1647        | 241.5860        | 5  | L      | 15 | 1744.8409       | 872.9241        |
|         | 569.1967        | 285.1020        | 6  | S      | 14 | 1631.7569       | 816.3821        |
|         | 666.2494        | 333.6284        | 7  | P      | 13 | 1544.7248       | 772.8661        |
|         | 781.2764        | 391.1418        | 8  | D      | 12 | 1447.6721       | 724.3397        |
|         | 917.3855        | 459.1964        | 9  | K[136] | 11 | 1332.6451       | 666.8262        |
|         | 1004.4176       | 502.7124        | 10 | S      | 10 | 1196.5360       | 598.7716        |
|         | 1091.4496       | 546.2284        | 11 | S      | 9  | 1109.5039       | 555.2556        |
|         | 1204.5337       | 602.7705        | 12 | L      | 8  | 1022.4719       | 511.7396        |
|         | 1333.5762       | 667.2918        | 13 | E      | 7  | 909.3879        | 455.1976        |
|         | 1500.5746       | 750.7909        | 14 | S[167] | 6  | 780.3453        | 390.6763        |
|         | 1597.6274       | 799.3173        | 15 | P      | 5  | 613.3469        | 307.1771        |
|         | 1698.6751       | 849.8412        | 16 | T      | 4  | 516.2941        | 258.6507        |
|         | 1845.7105       | 923.3589        | 17 | M[147] | 3  | 415.2465        | 208.1269        |
|         | 1958.7945       | 979.9009        | 18 | L      | 2  | 268.2111        | 134.6092        |
|         |                 |                 | 19 | K[136] | 1  | 155.1270        | 78.0671         |

### Annotated spectra from Saleem et. al. 2009

R.GHIVEK<sub>136</sub>GES<sub>167</sub>PVVK<sub>136</sub>N/3

0.859

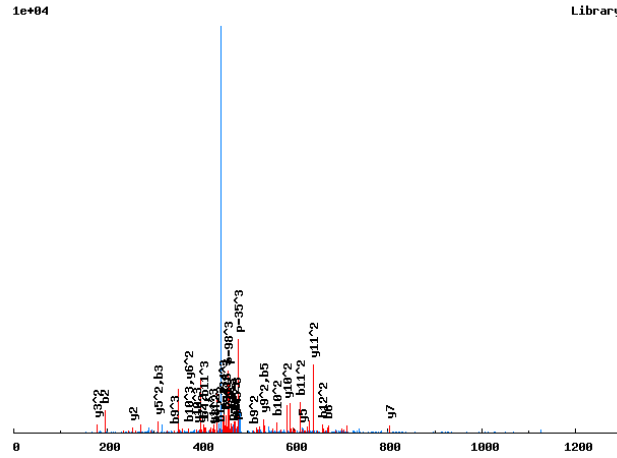

| Library | b <sup>1+</sup> | b <sup>2+</sup> | b <sup>3+</sup> | #  | AA     | #  | y <sup>1+</sup> | y <sup>2+</sup> | y <sup>3+</sup> |
|---------|-----------------|-----------------|-----------------|----|--------|----|-----------------|-----------------|-----------------|
|         | 58.0287         | 29.5180         | 20.0144         | 1  | G      | 13 |                 |                 |                 |
|         | <b>195.0876</b> | 98.0475         | 65.7007         | 2  | H      | 12 | 1417.7421       | 709.3747        | <b>473.2522</b> |
|         | <b>308.1717</b> | 154.5895        | 103.3954        | 3  | I      | 11 | 1280.6832       | <b>640.8452</b> | <b>427.5659</b> |
|         | <b>407.2401</b> | 204.1237        | 136.4182        | 4  | V      | 10 | 1167.5991       | <b>584.3032</b> | <b>389.8712</b> |
|         | <b>536.2827</b> | 268.6450        | 179.4324        | 5  | E      | 9  | 1068.5307       | <b>534.7690</b> | 356.8484        |
|         | <b>672.3919</b> | 336.6996        | 224.8021        | 6  | K[136] | 8  | 939.4881        | <b>470.2477</b> | 313.8342        |
|         | 729.4133        | 365.2103        | 243.8093        | 7  | G      | 7  | <b>803.3790</b> | <b>402.1931</b> | 268.4645        |
|         | 858.4559        | <b>429.7316</b> | 286.8235        | 8  | E      | 6  | 746.3575        | <b>373.6824</b> | 249.4574        |
|         | 1025.4543       | <b>513.2308</b> | <b>342.4896</b> | 9  | S[167] | 5  | <b>617.3149</b> | <b>309.1611</b> | 206.4432        |
|         | 1122.5070       | <b>561.7572</b> | <b>374.8405</b> | 10 | P      | 4  | <b>450.3166</b> | 225.6619        | 150.7770        |
|         | 1221.5755       | <b>611.2914</b> | <b>407.8633</b> | 11 | V      | 3  | 353.2638        | <b>177.1355</b> | 118.4261        |
|         | 1320.6439       | <b>660.8256</b> | <b>440.8861</b> | 12 | V      | 2  | <b>254.1954</b> | 127.6013        | 85.4033         |
|         |                 |                 |                 | 13 | K[136] | 1  | 155.1270        | 78.0671         | 52.3805         |



# Annotated spectra from Saleem et. al. 2009

R.GHS<sub>167</sub>,R<sub>166</sub>AS<sub>167</sub>S<sub>167</sub>FAR<sub>166</sub>T/2

0.9984

1e+04

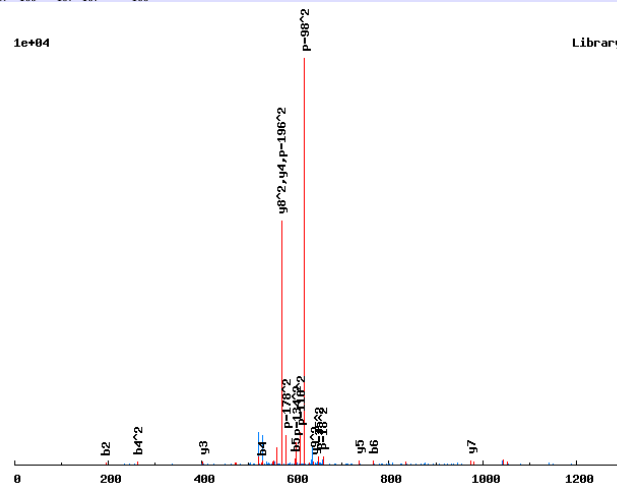

| Library | b <sup>1+</sup> | b <sup>2+</sup> | #  | AA     | #  | y <sup>1+</sup> | y <sup>2+</sup> |
|---------|-----------------|-----------------|----|--------|----|-----------------|-----------------|
|         | 58.0287         | 29.5180         | 1  | G      | 10 |                 |                 |
|         | 195.0876        | 98.0475         | 2  | H      | 9  | 1278.4332       | 639.7203        |
|         | 362.0860        | 181.5466        | 3  | S[167] | 8  | 1141.3743       | 571.1908        |
|         | 528.1954        | 264.6013        | 4  | R[166] | 7  | 974.3760        | 487.6916        |
|         | 599.2325        | 300.1199        | 5  | A      | 6  | 808.2666        | 404.6369        |
|         | 766.2309        | 383.6191        | 6  | S[167] | 5  | 737.2295        | 369.1184        |
|         | 933.2292        | 467.1183        | 7  | S[167] | 4  | 570.2311        | 285.6192        |
|         | 1080.2976       | 540.6525        | 8  | F      | 3  | 403.2327        | 202.1200        |
|         | 1151.3347       | 576.1710        | 9  | A      | 2  | 256.1643        | 128.5858        |
|         |                 |                 | 10 | R[166] | 1  | 185.1272        | 93.0672         |

### Annotated spectra from Saleem et. al. 2009

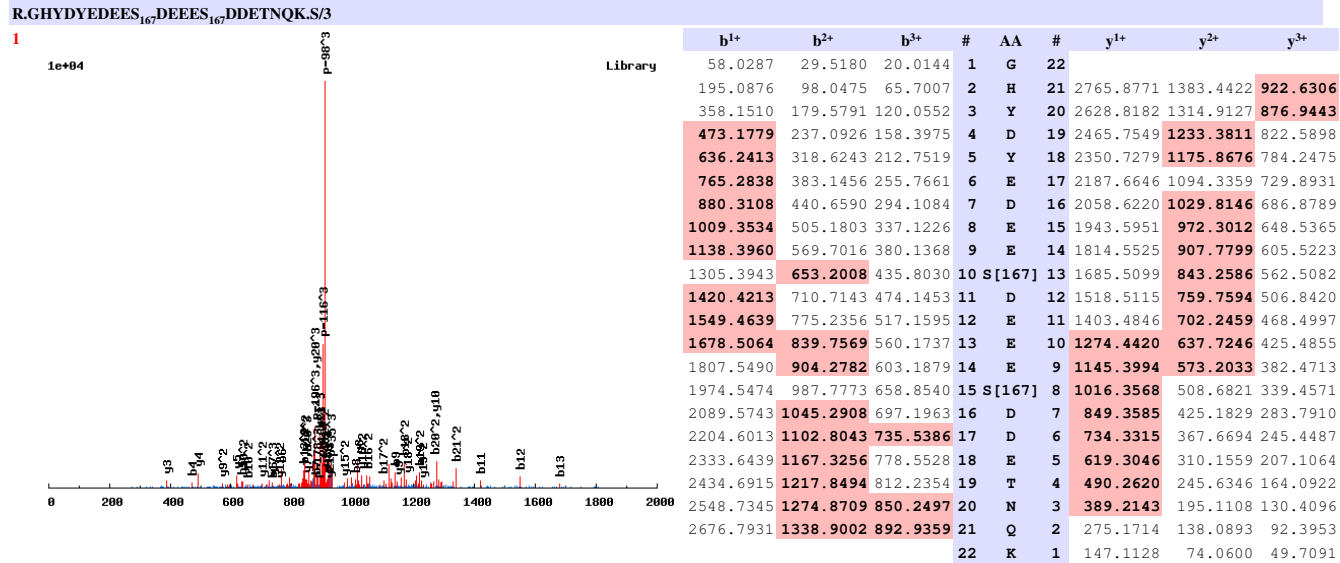

# Annotated spectra from Saleem et. al. 2009

K.GK<sub>136</sub>DNAEGQGES<sub>167</sub>LADQAR<sub>166</sub>-D/2

0.8439

1e+04

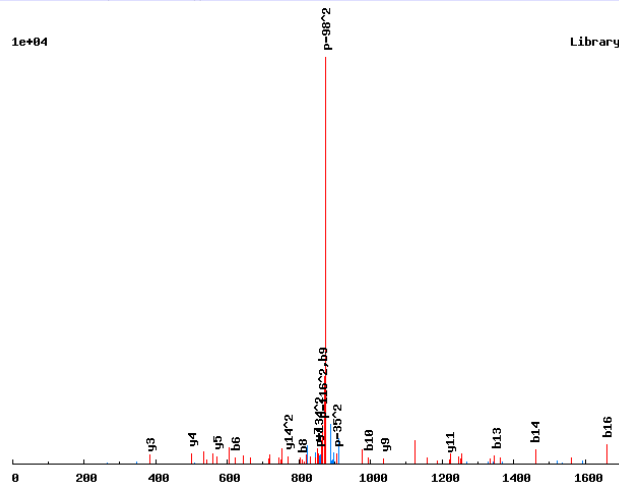

| Library | b <sup>1+</sup> | b <sup>2+</sup> | #  | AA     | #  | y <sup>1+</sup> | y <sup>2+</sup> |
|---------|-----------------|-----------------|----|--------|----|-----------------|-----------------|
|         | 58.0287         | 29.5180         | 1  | G      | 17 |                 |                 |
|         | 194.1379        | 97.5726         | 2  | K[136] | 16 | 1786.7722       | 893.8897        |
|         | 309.1648        | 155.0861        | 3  | D      | 15 | 1650.6630       | 825.8352        |
|         | 423.2078        | 212.1075        | 4  | N      | 14 | 1535.6361       | 768.3217        |
|         | 494.2449        | 247.6261        | 5  | A      | 13 | 1421.5932       | 711.3002        |
|         | 623.2875        | 312.1474        | 6  | E      | 12 | 1350.5561       | 675.7817        |
|         | 680.3089        | 340.6581        | 7  | G      | 11 | 1221.5135       | 611.2604        |
|         | 808.3675        | 404.6874        | 8  | Q      | 10 | 1164.4920       | 582.7496        |
|         | 865.3890        | 433.1981        | 9  | G      | 9  | 1036.4334       | 518.7204        |
|         | 994.4316        | 497.7194        | 10 | E      | 8  | 979.4120        | 490.2096        |
|         | 1161.4299       | 581.2186        | 11 | S[167] | 7  | 850.3694        | 425.6883        |
|         | 1274.5140       | 637.7606        | 12 | L      | 6  | 683.3710        | 342.1891        |
|         | 1345.5511       | 673.2792        | 13 | A      | 5  | 570.2870        | 285.6471        |
|         | 1460.5780       | 730.7927        | 14 | D      | 4  | 499.2498        | 250.1286        |
|         | 1588.6366       | 794.8219        | 15 | Q      | 3  | 384.2229        | 192.6151        |
|         | 1659.6737       | 830.3405        | 16 | A      | 2  | 256.1643        | 128.5858        |
|         |                 |                 | 17 | R[166] | 1  | 185.1272        | 93.0672         |

# Annotated spectra from Saleem et. al. 2009

R.GLDEDEDDGWS<sub>167</sub>DEDESNNR.V/2

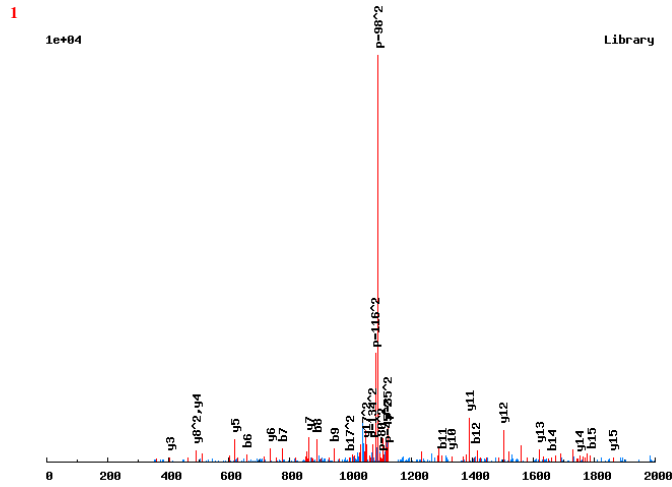

| Library | b <sup>1+</sup> | b <sup>2+</sup> | #  | AA      | #  | y <sup>1+</sup> | y <sup>2+</sup> |
|---------|-----------------|-----------------|----|---------|----|-----------------|-----------------|
|         | 58.0287         | 29.5180         | 1  | G       | 19 |                 |                 |
|         | 171.1128        | 86.0600         | 2  | L       | 18 | 2219.7520       | 1110.3797       |
|         | 286.1397        | 143.5735        | 3  | D       | 17 | 2106.6680       | 1053.8376       |
|         | 415.1823        | 208.0948        | 4  | E       | 16 | 1991.6410       | 996.3242        |
|         | 530.2093        | 265.6083        | 5  | D       | 15 | 1862.5984       | 931.8029        |
|         | 659.2519        | 330.1296        | 6  | E       | 14 | 1747.5715       | 874.2894        |
|         | 774.2788        | 387.6430        | 7  | D       | 13 | 1618.5289       | 809.7681        |
|         | 889.3057        | 445.1565        | 8  | D       | 12 | 1503.5020       | 752.2546        |
|         | 946.3272        | 473.6672        | 9  | G       | 11 | 1388.4750       | 694.7412        |
|         | 1132.4065       | 566.7069        | 10 | W       | 10 | 1331.4536       | 666.2304        |
|         | 1299.4049       | 650.2061        | 11 | S [167] | 9  | 1145.3743       | 573.1908        |
|         | 1414.4318       | 707.7195        | 12 | D       | 8  | 978.3759        | 489.6916        |
|         | 1543.4744       | 772.2408        | 13 | E       | 7  | 863.3490        | 432.1781        |
|         | 1658.5013       | 829.7543        | 14 | D       | 6  | 734.3064        | 367.6568        |
|         | 1787.5439       | 894.2756        | 15 | E       | 5  | 619.2794        | 310.1434        |
|         | 1874.5760       | 937.7916        | 16 | S       | 4  | 490.2368        | 245.6221        |
|         | 1988.6189       | 994.8131        | 17 | N       | 3  | 403.2048        | 202.1060        |
|         | 2102.6618       | 1051.8346       | 18 | N       | 2  | 289.1619        | 145.0846        |
|         |                 |                 | 19 | R       | 1  | 175.1190        | 88.0631         |

# Annotated spectra from Saleem et. al. 2009

K.GLQT<sub>181</sub>DDDEDWSTK.A/2

0.9999

1e+04

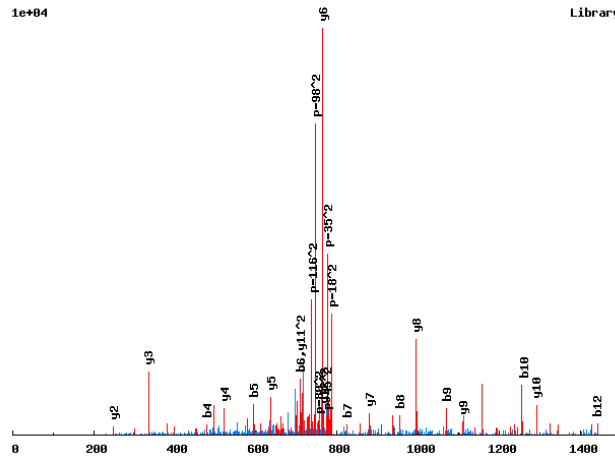

Library

| b <sup>1+</sup> | b <sup>2+</sup> | #  | AA      | #  | y <sup>1+</sup> | y <sup>2+</sup> |
|-----------------|-----------------|----|---------|----|-----------------|-----------------|
| 58.0287         | 29.5180         | 1  | G       | 13 |                 |                 |
| 171.1128        | 86.0600         | 2  | L       | 12 | 1532.5788       | 766.7931        |
| 299.1714        | 150.0893        | 3  | Q       | 11 | 1419.4948       | 710.2510        |
| 480.1854        | 240.5963        | 4  | T [181] | 10 | 1291.4362       | 646.2217        |
| 595.2123        | 298.1098        | 5  | D       | 9  | 1110.4222       | 555.7147        |
| 710.2393        | 355.6233        | 6  | D       | 8  | 995.3952        | 498.2013        |
| 825.2662        | 413.1367        | 7  | D       | 7  | 880.3683        | 440.6878        |
| 954.3088        | 477.6580        | 8  | E       | 6  | 765.3414        | 383.1743        |
| 1069.3357       | 535.1715        | 9  | D       | 5  | 636.2988        | 318.6530        |
| 1255.4151       | 628.2112        | 10 | W       | 4  | 521.2718        | 261.1396        |
| 1342.4471       | 671.7272        | 11 | S       | 3  | 335.1925        | 168.0999        |
| 1443.4948       | 722.2510        | 12 | T       | 2  | 248.1605        | 124.5839        |
|                 |                 | 13 | K       | 1  | 147.1128        | 74.0600         |

# Annotated spectra from Saleem et. al. 2009

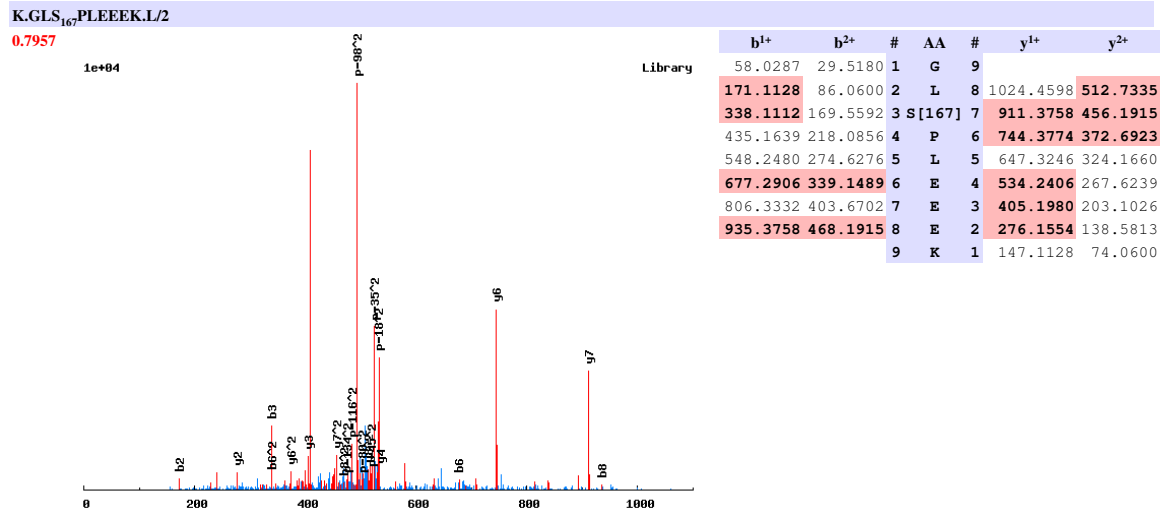

# Annotated spectra from Saleem et. al. 2009

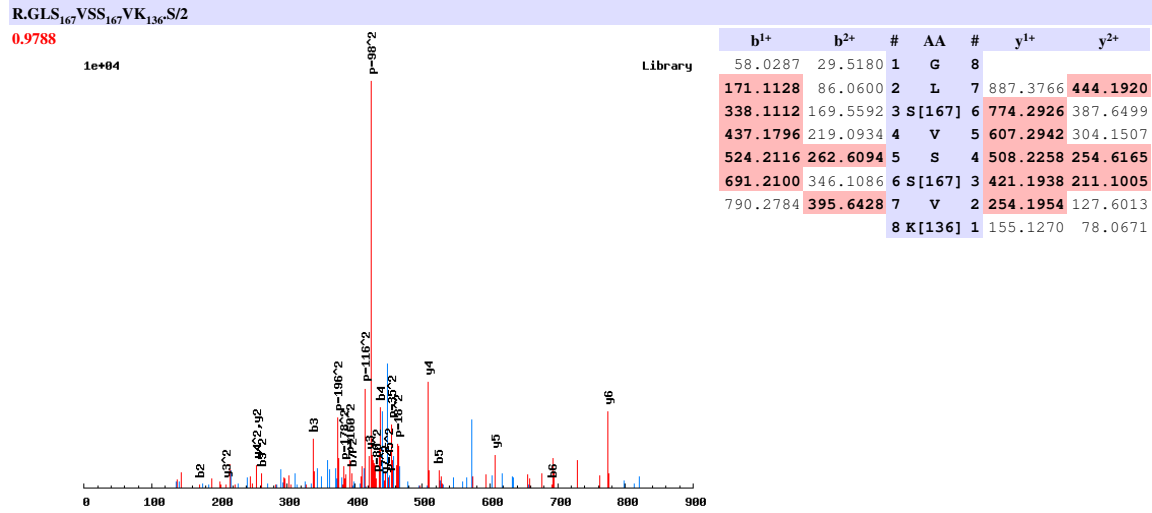

Annotated spectra from Saleem et. al. 2009

R.GMHDNNGADLDDKDYGS<sub>16</sub>EDEAVSR.S/3

0.9616

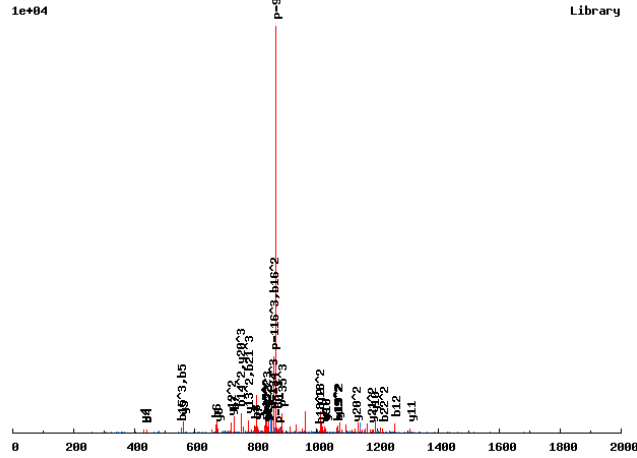

| Library | b <sup>1+</sup> | b <sup>2+</sup> | b <sup>3+</sup> | #  | AA     | #  | y <sup>1+</sup> | y <sup>2+</sup> | y <sup>3+</sup> |
|---------|-----------------|-----------------|-----------------|----|--------|----|-----------------|-----------------|-----------------|
|         | 58.0287         | 29.5180         | 20.0144         | 1  | G      | 24 |                 |                 |                 |
|         | 189.0692        | 95.0383         | 63.6946         | 2  | M      | 23 | 2633.0093       | 1317.0083       | 878.3413        |
|         | 326.1281        | 163.5677        | 109.3809        | 3  | H      | 22 | 2501.9688       | 1251.4881       | 834.6611        |
|         | 441.1551        | 221.0812        | 147.7232        | 4  | D      | 21 | 2364.9099       | 1182.9586       | 788.9748        |
|         | 555.1980        | 278.1026        | 185.7375        | 5  | N      | 20 | 2249.8830       | 1125.4451       | 750.6325        |
|         | 669.2409        | 335.1241        | 223.7518        | 6  | N      | 19 | 2135.8401       | 1068.4237       | 712.6182        |
|         | 726.2624        | 363.6348        | 242.7590        | 7  | G      | 18 | 2021.7971       | 1011.4022       | 674.6039        |
|         | 797.2995        | 399.1534        | 266.4380        | 8  | A      | 17 | 1964.7757       | 982.8915        | 655.5967        |
|         | 912.3264        | 456.6669        | 304.7803        | 9  | D      | 16 | 1893.7386       | 947.3729        | 631.9177        |
|         | 1025.4105       | 513.2089        | 342.4750        | 10 | L      | 15 | 1778.7116       | 889.8594        | 593.5754        |
|         | 1140.4374       | 570.7224        | 380.8173        | 11 | D      | 14 | 1665.6276       | 833.3174        | 555.8807        |
|         | 1255.4644       | 628.2358        | 419.1596        | 12 | D      | 13 | 1550.6006       | 775.8039        | 517.5384        |
|         | 1383.5593       | 692.2833        | 461.8580        | 13 | K      | 12 | 1435.5737       | 718.2905        | 479.1961        |
|         | 1498.5863       | 749.7968        | 500.2003        | 14 | D      | 11 | 1307.4787       | 654.2430        | 436.4978        |
|         | 1661.6496       | 831.3284        | 554.5547        | 15 | Y      | 10 | 1192.4518       | 596.7295        | 398.1554        |
|         | 1718.6711       | 859.8392        | 573.5619        | 16 | G      | 9  | 1029.3884       | 515.1979        | 343.8010        |
|         | 1885.6694       | 943.3384        | 629.2280        | 17 | S[167] | 8  | 972.3670        | 486.6871        | 324.7938        |
|         | 2014.7120       | 1007.8597       | 672.2422        | 18 | E      | 7  | 805.3686        | 403.1880        | 269.1277        |
|         | 2129.7390       | 1065.3731       | 710.5845        | 19 | D      | 6  | 676.3260        | 338.6667        | 226.1135        |
|         | 2258.7816       | 1129.8944       | 753.5987        | 20 | E      | 5  | 561.2991        | 281.1532        | 187.7712        |
|         | 2329.8187       | 1165.4130       | 777.2777        | 21 | A      | 4  | 432.2565        | 216.6319        | 144.7570        |
|         | 2428.8871       | 1214.9472       | 810.3005        | 22 | V      | 3  | 361.2194        | 181.1133        | 121.0780        |
|         | 2515.9191       | 1258.4632       | 839.3112        | 23 | S      | 2  | 262.1510        | 131.5791        | 88.0552         |
|         |                 |                 |                 | 24 | R      | 1  | 175.1190        | 88.0631         | 59.0445         |



# Annotated spectra from Saleem et. al. 2009

R.GMS<sub>167</sub>-LGSRS/2

0.9952

1e+04

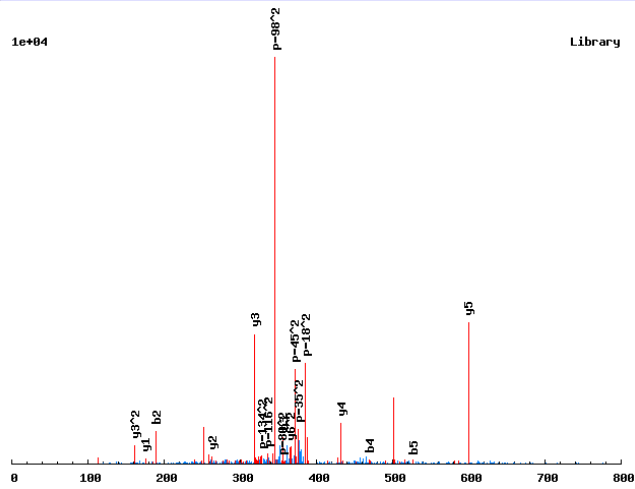

| Library | b <sup>1+</sup> | b <sup>2+</sup> | # | AA     | # | y <sup>1+</sup> | y <sup>2+</sup> |
|---------|-----------------|-----------------|---|--------|---|-----------------|-----------------|
|         | 58.0287         | 29.5180         | 1 | G      | 7 |                 |                 |
|         | 189.0692        | 95.0383         | 2 | M      | 6 | 730.2954        | 365.6513        |
|         | 356.0676        | 178.5374        | 3 | S[167] | 5 | 599.2549        | 300.1311        |
|         | 469.1517        | 235.0795        | 4 | L      | 4 | 432.2565        | 216.6319        |
|         | 526.1731        | 263.5902        | 5 | G      | 3 | 319.1724        | 160.0899        |
|         | 613.2051        | 307.1062        | 6 | S      | 2 | 262.1510        | 131.5791        |
|         |                 |                 | 7 | R      | 1 | 175.1190        | 88.0631         |

# Annotated spectra from Saleem et. al. 2009

R.GMS<sub>167</sub>-LGS<sub>167</sub>-R<sub>166</sub>-S/2

0.6337

1e+04

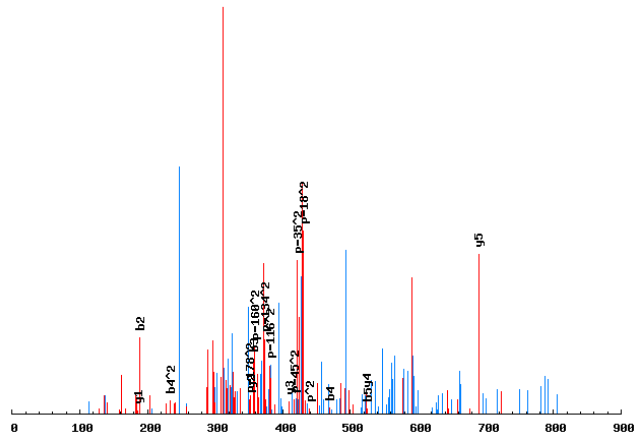

| Library | b <sup>1+</sup> | b <sup>2+</sup> | # | AA     | # | y <sup>1+</sup> | y <sup>2+</sup> |
|---------|-----------------|-----------------|---|--------|---|-----------------|-----------------|
|         | 58.0287         | 29.5180         | 1 | G      | 7 |                 |                 |
|         | 189.0692        | 95.0383         | 2 | M      | 6 | 820.2700        | 410.6386        |
|         | 356.0676        | 178.5374        | 3 | S[167] | 5 | 689.2295        | 345.1184        |
|         | 469.1517        | 235.0795        | 4 | L      | 4 | 522.2311        | 261.6192        |
|         | 526.1731        | 263.5902        | 5 | G      | 3 | 409.1470        | 205.0772        |
|         | 693.1715        | 347.0894        | 6 | S[167] | 2 | 352.1256        | 176.5664        |
|         |                 |                 | 7 | R[166] | 1 | 185.1272        | 93.0672         |

# Annotated spectra from Saleem et. al. 2009

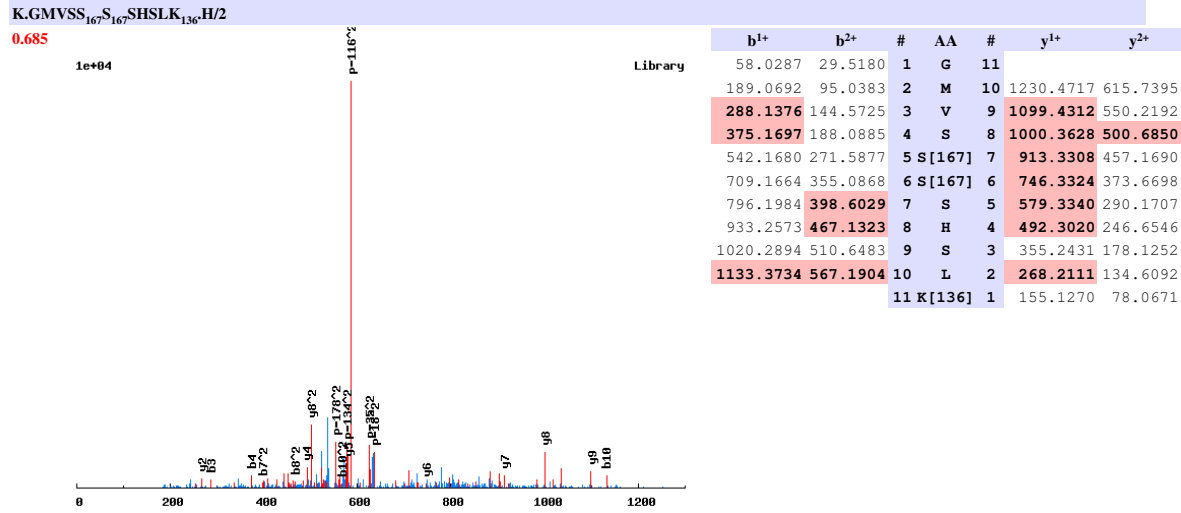

# Annotated spectra from Saleem et. al. 2009

R.GM<sub>147</sub>Y<sub>243</sub>S<sub>167</sub>S<sub>167</sub>PPGY<sub>243</sub>GS<sub>167</sub>R.V/3

0.588

1e+04

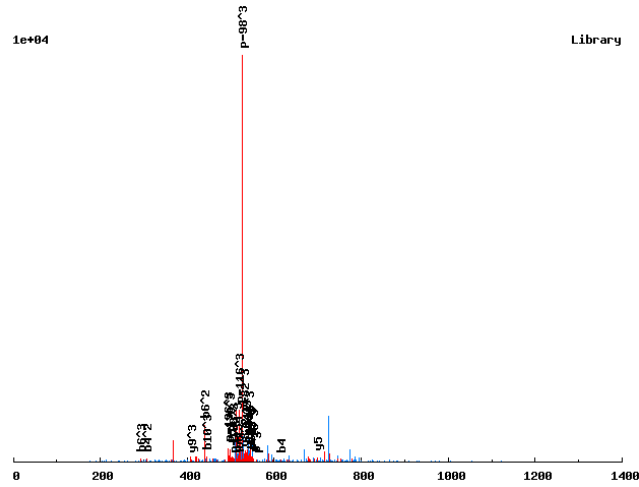

| Library | b <sup>1+</sup> | b <sup>2+</sup> | b <sup>3+</sup> | #  | AA     | #  | y <sup>1+</sup> | y <sup>2+</sup> | y <sup>3+</sup> |
|---------|-----------------|-----------------|-----------------|----|--------|----|-----------------|-----------------|-----------------|
|         | 58.0287         | 29.5180         | 20.0144         | 1  | G      | 12 |                 |                 |                 |
|         | 205.0641        | 103.0357        | 69.0262         | 2  | M[147] | 11 | 1617.3572       | 809.1822        | 539.7906        |
|         | 448.0938        | 224.5505        | 150.0361        | 3  | Y[243] | 10 | 1470.3218       | 735.6645        | 490.7788        |
|         | 615.0922        | 308.0497        | 205.7022        | 4  | S[167] | 9  | 1227.2921       | 614.1497        | 409.7689        |
|         | 782.0905        | 391.5489        | 261.3684        | 5  | S[167] | 8  | 1060.2938       | 530.6505        | 354.1028        |
|         | 879.1433        | 440.0753        | 293.7193        | 6  | P      | 7  | 893.2954        | 447.1513        | 298.4367        |
|         | 976.1960        | 488.6017        | 326.0702        | 7  | P      | 6  | 796.2427        | 398.6250        | 266.0857        |
|         | 1033.2175       | 517.1124        | 345.0774        | 8  | G      | 5  | 699.1899        | 350.0986        | 233.7348        |
|         | 1276.2472       | 638.6272        | 426.0872        | 9  | Y[243] | 4  | 642.1684        | 321.5879        | 214.7277        |
|         | 1333.2686       | 667.1380        | 445.0944        | 10 | G      | 3  | 399.1388        | 200.0730        | 133.7178        |
|         | 1500.2670       | 750.6371        | 500.7605        | 11 | S[167] | 2  | 342.1173        | 171.5623        | 114.7106        |
|         |                 |                 |                 | 12 | R      | 1  | 175.1190        | 88.0631         | 59.0445         |

# Annotated spectra from Saleem et. al. 2009

R.GNQDDGNSES<sub>167</sub>NS<sub>167</sub>MHTQPSTMAPATLR.M/3

0.9801

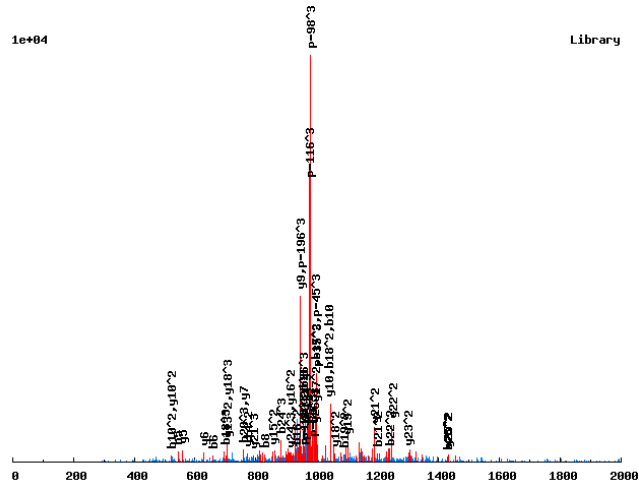

| Library | b <sup>1+</sup> | b <sup>2+</sup> | b <sup>3+</sup> | #  | AA     | #  | y <sup>1+</sup> | y <sup>2+</sup> | y <sup>3+</sup> |
|---------|-----------------|-----------------|-----------------|----|--------|----|-----------------|-----------------|-----------------|
|         | 58.0287         | 29.5180         | 20.0144         | 1  | G      | 27 |                 |                 |                 |
|         | 172.0717        | 86.5395         | 58.0287         | 2  | N      | 26 | 2977.1489       | 1489.0781       | 993.0545        |
|         | 300.1302        | 150.5688        | 100.7149        | 3  | Q      | 25 | 2863.1060       | 1432.0566       | 955.0402        |
|         | 428.1888        | 214.5981        | 143.4011        | 4  | Q      | 24 | 2735.0474       | 1368.0273       | 912.3540        |
|         | 543.2158        | 272.1115        | 181.7434        | 5  | D      | 23 | 2606.9888       | 1303.9981       | 869.6678        |
|         | 658.2427        | 329.6250        | 220.0858        | 6  | D      | 22 | 2491.9619       | 1246.4846       | 831.3255        |
|         | 715.2642        | 358.1357        | 239.0929        | 7  | G      | 21 | 2376.9350       | 1188.9711       | 792.9832        |
|         | 829.3071        | 415.1572        | 277.1072        | 8  | N      | 20 | 2319.9135       | 1160.4604       | 773.9760        |
|         | 916.3391        | 458.6732        | 306.1179        | 9  | S      | 19 | 2205.8706       | 1103.4389       | 735.9617        |
|         | 1045.3817       | 523.1945        | 349.1321        | 10 | E      | 18 | 2118.8385       | 1059.9229       | 706.9510        |
|         | 1212.3801       | 606.6937        | 404.7982        | 11 | S[167] | 17 | 1989.7959       | 995.4016        | 663.9368        |
|         | 1326.4230       | 663.7151        | 442.8125        | 12 | N      | 16 | 1822.7976       | 911.9024        | 608.2707        |
|         | 1493.4214       | 747.2143        | 498.4786        | 13 | S[167] | 15 | 1708.7547       | 854.8810        | 570.2564        |
|         | 1624.4619       | 812.7346        | 542.1588        | 14 | M      | 14 | 1541.7563       | 771.3818        | 514.5903        |
|         | 1761.5208       | 881.2640        | 587.8451        | 15 | H      | 13 | 1410.7158       | 705.8615        | 470.9101        |
|         | 1862.5685       | 931.7879        | 621.5277        | 16 | T      | 12 | 1273.6569       | 637.3321        | 425.2238        |
|         | 1990.6270       | 995.8172        | 664.2139        | 17 | Q      | 11 | 1172.6092       | 586.8082        | 391.5413        |
|         | 2087.6798       | 1044.3435       | 696.5648        | 18 | P      | 10 | 1044.5506       | 522.7790        | 348.8551        |
|         | 2174.7118       | 1087.8596       | 725.5755        | 19 | S      | 9  | 947.4979        | 474.2526        | 316.5041        |
|         | 2275.7595       | 1138.3834       | 759.2580        | 20 | T      | 8  | 860.4658        | 430.7366        | 287.4935        |
|         | 2406.8000       | 1203.9036       | 802.9382        | 21 | M      | 7  | 759.4182        | 380.2127        | 253.8109        |
|         | 2477.8371       | 1239.4222       | 826.6172        | 22 | A      | 6  | 628.3777        | 314.6925        | 210.1307        |
|         | 2574.8899       | 1287.9486       | 858.9681        | 23 | P      | 5  | 557.3406        | 279.1739        | 186.4517        |
|         | 2645.9270       | 1323.4671       | 882.6472        | 24 | A      | 4  | 460.2878        | 230.6475        | 154.1008        |
|         | 2746.9747       | 1373.9910       | 916.3297        | 25 | T      | 3  | 389.2507        | 195.1290        | 130.4217        |
|         | 2860.0587       | 1430.5330       | 954.0244        | 26 | L      | 2  | 288.2030        | 144.6051        | 96.7392         |
|         |                 |                 |                 | 27 | R      | 1  | 175.1190        | 88.0631         | 59.0445         |

# Annotated spectra from Saleem et. al. 2009

R.GNQDDGNS<sub>167</sub>ESNS<sub>167</sub>MHT<sub>181</sub>QPSTMAPATLR.M/3

0.8475

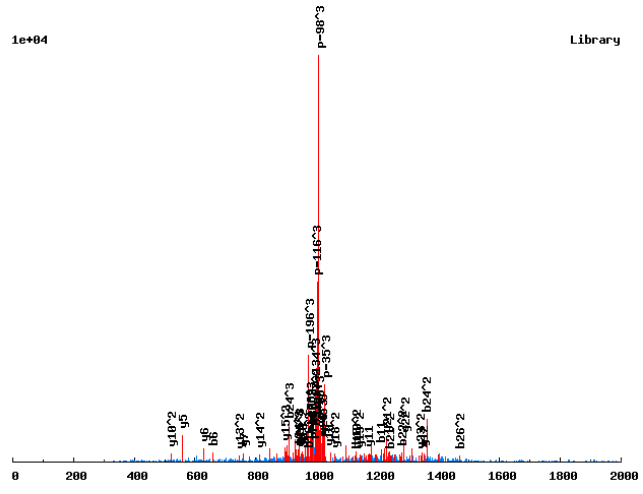

| Library | b <sup>1+</sup>  | b <sup>2+</sup>  | b <sup>3+</sup> | #  | AA     | #  | y <sup>1+</sup>  | y <sup>2+</sup>  | y <sup>3+</sup>  |
|---------|------------------|------------------|-----------------|----|--------|----|------------------|------------------|------------------|
|         | 58.0287          | 29.5180          | 20.0144         | 1  | G      | 27 |                  |                  |                  |
|         | 172.0717         | 86.5395          | 58.0287         | 2  | N      | 26 | 3057.1153        | 1529.0613        | <b>1019.7099</b> |
|         | 300.1302         | 150.5688         | 100.7149        | 3  | Q      | 25 | 2943.0723        | 1472.0398        | 981.6956         |
|         | 428.1888         | 214.5981         | 143.4011        | 4  | Q      | 24 | 2815.0137        | 1408.0105        | <b>939.0094</b>  |
|         | 543.2158         | 272.1115         | 181.7434        | 5  | D      | 23 | 2686.9552        | <b>1343.9812</b> | 896.3232         |
|         | <b>658.2427</b>  | 329.6250         | 220.0858        | 6  | D      | 22 | 2571.9282        | <b>1286.4678</b> | 857.9809         |
|         | 715.2642         | 358.1357         | 239.0929        | 7  | G      | 21 | 2456.9013        | <b>1228.9543</b> | 819.6386         |
|         | 829.3071         | 415.1572         | 277.1072        | 8  | N      | 20 | 2399.8798        | 1200.4436        | 800.6315         |
|         | <b>996.3055</b>  | 498.6564         | 332.7733        | 9  | S[167] | 19 | 2285.8369        | <b>1143.4221</b> | 762.6172         |
|         | <b>1125.3481</b> | 563.1777         | 375.7875        | 10 | E      | 18 | 2118.8385        | <b>1059.9229</b> | 706.9510         |
|         | <b>1212.3801</b> | 606.6937         | 404.7982        | 11 | S      | 17 | 1989.7959        | <b>995.4016</b>  | 663.9368         |
|         | 1326.4230        | 663.7151         | 442.8125        | 12 | N      | 16 | 1902.7639        | <b>951.8856</b>  | 634.9262         |
|         | 1493.4214        | 747.2143         | 498.4786        | 13 | S[167] | 15 | 1788.7210        | <b>894.8641</b>  | 596.9118         |
|         | 1624.4619        | 812.7346         | 542.1588        | 14 | M      | 14 | 1621.7226        | <b>811.3650</b>  | 541.2457         |
|         | 1761.5208        | 881.2640         | 587.8451        | 15 | H      | 13 | 1490.6821        | <b>745.8447</b>  | 497.5656         |
|         | 1942.5348        | <b>971.7710</b>  | 648.1831        | 16 | T[181] | 12 | <b>1353.6232</b> | 677.3153         | 451.8793         |
|         | 2070.5934        | 1035.8003        | 690.8693        | 17 | Q      | 11 | <b>1172.6092</b> | 586.8082         | 391.5413         |
|         | 2167.6461        | 1084.3267        | 723.2202        | 18 | P      | 10 | <b>1044.5506</b> | <b>522.7790</b>  | 348.8551         |
|         | 2254.6782        | <b>1127.8427</b> | 752.2309        | 19 | S      | 9  | <b>947.4979</b>  | 474.2526         | 316.5041         |
|         | 2355.7258        | 1178.3666        | 785.9135        | 20 | T      | 8  | 860.4658         | 430.7366         | 287.4935         |
|         | 2486.7663        | <b>1243.8868</b> | 829.5936        | 21 | M      | 7  | <b>759.4182</b>  | 380.2127         | 253.8109         |
|         | 2557.8034        | <b>1279.4054</b> | 853.2727        | 22 | A      | 6  | <b>628.3777</b>  | 314.6925         | 210.1307         |
|         | 2654.8562        | 1327.9317        | 885.6236        | 23 | P      | 5  | <b>557.3406</b>  | 279.1739         | 186.4517         |
|         | 2725.8933        | <b>1363.4503</b> | <b>909.3026</b> | 24 | A      | 4  | 460.2878         | 230.6475         | 154.1008         |
|         | 2826.9410        | 1413.9741        | <b>942.9852</b> | 25 | T      | 3  | 389.2507         | 195.1290         | 130.4217         |
|         | 2940.0250        | <b>1470.5162</b> | <b>980.6799</b> | 26 | L      | 2  | 288.2030         | 144.6051         | 96.7392          |
|         |                  |                  |                 | 27 | R      | 1  | 175.1190         | 88.0631          | 59.0445          |

# Annotated spectra from Saleem et. al. 2009

R.GPMGS<sub>167</sub>STT<sub>181</sub>LHHQR<sub>166</sub>V/3

**0.9352**

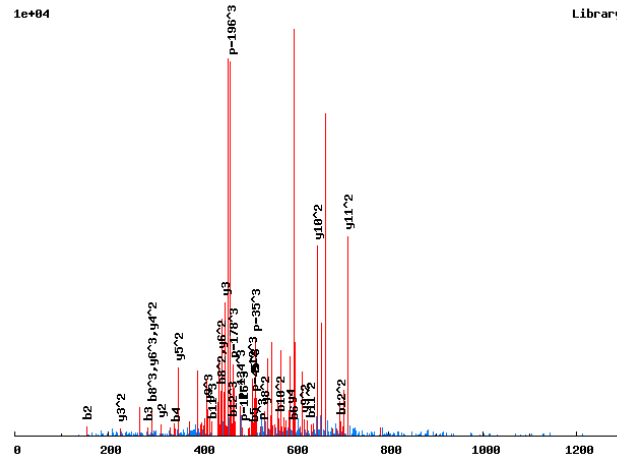

| Library | b <sup>1+</sup> | b <sup>2+</sup> | b <sup>3+</sup> | #  | AA     | #  | y <sup>1+</sup> | y <sup>2+</sup> | y <sup>3+</sup> |
|---------|-----------------|-----------------|-----------------|----|--------|----|-----------------|-----------------|-----------------|
|         | 58.0287         | 29.5180         | 20.0144         | 1  | G      | 13 |                 |                 |                 |
|         | <b>155.0815</b> | 78.0444         | 52.3654         | 2  | P      | 12 | 1521.5945       | 761.3009        | <b>507.8697</b> |
|         | <b>286.1220</b> | 143.5646        | 96.0455         | 3  | M      | 11 | 1424.5417       | <b>712.7745</b> | 475.5188        |
|         | <b>343.1434</b> | 172.0754        | 115.0527        | 4  | G      | 10 | 1293.5012       | <b>647.2543</b> | 431.8386        |
|         | <b>510.1418</b> | 255.5745        | 170.7188        | 5  | S[167] | 9  | 1236.4798       | <b>618.7435</b> | <b>412.8314</b> |
|         | <b>597.1738</b> | 299.0906        | 199.7295        | 6  | S      | 8  | 1069.4814       | <b>535.2443</b> | 357.1653        |
|         | 698.2215        | 349.6144        | 233.4120        | 7  | T      | 7  | 982.4494        | 491.7283        | 328.1546        |
|         | 879.2355        | <b>440.1214</b> | <b>293.7500</b> | 8  | T[181] | 6  | 881.4017        | <b>441.2045</b> | <b>294.4721</b> |
|         | 992.3196        | 496.6634        | 331.4447        | 9  | L      | 5  | 700.3877        | <b>350.6975</b> | 234.1341        |
|         | 1129.3785       | <b>565.1929</b> | 377.1310        | 10 | H      | 4  | <b>587.3036</b> | <b>294.1554</b> | 196.4394        |
|         | 1266.4374       | <b>633.7223</b> | <b>422.8173</b> | 11 | H      | 3  | <b>450.2447</b> | <b>225.6260</b> | 150.7531        |
|         | 1394.4960       | <b>697.7516</b> | <b>465.5035</b> | 12 | Q      | 2  | <b>313.1858</b> | 157.0965        | 105.0668        |
|         |                 |                 |                 | 13 | R[166] | 1  | 185.1272        | 93.0672         | 62.3806         |

# Annotated spectra from Saleem et. al. 2009

R.GPMHPNNS<sub>167</sub>QR<sub>166</sub>S<sub>167</sub>LQQQQQQQQQK<sub>136</sub>Q/3

0.5983

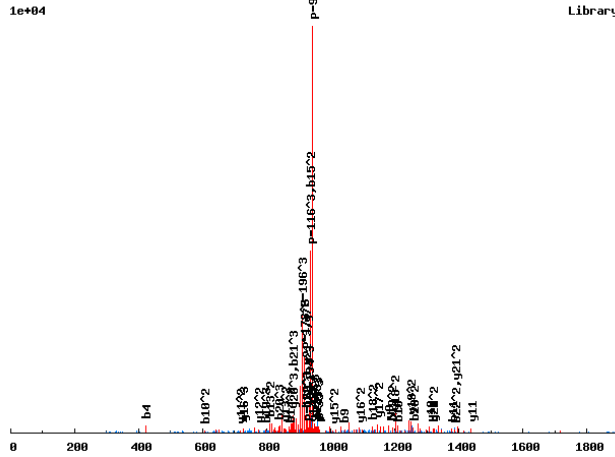

| Library | b <sup>1+</sup> | b <sup>2+</sup> | b <sup>3+</sup> | #  | AA     | #  | y <sup>1+</sup> | y <sup>2+</sup> | y <sup>3+</sup> |
|---------|-----------------|-----------------|-----------------|----|--------|----|-----------------|-----------------|-----------------|
|         | 58.0287         | 29.5180         | 20.0144         | 1  | G      | 23 |                 |                 |                 |
|         | 155.0815        | 78.0444         | 52.3654         | 2  | P      | 22 | 2867.2523       | 1434.1298       | 956.4223        |
|         | 286.1220        | 143.5646        | 96.0455         | 3  | M      | 21 | 2770.1996       | 1385.6034       | 924.0714        |
|         | 423.1809        | 212.0941        | 141.7318        | 4  | H      | 20 | 2639.1591       | 1320.0832       | 880.3912        |
|         | 520.2337        | 260.6205        | 174.0827        | 5  | P      | 19 | 2502.1002       | 1251.5537       | 834.7049        |
|         | 634.2766        | 317.6419        | 212.0971        | 6  | N      | 18 | 2405.0474       | 1203.0273       | 802.3540        |
|         | 748.3195        | 374.6634        | 250.1114        | 7  | N      | 17 | 2291.0045       | 1146.0059       | 764.3397        |
|         | 915.3179        | 458.1626        | 305.7775        | 8  | S[167] | 16 | 2176.9615       | 1088.9844       | 726.3254        |
|         | 1043.3765       | 522.1919        | 348.4637        | 9  | Q      | 15 | 2009.9632       | 1005.4852       | 670.6592        |
|         | 1209.4858       | 605.2466        | 403.8335        | 10 | R[166] | 14 | 1881.9046       | 941.4559        | 627.9731        |
|         | 1376.4842       | 688.7457        | 459.4996        | 11 | S[167] | 13 | 1715.7952       | 858.4012        | 572.6033        |
|         | 1489.5683       | 745.2878        | 497.1943        | 12 | L      | 12 | 1548.7969       | 774.9021        | 516.9371        |
|         | 1617.6268       | 809.3171        | 539.8805        | 13 | Q      | 11 | 1435.7128       | 718.3600        | 479.2425        |
|         | 1745.6854       | 873.3464        | 582.5667        | 14 | Q      | 10 | 1307.6542       | 654.3307        | 436.5563        |
|         | 1873.7440       | 937.3756        | 625.2529        | 15 | Q      | 9  | 1179.5956       | 590.3015        | 393.8701        |
|         | 2001.8026       | 1001.4049       | 667.9390        | 16 | Q      | 8  | 1051.5371       | 526.2722        | 351.1839        |
|         | 2129.8612       | 1065.4342       | 710.6252        | 17 | Q      | 7  | 923.4785        | 462.2429        | 308.4977        |
|         | 2257.9197       | 1129.4635       | 753.3114        | 18 | Q      | 6  | 795.4199        | 398.2136        | 265.8115        |
|         | 2385.9783       | 1193.4928       | 795.9976        | 19 | Q      | 5  | 667.3613        | 334.1843        | 223.1253        |
|         | 2514.0369       | 1257.5221       | 838.6838        | 20 | Q      | 4  | 539.3027        | 270.1550        | 180.4391        |
|         | 2642.0955       | 1321.5514       | 881.3700        | 21 | Q      | 3  | 411.2442        | 206.1257        | 137.7529        |
|         | 2770.1541       | 1385.5807       | 924.0562        | 22 | Q      | 2  | 283.1856        | 142.0964        | 95.0667         |
|         |                 |                 |                 | 23 | K[136] | 1  | 155.1270        | 78.0671         | 52.3805         |



# Annotated spectra from Saleem et. al. 2009

K.GPT<sub>181</sub>DS<sub>167</sub>EES<sub>167</sub>SLK.D/2

0.7054

1e+04

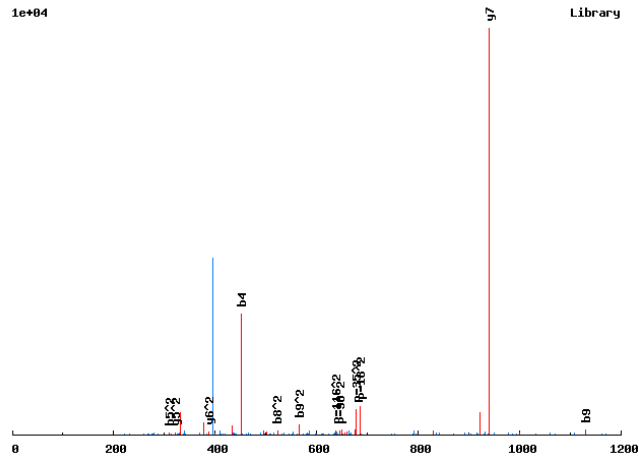

Library

| b <sup>1+</sup> | b <sup>2+</sup> | #  | AA     | #  | y <sup>1+</sup> | y <sup>2+</sup> |
|-----------------|-----------------|----|--------|----|-----------------|-----------------|
| 58.0287         | 29.5180         | 1  | G      | 11 |                 |                 |
| 155.0815        | 78.0444         | 2  | P      | 10 | 1332.4045       | 666.7059        |
| 336.0955        | 168.5514        | 3  | T[181] | 9  | 1235.3517       | 618.1795        |
| 451.1225        | 226.0649        | 4  | D      | 8  | 1054.3377       | 527.6725        |
| 618.1208        | 309.5640        | 5  | S[167] | 7  | 939.3108        | 470.1590        |
| 747.1634        | 374.0853        | 6  | E      | 6  | 772.3124        | 386.6599        |
| 876.2060        | 438.6066        | 7  | E      | 5  | 643.2698        | 322.1386        |
| 1043.2044       | 522.1058        | 8  | S[167] | 4  | 514.2273        | 257.6173        |
| 1130.2364       | 565.6218        | 9  | S      | 3  | 347.2289        | 174.1181        |
| 1243.3204       | 622.1639        | 10 | L      | 2  | 260.1969        | 130.6021        |
|                 |                 | 11 | K      | 1  | 147.1128        | 74.0600         |

# Annotated spectra from Saleem et. al. 2009

K.GQLFS<sub>167</sub>GLFVK<sub>136</sub>V/2

0.7097

1e+04

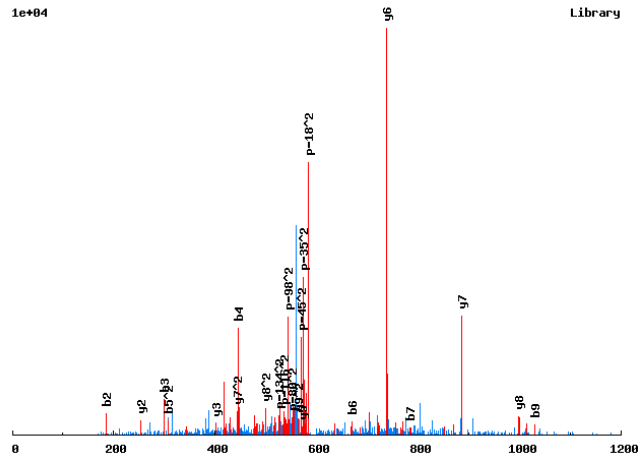

Library

| b <sup>1+</sup> | b <sup>2+</sup> | #  | AA     | #  | y <sup>1+</sup> | y <sup>2+</sup> |
|-----------------|-----------------|----|--------|----|-----------------|-----------------|
| 58.0287         | 29.5180         | 1  | G      | 10 |                 |                 |
| 186.0873        | 93.5473         | 2  | Q      | 9  | 1126.5787       | 563.7930        |
| 299.1714        | 150.0893        | 3  | L      | 8  | 998.5202        | 499.7637        |
| 446.2398        | 223.6235        | 4  | F      | 7  | 885.4361        | 443.2217        |
| 613.2382        | 307.1227        | 5  | S[167] | 6  | 738.3677        | 369.6875        |
| 670.2596        | 335.6334        | 6  | G      | 5  | 571.3693        | 286.1883        |
| 783.3437        | 392.1755        | 7  | L      | 4  | 514.3479        | 257.6776        |
| 930.4121        | 465.7097        | 8  | F      | 3  | 401.2638        | 201.1355        |
| 1029.4805       | 515.2439        | 9  | V      | 2  | 254.1954        | 127.6013        |
|                 |                 | 10 | K[136] | 1  | 155.1270        | 78.0671         |

# Annotated spectra from Saleem et. al. 2009

K.GR<sub>166</sub>DS<sub>167</sub>EISS<sub>167</sub>LVTTK<sub>136</sub>E/2

0.9973

1e+04

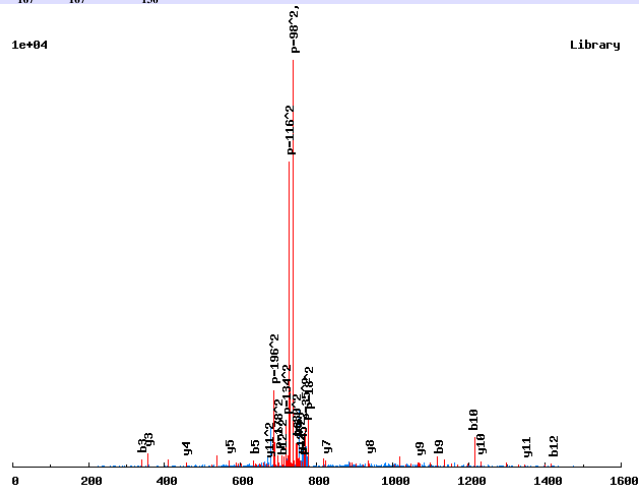

| Library | b <sup>1+</sup> | b <sup>2+</sup> | #  | AA     | #  | y <sup>1+</sup> | y <sup>2+</sup> |
|---------|-----------------|-----------------|----|--------|----|-----------------|-----------------|
|         | 58.0287         | 29.5180         | 1  | G      | 13 |                 |                 |
|         | 224.1381        | 112.5727        | 2  | R[166] | 12 | 1513.6665       | 757.3369        |
|         | 339.1651        | 170.0862        | 3  | D      | 11 | 1347.5572       | 674.2822        |
|         | 506.1634        | 253.5854        | 4  | S[167] | 10 | 1232.5302       | 616.7688        |
|         | 635.2060        | 318.1066        | 5  | E      | 9  | 1065.5319       | 533.2696        |
|         | 748.2901        | 374.6487        | 6  | I      | 8  | 936.4893        | 468.7483        |
|         | 835.3221        | 418.1647        | 7  | S      | 7  | 823.4052        | 412.2063        |
|         | 1002.3205       | 501.6639        | 8  | S[167] | 6  | 736.3732        | 368.6902        |
|         | 1115.4045       | 558.2059        | 9  | L      | 5  | 569.3748        | 285.1911        |
|         | 1214.4729       | 607.7401        | 10 | V      | 4  | 456.2908        | 228.6490        |
|         | 1315.5206       | 658.2639        | 11 | T      | 3  | 357.2224        | 179.1148        |
|         | 1416.5683       | 708.7878        | 12 | T      | 2  | 256.1747        | 128.5910        |
|         |                 |                 | 13 | K[136] | 1  | 155.1270        | 78.0671         |

Annotated spectra from Saleem et. al. 2009

R.GRGALVDS<sub>167</sub>DDE.-/2

0.9945

1e+04

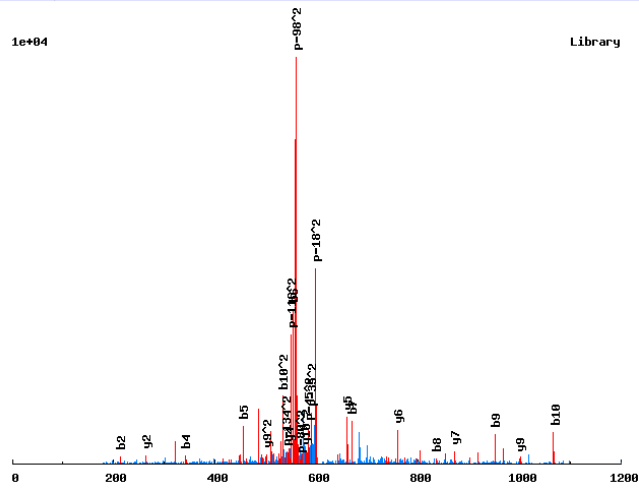

| Library | b <sup>1+</sup>  | b <sup>2+</sup> | #  | AA     | #  | y <sup>1+</sup>  | y <sup>2+</sup> |
|---------|------------------|-----------------|----|--------|----|------------------|-----------------|
|         | 58.0287          | 29.5180         | 1  | G      | 11 |                  |                 |
|         | <b>214.1299</b>  | 107.5686        | 2  | R      | 10 | 1156.4518        | <b>578.7295</b> |
|         | 271.1513         | 136.0793        | 3  | G      | 9  | <b>1000.3507</b> | <b>500.6790</b> |
|         | <b>342.1884</b>  | 171.5978        | 4  | A      | 8  | 943.3292         | 472.1682        |
|         | <b>455.2725</b>  | 228.1399        | 5  | L      | 7  | <b>872.2921</b>  | 436.6497        |
|         | <b>554.3409</b>  | 277.6741        | 6  | V      | 6  | <b>759.2080</b>  | 380.1077        |
|         | <b>669.3678</b>  | 335.1876        | 7  | D      | 5  | <b>660.1396</b>  | 330.5734        |
|         | <b>836.3662</b>  | 418.6867        | 8  | S[167] | 4  | <b>545.1127</b>  | 273.0600        |
|         | <b>951.3931</b>  | 476.2002        | 9  | D      | 3  | 378.1143         | 189.5608        |
|         | <b>1066.4201</b> | <b>533.7137</b> | 10 | D      | 2  | <b>263.0874</b>  | 132.0473        |
|         |                  |                 | 11 | E      | 1  | 148.0604         | 74.5339         |

### Annotated spectra from Saleem et. al. 2009

R.GRGGYGFDS<sub>167</sub>EDEDYDYGR.S/3

0.9629

1e+04

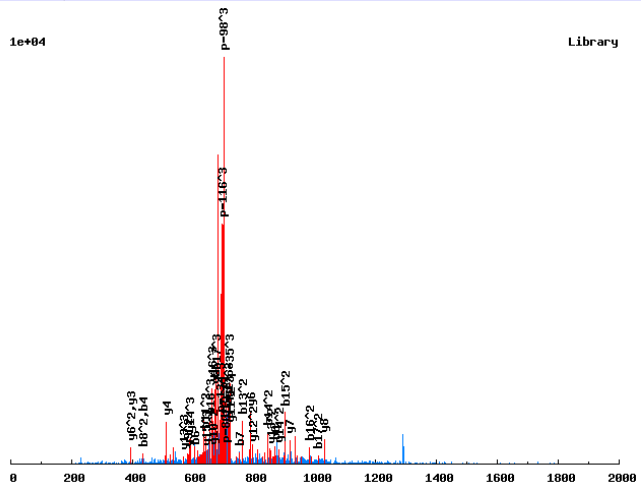

| Library | b <sup>1+</sup> | b <sup>2+</sup> | b <sup>3+</sup> | # | AA | #  | y <sup>1+</sup> | y <sup>2+</sup> | y <sup>3+</sup> |
|---------|-----------------|-----------------|-----------------|---|----|----|-----------------|-----------------|-----------------|
|         | 58.0287         | 29.5180         | 20.0144         | 1 | G  | 18 |                 |                 |                 |
|         | 214.1299        | 107.5686        | 72.0481         | 2 | R  | 17 | 2138.7611       | 1069.8842       | <b>713.5919</b> |
|         | 271.1513        | 136.0793        | 91.0553         | 3 | G  | 16 | 1982.6600       | 991.8336        | <b>661.5582</b> |
|         | <b>434.2146</b> | 217.6110        | 145.4097        | 4 | Y  | 15 | 1925.6385       | 963.3229        | <b>642.5510</b> |
|         | 491.2361        | 246.1217        | 164.4169        | 5 | G  | 14 | 1762.5752       | <b>881.7912</b> | <b>588.1966</b> |
|         | <b>606.2630</b> | 303.6352        | 202.7592        | 6 | D  | 13 | 1705.5537       | <b>853.2805</b> | <b>569.1894</b> |
|         | <b>753.3315</b> | 377.1694        | 251.7820        | 7 | F  | 12 | 1590.5268       | <b>795.7670</b> | 530.8471        |
|         | <b>868.3584</b> | <b>434.6828</b> | 290.1243        | 8 | D  | 11 | 1443.4584       | <b>722.2328</b> | 481.8243        |
|         | 1035.3568       | 518.1820        | 345.7904        | 9 |    |    |                 |                 |                 |



# Annotated spectra from Saleem et. al. 2009

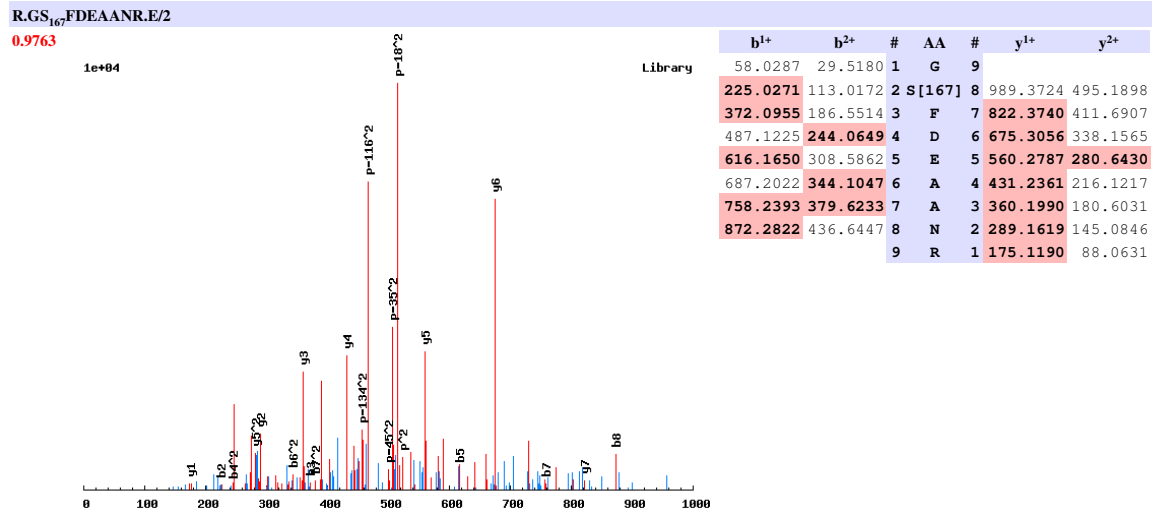

# Annotated spectra from Saleem et. al. 2009

K.GSQEST<sub>181</sub>NT<sub>181</sub>LLEEIVK<sub>136</sub>-F/2

0.9805

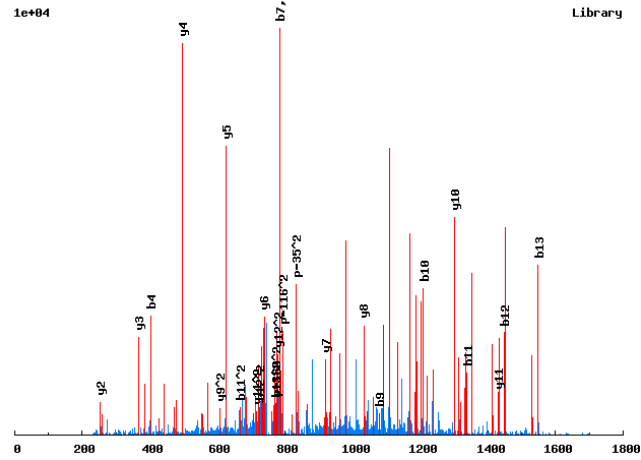

Library

| b <sup>1+</sup> | b <sup>2+</sup> | #  | AA     | #  | y <sup>1+</sup> | y <sup>2+</sup> |
|-----------------|-----------------|----|--------|----|-----------------|-----------------|
| 58.0287         | 29.5180         | 1  | G      | 14 |                 |                 |
| 145.0608        | 73.0340         | 2  | S      | 13 | 1645.6849       | 823.3461        |
| 273.1193        | 137.0633        | 3  | Q      | 12 | 1558.6529       | 779.8301        |
| 402.1619        | 201.5846        | 4  | E      | 11 | 1430.5943       | 715.8008        |
| 489.1940        | 245.1006        | 5  | S      | 10 | 1301.5517       | 651.2795        |
| 670.2080        | 335.6076        | 6  | T[181] | 9  | 1214.5197       | 607.7635        |
| 784.2509        | 392.6291        | 7  | N      | 8  | 1033.5057       | 517.2565        |
| 965.2649        | 483.1361        | 8  | T[181] | 7  | 919.4627        | 460.2350        |
| 1078.3490       | 539.6781        | 9  | L      | 6  | 738.4487        | 369.7280        |
| 1207.3916       | 604.1994        | 10 | E      | 5  | 625.3646        | 313.1860        |
| 1336.4342       | 668.7207        | 11 | E      | 4  | 496.3221        | 248.6647        |
| 1449.5182       | 725.2628        | 12 | I      | 3  | 367.2795        | 184.1434        |
| 1548.5866       | 774.7970        | 13 | V      | 2  | 254.1954        | 127.6013        |
|                 |                 | 14 | K[136] | 1  | 155.1270        | 78.0671         |



Annotated spectra from Saleem et. al. 2009

R.GS<sub>167</sub>S<sub>167</sub>DSFNLPHQISR<sub>166</sub>T/3

0.9616

1e+04

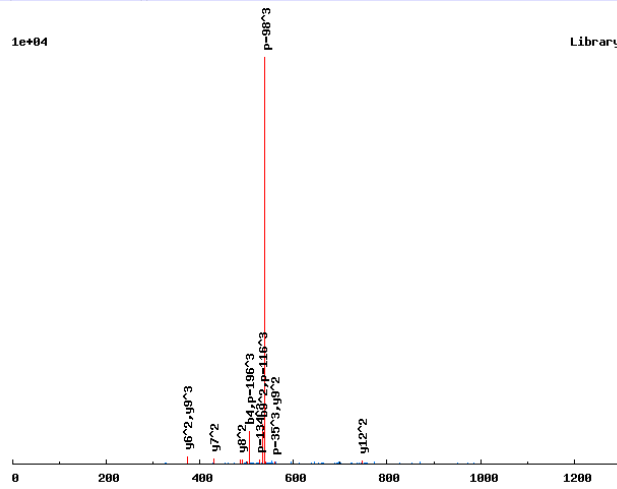

| Library | b <sup>1+</sup> | b <sup>2+</sup> | b <sup>3+</sup> | #  | AA     | #  | y <sup>1+</sup> | y <sup>2+</sup> | y <sup>3+</sup> |
|---------|-----------------|-----------------|-----------------|----|--------|----|-----------------|-----------------|-----------------|
|         | 58.0287         | 29.5180         | 20.0144         | 1  | G      | 14 |                 |                 |                 |
|         | 225.0271        | 113.0172        | 75.6806         | 2  | S[167] | 13 | 1657.6647       | 829.3360        | 553.2264        |
|         | 392.0255        | 196.5164        | 131.3467        | 3  | S[167] | 12 | 1490.6663       | 745.8368        | 497.5603        |
|         | 507.0524        | 254.0298        | 169.6890        | 4  | D      | 11 | 1323.6679       | 662.3376        | 441.8942        |
|         | 594.0844        | 297.5459        | 198.6997        | 5  | S      | 10 | 1208.6410       | 604.8241        | 403.5518        |
|         | 741.1528        | 371.0801        | 247.7225        | 6  | F      | 9  | 1121.6090       | 561.3081        | 374.5412        |
|         | 855.1958        | 428.1015        | 285.7368        | 7  | N      | 8  | 974.5405        | 487.7739        | 325.5184        |
|         | 968.2798        | 484.6436        | 323.4315        | 8  | L      | 7  | 860.4976        | 430.7524        | 287.5041        |
|         | 1065.3326       | 533.1699        | 355.7824        | 9  | P      | 6  | 747.4136        | 374.2104        | 249.8094        |
|         | 1202.3915       | 601.6994        | 401.4687        | 10 | H      | 5  | 650.3608        | 325.6840        | 217.4585        |
|         | 1330.4501       | 665.7287        | 444.1549        | 11 | Q      | 4  | 513.3019        | 257.1546        | 171.7721        |
|         | 1443.5341       | 722.2707        | 481.8496        | 12 | I      | 3  | 385.2433        | 193.1253        | 129.0860        |
|         | 1530.5662       | 765.7867        | 510.8602        | 13 | S      | 2  | 272.1592        | 136.5833        | 91.3913         |
|         |                 |                 |                 | 14 | R[166] | 1  | 185.1272        | 93.0672         | 62.3806         |

# Annotated spectra from Saleem et. al. 2009

K.GS<sub>167</sub>SMEEK.K/2

0.6778

1e+04

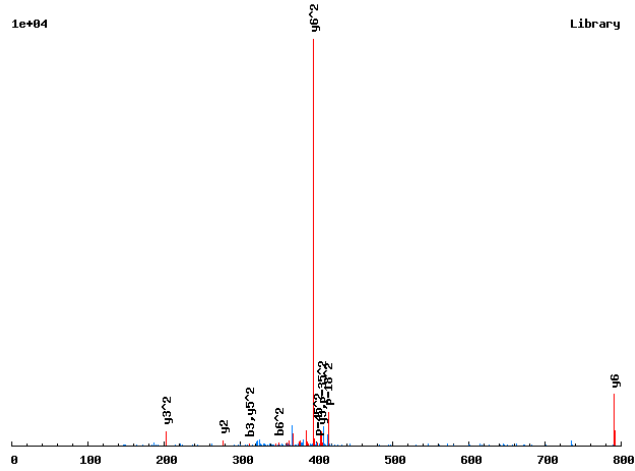

| Library | b <sup>1+</sup> | b <sup>2+</sup> | # | AA     | # | y <sup>1+</sup> | y <sup>2+</sup> |
|---------|-----------------|-----------------|---|--------|---|-----------------|-----------------|
|         | 58.0287         | 29.5180         | 1 | G      | 7 |                 |                 |
|         | 225.0271        | 113.0172        | 2 | S[167] | 6 | 790.2689        | 395.6381        |
|         | 312.0591        | 156.5332        | 3 | S      | 5 | 623.2705        | 312.1389        |
|         | 443.0996        | 222.0535        | 4 | M      | 4 | 536.2385        | 268.6229        |
|         | 572.1422        | 286.5747        | 5 | E      | 3 | 405.1980        | 203.1026        |
|         | 701.1848        | 351.0960        | 6 | E      | 2 | 276.1554        | 138.5813        |
|         |                 |                 | 7 | K      | 1 | 147.1128        | 74.0600         |

# Annotated spectra from Saleem et. al. 2009

K.GS<sub>167</sub>SR<sub>166</sub>SPS<sub>167</sub>LHSPK<sub>136</sub>S/2

0.6315

1e+04

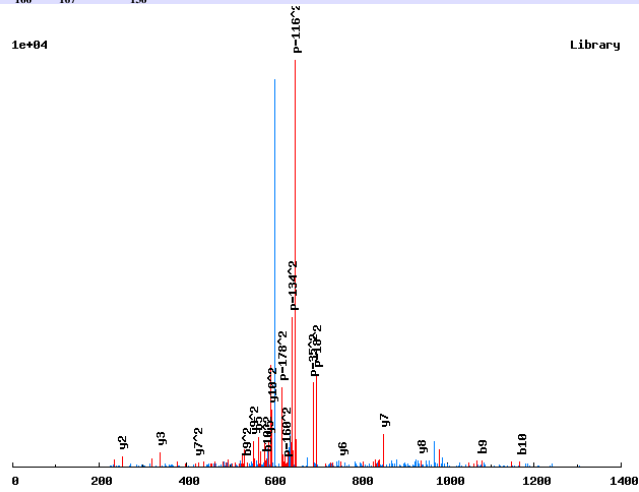

| Library | b <sup>1+</sup> | b <sup>2+</sup> | #  | AA     | #  | y <sup>1+</sup> | y <sup>2+</sup> |
|---------|-----------------|-----------------|----|--------|----|-----------------|-----------------|
|         | 58.0287         | 29.5180         | 1  | G      | 12 |                 |                 |
|         | 225.0271        | 113.0172        | 2  | S[167] | 11 | 1360.5777       | 680.7925        |
|         | 312.0591        | 156.5332        | 3  | S      | 10 | 1193.5793       | 597.2933        |
|         | 478.1685        | 239.5879        | 4  | R[166] | 9  | 1106.5473       | 553.7773        |
|         | 565.2005        | 283.1039        | 5  | S      | 8  | 940.4379        | 470.7226        |
|         | 662.2533        | 331.6303        | 6  | P      | 7  | 853.4059        | 427.2066        |
|         | 829.2517        | 415.1295        | 7  | S[167] | 6  | 756.3531        | 378.6802        |
|         | 942.3357        | 471.6715        | 8  | L      | 5  | 589.3548        | 295.1810        |
|         | 1079.3946       | 540.2010        | 9  | H      | 4  | 476.2707        | 238.6390        |
|         | 1166.4267       | 583.7170        | 10 | S      | 3  | 339.2118        | 170.1095        |
|         | 1263.4794       | 632.2434        | 11 | P      | 2  | 252.1798        | 126.5935        |
|         |                 |                 | 12 | K[136] | 1  | 155.1270        | 78.0671         |

Annotated spectra from Saleem et. al. 2009

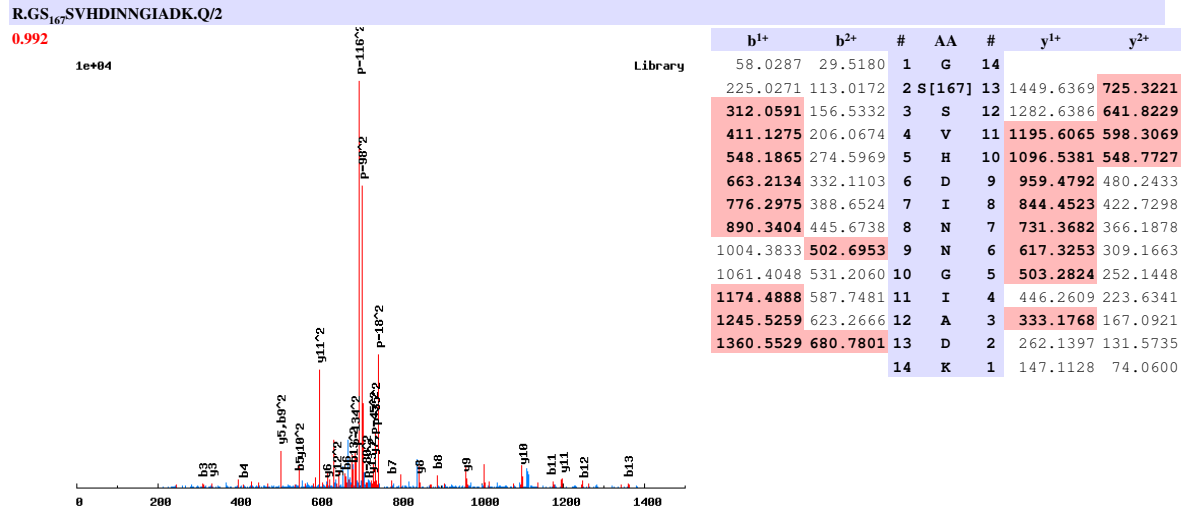

# Annotated spectra from Saleem et. al. 2009

R.GST<sub>181</sub>PC<sub>160</sub>LIGDSIR<sub>166</sub>N/2

0.6709

1e+04

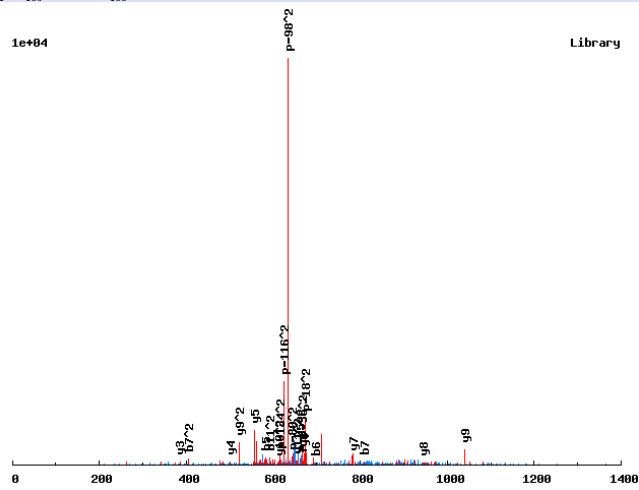

| Library | b <sup>1+</sup> | b <sup>2+</sup> | #  | AA     | #  | y <sup>1+</sup> | y <sup>2+</sup> |
|---------|-----------------|-----------------|----|--------|----|-----------------|-----------------|
|         | 58.0287         | 29.5180         | 1  | G      | 12 |                 |                 |
|         | 145.0608        | 73.0340         | 2  | S      | 11 | 1308.5893       | 654.7983        |
|         | 326.0748        | 163.5410        | 3  | T[181] | 10 | 1221.5573       | 611.2823        |
|         | 423.1275        | 212.0674        | 4  | P      | 9  | 1040.5432       | 520.7753        |
|         | 583.1582        | 292.0827        | 5  | C[160] | 8  | 943.4905        | 472.2489        |
|         | 696.2423        | 348.6248        | 6  | L      | 7  | 783.4598        | 392.2336        |
|         | 809.3263        | 405.1668        | 7  | I      | 6  | 670.3758        | 335.6915        |
|         | 866.3478        | 433.6775        | 8  | G      | 5  | 557.2917        | 279.1495        |
|         | 981.3747        | 491.1910        | 9  | D      | 4  | 500.2702        | 250.6388        |
|         | 1068.4067       | 534.7070        | 10 | S      | 3  | 385.2433        | 193.1253        |
|         | 1181.4908       | 591.2490        | 11 | I      | 2  | 298.2113        | 149.6093        |
|         |                 |                 | 12 | R[166] | 1  | 185.1272        | 93.0672         |

# Annotated spectra from Saleem et. al. 2009

R.GS<sub>167</sub>-T<sub>181</sub>-PC<sub>160</sub>-LIGDSIR<sub>166</sub>-N/2

0.9347

1e+04

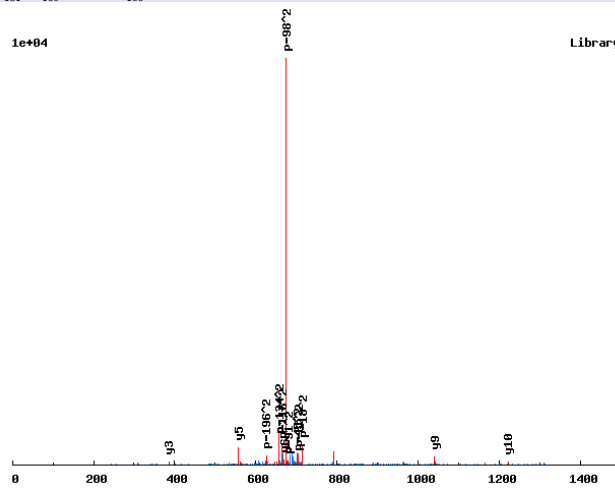

| Library | b <sup>1+</sup> | b <sup>2+</sup> | #  | AA     | #  | y <sup>1+</sup> | y <sup>2+</sup> |
|---------|-----------------|-----------------|----|--------|----|-----------------|-----------------|
|         | 58.0287         | 29.5180         | 1  | G      | 12 |                 |                 |
|         | 225.0271        | 113.0172        | 2  | S[167] | 11 | 1388.5556       | 694.7814        |
|         | 406.0411        | 203.5242        | 3  | T[181] | 10 | 1221.5573       | 611.2823        |
|         | 503.0939        | 252.0506        | 4  | P      | 9  | 1040.5432       | 520.7753        |
|         | 663.1245        | 332.0659        | 5  | C[160] | 8  | 943.4905        | 472.2489        |
|         | 776.2086        | 388.6079        | 6  | L      | 7  | 783.4598        | 392.2336        |
|         | 889.2926        | 445.1500        | 7  | I      | 6  | 670.3758        | 335.6915        |
|         | 946.3141        | 473.6607        | 8  | G      | 5  | 557.2917        | 279.1495        |
|         | 1061.3410       | 531.1742        | 9  | D      | 4  | 500.2702        | 250.6388        |
|         | 1148.3731       | 574.6902        | 10 | S      | 3  | 385.2433        | 193.1253        |
|         | 1261.4571       | 631.2322        | 11 | I      | 2  | 298.2113        | 149.6093        |
|         |                 |                 | 12 | R[166] | 1  | 185.1272        | 93.0672         |

# Annotated spectra from Saleem et. al. 2009

R.GSVY<sub>243</sub>HVPLNIVQADAVR<sub>166</sub>D/3

0.9992

1e+04

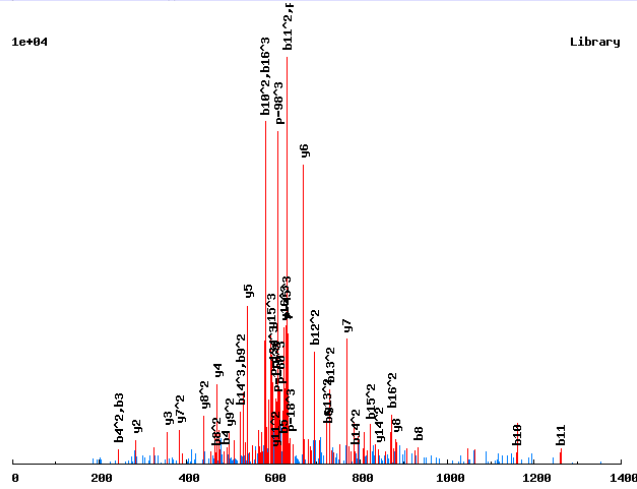

| Library | b <sup>1+</sup>  | b <sup>2+</sup> | b <sup>3+</sup> | #  | AA     | #  | y <sup>1+</sup> | y <sup>2+</sup> | y <sup>3+</sup> |
|---------|------------------|-----------------|-----------------|----|--------|----|-----------------|-----------------|-----------------|
|         | 58.0287          | 29.5180         | 20.0144         | 1  | G      | 17 |                 |                 |                 |
|         | 145.0608         | 73.0340         | 49.0251         | 2  | S      | 16 | 1870.9450       | 935.9761        | <b>624.3199</b> |
|         | <b>244.1292</b>  | 122.5682        | 82.0479         | 3  | V      | 15 | 1783.9130       | 892.4601        | <b>595.3092</b> |
|         | <b>487.1588</b>  | <b>244.0831</b> | 163.0578        | 4  | Y[243] | 14 | 1684.8446       | <b>842.9259</b> | 562.2864        |
|         | <b>624.2178</b>  | 312.6125        | 208.7441        | 5  | H      | 13 | 1441.8149       | <b>721.4111</b> | 481.2765        |
|         | <b>723.2862</b>  | 362.1467        | 241.7669        | 6  | V      | 12 | 1304.7560       | 652.8816        | 435.5902        |
|         | 820.3389         | 410.6731        | 274.1178        | 7  | P      | 11 | 1205.6876       | <b>603.3474</b> | 402.5674        |
|         | <b>933.4230</b>  | <b>467.2151</b> | 311.8125        | 8  | L      | 10 | 1108.6348       | 554.8211        | 370.2165        |
|         | 1047.4659        | <b>524.2366</b> | 349.8268        | 9  | N      | 9  | 995.5508        | <b>498.2790</b> | 332.5218        |
|         | <b>1160.5500</b> | 580.7786        | 387.5215        | 10 | I      | 8  | <b>881.5078</b> | <b>441.2576</b> | 294.5075        |
|         | <b>1259.6184</b> | <b>630.3128</b> | 420.5443        | 11 | V      | 7  | <b>768.4238</b> | <b>384.7155</b> | 256.8128        |
|         | 1387.6770        | <b>694.3421</b> | 463.2305        | 12 | Q      | 6  | <b>669.3554</b> | 335.1813        | 223.7900        |
|         | 1458.7141        | <b>729.8607</b> | 486.9095        | 13 | A      | 5  | <b>541.2968</b> | 271.1520        | 181.1038        |
|         | 1573.7410        | <b>787.3741</b> | <b>525.2519</b> | 14 | D      | 4  | <b>470.2597</b> | 235.6335        | 157.4247        |
|         | 1644.7781        | <b>822.8927</b> | 548.9309        | 15 | A      | 3  | <b>355.2327</b> | 178.1200        | 119.0824        |
|         | 1743.8465        | <b>872.4269</b> | <b>581.9537</b> | 16 | V      | 2  | <b>284.1956</b> | 142.6015        | 95.4034         |
|         |                  |                 |                 | 17 | R[166] | 1  | 185.1272        | 93.0672         | 62.3806         |

# Annotated spectra from Saleem et. al. 2009

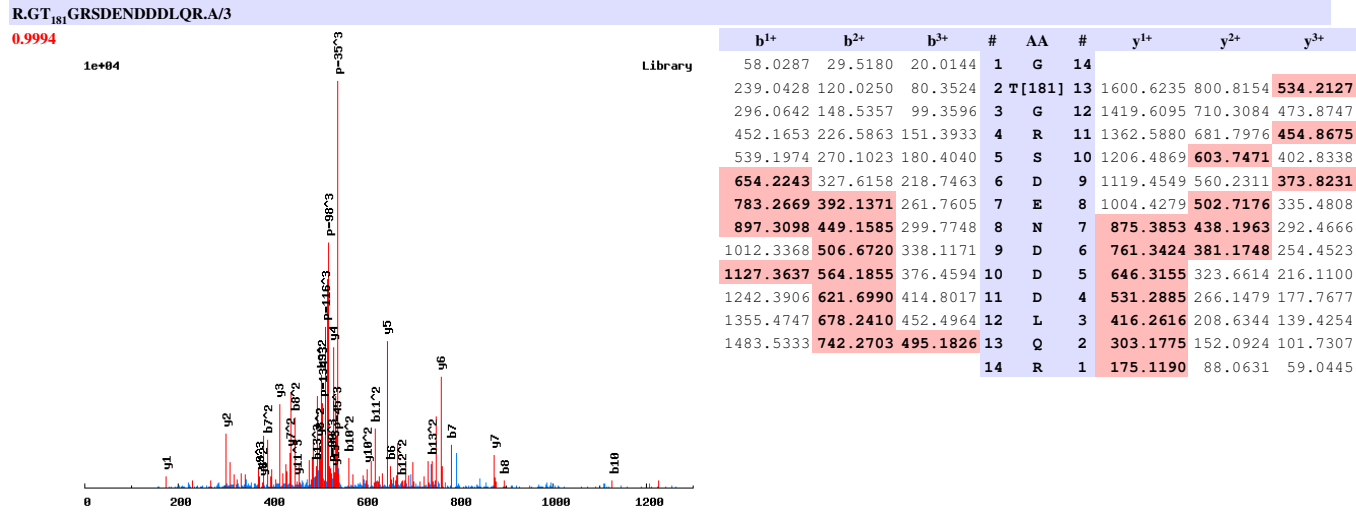



# Annotated spectra from Saleem et. al. 2009

K.GTINPS<sub>167</sub>NS<sub>167</sub>SVVPVR.V/2

0.8965

1e+04

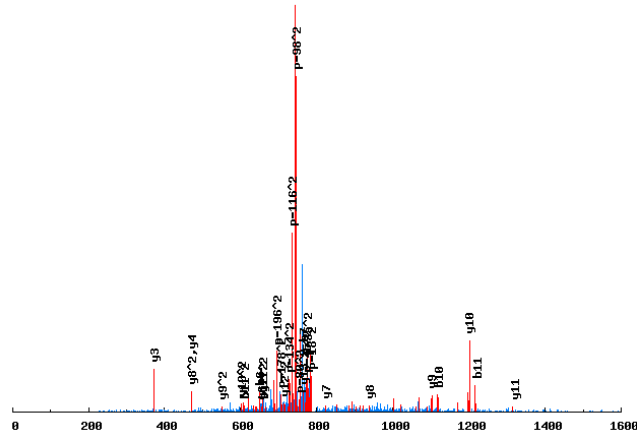

| Library | b <sup>1+</sup> | b <sup>2+</sup> | #  | AA     | #  | y <sup>1+</sup> | y <sup>2+</sup> |
|---------|-----------------|-----------------|----|--------|----|-----------------|-----------------|
|         | 58.0287         | 29.5180         | 1  | G      | 14 |                 |                 |
|         | 159.0764        | 80.0419         | 2  | T      | 13 | 1529.6761       | 765.3417        |
|         | 272.1605        | 136.5839        | 3  | I      | 12 | 1428.6284       | 714.8178        |
|         | 386.2034        | 193.6053        | 4  | N      | 11 | 1315.5443       | 658.2758        |
|         | 483.2562        | 242.1317        | 5  | P      | 10 | 1201.5014       | 601.2543        |
|         | 650.2545        | 325.6309        | 6  | S[167] | 9  | 1104.4486       | 552.7280        |
|         | 764.2975        | 382.6524        | 7  | N      | 8  | 937.4503        | 469.2288        |
|         | 931.2958        | 466.1516        | 8  | S[167] | 7  | 823.4073        | 412.2073        |
|         | 1018.3279       | 509.6676        | 9  | S      | 6  | 656.4090        | 328.7081        |
|         | 1117.3963       | 559.2018        | 10 | V      | 5  | 569.3769        | 285.1921        |
|         | 1216.4647       | 608.7360        | 11 | V      | 4  | 470.3085        | 235.6579        |
|         | 1313.5174       | 657.2624        | 12 | P      | 3  | 371.2401        | 186.1237        |
|         | 1412.5858       | 706.7966        | 13 | V      | 2  | 274.1874        | 137.5973        |
|         |                 |                 | 14 | R      | 1  | 175.1190        | 88.0631         |

# Annotated spectra from Saleem et. al. 2009

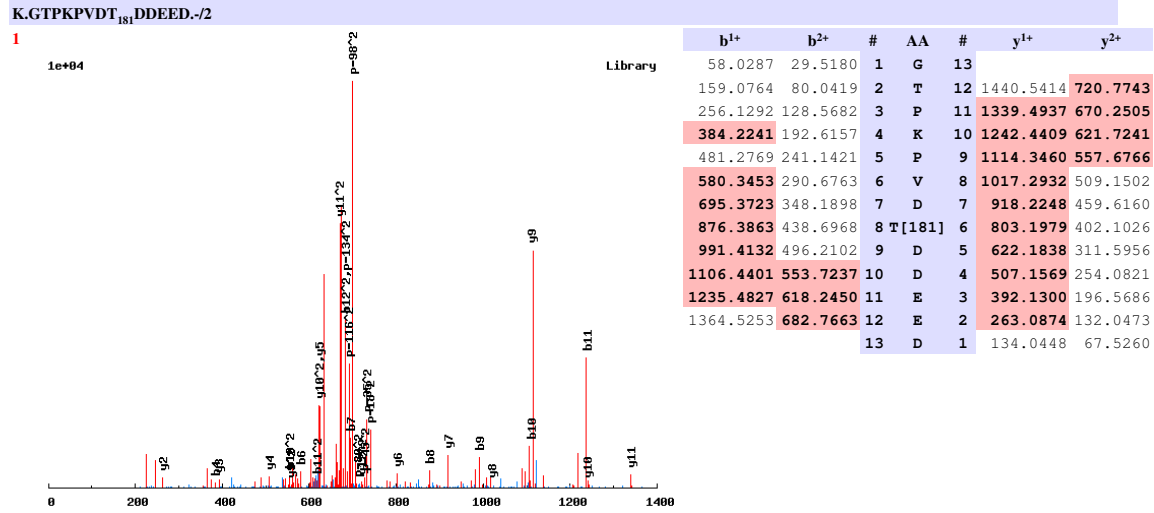

# Annotated spectra from Saleem et. al. 2009

R.GTSDS<sub>167</sub>LDS<sub>167</sub>IPEEYSHGDEVK.T/3

0.9948

1e+04

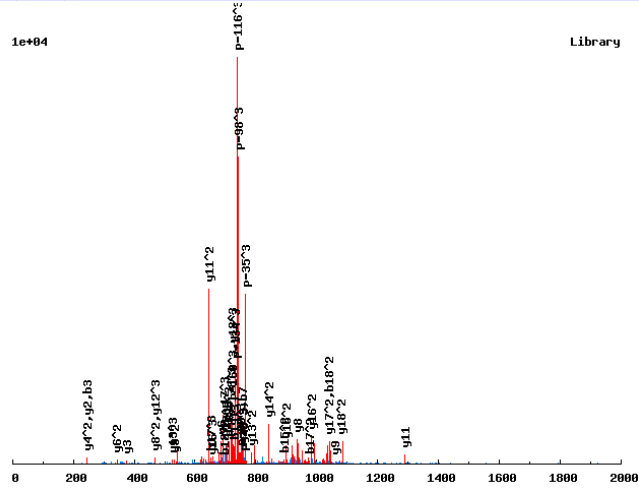

| Library | b <sup>1+</sup> | b <sup>2+</sup> | b <sup>3+</sup> | #  | AA     | #  | y <sup>1+</sup> | y <sup>2+</sup> | y <sup>3+</sup> |
|---------|-----------------|-----------------|-----------------|----|--------|----|-----------------|-----------------|-----------------|
|         | 58.0287         | 29.5180         | 20.0144         | 1  | G      | 20 |                 |                 |                 |
|         | 159.0764        | 80.0419         | 53.6970         | 2  | T      | 19 | 2267.8628       | 1134.4351       | 756.6258        |
|         | 246.1085        | 123.5579        | 82.7077         | 3  | S      | 18 | 2166.8152       | 1083.9112       | 722.9432        |
|         | 361.1354        | 181.0713        | 121.0500        | 4  | D      | 17 | 2079.7831       | 1040.3952       | 693.9326        |
|         | 528.1338        | 264.5705        | 176.7161        | 5  | S[167] | 16 | 1964.7562       | 982.8817        | 655.5903        |
|         | 641.2178        | 321.1125        | 214.4108        | 6  | L      | 15 | 1797.7578       | 899.3826        | 599.9241        |
|         | 756.2448        | 378.6260        | 252.7531        | 7  | D      | 14 | 1684.6738       | 842.8405        | 562.2294        |
|         | 923.2431        | 462.1252        | 308.4192        | 8  | S[167] | 13 | 1569.6468       | 785.3271        | 523.8871        |
|         | 1036.3272       | 518.6672        | 346.1139        | 9  | I      | 12 | 1402.6485       | 701.8279        | 468.2210        |
|         | 1133.3799       | 567.1936        | 378.4648        | 10 | P      | 11 | 1289.5644       | 645.2858        | 430.5263        |
|         | 1262.4225       | 631.7149        | 421.4790        | 11 | E      | 10 | 1192.5116       | 596.7595        | 398.1754        |
|         | 1391.4651       | 696.2362        | 464.4932        | 12 | E      | 9  | 1063.4691       | 532.2382        | 355.1612        |
|         | 1554.5284       | 777.7679        | 518.8477        | 13 | Y      | 8  | 934.4265        | 467.7169        | 312.1470        |
|         | 1641.5605       | 821.2839        | 547.8583        | 14 | S      | 7  | 771.3631        | 386.1852        | 257.7926        |
|         | 1778.6194       | 889.8133        | 593.5446        | 15 | H      | 6  | 684.3311        | 342.6692        | 228.7819        |
|         | 1835.6408       | 918.3241        | 612.5518        | 16 | G      | 5  | 547.2722        | 274.1397        | 183.0956        |
|         | 1950.6678       | 975.8375        | 650.8941        | 17 | D      | 4  | 490.2507        | 245.6290        | 164.0884        |
|         | 2079.7104       | 1040.3588       | 693.9083        | 18 | E      | 3  | 375.2238        | 188.1155        | 125.7461        |
|         | 2178.7788       | 1089.8930       | 726.9311        | 19 | V      | 2  | 246.1812        | 123.5942        | 82.7319         |
|         |                 |                 |                 | 20 | K      | 1  | 147.1128        | 74.0600         | 49.7091         |

# Annotated spectra from Saleem et. al. 2009

R.GVATT<sub>181</sub>PKS<sub>167</sub>LAVEELSGM<sub>147</sub>GFTEEEAHNALEK.C/3

0.9999

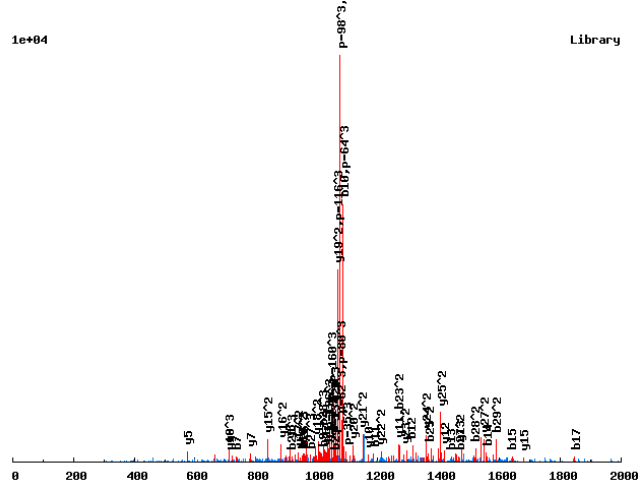

| Library | b <sup>1+</sup> | b <sup>2+</sup> | b <sup>3+</sup> | #  | AA     | #  | y <sup>1+</sup> | y <sup>2+</sup> | y <sup>3+</sup> |
|---------|-----------------|-----------------|-----------------|----|--------|----|-----------------|-----------------|-----------------|
|         | 58.0287         | 29.5180         | 20.0144         | 1  | G      | 30 |                 |                 |                 |
|         | 157.0971        | 79.0522         | 53.0372         | 2  | V      | 29 | 3264.4418       | 1632.7246       | 1088.8188       |
|         | 228.1343        | 114.5708        | 76.7163         | 3  | A      | 28 | 3165.3734       | 1583.1904       | 1055.7960       |
|         | 329.1819        | 165.0946        | 110.3988        | 4  | T      | 27 | 3094.3363       | 1547.6718       | 1032.1170       |
|         | 510.1960        | 255.6016        | 170.7368        | 5  | T[181] | 26 | 2993.2886       | 1497.1480       | 998.4344        |
|         | 607.2487        | 304.1280        | 203.0878        | 6  | P      | 25 | 2812.2746       | 1406.6410       | 938.0964        |
|         | 735.3437        | 368.1755        | 245.7861        | 7  | K      | 24 | 2715.2219       | 1358.1146       | 905.7455        |
|         | 902.3420        | 451.6747        | 301.4522        | 8  | S[167] | 23 | 2587.1269       | 1294.0671       | 863.0472        |
|         | 1015.4261       | 508.2167        | 339.1469        | 9  | L      | 22 | 2420.1285       | 1210.5679       | 807.3810        |
|         | 1086.4632       | 543.7352        | 362.8259        | 10 | A      | 21 | 2307.0445       | 1154.0259       | 769.6863        |
|         | 1185.5316       | 593.2694        | 395.8487        | 11 | V      | 20 | 2236.0074       | 1118.5073       | 746.0073        |
|         | 1314.5742       | 657.7907        | 438.8629        | 12 | E      | 19 | 2136.9390       | 1068.9731       | 712.9845        |
|         | 1443.6168       | 722.3120        | 481.8771        | 13 | E      | 18 | 2007.8964       | 1004.4518       | 669.9703        |
|         | 1556.7009       | 778.8541        | 519.5718        | 14 | L      | 17 | 1878.8538       | 939.9305        | 626.9561        |
|         | 1643.7329       | 822.3701        | 548.5825        | 15 | S      | 16 | 1765.7697       | 883.3885        | 589.2614        |
|         | 1700.7543       | 850.8808        | 567.5896        | 16 | G      | 15 | 1678.7377       | 839.8725        | 560.2508        |
|         | 1847.7897       | 924.3985        | 616.6014        | 17 | M[147] | 14 | 1621.7162       | 811.3618        | 541.2436        |
|         | 1904.8112       | 952.9092        | 635.6086        | 18 | G      | 13 | 1474.6808       | 737.8441        | 492.2318        |
|         | 2051.8796       | 1026.4434       | 684.6314        | 19 | F      | 12 | 1417.6594       | 709.3333        | 473.2246        |
|         | 2152.9273       | 1076.9673       | 718.3140        | 20 | T      | 11 | 1270.5910       | 635.7991        | 424.2018        |
|         | 2281.9699       | 1141.4886       | 761.3281        | 21 | E      | 10 | 1169.5433       | 585.2753        | 390.5193        |
|         | 2411.0125       | 1206.0099       | 804.3423        | 22 | E      | 9  | 1040.5007       | 520.7540        | 347.5051        |
|         | 2540.0551       | 1270.5312       | 847.3565        | 23 | E      | 8  | 911.4581        | 456.2327        | 304.4909        |
|         | 2611.0922       | 1306.0497       | 871.0356        | 24 | A      | 7  | 782.4155        | 391.7114        | 261.4767        |
|         | 2748.1511       | 1374.5792       | 916.7219        | 25 | H      | 6  | 711.3784        | 356.1928        | 237.7977        |
|         | 2862.1940       | 1431.6006       | 954.7362        | 26 | N      | 5  | 574.3195        | 287.6634        | 192.1114        |
|         | 2933.2311       | 1467.1192       | 978.4152        | 27 | A      | 4  | 460.2766        | 230.6419        | 154.0970        |
|         | 3046.3152       | 1523.6612       | 1016.1099       | 28 | L      | 3  | 389.2394        | 195.1234        | 130.4180        |
|         | 3175.3578       | 1588.1825       | 1059.1241       | 29 | E      | 2  | 276.1554        | 138.5813        | 92.7233         |
|         |                 |                 |                 | 30 | K      | 1  | 147.1128        | 74.0600         | 49.7091         |

# Annotated spectra from Saleem et. al. 2009

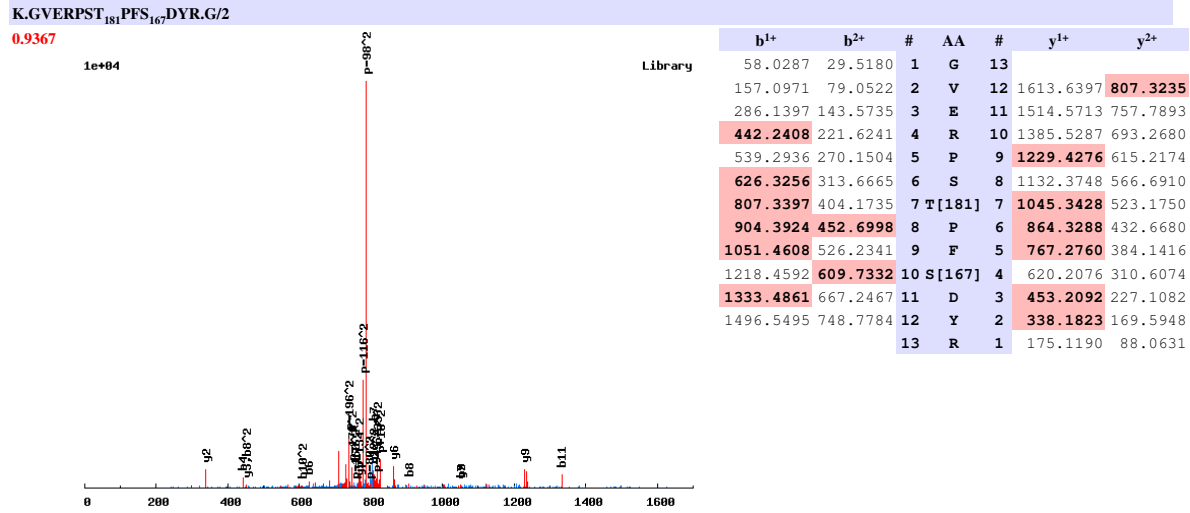

# Annotated spectra from Saleem et. al. 2009

R.GVES<sub>167</sub>PDK.N/2

0.7776

1e+04

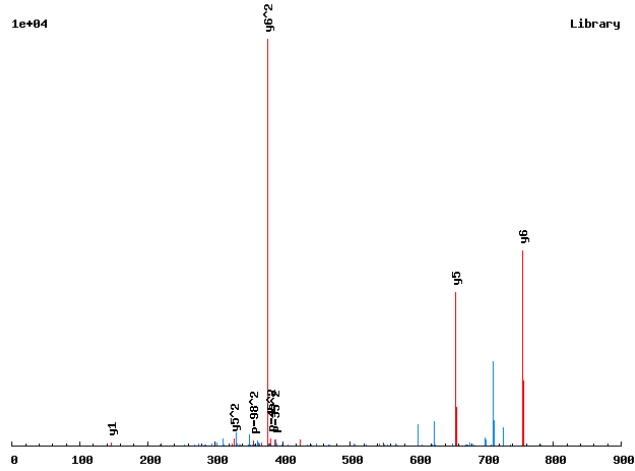

| Library | b <sup>1+</sup> | b <sup>2+</sup> | # | AA      | # | y <sup>1+</sup> | y <sup>2+</sup> |
|---------|-----------------|-----------------|---|---------|---|-----------------|-----------------|
|         | 58.0287         | 29.5180         | 1 | G       | 7 |                 |                 |
|         | 157.0971        | 79.0522         | 2 | V       | 6 | 754.3019        | 377.6546        |
|         | 286.1397        | 143.5735        | 3 | E       | 5 | 655.2335        | 328.1204        |
|         | 453.1381        | 227.0727        | 4 | S [167] | 4 | 526.1909        | 263.5991        |
|         | 550.1909        | 275.5991        | 5 | P       | 3 | 359.1925        | 180.0999        |
|         | 665.2178        | 333.1125        | 6 | D       | 2 | 262.1397        | 131.5735        |
|         |                 |                 | 7 | K       | 1 | 147.1128        | 74.0600         |

# Annotated spectra from Saleem et. al. 2009

R.GVS<sub>167</sub>-NAS<sub>167</sub>-VGSSASFGAR<sub>166</sub>/H/2

0.9999

1e+04

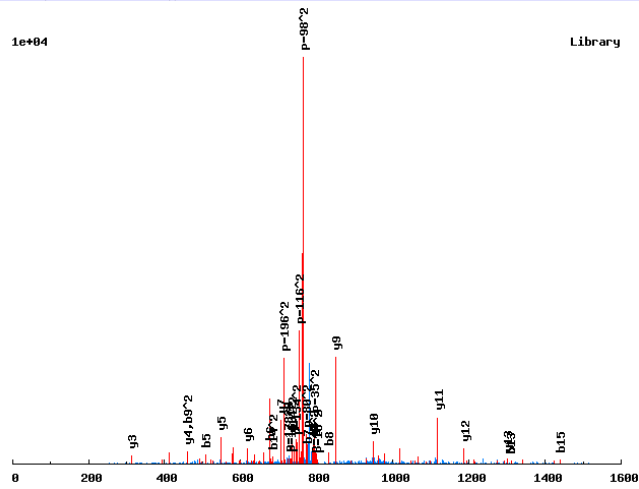

| Library | b <sup>1+</sup> | b <sup>2+</sup> | #  | AA     | #  | y <sup>1+</sup> | y <sup>2+</sup> |
|---------|-----------------|-----------------|----|--------|----|-----------------|-----------------|
|         | 58.0287         | 29.5180         | 1  | G      | 16 |                 |                 |
|         | 157.0971        | 79.0522         | 2  | V      | 15 | 1566.6224       | 783.8149        |
|         | 324.0955        | 162.5514        | 3  | S[167] | 14 | 1467.5540       | 734.2807        |
|         | 438.1384        | 219.5729        | 4  | N      | 13 | 1300.5557       | 650.7815        |
|         | 509.1756        | 255.0914        | 5  | A      | 12 | 1186.5127       | 593.7600        |
|         | 676.1739        | 338.5906        | 6  | S[167] | 11 | 1115.4756       | 558.2415        |
|         | 775.2423        | 388.1248        | 7  | V      | 10 | 948.4773        | 474.7423        |
|         | 832.2638        | 416.6355        | 8  | G      | 9  | 849.4089        | 425.2081        |
|         | 919.2958        | 460.1515        | 9  | S      | 8  | 792.3874        | 396.6973        |
|         | 1006.3278       | 503.6676        | 10 | S      | 7  | 705.3554        | 353.1813        |
|         | 1077.3650       | 539.1861        | 11 | A      | 6  | 618.3233        | 309.6653        |
|         | 1164.3970       | 582.7021        | 12 | S      | 5  | 547.2862        | 274.1468        |
|         | 1311.4654       | 656.2363        | 13 | F      | 4  | 460.2542        | 230.6307        |
|         | 1368.4869       | 684.7471        | 14 | G      | 3  | 313.1858        | 157.0965        |
|         | 1439.5240       | 720.2656        | 15 | A      | 2  | 256.1643        | 128.5858        |
|         |                 |                 | 16 | R[166] | 1  | 185.1272        | 93.0672         |

# Annotated spectra from Saleem et. al. 2009

R.GVS<sub>167</sub>VSS<sub>167</sub>VR<sub>166</sub>S/2

0.5986

1e+04

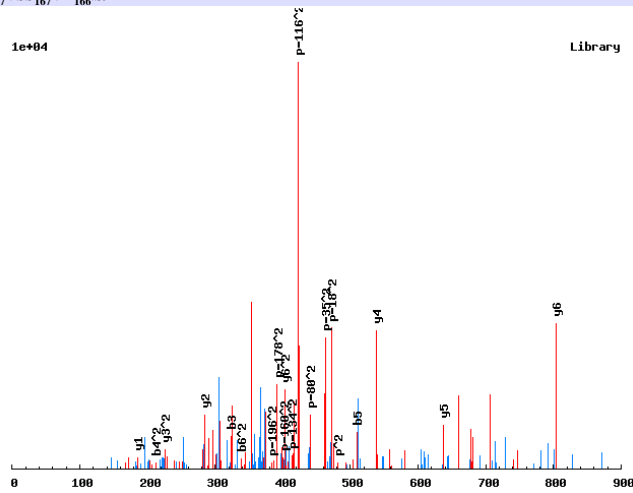

| Library | b <sup>1+</sup> | b <sup>2+</sup> | # | AA     | # | y <sup>1+</sup> | y <sup>2+</sup> |
|---------|-----------------|-----------------|---|--------|---|-----------------|-----------------|
|         | 58.0287         | 29.5180         | 1 | G      | 8 |                 |                 |
|         | 157.0971        | 79.0522         | 2 | V      | 7 | 903.3612        | 452.1842        |
|         | 324.0955        | 162.5514        | 3 | S[167] | 6 | 804.2928        | 402.6500        |
|         | 423.1639        | 212.0856        | 4 | V      | 5 | 637.2944        | 319.1509        |
|         | 510.1960        | 255.6016        | 5 | S      | 4 | 538.2260        | 269.6167        |
|         | 677.1943        | 339.1008        | 6 | S[167] | 3 | 451.1940        | 226.1006        |
|         | 776.2627        | 388.6350        | 7 | V      | 2 | 284.1956        | 142.6015        |
|         |                 |                 | 8 | R[166] | 1 | 185.1272        | 93.0672         |



# Annotated spectra from Saleem et. al. 2009

R.GYEERT<sub>181</sub>PTPT<sub>181</sub>YMAANMEYNTAQSPQTLK.S/3

0.9955

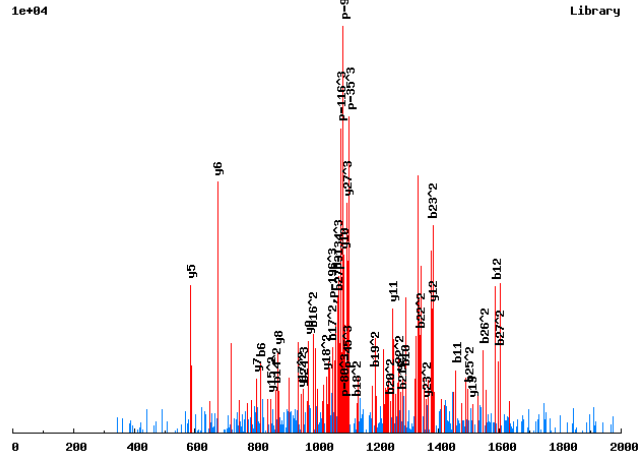

| Library | b <sup>1+</sup> | b <sup>2+</sup> | b <sup>3+</sup> | #  | AA     | #  | y <sup>1+</sup> | y <sup>2+</sup> | y <sup>3+</sup> |
|---------|-----------------|-----------------|-----------------|----|--------|----|-----------------|-----------------|-----------------|
|         | 58.0287         | 29.5180         | 20.0144         | 1  | G      | 28 |                 |                 |                 |
|         | 221.0921        | 111.0497        | 74.3689         | 2  | Y      | 27 | 3295.3724       | 1648.1899       | 1099.1290       |
|         | 350.1347        | 175.5710        | 117.3831        | 3  | E      | 26 | 3132.3091       | 1566.6582       | 1044.7746       |
|         | 479.1773        | 240.0923        | 160.3973        | 4  | E      | 25 | 3003.2665       | 1502.1369       | 1001.7604       |
|         | 635.2784        | 318.1428        | 212.4310        | 5  | R      | 24 | 2874.2239       | 1437.6156       | 958.7462        |
|         | 816.2924        | 408.6498        | 272.7690        | 6  | T[181] | 23 | 2718.1228       | 1359.5650       | 906.7125        |
|         | 913.3451        | 457.1762        | 305.1199        | 7  | P      | 22 | 2537.1088       | 1269.0580       | 846.3745        |
|         | 1014.3928       | 507.7000        | 338.8025        | 8  | T      | 21 | 2440.0560       | 1220.5317       | 814.0235        |
|         | 1111.4456       | 556.2264        | 371.1534        | 9  | P      | 20 | 2339.0084       | 1170.0078       | 780.3410        |
|         | 1292.4596       | 646.7334        | 431.4914        | 10 | T[181] | 19 | 2241.9556       | 1121.4814       | 747.9901        |
|         | 1455.5229       | 728.2651        | 485.8458        | 11 | Y      | 18 | 2060.9416       | 1030.9744       | 687.6520        |
|         | 1586.5634       | 793.7853        | 529.5260        | 12 | M      | 17 | 1897.8783       | 949.4428        | 633.2976        |
|         | 1657.6005       | 829.3039        | 553.2050        | 13 | A      | 16 | 1766.8378       | 883.9225        | 589.6174        |
|         | 1728.6376       | 864.8225        | 576.8841        | 14 | A      | 15 | 1695.8007       | 848.4040        | 565.9384        |
|         | 1842.6806       | 921.8439        | 614.8984        | 15 | N      | 14 | 1624.7635       | 812.8854        | 542.2594        |
|         | 1973.7210       | 987.3642        | 658.5785        | 16 | M      | 13 | 1510.7206       | 755.8639        | 504.2451        |
|         | 2102.7636       | 1051.8855       | 701.5927        | 17 | E      | 12 | 1379.6801       | 690.3437        | 460.5649        |
|         | 2265.8270       | 1133.4171       | 755.9472        | 18 | Y      | 11 | 1250.6375       | 625.8224        | 417.5507        |
|         | 2379.8699       | 1190.4386       | 793.9615        | 19 | N      | 10 | 1087.5742       | 544.2907        | 363.1963        |
|         | 2480.9176       | 1240.9624       | 827.6440        | 20 | T      | 9  | 973.5313        | 487.2693        | 325.1819        |
|         | 2551.9547       | 1276.4810       | 851.3231        | 21 | A      | 8  | 872.4836        | 436.7454        | 291.4994        |
|         | 2680.0133       | 1340.5103       | 894.0093        | 22 | Q      | 7  | 801.4465        | 401.2269        | 267.8204        |
|         | 2767.0453       | 1384.0263       | 923.0200        | 23 | S      | 6  | 673.3879        | 337.1976        | 225.1342        |
|         | 2864.0981       | 1432.5527       | 955.3709        | 24 | P      | 5  | 586.3559        | 293.6816        | 196.1235        |
|         | 2992.1566       | 1496.5820       | 998.0571        | 25 | Q      | 4  | 489.3031        | 245.1552        | 163.7726        |
|         | 3093.2043       | 1547.1058       | 1031.7396       | 26 | T      | 3  | 361.2445        | 181.1259        | 121.0864        |
|         | 3206.2884       | 1603.6478       | 1069.4343       | 27 | L      | 2  | 260.1969        | 130.6021        | 87.4038         |
|         |                 |                 |                 | 28 | K      | 1  | 147.1128        | 74.0600         | 49.7091         |

Annotated spectra from Saleem et. al. 2009

R.GYS<sub>167</sub>-LGHGPTHPSNMSNVDDL<sub>136</sub>M/4

0.9257

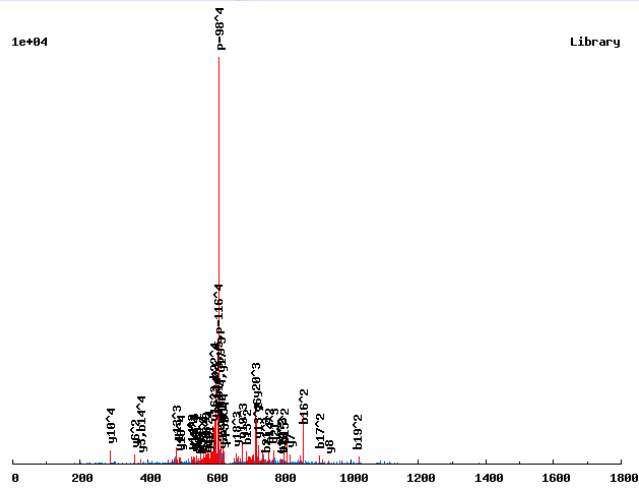

| Library | b <sup>1+</sup> | b <sup>2+</sup> | b <sup>3+</sup> | b <sup>4+</sup> | #  | AA     | #  | y <sup>1+</sup> | y <sup>2+</sup> | y <sup>3+</sup> | y <sup>4+</sup> |
|---------|-----------------|-----------------|-----------------|-----------------|----|--------|----|-----------------|-----------------|-----------------|-----------------|
|         | 58.0287         | 29.5180         | 20.0144         | 15.2626         | 1  | G      | 23 |                 |                 |                 |                 |
|         | 221.0921        | 111.0497        | 74.3689         | 56.0285         | 2  | Y      | 22 | 2481.0744       | 1241.0408       | 827.6963        | 621.0241        |
|         | 388.0904        | 194.5489        | 130.0350        | 97.7781         | 3  | S[167] | 21 | 2318.0111       | 1159.5092       | 773.3419        | 580.2582        |
|         | 501.1745        | 251.0909        | 167.7297        | 126.0491        | 4  | L      | 20 | 2151.0127       | 1076.0100       | 717.6758        | 538.5086        |
|         | 558.1960        | 279.6016        | 186.7368        | 140.3044        | 5  | G      | 19 | 2037.9286       | 1019.4680       | 679.9811        | 510.2376        |
|         | 695.2549        | 348.1311        | 232.4231        | 174.5692        | 6  | H      | 18 | 1980.9072       | 990.9572        | 660.9739        | 495.9823        |
|         | 752.2763        | 376.6418        | 251.4303        | 188.8245        | 7  | G      | 17 | 1843.8483       | 922.4278        | 615.2876        | 461.7175        |
|         | 849.3291        | 425.1682        | 283.7812        | 213.0877        | 8  | P      | 16 | 1786.8268       | 893.9170        | 596.2805        | 447.4622        |
|         | 950.3768        | 475.6920        | 317.4638        | 238.3497        | 9  | T      | 15 | 1689.7740       | 845.3907        | 563.9295        | 423.1990        |
|         | 1087.4357       | 544.2215        | 363.1501        | 272.6144        | 10 | H      | 14 | 1588.7264       | 794.8668        | 530.2470        | 397.9371        |
|         | 1184.4884       | 592.7479        | 395.5010        | 296.8776        | 11 | P      | 13 | 1451.6675       | 726.3374        | 484.5607        | 363.6723        |
|         | 1271.5205       | 636.2639        | 424.5117        | 318.6356        | 12 | S      | 12 | 1354.6147       | 677.8110        | 452.2098        | 339.4091        |
|         | 1385.5634       | 693.2853        | 462.5260        | 347.1463        | 13 | N      | 11 | 1267.5827       | 634.2950        | 423.1991        | 317.6511        |
|         | 1516.6039       | 758.8056        | 506.2061        | 379.9064        | 14 | M      | 10 | 1153.5397       | 577.2735        | 385.1848        | 289.1404        |
|         | 1603.6359       | 802.3216        | 535.2168        | 401.6644        | 15 | S      | 9  | 1022.4992       | 511.7533        | 341.5046        | 256.3803        |
|         | 1717.6788       | 859.3431        | 573.2311        | 430.1752        | 16 | N      | 8  | 935.4672        | 468.2372        | 312.4939        | 234.6223        |
|         | 1816.7473       | 908.8773        | 606.2539        | 454.9423        | 17 | V      | 7  | 821.4243        | 411.2158        | 274.4796        | 206.1115        |
|         | 1931.7742       | 966.3907        | 644.5963        | 483.6990        | 18 | D      | 6  | 722.3559        | 361.6816        | 241.4568        | 181.3444        |
|         | 2046.8011       | 1023.9042       | 682.9386        | 512.4557        | 19 | D      | 5  | 607.3289        | 304.1681        | 203.1145        | 152.5877        |
|         | 2159.8852       | 1080.4462       | 720.6333        | 540.7268        | 20 | L      | 4  | 492.3020        | 246.6546        | 164.7722        | 123.8310        |
|         | 2246.9172       | 1123.9623       | 749.6439        | 562.4848        | 21 | S      | 3  | 379.2179        | 190.1126        | 127.0775        | 95.5599         |
|         | 2383.9761       | 1192.4917       | 795.3302        | 596.7495        | 22 | H      | 2  | 292.1859        | 146.5966        | 98.0668         | 73.8019         |
|         |                 |                 |                 |                 | 23 | K[136] | 1  | 155.1270        | 78.0671         | 52.3805         | 39.5372         |

# Annotated spectra from Saleem et. al. 2009

K.HAPPPVNETDNDNQY<sub>243</sub>VQDEK<sub>136</sub>S/3

0.9118

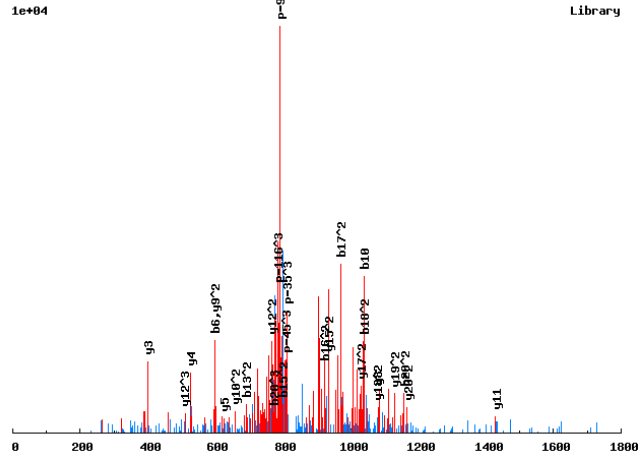

| Library | b <sup>1+</sup> | b <sup>2+</sup> | b <sup>3+</sup> | #  | AA     | #  | y <sup>1+</sup> | y <sup>2+</sup> | y <sup>3+</sup> |
|---------|-----------------|-----------------|-----------------|----|--------|----|-----------------|-----------------|-----------------|
|         | 138.0662        | 69.5367         | 46.6936         | 1  | H      | 21 |                 |                 |                 |
|         | 209.1033        | 105.0553        | 70.3726         | 2  | A      | 20 | 2330.9904       | 1165.9988       | 777.6683        |
|         | 306.1561        | 153.5817        | 102.7235        | 3  | P      | 19 | 2259.9533       | 1130.4803       | 753.9893        |
|         | 403.2088        | 202.1080        | 135.0745        | 4  | P      | 18 | 2162.9005       | 1081.9539       | 721.6384        |
|         | 500.2616        | 250.6344        | 167.4254        | 5  | P      | 17 | 2065.8477       | 1033.4275       | 689.2874        |
|         | 599.3300        | 300.1686        | 200.4482        | 6  | V      | 16 | 1968.7950       | 984.9011        | 656.9365        |
|         | 696.3828        | 348.6950        | 232.7991        | 7  | P      | 15 | 1869.7266       | 935.3669        | 623.9137        |
|         | 810.4257        | 405.7165        | 270.8134        | 8  | N      | 14 | 1772.6738       | 886.8405        | 591.5628        |
|         | 939.4683        | 470.2378        | 313.8276        | 9  | E      | 13 | 1658.6309       | 829.8191        | 553.5485        |
|         | 1040.5159       | 520.7616        | 347.5102        | 10 | T      | 12 | 1529.5883       | 765.2978        | 510.5343        |
|         | 1155.5429       | 578.2751        | 385.8525        | 11 | D      | 11 | 1428.5406       | 714.7739        | 476.8517        |
|         | 1269.5858       | 635.2966        | 423.8668        | 12 | N      | 10 | 1313.5137       | 657.2605        | 438.5094        |
|         | 1384.6128       | 692.8100        | 462.2091        | 13 | D      | 9  | 1199.4707       | 600.2390        | 400.4951        |
|         | 1471.6448       | 736.3260        | 491.2198        | 14 | S      | 8  | 1084.4438       | 542.7255        | 362.1528        |
|         | 1599.7034       | 800.3553        | 533.9060        | 15 | Q      | 7  | 997.4118        | 499.2095        | 333.1421        |
|         | 1842.7330       | 921.8702        | 614.9159        | 16 | Y[243] | 6  | 869.3532        | 435.1802        | 290.4559        |
|         | 1941.8014       | 971.4044        | 647.9387        | 17 | V      | 5  | 626.3235        | 313.6654        | 209.4460        |
|         | 2069.8600       | 1035.4337       | 690.6249        | 18 | Q      | 4  | 527.2551        | 264.1312        | 176.4232        |
|         | 2184.8870       | 1092.9471       | 728.9672        | 19 | D      | 3  | 399.1965        | 200.1019        | 133.7370        |
|         | 2313.9296       | 1157.4684       | 771.9814        | 20 | E      | 2  | 284.1696        | 142.5884        | 95.3947         |
|         |                 |                 |                 | 21 | K[136] | 1  | 155.1270        | 78.0671         | 52.3805         |

# Annotated spectra from Saleem et. al. 2009

R.HAPS<sub>167</sub>RPDS<sub>167</sub>IGR.E/2

0.9999

1e+04

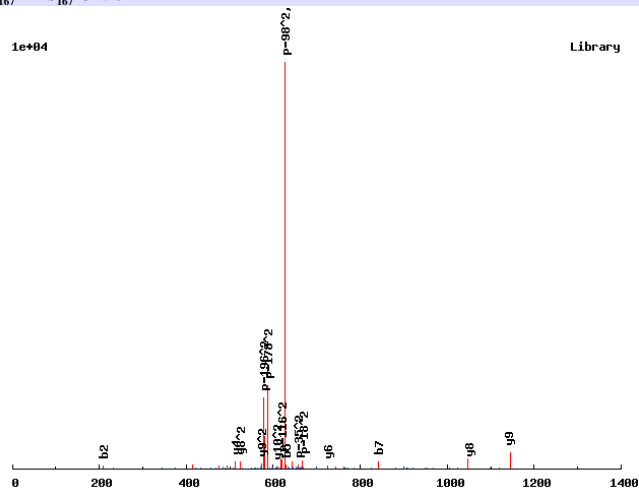

| Library | b <sup>1+</sup> | b <sup>2+</sup> | #  | AA     | #  | y <sup>1+</sup>  | y <sup>2+</sup> |
|---------|-----------------|-----------------|----|--------|----|------------------|-----------------|
|         | 138.0662        | 69.5367         | 1  | H      | 11 |                  |                 |
|         | <b>209.1033</b> | 105.0553        | 2  | A      | 10 | 1215.4919        | <b>608.2496</b> |
|         | 306.1561        | 153.5817        | 3  | P      | 9  | <b>1144.4548</b> | <b>572.7310</b> |
|         | 473.1544        | 237.0809        | 4  | S[167] | 8  | <b>1047.4020</b> | <b>524.2046</b> |
|         | <b>629.2555</b> | 315.1314        | 5  | R      | 7  | 880.4036         | 440.7055        |
|         | 726.3083        | 363.6578        | 6  | P      | 6  | <b>724.3025</b>  | 362.6549        |
|         | <b>841.3352</b> | 421.1713        | 7  | D      | 5  | <b>627.2498</b>  | 314.1285        |
|         | 1008.3336       | 504.6704        | 8  | S[167] | 4  | <b>512.2228</b>  | 256.6151        |
|         | 1121.4177       | 561.2125        | 9  | I      | 3  | 345.2245         | 173.1159        |
|         | 1178.4391       | 589.7232        | 10 | G      | 2  | 232.1404         | 116.5738        |
|         |                 |                 | 11 | R      | 1  | 175.1190         | 88.0631         |

Annotated spectra from Saleem et. al. 2009

K.HC<sub>160</sub>TISSDT<sub>181</sub>DS<sub>167</sub>DSGNAK.A/2

0.9995

1e+04

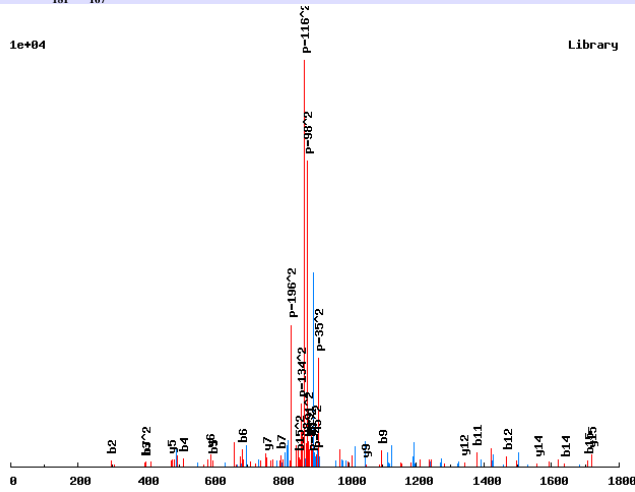

| Library | b <sup>1+</sup> | b <sup>2+</sup> | #  | AA     | #  | y <sup>1+</sup> | y <sup>2+</sup> |
|---------|-----------------|-----------------|----|--------|----|-----------------|-----------------|
|         | 138.0662        | 69.5367         | 1  | H      | 16 |                 |                 |
|         | 298.0968        | 149.5521        | 2  | C[160] | 15 | 1717.5660       | 859.2866        |
|         | 399.1445        | 200.0759        | 3  | T      | 14 | 1557.5353       | 779.2713        |
|         | 512.2286        | 256.6179        | 4  | I      | 13 | 1456.4876       | 728.7475        |
|         | 599.2606        | 300.1339        | 5  | S      | 12 | 1343.4036       | 672.2054        |
|         | 686.2926        | 343.6500        | 6  | S      | 11 | 1256.3716       | 628.6894        |
|         | 801.3196        | 401.1634        | 7  | D      | 10 | 1169.3395       | 585.1734        |
|         | 982.3336        | 491.6704        | 8  | T[181] | 9  | 1054.3126       | 527.6599        |
|         | 1097.3605       | 549.1839        | 9  | D      | 8  | 873.2986        | 437.1529        |
|         | 1264.3589       | 632.6831        | 10 | S[167] | 7  | 758.2716        | 379.6395        |
|         | 1379.3858       | 690.1966        | 11 | D      | 6  | 591.2733        | 296.1403        |
|         | 1466.4179       | 733.7126        | 12 | S      | 5  | 476.2463        | 238.6268        |
|         | 1523.4393       | 762.2233        | 13 | G      | 4  | 389.2143        | 195.1108        |
|         | 1637.4823       | 819.2448        | 14 | N      | 3  | 332.1928        | 166.6001        |
|         | 1708.5194       | 854.7633        | 15 | A      | 2  | 218.1499        | 109.5786        |
|         |                 |                 | 16 | K      | 1  | 147.1128        | 74.0600         |

# Annotated spectra from Saleem et. al. 2009

R.HDNLSS<sub>167</sub>SS<sub>167</sub>DIHYGR<sub>166</sub>N/2

0.6139

1e+04

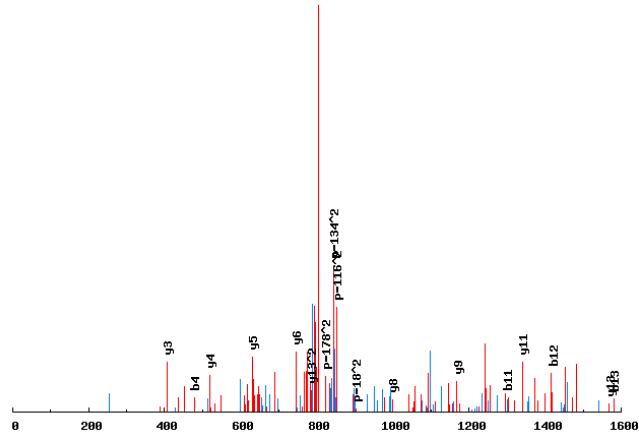

| Library | b <sup>1+</sup> | b <sup>2+</sup> | #  | AA     | #  | y <sup>1+</sup> | y <sup>2+</sup> |
|---------|-----------------|-----------------|----|--------|----|-----------------|-----------------|
|         | 138.0662        | 69.5367         | 1  | H      | 15 |                 |                 |
|         | 253.0931        | 127.0502        | 2  | D      | 14 | 1683.6538       | 842.3305        |
|         | 367.1361        | 184.0717        | 3  | N      | 13 | 1568.6269       | 784.8171        |
|         | 480.2201        | 240.6137        | 4  | L      | 12 | 1454.5839       | 727.7956        |
|         | 567.2522        | 284.1297        | 5  | S      | 11 | 1341.4999       | 671.2536        |
|         | 654.2842        | 327.6457        | 6  | S      | 10 | 1254.4679       | 627.7376        |
|         | 821.2825        | 411.1449        | 7  | S[167] | 9  | 1167.4358       | 584.2216        |
|         | 908.3146        | 454.6609        | 8  | S      | 8  | 1000.4375       | 500.7224        |
|         | 1075.3129       | 538.1601        | 9  | S[167] | 7  | 913.4054        | 457.2064        |
|         | 1190.3399       | 595.6736        | 10 | D      | 6  | 746.4071        | 373.7072        |
|         | 1303.4239       | 652.2156        | 11 | I      | 5  | 631.3801        | 316.1937        |
|         | 1416.5080       | 708.7576        | 12 | I      | 4  | 518.2961        | 259.6517        |
|         | 1579.5713       | 790.2893        | 13 | Y      | 3  | 405.2120        | 203.1096        |
|         | 1636.5928       | 818.8000        | 14 | G      | 2  | 242.1487        | 121.5780        |
|         |                 |                 | 15 | R[166] | 1  | 185.1272        | 93.0672         |

# Annotated spectra from Saleem et. al. 2009

R.HET<sub>181</sub>PLNIRPTS<sub>167</sub>PYTLNPPVER.D/3

0.9999

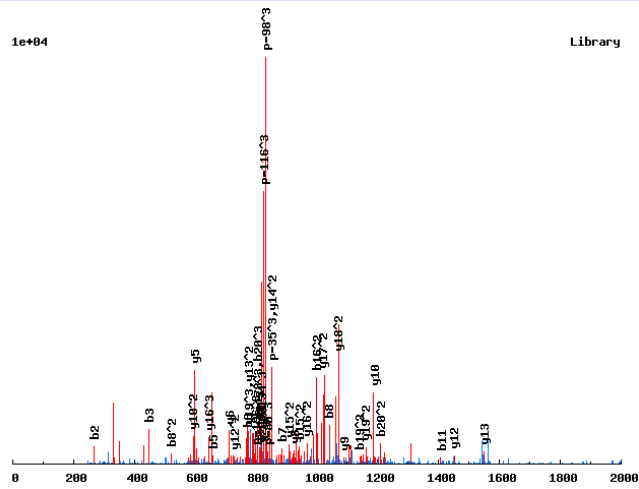

| Library | b <sup>1+</sup>  | b <sup>2+</sup>  | b <sup>3+</sup> | #  | AA     | #  | y <sup>1+</sup>  | y <sup>2+</sup>  | y <sup>3+</sup> |
|---------|------------------|------------------|-----------------|----|--------|----|------------------|------------------|-----------------|
|         | 138.0662         | 69.5367          | 46.6936         | 1  | H      | 21 |                  |                  |                 |
|         | <b>267.1088</b>  | 134.0580         | 89.7078         | 2  | E      | 20 | 2454.1466        | 1227.5769        | <b>818.7204</b> |
|         | <b>448.1228</b>  | 224.5650         | 150.0458        | 3  | T[181] | 19 | 2325.1040        | <b>1163.0556</b> | <b>775.7062</b> |
|         | 545.1756         | 273.0914         | 182.3967        | 4  | P      | 18 | 2144.0900        | <b>1072.5486</b> | 715.3682        |
|         | <b>658.2596</b>  | 329.6334         | 220.0914        | 5  | L      | 17 | 2047.0372        | <b>1024.0222</b> | 683.0173        |
|         | <b>772.3025</b>  | 386.6549         | 258.1057        | 6  | N      | 16 | 1933.9531        | <b>967.4802</b>  | <b>645.3226</b> |
|         | <b>885.3866</b>  | 443.1969         | 295.8004        | 7  | I      | 15 | 1819.9102        | <b>910.4587</b>  | 607.3083        |
|         | <b>1041.4877</b> | <b>521.2475</b>  | 347.8341        | 8  | R      | 14 | 1706.8261        | <b>853.9167</b>  | 569.6136        |
|         | 1138.5405        | 569.7739         | 380.1850        | 9  | P      | 13 | <b>1550.7250</b> | <b>775.8662</b>  | 517.5799        |
|         | 1239.5882        | 620.2977         | 413.8676        | 10 | T      | 12 | <b>1453.6723</b> | <b>727.3398</b>  | 485.2289        |
|         | <b>1406.5865</b> | 703.7969         | 469.5337        | 11 | S[167] | 11 | 1352.6246        | 676.8159         | 451.5464        |
|         | 1503.6393        | 752.3233         | 501.8846        | 12 | P      | 10 | <b>1185.6262</b> | <b>593.3168</b>  | 395.8803        |
|         | 1666.7026        | 833.8549         | 556.2391        | 13 | Y      | 9  | <b>1088.5735</b> | 544.7904         | 363.5293        |
|         | 1767.7503        | 884.3788         | 589.9216        | 14 | T      | 8  | <b>925.5101</b>  | 463.2587         | 309.1749        |
|         | 1880.8343        | <b>940.9208</b>  | 627.6163        | 15 | L      | 7  | <b>824.4625</b>  | 412.7349         | 275.4923        |
|         | 1994.8773        | <b>997.9423</b>  | 665.6306        | 16 | N      | 6  | <b>711.3784</b>  | 356.1928         | 237.7977        |
|         | 2091.9300        | 1046.4687        | 697.9815        | 17 | P      | 5  | <b>597.3355</b>  | 299.1714         | 199.7833        |
|         | 2188.9828        | 1094.9950        | 730.3325        | 18 | P      | 4  | 500.2827         | 250.6450         | 167.4324        |
|         | 2288.0512        | <b>1144.5292</b> | 763.3553        | 19 | V      | 3  | 403.2299         | 202.1186         | 135.0815        |
|         | 2417.0938        | <b>1209.0505</b> | <b>806.3695</b> | 20 | E      | 2  | 304.1615         | 152.5844         | 102.0587        |
|         |                  |                  |                 | 21 | R      | 1  | 175.1190         | 88.0631          | 59.0445         |

# Annotated spectra from Saleem et. al. 2009

R.HGFT<sub>181</sub>GNSVNSR<sub>166</sub>S/2

0.9702

1e+04

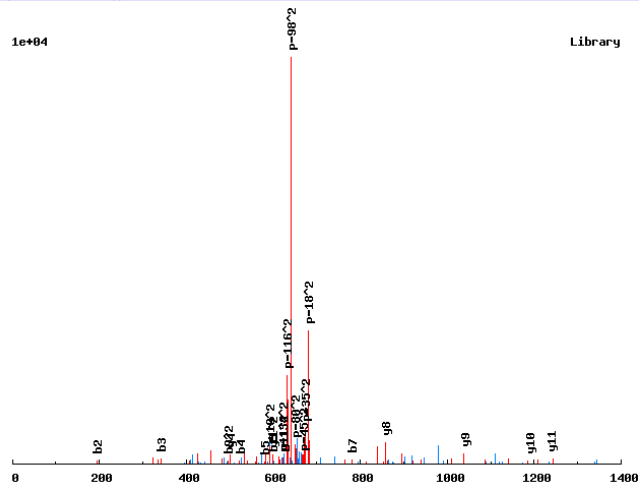

| Library | b <sup>1+</sup> | b <sup>2+</sup> | #  | AA     | #  | y <sup>1+</sup>  | y <sup>2+</sup> |
|---------|-----------------|-----------------|----|--------|----|------------------|-----------------|
|         | 138.0662        | 69.5367         | 1  | H      | 12 |                  |                 |
|         | <b>195.0876</b> | 98.0475         | 2  | G      | 11 | <b>1242.5138</b> | <b>621.7605</b> |
|         | <b>342.1561</b> | 171.5817        | 3  | F      | 10 | <b>1185.4924</b> | <b>593.2498</b> |
|         | <b>523.1701</b> | 262.0887        | 4  | T[181] | 9  | <b>1038.4240</b> | 519.7156        |
|         | <b>580.1915</b> | 290.5994        | 5  | G      | 8  | <b>857.4099</b>  | 429.2086        |
|         | 694.2345        | 347.6209        | 6  | N      | 7  | 800.3885         | 400.6979        |
|         | <b>781.2665</b> | 391.1369        | 7  | S      | 6  | 686.3455         | 343.6764        |
|         | 880.3349        | 440.6711        | 8  | V      | 5  | <b>599.3135</b>  | 300.1604        |
|         | 994.3778        | <b>497.6926</b> | 9  | N      | 4  | <b>500.2451</b>  | 250.6262        |
|         | 1108.4208       | 554.7140        | 10 | N      | 3  | 386.2022         | 193.6047        |
|         | 1195.4528       | <b>598.2300</b> | 11 | S      | 2  | 272.1592         | 136.5833        |
|         |                 |                 | 12 | R[166] | 1  | 185.1272         | 93.0672         |



# Annotated spectra from Saleem et. al. 2009

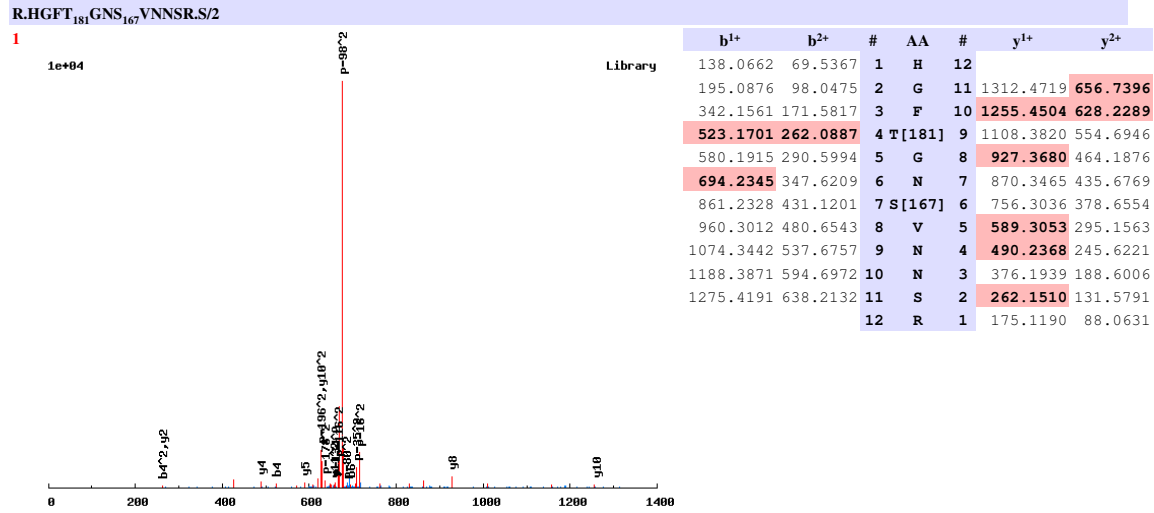

# Annotated spectra from Saleem et. al. 2009

R.HHQYGS<sub>167</sub>DEGEQDYHDDEQGEEQAGK.Q/3

0.9998

1e+04

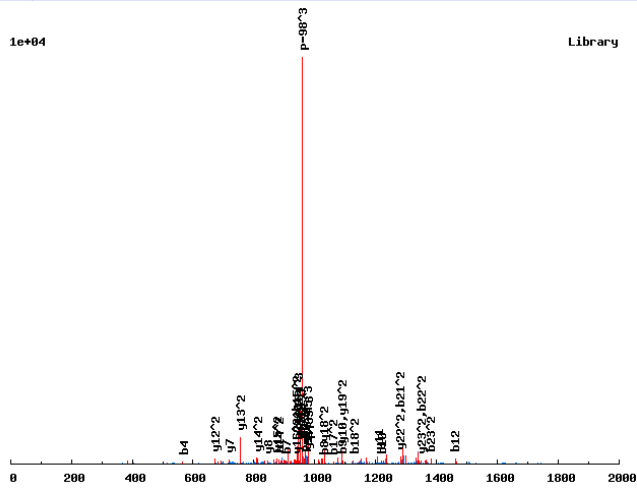

| Library | b <sup>1+</sup> | b <sup>2+</sup> | b <sup>3+</sup> | #  | AA     | #  | y <sup>1+</sup> | y <sup>2+</sup> | y <sup>3+</sup> |
|---------|-----------------|-----------------|-----------------|----|--------|----|-----------------|-----------------|-----------------|
|         | 138.0662        | 69.5367         | 46.6936         | 1  | H      | 25 |                 |                 |                 |
|         | 275.1251        | 138.0662        | 92.3799         | 2  | H      | 24 | 2831.0336       | 1416.0205       | 944.3494        |
|         | 403.1837        | 202.0955        | 135.0661        | 3  | Q      | 23 | 2693.9747       | 1347.4910       | 898.6631        |
|         | 566.2470        | 283.6271        | 189.4205        | 4  | Y      | 22 | 2565.9161       | 1283.4617       | 855.9769        |
|         | 623.2685        | 312.1379        | 208.4277        | 5  | G      | 21 | 2402.8528       | 1201.9300       | 801.6225        |
|         | 790.2668        | 395.6371        | 264.0938        | 6  | S[167] | 20 | 2345.8313       | 1173.4193       | 782.6153        |
|         | 905.2938        | 453.1505        | 302.4361        | 7  | D      | 19 | 2178.8330       | 1089.9201       | 726.9492        |
|         | 1034.3364       | 517.6718        | 345.4503        | 8  | E      | 18 | 2063.8060       | 1032.4067       | 688.6069        |
|         | 1091.3578       | 546.1826        | 364.4575        | 9  | G      | 17 | 1934.7634       | 967.8854        | 645.5927        |
|         | 1220.4004       | 610.7038        | 407.4717        | 10 | E      | 16 | 1877.7420       | 939.3746        | 626.5855        |
|         | 1348.4590       | 674.7331        | 450.1579        | 11 | Q      | 15 | 1748.6994       | 874.8533        | 583.5713        |
|         | 1463.4859       | 732.2466        | 488.5002        | 12 | D      | 14 | 1620.6408       | 810.8240        | 540.8851        |
|         | 1626.5493       | 813.7783        | 542.8546        | 13 | Y      | 13 | 1505.6139       | 753.3106        | 502.5428        |
|         | 1763.6082       | 882.3077        | 588.5409        | 14 | H      | 12 | 1342.5505       | 671.7789        | 448.1884        |
|         | 1878.6351       | 939.8212        | 626.8832        | 15 | D      | 11 | 1205.4916       | 603.2495        | 402.5021        |
|         | 1993.6621       | 997.3347        | 665.2255        | 16 | D      | 10 | 1090.4647       | 545.7360        | 364.1598        |
|         | 2122.7046       | 1061.8560       | 708.2397        | 17 | E      | 9  | 975.4378        | 488.2225        | 325.8174        |
|         | 2250.7632       | 1125.8853       | 750.9259        | 18 | Q      | 8  | 846.3952        | 423.7012        | 282.8032        |
|         | 2307.7847       | 1154.3960       | 769.9331        | 19 | G      | 7  | 718.3366        | 359.6719        | 240.1171        |
|         | 2436.8273       | 1218.9173       | 812.9473        | 20 | E      | 6  | 661.3151        | 331.1612        | 221.1099        |
|         | 2565.8699       | 1283.4386       | 855.9615        | 21 | E      | 5  | 532.2725        | 266.6399        | 178.0957        |
|         | 2693.9284       | 1347.4679       | 898.6477        | 22 | Q      | 4  | 403.2299        | 202.1186        | 135.0815        |
|         | 2764.9656       | 1382.9864       | 922.3267        | 23 | A      | 3  | 275.1714        | 138.0893        | 92.3953         |
|         | 2821.9870       | 1411.4971       | 941.3339        | 24 | G      | 2  | 204.1343        | 102.5708        | 68.7163         |
|         |                 |                 |                 | 25 | K      | 1  | 147.1128        | 74.0600         | 49.7091         |

# Annotated spectra from Saleem et. al. 2009

K.HIQEEEEQVDMT<sub>181</sub>GDEEQEEEPDREK.I/3

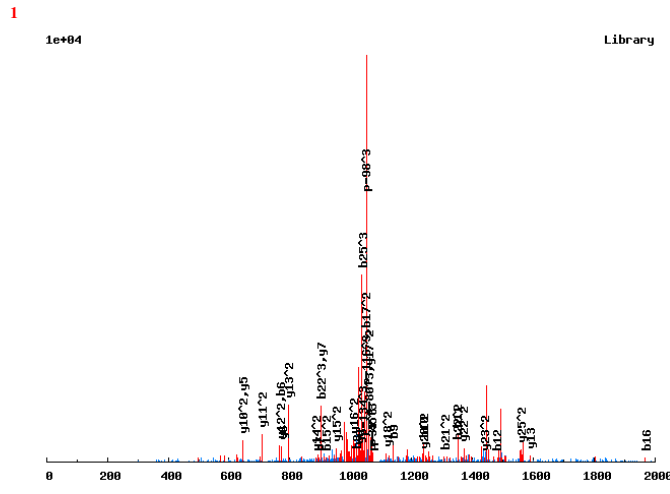

| Library | b <sup>1+</sup> | b <sup>2+</sup> | b <sup>3+</sup> | #  | AA     | #  | y <sup>1+</sup> | y <sup>2+</sup> | y <sup>3+</sup> |
|---------|-----------------|-----------------|-----------------|----|--------|----|-----------------|-----------------|-----------------|
|         | 138.0662        | 69.5367         | 46.6936         | 1  | H      | 26 |                 |                 |                 |
|         | 251.1502        | 126.0788        | 84.3883         | 2  | I      | 25 | 3116.2045       | 1558.6059       | 1039.4064       |
|         | 379.2088        | 190.1081        | 127.0745        | 3  | Q      | 24 | 3003.1204       | 1502.0639       | 1001.7117       |
|         | 508.2514        | 254.6293        | 170.0887        | 4  | E      | 23 | 2875.0619       | 1438.0346       | 959.0255        |
|         | 637.2940        | 319.1506        | 213.1029        | 5  | E      | 22 | 2746.0193       | 1373.5133       | 916.0113        |
|         | 766.3366        | 383.6719        | 256.1171        | 6  | E      | 21 | 2616.9767       | 1308.9920       | 872.9971        |
|         | 895.3792        | 448.1932        | 299.1313        | 7  | E      | 20 | 2487.9341       | 1244.4707       | 829.9829        |
|         | 1023.4378       | 512.2225        | 341.8174        | 8  | Q      | 19 | 2358.8915       | 1179.9494       | 786.9687        |
|         | 1138.4647       | 569.7360        | 380.1598        | 9  | D      | 18 | 2230.8329       | 1115.9201       | 744.2825        |
|         | 1237.5331       | 619.2702        | 413.1826        | 10 | V      | 17 | 2115.8060       | 1058.4066       | 705.9402        |
|         | 1352.5601       | 676.7837        | 451.5249        | 11 | D      | 16 | 2016.7376       | 1008.8724       | 672.9174        |
|         | 1483.6006       | 742.3039        | 495.2050        | 12 | M      | 15 | 1901.7106       | 951.3590        | 634.5751        |
|         | 1664.6146       | 832.8109        | 555.5430        | 13 | T[181] | 14 | 1770.6701       | 885.8387        | 590.8949        |
|         | 1721.6360       | 861.3217        | 574.5502        | 14 | G      | 13 | 1589.6561       | 795.3317        | 530.5569        |
|         | 1836.6630       | 918.8351        | 612.8925        | 15 | D      | 12 | 1532.6347       | 766.8210        | 511.5497        |
|         | 1965.7056       | 983.3564        | 655.9067        | 16 | E      | 11 | 1417.6077       | 709.3075        | 473.2074        |
|         | 2094.7481       | 1047.8777       | 698.9209        | 17 | E      | 10 | 1288.5651       | 644.7862        | 430.1932        |
|         | 2222.8067       | 1111.9070       | 741.6071        | 18 | Q      | 9  | 1159.5225       | 580.2649        | 387.1790        |
|         | 2351.8493       | 1176.4283       | 784.6213        | 19 | E      | 8  | 1031.4640       | 516.2356        | 344.4928        |
|         | 2480.8919       | 1240.9496       | 827.6355        | 20 | E      | 7  | 902.4214        | 451.7143        | 301.4786        |
|         | 2609.9345       | 1305.4709       | 870.6497        | 21 | E      | 6  | 773.3788        | 387.1930        | 258.4645        |
|         | 2706.9873       | 1353.9973       | 903.0006        | 22 | P      | 5  | 644.3362        | 322.6717        | 215.4503        |
|         | 2822.0142       | 1411.5107       | 941.3429        | 23 | D      | 4  | 547.2834        | 274.1454        | 183.0993        |
|         | 2978.1153       | 1489.5613       | 993.3766        | 24 | R      | 3  | 432.2565        | 216.6319        | 144.7570        |
|         | 3107.1579       | 1554.0826       | 1036.3908       | 25 | E      | 2  | 276.1554        | 138.5813        | 92.7233         |
|         |                 |                 |                 | 26 | K      | 1  | 147.1128        | 74.0600         | 49.7091         |

# Annotated spectra from Saleem et. al. 2009

K.HISTDFS<sub>167</sub>DDLEKEEHNQSLQPTVENR.A/4

0.9141

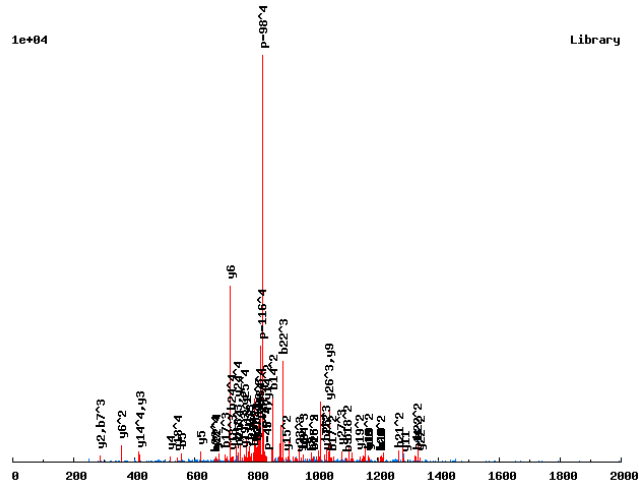

| Library | b <sup>1+</sup> | b <sup>2+</sup> | b <sup>3+</sup> | b <sup>4+</sup> | #  | AA     | #  | y <sup>1+</sup> | y <sup>2+</sup> | y <sup>3+</sup> | y <sup>4+</sup> |
|---------|-----------------|-----------------|-----------------|-----------------|----|--------|----|-----------------|-----------------|-----------------|-----------------|
|         | 138.0662        | 69.5367         | 46.6936         | 35.2720         | 1  | H      | 28 |                 |                 |                 |                 |
|         | 251.1502        | 126.0788        | 84.3883         | 63.5430         | 2  | I      | 27 | 3241.3804       | 1621.1939       | 1081.1317       | 811.1006        |
|         | 338.1823        | 169.5948        | 113.3989        | 85.3010         | 3  | S      | 26 | 3128.2964       | 1564.6518       | 1043.4370       | 782.8296        |
|         | 439.2300        | 220.1186        | 147.0815        | 110.5629        | 4  | T      | 25 | 3041.2644       | 1521.1358       | 1014.4263       | 761.0715        |
|         | 554.2569        | 277.6321        | 185.4238        | 139.3197        | 5  | D      | 24 | 2940.2167       | 1470.6120       | 980.7437        | 735.8096        |
|         | 701.3253        | 351.1663        | 234.4466        | 176.0868        | 6  | F      | 23 | 2825.1897       | 1413.0985       | 942.4014        | 707.0529        |
|         | 868.3237        | 434.6655        | 290.1127        | 217.8364        | 7  | S[167] | 22 | 2678.1213       | 1339.5643       | 893.3786        | 670.2858        |
|         | 983.3506        | 492.1789        | 328.4551        | 246.5931        | 8  | D      | 21 | 2511.1230       | 1256.0651       | 837.7125        | 628.5362        |
|         | 1098.3776       | 549.6924        | 366.7974        | 275.3498        | 9  | D      | 20 | 2396.0960       | 1198.5516       | 799.3702        | 599.7795        |
|         | 1213.4045       | 607.2059        | 405.1397        | 304.1066        | 10 | D      | 19 | 2281.0691       | 1141.0382       | 761.0279        | 571.0227        |
|         | 1326.4886       | 663.7479        | 442.8344        | 332.3776        | 11 | L      | 18 | 2166.0421       | 1083.5247       | 722.6856        | 542.2660        |
|         | 1455.5311       | 728.2692        | 485.8486        | 364.6382        | 12 | E      | 17 | 2052.9581       | 1026.9827       | 684.9909        | 513.9950        |
|         | 1583.6261       | 792.3167        | 528.5469        | 396.6620        | 13 | K      | 16 | 1923.9155       | 962.4614        | 641.9767        | 481.7343        |
|         | 1712.6687       | 856.8380        | 571.5611        | 428.9226        | 14 | E      | 15 | 1795.8205       | 898.4139        | 599.2784        | 449.7106        |
|         | 1841.7113       | 921.3593        | 614.5753        | 461.1833        | 15 | E      | 14 | 1666.7779       | 833.8926        | 556.2642        | 417.4499        |
|         | 1978.7702       | 989.8887        | 660.2616        | 495.4480        | 16 | H      | 13 | 1537.7354       | 769.3713        | 513.2500        | 385.1893        |
|         | 2092.8131       | 1046.9102       | 698.2759        | 523.9587        | 17 | N      | 12 | 1400.6764       | 700.8419        | 467.5637        | 350.9246        |
|         | 2207.8401       | 1104.4237       | 736.6182        | 552.7155        | 18 | D      | 11 | 1286.6335       | 643.8204        | 429.5494        | 322.4138        |
|         | 2335.8986       | 1168.4530       | 779.3044        | 584.7301        | 19 | Q      | 10 | 1171.6066       | 586.3069        | 391.2070        | 293.6571        |
|         | 2422.9307       | 1211.9690       | 808.3151        | 606.4881        | 20 | S      | 9  | 1043.5480       | 522.2776        | 348.5209        | 261.6425        |
|         | 2536.0147       | 1268.5110       | 846.0098        | 634.7591        | 21 | L      | 8  | 956.5160        | 478.7616        | 319.5102        | 239.8845        |
|         | 2664.0733       | 1332.5403       | 888.6960        | 666.7738        | 22 | Q      | 7  | 843.4319        | 422.2196        | 281.8155        | 211.6134        |
|         | 2761.1261       | 1381.0667       | 921.0469        | 691.0370        | 23 | P      | 6  | 715.3733        | 358.1903        | 239.1293        | 179.5988        |
|         | 2862.1738       | 1431.5905       | 954.7294        | 716.2989        | 24 | T      | 5  | 618.3206        | 309.6639        | 206.7784        | 155.3356        |
|         | 2961.2422       | 1481.1247       | 987.7522        | 741.0660        | 25 | V      | 4  | 517.2729        | 259.1401        | 173.0958        | 130.0737        |
|         | 3090.2848       | 1545.6460       | 1030.7664       | 773.3266        | 26 | E      | 3  | 418.2045        | 209.6059        | 140.0730        | 105.3066        |
|         | 3204.3277       | 1602.6675       | 1068.7807       | 801.8374        | 27 | N      | 2  | 289.1619        | 145.0846        | 97.0588         | 73.0459         |
|         |                 |                 |                 |                 | 28 | R      | 1  | 175.1190        | 88.0631         | 59.0445         | 44.5352         |

Annotated spectra from Saleem et. al. 2009

K.HLPDAEKIDS<sub>167</sub>T<sub>181</sub>TTFDQEINGDKL/3

0.8911

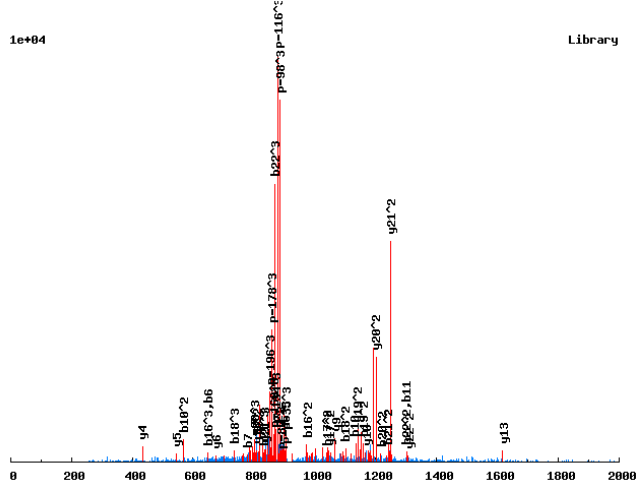

| Library | b <sup>1+</sup> | b <sup>2+</sup> | b <sup>3+</sup> | #  | AA     | #  | y <sup>1+</sup> | y <sup>2+</sup> | y <sup>3+</sup> |
|---------|-----------------|-----------------|-----------------|----|--------|----|-----------------|-----------------|-----------------|
|         | 138.0662        | 69.5367         | 46.6936         | 1  | H      | 23 |                 |                 |                 |
|         | 251.1502        | 126.0788        | 84.3883         | 2  | L      | 22 | 2612.0688       | 1306.5380       | 871.3611        |
|         | 348.2030        | 174.6051        | 116.7392        | 3  | P      | 21 | 2498.9847       | 1249.9960       | 833.6664        |
|         | 463.2299        | 232.1186        | 155.0815        | 4  | D      | 20 | 2401.9320       | 1201.4696       | 801.3155        |
|         | 534.2671        | 267.6372        | 178.7605        | 5  | A      | 19 | 2286.9050       | 1143.9562       | 762.9732        |
|         | 649.2940        | 325.1506        | 217.1029        | 6  | D      | 18 | 2215.8679       | 1108.4376       | 739.2942        |
|         | 778.3366        | 389.6719        | 260.1171        | 7  | E      | 17 | 2100.8410       | 1050.9241       | 700.9519        |
|         | 906.4316        | 453.7194        | 302.8154        | 8  | K      | 16 | 1971.7984       | 986.4028        | 657.9377        |
|         | 1019.5156       | 510.2614        | 340.5101        | 9  | I      | 15 | 1843.7034       | 922.3554        | 615.2393        |
|         | 1134.5426       | 567.7749        | 378.8524        | 10 | D      | 14 | 1730.6194       | 865.8133        | 577.5446        |
|         | 1301.5409       | 651.2741        | 434.5185        | 11 | S[167] | 13 | 1615.5924       | 808.2999        | 539.2023        |
|         | 1482.5549       | 741.7811        | 494.8565        | 12 | T[181] | 12 | 1448.5941       | 724.8007        | 483.5362        |
|         | 1583.6026       | 792.3049        | 528.5391        | 13 | T      | 11 | 1267.5801       | 634.2937        | 423.1982        |
|         | 1684.6503       | 842.8288        | 562.2216        | 14 | T      | 10 | 1166.5324       | 583.7698        | 389.5156        |
|         | 1831.7187       | 916.3630        | 611.2444        | 15 | F      | 9  | 1065.4847       | 533.2460        | 355.8331        |
|         | 1946.7456       | 973.8765        | 649.5867        | 16 | D      | 8  | 918.4163        | 459.7118        | 306.8103        |
|         | 2074.8042       | 1037.9057       | 692.2729        | 17 | Q      | 7  | 803.3894        | 402.1983        | 268.4680        |
|         | 2203.8468       | 1102.4270       | 735.2871        | 18 | E      | 6  | 675.3308        | 338.1690        | 225.7818        |
|         | 2316.9309       | 1158.9691       | 772.9818        | 19 | I      | 5  | 546.2882        | 273.6477        | 182.7676        |
|         | 2430.9738       | 1215.9905       | 810.9961        | 20 | N      | 4  | 433.2041        | 217.1057        | 145.0729        |
|         | 2487.9953       | 1244.5013       | 830.0033        | 21 | G      | 3  | 319.1612        | 160.0842        | 107.0586        |
|         | 2603.0222       | 1302.0147       | 868.3456        | 22 | D      | 2  | 262.1397        | 131.5735        | 88.0514         |
|         |                 |                 |                 | 23 | K      | 1  | 147.1128        | 74.0600         | 49.7091         |

# Annotated spectra from Saleem et. al. 2009

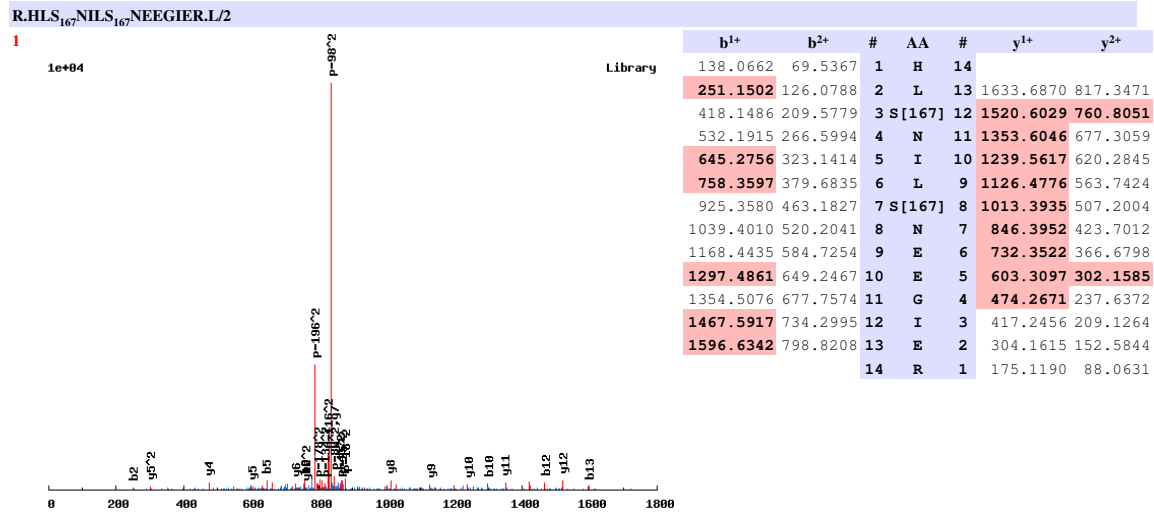

# Annotated spectra from Saleem et. al. 2009

K.HNDVIENVEEDKEVHT<sub>181</sub>N<sub>-</sub>/3

0.9997

1e+04

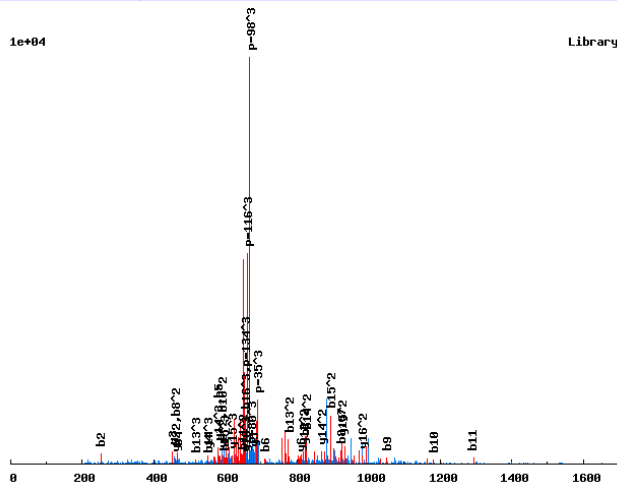

| Library | b <sup>1+</sup>  | b <sup>2+</sup> | b <sup>3+</sup> | #  | AA     | #  | y <sup>1+</sup> | y <sup>2+</sup> | y <sup>3+</sup> |
|---------|------------------|-----------------|-----------------|----|--------|----|-----------------|-----------------|-----------------|
|         | 138.0662         | 69.5367         | 46.6936         | 1  | H      | 17 |                 |                 |                 |
|         | <b>252.1091</b>  | 126.5582        | 84.7079         | 2  | N      | 16 | 1963.8280       | <b>982.4177</b> | <b>655.2809</b> |
|         | 367.1361         | 184.0717        | 123.0502        | 3  | D      | 15 | 1849.7851       | <b>925.3962</b> | <b>617.2666</b> |
|         | <b>466.2045</b>  | 233.6059        | 156.0730        | 4  | V      | 14 | 1734.7582       | <b>867.8827</b> | <b>578.9242</b> |
|         | <b>579.2885</b>  | 290.1479        | 193.7677        | 5  | I      | 13 | 1635.6898       | <b>818.3485</b> | 545.9014        |
|         | <b>708.3311</b>  | 354.6692        | 236.7819        | 6  | E      | 12 | 1522.6057       | 761.8065        | 508.2068        |
|         | <b>822.3741</b>  | 411.6907        | 274.7962        | 7  | N      | 11 | 1393.5631       | 697.2852        | 465.1926        |
|         | <b>921.4425</b>  | <b>461.2249</b> | 307.8190        | 8  | V      | 10 | 1279.5202       | 640.2637        | 427.1782        |
|         | <b>1050.4851</b> | 525.7462        | 350.8332        | 9  | E      | 9  | 1180.4518       | <b>590.7295</b> | 394.1554        |
|         | <b>1179.5276</b> | <b>590.2675</b> | 393.8474        | 10 | E      | 8  | 1051.4092       | 526.2082        | 351.1412        |
|         | <b>1294.5546</b> | <b>647.7809</b> | 432.1897        | 11 | D      | 7  | <b>922.3666</b> | <b>461.6869</b> | 308.1271        |
|         | 1422.6495        | 711.8284        | 474.8880        | 12 | K      | 6  | <b>807.3397</b> | 404.1735        | 269.7847        |
|         | 1551.6921        | <b>776.3497</b> | <b>517.9022</b> | 13 | E      | 5  | <b>679.2447</b> | 340.1260        | 227.0864        |
|         | 1650.7605        | <b>825.8839</b> | <b>550.9250</b> | 14 | V      | 4  | <b>550.2021</b> | 275.6047        | 184.0722        |
|         | 1787.8194        | <b>894.4134</b> | <b>596.6113</b> | 15 | H      | 3  | <b>451.1337</b> | 226.0705        | 151.0494        |
|         | 1968.8335        | 984.9204        | <b>656.9493</b> | 16 | T[181] | 2  | 314.0748        | 157.5410        | 105.3631        |
|         |                  |                 |                 | 17 | N      | 1  | 133.0608        | 67.0340         | 45.0251         |

# Annotated spectra from Saleem et. al. 2009

R.HNS<sub>167</sub>-NTVTPNFR<sub>166</sub>-R/2

0.6122

1e+04

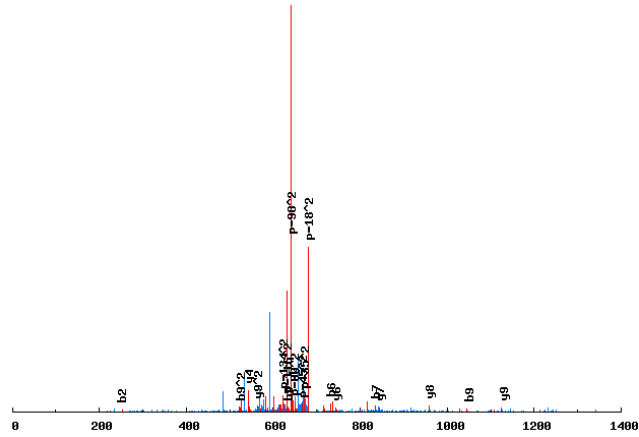

| Library | b <sup>1+</sup> | b <sup>2+</sup> | #  | AA     | #  | y <sup>1+</sup> | y <sup>2+</sup> |
|---------|-----------------|-----------------|----|--------|----|-----------------|-----------------|
|         | 138.0662        | 69.5367         | 1  | H      | 11 |                 |                 |
|         | 252.1091        | 126.5582        | 2  | N      | 10 | 1239.5393       | 620.2733        |
|         | 419.1075        | 210.0574        | 3  | S[167] | 9  | 1125.4964       | 563.2518        |
|         | 533.1504        | 267.0788        | 4  | N      | 8  | 958.4980        | 479.7526        |
|         | 634.1981        | 317.6027        | 5  | T      | 7  | 844.4551        | 422.7312        |
|         | 733.2665        | 367.1369        | 6  | V      | 6  | 743.4074        | 372.2073        |
|         | 834.3142        | 417.6607        | 7  | T      | 5  | 644.3390        | 322.6731        |
|         | 931.3669        | 466.1871        | 8  | P      | 4  | 543.2913        | 272.1493        |
|         | 1045.4099       | 523.2086        | 9  | N      | 3  | 446.2386        | 223.6229        |
|         | 1192.4783       | 596.7428        | 10 | F      | 2  | 332.1956        | 166.6015        |
|         |                 |                 | 11 | R[166] | 1  | 185.1272        | 93.0672         |



# Annotated spectra from Saleem et. al. 2009

R.HPET<sub>181</sub>PPPVRR.A/3

0.983

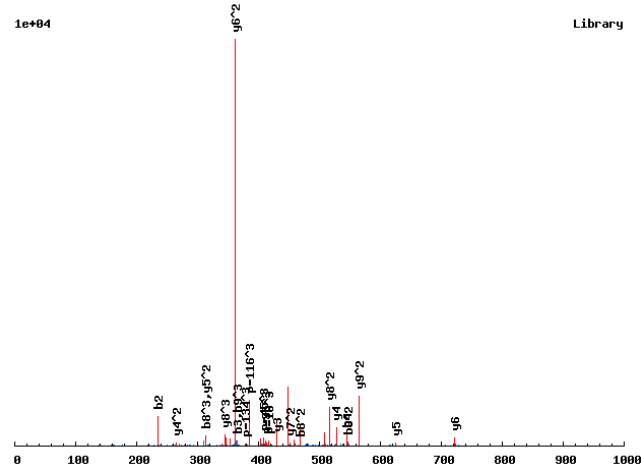

| Library | b <sup>1+</sup> | b <sup>2+</sup> | b <sup>3+</sup> | #  | AA      | #  | y <sup>1+</sup> | y <sup>2+</sup> | y <sup>3+</sup> |
|---------|-----------------|-----------------|-----------------|----|---------|----|-----------------|-----------------|-----------------|
|         | 138.0662        | 69.5367         | 46.6936         | 1  | H       | 10 |                 |                 |                 |
|         | <b>235.1190</b> | 118.0631        | 79.0445         | 2  | P       | 9  | 1128.5561       | <b>564.7817</b> | 376.8569        |
|         | <b>364.1615</b> | 182.5844        | 122.0587        | 3  | E       | 8  | 1031.5034       | <b>516.2553</b> | <b>344.5060</b> |
|         | <b>545.1756</b> | 273.0914        | 182.3967        | 4  | T [181] | 7  | 902.4608        | <b>451.7340</b> | 301.4918        |
|         | 642.2283        | 321.6178        | 214.7476        | 5  | P       | 6  | <b>721.4468</b> | <b>361.2270</b> | 241.1538        |
|         | 739.2811        | 370.1442        | 247.0985        | 6  | P       | 5  | <b>624.3940</b> | <b>312.7006</b> | 208.8029        |
|         | 836.3338        | 418.6706        | 279.4495        | 7  | P       | 4  | <b>527.3412</b> | <b>264.1743</b> | 176.4519        |
|         | 935.4022        | <b>468.2048</b> | <b>312.4723</b> | 8  | V       | 3  | <b>430.2885</b> | 215.6479        | 144.1010        |
|         | 1091.5034       | <b>546.2553</b> | <b>364.5060</b> | 9  | R       | 2  | 331.2201        | 166.1137        | 111.0782        |
|         |                 |                 |                 | 10 | R       | 1  | 175.1190        | 88.0631         | 59.0445         |

# Annotated spectra from Saleem et. al. 2009

K.HQQPVASSTVNSNKS<sub>167</sub>S<sub>167</sub>TDIR.R/3

0.9865

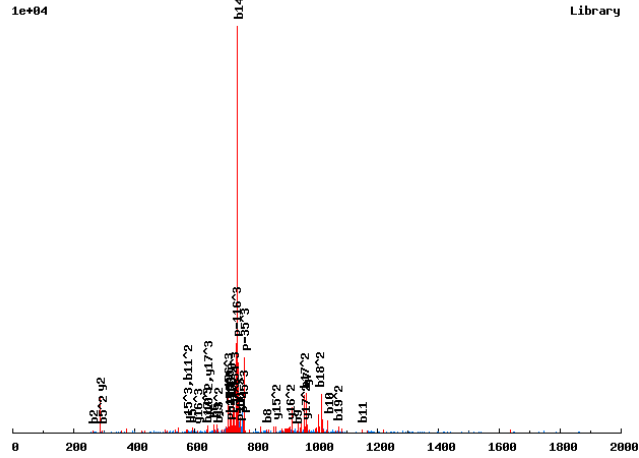

| Library | b <sup>1+</sup>  | b <sup>2+</sup>  | b <sup>3+</sup> | #  | AA     | #  | y <sup>1+</sup> | y <sup>2+</sup> | y <sup>3+</sup> |
|---------|------------------|------------------|-----------------|----|--------|----|-----------------|-----------------|-----------------|
|         | 138.0662         | 69.5367          | 46.6936         | 1  | H      | 20 |                 |                 |                 |
|         | <b>266.1248</b>  | 133.5660         | 89.3798         | 2  | Q      | 19 | 2178.9428       | 1089.9750       | 726.9858        |
|         | 394.1833         | 197.5953         | 132.0660        | 3  | Q      | 18 | 2050.8842       | 1025.9457       | 684.2996        |
|         | 491.2361         | 246.1217         | 164.4169        | 4  | P      | 17 | 1922.8256       | <b>961.9165</b> | <b>641.6134</b> |
|         | <b>590.3045</b>  | <b>295.6559</b>  | 197.4397        | 5  | V      | 16 | 1825.7729       | <b>913.3901</b> | <b>609.2625</b> |
|         | <b>661.3416</b>  | 331.1745         | 221.1187        | 6  | A      | 15 | 1726.7045       | <b>863.8559</b> | <b>576.2397</b> |
|         | <b>748.3737</b>  | 374.6905         | 250.1294        | 7  | S      | 14 | 1655.6674       | 828.3373        | 552.5606        |
|         | <b>835.4057</b>  | 418.2065         | 279.1401        | 8  | S      | 13 | 1568.6353       | 784.8213        | 523.5500        |
|         | <b>936.4534</b>  | 468.7303         | 312.8226        | 9  | T      | 12 | 1481.6033       | <b>741.3053</b> | 494.5393        |
|         | <b>1035.5218</b> | 518.2645         | 345.8454        | 10 | V      | 11 | 1380.5556       | 690.7814        | 460.8567        |
|         | <b>1149.5647</b> | <b>575.2860</b>  | 383.8598        | 11 | N      | 10 | 1281.4872       | <b>641.2472</b> | 427.8339        |
|         | 1236.5967        | 618.8020         | 412.8704        | 12 | S      | 9  | 1167.4443       | 584.2258        | 389.8196        |
|         | 1350.6397        | <b>675.8235</b>  | 450.8847        | 13 | N      | 8  | 1080.4122       | 540.7098        | 360.8089        |
|         | 1478.7346        | <b>739.8710</b>  | 493.5831        | 14 | K      | 7  | <b>966.3693</b> | 483.6883        | 322.7946        |
|         | 1645.7330        | 823.3701         | 549.2492        | 15 | S[167] | 6  | 838.2744        | 419.6408        | 280.0963        |
|         | 1812.7314        | 906.8693         | 604.9153        | 16 | S[167] | 5  | <b>671.2760</b> | 336.1416        | 224.4302        |
|         | 1913.7790        | <b>957.3932</b>  | <b>638.5979</b> | 17 | T      | 4  | 504.2776        | 252.6425        | 168.7641        |
|         | 2028.8060        | <b>1014.9066</b> | 676.9402        | 18 | D      | 3  | 403.2299        | 202.1186        | 135.0815        |
|         | 2141.8900        | <b>1071.4487</b> | <b>714.6349</b> | 19 | I      | 2  | <b>288.2030</b> | 144.6051        | 96.7392         |
|         |                  |                  |                 | 20 | R      | 1  | 175.1190        | 88.0631         | 59.0445         |

# Annotated spectra from Saleem et. al. 2009

K.HQPVASST<sub>181</sub>VNS<sub>167</sub>NKS<sub>167</sub>STDIR.R/3

0.8596

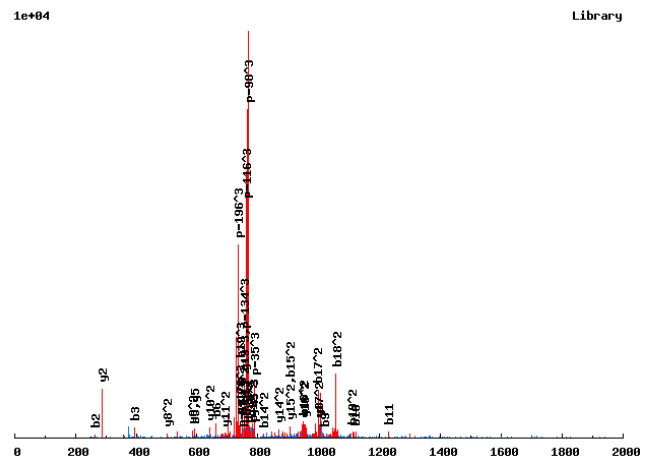

| Library | b <sup>1+</sup>  | b <sup>2+</sup>  | b <sup>3+</sup> | #  | AA     | #  | y <sup>1+</sup>  | y <sup>2+</sup>  | y <sup>3+</sup> |
|---------|------------------|------------------|-----------------|----|--------|----|------------------|------------------|-----------------|
|         | 138.0662         | 69.5367          | 46.6936         | 1  | H      | 20 |                  |                  |                 |
|         | <b>266.1248</b>  | 133.5660         | 89.3798         | 2  | Q      | 19 | 2258.9091        | 1129.9582        | <b>753.6412</b> |
|         | <b>394.1833</b>  | 197.5953         | 132.0660        | 3  | Q      | 18 | 2130.8505        | 1065.9289        | 710.9550        |
|         | 491.2361         | 246.1217         | 164.4169        | 4  | P      | 17 | 2002.7920        | <b>1001.8996</b> | 668.2688        |
|         | <b>590.3045</b>  | 295.6559         | 197.4397        | 5  | V      | 16 | 1905.7392        | <b>953.3732</b>  | 635.9179        |
|         | <b>661.3416</b>  | 331.1745         | 221.1187        | 6  | A      | 15 | 1806.6708        | <b>903.8390</b>  | 602.8951        |
|         | <b>748.3737</b>  | 374.6905         | 250.1294        | 7  | S      | 14 | 1735.6337        | <b>868.3205</b>  | 579.2161        |
|         | 835.4057         | 418.2065         | 279.1401        | 8  | S      | 13 | 1648.6017        | 824.8045         | 550.2054        |
|         | <b>1016.4197</b> | 508.7135         | 339.4781        | 9  | T[181] | 12 | 1561.5696        | <b>781.2885</b>  | 521.1947        |
|         | <b>1115.4881</b> | 558.2477         | 372.5009        | 10 | V      | 11 | 1380.5556        | <b>690.7814</b>  | 460.8567        |
|         | <b>1229.5310</b> | 615.2692         | 410.5152        | 11 | N      | 10 | 1281.4872        | <b>641.2472</b>  | 427.8339        |
|         | 1396.5294        | 698.7683         | 466.1813        | 12 | S[167] | 9  | 1167.4443        | <b>584.2258</b>  | 389.8196        |
|         | 1510.5723        | <b>755.7898</b>  | 504.1956        | 13 | N      | 8  | <b>1000.4459</b> | <b>500.7266</b>  | 334.1535        |
|         | 1638.6673        | <b>819.8373</b>  | 546.8940        | 14 | K      | 7  | 886.4030         | 443.7051         | 296.1392        |
|         | 1805.6657        | <b>903.3365</b>  | 602.5601        | 15 | S[167] | 6  | <b>758.3080</b>  | 379.6577         | 253.4409        |
|         | 1892.6977        | <b>946.8525</b>  | 631.5707        | 16 | S      | 5  | <b>591.3097</b>  | 296.1585         | 197.7747        |
|         | 1993.7454        | <b>997.3763</b>  | 665.2533        | 17 | T      | 4  | 504.2776         | 252.6425         | 168.7641        |
|         | 2108.7723        | <b>1054.8898</b> | 703.5956        | 18 | D      | 3  | 403.2299         | 202.1186         | 135.0815        |
|         | 2221.8564        | <b>1111.4318</b> | <b>741.2903</b> | 19 | I      | 2  | <b>288.2030</b>  | 144.6051         | 96.7392         |
|         |                  |                  |                 | 20 | R      | 1  | 175.1190         | 88.0631          | 59.0445         |

# Annotated spectra from Saleem et. al. 2009

R.HS<sub>167</sub>IDGRPPSQATK.S/3

0.9941

1e+04

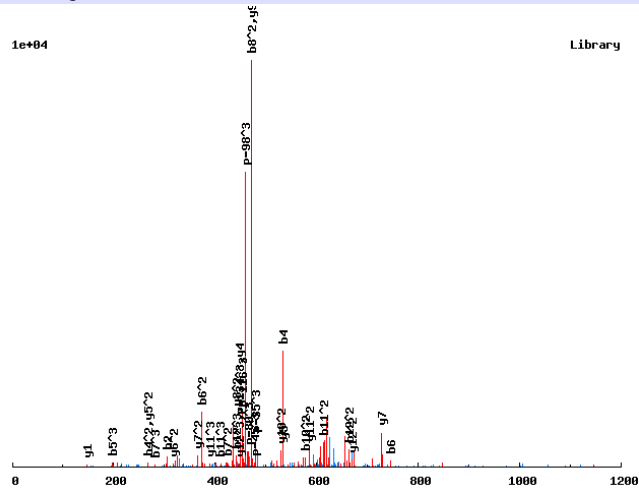

| Library | b <sup>1+</sup> | b <sup>2+</sup> | b <sup>3+</sup> | #  | AA      | #  | y <sup>1+</sup> | y <sup>2+</sup> | y <sup>3+</sup> |
|---------|-----------------|-----------------|-----------------|----|---------|----|-----------------|-----------------|-----------------|
|         | 138.0662        | 69.5367         | 46.6936         | 1  | H       | 13 |                 |                 |                 |
|         | <b>305.0646</b> | 153.0359        | 102.3597        | 2  | S [167] | 12 | 1336.6257       | <b>668.8165</b> | <b>446.2134</b> |
|         | 418.1486        | 209.5779        | 140.0544        | 3  | I       | 11 | 1169.6273       | <b>585.3173</b> | <b>390.5473</b> |
|         | <b>533.1756</b> | <b>267.0914</b> | 178.3967        | 4  | D       | 10 | 1056.5432       | <b>528.7753</b> | 352.8526        |
|         | 590.1970        | 295.6021        | <b>197.4039</b> | 5  | G       | 9  | 941.5163        | <b>471.2618</b> | 314.5103        |
|         | <b>746.2981</b> | <b>373.6527</b> | 249.4376        | 6  | R       | 8  | 884.4948        | <b>442.7511</b> | 295.5031        |
|         | 843.3509        | <b>422.1791</b> | <b>281.7885</b> | 7  | P       | 7  | <b>728.3937</b> | <b>364.7005</b> | 243.4694        |
|         | 940.4036        | <b>470.7055</b> | 314.1394        | 8  | P       | 6  | 631.3410        | <b>316.1741</b> | 211.1185        |
|         | 1027.4357       | 514.2215        | 343.1501        | 9  | S       | 5  | <b>534.2882</b> | <b>267.6477</b> | 178.7676        |
|         | 1155.4943       | <b>578.2508</b> | 385.8363        | 10 | Q       | 4  | <b>447.2562</b> | 224.1317        | 149.7569        |
|         | 1226.5314       | <b>613.7693</b> | <b>409.5153</b> | 11 | A       | 3  | 319.1976        | 160.1024        | 107.0707        |
|         | 1327.5790       | <b>664.2932</b> | <b>443.1979</b> | 12 | T       | 2  | 248.1605        | 124.5839        | 83.3917         |
|         |                 |                 |                 | 13 | K       | 1  | <b>147.1128</b> | 74.0600         | 49.7091         |

# Annotated spectra from Saleem et. al. 2009

R.HSRPLS<sub>167</sub>ISS<sub>167</sub>TTPLDLQR.D/3

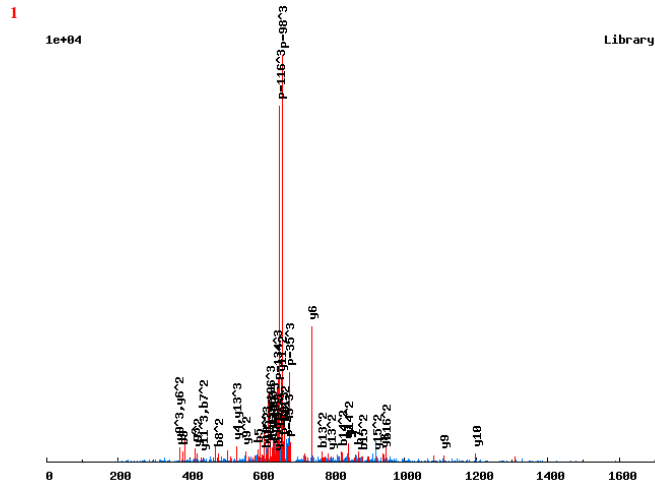

| Library | b <sup>1+</sup> | b <sup>2+</sup> | b <sup>3+</sup> | #  | AA     | #  | y <sup>1+</sup>  | y <sup>2+</sup> | y <sup>3+</sup> |
|---------|-----------------|-----------------|-----------------|----|--------|----|------------------|-----------------|-----------------|
|         | 138.0662        | 69.5367         | 46.6936         | 1  | H      | 17 |                  |                 |                 |
|         | 225.0982        | 113.0528        | 75.7043         | 2  | S      | 16 | 1930.9035        | 965.9554        | <b>644.3060</b> |
|         | <b>381.1993</b> | 191.1033        | 127.7380        | 3  | R      | 15 | 1843.8715        | <b>922.4394</b> | <b>615.2953</b> |
|         | 478.2521        | 239.6297        | 160.0889        | 4  | P      | 14 | 1687.7703        | <b>844.3888</b> | 563.2616        |
|         | <b>591.3362</b> | 296.1717        | 197.7836        | 5  | L      | 13 | 1590.7176        | <b>795.8624</b> | <b>530.9107</b> |
|         | 758.3345        | 379.6709        | 253.4497        | 6  | S[167] | 12 | 1477.6335        | 739.3204        | 493.2160        |
|         | <b>871.4186</b> | <b>436.2129</b> | 291.1444        | 7  | I      | 11 | 1310.6352        | <b>655.8212</b> | <b>437.5499</b> |
|         | 958.4506        | <b>479.7289</b> | 320.1551        | 8  | S      | 10 | <b>1197.5511</b> | 599.2792        | 399.8552        |
|         | 1125.4490       | 563.2281        | 375.8212        | 9  | S[167] | 9  | <b>1110.5191</b> | <b>555.7632</b> | <b>370.8445</b> |
|         | 1226.4966       | <b>613.7520</b> | 409.5037        | 10 | T      | 8  | <b>943.5207</b>  | 472.2640        | 315.1784        |
|         | 1327.5443       | <b>664.2758</b> | 443.1863        | 11 | T      | 7  | <b>842.4730</b>  | <b>421.7402</b> | 281.4959        |
|         | 1424.5971       | 712.8022        | 475.5372        | 12 | P      | 6  | <b>741.4254</b>  | <b>371.2163</b> | 247.8133        |
|         | 1537.6811       | <b>769.3442</b> | 513.2319        | 13 | L      | 5  | <b>644.3726</b>  | 322.6899        | 215.4624        |
|         | 1652.7081       | <b>826.8577</b> | 551.5742        | 14 | D      | 4  | <b>531.2885</b>  | 266.1479        | 177.7677        |
|         | 1765.7921       | <b>883.3997</b> | 589.2689        | 15 | L      | 3  | <b>416.2616</b>  | 208.6344        | 139.4254        |
|         | 1893.8507       | <b>947.4290</b> | <b>631.9551</b> | 16 | Q      | 2  | 303.1775         | 152.0924        | 101.7307        |
|         |                 |                 |                 | 17 | R      | 1  | 175.1190         | 88.0631         | 59.0445         |

# Annotated spectra from Saleem et. al. 2009

R.HSS<sub>167</sub>PDPYGINDK<sub>136</sub>FFDLEK<sub>136</sub>F/3

0.9834

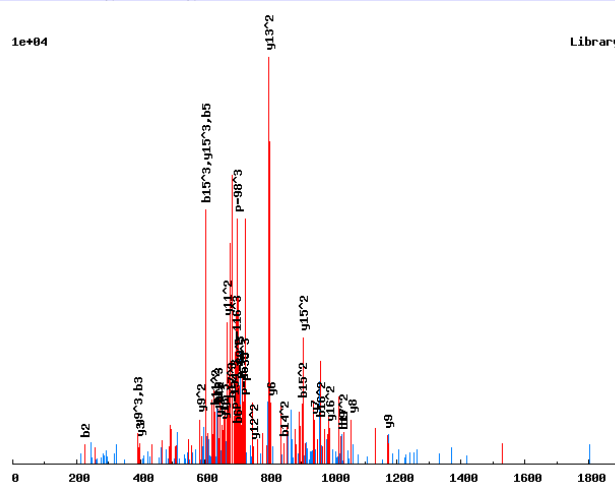

| Library | b <sup>1+</sup>  | b <sup>2+</sup>  | b <sup>3+</sup> | #  | AA     | #  | y <sup>1+</sup>  | y <sup>2+</sup> | y <sup>3+</sup> |
|---------|------------------|------------------|-----------------|----|--------|----|------------------|-----------------|-----------------|
|         | 138.0662         | 69.5367          | 46.6936         | 1  | H      | 18 |                  |                 |                 |
|         | <b>225.0982</b>  | 113.0528         | 75.7043         | 2  | S      | 17 | 2067.9281        | 1034.4677       | 689.9809        |
|         | <b>392.0966</b>  | 196.5519         | 131.3704        | 3  | S[167] | 16 | 1980.8961        | <b>990.9517</b> | <b>660.9702</b> |
|         | 489.1493         | 245.0783         | 163.7213        | 4  | P      | 15 | 1813.8977        | <b>907.4525</b> | <b>605.3041</b> |
|         | <b>604.1763</b>  | 302.5918         | 202.0636        | 5  | D      | 14 | 1716.8450        | 858.9261        | 572.9532        |
|         | <b>701.2290</b>  | 351.1182         | 234.4145        | 6  | P      | 13 | 1601.8180        | <b>801.4127</b> | 534.6109        |
|         | 864.2924         | 432.6498         | 288.7690        | 7  | Y      | 12 | 1504.7653        | <b>752.8863</b> | 502.2599        |
|         | 921.3138         | 461.1606         | 307.7761        | 8  | G      | 11 | 1341.7020        | <b>671.3546</b> | 447.9055        |
|         | <b>1034.3979</b> | 517.7026         | 345.4708        | 9  | I      | 10 | 1284.6805        | <b>642.8439</b> | 428.8984        |
|         | 1148.4408        | 574.7241         | 383.4851        | 10 | N      | 9  | <b>1171.5964</b> | <b>586.3019</b> | <b>391.2037</b> |
|         | 1263.4678        | <b>632.2375</b>  | 421.8274        | 11 | D      | 8  | <b>1057.5535</b> | 529.2804        | 353.1894        |
|         | 1399.5769        | 700.2921         | 467.1972        | 12 | K[136] | 7  | <b>942.5266</b>  | 471.7669        | 314.8470        |
|         | 1546.6453        | 773.8263         | 516.2200        | 13 | F      | 6  | <b>806.4174</b>  | 403.7123        | 269.4773        |
|         | 1693.7137        | <b>847.3605</b>  | 565.2428        | 14 | F      | 5  | <b>659.3490</b>  | 330.1781        | 220.4545        |
|         | 1808.7407        | <b>904.8740</b>  | <b>603.5851</b> | 15 | D      | 4  | 512.2806         | 256.6439        | 171.4317        |
|         | 1921.8247        | <b>961.4160</b>  | <b>641.2798</b> | 16 | L      | 3  | <b>397.2536</b>  | 199.1305        | 133.0894        |
|         | 2050.8673        | <b>1025.9373</b> | <b>684.2940</b> | 17 | E      | 2  | 284.1696         | 142.5884        | 95.3947         |
|         |                  |                  |                 | 18 | K[136] | 1  | 155.1270         | 78.0671         | 52.3805         |

# Annotated spectra from Saleem et. al. 2009

K.HTAELEDT<sub>181</sub>PS<sub>167</sub>DGIEEHL<sub>SAR</sub>.K/3

0.9556

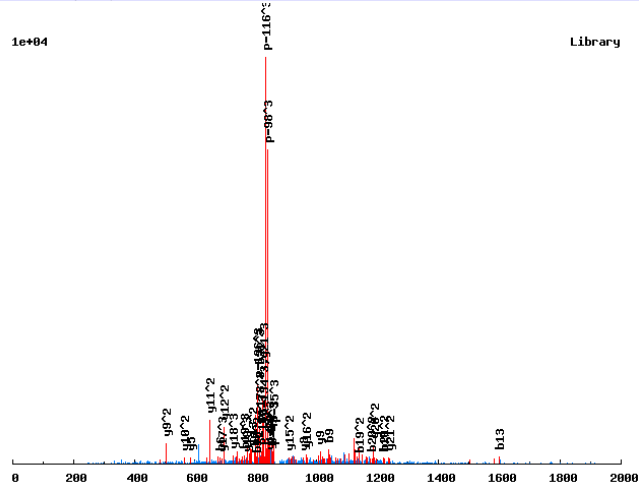

| Library | b <sup>1+</sup> | b <sup>2+</sup> | b <sup>3+</sup> | #  | AA     | #  | y <sup>1+</sup> | y <sup>2+</sup> | y <sup>3+</sup> |
|---------|-----------------|-----------------|-----------------|----|--------|----|-----------------|-----------------|-----------------|
|         | 138.0662        | 69.5367         | 46.6936         | 1  | H      | 22 |                 |                 |                 |
|         | 239.1139        | 120.0606        | 80.3761         | 2  | T      | 21 | 2473.9643       | 1237.4858       | 825.3263        |
|         | 310.1510        | 155.5791        | 104.0552        | 3  | A      | 20 | 2372.9167       | 1186.9620       | 791.6437        |
|         | 439.1936        | 220.1004        | 147.0694        | 4  | E      | 19 | 2301.8795       | 1151.4434       | 767.9647        |
|         | 554.2205        | 277.6139        | 185.4117        | 5  | D      | 18 | 2172.8370       | 1086.9221       | 724.9505        |
|         | 683.2631        | 342.1352        | 228.4259        | 6  | E      | 17 | 2057.8100       | 1029.4086       | 686.6082        |
|         | 796.3472        | 398.6772        | 266.1206        | 7  | L      | 16 | 1928.7674       | 964.8874        | 643.5940        |
|         | 925.3898        | 463.1985        | 309.1348        | 8  | E      | 15 | 1815.6834       | 908.3453        | 605.8993        |
|         | 1040.4167       | 520.7120        | 347.4771        | 9  | D      | 14 | 1686.6408       | 843.8240        | 562.8851        |
|         | 1221.4307       | 611.2190        | 407.8151        | 10 | T[181] | 13 | 1571.6138       | 786.3106        | 524.5428        |
|         | 1318.4835       | 659.7454        | 440.1660        | 11 | P      | 12 | 1390.5998       | 695.8036        | 464.2048        |
|         | 1485.4818       | 743.2446        | 495.8321        | 12 | S[167] | 11 | 1293.5471       | 647.2772        | 431.8539        |
|         | 1600.5088       | 800.7580        | 534.1744        | 13 | D      | 10 | 1126.5487       | 563.7780        | 376.1878        |
|         | 1657.5302       | 829.2688        | 553.1816        | 14 | G      | 9  | 1011.5218       | 506.2645        | 337.8454        |
|         | 1770.6143       | 885.8108        | 590.8763        | 15 | I      | 8  | 954.5003        | 477.7538        | 318.8383        |
|         | 1899.6569       | 950.3321        | 633.8905        | 16 | E      | 7  | 841.4162        | 421.2118        | 281.1436        |
|         | 2028.6995       | 1014.8534       | 676.9047        | 17 | E      | 6  | 712.3737        | 356.6905        | 238.1294        |
|         | 2165.7584       | 1083.3828       | 722.5910        | 18 | H      | 5  | 583.3311        | 292.1692        | 195.1152        |
|         | 2278.8424       | 1139.9249       | 760.2857        | 19 | L      | 4  | 446.2721        | 223.6397        | 149.4289        |
|         | 2365.8745       | 1183.4409       | 789.2963        | 20 | S      | 3  | 333.1881        | 167.0977        | 111.7342        |
|         | 2436.9116       | 1218.9594       | 812.9754        | 21 | A      | 2  | 246.1561        | 123.5817        | 82.7235         |
|         |                 |                 |                 | 22 | R      | 1  | 175.1190        | 88.0631         | 59.0445         |

# Annotated spectra from Saleem et. al. 2009

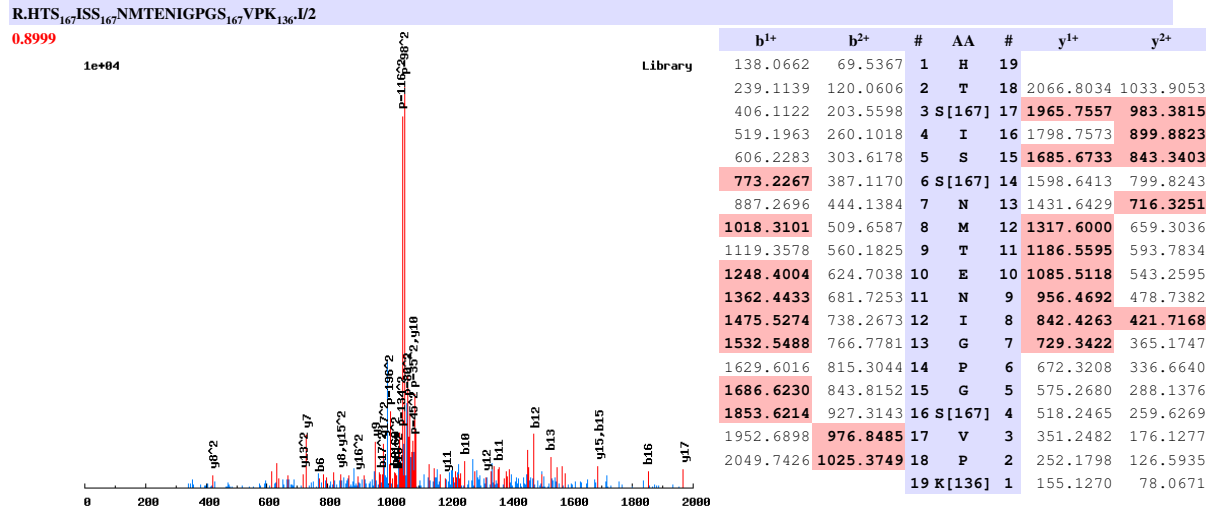



### Annotated spectra from Saleem et. al. 2009

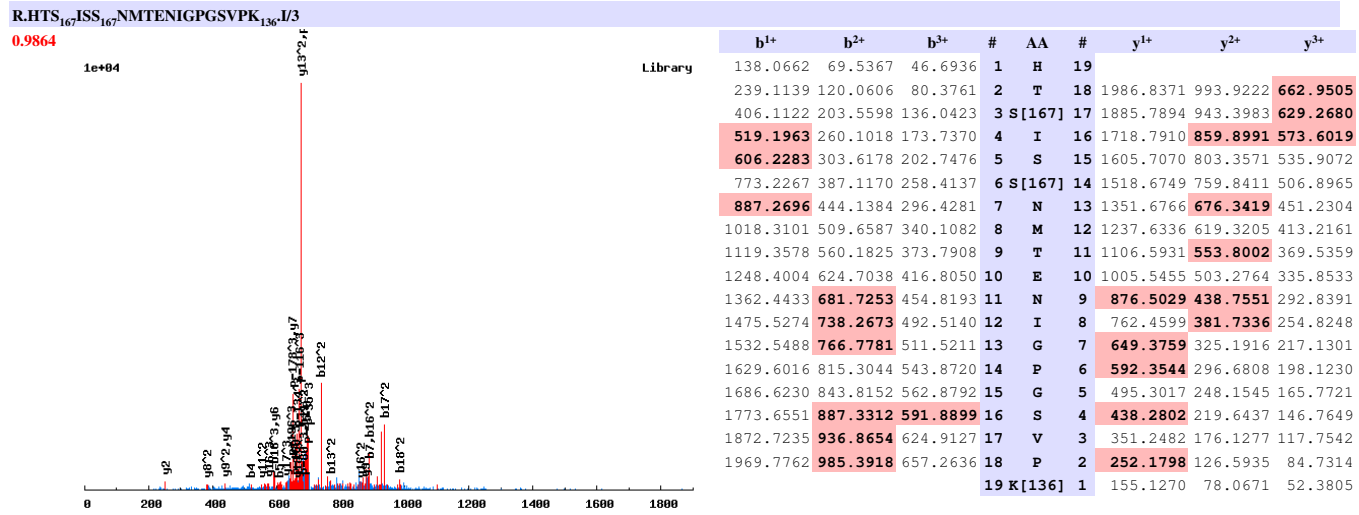

# Annotated spectra from Saleem et. al. 2009

R.HVIADLEDHESS<sub>167</sub>DEEGT<sub>181</sub>ALPK<sub>136</sub>K/3

0.9995

1e+04

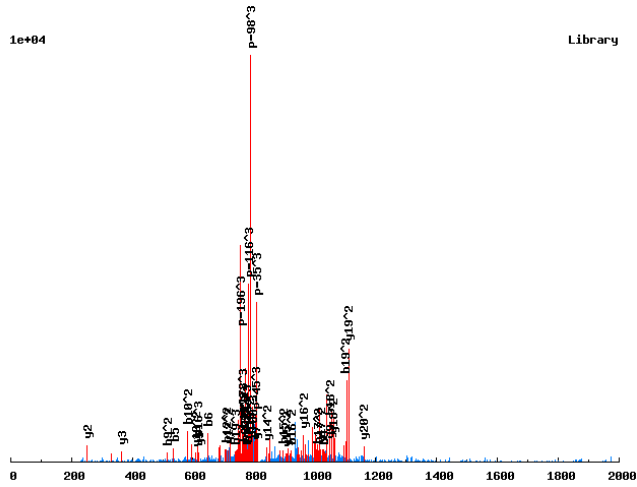

| Library | b <sup>1+</sup> | b <sup>2+</sup> | b <sup>3+</sup> | #  | AA     | #  | y <sup>1+</sup> | y <sup>2+</sup> | y <sup>3+</sup> |
|---------|-----------------|-----------------|-----------------|----|--------|----|-----------------|-----------------|-----------------|
|         | 138.0662        | 69.5367         | 46.6936         | 1  | H      | 21 |                 |                 |                 |
|         | 237.1346        | 119.0709        | 79.7164         | 2  | V      | 20 | 2322.9505       | 1161.9789       | 774.9884        |
|         | 350.2187        | 175.6130        | 117.4111        | 3  | I      | 19 | 2223.8821       | 1112.4447       | 741.9656        |
|         | 421.2558        | 211.1315        | 141.0901        | 4  | A      | 18 | 2110.7981       | 1055.9027       | 704.2709        |
|         | 536.2827        | 268.6450        | 179.4324        | 5  | D      | 17 | 2039.7609       | 1020.3841       | 680.5918        |
|         | 649.3668        | 325.1870        | 217.1271        | 6  | L      | 16 | 1924.7340       | 962.8706        | 642.2495        |
|         | 778.4094        | 389.7083        | 260.1413        | 7  | E      | 15 | 1811.6499       | 906.3286        | 604.5548        |
|         | 893.4363        | 447.2218        | 298.4836        | 8  | D      | 14 | 1682.6074       | 841.8073        | 561.5406        |
|         | 1030.4952       | 515.7512        | 344.1699        | 9  | H      | 13 | 1567.5804       | 784.2938        | 523.1983        |
|         | 1159.5378       | 580.2725        | 387.1841        | 10 | E      | 12 | 1430.5215       | 715.7644        | 477.5120        |
|         | 1246.5698       | 623.7886        | 416.1948        | 11 | S      | 11 | 1301.4789       | 651.2431        | 434.4978        |
|         | 1413.5682       | 707.2877        | 471.8609        | 12 | S[167] | 10 | 1214.4469       | 607.7271        | 405.4871        |
|         | 1528.5951       | 764.8012        | 510.2032        | 13 | D      | 9  | 1047.4485       | 524.2279        | 349.8210        |
|         | 1657.6377       | 829.3225        | 553.2174        | 14 | E      | 8  | 932.4216        | 466.7144        | 311.4787        |
|         | 1786.6803       | 893.8438        | 596.2316        | 15 | E      | 7  | 803.3790        | 402.1931        | 268.4645        |
|         | 1843.7018       | 922.3545        | 615.2388        | 16 | G      | 6  | 674.3364        | 337.6718        | 225.4503        |
|         | 2024.7158       | 1012.8615       | 675.5768        | 17 | T[181] | 5  | 617.3149        | 309.1611        | 206.4432        |
|         | 2095.7529       | 1048.3801       | 699.2558        | 18 | A      | 4  | 436.3009        | 218.6541        | 146.1052        |
|         | 2208.8370       | 1104.9221       | 736.9505        | 19 | L      | 3  | 365.2638        | 183.1355        | 122.4261        |
|         | 2305.8897       | 1153.4485       | 769.3014        | 20 | P      | 2  | 252.1798        | 126.5935        | 84.7314         |
|         |                 |                 |                 | 21 | K[136] | 1  | 155.1270        | 78.0671         | 52.3805         |

# Annotated spectra from Saleem et. al. 2009

R.HVIT<sub>181</sub>DDEEEQR<sub>166</sub>R<sub>166</sub>-H/3

0.998

1e+04

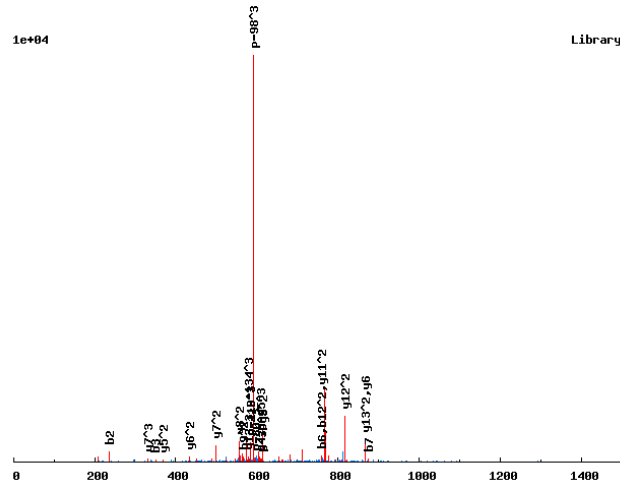

| Library | b <sup>1+</sup> | b <sup>2+</sup> | b <sup>3+</sup> | #  | AA     | #  | y <sup>1+</sup> | y <sup>2+</sup> | y <sup>3+</sup> |
|---------|-----------------|-----------------|-----------------|----|--------|----|-----------------|-----------------|-----------------|
|         | 138.0662        | 69.5367         | 46.6936         | 1  | H      | 14 |                 |                 |                 |
|         | <b>237.1346</b> | 119.0709        | 79.7164         | 2  | V      | 13 | 1731.7700       | <b>866.3886</b> | <b>577.9282</b> |
|         | <b>350.2187</b> | 175.6130        | 117.4111        | 3  | I      | 12 | 1632.7015       | <b>816.8544</b> | 544.9054        |
|         | 463.3027        | 232.1550        | 155.1058        | 4  | I      | 11 | 1519.6175       | <b>760.3124</b> | 507.2107        |
|         | 644.3167        | 322.6620        | 215.4438        | 5  | T[181] | 10 | 1406.5334       | 703.7704        | 469.5160        |
|         | <b>759.3437</b> | 380.1755        | 253.7861        | 6  | D      | 9  | 1225.5194       | <b>613.2633</b> | 409.1780        |
|         | <b>874.3706</b> | 437.6889        | 292.1284        | 7  | D      | 8  | 1110.4925       | <b>555.7499</b> | 370.8357        |
|         | 1003.4132       | 502.2102        | 335.1426        | 8  | E      | 7  | 995.4655        | <b>498.2364</b> | <b>332.4934</b> |
|         | 1132.4558       | <b>566.7315</b> | 378.1568        | 9  | E      | 6  | <b>866.4229</b> | <b>433.7151</b> | 289.4792        |
|         | 1261.4984       | 631.2528        | 421.1710        | 10 | E      | 5  | 737.3804        | <b>369.1938</b> | 246.4650        |
|         | 1390.5410       | 695.7741        | 464.1852        | 11 | E      | 4  | <b>608.3378</b> | 304.6725        | 203.4508        |
|         | 1518.5996       | <b>759.8034</b> | 506.8714        | 12 | Q      | 3  | 479.2952        | 240.1512        | 160.4366        |
|         | 1684.7089       | 842.8581        | 562.2412        | 13 | R[166] | 2  | 351.2366        | 176.1219        | 117.7504        |
|         |                 |                 |                 | 14 | R[166] | 1  | 185.1272        | 93.0672         | 62.3806         |

# Annotated spectra from Saleem et. al. 2009

R.HVS<sub>167</sub>R<sub>166</sub>S<sub>167</sub>SDITANDSSDEK<sub>136</sub>W/3

0.9886

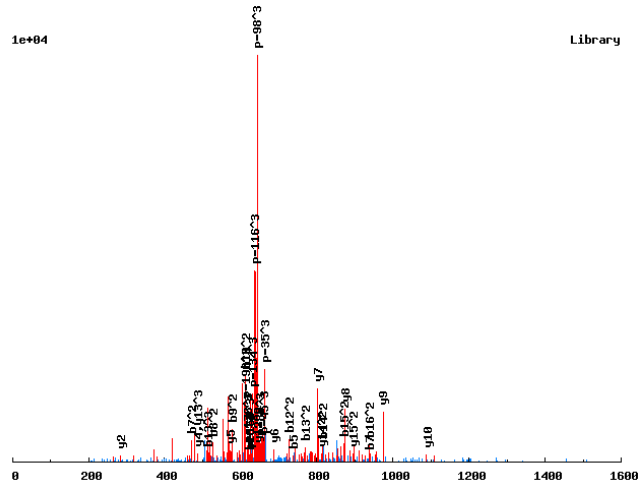

| Library | b <sup>1+</sup> | b <sup>2+</sup> | b <sup>3+</sup> | #  | AA     | #  | y <sup>1+</sup> | y <sup>2+</sup> | y <sup>3+</sup> |
|---------|-----------------|-----------------|-----------------|----|--------|----|-----------------|-----------------|-----------------|
|         | 138.0662        | 69.5367         | 46.6936         | 1  | H      | 17 |                 |                 |                 |
|         | 237.1346        | 119.0709        | 79.7164         | 2  | V      | 16 | 1888.7328       | 944.8700        | 630.2491        |
|         | 404.1330        | 202.5701        | 135.3825        | 3  | S[167] | 15 | 1789.6644       | 895.3358        | 597.2263        |
|         | 570.2423        | 285.6248        | 190.7523        | 4  | R[166] | 14 | 1622.6660       | 811.8366        | 541.5602        |
|         | 737.2407        | 369.1240        | 246.4184        | 5  | S[167] | 13 | 1456.5566       | 728.7820        | 486.1904        |
|         | 824.2727        | 412.6400        | 275.4291        | 6  | S      | 12 | 1289.5583       | 645.2828        | 430.5243        |
|         | 939.2997        | 470.1535        | 313.7714        | 7  | D      | 11 | 1202.5262       | 601.7668        | 401.5136        |
|         | 1052.3837       | 526.6955        | 351.4661        | 8  | I      | 10 | 1087.4993       | 544.2533        | 363.1713        |
|         | 1153.4314       | 577.2193        | 385.1487        | 9  | T      | 9  | 974.4152        | 487.7113        | 325.4766        |
|         | 1224.4685       | 612.7379        | 408.8277        | 10 | A      | 8  | 873.3676        | 437.1874        | 291.7940        |
|         | 1338.5115       | 669.7594        | 446.8420        | 11 | N      | 7  | 802.3305        | 401.6689        | 268.1150        |
|         | 1453.5384       | 727.2728        | 485.1843        | 12 | D      | 6  | 688.2875        | 344.6474        | 230.1007        |
|         | 1540.5704       | 770.7889        | 514.1950        | 13 | S      | 5  | 573.2606        | 287.1339        | 191.7584        |
|         | 1627.6025       | 814.3049        | 543.2057        | 14 | S      | 4  | 486.2286        | 243.6179        | 162.7477        |
|         | 1742.6294       | 871.8183        | 581.5480        | 15 | D      | 3  | 399.1965        | 200.1019        | 133.7370        |
|         | 1871.6720       | 936.3396        | 624.5622        | 16 | E      | 2  | 284.1696        | 142.5884        | 95.3947         |
|         |                 |                 |                 | 17 | K[136] | 1  | 155.1270        | 78.0671         | 52.3805         |

# Annotated spectra from Saleem et. al. 2009

R.HVTFDK<sub>136</sub>LDES<sub>167</sub>DENEELAK<sub>136</sub>A/3

0.9971

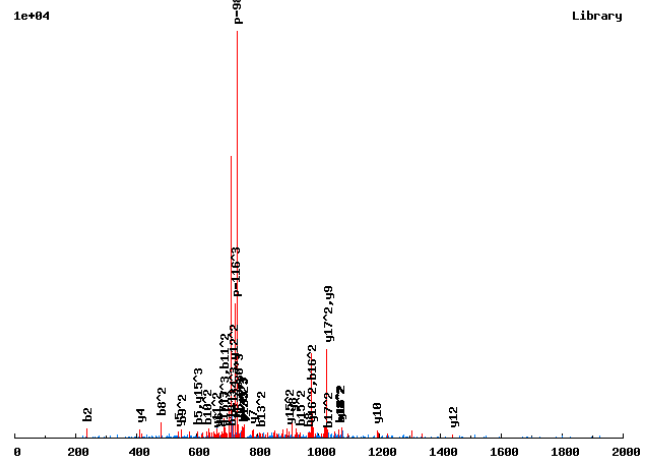

| Library | b <sup>1+</sup> | b <sup>2+</sup>  | b <sup>3+</sup> | #  | AA     | #  | y <sup>1+</sup>  | y <sup>2+</sup>  | y <sup>3+</sup> |
|---------|-----------------|------------------|-----------------|----|--------|----|------------------|------------------|-----------------|
|         | 138.0662        | 69.5367          | 46.6936         | 1  | H      | 19 |                  |                  |                 |
|         | <b>237.1346</b> | 119.0709         | 79.7164         | 2  | V      | 18 | 2148.9555        | <b>1074.9814</b> | 716.9900        |
|         | 338.1823        | 169.5948         | 113.3989        | 3  | T      | 17 | 2049.8871        | <b>1025.4472</b> | <b>683.9672</b> |
|         | 485.2507        | 243.1290         | 162.4218        | 4  | F      | 16 | 1948.8394        | <b>974.9233</b>  | 650.2846        |
|         | <b>600.2776</b> | 300.6425         | 200.7641        | 5  | D      | 15 | 1801.7710        | <b>901.3891</b>  | <b>601.2618</b> |
|         | <b>736.3868</b> | 368.6970         | 246.1338        | 6  | K[136] | 14 | 1686.7440        | 843.8757         | 562.9195        |
|         | 849.4708        | 425.2391         | 283.8285        | 7  | L      | 13 | 1550.6349        | 775.8211         | 517.5498        |
|         | <b>964.4978</b> | <b>482.7525</b>  | 322.1708        | 8  | D      | 12 | <b>1437.5508</b> | <b>719.2790</b>  | 479.8551        |
|         | 1093.5404       | <b>547.2738</b>  | 365.1850        | 9  | E      | 11 | 1322.5239        | <b>661.7656</b>  | 441.5128        |
|         | 1260.5387       | <b>630.7730</b>  | 420.8511        | 10 | S[167] | 10 | <b>1193.4813</b> | 597.2443         | 398.4986        |
|         | 1375.5657       | <b>688.2865</b>  | 459.1934        | 11 | D      | 9  | <b>1026.4829</b> | 513.7451         | 342.8325        |
|         | 1504.6083       | <b>752.8078</b>  | 502.2076        | 12 | E      | 8  | <b>911.4560</b>  | 456.2316         | 304.4902        |
|         | 1618.6512       | <b>809.8292</b>  | 540.2219        | 13 | N      | 7  | <b>782.4134</b>  | 391.7103         | 261.4760        |
|         | 1747.6938       | 874.3505         | 583.2361        | 14 | E      | 6  | <b>668.3705</b>  | 334.6889         | 223.4617        |
|         | 1876.7364       | <b>938.8718</b>  | 626.2503        | 15 | E      | 5  | <b>539.3279</b>  | 270.1676         | 180.4475        |
|         | 1947.7735       | <b>974.3904</b>  | 649.9294        | 16 | A      | 4  | <b>410.2853</b>  | 205.6463         | 137.4333        |
|         | 2060.8576       | <b>1030.9324</b> | <b>687.6240</b> | 17 | L      | 3  | 339.2482         | 170.1277         | 113.7542        |
|         | 2131.8947       | <b>1066.4510</b> | <b>711.3031</b> | 18 | A      | 2  | 226.1641         | 113.5857         | 76.0596         |
|         |                 |                  |                 | 19 | K[136] | 1  | 155.1270         | 78.0671          | 52.3805         |

# Annotated spectra from Saleem et. al. 2009

K.HY<sub>243</sub>M<sub>147</sub>DS<sub>167</sub>S<sub>167</sub>K<sub>136</sub>N/3

0.9128

1e+04

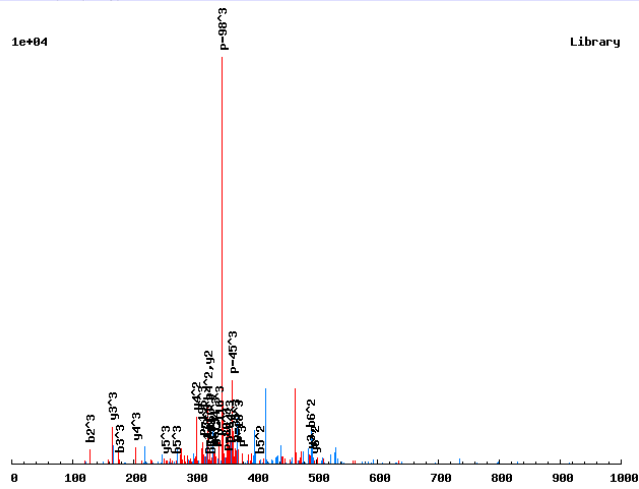

| Library | b <sup>1+</sup> | b <sup>2+</sup> | b <sup>3+</sup> | # | AA     | # | y <sup>1+</sup> | y <sup>2+</sup> | y <sup>3+</sup> |
|---------|-----------------|-----------------|-----------------|---|--------|---|-----------------|-----------------|-----------------|
|         | 138.0662        | 69.5367         | 46.6936         | 1 | H      | 7 |                 |                 |                 |
|         | 381.0959        | 191.0516        | 127.7035        | 2 | Y[243] | 6 | 994.2157        | 497.6115        | 332.0768        |
|         | 528.1313        | 264.5693        | 176.7153        | 3 | M[147] | 5 | 751.1861        | 376.0967        | 251.0669        |
|         | 643.1582        | 322.0827        | 215.0576        | 4 | D      | 4 | 604.1507        | 302.5790        | 202.0551        |
|         | 810.1566        | 405.5819        | 270.7237        | 5 | S[167] | 3 | 489.1237        | 245.0655        | 163.7128        |
|         | 977.1549        | 489.0811        | 326.3898        | 6 | S[167] | 2 | 322.1254        | 161.5663        | 108.0466        |
|         |                 |                 |                 | 7 | K[136] | 1 | 155.1270        | 78.0671         | 52.3805         |

# Annotated spectra from Saleem et. al. 2009

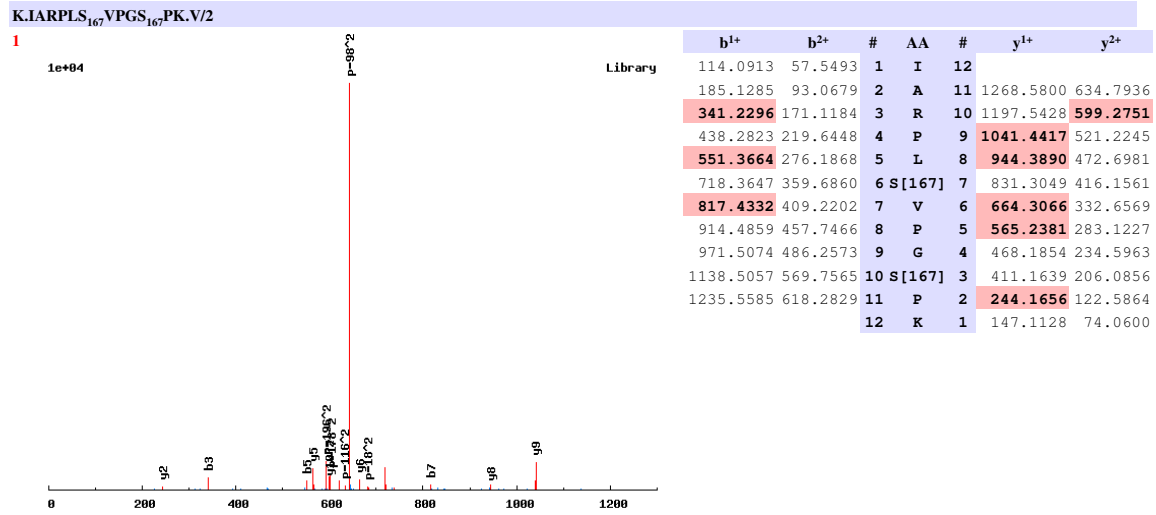

# Annotated spectra from Saleem et. al. 2009

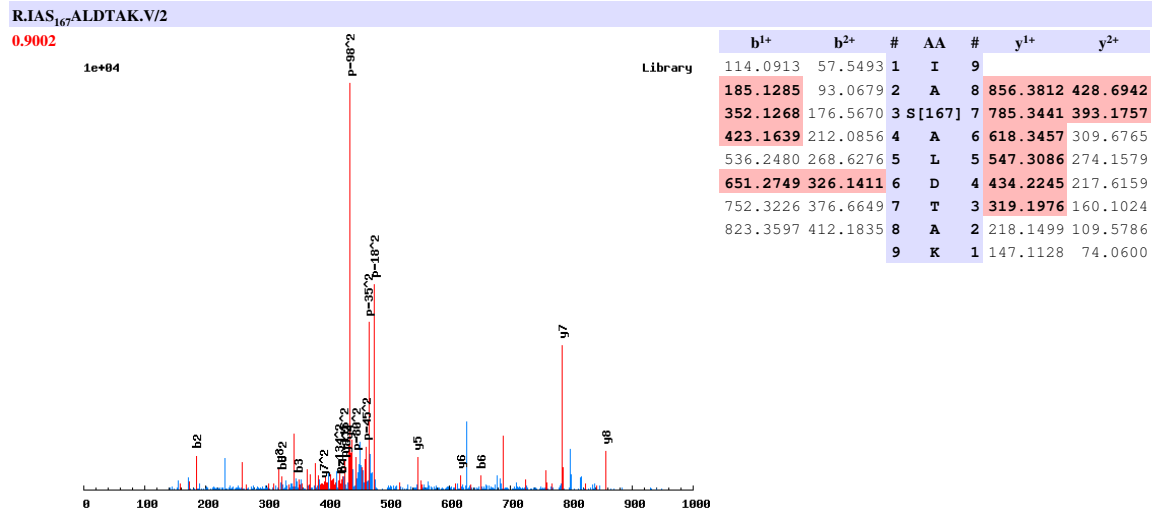



# Annotated spectra from Saleem et. al. 2009

R.IAS<sub>167</sub>-PIQHEHDSGSR.I/2

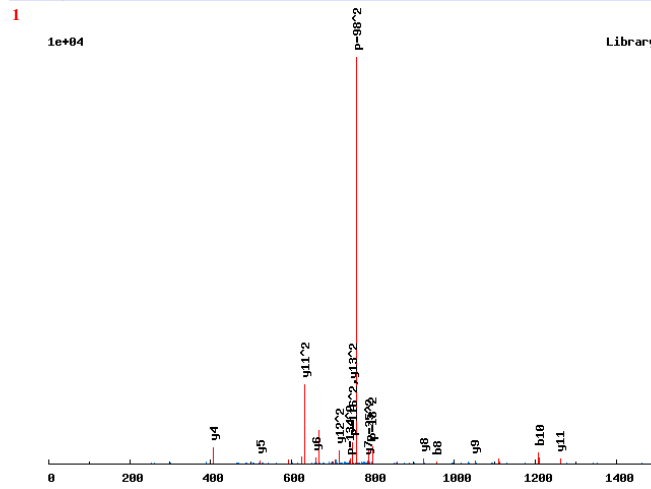

| Library | b <sup>1+</sup> | b <sup>2+</sup> | #  | AA     | #  | y <sup>1+</sup> | y <sup>2+</sup> |
|---------|-----------------|-----------------|----|--------|----|-----------------|-----------------|
|         | 114.0913        | 57.5493         | 1  | I      | 14 |                 |                 |
|         | 185.1285        | 93.0679         | 2  | A      | 13 | 1500.6227       | 750.8150        |
|         | 352.1268        | 176.5670        | 3  | S[167] | 12 | 1429.5856       | 715.2964        |
|         | 449.1796        | 225.0934        | 4  | P      | 11 | 1262.5872       | 631.7973        |
|         | 562.2636        | 281.6355        | 5  | I      | 10 | 1165.5345       | 583.2709        |
|         | 690.3222        | 345.6647        | 6  | Q      | 9  | 1052.4504       | 526.7288        |
|         | 827.3811        | 414.1942        | 7  | H      | 8  | 924.3918        | 462.6995        |
|         | 956.4237        | 478.7155        | 8  | E      | 7  | 787.3329        | 394.1701        |
|         | 1093.4826       | 547.2450        | 9  | H      | 6  | 658.2903        | 329.6488        |
|         | 1208.5096       | 604.7584        | 10 | D      | 5  | 521.2314        | 261.1193        |
|         | 1295.5416       | 648.2744        | 11 | S      | 4  | 406.2045        | 203.6059        |
|         | 1352.5631       | 676.7852        | 12 | G      | 3  | 319.1724        | 160.0899        |
|         | 1439.5951       | 720.3012        | 13 | S      | 2  | 262.1510        | 131.5791        |
|         |                 |                 | 14 | R      | 1  | 175.1190        | 88.0631         |

# Annotated spectra from Saleem et. al. 2009

R.IAS<sub>167</sub>PIQHEHDS<sub>167</sub>GS<sub>167</sub>R.I/2

0.8249

1e+04

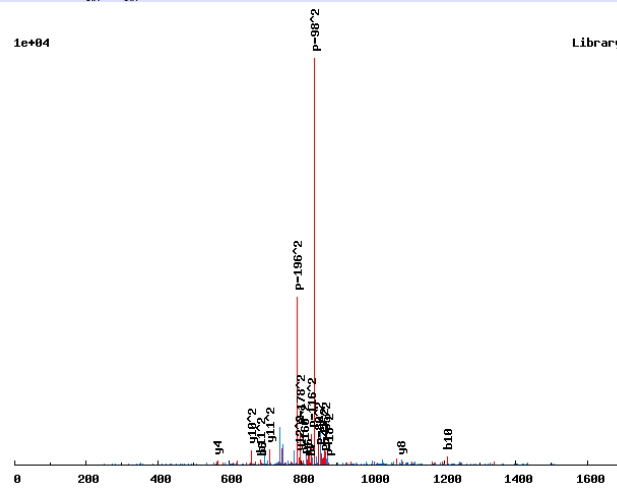

| Library | b <sup>1+</sup> | b <sup>2+</sup> | #  | AA     | #  | y <sup>1+</sup> | y <sup>2+</sup> |
|---------|-----------------|-----------------|----|--------|----|-----------------|-----------------|
|         | 114.0913        | 57.5493         | 1  | I      | 14 |                 |                 |
|         | 185.1285        | 93.0679         | 2  | A      | 13 | 1660.5554       | 830.7813        |
|         | 352.1268        | 176.5670        | 3  | S[167] | 12 | 1589.5182       | 795.2628        |
|         | 449.1796        | 225.0934        | 4  | P      | 11 | 1422.5199       | 711.7636        |
|         | 562.2636        | 281.6355        | 5  | I      | 10 | 1325.4671       | 663.2372        |
|         | 690.3222        | 345.6647        | 6  | Q      | 9  | 1212.3831       | 606.6952        |
|         | 827.3811        | 414.1942        | 7  | H      | 8  | 1084.3245       | 542.6659        |
|         | 956.4237        | 478.7155        | 8  | E      | 7  | 947.2656        | 474.1364        |
|         | 1093.4826       | 547.2450        | 9  | H      | 6  | 818.2230        | 409.6151        |
|         | 1208.5096       | 604.7584        | 10 | D      | 5  | 681.1641        | 341.0857        |
|         | 1375.5079       | 688.2576        | 11 | S[167] | 4  | 566.1371        | 283.5722        |
|         | 1432.5294       | 716.7683        | 12 | G      | 3  | 399.1388        | 200.0730        |
|         | 1599.5277       | 800.2675        | 13 | S[167] | 2  | 342.1173        | 171.5623        |
|         |                 |                 | 14 | R      | 1  | 175.1190        | 88.0631         |

# Annotated spectra from Saleem et. al. 2009

R.IASPIQHEHDSGS<sub>167</sub>RIAS<sub>167</sub>PIQQQQDPTTNLLK.N/4

0.9605

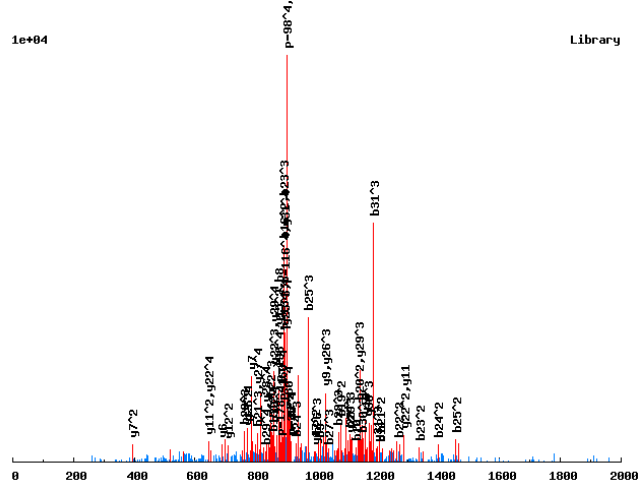

| Library | b <sup>1+</sup> | b <sup>2+</sup> | b <sup>3+</sup> | b <sup>4+</sup> | #  | AA     | #  | y <sup>1+</sup> | y <sup>2+</sup> | y <sup>3+</sup> | y <sup>4+</sup> |
|---------|-----------------|-----------------|-----------------|-----------------|----|--------|----|-----------------|-----------------|-----------------|-----------------|
|         | 114.0913        | 57.5493         | 38.7020         | 47.0376         | 1  | I      | 32 |                 |                 |                 |                 |
|         | 185.1285        | 93.0679         | 62.3810         | 47.0376         | 2  | A      | 31 | 3584.6530       | 1792.8301       | 1195.5559       | 896.9187        |
|         | 272.1605        | 136.5839        | 91.3917         | 68.7956         | 3  | S      | 30 | 3513.6159       | 1757.3116       | 1171.8768       | 879.1594        |
|         | 369.2132        | 185.1103        | 123.7426        | 93.0588         | 4  | P      | 29 | 3426.5839       | 1713.7956       | 1142.8661       | 857.4014        |
|         | 482.2973        | 241.6523        | 161.4373        | 121.3298        | 5  | I      | 28 | 3329.5311       | 1665.2692       | 1110.5152       | 833.1382        |
|         | 610.3559        | 305.6816        | 204.1235        | 153.3444        | 6  | Q      | 27 | 3216.4471       | 1608.7272       | 1072.8205       | 804.8672        |
|         | 747.4148        | 374.2110        | 249.8098        | 187.6092        | 7  | H      | 26 | 3088.3885       | 1544.6979       | 1030.1343       | 772.8526        |
|         | 876.4574        | 438.7323        | 292.8240        | 219.8698        | 8  | E      | 25 | 2951.3296       | 1476.1684       | 984.4480        | 738.5879        |
|         | 1013.5163       | 507.2618        | 338.5103        | 254.1345        | 9  | H      | 24 | 2822.2870       | 1411.6471       | 941.4338        | 706.3272        |
|         | 1128.5432       | 564.7753        | 376.8526        | 282.8913        | 10 | D      | 23 | 2685.2281       | 1343.1177       | 895.7475        | 672.0625        |
|         | 1215.5753       | 608.2913        | 405.8633        | 304.6493        | 11 | S      | 22 | 2570.2011       | 1285.6042       | 857.4052        | 643.3057        |
|         | 1272.5967       | 636.8020        | 424.8704        | 318.9046        | 12 | G      | 21 | 2483.1691       | 1242.0882       | 828.3946        | 621.5477        |
|         | 1439.5951       | 720.3012        | 480.5365        | 360.6542        | 13 | S[167] | 20 | 2426.1476       | 1213.5775       | 809.3874        | 607.2924        |
|         | 1595.6962       | 798.3517        | 532.5703        | 399.6795        | 14 | R      | 19 | 2259.1493       | 1130.0783       | 753.7213        | 565.5428        |
|         | 1708.7803       | 854.8938        | 570.2649        | 427.9505        | 15 | I      | 18 | 2103.0482       | 1052.0277       | 701.6876        | 526.5175        |
|         | 1779.8174       | 890.4123        | 593.9440        | 445.7098        | 16 | A      | 17 | 1989.9641       | 995.4857        | 663.9929        | 498.2465        |
|         | 1946.8157       | 973.9115        | 649.6101        | 487.4594        | 17 | S[167] | 16 | 1918.9270       | 959.9671        | 640.3139        | 480.4872        |
|         | 2043.8685       | 1022.4379       | 681.9610        | 511.7226        | 18 | P      | 15 | 1751.9286       | 876.4680        | 584.6477        | 438.7376        |
|         | 2156.9525       | 1078.9799       | 719.6557        | 539.9936        | 19 | I      | 14 | 1654.8759       | 827.9416        | 552.2968        | 414.4744        |
|         | 2285.0111       | 1143.0092       | 762.3419        | 572.0082        | 20 | Q      | 13 | 1541.7918       | 771.3995        | 514.6021        | 386.2034        |
|         | 2413.0697       | 1207.0385       | 805.0281        | 604.0229        | 21 | Q      | 12 | 1413.7332       | 707.3703        | 471.9159        | 354.1888        |
|         | 2541.1283       | 1271.0678       | 847.7143        | 636.0375        | 22 | Q      | 11 | 1285.6746       | 643.3410        | 429.2297        | 322.1741        |
|         | 2669.1869       | 1335.0971       | 890.4005        | 668.0522        | 23 | Q      | 10 | 1157.6161       | 579.3117        | 386.5435        | 290.1595        |
|         | 2797.2454       | 1399.1264       | 933.0867        | 700.0668        | 24 | Q      | 9  | 1029.5575       | 515.2824        | 343.8574        | 258.1448        |
|         | 2912.2724       | 1456.6398       | 971.4290        | 728.8236        | 25 | D      | 8  | 901.4989        | 451.2531        | 301.1712        | 226.1302        |
|         | 3009.3251       | 1505.1662       | 1003.7799       | 753.0867        | 26 | P      | 7  | 786.4720        | 393.7396        | 262.8288        | 197.3735        |
|         | 3110.3728       | 1555.6901       | 1037.4625       | 778.3487        | 27 | T      | 6  | 689.4192        | 345.2132        | 230.4779        | 173.1103        |
|         | 3211.4205       | 1606.2139       | 1071.1450       | 803.6106        | 28 | T      | 5  | 588.3715        | 294.6894        | 196.7954        | 147.8483        |
|         | 3325.4634       | 1663.2354       | 1109.1593       | 832.1213        | 29 | N      | 4  | 487.3238        | 244.1656        | 163.1128        | 122.5864        |
|         | 3438.5475       | 1719.7774       | 1146.8540       | 860.3923        | 30 | L      | 3  | 373.2809        | 187.1441        | 125.0985        | 94.0757         |
|         | 3551.6316       | 1776.3194       | 1184.5487       | 888.6633        | 31 | L      | 2  | 260.1969        | 130.6021        | 87.4038         | 65.8047         |
|         |                 |                 |                 |                 | 32 | K      | 1  | 147.1128        | 74.0600         | 49.7091         | 37.5337         |

# Annotated spectra from Saleem et. al. 2009

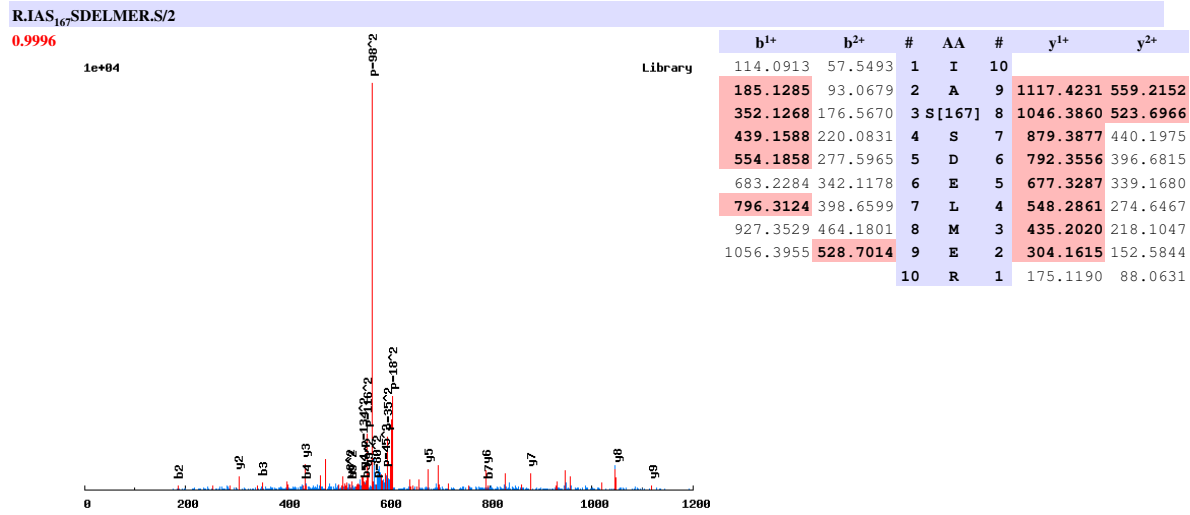

Annotated spectra from Saleem et. al. 2009

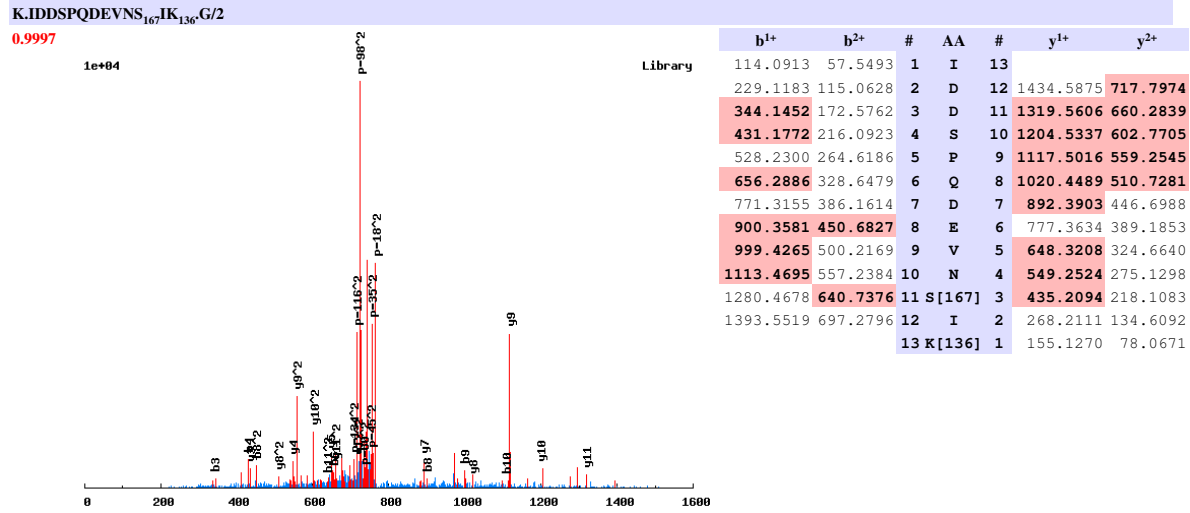

Annotated spectra from Saleem et. al. 2009

K.IDDS<sub>167</sub>PQDEVNS<sub>167</sub>IKGKPADK.A/3

0.9517

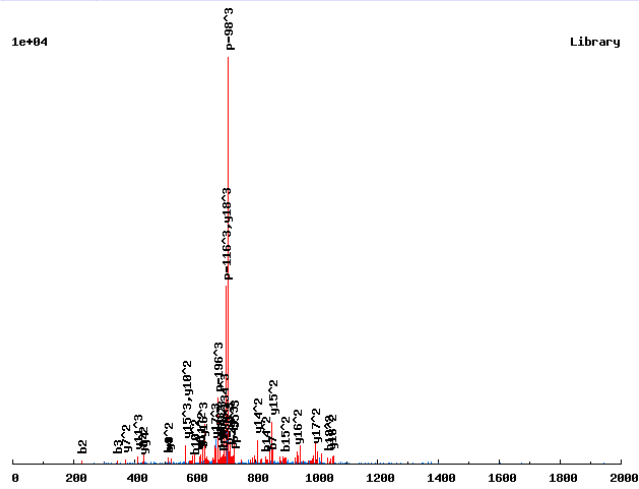

| Library | b <sup>1+</sup> | b <sup>2+</sup>  | b <sup>3+</sup> | #  | AA     | #  | y <sup>1+</sup> | y <sup>2+</sup>  | y <sup>3+</sup> |
|---------|-----------------|------------------|-----------------|----|--------|----|-----------------|------------------|-----------------|
|         | 114.0913        | 57.5493          | 38.7020         | 1  | I      | 19 |                 |                  |                 |
|         | <b>229.1183</b> | 115.0628         | 77.0443         | 2  | D      | 18 | 2102.8679       | <b>1051.9376</b> | <b>701.6275</b> |
|         | <b>344.1452</b> | 172.5762         | 115.3866        | 3  | D      | 17 | 1987.8409       | <b>994.4241</b>  | <b>663.2852</b> |
|         | <b>511.1436</b> | 256.0754         | 171.0527        | 4  | S[167] | 16 | 1872.8140       | <b>936.9106</b>  | <b>624.9428</b> |
|         | 608.1963        | 304.6018         | 203.4036        | 5  | P      | 15 | 1705.8156       | <b>853.4115</b>  | <b>569.2767</b> |
|         | 736.2549        | 368.6311         | 246.0898        | 6  | Q      | 14 | 1608.7629       | <b>804.8851</b>  | 536.9258        |
|         | <b>851.2819</b> | 426.1446         | 284.4321        | 7  | D      | 13 | 1480.7043       | 740.8558         | 494.2396        |
|         | 980.3245        | 490.6659         | 327.4463        | 8  | E      | 12 | 1365.6773       | <b>683.3423</b>  | 455.8973        |
|         | 1079.3929       | 540.2001         | 360.4691        | 9  | V      | 11 | 1236.6348       | <b>618.8210</b>  | <b>412.8831</b> |
|         | 1193.4358       | <b>597.2215</b>  | 398.4835        | 10 | N      | 10 | 1137.5663       | <b>569.2868</b>  | 379.8603        |
|         | 1360.4342       | 680.7207         | 454.1496        | 11 | S[167] | 9  | 1023.5234       | <b>512.2653</b>  | 341.8460        |
|         | 1473.5182       | 737.2627         | 491.8443        | 12 | I      | 8  | 856.5251        | <b>428.7662</b>  | 286.1799        |
|         | 1601.6132       | 801.3102         | 534.5426        | 13 | K      | 7  | 743.4410        | <b>372.2241</b>  | 248.4852        |
|         | 1658.6346       | <b>829.8210</b>  | 553.5497        | 14 | G      | 6  | <b>615.3460</b> | 308.1767         | 205.7869        |
|         | 1786.7296       | <b>893.8684</b>  | 596.2481        | 15 | K      | 5  | 558.3246        | 279.6659         | 186.7797        |
|         | 1883.7824       | 942.3948         | 628.5990        | 16 | P      | 4  | <b>430.2296</b> | 215.6184         | 144.0814        |
|         | 1954.8195       | 977.9134         | 652.2780        | 17 | A      | 3  | 333.1768        | 167.0921         | 111.7305        |
|         | 2069.8464       | <b>1035.4268</b> | <b>690.6203</b> | 18 | D      | 2  | 262.1397        | 131.5735         | 88.0514         |
|         |                 |                  |                 | 19 | K      | 1  | 147.1128        | 74.0600          | 49.7091         |

# Annotated spectra from Saleem et. al. 2009

R.IDTQS<sub>167</sub>-EFLR<sub>166</sub>.A/2

0.907

1e+04

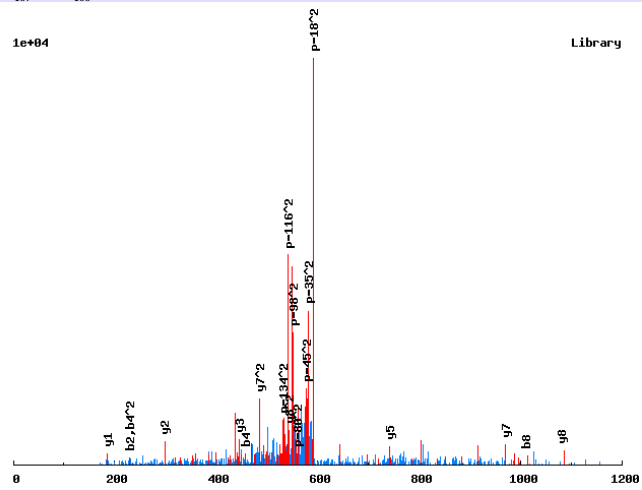

| Library | b <sup>1+</sup>  | b <sup>2+</sup> | # | AA     | # | y <sup>1+</sup>  | y <sup>2+</sup> |
|---------|------------------|-----------------|---|--------|---|------------------|-----------------|
|         | 114.0913         | 57.5493         | 1 | I      | 9 |                  |                 |
|         | <b>229.1183</b>  | 115.0628        | 2 | D      | 8 | <b>1085.4538</b> | <b>543.2306</b> |
|         | 330.1660         | 165.5866        | 3 | T      | 7 | <b>970.4269</b>  | <b>485.7171</b> |
|         | <b>458.2245</b>  | <b>229.6159</b> | 4 | Q      | 6 | 869.3792         | 435.1933        |
|         | 625.2229         | 313.1151        | 5 | S[167] | 5 | <b>741.3206</b>  | 371.1640        |
|         | 754.2655         | 377.6364        | 6 | E      | 4 | 574.3223         | 287.6648        |
|         | 901.3339         | 451.1706        | 7 | F      | 3 | <b>445.2797</b>  | 223.1435        |
|         | <b>1014.4180</b> | 507.7126        | 8 | L      | 2 | <b>298.2113</b>  | 149.6093        |
|         |                  |                 | 9 | R[166] | 1 | <b>185.1272</b>  | 93.0672         |

# Annotated spectra from Saleem et. al. 2009

R.IEC<sub>160</sub>SSNPDDPIRVTT<sub>181</sub>PMGTTTVNNNIS<sub>167</sub>PSGR.G/3

0.9879

1e+04

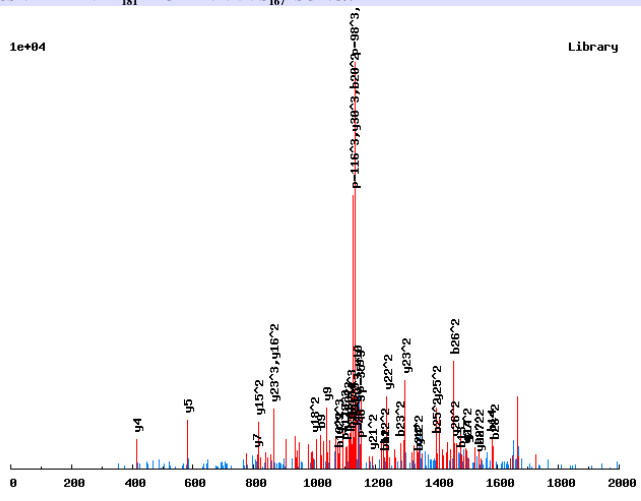

| Library | b <sup>1+</sup>  | b <sup>2+</sup>  | b <sup>3+</sup> | #  | AA     | #  | y <sup>1+</sup>  | y <sup>2+</sup>  | y <sup>3+</sup>  |
|---------|------------------|------------------|-----------------|----|--------|----|------------------|------------------|------------------|
|         | 114.0913         | 57.5493          | 38.7020         | 1  | I      | 31 |                  |                  |                  |
|         | 243.1339         | 122.0706         | 81.7162         | 2  | E      | 30 | 3377.4175        | 1689.2124        | <b>1126.4773</b> |
|         | 403.1646         | 202.0859         | 135.0597        | 3  | C[160] | 29 | 3248.3749        | 1624.6911        | <b>1083.4631</b> |
|         | 490.1966         | 245.6019         | 164.0704        | 4  | S      | 28 | 3088.3442        | <b>1544.6758</b> | 1030.1196        |
|         | 577.2286         | 289.1180         | 193.0811        | 5  | S      | 27 | 3001.3122        | <b>1501.1597</b> | 1001.1089        |
|         | 691.2716         | 346.1394         | 231.0954        | 6  | N      | 26 | 2914.2802        | <b>1457.6437</b> | 972.0982         |
|         | 788.3243         | 394.6658         | 263.4463        | 7  | P      | 25 | 2800.2372        | <b>1400.6223</b> | 934.0839         |
|         | 903.3513         | 452.1793         | 301.7886        | 8  | D      | 24 | 2703.1845        | 1352.0959        | 901.7330         |
|         | <b>1018.3782</b> | 509.6927         | 340.1309        | 9  | D      | 23 | 2588.1575        | <b>1294.5824</b> | <b>863.3907</b>  |
|         | <b>1115.4310</b> | 558.2191         | 372.4818        | 10 | P      | 22 | 2473.1306        | <b>1237.0689</b> | 825.0484         |
|         | <b>1228.5150</b> | 614.7612         | 410.1765        | 11 | I      | 21 | 2376.0778        | <b>1188.5426</b> | 792.6975         |
|         | 1384.6161        | 692.8117         | 462.2102        | 12 | R      | 20 | 2262.9938        | <b>1132.0005</b> | 755.0028         |
|         | <b>1483.6846</b> | 742.3459         | 495.2330        | 13 | V      | 19 | 2106.8927        | 1053.9500        | 702.9691         |
|         | <b>1584.7322</b> | 792.8698         | 528.9156        | 14 | T      | 18 | 2007.8243        | <b>1004.4158</b> | 669.9463         |
|         | 1765.7462        | 883.3768         | 589.2536        | 15 | T[181] | 17 | 1906.7766        | 953.8919         | 636.2637         |
|         | 1862.7990        | 931.9031         | 621.6045        | 16 | P      | 16 | 1725.7626        | <b>863.3849</b>  | 575.9257         |
|         | 1993.8395        | 997.4234         | 665.2847        | 17 | M      | 15 | 1628.7098        | <b>814.8585</b>  | 543.5748         |
|         | 2050.8610        | 1025.9341        | 684.2918        | 18 | G      | 14 | <b>1497.6693</b> | 749.3383         | 499.8946         |
|         | 2151.9086        | <b>1076.4580</b> | 717.9744        | 19 | T      | 13 | 1440.6479        | 720.8276         | 480.8875         |
|         | 2252.9563        | <b>1126.9818</b> | 751.6570        | 20 | T      | 12 | <b>1339.6002</b> | 670.3037         | 447.2049         |
|         | 2354.0040        | 1177.5056        | 785.3395        | 21 | T      | 11 | 1238.5525        | 619.7799         | 413.5224         |
|         | 2453.0724        | <b>1227.0398</b> | 818.3623        | 22 | V      | 10 | <b>1137.5048</b> | 569.2561         | 379.8398         |
|         | 2567.1153        | <b>1284.0613</b> | 856.3766        | 23 | N      | 9  | <b>1038.4364</b> | 519.7218         | 346.8170         |
|         | 2681.1583        | <b>1341.0828</b> | 894.3909        | 24 | N      | 8  | 924.3935         | 462.7004         | 308.8027         |
|         | 2795.2012        | <b>1398.1042</b> | 932.4053        | 25 | N      | 7  | <b>810.3506</b>  | 405.6789         | 270.7884         |
|         | 2908.2853        | <b>1454.6463</b> | 970.0999        | 26 | I      | 6  | 696.3076         | 348.6575         | 232.7741         |
|         | 3075.2836        | <b>1538.1454</b> | 1025.7661       | 27 | S[167] | 5  | <b>583.2236</b>  | 292.1154         | 195.0794         |
|         | 3172.3364        | <b>1586.6718</b> | 1058.1170       | 28 | P      | 4  | <b>416.2252</b>  | 208.6162         | 139.4133         |
|         | 3259.3684        | 1630.1878        | 1087.1277       | 29 | S      | 3  | 319.1724         | 160.0899         | 107.0623         |
|         | 3316.3899        | 1658.6986        | 1106.1348       | 30 | G      | 2  | 232.1404         | 116.5738         | 78.0517          |
|         |                  |                  |                 | 31 | R      | 1  | 175.1190         | 88.0631          | 59.0445          |



Annotated spectra from Saleem et. al. 2009

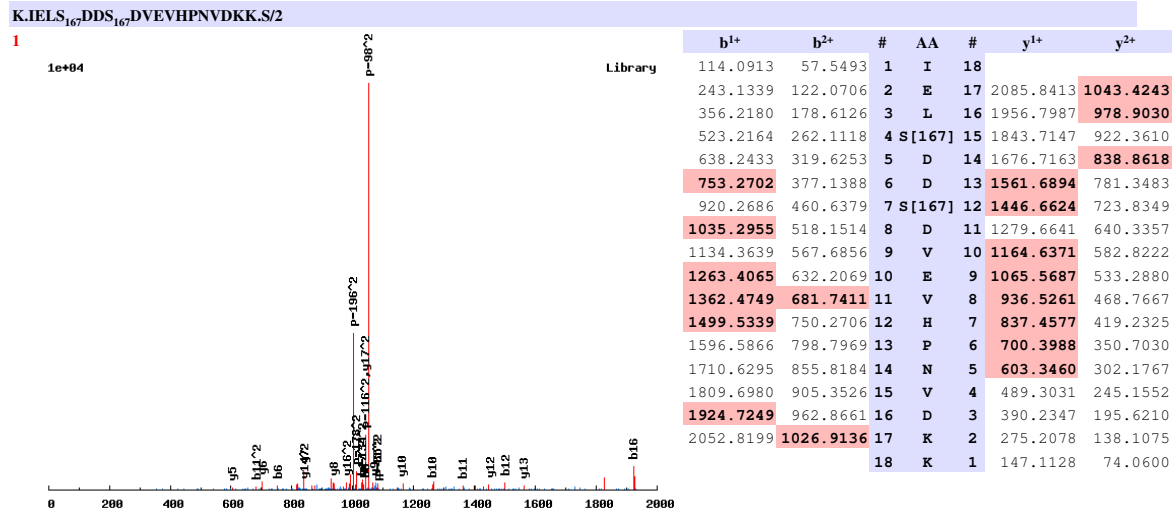

# Annotated spectra from Saleem et. al. 2009

K.IFQNPT<sub>181</sub>DEESTTS<sub>167</sub>LNEK<sub>136</sub>Q/2

0.9998

1e+04

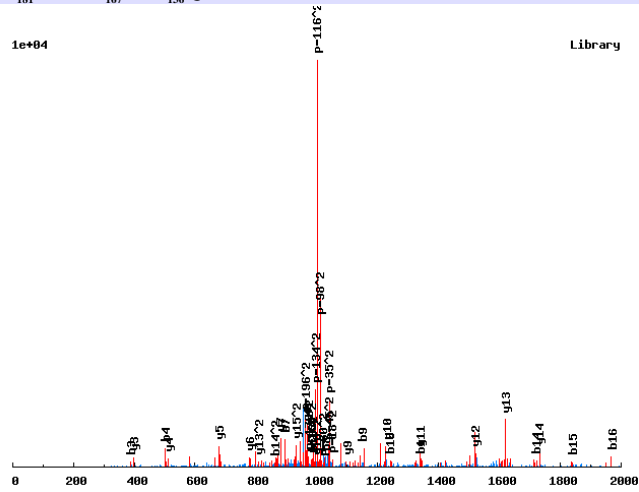

| Library | b <sup>1+</sup> | b <sup>2+</sup> | #  | AA     | #  | y <sup>1+</sup> | y <sup>2+</sup> |
|---------|-----------------|-----------------|----|--------|----|-----------------|-----------------|
|         | 114.0913        | 57.5493         | 1  | I      | 17 |                 |                 |
|         | 261.1597        | 131.0835        | 2  | F      | 16 | 2007.7711       | 1004.3892       |
|         | 389.2183        | 195.1128        | 3  | Q      | 15 | 1860.7027       | 930.8550        |
|         | 503.2613        | 252.1343        | 4  | N      | 14 | 1732.6442       | 866.8257        |
|         | 600.3140        | 300.6607        | 5  | P      | 13 | 1618.6012       | 809.8043        |
|         | 781.3280        | 391.1677        | 6  | T[181] | 12 | 1521.5485       | 761.2779        |
|         | 896.3550        | 448.6811        | 7  | D      | 11 | 1340.5344       | 670.7709        |
|         | 1025.3976       | 513.2024        | 8  | E      | 10 | 1225.5075       | 613.2574        |
|         | 1154.4402       | 577.7237        | 9  | E      | 9  | 1096.4649       | 548.7361        |
|         | 1241.4722       | 621.2397        | 10 | S      | 8  | 967.4223        | 484.2148        |
|         | 1342.5199       | 671.7636        | 11 | T      | 7  | 880.3903        | 440.6988        |
|         | 1443.5675       | 722.2874        | 12 | T      | 6  | 779.3426        | 390.1750        |
|         | 1610.5659       | 805.7866        | 13 | S[167] | 5  | 678.2949        | 339.6511        |
|         | 1723.6500       | 862.3286        | 14 | L      | 4  | 511.2966        | 256.1519        |
|         | 1837.6929       | 919.3501        | 15 | N      | 3  | 398.2125        | 199.6099        |
|         | 1966.7355       | 983.8714        | 16 | E      | 2  | 284.1696        | 142.5884        |
|         |                 |                 | 17 | K[136] | 1  | 155.1270        | 78.0671         |

# Annotated spectra from Saleem et. al. 2009

K.IFQNPT<sub>181</sub>DEES<sub>167</sub>TTS<sub>167</sub>LNEK<sub>136</sub>QEGK<sub>136</sub>D/3

0.9843

1e+04

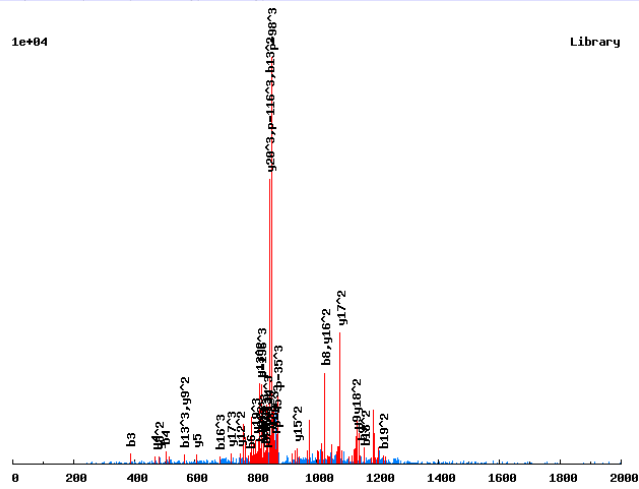

| Library | b <sup>1+</sup> | b <sup>2+</sup> | b <sup>3+</sup> | #  | AA     | #  | y <sup>1+</sup> | y <sup>2+</sup> | y <sup>3+</sup> |
|---------|-----------------|-----------------|-----------------|----|--------|----|-----------------|-----------------|-----------------|
|         | 114.0913        | 57.5493         | 38.7020         | 1  | I      | 21 |                 |                 |                 |
|         | 261.1597        | 131.0835        | 87.7248         | 2  | F      | 20 | 2537.9693       | 1269.4883       | 846.6613        |
|         | 389.2183        | 195.1128        | 130.4110        | 3  | Q      | 19 | 2390.9009       | 1195.9541       | 797.6385        |
|         | 503.2613        | 252.1343        | 168.4253        | 4  | N      | 18 | 2262.8423       | 1131.9248       | 754.9523        |
|         | 600.3140        | 300.6607        | 200.7762        | 5  | P      | 17 | 2148.7993       | 1074.9033       | 716.9380        |
|         | 781.3280        | 391.1677        | 261.1142        | 6  | T[181] | 16 | 2051.7466       | 1026.3769       | 684.5870        |
|         | 896.3550        | 448.6811        | 299.4565        | 7  | D      | 15 | 1870.7326       | 935.8699        | 624.2490        |
|         | 1025.3976       | 513.2024        | 342.4707        | 8  | E      | 14 | 1755.7056       | 878.3565        | 585.9067        |
|         | 1154.4402       | 577.7237        | 385.4849        | 9  | E      | 13 | 1626.6630       | 813.8352        | 542.8925        |
|         | 1321.4385       | 661.2229        | 441.1510        | 10 | S[167] | 12 | 1497.6204       | 749.3139        | 499.8783        |
|         | 1422.4862       | 711.7467        | 474.8336        | 11 | T      | 11 | 1330.6221       | 665.8147        | 444.2122        |
|         | 1523.5339       | 762.2706        | 508.5161        | 12 | T      | 10 | 1229.5744       | 615.2908        | 410.5297        |
|         | 1690.5322       | 845.7698        | 564.1823        | 13 | S[167] | 9  | 1128.5267       | 564.7670        | 376.8471        |
|         | 1803.6163       | 902.3118        | 601.8770        | 14 | L      | 8  | 961.5284        | 481.2678        | 321.1810        |
|         | 1917.6592       | 959.3333        | 639.8913        | 15 | N      | 7  | 848.4443        | 424.7258        | 283.4863        |
|         | 2046.7018       | 1023.8545       | 682.9055        | 16 | E      | 6  | 734.4014        | 367.7043        | 245.4720        |
|         | 2182.8110       | 1091.9091       | 728.2752        | 17 | K[136] | 5  | 605.3588        | 303.1830        | 202.4578        |
|         | 2310.8696       | 1155.9384       | 770.9614        | 18 | Q      | 4  | 469.2496        | 235.1285        | 157.0881        |
|         | 2439.9121       | 1220.4597       | 813.9756        | 19 | E      | 3  | 341.1910        | 171.0992        | 114.4019        |
|         | 2496.9336       | 1248.9704       | 832.9827        | 20 | G      | 2  | 212.1485        | 106.5779        | 71.3877         |
|         |                 |                 |                 | 21 | K[136] | 1  | 155.1270        | 78.0671         | 52.3805         |

# Annotated spectra from Saleem et. al. 2009

K.IGDEQAGVVVDEETPPLEQQDS<sub>167</sub>HES<sub>167</sub>LAADSR.N/3

0.9932

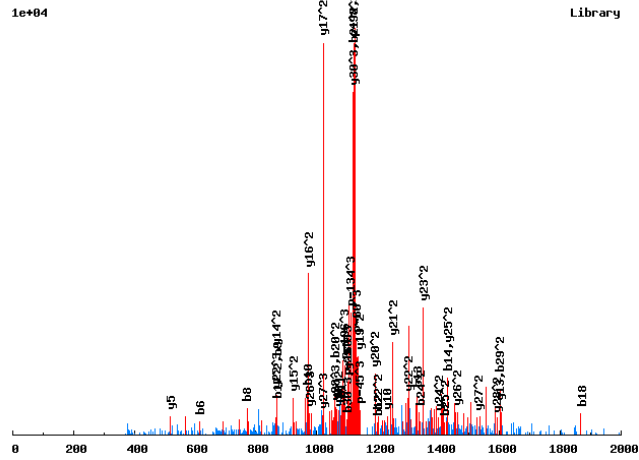

| Library | b <sup>1+</sup> | b <sup>2+</sup> | b <sup>3+</sup> | #  | AA     | #  | y <sup>1+</sup> | y <sup>2+</sup> | y <sup>3+</sup> |
|---------|-----------------|-----------------|-----------------|----|--------|----|-----------------|-----------------|-----------------|
|         | 114.0913        | 57.5493         | 38.7020         | 1  | I      | 31 |                 |                 |                 |
|         | 171.1128        | 86.0600         | 57.7091         | 2  | G      | 30 | 3354.3682       | 1677.6877       | 1118.7943       |
|         | 286.1397        | 143.5735        | 96.0514         | 3  | D      | 29 | 3297.3468       | 1649.1770       | 1099.7871       |
|         | 415.1823        | 208.0948        | 139.0656        | 4  | E      | 28 | 3182.3198       | 1591.6635       | 1061.4448       |
|         | 543.2409        | 272.1241        | 181.7518        | 5  | Q      | 27 | 3053.2772       | 1527.1423       | 1018.4306       |
|         | 614.2780        | 307.6427        | 205.4309        | 6  | A      | 26 | 2925.2186       | 1463.1130       | 975.7444        |
|         | 671.2995        | 336.1534        | 224.4380        | 7  | G      | 25 | 2854.1815       | 1427.5944       | 952.0654        |
|         | 770.3679        | 385.6876        | 257.4608        | 8  | V      | 24 | 2797.1601       | 1399.0837       | 933.0582        |
|         | 869.4363        | 435.2218        | 290.4836        | 9  | V      | 23 | 2698.0917       | 1349.5495       | 900.0354        |
|         | 968.5047        | 484.7560        | 323.5064        | 10 | V      | 22 | 2599.0233       | 1300.0153       | 867.0126        |
|         | 1083.5316       | 542.2695        | 361.8487        | 11 | D      | 21 | 2499.9548       | 1250.4811       | 833.9898        |
|         | 1198.5586       | 599.7829        | 400.1910        | 12 | D      | 20 | 2384.9279       | 1192.9676       | 795.6475        |
|         | 1327.6012       | 664.3042        | 443.2052        | 13 | E      | 19 | 2269.9010       | 1135.4541       | 757.3052        |
|         | 1428.6489       | 714.8281        | 476.8878        | 14 | T      | 18 | 2140.8584       | 1070.9328       | 714.2910        |
|         | 1525.7016       | 763.3544        | 509.2387        | 15 | P      | 17 | 2039.8107       | 1020.4090       | 680.6084        |
|         | 1622.7544       | 811.8808        | 541.5896        | 16 | P      | 16 | 1942.7579       | 971.8826        | 648.2575        |
|         | 1735.8384       | 868.4229        | 579.2843        | 17 | L      | 15 | 1845.7052       | 923.3562        | 615.9066        |
|         | 1864.8810       | 932.9442        | 622.2985        | 18 | E      | 14 | 1732.6211       | 866.8142        | 578.2119        |
|         | 1992.9396       | 996.9734        | 664.9847        | 19 | Q      | 13 | 1603.5785       | 802.2929        | 535.1977        |
|         | 2120.9982       | 1061.0027       | 707.6709        | 20 | Q      | 12 | 1475.5199       | 738.2636        | 492.5115        |
|         | 2236.0251       | 1118.5162       | 746.0132        | 21 | D      | 11 | 1347.4614       | 674.2343        | 449.8253        |
|         | 2403.0235       | 1202.0154       | 801.6794        | 22 | S[167] | 10 | 1232.4344       | 616.7209        | 411.4830        |
|         | 2540.0824       | 1270.5448       | 847.3657        | 23 | H      | 9  | 1065.4361       | 533.2217        | 355.8169        |
|         | 2669.1250       | 1335.0661       | 890.3799        | 24 | E      | 8  | 928.3772        | 464.6922        | 310.1306        |
|         | 2836.1234       | 1418.5653       | 946.0460        | 25 | S[167] | 7  | 799.3346        | 400.1709        | 267.1164        |
|         | 2949.2074       | 1475.1073       | 983.7407        | 26 | L      | 6  | 632.3362        | 316.6717        | 211.4503        |
|         | 3020.2445       | 1510.6259       | 1007.4197       | 27 | A      | 5  | 519.2521        | 260.1297        | 173.7556        |
|         | 3091.2816       | 1546.1445       | 1031.0987       | 28 | A      | 4  | 448.2150        | 224.6112        | 150.0765        |
|         | 3206.3086       | 1603.6579       | 1069.4410       | 29 | D      | 3  | 377.1779        | 189.0926        | 126.3975        |
|         | 3293.3406       | 1647.1739       | 1098.4517       | 30 | S      | 2  | 262.1510        | 131.5791        | 88.0552         |
|         |                 |                 |                 | 31 | R      | 1  | 175.1190        | 88.0631         | 59.0445         |

# Annotated spectra from Saleem et. al. 2009

R.IGDS<sub>167</sub>-LQGS<sub>167</sub>-PQR<sub>166</sub>-1/2

0.9999

1e+04

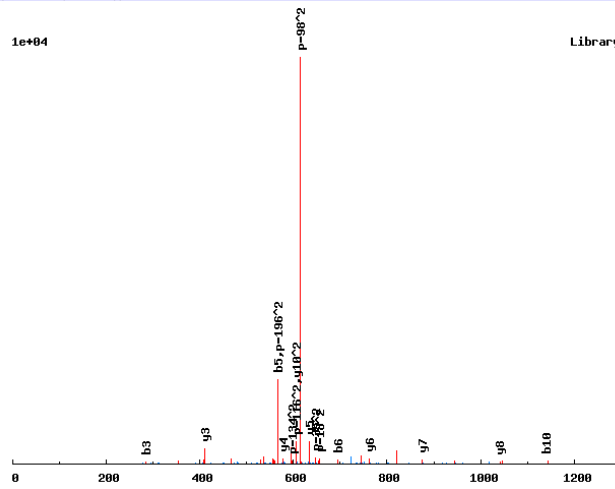

| Library | b <sup>1+</sup> | b <sup>2+</sup> | #  | AA     | #  | y <sup>1+</sup> | y <sup>2+</sup> |
|---------|-----------------|-----------------|----|--------|----|-----------------|-----------------|
|         | 114.0913        | 57.5493         | 1  | I      | 11 |                 |                 |
|         | 171.1128        | 86.0600         | 2  | G      | 10 | 1214.4478       | 607.7275        |
|         | 286.1397        | 143.5735        | 3  | D      | 9  | 1157.4263       | 579.2168        |
|         | 453.1381        | 227.0727        | 4  | S[167] | 8  | 1042.3994       | 521.7033        |
|         | 566.2222        | 283.6147        | 5  | L      | 7  | 875.4010        | 438.2042        |
|         | 694.2807        | 347.6440        | 6  | Q      | 6  | 762.3170        | 381.6621        |
|         | 751.3022        | 376.1547        | 7  | G      | 5  | 634.2584        | 317.6328        |
|         | 918.3006        | 459.6539        | 8  | S[167] | 4  | 577.2369        | 289.1221        |
|         | 1015.3533       | 508.1803        | 9  | P      | 3  | 410.2386        | 205.6229        |
|         | 1143.4119       | 572.2096        | 10 | Q      | 2  | 313.1858        | 157.0965        |
|         |                 |                 | 11 | R[166] | 1  | 185.1272        | 93.0672         |

## Annotated spectra from Saleem et. al. 2009

R.IGGTHSGLT<sub>181</sub>PQS<sub>167</sub>SISSDKA/3

0.9996

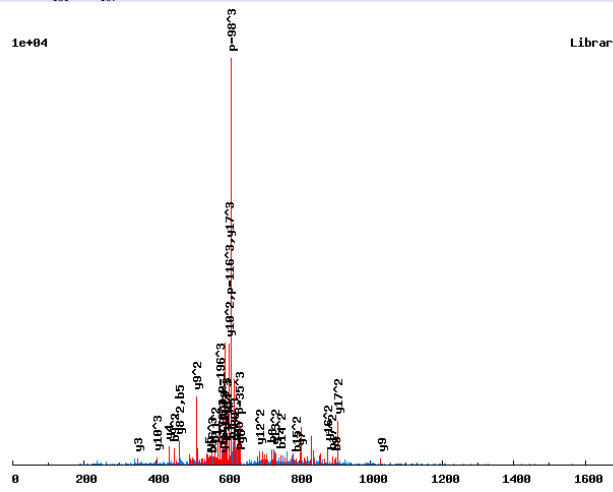

| Library | b <sup>1+</sup> | b <sup>2+</sup> | b <sup>3+</sup> | #  | AA     | #  | y <sup>1+</sup> | y <sup>2+</sup> | y <sup>3+</sup> |
|---------|-----------------|-----------------|-----------------|----|--------|----|-----------------|-----------------|-----------------|
|         | 114.0913        | 57.5493         | 38.7020         | 1  | I      | 18 |                 |                 |                 |
|         | 171.1128        | 86.0600         | 57.7091         | 2  | G      | 17 | 1818.7307       | 909.8690        | 606.9151        |
|         | 228.1343        | 114.5708        | 76.7163         | 3  | G      | 16 | 1761.7092       | 881.3582        | 587.9079        |
|         | 329.1819        | 165.0946        | 110.3988        | 4  | T      | 15 | 1704.6877       | 852.8475        | 568.9008        |
|         | 466.2408        | 233.6241        | 156.0851        | 5  | H      | 14 | 1603.6401       | 802.3237        | 535.2182        |
|         | 553.2729        | 277.1401        | 185.0958        | 6  | S      | 13 | 1466.5812       | 733.7942        | 489.5319        |
|         | 610.2943        | 305.6508        | 204.1030        | 7  | G      | 12 | 1379.5491       | 690.2782        | 460.5212        |
|         | 723.3784        | 362.1928        | 241.7977        | 8  | L      | 11 | 1322.5277       | 661.7675        | 441.5141        |
|         | 904.3924        | 452.6998        | 302.1357        | 9  | T[181] | 10 | 1209.4436       | 605.2254        | 403.8194        |
|         | 1001.4452       | 501.2262        | 334.4866        | 10 | P      | 9  | 1028.4296       | 514.7184        | 343.4814        |
|         | 1129.5038       | 565.2555        | 377.1728        | 11 | Q      | 8  | 931.3768        | 466.1921        | 311.1305        |
|         | 1296.5021       | 648.7547        | 432.8389        | 12 | S[167] | 7  | 803.3183        | 402.1628        | 268.4443        |
|         | 1383.5341       | 692.2707        | 461.8496        | 13 | S      | 6  | 636.3199        | 318.6636        | 212.7782        |
|         | 1496.6182       | 748.8127        | 499.5443        | 14 | I      | 5  | 549.2879        | 275.1476        | 183.7675        |
|         | 1583.6502       | 792.3288        | 528.5549        | 15 | S      | 4  | 436.2038        | 218.6055        | 146.0728        |
|         | 1670.6823       | 835.8448        | 557.5656        | 16 | S      | 3  | 349.1718        | 175.0895        | 117.0621        |
|         | 1785.7092       | 893.3582        | 595.9079        | 17 | D      | 2  | 262.1397        | 131.5735        | 88.0514         |
|         |                 |                 |                 | 18 | K      | 1  | 147.1128        | 74.0600         | 49.7091         |

# Annotated spectra from Saleem et. al. 2009

R.IGGTHSGLT<sub>181</sub>PQSS<sub>167</sub>IS<sub>167</sub>SDK<sub>136</sub>AR<sub>166</sub>H/2

0.9352

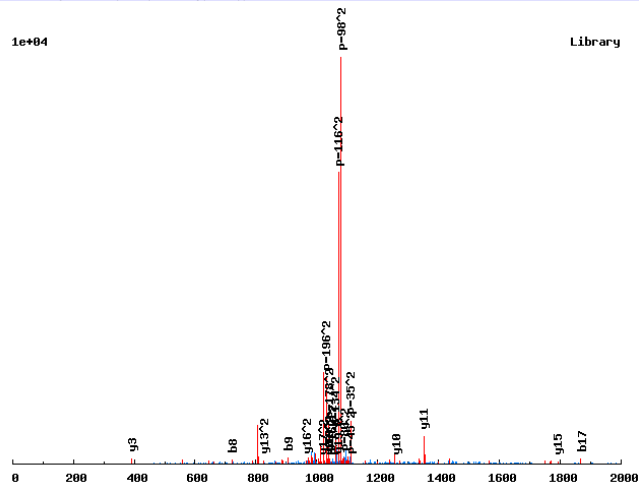

| Library | b <sup>1+</sup> | b <sup>2+</sup> | #  | AA     | #  | y <sup>1+</sup> | y <sup>2+</sup> |
|---------|-----------------|-----------------|----|--------|----|-----------------|-----------------|
|         | 114.0913        | 57.5493         | 1  | I      | 20 |                 |                 |
|         | 171.1128        | 86.0600         | 2  | G      | 19 | 2143.8577       | 1072.4325       |
|         | 228.1343        | 114.5708        | 3  | G      | 18 | 2086.8362       | 1043.9218       |
|         | 329.1819        | 165.0946        | 4  | T      | 17 | 2029.8148       | 1015.4110       |
|         | 466.2408        | 233.6241        | 5  | H      | 16 | 1928.7671       | 964.8872        |
|         | 553.2729        | 277.1401        | 6  | S      | 15 | 1791.7082       | 896.3577        |
|         | 610.2943        | 305.6508        | 7  | G      | 14 | 1704.6761       | 852.8417        |
|         | 723.3784        | 362.1928        | 8  | L      | 13 | 1647.6547       | 824.3310        |
|         | 904.3924        | 452.6998        | 9  | T[181] | 12 | 1534.5706       | 767.7890        |
|         | 1001.4452       | 501.2262        | 10 | P      | 11 | 1353.5566       | 677.2819        |
|         | 1129.5038       | 565.2555        | 11 | Q      | 10 | 1256.5038       | 628.7556        |
|         | 1216.5358       | 608.7715        | 12 | S      | 9  | 1128.4453       | 564.7263        |
|         | 1383.5341       | 692.2707        | 13 | S[167] | 8  | 1041.4132       | 521.2103        |
|         | 1496.6182       | 748.8127        | 14 | I      | 7  | 874.4149        | 437.7111        |
|         | 1663.6166       | 832.3119        | 15 | S[167] | 6  | 761.3308        | 381.1690        |
|         | 1750.6486       | 875.8279        | 16 | S      | 5  | 594.3325        | 297.6699        |
|         | 1865.6755       | 933.3414        | 17 | D      | 4  | 507.3004        | 254.1539        |
|         | 2001.7847       | 1001.3960       | 18 | K[136] | 3  | 392.2735        | 196.6404        |
|         | 2072.8218       | 1036.9145       | 19 | A      | 2  | 256.1643        | 128.5858        |
|         |                 |                 | 20 | R[166] | 1  | 185.1272        | 93.0672         |

# Annotated spectra from Saleem et. al. 2009

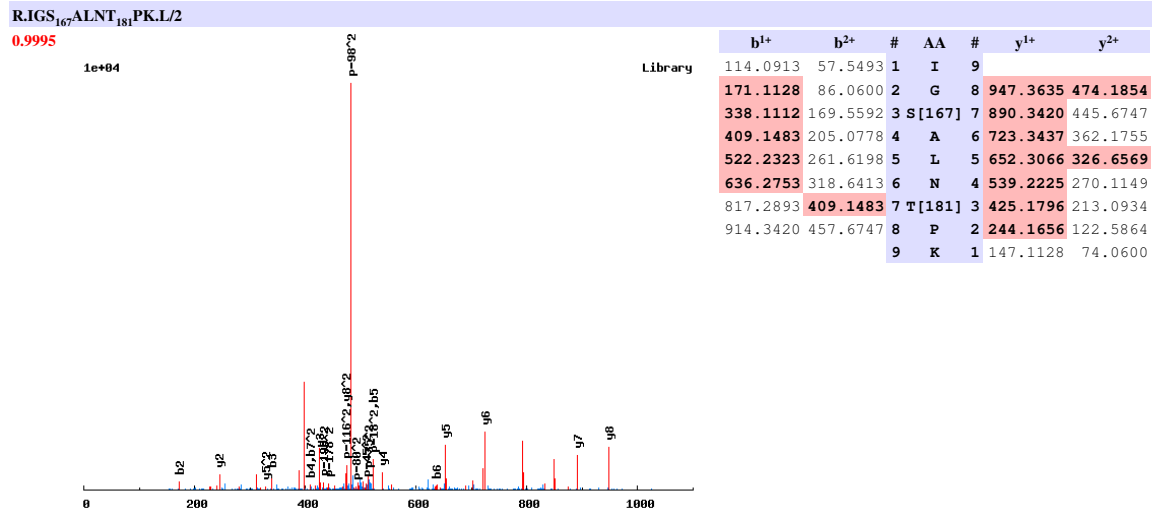



# Annotated spectra from Saleem et. al. 2009

R.IGS<sub>167</sub>SADVIRA/2

0.589

1e+04

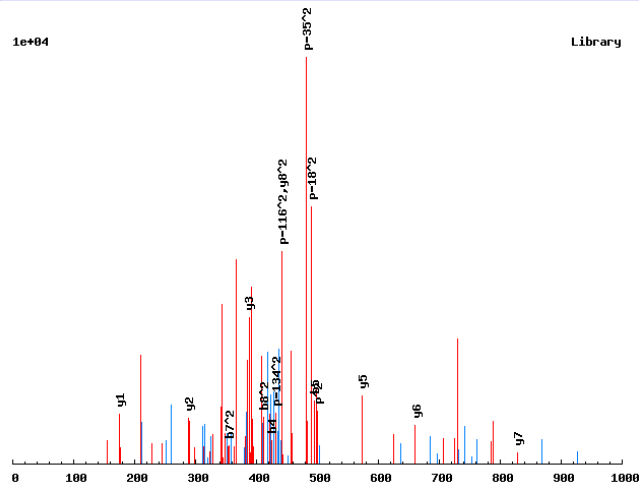

| Library | b <sup>1+</sup> | b <sup>2+</sup> | # | AA      | # | y <sup>1+</sup> | y <sup>2+</sup> |
|---------|-----------------|-----------------|---|---------|---|-----------------|-----------------|
|         | 114.0913        | 57.5493         | 1 | I       | 9 |                 |                 |
|         | 171.1128        | 86.0600         | 2 | G       | 8 | 884.3873        | 442.6973        |
|         | 338.1112        | 169.5592        | 3 | S [167] | 7 | 827.3659        | 414.1866        |
|         | 425.1432        | 213.0752        | 4 | S       | 6 | 660.3675        | 330.6874        |
|         | 496.1803        | 248.5938        | 5 | A       | 5 | 573.3355        | 287.1714        |
|         | 611.2072        | 306.1073        | 6 | D       | 4 | 502.2984        | 251.6528        |
|         | 710.2757        | 355.6415        | 7 | V       | 3 | 387.2714        | 194.1393        |
|         | 823.3597        | 412.1835        | 8 | I       | 2 | 288.2030        | 144.6051        |
|         |                 |                 | 9 | R       | 1 | 175.1190        | 88.0631         |

# Annotated spectra from Saleem et. al. 2009

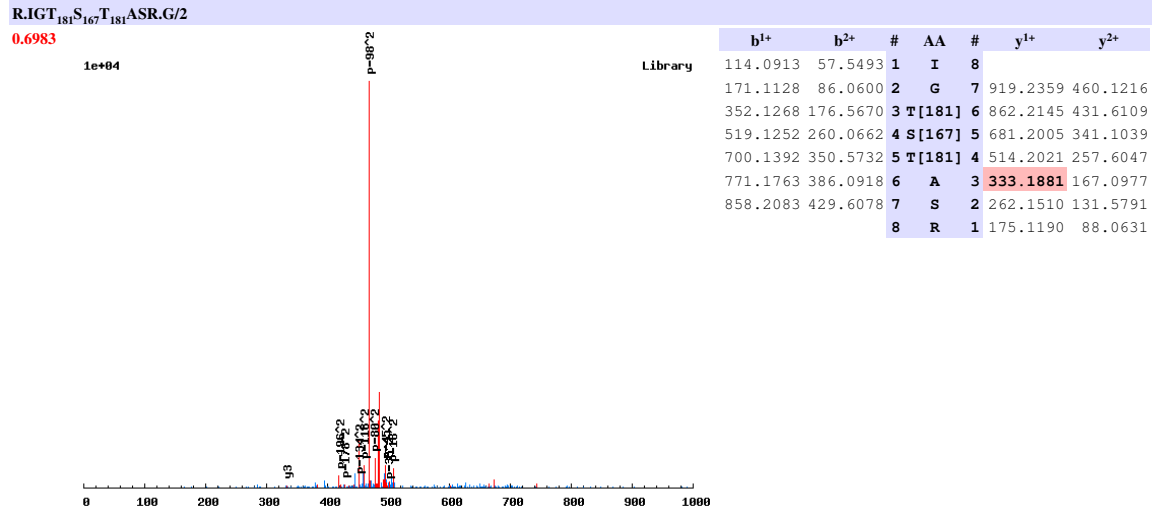

# Annotated spectra from Saleem et. al. 2009

R.IHS<sub>167</sub>HDDIINLGK<sub>136</sub>A/3

0.999

1e+04

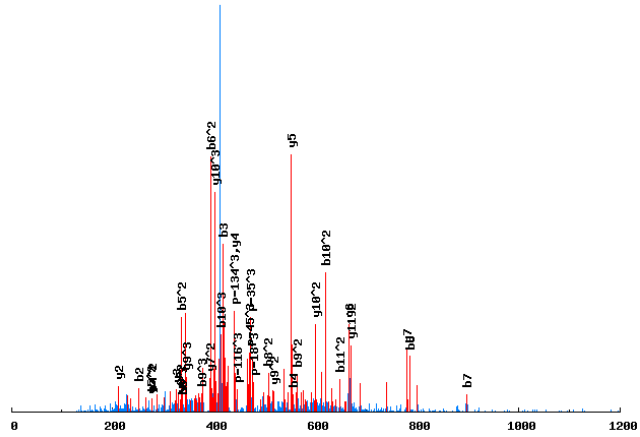

| Library | b <sup>1+</sup> | b <sup>2+</sup> | b <sup>3+</sup> | #  | AA     | #  | y <sup>1+</sup> | y <sup>2+</sup> | y <sup>3+</sup> |
|---------|-----------------|-----------------|-----------------|----|--------|----|-----------------|-----------------|-----------------|
|         | 114.0913        | 57.5493         | 38.7020         | 1  | I      | 12 |                 |                 |                 |
|         | 251.1502        | 126.0788        | 84.3883         | 2  | H      | 11 | 1336.6136       | 668.8105        | 446.2094        |
|         | 418.1486        | 209.5779        | 140.0544        | 3  | S[167] | 10 | 1199.5547       | 600.2810        | 400.5231        |
|         | 555.2075        | 278.1074        | 185.7407        | 4  | H      | 9  | 1032.5564       | 516.7818        | 344.8570        |
|         | 670.2345        | 335.6209        | 224.0830        | 5  | D      | 8  | 895.4974        | 448.2524        | 299.1707        |
|         | 785.2614        | 393.1343        | 262.4253        | 6  | D      | 7  | 780.4705        | 390.7389        | 260.8284        |
|         | 898.3455        | 449.6764        | 300.1200        | 7  | I      | 6  | 665.4436        | 333.2254        | 222.4860        |
|         | 1011.4295       | 506.2184        | 337.8147        | 8  | I      | 5  | 552.3595        | 276.6834        | 184.7914        |
|         | 1125.4725       | 563.2399        | 375.8290        | 9  | N      | 4  | 439.2754        | 220.1414        | 147.0967        |
|         | 1238.5565       | 619.7819        | 413.5237        | 10 | L      | 3  | 325.2325        | 163.1199        | 109.0824        |
|         | 1295.5780       | 648.2926        | 432.5308        | 11 | G      | 2  | 212.1485        | 106.5779        | 71.3877         |
|         |                 |                 |                 | 12 | K[136] | 1  | 155.1270        | 78.0671         | 52.3805         |

# Annotated spectra from Saleem et. al. 2009

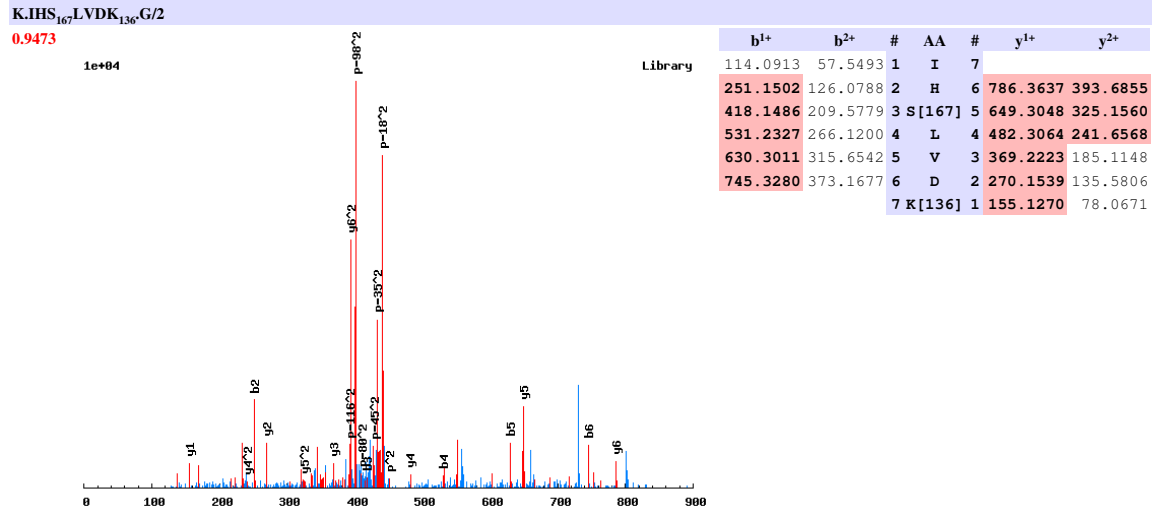

# Annotated spectra from Saleem et. al. 2009

R.IIEHS<sub>167</sub>DVENENVKDNELQEIDNVS<sub>167</sub>LDEPK.I/3

0.9994

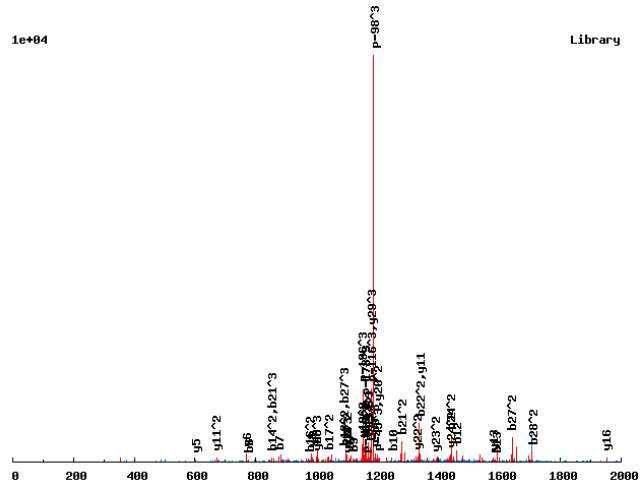

| Library | b <sup>1+</sup>  | b <sup>2+</sup>  | b <sup>3+</sup>  | #  | AA      | #  | y <sup>1+</sup>  | y <sup>2+</sup>  | y <sup>3+</sup>  |
|---------|------------------|------------------|------------------|----|---------|----|------------------|------------------|------------------|
|         | 114.0913         | 57.5493          | 38.7020          | 1  | I       | 30 |                  |                  |                  |
|         | 227.1754         | 114.0913         | 76.3967          | 2  | I       | 29 | 3540.4938        | 1770.7505        | <b>1180.8361</b> |
|         | 356.2180         | 178.6126         | 119.4108         | 3  | E       | 28 | 3427.4098        | 1714.2085        | 1143.1414        |
|         | 493.2769         | 247.1421         | 165.0972         | 4  | H       | 27 | 3298.3672        | 1649.6872        | <b>1100.1272</b> |
|         | 660.2753         | 330.6413         | 220.7633         | 5  | S [167] | 26 | 3161.3083        | 1581.1578        | 1054.4409        |
|         | <b>775.3022</b>  | 388.1547         | 259.1056         | 6  | D       | 25 | 2994.3099        | 1497.6586        | <b>998.7748</b>  |
|         | <b>874.3706</b>  | 437.6889         | 292.1284         | 7  | V       | 24 | 2879.2830        | <b>1440.1451</b> | 960.4325         |
|         | <b>1003.4132</b> | 502.2102         | 335.1426         | 8  | E       | 23 | 2780.2145        | <b>1390.6109</b> | 927.4097         |
|         | <b>1117.4561</b> | 559.2317         | 373.1569         | 9  | N       | 22 | 2651.1720        | <b>1326.0896</b> | 884.3955         |
|         | <b>1246.4987</b> | 623.7530         | 416.1711         | 10 | E       | 21 | 2537.1290        | 1269.0682        | 846.3812         |
|         | 1360.5417        | 680.7745         | 454.1854         | 11 | N       | 20 | 2408.0864        | <b>1204.5469</b> | 803.3670         |
|         | <b>1459.6101</b> | 730.3087         | 487.2082         | 12 | V       | 19 | 2294.0435        | <b>1147.5254</b> | 765.3527         |
|         | <b>1587.7050</b> | 794.3562         | 529.9065         | 13 | K       | 18 | 2194.9751        | <b>1097.9912</b> | 732.3299         |
|         | 1702.7320        | <b>851.8696</b>  | 568.2488         | 14 | D       | 17 | 2066.8801        | 1033.9437        | 689.6316         |
|         | 1816.7749        | 908.8911         | 606.2632         | 15 | N       | 16 | <b>1951.8532</b> | 976.4302         | 651.2893         |
|         | 1945.8175        | <b>973.4124</b>  | 649.2773         | 16 | E       | 15 | 1837.8103        | 919.4088         | 613.2749         |
|         | 2074.8601        | <b>1037.9337</b> | 692.2915         | 17 | E       | 14 | 1708.7677        | 854.8875         | 570.2607         |
|         | 2187.9441        | <b>1094.4757</b> | 729.9862         | 18 | L       | 13 | <b>1579.7251</b> | 790.3662         | 527.2465         |
|         | 2316.0027        | <b>1158.5050</b> | 772.6724         | 19 | Q       | 12 | 1466.6410        | 733.8242         | 489.5519         |
|         | 2445.0453        | 1223.0263        | 815.6866         | 20 | E       | 11 | <b>1338.5824</b> | <b>669.7949</b>  | 446.8657         |
|         | 2558.1294        | <b>1279.5683</b> | <b>853.3813</b>  | 21 | I       | 10 | 1209.5399        | 605.2736         | 403.8515         |
|         | 2673.1563        | <b>1337.0818</b> | 891.7236         | 22 | D       | 9  | <b>1096.4558</b> | 548.7315         | 366.1568         |
|         | 2787.1992        | 1394.1033        | 929.7379         | 23 | N       | 8  | <b>981.4289</b>  | 491.2181         | 327.8145         |
|         | 2886.2676        | <b>1443.6375</b> | 962.7607         | 24 | V       | 7  | 867.3859         | 434.1966         | 289.8002         |
|         | 3053.2660        | 1527.1366        | 1018.4269        | 25 | S [167] | 6  | <b>768.3175</b>  | 384.6624         | 256.7774         |
|         | 3166.3501        | 1583.6787        | 1056.1215        | 26 | L       | 5  | <b>601.3192</b>  | 301.1632         | 201.1112         |
|         | 3281.3770        | <b>1641.1921</b> | <b>1094.4639</b> | 27 | D       | 4  | 488.2351         | 244.6212         | 163.4166         |
|         | 3410.4196        | <b>1705.7134</b> | 1137.4781        | 28 | E       | 3  | 373.2081         | 187.1077         | 125.0742         |
|         | 3507.4724        | 1754.2398        | <b>1169.8290</b> | 29 | P       | 2  | 244.1656         | 122.5864         | 82.0600          |
|         |                  |                  |                  | 30 | K       | 1  | 147.1128         | 74.0600          | 49.7091          |

Annotated spectra from Saleem et. al. 2009

R.HIT<sub>181</sub>SDATVS<sub>167</sub>K<sub>136</sub>K<sub>136</sub>D/2

0.9738

1e+04

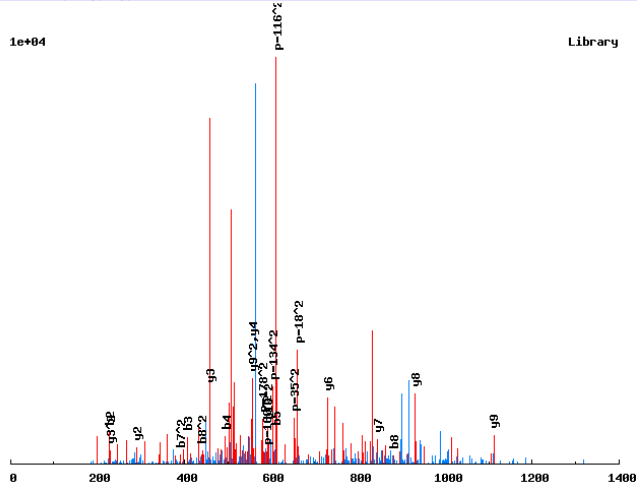

| Library | b <sup>1+</sup> | b <sup>2+</sup> | #  | AA     | #  | y <sup>1+</sup> | y <sup>2+</sup> |
|---------|-----------------|-----------------|----|--------|----|-----------------|-----------------|
|         | 114.0913        | 57.5493         | 1  | I      | 11 |                 |                 |
|         | 227.1754        | 114.0913        | 2  | I      | 10 | 1225.5448       | 613.2760        |
|         | 408.1894        | 204.5983        | 3  | T[181] | 9  | 1112.4607       | 556.7340        |
|         | 495.2214        | 248.1144        | 4  | S      | 8  | 931.4467        | 466.2270        |
|         | 610.2484        | 305.6278        | 5  | D      | 7  | 844.4147        | 422.7110        |
|         | 681.2855        | 341.1464        | 6  | A      | 6  | 729.3877        | 365.1975        |
|         | 782.3332        | 391.6702        | 7  | T      | 5  | 658.3506        | 329.6789        |
|         | 881.4016        | 441.2044        | 8  | V      | 4  | 557.3029        | 279.1551        |
|         | 1048.3999       | 524.7036        | 9  | S[167] | 3  | 458.2345        | 229.6209        |
|         | 1184.5091       | 592.7582        | 10 | K[136] | 2  | 291.2362        | 146.1217        |
|         |                 |                 | 11 | K[136] | 1  | 155.1270        | 78.0671         |

# Annotated spectra from Saleem et. al. 2009

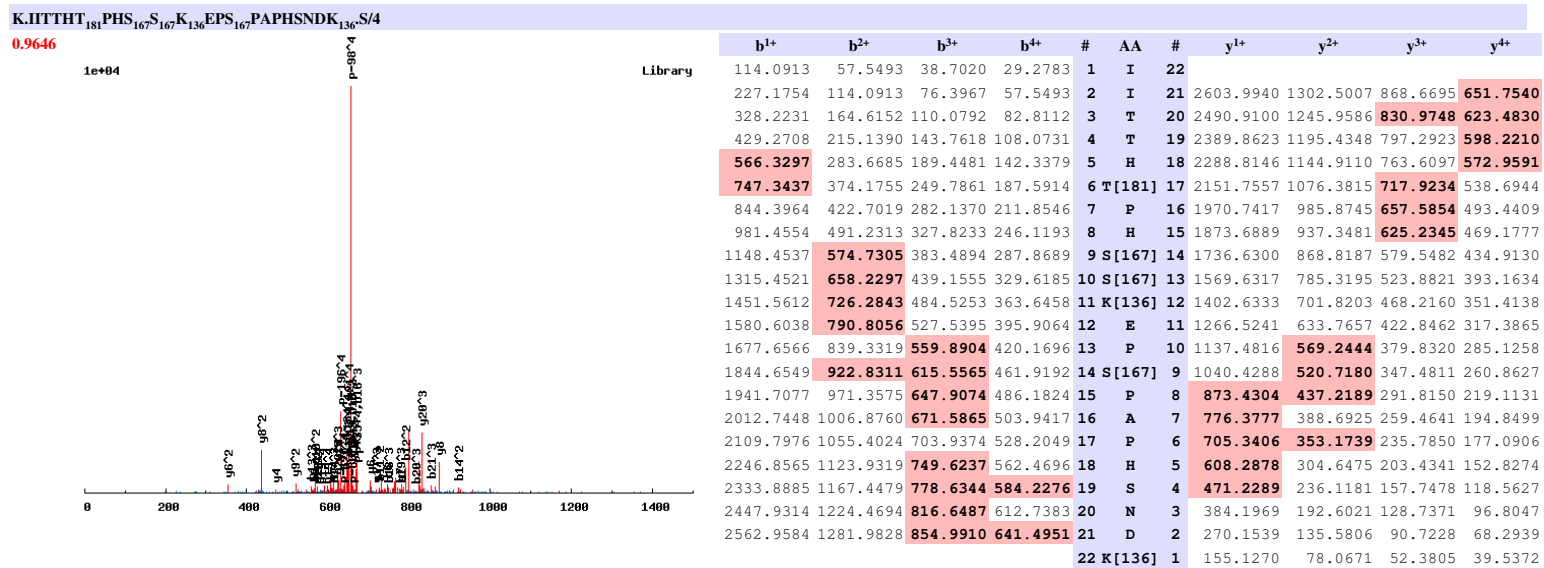

Annotated spectra from Saleem et. al. 2009

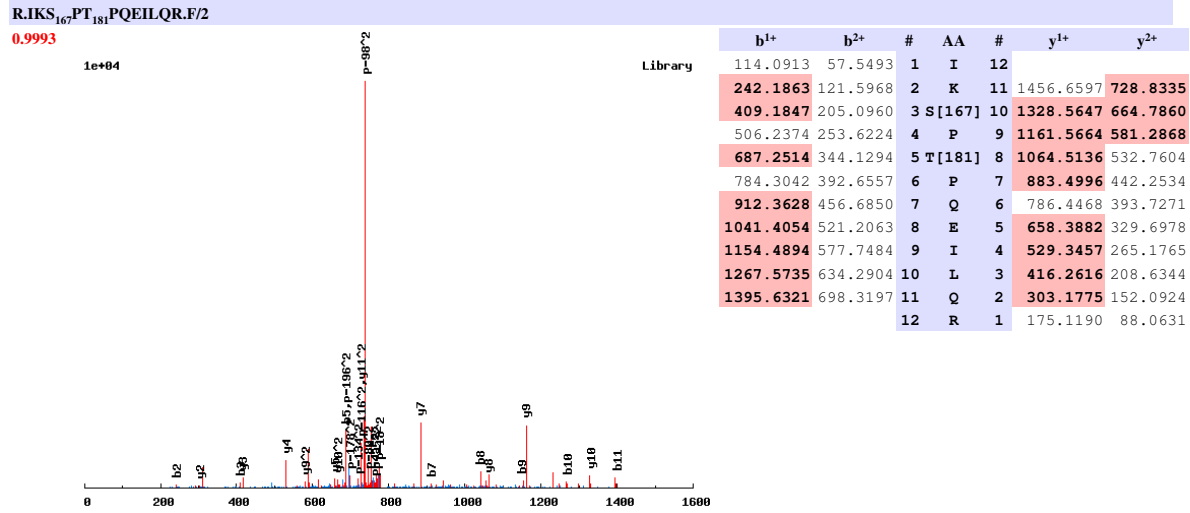



# Annotated spectra from Saleem et. al. 2009

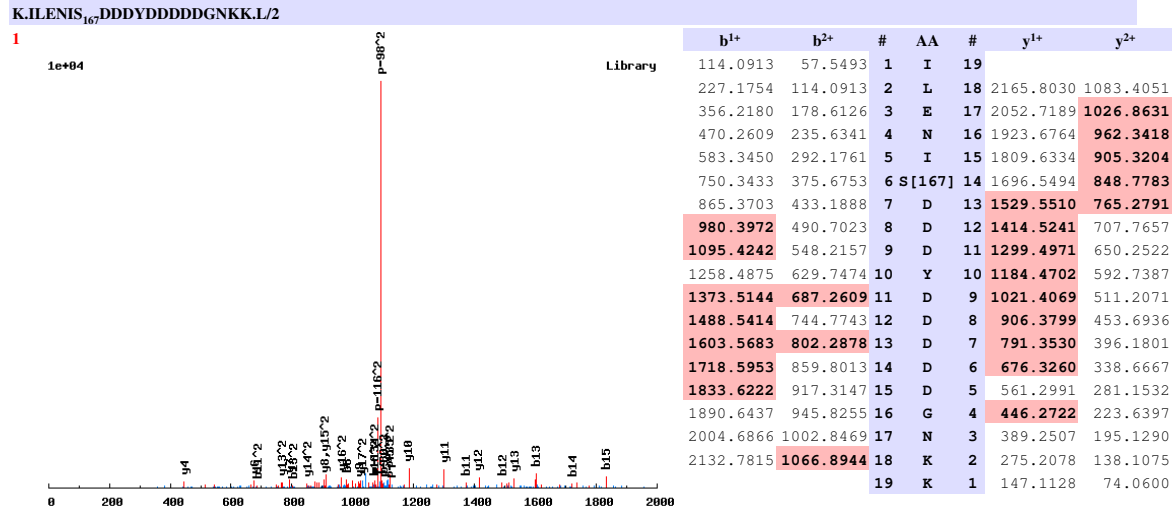

# Annotated spectra from Saleem et. al. 2009

R.ILSAS<sub>167</sub>S<sub>167</sub>IHENFPSR.T/2

0.9944

1e+04

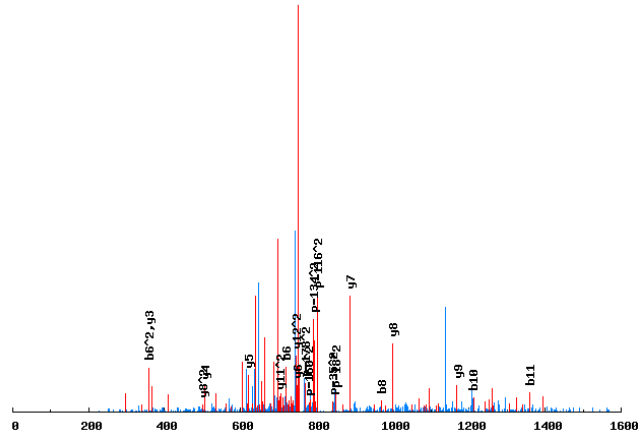

| Library | b <sup>1+</sup>  | b <sup>2+</sup> | #  | AA     | #  | y <sup>1+</sup>  | y <sup>2+</sup> |
|---------|------------------|-----------------|----|--------|----|------------------|-----------------|
|         | 114.0913         | 57.5493         | 1  | I      | 14 |                  |                 |
|         | 227.1754         | 114.0913        | 2  | L      | 13 | 1604.6506        | 802.8289        |
|         | 314.2074         | 157.6074        | 3  | S      | 12 | 1491.5665        | <b>746.2869</b> |
|         | 385.2445         | 193.1259        | 4  | A      | 11 | 1404.5345        | <b>702.7709</b> |
|         | 552.2429         | 276.6251        | 5  | S[167] | 10 | 1333.4974        | 667.2523        |
|         | <b>719.2413</b>  | <b>360.1243</b> | 6  | S[167] | 9  | <b>1166.4990</b> | 583.7531        |
|         | 832.3253         | 416.6663        | 7  | I      | 8  | <b>999.5006</b>  | <b>500.2540</b> |
|         | <b>969.3842</b>  | 485.1958        | 8  | H      | 7  | <b>886.4166</b>  | 443.7119        |
|         | 1098.4268        | 549.7171        | 9  | E      | 6  | <b>749.3577</b>  | 375.1825        |
|         | <b>1212.4698</b> | 606.7385        | 10 | N      | 5  | <b>620.3151</b>  | 310.6612        |
|         | <b>1359.5382</b> | 680.2727        | 11 | F      | 4  | <b>506.2722</b>  | 253.6397        |
|         | 1456.5909        | 728.7991        | 12 | P      | 3  | <b>359.2037</b>  | 180.1055        |
|         | 1543.6230        | 772.3151        | 13 | S      | 2  | 262.1510         | 131.5791        |
|         |                  |                 | 14 | R      | 1  | 175.1190         | 88.0631         |

# Annotated spectra from Saleem et. al. 2009

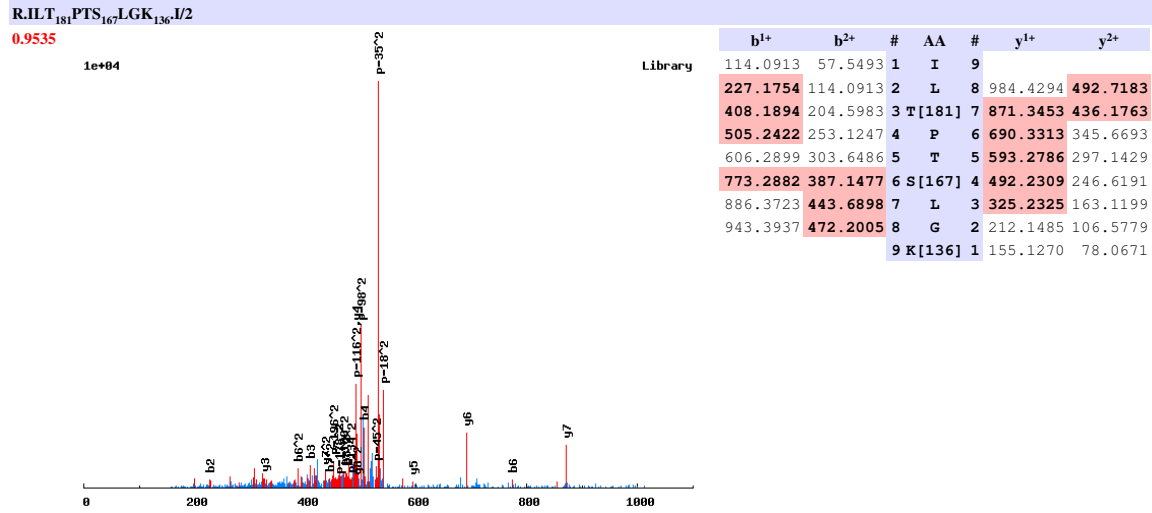

# Annotated spectra from Saleem et. al. 2009

R.I.LT<sub>181</sub>SDATV<sub>167</sub>K<sub>136</sub>K<sub>136</sub>D/2

0.9739

1e+04

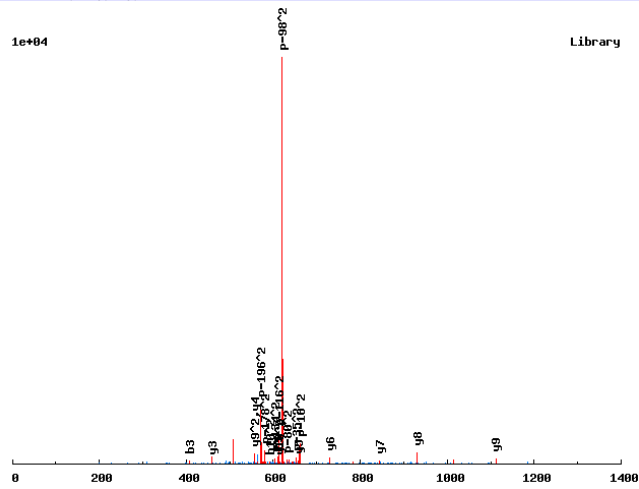

| Library | b <sup>1+</sup> | b <sup>2+</sup> | #  | AA     | #  | y <sup>1+</sup> | y <sup>2+</sup> |
|---------|-----------------|-----------------|----|--------|----|-----------------|-----------------|
|         | 114.0913        | 57.5493         | 1  | I      | 11 |                 |                 |
|         | 227.1754        | 114.0913        | 2  | L      | 10 | 1225.5448       | 613.2760        |
|         | 408.1894        | 204.5983        | 3  | T[181] | 9  | 1112.4607       | 556.7340        |
|         | 495.2214        | 248.1144        | 4  | S      | 8  | 931.4467        | 466.2270        |
|         | 610.2484        | 305.6278        | 5  | D      | 7  | 844.4147        | 422.7110        |
|         | 681.2855        | 341.1464        | 6  | A      | 6  | 729.3877        | 365.1975        |
|         | 782.3332        | 391.6702        | 7  | T      | 5  | 658.3506        | 329.6789        |
|         | 881.4016        | 441.2044        | 8  | V      | 4  | 557.3029        | 279.1551        |
|         | 1048.3999       | 524.7036        | 9  | S[167] | 3  | 458.2345        | 229.6209        |
|         | 1184.5091       | 592.7582        | 10 | K[136] | 2  | 291.2362        | 146.1217        |
|         |                 |                 | 11 | K[136] | 1  | 155.1270        | 78.0671         |

# Annotated spectra from Saleem et. al. 2009

R.INNDENS<sub>167</sub>S<sub>167</sub>.GNEEDEDGNRQEVLDVDAER.E/3

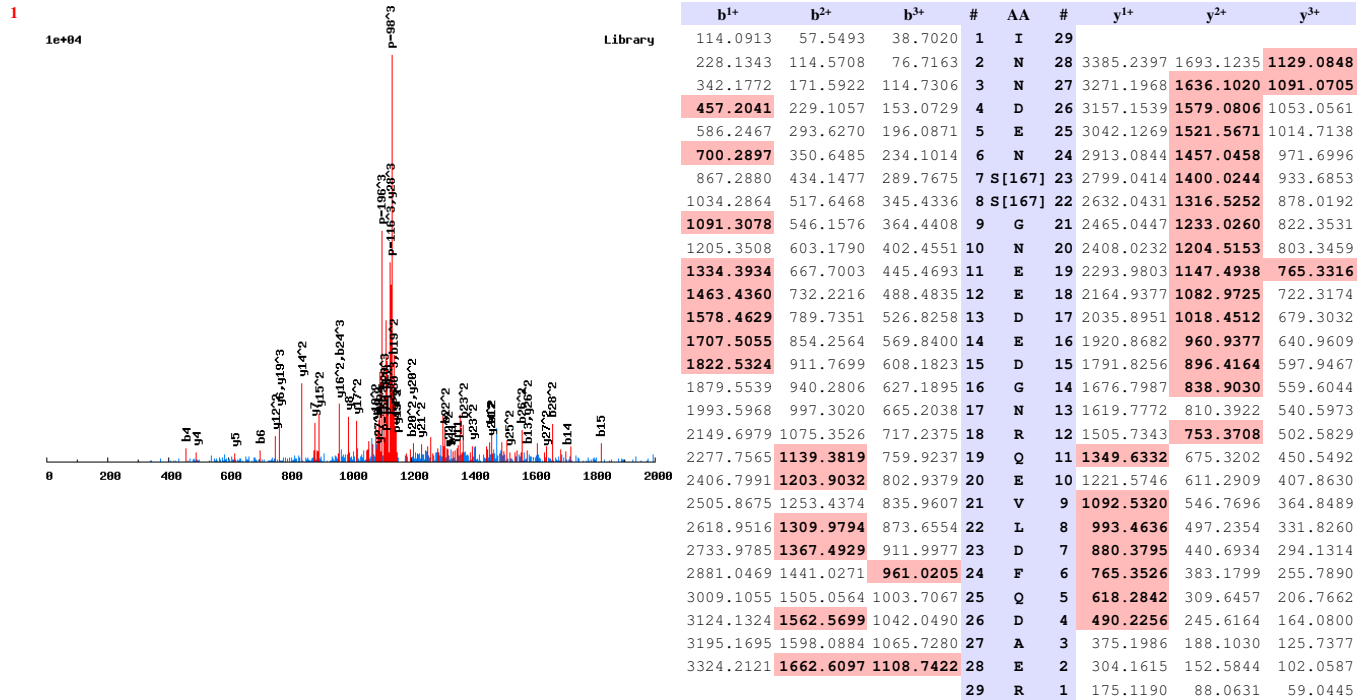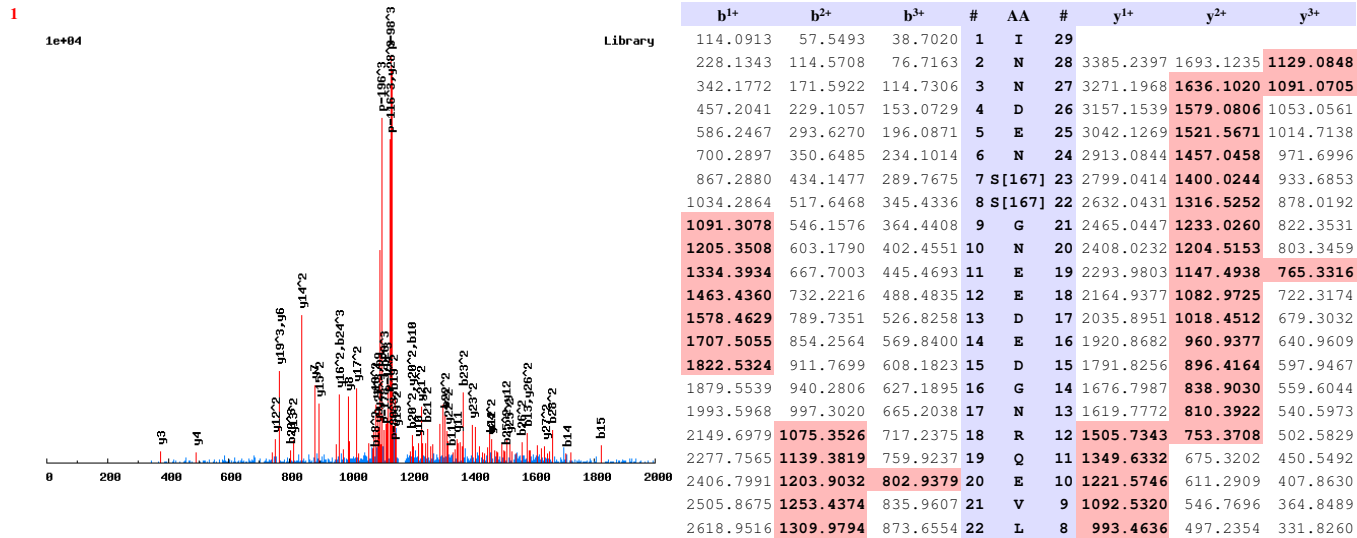

## Annotated spectra from Saleem et. al. 2009

|           |                  |                  |           |          |          |                 |          |          |
|-----------|------------------|------------------|-----------|----------|----------|-----------------|----------|----------|
| 2733.9785 | <b>1367.4929</b> | 911.9977         | <b>23</b> | <b>D</b> | <b>7</b> | <b>880.3795</b> | 440.6934 | 294.1314 |
| 2881.0469 | 1441.0271        | <b>961.0205</b>  | <b>24</b> | <b>F</b> | <b>6</b> | <b>765.3526</b> | 383.1799 | 255.7890 |
| 3009.1055 | <b>1505.0564</b> | 1003.7067        | <b>25</b> | <b>Q</b> | <b>5</b> | 618.2842        | 309.6457 | 206.7662 |
| 3124.1324 | <b>1562.5699</b> | 1042.0490        | <b>26</b> | <b>D</b> | <b>4</b> | <b>490.2256</b> | 245.6164 | 164.0800 |
| 3195.1695 | 1598.0884        | 1065.7280        | <b>27</b> | <b>A</b> | <b>3</b> | <b>375.1986</b> | 188.1030 | 125.7377 |
| 3324.2121 | <b>1662.6097</b> | <b>1108.7422</b> | <b>28</b> | <b>E</b> | <b>2</b> | 304.1615        | 152.5844 | 102.0587 |
|           |                  |                  | <b>29</b> | <b>R</b> | <b>1</b> | 175.1190        | 88.0631  | 59.0445  |

# Annotated spectra from Saleem et. al. 2009

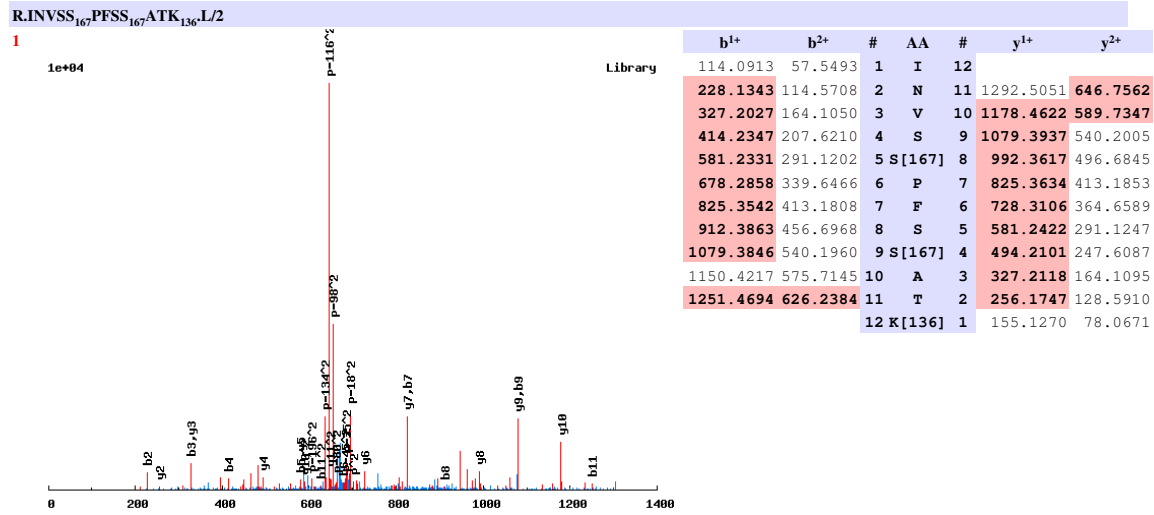

# Annotated spectra from Saleem et. al. 2009

R.IPAQHT<sub>181</sub>KTGT<sub>181</sub>FINSQGT<sub>181</sub>G<sub>181</sub>YK<sub>181</sub>Q<sub>181</sub>

0.8688

1e+04

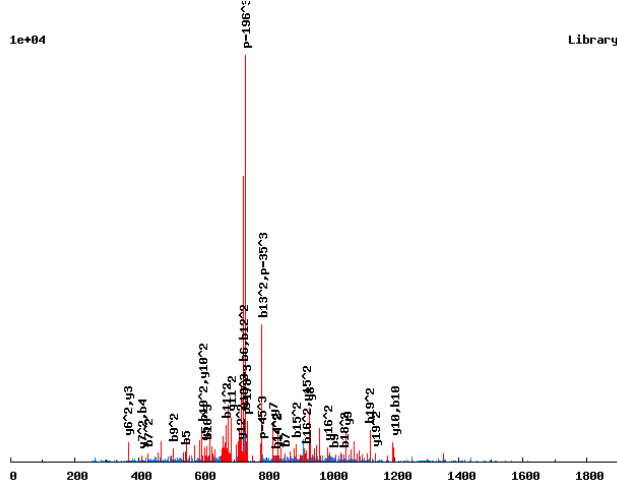

| Library | b <sup>1+</sup> | b <sup>2+</sup> | b <sup>3+</sup> | #  | AA     | #  | y <sup>1+</sup> | y <sup>2+</sup> | y <sup>3+</sup> |
|---------|-----------------|-----------------|-----------------|----|--------|----|-----------------|-----------------|-----------------|
|         | 114.0913        | 57.5493         | 38.7020         | 1  | I      | 20 |                 |                 |                 |
|         | 211.1441        | 106.0757        | 71.0529         | 2  | P      | 19 | 2275.9186       | 1138.4629       | 759.3110        |
|         | 282.1812        | 141.5942        | 94.7319         | 3  | A      | 18 | 2178.8658       | 1089.9365       | 726.9601        |
|         | 410.2398        | 205.6235        | 137.4181        | 4  | Q      | 17 | 2107.8287       | 1054.4180       | 703.2811        |
|         | 547.2987        | 274.1530        | 183.1044        | 5  | H      | 16 | 1979.7701       | 990.3887        | 660.5949        |
|         | 728.3127        | 364.6600        | 243.4424        | 6  | T[181] | 15 | 1842.7112       | 921.8592        | 614.9086        |
|         | 856.4077        | 428.7075        | 286.1407        | 7  | K      | 14 | 1661.6972       | 831.3522        | 554.5706        |
|         | 957.4554        | 479.2313        | 319.8233        | 8  | T      | 13 | 1533.6022       | 767.3048        | 511.8723        |
|         | 1014.4768       | 507.7420        | 338.8305        | 9  | G      | 12 | 1432.5545       | 716.7809        | 478.1897        |
|         | 1195.4908       | 598.2491        | 399.1685        | 10 | T[181] | 11 | 1375.5331       | 688.2702        | 459.1825        |
|         | 1342.5592       | 671.7833        | 448.1913        | 11 | F      | 10 | 1194.5191       | 597.7632        | 398.8445        |
|         | 1455.6433       | 728.3253        | 485.8860        | 12 | I      | 9  | 1047.4507       | 524.2290        | 349.8217        |
|         | 1569.6862       | 785.3468        | 523.9003        | 13 | N      | 8  | 934.3666        | 467.6869        | 312.1271        |
|         | 1656.7183       | 828.8628        | 552.9109        | 14 | S      | 7  | 820.3237        | 410.6655        | 274.1127        |
|         | 1784.7768       | 892.8921        | 595.5971        | 15 | Q      | 6  | 733.2916        | 367.1495        | 245.1021        |
|         | 1841.7983       | 921.4028        | 614.6043        | 16 | G      | 5  | 605.2331        | 303.1202        | 202.4159        |
|         | 2022.8123       | 1011.9098       | 674.9423        | 17 | T[181] | 4  | 548.2116        | 274.6094        | 183.4087        |
|         | 2079.8338       | 1040.4205       | 693.9494        | 18 | G      | 3  | 367.1976        | 184.1024        | 123.0707        |
|         | 2242.8971       | 1121.9522       | 748.3039        | 19 | Y      | 2  | 310.1761        | 155.5917        | 104.0636        |
|         |                 |                 |                 | 20 | K      | 1  | 147.1128        | 74.0600         | 49.7091         |



# Annotated spectra from Saleem et. al. 2009

R.IPAQHT<sub>181</sub>KT<sub>181</sub>GTFINSQGT<sub>181</sub>GYR.Q/3

0.9996

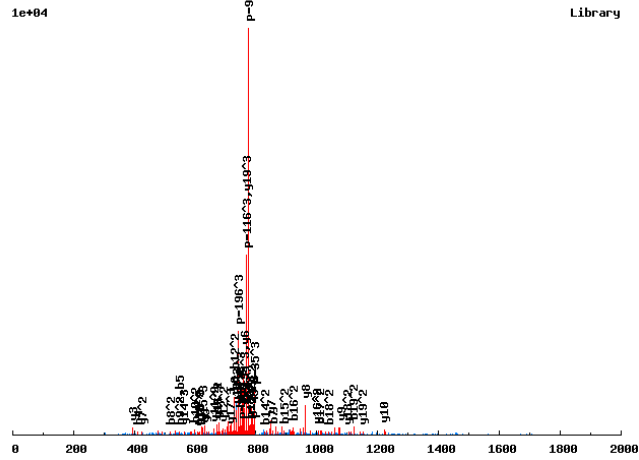

| Library | b <sup>1+</sup> | b <sup>2+</sup> | b <sup>3+</sup> | #  | AA     | #  | y <sup>1+</sup> | y <sup>2+</sup> | y <sup>3+</sup> |
|---------|-----------------|-----------------|-----------------|----|--------|----|-----------------|-----------------|-----------------|
|         | 114.0913        | 57.5493         | 38.7020         | 1  | I      | 20 |                 |                 |                 |
|         | 211.1441        | 106.0757        | 71.0529         | 2  | P      | 19 | 2303.9247       | 1152.4660       | 768.6464        |
|         | 282.1812        | 141.5942        | 94.7319         | 3  | A      | 18 | 2206.8719       | 1103.9396       | 736.2955        |
|         | 410.2398        | 205.6235        | 137.4181        | 4  | Q      | 17 | 2135.8348       | 1068.4211       | 712.6165        |
|         | 547.2987        | 274.1530        | 183.1044        | 5  | H      | 16 | 2007.7763       | 1004.3918       | 669.9303        |
|         | 728.3127        | 364.6600        | 243.4424        | 6  | T[181] | 15 | 1870.7173       | 935.8623        | 624.2440        |
|         | 856.4077        | 428.7075        | 286.1407        | 7  | K      | 14 | 1689.7033       | 845.3553        | 563.9060        |
|         | 1037.4217       | 519.2145        | 346.4787        | 8  | T[181] | 13 | 1561.6084       | 781.3078        | 521.2076        |
|         | 1094.4431       | 547.7252        | 365.4859        | 9  | G      | 12 | 1380.5944       | 690.8008        | 460.8696        |
|         | 1195.4908       | 598.2491        | 399.1685        | 10 | T      | 11 | 1323.5729       | 662.2901        | 441.8625        |
|         | 1342.5592       | 671.7833        | 448.1913        | 11 | F      | 10 | 1222.5252       | 611.7663        | 408.1799        |
|         | 1455.6433       | 728.3253        | 485.8860        | 12 | I      | 9  | 1075.4568       | 538.2320        | 359.1571        |
|         | 1569.6862       | 785.3468        | 523.9003        | 13 | N      | 8  | 962.3728        | 481.6900        | 321.4624        |
|         | 1656.7183       | 828.8628        | 552.9109        | 14 | S      | 7  | 848.3298        | 424.6686        | 283.4481        |
|         | 1784.7768       | 892.8921        | 595.5971        | 15 | Q      | 6  | 761.2978        | 381.1525        | 254.4375        |
|         | 1841.7983       | 921.4028        | 614.6043        | 16 | G      | 5  | 633.2392        | 317.1232        | 211.7513        |
|         | 2022.8123       | 1011.9098       | 674.9423        | 17 | T[181] | 4  | 576.2178        | 288.6125        | 192.7441        |
|         | 2079.8338       | 1040.4205       | 693.9494        | 18 | G      | 3  | 395.2037        | 198.1055        | 132.4061        |
|         | 2242.8971       | 1121.9522       | 748.3039        | 19 | Y      | 2  | 338.1823        | 169.5948        | 113.3989        |
|         |                 |                 |                 | 20 | R      | 1  | 175.1190        | 88.0631         | 59.0445         |

# Annotated spectra from Saleem et. al. 2009

K.IPNSLS<sub>167</sub>K<sub>136</sub>IS<sub>167</sub>TTK<sub>136</sub>L/2

0.5899

1e+04

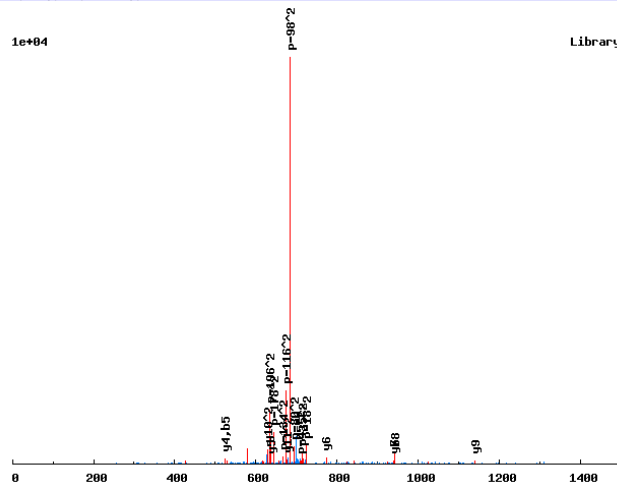

| Library | b <sup>1+</sup> | b <sup>2+</sup> | #  | AA     | #  | y <sup>1+</sup> | y <sup>2+</sup> |
|---------|-----------------|-----------------|----|--------|----|-----------------|-----------------|
|         | 114.0913        | 57.5493         | 1  | I      | 12 |                 |                 |
|         | 211.1441        | 106.0757        | 2  | P      | 11 | 1351.6241       | 676.3157        |
|         | 325.1870        | 163.0972        | 3  | N      | 10 | 1254.5713       | 627.7893        |
|         | 412.2191        | 206.6132        | 4  | S      | 9  | 1140.5284       | 570.7678        |
|         | 525.3031        | 263.1552        | 5  | L      | 8  | 1053.4964       | 527.2518        |
|         | 692.3015        | 346.6544        | 6  | S[167] | 7  | 940.4123        | 470.7098        |
|         | 828.4106        | 414.7090        | 7  | K[136] | 6  | 773.4139        | 387.2106        |
|         | 941.4947        | 471.2510        | 8  | I      | 5  | 637.3048        | 319.1560        |
|         | 1108.4931       | 554.7502        | 9  | S[167] | 4  | 524.2207        | 262.6140        |
|         | 1209.5407       | 605.2740        | 10 | T      | 3  | 357.2224        | 179.1148        |
|         | 1310.5884       | 655.7979        | 11 | T      | 2  | 256.1747        | 128.5910        |
|         |                 |                 | 12 | K[136] | 1  | 155.1270        | 78.0671         |

# Annotated spectra from Saleem et. al. 2009

K.IPQDDDS<sub>167</sub>EK<sub>136</sub>QEER<sub>166</sub>T/2

0.951

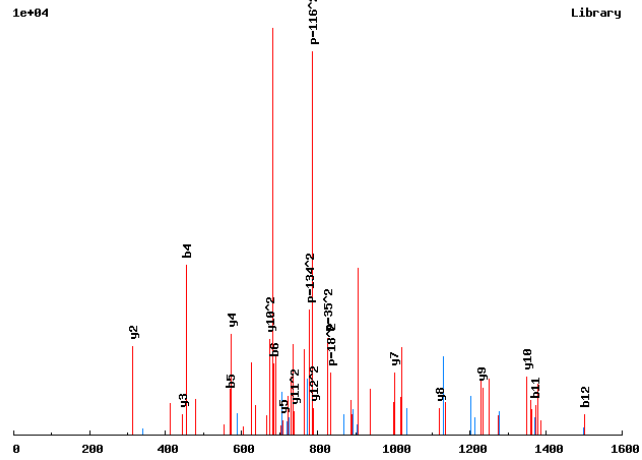

| Library | b <sup>1+</sup>  | b <sup>2+</sup> | #  | AA      | #  | y <sup>1+</sup>  | y <sup>2+</sup> |
|---------|------------------|-----------------|----|---------|----|------------------|-----------------|
|         | 114.0913         | 57.5493         | 1  | I       | 13 |                  |                 |
|         | 211.1441         | 106.0757        | 2  | P       | 12 | 1573.6132        | <b>787.3103</b> |
|         | 339.2027         | 170.1050        | 3  | Q       | 11 | 1476.5605        | <b>738.7839</b> |
|         | <b>454.2296</b>  | 227.6184        | 4  | D       | 10 | <b>1348.5019</b> | <b>674.7546</b> |
|         | <b>569.2566</b>  | 285.1319        | 5  | D       | 9  | <b>1233.4750</b> | 617.2411        |
|         | <b>684.2835</b>  | 342.6454        | 6  | D       | 8  | <b>1118.4480</b> | 559.7277        |
|         | 851.2819         | 426.1446        | 7  | S [167] | 7  | <b>1003.4211</b> | 502.2142        |
|         | 980.3245         | 490.6659        | 8  | E       | 6  | 836.4227         | 418.7150        |
|         | 1116.4336        | 558.7204        | 9  | K [136] | 5  | <b>707.3801</b>  | 354.1937        |
|         | 1244.4922        | 622.7497        | 10 | Q       | 4  | <b>571.2710</b>  | 286.1391        |
|         | <b>1373.5348</b> | 687.2710        | 11 | E       | 3  | <b>443.2124</b>  | 222.1098        |
|         | <b>1502.5774</b> | 751.7923        | 12 | E       | 2  | <b>314.1698</b>  | 157.5885        |
|         |                  |                 | 13 | R [166] | 1  | 185.1272         | 93.0672         |

# Annotated spectra from Saleem et. al. 2009

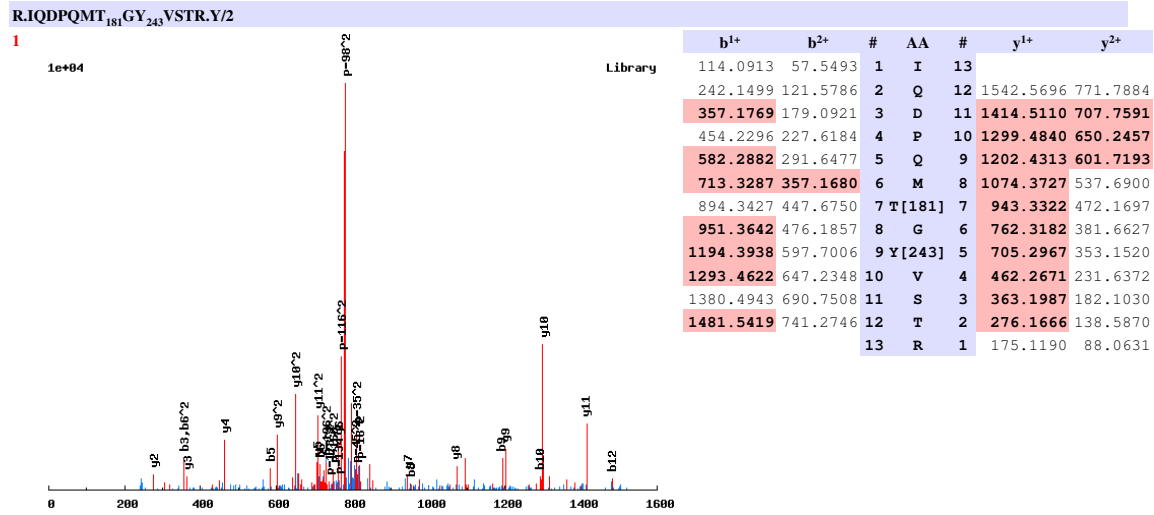

# Annotated spectra from Saleem et. al. 2009

K.IQPNTTSS<sub>167</sub>AAS<sub>167</sub>LPAK.H/2

0.9916

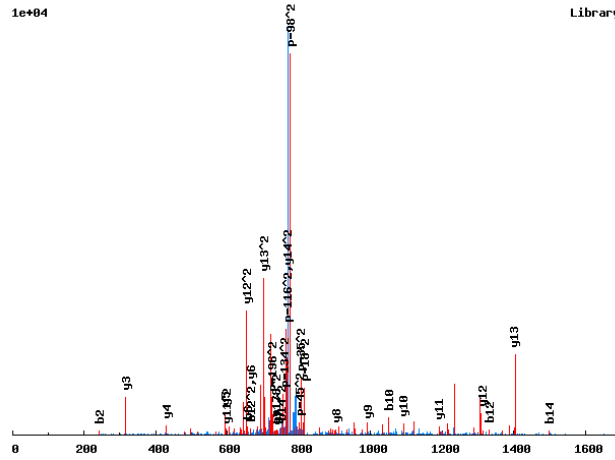

| Library | b <sup>1+</sup>  | b <sup>2+</sup> | #  | AA     | #  | y <sup>1+</sup>  | y <sup>2+</sup> |
|---------|------------------|-----------------|----|--------|----|------------------|-----------------|
|         | 114.0913         | 57.5493         | 1  | I      | 15 |                  |                 |
|         | <b>242.1499</b>  | 121.5786        | 2  | Q      | 14 | 1532.6393        | <b>766.8233</b> |
|         | 339.2027         | 170.1050        | 3  | P      | 13 | 1404.5808        | 702.7940        |
|         | 453.2456         | 227.1264        | 4  | N      | 12 | 1307.5280        | 654.2676        |
|         | 554.2933         | 277.6503        | 5  | T      | 11 | 1193.4851        | 597.2462        |
|         | <b>655.3410</b>  | 328.1741        | 6  | T      | 10 | <b>1092.4374</b> | 546.7223        |
|         | <b>742.3730</b>  | 371.6901        | 7  | S      | 9  | <b>991.3897</b>  | 496.1985        |
|         | 909.3714         | 455.1893        | 8  | S[167] | 8  | <b>904.3577</b>  | 452.6825        |
|         | 980.4085         | 490.7079        | 9  | A      | 7  | <b>737.3593</b>  | 369.1833        |
|         | <b>1051.4456</b> | 526.2264        | 10 | A      | 6  | <b>666.3222</b>  | 333.6647        |
|         | 1218.4439        | 609.7256        | 11 | S[167] | 5  | <b>595.2851</b>  | 298.1462        |
|         | <b>1331.5280</b> | <b>666.2676</b> | 12 | L      | 4  | <b>428.2867</b>  | 214.6470        |
|         | 1428.5808        | 714.7940        | 13 | P      | 3  | <b>315.2027</b>  | 158.1050        |
|         | <b>1499.6179</b> | <b>750.3126</b> | 14 | A      | 2  | 218.1499         | 109.5786        |
|         |                  |                 | 15 | K      | 1  | 147.1128         | 74.0600         |

# Annotated spectra from Saleem et. al. 2009

R.IRSDSVLPNANT<sub>181</sub>ADHNTNS<sub>167</sub>GGEPISSVASNDIIEEK.F/4

0.6986

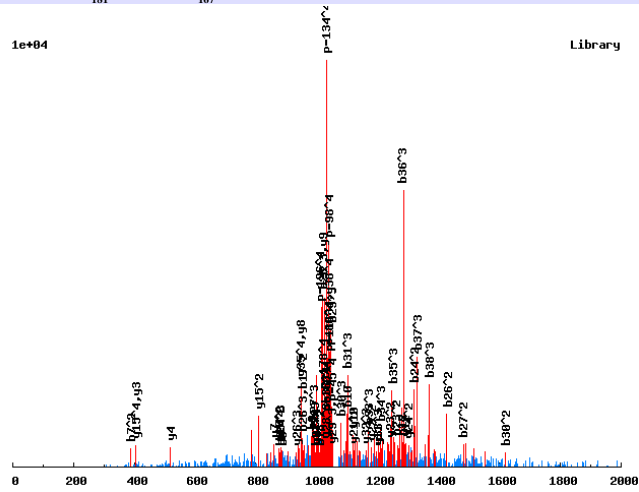

| Library | b <sup>1+</sup> | b <sup>2+</sup> | b <sup>3+</sup> | b <sup>4+</sup> | #  | AA      | #  | y <sup>1+</sup> | y <sup>2+</sup> | y <sup>3+</sup> | y <sup>4+</sup> |
|---------|-----------------|-----------------|-----------------|-----------------|----|---------|----|-----------------|-----------------|-----------------|-----------------|
|         | 114.0913        | 57.5493         | 38.7020         | 29.2783         | 1  | I       | 39 |                 |                 |                 |                 |
|         | 270.1924        | 135.5999        | 90.7357         | 68.3036         | 2  | R       | 38 | 4141.7619       | 2071.3846       | 1381.2588       | 1036.1959       |
|         | 385.2194        | 193.1133        | 129.0780        | 97.0603         | 3  | D       | 37 | 3985.6608       | 1993.3340       | 1329.2251       | 997.1707        |
|         | 472.2514        | 236.6293        | 158.0887        | 118.8183        | 4  | S       | 36 | 3870.6338       | 1935.8206       | 1290.8828       | 968.4139        |
|         | 587.2784        | 294.1428        | 196.4310        | 147.5751        | 5  | D       | 35 | 3783.6018       | 1892.3045       | 1261.8721       | 946.6559        |
|         | 674.3104        | 337.6588        | 225.4417        | 169.3331        | 6  | S       | 34 | 3668.5749       | 1834.7911       | 1223.5298       | 917.8992        |
|         | 773.3788        | 387.1930        | 258.4645        | 194.1002        | 7  | V       | 33 | 3581.5428       | 1791.2751       | 1194.5191       | 896.1412        |
|         | 886.4629        | 443.7351        | 296.1591        | 222.3712        | 8  | L       | 32 | 3482.4744       | 1741.7409       | 1161.4963       | 871.3741        |
|         | 983.5156        | 492.2615        | 328.5101        | 246.6344        | 9  | P       | 31 | 3369.3904       | 1685.1988       | 1123.8016       | 843.1031        |
|         | 1097.5585       | 549.2829        | 366.5244        | 275.1451        | 10 | N       | 30 | 3272.3376       | 1636.6724       | 1091.4507       | 818.8399        |
|         | 1168.5957       | 584.8015        | 390.2034        | 292.9044        | 11 | A       | 29 | 3158.2947       | 1579.6510       | 1053.4364       | 790.3291        |
|         | 1282.6386       | 641.8229        | 428.2177        | 321.4151        | 12 | N       | 28 | 3087.2576       | 1544.1324       | 1029.7574       | 772.5699        |
|         | 1463.6526       | 732.3299        | 488.5557        | 366.6686        | 13 | T [181] | 27 | 2973.2146       | 1487.1110       | 991.7431        | 744.0591        |
|         | 1534.6897       | 767.8485        | 512.2348        | 384.4279        | 14 | A       | 26 | 2792.2006       | 1396.6040       | 931.4051        | 698.8056        |
|         | 1649.7167       | 825.3620        | 550.5771        | 413.1846        | 15 | D       | 25 | 2721.1635       | 1361.0854       | 907.7260        | 681.0463        |
|         | 1786.7756       | 893.8914        | 596.2634        | 447.4494        | 16 | H       | 24 | 2606.1366       | 1303.5719       | 869.3837        | 652.2896        |
|         | 1900.8185       | 950.9129        | 634.2777        | 475.9601        | 17 | N       | 23 | 2469.0777       | 1235.0425       | 823.6974        | 618.0249        |
|         | 2014.8614       | 1007.9344       | 672.2920        | 504.4708        | 18 | N       | 22 | 2355.0347       | 1178.0210       | 785.6831        | 589.5141        |
|         | 2115.9091       | 1058.4582       | 705.9746        | 529.7327        | 19 | T       | 21 | 2240.9918       | 1120.9995       | 747.6688        | 561.0034        |
|         | 2229.9520       | 1115.4797       | 743.9889        | 558.2435        | 20 | N       | 20 | 2139.9441       | 1070.4757       | 713.9862        | 535.7415        |
|         | 2396.9504       | 1198.9788       | 799.6550        | 599.9931        | 21 | S [167] | 19 | 2025.9012       | 1013.4542       | 675.9719        | 507.2308        |
|         | 2453.9719       | 1227.4896       | 818.6621        | 614.2484        | 22 | G       | 18 | 1858.9028       | 929.9551        | 620.3058        | 465.4812        |
|         | 2510.9933       | 1256.0003       | 837.6693        | 628.5038        | 23 | G       | 17 | 1801.8814       | 901.4443        | 601.2986        | 451.2258        |
|         | 2640.0359       | 1320.5216       | 880.6835        | 660.7644        | 24 | E       | 16 | 1744.8599       | 872.9336        | 582.2915        | 436.9704        |
|         | 2737.0887       | 1369.0480       | 913.0344        | 685.0276        | 25 | P       | 15 | 1615.8173       | 808.4123        | 539.2773        | 404.7098        |
|         | 2850.1727       | 1425.5900       | 950.7291        | 713.2986        | 26 | I       | 14 | 1518.7646       | 759.8859        | 506.9264        | 380.4466        |
|         | 2964.2157       | 1482.6115       | 988.7434        | 741.8094        | 27 | N       | 13 | 1405.6805       | 703.3439        | 469.2317        | 352.1756        |
|         | 3051.2477       | 1526.1275       | 1017.7541       | 763.5674        | 28 | S       | 12 | 1291.6376       | 646.3224        | 431.2174        | 323.6649        |
|         | 3138.2797       | 1569.6435       | 1046.7648       | 785.3254        | 29 | S       | 11 | 1204.6055       | 602.8064        | 402.2067        | 301.9068        |
|         | 3237.3481       | 1619.1777       | 1079.7876       | 810.0925        | 30 | V       | 10 | 1117.5735       | 559.2904        | 373.1960        | 280.1488        |
|         | 3308.3852       | 1654.6963       | 1103.4666       | 827.8518        | 31 | A       | 9  | 1018.5051       | 509.7562        | 340.1732        | 255.3817        |
|         | 3395.4173       | 1698.2123       | 1132.4773       | 849.6098        | 32 | S       | 8  | 947.4680        | 474.2376        | 316.4942        | 237.6225        |
|         | 3509.4602       | 1755.2337       | 1170.4916       | 878.1205        | 33 | N       | 7  | 860.4360        | 430.7216        | 287.4835        | 215.8645        |
|         | 3624.4871       | 1812.7472       | 1208.8339       | 906.8772        | 34 | D       | 6  | 746.3930        | 373.7002        | 249.4692        | 187.3537        |
|         | 3737.5712       | 1869.2892       | 1246.5286       | 935.1483        | 35 | I       | 5  | 631.3661        | 316.1867        | 211.1269        | 158.5970        |
|         | 3850.6553       | 1925.8313       | 1284.2233       | 963.4193        | 36 | I       | 4  | 518.2820        | 259.6447        | 173.4322        | 130.3260        |
|         | 3979.6978       | 1990.3526       | 1327.2375       | 995.6799        | 37 | E       | 3  | 405.1980        | 203.1026        | 135.7375        | 102.0550        |
|         | 4108.7404       | 2054.8739       | 1370.2517       | 1027.9406       | 38 | E       | 2  | 276.1554        | 138.5813        | 92.7233         | 69.7943         |
|         |                 |                 |                 |                 | 39 | K       | 1  | 147.1128        | 74.0600         | 49.7091         | 37.5337         |

# Annotated spectra from Saleem et. al. 2009

R.I.S.I.D.S.<sub>167</sub>S<sub>167</sub>DEESELK.K.E/2

0.9918

1e+04

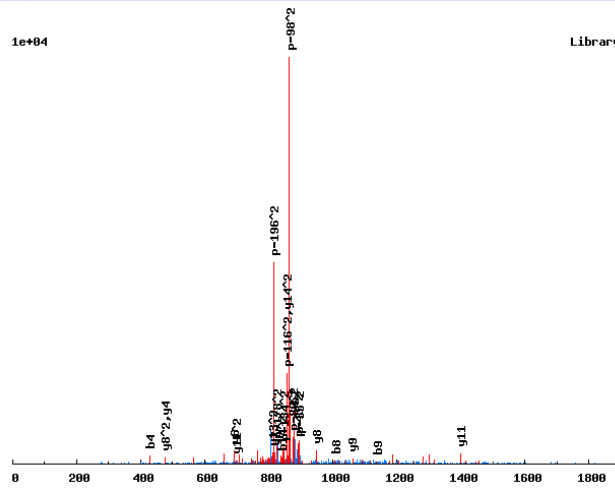

| Library | b <sup>1+</sup> | b <sup>2+</sup> | #  | AA     | #  | y <sup>1+</sup> | y <sup>2+</sup> |
|---------|-----------------|-----------------|----|--------|----|-----------------|-----------------|
|         | 114.0913        | 57.5493         | 1  | I      | 15 |                 |                 |
|         | 201.1234        | 101.0653        | 2  | S      | 14 | 1713.6503       | 857.3288        |
|         | 314.2074        | 157.6074        | 3  | I      | 13 | 1626.6183       | 813.8128        |
|         | 429.2344        | 215.1208        | 4  | D      | 12 | 1513.5343       | 757.2708        |
|         | 596.2327        | 298.6200        | 5  | S[167] | 11 | 1398.5073       | 699.7573        |
|         | 763.2311        | 382.1192        | 6  | S[167] | 10 | 1231.5090       | 616.2581        |
|         | 878.2580        | 439.6327        | 7  | D      | 9  | 1064.5106       | 532.7589        |
|         | 1007.3006       | 504.1540        | 8  | E      | 8  | 949.4837        | 475.2455        |
|         | 1136.3432       | 568.6752        | 9  | E      | 7  | 820.4411        | 410.7242        |
|         | 1223.3752       | 612.1913        | 10 | S      | 6  | 691.3985        | 346.2029        |
|         | 1352.4178       | 676.7126        | 11 | E      | 5  | 604.3664        | 302.6869        |
|         | 1465.5019       | 733.2546        | 12 | L      | 4  | 475.3238        | 238.1656        |
|         | 1552.5339       | 776.7706        | 13 | S      | 3  | 362.2398        | 181.6235        |
|         | 1680.6289       | 840.8181        | 14 | K      | 2  | 275.2078        | 138.1075        |
|         |                 |                 | 15 | K      | 1  | 147.1128        | 74.0600         |

Annotated spectra from Saleem et. al. 2009

K<sub>157</sub>I<sub>167</sub>GNK<sub>136</sub>S<sub>167</sub>SGK<sub>136</sub>EDANDC<sub>160</sub>K<sub>136</sub>S/2

0.5867

1e+04

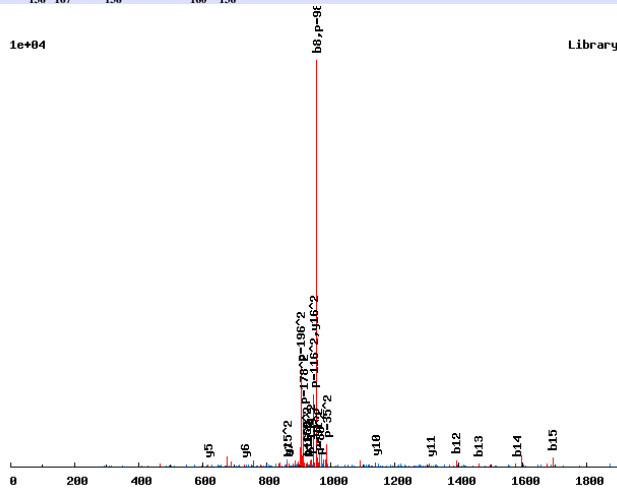

| Library | b <sup>1+</sup> | b <sup>2+</sup> | #  | AA     | #  | y <sup>1+</sup> | y <sup>2+</sup> |
|---------|-----------------|-----------------|----|--------|----|-----------------|-----------------|
|         | 114.0913        | 57.5493         | 1  | I      | 17 |                 |                 |
|         | 281.0897        | 141.0485        | 2  | S[167] | 16 | 1893.7511       | 947.3792        |
|         | 394.1738        | 197.5905        | 3  | I      | 15 | 1726.7528       | 863.8800        |
|         | 451.1952        | 226.1013        | 4  | G      | 14 | 1613.6687       | 807.3380        |
|         | 565.2382        | 283.1227        | 5  | N      | 13 | 1556.6473       | 778.8273        |
|         | 701.3473        | 351.1773        | 6  | K[136] | 12 | 1442.6043       | 721.8058        |
|         | 868.3457        | 434.6765        | 7  | S[167] | 11 | 1306.4952       | 653.7512        |
|         | 955.3777        | 478.1925        | 8  | S      | 10 | 1139.4968       | 570.2520        |
|         | 1012.3992       | 506.7032        | 9  | G      | 9  | 1052.4648       | 526.7360        |
|         | 1148.5083       | 574.7578        | 10 | K[136] | 8  | 995.4433        | 498.2253        |
|         | 1277.5509       | 639.2791        | 11 | E      | 7  | 859.3342        | 430.1707        |
|         | 1392.5778       | 696.7926        | 12 | D      | 6  | 730.2916        | 365.6494        |
|         | 1463.6150       | 732.3111        | 13 | A      | 5  | 615.2646        | 308.1360        |
|         | 1577.6579       | 789.3326        | 14 | N      | 4  | 544.2275        | 272.6174        |
|         | 1692.6848       | 846.8461        | 15 | D      | 3  | 430.1846        | 215.5959        |
|         | 1852.7155       | 926.8614        | 16 | C[160] | 2  | 315.1577        | 158.0825        |
|         |                 |                 | 17 | K[136] | 1  | 155.1270        | 78.0671         |



# Annotated spectra from Saleem et. al. 2009

K.IISKQET<sub>181</sub>S<sub>167</sub>EEEDTAGKHEQR.E/3

0.9995

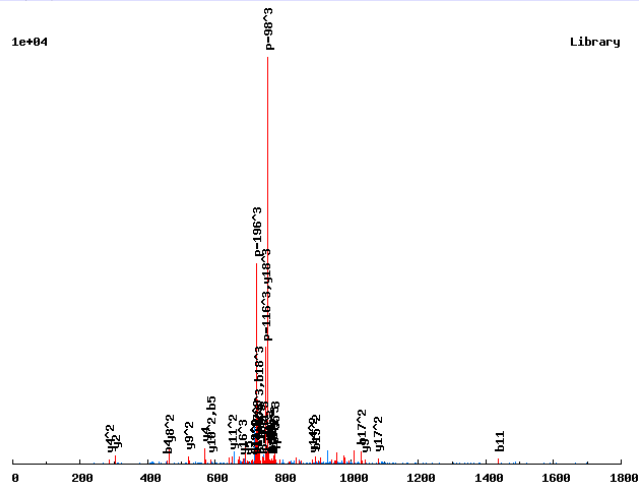

| Library | b <sup>1+</sup> | b <sup>2+</sup> | b <sup>3+</sup> | #  | AA     | #  | y <sup>1+</sup> | y <sup>2+</sup> | y <sup>3+</sup> |
|---------|-----------------|-----------------|-----------------|----|--------|----|-----------------|-----------------|-----------------|
|         | 114.0913        | 57.5493         | 38.7020         | 1  | I      | 19 |                 |                 |                 |
|         | 201.1234        | 101.0653        | 67.7126         | 2  | S      | 18 | 2248.8755       | 1124.9414       | 750.2967        |
|         | 329.2183        | 165.1128        | 110.4110        | 3  | K      | 17 | 2161.8435       | 1081.4254       | 721.2860        |
|         | 457.2769        | 229.1421        | 153.0972        | 4  | Q      | 16 | 2033.7485       | 1017.3779       | 678.5877        |
|         | 586.3195        | 293.6634        | 196.1114        | 5  | E      | 15 | 1905.6899       | 953.3486        | 635.9015        |
|         | 767.3335        | 384.1704        | 256.4494        | 6  | T[181] | 14 | 1776.6473       | 888.8273        | 592.8873        |
|         | 934.3319        | 467.6696        | 312.1155        | 7  | S[167] | 13 | 1595.6333       | 798.3203        | 532.5493        |
|         | 1063.3745       | 532.1909        | 355.1297        | 8  | E      | 12 | 1428.6350       | 714.8211        | 476.8832        |
|         | 1192.4171       | 596.7122        | 398.1439        | 9  | E      | 11 | 1299.5924       | 650.2998        | 433.8690        |
|         | 1321.4596       | 661.2335        | 441.1581        | 10 | E      | 10 | 1170.5498       | 585.7785        | 390.8548        |
|         | 1436.4866       | 718.7469        | 479.5004        | 11 | D      | 9  | 1041.5072       | 521.2572        | 347.8406        |
|         | 1537.5343       | 769.2708        | 513.1829        | 12 | T      | 8  | 926.4802        | 463.7438        | 309.4983        |
|         | 1608.5714       | 804.7893        | 536.8620        | 13 | A      | 7  | 825.4326        | 413.2199        | 275.8157        |
|         | 1665.5928       | 833.3001        | 555.8691        | 14 | G      | 6  | 754.3955        | 377.7014        | 252.1367        |
|         | 1793.6878       | 897.3475        | 598.5675        | 15 | K      | 5  | 697.3740        | 349.1906        | 233.1295        |
|         | 1930.7467       | 965.8770        | 644.2538        | 16 | H      | 4  | 569.2790        | 285.1432        | 190.4312        |
|         | 2059.7893       | 1030.3983       | 687.2680        | 17 | E      | 3  | 432.2201        | 216.6137        | 144.7449        |
|         | 2187.8479       | 1094.4276       | 729.9541        | 18 | Q      | 2  | 303.1775        | 152.0924        | 101.7307        |
|         |                 |                 |                 | 19 | R      | 1  | 175.1190        | 88.0631         | 59.0445         |

# Annotated spectra from Saleem et. al. 2009

R.I.S<sub>167</sub>LNHSPKK.L/3

0.7521

1e+04

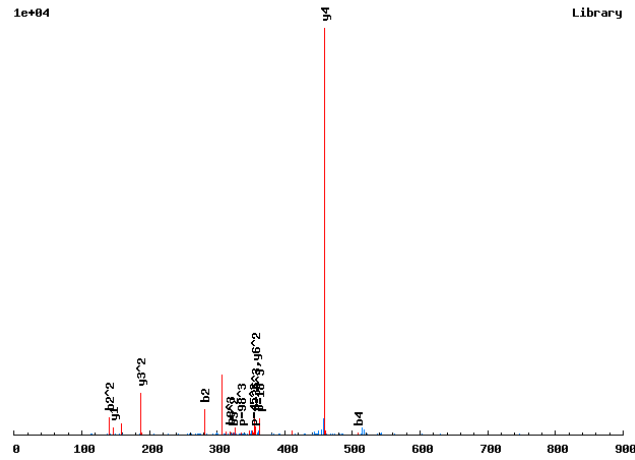

| Library | b <sup>1+</sup> | b <sup>2+</sup> | b <sup>3+</sup> | # | AA     | # | y <sup>1+</sup> | y <sup>2+</sup> | y <sup>3+</sup> |
|---------|-----------------|-----------------|-----------------|---|--------|---|-----------------|-----------------|-----------------|
|         | 114.0913        | 57.5493         | 38.7020         | 1 | I      | 9 |                 |                 |                 |
|         | 281.0897        | 141.0485        | 94.3681         | 2 | S[167] | 8 | 990.4768        | 495.7420        | 330.8305        |
|         | 394.1738        | 197.5905        | 132.0628        | 3 | L      | 7 | 823.4785        | 412.2429        | 275.1643        |
|         | 508.2167        | 254.6120        | 170.0771        | 4 | N      | 6 | 710.3944        | 355.7008        | 237.4697        |
|         | 645.2756        | 323.1414        | 215.7634        | 5 | H      | 5 | 596.3515        | 298.6794        | 199.4553        |
|         | 732.3076        | 366.6575        | 244.7741        | 6 | S      | 4 | 459.2926        | 230.1499        | 153.7690        |
|         | 829.3604        | 415.1838        | 277.1250        | 7 | P      | 3 | 372.2605        | 186.6339        | 124.7584        |
|         | 957.4554        | 479.2313        | 319.8233        | 8 | K      | 2 | 275.2078        | 138.1075        | 92.4074         |
|         |                 |                 |                 | 9 | K      | 1 | 147.1128        | 74.0600         | 49.7091         |

# Annotated spectra from Saleem et. al. 2009

K.ISLSPS<sub>167</sub>TES<sub>167</sub>LADSK.S/2

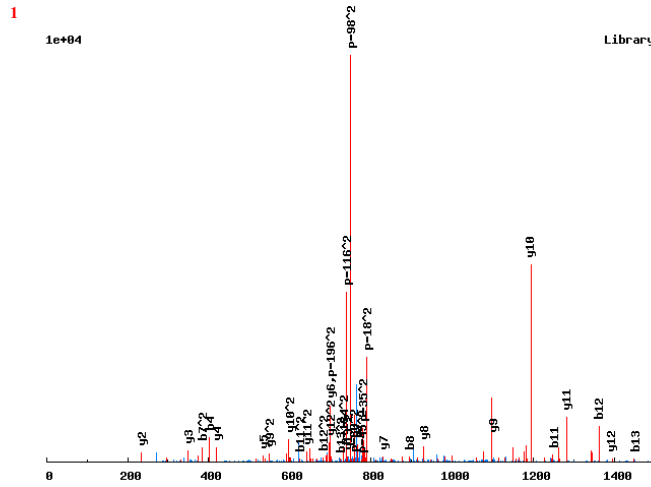

| Library | b <sup>1+</sup> | b <sup>2+</sup> | #  | AA      | #  | y <sup>1+</sup> | y <sup>2+</sup> |
|---------|-----------------|-----------------|----|---------|----|-----------------|-----------------|
|         | 114.0913        | 57.5493         | 1  | I       | 14 |                 |                 |
|         | 201.1234        | 101.0653        | 2  | S       | 13 | 1481.5808       | 741.2940        |
|         | 314.2074        | 157.6074        | 3  | L       | 12 | 1394.5488       | 697.7780        |
|         | 401.2395        | 201.1234        | 4  | S       | 11 | 1281.4647       | 641.2360        |
|         | 498.2922        | 249.6497        | 5  | P       | 10 | 1194.4327       | 597.7200        |
|         | 665.2906        | 333.1489        | 6  | S [167] | 9  | 1097.3799       | 549.1936        |
|         | 766.3383        | 383.6728        | 7  | T       | 8  | 930.3816        | 465.6944        |
|         | 895.3809        | 448.1941        | 8  | E       | 7  | 829.3339        | 415.1706        |
|         | 1062.3792       | 531.6932        | 9  | S [167] | 6  | 700.2913        | 350.6493        |
|         | 1175.4633       | 588.2353        | 10 | L       | 5  | 533.2929        | 267.1501        |
|         | 1246.5004       | 623.7538        | 11 | A       | 4  | 420.2089        | 210.6081        |
|         | 1361.5273       | 681.2673        | 12 | D       | 3  | 349.1718        | 175.0895        |
|         | 1448.5594       | 724.7833        | 13 | S       | 2  | 234.1448        | 117.5761        |
|         |                 |                 | 14 | K       | 1  | 147.1128        | 74.0600         |

# Annotated spectra from Saleem et. al. 2009

K.ISNALDGS<sub>167</sub>HSVMDLK.Q/3

0.9976

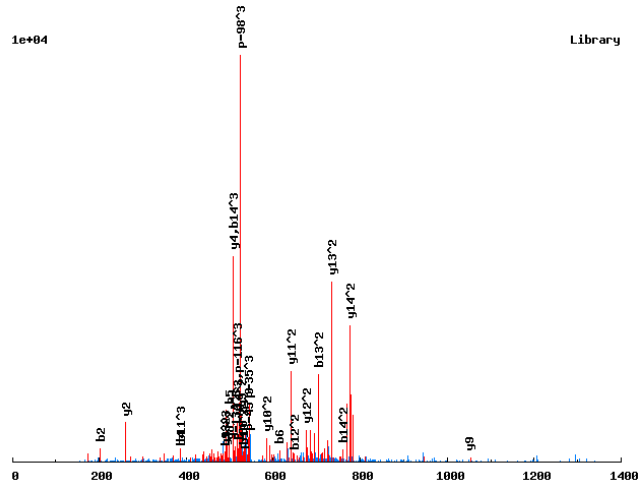

| Library | b <sup>1+</sup> | b <sup>2+</sup> | b <sup>3+</sup> | #  | AA     | #  | y <sup>1+</sup> | y <sup>2+</sup> | y <sup>3+</sup> |
|---------|-----------------|-----------------|-----------------|----|--------|----|-----------------|-----------------|-----------------|
|         | 114.0913        | 57.5493         | 38.7020         | 1  | I      | 15 |                 |                 |                 |
|         | 201.1234        | 101.0653        | 67.7126         | 2  | S      | 14 | 1553.6665       | 777.3369        | 518.5604        |
|         | 315.1663        | 158.0868        | 105.7270        | 3  | N      | 13 | 1466.6345       | 733.8209        | 489.5497        |
|         | 386.2034        | 193.6053        | 129.4060        | 4  | A      | 12 | 1352.5916       | 676.7994        | 451.5354        |
|         | 499.2875        | 250.1474        | 167.1007        | 5  | L      | 11 | 1281.5545       | 641.2809        | 427.8563        |
|         | 614.3144        | 307.6608        | 205.4430        | 6  | D      | 10 | 1168.4704       | 584.7388        | 390.1617        |
|         | 671.3359        | 336.1716        | 224.4501        | 7  | G      | 9  | 1053.4435       | 527.2254        | 351.8193        |
|         | 838.3342        | 419.6708        | 280.1163        | 8  | S[167] | 8  | 996.4220        | 498.7146        | 332.8122        |
|         | 975.3931        | 488.2002        | 325.8026        | 9  | H      | 7  | 829.4236        | 415.2155        | 277.1461        |
|         | 1062.4252       | 531.7162        | 354.8132        | 10 | S      | 6  | 692.3647        | 346.6860        | 231.4598        |
|         | 1161.4936       | 581.2504        | 387.8360        | 11 | V      | 5  | 605.3327        | 303.1700        | 202.4491        |
|         | 1292.5341       | 646.7707        | 431.5162        | 12 | M      | 4  | 506.2643        | 253.6358        | 169.4263        |
|         | 1407.5610       | 704.2841        | 469.8585        | 13 | D      | 3  | 375.2238        | 188.1155        | 125.7461        |
|         | 1520.6451       | 760.8262        | 507.5532        | 14 | L      | 2  | 260.1969        | 130.6021        | 87.4038         |
|         |                 |                 |                 | 15 | K      | 1  | 147.1128        | 74.0600         | 49.7091         |

# Annotated spectra from Saleem et. al. 2009

R.ISSASTPQTSQGR<sub>166</sub>FT<sub>181</sub>APT<sub>181</sub>SPSTSSPK<sub>136</sub>A/3

0.8753

1e+04

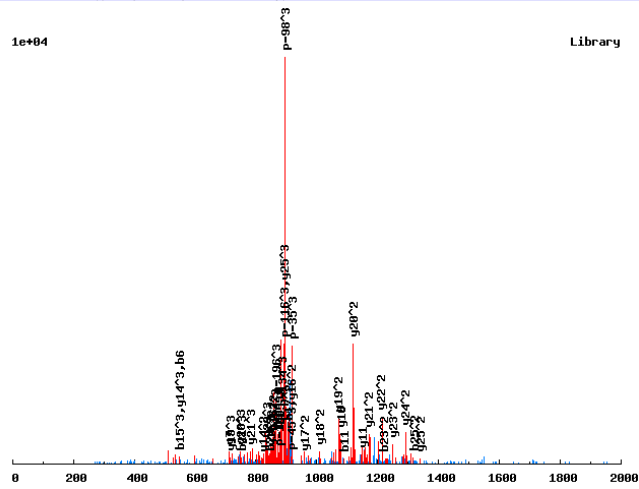

| Library | b <sup>1+</sup> | b <sup>2+</sup> | b <sup>3+</sup> | #  | AA     | #  | y <sup>1+</sup> | y <sup>2+</sup> | y <sup>3+</sup> |
|---------|-----------------|-----------------|-----------------|----|--------|----|-----------------|-----------------|-----------------|
|         | 114.0913        | 57.5493         | 38.7020         | 1  | I      | 26 |                 |                 |                 |
|         | 201.1234        | 101.0653        | 67.7126         | 2  | S      | 25 | 2673.1560       | 1337.0816       | 891.7235        |
|         | 288.1554        | 144.5813        | 96.7233         | 3  | S      | 24 | 2586.1239       | 1293.5656       | 862.7128        |
|         | 359.1925        | 180.0999        | 120.4024        | 4  | A      | 23 | 2499.0919       | 1250.0496       | 833.7022        |
|         | 446.2245        | 223.6159        | 149.4130        | 5  | S      | 22 | 2428.0548       | 1214.5310       | 810.0231        |
|         | 547.2722        | 274.1398        | 183.0956        | 6  | T      | 21 | 2341.0228       | 1171.0150       | 781.0124        |
|         | 644.3250        | 322.6661        | 215.4465        | 7  | P      | 20 | 2239.9751       | 1120.4912       | 747.3299        |
|         | 772.3836        | 386.6954        | 258.1327        | 8  | Q      | 19 | 2142.9223       | 1071.9648       | 714.9790        |
|         | 873.4312        | 437.2193        | 291.8153        | 9  | T      | 18 | 2014.8637       | 1007.9355       | 672.2928        |
|         | 960.4633        | 480.7353        | 320.8259        | 10 | S      | 17 | 1913.8161       | 957.4117        | 638.6102        |
|         | 1088.5219       | 544.7646        | 363.5121        | 11 | Q      | 16 | 1826.7840       | 913.8957        | 609.5995        |
|         | 1145.5433       | 573.2753        | 382.5193        | 12 | G      | 15 | 1698.7255       | 849.8664        | 566.9133        |
|         | 1311.6527       | 656.3300        | 437.8891        | 13 | R[166] | 14 | 1641.7040       | 821.3556        | 547.9062        |
|         | 1458.7211       | 729.8642        | 486.9119        | 14 | F      | 13 | 1475.5946       | 738.3010        | 492.5364        |
|         | 1639.7351       | 820.3712        | 547.2499        | 15 | T[181] | 12 | 1328.5262       | 664.7667        | 443.5136        |
|         | 1710.7722       | 855.8898        | 570.9289        | 16 | A      | 11 | 1147.5122       | 574.2597        | 383.1756        |
|         | 1807.8250       | 904.4161        | 603.2798        | 17 | P      | 10 | 1076.4751       | 538.7412        | 359.4966        |
|         | 1988.8390       | 994.9231        | 663.6179        | 18 | T[181] | 9  | 979.4223        | 490.2148        | 327.1456        |
|         | 2075.8710       | 1038.4392       | 692.6285        | 19 | S      | 8  | 798.4083        | 399.7078        | 266.8076        |
|         | 2172.9238       | 1086.9655       | 724.9794        | 20 | P      | 7  | 711.3763        | 356.1918        | 237.7969        |
|         | 2259.9558       | 1130.4815       | 753.9901        | 21 | S      | 6  | 614.3235        | 307.6654        | 205.4460        |
|         | 2361.0035       | 1181.0054       | 787.6727        | 22 | T      | 5  | 527.2915        | 264.1494        | 176.4354        |
|         | 2448.0355       | 1224.5214       | 816.6834        | 23 | S      | 4  | 426.2438        | 213.6255        | 142.7528        |
|         | 2535.0676       | 1268.0374       | 845.6940        | 24 | S      | 3  | 339.2118        | 170.1095        | 113.7421        |
|         | 2632.1203       | 1316.5638       | 878.0450        | 25 | P      | 2  | 252.1798        | 126.5935        | 84.7314         |
|         |                 |                 |                 | 26 | K[136] | 1  | 155.1270        | 78.0671         | 52.3805         |

# Annotated spectra from Saleem et. al. 2009

R.ISSGQDERHS<sub>167</sub>S<sub>167</sub>PDPYGINDK.F/3

0.9999

1e+04

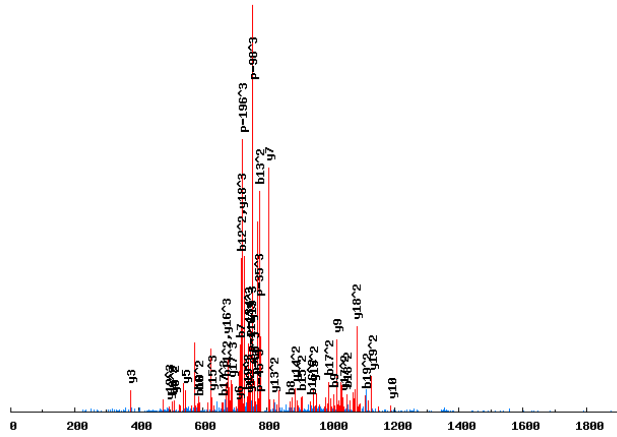

| Library | b <sup>1+</sup> | b <sup>2+</sup> | b <sup>3+</sup> | #  | AA     | #  | y <sup>1+</sup> | y <sup>2+</sup> | y <sup>3+</sup> |
|---------|-----------------|-----------------|-----------------|----|--------|----|-----------------|-----------------|-----------------|
|         | 114.0913        | 57.5493         | 38.7020         | 1  | I      | 20 |                 |                 |                 |
|         | 201.1234        | 101.0653        | 67.7126         | 2  | S      | 19 | 2248.8544       | 1124.9308       | 750.2896        |
|         | 288.1554        | 144.5813        | 96.7233         | 3  | S      | 18 | 2161.8223       | 1081.4148       | 721.2790        |
|         | 345.1769        | 173.0921        | 115.7305        | 4  | G      | 17 | 2074.7903       | 1037.8988       | 692.2683        |
|         | 473.2354        | 237.1214        | 158.4167        | 5  | Q      | 16 | 2017.7688       | 1009.3881       | 673.2611        |
|         | 588.2624        | 294.6348        | 196.7590        | 6  | D      | 15 | 1889.7103       | 945.3588        | 630.5749        |
|         | 717.3050        | 359.1561        | 239.7732        | 7  | E      | 14 | 1774.6833       | 887.8453        | 592.2326        |
|         | 873.4061        | 437.2067        | 291.8069        | 8  | R      | 13 | 1645.6407       | 823.3240        | 549.2184        |
|         | 1010.4650       | 505.7361        | 337.4932        | 9  | H      | 12 | 1489.5396       | 745.2734        | 497.1847        |
|         | 1177.4634       | 589.2353        | 393.1593        | 10 | S[167] | 11 | 1352.4807       | 676.7440        | 451.4984        |
|         | 1344.4617       | 672.7345        | 448.8254        | 11 | S[167] | 10 | 1185.4823       | 593.2448        | 395.8323        |
|         | 1441.5145       | 721.2609        | 481.1763        | 12 | P      | 9  | 1018.4840       | 509.7456        | 340.1662        |
|         | 1556.5414       | 778.7743        | 519.5187        | 13 | D      | 8  | 921.4312        | 461.2193        | 307.8153        |
|         | 1653.5942       | 827.3007        | 551.8696        | 14 | P      | 7  | 806.4043        | 403.7058        | 269.4729        |
|         | 1816.6575       | 908.8324        | 606.2240        | 15 | Y      | 6  | 709.3515        | 355.1794        | 237.1220        |
|         | 1873.6790       | 937.3431        | 625.2312        | 16 | G      | 5  | 546.2882        | 273.6477        | 182.7676        |
|         | 1986.7630       | 993.8852        | 662.9259        | 17 | I      | 4  | 489.2667        | 245.1370        | 163.7604        |
|         | 2100.8060       | 1050.9066       | 700.9402        | 18 | N      | 3  | 376.1827        | 188.5950        | 126.0657        |
|         | 2215.8329       | 1108.4201       | 739.2825        | 19 | D      | 2  | 262.1397        | 131.5735        | 88.0514         |
|         |                 |                 |                 | 20 | K      | 1  | 147.1128        | 74.0600         | 49.7091         |

# Annotated spectra from Saleem et. al. 2009

R.ISS<sub>167</sub>PLLSR.M/2

0.9918

1e+04

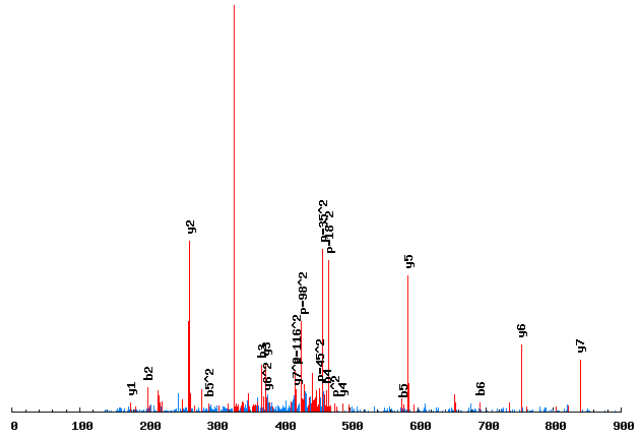

Library

| b <sup>1+</sup> | b <sup>2+</sup> | # | AA     | # | y <sup>1+</sup> | y <sup>2+</sup> |
|-----------------|-----------------|---|--------|---|-----------------|-----------------|
| 114.0913        | 57.5493         | 1 | I      | 8 |                 |                 |
| 201.1234        | 101.0653        | 2 | S      | 7 | 839.4023        | 420.2048        |
| 368.1217        | 184.5645        | 3 | S[167] | 6 | 752.3702        | 376.6888        |
| 465.1745        | 233.0909        | 4 | P      | 5 | 585.3719        | 293.1896        |
| 578.2586        | 289.6329        | 5 | L      | 4 | 488.3191        | 244.6632        |
| 691.3426        | 346.1749        | 6 | L      | 3 | 375.2350        | 188.1212        |
| 778.3746        | 389.6910        | 7 | S      | 2 | 262.1510        | 131.5791        |
|                 |                 | 8 | R      | 1 | 175.1190        | 88.0631         |

# Annotated spectra from Saleem et. al. 2009

R.I.T.S.Q.G.D.L.E.A.D.G.S.S.<sub>167</sub>.D.E.E.T.<sub>181</sub>.E.Q.E.P.H.S.K.<sub>136</sub>.R/3

0.7484

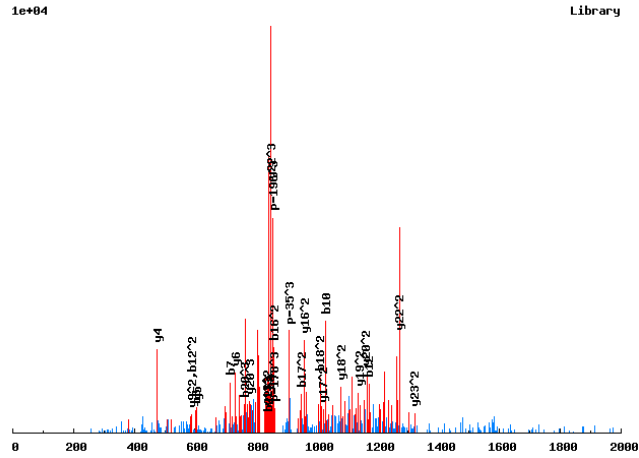

| Library | b <sup>1+</sup> | b <sup>2+</sup> | b <sup>3+</sup> | #  | AA     | #  | y <sup>1+</sup> | y <sup>2+</sup> | y <sup>3+</sup> |
|---------|-----------------|-----------------|-----------------|----|--------|----|-----------------|-----------------|-----------------|
|         | 114.0913        | 57.5493         | 38.7020         | 1  | I      | 24 |                 |                 |                 |
|         | 215.1390        | 108.0731        | 72.3845         | 2  | T      | 23 | 2643.9698       | 1322.4886       | 881.9948        |
|         | 302.1710        | 151.5892        | 101.3952        | 3  | S      | 22 | 2542.9222       | 1271.9647       | 848.3122        |
|         | 430.2296        | 215.6185        | 144.0814        | 4  | Q      | 21 | 2455.8901       | 1228.4487       | 819.3016        |
|         | 487.2511        | 244.1292        | 163.0885        | 5  | G      | 20 | 2327.8315       | 1164.4194       | 776.6154        |
|         | 602.2780        | 301.6427        | 201.4309        | 6  | D      | 19 | 2270.8101       | 1135.9087       | 757.6082        |
|         | 715.3621        | 358.1847        | 239.1256        | 7  | L      | 18 | 2155.7831       | 1078.3952       | 719.2659        |
|         | 844.4047        | 422.7060        | 282.1397        | 8  | E      | 17 | 2042.6991       | 1021.8532       | 681.5712        |
|         | 915.4418        | 458.2245        | 305.8188        | 9  | A      | 16 | 1913.6565       | 957.3319        | 638.5570        |
|         | 1030.4687       | 515.7380        | 344.1611        | 10 | D      | 15 | 1842.6194       | 921.8133        | 614.8780        |
|         | 1087.4902       | 544.2487        | 363.1683        | 11 | G      | 14 | 1727.5924       | 864.2999        | 576.5357        |
|         | 1174.5222       | 587.7648        | 392.1789        | 12 | S      | 13 | 1670.5710       | 835.7891        | 557.5285        |
|         | 1341.5206       | 671.2639        | 447.8450        | 13 | S[167] | 12 | 1583.5390       | 792.2731        | 528.5178        |
|         | 1456.5475       | 728.7774        | 486.1874        | 14 | D      | 11 | 1416.5406       | 708.7739        | 472.8517        |
|         | 1585.5901       | 793.2987        | 529.2016        | 15 | E      | 10 | 1301.5137       | 651.2605        | 434.5094        |
|         | 1714.6327       | 857.8200        | 572.2158        | 16 | E      | 9  | 1172.4711       | 586.7392        | 391.4952        |
|         | 1895.6467       | 948.3270        | 632.5538        | 17 | T[181] | 8  | 1043.4285       | 522.2179        | 348.4810        |
|         | 2024.6893       | 1012.8483       | 675.5680        | 18 | E      | 7  | 862.4145        | 431.7109        | 288.1430        |
|         | 2152.7479       | 1076.8776       | 718.2541        | 19 | Q      | 6  | 733.3719        | 367.1896        | 245.1288        |
|         | 2281.7905       | 1141.3989       | 761.2683        | 20 | E      | 5  | 605.3133        | 303.1603        | 202.4426        |
|         | 2378.8432       | 1189.9253       | 793.6193        | 21 | P      | 4  | 476.2707        | 238.6390        | 159.4284        |
|         | 2515.9021       | 1258.4547       | 839.3056        | 22 | H      | 3  | 379.2179        | 190.1126        | 127.0775        |
|         | 2602.9342       | 1301.9707       | 868.3162        | 23 | S      | 2  | 242.1590        | 121.5832        | 81.3912         |
|         |                 |                 |                 | 24 | K[136] | 1  | 155.1270        | 78.0671         | 52.3805         |



# Annotated spectra from Saleem et. al. 2009

R.IVEDFT<sub>181</sub>PDLEDPR<sub>166</sub>F/2

0.6261

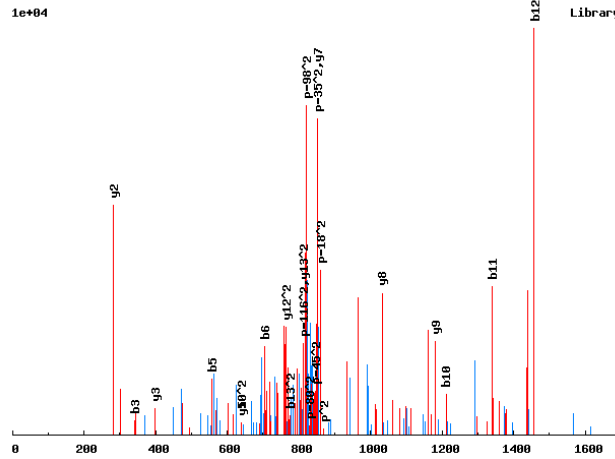

Library

|  | b <sup>1+</sup> | b <sup>2+</sup> | #  | AA     | #  | y <sup>1+</sup> | y <sup>2+</sup> |
|--|-----------------|-----------------|----|--------|----|-----------------|-----------------|
|  | 114.0913        | 57.5493         | 1  | I      | 14 |                 |                 |
|  | 213.1598        | 107.0835        | 2  | V      | 13 | 1623.6813       | 812.3443        |
|  | 342.2023        | 171.6048        | 3  | E      | 12 | 1524.6129       | 762.8101        |
|  | 457.2293        | 229.1183        | 4  | D      | 11 | 1395.5703       | 698.2888        |
|  | 558.2770        | 279.6421        | 5  | T      | 10 | 1280.5434       | 640.7753        |
|  | 705.3454        | 353.1763        | 6  | F      | 9  | 1179.4957       | 590.2515        |
|  | 886.3594        | 443.6833        | 7  | T[181] | 8  | 1032.4273       | 516.7173        |
|  | 983.4121        | 492.2097        | 8  | P      | 7  | 851.4133        | 426.2103        |
|  | 1098.4391       | 549.7232        | 9  | D      | 6  | 754.3605        | 377.6839        |
|  | 1211.5231       | 606.2652        | 10 | L      | 5  | 639.3336        | 320.1704        |
|  | 1340.5657       | 670.7865        | 11 | E      | 4  | 526.2495        | 263.6284        |
|  | 1455.5927       | 728.3000        | 12 | D      | 3  | 397.2069        | 199.1071        |
|  | 1552.6454       | 776.8264        | 13 | P      | 2  | 282.1800        | 141.5936        |
|  |                 |                 | 14 | R[166] | 1  | 185.1272        | 93.0672         |

# Annotated spectra from Saleem et. al. 2009

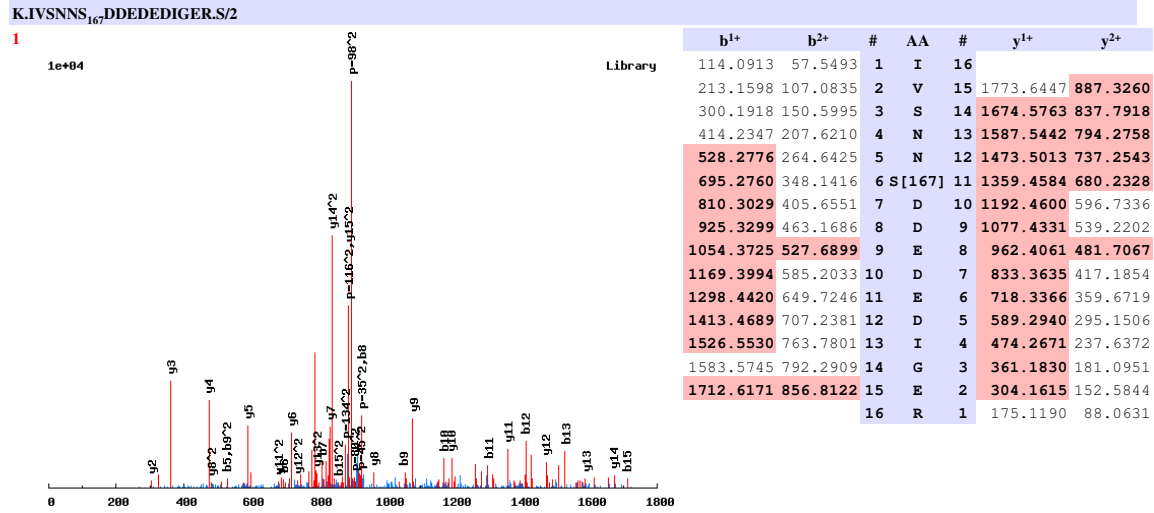

# Annotated spectra from Saleem et. al. 2009

K.IY<sub>243</sub>SSVAT<sub>181</sub>PQALNDELK.N/2

0.9546

1e+04

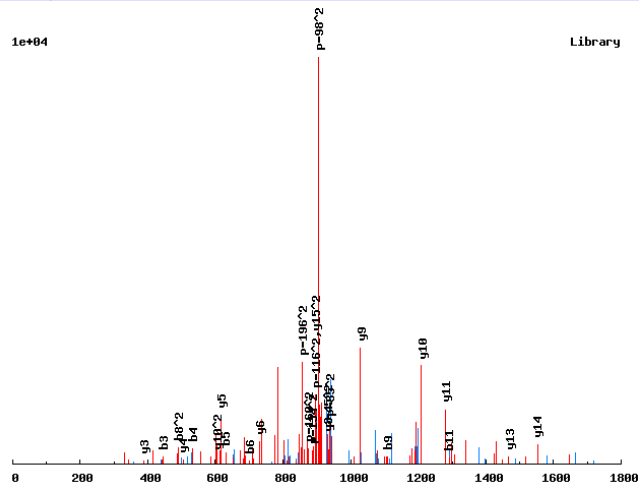

| Library | b <sup>1+</sup> | b <sup>2+</sup> | #  | AA     | #  | y <sup>1+</sup> | y <sup>2+</sup> |
|---------|-----------------|-----------------|----|--------|----|-----------------|-----------------|
|         | 114.0913        | 57.5493         | 1  | I      | 16 |                 |                 |
|         | 357.1210        | 179.0641        | 2  | Y[243] | 15 | 1795.7551       | 898.3812        |
|         | 444.1530        | 222.5802        | 3  | S      | 14 | 1552.7254       | 776.8664        |
|         | 531.1851        | 266.0962        | 4  | S      | 13 | 1465.6934       | 733.3503        |
|         | 630.2535        | 315.6304        | 5  | V      | 12 | 1378.6614       | 689.8343        |
|         | 701.2906        | 351.1489        | 6  | A      | 11 | 1279.5930       | 640.3001        |
|         | 882.3046        | 441.6559        | 7  | T[181] | 10 | 1208.5558       | 604.7816        |
|         | 979.3574        | 490.1823        | 8  | P      | 9  | 1027.5418       | 514.2746        |
|         | 1107.4159       | 554.2116        | 9  | Q      | 8  | 930.4891        | 465.7482        |
|         | 1178.4530       | 589.7302        | 10 | A      | 7  | 802.4305        | 401.7189        |
|         | 1291.5371       | 646.2722        | 11 | L      | 6  | 731.3934        | 366.2003        |
|         | 1405.5800       | 703.2937        | 12 | N      | 5  | 618.3093        | 309.6583        |
|         | 1520.6070       | 760.8071        | 13 | D      | 4  | 504.2664        | 252.6368        |
|         | 1649.6496       | 825.3284        | 14 | E      | 3  | 389.2394        | 195.1234        |
|         | 1762.7336       | 881.8705        | 15 | L      | 2  | 260.1969        | 130.6021        |
|         |                 |                 | 16 | K      | 1  | 147.1128        | 74.0600         |

# Annotated spectra from Saleem et. al. 2009

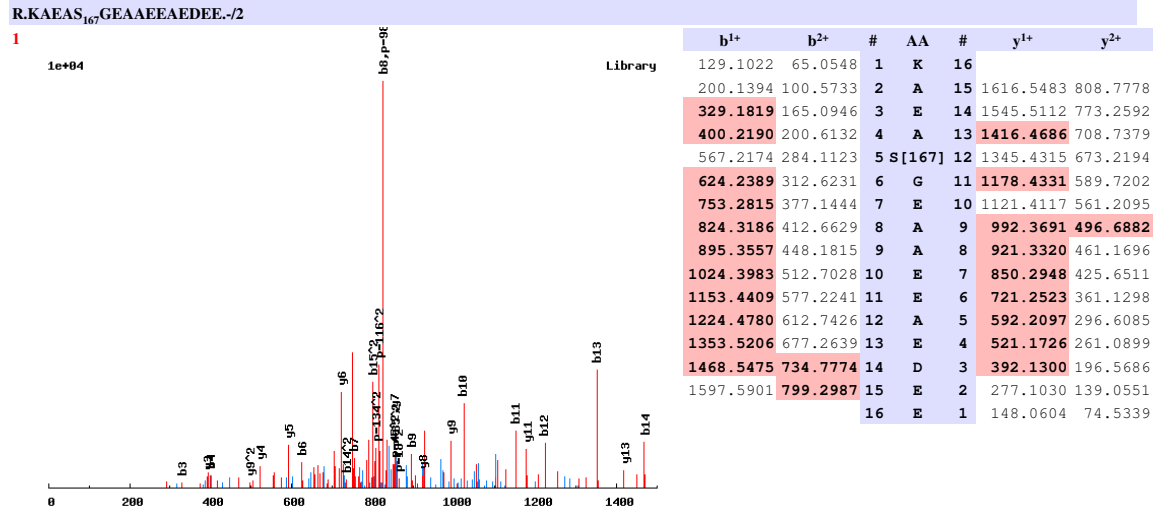

# Annotated spectra from Saleem et. al. 2009

K.KAQEEEEEDVAT<sub>181</sub>DS<sub>167</sub>E.-/2

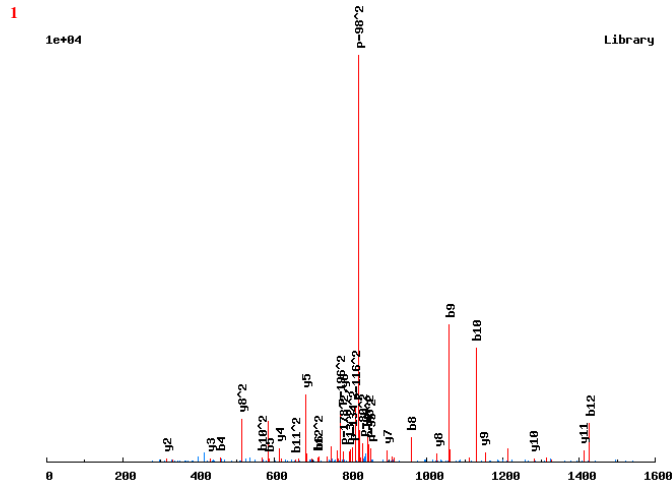

| Library | b <sup>1+</sup> | b <sup>2+</sup> | #  | AA     | #  | y <sup>1+</sup> | y <sup>2+</sup> |
|---------|-----------------|-----------------|----|--------|----|-----------------|-----------------|
|         | 129.1022        | 65.0548         | 1  | K      | 14 |                 |                 |
|         | 200.1394        | 100.5733        | 2  | A      | 13 | 1611.4983       | 806.2528        |
|         | 328.1979        | 164.6026        | 3  | Q      | 12 | 1540.4611       | 770.7342        |
|         | 457.2405        | 229.1239        | 4  | E      | 11 | 1412.4026       | 706.7049        |
|         | 586.2831        | 293.6452        | 5  | E      | 10 | 1283.3600       | 642.1836        |
|         | 715.3257        | 358.1665        | 6  | E      | 9  | 1154.3174       | 577.6623        |
|         | 844.3683        | 422.6878        | 7  | E      | 8  | 1025.2748       | 513.1410        |
|         | 959.3952        | 480.2013        | 8  | D      | 7  | 896.2322        | 448.6197        |
|         | 1058.4636       | 529.7355        | 9  | V      | 6  | 781.2053        | 391.1063        |
|         | 1129.5008       | 565.2540        | 10 | A      | 5  | 682.1369        | 341.5721        |
|         | 1310.5148       | 655.7610        | 11 | T[181] | 4  | 611.0997        | 306.0535        |
|         | 1425.5417       | 713.2745        | 12 | D      | 3  | 430.0857        | 215.5465        |
|         | 1592.5401       | 796.7737        | 13 | S[167] | 2  | 315.0588        | 158.0330        |
|         |                 |                 | 14 | E      | 1  | 148.0604        | 74.5339         |

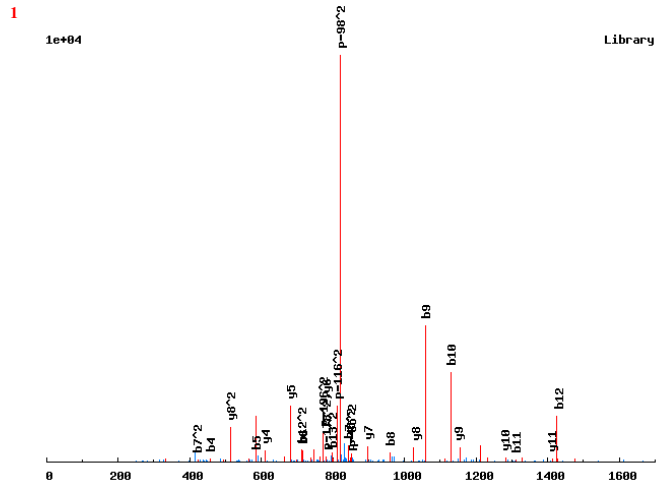

| Library | b <sup>1+</sup> | b <sup>2+</sup> | #  | AA     | #  | y <sup>1+</sup> | y <sup>2+</sup> |
|---------|-----------------|-----------------|----|--------|----|-----------------|-----------------|
|         | 129.1022        | 65.0548         | 1  | K      | 14 |                 |                 |
|         | 200.1394        | 100.5733        | 2  | A      | 13 | 1611.4983       | 806.2528        |
|         | 328.1979        | 164.6026        | 3  | Q      | 12 | 1540.4611       | 770.7342        |
|         | 457.2405        | 229.1239        | 4  | E      | 11 | 1412.4026       | 706.7049        |
|         | 586.2831        | 293.6452        | 5  | E      | 10 | 1283.3600       | 642.1836        |
|         | 715.3257        | 358.1665        | 6  | E      | 9  | 1154.3174       | 577.6623        |
|         | 844.3683        | 422.6878        | 7  | E      | 8  | 1025.2748       | 513.1410        |
|         | 959.3952        | 480.2013        | 8  | D      | 7  | 896.2322        | 448.6197        |
|         | 1058.4636       | 529.7355        | 9  | V      | 6  | 781.2053        | 391.1063        |
|         | 1129.5008       | 565.2540        | 10 | A      | 5  | 682.1369        | 341.5721        |
|         | 1310.5148       | 655.7610        | 11 | T[181] | 4  | 611.0997        | 306.0535        |
|         | 1425.5417       | 713.2745        | 12 | D      | 3  | 430.0857        | 215.5465        |
|         | 1592.5401       | 796.7737        | 13 | S[167] | 2  | 315.0588        | 158.0330        |
|         |                 |                 | 14 | E      | 1  | 148.0604        | 74.5339         |

# Annotated spectra from Saleem et. al. 2009

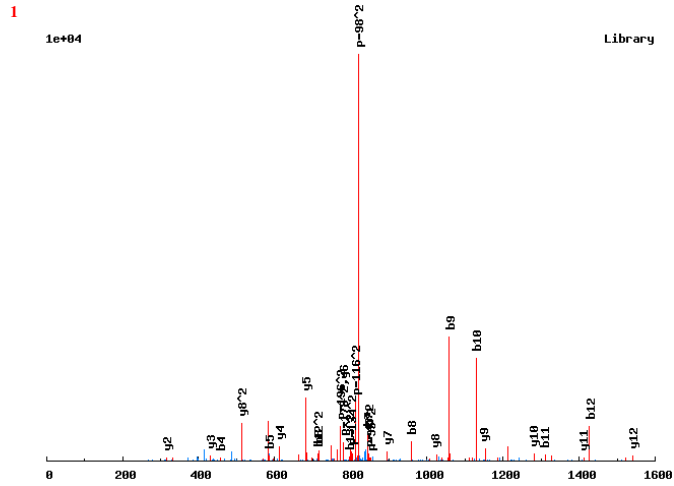

| Library | b <sup>1+</sup> | b <sup>2+</sup> | #  | AA     | #  | y <sup>1+</sup> | y <sup>2+</sup> |
|---------|-----------------|-----------------|----|--------|----|-----------------|-----------------|
|         | 129.1022        | 65.0548         | 1  | K      | 14 |                 |                 |
|         | 200.1394        | 100.5733        | 2  | A      | 13 | 1611.4983       | 806.2528        |
|         | 328.1979        | 164.6026        | 3  | Q      | 12 | 1540.4611       | 770.7342        |
|         | 457.2405        | 229.1239        | 4  | E      | 11 | 1412.4026       | 706.7049        |
|         | 586.2831        | 293.6452        | 5  | E      | 10 | 1283.3600       | 642.1836        |
|         | 715.3257        | 358.1665        | 6  | E      | 9  | 1154.3174       | 577.6623        |
|         | 844.3683        | 422.6878        | 7  | E      | 8  | 1025.2748       | 513.1410        |
|         | 959.3952        | 480.2013        | 8  | D      | 7  | 896.2322        | 448.6197        |
|         | 1058.4636       | 529.7355        | 9  | V      | 6  | 781.2053        | 391.1063        |
|         | 1129.5008       | 565.2540        | 10 | A      | 5  | 682.1369        | 341.5721        |
|         | 1310.5148       | 655.7610        | 11 | T[181] | 4  | 611.0997        | 306.0535        |
|         | 1425.5417       | 713.2745        | 12 | D      | 3  | 430.0857        | 215.5465        |
|         | 1592.5401       | 796.7737        | 13 | S[167] | 2  | 315.0588        | 158.0330        |
|         |                 |                 | 14 | E      | 1  | 148.0604        | 74.5339         |

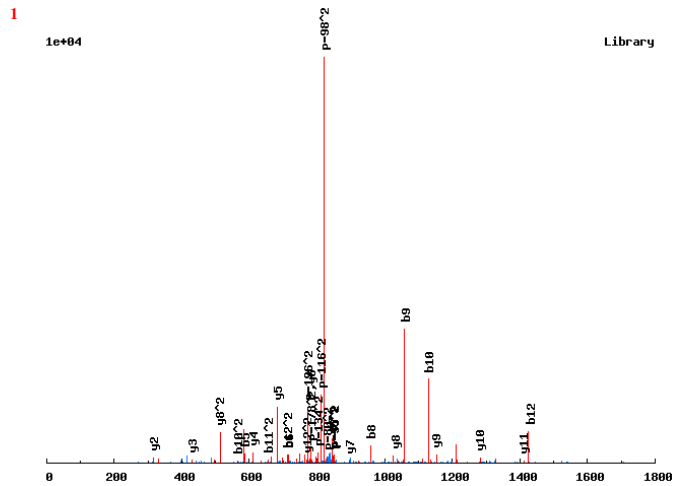

| Library | b <sup>1+</sup> | b <sup>2+</sup> | #  | AA     | #  | y <sup>1+</sup> | y <sup>2+</sup> |
|---------|-----------------|-----------------|----|--------|----|-----------------|-----------------|
|         | 129.1022        | 65.0548         | 1  | K      | 14 |                 |                 |
|         | 200.1394        | 100.5733        | 2  | A      | 13 | 1611.4983       | 806.2528        |
|         | 328.1979        | 164.6026        | 3  | Q      | 12 | 1540.4611       | 770.7342        |
|         | 457.2405        | 229.1239        | 4  | E      | 11 | 1412.4026       | 706.7049        |
|         | 586.2831        | 293.6452        | 5  | E      | 10 | 1283.3600       | 642.1836        |
|         | 715.3257        | 358.1665        | 6  | E      | 9  | 1154.3174       | 577.6623        |
|         | 844.3683        | 422.6878        | 7  | E      | 8  | 1025.2748       | 513.1410        |
|         | 959.3952        | 480.2013        | 8  | D      | 7  | 896.2322        | 448.6197        |
|         | 1058.4636       | 529.7355        | 9  | V      | 6  | 781.2053        | 391.1063        |
|         | 1129.5008       | 565.2540        | 10 | A      | 5  | 682.1369        | 341.5721        |
|         | 1310.5148       | 655.7610        | 11 | T[181] | 4  | 611.0997        | 306.0535        |
|         | 1425.5417       | 713.2745        | 12 | D      | 3  | 430.0857        | 215.5465        |
|         | 1592.5401       | 796.7737        | 13 | S[167] | 2  | 315.0588        | 158.0330        |
|         |                 |                 | 14 | E      | 1  | 148.0604        | 74.5339         |

| Library | b <sup>1+</sup> | b <sup>2+</sup> | #  | AA     | #  | y <sup>1+</sup> | y <sup>2+</sup> |
|---------|-----------------|-----------------|----|--------|----|-----------------|-----------------|
|         | 129.1022        | 65.0548         | 1  | K      | 14 |                 |                 |
|         | 200.1394        | 100.5733        | 2  | A      | 13 | 1611.4983       | 806.2528        |
|         | 328.1979        | 164.6026        | 3  | Q      | 12 | 1540.4611       | 770.7342        |
|         | 457.2405        | 229.1239        | 4  | E      | 11 | 1412.4026       | 706.7049        |
|         | 586.2831        | 293.6452        | 5  | E      | 10 | 1283.3600       | 642.1836        |
|         | 715.3257        | 358.1665        | 6  | E      | 9  | 1154.3174       | 577.6623        |
|         | 844.3683        | 422.6878        | 7  | E      | 8  | 1025.2748       | 513.1410        |
|         | 959.3952        | 480.2013        | 8  | D      | 7  | 896.2322        | 448.6197        |
|         | 1058.4636       | 529.7355        | 9  | V      | 6  | 781.2053        | 391.1063        |
|         | 1129.5008       | 565.2540        | 10 | A      | 5  | 682.1369        | 341.5721        |
|         | 1310.5148       | 655.7610        | 11 | T[181] | 4  | 611.0997        | 306.0535        |

# Annotated spectra from Saleem et. al. 2009

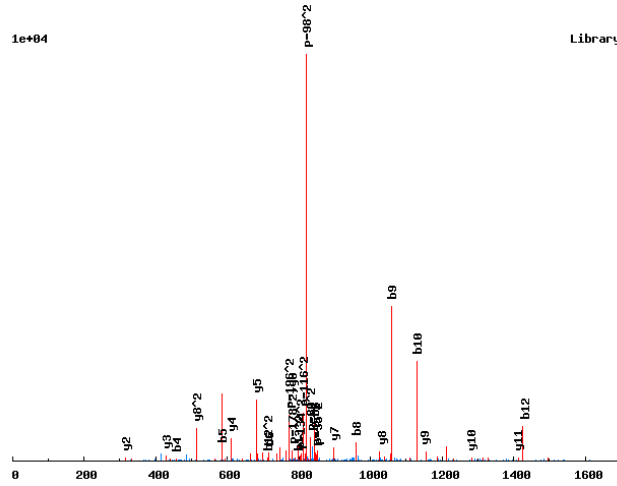

|         |           |          |    |         |   |          |          |
|---------|-----------|----------|----|---------|---|----------|----------|
| Library | 1425.5417 | 713.2745 | 12 | D       | 3 | 430.0857 | 215.5465 |
|         | 1592.5401 | 796.7737 | 13 | S [167] | 2 | 315.0588 | 158.0330 |
|         |           |          | 14 | E       | 1 | 148.0604 | 74.5339  |

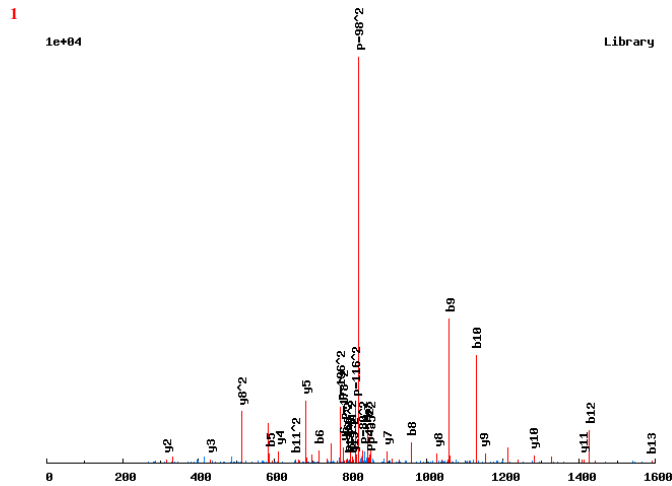

| b <sup>1+</sup> | b <sup>2+</sup> | #  | AA      | #  | y <sup>1+</sup> | y <sup>2+</sup> |
|-----------------|-----------------|----|---------|----|-----------------|-----------------|
| 129.1022        | 65.0548         | 1  | K       | 14 |                 |                 |
| 200.1394        | 100.5733        | 2  | A       | 13 | 1611.4983       | 806.2528        |
| 328.1979        | 164.6026        | 3  | Q       | 12 | 1540.4611       | 770.7342        |
| 457.2405        | 229.1239        | 4  | E       | 11 | 1412.4026       | 706.7049        |
| 586.2831        | 293.6452        | 5  | E       | 10 | 1283.3600       | 642.1836        |
| 715.3257        | 358.1665        | 6  | E       | 9  | 1154.3174       | 577.6623        |
| 844.3683        | 422.6878        | 7  | E       | 8  | 1025.2748       | 513.1410        |
| 959.3952        | 480.2013        | 8  | D       | 7  | 896.2322        | 448.6197        |
| 1058.4636       | 529.7355        | 9  | V       | 6  | 781.2053        | 391.1063        |
| 1129.5008       | 565.2540        | 10 | A       | 5  | 682.1369        | 341.5721        |
| 1310.5148       | 655.7610        | 11 | T [181] | 4  | 611.0997        | 306.0535        |
| 1425.5417       | 713.2745        | 12 | D       | 3  | 430.0857        | 215.5465        |
| 1592.5401       | 796.7737        | 13 | S [167] | 2  | 315.0588        | 158.0330        |
|                 |                 | 14 | E       | 1  | 148.0604        | 74.5339         |

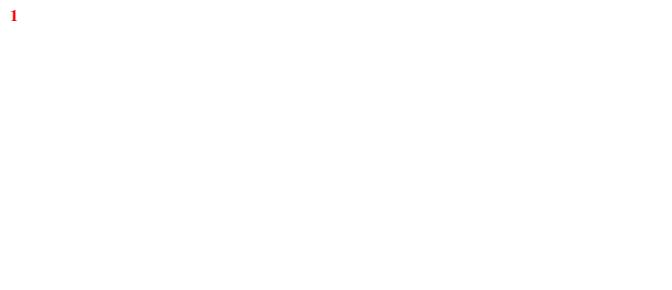

| b <sup>1+</sup> | b <sup>2+</sup> | #  | AA      | #  | y <sup>1+</sup> | y <sup>2+</sup> |
|-----------------|-----------------|----|---------|----|-----------------|-----------------|
| 129.1022        | 65.0548         | 1  | K       | 14 |                 |                 |
| 200.1394        | 100.5733        | 2  | A       | 13 | 1611.4983       | 806.2528        |
| 328.1979        | 164.6026        | 3  | Q       | 12 | 1540.4611       | 770.7342        |
| 457.2405        | 229.1239        | 4  | E       | 11 | 1412.4026       | 706.7049        |
| 586.2831        | 293.6452        | 5  | E       | 10 | 1283.3600       | 642.1836        |
| 715.3257        | 358.1665        | 6  | E       | 9  | 1154.3174       | 577.6623        |
| 844.3683        | 422.6878        | 7  | E       | 8  | 1025.2748       | 513.1410        |
| 959.3952        | 480.2013        | 8  | D       | 7  | 896.2322        | 448.6197        |
| 1058.4636       | 529.7355        | 9  | V       | 6  | 781.2053        | 391.1063        |
| 1129.5008       | 565.2540        | 10 | A       | 5  | 682.1369        | 341.5721        |
| 1310.5148       | 655.7610        | 11 | T [181] | 4  | 611.0997        | 306.0535        |

# Annotated spectra from Saleem et. al. 2009

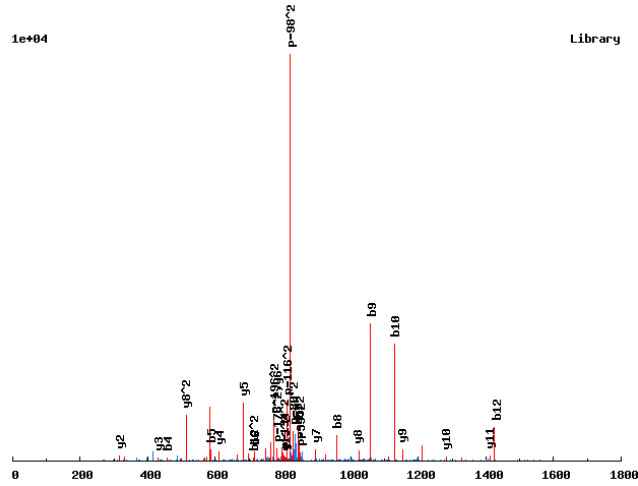

|         |           |          |    |         |   |          |          |
|---------|-----------|----------|----|---------|---|----------|----------|
| Library | 1425.5417 | 713.2745 | 12 | D       | 3 | 430.0857 | 215.5465 |
|         | 1592.5401 | 796.7737 | 13 | S [167] | 2 | 315.0588 | 158.0330 |
|         |           |          | 14 | E       | 1 | 148.0604 | 74.5339  |

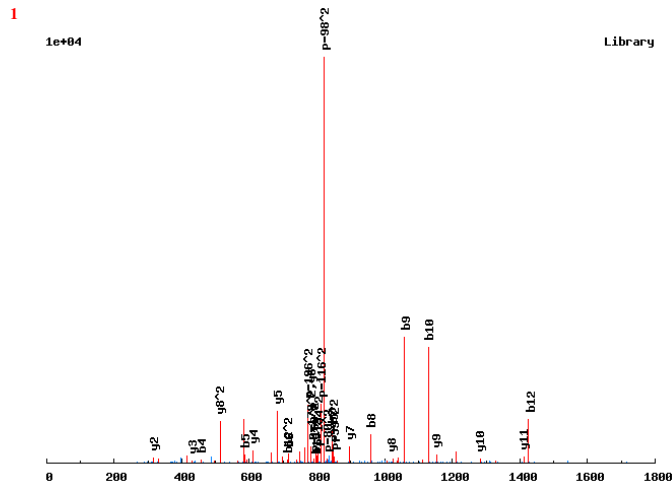

| b <sup>1+</sup> | b <sup>2+</sup> | #  | AA      | #  | y <sup>1+</sup> | y <sup>2+</sup> |
|-----------------|-----------------|----|---------|----|-----------------|-----------------|
| 129.1022        | 65.0548         | 1  | K       | 14 |                 |                 |
| 200.1394        | 100.5733        | 2  | A       | 13 | 1611.4983       | 806.2528        |
| 328.1979        | 164.6026        | 3  | Q       | 12 | 1540.4611       | 770.7342        |
| 457.2405        | 229.1239        | 4  | E       | 11 | 1412.4026       | 706.7049        |
| 586.2831        | 293.6452        | 5  | E       | 10 | 1283.3600       | 642.1836        |
| 715.3257        | 358.1665        | 6  | E       | 9  | 1154.3174       | 577.6623        |
| 844.3683        | 422.6878        | 7  | E       | 8  | 1025.2748       | 513.1410        |
| 959.3952        | 480.2013        | 8  | D       | 7  | 896.2322        | 448.6197        |
| 1058.4636       | 529.7355        | 9  | V       | 6  | 781.2053        | 391.1063        |
| 1129.5008       | 565.2540        | 10 | A       | 5  | 682.1369        | 341.5721        |
| 1310.5148       | 655.7610        | 11 | T [181] | 4  | 611.0997        | 306.0535        |
| 1425.5417       | 713.2745        | 12 | D       | 3  | 430.0857        | 215.5465        |
| 1592.5401       | 796.7737        | 13 | S [167] | 2  | 315.0588        | 158.0330        |
|                 |                 | 14 | E       | 1  | 148.0604        | 74.5339         |



| b <sup>1+</sup> | b <sup>2+</sup> | #  | AA      | #  | y <sup>1+</sup> | y <sup>2+</sup> |
|-----------------|-----------------|----|---------|----|-----------------|-----------------|
| 129.1022        | 65.0548         | 1  | K       | 14 |                 |                 |
| 200.1394        | 100.5733        | 2  | A       | 13 | 1611.4983       | 806.2528        |
| 328.1979        | 164.6026        | 3  | Q       | 12 | 1540.4611       | 770.7342        |
| 457.2405        | 229.1239        | 4  | E       | 11 | 1412.4026       | 706.7049        |
| 586.2831        | 293.6452        | 5  | E       | 10 | 1283.3600       | 642.1836        |
| 715.3257        | 358.1665        | 6  | E       | 9  | 1154.3174       | 577.6623        |
| 844.3683        | 422.6878        | 7  | E       | 8  | 1025.2748       | 513.1410        |
| 959.3952        | 480.2013        | 8  | D       | 7  | 896.2322        | 448.6197        |
| 1058.4636       | 529.7355        | 9  | V       | 6  | 781.2053        | 391.1063        |
| 1129.5008       | 565.2540        | 10 | A       | 5  | 682.1369        | 341.5721        |
| 1310.5148       | 655.7610        | 11 | T [181] | 4  | 611.0997        | 306.0535        |



# Annotated spectra from Saleem et. al. 2009

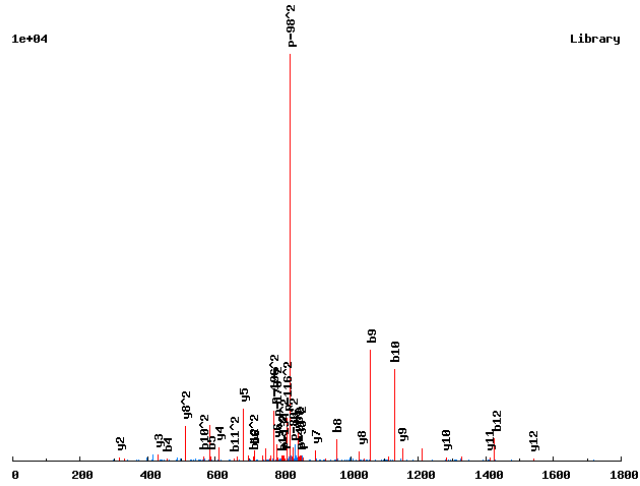

|         |           |          |    |         |   |          |          |
|---------|-----------|----------|----|---------|---|----------|----------|
| Library | 1425.5417 | 713.2745 | 12 | D       | 3 | 430.0857 | 215.5465 |
|         | 1592.5401 | 796.7737 | 13 | S [167] | 2 | 315.0588 | 158.0330 |
|         |           |          | 14 | E       | 1 | 148.0604 | 74.5339  |

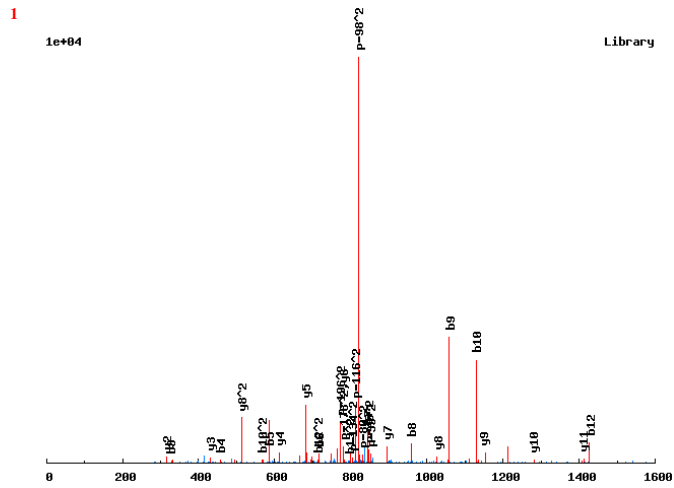

| b <sup>1+</sup> | b <sup>2+</sup> | #  | AA      | #  | y <sup>1+</sup> | y <sup>2+</sup> |
|-----------------|-----------------|----|---------|----|-----------------|-----------------|
| 129.1022        | 65.0548         | 1  | K       | 14 |                 |                 |
| 200.1394        | 100.5733        | 2  | A       | 13 | 1611.4983       | 806.2528        |
| 328.1979        | 164.6026        | 3  | Q       | 12 | 1540.4611       | 770.7342        |
| 457.2405        | 229.1239        | 4  | E       | 11 | 1412.4026       | 706.7049        |
| 586.2831        | 293.6452        | 5  | E       | 10 | 1283.3600       | 642.1836        |
| 715.3257        | 358.1665        | 6  | E       | 9  | 1154.3174       | 577.6623        |
| 844.3683        | 422.6878        | 7  | E       | 8  | 1025.2748       | 513.1410        |
| 959.3952        | 480.2013        | 8  | D       | 7  | 896.2322        | 448.6197        |
| 1058.4636       | 529.7355        | 9  | V       | 6  | 781.2053        | 391.1063        |
| 1129.5008       | 565.2540        | 10 | A       | 5  | 682.1369        | 341.5721        |
| 1310.5148       | 655.7610        | 11 | T [181] | 4  | 611.0997        | 306.0535        |
| 1425.5417       | 713.2745        | 12 | D       | 3  | 430.0857        | 215.5465        |
| 1592.5401       | 796.7737        | 13 | S [167] | 2  | 315.0588        | 158.0330        |
|                 |                 | 14 | E       | 1  | 148.0604        | 74.5339         |

# Annotated spectra from Saleem et. al. 2009

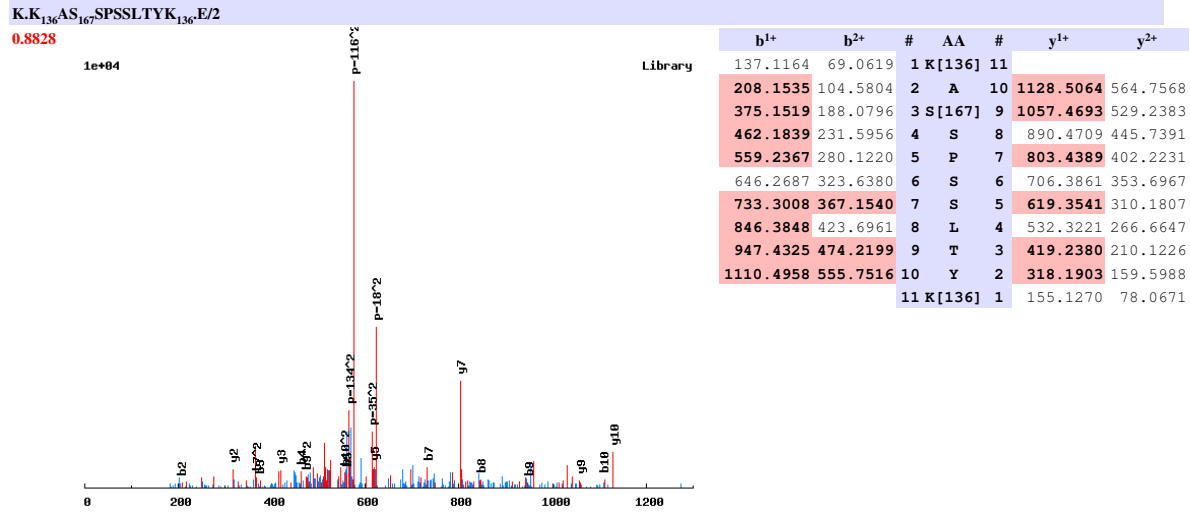

# Annotated spectra from Saleem et. al. 2009

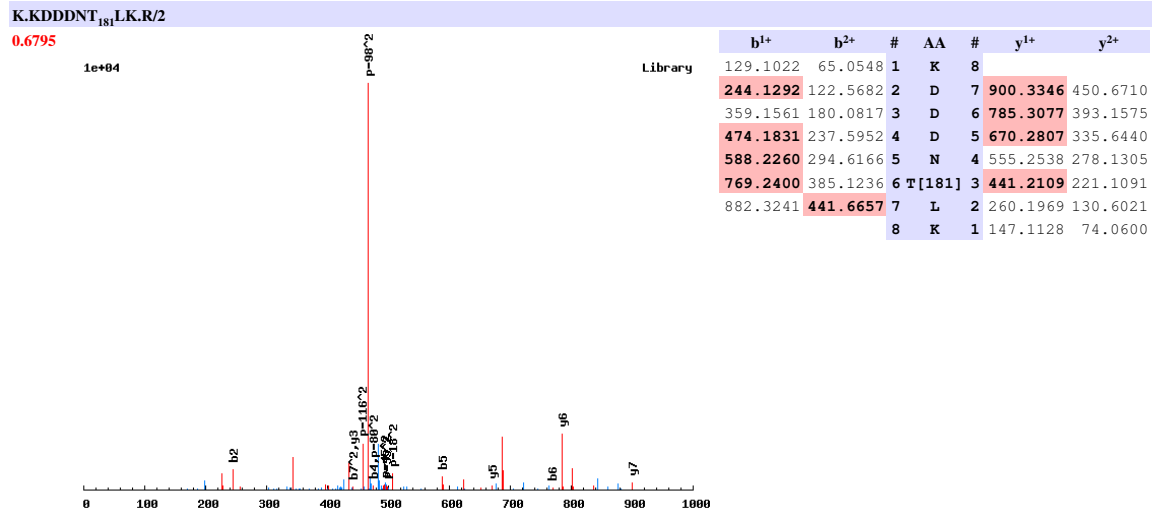

# Annotated spectra from Saleem et. al. 2009

K.KDS<sub>167</sub>-NLS<sub>167</sub>-SPARDILPLPK.T/3

0.8516

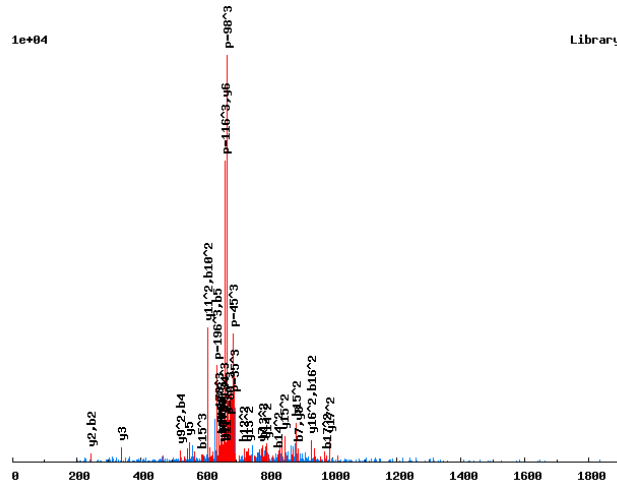

| Library | b <sup>1+</sup> | b <sup>2+</sup> | b <sup>3+</sup> | #  | AA      | #  | y <sup>1+</sup> | y <sup>2+</sup> | y <sup>3+</sup> |
|---------|-----------------|-----------------|-----------------|----|---------|----|-----------------|-----------------|-----------------|
|         | 129.1022        | 65.0548         | 43.7056         | 1  | K       | 18 |                 |                 |                 |
|         | 244.1292        | 122.5682        | 82.0479         | 2  | D       | 17 | 1979.9239       | 990.4656        | 660.6461        |
|         | 411.1275        | 206.0674        | 137.7140        | 3  | S [167] | 16 | 1864.8969       | 932.9521        | 622.3038        |
|         | 525.1705        | 263.0889        | 175.7283        | 4  | N       | 15 | 1697.8986       | 849.4529        | 566.6377        |
|         | 638.2545        | 319.6309        | 213.4230        | 5  | L       | 14 | 1583.8556       | 792.4315        | 528.6234        |
|         | 805.2529        | 403.1301        | 269.0892        | 6  | S [167] | 13 | 1470.7716       | 735.8894        | 490.9287        |
|         | 892.2849        | 446.6461        | 298.0998        | 7  | S       | 12 | 1303.7732       | 652.3902        | 435.2626        |
|         | 989.3377        | 495.1725        | 330.4507        | 8  | P       | 11 | 1216.7412       | 608.8742        | 406.2519        |
|         | 1060.3748       | 530.6910        | 354.1298        | 9  | A       | 10 | 1119.6884       | 560.3479        | 373.9010        |
|         | 1216.4759       | 608.7416        | 406.1635        | 10 | R       | 9  | 1048.6513       | 524.8293        | 350.2220        |
|         | 1331.5028       | 666.2551        | 444.5058        | 11 | D       | 8  | 892.5502        | 446.7787        | 298.1883        |
|         | 1444.5869       | 722.7971        | 482.2005        | 12 | I       | 7  | 777.5233        | 389.2653        | 259.8459        |
|         | 1557.6710       | 779.3391        | 519.8952        | 13 | L       | 6  | 664.4392        | 332.7232        | 222.1513        |
|         | 1654.7237       | 827.8655        | 552.2461        | 14 | P       | 5  | 551.3551        | 276.1812        | 184.4566        |
|         | 1767.8078       | 884.4075        | 589.9408        | 15 | L       | 4  | 454.3024        | 227.6548        | 152.1056        |
|         | 1864.8605       | 932.9339        | 622.2917        | 16 | P       | 3  | 341.2183        | 171.1128        | 114.4110        |
|         | 1961.9133       | 981.4603        | 654.6426        | 17 | P       | 2  | 244.1656        | 122.5864        | 82.0600         |
|         |                 |                 |                 | 18 | K       | 1  | 147.1128        | 74.0600         | 49.7091         |

# Annotated spectra from Saleem et. al. 2009

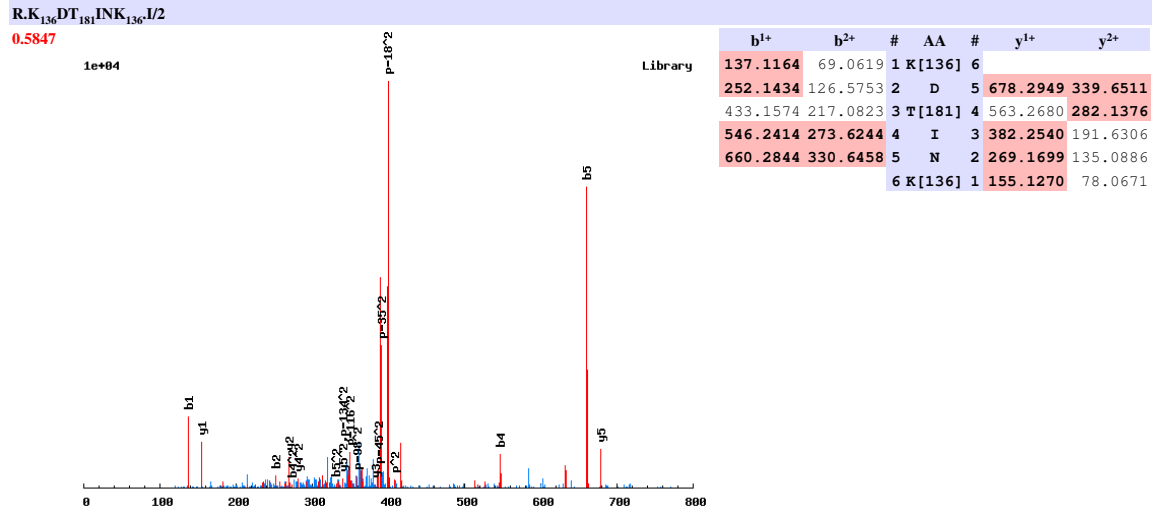

Annotated spectra from Saleem et. al. 2009

R.K<sub>136</sub>EFDEDEDGYDS<sub>167</sub>NEHHQK<sub>136</sub>T/4

0.9086

1e+04

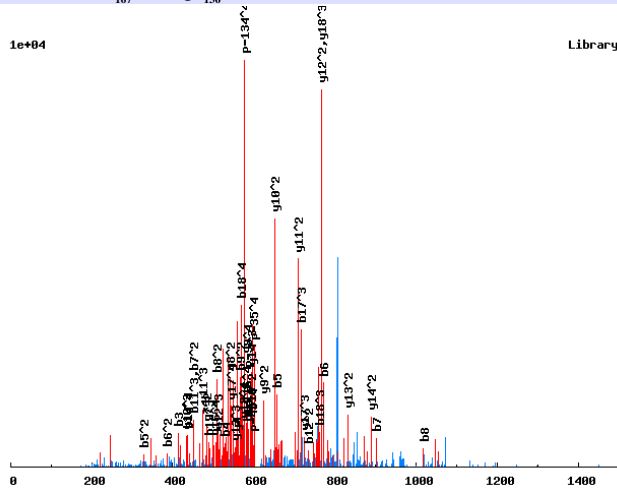

Library

|  | b <sup>1+</sup> | b <sup>2+</sup> | b <sup>3+</sup> | b <sup>4+</sup> | #  | AA     | #  | y <sup>1+</sup> | y <sup>2+</sup> | y <sup>3+</sup> | y <sup>4+</sup> |
|--|-----------------|-----------------|-----------------|-----------------|----|--------|----|-----------------|-----------------|-----------------|-----------------|
|  | 137.1164        | 69.0619         | 46.3770         | 35.0346         | 1  | K[136] | 19 |                 |                 |                 |                 |
|  | 266.1590        | 133.5832        | 89.3912         | 67.2952         | 2  | E      | 18 | 2296.8030       | 1148.9051       | 766.2725        | 574.9562        |
|  | 413.2274        | 207.1174        | 138.4140        | 104.0623        | 3  | F      | 17 | 2167.7604       | 1084.3838       | 723.2583        | 542.6955        |
|  | 528.2544        | 264.6308        | 176.7563        | 132.8191        | 4  | D      | 16 | 2020.6920       | 1010.8496       | 674.2355        | 505.9284        |
|  | 657.2970        | 329.1521        | 219.7705        | 165.0797        | 5  | E      | 15 | 1905.6650       | 953.3361        | 635.8932        | 477.1717        |
|  | 772.3239        | 386.6656        | 258.1128        | 193.8364        | 6  | D      | 14 | 1776.6224       | 888.8148        | 592.8790        | 444.9111        |
|  | 901.3665        | 451.1869        | 301.1270        | 226.0971        | 7  | E      | 13 | 1661.5955       | 831.3014        | 554.5367        | 416.1543        |
|  | 1016.3934       | 508.7004        | 339.4693        | 254.8538        | 8  | D      | 12 | 1532.5529       | 766.7801        | 511.5225        | 383.8937        |
|  | 1131.4204       | 566.2138        | 377.8116        | 283.6106        | 9  | D      | 11 | 1417.5259       | 709.2666        | 473.1802        | 355.1369        |
|  | 1188.4418       | 594.7246        | 396.8188        | 297.8659        | 10 | G      | 10 | 1302.4990       | 651.7531        | 434.8379        | 326.3802        |
|  | 1351.5052       | 676.2562        | 451.1732        | 338.6318        | 11 | Y      | 9  | 1245.4775       | 623.2424        | 415.8307        | 312.1248        |
|  | 1466.5321       | 733.7697        | 489.5156        | 367.3885        | 12 | D      | 8  | 1082.4142       | 541.7107        | 361.4763        | 271.3590        |
|  | 1633.5305       | 817.2689        | 545.1817        | 409.1381        | 13 | S[167] | 7  | 967.3873        | 484.1973        | 323.1339        | 242.6023        |
|  | 1747.5734       | 874.2903        | 583.1960        | 437.6488        | 14 | N      | 6  | 800.3889        | 400.6981        | 267.4678        | 200.8527        |
|  | 1876.6160       | 938.8116        | 626.2102        | 469.9095        | 15 | E      | 5  | 686.3460        | 343.6766        | 229.4535        | 172.3420        |
|  | 2013.6749       | 1007.3411       | 671.8965        | 504.1742        | 16 | H      | 4  | 557.3034        | 279.1553        | 186.4393        | 140.0813        |
|  | 2150.7338       | 1075.8705       | 717.5828        | 538.4389        | 17 | H      | 3  | 420.2445        | 210.6259        | 140.7530        | 105.8166        |
|  | 2278.7924       | 1139.8998       | 760.2690        | 570.4536        | 18 | Q      | 2  | 283.1856        | 142.0964        | 95.0667         | 71.5519         |
|  |                 |                 |                 |                 | 19 | K[136] | 1  | 155.1270        | 78.0671         | 52.3805         | 39.5372         |

# Annotated spectra from Saleem et. al. 2009

K.KELGDAYVS<sub>167</sub>S<sub>167</sub>DEF.-/2

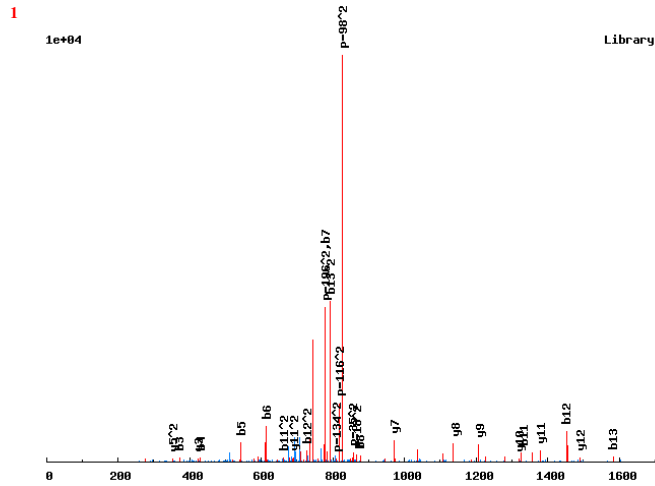

| Library | b <sup>1+</sup> | b <sup>2+</sup> | #  | AA     | #  | y <sup>1+</sup> | y <sup>2+</sup> |
|---------|-----------------|-----------------|----|--------|----|-----------------|-----------------|
|         | 129.1022        | 65.0548         | 1  | K      | 14 |                 |                 |
|         | 258.1448        | 129.5761        | 2  | E      | 13 | 1620.5390       | 810.7731        |
|         | 371.2289        | 186.1181        | 3  | L      | 12 | 1491.4964       | 746.2518        |
|         | 428.2503        | 214.6288        | 4  | G      | 11 | 1378.4123       | 689.7098        |
|         | 543.2773        | 272.1423        | 5  | D      | 10 | 1321.3909       | 661.1991        |
|         | 614.3144        | 307.6608        | 6  | A      | 9  | 1206.3639       | 603.6856        |
|         | 777.3777        | 389.1925        | 7  | Y      | 8  | 1135.3268       | 568.1671        |
|         | 876.4461        | 438.7267        | 8  | V      | 7  | 972.2635        | 486.6354        |
|         | 1043.4445       | 522.2259        | 9  | S[167] | 6  | 873.1951        | 437.1012        |
|         | 1210.4429       | 605.7251        | 10 | S[167] | 5  | 706.1967        | 353.6020        |
|         | 1325.4698       | 663.2385        | 11 | D      | 4  | 539.1984        | 270.1028        |
|         | 1454.5124       | 727.7598        | 12 | E      | 3  | 424.1714        | 212.5894        |
|         | 1583.5550       | 792.2811        | 13 | E      | 2  | 295.1288        | 148.0681        |
|         |                 |                 | 14 | F      | 1  | 166.0863        | 83.5468         |

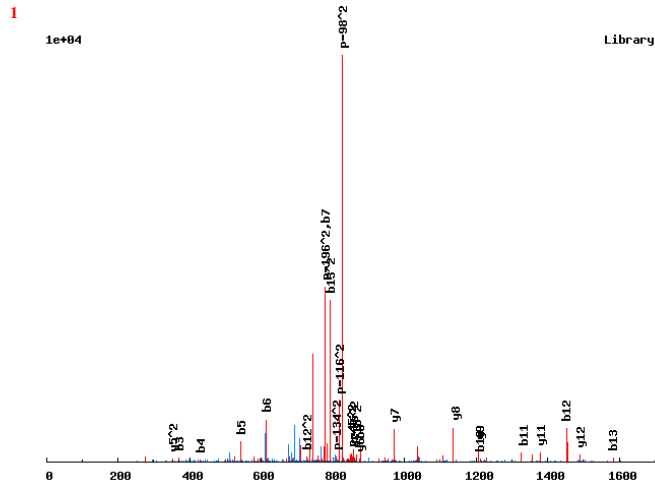

| Library | b <sup>1+</sup> | b <sup>2+</sup> | #  | AA     | #  | y <sup>1+</sup> | y <sup>2+</sup> |
|---------|-----------------|-----------------|----|--------|----|-----------------|-----------------|
|         | 129.1022        | 65.0548         | 1  | K      | 14 |                 |                 |
|         | 258.1448        | 129.5761        | 2  | E      | 13 | 1620.5390       | 810.7731        |
|         | 371.2289        | 186.1181        | 3  | L      | 12 | 1491.4964       | 746.2518        |
|         | 428.2503        | 214.6288        | 4  | G      | 11 | 1378.4123       | 689.7098        |
|         | 543.2773        | 272.1423        | 5  | D      | 10 | 1321.3909       | 661.1991        |
|         | 614.3144        | 307.6608        | 6  | A      | 9  | 1206.3639       | 603.6856        |
|         | 777.3777        | 389.1925        | 7  | Y      | 8  | 1135.3268       | 568.1671        |
|         | 876.4461        | 438.7267        | 8  | V      | 7  | 972.2635        | 486.6354        |
|         | 1043.4445       | 522.2259        | 9  | S[167] | 6  | 873.1951        | 437.1012        |
|         | 1210.4429       | 605.7251        | 10 | S[167] | 5  | 706.1967        | 353.6020        |
|         | 1325.4698       | 663.2385        | 11 | D      | 4  | 539.1984        | 270.1028        |
|         | 1454.5124       | 727.7598        | 12 | E      | 3  | 424.1714        | 212.5894        |
|         | 1583.5550       | 792.2811        | 13 | E      | 2  | 295.1288        | 148.0681        |
|         |                 |                 | 14 | F      | 1  | 166.0863        | 83.5468         |

# Annotated spectra from Saleem et. al. 2009

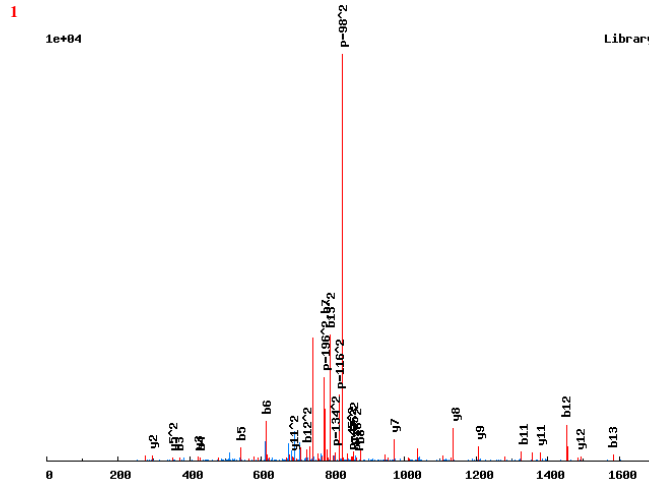

| Library | b <sup>1+</sup> | b <sup>2+</sup> | #  | AA     | #  | y <sup>1+</sup> | y <sup>2+</sup> |
|---------|-----------------|-----------------|----|--------|----|-----------------|-----------------|
|         | 129.1022        | 65.0548         | 1  | K      | 14 |                 |                 |
|         | 258.1448        | 129.5761        | 2  | E      | 13 | 1620.5390       | 810.7731        |
|         | 371.2289        | 186.1181        | 3  | L      | 12 | 1491.4964       | 746.2518        |
|         | 428.2503        | 214.6288        | 4  | G      | 11 | 1378.4123       | 689.7098        |
|         | 543.2773        | 272.1423        | 5  | D      | 10 | 1321.3909       | 661.1991        |
|         | 614.3144        | 307.6608        | 6  | A      | 9  | 1206.3639       | 603.6856        |
|         | 777.3777        | 389.1925        | 7  | Y      | 8  | 1135.3268       | 568.1671        |
|         | 876.4461        | 438.7267        | 8  | V      | 7  | 972.2635        | 486.6354        |
|         | 1043.4445       | 522.2259        | 9  | S[167] | 6  | 873.1951        | 437.1012        |
|         | 1210.4429       | 605.7251        | 10 | S[167] | 5  | 706.1967        | 353.6020        |
|         | 1325.4698       | 663.2385        | 11 | D      | 4  | 539.1984        | 270.1028        |
|         | 1454.5124       | 727.7598        | 12 | E      | 3  | 424.1714        | 212.5894        |
|         | 1583.5550       | 792.2811        | 13 | E      | 2  | 295.1288        | 148.0681        |
|         |                 |                 | 14 | F      | 1  | 166.0863        | 83.5468         |



# Annotated spectra from Saleem et. al. 2009

K.KEPVKTPS<sub>167</sub>PAPAAK.I/3

0.9235

1e+04

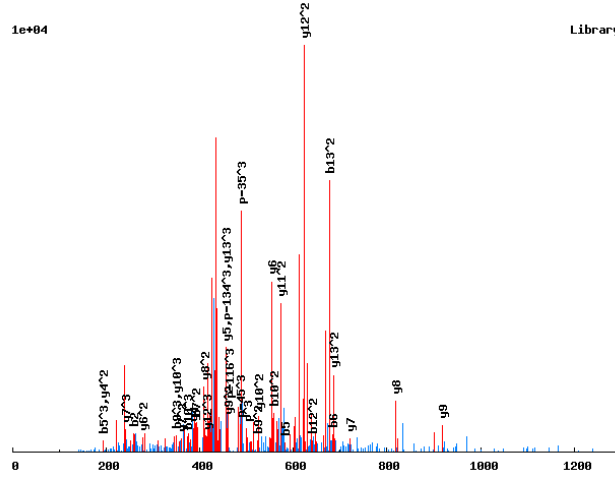

| Library | b <sup>1+</sup> | b <sup>2+</sup> | b <sup>3+</sup> | #  | AA     | #  | y <sup>1+</sup> | y <sup>2+</sup> | y <sup>3+</sup> |
|---------|-----------------|-----------------|-----------------|----|--------|----|-----------------|-----------------|-----------------|
|         | 129.1022        | 65.0548         | 43.7056         | 1  | K      | 14 |                 |                 |                 |
|         | <b>258.1448</b> | 129.5761        | 86.7198         | 2  | E      | 13 | 1372.6872       | <b>686.8472</b> | <b>458.2339</b> |
|         | 355.1976        | 178.1024        | 119.0707        | 3  | P      | 12 | 1243.6446       | <b>622.3259</b> | <b>415.2197</b> |
|         | 454.2660        | 227.6366        | 152.0935        | 4  | V      | 11 | 1146.5918       | <b>573.7996</b> | 382.8688        |
|         | <b>582.3610</b> | 291.6841        | <b>194.7918</b> | 5  | K      | 10 | 1047.5234       | <b>524.2653</b> | <b>349.8460</b> |
|         | <b>683.4086</b> | 342.2080        | 228.4744        | 6  | T      | 9  | <b>919.4285</b> | <b>460.2179</b> | 307.1477        |
|         | 780.4614        | <b>390.7343</b> | 260.8253        | 7  | P      | 8  | <b>818.3808</b> | <b>409.6940</b> | 273.4651        |
|         | 947.4598        | 474.2335        | 316.4914        | 8  | S[167] | 7  | <b>721.3280</b> | <b>361.1676</b> | <b>241.1142</b> |
|         | 1044.5125       | <b>522.7599</b> | <b>348.8424</b> | 9  | P      | 6  | <b>554.3297</b> | <b>277.6685</b> | 185.4481        |
|         | 1115.5496       | <b>558.2785</b> | <b>372.5214</b> | 10 | A      | 5  | <b>457.2769</b> | 229.1421        | 153.0971        |
|         | 1212.6024       | 606.8048        | 404.8723        | 11 | P      | 4  | <b>386.2398</b> | <b>193.6235</b> | 129.4181        |
|         | 1283.6395       | <b>642.3234</b> | 428.5514        | 12 | A      | 3  | 289.1870        | 145.0971        | 97.0672         |
|         | 1354.6766       | <b>677.8419</b> | 452.2304        | 13 | A      | 2  | 218.1499        | 109.5786        | 73.3882         |
|         |                 |                 |                 | 14 | K      | 1  | 147.1128        | 74.0600         | 49.7091         |

# Annotated spectra from Saleem et. al. 2009

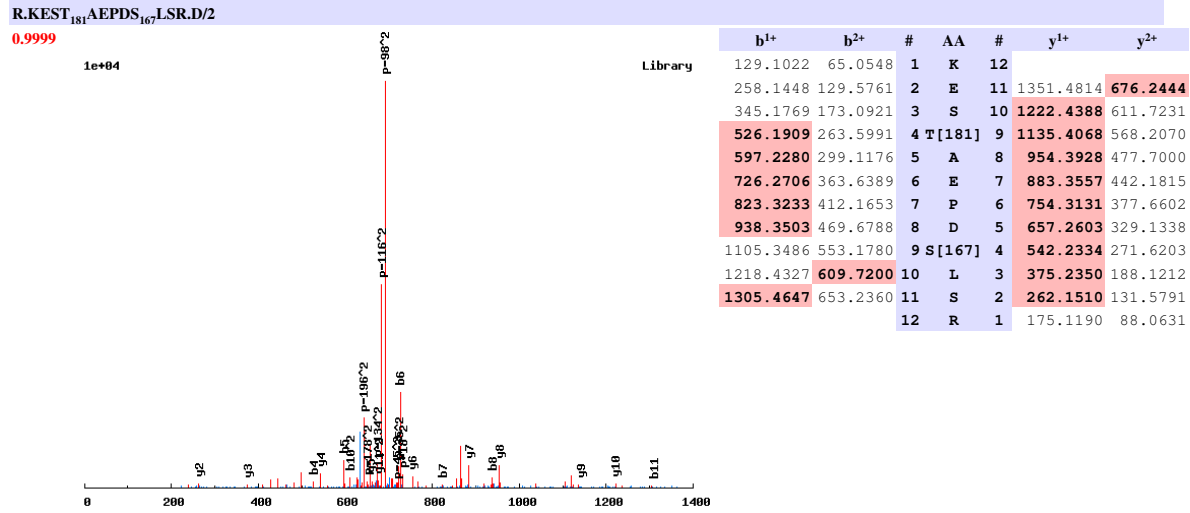

# Annotated spectra from Saleem et. al. 2009

R.KES<sub>167</sub>VPFLR.N/2

0.7355

1e+04

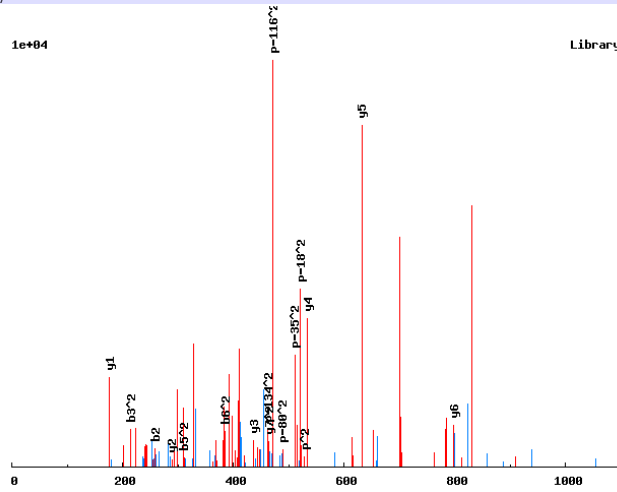

| Library | b <sup>1+</sup> | b <sup>2+</sup> | # | AA     | # | y <sup>1+</sup> | y <sup>2+</sup> |
|---------|-----------------|-----------------|---|--------|---|-----------------|-----------------|
|         | 129.1022        | 65.0548         | 1 | K      | 8 |                 |                 |
|         | <b>258.1448</b> | 129.5761        | 2 | E      | 7 | 927.4335        | <b>464.2204</b> |
|         | 425.1432        | <b>213.0752</b> | 3 | S[167] | 6 | <b>798.3910</b> | 399.6991        |
|         | 524.2116        | 262.6094        | 4 | V      | 5 | <b>631.3926</b> | 316.1999        |
|         | 621.2644        | <b>311.1358</b> | 5 | P      | 4 | <b>532.3242</b> | 266.6657        |
|         | 768.3328        | <b>384.6700</b> | 6 | F      | 3 | <b>435.2714</b> | 218.1393        |
|         | 881.4168        | 441.2121        | 7 | L      | 2 | <b>288.2030</b> | 144.6051        |
|         |                 |                 | 8 | R      | 1 | <b>175.1190</b> | 88.0631         |

# Annotated spectra from Saleem et. al. 2009

K.KETS<sub>167</sub>PDSISIRS/2

0.98

1e+04

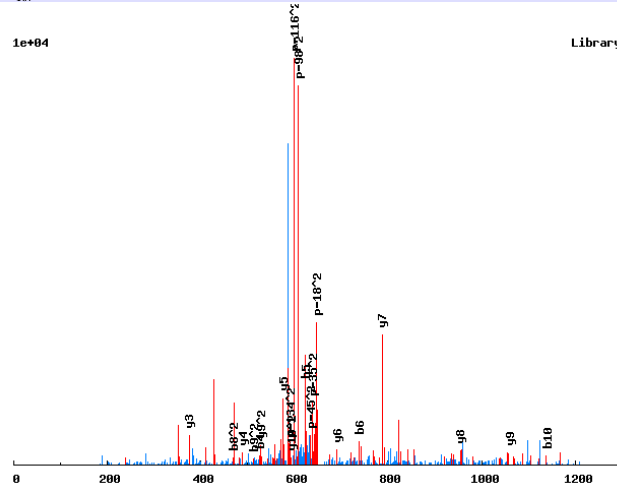

| Library | b <sup>1+</sup> | b <sup>2+</sup> | #  | AA     | #  | y <sup>1+</sup> | y <sup>2+</sup> |
|---------|-----------------|-----------------|----|--------|----|-----------------|-----------------|
|         | 129.1022        | 65.0548         | 1  | K      | 11 |                 |                 |
|         | 258.1448        | 129.5761        | 2  | E      | 10 | 1184.5195       | 592.7634        |
|         | 359.1925        | 180.0999        | 3  | T      | 9  | 1055.4769       | 528.2421        |
|         | 526.1909        | 263.5991        | 4  | S[167] | 8  | 954.4292        | 477.7182        |
|         | 623.2436        | 312.1255        | 5  | P      | 7  | 787.4308        | 394.2191        |
|         | 738.2706        | 369.6389        | 6  | D      | 6  | 690.3781        | 345.6927        |
|         | 825.3026        | 413.1549        | 7  | S      | 5  | 575.3511        | 288.1792        |
|         | 938.3867        | 469.6970        | 8  | I      | 4  | 488.3191        | 244.6632        |
|         | 1025.4187       | 513.2130        | 9  | S      | 3  | 375.2350        | 188.1212        |
|         | 1138.5028       | 569.7550        | 10 | I      | 2  | 288.2030        | 144.6051        |
|         |                 |                 | 11 | R      | 1  | 175.1190        | 88.0631         |

# Annotated spectra from Saleem et. al. 2009

K.KETS<sub>167</sub>PDSIS<sub>167</sub>IR.S/2

0.9979

1e+04

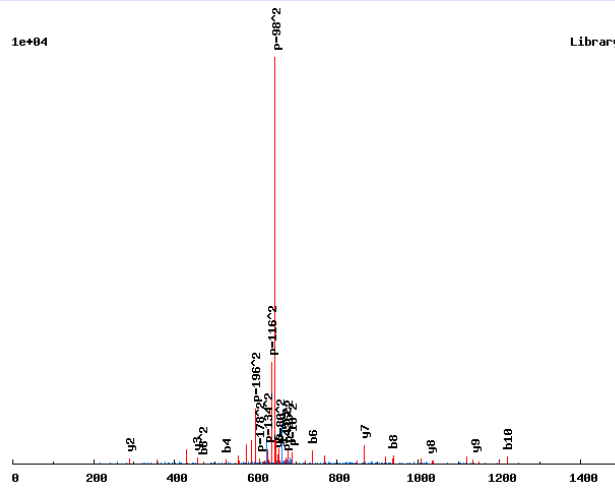

| Library | b <sup>1+</sup> | b <sup>2+</sup> | #  | AA     | #  | y <sup>1+</sup> | y <sup>2+</sup> |
|---------|-----------------|-----------------|----|--------|----|-----------------|-----------------|
|         | 129.1022        | 65.0548         | 1  | K      | 11 |                 |                 |
|         | 258.1448        | 129.5761        | 2  | E      | 10 | 1264.4858       | 632.7465        |
|         | 359.1925        | 180.0999        | 3  | T      | 9  | 1135.4432       | 568.2252        |
|         | 526.1909        | 263.5991        | 4  | S[167] | 8  | 1034.3955       | 517.7014        |
|         | 623.2436        | 312.1255        | 5  | P      | 7  | 867.3972        | 434.2022        |
|         | 738.2706        | 369.6389        | 6  | D      | 6  | 770.3444        | 385.6758        |
|         | 825.3026        | 413.1549        | 7  | S      | 5  | 655.3175        | 328.1624        |
|         | 938.3867        | 469.6970        | 8  | I      | 4  | 568.2854        | 284.6464        |
|         | 1105.3850       | 553.1962        | 9  | S[167] | 3  | 455.2014        | 228.1043        |
|         | 1218.4691       | 609.7382        | 10 | I      | 2  | 288.2030        | 144.6051        |
|         |                 |                 | 11 | R      | 1  | 175.1190        | 88.0631         |

# Annotated spectra from Saleem et. al. 2009

K.KFSSLS<sub>167</sub>PELR.N/2

0.9976

1e+04

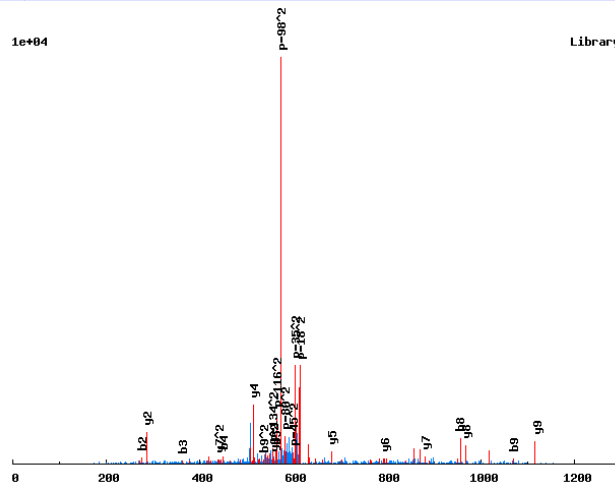

| Library | b <sup>1+</sup> | b <sup>2+</sup> | #  | AA     | #  | y <sup>1+</sup> | y <sup>2+</sup> |
|---------|-----------------|-----------------|----|--------|----|-----------------|-----------------|
|         | 129.1022        | 65.0548         | 1  | K      | 10 |                 |                 |
|         | 276.1706        | 138.5890        | 2  | F      | 9  | 1115.5133       | 558.2603        |
|         | 363.2027        | 182.1050        | 3  | S      | 8  | 968.4448        | 484.7261        |
|         | 450.2347        | 225.6210        | 4  | S      | 7  | 881.4128        | 441.2100        |
|         | 563.3188        | 282.1630        | 5  | L      | 6  | 794.3808        | 397.6940        |
|         | 730.3171        | 365.6622        | 6  | S[167] | 5  | 681.2967        | 341.1520        |
|         | 827.3699        | 414.1886        | 7  | P      | 4  | 514.2984        | 257.6528        |
|         | 956.4125        | 478.7099        | 8  | E      | 3  | 417.2456        | 209.1264        |
|         | 1069.4965       | 535.2519        | 9  | L      | 2  | 288.2030        | 144.6051        |
|         |                 |                 | 10 | R      | 1  | 175.1190        | 88.0631         |

# Annotated spectra from Saleem et. al. 2009

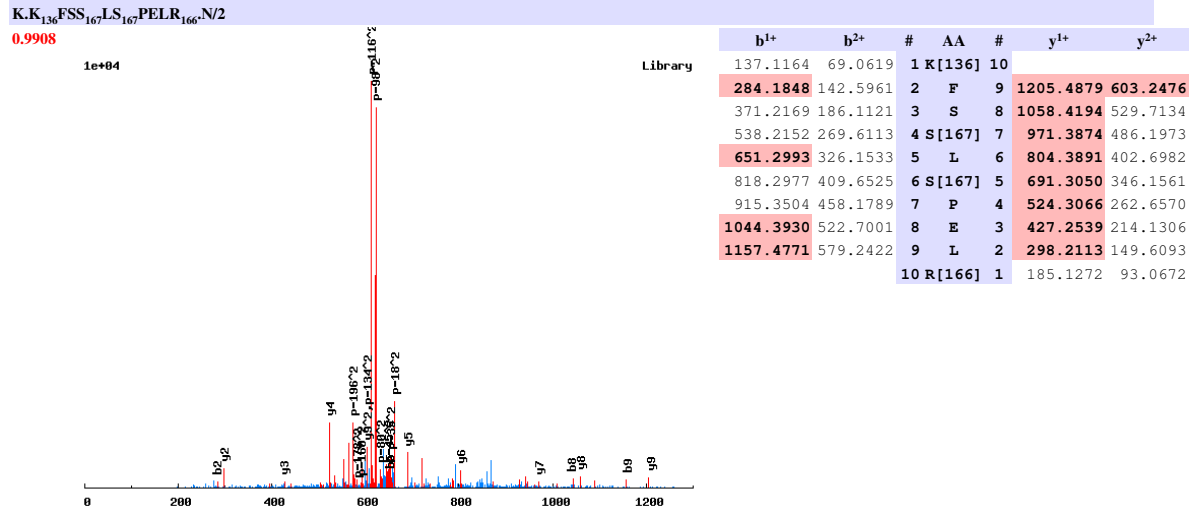

# Annotated spectra from Saleem et. al. 2009

K.KFVLGS<sub>167</sub>AS<sub>167</sub>S<sub>167</sub>K.S/3

0.6142

1e+04

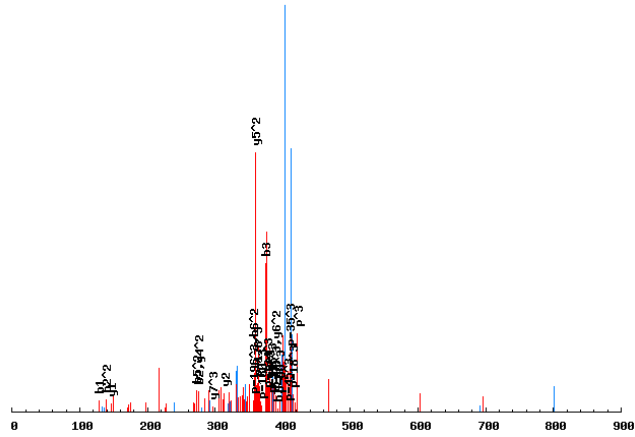

| Library | b <sup>1+</sup> | b <sup>2+</sup> | b <sup>3+</sup> | #  | AA     | #  | y <sup>1+</sup> | y <sup>2+</sup> | y <sup>3+</sup> |
|---------|-----------------|-----------------|-----------------|----|--------|----|-----------------|-----------------|-----------------|
|         | 129.1022        | 65.0548         | 43.7056         | 1  | K      | 10 |                 |                 |                 |
|         | 276.1706        | 138.5890        | 92.7284         | 2  | F      | 9  | 1135.3873       | 568.1973        | 379.1340        |
|         | 375.2391        | 188.1232        | 125.7512        | 3  | V      | 8  | 988.3189        | 494.6631        | 330.1112        |
|         | 488.3231        | 244.6652        | 163.4459        | 4  | L      | 7  | 889.2505        | 445.1289        | 297.0884        |
|         | 545.3446        | 273.1759        | 182.4530        | 5  | G      | 6  | 776.1665        | 388.5869        | 259.3937        |
|         | 712.3429        | 356.6751        | 238.1192        | 6  | S[167] | 5  | 719.1450        | 360.0761        | 240.3865        |
|         | 783.3801        | 392.1937        | 261.7982        | 7  | A      | 4  | 552.1466        | 276.5770        | 184.7204        |
|         | 950.3784        | 475.6928        | 317.4643        | 8  | S[167] | 3  | 481.1095        | 241.0584        | 161.0414        |
|         | 1117.3768       | 559.1920        | 373.1304        | 9  | S[167] | 2  | 314.1112        | 157.5592        | 105.3752        |
|         |                 |                 |                 | 10 | K      | 1  | 147.1128        | 74.0600         | 49.7091         |



# Annotated spectra from Saleem et. al. 2009

R.KGDEESGADIVTS<sub>167</sub>PIT<sub>181</sub>FEK.K/3

0.8346

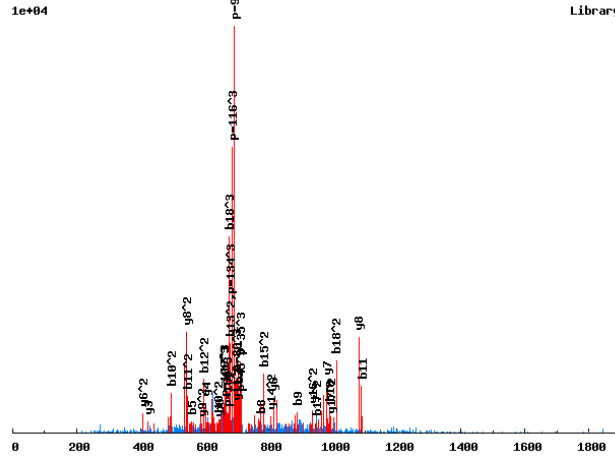

| Library | b <sup>1+</sup>  | b <sup>2+</sup>  | b <sup>3+</sup> | #  | AA     | #  | y <sup>1+</sup>  | y <sup>2+</sup> | y <sup>3+</sup> |
|---------|------------------|------------------|-----------------|----|--------|----|------------------|-----------------|-----------------|
|         | 129.1022         | 65.0548          | 43.7056         | 1  | K      | 19 |                  |                 |                 |
|         | 186.1237         | 93.5655          | 62.7128         | 2  | G      | 18 | 2042.7879        | 1021.8976       | 681.6008        |
|         | 301.1506         | 151.0790         | 101.0551        | 3  | D      | 17 | 1985.7664        | <b>993.3869</b> | <b>662.5937</b> |
|         | 430.1932         | 215.6003         | 144.0693        | 4  | E      | 16 | 1870.7395        | <b>935.8734</b> | 624.2513        |
|         | <b>559.2358</b>  | 280.1216         | 187.0835        | 5  | E      | 15 | 1741.6969        | 871.3521        | 581.2372        |
|         | <b>646.2678</b>  | 323.6376         | 216.0941        | 6  | S      | 14 | 1612.6543        | <b>806.8308</b> | 538.2230        |
|         | <b>703.2893</b>  | 352.1483         | 235.1013        | 7  | G      | 13 | 1525.6223        | 763.3148        | 509.2123        |
|         | <b>774.3264</b>  | 387.6669         | 258.7803        | 8  | A      | 12 | 1468.6008        | 734.8040        | 490.2051        |
|         | <b>889.3534</b>  | 445.1803         | 297.1226        | 9  | D      | 11 | 1397.5637        | <b>699.2855</b> | 466.5261        |
|         | <b>990.4010</b>  | <b>495.7042</b>  | 330.8052        | 10 | T      | 10 | 1282.5368        | <b>641.7720</b> | 428.1838        |
|         | <b>1089.4695</b> | <b>545.2384</b>  | 363.8280        | 11 | V      | 9  | 1181.4891        | <b>591.2482</b> | 394.5012        |
|         | 1190.5171        | <b>595.7622</b>  | 397.5106        | 12 | T      | 8  | <b>1082.4207</b> | <b>541.7140</b> | 361.4784        |
|         | 1357.5155        | <b>679.2614</b>  | 453.1767        | 13 | S[167] | 7  | <b>981.3730</b>  | 491.1901        | 327.7959        |
|         | 1454.5683        | 727.7878         | 485.5276        | 14 | P      | 6  | <b>814.3746</b>  | <b>407.6910</b> | 272.1297        |
|         | 1567.6523        | <b>784.3298</b>  | 523.2223        | 15 | I      | 5  | 717.3219         | 359.1646        | 239.7788        |
|         | 1748.6663        | 874.8368         | 583.5603        | 16 | T[181] | 4  | <b>604.2378</b>  | 302.6225        | 202.0841        |
|         | 1895.7347        | <b>948.3710</b>  | 632.5831        | 17 | F      | 3  | <b>423.2238</b>  | 212.1155        | 141.7461        |
|         | 2024.7773        | <b>1012.8923</b> | <b>675.5973</b> | 18 | E      | 2  | 276.1554         | 138.5813        | 92.7233         |
|         |                  |                  |                 | 19 | K      | 1  | 147.1128         | 74.0600         | 49.7091         |

# Annotated spectra from Saleem et. al. 2009

R.KGEIKPSSGTNSTEC<sub>160</sub>QS<sub>167</sub>PK.S/3

0.998

1e+04

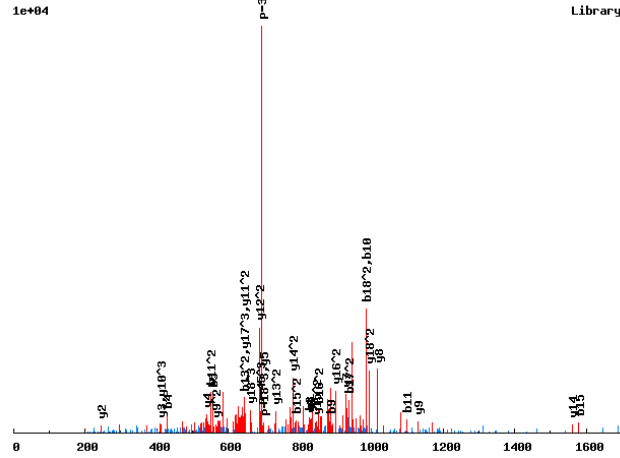

| Library | b <sup>1+</sup> | b <sup>2+</sup> | b <sup>3+</sup> | #  | AA     | #  | y <sup>1+</sup> | y <sup>2+</sup> | y <sup>3+</sup> |
|---------|-----------------|-----------------|-----------------|----|--------|----|-----------------|-----------------|-----------------|
|         | 129.1022        | 65.0548         | 43.7056         | 1  | K      | 19 |                 |                 |                 |
|         | 186.1237        | 93.5655         | 62.7128         | 2  | G      | 18 | 1986.8474       | 993.9273        | 662.9540        |
|         | 315.1663        | 158.0868        | 105.7269        | 3  | E      | 17 | 1929.8260       | 965.4166        | 643.9468        |
|         | 428.2503        | 214.6288        | 143.4216        | 4  | I      | 16 | 1800.7834       | 900.8953        | 600.9326        |
|         | 556.3453        | 278.6763        | 186.1200        | 5  | K      | 15 | 1687.6993       | 844.3533        | 563.2380        |
|         | 653.3981        | 327.2027        | 218.4709        | 6  | P      | 14 | 1559.6043       | 780.3058        | 520.5396        |
|         | 740.4301        | 370.7187        | 247.4816        | 7  | S      | 13 | 1462.5516       | 731.7794        | 488.1887        |
|         | 827.4621        | 414.2347        | 276.4922        | 8  | S      | 12 | 1375.5196       | 688.2634        | 459.1780        |
|         | 884.4836        | 442.7454        | 295.4994        | 9  | G      | 11 | 1288.4875       | 644.7474        | 430.1674        |
|         | 985.5313        | 493.2693        | 329.1819        | 10 | T      | 10 | 1231.4661       | 616.2367        | 411.1602        |
|         | 1099.5742       | 550.2907        | 367.1963        | 11 | N      | 9  | 1130.4184       | 565.7128        | 377.4776        |
|         | 1186.6062       | 593.8068        | 396.2069        | 12 | S      | 8  | 1016.3755       | 508.6914        | 339.4633        |
|         | 1287.6539       | 644.3306        | 429.8895        | 13 | T      | 7  | 929.3434        | 465.1754        | 310.4527        |
|         | 1416.6965       | 708.8519        | 472.9037        | 14 | E      | 6  | 828.2957        | 414.6515        | 276.7701        |
|         | 1576.7272       | 788.8672        | 526.2472        | 15 | C[160] | 5  | 699.2532        | 350.1302        | 233.7559        |
|         | 1704.7857       | 852.8965        | 568.9334        | 16 | Q      | 4  | 539.2225        | 270.1149        | 180.4124        |
|         | 1871.7841       | 936.3957        | 624.5996        | 17 | S[167] | 3  | 411.1639        | 206.0856        | 137.7262        |
|         | 1968.8369       | 984.9221        | 656.9505        | 18 | P      | 2  | 244.1656        | 122.5864        | 82.0600         |
|         |                 |                 |                 | 19 | K      | 1  | 147.1128        | 74.0600         | 49.7091         |

## Annotated spectra from Saleem et. al. 2009

R.KGEIKPSS<sub>167</sub>GTNSTEC<sub>160</sub>QS<sub>167</sub>PK.S/3

0.9945

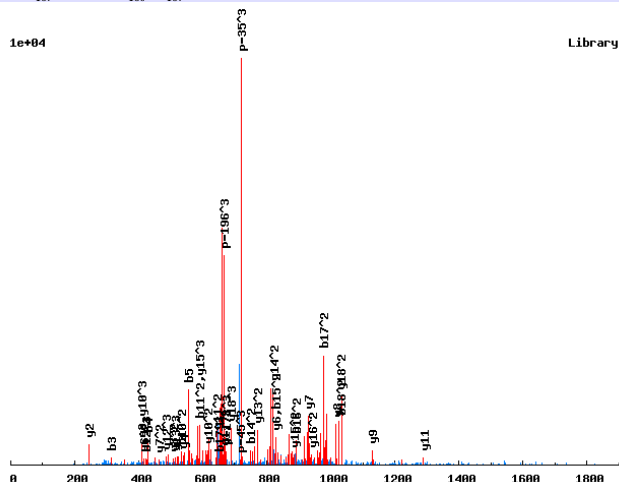

| Library | b <sup>1+</sup> | b <sup>2+</sup> | b <sup>3+</sup> | #  | AA     | #  | y <sup>1+</sup> | y <sup>2+</sup> | y <sup>3+</sup> |
|---------|-----------------|-----------------|-----------------|----|--------|----|-----------------|-----------------|-----------------|
|         | 129.1022        | 65.0548         | 43.7056         | 1  | K      | 19 |                 |                 |                 |
|         | 186.1237        | 93.5655         | 62.7128         | 2  | G      | 18 | 2066.8137       | 1033.9105       | 689.6094        |
|         | 315.1663        | 158.0868        | 105.7269        | 3  | E      | 17 | 2009.7923       | 1005.3998       | 670.6023        |
|         | 428.2503        | 214.6288        | 143.4216        | 4  | I      | 16 | 1880.7497       | 940.8785        | 627.5881        |
|         | 556.3453        | 278.6763        | 186.1200        | 5  | K      | 15 | 1767.6656       | 884.3365        | 589.8934        |
|         | 653.3981        | 327.2027        | 218.4709        | 6  | P      | 14 | 1639.5707       | 820.2890        | 547.1951        |
|         | 740.4301        | 370.7187        | 247.4816        | 7  | S      | 13 | 1542.5179       | 771.7626        | 514.8442        |
|         | 907.4285        | 454.2179        | 303.1477        | 8  | S[167] | 12 | 1455.4859       | 728.2466        | 485.8335        |
|         | 964.4499        | 482.7286        | 322.1548        | 9  | G      | 11 | 1288.4875       | 644.7474        | 430.1674        |
|         | 1065.4976       | 533.2524        | 355.8374        | 10 | T      | 10 | 1231.4661       | 616.2367        | 411.1602        |
|         | 1179.5405       | 590.2739        | 393.8517        | 11 | N      | 9  | 1130.4184       | 565.7128        | 377.4776        |
|         | 1266.5726       | 633.7899        | 422.8624        | 12 | S      | 8  | 1016.3755       | 508.6914        | 339.4633        |
|         | 1367.6202       | 684.3138        | 456.5449        | 13 | T      | 7  | 929.3434        | 465.1754        | 310.4527        |
|         | 1496.6628       | 748.8351        | 499.5591        | 14 | E      | 6  | 828.2957        | 414.6515        | 276.7701        |
|         | 1656.6935       | 828.8504        | 552.9027        | 15 | C[160] | 5  | 699.2532        | 350.1302        | 233.7559        |
|         | 1784.7521       | 892.8797        | 595.5889        | 16 | Q      | 4  | 539.2225        | 270.1149        | 180.4124        |
|         | 1951.7504       | 976.3789        | 651.2550        | 17 | S[167] | 3  | 411.1639        | 206.0856        | 137.7262        |
|         | 2048.8032       | 1024.9052       | 683.6059        | 18 | P      | 2  | 244.1656        | 122.5864        | 82.0600         |
|         |                 |                 |                 | 19 | K      | 1  | 147.1128        | 74.0600         | 49.7091         |

# Annotated spectra from Saleem et. al. 2009

R.KGEIKPS<sub>167</sub>SGTNS<sub>167</sub>TEC<sub>160</sub>QS<sub>167</sub>PK.S/3

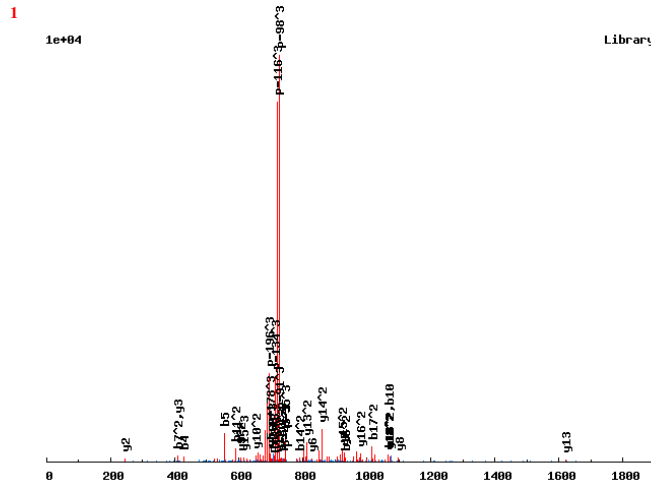

| Library | b <sup>1+</sup> | b <sup>2+</sup> | b <sup>3+</sup> | #  | AA     | #  | y <sup>1+</sup> | y <sup>2+</sup> | y <sup>3+</sup> |
|---------|-----------------|-----------------|-----------------|----|--------|----|-----------------|-----------------|-----------------|
|         | 129.1022        | 65.0548         | 43.7056         | 1  | K      | 19 |                 |                 |                 |
|         | 186.1237        | 93.5655         | 62.7128         | 2  | G      | 18 | 2146.7801       | 1073.8937       | 716.2649        |
|         | 315.1663        | 158.0868        | 105.7269        | 3  | E      | 17 | 2089.7586       | 1045.3829       | 697.2577        |
|         | 428.2503        | 214.6288        | 143.4216        | 4  | I      | 16 | 1960.7160       | 980.8617        | 654.2435        |
|         | 556.3453        | 278.6763        | 186.1200        | 5  | K      | 15 | 1847.6320       | 924.3196        | 616.5488        |
|         | 653.3981        | 327.2027        | 218.4709        | 6  | P      | 14 | 1719.5370       | 860.2721        | 573.8505        |
|         | 820.3964        | 410.7019        | 274.1370        | 7  | S[167] | 13 | 1622.4842       | 811.7458        | 541.4996        |
|         | 907.4285        | 454.2179        | 303.1477        | 8  | S      | 12 | 1455.4859       | 728.2466        | 485.8335        |
|         | 964.4499        | 482.7286        | 322.1548        | 9  | G      | 11 | 1368.4539       | 684.7306        | 456.8228        |
|         | 1065.4976       | 533.2524        | 355.8374        | 10 | T      | 10 | 1311.4324       | 656.2198        | 437.8157        |
|         | 1179.5405       | 590.2739        | 393.8517        | 11 | N      | 9  | 1210.3847       | 605.6960        | 404.1331        |
|         | 1346.5389       | 673.7731        | 449.5178        | 12 | S[167] | 8  | 1096.3418       | 548.6745        | 366.1188        |
|         | 1447.5866       | 724.2969        | 483.2004        | 13 | T      | 7  | 929.3434        | 465.1754        | 310.4527        |
|         | 1576.6292       | 788.8182        | 526.2146        | 14 | E      | 6  | 828.2957        | 414.6515        | 276.7701        |
|         | 1736.6598       | 868.8335        | 579.5581        | 15 | C[160] | 5  | 699.2532        | 350.1302        | 233.7559        |
|         | 1864.7184       | 932.8628        | 622.2443        | 16 | Q      | 4  | 539.2225        | 270.1149        | 180.4124        |
|         | 2031.7168       | 1016.3620       | 677.9104        | 17 | S[167] | 3  | 411.1639        | 206.0856        | 137.7262        |
|         | 2128.7695       | 1064.8884       | 710.2614        | 18 | P      | 2  | 244.1656        | 122.5864        | 82.0600         |
|         |                 |                 |                 | 19 | K      | 1  | 147.1128        | 74.0600         | 49.7091         |

# Annotated spectra from Saleem et. al. 2009

K.KGES<sub>167</sub>TPPHPPENLSSSFYEK.R/3

0.9996

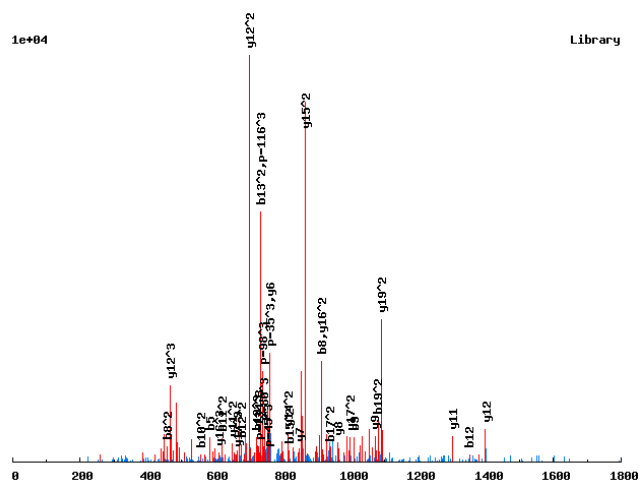

| Library | b <sup>1+</sup> | b <sup>2+</sup> | b <sup>3+</sup> | #  | AA     | #  | y <sup>1+</sup> | y <sup>2+</sup> | y <sup>3+</sup> |
|---------|-----------------|-----------------|-----------------|----|--------|----|-----------------|-----------------|-----------------|
|         | 129.1022        | 65.0548         | 43.7056         | 1  | K      | 20 |                 |                 |                 |
|         | 186.1237        | 93.5655         | 62.7128         | 2  | G      | 19 | 2182.9328       | 1091.9701       | 728.3158        |
|         | 315.1663        | 158.0868        | 105.7269        | 3  | E      | 18 | 2125.9114       | 1063.4593       | 709.3086        |
|         | 482.1647        | 241.5860        | 161.3931        | 4  | S[167] | 17 | 1996.8688       | 998.9380        | 666.2945        |
|         | 583.2123        | 292.1098        | 195.0756        | 5  | T      | 16 | 1829.8704       | 915.4389        | 610.6283        |
|         | 680.2651        | 340.6362        | 227.4266        | 6  | P      | 15 | 1728.8228       | 864.9150        | 576.9458        |
|         | 777.3179        | 389.1626        | 259.7775        | 7  | P      | 14 | 1631.7700       | 816.3886        | 544.5949        |
|         | 914.3768        | 457.6920        | 305.4638        | 8  | H      | 13 | 1534.7172       | 767.8623        | 512.2439        |
|         | 1011.4295       | 506.2184        | 337.8147        | 9  | P      | 12 | 1397.6583       | 699.3328        | 466.5576        |
|         | 1108.4823       | 554.7448        | 370.1656        | 10 | P      | 11 | 1300.6056       | 650.8064        | 434.2067        |
|         | 1237.5249       | 619.2661        | 413.1798        | 11 | E      | 10 | 1203.5528       | 602.2800        | 401.8558        |
|         | 1351.5678       | 676.2875        | 451.1941        | 12 | N      | 9  | 1074.5102       | 537.7587        | 358.8416        |
|         | 1464.6519       | 732.8296        | 488.8888        | 13 | L      | 8  | 960.4673        | 480.7373        | 320.8273        |
|         | 1551.6839       | 776.3456        | 517.8995        | 14 | S      | 7  | 847.3832        | 424.1953        | 283.1326        |
|         | 1638.7159       | 819.8616        | 546.9102        | 15 | S      | 6  | 760.3512        | 380.6792        | 254.1219        |
|         | 1725.7480       | 863.3776        | 575.9208        | 16 | S      | 5  | 673.3192        | 337.1632        | 225.1112        |
|         | 1872.8164       | 936.9118        | 624.9436        | 17 | F      | 4  | 586.2871        | 293.6472        | 196.1006        |
|         | 2035.8797       | 1018.4435       | 679.2981        | 18 | Y      | 3  | 439.2187        | 220.1130        | 147.0778        |
|         | 2164.9223       | 1082.9648       | 722.3123        | 19 | E      | 2  | 276.1554        | 138.5813        | 92.7233         |
|         |                 |                 |                 | 20 | K      | 1  | 147.1128        | 74.0600         | 49.7091         |

# Annotated spectra from Saleem et. al. 2009

K.KGEST<sub>181</sub>PPHPENLSS<sub>167</sub>SFYEKR.K/4

0.9187

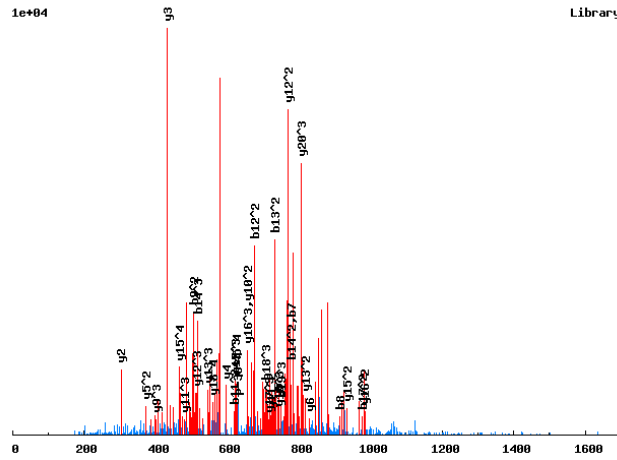

| Library | b <sup>1+</sup> | b <sup>2+</sup> | b <sup>3+</sup> | b <sup>4+</sup> | #  | AA     | #  | y <sup>1+</sup> | y <sup>2+</sup> | y <sup>3+</sup> | y <sup>4+</sup> |
|---------|-----------------|-----------------|-----------------|-----------------|----|--------|----|-----------------|-----------------|-----------------|-----------------|
|         | 129.1022        | 65.0548         | 43.7056         | 33.0310         | 1  | K      | 21 |                 |                 |                 |                 |
|         | 186.1237        | 93.5655         | 62.7128         | 47.2864         | 2  | G      | 20 | 2419.0003       | 1210.0038       | 807.0049        | 605.5055        |
|         | 315.1663        | 158.0868        | 105.7269        | 79.5470         | 3  | E      | 19 | 2361.9788       | 1181.4931       | 787.9978        | 591.2502        |
|         | 402.1983        | 201.6028        | 134.7376        | 101.3050        | 4  | S      | 18 | 2232.9362       | 1116.9718       | 744.9836        | 558.9895        |
|         | 583.2123        | 292.1098        | 195.0756        | 146.5585        | 5  | T[181] | 17 | 2145.9042       | 1073.4557       | 715.9729        | 537.2315        |
|         | 680.2651        | 340.6362        | 227.4266        | 170.8217        | 6  | P      | 16 | 1964.8902       | 982.9487        | 655.6349        | 491.9780        |
|         | 777.3179        | 389.1626        | 259.7775        | 195.0849        | 7  | P      | 15 | 1867.8374       | 934.4224        | 623.2840        | 467.7148        |
|         | 914.3768        | 457.6920        | 305.4638        | 229.3497        | 8  | H      | 14 | 1770.7847       | 885.8960        | 590.9331        | 443.4516        |
|         | 1011.4295       | 506.2184        | 337.8147        | 253.6128        | 9  | P      | 13 | 1633.7258       | 817.3665        | 545.2468        | 409.1869        |
|         | 1108.4823       | 554.7448        | 370.1656        | 277.8760        | 10 | P      | 12 | 1536.6730       | 768.8401        | 512.8959        | 384.9237        |
|         | 1237.5249       | 619.2661        | 413.1798        | 310.1367        | 11 | E      | 11 | 1439.6202       | 720.3138        | 480.5449        | 360.6605        |
|         | 1351.5678       | 676.2875        | 451.1941        | 338.6474        | 12 | N      | 10 | 1310.5777       | 655.7925        | 437.5307        | 328.3999        |
|         | 1464.6519       | 732.8296        | 488.8888        | 366.9184        | 13 | L      | 9  | 1196.5347       | 598.7710        | 399.5164        | 299.8891        |
|         | 1551.6839       | 776.3456        | 517.8995        | 388.6764        | 14 | S      | 8  | 1083.4507       | 542.2290        | 361.8217        | 271.6181        |
|         | 1718.6823       | 859.8448        | 573.5656        | 430.4260        | 15 | S[167] | 7  | 996.4186        | 498.7130        | 332.8111        | 249.8601        |
|         | 1805.7143       | 903.3608        | 602.5763        | 452.1840        | 16 | S      | 6  | 829.4203        | 415.2138        | 277.1449        | 208.1105        |
|         | 1952.7827       | 976.8950        | 651.5991        | 488.9511        | 17 | F      | 5  | 742.3882        | 371.6978        | 248.1343        | 186.3525        |
|         | 2115.8460       | 1058.4267       | 705.9535        | 529.7170        | 18 | Y      | 4  | 595.3198        | 298.1636        | 199.1115        | 149.5854        |
|         | 2244.8886       | 1122.9479       | 748.9677        | 561.9776        | 19 | E      | 3  | 432.2565        | 216.6319        | 144.7570        | 108.8196        |
|         | 2372.9836       | 1186.9954       | 791.6660        | 594.0014        | 20 | K      | 2  | 303.2139        | 152.1106        | 101.7428        | 76.5589         |
|         |                 |                 |                 |                 | 21 | R      | 1  | 175.1190        | 88.0631         | 59.0445         | 44.5352         |

# Annotated spectra from Saleem et. al. 2009

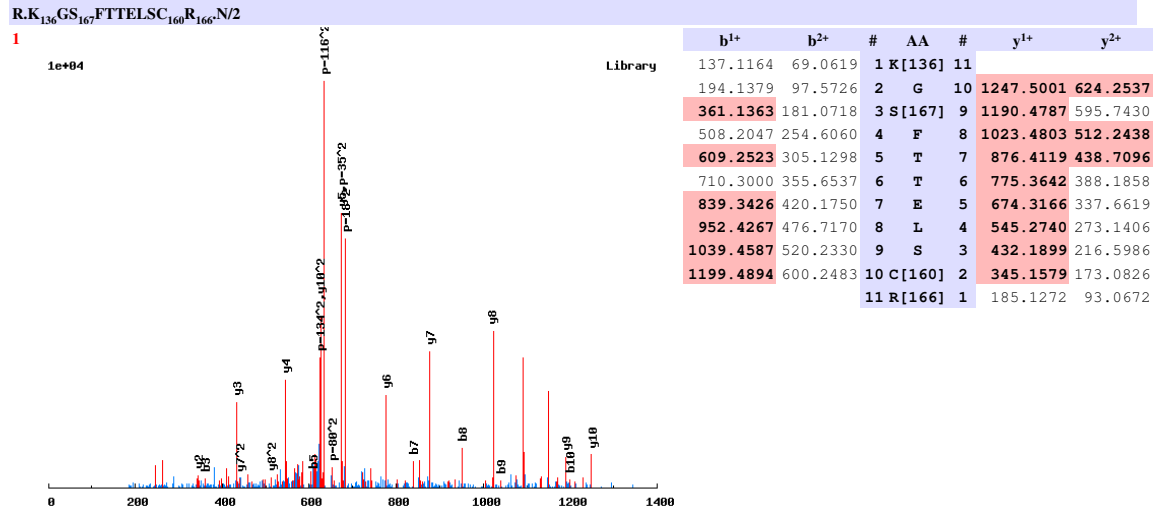

# Annotated spectra from Saleem et. al. 2009

K.KGS<sub>167</sub>LENNIR.E/2

0.9909

1e+04

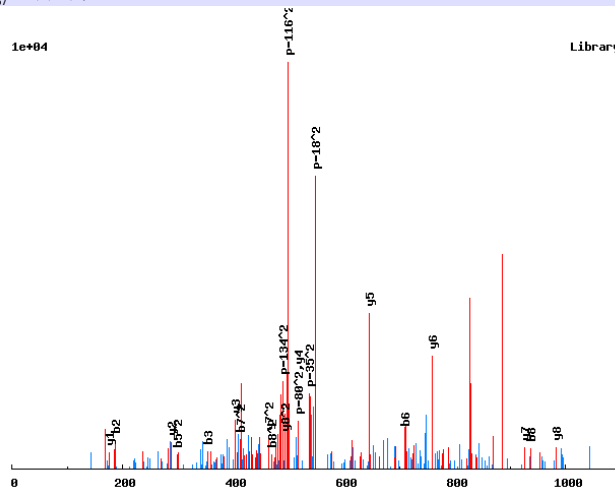

| Library | b <sup>1+</sup> | b <sup>2+</sup> | # | AA     | # | y <sup>1+</sup> | y <sup>2+</sup> |
|---------|-----------------|-----------------|---|--------|---|-----------------|-----------------|
|         | 129.1022        | 65.0548         | 1 | K      | 9 |                 |                 |
|         | 186.1237        | 93.5655         | 2 | G      | 8 | 982.4353        | 491.7213        |
|         | 353.1221        | 177.0647        | 3 | S[167] | 7 | 925.4139        | 463.2106        |
|         | 466.2061        | 233.6067        | 4 | L      | 6 | 758.4155        | 379.7114        |
|         | 595.2487        | 298.1280        | 5 | E      | 5 | 645.3315        | 323.1694        |
|         | 709.2916        | 355.1495        | 6 | N      | 4 | 516.2889        | 258.6481        |
|         | 823.3346        | 412.1709        | 7 | N      | 3 | 402.2459        | 201.6266        |
|         | 936.4186        | 468.7130        | 8 | I      | 2 | 288.2030        | 144.6051        |
|         |                 |                 | 9 | R      | 1 | 175.1190        | 88.0631         |



# Annotated spectra from Saleem et. al. 2009

R.K<sub>136</sub>GS<sub>167</sub>NNS<sub>167</sub>NR<sub>166</sub>PPVIPLGTQEPR<sub>166</sub>S/3

0.682

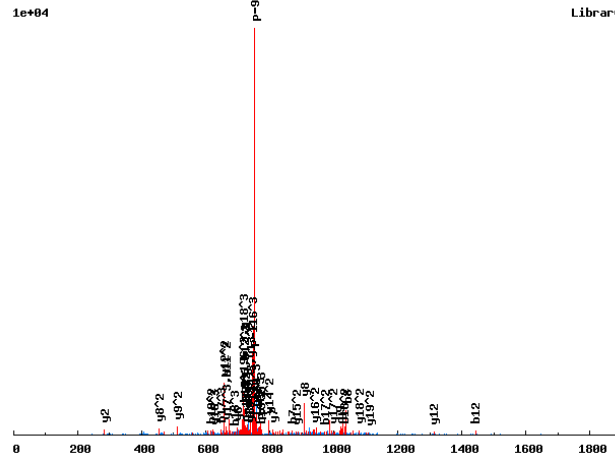

| Library | b <sup>1+</sup> | b <sup>2+</sup> | b <sup>3+</sup> | #  | AA      | #  | y <sup>1+</sup> | y <sup>2+</sup> | y <sup>3+</sup> |
|---------|-----------------|-----------------|-----------------|----|---------|----|-----------------|-----------------|-----------------|
|         | 137.1164        | 69.0619         | 46.3770         | 1  | K [136] | 20 |                 |                 |                 |
|         | 194.1379        | 97.5726         | 65.3842         | 2  | G       | 19 | 2213.0014       | 1107.0044       | 738.3387        |
|         | 361.1363        | 181.0718        | 121.0503        | 3  | S [167] | 18 | 2155.9800       | 1078.4936       | 719.3315        |
|         | 475.1792        | 238.0932        | 159.0646        | 4  | N       | 17 | 1988.9816       | 994.9945        | 663.6654        |
|         | 589.2221        | 295.1147        | 197.0789        | 5  | N       | 16 | 1874.9387       | 937.9730        | 625.6511        |
|         | 756.2205        | 378.6139        | 252.7450        | 6  | S [167] | 15 | 1760.8958       | 880.9515        | 587.6368        |
|         | 870.2634        | 435.6353        | 290.7593        | 7  | N       | 14 | 1593.8974       | 797.4523        | 531.9707        |
|         | 1036.3728       | 518.6900        | 346.1291        | 8  | R [166] | 13 | 1479.8545       | 740.4309        | 493.9563        |
|         | 1133.4255       | 567.2164        | 378.4800        | 9  | P       | 12 | 1313.7451       | 657.3762        | 438.5866        |
|         | 1230.4783       | 615.7428        | 410.8310        | 10 | P       | 11 | 1216.6923       | 608.8498        | 406.2356        |
|         | 1329.5467       | 665.2770        | 443.8538        | 11 | V       | 10 | 1119.6396       | 560.3234        | 373.8847        |
|         | 1442.6308       | 721.8190        | 481.5484        | 12 | I       | 9  | 1020.5712       | 510.7892        | 340.8619        |
|         | 1539.6835       | 770.3454        | 513.8994        | 13 | P       | 8  | 907.4871        | 454.2472        | 303.1672        |
|         | 1652.7676       | 826.8874        | 551.5941        | 14 | L       | 7  | 810.4343        | 405.7208        | 270.8163        |
|         | 1709.7891       | 855.3982        | 570.6012        | 15 | G       | 6  | 697.3503        | 349.1788        | 233.1216        |
|         | 1810.8367       | 905.9220        | 604.2838        | 16 | T       | 5  | 640.3288        | 320.6681        | 214.1145        |
|         | 1938.8953       | 969.9513        | 646.9700        | 17 | Q       | 4  | 539.2811        | 270.1442        | 180.4319        |
|         | 2067.9379       | 1034.4726       | 689.9842        | 18 | E       | 3  | 411.2226        | 206.1149        | 137.7457        |
|         | 2164.9907       | 1082.9990       | 722.3351        | 19 | P       | 2  | 282.1800        | 141.5936        | 94.7315         |
|         |                 |                 |                 | 20 | R [166] | 1  | 185.1272        | 93.0672         | 62.3806         |

# Annotated spectra from Saleem et. al. 2009

K.KHGS<sub>167</sub>IAVTQPR.R/3

0.7306

1e+04

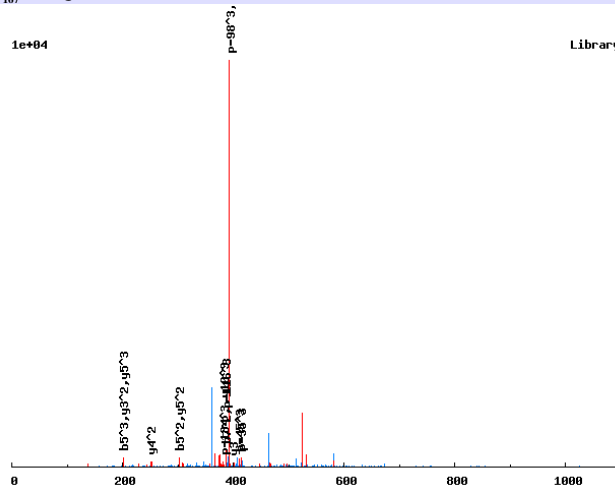

| Library | b <sup>1+</sup> | b <sup>2+</sup> | b <sup>3+</sup> | #  | AA     | #  | y <sup>1+</sup> | y <sup>2+</sup> | y <sup>3+</sup> |
|---------|-----------------|-----------------|-----------------|----|--------|----|-----------------|-----------------|-----------------|
|         | 129.1022        | 65.0548         | 43.7056         | 1  | K      | 11 |                 |                 |                 |
|         | 266.1611        | 133.5842        | 89.3919         | 2  | H      | 10 | 1145.5463       | 573.2768        | 382.5203        |
|         | 323.1826        | 162.0949        | 108.3991        | 3  | G      | 9  | 1008.4874       | 504.7473        | 336.8340        |
|         | 490.1810        | 245.5941        | 164.0652        | 4  | S[167] | 8  | 951.4659        | 476.2366        | 317.8268        |
|         | 603.2650        | 302.1362        | 201.7599        | 5  | I      | 7  | 784.4676        | 392.7374        | 262.1607        |
|         | 674.3021        | 337.6547        | 225.4389        | 6  | A      | 6  | 671.3835        | 336.1954        | 224.4660        |
|         | 773.3706        | 387.1889        | 258.4617        | 7  | V      | 5  | 600.3464        | 300.6768        | 200.7870        |
|         | 874.4182        | 437.7128        | 292.1443        | 8  | T      | 4  | 501.2780        | 251.1426        | 167.7642        |
|         | 1002.4768       | 501.7420        | 334.8305        | 9  | Q      | 3  | 400.2303        | 200.6188        | 134.0816        |
|         | 1099.5296       | 550.2684        | 367.1814        | 10 | P      | 2  | 272.1717        | 136.5895        | 91.3954         |
|         |                 |                 |                 | 11 | R      | 1  | 175.1190        | 88.0631         | 59.0445         |

# Annotated spectra from Saleem et. al. 2009

R.KIEGGST<sub>181</sub>DIEST<sub>181</sub>PKDAAR.S/3

0.715

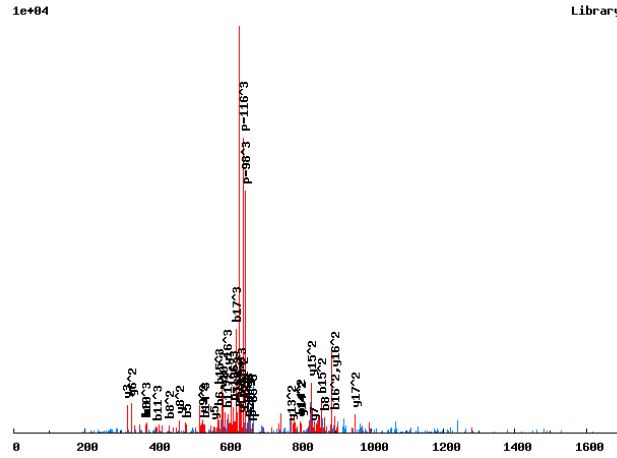

| Library | b <sup>1+</sup> | b <sup>2+</sup> | b <sup>3+</sup> | #  | AA     | #  | y <sup>1+</sup> | y <sup>2+</sup> | y <sup>3+</sup> |
|---------|-----------------|-----------------|-----------------|----|--------|----|-----------------|-----------------|-----------------|
|         | 129.1022        | 65.0548         | 43.7056         | 1  | K      | 18 |                 |                 |                 |
|         | 242.1863        | 121.5968        | 81.4003         | 2  | I      | 17 | 1906.7831       | 953.8952        | 636.2659        |
|         | 371.2289        | 186.1181        | 124.4145        | 3  | E      | 16 | 1793.6990       | 897.3531        | 598.5712        |
|         | 428.2503        | 214.6288        | 143.4216        | 4  | G      | 15 | 1664.6564       | 832.8319        | 555.5570        |
|         | 485.2718        | 243.1395        | 162.4288        | 5  | G      | 14 | 1607.6350       | 804.3211        | 536.5498        |
|         | 572.3038        | 286.6556        | 191.4395        | 6  | S      | 13 | 1550.6135       | 775.8104        | 517.5427        |
|         | 753.3179        | 377.1626        | 251.7775        | 7  | T[181] | 12 | 1463.5815       | 732.2944        | 488.5320        |
|         | 868.3448        | 434.6760        | 290.1198        | 8  | D      | 11 | 1282.5675       | 641.7874        | 428.1940        |
|         | 981.4289        | 491.2181        | 327.8145        | 9  | I      | 10 | 1167.5405       | 584.2739        | 389.8517        |
|         | 1110.4714       | 555.7394        | 370.8287        | 10 | E      | 9  | 1054.4565       | 527.7319        | 352.1570        |
|         | 1197.5035       | 599.2554        | 399.8393        | 11 | S      | 8  | 925.4139        | 463.2106        | 309.1428        |
|         | 1378.5175       | 689.7624        | 460.1773        | 12 | T[181] | 7  | 838.3818        | 419.6946        | 280.1321        |
|         | 1475.5702       | 738.2888        | 492.5283        | 13 | P      | 6  | 657.3678        | 329.1876        | 219.7941        |
|         | 1603.6652       | 802.3362        | 535.2266        | 14 | K      | 5  | 560.3151        | 280.6612        | 187.4432        |
|         | 1718.6921       | 859.8497        | 573.5689        | 15 | D      | 4  | 432.2201        | 216.6137        | 144.7449        |
|         | 1789.7293       | 895.3683        | 597.2479        | 16 | A      | 3  | 317.1932        | 159.1002        | 106.4026        |
|         | 1860.7664       | 930.8868        | 620.9270        | 17 | A      | 2  | 246.1561        | 123.5817        | 82.7235         |
|         |                 |                 |                 | 18 | R      | 1  | 175.1190        | 88.0631         | 59.0445         |

# Annotated spectra from Saleem et. al. 2009

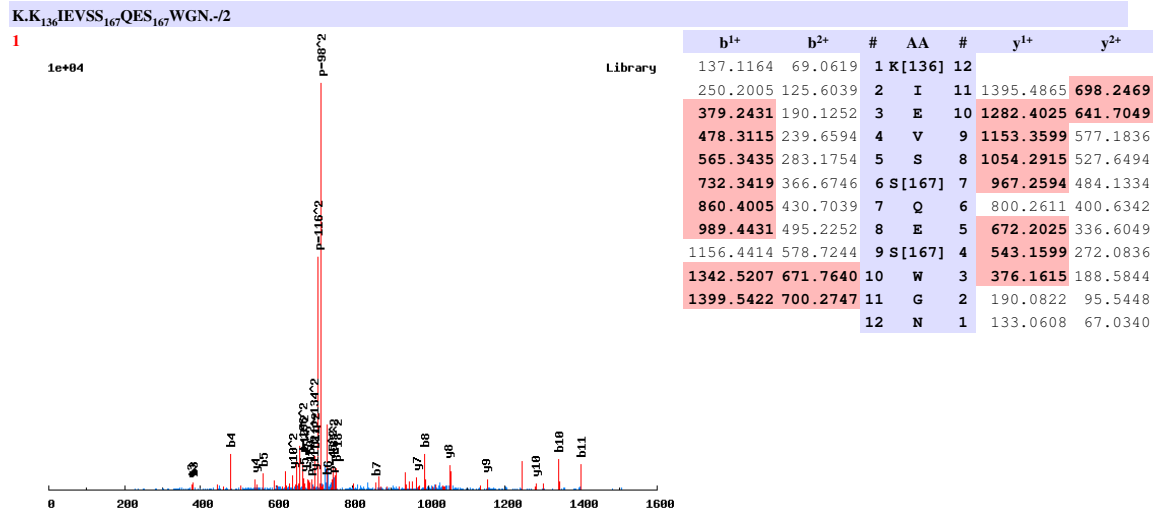

# Annotated spectra from Saleem et. al. 2009

R.KINT<sub>181</sub>NET<sub>181</sub>LPSS<sub>167</sub>LSSPK.L/2

0.999

1e+04

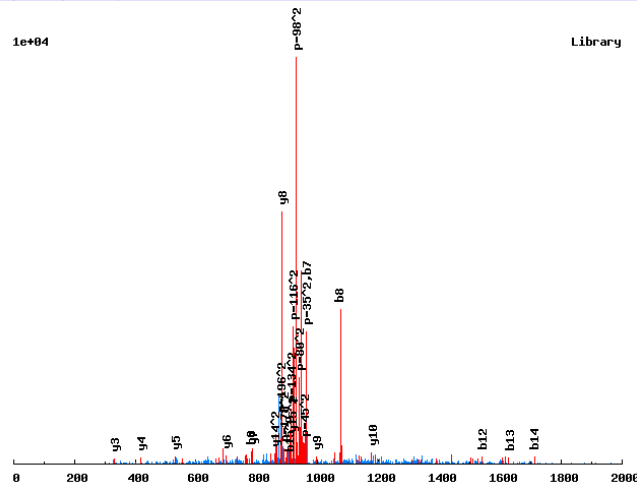

| Library | b <sup>1+</sup> | b <sup>2+</sup> | #  | AA      | #  | y <sup>1+</sup> | y <sup>2+</sup> |
|---------|-----------------|-----------------|----|---------|----|-----------------|-----------------|
|         | 129.1022        | 65.0548         | 1  | K       | 16 |                 |                 |
|         | 242.1863        | 121.5968        | 2  | I       | 15 | 1827.7214       | 914.3644        |
|         | 356.2292        | 178.6183        | 3  | N       | 14 | 1714.6374       | 857.8223        |
|         | 537.2432        | 269.1253        | 4  | T [181] | 13 | 1600.5944       | 800.8009        |
|         | 651.2862        | 326.1467        | 5  | N       | 12 | 1419.5804       | 710.2939        |
|         | 780.3288        | 390.6680        | 6  | E       | 11 | 1305.5375       | 653.2724        |
|         | 961.3428        | 481.1750        | 7  | T [181] | 10 | 1176.4949       | 588.7511        |
|         | 1074.4268       | 537.7171        | 8  | L       | 9  | 995.4809        | 498.2441        |
|         | 1171.4796       | 586.2434        | 9  | P       | 8  | 882.3968        | 441.7021        |
|         | 1258.5116       | 629.7595        | 10 | S       | 7  | 785.3441        | 393.1757        |
|         | 1425.5100       | 713.2586        | 11 | S [167] | 6  | 698.3120        | 349.6597        |
|         | 1538.5940       | 769.8007        | 12 | L       | 5  | 531.3137        | 266.1605        |
|         | 1625.6261       | 813.3167        | 13 | S       | 4  | 418.2296        | 209.6184        |
|         | 1712.6581       | 856.8327        | 14 | S       | 3  | 331.1976        | 166.1024        |
|         | 1809.7109       | 905.3591        | 15 | P       | 2  | 244.1656        | 122.5864        |
|         |                 |                 | 16 | K       | 1  | 147.1128        | 74.0600         |

# Annotated spectra from Saleem et. al. 2009

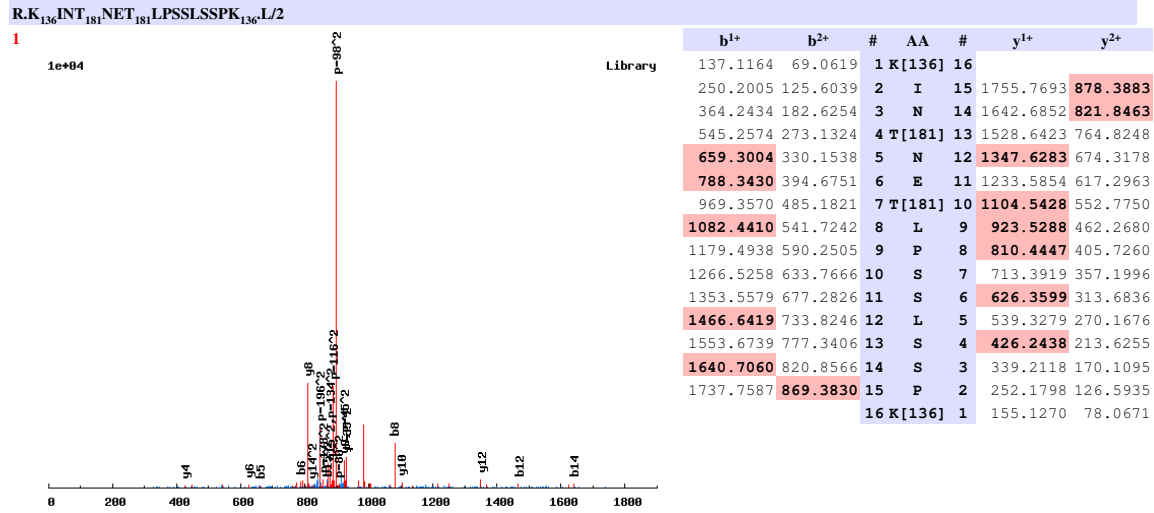

# Annotated spectra from Saleem et. al. 2009

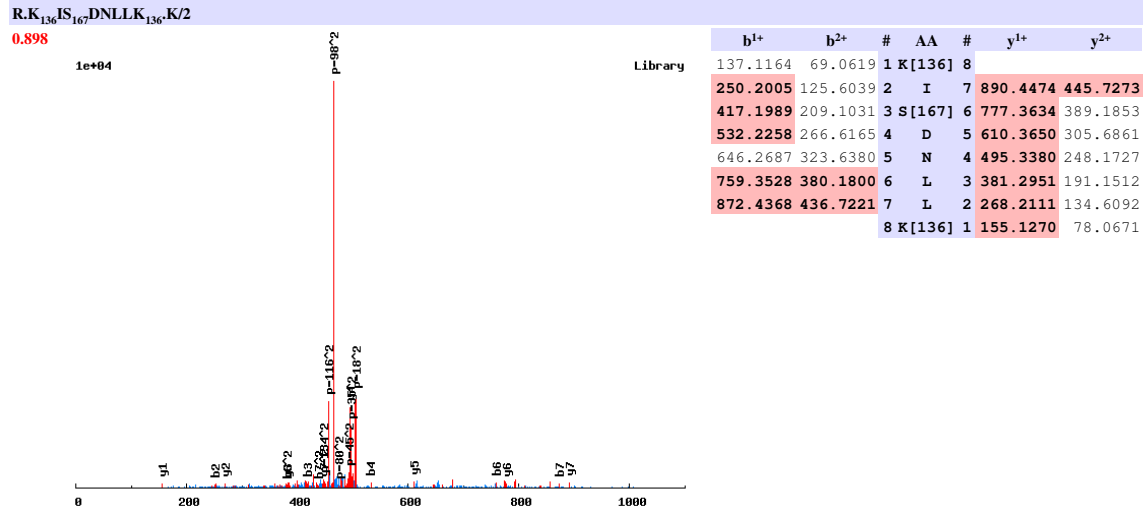

# Annotated spectra from Saleem et. al. 2009

R.KIS<sub>167</sub>GYGNLDAQK.N/2

0.9997

1e+04

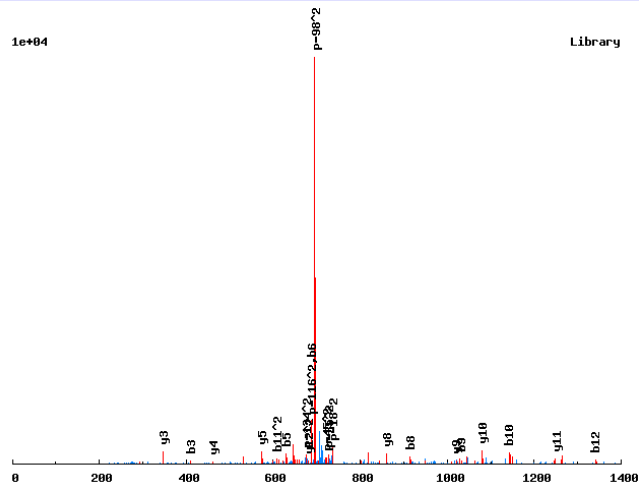

| Library | b <sup>1+</sup> | b <sup>2+</sup> | #  | AA     | #  | y <sup>1+</sup> | y <sup>2+</sup> |
|---------|-----------------|-----------------|----|--------|----|-----------------|-----------------|
|         | 129.1022        | 65.0548         | 1  | K      | 13 |                 |                 |
|         | 242.1863        | 121.5968        | 2  | I      | 12 | 1360.5780       | 680.7927        |
|         | 409.1847        | 205.0960        | 3  | S[167] | 11 | 1247.4940       | 624.2506        |
|         | 466.2061        | 233.6067        | 4  | G      | 10 | 1080.4956       | 540.7514        |
|         | 629.2695        | 315.1384        | 5  | Y      | 9  | 1023.4742       | 512.2407        |
|         | 686.2909        | 343.6491        | 6  | G      | 8  | 860.4108        | 430.7091        |
|         | 800.3338        | 400.6706        | 7  | N      | 7  | 803.3894        | 402.1983        |
|         | 915.3608        | 458.1840        | 8  | D      | 6  | 689.3464        | 345.1769        |
|         | 1028.4448       | 514.7261        | 9  | L      | 5  | 574.3195        | 287.6634        |
|         | 1143.4718       | 572.2395        | 10 | D      | 4  | 461.2354        | 231.1214        |
|         | 1214.5089       | 607.7581        | 11 | A      | 3  | 346.2085        | 173.6079        |
|         | 1342.5675       | 671.7874        | 12 | Q      | 2  | 275.1714        | 138.0893        |
|         |                 |                 | 13 | K      | 1  | 147.1128        | 74.0600         |



# Annotated spectra from Saleem et. al. 2009

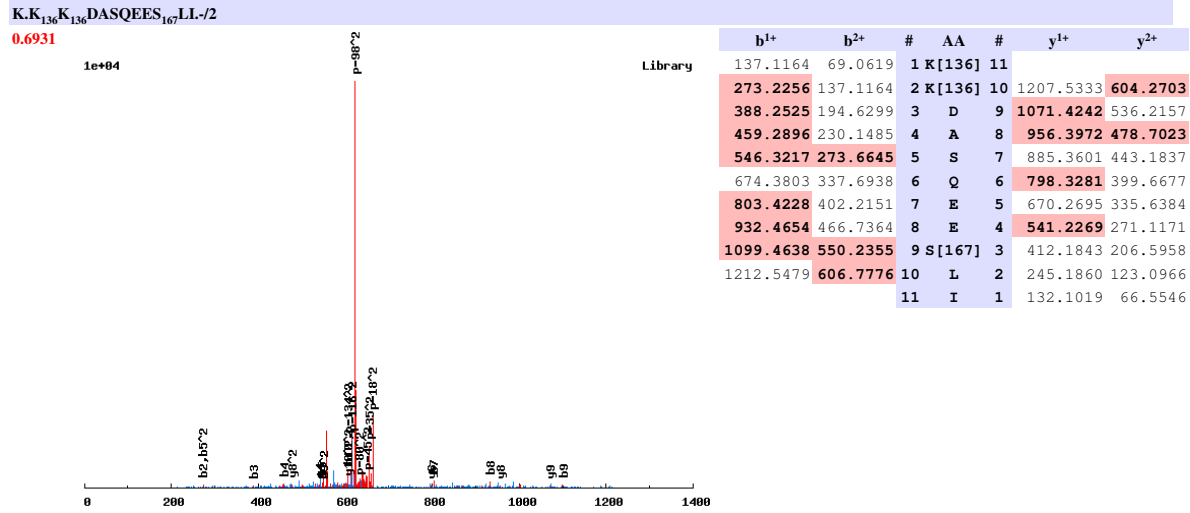

# Annotated spectra from Saleem et. al. 2009

R.K<sub>136</sub>K<sub>136</sub>DES<sub>167</sub>DS<sub>167</sub>ENDIEIK<sub>136</sub>G/2

0.955

1e+04

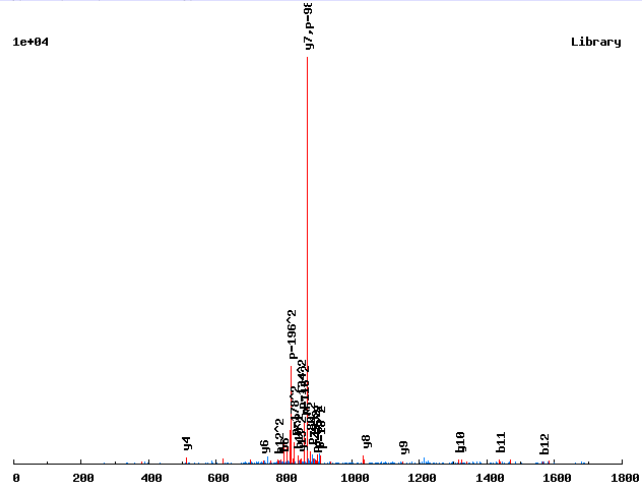

| Library | b <sup>1+</sup> | b <sup>2+</sup> | #  | AA     | #  | y <sup>1+</sup> | y <sup>2+</sup> |
|---------|-----------------|-----------------|----|--------|----|-----------------|-----------------|
|         | 137.1164        | 69.0619         | 1  | K[136] | 14 |                 |                 |
|         | 273.2256        | 137.1164        | 2  | K[136] | 13 | 1697.6525       | 849.3299        |
|         | 388.2525        | 194.6299        | 3  | D      | 12 | 1561.5434       | 781.2753        |
|         | 517.2951        | 259.1512        | 4  | E      | 11 | 1446.5164       | 723.7619        |
|         | 684.2935        | 342.6504        | 5  | S[167] | 10 | 1317.4738       | 659.2406        |
|         | 799.3204        | 400.1639        | 6  | D      | 9  | 1150.4755       | 575.7414        |
|         | 966.3188        | 483.6630        | 7  | S[167] | 8  | 1035.4485       | 518.2279        |
|         | 1095.3614       | 548.1843        | 8  | E      | 7  | 868.4502        | 434.7287        |
|         | 1209.4043       | 605.2058        | 9  | N      | 6  | 739.4076        | 370.2074        |
|         | 1324.4312       | 662.7193        | 10 | D      | 5  | 625.3646        | 313.1860        |
|         | 1437.5153       | 719.2613        | 11 | I      | 4  | 510.3377        | 255.6725        |
|         | 1566.5579       | 783.7826        | 12 | E      | 3  | 397.2536        | 199.1305        |
|         | 1679.6420       | 840.3246        | 13 | I      | 2  | 268.2111        | 134.6092        |
|         |                 |                 | 14 | K[136] | 1  | 155.1270        | 78.0671         |

# Annotated spectra from Saleem et. al. 2009

K.KKGS<sub>167</sub>GEDDEEETETPTSTVPVATIAQETLK.V/3

0.9994

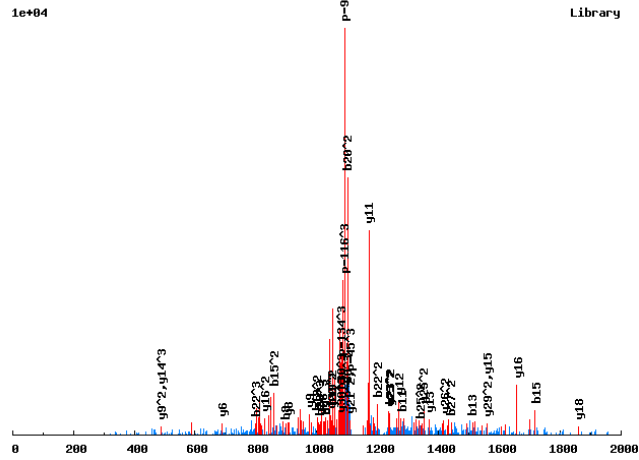

| Library | b <sup>1+</sup> | b <sup>2+</sup> | b <sup>3+</sup> | #  | AA     | #  | y <sup>1+</sup> | y <sup>2+</sup> | y <sup>3+</sup> |
|---------|-----------------|-----------------|-----------------|----|--------|----|-----------------|-----------------|-----------------|
|         | 129.1022        | 65.0548         | 43.7056         | 1  | K      | 31 |                 |                 |                 |
|         | 257.1972        | 129.1022        | 86.4039         | 2  | K      | 30 | 3243.4675       | 1622.2374       | 1081.8274       |
|         | 314.2187        | 157.6130        | 105.4111        | 3  | G      | 29 | 3115.3726       | 1558.1899       | 1039.1290       |
|         | 481.2170        | 241.1122        | 161.0772        | 4  | S[167] | 28 | 3058.3511       | 1529.6792       | 1020.1219       |
|         | 538.2385        | 269.6229        | 180.0843        | 5  | G      | 27 | 2891.3527       | 1446.1800       | 964.4558        |
|         | 667.2811        | 334.1442        | 223.0985        | 6  | E      | 26 | 2834.3313       | 1417.6693       | 945.4486        |
|         | 782.3080        | 391.6576        | 261.4409        | 7  | D      | 25 | 2705.2887       | 1353.1480       | 902.4344        |
|         | 897.3350        | 449.1711        | 299.7832        | 8  | D      | 24 | 2590.2617       | 1295.6345       | 864.0921        |
|         | 1026.3775       | 513.6924        | 342.7974        | 9  | E      | 23 | 2475.2348       | 1238.1210       | 825.7498        |
|         | 1155.4201       | 578.2137        | 385.8116        | 10 | E      | 22 | 2346.1922       | 1173.5997       | 782.7356        |
|         | 1284.4627       | 642.7350        | 428.8258        | 11 | E      | 21 | 2217.1496       | 1109.0784       | 739.7214        |
|         | 1385.5104       | 693.2588        | 462.5083        | 12 | T      | 20 | 2088.1070       | 1044.5572       | 696.7072        |
|         | 1514.5530       | 757.7801        | 505.5225        | 13 | E      | 19 | 1987.0593       | 994.0333        | 663.0246        |
|         | 1615.6007       | 808.3040        | 539.2051        | 14 | T      | 18 | 1858.0168       | 929.5120        | 620.0104        |
|         | 1716.6484       | 858.8278        | 572.8876        | 15 | T      | 17 | 1756.9691       | 878.9882        | 586.3279        |
|         | 1813.7011       | 907.3542        | 605.2386        | 16 | P      | 16 | 1655.9214       | 828.4643        | 552.6453        |
|         | 1914.7488       | 957.8780        | 638.9211        | 17 | T      | 15 | 1558.8686       | 779.9380        | 520.2944        |
|         | 2001.7808       | 1001.3941       | 667.9318        | 18 | S      | 14 | 1457.8210       | 729.4141        | 486.6118        |
|         | 2102.8285       | 1051.9179       | 701.6144        | 19 | T      | 13 | 1370.7889       | 685.8981        | 457.6012        |
|         | 2201.8969       | 1101.4521       | 734.6372        | 20 | V      | 12 | 1269.7412       | 635.3743        | 423.9186        |
|         | 2298.9497       | 1149.9785       | 766.9881        | 21 | P      | 11 | 1170.6728       | 585.8401        | 390.8958        |
|         | 2398.0181       | 1199.5127       | 800.0109        | 22 | V      | 10 | 1073.6201       | 537.3137        | 358.5449        |
|         | 2469.0552       | 1235.0312       | 823.6899        | 23 | A      | 9  | 974.5517        | 487.7795        | 325.5221        |
|         | 2570.1029       | 1285.5551       | 857.3725        | 24 | T      | 8  | 903.5146        | 452.2609        | 301.8430        |
|         | 2683.1869       | 1342.0971       | 895.0672        | 25 | I      | 7  | 802.4669        | 401.7371        | 268.1605        |
|         | 2754.2240       | 1377.6157       | 918.7462        | 26 | A      | 6  | 689.3828        | 345.1951        | 230.4658        |
|         | 2882.2826       | 1441.6450       | 961.4324        | 27 | Q      | 5  | 618.3457        | 309.6765        | 206.7868        |
|         | 3011.3252       | 1506.1662       | 1004.4466       | 28 | E      | 4  | 490.2871        | 245.6472        | 164.1006        |
|         | 3112.3729       | 1556.6901       | 1038.1292       | 29 | T      | 3  | 361.2445        | 181.1259        | 121.0864        |
|         | 3225.4570       | 1613.2321       | 1075.8238       | 30 | L      | 2  | 260.1969        | 130.6021        | 87.4038         |
|         |                 |                 |                 | 31 | K      | 1  | 147.1128        | 74.0600         | 49.7091         |

# Annotated spectra from Saleem et. al. 2009

K.KKGS<sub>167</sub>GEDDEET<sub>181</sub>ETTPSTVVPVATIAQETLK.V/3

0.9863

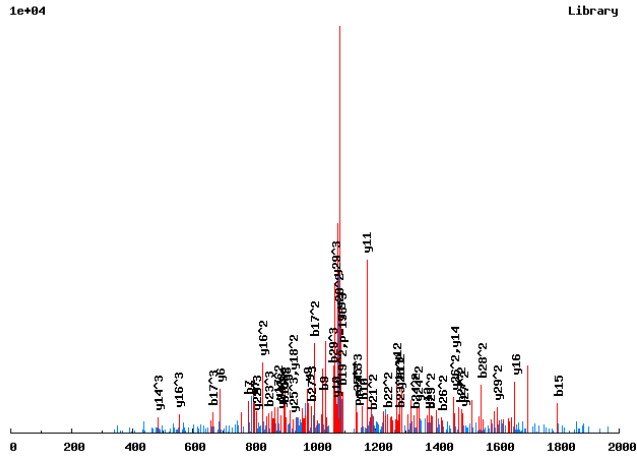

| Library | b <sup>1+</sup>  | b <sup>2+</sup>  | b <sup>3+</sup>  | #  | AA     | #  | y <sup>1+</sup>  | y <sup>2+</sup>  | y <sup>3+</sup>  |
|---------|------------------|------------------|------------------|----|--------|----|------------------|------------------|------------------|
|         | 129.1022         | 65.0548          | 43.7056          | 1  | K      | 31 |                  |                  |                  |
|         | 257.1972         | 129.1022         | 86.4039          | 2  | K      | 30 | 3323.4338        | 1662.2206        | 1108.4828        |
|         | 314.2187         | 157.6130         | 105.4111         | 3  | G      | 29 | 3195.3389        | <b>1598.1731</b> | <b>1065.7845</b> |
|         | 481.2170         | 241.1122         | 161.0772         | 4  | S[167] | 28 | 3138.3174        | 1569.6624        | 1046.7773        |
|         | 538.2385         | 269.6229         | 180.0843         | 5  | G      | 27 | 2971.3191        | <b>1486.1632</b> | 991.1112         |
|         | 667.2811         | 334.1442         | 223.0985         | 6  | E      | 26 | 2914.2976        | <b>1457.6524</b> | 972.1041         |
|         | <b>782.3080</b>  | 391.6576         | 261.4409         | 7  | D      | 25 | 2785.2550        | 1393.1311        | <b>929.0899</b>  |
|         | <b>897.3350</b>  | 449.1711         | 299.7832         | 8  | D      | 24 | 2670.2281        | <b>1335.6177</b> | <b>890.7475</b>  |
|         | <b>1026.3775</b> | 513.6924         | 342.7974         | 9  | E      | 23 | 2555.2011        | <b>1278.1042</b> | 852.4052         |
|         | <b>1155.4201</b> | 578.2137         | 385.8116         | 10 | E      | 22 | 2426.1585        | 1213.5829        | <b>809.3910</b>  |
|         | <b>1284.4627</b> | 642.7350         | 428.8258         | 11 | E      | 21 | 2297.1160        | 1149.0616        | 766.3768         |
|         | 1465.4767        | 733.2420         | 489.1638         | 12 | T[181] | 20 | 2168.0734        | <b>1084.5403</b> | 723.3626         |
|         | 1594.5193        | 797.7633         | 532.1780         | 13 | E      | 19 | 1987.0593        | 994.0333         | 663.0246         |
|         | 1695.5670        | 848.2871         | 565.8605         | 14 | T      | 18 | 1858.0168        | <b>929.5120</b>  | 620.0104         |
|         | <b>1796.6147</b> | <b>898.8110</b>  | 599.5431         | 15 | T      | 17 | 1756.9691        | <b>878.9882</b>  | 586.3279         |
|         | 1893.6674        | 947.3374         | 631.8940         | 16 | P      | 16 | <b>1655.9214</b> | <b>828.4643</b>  | <b>552.6453</b>  |
|         | 1994.7151        | <b>997.8612</b>  | <b>665.5766</b>  | 17 | T      | 15 | 1558.8686        | 779.9380         | 520.2944         |
|         | 2081.7472        | 1041.3772        | 694.5872         | 18 | S      | 14 | <b>1457.8210</b> | 729.4141         | <b>486.6118</b>  |
|         | 2182.7948        | <b>1091.9011</b> | 728.2698         | 19 | T      | 13 | <b>1370.7889</b> | 685.8981         | 457.6012         |
|         | 2281.8632        | 1141.4353        | 761.2926         | 20 | V      | 12 | <b>1269.7412</b> | 635.3743         | 423.9186         |
|         | 2378.9160        | <b>1189.9616</b> | 793.6435         | 21 | P      | 11 | <b>1170.6728</b> | 585.8401         | 390.8958         |
|         | 2477.9844        | <b>1239.4958</b> | 826.6663         | 22 | V      | 10 | <b>1073.6201</b> | 537.3137         | 358.5449         |
|         | 2549.0215        | <b>1275.0144</b> | <b>850.3454</b>  | 23 | A      | 9  | <b>974.5517</b>  | 487.7795         | 325.5221         |
|         | 2650.0692        | <b>1325.5382</b> | 884.0279         | 24 | T      | 8  | <b>903.5146</b>  | 452.2609         | 301.8430         |
|         | 2763.1533        | <b>1382.0803</b> | 921.7226         | 25 | I      | 7  | <b>802.4669</b>  | 401.7371         | 268.1605         |
|         | 2834.1904        | <b>1417.5988</b> | 945.4016         | 26 | A      | 6  | <b>689.3828</b>  | 345.1951         | 230.4658         |
|         | 2962.2490        | <b>1481.6281</b> | <b>988.0878</b>  | 27 | Q      | 5  | 618.3457         | 309.6765         | 206.7868         |
|         | 3091.2915        | <b>1546.1494</b> | 1031.1020        | 28 | E      | 4  | 490.2871         | 245.6472         | 164.1006         |
|         | 3192.3392        | 1596.6733        | <b>1064.7846</b> | 29 | T      | 3  | 361.2445         | 181.1259         | 121.0864         |
|         | 3305.4233        | 1653.2153        | 1102.4793        | 30 | L      | 2  | 260.1969         | 130.6021         | 87.4038          |
|         |                  |                  |                  | 31 | K      | 1  | 147.1128         | 74.0600          | 49.7091          |

# Annotated spectra from Saleem et. al. 2009

K.K<sub>136</sub>K<sub>136</sub>GS<sub>167</sub>GEDDEEETET<sub>181</sub>PTS<sub>167</sub>TVPVATIAQETLK<sub>136</sub>V/3

0.7382

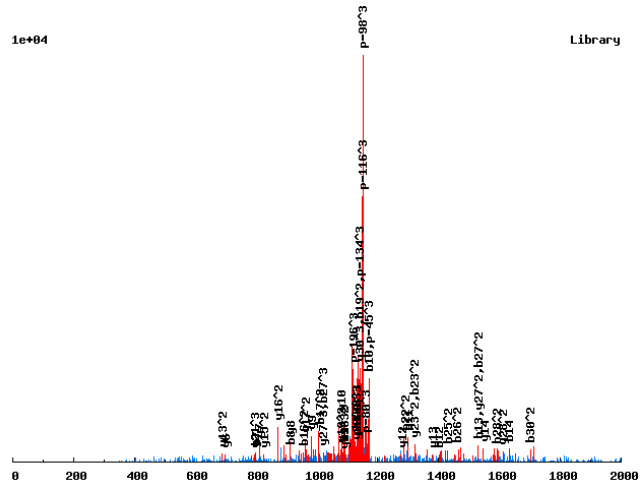

| Library | b <sup>1+</sup> | b <sup>2+</sup> | b <sup>3+</sup> | #  | AA     | #  | y <sup>1+</sup> | y <sup>2+</sup> | y <sup>3+</sup> |
|---------|-----------------|-----------------|-----------------|----|--------|----|-----------------|-----------------|-----------------|
|         | 137.1164        | 69.0619         | 46.3770         | 1  | K[136] | 31 |                 |                 |                 |
|         | 273.2256        | 137.1164        | 91.7467         | 2  | K[136] | 30 | 3419.4286       | 1710.2179       | 1140.4810       |
|         | 330.2471        | 165.6272        | 110.7539        | 3  | G      | 29 | 3283.3194       | 1642.1633       | 1095.1113       |
|         | 497.2454        | 249.1263        | 166.4200        | 4  | S[167] | 28 | 3226.2980       | 1613.6526       | 1076.1042       |
|         | 554.2669        | 277.6371        | 185.4271        | 5  | G      | 27 | 3059.2996       | 1530.1534       | 1020.4381       |
|         | 683.3095        | 342.1584        | 228.4413        | 6  | E      | 26 | 3002.2781       | 1501.6427       | 1001.4309       |
|         | 798.3364        | 399.6718        | 266.7837        | 7  | D      | 25 | 2873.2355       | 1437.1214       | 958.4167        |
|         | 913.3633        | 457.1853        | 305.1260        | 8  | D      | 24 | 2758.2086       | 1379.6079       | 920.0744        |
|         | 1042.4059       | 521.7066        | 348.1402        | 9  | E      | 23 | 2643.1817       | 1322.0945       | 881.7321        |
|         | 1171.4485       | 586.2279        | 391.1544        | 10 | E      | 22 | 2514.1391       | 1257.5732       | 838.7179        |
|         | 1300.4911       | 650.7492        | 434.1686        | 11 | E      | 21 | 2385.0965       | 1193.0519       | 795.7037        |
|         | 1401.5388       | 701.2730        | 467.8511        | 12 | T      | 20 | 2256.0539       | 1128.5306       | 752.6895        |
|         | 1530.5814       | 765.7943        | 510.8653        | 13 | E      | 19 | 2155.0062       | 1078.0067       | 719.0069        |
|         | 1631.6291       | 816.3182        | 544.5479        | 14 | T      | 18 | 2025.9636       | 1013.4855       | 675.9927        |
|         | 1812.6431       | 906.8252        | 604.8859        | 15 | T[181] | 17 | 1924.9159       | 962.9616        | 642.3102        |
|         | 1909.6958       | 955.3516        | 637.2368        | 16 | P      | 16 | 1743.9019       | 872.4546        | 581.9722        |
|         | 2010.7435       | 1005.8754       | 670.9194        | 17 | T      | 15 | 1646.8492       | 823.9282        | 549.6212        |
|         | 2177.7419       | 1089.3746       | 726.5855        | 18 | S[167] | 14 | 1545.8015       | 773.4044        | 515.9387        |
|         | 2278.7896       | 1139.8984       | 760.2680        | 19 | T      | 13 | 1378.8031       | 689.9052        | 460.2726        |
|         | 2377.8580       | 1189.4326       | 793.2908        | 20 | V      | 12 | 1277.7554       | 639.3814        | 426.5900        |
|         | 2474.9107       | 1237.9590       | 825.6418        | 21 | P      | 11 | 1178.6870       | 589.8472        | 393.5672        |
|         | 2573.9791       | 1287.4932       | 858.6646        | 22 | V      | 10 | 1081.6343       | 541.3208        | 361.2163        |
|         | 2645.0163       | 1323.0118       | 882.3436        | 23 | A      | 9  | 982.5659        | 491.7866        | 328.1935        |
|         | 2746.0639       | 1373.5356       | 916.0262        | 24 | T      | 8  | 911.5288        | 456.2680        | 304.5144        |
|         | 2859.1480       | 1430.0776       | 953.7209        | 25 | I      | 7  | 810.4811        | 405.7442        | 270.8319        |
|         | 2930.1851       | 1465.5962       | 977.3999        | 26 | A      | 6  | 697.3970        | 349.2021        | 233.1372        |
|         | 3058.2437       | 1529.6255       | 1020.0861       | 27 | Q      | 5  | 626.3599        | 313.6836        | 209.4582        |
|         | 3187.2863       | 1594.1468       | 1063.1003       | 28 | E      | 4  | 498.3013        | 249.6543        | 166.7720        |
|         | 3288.3340       | 1644.6706       | 1096.7828       | 29 | T      | 3  | 369.2587        | 185.1330        | 123.7578        |
|         | 3401.4180       | 1701.2126       | 1134.4775       | 30 | L      | 2  | 268.2111        | 134.6092        | 90.0752         |
|         |                 |                 |                 | 31 | K[136] | 1  | 155.1270        | 78.0671         | 52.3805         |

Annotated spectra from Saleem et. al. 2009

R.K<sub>136</sub>K<sub>136</sub>NESNDAEVS<sub>167</sub>ENEDTTGLTSPTR<sub>166</sub>V/3

0.9617

1e+04

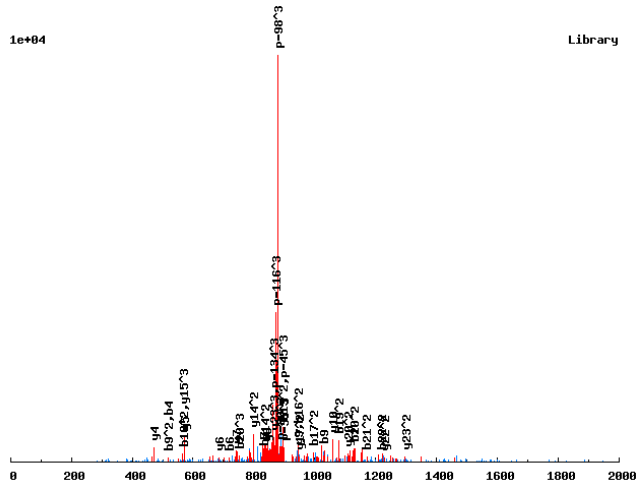

| Library | b <sup>1+</sup>  | b <sup>2+</sup>  | b <sup>3+</sup> | #  | AA     | #  | y <sup>1+</sup>  | y <sup>2+</sup>  | y <sup>3+</sup> |
|---------|------------------|------------------|-----------------|----|--------|----|------------------|------------------|-----------------|
|         | 137.1164         | 69.0619          | 46.3770         | 1  | K[136] | 24 |                  |                  |                 |
|         | 273.2256         | 137.1164         | 91.7467         | 2  | K[136] | 23 | 2592.1063        | <b>1296.5568</b> | <b>864.7070</b> |
|         | 387.2685         | 194.1379         | 129.7610        | 3  | N      | 22 | 2455.9972        | <b>1228.5022</b> | 819.3372        |
|         | <b>516.3111</b>  | 258.6592         | 172.7752        | 4  | E      | 21 | 2341.9543        | 1171.4808        | 781.3229        |
|         | 603.3431         | 302.1752         | 201.7859        | 5  | S      | 20 | 2212.9117        | <b>1106.9595</b> | 738.3087        |
|         | <b>717.3861</b>  | 359.1967         | 239.8002        | 6  | N      | 19 | 2125.8796        | 1063.4435        | 709.2981        |
|         | <b>832.4130</b>  | 416.7101         | 278.1425        | 7  | D      | 18 | 2011.8367        | 1006.4220        | 671.2838        |
|         | 903.4501         | 452.2287         | 301.8216        | 8  | A      | 17 | 1896.8098        | <b>948.9085</b>  | 632.9414        |
|         | <b>1032.4927</b> | <b>516.7500</b>  | 344.8358        | 9  | E      | 16 | 1825.7727        | 913.3900         | 609.2624        |
|         | <b>1131.5611</b> | <b>566.2842</b>  | 377.8586        | 10 | V      | 15 | 1696.7301        | 848.8687         | <b>566.2482</b> |
|         | 1298.5595        | 649.7834         | 433.5247        | 11 | S[167] | 14 | 1597.6617        | <b>799.3345</b>  | 533.2254        |
|         | 1427.6021        | 714.3047         | 476.5389        | 12 | E      | 13 | 1430.6633        | 715.8353         | 477.5593        |
|         | 1541.6450        | 771.3261         | 514.5532        | 13 | N      | 12 | 1301.6207        | 651.3140         | 434.5451        |
|         | 1670.6876        | <b>835.8474</b>  | 557.5674        | 14 | E      | 11 | 1187.5778        | 594.2925         | 396.5308        |
|         | 1785.7145        | <b>893.3609</b>  | 595.9097        | 15 | D      | 10 | <b>1058.5352</b> | 529.7712         | 353.5166        |
|         | 1886.7622        | <b>943.8847</b>  | 629.5923        | 16 | T      | 9  | <b>943.5082</b>  | 472.2578         | 315.1743        |
|         | 1987.8099        | <b>994.4086</b>  | 663.2748        | 17 | T      | 8  | <b>842.4606</b>  | 421.7339         | 281.4917        |
|         | 2044.8314        | 1022.9193        | 682.2820        | 18 | G      | 7  | <b>741.4129</b>  | 371.2101         | 247.8091        |
|         | 2157.9154        | <b>1079.4613</b> | 719.9767        | 19 | L      | 6  | <b>684.3914</b>  | 342.6994         | 228.8020        |
|         | 2258.9631        | <b>1129.9852</b> | <b>753.6592</b> | 20 | T      | 5  | <b>571.3074</b>  | 286.1573         | 191.1073        |
|         | 2345.9951        | <b>1173.5012</b> | 782.6699        | 21 | S      | 4  | <b>470.2597</b>  | 235.6335         | 157.4247        |
|         | 2443.0479        | <b>1222.0276</b> | 815.0208        | 22 | P      | 3  | 383.2277         | 192.1175         | 128.4141        |
|         | 2544.0956        | 1272.5514        | 848.7034        | 23 | T      | 2  | 286.1749         | 143.5911         | 96.0632         |
|         |                  |                  |                 | 24 | R[166] | 1  | 185.1272         | 93.0672          | 62.3806         |

### Annotated spectra from Saleem et. al. 2009

R.KLAS<sub>167</sub>-SGEVDKIES<sub>167</sub>PR.M/3

0.9813

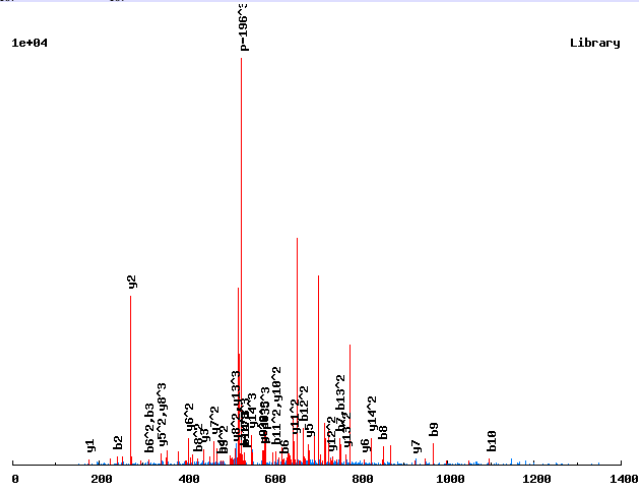

| Library | b <sup>1+</sup> | b <sup>2+</sup> | b <sup>3+</sup> | #  | AA     | #  | y <sup>1+</sup> | y <sup>2+</sup> | y <sup>3+</sup> |
|---------|-----------------|-----------------|-----------------|----|--------|----|-----------------|-----------------|-----------------|
|         | 129.1022        | 65.0548         | 43.7056         | 1  | K      | 15 |                 |                 |                 |
|         | 242.1863        | 121.5968        | 81.4003         | 2  | L      | 14 | 1647.7026       | 824.3550        | 549.9057        |
|         | 313.2234        | 157.1153        | 105.0793        | 3  | A      | 13 | 1534.6186       | 767.8129        | 512.2110        |
|         | 480.2218        | 240.6145        | 160.7454        | 4  | S[167] | 12 | 1463.5815       | 732.2944        | 488.5320        |
|         | 567.2538        | 284.1305        | 189.7561        | 5  | S      | 11 | 1296.5831       | 648.7952        | 432.8659        |
|         | 624.2753        | 312.6413        | 208.7633        | 6  | G      | 10 | 1209.5511       | 605.2792        | 403.8552        |
|         | 753.3179        | 377.1626        | 251.7775        | 7  | E      | 9  | 1152.5296       | 576.7685        | 384.8481        |
|         | 852.3863        | 426.6968        | 284.8003        | 8  | V      | 8  | 1023.4870       | 512.2472        | 341.8339        |
|         | 967.4132        | 484.2102        | 323.1426        | 9  | D      | 7  | 924.4186        | 462.7130        | 308.8111        |
|         | 1095.5082       | 548.2577        | 365.8409        | 10 | K      | 6  | 809.3917        | 405.1995        | 270.4687        |
|         | 1208.5922       | 604.7998        | 403.5356        | 11 | I      | 5  | 681.2967        | 341.1520        | 227.7704        |
|         | 1337.6348       | 669.3210        | 446.5498        | 12 | E      | 4  | 568.2127        | 284.6100        | 190.0757        |
|         | 1504.6332       | 752.8202        | 502.2159        | 13 | S[167] | 3  | 439.1701        | 220.0887        | 147.0615        |
|         | 1601.6859       | 801.3466        | 534.5668        | 14 | P      | 2  | 272.1717        | 136.5895        | 91.3954         |
|         |                 |                 |                 | 15 | R      | 1  | 175.1190        | 88.0631         | 59.0445         |

# Annotated spectra from Saleem et. al. 2009

R.K<sub>136</sub>LDAEAK<sub>136</sub>S<sub>167</sub>AS<sub>167</sub>SS<sub>167</sub>PAPK<sub>136</sub>D/2

0.8314

1e+04

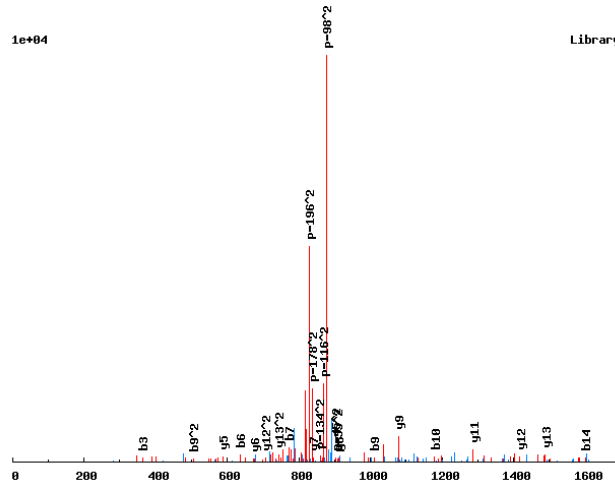

| Library | b <sup>1+</sup> | b <sup>2+</sup> | #  | AA     | #  | y <sup>1+</sup> | y <sup>2+</sup> |
|---------|-----------------|-----------------|----|--------|----|-----------------|-----------------|
|         | 137.1164        | 69.0619         | 1  | K[136] | 16 |                 |                 |
|         | 250.2005        | 125.6039        | 2  | L      | 15 | 1714.6708       | 857.8391        |
|         | 365.2274        | 183.1174        | 3  | D      | 14 | 1601.5868       | 801.2970        |
|         | 436.2645        | 218.6359        | 4  | A      | 13 | 1486.5598       | 743.7836        |
|         | 565.3071        | 283.1572        | 5  | E      | 12 | 1415.5227       | 708.2650        |
|         | 636.3442        | 318.6758        | 6  | A      | 11 | 1286.4801       | 643.7437        |
|         | 772.4534        | 386.7303        | 7  | K[136] | 10 | 1215.4430       | 608.2251        |
|         | 939.4518        | 470.2295        | 8  | S[167] | 9  | 1079.3339       | 540.1706        |
|         | 1010.4889       | 505.7481        | 9  | A      | 8  | 912.3355        | 456.6714        |
|         | 1177.4872       | 589.2473        | 10 | S[167] | 7  | 841.2984        | 421.1528        |
|         | 1264.5193       | 632.7633        | 11 | S      | 6  | 674.3000        | 337.6537        |
|         | 1431.5176       | 716.2625        | 12 | S[167] | 5  | 587.2680        | 294.1376        |
|         | 1528.5704       | 764.7888        | 13 | P      | 4  | 420.2696        | 210.6385        |
|         | 1599.6075       | 800.3074        | 14 | A      | 3  | 323.2169        | 162.1121        |
|         | 1696.6603       | 848.8338        | 15 | P      | 2  | 252.1798        | 126.5935        |
|         |                 |                 | 16 | K[136] | 1  | 155.1270        | 78.0671         |



# Annotated spectra from Saleem et. al. 2009

K.K<sub>136</sub>LEHNQPSIS<sub>167</sub>YIC<sub>160</sub>SR<sub>166</sub>F/3

0.9991

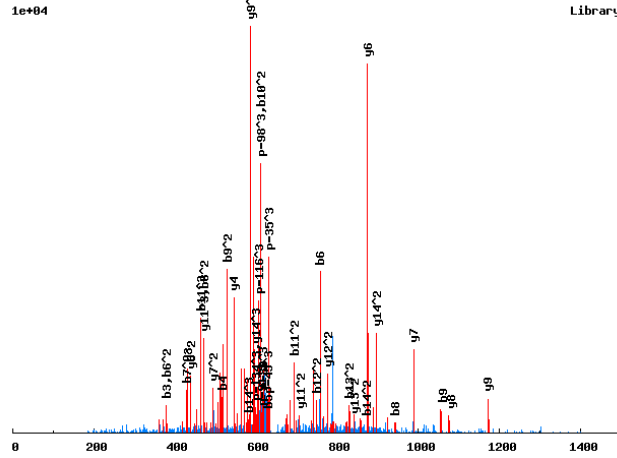

| Library | b <sup>1+</sup> | b <sup>2+</sup> | b <sup>3+</sup> | #  | AA     | #  | y <sup>1+</sup> | y <sup>2+</sup> | y <sup>3+</sup> |
|---------|-----------------|-----------------|-----------------|----|--------|----|-----------------|-----------------|-----------------|
|         | 137.1164        | 69.0619         | 46.3770         | 1  | K[136] | 15 |                 |                 |                 |
|         | 250.2005        | 125.6039        | 84.0717         | 2  | L      | 14 | 1793.7916       | 897.3994        | 598.6020        |
|         | 379.2431        | 190.1252        | 127.0859        | 3  | E      | 13 | 1680.7075       | 840.8574        | 560.9074        |
|         | 516.3020        | 258.6546        | 172.7722        | 4  | H      | 12 | 1551.6649       | 776.3361        | 517.8932        |
|         | 630.3449        | 315.6761        | 210.7865        | 5  | N      | 11 | 1414.6060       | 707.8066        | 472.2069        |
|         | 758.4035        | 379.7054        | 253.4727        | 6  | Q      | 10 | 1300.5631       | 650.7852        | 434.1925        |
|         | 855.4563        | 428.2318        | 285.8236        | 7  | P      | 9  | 1172.5045       | 586.7559        | 391.5064        |
|         | 942.4883        | 471.7478        | 314.8343        | 8  | S      | 8  | 1075.4517       | 538.2295        | 359.1554        |
|         | 1055.5724       | 528.2898        | 352.5290        | 9  | I      | 7  | 988.4197        | 494.7135        | 330.1448        |
|         | 1222.5707       | 611.7890        | 408.1951        | 10 | S[167] | 6  | 875.3357        | 438.1715        | 292.4501        |
|         | 1385.6341       | 693.3207        | 462.5495        | 11 | Y      | 5  | 708.3373        | 354.6723        | 236.7840        |
|         | 1498.7181       | 749.8627        | 500.2442        | 12 | I      | 4  | 545.2740        | 273.1406        | 182.4295        |
|         | 1658.7488       | 829.8780        | 553.5878        | 13 | C[160] | 3  | 432.1899        | 216.5986        | 144.7348        |
|         | 1745.7808       | 873.3940        | 582.5985        | 14 | S      | 2  | 272.1592        | 136.5833        | 91.3913         |
|         |                 |                 |                 | 15 | R[166] | 1  | 185.1272        | 93.0672         | 62.3806         |

# Annotated spectra from Saleem et. al. 2009

K.KLNELQNS<sub>16</sub>EDS<sub>16</sub>DAEDGGK.Q/3

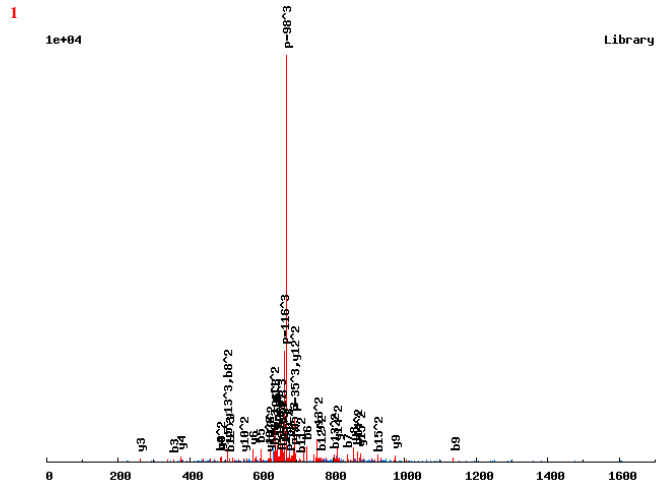

| Library | b <sup>1+</sup> | b <sup>2+</sup> | b <sup>3+</sup> | #  | AA     | #  | y <sup>1+</sup> | y <sup>2+</sup> | y <sup>3+</sup> |
|---------|-----------------|-----------------|-----------------|----|--------|----|-----------------|-----------------|-----------------|
|         | 129.1022        | 65.0548         | 43.7056         | 1  | K      | 18 |                 |                 |                 |
|         | 242.1863        | 121.5968        | 81.4003         | 2  | L      | 17 | 1980.7107       | 990.8590        | 660.9084        |
|         | 356.2292        | 178.6183        | 119.4146        | 3  | N      | 16 | 1867.6266       | 934.3170        | 623.2137        |
|         | 485.2718        | 243.1395        | 162.4288        | 4  | E      | 15 | 1753.5837       | 877.2955        | 585.1994        |
|         | 598.3559        | 299.6816        | 200.1235        | 5  | L      | 14 | 1624.5411       | 812.7742        | 542.1852        |
|         | 726.4145        | 363.7109        | 242.8097        | 6  | Q      | 13 | 1511.4571       | 756.2322        | 504.4905        |
|         | 840.4574        | 420.7323        | 280.8240        | 7  | N      | 12 | 1383.3985       | 692.2029        | 461.8043        |
|         | 1007.4558       | 504.2315        | 336.4901        | 8  | S[167] | 11 | 1269.3556       | 635.1814        | 423.7900        |
|         | 1136.4983       | 568.7528        | 379.5043        | 9  | E      | 10 | 1102.3572       | 551.6822        | 368.1239        |
|         | 1251.5253       | 626.2663        | 417.8466        | 10 | D      | 9  | 973.3146        | 487.1609        | 325.1097        |
|         | 1418.5236       | 709.7655        | 473.5127        | 11 | S[167] | 8  | 858.2877        | 429.6475        | 286.7674        |
|         | 1533.5506       | 767.2789        | 511.8550        | 12 | D      | 7  | 691.2893        | 346.1483        | 231.1013        |
|         | 1604.5877       | 802.7975        | 535.5341        | 13 | A      | 6  | 576.2624        | 288.6348        | 192.7590        |
|         | 1733.6303       | 867.3188        | 578.5483        | 14 | E      | 5  | 505.2252        | 253.1163        | 169.0799        |
|         | 1848.6572       | 924.8323        | 616.8906        | 15 | D      | 4  | 376.1827        | 188.5950        | 126.0657        |
|         | 1905.6787       | 953.3430        | 635.8977        | 16 | G      | 3  | 261.1557        | 131.0815        | 87.7234         |
|         | 1962.7001       | 981.8537        | 654.9049        | 17 | G      | 2  | 204.1343        | 102.5708        | 68.7163         |
|         |                 |                 |                 | 18 | K      | 1  | 147.1128        | 74.0600         | 49.7091         |

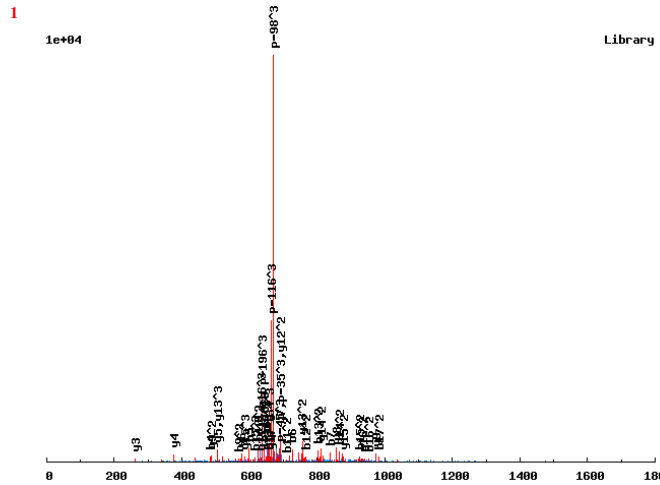

| Library | b <sup>1+</sup> | b <sup>2+</sup> | b <sup>3+</sup> | #  | AA     | #  | y <sup>1+</sup> | y <sup>2+</sup> | y <sup>3+</sup> |
|---------|-----------------|-----------------|-----------------|----|--------|----|-----------------|-----------------|-----------------|
|         | 129.1022        | 65.0548         | 43.7056         | 1  | K      | 18 |                 |                 |                 |
|         | 242.1863        | 121.5968        | 81.4003         | 2  | L      | 17 | 1980.7107       | 990.8590        | 660.9084        |
|         | 356.2292        | 178.6183        | 119.4146        | 3  | N      | 16 | 1867.6266       | 934.3170        | 623.2137        |
|         | 485.2718        | 243.1395        | 162.4288        | 4  | E      | 15 | 1753.5837       | 877.2955        | 585.1994        |
|         | 598.3559        | 299.6816        | 200.1235        | 5  | L      | 14 | 1624.5411       | 812.7742        | 542.1852        |
|         | 726.4145        | 363.7109        | 242.8097        | 6  | Q      | 13 | 1511.4571       | 756.2322        | 504.4905        |
|         | 840.4574        | 420.7323        | 280.8240        | 7  | N      | 12 | 1383.3985       | 692.2029        | 461.8043        |
|         | 1007.4558       | 504.2315        | 336.4901        | 8  | S[167] | 11 | 1269.3556       | 635.1814        | 423.7900        |
|         | 1136.4983       | 568.7528        | 379.5043        | 9  | E      | 10 | 1102.3572       | 551.6822        | 368.1239        |
|         | 1251.5253       | 626.2663        | 417.8466        | 10 | D      | 9  | 973.3146        | 487.1609        | 325.1097        |
|         | 1418.5236       | 709.7655        | 473.5127        | 11 | S[167] | 8  | 858.2877        | 429.6475        | 286.7674        |
|         | 1533.5506       | 767.2789        | 511.8550        | 12 | D      | 7  | 691.2893        | 346.1483        | 231.1013        |
|         | 1604.5877       | 802.7975        | 535.5341        | 13 | A      | 6  | 576.2624        | 288.6348        | 192.7590        |
|         | 1733.6303       | 867.3188        | 578.5483        | 14 | E      | 5  | 505.2252        | 253.1163        | 169.0799        |
|         | 1848.6572       | 924.8323        | 616.8906        | 15 | D      | 4  | 376.1827        | 188.5950        | 126.0657        |
|         | 1905.6787       | 953.3430        | 635.8977        | 16 | G      | 3  | 261.1557        | 131.0815        | 87.7234         |
|         | 1962.7001       | 981.8537        | 654.9049        | 17 | G      | 2  | 204.1343        | 102.5708        | 68.7163         |
|         |                 |                 |                 | 18 | K      | 1  | 147.1128        | 74.0600         | 49.7091         |

Annotated spectra from Saleem et. al. 2009

K.KLNNQPQVETEANES<sub>167</sub>DDANS<sub>167</sub>MIK.G/3

0.9998

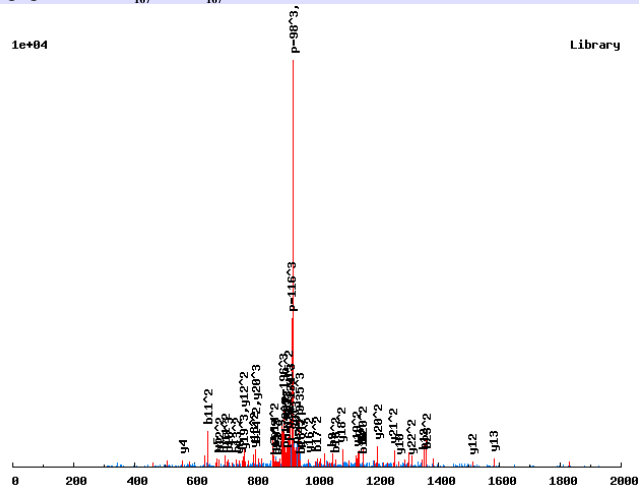

| Library | b <sup>1+</sup> | b <sup>2+</sup> | b <sup>3+</sup> | #  | AA     | #  | y <sup>1+</sup> | y <sup>2+</sup> | y <sup>3+</sup> |
|---------|-----------------|-----------------|-----------------|----|--------|----|-----------------|-----------------|-----------------|
|         | 129.1022        | 65.0548         | 43.7056         | 1  | K      | 24 |                 |                 |                 |
|         | 242.1863        | 121.5968        | 81.4003         | 2  | L      | 23 | 2736.0743       | 1368.5408       | 912.6963        |
|         | 356.2292        | 178.6183        | 119.4146        | 3  | N      | 22 | 2622.9903       | 1311.9988       | 875.0016        |
|         | 470.2722        | 235.6397        | 157.4289        | 4  | N      | 21 | 2508.9473       | 1254.9773       | 836.9873        |
|         | 598.3307        | 299.6690        | 200.1151        | 5  | Q      | 20 | 2394.9044       | 1197.9558       | 798.9730        |
|         | 695.3835        | 348.1954        | 232.4660        | 6  | P      | 19 | 2266.8458       | 1133.9266       | 756.2868        |
|         | 823.4421        | 412.2247        | 275.1522        | 7  | Q      | 18 | 2169.7931       | 1085.4002       | 723.9359        |
|         | 922.5105        | 461.7589        | 308.1750        | 8  | V      | 17 | 2041.7345       | 1021.3709       | 681.2497        |
|         | 1051.5531       | 526.2802        | 351.1892        | 9  | E      | 16 | 1942.6661       | 971.8367        | 648.2269        |
|         | 1152.6008       | 576.8040        | 384.8718        | 10 | T      | 15 | 1813.6235       | 907.3154        | 605.2127        |
|         | 1281.6434       | 641.3253        | 427.8860        | 11 | E      | 14 | 1712.5758       | 856.7915        | 571.5301        |
|         | 1352.6805       | 676.8439        | 451.5650        | 12 | A      | 13 | 1583.5332       | 792.2702        | 528.5159        |
|         | 1466.7234       | 733.8653        | 489.5793        | 13 | N      | 12 | 1512.4961       | 756.7517        | 504.8369        |
|         | 1595.7660       | 798.3866        | 532.5935        | 14 | E      | 11 | 1398.4532       | 699.7302        | 466.8226        |
|         | 1724.8086       | 862.9079        | 575.6077        | 15 | E      | 10 | 1269.4106       | 635.2089        | 423.8084        |
|         | 1891.8069       | 946.4071        | 631.2738        | 16 | S[167] | 9  | 1140.3680       | 570.6876        | 380.7942        |
|         | 2006.8339       | 1003.9206       | 669.6161        | 17 | D      | 8  | 973.3696        | 487.1885        | 325.1281        |
|         | 2121.8608       | 1061.4340       | 707.9585        | 18 | D      | 7  | 858.3427        | 429.6750        | 286.7858        |
|         | 2192.8979       | 1096.9526       | 731.6375        | 19 | A      | 6  | 743.3158        | 372.1615        | 248.4434        |
|         | 2306.9409       | 1153.9741       | 769.6518        | 20 | N      | 5  | 672.2786        | 336.6430        | 224.7644        |
|         | 2473.9392       | 1237.4732       | 825.3179        | 21 | S[167] | 4  | 558.2357        | 279.6215        | 186.7501        |
|         | 2604.9797       | 1302.9935       | 868.9981        | 22 | M      | 3  | 391.2373        | 196.1223        | 131.0840        |
|         | 2718.0638       | 1359.5355       | 906.6928        | 23 | I      | 2  | 260.1969        | 130.6021        | 87.4038         |
|         |                 |                 |                 | 24 | K      | 1  | 147.1128        | 74.0600         | 49.7091         |

# Annotated spectra from Saleem et. al. 2009

K.KLS<sub>167</sub>DLSLSGSK.Q/2

0.9999

1e+04

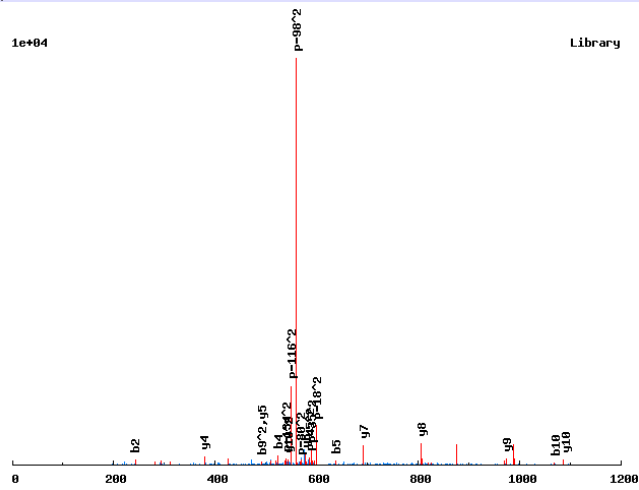

| Library | b <sup>1+</sup>  | b <sup>2+</sup> | #  | AA     | #  | y <sup>1+</sup>  | y <sup>2+</sup> |
|---------|------------------|-----------------|----|--------|----|------------------|-----------------|
|         | 129.1022         | 65.0548         | 1  | K      | 11 |                  |                 |
|         | <b>242.1863</b>  | 121.5968        | 2  | L      | 10 | <b>1086.5078</b> | <b>543.7576</b> |
|         | 409.1847         | 205.0960        | 3  | S[167] | 9  | 973.4238         | 487.2155        |
|         | <b>524.2116</b>  | 262.6094        | 4  | D      | 8  | <b>806.4254</b>  | 403.7163        |
|         | <b>637.2957</b>  | 319.1515        | 5  | L      | 7  | <b>691.3985</b>  | 346.2029        |
|         | 724.3277         | 362.6675        | 6  | S      | 6  | <b>578.3144</b>  | 289.6608        |
|         | 837.4118         | 419.2095        | 7  | L      | 5  | <b>491.2824</b>  | 246.1448        |
|         | 924.4438         | 462.7255        | 8  | S      | 4  | <b>378.1983</b>  | 189.6028        |
|         | 981.4652         | <b>491.2363</b> | 9  | G      | 3  | 291.1663         | 146.0868        |
|         | <b>1068.4973</b> | 534.7523        | 10 | S      | 2  | 234.1448         | 117.5761        |
|         |                  |                 | 11 | K      | 1  | 147.1128         | 74.0600         |

# Annotated spectra from Saleem et. al. 2009

K.KLS<sub>167</sub>DLS<sub>167</sub>LSGSK.Q/2

0.9999

1e+04

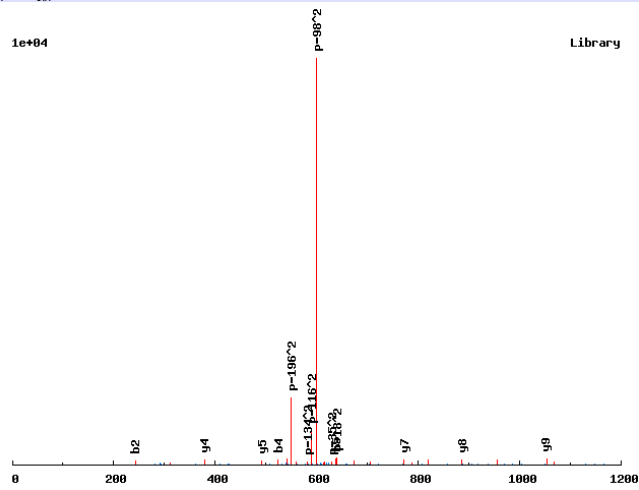

| Library | b <sup>1+</sup> | b <sup>2+</sup> | #         | AA       | #        | y <sup>1+</sup> | y <sup>2+</sup> |
|---------|-----------------|-----------------|-----------|----------|----------|-----------------|-----------------|
|         | 129.1022        | 65.0548         | 1         | K        | 11       |                 |                 |
|         | <b>242.1863</b> | 121.5968        | 2         | L        | 10       | 1166.4742       | 583.7407        |
|         | 409.1847        | 205.0960        | 3         | S[167]   | 9        | 1053.3901       | 527.1987        |
|         | <b>524.2116</b> | 262.6094        | 4         | D        | 8        | <b>886.3917</b> | 443.6995        |
|         | <b>637.2957</b> | 319.1515        | 5         | L        | 7        | <b>771.3648</b> | 386.1860        |
|         | 804.2940        | 402.6507        | 6         | S[167]   | 6        | 658.2807        | 329.6440        |
|         | 917.3781        | 459.1927        | 7         | L        | 5        | <b>491.2824</b> | 246.1448        |
|         | 1004.4101       | 502.7087        | 8         | S        | 4        | <b>378.1983</b> | 189.6028        |
|         | 1061.4316       | 531.2194        | 9         | G        | 3        | 291.1663        | 146.0868        |
|         | 1148.4636       | 574.7354        | 10        | S        | 2        | 234.1448        | 117.5761        |
|         |                 |                 | <b>11</b> | <b>K</b> | <b>1</b> | 147.1128        | 74.0600         |

# Annotated spectra from Saleem et. al. 2009

R.K<sub>136</sub>LS<sub>167</sub>FHS<sub>167</sub>PNASSIR<sub>166</sub>K/3

0.7584

1e+04

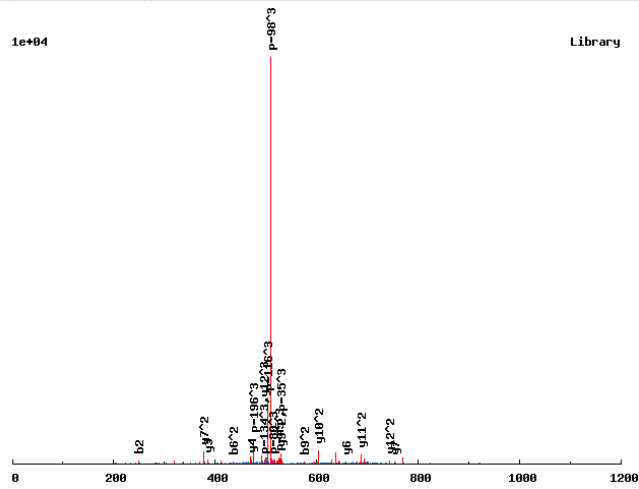

| Library | b <sup>1+</sup> | b <sup>2+</sup> | b <sup>3+</sup> | #  | AA     | #  | y <sup>1+</sup> | y <sup>2+</sup> | y <sup>3+</sup> |
|---------|-----------------|-----------------|-----------------|----|--------|----|-----------------|-----------------|-----------------|
|         | 137.1164        | 69.0619         | 46.3770         | 1  | K[136] | 13 |                 |                 |                 |
|         | <b>250.2005</b> | 125.6039        | 84.0717         | 2  | L      | 12 | 1485.6162       | <b>743.3118</b> | <b>495.8769</b> |
|         | 417.1989        | 209.1031        | 139.7378        | 3  | S[167] | 11 | 1372.5322       | <b>686.7697</b> | 458.1822        |
|         | 564.2673        | 282.6373        | 188.7606        | 4  | F      | 10 | 1205.5338       | <b>603.2705</b> | 402.5161        |
|         | 701.3262        | 351.1667        | 234.4469        | 5  | H      | 9  | 1058.4654       | <b>529.7363</b> | 353.4933        |
|         | 868.3245        | <b>434.6659</b> | 290.1130        | 6  | S[167] | 8  | 921.4065        | 461.2069        | 307.8070        |
|         | 965.3773        | 483.1923        | 322.4640        | 7  | P      | 7  | <b>754.4081</b> | <b>377.7077</b> | 252.1409        |
|         | 1079.4202       | 540.2138        | 360.4783        | 8  | N      | 6  | <b>657.3554</b> | 329.1813        | 219.7900        |
|         | 1150.4573       | <b>575.7323</b> | 384.1573        | 9  | A      | 5  | 543.3124        | 272.1599        | 181.7757        |
|         | 1237.4894       | 619.2483        | 413.1680        | 10 | S      | 4  | <b>472.2753</b> | 236.6413        | 158.0966        |
|         | 1324.5214       | 662.7643        | 442.1787        | 11 | S      | 3  | <b>385.2433</b> | 193.1253        | 129.0860        |
|         | 1437.6055       | 719.3064        | 479.8733        | 12 | I      | 2  | 298.2113        | 149.6093        | 100.0753        |
|         |                 |                 |                 | 13 | R[166] | 1  | 185.1272        | 93.0672         | 62.3806         |

# Annotated spectra from Saleem et. al. 2009

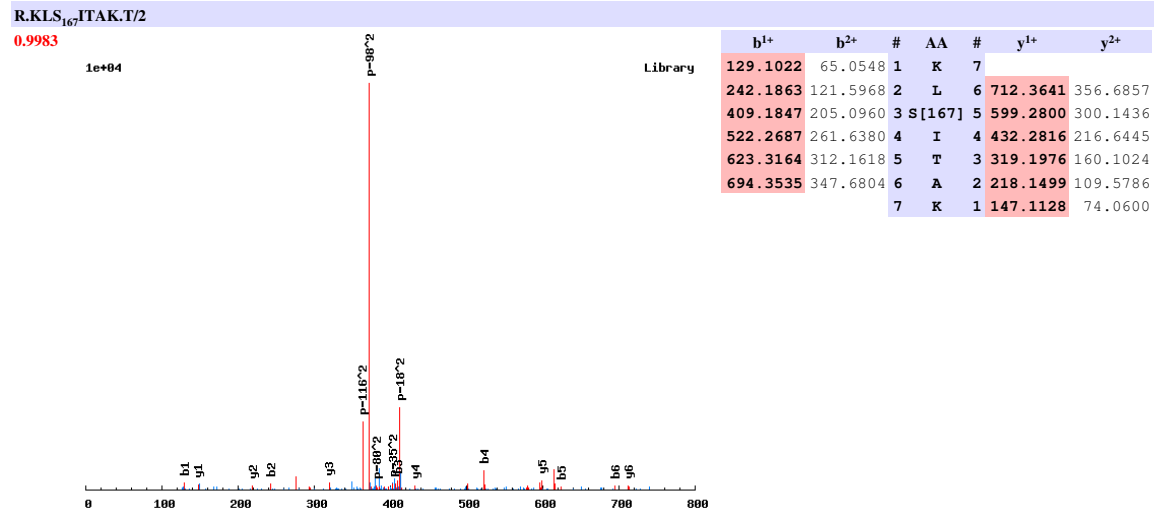

# Annotated spectra from Saleem et. al. 2009

K.K<sub>136</sub>LS<sub>167</sub>M<sub>147</sub>SQLR<sub>166</sub>S/2

0.7137

1e+04

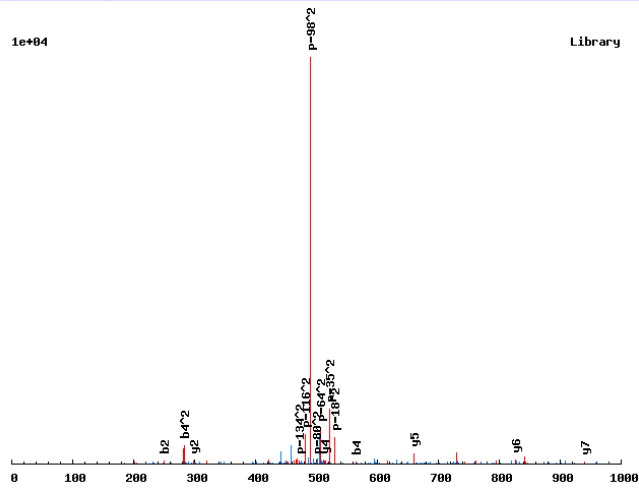

| Library | b <sup>1+</sup> | b <sup>2+</sup> | # | AA     | # | y <sup>1+</sup> | y <sup>2+</sup> |
|---------|-----------------|-----------------|---|--------|---|-----------------|-----------------|
|         | 137.1164        | 69.0619         | 1 | K[136] | 8 |                 |                 |
|         | 250.2005        | 125.6039        | 2 | L      | 7 | 940.4197        | 470.7135        |
|         | 417.1989        | 209.1031        | 3 | S[167] | 6 | 827.3357        | 414.1715        |
|         | 564.2343        | 282.6208        | 4 | M[147] | 5 | 660.3373        | 330.6723        |
|         | 651.2663        | 326.1368        | 5 | S      | 4 | 513.3019        | 257.1546        |
|         | 779.3249        | 390.1661        | 6 | Q      | 3 | 426.2699        | 213.6386        |
|         | 892.4089        | 446.7081        | 7 | L      | 2 | 298.2113        | 149.6093        |
|         |                 |                 | 8 | R[166] | 1 | 185.1272        | 93.0672         |



# Annotated spectra from Saleem et. al. 2009

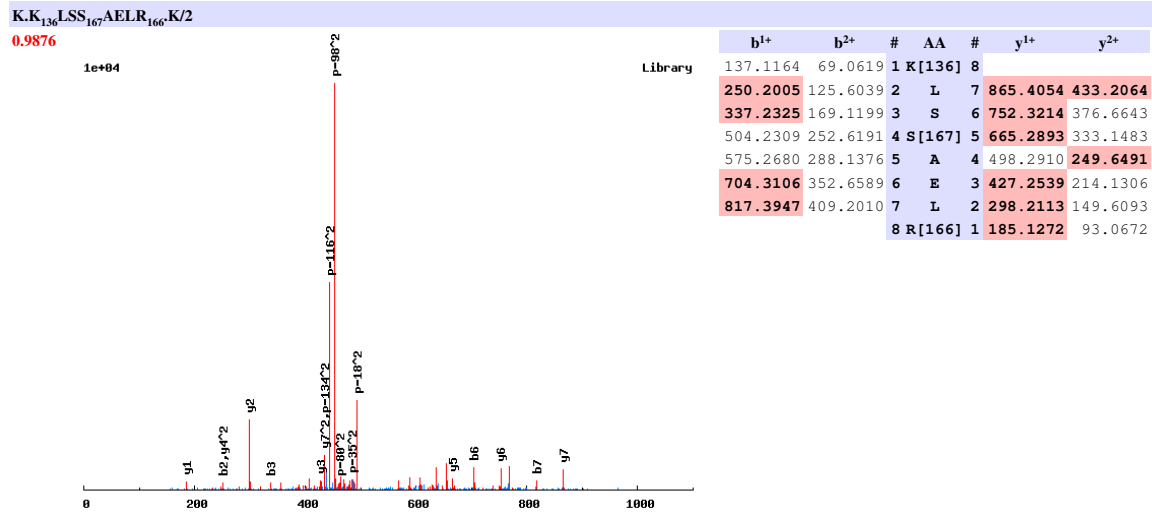

# Annotated spectra from Saleem et. al. 2009

K.KLS<sub>167</sub>-SDAIS<sub>167</sub>-ITQK.S/2

0.999

1e+04

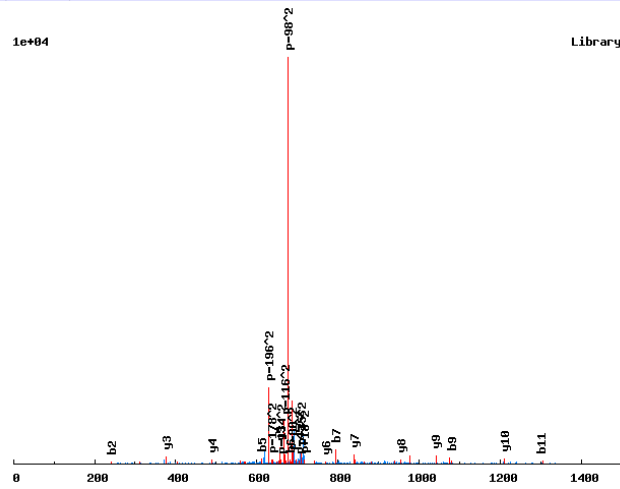

| Library | b <sup>1+</sup>  | b <sup>2+</sup> | #  | AA     | #  | y <sup>1+</sup> | y <sup>2+</sup> |
|---------|------------------|-----------------|----|--------|----|-----------------|-----------------|
|         | 129.1022         | 65.0548         | 1  | K      | 12 |                 |                 |
|         | <b>242.1863</b>  | 121.5968        | 2  | L      | 11 | 1322.5640       | 661.7857        |
|         | 409.1847         | 205.0960        | 3  | S[167] | 10 | 1209.4800       | 605.2436        |
|         | 496.2167         | 248.6120        | 4  | S      | 9  | 1042.4816       | 521.7445        |
|         | <b>611.2436</b>  | 306.1255        | 5  | D      | 8  | 955.4496        | 478.2284        |
|         | <b>682.2807</b>  | 341.6440        | 6  | A      | 7  | 840.4227        | 420.7150        |
|         | <b>795.3648</b>  | 398.1860        | 7  | I      | 6  | 769.3855        | 385.1964        |
|         | 962.3632         | 481.6852        | 8  | S[167] | 5  | 656.3015        | 328.6544        |
|         | <b>1075.4472</b> | 538.2273        | 9  | I      | 4  | 489.3031        | 245.1552        |
|         | 1176.4949        | 588.7511        | 10 | T      | 3  | 376.2191        | 188.6132        |
|         | <b>1304.5535</b> | 652.7804        | 11 | Q      | 2  | 275.1714        | 138.0893        |
|         |                  |                 | 12 | K      | 1  | 147.1128        | 74.0600         |

# Annotated spectra from Saleem et. al. 2009

K.K<sub>136</sub>LS<sub>167</sub>SHTAPIHS<sub>167</sub>PR<sub>166</sub>H/3

0.8026

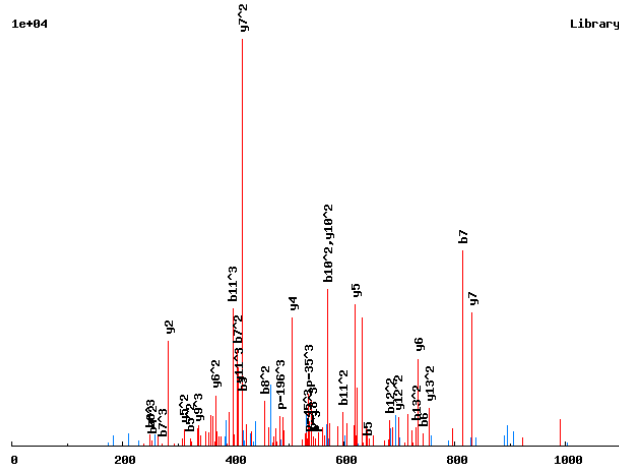

| Library | b <sup>1+</sup> | b <sup>2+</sup> | b <sup>3+</sup> | #  | AA     | #  | y <sup>1+</sup> | y <sup>2+</sup> | y <sup>3+</sup> |
|---------|-----------------|-----------------|-----------------|----|--------|----|-----------------|-----------------|-----------------|
|         | 137.1164        | 69.0619         | 46.3770         | 1  | K[136] | 14 |                 |                 |                 |
|         | 250.2005        | 125.6039        | 84.0717         | 2  | L      | 13 | 1505.6788       | 753.3431        | 502.5645        |
|         | 417.1989        | 209.1031        | 139.7378        | 3  | S[167] | 12 | 1392.5948       | 696.8010        | 464.8698        |
|         | 504.2309        | 252.6191        | 168.7485        | 4  | S      | 11 | 1225.5964       | 613.3018        | 409.2037        |
|         | 641.2898        | 321.1485        | 214.4348        | 5  | H      | 10 | 1138.5644       | 569.7858        | 380.1930        |
|         | 742.3375        | 371.6724        | 248.1173        | 6  | T      | 9  | 1001.5055       | 501.2564        | 334.5067        |
|         | 813.3746        | 407.1909        | 271.7964        | 7  | A      | 8  | 900.4578        | 450.7325        | 300.8241        |
|         | 910.4274        | 455.7173        | 304.1473        | 8  | P      | 7  | 829.4207        | 415.2140        | 277.1451        |
|         | 1023.5114       | 512.2593        | 341.8420        | 9  | I      | 6  | 732.3679        | 366.6876        | 244.7942        |
|         | 1136.5955       | 568.8014        | 379.5367        | 10 | I      | 5  | 619.2839        | 310.1456        | 207.0995        |
|         | 1193.6169       | 597.3121        | 398.5438        | 11 | G      | 4  | 506.1998        | 253.6035        | 169.4048        |
|         | 1360.6153       | 680.8113        | 454.2100        | 12 | S[167] | 3  | 449.1783        | 225.0928        | 150.3976        |
|         | 1457.6681       | 729.3377        | 486.5609        | 13 | P      | 2  | 282.1800        | 141.5936        | 94.7315         |
|         |                 |                 |                 | 14 | R[166] | 1  | 185.1272        | 93.0672         | 62.3806         |

# Annotated spectra from Saleem et. al. 2009

K.K<sub>136</sub>MPS<sub>167</sub>PAS<sub>167</sub>FK<sub>136</sub>S/2

0.8796

1e+04

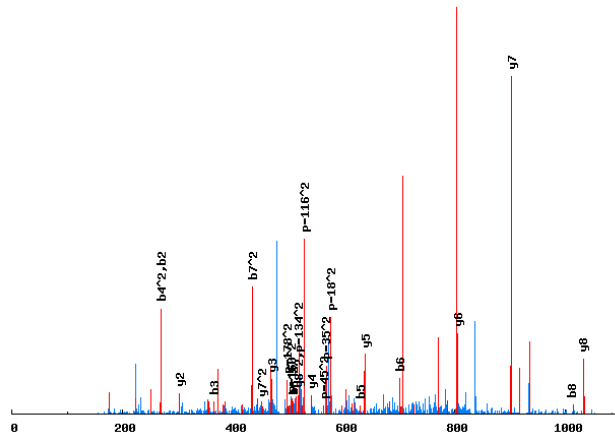

| Library | b <sup>1+</sup> | b <sup>2+</sup> | # | AA     | # | y <sup>1+</sup> | y <sup>2+</sup> |
|---------|-----------------|-----------------|---|--------|---|-----------------|-----------------|
|         | 137.1164        | 69.0619         | 1 | K[136] | 9 |                 |                 |
|         | 268.1569        | 134.5821        | 2 | M      | 8 | 1032.3753       | 516.6913        |
|         | 365.2097        | 183.1085        | 3 | P      | 7 | 901.3348        | 451.1710        |
|         | 532.2081        | 266.6077        | 4 | S[167] | 6 | 804.2820        | 402.6446        |
|         | 629.2608        | 315.1340        | 5 | P      | 5 | 637.2836        | 319.1455        |
|         | 700.2979        | 350.6526        | 6 | A      | 4 | 540.2309        | 270.6191        |
|         | 867.2963        | 434.1518        | 7 | S[167] | 3 | 469.1938        | 235.1005        |
|         | 1014.3647       | 507.6860        | 8 | F      | 2 | 302.1954        | 151.6013        |
|         |                 |                 | 9 | K[136] | 1 | 155.1270        | 78.0671         |

# Annotated spectra from Saleem et. al. 2009

K.KMPSPASFKS<sub>167</sub>SDSDS<sub>167</sub>S<sub>167</sub>IKEK.L/3

0.9769

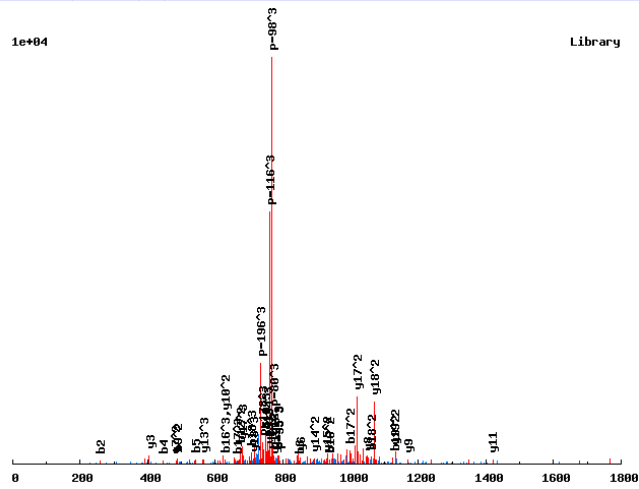

| Library | b <sup>1+</sup> | b <sup>2+</sup> | b <sup>3+</sup> | #  | AA     | #  | y <sup>1+</sup> | y <sup>2+</sup> | y <sup>3+</sup> |
|---------|-----------------|-----------------|-----------------|----|--------|----|-----------------|-----------------|-----------------|
|         | 129.1022        | 65.0548         | 43.7056         | 1  | K      | 20 |                 |                 |                 |
|         | 260.1427        | 130.5750        | 87.3858         | 2  | M      | 19 | 2267.8580       | 1134.4326       | 756.6242        |
|         | 357.1955        | 179.1014        | 119.7367        | 3  | P      | 18 | 2136.8175       | 1068.9124       | 712.9440        |
|         | 444.2275        | 222.6174        | 148.7474        | 4  | S      | 17 | 2039.7647       | 1020.3860       | 680.5931        |
|         | 541.2803        | 271.1438        | 181.0983        | 5  | P      | 16 | 1952.7327       | 976.8700        | 651.5824        |
|         | 612.3174        | 306.6623        | 204.7773        | 6  | A      | 15 | 1855.6799       | 928.3436        | 619.2315        |
|         | 699.3494        | 350.1784        | 233.7880        | 7  | S      | 14 | 1784.6428       | 892.8251        | 595.5525        |
|         | 846.4178        | 423.7126        | 282.8108        | 8  | F      | 13 | 1697.6108       | 849.3090        | 566.5418        |
|         | 974.5128        | 487.7600        | 325.5091        | 9  | K      | 12 | 1550.5424       | 775.7748        | 517.5190        |
|         | 1141.5112       | 571.2592        | 381.1752        | 10 | S[167] | 11 | 1422.4474       | 711.7274        | 474.8207        |
|         | 1228.5432       | 614.7752        | 410.1859        | 11 | S      | 10 | 1255.4491       | 628.2282        | 419.1545        |
|         | 1343.5701       | 672.2887        | 448.5282        | 12 | D      | 9  | 1168.4170       | 584.7122        | 390.1439        |
|         | 1430.6022       | 715.8047        | 477.5389        | 13 | S      | 8  | 1053.3901       | 527.1987        | 351.8016        |
|         | 1545.6291       | 773.3182        | 515.8812        | 14 | D      | 7  | 966.3581        | 483.6827        | 322.7909        |
|         | 1712.6275       | 856.8174        | 571.5473        | 15 | S[167] | 6  | 851.3311        | 426.1692        | 284.4486        |
|         | 1879.6258       | 940.3165        | 627.2135        | 16 | S[167] | 5  | 684.3328        | 342.6700        | 228.7824        |
|         | 1992.7099       | 996.8586        | 664.9081        | 17 | I      | 4  | 517.3344        | 259.1708        | 173.1163        |
|         | 2120.8048       | 1060.9061       | 707.6065        | 18 | K      | 3  | 404.2503        | 202.6288        | 135.4216        |
|         | 2249.8474       | 1125.4274       | 750.6207        | 19 | E      | 2  | 276.1554        | 138.5813        | 92.7233         |
|         |                 |                 |                 | 20 | K      | 1  | 147.1128        | 74.0600         | 49.7091         |

# Annotated spectra from Saleem et. al. 2009

K.KNDDS<sub>167</sub>ADERES<sub>167</sub>DNPIILTSNPK.M/3

0.9881

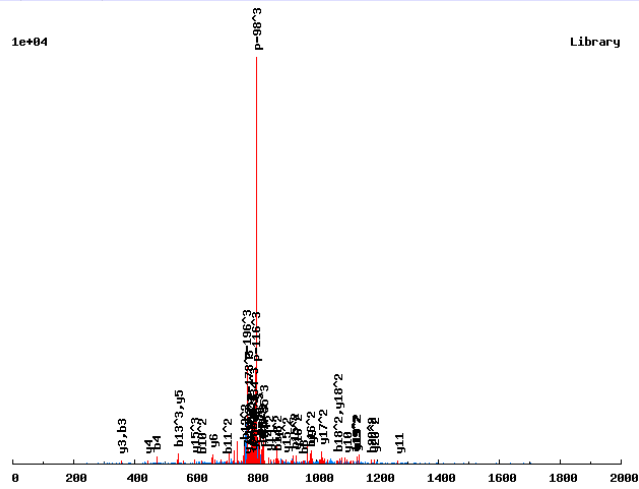

| Library | b <sup>1+</sup> | b <sup>2+</sup> | b <sup>3+</sup> | #  | AA     | #  | y <sup>1+</sup> | y <sup>2+</sup> | y <sup>3+</sup> |
|---------|-----------------|-----------------|-----------------|----|--------|----|-----------------|-----------------|-----------------|
|         | 129.1022        | 65.0548         | 43.7056         | 1  | K      | 21 |                 |                 |                 |
|         | 243.1452        | 122.0762        | 81.7199         | 2  | N      | 20 | 2376.9228       | 1188.9651       | 792.9791        |
|         | 358.1721        | 179.5897        | 120.0622        | 3  | D      | 19 | 2262.8799       | 1131.9436       | 754.9648        |
|         | 473.1990        | 237.1032        | 158.4045        | 4  | D      | 18 | 2147.8530       | 1074.4301       | 716.6225        |
|         | 640.1974        | 320.6023        | 214.0707        | 5  | S[167] | 17 | 2032.8260       | 1016.9166       | 678.2802        |
|         | 711.2345        | 356.1209        | 237.7497        | 6  | A      | 16 | 1865.8277       | 933.4175        | 622.6141        |
|         | 826.2615        | 413.6344        | 276.0920        | 7  | D      | 15 | 1794.7905       | 897.8989        | 598.9350        |
|         | 955.3041        | 478.1557        | 319.1062        | 8  | E      | 14 | 1679.7636       | 840.3854        | 560.5927        |
|         | 1111.4052       | 556.2062        | 371.1399        | 9  | R      | 13 | 1550.7210       | 775.8641        | 517.5785        |
|         | 1240.4478       | 620.7275        | 414.1541        | 10 | E      | 12 | 1394.6199       | 697.8136        | 465.5448        |
|         | 1407.4461       | 704.2267        | 469.8202        | 11 | S[167] | 11 | 1265.5773       | 633.2923        | 422.5306        |
|         | 1522.4731       | 761.7402        | 508.1625        | 12 | D      | 10 | 1098.5789       | 549.7931        | 366.8645        |
|         | 1636.5160       | 818.7616        | 546.1768        | 13 | N      | 9  | 983.5520        | 492.2796        | 328.5222        |
|         | 1733.5687       | 867.2880        | 578.5278        | 14 | P      | 8  | 869.5091        | 435.2582        | 290.5079        |
|         | 1846.6528       | 923.8300        | 616.2225        | 15 | I      | 7  | 772.4563        | 386.7318        | 258.1570        |
|         | 1959.7369       | 980.3721        | 653.9171        | 16 | L      | 6  | 659.3723        | 330.1898        | 220.4623        |
|         | 2060.7845       | 1030.8959       | 687.5997        | 17 | T      | 5  | 546.2882        | 273.6477        | 182.7676        |
|         | 2147.8166       | 1074.4119       | 716.6104        | 18 | S      | 4  | 445.2405        | 223.1239        | 149.0850        |
|         | 2261.8595       | 1131.4334       | 754.6247        | 19 | N      | 3  | 358.2085        | 179.6079        | 120.0743        |
|         | 2358.9123       | 1179.9598       | 786.9756        | 20 | P      | 2  | 244.1656        | 122.5864        | 82.0600         |
|         |                 |                 |                 | 21 | K      | 1  | 147.1128        | 74.0600         | 49.7091         |

### Annotated spectra from Saleem et. al. 2009

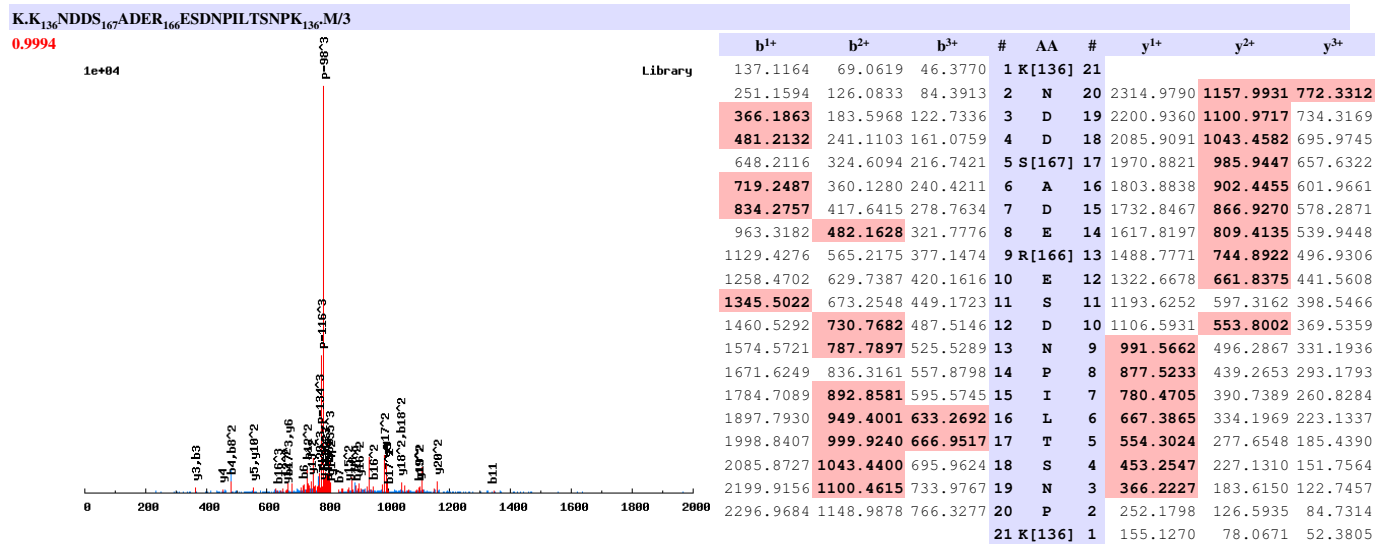

# Annotated spectra from Saleem et. al. 2009

K.K<sub>136</sub>NDTYTDLAS<sub>167</sub>IAS<sub>167</sub>GR<sub>166</sub>D.-/2

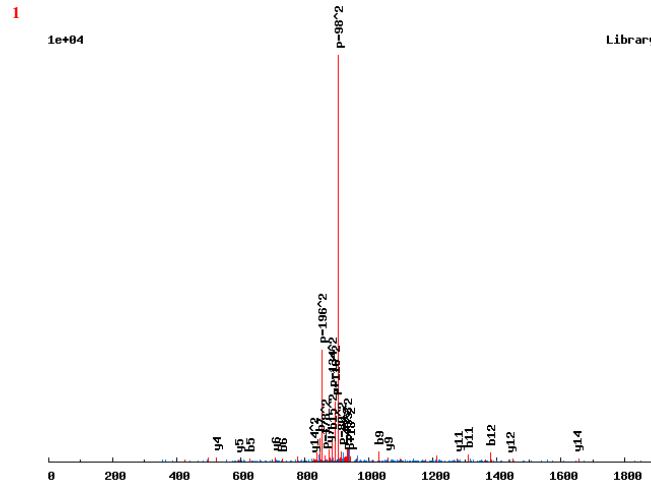

| Library | b <sup>1+</sup> | b <sup>2+</sup> | #  | AA | #  | y <sup>1+</sup> | y <sup>2+</sup> |
|---------|-----------------|-----------------|----|----|----|-----------------|-----------------|
|         | 137.1164        | 69.0619         | 1  | K  | 16 |                 |                 |
|         | 251.1594        | 126.0833        | 2  | N  | 15 | 1768.6702       | 884.8387        |
|         | 366.1863        | 183.5968        | 3  | D  | 14 | 1654.6273       | 827.8173        |
|         | 467.2340        | 234.1206        | 4  | T  | 13 | 1539.6003       | 770.3038        |
|         | 630.2973        | 315.6523        | 5  | Y  | 12 | 1438.5526       | 719.7800        |
|         | 731.3450        | 366.1761        | 6  | T  | 11 | 1275.4893       | 638.2483        |
|         | 846.3719        | 423.6896        | 7  | D  | 10 | 1174.4416       | 587.7245        |
|         | 959.4560        | 480.2316        | 8  | L  | 9  | 1059.4147       | 530.2110        |
|         | 1030.4931       | 515.7502        | 9  | A  | 8  | 946.3306        | 473.6690        |
|         | 1197.4915       | 599.2494        | 10 | S  | 7  | 875.2935        | 438.1504        |
|         | 1310.5755       | 655.7914        | 11 | I  | 6  | 708.2952        | 354.6512        |
|         | 1381.6126       | 691.3100        | 12 | A  | 5  | 595.2111        | 298.1092        |
|         | 1548.6110       | 774.8091        | 13 | S  | 4  | 524.1740        | 262.5906        |
|         | 1605.6325       | 803.3199        | 14 | G  | 3  | 357.1756        | 179.0914        |
|         | 1771.7418       | 886.3746        | 15 | R  | 2  | 300.1542        | 150.5807        |
|         |                 |                 | 16 | D  | 1  | 134.0448        | 67.5260         |



# Annotated spectra from Saleem et. al. 2009

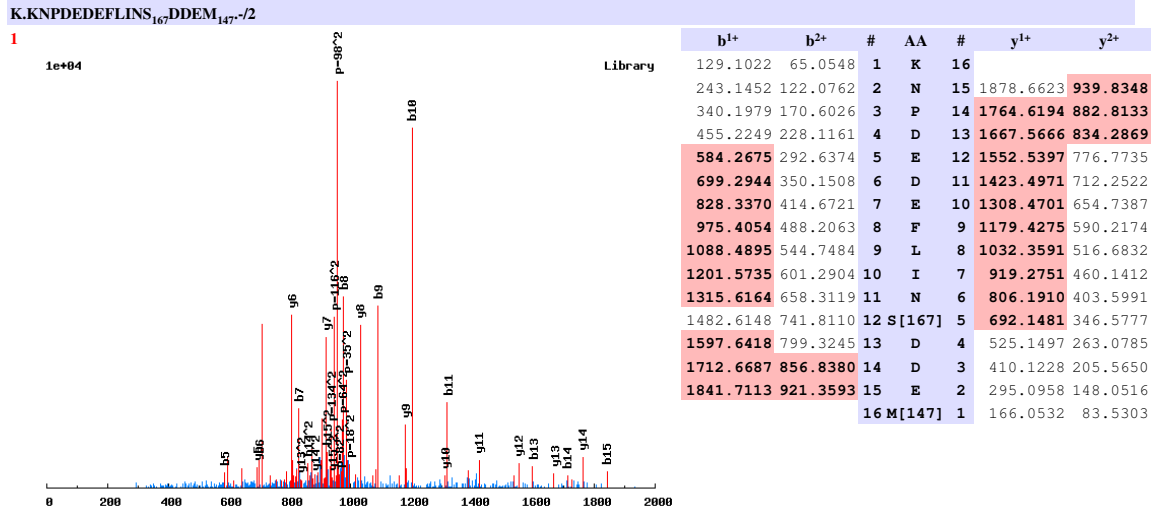

# Annotated spectra from Saleem et. al. 2009

R.K<sub>136</sub>NS<sub>167</sub>HLFPQR<sub>166</sub>K/3

0.9789

1e+04

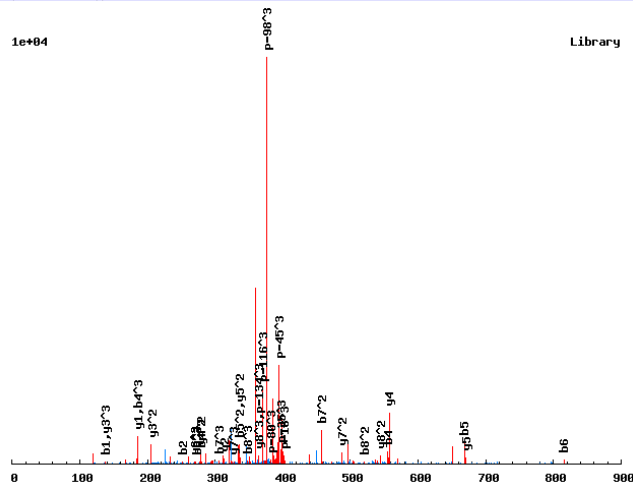

| Library | b <sup>1+</sup> | b <sup>2+</sup> | b <sup>3+</sup> | # | AA     | # | y <sup>1+</sup> | y <sup>2+</sup> | y <sup>3+</sup> |
|---------|-----------------|-----------------|-----------------|---|--------|---|-----------------|-----------------|-----------------|
|         | 137.1164        | 69.0619         | 46.3770         | 1 | K[136] | 9 |                 |                 |                 |
|         | 251.1594        | 126.0833        | 84.3913         | 2 | N      | 8 | 1088.4912       | 544.7493        | 363.5019        |
|         | 418.1577        | 209.5825        | 140.0574        | 3 | S[167] | 7 | 974.4483        | 487.7278        | 325.4876        |
|         | 555.2166        | 278.1120        | 185.7437        | 4 | H      | 6 | 807.4499        | 404.2286        | 269.8215        |
|         | 668.3007        | 334.6540        | 223.4384        | 5 | L      | 5 | 670.3910        | 335.6992        | 224.1352        |
|         | 815.3691        | 408.1882        | 272.4612        | 6 | F      | 4 | 557.3070        | 279.1571        | 186.4405        |
|         | 912.4219        | 456.7146        | 304.8121        | 7 | P      | 3 | 410.2386        | 205.6229        | 137.4177        |
|         | 1040.4805       | 520.7439        | 347.4983        | 8 | Q      | 2 | 313.1858        | 157.0965        | 105.0668        |
|         |                 |                 |                 | 9 | R[166] | 1 | 185.1272        | 93.0672         | 62.3806         |

# Annotated spectra from Saleem et. al. 2009

R.KNS<sub>167</sub>-LSLL-/-2

0.9838

1e+04

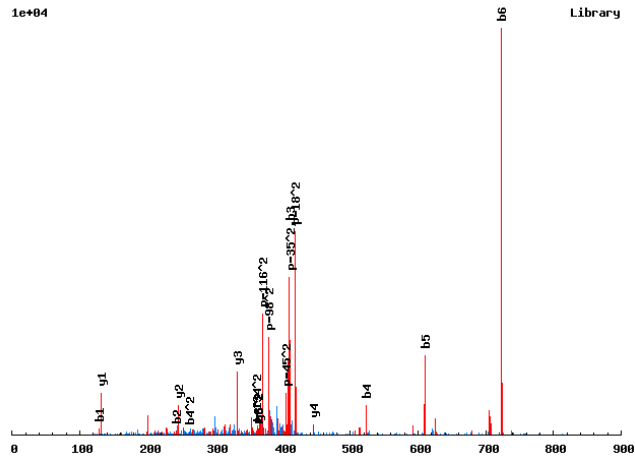

Library

| b <sup>1+</sup> | b <sup>2+</sup> | # | AA     | # | y <sup>1+</sup> | y <sup>2+</sup> |
|-----------------|-----------------|---|--------|---|-----------------|-----------------|
| 129.1022        | 65.0548         | 1 | K      | 7 |                 |                 |
| 243.1452        | 122.0762        | 2 | N      | 6 | 726.3433        | 363.6753        |
| 410.1435        | 205.5754        | 3 | S[167] | 5 | 612.3004        | 306.6538        |
| 523.2276        | 262.1174        | 4 | L      | 4 | 445.3021        | 223.1547        |
| 610.2596        | 305.6335        | 5 | S      | 3 | 332.2180        | 166.6126        |
| 723.3437        | 362.1755        | 6 | L      | 2 | 245.1860        | 123.0966        |
|                 |                 | 7 | L      | 1 | 132.1019        | 66.5546         |

# Annotated spectra from Saleem et. al. 2009

R.KNS<sub>167</sub>NLS<sub>167</sub>PTQIEL-/-2

0.9376

1e+04

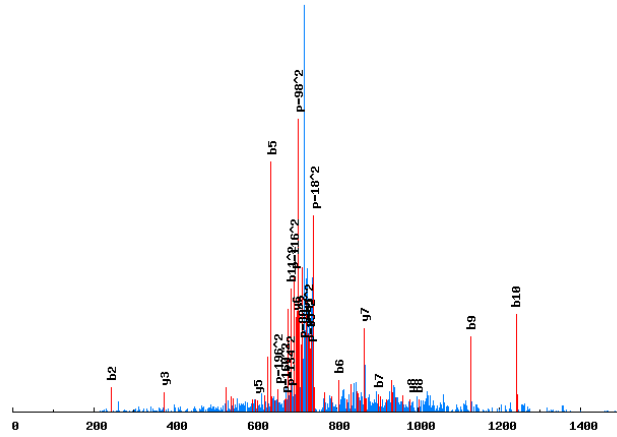

| Library | b <sup>1+</sup>  | b <sup>2+</sup> | #  | AA     | #  | y <sup>1+</sup> | y <sup>2+</sup> |
|---------|------------------|-----------------|----|--------|----|-----------------|-----------------|
|         | 129.1022         | 65.0548         | 1  | K      | 12 |                 |                 |
|         | <b>243.1452</b>  | 122.0762        | 2  | N      | 11 | 1375.5542       | 688.2807        |
|         | 410.1435         | 205.5754        | 3  | S[167] | 10 | 1261.5113       | 631.2593        |
|         | 524.1865         | 262.5969        | 4  | N      | 9  | 1094.5129       | 547.7601        |
|         | <b>637.2705</b>  | 319.1389        | 5  | L      | 8  | <b>980.4700</b> | 490.7386        |
|         | <b>804.2689</b>  | 402.6381        | 6  | S[167] | 7  | <b>867.3859</b> | 434.1966        |
|         | <b>901.3216</b>  | 451.1645        | 7  | P      | 6  | <b>700.3876</b> | 350.6974        |
|         | <b>1002.3693</b> | 501.6883        | 8  | T      | 5  | <b>603.3348</b> | 302.1710        |
|         | <b>1130.4279</b> | 565.7176        | 9  | Q      | 4  | 502.2871        | 251.6472        |
|         | <b>1243.5120</b> | 622.2596        | 10 | I      | 3  | <b>374.2285</b> | 187.6179        |
|         | 1372.5546        | <b>686.7809</b> | 11 | E      | 2  | 261.1445        | 131.0759        |
|         |                  |                 | 12 | L      | 1  | 132.1019        | 66.5546         |

# Annotated spectra from Saleem et. al. 2009

K.KNS<sub>167</sub>T<sub>181</sub>FVLDPKPPK.N/3

0.9994

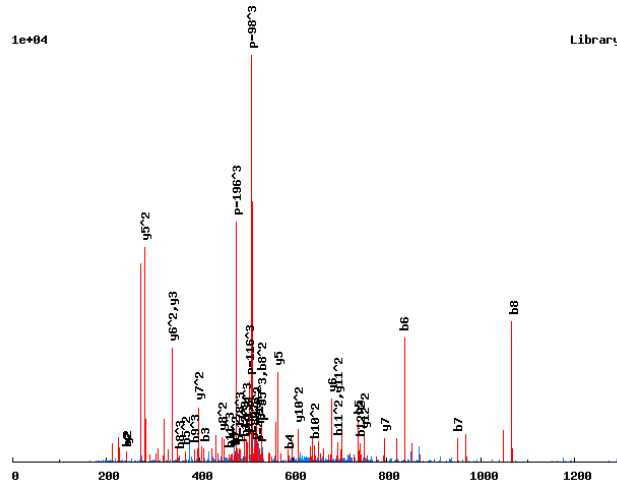

| Library | b <sup>1+</sup>  | b <sup>2+</sup> | b <sup>3+</sup> | #  | AA      | #  | y <sup>1+</sup> | y <sup>2+</sup> | y <sup>3+</sup> |
|---------|------------------|-----------------|-----------------|----|---------|----|-----------------|-----------------|-----------------|
|         | 129.1022         | 65.0548         | 43.7056         | 1  | K       | 13 |                 |                 |                 |
|         | <b>243.1452</b>  | 122.0762        | 81.7199         | 2  | N       | 12 | 1502.6692       | <b>751.8382</b> | <b>501.5612</b> |
|         | 410.1435         | 205.5754        | 137.3860        | 3  | S [167] | 11 | 1388.6262       | 694.8168        | 463.5469        |
|         | 591.1575         | 296.0824        | 197.7240        | 4  | T [181] | 10 | 1221.6279       | 611.3176        | 407.8808        |
|         | 738.2260         | <b>369.6166</b> | 246.7468        | 5  | F       | 9  | 1040.6139       | <b>520.8106</b> | 347.5428        |
|         | 837.2944         | 419.1508        | 279.7696        | 6  | V       | 8  | 893.5455        | <b>447.2764</b> | 298.5200        |
|         | 950.3784         | <b>475.6929</b> | 317.4643        | 7  | L       | 7  | <b>794.4770</b> | <b>397.7422</b> | 265.4972        |
|         | <b>1065.4054</b> | <b>533.2063</b> | <b>355.8066</b> | 8  | D       | 6  | <b>681.3930</b> | <b>341.2001</b> | 227.8025        |
|         | 1162.4581        | 581.7327        | <b>388.1576</b> | 9  | P       | 5  | <b>566.3660</b> | <b>283.6867</b> | 189.4602        |
|         | 1290.5531        | <b>645.7802</b> | 430.8559        | 10 | K       | 4  | <b>469.3133</b> | 235.1603        | 157.1093        |
|         | 1387.6058        | <b>694.3066</b> | <b>463.2068</b> | 11 | P       | 3  | <b>341.2183</b> | 171.1128        | 114.4110        |
|         | 1484.6586        | <b>742.8329</b> | <b>495.5577</b> | 12 | P       | 2  | <b>244.1656</b> | 122.5864        | 82.0600         |
|         |                  |                 |                 | 13 | K       | 1  | 147.1128        | 74.0600         | 49.7091         |

# Annotated spectra from Saleem et. al. 2009

R.KPAS<sub>167</sub>FLNDVEEEES<sub>167</sub>PVKPLK.I/3

0.9378

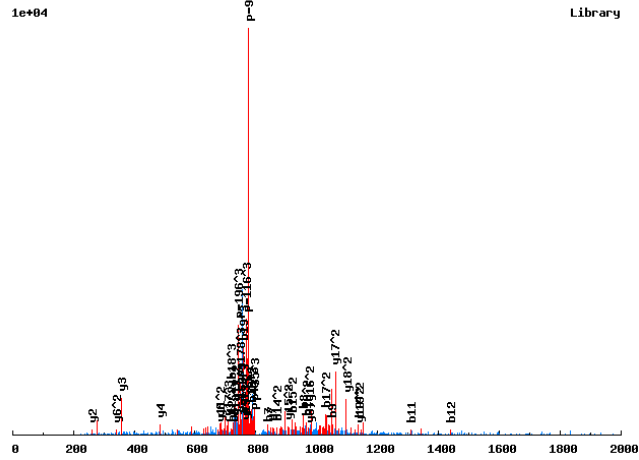

| Library | b <sup>1+</sup> | b <sup>2+</sup> | b <sup>3+</sup> | #  | AA     | #  | y <sup>1+</sup> | y <sup>2+</sup> | y <sup>3+</sup> |
|---------|-----------------|-----------------|-----------------|----|--------|----|-----------------|-----------------|-----------------|
|         | 129.1022        | 65.0548         | 43.7056         | 1  | K      | 20 |                 |                 |                 |
|         | 226.1550        | 113.5811        | 76.0565         | 2  | P      | 19 | 2288.0135       | 1144.5104       | 763.3427        |
|         | 297.1921        | 149.0997        | 99.7356         | 3  | A      | 18 | 2190.9607       | 1095.9840       | 730.9918        |
|         | 464.1905        | 232.5989        | 155.4017        | 4  | S[167] | 17 | 2119.9236       | 1060.4654       | 707.3127        |
|         | 611.2589        | 306.1331        | 204.4245        | 5  | F      | 16 | 1952.9252       | 976.9663        | 651.6466        |
|         | 724.3429        | 362.6751        | 242.1192        | 6  | L      | 15 | 1805.8568       | 903.4320        | 602.6238        |
|         | 838.3859        | 419.6966        | 280.1335        | 7  | N      | 14 | 1692.7728       | 846.8900        | 564.9291        |
|         | 953.4128        | 477.2100        | 318.4758        | 8  | D      | 13 | 1578.7298       | 789.8686        | 526.9148        |
|         | 1052.4812       | 526.7443        | 351.4986        | 9  | V      | 12 | 1463.7029       | 732.3551        | 488.5725        |
|         | 1181.5238       | 591.2655        | 394.5128        | 10 | E      | 11 | 1364.6345       | 682.8209        | 455.5497        |
|         | 1310.5664       | 655.7868        | 437.5270        | 11 | E      | 10 | 1235.5919       | 618.2996        | 412.5355        |
|         | 1439.6090       | 720.3081        | 480.5412        | 12 | E      | 9  | 1106.5493       | 553.7783        | 369.5213        |
|         | 1568.6516       | 784.8294        | 523.5554        | 13 | E      | 8  | 977.5067        | 489.2570        | 326.5071        |
|         | 1735.6499       | 868.3286        | 579.2215        | 14 | S[167] | 7  | 848.4641        | 424.7357        | 283.4929        |
|         | 1832.7027       | 916.8550        | 611.5724        | 15 | P      | 6  | 681.4658        | 341.2365        | 227.8268        |
|         | 1931.7711       | 966.3892        | 644.5952        | 16 | V      | 5  | 584.4130        | 292.7101        | 195.4759        |
|         | 2059.8661       | 1030.4367       | 687.2935        | 17 | K      | 4  | 485.3446        | 243.1759        | 162.4530        |
|         | 2156.9188       | 1078.9631       | 719.6445        | 18 | P      | 3  | 357.2496        | 179.1284        | 119.7547        |
|         | 2270.0029       | 1135.5051       | 757.3392        | 19 | L      | 2  | 260.1969        | 130.6021        | 87.4038         |
|         |                 |                 |                 | 20 | K      | 1  | 147.1128        | 74.0600         | 49.7091         |

Annotated spectra from Saleem et. al. 2009

K.KPILAVPEPALADT<sub>181</sub>HSEEIS<sub>167</sub>R/S/3

0.6985

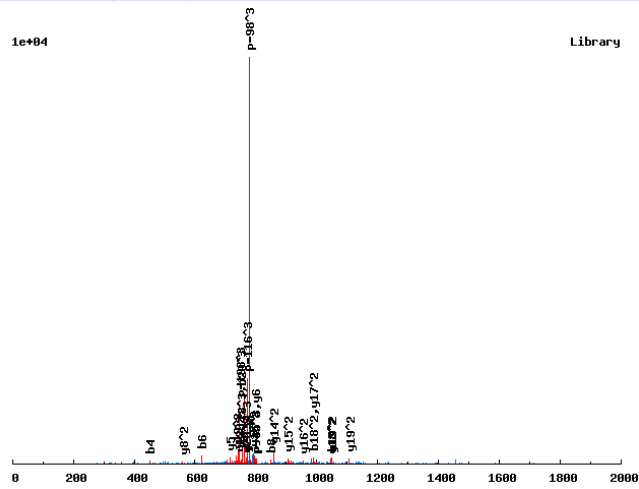

| Library | b <sup>1+</sup> | b <sup>2+</sup> | b <sup>3+</sup> | #  | AA     | #  | y <sup>1+</sup> | y <sup>2+</sup> | y <sup>3+</sup> |
|---------|-----------------|-----------------|-----------------|----|--------|----|-----------------|-----------------|-----------------|
|         | 129.1022        | 65.0548         | 43.7056         | 1  | K      | 21 |                 |                 |                 |
|         | 226.1550        | 113.5811        | 76.0565         | 2  | P      | 20 | 2305.0512       | 1153.0293       | 769.0219        |
|         | 339.2391        | 170.1232        | 113.7512        | 3  | I      | 19 | 2207.9985       | 1104.5029       | 736.6710        |
|         | 452.3231        | 226.6652        | 151.4459        | 4  | L      | 18 | 2094.9144       | 1047.9608       | 698.9763        |
|         | 523.3602        | 262.1838        | 175.1249        | 5  | A      | 17 | 1981.8304       | 991.4188        | 661.2816        |
|         | 622.4286        | 311.7180        | 208.1477        | 6  | V      | 16 | 1910.7932       | 955.9003        | 637.6026        |
|         | 719.4814        | 360.2443        | 240.4987        | 7  | P      | 15 | 1811.7248       | 906.3661        | 604.5798        |
|         | 848.5240        | 424.7656        | 283.5129        | 8  | E      | 14 | 1714.6721       | 857.8397        | 572.2289        |
|         | 945.5768        | 473.2920        | 315.8638        | 9  | P      | 13 | 1585.6295       | 793.3184        | 529.2147        |
|         | 1016.6139       | 508.8106        | 339.5428        | 10 | A      | 12 | 1488.5767       | 744.7920        | 496.8638        |
|         | 1129.6979       | 565.3526        | 377.2375        | 11 | L      | 11 | 1417.5396       | 709.2734        | 473.1847        |
|         | 1200.7350       | 600.8712        | 400.9165        | 12 | A      | 10 | 1304.4556       | 652.7314        | 435.4900        |
|         | 1315.7620       | 658.3846        | 439.2588        | 13 | D      | 9  | 1233.4184       | 617.2129        | 411.8110        |
|         | 1496.7760       | 748.8916        | 499.5968        | 14 | T[181] | 8  | 1118.3915       | 559.6994        | 373.4687        |
|         | 1633.8349       | 817.4211        | 545.2832        | 15 | H      | 7  | 937.3775        | 469.1924        | 313.1307        |
|         | 1720.8669       | 860.9371        | 574.2938        | 16 | S      | 6  | 800.3186        | 400.6629        | 267.4444        |
|         | 1849.9095       | 925.4584        | 617.3080        | 17 | E      | 5  | 713.2866        | 357.1469        | 238.4337        |
|         | 1978.9521       | 989.9797        | 660.3222        | 18 | E      | 4  | 584.2440        | 292.6256        | 195.4195        |
|         | 2092.0362       | 1046.5217       | 698.0169        | 19 | I      | 3  | 455.2014        | 228.1043        | 152.4053        |
|         | 2259.0345       | 1130.0209       | 753.6830        | 20 | S[167] | 2  | 342.1173        | 171.5623        | 114.7106        |
|         |                 |                 |                 | 21 | R      | 1  | 175.1190        | 88.0631         | 59.0445         |

# Annotated spectra from Saleem et. al. 2009

K.KPSIGGDKS<sub>167</sub>EEDGEGEDDKS<sub>167</sub>EETVEETR.S/3

0.9933

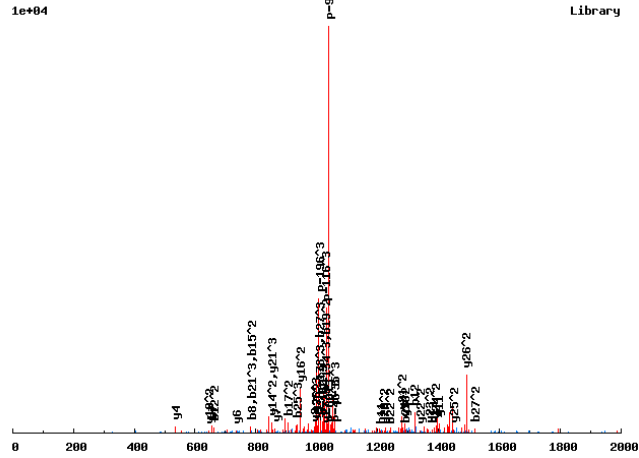

| Library | b <sup>1+</sup> | b <sup>2+</sup> | b <sup>3+</sup> | #  | AA     | #  | y <sup>1+</sup> | y <sup>2+</sup> | y <sup>3+</sup> |
|---------|-----------------|-----------------|-----------------|----|--------|----|-----------------|-----------------|-----------------|
|         | 129.1022        | 65.0548         | 43.7056         | 1  | K      | 28 |                 |                 |                 |
|         | 226.1550        | 113.5811        | 76.0565         | 2  | P      | 27 | 3084.1725       | 1542.5899       | 1028.7290       |
|         | 313.1870        | 157.0972        | 105.0672        | 3  | S      | 26 | 2987.1198       | 1494.0635       | 996.3781        |
|         | 426.2711        | 213.6392        | 142.7619        | 4  | I      | 25 | 2900.0877       | 1450.5475       | 967.3674        |
|         | 483.2926        | 242.1499        | 161.7690        | 5  | G      | 24 | 2787.0037       | 1394.0055       | 929.6727        |
|         | 540.3140        | 270.6606        | 180.7762        | 6  | G      | 23 | 2729.9822       | 1365.4948       | 910.6656        |
|         | 655.3410        | 328.1741        | 219.1185        | 7  | D      | 22 | 2672.9608       | 1336.9840       | 891.6584        |
|         | 783.4359        | 392.2216        | 261.8168        | 8  | K      | 21 | 2557.9338       | 1279.4706       | 853.3161        |
|         | 950.4343        | 475.7208        | 317.4829        | 9  | S[167] | 20 | 2429.8389       | 1215.4231       | 810.6178        |
|         | 1079.4769       | 540.2421        | 360.4971        | 10 | E      | 19 | 2262.8405       | 1131.9239       | 754.9517        |
|         | 1208.5195       | 604.7634        | 403.5113        | 11 | E      | 18 | 2133.7979       | 1067.4026       | 711.9375        |
|         | 1323.5464       | 662.2768        | 441.8537        | 12 | D      | 17 | 2004.7553       | 1002.8813       | 668.9233        |
|         | 1380.5679       | 690.7876        | 460.8608        | 13 | G      | 16 | 1889.7284       | 945.3678        | 630.5810        |
|         | 1509.6104       | 755.3089        | 503.8750        | 14 | E      | 15 | 1832.7069       | 916.8571        | 611.5738        |
|         | 1566.6319       | 783.8196        | 522.8822        | 15 | G      | 14 | 1703.6643       | 852.3358        | 568.5596        |
|         | 1695.6745       | 848.3409        | 565.8964        | 16 | E      | 13 | 1646.6429       | 823.8251        | 549.5525        |
|         | 1810.7014       | 905.8544        | 604.2387        | 17 | D      | 12 | 1517.6003       | 759.3038        | 506.5383        |
|         | 1925.7284       | 963.3678        | 642.5810        | 18 | D      | 11 | 1402.5733       | 701.7903        | 468.1960        |
|         | 2053.8233       | 1027.4153       | 685.2793        | 19 | K      | 10 | 1287.5464       | 644.2768        | 429.8537        |
|         | 2220.8217       | 1110.9145       | 740.9454        | 20 | S[167] | 9  | 1159.4514       | 580.2294        | 387.1553        |
|         | 2349.8643       | 1175.4358       | 783.9596        | 21 | E      | 8  | 992.4531        | 496.7302        | 331.4892        |
|         | 2478.9069       | 1239.9571       | 826.9738        | 22 | E      | 7  | 863.4105        | 432.2089        | 288.4750        |
|         | 2579.9546       | 1290.4809       | 860.6564        | 23 | T      | 6  | 734.3679        | 367.6876        | 245.4608        |
|         | 2679.0230       | 1340.0151       | 893.6792        | 24 | V      | 5  | 633.3202        | 317.1638        | 211.7783        |
|         | 2808.0656       | 1404.5364       | 936.6934        | 25 | E      | 4  | 534.2518        | 267.6295        | 178.7555        |
|         | 2937.1081       | 1469.0577       | 979.7076        | 26 | E      | 3  | 405.2092        | 203.1082        | 135.7413        |
|         | 3038.1558       | 1519.5816       | 1013.3901       | 27 | T      | 2  | 276.1666        | 138.5870        | 92.7271         |
|         |                 |                 |                 | 28 | R      | 1  | 175.1190        | 88.0631         | 59.0445         |



# Annotated spectra from Saleem et. al. 2009

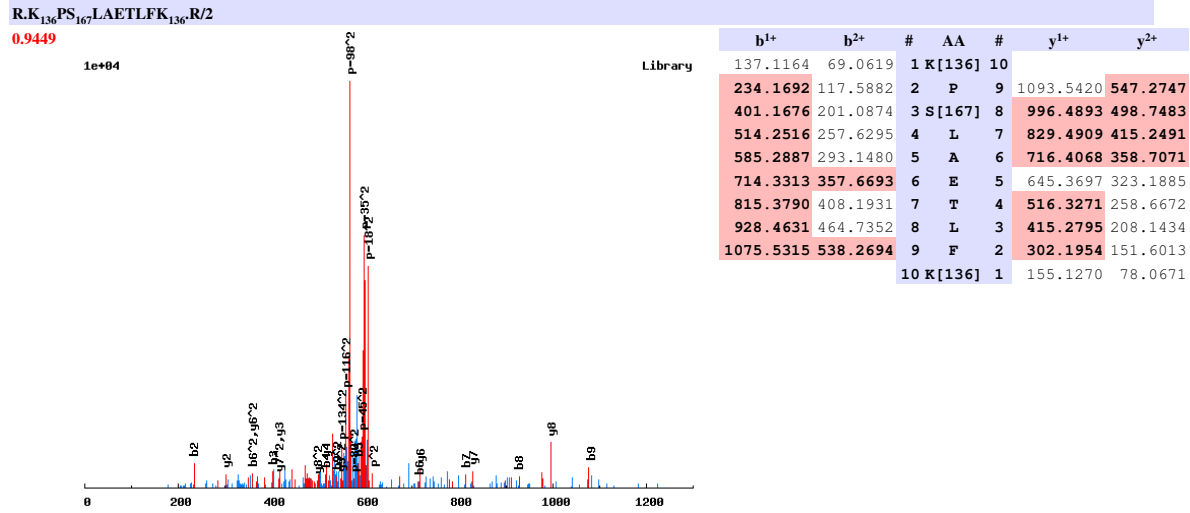

# Annotated spectra from Saleem et. al. 2009

R.KPSSSPS<sub>167</sub>S<sub>167</sub>KAPS<sub>167</sub>PGVNT.-/2

0.7556

1e+04

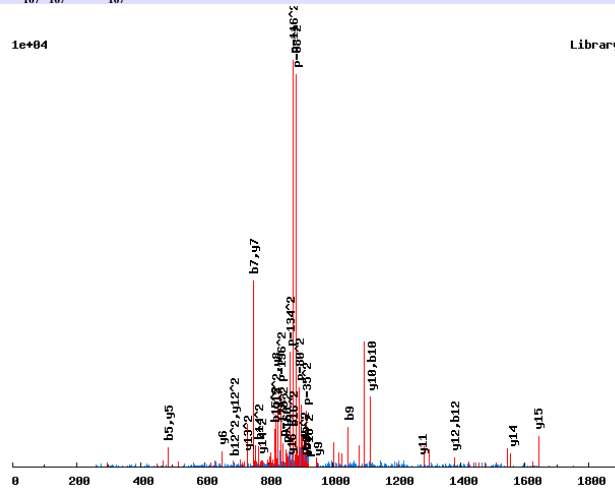

| Library | b <sup>1+</sup> | b <sup>2+</sup> | #  | AA     | #  | y <sup>1+</sup> | y <sup>2+</sup> |
|---------|-----------------|-----------------|----|--------|----|-----------------|-----------------|
|         | 129.1022        | 65.0548         | 1  | K      | 17 |                 |                 |
|         | 226.1550        | 113.5811        | 2  | P      | 16 | 1739.6326       | 870.3199        |
|         | 313.1870        | 157.0972        | 3  | S      | 15 | 1642.5798       | 821.7936        |
|         | 400.2191        | 200.6132        | 4  | S      | 14 | 1555.5478       | 778.2775        |
|         | 487.2511        | 244.1292        | 5  | S      | 13 | 1468.5158       | 734.7615        |
|         | 584.3039        | 292.6556        | 6  | P      | 12 | 1381.4838       | 691.2455        |
|         | 751.3022        | 376.1547        | 7  | S[167] | 11 | 1284.4310       | 642.7191        |
|         | 918.3006        | 459.6539        | 8  | S[167] | 10 | 1117.4326       | 559.2200        |
|         | 1046.3955       | 523.7014        | 9  | K      | 9  | 950.4343        | 475.7208        |
|         | 1117.4326       | 559.2200        | 10 | A      | 8  | 822.3393        | 411.6733        |
|         | 1214.4854       | 607.7463        | 11 | P      | 7  | 751.3022        | 376.1547        |
|         | 1381.4838       | 691.2455        | 12 | S[167] | 6  | 654.2494        | 327.6284        |
|         | 1478.5365       | 739.7719        | 13 | P      | 5  | 487.2511        | 244.1292        |
|         | 1535.5580       | 768.2826        | 14 | G      | 4  | 390.1983        | 195.6028        |
|         | 1634.6264       | 817.8168        | 15 | V      | 3  | 333.1769        | 167.0921        |
|         | 1748.6693       | 874.8383        | 16 | N      | 2  | 234.1085        | 117.5579        |
|         |                 |                 | 17 | T      | 1  | 120.0655        | 60.5364         |

# Annotated spectra from Saleem et. al. 2009

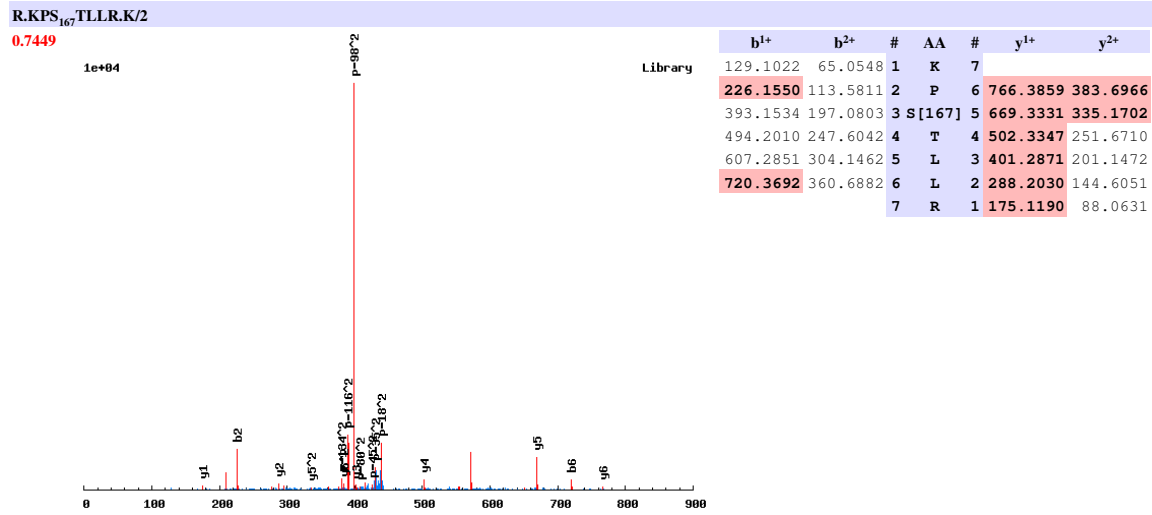

# Annotated spectra from Saleem et. al. 2009

K.K<sub>136</sub>PT<sub>181</sub>PLPSLK<sub>136</sub>D/2

0.949

1e+04

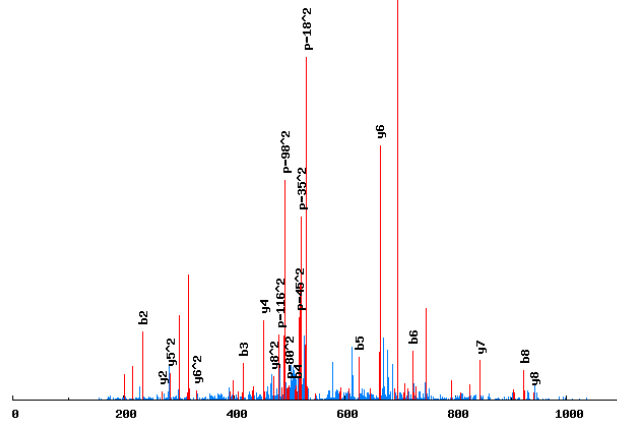

| Library | b <sup>1+</sup> | b <sup>2+</sup> | # | AA     | # | y <sup>1+</sup> | y <sup>2+</sup> |
|---------|-----------------|-----------------|---|--------|---|-----------------|-----------------|
|         | 137.1164        | 69.0619         | 1 | K[136] | 9 |                 |                 |
|         | 234.1692        | 117.5882        | 2 | P      | 8 | 940.4994        | 470.7534        |
|         | 415.1832        | 208.0952        | 3 | T[181] | 7 | 843.4467        | 422.2270        |
|         | 512.2360        | 256.6216        | 4 | P      | 6 | 662.4327        | 331.7200        |
|         | 625.3200        | 313.1637        | 5 | L      | 5 | 565.3799        | 283.1936        |
|         | 722.3728        | 361.6900        | 6 | P      | 4 | 452.2958        | 226.6516        |
|         | 809.4048        | 405.2061        | 7 | S      | 3 | 355.2431        | 178.1252        |
|         | 922.4889        | 461.7481        | 8 | L      | 2 | 268.2111        | 134.6092        |
|         |                 |                 | 9 | K[136] | 1 | 155.1270        | 78.0671         |

# Annotated spectra from Saleem et. al. 2009

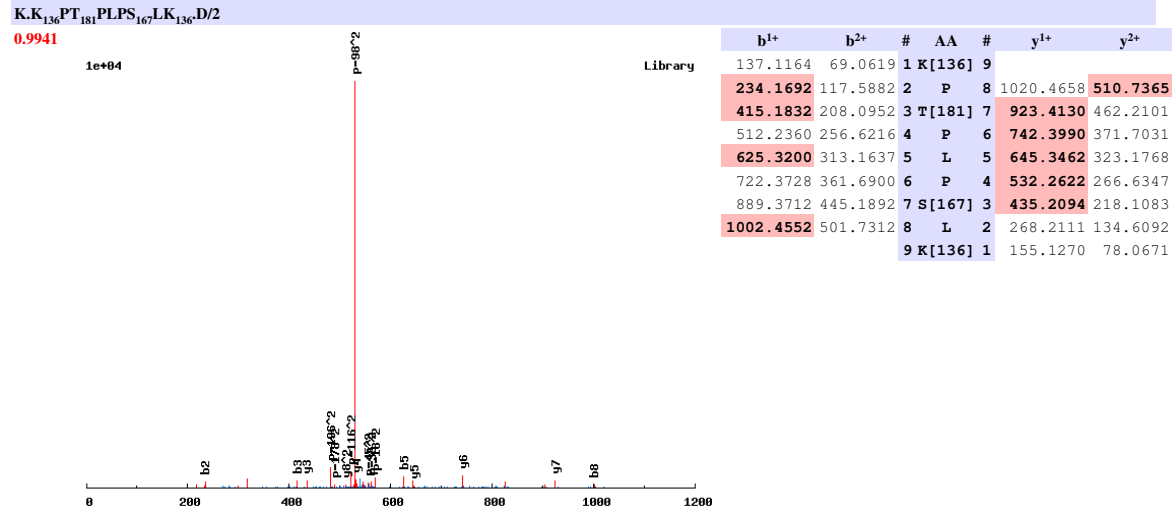

Annotated spectra from Saleem et. al. 2009

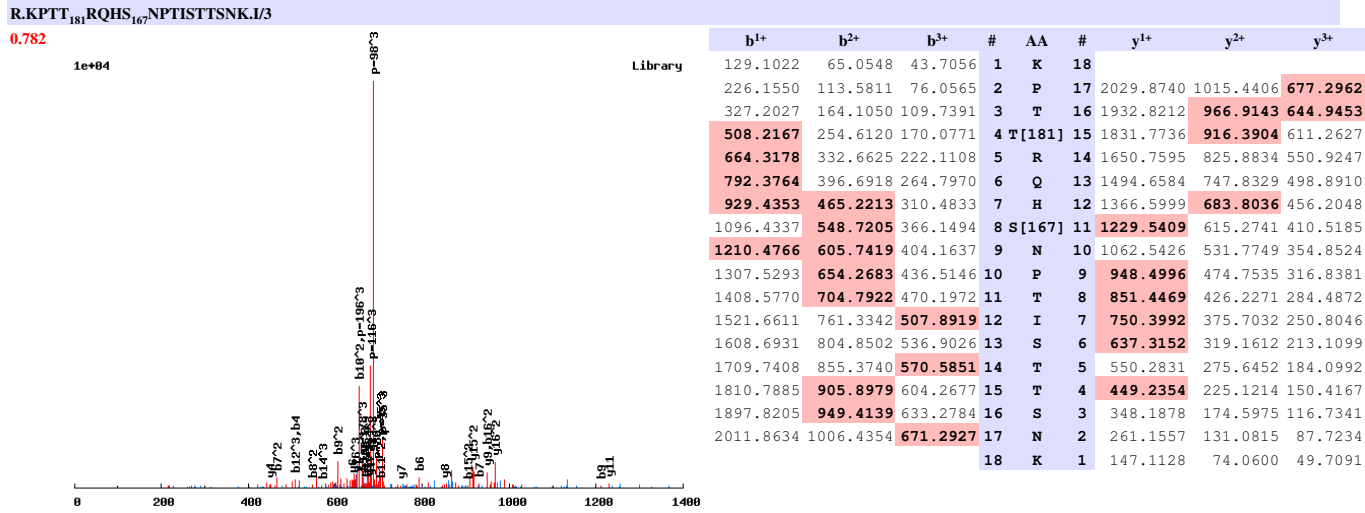

Annotated spectra from Saleem et. al. 2009

K.KQPS<sub>167</sub>LNNIYR.G/3

0.6358

1e+04

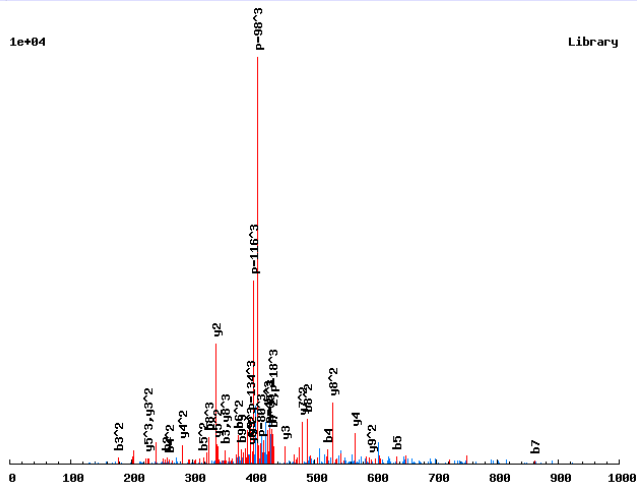

| Library | b <sup>1+</sup> | b <sup>2+</sup> | b <sup>3+</sup> | #  | AA     | #  | y <sup>1+</sup> | y <sup>2+</sup> | y <sup>3+</sup> |
|---------|-----------------|-----------------|-----------------|----|--------|----|-----------------|-----------------|-----------------|
|         | 129.1022        | 65.0548         | 43.7056         | 1  | K      | 10 |                 |                 |                 |
|         | 257.1608        | 129.0840        | 86.3918         | 2  | Q      | 9  | 1184.5460       | 592.7766        | 395.5202        |
|         | 354.2136        | 177.6104        | 118.7427        | 3  | P      | 8  | 1056.4874       | 528.7473        | 352.8340        |
|         | 521.2119        | 261.1096        | 174.4088        | 4  | S[167] | 7  | 959.4346        | 480.2210        | 320.4831        |
|         | 634.2960        | 317.6516        | 212.1035        | 5  | L      | 6  | 792.4363        | 396.7218        | 264.8169        |
|         | 748.3389        | 374.6731        | 250.1178        | 6  | N      | 5  | 679.3522        | 340.1797        | 227.1223        |
|         | 862.3819        | 431.6946        | 288.1321        | 7  | N      | 4  | 565.3093        | 283.1583        | 189.1079        |
|         | 975.4659        | 488.2366        | 325.8268        | 8  | I      | 3  | 451.2663        | 226.1368        | 151.0936        |
|         | 1138.5293       | 569.7683        | 380.1813        | 9  | Y      | 2  | 338.1823        | 169.5948        | 113.3989        |
|         |                 |                 |                 | 10 | R      | 1  | 175.1190        | 88.0631         | 59.0445         |

# Annotated spectra from Saleem et. al. 2009

K.KQQPTGDST<sub>181</sub>PSGTAT<sub>181</sub>NSAVS<sub>167</sub>T<sub>181</sub>PLTPK<sub>1/3</sub>

0.7778

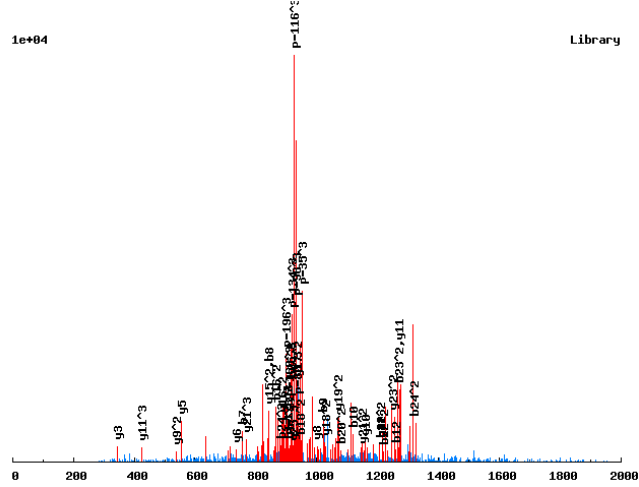

| Library | b <sup>1+</sup> | b <sup>2+</sup> | b <sup>3+</sup> | #  | AA     | #  | y <sup>1+</sup> | y <sup>2+</sup> | y <sup>3+</sup> |
|---------|-----------------|-----------------|-----------------|----|--------|----|-----------------|-----------------|-----------------|
|         | 129.1022        | 65.0548         | 43.7056         | 1  | K      | 26 |                 |                 |                 |
|         | 257.1608        | 129.0840        | 86.3918         | 2  | Q      | 25 | 2763.0600       | 1382.0336       | 921.6915        |
|         | 385.2194        | 193.1133        | 129.0780        | 3  | Q      | 24 | 2635.0014       | 1318.0044       | 879.0053        |
|         | 482.2722        | 241.6397        | 161.4289        | 4  | P      | 23 | 2506.9428       | 1253.9751       | 836.3191        |
|         | 583.3198        | 292.1636        | 195.1115        | 5  | T      | 22 | 2409.8901       | 1205.4487       | 803.9682        |
|         | 640.3413        | 320.6743        | 214.1186        | 6  | G      | 21 | 2308.8424       | 1154.9248       | 770.2857        |
|         | 755.3682        | 378.1878        | 252.4609        | 7  | D      | 20 | 2251.8209       | 1126.4141       | 751.2785        |
|         | 842.4003        | 421.7038        | 281.4716        | 8  | S      | 19 | 2136.7940       | 1068.9006       | 712.9362        |
|         | 1023.4143       | 512.2108        | 341.8096        | 9  | T[181] | 18 | 2049.7620       | 1025.3846       | 683.9255        |
|         | 1120.4670       | 560.7372        | 374.1605        | 10 | P      | 17 | 1868.7480       | 934.8776        | 623.5875        |
|         | 1207.4991       | 604.2532        | 403.1712        | 11 | S      | 16 | 1771.6952       | 886.3512        | 591.2366        |
|         | 1264.5205       | 632.7639        | 422.1784        | 12 | G      | 15 | 1684.6632       | 842.8352        | 562.2259        |
|         | 1365.5682       | 683.2877        | 455.8609        | 13 | T      | 14 | 1627.6417       | 814.3245        | 543.2188        |
|         | 1436.6053       | 718.8063        | 479.5400        | 14 | A      | 13 | 1526.5940       | 763.8007        | 509.5362        |
|         | 1617.6193       | 809.3133        | 539.8780        | 15 | T[181] | 12 | 1455.5569       | 728.2821        | 485.8572        |
|         | 1731.6623       | 866.3348        | 577.8923        | 16 | N      | 11 | 1274.5429       | 637.7751        | 425.5192        |
|         | 1818.6943       | 909.8508        | 606.9030        | 17 | S      | 10 | 1160.5000       | 580.7536        | 387.5048        |
|         | 1889.7314       | 945.3693        | 630.5820        | 18 | A      | 9  | 1073.4680       | 537.2376        | 358.4942        |
|         | 1988.7998       | 994.9035        | 663.6048        | 19 | V      | 8  | 1002.4308       | 501.7191        | 334.8151        |
|         | 2155.7982       | 1078.4027       | 719.2709        | 20 | S[167] | 7  | 903.3624        | 452.1849        | 301.7923        |
|         | 2336.8122       | 1168.9097       | 779.6089        | 21 | T[181] | 6  | 736.3641        | 368.6857        | 246.1262        |
|         | 2433.8649       | 1217.4361       | 811.9598        | 22 | P      | 5  | 555.3501        | 278.1787        | 185.7882        |
|         | 2546.9490       | 1273.9781       | 849.6545        | 23 | L      | 4  | 458.2973        | 229.6523        | 153.4373        |
|         | 2647.9967       | 1324.5020       | 883.3371        | 24 | T      | 3  | 345.2132        | 173.1103        | 115.7426        |
|         | 2745.0494       | 1373.0284       | 915.6880        | 25 | P      | 2  | 244.1656        | 122.5864        | 82.0600         |
|         |                 |                 |                 | 26 | K      | 1  | 147.1128        | 74.0600         | 49.7091         |



# Annotated spectra from Saleem et. al. 2009

K.K<sub>136</sub>QQPTGDTSPSGTATNS<sub>167</sub>AVST<sub>181</sub>PLT<sub>181</sub>PK<sub>136</sub>I/3

0.9969

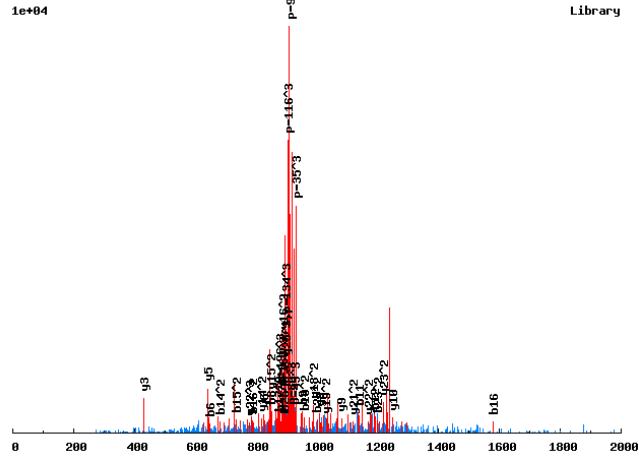

| Library | b <sup>1+</sup> | b <sup>2+</sup> | b <sup>3+</sup> | #  | AA     | #  | y <sup>1+</sup> | y <sup>2+</sup> | y <sup>3+</sup> |
|---------|-----------------|-----------------|-----------------|----|--------|----|-----------------|-----------------|-----------------|
|         | 137.1164        | 69.0619         | 46.3770         | 1  | K[136] | 26 |                 |                 |                 |
|         | 265.1750        | 133.0911        | 89.0632         | 2  | Q      | 25 | 2691.1079       | 1346.0576       | 897.7075        |
|         | 393.2336        | 197.1204        | 131.7494        | 3  | Q      | 24 | 2563.0493       | 1282.0283       | 855.0213        |
|         | 490.2864        | 245.6468        | 164.1003        | 4  | P      | 23 | 2434.9907       | 1217.9990       | 812.3351        |
|         | 591.3340        | 296.1707        | 197.7829        | 5  | T      | 22 | 2337.9380       | 1169.4726       | 779.9842        |
|         | 648.3555        | 324.6814        | 216.7900        | 6  | G      | 21 | 2236.8903       | 1118.9488       | 746.3016        |
|         | 763.3824        | 382.1949        | 255.1323        | 7  | D      | 20 | 2179.8688       | 1090.4380       | 727.2945        |
|         | 850.4145        | 425.7109        | 284.1430        | 8  | S      | 19 | 2064.8419       | 1032.9246       | 688.9521        |
|         | 951.4621        | 476.2347        | 317.8256        | 9  | T      | 18 | 1977.8098       | 989.4086        | 659.9415        |
|         | 1048.5149       | 524.7611        | 350.1765        | 10 | P      | 17 | 1876.7622       | 938.8847        | 626.2589        |
|         | 1135.5469       | 568.2771        | 379.1872        | 11 | S      | 16 | 1779.7094       | 890.3583        | 593.9080        |
|         | 1192.5684       | 596.7878        | 398.1943        | 12 | G      | 15 | 1692.6774       | 846.8423        | 564.8973        |
|         | 1293.6161       | 647.3117        | 431.8769        | 13 | T      | 14 | 1635.6559       | 818.3316        | 545.8902        |
|         | 1364.6532       | 682.8302        | 455.5559        | 14 | A      | 13 | 1534.6082       | 767.8078        | 512.2076        |
|         | 1465.7009       | 733.3541        | 489.2385        | 15 | T      | 12 | 1463.5711       | 732.2892        | 488.5286        |
|         | 1579.7438       | 790.3755        | 527.2528        | 16 | N      | 11 | 1362.5234       | 681.7654        | 454.8460        |
|         | 1746.7422       | 873.8747        | 582.9189        | 17 | S[167] | 10 | 1248.4805       | 624.7439        | 416.8317        |
|         | 1817.7793       | 909.3933        | 606.5979        | 18 | A      | 9  | 1081.4822       | 541.2447        | 361.1656        |
|         | 1916.8477       | 958.9275        | 639.6207        | 19 | V      | 8  | 1010.4450       | 505.7262        | 337.4865        |
|         | 2003.8797       | 1002.4435       | 668.6314        | 20 | S      | 7  | 911.3766        | 456.1920        | 304.4637        |
|         | 2184.8937       | 1092.9505       | 728.9694        | 21 | T[181] | 6  | 824.3446        | 412.6759        | 275.4531        |
|         | 2281.9465       | 1141.4769       | 761.3203        | 22 | P      | 5  | 643.3306        | 322.1689        | 215.1151        |
|         | 2395.0305       | 1198.0189       | 799.0150        | 23 | L      | 4  | 546.2778        | 273.6426        | 182.7641        |
|         | 2576.0446       | 1288.5259       | 859.3530        | 24 | T[181] | 3  | 433.1938        | 217.1005        | 145.0694        |
|         | 2673.0973       | 1337.0523       | 891.7040        | 25 | P      | 2  | 252.1798        | 126.5935        | 84.7314         |
|         |                 |                 |                 | 26 | K[136] | 1  | 155.1270        | 78.0671         | 52.3805         |

# Annotated spectra from Saleem et. al. 2009

K.K<sub>136</sub>QT<sub>181</sub>ASPLSS<sub>167</sub>STEEPK<sub>136</sub>K/2

0.8329

1e+04

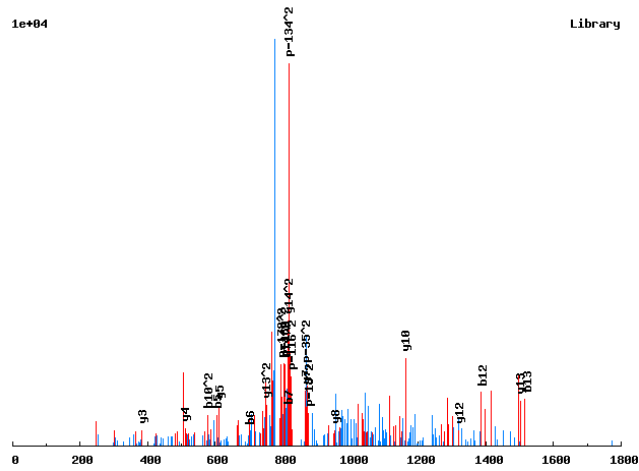

| Library | b <sup>1+</sup> | b <sup>2+</sup> | #  | AA     | #  | y <sup>1+</sup> | y <sup>2+</sup> |
|---------|-----------------|-----------------|----|--------|----|-----------------|-----------------|
|         | 137.1164        | 69.0619         | 1  | K[136] | 15 |                 |                 |
|         | 265.1750        | 133.0911        | 2  | Q      | 14 | 1629.6536       | 815.3304        |
|         | 446.1890        | 223.5982        | 3  | T[181] | 13 | 1501.5950       | 751.3011        |
|         | 517.2261        | 259.1167        | 4  | A      | 12 | 1320.5810       | 660.7941        |
|         | 604.2582        | 302.6327        | 5  | S      | 11 | 1249.5439       | 625.2756        |
|         | 701.3109        | 351.1591        | 6  | P      | 10 | 1162.5119       | 581.7596        |
|         | 814.3950        | 407.7011        | 7  | L      | 9  | 1065.4591       | 533.2332        |
|         | 901.4270        | 451.2172        | 8  | S      | 8  | 952.3750        | 476.6912        |
|         | 1068.4254       | 534.7163        | 9  | S[167] | 7  | 865.3430        | 433.1751        |
|         | 1155.4574       | 578.2323        | 10 | S      | 6  | 698.3446        | 349.6760        |
|         | 1256.5051       | 628.7562        | 11 | T      | 5  | 611.3126        | 306.1599        |
|         | 1385.5477       | 693.2775        | 12 | E      | 4  | 510.2649        | 255.6361        |
|         | 1514.5903       | 757.7988        | 13 | E      | 3  | 381.2223        | 191.1148        |
|         | 1611.6430       | 806.3252        | 14 | P      | 2  | 252.1798        | 126.5935        |
|         |                 |                 | 15 | K[136] | 1  | 155.1270        | 78.0671         |

# Annotated spectra from Saleem et. al. 2009

R.KRPTSPSISGS<sub>167</sub>GS<sub>167</sub>GGNSPSSSAGAR.Q/3

0.7339

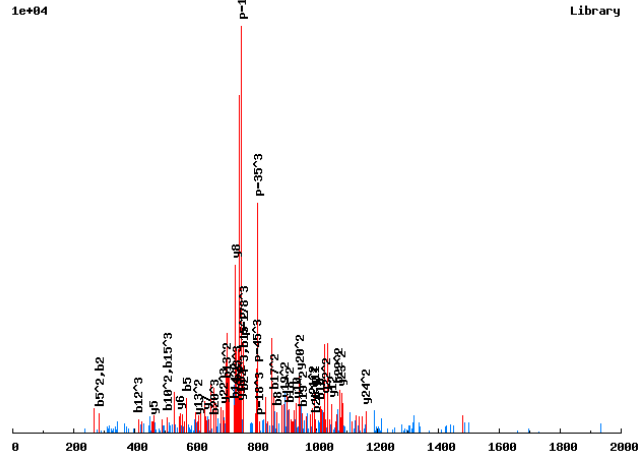

| Library | b <sup>1+</sup>  | b <sup>2+</sup>  | b <sup>3+</sup> | #  | AA     | #  | y <sup>1+</sup>  | y <sup>2+</sup>  | y <sup>3+</sup> |
|---------|------------------|------------------|-----------------|----|--------|----|------------------|------------------|-----------------|
|         | 129.1022         | 65.0548          | 43.7056         | 1  | K      | 25 |                  |                  |                 |
|         | <b>285.2033</b>  | 143.1053         | 95.7393         | 2  | R      | 24 | 2320.9555        | <b>1160.9814</b> | 774.3233        |
|         | 382.2561         | 191.6317         | 128.0902        | 3  | P      | 23 | 2164.8544        | <b>1082.9308</b> | 722.2896        |
|         | 483.3038         | 242.1555         | 161.7728        | 4  | T      | 22 | 2067.8016        | <b>1034.4044</b> | <b>689.9387</b> |
|         | <b>570.3358</b>  | <b>285.6716</b>  | 190.7835        | 5  | S      | 21 | 1966.7539        | <b>983.8806</b>  | 656.2562        |
|         | 667.3886         | 334.1979         | 223.1344        | 6  | P      | 20 | 1879.7219        | <b>940.3646</b>  | 627.2455        |
|         | 754.4206         | 377.7139         | 252.1451        | 7  | S      | 19 | 1782.6691        | <b>891.8382</b>  | 594.8946        |
|         | <b>867.5047</b>  | 434.2560         | 289.8397        | 8  | I      | 18 | 1695.6371        | 848.3222         | 565.8839        |
|         | 954.5367         | 477.7720         | 318.8504        | 9  | S      | 17 | 1582.5530        | 791.7802         | 528.1892        |
|         | <b>1011.5582</b> | <b>506.2827</b>  | 337.8576        | 10 | G      | 16 | 1495.5210        | <b>748.2641</b>  | 499.1785        |
|         | 1178.5565        | 589.7819         | 393.5237        | 11 | S[167] | 15 | 1438.4995        | 719.7534         | 480.1714        |
|         | 1235.5780        | 618.2926         | <b>412.5308</b> | 12 | G      | 14 | 1271.5012        | 636.2542         | 424.5052        |
|         | 1402.5763        | <b>701.7918</b>  | 468.1970        | 13 | S[167] | 13 | 1214.4797        | <b>607.7435</b>  | 405.4981        |
|         | 1459.5978        | <b>730.3025</b>  | 487.2041        | 14 | G      | 12 | <b>1047.4814</b> | 524.2443         | 349.8320        |
|         | 1516.6193        | <b>758.8133</b>  | <b>506.2113</b> | 15 | G      | 11 | <b>990.4599</b>  | 495.7336         | 330.8248        |
|         | 1630.6622        | 815.8347         | 544.2256        | 16 | N      | 10 | <b>933.4384</b>  | 467.2229         | 311.8177        |
|         | 1717.6942        | <b>859.3508</b>  | 573.2363        | 17 | S      | 9  | 819.3955         | 410.2014         | 273.8034        |
|         | 1814.7470        | <b>907.8771</b>  | 605.5872        | 18 | P      | 8  | <b>732.3635</b>  | 366.6854         | 244.7927        |
|         | 1901.7790        | <b>951.3931</b>  | 634.5979        | 19 | S      | 7  | <b>635.3107</b>  | 318.1590         | 212.4418        |
|         | 1988.8110        | <b>994.9092</b>  | <b>663.6085</b> | 20 | S      | 6  | <b>548.2787</b>  | 274.6430         | 183.4311        |
|         | 2075.8431        | 1038.4252        | 692.6192        | 21 | S      | 5  | <b>461.2467</b>  | 231.1270         | 154.4204        |
|         | 2146.8802        | <b>1073.9437</b> | 716.2982        | 22 | A      | 4  | 374.2146         | 187.6110         | 125.4097        |
|         | 2203.9016        | 1102.4545        | <b>735.3054</b> | 23 | G      | 3  | 303.1775         | 152.0924         | 101.7307        |
|         | 2274.9388        | 1137.9730        | <b>758.9844</b> | 24 | A      | 2  | 246.1561         | 123.5817         | 82.7235         |
|         |                  |                  |                 | 25 | R      | 1  | 175.1190         | 88.0631          | 59.0445         |

# Annotated spectra from Saleem et. al. 2009

R.KRS<sub>167</sub>NPTS<sub>167</sub>ASS<sub>167</sub>SQSELSQPK.N/3

0.8863

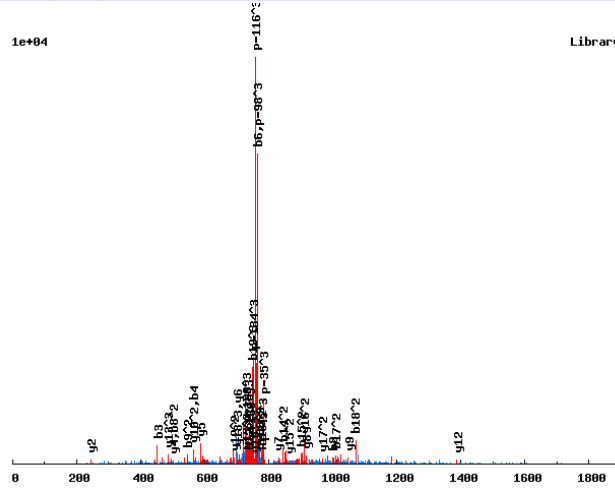

| Library | b <sup>1+</sup> | b <sup>2+</sup> | b <sup>3+</sup> | #  | AA     | #  | y <sup>1+</sup> | y <sup>2+</sup> | y <sup>3+</sup> |
|---------|-----------------|-----------------|-----------------|----|--------|----|-----------------|-----------------|-----------------|
|         | 129.1022        | 65.0548         | 43.7056         | 1  | K      | 20 |                 |                 |                 |
|         | 285.2033        | 143.1053        | 95.7393         | 2  | R      | 19 | 2259.8568       | 1130.4320       | 753.9571        |
|         | 452.2017        | 226.6045        | 151.4054        | 3  | S[167] | 18 | 2103.7556       | 1052.3815       | 701.9234        |
|         | 566.2446        | 283.6260        | 189.4197        | 4  | N      | 17 | 1936.7573       | 968.8823        | 646.2573        |
|         | 663.2974        | 332.1523        | 221.7707        | 5  | P      | 16 | 1822.7144       | 911.8608        | 608.2430        |
|         | 764.3451        | 382.6762        | 255.4532        | 6  | T      | 15 | 1725.6616       | 863.3344        | 575.8921        |
|         | 931.3434        | 466.1754        | 311.1193        | 7  | S[167] | 14 | 1624.6139       | 812.8106        | 542.2095        |
|         | 1002.3806       | 501.6939        | 334.7984        | 8  | A      | 13 | 1457.6156       | 729.3114        | 486.5434        |
|         | 1089.4126       | 545.2099        | 363.8090        | 9  | S      | 12 | 1386.5784       | 693.7929        | 462.8643        |
|         | 1256.4109       | 628.7091        | 419.4752        | 10 | S[167] | 11 | 1299.5464       | 650.2768        | 433.8537        |
|         | 1343.4430       | 672.2251        | 448.4858        | 11 | S      | 10 | 1132.5481       | 566.7777        | 378.1875        |
|         | 1471.5016       | 736.2544        | 491.1720        | 12 | Q      | 9  | 1045.5160       | 523.2617        | 349.1769        |
|         | 1558.5336       | 779.7704        | 520.1827        | 13 | S      | 8  | 917.4574        | 459.2324        | 306.4907        |
|         | 1687.5762       | 844.2917        | 563.1969        | 14 | E      | 7  | 830.4254        | 415.7163        | 277.4800        |
|         | 1800.6602       | 900.8338        | 600.8916        | 15 | L      | 6  | 701.3828        | 351.1951        | 234.4658        |
|         | 1887.6923       | 944.3498        | 629.9023        | 16 | S      | 5  | 588.2988        | 294.6530        | 196.7711        |
|         | 2016.7349       | 1008.8711       | 672.9165        | 17 | E      | 4  | 501.2667        | 251.1370        | 167.7604        |
|         | 2144.7934       | 1072.9004       | 715.6027        | 18 | Q      | 3  | 372.2241        | 186.6157        | 124.7462        |
|         | 2241.8462       | 1121.4267       | 747.9536        | 19 | P      | 2  | 244.1656        | 122.5864        | 82.0600         |
|         |                 |                 |                 | 20 | K      | 1  | 147.1128        | 74.0600         | 49.7091         |

# Annotated spectra from Saleem et. al. 2009

R.K<sub>136</sub>R<sub>166</sub>S<sub>167</sub>NPTSASSSQSELSEQPK<sub>136</sub>N/3

0.9999

1e+04

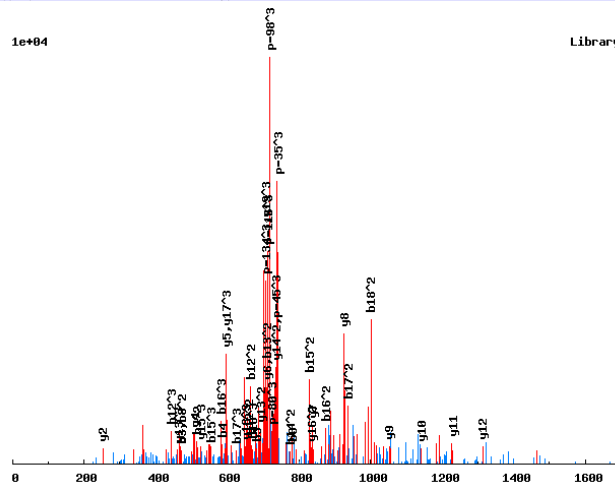

| Library | b <sup>1+</sup> | b <sup>2+</sup> | b <sup>3+</sup> | #  | AA     | #  | y <sup>1+</sup> | y <sup>2+</sup> | y <sup>3+</sup> |
|---------|-----------------|-----------------|-----------------|----|--------|----|-----------------|-----------------|-----------------|
|         | 137.1164        | 69.0619         | 46.3770         | 1  | K[136] | 20 |                 |                 |                 |
|         | 303.2258        | 152.1165        | 101.7468        | 2  | R[166] | 19 | 2117.9466       | 1059.4769       | 706.6537        |
|         | 470.2242        | 235.6157        | 157.4129        | 3  | S[167] | 18 | 1951.8372       | 976.4222        | 651.2839        |
|         | 584.2671        | 292.6372        | 195.4272        | 4  | N      | 17 | 1784.8388       | 892.9230        | 595.6178        |
|         | 681.3199        | 341.1636        | 227.7781        | 5  | P      | 16 | 1670.7959       | 835.9016        | 557.6035        |
|         | 782.3675        | 391.6874        | 261.4607        | 6  | T      | 15 | 1573.7431       | 787.3752        | 525.2526        |
|         | 869.3996        | 435.2034        | 290.4714        | 7  | S      | 14 | 1472.6954       | 736.8514        | 491.5700        |
|         | 940.4367        | 470.7220        | 314.1504        | 8  | A      | 13 | 1385.6634       | 693.3353        | 462.5593        |
|         | 1027.4687       | 514.2380        | 343.1611        | 9  | S      | 12 | 1314.6263       | 657.8168        | 438.8803        |
|         | 1114.5007       | 557.7540        | 372.1718        | 10 | S      | 11 | 1227.5943       | 614.3008        | 409.8696        |
|         | 1201.5328       | 601.2700        | 401.1824        | 11 | S      | 10 | 1140.5622       | 570.7848        | 380.8589        |
|         | 1329.5914       | 665.2993        | 443.8686        | 12 | Q      | 9  | 1053.5302       | 527.2687        | 351.8483        |
|         | 1416.6234       | 708.8153        | 472.8793        | 13 | S      | 8  | 925.4716        | 463.2395        | 309.1621        |
|         | 1545.6660       | 773.3366        | 515.8935        | 14 | E      | 7  | 838.4396        | 419.7234        | 280.1514        |
|         | 1658.7500       | 829.8787        | 553.5882        | 15 | L      | 6  | 709.3970        | 355.2021        | 237.1372        |
|         | 1745.7821       | 873.3947        | 582.5989        | 16 | S      | 5  | 596.3130        | 298.6601        | 199.4425        |
|         | 1874.8247       | 937.9160        | 625.6131        | 17 | E      | 4  | 509.2809        | 255.1441        | 170.4318        |
|         | 2002.8832       | 1001.9453       | 668.2993        | 18 | Q      | 3  | 380.2383        | 190.6228        | 127.4176        |
|         | 2099.9360       | 1050.4716       | 700.6502        | 19 | P      | 2  | 252.1798        | 126.5935        | 84.7314         |
|         |                 |                 |                 | 20 | K[136] | 1  | 155.1270        | 78.0671         | 52.3805         |

# Annotated spectra from Saleem et. al. 2009

K.K<sub>136</sub>R<sub>166</sub>S<sub>Y</sub><sub>243</sub>S<sub>167</sub>P<sub>N</sub>AYEIQPDYSEYR<sub>166</sub>R/3

0.9769

1e+04

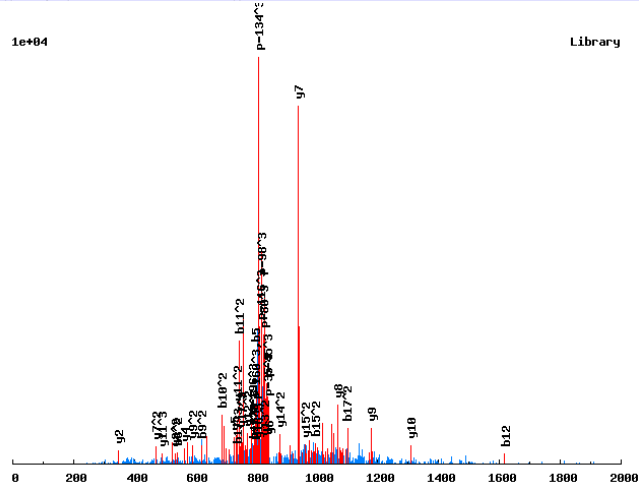

| Library | b <sup>1+</sup> | b <sup>2+</sup> | b <sup>3+</sup> | #  | AA     | #  | y <sup>1+</sup> | y <sup>2+</sup> | y <sup>3+</sup> |
|---------|-----------------|-----------------|-----------------|----|--------|----|-----------------|-----------------|-----------------|
|         | 137.1164        | 69.0619         | 46.3770         | 1  | K[136] | 19 |                 |                 |                 |
|         | 303.2258        | 152.1165        | 101.7468        | 2  | R[166] | 18 | 2417.9590       | 1209.4831       | 806.6578        |
|         | 390.2578        | 195.6326        | 130.7575        | 3  | S      | 17 | 2251.8496       | 1126.4284       | 751.2881        |
|         | 633.2875        | 317.1474        | 211.7674        | 4  | Y[243] | 16 | 2164.8176       | 1082.9124       | 722.2774        |
|         | 800.2859        | 400.6466        | 267.4335        | 5  | S[167] | 15 | 1921.7879       | 961.3976        | 641.2675        |
|         | 897.3386        | 449.1730        | 299.7844        | 6  | P      | 14 | 1754.7896       | 877.8984        | 585.6014        |
|         | 1011.3816       | 506.1944        | 337.7987        | 7  | N      | 13 | 1657.7368       | 829.3720        | 553.2505        |
|         | 1082.4187       | 541.7130        | 361.4777        | 8  | A      | 12 | 1543.6939       | 772.3506        | 515.2361        |
|         | 1245.4820       | 623.2446        | 415.8322        | 9  | Y      | 11 | 1472.6568       | 736.8320        | 491.5571        |
|         | 1374.5246       | 687.7659        | 458.8464        | 10 | E      | 10 | 1309.5934       | 655.3004        | 437.2027        |
|         | 1487.6086       | 744.3080        | 496.5411        | 11 | I      | 9  | 1180.5508       | 590.7791        | 394.1885        |
|         | 1615.6672       | 808.3373        | 539.2273        | 12 | Q      | 8  | 1067.4668       | 534.2370        | 356.4938        |
|         | 1712.7200       | 856.8636        | 571.5782        | 13 | P      | 7  | 939.4082        | 470.2077        | 313.8076        |
|         | 1827.7469       | 914.3771        | 609.9205        | 14 | D      | 6  | 842.3554        | 421.6814        | 281.4567        |
|         | 1990.8103       | 995.9088        | 664.2749        | 15 | Y      | 5  | 727.3285        | 364.1679        | 243.1144        |
|         | 2077.8423       | 1039.4248       | 693.2856        | 16 | S      | 4  | 564.2652        | 282.6362        | 188.7599        |
|         | 2206.8849       | 1103.9461       | 736.2998        | 17 | E      | 3  | 477.2331        | 239.1202        | 159.7492        |
|         | 2369.9482       | 1185.4777       | 790.6543        | 18 | Y      | 2  | 348.1905        | 174.5989        | 116.7350        |
|         |                 |                 |                 | 19 | R[166] | 1  | 185.1272        | 93.0672         | 62.3806         |

# Annotated spectra from Saleem et. al. 2009

K.K<sub>136</sub>SEGDEES<sub>167</sub>DDAVDENDVK<sub>136</sub>K<sub>136</sub>C/3

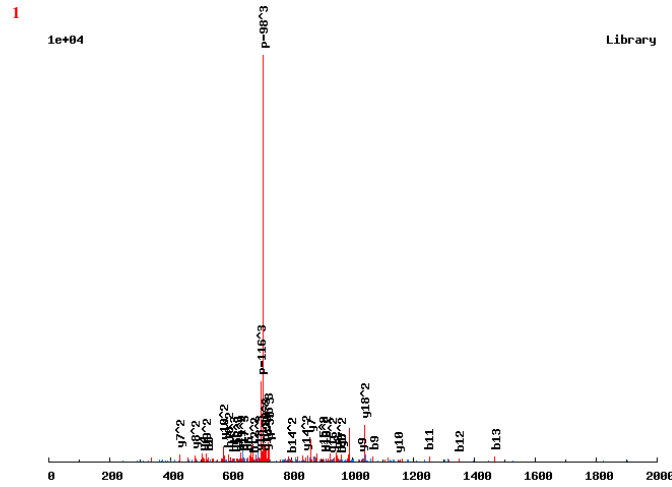

| Library | b <sup>1+</sup> | b <sup>2+</sup> | b <sup>3+</sup> | #  | AA     | #  | y <sup>1+</sup> | y <sup>2+</sup> | y <sup>3+</sup> |
|---------|-----------------|-----------------|-----------------|----|--------|----|-----------------|-----------------|-----------------|
|         | 137.1164        | 69.0619         | 46.3770         | 1  | K[136] | 19 |                 |                 |                 |
|         | 224.1485        | 112.5779        | 75.3877         | 2  | S      | 18 | 2076.8099       | 1038.9086       | 692.9415        |
|         | 353.1911        | 177.0992        | 118.4019        | 3  | E      | 17 | 1989.7779       | 995.3926        | 663.9308        |
|         | 410.2125        | 205.6099        | 137.4090        | 4  | G      | 16 | 1860.7353       | 930.8713        | 620.9166        |
|         | 525.2395        | 263.1234        | 175.7513        | 5  | D      | 15 | 1803.7138       | 902.3606        | 601.9095        |
|         | 654.2820        | 327.6447        | 218.7655        | 6  | E      | 14 | 1688.6869       | 844.8471        | 563.5672        |
|         | 783.3246        | 392.1660        | 261.7797        | 7  | E      | 13 | 1559.6443       | 780.3258        | 520.5530        |
|         | 950.3230        | 475.6651        | 317.4459        | 8  | S[167] | 12 | 1430.6017       | 715.8045        | 477.5388        |
|         | 1065.3499       | 533.1786        | 355.7882        | 9  | D      | 11 | 1263.6034       | 632.3053        | 421.8726        |
|         | 1180.3769       | 590.6921        | 394.1305        | 10 | D      | 10 | 1148.5764       | 574.7919        | 383.5303        |
|         | 1251.4140       | 626.2106        | 417.8095        | 11 | A      | 9  | 1033.5495       | 517.2784        | 345.1880        |
|         | 1350.4824       | 675.7448        | 450.8323        | 12 | V      | 8  | 962.5124        | 481.7598        | 321.5090        |
|         | 1465.5093       | 733.2583        | 489.1746        | 13 | D      | 7  | 863.4440        | 432.2256        | 288.4862        |
|         | 1594.5519       | 797.7796        | 532.1888        | 14 | E      | 6  | 748.4170        | 374.7122        | 250.1439        |
|         | 1708.5949       | 854.8011        | 570.2031        | 15 | N      | 5  | 619.3744        | 310.1909        | 207.1297        |
|         | 1823.6218       | 912.3145        | 608.5455        | 16 | D      | 4  | 505.3315        | 253.1694        | 169.1154        |
|         | 1922.6902       | 961.8487        | 641.5683        | 17 | V      | 3  | 390.3046        | 195.6559        | 130.7730        |
|         | 2058.7994       | 1029.9033       | 686.9380        | 18 | K[136] | 2  | 291.2362        | 146.1217        | 97.7502         |
|         |                 |                 |                 | 19 | K[136] | 1  | 155.1270        | 78.0671         | 52.3805         |

# Annotated spectra from Saleem et. al. 2009

K.KS<sub>167</sub>FDDTIELK.K/2

0.5915

1e+04

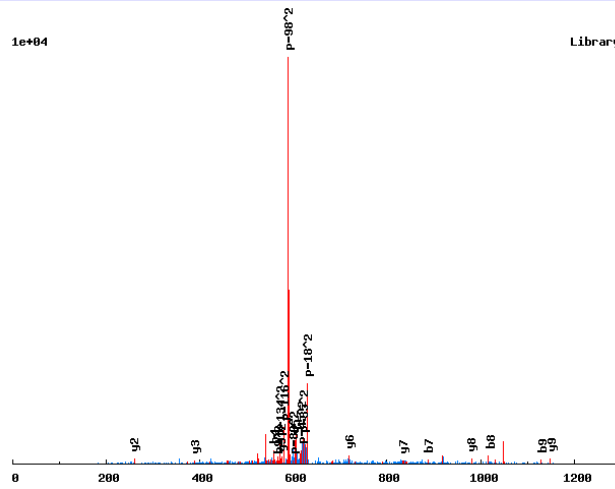

| Library | b <sup>1+</sup> | b <sup>2+</sup> | #  | AA     | #  | y <sup>1+</sup> | y <sup>2+</sup> |
|---------|-----------------|-----------------|----|--------|----|-----------------|-----------------|
|         | 129.1022        | 65.0548         | 1  | K      | 10 |                 |                 |
|         | 296.1006        | 148.5539        | 2  | S[167] | 9  | 1147.4918       | 574.2496        |
|         | 443.1690        | 222.0881        | 3  | F      | 8  | 980.4935        | 490.7504        |
|         | 558.1960        | 279.6016        | 4  | D      | 7  | 833.4251        | 417.2162        |
|         | 673.2229        | 337.1151        | 5  | D      | 6  | 718.3981        | 359.7027        |
|         | 774.2706        | 387.6389        | 6  | T      | 5  | 603.3712        | 302.1892        |
|         | 887.3546        | 444.1810        | 7  | I      | 4  | 502.3235        | 251.6654        |
|         | 1016.3972       | 508.7023        | 8  | E      | 3  | 389.2394        | 195.1234        |
|         | 1129.4813       | 565.2443        | 9  | L      | 2  | 260.1969        | 130.6021        |
|         |                 |                 | 10 | K      | 1  | 147.1128        | 74.0600         |



Annotated spectra from Saleem et. al. 2009

K.KSFTPS<sub>167</sub>KS<sub>167</sub>PAPVSK.K/3

0.9921

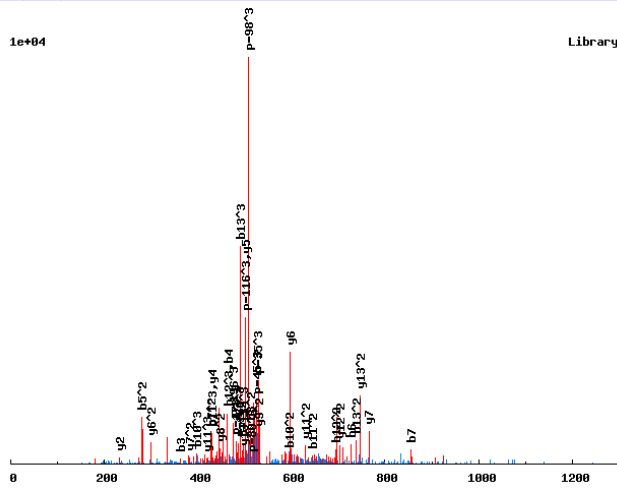

| Library | b <sup>1+</sup> | b <sup>2+</sup> | b <sup>3+</sup> | #  | AA     | #  | y <sup>1+</sup> | y <sup>2+</sup> | y <sup>3+</sup> |
|---------|-----------------|-----------------|-----------------|----|--------|----|-----------------|-----------------|-----------------|
|         | 129.1022        | 65.0548         | 43.7056         | 1  | K      | 14 |                 |                 |                 |
|         | 216.1343        | 108.5708        | 72.7163         | 2  | S      | 13 | 1492.6484       | 746.8279        | 498.2210        |
|         | 363.2027        | 182.1050        | 121.7391        | 3  | F      | 12 | 1405.6164       | 703.3118        | 469.2103        |
|         | 464.2504        | 232.6288        | 155.4216        | 4  | T      | 11 | 1258.5480       | 629.7776        | 420.1875        |
|         | 561.3031        | 281.1552        | 187.7726        | 5  | P      | 10 | 1157.5003       | 579.2538        | 386.5050        |
|         | 728.3015        | 364.6544        | 243.4387        | 6  | S[167] | 9  | 1060.4476       | 530.7274        | 354.1540        |
|         | 856.3964        | 428.7019        | 286.1370        | 7  | K      | 8  | 893.4492        | 447.2282        | 298.4879        |
|         | 1023.3948       | 512.2010        | 341.8031        | 8  | S[167] | 7  | 765.3542        | 383.1808        | 255.7896        |
|         | 1120.4476       | 560.7274        | 374.1540        | 9  | P      | 6  | 598.3559        | 299.6816        | 200.1235        |
|         | 1191.4847       | 596.2460        | 397.8331        | 10 | A      | 5  | 501.3031        | 251.1552        | 167.7726        |
|         | 1288.5374       | 644.7724        | 430.1840        | 11 | P      | 4  | 430.2660        | 215.6366        | 144.0935        |
|         | 1387.6058       | 694.3066        | 463.2068        | 12 | V      | 3  | 333.2132        | 167.1103        | 111.7426        |
|         | 1474.6379       | 737.8226        | 492.2175        | 13 | S      | 2  | 234.1448        | 117.5761        | 78.7198         |
|         |                 |                 |                 | 14 | K      | 1  | 147.1128        | 74.0600         | 49.7091         |

# Annotated spectra from Saleem et. al. 2009

R.KS<sub>167</sub>GS<sub>167</sub>LEALQNAK.I/2

0.9996

1e+04

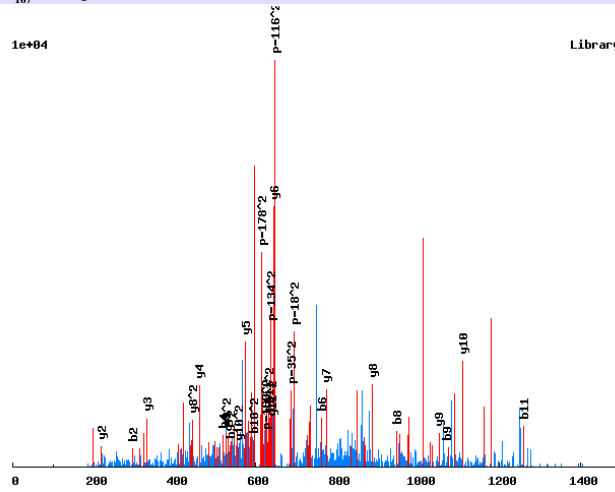

| Library | b <sup>1+</sup>  | b <sup>2+</sup> | #  | AA     | #  | y <sup>1+</sup> | y <sup>2+</sup> |
|---------|------------------|-----------------|----|--------|----|-----------------|-----------------|
|         | 129.1022         | 65.0548         | 1  | K      | 12 |                 |                 |
|         | <b>296.1006</b>  | 148.5539        | 2  | S[167] | 11 | 1277.5174       | <b>639.2624</b> |
|         | 353.1221         | 177.0647        | 3  | G      | 10 | 1110.5191       | 555.7632        |
|         | <b>520.1204</b>  | 260.5639        | 4  | S[167] | 9  | 1053.4976       | <b>527.2524</b> |
|         | <b>633.2045</b>  | 317.1059        | 5  | L      | 8  | 886.4992        | <b>443.7533</b> |
|         | <b>762.2471</b>  | 381.6272        | 6  | E      | 7  | 773.4152        | 387.2112        |
|         | 833.2842         | 417.1457        | 7  | A      | 6  | 644.3726        | 322.6899        |
|         | <b>946.3682</b>  | 473.6878        | 8  | L      | 5  | 573.3355        | 287.1714        |
|         | <b>1074.4268</b> | <b>537.7171</b> | 9  | Q      | 4  | 460.2514        | 230.6293        |
|         | 1188.4698        | <b>594.7385</b> | 10 | N      | 3  | 332.1928        | 166.6001        |
|         | <b>1259.5069</b> | <b>630.2571</b> | 11 | A      | 2  | <b>218.1499</b> | 109.5786        |
|         |                  |                 | 12 | K      | 1  | 147.1128        | 74.0600         |

# Annotated spectra from Saleem et. al. 2009

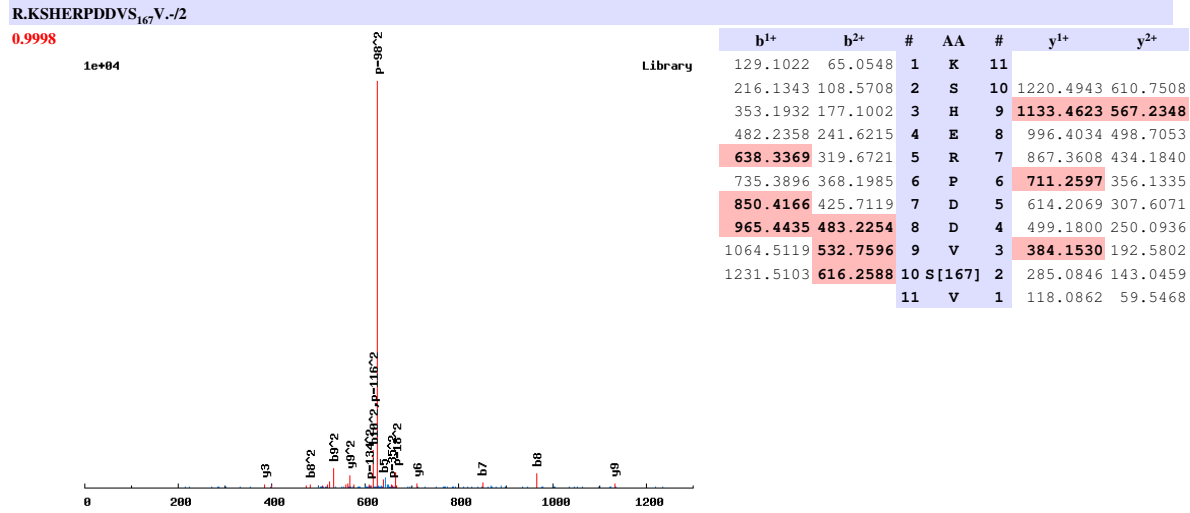

# Annotated spectra from Saleem et. al. 2009

R.K<sub>136</sub>SIS<sub>167</sub>GGT<sub>181</sub>FGFR<sub>166</sub>S/2

0.9933

1e+04

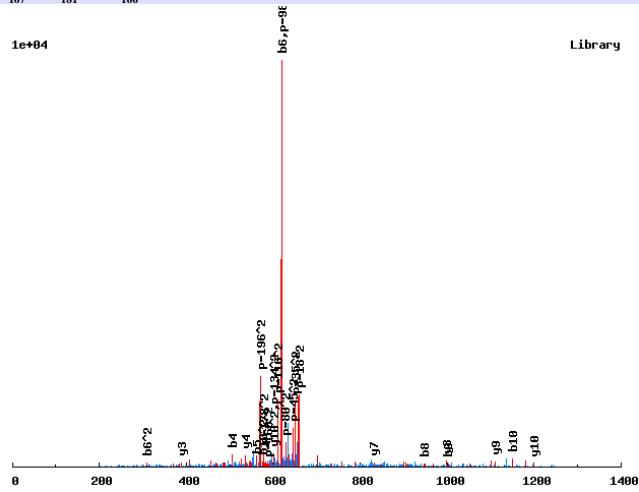

| Library | b <sup>1+</sup> | b <sup>2+</sup> | #  | AA     | #  | y <sup>1+</sup> | y <sup>2+</sup> |
|---------|-----------------|-----------------|----|--------|----|-----------------|-----------------|
|         | 137.1164        | 69.0619         | 1  | K[136] | 11 |                 |                 |
|         | 224.1485        | 112.5779        | 2  | S      | 10 | 1198.4569       | 599.7321        |
|         | 337.2325        | 169.1199        | 3  | I      | 9  | 1111.4249       | 556.2161        |
|         | 504.2309        | 252.6191        | 4  | S[167] | 8  | 998.3408        | 499.6740        |
|         | 561.2524        | 281.1298        | 5  | G      | 7  | 831.3424        | 416.1749        |
|         | 618.2738        | 309.6405        | 6  | G      | 6  | 774.3210        | 387.6641        |
|         | 799.2878        | 400.1476        | 7  | T[181] | 5  | 717.2995        | 359.1534        |
|         | 946.3562        | 473.6818        | 8  | F      | 4  | 536.2855        | 268.6464        |
|         | 1003.3777       | 502.1925        | 9  | G      | 3  | 389.2171        | 195.1122        |
|         | 1150.4461       | 575.7267        | 10 | F      | 2  | 332.1956        | 166.6015        |
|         |                 |                 | 11 | R[166] | 1  | 185.1272        | 93.0672         |

### Annotated spectra from Saleem et. al. 2009

K.KSLLD<sub>167</sub>PHDTS<sub>167</sub>PVKETIAR.D/3

0.9726

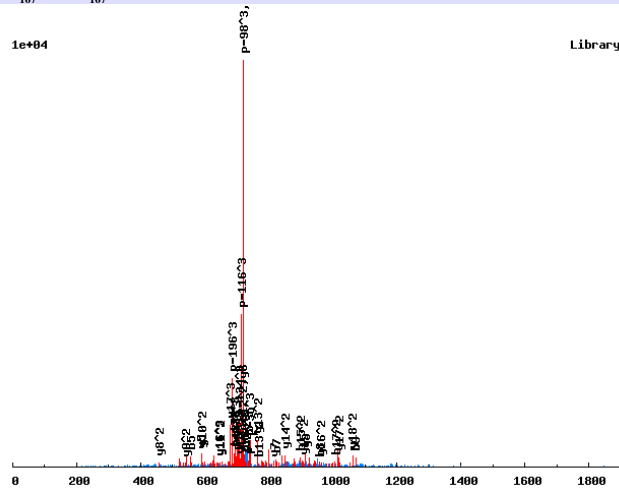

| Library | b <sup>1+</sup> | b <sup>2+</sup> | b <sup>3+</sup> | #  | AA     | #  | y <sup>1+</sup> | y <sup>2+</sup> | y <sup>3+</sup> |
|---------|-----------------|-----------------|-----------------|----|--------|----|-----------------|-----------------|-----------------|
|         | 129.1022        | 65.0548         | 43.7056         | 1  | K      | 19 |                 |                 |                 |
|         | 216.1343        | 108.5708        | 72.7163         | 2  | S      | 18 | 2125.9566       | 1063.4820       | 709.3237        |
|         | 329.2183        | 165.1128        | 110.4110        | 3  | L      | 17 | 2038.9246       | 1019.9659       | 680.3131        |
|         | 442.3024        | 221.6548        | 148.1056        | 4  | L      | 16 | 1925.8405       | 963.4239        | 642.6184        |
|         | 557.3293        | 279.1683        | 186.4480        | 5  | D      | 15 | 1812.7565       | 906.8819        | 604.9237        |
|         | 724.3277        | 362.6675        | 242.1141        | 6  | S[167] | 14 | 1697.7295       | 849.3684        | 566.5814        |
|         | 821.3805        | 411.1939        | 274.4650        | 7  | P      | 13 | 1530.7312       | 765.8692        | 510.9152        |
|         | 958.4394        | 479.7233        | 320.1513        | 8  | H      | 12 | 1433.6784       | 717.3428        | 478.5643        |
|         | 1073.4663       | 537.2368        | 358.4936        | 9  | D      | 11 | 1296.6195       | 648.8134        | 432.8780        |
|         | 1174.5140       | 587.7606        | 392.1762        | 10 | T      | 10 | 1181.5926       | 591.2999        | 394.5357        |
|         | 1341.5123       | 671.2598        | 447.8423        | 11 | S[167] | 9  | 1080.5449       | 540.7761        | 360.8531        |
|         | 1438.5651       | 719.7862        | 480.1932        | 12 | P      | 8  | 913.5465        | 457.2769        | 305.1870        |
|         | 1537.6335       | 769.3204        | 513.2160        | 13 | V      | 7  | 816.4938        | 408.7505        | 272.8361        |
|         | 1665.7285       | 833.3679        | 555.9143        | 14 | K      | 6  | 717.4254        | 359.2163        | 239.8133        |
|         | 1794.7711       | 897.8892        | 598.9285        | 15 | E      | 5  | 589.3304        | 295.1688        | 197.1150        |
|         | 1895.8187       | 948.4130        | 632.6111        | 16 | T      | 4  | 460.2878        | 230.6475        | 154.1008        |
|         | 2008.9028       | 1004.9550       | 670.3058        | 17 | I      | 3  | 359.2401        | 180.1237        | 120.4182        |
|         | 2079.9399       | 1040.4736       | 693.9848        | 18 | A      | 2  | 246.1561        | 123.5817        | 82.7235         |
|         |                 |                 |                 | 19 | R      | 1  | 175.1190        | 88.0631         | 59.0445         |

# Annotated spectra from Saleem et. al. 2009

R.K<sub>136</sub>SS<sub>167</sub>FGSDGNTAYST<sub>181</sub>PLNSPGLSK<sub>136</sub>-L/3

0.8613

1e+04

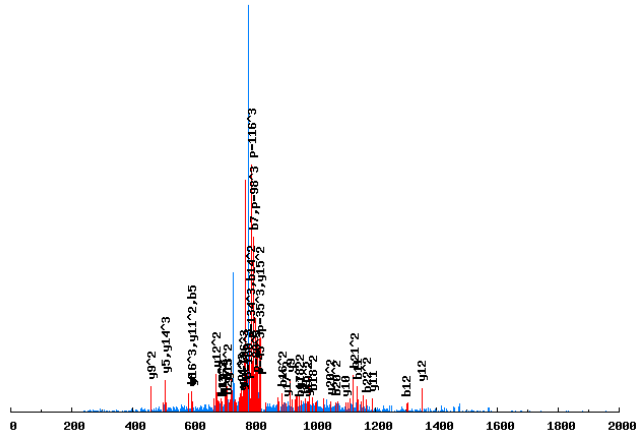

| Library | b <sup>1+</sup>  | b <sup>2+</sup>  | b <sup>3+</sup> | #  | AA     | #  | y <sup>1+</sup>  | y <sup>2+</sup>  | y <sup>3+</sup> |
|---------|------------------|------------------|-----------------|----|--------|----|------------------|------------------|-----------------|
|         | 137.1164         | 69.0619          | 46.3770         | 1  | K[136] | 23 |                  |                  |                 |
|         | 224.1485         | 112.5779         | 75.3877         | 2  | S      | 22 | 2354.9669        | 1177.9871        | 785.6605        |
|         | 391.1468         | 196.0771         | 131.0538        | 3  | S[167] | 21 | 2267.9348        | 1134.4711        | <b>756.6498</b> |
|         | 538.2152         | 269.6113         | 180.0766        | 4  | F      | 20 | 2100.9365        | <b>1050.9719</b> | 700.9837        |
|         | <b>595.2367</b>  | 298.1220         | 199.0838        | 5  | G      | 19 | 1953.8681        | <b>977.4377</b>  | 651.9609        |
|         | 682.2687         | 341.6380         | 228.0944        | 6  | S      | 18 | 1896.8466        | <b>948.9269</b>  | 632.9537        |
|         | <b>797.2957</b>  | 399.1515         | 266.4367        | 7  | D      | 17 | 1809.8146        | <b>905.4109</b>  | 603.9430        |
|         | 854.3171         | 427.6622         | 285.4439        | 8  | G      | 16 | 1694.7876        | 847.8975         | 565.6007        |
|         | <b>968.3601</b>  | 484.6837         | 323.4582        | 9  | N      | 15 | 1637.7662        | <b>819.3867</b>  | 546.5936        |
|         | 1069.4077        | 535.2075         | 357.1408        | 10 | T      | 14 | 1523.7232        | <b>762.3653</b>  | <b>508.5793</b> |
|         | <b>1140.4448</b> | 570.7261         | 380.8198        | 11 | A      | 13 | 1422.6756        | <b>711.8414</b>  | 474.8967        |
|         | <b>1303.5082</b> | 652.2577         | 435.1742        | 12 | Y      | 12 | <b>1351.6385</b> | <b>676.3229</b>  | 451.2177        |
|         | 1390.5402        | <b>695.7737</b>  | 464.1849        | 13 | S      | 11 | <b>1188.5751</b> | <b>594.7912</b>  | 396.8632        |
|         | 1571.5542        | <b>786.2808</b>  | 524.5229        | 14 | T[181] | 10 | <b>1101.5431</b> | 551.2752         | 367.8526        |
|         | 1668.6070        | 834.8071         | 556.8738        | 15 | P      | 9  | <b>920.5291</b>  | <b>460.7682</b>  | 307.5145        |
|         | 1781.6910        | <b>891.3492</b>  | <b>594.5685</b> | 16 | L      | 8  | 823.4763         | 412.2418         | 275.1636        |
|         | 1895.7340        | <b>948.3706</b>  | 632.5828        | 17 | N      | 7  | <b>710.3923</b>  | 355.6998         | 237.4689        |
|         | 1982.7660        | <b>991.8866</b>  | 661.5935        | 18 | S      | 6  | <b>596.3493</b>  | 298.6783         | 199.4546        |
|         | 2079.8188        | 1040.4130        | <b>693.9444</b> | 19 | P      | 5  | <b>509.3173</b>  | 255.1623         | 170.4440        |
|         | 2136.8402        | <b>1068.9238</b> | <b>712.9516</b> | 20 | G      | 4  | 412.2645         | 206.6359         | 138.0930        |
|         | 2249.9243        | <b>1125.4658</b> | 750.6463        | 21 | L      | 3  | 355.2431         | 178.1252         | 119.0859        |
|         | 2336.9563        | <b>1168.9818</b> | 779.6570        | 22 | S      | 2  | 242.1590         | 121.5832         | 81.3912         |
|         |                  |                  |                 | 23 | K[136] | 1  | 155.1270         | 78.0671          | 52.3805         |

# Annotated spectra from Saleem et. al. 2009

R.K<sub>136</sub>SS<sub>167</sub>LETIVEK<sub>136</sub>-K/2

0.9971

1e+04

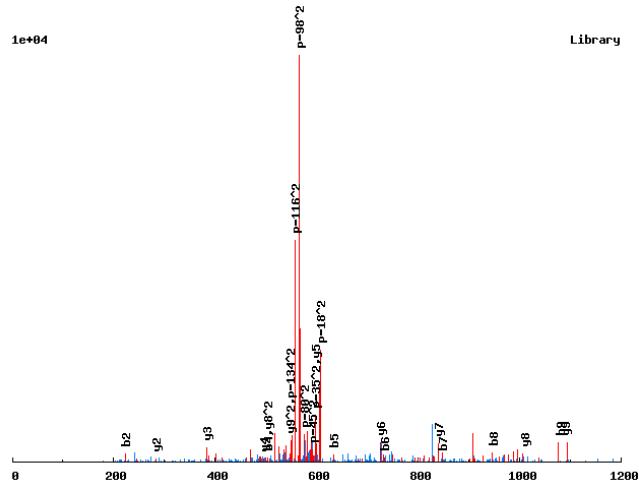

| Library | b <sup>1+</sup>  | b <sup>2+</sup> | #  | AA     | #  | y <sup>1+</sup>  | y <sup>2+</sup> |
|---------|------------------|-----------------|----|--------|----|------------------|-----------------|
|         | 137.1164         | 69.0619         | 1  | K[136] | 10 |                  |                 |
|         | <b>224.1485</b>  | 112.5779        | 2  | S      | 9  | <b>1093.5268</b> | <b>547.2670</b> |
|         | 391.1468         | 196.0771        | 3  | S[167] | 8  | 1006.4948        | 503.7510        |
|         | <b>504.2309</b>  | 252.6191        | 4  | L      | 7  | <b>839.4964</b>  | 420.2518        |
|         | <b>633.2735</b>  | 317.1404        | 5  | E      | 6  | <b>726.4123</b>  | 363.7098        |
|         | <b>734.3212</b>  | 367.6642        | 6  | T      | 5  | <b>597.3697</b>  | 299.1885        |
|         | <b>847.4052</b>  | 424.2063        | 7  | I      | 4  | <b>496.3221</b>  | 248.6647        |
|         | <b>946.4736</b>  | 473.7405        | 8  | V      | 3  | <b>383.2380</b>  | 192.1226        |
|         | <b>1075.5162</b> | 538.2618        | 9  | E      | 2  | <b>284.1696</b>  | 142.5884        |
|         |                  |                 | 10 | K[136] | 1  | 155.1270         | 78.0671         |

# Annotated spectra from Saleem et. al. 2009

K.KSS<sub>167</sub>PATKVPSPKDR.N/4

0.8263

1e+04

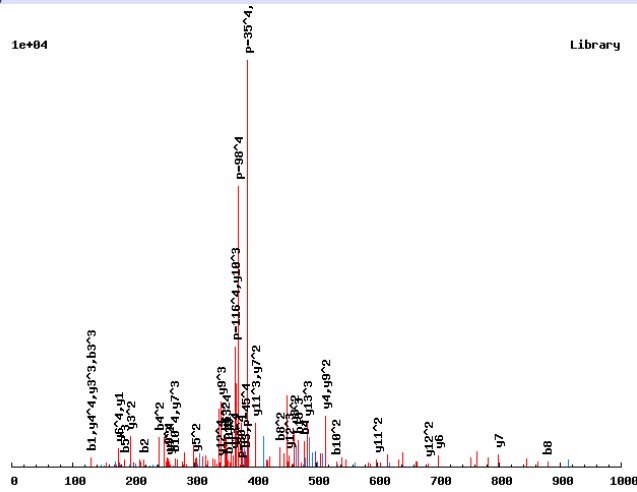

Library

|  | b <sup>1+</sup> | b <sup>2+</sup> | b <sup>3+</sup> | b <sup>4+</sup> | #  | AA     | #  | y <sup>1+</sup> | y <sup>2+</sup> | y <sup>3+</sup> | y <sup>4+</sup> |
|--|-----------------|-----------------|-----------------|-----------------|----|--------|----|-----------------|-----------------|-----------------|-----------------|
|  | 129.1022        | 65.0548         | 43.7056         | 33.0310         | 1  | K      | 14 |                 |                 |                 |                 |
|  | 216.1343        | 108.5708        | 72.7163         | 54.7890         | 2  | S      | 13 | 1449.7097       | 725.3585        | 483.9081        | 363.1829        |
|  | 383.1326        | 192.0700        | 128.3824        | 96.5386         | 3  | S[167] | 12 | 1362.6777       | 681.8425        | 454.8974        | 341.4249        |
|  | 480.1854        | 240.5963        | 160.7333        | 120.8018        | 4  | P      | 11 | 1195.6793       | 598.3433        | 399.2313        | 299.6753        |
|  | 551.2225        | 276.1149        | 184.4124        | 138.5611        | 5  | A      | 10 | 1098.6266       | 549.8169        | 366.8804        | 275.4121        |
|  | 652.2702        | 326.6387        | 218.0949        | 163.8230        | 6  | T      | 9  | 1027.5894       | 514.2984        | 343.2013        | 257.6528        |
|  | 780.3651        | 390.6862        | 260.7932        | 195.8467        | 7  | K      | 8  | 926.5418        | 463.7745        | 309.5188        | 232.3909        |
|  | 879.4336        | 440.2204        | 293.8160        | 220.6138        | 8  | V      | 7  | 798.4468        | 399.7270        | 266.8205        | 200.3672        |
|  | 976.4863        | 488.7468        | 326.1670        | 244.8770        | 9  | P      | 6  | 699.3784        | 350.1928        | 233.7977        | 175.6001        |
|  | 1063.5183       | 532.2628        | 355.1776        | 266.6350        | 10 | S      | 5  | 602.3256        | 301.6665        | 201.4467        | 151.3369        |
|  | 1191.6133       | 596.3103        | 397.8760        | 298.6588        | 11 | K      | 4  | 515.2936        | 258.1504        | 172.4361        | 129.5789        |
|  | 1288.6661       | 644.8367        | 430.2269        | 322.9220        | 12 | P      | 3  | 387.1986        | 194.1030        | 129.7377        | 97.5551         |
|  | 1403.6930       | 702.3501        | 468.5692        | 351.6787        | 13 | D      | 2  | 290.1459        | 145.5766        | 97.3868         | 73.2919         |
|  |                 |                 |                 |                 | 14 | R      | 1  | 175.1190        | 88.0631         | 59.0445         | 44.5352         |



# Annotated spectra from Saleem et. al. 2009

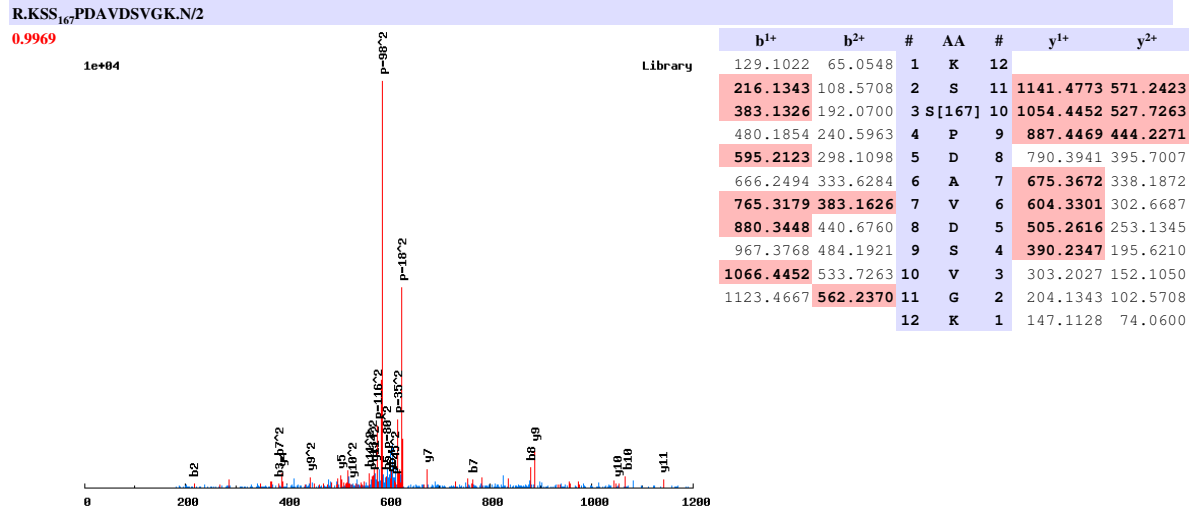

# Annotated spectra from Saleem et. al. 2009

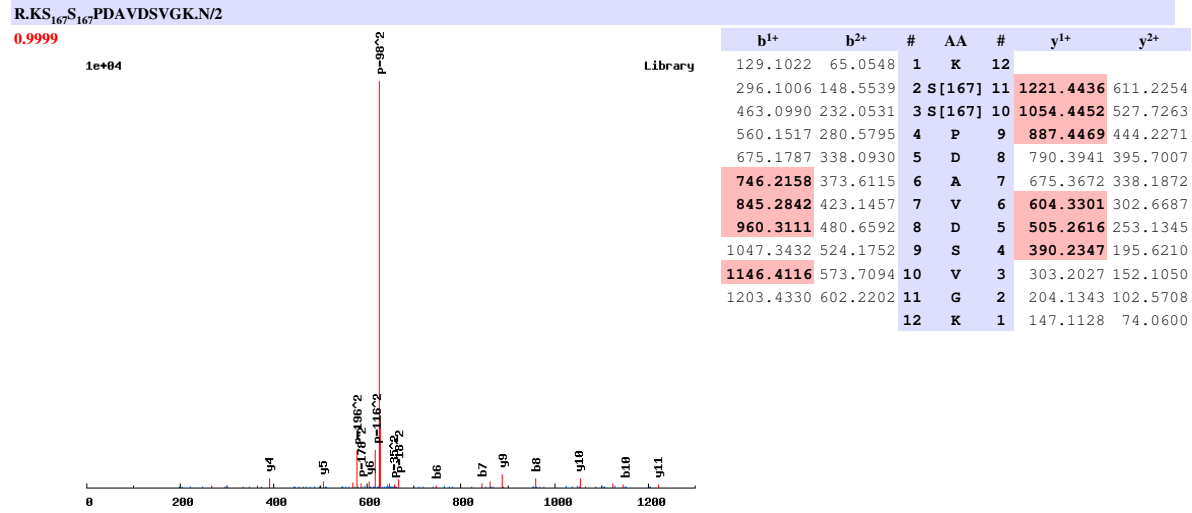

# Annotated spectra from Saleem et. al. 2009

R.K<sub>136</sub>SS<sub>167</sub>YIT<sub>181</sub>V<sub>136</sub>VDGIK<sub>136</sub>Q/2

0.9711

1e+04

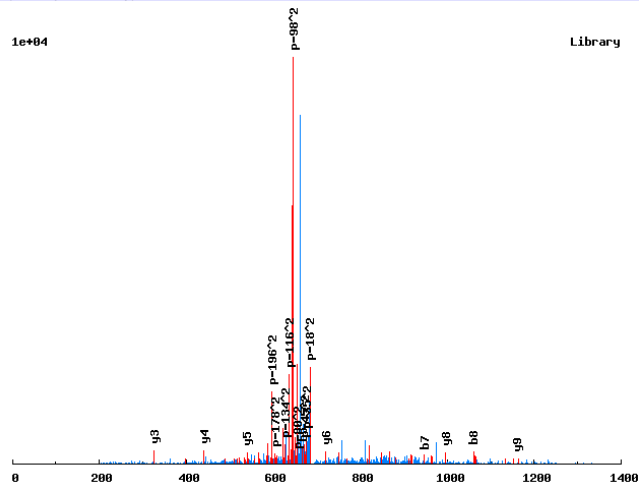

| Library | b <sup>1+</sup> | b <sup>2+</sup> | #  | AA     | #  | y <sup>1+</sup> | y <sup>2+</sup> |
|---------|-----------------|-----------------|----|--------|----|-----------------|-----------------|
|         | 137.1164        | 69.0619         | 1  | K[136] | 11 |                 |                 |
|         | 224.1485        | 112.5779        | 2  | S      | 10 | 1250.5197       | 625.7635        |
|         | 391.1468        | 196.0771        | 3  | S[167] | 9  | 1163.4876       | 582.2475        |
|         | 554.2102        | 277.6087        | 4  | Y      | 8  | 996.4893        | 498.7483        |
|         | 667.2942        | 334.1508        | 5  | I      | 7  | 833.4259        | 417.2166        |
|         | 848.3082        | 424.6578        | 6  | T[181] | 6  | 720.3419        | 360.6746        |
|         | 947.3766        | 474.1920        | 7  | V      | 5  | 539.3279        | 270.1676        |
|         | 1062.4036       | 531.7054        | 8  | D      | 4  | 440.2595        | 220.6334        |
|         | 1119.4250       | 560.2162        | 9  | G      | 3  | 325.2325        | 163.1199        |
|         | 1232.5091       | 616.7582        | 10 | I      | 2  | 268.2111        | 134.6092        |
|         |                 |                 | 11 | K[136] | 1  | 155.1270        | 78.0671         |

# Annotated spectra from Saleem et. al. 2009

K.K<sub>136</sub>TES<sub>167</sub>PLENVAELK<sub>136</sub>K<sub>136</sub>E/3

0.9993

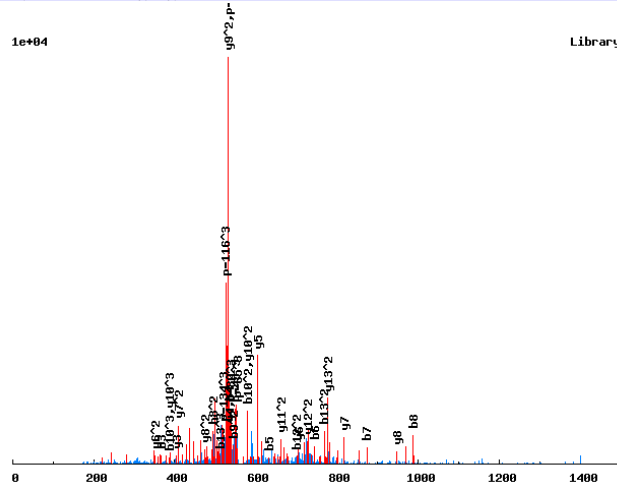

| Library | b <sup>1+</sup> | b <sup>2+</sup> | b <sup>3+</sup> | #  | AA     | #  | y <sup>1+</sup> | y <sup>2+</sup> | y <sup>3+</sup> |
|---------|-----------------|-----------------|-----------------|----|--------|----|-----------------|-----------------|-----------------|
|         | 137.1164        | 69.0619         | 46.3770         | 1  | K[136] | 14 |                 |                 |                 |
|         | 238.1641        | 119.5857        | 80.0596         | 2  | T      | 13 | 1553.7793       | 777.3933        | 518.5980        |
|         | 367.2067        | 184.1070        | 123.0738        | 3  | E      | 12 | 1452.7316       | 726.8694        | 484.9154        |
|         | 534.2051        | 267.6062        | 178.7399        | 4  | S[167] | 11 | 1323.6890       | 662.3482        | 441.9012        |
|         | 631.2578        | 316.1326        | 211.0908        | 5  | P      | 10 | 1156.6907       | 578.8490        | 386.2351        |
|         | 744.3419        | 372.6746        | 248.7855        | 6  | L      | 9  | 1059.6379       | 530.3226        | 353.8842        |
|         | 873.3845        | 437.1959        | 291.7997        | 7  | E      | 8  | 946.5538        | 473.7806        | 316.1895        |
|         | 987.4274        | 494.2173        | 329.8140        | 8  | N      | 7  | 817.5113        | 409.2593        | 273.1753        |
|         | 1086.4958       | 543.7516        | 362.8368        | 9  | V      | 6  | 703.4683        | 352.2378        | 235.1610        |
|         | 1157.5329       | 579.2701        | 386.5158        | 10 | A      | 5  | 604.3999        | 302.7036        | 202.1382        |
|         | 1286.5755       | 643.7914        | 429.5300        | 11 | E      | 4  | 533.3628        | 267.1850        | 178.4591        |
|         | 1399.6596       | 700.3334        | 467.2247        | 12 | L      | 3  | 404.3202        | 202.6637        | 135.4449        |
|         | 1535.7687       | 768.3880        | 512.5944        | 13 | K[136] | 2  | 291.2362        | 146.1217        | 97.7502         |
|         |                 |                 |                 | 14 | K[136] | 1  | 155.1270        | 78.0671         | 52.3805         |

# Annotated spectra from Saleem et. al. 2009

K.K<sub>136</sub>TLS<sub>167</sub>DS<sub>167</sub>DEDDDDVVK<sub>136</sub>K/2

0.9999

1e+04

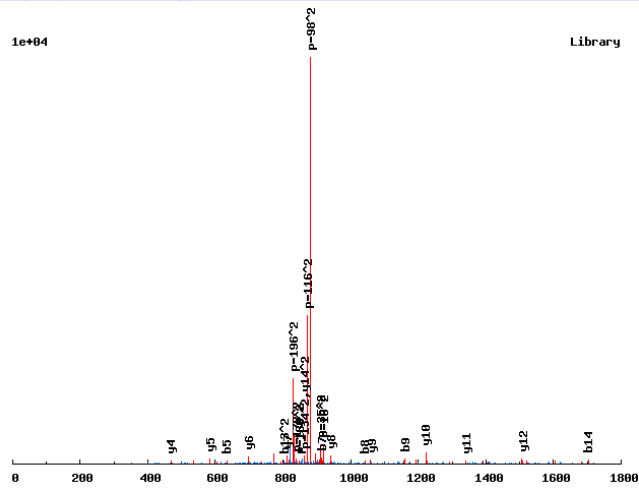

| Library | b <sup>1+</sup> | b <sup>2+</sup> | #  | AA     | #  | y <sup>1+</sup> | y <sup>2+</sup> |
|---------|-----------------|-----------------|----|--------|----|-----------------|-----------------|
|         | 137.1164        | 69.0619         | 1  | K[136] | 15 |                 |                 |
|         | 238.1641        | 119.5857        | 2  | T      | 14 | 1720.5965       | 860.8019        |
|         | 351.2482        | 176.1277        | 3  | L      | 13 | 1619.5488       | 810.2781        |
|         | 518.2465        | 259.6269        | 4  | S[167] | 12 | 1506.4648       | 753.7360        |
|         | 633.2735        | 317.1404        | 5  | D      | 11 | 1339.4664       | 670.2368        |
|         | 800.2718        | 400.6396        | 6  | S[167] | 10 | 1224.4395       | 612.7234        |
|         | 915.2988        | 458.1530        | 7  | D      | 9  | 1057.4411       | 529.2242        |
|         | 1044.3414       | 522.6743        | 8  | E      | 8  | 942.4142        | 471.7107        |
|         | 1159.3683       | 580.1878        | 9  | D      | 7  | 813.3716        | 407.1894        |
|         | 1274.3953       | 637.7013        | 10 | D      | 6  | 698.3446        | 349.6760        |
|         | 1389.4222       | 695.2147        | 11 | D      | 5  | 583.3177        | 292.1625        |
|         | 1504.4491       | 752.7282        | 12 | D      | 4  | 468.2908        | 234.6490        |
|         | 1603.5175       | 802.2624        | 13 | V      | 3  | 353.2638        | 177.1355        |
|         | 1702.5860       | 851.7966        | 14 | V      | 2  | 254.1954        | 127.6013        |
|         |                 |                 | 15 | K[136] | 1  | 155.1270        | 78.0671         |

# Annotated spectra from Saleem et. al. 2009

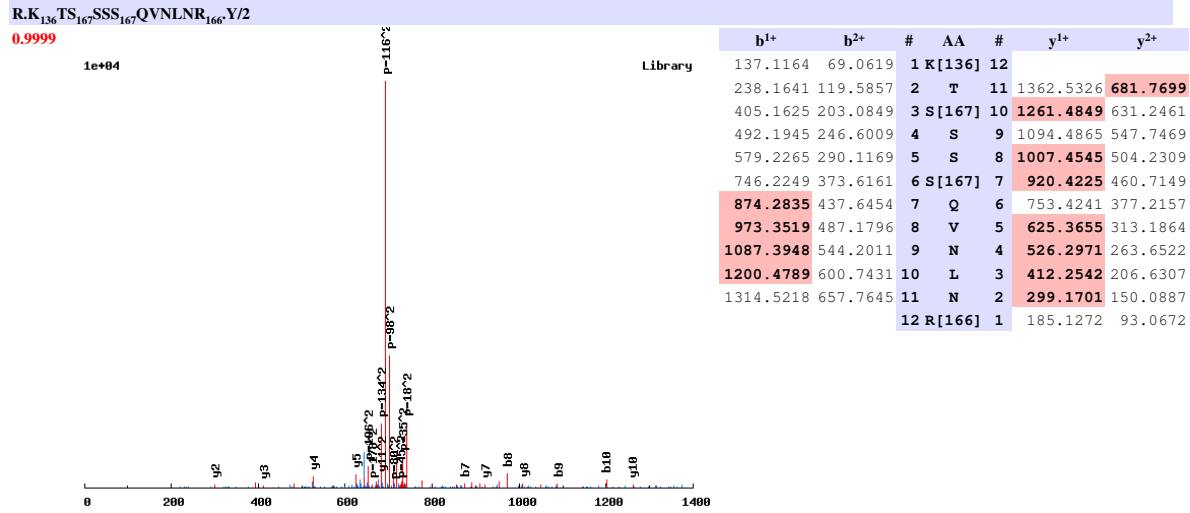

# Annotated spectra from Saleem et. al. 2009

K.K<sub>136</sub>T<sub>181</sub>STSDGK<sub>136</sub>K<sub>136</sub>R/3

0.8078

1e+04

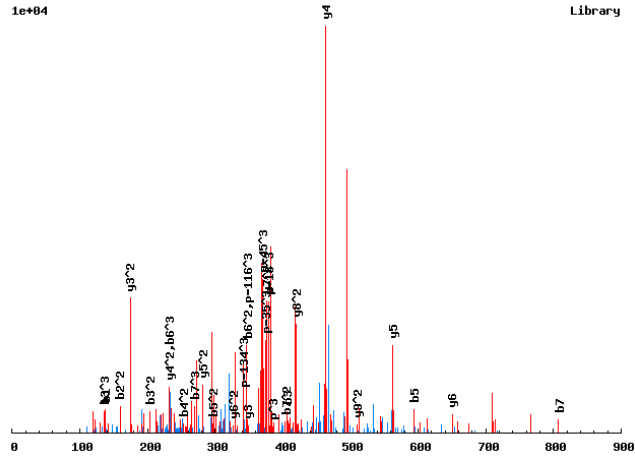

| Library | b <sup>1+</sup> | b <sup>2+</sup> | b <sup>3+</sup> | #  | AA     | #  | y <sup>1+</sup> | y <sup>2+</sup> | y <sup>3+</sup> |
|---------|-----------------|-----------------|-----------------|----|--------|----|-----------------|-----------------|-----------------|
|         | 137.1164        | 69.0619         | 46.3770         | 1  | K[136] | 10 |                 |                 |                 |
|         | 318.1304        | 159.5689        | 106.7150        | 2  | T[181] | 9  | 1018.4787       | 509.7430        | 340.1644        |
|         | 405.1625        | 203.0849        | 135.7257        | 3  | S      | 8  | 837.4647        | 419.2360        | 279.8264        |
|         | 506.2102        | 253.6087        | 169.4082        | 4  | T      | 7  | 750.4327        | 375.7200        | 250.8157        |
|         | 593.2422        | 297.1247        | 198.4189        | 5  | S      | 6  | 649.3850        | 325.1961        | 217.1332        |
|         | 692.3106        | 346.6589        | 231.4417        | 6  | V      | 5  | 562.3530        | 281.6801        | 188.1225        |
|         | 807.3375        | 404.1724        | 269.7840        | 7  | D      | 4  | 463.2846        | 232.1459        | 155.0997        |
|         | 864.3590        | 432.6831        | 288.7912        | 8  | G      | 3  | 348.2576        | 174.6324        | 116.7574        |
|         | 1000.4682       | 500.7377        | 334.1609        | 9  | K[136] | 2  | 291.2362        | 146.1217        | 97.7502         |
|         |                 |                 |                 | 10 | K[136] | 1  | 155.1270        | 78.0671         | 52.3805         |

# Annotated spectra from Saleem et. al. 2009

K.KT<sub>181</sub>T<sub>181</sub>GS<sub>167</sub>S<sub>167</sub>SS<sub>167</sub>S<sub>167</sub>S<sub>167</sub>S<sub>167</sub>S<sub>167</sub>S<sub>167</sub>K.K/2

0.6756

1e+04

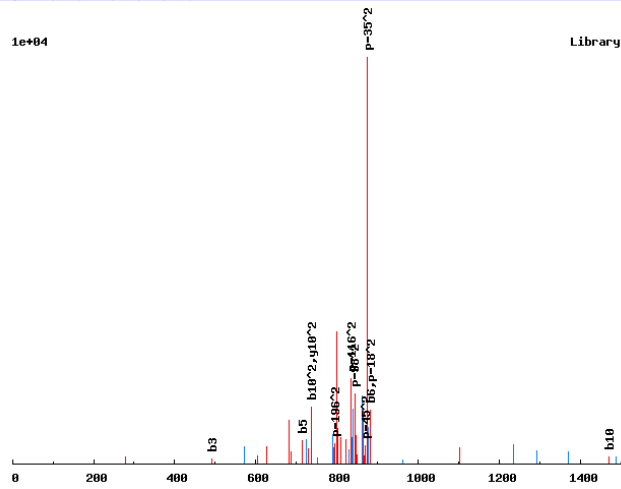

| Library | b <sup>1+</sup> | b <sup>2+</sup> | #  | AA     | #  | y <sup>1+</sup> | y <sup>2+</sup> |
|---------|-----------------|-----------------|----|--------|----|-----------------|-----------------|
|         | 129.1022        | 65.0548         | 1  | K      | 12 |                 |                 |
|         | 310.1163        | 155.5618        | 2  | T[181] | 11 | 1655.1845       | 828.0959        |
|         | 491.1303        | 246.0688        | 3  | T[181] | 10 | 1474.1705       | 737.5889        |
|         | 548.1517        | 274.5795        | 4  | G      | 9  | 1293.1565       | 647.0819        |
|         | 715.1501        | 358.0787        | 5  | S[167] | 8  | 1236.1350       | 618.5711        |
|         | 882.1484        | 441.5779        | 6  | S[167] | 7  | 1069.1366       | 535.0720        |
|         | 969.1805        | 485.0939        | 7  | S      | 6  | 902.1383        | 451.5728        |
|         | 1136.1788       | 568.5931        | 8  | S[167] | 5  | 815.1062        | 408.0568        |
|         | 1303.1772       | 652.0922        | 9  | S[167] | 4  | 648.1079        | 324.5576        |
|         | 1470.1756       | 735.5914        | 10 | S[167] | 3  | 481.1095        | 241.0584        |
|         | 1637.1739       | 819.0906        | 11 | S[167] | 2  | 314.1112        | 157.5592        |
|         |                 |                 | 12 | K      | 1  | 147.1128        | 74.0600         |



# Annotated spectra from Saleem et. al. 2009

R.KVEFTKDDDEEPS<sub>167</sub>DSEDKEHGK.F/4

0.8423

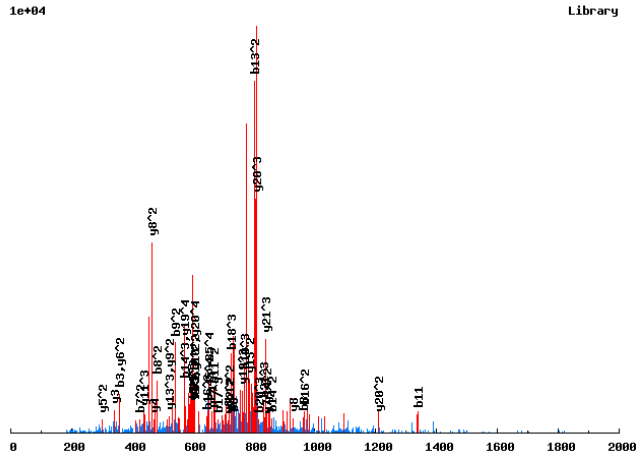

| Library | b <sup>1+</sup> | b <sup>2+</sup> | b <sup>3+</sup> | b <sup>4+</sup> | #  | AA     | #  | y <sup>1+</sup> | y <sup>2+</sup> | y <sup>3+</sup> | y <sup>4+</sup> |
|---------|-----------------|-----------------|-----------------|-----------------|----|--------|----|-----------------|-----------------|-----------------|-----------------|
|         | 129.1022        | 65.0548         | 43.7056         | 33.0310         | 1  | K      | 22 |                 |                 |                 |                 |
|         | 228.1706        | 114.5890        | 76.7284         | 57.7981         | 2  | V      | 21 | 2515.9984       | 1258.5028       | 839.3377        | 629.7551        |
|         | 357.2132        | 179.1103        | 119.7426        | 90.0588         | 3  | E      | 20 | 2416.9300       | 1208.9686       | 806.3148        | 604.9880        |
|         | 504.2816        | 252.6445        | 168.7654        | 126.8259        | 4  | F      | 19 | 2287.8874       | 1144.4473       | 763.3007        | 572.7273        |
|         | 605.3293        | 303.1683        | 202.4480        | 152.0878        | 5  | T      | 18 | 2140.8190       | 1070.9131       | 714.2778        | 535.9602        |
|         | 733.4243        | 367.2158        | 245.1463        | 184.1115        | 6  | K      | 17 | 2039.7713       | 1020.3893       | 680.5953        | 510.6983        |
|         | 848.4512        | 424.7293        | 283.4886        | 212.8683        | 7  | D      | 16 | 1911.6763       | 956.3418        | 637.8970        | 478.6745        |
|         | 963.4782        | 482.2427        | 321.8309        | 241.6250        | 8  | D      | 15 | 1796.6494       | 898.8283        | 599.5547        | 449.9178        |
|         | 1078.5051       | 539.7562        | 360.1732        | 270.3817        | 9  | D      | 14 | 1681.6225       | 841.3149        | 561.2123        | 421.1611        |
|         | 1207.5477       | 604.2775        | 403.1874        | 302.6424        | 10 | E      | 13 | 1566.5955       | 783.8014        | 522.8700        | 392.4043        |
|         | 1336.5903       | 668.7988        | 446.2016        | 334.9030        | 11 | E      | 12 | 1437.5529       | 719.2801        | 479.8558        | 360.1437        |
|         | 1433.6431       | 717.3252        | 478.5525        | 359.1662        | 12 | P      | 11 | 1308.5103       | 654.7588        | 436.8416        | 327.8830        |
|         | 1600.6414       | 800.8243        | 534.2187        | 400.9158        | 13 | S[167] | 10 | 1211.4576       | 606.2324        | 404.4907        | 303.6199        |
|         | 1715.6684       | 858.3378        | 572.5610        | 429.6725        | 14 | D      | 9  | 1044.4592       | 522.7332        | 348.8246        | 261.8703        |
|         | 1802.7004       | 901.8538        | 601.5716        | 451.4306        | 15 | S      | 8  | 929.4323        | 465.2198        | 310.4823        | 233.1135        |
|         | 1931.7430       | 966.3751        | 644.5858        | 483.6912        | 16 | E      | 7  | 842.4003        | 421.7038        | 281.4716        | 211.3555        |
|         | 2046.7699       | 1023.8886       | 682.9282        | 512.4479        | 17 | D      | 6  | 713.3577        | 357.1825        | 238.4574        | 179.0949        |
|         | 2174.8649       | 1087.9361       | 725.6265        | 544.4717        | 18 | K      | 5  | 598.3307        | 299.6690        | 200.1151        | 150.3381        |
|         | 2303.9075       | 1152.4574       | 768.6407        | 576.7323        | 19 | E      | 4  | 470.2358        | 235.6215        | 157.4168        | 118.3144        |
|         | 2440.9664       | 1220.9868       | 814.3270        | 610.9971        | 20 | H      | 3  | 341.1932        | 171.1002        | 114.4026        | 86.0538         |
|         | 2497.9878       | 1249.4976       | 833.3341        | 625.2524        | 21 | G      | 2  | 204.1343        | 102.5708        | 68.7163         | 51.7890         |
|         |                 |                 |                 |                 | 22 | K      | 1  | 147.1128        | 74.0600         | 49.7091         | 37.5337         |

# Annotated spectra from Saleem et. al. 2009

R.KVPMDS<sub>167</sub>PKLK.A/3

0.9773

1e+04

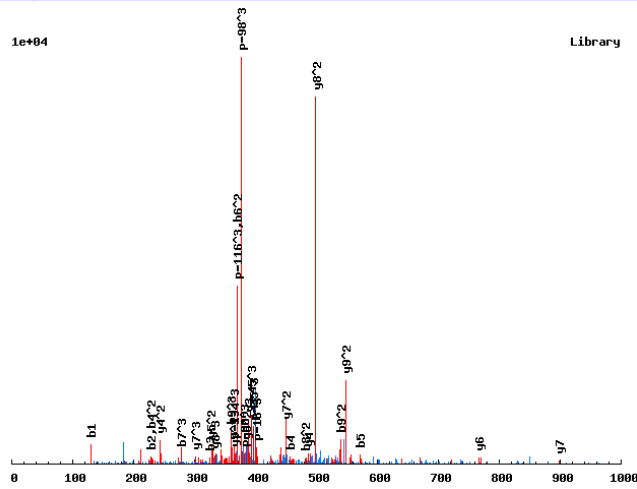

| Library | b <sup>1+</sup> | b <sup>2+</sup> | b <sup>3+</sup> | #  | AA     | #  | y <sup>1+</sup> | y <sup>2+</sup> | y <sup>3+</sup> |
|---------|-----------------|-----------------|-----------------|----|--------|----|-----------------|-----------------|-----------------|
|         | 129.1022        | 65.0548         | 43.7056         | 1  | K      | 10 |                 |                 |                 |
|         | 228.1706        | 114.5890        | 76.7284         | 2  | V      | 9  | 1094.5315       | 547.7694        | 365.5154        |
|         | 325.2234        | 163.1153        | 109.0793        | 3  | P      | 8  | 995.4631        | 498.2352        | 332.4926        |
|         | 456.2639        | 228.6356        | 152.7595        | 4  | M      | 7  | 898.4104        | 449.7088        | 300.1416        |
|         | 571.2908        | 286.1491        | 191.1018        | 5  | D      | 6  | 767.3699        | 384.1886        | 256.4615        |
|         | 738.2892        | 369.6482        | 246.7679        | 6  | S[167] | 5  | 652.3429        | 326.6751        | 218.1192        |
|         | 835.3420        | 418.1746        | 279.1188        | 7  | P      | 4  | 485.3446        | 243.1759        | 162.4530        |
|         | 963.4369        | 482.2221        | 321.8172        | 8  | K      | 3  | 388.2918        | 194.6495        | 130.1021        |
|         | 1076.5210       | 538.7641        | 359.5118        | 9  | L      | 2  | 260.1969        | 130.6021        | 87.4038         |
|         |                 |                 |                 | 10 | K      | 1  | 147.1128        | 74.0600         | 49.7091         |

# Annotated spectra from Saleem et. al. 2009

K.KVS<sub>167</sub>QESLHS<sub>167</sub>QPK.K/2

0.9729

1e+04

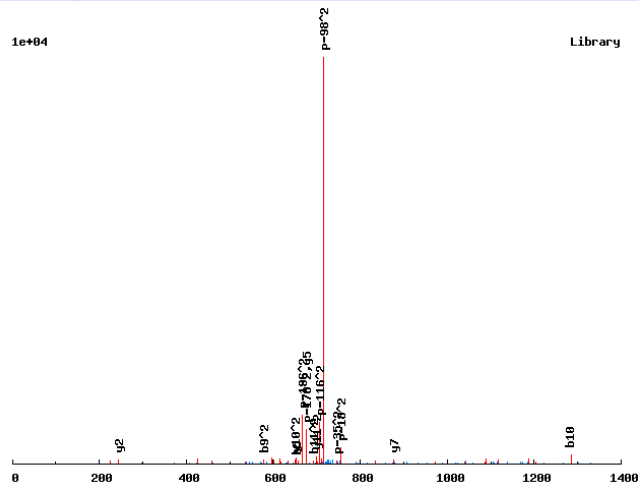

| Library | b <sup>1+</sup> | b <sup>2+</sup> | #  | AA     | #  | y <sup>1+</sup> | y <sup>2+</sup> |
|---------|-----------------|-----------------|----|--------|----|-----------------|-----------------|
|         | 129.1022        | 65.0548         | 1  | K      | 12 |                 |                 |
|         | 228.1706        | 114.5890        | 2  | V      | 11 | 1399.5654       | 700.2864        |
|         | 395.1690        | 198.0881        | 3  | S[167] | 10 | 1300.4970       | 650.7522        |
|         | 523.2276        | 262.1174        | 4  | Q      | 9  | 1133.4987       | 567.2530        |
|         | 652.2702        | 326.6387        | 5  | E      | 8  | 1005.4401       | 503.2237        |
|         | 739.3022        | 370.1547        | 6  | S      | 7  | 876.3975        | 438.7024        |
|         | 852.3863        | 426.6968        | 7  | L      | 6  | 789.3655        | 395.1864        |
|         | 989.4452        | 495.2262        | 8  | H      | 5  | 676.2814        | 338.6443        |
|         | 1156.4435       | 578.7254        | 9  | S[167] | 4  | 539.2225        | 270.1149        |
|         | 1284.5021       | 642.7547        | 10 | Q      | 3  | 372.2241        | 186.6157        |
|         | 1381.5549       | 691.2811        | 11 | P      | 2  | 244.1656        | 122.5864        |
|         |                 |                 | 12 | K      | 1  | 147.1128        | 74.0600         |

# Annotated spectra from Saleem et. al. 2009

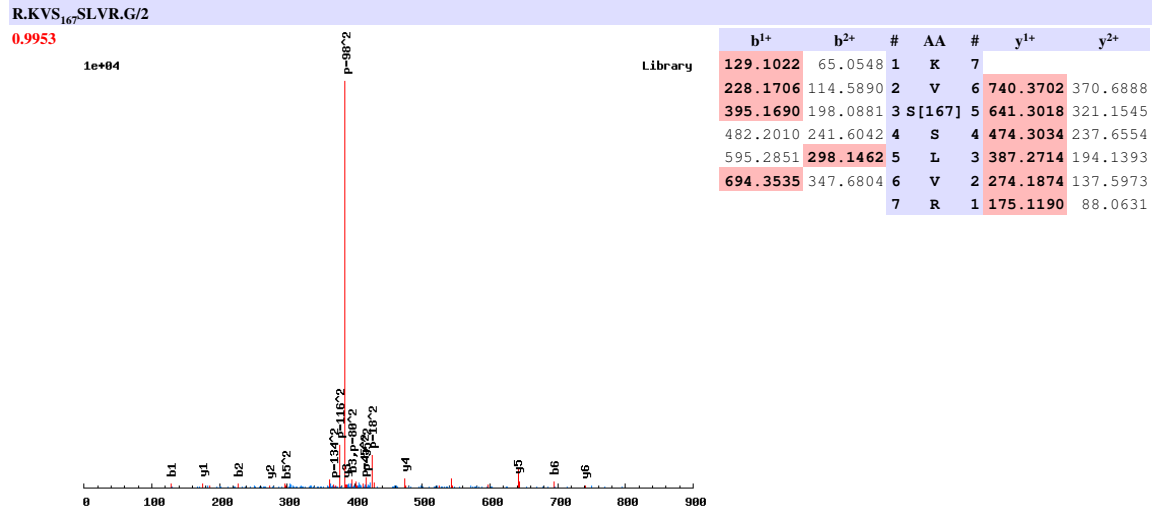

# Annotated spectra from Saleem et. al. 2009

R.K<sub>136</sub>VST<sub>181</sub>AS<sub>167</sub>AVSFGR<sub>166</sub>R/2

0.9361

1e+04

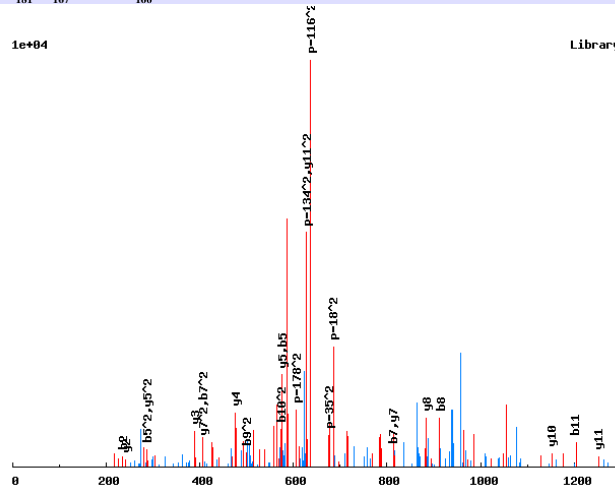

| Library | b <sup>1+</sup>  | b <sup>2+</sup> | #  | AA     | #  | y <sup>1+</sup>  | y <sup>2+</sup> |
|---------|------------------|-----------------|----|--------|----|------------------|-----------------|
|         | 137.1164         | 69.0619         | 1  | K[136] | 12 |                  |                 |
|         | <b>236.1848</b>  | 118.5961        | 2  | V      | 11 | <b>1251.5046</b> | <b>626.2559</b> |
|         | 323.2169         | 162.1121        | 3  | S      | 10 | <b>1152.4362</b> | 576.7217        |
|         | 504.2309         | 252.6191        | 4  | T[181] | 9  | 1065.4041        | 533.2057        |
|         | <b>575.2680</b>  | <b>288.1376</b> | 5  | A      | 8  | <b>884.3901</b>  | 442.6987        |
|         | 742.2664         | 371.6368        | 6  | S[167] | 7  | <b>813.3530</b>  | <b>407.1801</b> |
|         | <b>813.3035</b>  | <b>407.1554</b> | 7  | A      | 6  | 646.3546         | 323.6810        |
|         | <b>912.3719</b>  | 456.6896        | 8  | V      | 5  | <b>575.3175</b>  | <b>288.1624</b> |
|         | 999.4039         | <b>500.2056</b> | 9  | S      | 4  | <b>476.2491</b>  | 238.6282        |
|         | 1146.4723        | <b>573.7398</b> | 10 | F      | 3  | <b>389.2171</b>  | 195.1122        |
|         | <b>1203.4938</b> | 602.2505        | 11 | G      | 2  | <b>242.1487</b>  | 121.5780        |
|         |                  |                 | 12 | R[166] | 1  | 185.1272         | 93.0672         |

# Annotated spectra from Saleem et. al. 2009

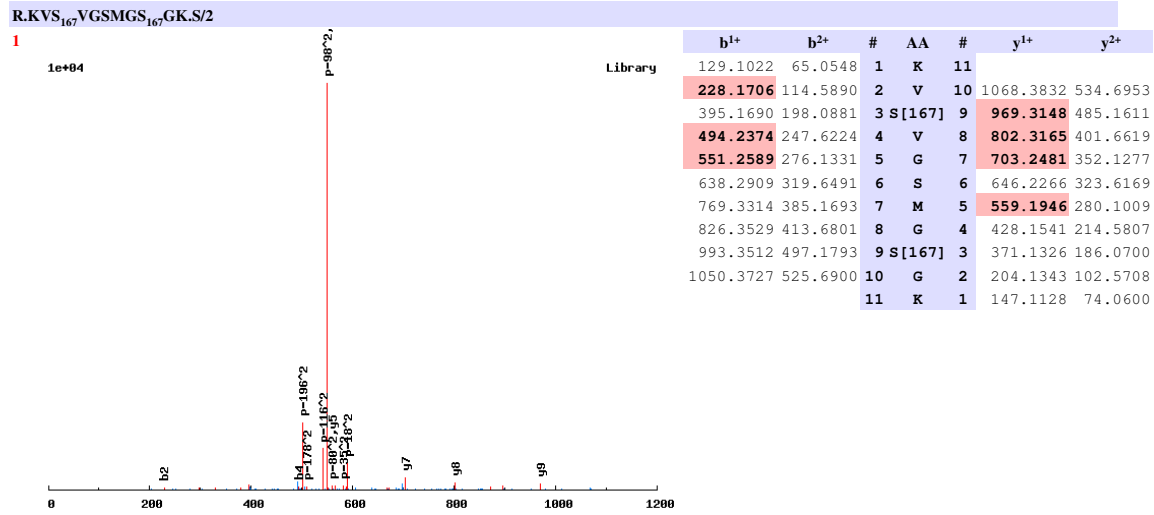

# Annotated spectra from Saleem et. al. 2009

R.KVS<sub>167</sub>VGS<sub>167</sub>M<sub>147</sub>GS<sub>167</sub>GK.S/2

0.9236

1e+04

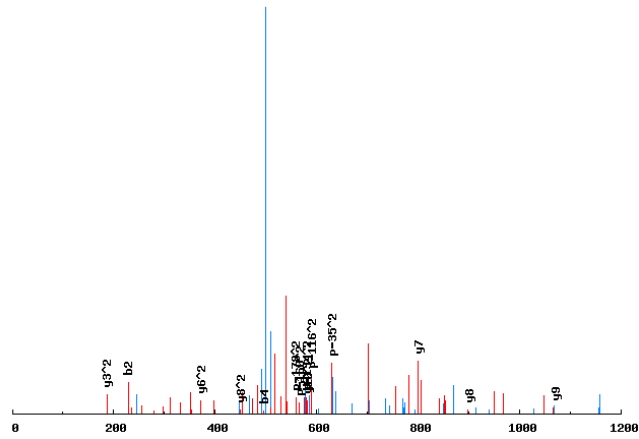

| Library | b <sup>1+</sup> | b <sup>2+</sup> | #  | AA     | #  | y <sup>1+</sup> | y <sup>2+</sup> |
|---------|-----------------|-----------------|----|--------|----|-----------------|-----------------|
|         | 129.1022        | 65.0548         | 1  | K      | 11 |                 |                 |
|         | 228.1706        | 114.5890        | 2  | V      | 10 | 1164.3445       | 582.6759        |
|         | 395.1690        | 198.0881        | 3  | S[167] | 9  | 1065.2761       | 533.1417        |
|         | 494.2374        | 247.6224        | 4  | V      | 8  | 898.2777        | 449.6425        |
|         | 551.2589        | 276.1331        | 5  | G      | 7  | 799.2093        | 400.1083        |
|         | 718.2572        | 359.6323        | 6  | S[167] | 6  | 742.1878        | 371.5976        |
|         | 865.2926        | 433.1500        | 7  | M[147] | 5  | 575.1895        | 288.0984        |
|         | 922.3141        | 461.6607        | 8  | G      | 4  | 428.1541        | 214.5807        |
|         | 1089.3125       | 545.1599        | 9  | S[167] | 3  | 371.1326        | 186.0700        |
|         | 1146.3339       | 573.6706        | 10 | G      | 2  | 204.1343        | 102.5708        |
|         |                 |                 | 11 | K      | 1  | 147.1128        | 74.0600         |

# Annotated spectra from Saleem et. al. 2009

K.KVT<sub>181</sub>ELS<sub>167</sub>LNK.C/2

0.9401

1e+04

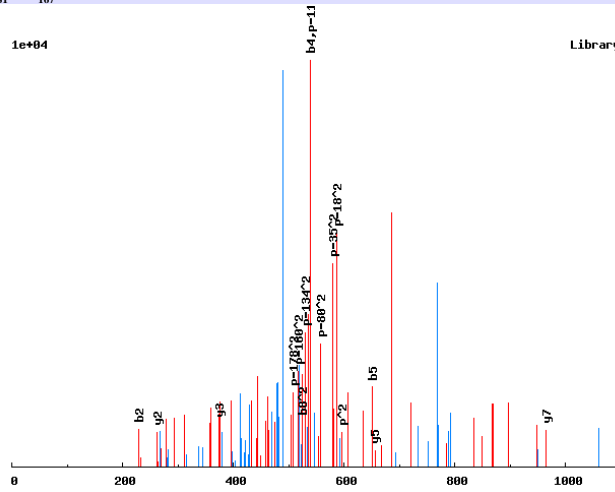

| Library | b <sup>1+</sup> | b <sup>2+</sup> | # | AA      | # | y <sup>1+</sup> | y <sup>2+</sup> |
|---------|-----------------|-----------------|---|---------|---|-----------------|-----------------|
|         | 129.1022        | 65.0548         | 1 | K       | 9 |                 |                 |
|         | 228.1706        | 114.5890        | 2 | V       | 8 | 1063.4472       | 532.2273        |
|         | 409.1847        | 205.0960        | 3 | T [181] | 7 | 964.3788        | 482.6930        |
|         | 538.2273        | 269.6173        | 4 | E       | 6 | 783.3648        | 392.1860        |
|         | 651.3113        | 326.1593        | 5 | L       | 5 | 654.3222        | 327.6647        |
|         | 818.3097        | 409.6585        | 6 | S [167] | 4 | 541.2382        | 271.1227        |
|         | 931.3937        | 466.2005        | 7 | L       | 3 | 374.2398        | 187.6235        |
|         | 1045.4367       | 523.2220        | 8 | N       | 2 | 261.1557        | 131.0815        |
|         |                 |                 | 9 | K       | 1 | 147.1128        | 74.0600         |



# Annotated spectra from Saleem et. al. 2009

R.K<sub>136</sub>YEVNFDI<sub>181</sub>DDDTDSGK<sub>136</sub>R<sub>166</sub>N/3

0.9999

1e+04

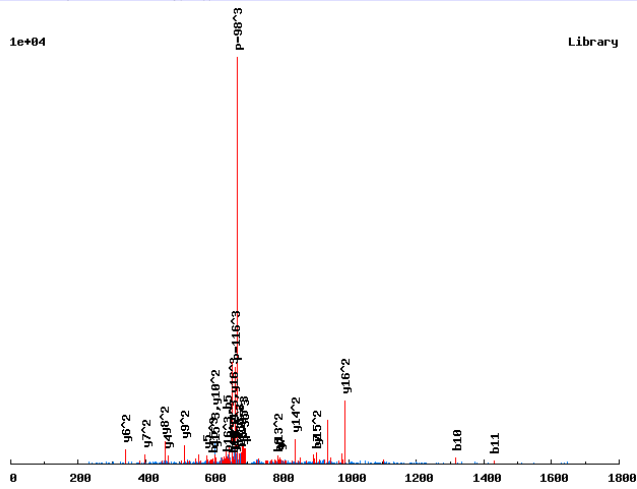

| Library | b <sup>1+</sup> | b <sup>2+</sup> | b <sup>3+</sup> | #  | AA     | #  | y <sup>1+</sup> | y <sup>2+</sup> | y <sup>3+</sup> |
|---------|-----------------|-----------------|-----------------|----|--------|----|-----------------|-----------------|-----------------|
|         | 137.1164        | 69.0619         | 46.3770         | 1  | K[136] | 17 |                 |                 |                 |
|         | 300.1798        | 150.5935        | 100.7314        | 2  | Y      | 16 | 1974.7719       | 987.8896        | 658.9288        |
|         | 429.2224        | 215.1148        | 143.7456        | 3  | E      | 15 | 1811.7086       | 906.3579        | 604.5744        |
|         | 528.2908        | 264.6490        | 176.7684        | 4  | V      | 14 | 1682.6660       | 841.8366        | 561.5602        |
|         | 642.3337        | 321.6705        | 214.7828        | 5  | N      | 13 | 1583.5976       | 792.3024        | 528.5374        |
|         | 789.4021        | 395.2047        | 263.8056        | 6  | F      | 12 | 1469.5547       | 735.2810        | 490.5231        |
|         | 904.4290        | 452.7182        | 302.1479        | 7  | D      | 11 | 1322.4863       | 661.7468        | 441.5003        |
|         | 1085.4431       | 543.2252        | 362.4859        | 8  | T[181] | 10 | 1207.4593       | 604.2333        | 403.1580        |
|         | 1200.4700       | 600.7386        | 400.8282        | 9  | D      | 9  | 1026.4453       | 513.7263        | 342.8200        |
|         | 1315.4969       | 658.2521        | 439.1705        | 10 | D      | 8  | 911.4184        | 456.2128        | 304.4776        |
|         | 1430.5239       | 715.7656        | 477.5128        | 11 | D      | 7  | 796.3914        | 398.6994        | 266.1353        |
|         | 1531.5716       | 766.2894        | 511.1954        | 12 | T      | 6  | 681.3645        | 341.1859        | 227.7930        |
|         | 1646.5985       | 823.8029        | 549.5377        | 13 | D      | 5  | 580.3168        | 290.6620        | 194.1105        |
|         | 1733.6305       | 867.3189        | 578.5484        | 14 | S      | 4  | 465.2899        | 233.1486        | 155.7681        |
|         | 1790.6520       | 895.8296        | 597.5555        | 15 | G      | 3  | 378.2578        | 189.6326        | 126.7575        |
|         | 1926.7611       | 963.8842        | 642.9252        | 16 | K[136] | 2  | 321.2364        | 161.1218        | 107.7503        |
|         |                 |                 |                 | 17 | R[166] | 1  | 185.1272        | 93.0672         | 62.3806         |

# Annotated spectra from Saleem et. al. 2009

R.KYS<sub>167</sub>DNEDEYDDADLHGFEK.K/3

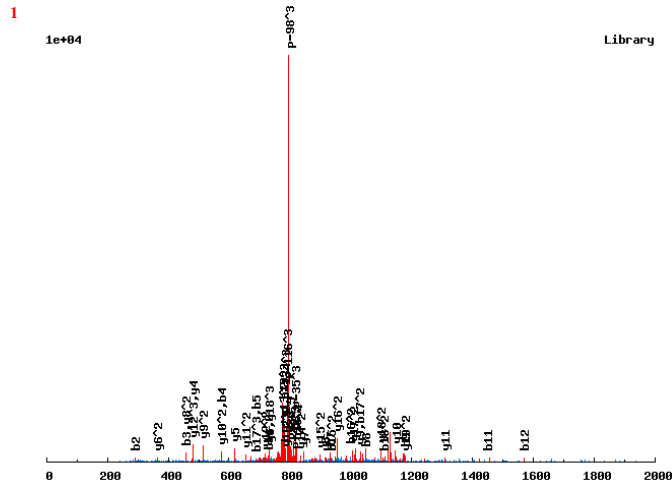

| Library | b <sup>1+</sup> | b <sup>2+</sup> | b <sup>3+</sup> | #  | AA     | #  | y <sup>1+</sup> | y <sup>2+</sup> | y <sup>3+</sup> |
|---------|-----------------|-----------------|-----------------|----|--------|----|-----------------|-----------------|-----------------|
|         | 129.1022        | 65.0548         | 43.7056         | 1  | K      | 20 |                 |                 |                 |
|         | 292.1656        | 146.5864        | 98.0600         | 2  | Y      | 19 | 2356.8401       | 1178.9237       | 786.2849        |
|         | 459.1639        | 230.0856        | 153.7262        | 3  | S[167] | 18 | 2193.7768       | 1097.3920       | 731.9304        |
|         | 574.1909        | 287.5991        | 192.0685        | 4  | D      | 17 | 2026.7784       | 1013.8928       | 676.2643        |
|         | 688.2338        | 344.6205        | 230.0828        | 5  | N      | 16 | 1911.7515       | 956.3794        | 637.9220        |
|         | 817.2764        | 409.1418        | 273.0970        | 6  | E      | 15 | 1797.7085       | 899.3579        | 599.9077        |
|         | 932.3033        | 466.6553        | 311.4393        | 7  | D      | 14 | 1668.6660       | 834.8366        | 556.8935        |
|         | 1047.3303       | 524.1688        | 349.7816        | 8  | D      | 13 | 1553.6390       | 777.3231        | 518.5512        |
|         | 1176.3729       | 588.6901        | 392.7958        | 9  | E      | 12 | 1438.6121       | 719.8097        | 480.2089        |
|         | 1339.4362       | 670.2217        | 447.1503        | 10 | Y      | 11 | 1309.5695       | 655.2884        | 437.1947        |
|         | 1454.4631       | 727.7352        | 485.4926        | 11 | D      | 10 | 1146.5062       | 573.7567        | 382.8402        |
|         | 1569.4901       | 785.2487        | 523.8349        | 12 | D      | 9  | 1031.4792       | 516.2433        | 344.4979        |
|         | 1640.5272       | 820.7672        | 547.5139        | 13 | A      | 8  | 916.4523        | 458.7298        | 306.1556        |
|         | 1755.5541       | 878.2807        | 585.8562        | 14 | D      | 7  | 845.4152        | 423.2112        | 282.4766        |
|         | 1868.6382       | 934.8227        | 623.5509        | 15 | L      | 6  | 730.3882        | 365.6978        | 244.1343        |
|         | 2005.6971       | 1003.3522       | 669.2372        | 16 | H      | 5  | 617.3042        | 309.1557        | 206.4396        |
|         | 2062.7186       | 1031.8629       | 688.2444        | 17 | G      | 4  | 480.2453        | 240.6263        | 160.7533        |
|         | 2209.7870       | 1105.3971       | 737.2672        | 18 | F      | 3  | 423.2238        | 212.1155        | 141.7461        |
|         | 2338.8296       | 1169.9184       | 780.2814        | 19 | E      | 2  | 276.1554        | 138.5813        | 92.7233         |
|         |                 |                 |                 | 20 | K      | 1  | 147.1128        | 74.0600         | 49.7091         |

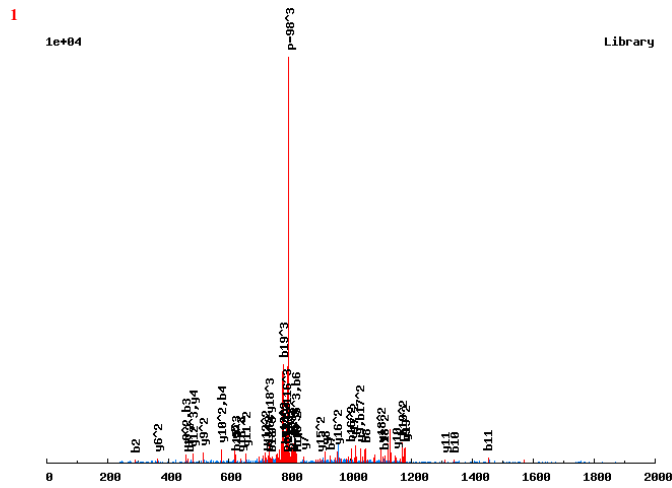

| Library | b <sup>1+</sup> | b <sup>2+</sup> | b <sup>3+</sup> | #  | AA     | #  | y <sup>1+</sup> | y <sup>2+</sup> | y <sup>3+</sup> |
|---------|-----------------|-----------------|-----------------|----|--------|----|-----------------|-----------------|-----------------|
|         | 129.1022        | 65.0548         | 43.7056         | 1  | K      | 20 |                 |                 |                 |
|         | 292.1656        | 146.5864        | 98.0600         | 2  | Y      | 19 | 2356.8401       | 1178.9237       | 786.2849        |
|         | 459.1639        | 230.0856        | 153.7262        | 3  | S[167] | 18 | 2193.7768       | 1097.3920       | 731.9304        |
|         | 574.1909        | 287.5991        | 192.0685        | 4  | D      | 17 | 2026.7784       | 1013.8928       | 676.2643        |
|         | 688.2338        | 344.6205        | 230.0828        | 5  | N      | 16 | 1911.7515       | 956.3794        | 637.9220        |
|         | 817.2764        | 409.1418        | 273.0970        | 6  | E      | 15 | 1797.7085       | 899.3579        | 599.9077        |
|         | 932.3033        | 466.6553        | 311.4393        | 7  | D      | 14 | 1668.6660       | 834.8366        | 556.8935        |
|         | 1047.3303       | 524.1688        | 349.7816        | 8  | D      | 13 | 1553.6390       | 777.3231        | 518.5512        |
|         | 1176.3729       | 588.6901        | 392.7958        | 9  | E      | 12 | 1438.6121       | 719.8097        | 480.2089        |
|         | 1339.4362       | 670.2217        | 447.1503        | 10 | Y      | 11 | 1309.5695       | 655.2884        | 437.1947        |
|         | 1454.4631       | 727.7352        | 485.4926        | 11 | D      | 10 | 1146.5062       | 573.7567        | 382.8402        |
|         | 1569.4901       | 785.2487        | 523.8349        | 12 | D      | 9  | 1031.4792       | 516.2433        | 344.4979        |
|         | 1640.5272       | 820.7672        | 547.5139        | 13 | A      | 8  | 916.4523        | 458.7298        | 306.1556        |
|         | 1755.5541       | 878.2807        | 585.8562        | 14 | D      | 7  | 845.4152        | 423.2112        | 282.4766        |
|         | 1868.6382       | 934.8227        | 623.5509        | 15 | L      | 6  | 730.3882        | 365.6978        | 244.1343        |
|         | 2005.6971       | 1003.3522       | 669.2372        | 16 | H      | 5  | 617.3042        | 309.1557        | 206.4396        |
|         | 2062.7186       | 1031.8629       | 688.2444        | 17 | G      | 4  | 480.2453        | 240.6263        | 160.7533        |
|         | 2209.7870       | 1105.3971       | 737.2672        | 18 | F      | 3  | 423.2238        | 212.1155        | 141.7461        |
|         | 2338.8296       | 1169.9184       | 780.2814        | 19 | E      | 2  | 276.1554        | 138.5813        | 92.7233         |
|         |                 |                 |                 | 20 | K      | 1  | 147.1128        | 74.0600         | 49.7091         |

# Annotated spectra from Saleem et. al. 2009

R.KYS<sub>167</sub>-GNTATGPPQDTIK.E/2

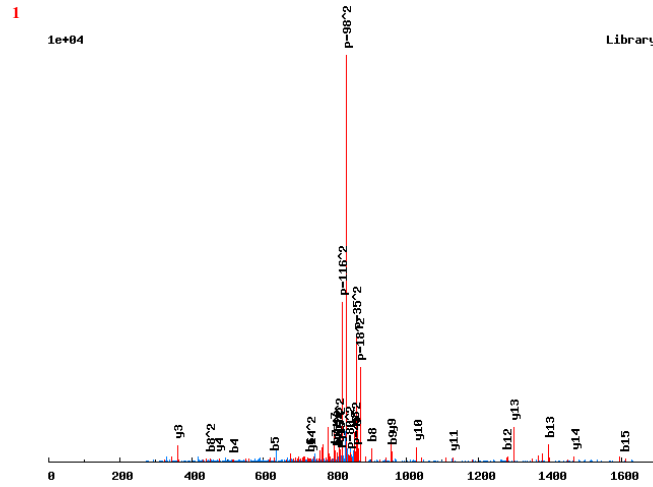

| Library | b <sup>1+</sup> | b <sup>2+</sup> | #  | AA     | #  | y <sup>1+</sup> | y <sup>2+</sup> |
|---------|-----------------|-----------------|----|--------|----|-----------------|-----------------|
|         | 129.1022        | 65.0548         | 1  | K      | 16 |                 |                 |
|         | 292.1656        | 146.5864        | 2  | Y      | 15 | 1629.7156       | 815.3614        |
|         | 459.1639        | 230.0856        | 3  | S[167] | 14 | 1466.6523       | 733.8298        |
|         | 516.1854        | 258.5963        | 4  | G      | 13 | 1299.6539       | 650.3306        |
|         | 630.2283        | 315.6178        | 5  | N      | 12 | 1242.6324       | 621.8199        |
|         | 731.2760        | 366.1416        | 6  | T      | 11 | 1128.5895       | 564.7984        |
|         | 802.3131        | 401.6602        | 7  | A      | 10 | 1027.5418       | 514.2746        |
|         | 903.3608        | 452.1840        | 8  | T      | 9  | 956.5047        | 478.7560        |
|         | 960.3823        | 480.6948        | 9  | G      | 8  | 855.4570        | 428.2322        |
|         | 1057.4350       | 529.2211        | 10 | P      | 7  | 798.4356        | 399.7214        |
|         | 1154.4878       | 577.7475        | 11 | P      | 6  | 701.3828        | 351.1951        |
|         | 1282.5464       | 641.7768        | 12 | Q      | 5  | 604.3301        | 302.6687        |
|         | 1397.5733       | 699.2903        | 13 | D      | 4  | 476.2715        | 238.6394        |
|         | 1498.6210       | 749.8141        | 14 | T      | 3  | 361.2445        | 181.1259        |
|         | 1611.7050       | 806.3562        | 15 | I      | 2  | 260.1969        | 130.6021        |
|         |                 |                 | 16 | K      | 1  | 147.1128        | 74.0600         |

# Annotated spectra from Saleem et. al. 2009

R.KY<sub>243</sub>SMSTLT<sub>181</sub>PR.D/2

0.7559

1e+04

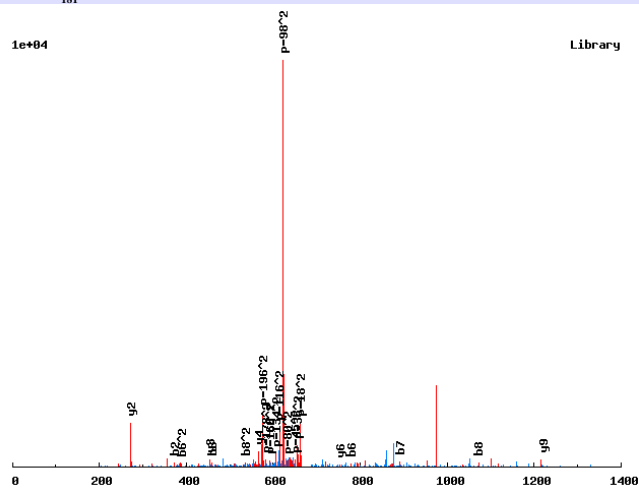

| Library | b <sup>1+</sup> | b <sup>2+</sup> | #  | AA     | #  | y <sup>1+</sup> | y <sup>2+</sup> |
|---------|-----------------|-----------------|----|--------|----|-----------------|-----------------|
|         | 129.1022        | 65.0548         | 1  | K      | 10 |                 |                 |
|         | 372.1319        | 186.5696        | 2  | Y[243] | 9  | 1215.4517       | 608.2295        |
|         | 459.1639        | 230.0856        | 3  | S      | 8  | 972.4220        | 486.7146        |
|         | 590.2044        | 295.6059        | 4  | M      | 7  | 885.3900        | 443.1986        |
|         | 677.2365        | 339.1219        | 5  | S      | 6  | 754.3495        | 377.6784        |
|         | 778.2841        | 389.6457        | 6  | T      | 5  | 667.3175        | 334.1624        |
|         | 891.3682        | 446.1877        | 7  | L      | 4  | 566.2698        | 283.6385        |
|         | 1072.3822       | 536.6947        | 8  | T[181] | 3  | 453.1857        | 227.0965        |
|         | 1169.4350       | 585.2211        | 9  | P      | 2  | 272.1717        | 136.5895        |
|         |                 |                 | 10 | R      | 1  | 175.1190        | 88.0631         |

# Annotated spectra from Saleem et. al. 2009

R.LADQT<sub>181</sub>PHDDNSENCL<sub>160</sub>PNRSGGS<sub>167</sub>T<sub>181</sub>PLDSQTK.I/3

0.64

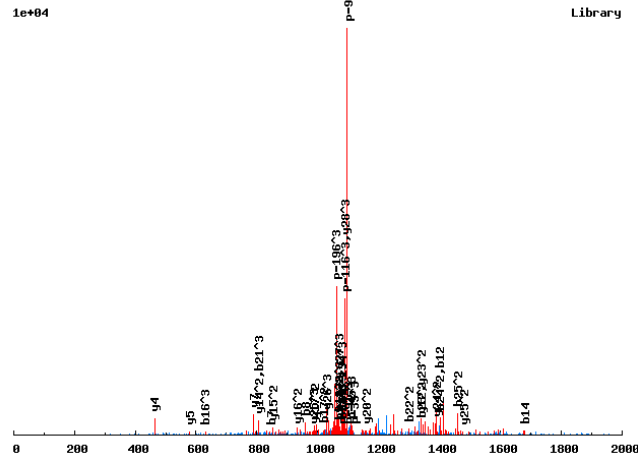

| Library | b <sup>1+</sup> | b <sup>2+</sup> | b <sup>3+</sup> | #  | AA      | #  | y <sup>1+</sup> | y <sup>2+</sup> | y <sup>3+</sup> |
|---------|-----------------|-----------------|-----------------|----|---------|----|-----------------|-----------------|-----------------|
|         | 114.0913        | 57.5493         | 38.7020         | 1  | L       | 29 |                 |                 |                 |
|         | 185.1285        | 93.0679         | 62.3810         | 2  | A       | 28 | 3268.1923       | 1634.5998       | 1090.0690       |
|         | 300.1554        | 150.5813        | 100.7233        | 3  | D       | 27 | 3197.1552       | 1599.0812       | 1066.3899       |
|         | 428.2140        | 214.6106        | 143.4095        | 4  | Q       | 26 | 3082.1282       | 1541.5678       | 1028.0476       |
|         | 609.2280        | 305.1176        | 203.7475        | 5  | T [181] | 25 | 2954.0697       | 1477.5385       | 985.3614        |
|         | 706.2807        | 353.6440        | 236.0984        | 6  | P       | 24 | 2773.0557       | 1387.0315       | 925.0234        |
|         | 843.3397        | 422.1735        | 281.7847        | 7  | H       | 23 | 2676.0029       | 1338.5051       | 892.6725        |
|         | 958.3666        | 479.6869        | 320.1271        | 8  | D       | 22 | 2538.9440       | 1269.9756       | 846.9862        |
|         | 1073.3935       | 537.2004        | 358.4694        | 9  | D       | 21 | 2423.9170       | 1212.4622       | 808.6439        |
|         | 1187.4365       | 594.2219        | 396.4837        | 10 | N       | 20 | 2308.8901       | 1154.9487       | 770.3016        |
|         | 1274.4685       | 637.7379        | 425.4944        | 11 | S       | 19 | 2194.8472       | 1097.9272       | 732.2872        |
|         | 1403.5111       | 702.2592        | 468.5085        | 12 | E       | 18 | 2107.8151       | 1054.4112       | 703.2766        |
|         | 1517.5540       | 759.2806        | 506.5229        | 13 | N       | 17 | 1978.7726       | 989.8899        | 660.2624        |
|         | 1677.5847       | 839.2960        | 559.8664        | 14 | C [160] | 16 | 1864.7296       | 932.8685        | 622.2481        |
|         | 1774.6374       | 887.8224        | 592.2173        | 15 | P       | 15 | 1704.6990       | 852.8531        | 568.9045        |
|         | 1888.6804       | 944.8438        | 630.2316        | 16 | N       | 14 | 1607.6462       | 804.3267        | 536.5536        |
|         | 2044.7815       | 1022.8944       | 682.2653        | 17 | R       | 13 | 1493.6033       | 747.3053        | 498.5393        |
|         | 2131.8135       | 1066.4104       | 711.2760        | 18 | S       | 12 | 1337.5022       | 669.2547        | 446.5056        |
|         | 2188.8350       | 1094.9211       | 730.2832        | 19 | G       | 11 | 1250.4701       | 625.7387        | 417.4949        |
|         | 2245.8564       | 1123.4318       | 749.2903        | 20 | G       | 10 | 1193.4487       | 597.2280        | 398.4877        |
|         | 2412.8548       | 1206.9310       | 804.9564        | 21 | S [167] | 9  | 1136.4272       | 568.7173        | 379.4806        |
|         | 2593.8688       | 1297.4380       | 865.2944        | 22 | T [181] | 8  | 969.4289        | 485.2181        | 323.8145        |
|         | 2690.9215       | 1345.9644       | 897.6454        | 23 | P       | 7  | 788.4149        | 394.7111        | 263.4765        |
|         | 2804.0056       | 1402.5064       | 935.3401        | 24 | L       | 6  | 691.3621        | 346.1847        | 231.1256        |
|         | 2919.0325       | 1460.0199       | 973.6824        | 25 | D       | 5  | 578.2780        | 289.6427        | 193.4309        |
|         | 3006.0646       | 1503.5359       | 1002.6930       | 26 | S       | 4  | 463.2511        | 232.1292        | 155.0885        |
|         | 3134.1232       | 1567.5652       | 1045.3792       | 27 | Q       | 3  | 376.2191        | 188.6132        | 126.0779        |
|         | 3235.1708       | 1618.0891       | 1079.0618       | 28 | T       | 2  | 248.1605        | 124.5839        | 83.3917         |
|         |                 |                 |                 | 29 | K       | 1  | 147.1128        | 74.0600         | 49.7091         |

# Annotated spectra from Saleem et. al. 2009

R.LADQTPHDDNSENC<sub>160</sub>PNR<sub>160</sub>SGGS<sub>167</sub>T<sub>181</sub>PLDSQTK<sub>136</sub>I/3

0.9248

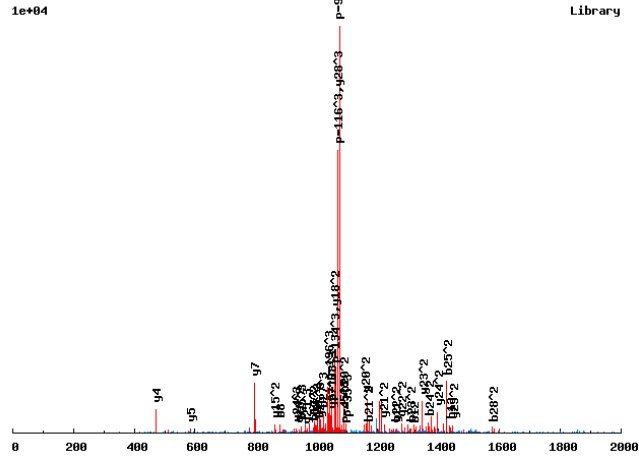

| Library | b <sup>1+</sup> | b <sup>2+</sup> | b <sup>3+</sup> | #  | AA     | #  | y <sup>1+</sup> | y <sup>2+</sup> | y <sup>3+</sup> |
|---------|-----------------|-----------------|-----------------|----|--------|----|-----------------|-----------------|-----------------|
|         | 114.0913        | 57.5493         | 38.7020         | 1  | L      | 29 |                 |                 |                 |
|         | 185.1285        | 93.0679         | 62.3810         | 2  | A      | 28 | 3206.2484       | 1603.6279       | 1069.4210       |
|         | 300.1554        | 150.5813        | 100.7233        | 3  | D      | 27 | 3135.2113       | 1568.1093       | 1045.7420       |
|         | 428.2140        | 214.6106        | 143.4095        | 4  | Q      | 26 | 3020.1844       | 1510.5958       | 1007.3996       |
|         | 529.2617        | 265.1345        | 177.0921        | 5  | T      | 25 | 2892.1258       | 1446.5665       | 964.7135        |
|         | 626.3144        | 313.6608        | 209.4430        | 6  | P      | 24 | 2791.0781       | 1396.0427       | 931.0309        |
|         | 763.3733        | 382.1903        | 255.1293        | 7  | H      | 23 | 2694.0254       | 1347.5163       | 898.6800        |
|         | 878.4003        | 439.7038        | 293.4716        | 8  | D      | 22 | 2556.9665       | 1278.9869       | 852.9937        |
|         | 993.4272        | 497.2172        | 331.8139        | 9  | D      | 21 | 2441.9395       | 1221.4734       | 814.6514        |
|         | 1107.4701       | 554.2387        | 369.8282        | 10 | N      | 20 | 2326.9126       | 1163.9599       | 776.3090        |
|         | 1194.5022       | 597.7547        | 398.8389        | 11 | S      | 19 | 2212.8696       | 1106.9385       | 738.2947        |
|         | 1323.5448       | 662.2760        | 441.8531        | 12 | E      | 18 | 2125.8376       | 1063.4224       | 709.2841        |
|         | 1437.5877       | 719.2975        | 479.8674        | 13 | N      | 17 | 1996.7950       | 998.9012        | 666.2699        |
|         | 1597.6183       | 799.3128        | 533.2110        | 14 | C[160] | 16 | 1882.7521       | 941.8797        | 628.2556        |
|         | 1694.6711       | 847.8392        | 565.5619        | 15 | P      | 15 | 1722.7214       | 861.8644        | 574.9120        |
|         | 1808.7140       | 904.8607        | 603.5762        | 16 | N      | 14 | 1625.6687       | 813.3380        | 542.5611        |
|         | 1974.8234       | 987.9153        | 658.9460        | 17 | R[166] | 13 | 1511.6257       | 756.3165        | 504.5468        |
|         | 2061.8554       | 1031.4314       | 687.9567        | 18 | S      | 12 | 1345.5164       | 673.2618        | 449.1770        |
|         | 2118.8769       | 1059.9421       | 706.9638        | 19 | G      | 11 | 1258.4843       | 629.7458        | 420.1663        |
|         | 2175.8984       | 1088.4528       | 725.9710        | 20 | G      | 10 | 1201.4629       | 601.2351        | 401.1591        |
|         | 2342.8967       | 1171.9520       | 781.6371        | 21 | S[167] | 9  | 1144.4414       | 572.7244        | 382.1520        |
|         | 2523.9107       | 1262.4590       | 841.9751        | 22 | T[181] | 8  | 977.4431        | 489.2252        | 326.4859        |
|         | 2620.9635       | 1310.9854       | 874.3260        | 23 | P      | 7  | 796.4290        | 398.7182        | 266.1479        |
|         | 2734.0475       | 1367.5274       | 912.0207        | 24 | L      | 6  | 699.3763        | 350.1918        | 233.7969        |
|         | 2849.0745       | 1425.0409       | 950.3630        | 25 | D      | 5  | 586.2922        | 293.6498        | 196.1023        |
|         | 2936.1065       | 1468.5569       | 979.3737        | 26 | S      | 4  | 471.2653        | 236.1363        | 157.7599        |
|         | 3064.1651       | 1532.5862       | 1022.0599       | 27 | Q      | 3  | 384.2333        | 192.6203        | 128.7493        |
|         | 3165.2128       | 1583.1100       | 1055.7424       | 28 | T      | 2  | 256.1747        | 128.5910        | 86.0631         |
|         |                 |                 |                 | 29 | K[136] | 1  | 155.1270        | 78.0671         | 52.3805         |

# Annotated spectra from Saleem et. al. 2009

K.LALTR<sub>166</sub>T<sub>181</sub>ES<sub>167</sub>VK<sub>136</sub>PEPEITAPPSR<sub>166</sub>F/4

0.9906

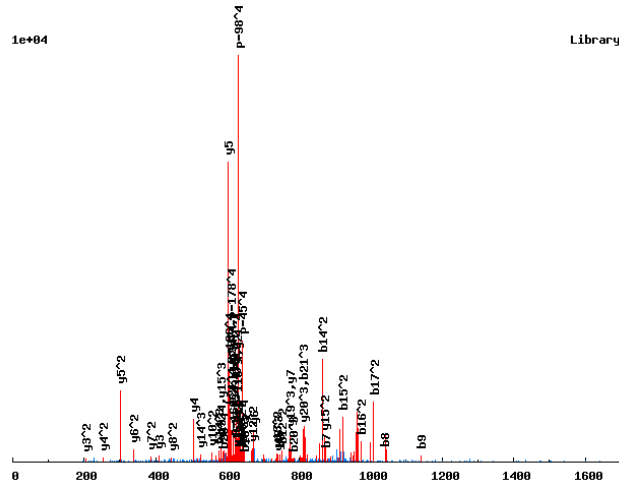

| Library | b <sup>1+</sup>  | b <sup>2+</sup>  | b <sup>3+</sup> | b <sup>4+</sup> | #  | AA     | #  | y <sup>1+</sup> | y <sup>2+</sup> | y <sup>3+</sup> | y <sup>4+</sup> |
|---------|------------------|------------------|-----------------|-----------------|----|--------|----|-----------------|-----------------|-----------------|-----------------|
|         | 114.0913         | 57.5493          | 38.7020         | 29.2783         | 1  | L      | 22 |                 |                 |                 |                 |
|         | 185.1285         | 93.0679          | 62.3810         | 47.0376         | 2  | A      | 21 | 2504.1940       | 1252.6006       | 835.4028        | <b>626.8040</b> |
|         | 298.2125         | 149.6099         | 100.0757        | 75.3086         | 3  | L      | 20 | 2433.1569       | 1217.0821       | <b>811.7238</b> | <b>609.0447</b> |
|         | 399.2602         | 200.1337         | 133.7583        | 100.5705        | 4  | T      | 19 | 2320.0728       | 1160.5400       | <b>774.0291</b> | <b>580.7737</b> |
|         | 565.3696         | 283.1884         | 189.1280        | 142.0979        | 5  | R[166] | 18 | 2219.0251       | 1110.0162       | <b>740.3466</b> | 555.5117        |
|         | <b>746.3836</b>  | 373.6954         | 249.4660        | 187.3514        | 6  | T[181] | 17 | 2052.9158       | 1026.9615       | 684.9768        | 513.9844        |
|         | <b>875.4262</b>  | 438.2167         | 292.4802        | 219.6120        | 7  | E      | 16 | 1871.9017       | 936.4545        | <b>624.6388</b> | 468.7309        |
|         | <b>1042.4245</b> | 521.7159         | 348.1464        | 261.3616        | 8  | S[167] | 15 | 1742.8592       | <b>871.9332</b> | <b>581.6246</b> | 436.4702        |
|         | <b>1141.4929</b> | 571.2501         | 381.1692        | 286.1287        | 9  | V      | 14 | 1575.8608       | 788.4340        | <b>525.9585</b> | 394.7207        |
|         | 1277.6021        | <b>639.3047</b>  | 426.5389        | 320.1560        | 10 | K[136] | 13 | 1476.7924       | <b>738.8998</b> | 492.9356        | 369.9536        |
|         | 1374.6549        | 687.8311         | 458.8898        | 344.4192        | 11 | P      | 12 | 1340.6832       | <b>670.8453</b> | 447.5659        | 335.9263        |
|         | 1503.6975        | <b>752.3524</b>  | 501.9040        | 376.6798        | 12 | E      | 11 | 1243.6305       | <b>622.3189</b> | 415.2150        | 311.6631        |
|         | 1600.7502        | 800.8787         | 534.2549        | 400.9430        | 13 | P      | 10 | 1114.5879       | <b>557.7976</b> | 372.2008        | 279.4024        |
|         | 1729.7928        | <b>865.4000</b>  | <b>577.2691</b> | 433.2037        | 14 | E      | 9  | 1017.5351       | 509.2712        | 339.8499        | 255.1392        |
|         | 1842.8769        | <b>921.9421</b>  | <b>614.9638</b> | 461.4747        | 15 | I      | 8  | 888.4925        | <b>444.7499</b> | 296.8357        | 222.8786        |
|         | 1943.9245        | <b>972.4659</b>  | <b>648.6464</b> | 486.7366        | 16 | T      | 7  | <b>775.4085</b> | <b>388.2079</b> | 259.1410        | 194.6076        |
|         | 2014.9616        | <b>1007.9845</b> | 672.3254        | 504.4959        | 17 | A      | 6  | <b>674.3608</b> | <b>337.6840</b> | 225.4584        | 169.3457        |
|         | 2112.0144        | 1056.5108        | 704.6763        | 528.7591        | 18 | P      | 5  | <b>603.3237</b> | <b>302.1655</b> | 201.7794        | 151.5864        |
|         | 2209.0672        | 1105.0372        | 737.0272        | 553.0223        | 19 | P      | 4  | <b>506.2709</b> | <b>253.6391</b> | 169.4285        | 127.3232        |
|         | 2346.1261        | 1173.5667        | <b>782.7135</b> | <b>587.2870</b> | 20 | H      | 3  | <b>409.2182</b> | <b>205.1127</b> | 137.0776        | 103.0600        |
|         | 2433.1581        | 1217.0827        | <b>811.7242</b> | <b>609.0450</b> | 21 | S      | 2  | 272.1592        | 136.5833        | 91.3913         | 68.7953         |
|         |                  |                  |                 |                 | 22 | R[166] | 1  | 185.1272        | 93.0672         | 62.3806         | 47.0373         |

# Annotated spectra from Saleem et. al. 2009

RLAPTNS<sub>167</sub>GGS<sub>167</sub>GGKLLDDPSGASSYYASHR.R/3

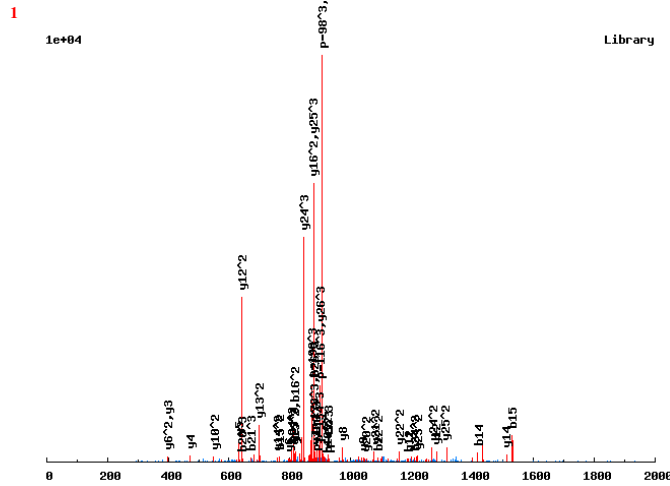

| Library | b <sup>1+</sup> | b <sup>2+</sup> | b <sup>3+</sup> | #  | AA     | #  | y <sup>1+</sup> | y <sup>2+</sup> | y <sup>3+</sup> |
|---------|-----------------|-----------------|-----------------|----|--------|----|-----------------|-----------------|-----------------|
|         | 114.0913        | 57.5493         | 38.7020         | 1  | L      | 27 |                 |                 |                 |
|         | 185.1285        | 93.0679         | 62.3810         | 2  | A      | 26 | 2699.0770       | 1350.0422       | 900.3639        |
|         | 282.1812        | 141.5942        | 94.7319         | 3  | P      | 25 | 2628.0399       | 1314.5236       | 876.6848        |
|         | 383.2289        | 192.1181        | 128.4145        | 4  | T      | 24 | 2530.9872       | 1265.9972       | 844.3339        |
|         | 497.2718        | 249.1396        | 166.4288        | 5  | N      | 23 | 2429.9395       | 1215.4734       | 810.6513        |
|         | 664.2702        | 332.6387        | 222.0949        | 6  | S[167] | 22 | 2315.8965       | 1158.4519       | 772.6370        |
|         | 721.2916        | 361.1495        | 241.1021        | 7  | G      | 21 | 2148.8982       | 1074.9527       | 716.9709        |
|         | 778.3131        | 389.6602        | 260.1092        | 8  | G      | 20 | 2091.8767       | 1046.4420       | 697.9638        |
|         | 945.3115        | 473.1594        | 315.7753        | 9  | S[167] | 19 | 2034.8553       | 1017.9313       | 678.9566        |
|         | 1002.3329       | 501.6701        | 334.7825        | 10 | G      | 18 | 1867.8569       | 934.4321        | 623.2905        |
|         | 1059.3544       | 530.1808        | 353.7896        | 11 | G      | 17 | 1810.8354       | 905.9214        | 604.2833        |
|         | 1187.4493       | 594.2283        | 396.4880        | 12 | K      | 16 | 1753.8140       | 877.4106        | 585.2762        |
|         | 1300.5334       | 650.7703        | 434.1827        | 13 | L      | 15 | 1625.7190       | 813.3632        | 542.5779        |
|         | 1415.5603       | 708.2838        | 472.5250        | 14 | D      | 14 | 1512.6350       | 756.8211        | 504.8832        |
|         | 1530.5873       | 765.7973        | 510.8673        | 15 | D      | 13 | 1397.6080       | 699.3076        | 466.5409        |
|         | 1627.6400       | 814.3237        | 543.2182        | 16 | P      | 12 | 1282.5811       | 641.7942        | 428.1985        |
|         | 1714.6721       | 857.8397        | 572.2289        | 17 | S      | 11 | 1185.5283       | 593.2678        | 395.8476        |
|         | 1771.6935       | 886.3504        | 591.2360        | 18 | G      | 10 | 1098.4963       | 549.7518        | 366.8369        |
|         | 1842.7306       | 921.8690        | 614.9151        | 19 | A      | 9  | 1041.4748       | 521.2411        | 347.8298        |
|         | 1929.7627       | 965.3850        | 643.9257        | 20 | S      | 8  | 970.4377        | 485.7225        | 324.1508        |
|         | 2016.7947       | 1008.9010       | 672.9364        | 21 | S      | 7  | 883.4057        | 442.2065        | 295.1401        |
|         | 2179.8580       | 1090.4327       | 727.2909        | 22 | Y      | 6  | 796.3737        | 398.6905        | 266.1294        |
|         | 2342.9214       | 1171.9643       | 781.6453        | 23 | Y      | 5  | 633.3103        | 317.1588        | 211.7750        |
|         | 2413.9585       | 1207.4829       | 805.3243        | 24 | A      | 4  | 470.2470        | 235.6271        | 157.4205        |
|         | 2500.9905       | 1250.9989       | 834.3350        | 25 | S      | 3  | 399.2099        | 200.1086        | 133.7415        |
|         | 2638.0494       | 1319.5283       | 880.0213        | 26 | H      | 2  | 312.1779        | 156.5926        | 104.7308        |
|         |                 |                 |                 | 27 | R      | 1  | 175.1190        | 88.0631         | 59.0445         |



# Annotated spectra from Saleem et. al. 2009

R.LAPT<sub>181</sub>NSGG<sub>S167</sub>-GGKLDPPSGASSYY<sub>243</sub>ASHR.R/3

0.7261

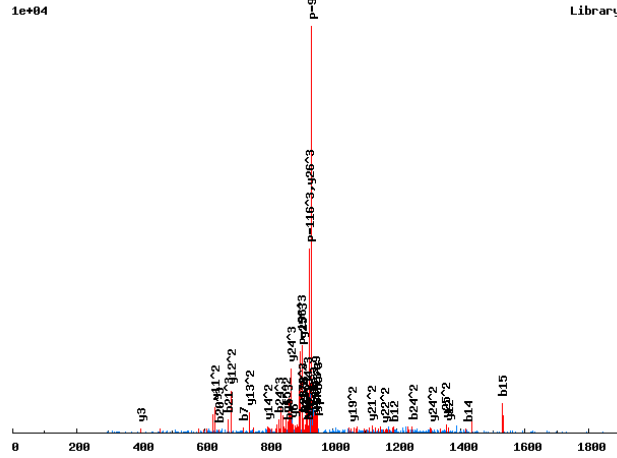

| Library | b <sup>1+</sup> | b <sup>2+</sup> | b <sup>3+</sup> | #  | AA     | #  | y <sup>1+</sup> | y <sup>2+</sup> | y <sup>3+</sup> |
|---------|-----------------|-----------------|-----------------|----|--------|----|-----------------|-----------------|-----------------|
|         | 114.0913        | 57.5493         | 38.7020         | 1  | L      | 27 |                 |                 |                 |
|         | 185.1285        | 93.0679         | 62.3810         | 2  | A      | 26 | 2779.0434       | 1390.0253       | 927.0193        |
|         | 282.1812        | 141.5942        | 94.7319         | 3  | P      | 25 | 2708.0062       | 1354.5068       | 903.3403        |
|         | 463.1952        | 232.1013        | 155.0699        | 4  | T[181] | 24 | 2610.9535       | 1305.9804       | 870.9893        |
|         | 577.2382        | 289.1227        | 193.0842        | 5  | N      | 23 | 2429.9395       | 1215.4734       | 810.6513        |
|         | 664.2702        | 332.6387        | 222.0949        | 6  | S      | 22 | 2315.8965       | 1158.4519       | 772.6370        |
|         | 721.2916        | 361.1495        | 241.1021        | 7  | G      | 21 | 2228.8645       | 1114.9359       | 743.6264        |
|         | 778.3131        | 389.6602        | 260.1092        | 8  | G      | 20 | 2171.8431       | 1086.4252       | 724.6192        |
|         | 945.3115        | 473.1594        | 315.7753        | 9  | S[167] | 19 | 2114.8216       | 1057.9144       | 705.6121        |
|         | 1002.3329       | 501.6701        | 334.7825        | 10 | G      | 18 | 1947.8232       | 974.4153        | 649.9459        |
|         | 1059.3544       | 530.1808        | 353.7896        | 11 | G      | 17 | 1890.8018       | 945.9045        | 630.9388        |
|         | 1187.4493       | 594.2283        | 396.4880        | 12 | K      | 16 | 1833.7803       | 917.3938        | 611.9316        |
|         | 1300.5334       | 650.7703        | 434.1827        | 13 | L      | 15 | 1705.6854       | 853.3463        | 569.2333        |
|         | 1415.5603       | 708.2838        | 472.5250        | 14 | D      | 14 | 1592.6013       | 796.8043        | 531.5386        |
|         | 1530.5873       | 765.7973        | 510.8673        | 15 | D      | 13 | 1477.5744       | 739.2908        | 493.1963        |
|         | 1627.6400       | 814.3237        | 543.2182        | 16 | P      | 12 | 1362.5474       | 681.7773        | 454.8540        |
|         | 1714.6721       | 857.8397        | 572.2289        | 17 | S      | 11 | 1265.4947       | 633.2510        | 422.5031        |
|         | 1771.6935       | 886.3504        | 591.2360        | 18 | G      | 10 | 1178.4626       | 589.7350        | 393.4924        |
|         | 1842.7306       | 921.8690        | 614.9151        | 19 | A      | 9  | 1121.4412       | 561.2242        | 374.4852        |
|         | 1929.7627       | 965.3850        | 643.9257        | 20 | S      | 8  | 1050.4041       | 525.7057        | 350.8062        |
|         | 2016.7947       | 1008.9010       | 672.9364        | 21 | S      | 7  | 963.3720        | 482.1897        | 321.7955        |
|         | 2179.8580       | 1090.4327       | 727.2909        | 22 | Y      | 6  | 876.3400        | 438.6736        | 292.7849        |
|         | 2422.8877       | 1211.9475       | 808.3008        | 23 | Y[243] | 5  | 713.2767        | 357.1420        | 238.4304        |
|         | 2493.9248       | 1247.4660       | 831.9798        | 24 | A      | 4  | 470.2470        | 235.6271        | 157.4205        |
|         | 2580.9568       | 1290.9821       | 860.9905        | 25 | S      | 3  | 399.2099        | 200.1086        | 133.7415        |
|         | 2718.0157       | 1359.5115       | 906.6768        | 26 | H      | 2  | 312.1779        | 156.5926        | 104.7308        |
|         |                 |                 |                 | 27 | R      | 1  | 175.1190        | 88.0631         | 59.0445         |

# Annotated spectra from Saleem et. al. 2009

R.LAS<sub>167</sub>QVSLSEGLK.V/2

0.9361

1e+04

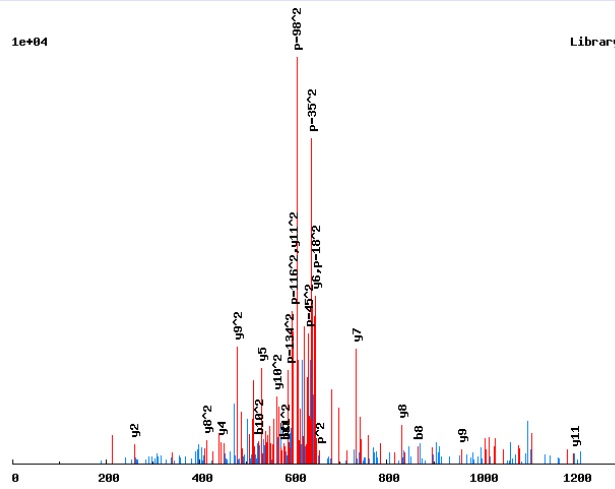

| Library | b <sup>1+</sup> | b <sup>2+</sup> | #  | AA     | #  | y <sup>1+</sup> | y <sup>2+</sup> |
|---------|-----------------|-----------------|----|--------|----|-----------------|-----------------|
|         | 114.0913        | 57.5493         | 1  | L      | 12 |                 |                 |
|         | 185.1285        | 93.0679         | 2  | A      | 11 | 1198.5715       | 599.7894        |
|         | 352.1268        | 176.5670        | 3  | S[167] | 10 | 1127.5344       | 564.2708        |
|         | 480.1854        | 240.5963        | 4  | Q      | 9  | 960.5360        | 480.7717        |
|         | 579.2538        | 290.1305        | 5  | V      | 8  | 832.4774        | 416.7424        |
|         | 666.2858        | 333.6466        | 6  | S      | 7  | 733.4090        | 367.2082        |
|         | 779.3699        | 390.1886        | 7  | L      | 6  | 646.3770        | 323.6921        |
|         | 866.4019        | 433.7046        | 8  | S      | 5  | 533.2929        | 267.1501        |
|         | 995.4445        | 498.2259        | 9  | E      | 4  | 446.2609        | 223.6341        |
|         | 1052.4660       | 526.7366        | 10 | G      | 3  | 317.2183        | 159.1128        |
|         | 1165.5500       | 583.2787        | 11 | L      | 2  | 260.1969        | 130.6021        |
|         |                 |                 | 12 | K      | 1  | 147.1128        | 74.0600         |

# Annotated spectra from Saleem et. al. 2009

R.LDDLLERS<sub>167</sub>QELTIS<sub>167</sub>KEK.L/3

0.6865

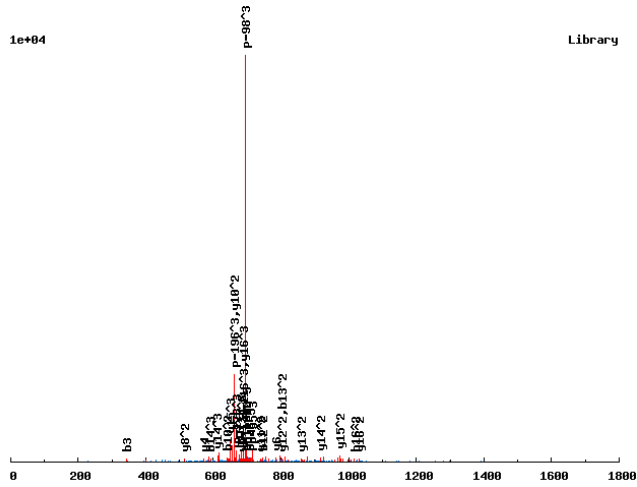

| Library | b <sup>1+</sup> | b <sup>2+</sup> | b <sup>3+</sup> | #  | AA     | #  | y <sup>1+</sup> | y <sup>2+</sup> | y <sup>3+</sup> |
|---------|-----------------|-----------------|-----------------|----|--------|----|-----------------|-----------------|-----------------|
|         | 114.0913        | 57.5493         | 38.7020         | 1  | L      | 17 |                 |                 |                 |
|         | 229.1183        | 115.0628        | 77.0443         | 2  | D      | 16 | 2063.9297       | 1032.4685       | 688.6481        |
|         | 344.1452        | 172.5762        | 115.3866        | 3  | D      | 15 | 1948.9028       | 974.9550        | 650.3058        |
|         | 457.2293        | 229.1183        | 153.0813        | 4  | L      | 14 | 1833.8759       | 917.4416        | 611.9635        |
|         | 570.3133        | 285.6603        | 190.7760        | 5  | L      | 13 | 1720.7918       | 860.8995        | 574.2688        |
|         | 699.3559        | 350.1816        | 233.7902        | 6  | E      | 12 | 1607.7077       | 804.3575        | 536.5741        |
|         | 855.4570        | 428.2322        | 285.8239        | 7  | R      | 11 | 1478.6652       | 739.8362        | 493.5599        |
|         | 1022.4554       | 511.7313        | 341.4900        | 8  | S[167] | 10 | 1322.5640       | 661.7857        | 441.5262        |
|         | 1150.5140       | 575.7606        | 384.1762        | 9  | Q      | 9  | 1155.5657       | 578.2865        | 385.8601        |
|         | 1279.5566       | 640.2819        | 427.1904        | 10 | E      | 8  | 1027.5071       | 514.2572        | 343.1739        |
|         | 1392.6406       | 696.8240        | 464.8851        | 11 | L      | 7  | 898.4645        | 449.7359        | 300.1597        |
|         | 1493.6883       | 747.3478        | 498.5676        | 12 | T      | 6  | 785.3805        | 393.1939        | 262.4650        |
|         | 1606.7724       | 803.8898        | 536.2623        | 13 | I      | 5  | 684.3328        | 342.6700        | 228.7824        |
|         | 1773.7707       | 887.3890        | 591.9284        | 14 | S[167] | 4  | 571.2487        | 286.1280        | 191.0878        |
|         | 1901.8657       | 951.4365        | 634.6268        | 15 | K      | 3  | 404.2503        | 202.6288        | 135.4216        |
|         | 2030.9083       | 1015.9578       | 677.6409        | 16 | E      | 2  | 276.1554        | 138.5813        | 92.7233         |
|         |                 |                 |                 | 17 | K      | 1  | 147.1128        | 74.0600         | 49.7091         |

# Annotated spectra from Saleem et. al. 2009

K.LDFSSS<sub>167</sub>NSHNSS<sub>167</sub>QVALDSTINK.D/3

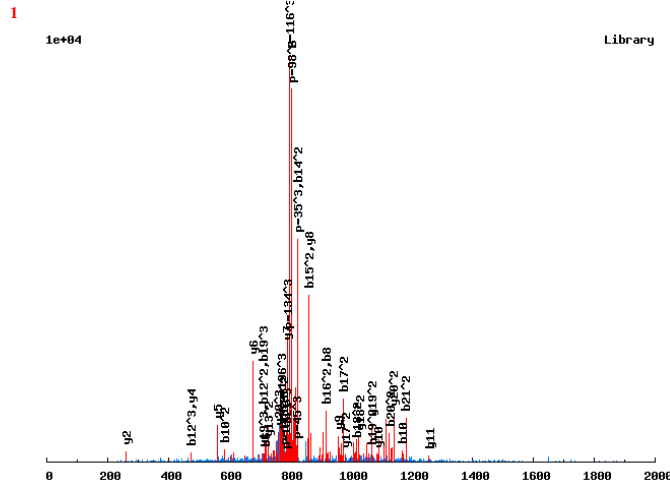

| Library | b <sup>1+</sup> | b <sup>2+</sup> | b <sup>3+</sup> | #  | AA     | #  | y <sup>1+</sup> | y <sup>2+</sup> | y <sup>3+</sup> |
|---------|-----------------|-----------------|-----------------|----|--------|----|-----------------|-----------------|-----------------|
|         | 114.0913        | 57.5493         | 38.7020         | 1  | L      | 22 |                 |                 |                 |
|         | 229.1183        | 115.0628        | 77.0443         | 2  | D      | 21 | 2397.9596       | 1199.4834       | 799.9914        |
|         | 376.1867        | 188.5970        | 126.0671        | 3  | F      | 20 | 2282.9326       | 1141.9700       | 761.6491        |
|         | 463.2187        | 232.1130        | 155.0778        | 4  | S      | 19 | 2135.8642       | 1068.4357       | 712.6263        |
|         | 550.2508        | 275.6290        | 184.0884        | 5  | S      | 18 | 2048.8322       | 1024.9197       | 683.6156        |
|         | 717.2491        | 359.1282        | 239.7546        | 6  | S[167] | 17 | 1961.8002       | 981.4037        | 654.6049        |
|         | 831.2920        | 416.1497        | 277.7689        | 7  | N      | 16 | 1794.8018       | 897.9045        | 598.9388        |
|         | 918.3241        | 459.6657        | 306.7795        | 8  | S      | 15 | 1680.7589       | 840.8831        | 560.9245        |
|         | 1055.3830       | 528.1951        | 352.4658        | 9  | H      | 14 | 1593.7268       | 797.3671        | 531.9138        |
|         | 1169.4259       | 585.2166        | 390.4802        | 10 | N      | 13 | 1456.6679       | 728.8376        | 486.2275        |
|         | 1256.4579       | 628.7326        | 419.4908        | 11 | S      | 12 | 1342.6250       | 671.8161        | 448.2132        |
|         | 1423.4563       | 712.2318        | 475.1570        | 12 | S[167] | 11 | 1255.5930       | 628.3001        | 419.2025        |
|         | 1551.5149       | 776.2611        | 517.8431        | 13 | Q      | 10 | 1088.5946       | 544.8009        | 363.5364        |
|         | 1650.5833       | 825.7953        | 550.8660        | 14 | V      | 9  | 960.5360        | 480.7717        | 320.8502        |
|         | 1721.6204       | 861.3138        | 574.5450        | 15 | A      | 8  | 861.4676        | 431.2374        | 287.8274        |
|         | 1834.7045       | 917.8559        | 612.2397        | 16 | L      | 7  | 790.4305        | 395.7189        | 264.1484        |
|         | 1949.7314       | 975.3693        | 650.5820        | 17 | D      | 6  | 677.3464        | 339.1769        | 226.4537        |
|         | 2036.7634       | 1018.8854       | 679.5927        | 18 | S      | 5  | 562.3195        | 281.6634        | 188.1114        |
|         | 2137.8111       | 1069.4092       | 713.2752        | 19 | T      | 4  | 475.2875        | 238.1474        | 159.1007        |
|         | 2250.8952       | 1125.9512       | 750.9699        | 20 | I      | 3  | 374.2398        | 187.6235        | 125.4181        |
|         | 2364.9381       | 1182.9727       | 788.9842        | 21 | N      | 2  | 261.1557        | 131.0815        | 87.7234         |
|         |                 |                 |                 | 22 | K      | 1  | 147.1128        | 74.0600         | 49.7091         |

# Annotated spectra from Saleem et. al. 2009

R.LDGSKT<sub>181</sub>PVGVHTGSALQR.V/3

0.9827

1e+04

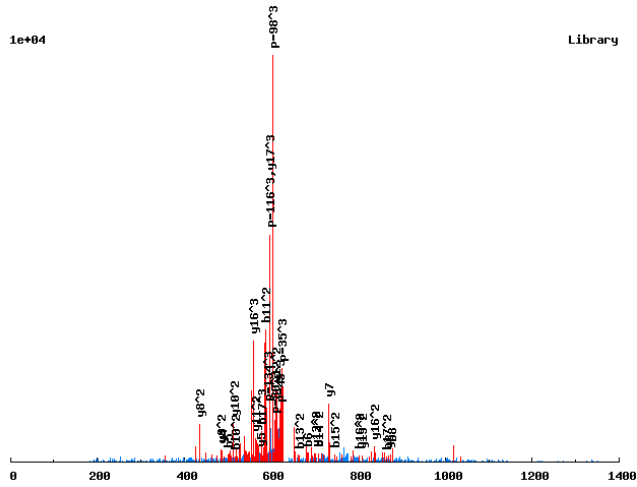

| Library | b <sup>1+</sup> | b <sup>2+</sup> | b <sup>3+</sup> | #  | AA      | #  | y <sup>1+</sup> | y <sup>2+</sup> | y <sup>3+</sup> |
|---------|-----------------|-----------------|-----------------|----|---------|----|-----------------|-----------------|-----------------|
|         | 114.0913        | 57.5493         | 38.7020         | 1  | L       | 18 |                 |                 |                 |
|         | 229.1183        | 115.0628        | 77.0443         | 2  | D       | 17 | 1789.8592       | 895.4333        | 597.2913        |
|         | 286.1397        | 143.5735        | 96.0514         | 3  | G       | 16 | 1674.8323       | 837.9198        | 558.9489        |
|         | 373.1718        | 187.0895        | 125.0621        | 4  | S       | 15 | 1617.8108       | 809.4091        | 539.9418        |
|         | 501.2667        | 251.1370        | 167.7604        | 5  | K       | 14 | 1530.7788       | 765.8930        | 510.9311        |
|         | 682.2807        | 341.6440        | 228.0984        | 6  | T [181] | 13 | 1402.6838       | 701.8456        | 468.2328        |
|         | 779.3335        | 390.1704        | 260.4494        | 7  | P       | 12 | 1221.6698       | 611.3386        | 407.8948        |
|         | 878.4019        | 439.7046        | 293.4722        | 8  | V       | 11 | 1124.6171       | 562.8122        | 375.5439        |
|         | 935.4234        | 468.2153        | 312.4793        | 9  | G       | 10 | 1025.5486       | 513.2780        | 342.5211        |
|         | 1034.4918       | 517.7495        | 345.5021        | 10 | V       | 9  | 968.5272        | 484.7672        | 323.5139        |
|         | 1171.5507       | 586.2790        | 391.1884        | 11 | H       | 8  | 869.4588        | 435.2330        | 290.4911        |
|         | 1272.5984       | 636.8028        | 424.8710        | 12 | T       | 7  | 732.3999        | 366.7036        | 244.8048        |
|         | 1329.6198       | 665.3136        | 443.8781        | 13 | G       | 6  | 631.3522        | 316.1797        | 211.1223        |
|         | 1416.6519       | 708.8296        | 472.8888        | 14 | S       | 5  | 574.3307        | 287.6690        | 192.1151        |
|         | 1487.6890       | 744.3481        | 496.5678        | 15 | A       | 4  | 487.2987        | 244.1530        | 163.1044        |
|         | 1600.7730       | 800.8902        | 534.2625        | 16 | L       | 3  | 416.2616        | 208.6344        | 139.4254        |
|         | 1728.8316       | 864.9194        | 576.9487        | 17 | Q       | 2  | 303.1775        | 152.0924        | 101.7307        |
|         |                 |                 |                 | 18 | R       | 1  | 175.1190        | 88.0631         | 59.0445         |

# Annotated spectra from Saleem et. al. 2009

R.LDGS<sub>167</sub>KTPVGVHTGS<sub>167</sub>ALQR.V/3

0.8026

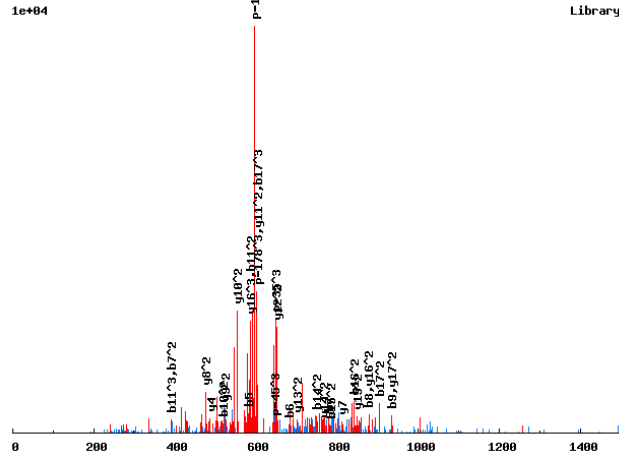

| Library | b <sup>1+</sup> | b <sup>2+</sup> | b <sup>3+</sup> | #  | AA     | #  | y <sup>1+</sup> | y <sup>2+</sup> | y <sup>3+</sup> |
|---------|-----------------|-----------------|-----------------|----|--------|----|-----------------|-----------------|-----------------|
|         | 114.0913        | 57.5493         | 38.7020         | 1  | L      | 18 |                 |                 |                 |
|         | 229.1183        | 115.0628        | 77.0443         | 2  | D      | 17 | 1869.8256       | 935.4164        | 623.9467        |
|         | 286.1397        | 143.5735        | 96.0514         | 3  | G      | 16 | 1754.7986       | 877.9029        | 585.6044        |
|         | 453.1381        | 227.0727        | 151.7176        | 4  | S[167] | 15 | 1697.7772       | 849.3922        | 566.5972        |
|         | 581.2331        | 291.1202        | 194.4159        | 5  | K      | 14 | 1530.7788       | 765.8930        | 510.9311        |
|         | 682.2807        | 341.6440        | 228.0984        | 6  | T      | 13 | 1402.6838       | 701.8456        | 468.2328        |
|         | 779.3335        | 390.1704        | 260.4494        | 7  | P      | 12 | 1301.6362       | 651.3217        | 434.5502        |
|         | 878.4019        | 439.7046        | 293.4722        | 8  | V      | 11 | 1204.5834       | 602.7953        | 402.1993        |
|         | 935.4234        | 468.2153        | 312.4793        | 9  | G      | 10 | 1105.5150       | 553.2611        | 369.1765        |
|         | 1034.4918       | 517.7495        | 345.5021        | 10 | V      | 9  | 1048.4935       | 524.7504        | 350.1694        |
|         | 1171.5507       | 586.2790        | 391.1884        | 11 | H      | 8  | 949.4251        | 475.2162        | 317.1466        |
|         | 1272.5984       | 636.8028        | 424.8710        | 12 | T      | 7  | 812.3662        | 406.6867        | 271.4603        |
|         | 1329.6198       | 665.3136        | 443.8781        | 13 | G      | 6  | 711.3185        | 356.1629        | 237.7777        |
|         | 1496.6182       | 748.8127        | 499.5443        | 14 | S[167] | 5  | 654.2971        | 327.6522        | 218.7705        |
|         | 1567.6553       | 784.3313        | 523.2233        | 15 | A      | 4  | 487.2987        | 244.1530        | 163.1044        |
|         | 1680.7394       | 840.8733        | 560.9180        | 16 | L      | 3  | 416.2616        | 208.6344        | 139.4254        |
|         | 1808.7979       | 904.9026        | 603.6042        | 17 | Q      | 2  | 303.1775        | 152.0924        | 101.7307        |
|         |                 |                 |                 | 18 | R      | 1  | 175.1190        | 88.0631         | 59.0445         |

# Annotated spectra from Saleem et. al. 2009

R.LDQS<sub>167</sub>SNS<sub>167</sub>LQK.T/2

0.7547

1e+04

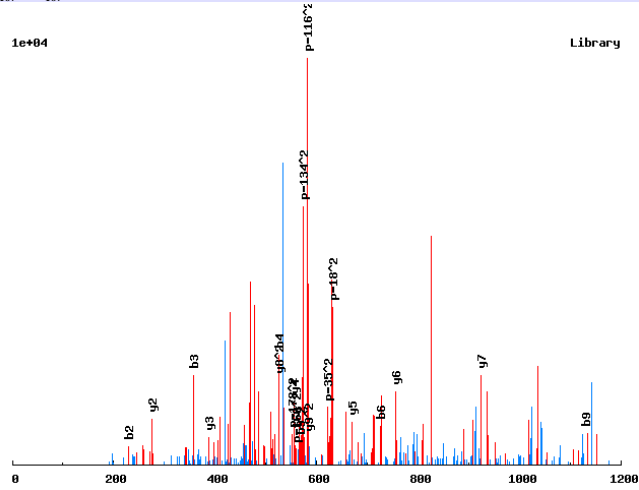

| Library | b <sup>1+</sup>  | b <sup>2+</sup> | #  | AA     | #  | y <sup>1+</sup> | y <sup>2+</sup> |
|---------|------------------|-----------------|----|--------|----|-----------------|-----------------|
|         | 114.0913         | 57.5493         | 1  | L      | 10 |                 |                 |
|         | <b>229.1183</b>  | 115.0628        | 2  | D      | 9  | 1166.4126       | <b>583.7100</b> |
|         | <b>357.1769</b>  | 179.0921        | 3  | Q      | 8  | 1051.3857       | <b>526.1965</b> |
|         | <b>524.1752</b>  | 262.5913        | 4  | S[167] | 7  | <b>923.3271</b> | 462.1672        |
|         | 611.2073         | 306.1073        | 5  | S      | 6  | <b>756.3288</b> | 378.6680        |
|         | <b>725.2502</b>  | 363.1287        | 6  | N      | 5  | <b>669.2967</b> | 335.1520        |
|         | 892.2485         | 446.6279        | 7  | S[167] | 4  | <b>555.2538</b> | 278.1305        |
|         | 1005.3326        | 503.1699        | 8  | L      | 3  | <b>388.2554</b> | 194.6314        |
|         | <b>1133.3912</b> | <b>567.1992</b> | 9  | Q      | 2  | <b>275.1714</b> | 138.0893        |
|         |                  |                 | 10 | K      | 1  | 147.1128        | 74.0600         |

# Annotated spectra from Saleem et. al. 2009

K.LEETKES<sub>167</sub>LQNK.G/2

0.9984

1e+04

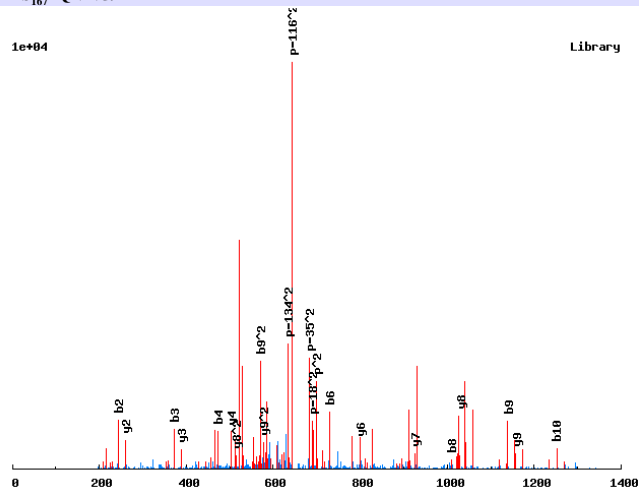

| Library | b <sup>1+</sup> | b <sup>2+</sup> | #  | AA     | #  | y <sup>1+</sup> | y <sup>2+</sup> |
|---------|-----------------|-----------------|----|--------|----|-----------------|-----------------|
|         | 114.0913        | 57.5493         | 1  | L      | 11 |                 |                 |
|         | 243.1339        | 122.0706        | 2  | E      | 10 | 1285.5671       | 643.2872        |
|         | 372.1765        | 186.5919        | 3  | E      | 9  | 1156.5246       | 578.7659        |
|         | 473.2242        | 237.1157        | 4  | T      | 8  | 1027.4820       | 514.2446        |
|         | 601.3192        | 301.1632        | 5  | K      | 7  | 926.4343        | 463.7208        |
|         | 730.3618        | 365.6845        | 6  | E      | 6  | 798.3393        | 399.6733        |
|         | 897.3601        | 449.1837        | 7  | S[167] | 5  | 669.2967        | 335.1520        |
|         | 1010.4442       | 505.7257        | 8  | L      | 4  | 502.2984        | 251.6528        |
|         | 1138.5028       | 569.7550        | 9  | Q      | 3  | 389.2143        | 195.1108        |
|         | 1252.5457       | 626.7765        | 10 | N      | 2  | 261.1557        | 131.0815        |
|         |                 |                 | 11 | K      | 1  | 147.1128        | 74.0600         |



# Annotated spectra from Saleem et. al. 2009

K.LEET<sub>181</sub>K<sub>136</sub>ES<sub>167</sub>LQNK<sub>136</sub>G/2

0.9586

1e+04

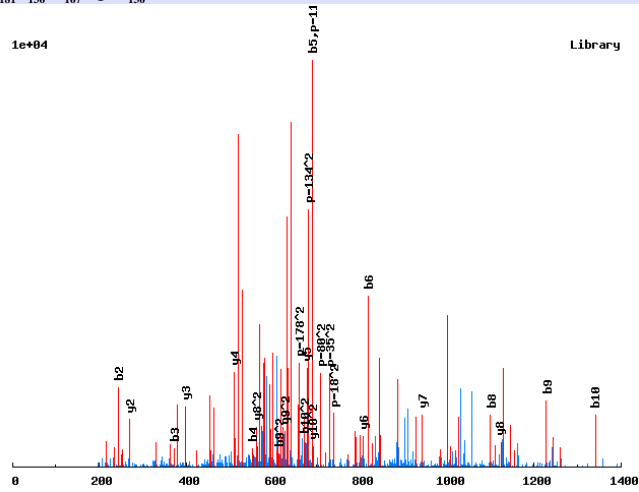

| Library | b <sup>1+</sup> | b <sup>2+</sup> | #  | AA     | #  | y <sup>1+</sup> | y <sup>2+</sup> |
|---------|-----------------|-----------------|----|--------|----|-----------------|-----------------|
|         | 114.0913        | 57.5493         | 1  | L      | 11 |                 |                 |
|         | 243.1339        | 122.0706        | 2  | E      | 10 | 1381.5619       | 691.2846        |
|         | 372.1765        | 186.5919        | 3  | E      | 9  | 1252.5193       | 626.7633        |
|         | 553.1905        | 277.0989        | 4  | T[181] | 8  | 1123.4767       | 562.2420        |
|         | 689.2997        | 345.1535        | 5  | K[136] | 7  | 942.4627        | 471.7350        |
|         | 818.3423        | 409.6748        | 6  | E      | 6  | 806.3535        | 403.6804        |
|         | 985.3406        | 493.1740        | 7  | S[167] | 5  | 677.3109        | 339.1591        |
|         | 1098.4247       | 549.7160        | 8  | L      | 4  | 510.3126        | 255.6599        |
|         | 1226.4833       | 613.7453        | 9  | Q      | 3  | 397.2285        | 199.1179        |
|         | 1340.5262       | 670.7667        | 10 | N      | 2  | 269.1699        | 135.0886        |
|         |                 |                 | 11 | K[136] | 1  | 155.1270        | 78.0671         |

# Annotated spectra from Saleem et. al. 2009

K.LEGADDRLEADD<sub>167</sub>DDLLENIDSGDLALYK.D/3

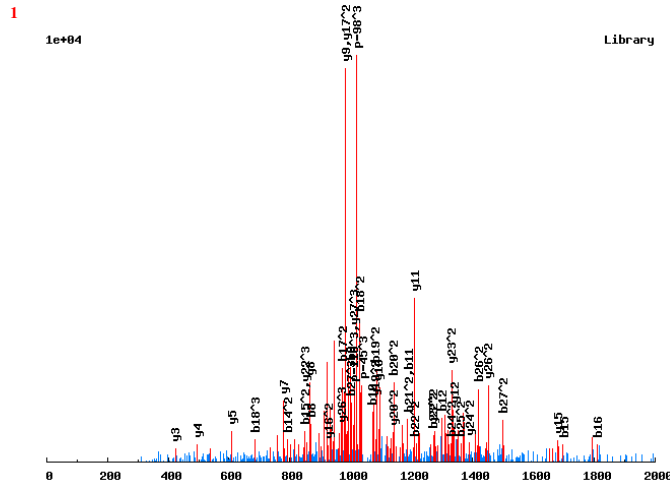

| Library | b <sup>1+</sup> | b <sup>2+</sup> | b <sup>3+</sup> | #  | AA     | #  | y <sup>1+</sup> | y <sup>2+</sup> | y <sup>3+</sup> |
|---------|-----------------|-----------------|-----------------|----|--------|----|-----------------|-----------------|-----------------|
|         | 114.0913        | 57.5493         | 38.7020         | 1  | L      | 28 |                 |                 |                 |
|         | 243.1339        | 122.0706        | 81.7162         | 2  | E      | 27 | 3034.2684       | 1517.6378       | 1012.0943       |
|         | 300.1554        | 150.5813        | 100.7233        | 3  | G      | 26 | 2905.2258       | 1453.1165       | 969.0801        |
|         | 371.1925        | 186.0999        | 124.4024        | 4  | A      | 25 | 2848.2044       | 1424.6058       | 950.0730        |
|         | 486.2194        | 243.6134        | 162.7447        | 5  | D      | 24 | 2777.1672       | 1389.0873       | 926.3939        |
|         | 601.2464        | 301.1268        | 201.0870        | 6  | D      | 23 | 2662.1403       | 1331.5738       | 888.0516        |
|         | 757.3475        | 379.1774        | 253.1207        | 7  | R      | 22 | 2547.1134       | 1274.0603       | 849.7093        |
|         | 870.4315        | 435.7194        | 290.8154        | 8  | L      | 21 | 2391.0123       | 1196.0098       | 797.6756        |
|         | 999.4741        | 500.2407        | 333.8296        | 9  | E      | 20 | 2277.9282       | 1139.4677       | 759.9809        |
|         | 1070.5113       | 535.7593        | 357.5086        | 10 | A      | 19 | 2148.8856       | 1074.9464       | 716.9667        |
|         | 1185.5382       | 593.2727        | 395.8509        | 11 | D      | 18 | 2077.8485       | 1039.4279       | 693.2877        |
|         | 1300.5651       | 650.7862        | 434.1932        | 12 | D      | 17 | 1962.8216       | 981.9144        | 654.9454        |
|         | 1467.5635       | 734.2854        | 489.8594        | 13 | S[167] | 16 | 1847.7946       | 924.4009        | 616.6031        |
|         | 1582.5904       | 791.7989        | 528.2017        | 14 | D      | 15 | 1680.7962       | 840.9018        | 560.9369        |
|         | 1697.6174       | 849.3123        | 566.5440        | 15 | D      | 14 | 1565.7693       | 783.3883        | 522.5946        |
|         | 1810.7014       | 905.8544        | 604.2387        | 16 | L      | 13 | 1450.7424       | 725.8748        | 484.2523        |
|         | 1939.7440       | 970.3757        | 647.2529        | 17 | E      | 12 | 1337.6583       | 669.3328        | 446.5576        |
|         | 2053.7870       | 1027.3971       | 685.2672        | 18 | N      | 11 | 1208.6157       | 604.8115        | 403.5434        |
|         | 2166.8710       | 1083.9391       | 722.9619        | 19 | I      | 10 | 1094.5728       | 547.7900        | 365.5291        |
|         | 2281.8980       | 1141.4526       | 761.3042        | 20 | D      | 9  | 981.4887        | 491.2480        | 327.8344        |
|         | 2368.9300       | 1184.9686       | 790.3148        | 21 | S      | 8  | 866.4618        | 433.7345        | 289.4921        |
|         | 2425.9514       | 1213.4794       | 809.3220        | 22 | G      | 7  | 779.4298        | 390.2185        | 260.4814        |
|         | 2540.9784       | 1270.9928       | 847.6643        | 23 | D      | 6  | 722.4083        | 361.7078        | 241.4743        |
|         | 2654.0624       | 1327.5349       | 885.3590        | 24 | L      | 5  | 607.3814        | 304.1943        | 203.1320        |
|         | 2725.0996       | 1363.0534       | 909.0380        | 25 | A      | 4  | 494.2973        | 247.6523        | 165.4373        |
|         | 2838.1836       | 1419.5954       | 946.7327        | 26 | L      | 3  | 423.2602        | 212.1337        | 141.7582        |
|         | 3001.2469       | 1501.1271       | 1001.0872       | 27 | Y      | 2  | 310.1761        | 155.5917        | 104.0636        |
|         |                 |                 |                 | 28 | K      | 1  | 147.1128        | 74.0600         | 49.7091         |

# Annotated spectra from Saleem et. al. 2009

K.LEKPSDDSIHQNSK<sub>167</sub>DEEQRIPK.Q/4

0.8315

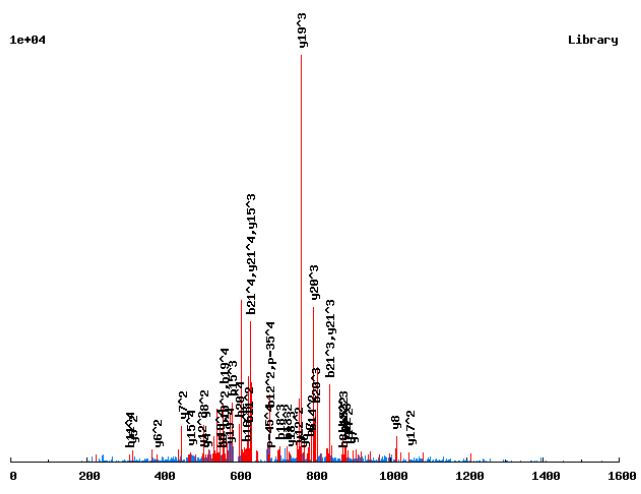

| Library | b <sup>1+</sup> | b <sup>2+</sup> | b <sup>3+</sup> | b <sup>4+</sup> | #  | AA     | #  | y <sup>1+</sup> | y <sup>2+</sup> | y <sup>3+</sup> | y <sup>4+</sup> |
|---------|-----------------|-----------------|-----------------|-----------------|----|--------|----|-----------------|-----------------|-----------------|-----------------|
|         | 114.0913        | 57.5493         | 38.7020         | 29.2783         | 1  | L      | 23 |                 |                 |                 |                 |
|         | 243.1339        | 122.0706        | 81.7162         | 61.5389         | 2  | E      | 22 | 2647.1995       | 1324.1034       | 883.0714        | 662.5553        |
|         | 371.2289        | 186.1181        | 124.4145        | 93.5627         | 3  | K      | 21 | 2518.1569       | 1259.5821       | 840.0572        | 630.2947        |
|         | 468.2816        | 234.6445        | 156.7654        | 117.8259        | 4  | P      | 20 | 2390.0620       | 1195.5346       | 797.3588        | 598.2710        |
|         | 555.3137        | 278.1605        | 185.7761        | 139.5839        | 5  | S      | 19 | 2293.0092       | 1147.0082       | 765.0079        | 574.0078        |
|         | 670.3406        | 335.6739        | 224.1184        | 168.3406        | 6  | D      | 18 | 2205.9772       | 1103.4922       | 735.9972        | 552.2498        |
|         | 785.3676        | 393.1874        | 262.4607        | 197.0974        | 7  | D      | 17 | 2090.9502       | 1045.9788       | 697.6549        | 523.4930        |
|         | 872.3996        | 436.7034        | 291.4714        | 218.8554        | 8  | S      | 16 | 1975.9233       | 988.4653        | 659.3126        | 494.7363        |
|         | 985.4836        | 493.2455        | 329.1661        | 247.1264        | 9  | I      | 15 | 1888.8913       | 944.9493        | 630.3019        | 472.9783        |
|         | 1122.5426       | 561.7749        | 374.8524        | 281.3911        | 10 | H      | 14 | 1775.8072       | 888.4072        | 592.6073        | 444.7073        |
|         | 1250.6011       | 625.8042        | 417.5386        | 313.4057        | 11 | Q      | 13 | 1638.7483       | 819.8778        | 546.9210        | 410.4425        |
|         | 1364.6441       | 682.8257        | 455.5529        | 341.9165        | 12 | N      | 12 | 1510.6897       | 755.8485        | 504.2348        | 378.4279        |
|         | 1451.6761       | 726.3417        | 484.5636        | 363.6745        | 13 | S      | 11 | 1396.6468       | 698.8270        | 466.2204        | 349.9172        |
|         | 1579.7711       | 790.3892        | 527.2619        | 395.6982        | 14 | K      | 10 | 1309.6148       | 655.3110        | 437.2098        | 328.1591        |
|         | 1746.7694       | 873.8884        | 582.9280        | 437.4478        | 15 | S[167] | 9  | 1181.5198       | 591.2635        | 394.5115        | 296.1354        |
|         | 1861.7964       | 931.4018        | 621.2703        | 466.2046        | 16 | D      | 8  | 1014.5214       | 507.7644        | 338.8453        | 254.3858        |
|         | 1990.8390       | 995.9231        | 664.2845        | 498.4652        | 17 | E      | 7  | 899.4945        | 450.2509        | 300.5030        | 225.6291        |
|         | 2119.8815       | 1060.4444       | 707.2987        | 530.7258        | 18 | E      | 6  | 770.4519        | 385.7296        | 257.4888        | 193.3684        |
|         | 2247.9401       | 1124.4737       | 749.9849        | 562.7405        | 19 | Q      | 5  | 641.4093        | 321.2083        | 214.4746        | 161.1078        |
|         | 2404.0412       | 1202.5243       | 802.0186        | 601.7658        | 20 | R      | 4  | 513.3507        | 257.1790        | 171.7884        | 129.0931        |
|         | 2517.1253       | 1259.0663       | 839.7133        | 630.0368        | 21 | I      | 3  | 357.2496        | 179.1284        | 119.7547        | 90.0679         |
|         | 2614.1781       | 1307.5927       | 872.0642        | 654.3000        | 22 | P      | 2  | 244.1656        | 122.5864        | 82.0600         | 61.7969         |
|         |                 |                 |                 |                 | 23 | K      | 1  | 147.1128        | 74.0600         | 49.7091         | 37.5337         |

# Annotated spectra from Saleem et. al. 2009

K.LENMINNSS<sub>167</sub>HNLLSHPS<sub>167</sub>VPK.F/3

0.9652

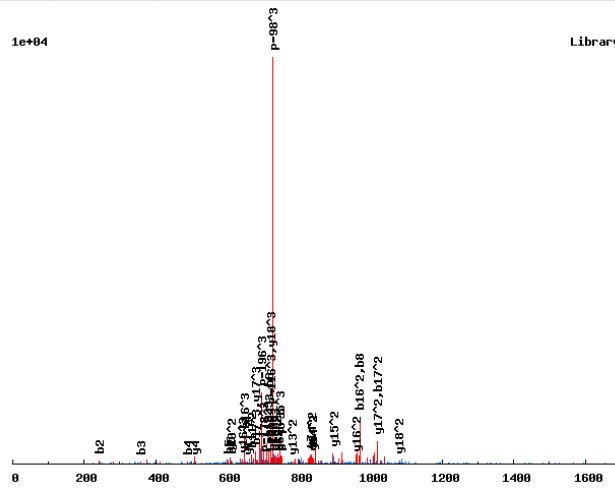

| Library | b <sup>1+</sup> | b <sup>2+</sup> | b <sup>3+</sup> | #  | AA     | #  | y <sup>1+</sup> | y <sup>2+</sup> | y <sup>3+</sup> |
|---------|-----------------|-----------------|-----------------|----|--------|----|-----------------|-----------------|-----------------|
|         | 114.0913        | 57.5493         | 38.7020         | 1  | L      | 19 |                 |                 |                 |
|         | 243.1339        | 122.0706        | 81.7162         | 2  | E      | 18 | 2164.8883       | 1082.9478       | 722.3009        |
|         | 357.1769        | 179.0921        | 119.7305        | 3  | N      | 17 | 2035.8457       | 1018.4265       | 679.2867        |
|         | 488.2173        | 244.6123        | 163.4106        | 4  | M      | 16 | 1921.8027       | 961.4050        | 641.2724        |
|         | 602.2603        | 301.6338        | 201.4249        | 5  | N      | 15 | 1790.7622       | 895.8848        | 597.5923        |
|         | 716.3032        | 358.6552        | 239.4393        | 6  | N      | 14 | 1676.7193       | 838.8633        | 559.5780        |
|         | 803.3352        | 402.1713        | 268.4499        | 7  | S      | 13 | 1562.6764       | 781.8418        | 521.5636        |
|         | 970.3336        | 485.6704        | 324.1161        | 8  | S[167] | 12 | 1475.6444       | 738.3258        | 492.5530        |
|         | 1107.3925       | 554.1999        | 369.8024        | 9  | H      | 11 | 1308.6460       | 654.8266        | 436.8869        |
|         | 1221.4354       | 611.2214        | 407.8167        | 10 | N      | 10 | 1171.5871       | 586.2972        | 391.2005        |
|         | 1334.5195       | 667.7634        | 445.5114        | 11 | L      | 9  | 1057.5442       | 529.2757        | 353.1862        |
|         | 1447.6036       | 724.3054        | 483.2060        | 12 | L      | 8  | 944.4601        | 472.7337        | 315.4916        |
|         | 1534.6356       | 767.8214        | 512.2167        | 13 | S      | 7  | 831.3760        | 416.1917        | 277.7969        |
|         | 1671.6945       | 836.3509        | 557.9030        | 14 | H      | 6  | 744.3440        | 372.6756        | 248.7862        |
|         | 1768.7473       | 884.8773        | 590.2539        | 15 | P      | 5  | 607.2851        | 304.1462        | 203.0999        |
|         | 1935.7456       | 968.3765        | 645.9201        | 16 | S[167] | 4  | 510.2323        | 255.6198        | 170.7490        |
|         | 2034.8140       | 1017.9107       | 678.9429        | 17 | V      | 3  | 343.2340        | 172.1206        | 115.0828        |
|         | 2131.8668       | 1066.4370       | 711.2938        | 18 | P      | 2  | 244.1656        | 122.5864        | 82.0600         |
|         |                 |                 |                 | 19 | K      | 1  | 147.1128        | 74.0600         | 49.7091         |

# Annotated spectra from Saleem et. al. 2009

K.LGDDYS<sub>167</sub>DK<sub>136</sub>ETAK<sub>136</sub>E/2

0.9972

1e+04

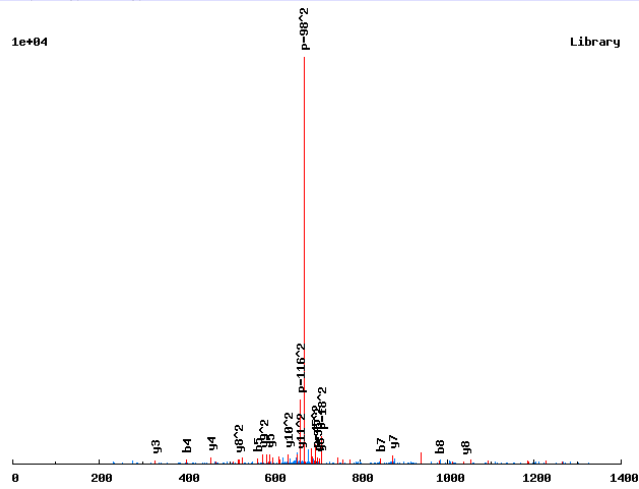

| Library | b <sup>1+</sup> | b <sup>2+</sup> | #  | AA     | #  | y <sup>1+</sup> | y <sup>2+</sup> |
|---------|-----------------|-----------------|----|--------|----|-----------------|-----------------|
|         | 114.0913        | 57.5493         | 1  | L      | 12 |                 |                 |
|         | 171.1128        | 86.0600         | 2  | G      | 11 | 1324.5275       | 662.7674        |
|         | 286.1397        | 143.5735        | 3  | D      | 10 | 1267.5060       | 634.2567        |
|         | 401.1667        | 201.0870        | 4  | D      | 9  | 1152.4791       | 576.7432        |
|         | 564.2300        | 282.6186        | 5  | Y      | 8  | 1037.4522       | 519.2297        |
|         | 731.2284        | 366.1178        | 6  | S[167] | 7  | 874.3888        | 437.6981        |
|         | 846.2553        | 423.6313        | 7  | D      | 6  | 707.3905        | 354.1989        |
|         | 982.3645        | 491.6859        | 8  | K[136] | 5  | 592.3635        | 296.6854        |
|         | 1111.4071       | 556.2072        | 9  | E      | 4  | 456.2544        | 228.6308        |
|         | 1212.4547       | 606.7310        | 10 | T      | 3  | 327.2118        | 164.1095        |
|         | 1283.4918       | 642.2496        | 11 | A      | 2  | 226.1641        | 113.5857        |
|         |                 |                 | 12 | K[136] | 1  | 155.1270        | 78.0671         |

# Annotated spectra from Saleem et. al. 2009

K.LGET<sub>181</sub>LGLGSTGK<sub>136</sub>-V/2

0.8962

1e+04

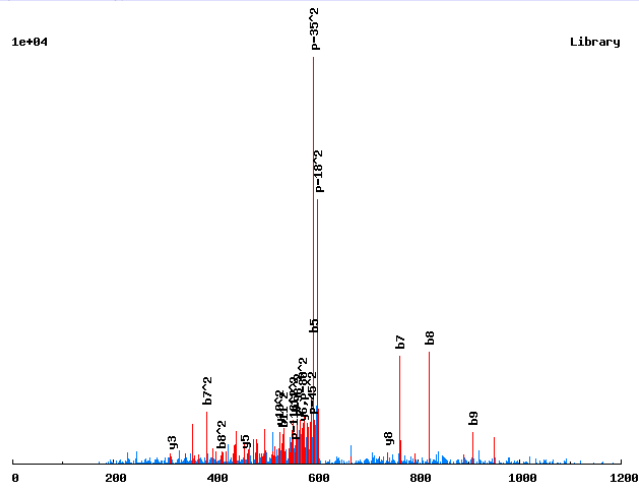

| Library | b <sup>1+</sup> | b <sup>2+</sup> | #  | AA     | #  | y <sup>1+</sup> | y <sup>2+</sup> |
|---------|-----------------|-----------------|----|--------|----|-----------------|-----------------|
|         | 114.0913        | 57.5493         | 1  | L      | 12 |                 |                 |
|         | 171.1128        | 86.0600         | 2  | G      | 11 | 1107.5173       | 554.2623        |
|         | 300.1554        | 150.5813        | 3  | E      | 10 | 1050.4958       | 525.7515        |
|         | 481.1694        | 241.0883        | 4  | T[181] | 9  | 921.4532        | 461.2303        |
|         | 594.2535        | 297.6304        | 5  | L      | 8  | 740.4392        | 370.7232        |
|         | 651.2749        | 326.1411        | 6  | G      | 7  | 627.3551        | 314.1812        |
|         | 764.3590        | 382.6831        | 7  | L      | 6  | 570.3337        | 285.6705        |
|         | 821.3804        | 411.1939        | 8  | G      | 5  | 457.2496        | 229.1285        |
|         | 908.4125        | 454.7099        | 9  | S      | 4  | 400.2282        | 200.6177        |
|         | 1009.4602       | 505.2337        | 10 | T      | 3  | 313.1961        | 157.1017        |
|         | 1066.4816       | 533.7444        | 11 | G      | 2  | 212.1485        | 106.5779        |
|         |                 |                 | 12 | K[136] | 1  | 155.1270        | 78.0671         |

# Annotated spectra from Saleem et. al. 2009

R.LGLGGSGDS<sub>167</sub>NAPM<sub>147</sub>TGVR.R/3

0.6594

1e+04

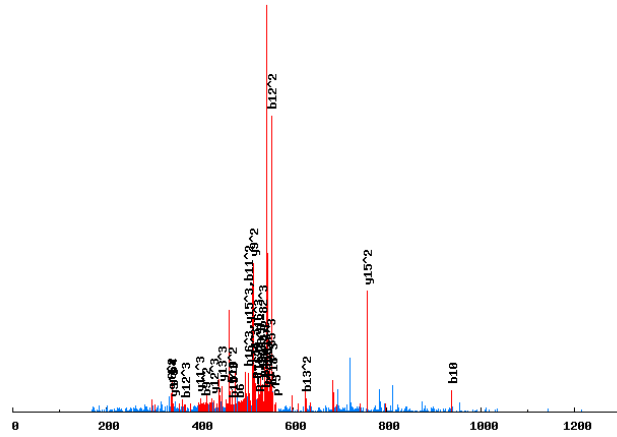

| Library | b <sup>1+</sup> | b <sup>2+</sup> | b <sup>3+</sup> | #  | AA     | #  | y <sup>1+</sup> | y <sup>2+</sup> | y <sup>3+</sup> |
|---------|-----------------|-----------------|-----------------|----|--------|----|-----------------|-----------------|-----------------|
|         | 114.0913        | 57.5493         | 38.7020         | 1  | L      | 17 |                 |                 |                 |
|         | 171.1128        | 86.0600         | 57.7091         | 2  | G      | 16 | 1571.6519       | 786.3296        | 524.5555        |
|         | 284.1969        | 142.6021        | 95.4038         | 3  | L      | 15 | 1514.6305       | 757.8189        | 505.5483        |
|         | 341.2183        | 171.1128        | 114.4110        | 4  | G      | 14 | 1401.5464       | 701.2768        | 467.8537        |
|         | 398.2398        | 199.6235        | 133.4181        | 5  | G      | 13 | 1344.5250       | 672.7661        | 448.8465        |
|         | 485.2718        | 243.1395        | 162.4288        | 6  | S      | 12 | 1287.5035       | 644.2554        | 429.8394        |
|         | 542.2933        | 271.6503        | 181.4359        | 7  | G      | 11 | 1200.4715       | 600.7394        | 400.8287        |
|         | 657.3202        | 329.1637        | 219.7783        | 8  | D      | 10 | 1143.4500       | 572.2286        | 381.8215        |
|         | 824.3186        | 412.6629        | 275.4444        | 9  | S[167] | 9  | 1028.4231       | 514.7152        | 343.4792        |
|         | 938.3615        | 469.6844        | 313.4587        | 10 | N      | 8  | 861.4247        | 431.2160        | 287.8131        |
|         | 1009.3986       | 505.2029        | 337.1377        | 11 | A      | 7  | 747.3818        | 374.1945        | 249.7988        |
|         | 1106.4514       | 553.7293        | 369.4886        | 12 | P      | 6  | 676.3447        | 338.6760        | 226.1197        |
|         | 1253.4868       | 627.2470        | 418.5004        | 13 | M[147] | 5  | 579.2919        | 290.1496        | 193.7688        |
|         | 1354.5345       | 677.7709        | 452.1830        | 14 | T      | 4  | 432.2565        | 216.6319        | 144.7570        |
|         | 1411.5559       | 706.2816        | 471.1902        | 15 | G      | 3  | 331.2088        | 166.1080        | 111.0745        |
|         | 1510.6243       | 755.8158        | 504.2130        | 16 | V      | 2  | 274.1874        | 137.5973        | 92.0673         |
|         |                 |                 |                 | 17 | R      | 1  | 175.1190        | 88.0631         | 59.0445         |

# Annotated spectra from Saleem et. al. 2009

K.LGPQS<sub>167</sub>MSR.Q/2

0.691

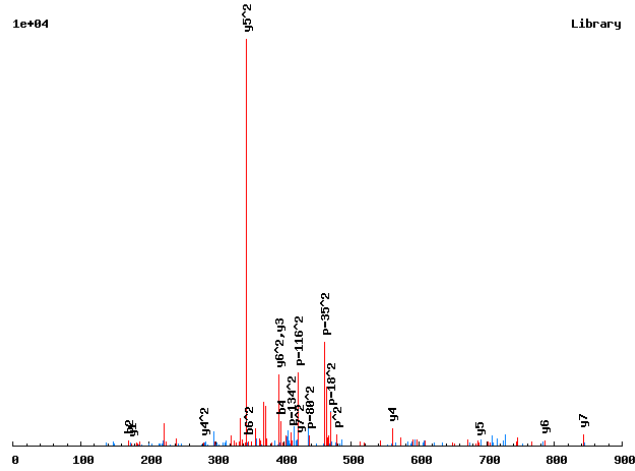

| Library | b <sup>1+</sup> | b <sup>2+</sup> | # | AA      | # | y <sup>1+</sup> | y <sup>2+</sup> |
|---------|-----------------|-----------------|---|---------|---|-----------------|-----------------|
|         | 114.0913        | 57.5493         | 1 | L       | 8 |                 |                 |
|         | 171.1128        | 86.0600         | 2 | G       | 7 | 842.3226        | 421.6650        |
|         | 268.1656        | 134.5864        | 3 | P       | 6 | 785.3012        | 393.1542        |
|         | 396.2241        | 198.6157        | 4 | Q       | 5 | 688.2484        | 344.6278        |
|         | 563.2225        | 282.1149        | 5 | S [167] | 4 | 560.1898        | 280.5986        |
|         | 694.2630        | 347.6351        | 6 | M       | 3 | 393.1915        | 197.0994        |
|         | 781.2950        | 391.1512        | 7 | S       | 2 | 262.1510        | 131.5791        |
|         |                 |                 | 8 | R       | 1 | 175.1190        | 88.0631         |



# Annotated spectra from Saleem et. al. 2009

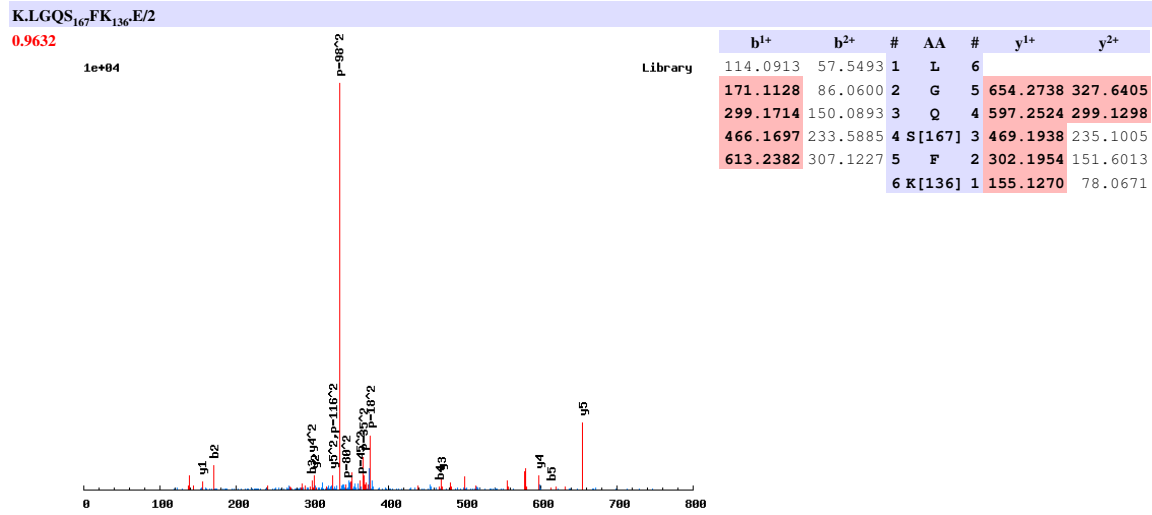

# Annotated spectra from Saleem et. al. 2009

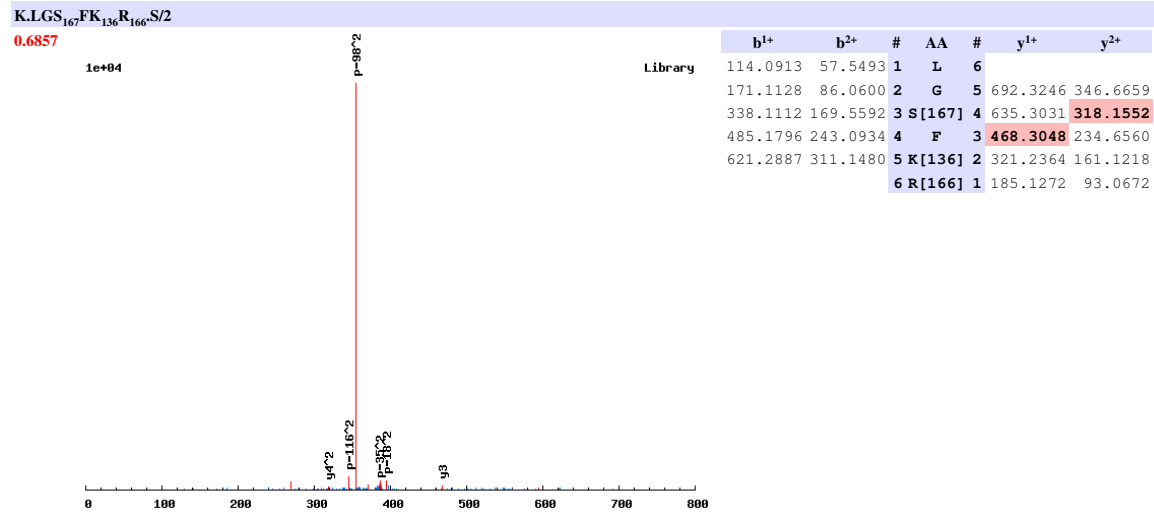

# Annotated spectra from Saleem et. al. 2009

RLGS<sub>167</sub>LVGQDSGYVGGGLPK<sub>136</sub>N/2

0.9829

1e+04

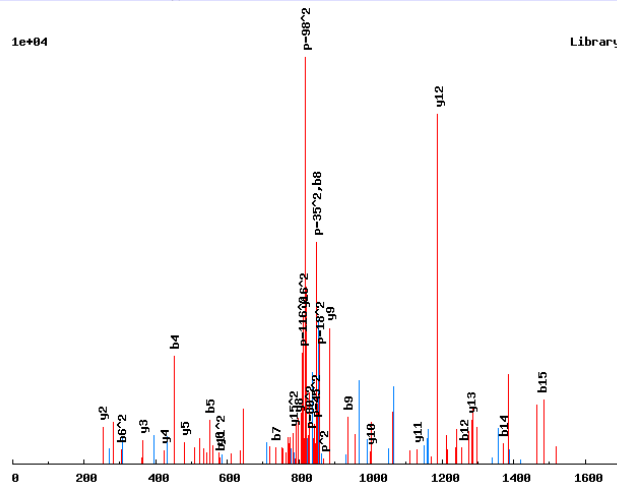

| Library | b <sup>1+</sup> | b <sup>2+</sup> | #  | AA     | #  | y <sup>1+</sup> | y <sup>2+</sup> |
|---------|-----------------|-----------------|----|--------|----|-----------------|-----------------|
|         | 114.0913        | 57.5493         | 1  | L      | 17 |                 |                 |
|         | 171.1128        | 86.0600         | 2  | G      | 16 | 1621.7712       | 811.3893        |
|         | 338.1112        | 169.5592        | 3  | S[167] | 15 | 1564.7498       | 782.8785        |
|         | 451.1952        | 226.1013        | 4  | L      | 14 | 1397.7514       | 699.3793        |
|         | 550.2636        | 275.6355        | 5  | V      | 13 | 1284.6674       | 642.8373        |
|         | 607.2851        | 304.1462        | 6  | G      | 12 | 1185.5989       | 593.3031        |
|         | 735.3437        | 368.1755        | 7  | Q      | 11 | 1128.5775       | 564.7924        |
|         | 850.3706        | 425.6889        | 8  | D      | 10 | 1000.5189       | 500.7631        |
|         | 937.4026        | 469.2050        | 9  | S      | 9  | 885.4920        | 443.2496        |
|         | 994.4241        | 497.7157        | 10 | G      | 8  | 798.4599        | 399.7336        |
|         | 1157.4874       | 579.2474        | 11 | Y      | 7  | 741.4385        | 371.2229        |
|         | 1256.5558       | 628.7816        | 12 | V      | 6  | 578.3751        | 289.6912        |
|         | 1313.5773       | 657.2923        | 13 | G      | 5  | 479.3067        | 240.1570        |
|         | 1370.5988       | 685.8030        | 14 | G      | 4  | 422.2853        | 211.6463        |
|         | 1483.6828       | 742.3451        | 15 | L      | 3  | 365.2638        | 183.1355        |
|         | 1580.7356       | 790.8714        | 16 | P      | 2  | 252.1798        | 126.5935        |
|         |                 |                 | 17 | K[136] | 1  | 155.1270        | 78.0671         |

# Annotated spectra from Saleem et. al. 2009

R.LGS<sub>167</sub>PIGESSPAEVPK<sub>136</sub>-N/2

0.998

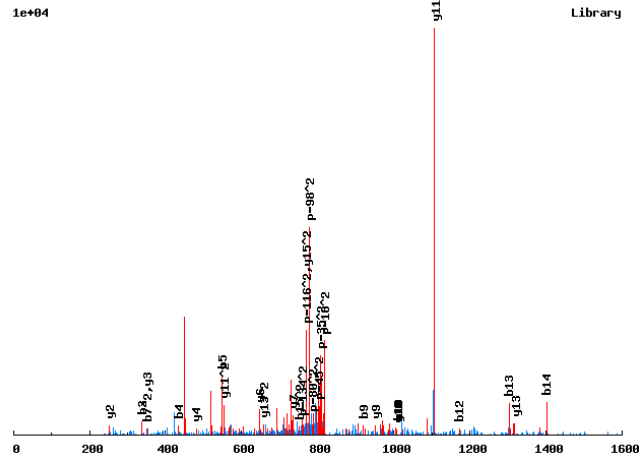

| Library | b <sup>1+</sup> | b <sup>2+</sup> | #  | AA     | #  | y <sup>1+</sup> | y <sup>2+</sup> |
|---------|-----------------|-----------------|----|--------|----|-----------------|-----------------|
|         | 114.0913        | 57.5493         | 1  | L      | 16 |                 |                 |
|         | 171.1128        | 86.0600         | 2  | G      | 15 | 1539.7181       | 770.3627        |
|         | 338.1112        | 169.5592        | 3  | S[167] | 14 | 1482.6967       | 741.8520        |
|         | 435.1639        | 218.0856        | 4  | P      | 13 | 1315.6983       | 658.3528        |
|         | 548.2480        | 274.6276        | 5  | I      | 12 | 1218.6456       | 609.8264        |
|         | 645.3007        | 323.1540        | 6  | P      | 11 | 1105.5615       | 553.2844        |
|         | 702.3222        | 351.6647        | 7  | G      | 10 | 1008.5087       | 504.7580        |
|         | 831.3648        | 416.1860        | 8  | E      | 9  | 951.4873        | 476.2473        |
|         | 918.3968        | 459.7021        | 9  | S      | 8  | 822.4447        | 411.7260        |
|         | 1005.4289       | 503.2181        | 10 | S      | 7  | 735.4127        | 368.2100        |
|         | 1102.4816       | 551.7444        | 11 | P      | 6  | 648.3806        | 324.6940        |
|         | 1173.5187       | 587.2630        | 12 | A      | 5  | 551.3279        | 276.1676        |
|         | 1302.5613       | 651.7843        | 13 | E      | 4  | 480.2908        | 240.6490        |
|         | 1401.6297       | 701.3185        | 14 | V      | 3  | 351.2482        | 176.1277        |
|         | 1498.6825       | 749.8449        | 15 | P      | 2  | 252.1798        | 126.5935        |
|         |                 |                 | 16 | K[136] | 1  | 155.1270        | 78.0671         |

# Annotated spectra from Saleem et. al. 2009

RLGS<sub>167</sub>-PIPGESS<sub>167</sub>-PAEVPKNET<sub>181</sub>-PAAQEQMPDNEPK.Q/3

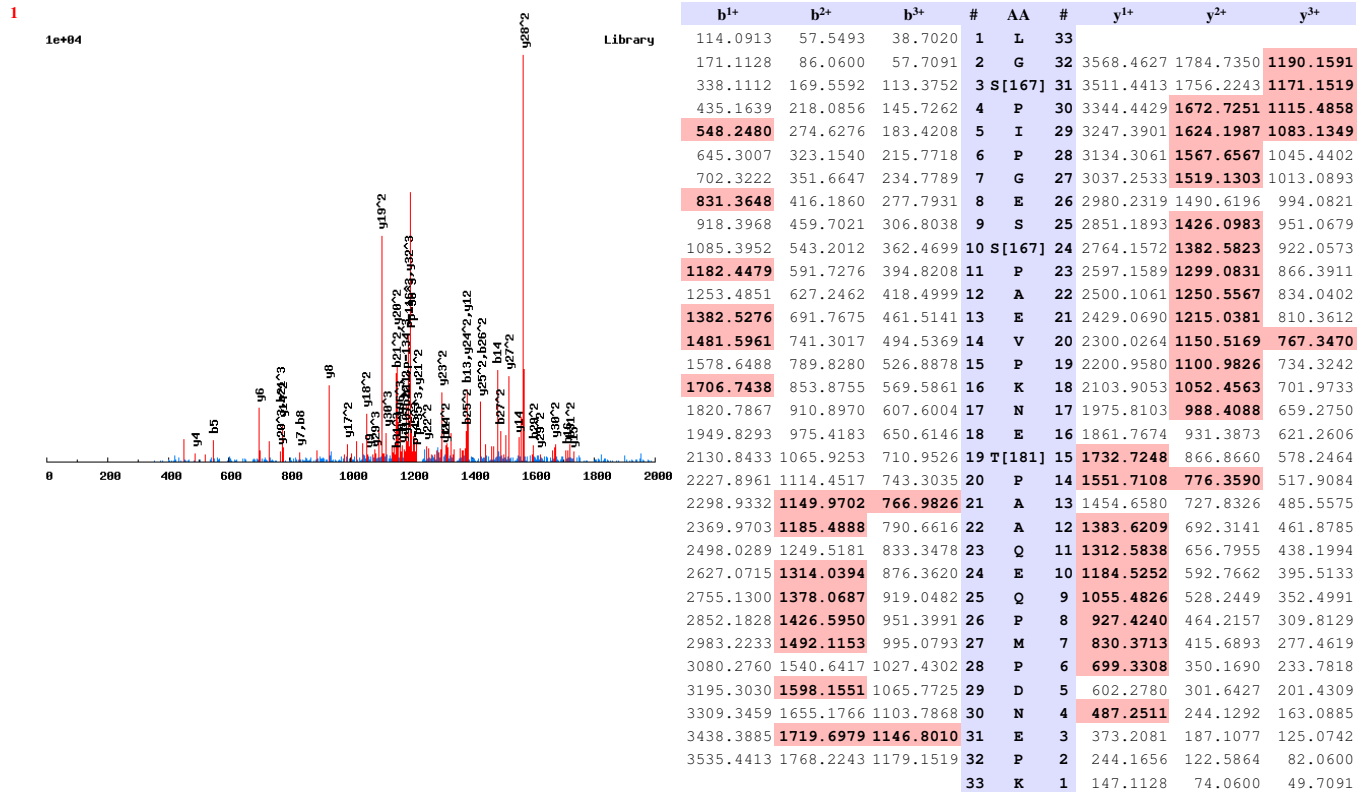

# Annotated spectra from Saleem et. al. 2009

RLGS<sub>167</sub>-PIPGESS<sub>167</sub>-PAEVPK<sub>136</sub>-NETPAAQEQPM<sub>147</sub>-PDNEPK<sub>136</sub>-Q/3

0.9907

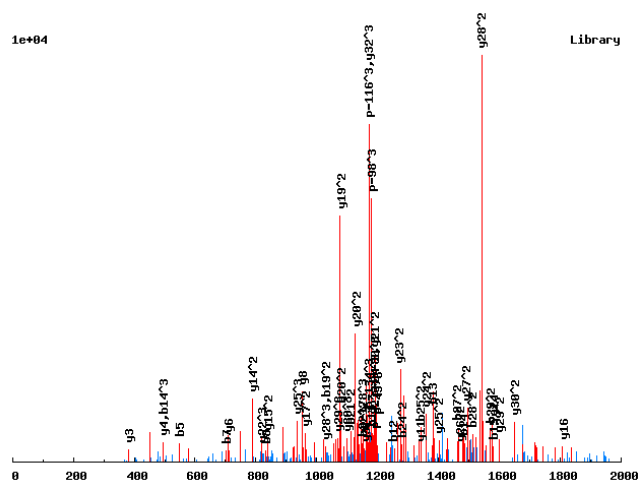

| Library | b <sup>1+</sup>  | b <sup>2+</sup>  | b <sup>3+</sup> | #  | AA     | #  | y <sup>1+</sup>  | y <sup>2+</sup>  | y <sup>3+</sup>  |
|---------|------------------|------------------|-----------------|----|--------|----|------------------|------------------|------------------|
|         | 114.0913         | 57.5493          | 38.7020         | 1  | L      | 33 |                  |                  |                  |
|         | 171.1128         | 86.0600          | 57.7091         | 2  | G      | 32 | 3520.5197        | 1760.7635        | <b>1174.1781</b> |
|         | 338.1112         | 169.5592         | 113.3752        | 3  | S[167] | 31 | 3463.4982        | 1732.2528        | <b>1155.1709</b> |
|         | 435.1639         | 218.0856         | 145.7262        | 4  | P      | 30 | 3296.4999        | <b>1648.7536</b> | <b>1099.5048</b> |
|         | <b>548.2480</b>  | 274.6276         | 183.4208        | 5  | I      | 29 | 3199.4471        | <b>1600.2272</b> | <b>1067.1539</b> |
|         | 645.3007         | 323.1540         | 215.7718        | 6  | P      | 28 | 3086.3631        | <b>1543.6852</b> | <b>1029.4592</b> |
|         | <b>702.3222</b>  | 351.6647         | 234.7789        | 7  | G      | 27 | 2989.3103        | <b>1495.1588</b> | 997.1083         |
|         | <b>831.3648</b>  | 416.1860         | 277.7931        | 8  | E      | 26 | 2932.2888        | <b>1466.6481</b> | 978.1011         |
|         | 918.3968         | 459.7021         | 306.8038        | 9  | S      | 25 | 2803.2462        | <b>1402.1268</b> | <b>935.0869</b>  |
|         | 1085.3952        | 543.2012         | 362.4699        | 10 | S[167] | 24 | 2716.2142        | <b>1358.6107</b> | 906.0763         |
|         | <b>1182.4479</b> | 591.7276         | 394.8208        | 11 | P      | 23 | 2549.2159        | <b>1275.1116</b> | 850.4101         |
|         | <b>1253.4851</b> | 627.2462         | 418.4999        | 12 | A      | 22 | 2452.1631        | 1226.5852        | <b>818.0592</b>  |
|         | <b>1382.5276</b> | 691.7675         | 461.5141        | 13 | E      | 21 | 2381.1260        | <b>1191.0666</b> | 794.3802         |
|         | <b>1481.5961</b> | 741.3017         | <b>494.5369</b> | 14 | V      | 20 | 2252.0834        | <b>1126.5453</b> | 751.3660         |
|         | <b>1578.6488</b> | 789.8280         | 526.8878        | 15 | P      | 19 | 2153.0150        | <b>1077.0111</b> | 718.3432         |
|         | 1714.7580        | 857.8826         | 572.2575        | 16 | K[136] | 18 | 2055.9622        | 1028.4848        | 685.9923         |
|         | 1828.8009        | 914.9041         | 610.2718        | 17 | N      | 17 | 1919.8531        | <b>960.4302</b>  | 640.6225         |
|         | 1957.8435        | 979.4254         | 653.2860        | 18 | E      | 16 | <b>1805.8101</b> | 903.4087         | 602.6082         |
|         | 2058.8912        | <b>1029.9492</b> | 686.9686        | 19 | T      | 15 | 1676.7675        | <b>838.8874</b>  | 559.5940         |
|         | 2155.9439        | <b>1078.4756</b> | 719.3195        | 20 | P      | 14 | <b>1575.7199</b> | <b>788.3636</b>  | 525.9115         |
|         | 2226.9810        | <b>1113.9942</b> | 742.9985        | 21 | A      | 13 | 1478.6671        | 739.8372         | 493.5606         |
|         | 2298.0182        | <b>1149.5127</b> | 766.6776        | 22 | A      | 12 | 1407.6300        | 704.3186         | 469.8815         |
|         | 2426.0767        | 1213.5420        | 809.3638        | 23 | Q      | 11 | <b>1336.5929</b> | 668.8001         | 446.2025         |
|         | 2555.1193        | <b>1278.0633</b> | 852.3780        | 24 | E      | 10 | 1208.5343        | 604.7708         | 403.5163         |
|         | 2683.1779        | <b>1342.0926</b> | 895.0642        | 25 | Q      | 9  | 1079.4917        | 540.2495         | 360.5021         |
|         | 2780.2307        | 1390.6190        | 927.4151        | 26 | P      | 8  | <b>951.4331</b>  | 476.2202         | 317.8159         |
|         | 2927.2661        | <b>1464.1367</b> | 976.4269        | 27 | M[147] | 7  | 854.3804         | 427.6938         | 285.4650         |
|         | 3024.3188        | <b>1512.6631</b> | 1008.7778       | 28 | P      | 6  | <b>707.3450</b>  | 354.1761         | 236.4532         |
|         | 3139.3458        | <b>1570.1765</b> | 1047.1201       | 29 | D      | 5  | 610.2922         | 305.6497         | 204.1023         |
|         | 3253.3887        | 1627.1980        | 1085.1344       | 30 | N      | 4  | <b>495.2653</b>  | 248.1363         | 165.7599         |
|         | 3382.4313        | 1691.7193        | 1128.1486       | 31 | E      | 3  | <b>381.2223</b>  | 191.1148         | 127.7456         |
|         | 3479.4840        | 1740.2457        | 1160.4995       | 32 | P      | 2  | 252.1798         | 126.5935         | 84.7314          |
|         |                  |                  |                 | 33 | K[136] | 1  | 155.1270         | 78.0671          | 52.3805          |

# Annotated spectra from Saleem et. al. 2009

K.LGTVPSNYVS<sub>167</sub>S<sub>167</sub>PDLVR.R/2

0.9999

1e+04

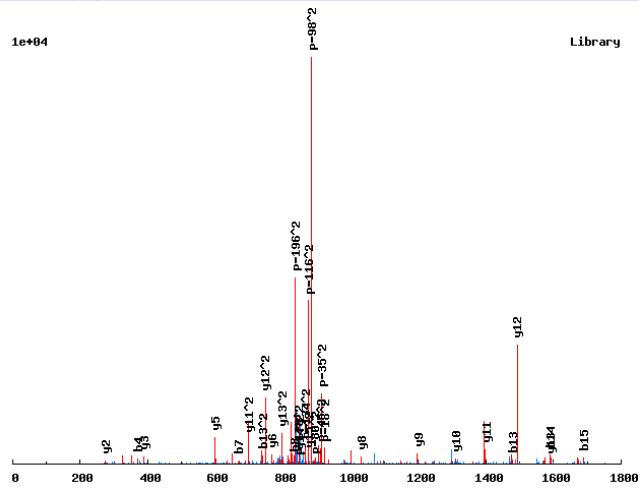

| Library | b <sup>1+</sup> | b <sup>2+</sup> | #  | AA     | #  | y <sup>1+</sup> | y <sup>2+</sup> |
|---------|-----------------|-----------------|----|--------|----|-----------------|-----------------|
|         | 114.0913        | 57.5493         | 1  | L      | 16 |                 |                 |
|         | 171.1128        | 86.0600         | 2  | G      | 15 | 1750.7449       | 875.8761        |
|         | 272.1605        | 136.5839        | 3  | T      | 14 | 1693.7234       | 847.3653        |
|         | 371.2289        | 186.1181        | 4  | V      | 13 | 1592.6757       | 796.8415        |
|         | 468.2816        | 234.6445        | 5  | P      | 12 | 1493.6073       | 747.3073        |
|         | 555.3137        | 278.1605        | 6  | S      | 11 | 1396.5545       | 698.7809        |
|         | 669.3566        | 335.1819        | 7  | N      | 10 | 1309.5225       | 655.2649        |
|         | 832.4199        | 416.7136        | 8  | Y      | 9  | 1195.4796       | 598.2434        |
|         | 931.4883        | 466.2478        | 9  | V      | 8  | 1032.4163       | 516.7118        |
|         | 1098.4867       | 549.7470        | 10 | S[167] | 7  | 933.3478        | 467.1776        |
|         | 1265.4851       | 633.2462        | 11 | S[167] | 6  | 766.3495        | 383.6784        |
|         | 1362.5378       | 681.7726        | 12 | P      | 5  | 599.3511        | 300.1792        |
|         | 1477.5648       | 739.2860        | 13 | D      | 4  | 502.2984        | 251.6528        |
|         | 1590.6488       | 795.8281        | 14 | L      | 3  | 387.2714        | 194.1393        |
|         | 1689.7172       | 845.3623        | 15 | V      | 2  | 274.1874        | 137.5973        |
|         |                 |                 | 16 | R      | 1  | 175.1190        | 88.0631         |

# Annotated spectra from Saleem et. al. 2009

R.LHHNSVSDPKSEDS<sub>167</sub>S.-/3

0.9998

1e+04

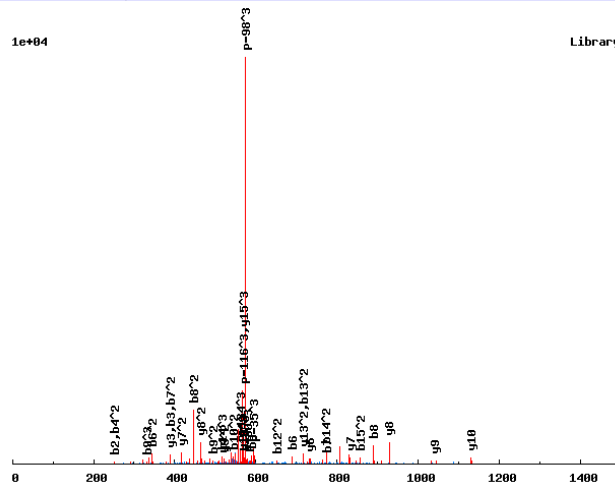

| Library | b <sup>1+</sup> | b <sup>2+</sup> | b <sup>3+</sup> | #  | AA     | #  | y <sup>1+</sup>  | y <sup>2+</sup> | y <sup>3+</sup> |
|---------|-----------------|-----------------|-----------------|----|--------|----|------------------|-----------------|-----------------|
|         | 114.0913        | 57.5493         | 38.7020         | 1  | L      | 16 |                  |                 |                 |
|         | <b>251.1502</b> | 126.0788        | 84.3883         | 2  | H      | 15 | 1704.6861        | 852.8467        | <b>568.9002</b> |
|         | <b>388.2092</b> | 194.6082        | 130.0746        | 3  | H      | 14 | 1567.6272        | 784.3172        | 523.2139        |
|         | 502.2521        | <b>251.6297</b> | 168.0889        | 4  | N      | 13 | 1430.5683        | <b>715.7878</b> | 477.5276        |
|         | <b>589.2841</b> | 295.1457        | 197.0996        | 5  | S      | 12 | 1316.5253        | 658.7663        | 439.5133        |
|         | <b>688.3525</b> | <b>344.6799</b> | 230.1224        | 6  | V      | 11 | 1229.4933        | 615.2503        | 410.5026        |
|         | <b>775.3846</b> | <b>388.1959</b> | 259.1330        | 7  | S      | 10 | <b>1130.4249</b> | <b>565.7161</b> | 377.4798        |
|         | <b>890.4115</b> | <b>445.7094</b> | 297.4754        | 8  | D      | 9  | <b>1043.3929</b> | <b>522.2001</b> | 348.4691        |
|         | 987.4643        | <b>494.2358</b> | <b>329.8263</b> | 9  | P      | 8  | <b>928.3659</b>  | <b>464.6866</b> | 310.1268        |
|         | 1086.5327       | <b>543.7700</b> | 362.8491        | 10 | V      | 7  | <b>831.3132</b>  | <b>416.1602</b> | 277.7759        |
|         | 1214.6276       | 607.8175        | 405.5474        | 11 | K      | 6  | <b>732.2448</b>  | 366.6260        | 244.7531        |
|         | 1301.6597       | <b>651.3335</b> | 434.5581        | 12 | S      | 5  | 604.1498         | 302.5785        | 202.0548        |
|         | 1430.7023       | <b>715.8548</b> | 477.5723        | 13 | E      | 4  | <b>517.1178</b>  | 259.0625        | 173.0441        |
|         | 1545.7292       | <b>773.3682</b> | <b>515.9146</b> | 14 | D      | 3  | <b>388.0752</b>  | 194.5412        | 130.0299        |
|         | 1712.7276       | <b>856.8674</b> | <b>571.5807</b> | 15 | S[167] | 2  | 273.0482         | 137.0278        | 91.6876         |
|         |                 |                 |                 | 16 | S      | 1  | 106.0499         | 53.5286         | 36.0215         |



# Annotated spectra from Saleem et. al. 2009

R.LHHNS<sub>167</sub>VSDPVKSEDS<sub>167</sub>S<sub>-</sub>/3

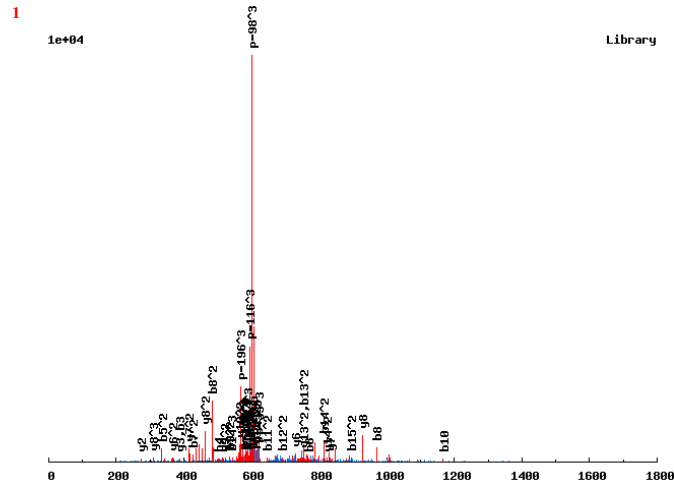

| Library | b <sup>1+</sup>  | b <sup>2+</sup> | b <sup>3+</sup> | #  | AA     | #  | y <sup>1+</sup> | y <sup>2+</sup> | y <sup>3+</sup> |
|---------|------------------|-----------------|-----------------|----|--------|----|-----------------|-----------------|-----------------|
|         | 114.0913         | 57.5493         | 38.7020         | 1  | L      | 16 |                 |                 |                 |
|         | 251.1502         | 126.0788        | 84.3883         | 2  | H      | 15 | 1784.6524       | 892.8298        | <b>595.5557</b> |
|         | <b>388.2092</b>  | 194.6082        | 130.0746        | 3  | H      | 14 | 1647.5935       | <b>824.3004</b> | 549.8694        |
|         | <b>502.2521</b>  | 251.6297        | 168.0889        | 4  | N      | 13 | 1510.5346       | <b>755.7709</b> | 504.1831        |
|         | 669.2505         | <b>335.1289</b> | 223.7550        | 5  | S[167] | 12 | 1396.4917       | 698.7495        | 466.1687        |
|         | <b>768.3189</b>  | 384.6631        | 256.7778        | 6  | V      | 11 | 1229.4933       | <b>615.2503</b> | 410.5026        |
|         | 855.3509         | <b>428.1791</b> | 285.7885        | 7  | S      | 10 | 1130.4249       | <b>565.7161</b> | 377.4798        |
|         | <b>970.3778</b>  | <b>485.6926</b> | 324.1308        | 8  | D      | 9  | 1043.3929       | <b>522.2001</b> | 348.4691        |
|         | 1067.4306        | <b>534.2189</b> | 356.4817        | 9  | P      | 8  | <b>928.3659</b> | <b>464.6866</b> | <b>310.1268</b> |
|         | <b>1166.4990</b> | <b>583.7531</b> | 389.5045        | 10 | V      | 7  | <b>831.3132</b> | <b>416.1602</b> | 277.7759        |
|         | 1294.5940        | <b>647.8006</b> | 432.2028        | 11 | K      | 6  | <b>732.2448</b> | <b>366.6260</b> | 244.7531        |
|         | 1381.6260        | <b>691.3166</b> | 461.2135        | 12 | S      | 5  | <b>604.1498</b> | 302.5785        | 202.0548        |
|         | 1510.6686        | <b>755.8379</b> | 504.2277        | 13 | E      | 4  | <b>517.1178</b> | 259.0625        | 173.0441        |
|         | 1625.6955        | <b>813.3514</b> | <b>542.5700</b> | 14 | D      | 3  | <b>388.0752</b> | 194.5412        | 130.0299        |
|         | 1792.6939        | <b>896.8506</b> | <b>598.2361</b> | 15 | S[167] | 2  | <b>273.0482</b> | 137.0278        | 91.6876         |
|         |                  |                 |                 | 16 | S      | 1  | 106.0499        | 53.5286         | 36.0215         |

# Annotated spectra from Saleem et. al. 2009

R.LHHNS<sub>167</sub>VSDPVK<sub>136</sub>SEDS<sub>167</sub>S<sub>167</sub>-/-3

0.991

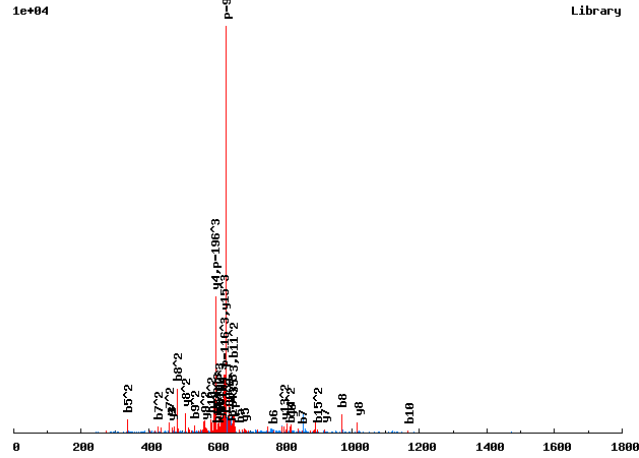

| Library | b <sup>1+</sup>  | b <sup>2+</sup> | b <sup>3+</sup> | #  | AA     | #  | y <sup>1+</sup>  | y <sup>2+</sup> | y <sup>3+</sup> |
|---------|------------------|-----------------|-----------------|----|--------|----|------------------|-----------------|-----------------|
|         | 114.0913         | 57.5493         | 38.7020         | 1  | L      | 16 |                  |                 |                 |
|         | 251.1502         | 126.0788        | 84.3883         | 2  | H      | 15 | 1872.6329        | 936.8201        | <b>624.8825</b> |
|         | 388.2092         | 194.6082        | 130.0746        | 3  | H      | 14 | 1735.5740        | 868.2907        | 579.1962        |
|         | 502.2521         | 251.6297        | 168.0889        | 4  | N      | 13 | 1598.5151        | <b>799.7612</b> | 533.5099        |
|         | <b>669.2505</b>  | <b>335.1289</b> | 223.7550        | 5  | S[167] | 12 | 1484.4722        | 742.7397        | 495.4956        |
|         | <b>768.3189</b>  | 384.6631        | 256.7778        | 6  | V      | 11 | 1317.4738        | 659.2406        | 439.8295        |
|         | <b>855.3509</b>  | <b>428.1791</b> | 285.7885        | 7  | S      | 10 | 1218.4054        | <b>609.7064</b> | 406.8067        |
|         | <b>970.3778</b>  | <b>485.6926</b> | 324.1308        | 8  | D      | 9  | 1131.3734        | <b>566.1903</b> | 377.7960        |
|         | 1067.4306        | <b>534.2189</b> | 356.4817        | 9  | P      | 8  | <b>1016.3465</b> | <b>508.6769</b> | 339.4537        |
|         | <b>1166.4990</b> | <b>583.7531</b> | 389.5045        | 10 | V      | 7  | <b>919.2937</b>  | <b>460.1505</b> | 307.1028        |
|         | 1302.6082        | <b>651.8077</b> | 434.8742        | 11 | K[136] | 6  | <b>820.2253</b>  | 410.6163        | 274.0799        |
|         | 1389.6402        | 695.3237        | 463.8849        | 12 | S      | 5  | <b>684.1161</b>  | 342.5617        | 228.7102        |
|         | 1518.6828        | 759.8450        | 506.8991        | 13 | E      | 4  | <b>597.0841</b>  | 299.0457        | 199.6996        |
|         | 1633.7097        | <b>817.3585</b> | 545.2414        | 14 | D      | 3  | <b>468.0415</b>  | 234.5244        | 156.6854        |
|         | 1800.7081        | <b>900.8577</b> | <b>600.9075</b> | 15 | S[167] | 2  | 353.0146         | 177.0109        | 118.3430        |
|         |                  |                 |                 | 16 | S[167] | 1  | 186.0162         | 93.5117         | 62.6769         |

# Annotated spectra from Saleem et. al. 2009

R.LHM<sub>147</sub>S<sub>167</sub>SS<sub>167</sub>LSQQK.N/2

0.9956

1e+04

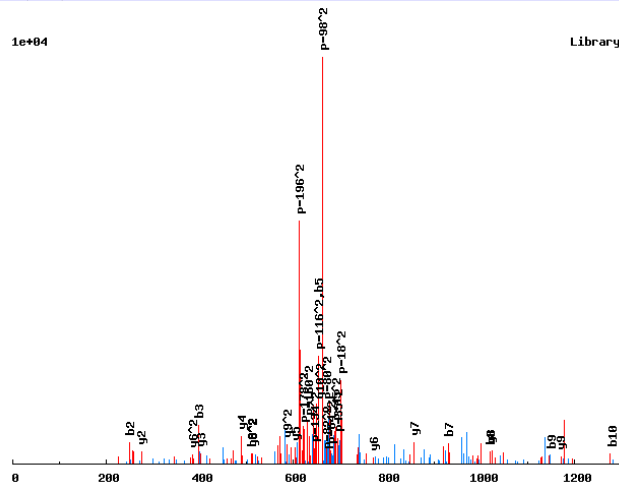

| Library | b <sup>1+</sup> | b <sup>2+</sup> | #  | AA     | #  | y <sup>1+</sup> | y <sup>2+</sup> |
|---------|-----------------|-----------------|----|--------|----|-----------------|-----------------|
|         | 114.0913        | 57.5493         | 1  | L      | 11 |                 |                 |
|         | 251.1502        | 126.0788        | 2  | H      | 10 | 1308.4691       | 654.7382        |
|         | 398.1856        | 199.5965        | 3  | M[147] | 9  | 1171.4102       | 586.2087        |
|         | 565.1840        | 283.0956        | 4  | S[167] | 8  | 1024.3748       | 512.6910        |
|         | 652.2160        | 326.6117        | 5  | S      | 7  | 857.3764        | 429.1919        |
|         | 819.2144        | 410.1108        | 6  | S[167] | 6  | 770.3444        | 385.6758        |
|         | 932.2985        | 466.6529        | 7  | L      | 5  | 603.3461        | 302.1767        |
|         | 1019.3305       | 510.1689        | 8  | S      | 4  | 490.2620        | 245.6346        |
|         | 1147.3891       | 574.1982        | 9  | Q      | 3  | 403.2300        | 202.1186        |
|         | 1275.4477       | 638.2275        | 10 | Q      | 2  | 275.1714        | 138.0893        |
|         |                 |                 | 11 | K      | 1  | 147.1128        | 74.0600         |

Annotated spectra from Saleem et. al. 2009

K.LIEAEKEGGS<sub>167</sub>ES<sub>167</sub>DS<sub>167</sub>EEDATAEK.K/3

0.9949

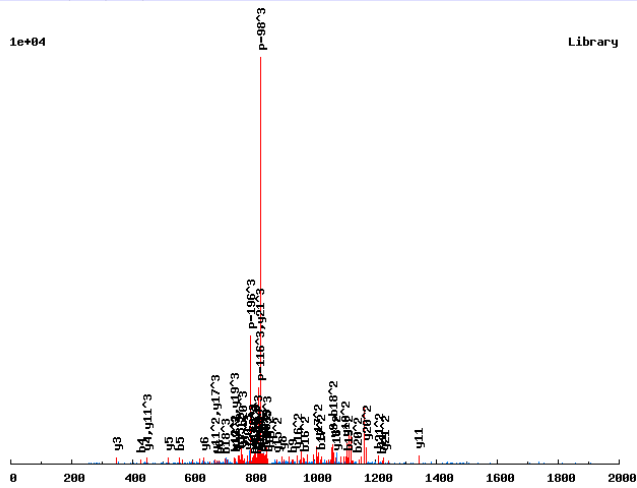

| Library | b <sup>1+</sup> | b <sup>2+</sup> | b <sup>3+</sup> | #  | AA     | #  | y <sup>1+</sup> | y <sup>2+</sup> | y <sup>3+</sup> |
|---------|-----------------|-----------------|-----------------|----|--------|----|-----------------|-----------------|-----------------|
|         | 114.0913        | 57.5493         | 38.7020         | 1  | L      | 22 |                 |                 |                 |
|         | 227.1754        | 114.0913        | 76.3967         | 2  | I      | 21 | 2450.8408       | 1225.9241       | 817.6185        |
|         | 356.2180        | 178.6126        | 119.4108        | 3  | E      | 20 | 2337.7568       | 1169.3820       | 779.9238        |
|         | 427.2551        | 214.1312        | 143.0899        | 4  | A      | 19 | 2208.7142       | 1104.8607       | 736.9096        |
|         | 556.2977        | 278.6525        | 186.1041        | 5  | E      | 18 | 2137.6771       | 1069.3422       | 713.2305        |
|         | 684.3927        | 342.7000        | 228.8024        | 6  | K      | 17 | 2008.6345       | 1004.8209       | 670.2164        |
|         | 813.4352        | 407.2213        | 271.8166        | 7  | E      | 16 | 1880.5395       | 940.7734        | 627.5180        |
|         | 870.4567        | 435.7320        | 290.8238        | 8  | G      | 15 | 1751.4969       | 876.2521        | 584.5038        |
|         | 927.4782        | 464.2427        | 309.8309        | 9  | G      | 14 | 1694.4755       | 847.7414        | 565.4967        |
|         | 1094.4765       | 547.7419        | 365.4970        | 10 | S[167] | 13 | 1637.4540       | 819.2307        | 546.4895        |
|         | 1223.5191       | 612.2632        | 408.5112        | 11 | E      | 12 | 1470.4557       | 735.7315        | 490.8234        |
|         | 1390.5175       | 695.7624        | 464.1773        | 12 | S[167] | 11 | 1341.4131       | 671.2102        | 447.8092        |
|         | 1505.5444       | 753.2758        | 502.5197        | 13 | D      | 10 | 1174.4147       | 587.7110        | 392.1431        |
|         | 1672.5428       | 836.7750        | 558.1858        | 14 | S[167] | 9  | 1059.3878       | 530.1975        | 353.8008        |
|         | 1801.5854       | 901.2963        | 601.2000        | 15 | E      | 8  | 892.3894        | 446.6983        | 298.1347        |
|         | 1930.6280       | 965.8176        | 644.2142        | 16 | E      | 7  | 763.3468        | 382.1771        | 255.1205        |
|         | 2045.6549       | 1023.3311       | 682.5565        | 17 | D      | 6  | 634.3042        | 317.6558        | 212.1063        |
|         | 2116.6920       | 1058.8496       | 706.2355        | 18 | A      | 5  | 519.2773        | 260.1423        | 173.7640        |
|         | 2217.7397       | 1109.3735       | 739.9181        | 19 | T      | 4  | 448.2402        | 224.6237        | 150.0849        |
|         | 2288.7768       | 1144.8920       | 763.5971        | 20 | A      | 3  | 347.1925        | 174.0999        | 116.4024        |
|         | 2417.8194       | 1209.4133       | 806.6113        | 21 | E      | 2  | 276.1554        | 138.5813        | 92.7233         |
|         |                 |                 |                 | 22 | K      | 1  | 147.1128        | 74.0600         | 49.7091         |

# Annotated spectra from Saleem et. al. 2009

K.LIEDS<sub>167</sub>DNDIDHAK.D/2

0.9991

1e+04

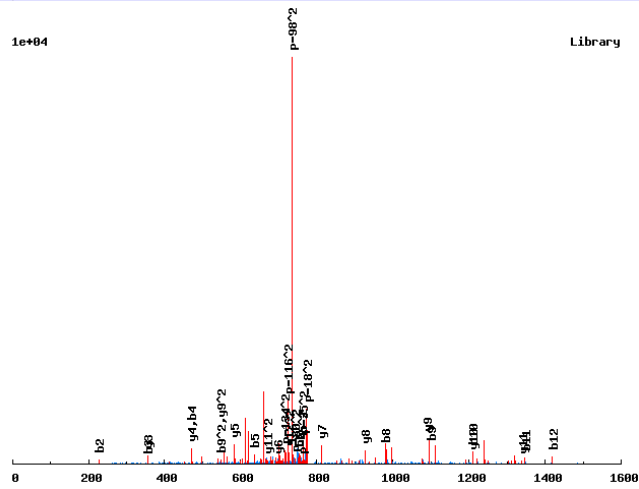

| Library | b <sup>1+</sup> | b <sup>2+</sup> | #  | AA     | #  | y <sup>1+</sup> | y <sup>2+</sup> |
|---------|-----------------|-----------------|----|--------|----|-----------------|-----------------|
|         | 114.0913        | 57.5493         | 1  | L      | 13 |                 |                 |
|         | 227.1754        | 114.0913        | 2  | I      | 12 | 1451.5686       | 726.2879        |
|         | 356.2180        | 178.6126        | 3  | E      | 11 | 1338.4845       | 669.7459        |
|         | 471.2449        | 236.1261        | 4  | D      | 10 | 1209.4419       | 605.2246        |
|         | 638.2433        | 319.6253        | 5  | S[167] | 9  | 1094.4150       | 547.7111        |
|         | 753.2702        | 377.1388        | 6  | D      | 8  | 927.4166        | 464.2120        |
|         | 867.3132        | 434.1602        | 7  | N      | 7  | 812.3897        | 406.6985        |
|         | 982.3401        | 491.6737        | 8  | D      | 6  | 698.3468        | 349.6770        |
|         | 1095.4242       | 548.2157        | 9  | I      | 5  | 583.3198        | 292.1636        |
|         | 1210.4511       | 605.7292        | 10 | D      | 4  | 470.2358        | 235.6215        |
|         | 1347.5100       | 674.2586        | 11 | H      | 3  | 355.2088        | 178.1080        |
|         | 1418.5471       | 709.7772        | 12 | A      | 2  | 218.1499        | 109.5786        |
|         |                 |                 | 13 | K      | 1  | 147.1128        | 74.0600         |

# Annotated spectra from Saleem et. al. 2009

R.LIEGDTGS<sub>167</sub>GHPDEQER<sub>166</sub>QS<sub>167</sub>LIAIER<sub>166</sub>E/3

0.9096

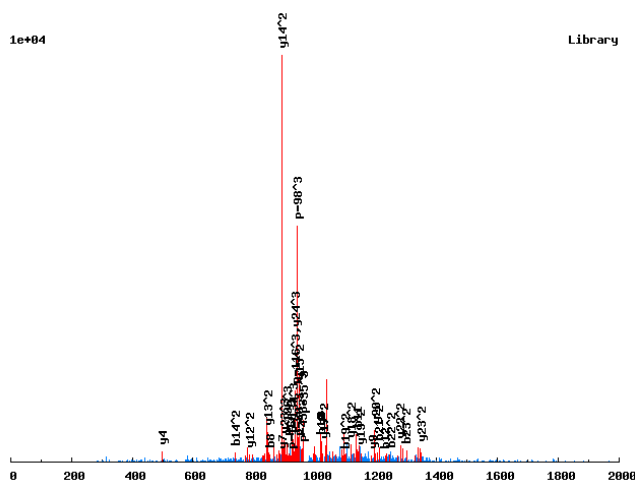

| Library | b <sup>1+</sup> | b <sup>2+</sup> | b <sup>3+</sup> | #  | AA      | #  | y <sup>1+</sup> | y <sup>2+</sup> | y <sup>3+</sup> |
|---------|-----------------|-----------------|-----------------|----|---------|----|-----------------|-----------------|-----------------|
|         | 114.0913        | 57.5493         | 38.7020         | 1  | L       | 25 |                 |                 |                 |
|         | 227.1754        | 114.0913        | 76.3967         | 2  | I       | 24 | 2806.2810       | 1403.6441       | 936.0985        |
|         | 356.2180        | 178.6126        | 119.4108        | 3  | E       | 23 | 2693.1970       | 1347.1021       | 898.4038        |
|         | 413.2394        | 207.1234        | 138.4180        | 4  | G       | 22 | 2564.1544       | 1282.5808       | 855.3896        |
|         | 528.2664        | 264.6368        | 176.7603        | 5  | D       | 21 | 2507.1329       | 1254.0701       | 836.3825        |
|         | 629.3141        | 315.1607        | 210.4429        | 6  | T       | 20 | 2392.1060       | 1196.5566       | 798.0402        |
|         | 686.3355        | 343.6714        | 229.4500        | 7  | G       | 19 | 2291.0583       | 1146.0328       | 764.3576        |
|         | 853.3339        | 427.1706        | 285.1162        | 8  | S [167] | 18 | 2234.0368       | 1117.5220       | 745.3505        |
|         | 910.3554        | 455.6813        | 304.1233        | 9  | G       | 17 | 2067.0385       | 1034.0229       | 689.6843        |
|         | 1023.4394       | 512.2233        | 341.8180        | 10 | I       | 16 | 2010.0170       | 1005.5121       | 670.6772        |
|         | 1136.5235       | 568.7654        | 379.5127        | 11 | I       | 15 | 1896.9329       | 948.9701        | 632.9825        |
|         | 1233.5762       | 617.2918        | 411.8636        | 12 | P       | 14 | 1783.8489       | 892.4281        | 595.2878        |
|         | 1348.6032       | 674.8052        | 450.2059        | 13 | D       | 13 | 1686.7961       | 843.9017        | 562.9369        |
|         | 1477.6458       | 739.3265        | 493.2201        | 14 | E       | 12 | 1571.7692       | 786.3882        | 524.5946        |
|         | 1605.7043       | 803.3558        | 535.9063        | 15 | Q       | 11 | 1442.7266       | 721.8669        | 481.5804        |
|         | 1734.7469       | 867.8771        | 578.9205        | 16 | E       | 10 | 1314.6680       | 657.8376        | 438.8942        |
|         | 1900.8563       | 950.9318        | 634.2903        | 17 | R [166] | 9  | 1185.6254       | 593.3163        | 395.8800        |
|         | 2028.9149       | 1014.9611       | 676.9765        | 18 | Q       | 8  | 1019.5160       | 510.2617        | 340.5102        |
|         | 2195.9133       | 1098.4603       | 732.6426        | 19 | S [167] | 7  | 891.4575        | 446.2324        | 297.8240        |
|         | 2308.9973       | 1155.0023       | 770.3373        | 20 | L       | 6  | 724.4591        | 362.7332        | 242.1579        |
|         | 2422.0814       | 1211.5443       | 808.0320        | 21 | I       | 5  | 611.3750        | 306.1912        | 204.4632        |
|         | 2493.1185       | 1247.0629       | 831.7110        | 22 | A       | 4  | 498.2910        | 249.6491        | 166.7685        |
|         | 2606.2025       | 1303.6049       | 869.4057        | 23 | I       | 3  | 427.2539        | 214.1306        | 143.0895        |
|         | 2735.2451       | 1368.1262       | 912.4199        | 24 | E       | 2  | 314.1698        | 157.5885        | 105.3948        |
|         |                 |                 |                 | 25 | R [166] | 1  | 185.1272        | 93.0672         | 62.3806         |

# Annotated spectra from Saleem et. al. 2009

K.LIHDK<sub>136</sub>S<sub>167</sub>PISS<sub>167</sub>PFTFSK<sub>136</sub>D/2

0.9967

1e+04

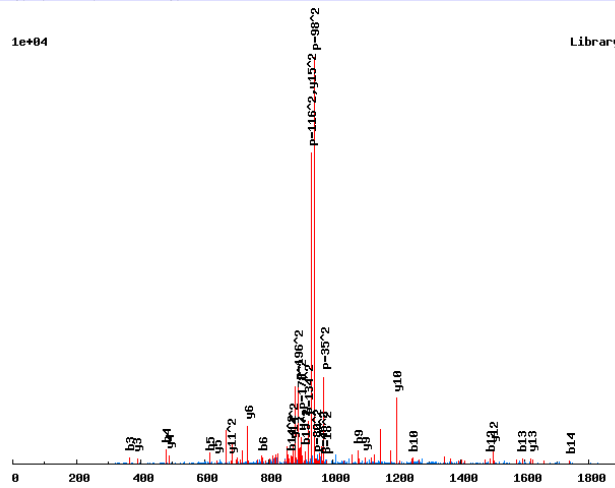

| Library | b <sup>1+</sup> | b <sup>2+</sup> | #  | AA     | #  | y <sup>1+</sup> | y <sup>2+</sup> |
|---------|-----------------|-----------------|----|--------|----|-----------------|-----------------|
|         | 114.0913        | 57.5493         | 1  | L      | 16 |                 |                 |
|         | 227.1754        | 114.0913        | 2  | I      | 15 | 1866.8409       | 933.9241        |
|         | 364.2343        | 182.6208        | 3  | H      | 14 | 1753.7569       | 877.3821        |
|         | 479.2612        | 240.1343        | 4  | D      | 13 | 1616.6980       | 808.8526        |
|         | 615.3704        | 308.1888        | 5  | K[136] | 12 | 1501.6710       | 751.3392        |
|         | 782.3688        | 391.6880        | 6  | S[167] | 11 | 1365.5619       | 683.2846        |
|         | 879.4215        | 440.2144        | 7  | P      | 10 | 1198.5635       | 599.7854        |
|         | 992.5056        | 496.7564        | 8  | I      | 9  | 1101.5107       | 551.2590        |
|         | 1079.5376       | 540.2725        | 9  | S      | 8  | 988.4267        | 494.7170        |
|         | 1246.5360       | 623.7716        | 10 | S[167] | 7  | 901.3946        | 451.2010        |
|         | 1343.5887       | 672.2980        | 11 | P      | 6  | 734.3963        | 367.7018        |
|         | 1490.6572       | 745.8322        | 12 | F      | 5  | 637.3435        | 319.1754        |
|         | 1591.7048       | 796.3561        | 13 | T      | 4  | 490.2751        | 245.6412        |
|         | 1738.7732       | 869.8903        | 14 | F      | 3  | 389.2274        | 195.1174        |
|         | 1825.8053       | 913.4063        | 15 | S      | 2  | 242.1590        | 121.5832        |
|         |                 |                 |    | K[136] | 1  | 155.1270        | 78.0671         |

# Annotated spectra from Saleem et. al. 2009

KLIIQGLS<sub>167</sub>DDDDAK<sub>136</sub>S<sub>167</sub>EQEFDVAVEDADDK<sub>136</sub>GFK<sub>136</sub>N/3

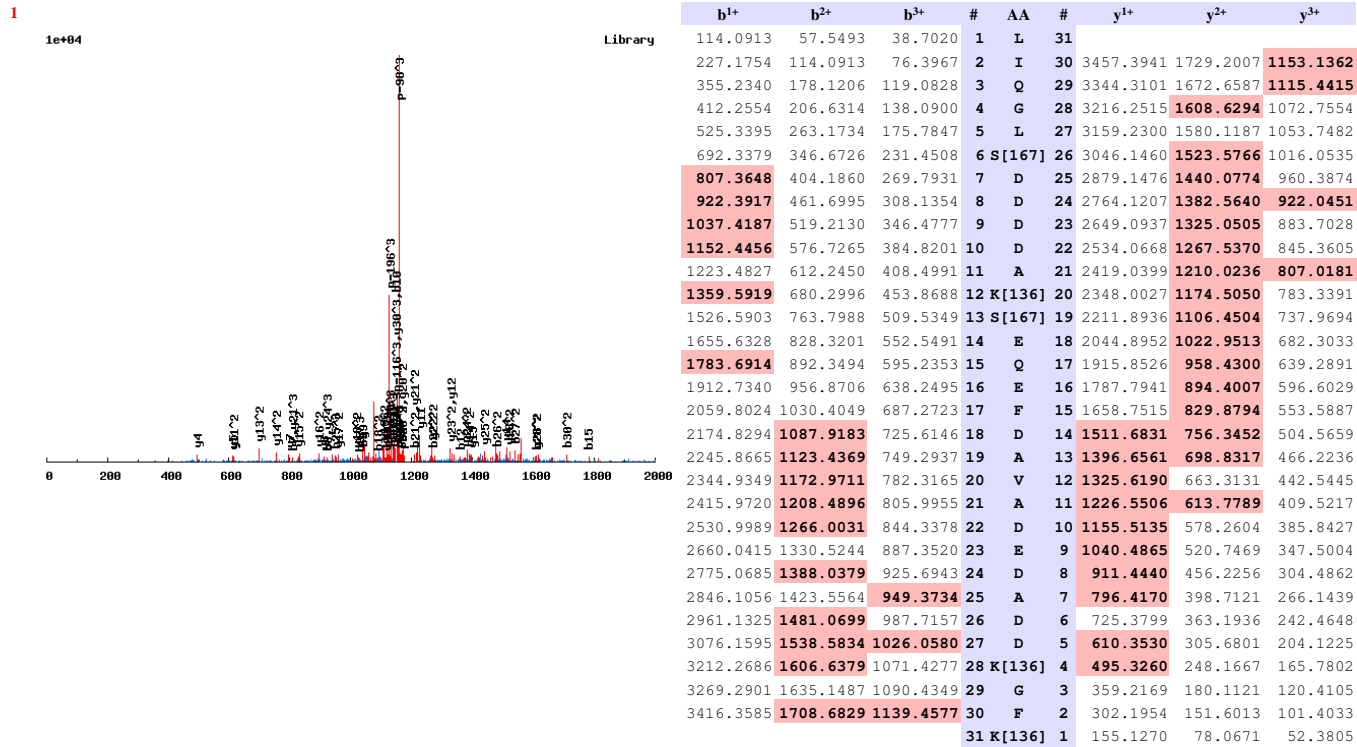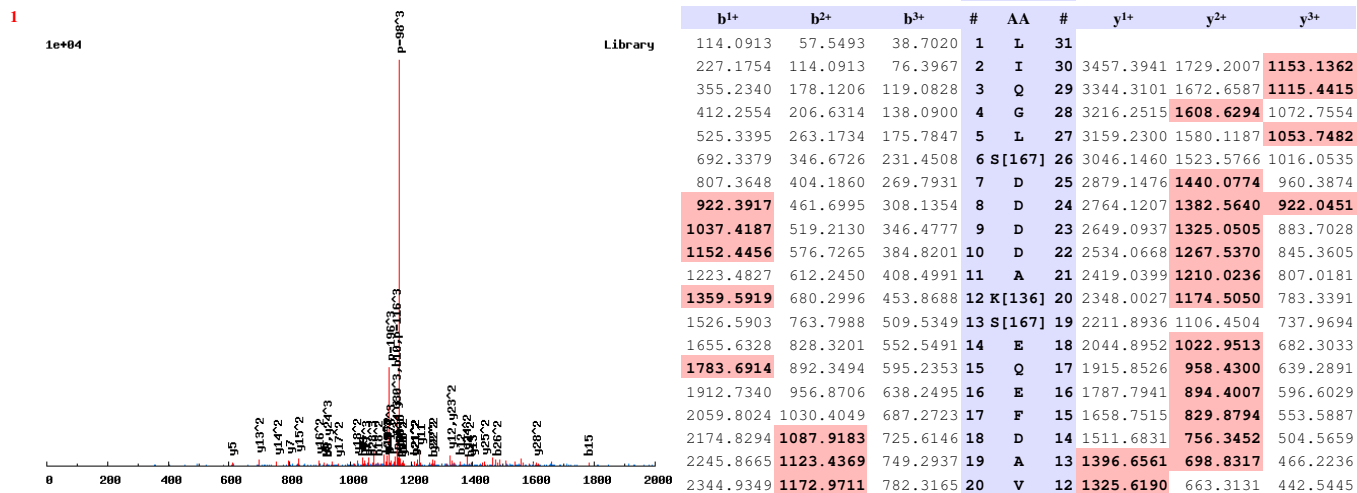



## Annotated spectra from Saleem et. al. 2009

|           |           |           |    |        |    |           |          |          |
|-----------|-----------|-----------|----|--------|----|-----------|----------|----------|
| 2415.9720 | 1208.4896 | 805.9955  | 21 | A      | 11 | 1226.5506 | 613.7789 | 409.5217 |
| 2530.9989 | 1266.0031 | 844.3378  | 22 | D      | 10 | 1155.5135 | 578.2604 | 385.8427 |
| 2660.0415 | 1330.5244 | 887.3520  | 23 | E      | 9  | 1040.4865 | 520.7469 | 347.5004 |
| 2775.0685 | 1388.0379 | 925.6943  | 24 | D      | 8  | 911.4440  | 456.2256 | 304.4862 |
| 2846.1056 | 1423.5564 | 949.3734  | 25 | A      | 7  | 796.4170  | 398.7121 | 266.1439 |
| 2961.1325 | 1481.0699 | 987.7157  | 26 | D      | 6  | 725.3799  | 363.1936 | 242.4648 |
| 3076.1595 | 1538.5834 | 1026.0580 | 27 | D      | 5  | 610.3530  | 305.6801 | 204.1225 |
| 3212.2686 | 1606.6379 | 1071.4277 | 28 | K[136] | 4  | 495.3260  | 248.1667 | 165.7802 |
| 3269.2901 | 1635.1487 | 1090.4349 | 29 | G      | 3  | 359.2169  | 180.1121 | 120.4105 |
| 3416.3585 | 1708.6829 | 1139.4577 | 30 | F      | 2  | 302.1954  | 151.6013 | 101.4033 |
|           |           |           | 31 | K[136] | 1  | 155.1270  | 78.0671  | 52.3805  |

# Annotated spectra from Saleem et. al. 2009

K.LIT<sub>181</sub>TYISLLK.L/2

0.9475

1e+04

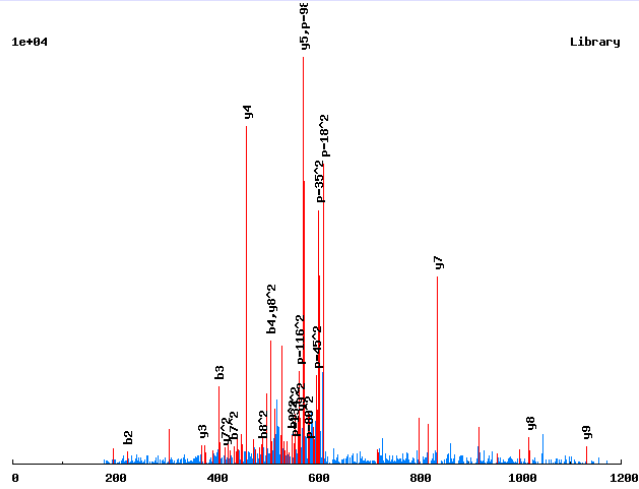

| Library | b <sup>1+</sup> | b <sup>2+</sup> | #  | AA     | #  | y <sup>1+</sup> | y <sup>2+</sup> |
|---------|-----------------|-----------------|----|--------|----|-----------------|-----------------|
|         | 114.0913        | 57.5493         | 1  | L      | 10 |                 |                 |
|         | 227.1754        | 114.0913        | 2  | I      | 9  | 1131.6061       | 566.3067        |
|         | 408.1894        | 204.5983        | 3  | T[181] | 8  | 1018.5220       | 509.7647        |
|         | 509.2371        | 255.1222        | 4  | T      | 7  | 837.5080        | 419.2577        |
|         | 672.3004        | 336.6539        | 5  | Y      | 6  | 736.4603        | 368.7338        |
|         | 785.3845        | 393.1959        | 6  | I      | 5  | 573.3970        | 287.2021        |
|         | 872.4165        | 436.7119        | 7  | S      | 4  | 460.3130        | 230.6601        |
|         | 985.5006        | 493.2539        | 8  | L      | 3  | 373.2809        | 187.1441        |
|         | 1098.5846       | 549.7960        | 9  | L      | 2  | 260.1969        | 130.6021        |
|         |                 |                 | 10 | K      | 1  | 147.1128        | 74.0600         |

# Annotated spectra from Saleem et. al. 2009

R.LKAS<sub>167</sub>S<sub>167</sub>LDLM<sub>147</sub>AEVKPER.L/3

0.986

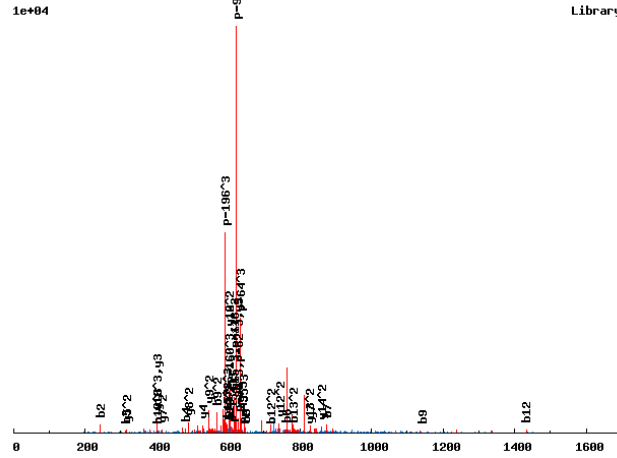

| Library | b <sup>1+</sup> | b <sup>2+</sup> | b <sup>3+</sup> | #  | AA      | #  | y <sup>1+</sup> | y <sup>2+</sup> | y <sup>3+</sup> |
|---------|-----------------|-----------------|-----------------|----|---------|----|-----------------|-----------------|-----------------|
|         | 114.0913        | 57.5493         | 38.7020         | 1  | L       | 16 |                 |                 |                 |
|         | 242.1863        | 121.5968        | 81.4003         | 2  | K       | 15 | 1849.8166       | 925.4120        | 617.2771        |
|         | 313.2234        | 157.1153        | 105.0793        | 3  | A       | 14 | 1721.7217       | 861.3645        | 574.5787        |
|         | 480.2218        | 240.6145        | 160.7454        | 4  | S [167] | 13 | 1650.6846       | 825.8459        | 550.8997        |
|         | 647.2201        | 324.1137        | 216.4116        | 5  | S [167] | 12 | 1483.6862       | 742.3467        | 495.2336        |
|         | 760.3042        | 380.6557        | 254.1063        | 6  | L       | 11 | 1316.6878       | 658.8476        | 439.5675        |
|         | 875.3311        | 438.1692        | 292.4486        | 7  | D       | 10 | 1203.6038       | 602.3055        | 401.8728        |
|         | 988.4152        | 494.7112        | 330.1433        | 8  | L       | 9  | 1088.5768       | 544.7921        | 363.5305        |
|         | 1135.4506       | 568.2289        | 379.1551        | 9  | M [147] | 8  | 975.4928        | 488.2500        | 325.8358        |
|         | 1206.4877       | 603.7475        | 402.8341        | 10 | A       | 7  | 828.4574        | 414.7323        | 276.8240        |
|         | 1335.5303       | 668.2688        | 445.8483        | 11 | E       | 6  | 757.4203        | 379.2138        | 253.1449        |
|         | 1434.5987       | 717.8030        | 478.8711        | 12 | V       | 5  | 628.3777        | 314.6925        | 210.1307        |
|         | 1562.6937       | 781.8505        | 521.5694        | 13 | K       | 4  | 529.3093        | 265.1583        | 177.1079        |
|         | 1659.7464       | 830.3769        | 553.9203        | 14 | P       | 3  | 401.2143        | 201.1108        | 134.4096        |
|         | 1788.7890       | 894.8981        | 596.9345        | 15 | E       | 2  | 304.1615        | 152.5844        | 102.0587        |
|         |                 |                 |                 | 16 | R       | 1  | 175.1190        | 88.0631         | 59.0445         |

# Annotated spectra from Saleem et. al. 2009

R.LK<sub>136</sub>EEVLT<sub>181</sub>PTTSAS<sub>167</sub>TPHR<sub>166</sub>I/3

0.9997

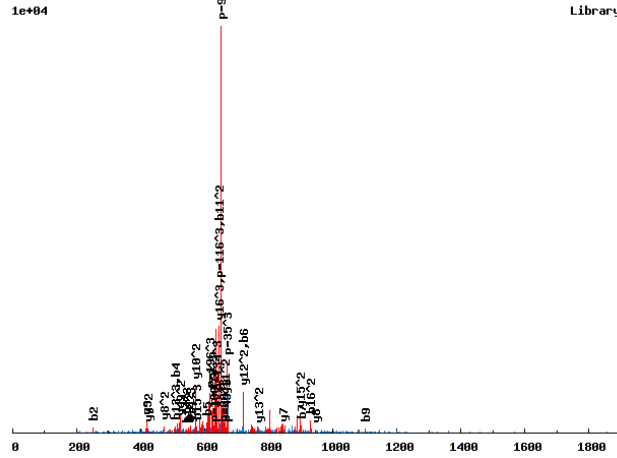

| Library | b <sup>1+</sup> | b <sup>2+</sup> | b <sup>3+</sup> | #  | AA     | #  | y <sup>1+</sup> | y <sup>2+</sup> | y <sup>3+</sup> |
|---------|-----------------|-----------------|-----------------|----|--------|----|-----------------|-----------------|-----------------|
|         | 114.0913        | 57.5493         | 38.7020         | 1  | L      | 17 |                 |                 |                 |
|         | 250.2005        | 125.6039        | 84.0717         | 2  | K[136] | 16 | 1931.8630       | 966.4351        | 644.6259        |
|         | 379.2431        | 190.1252        | 127.0859        | 3  | E      | 15 | 1795.7539       | 898.3806        | 599.2561        |
|         | 508.2857        | 254.6465        | 170.1001        | 4  | E      | 14 | 1666.7113       | 833.8593        | 556.2419        |
|         | 607.3541        | 304.1807        | 203.1229        | 5  | V      | 13 | 1537.6687       | 769.3380        | 513.2277        |
|         | 720.4381        | 360.7227        | 240.8176        | 6  | L      | 12 | 1438.6003       | 719.8038        | 480.2049        |
|         | 901.4522        | 451.2297        | 301.1556        | 7  | T[181] | 11 | 1325.5162       | 663.2617        | 442.5103        |
|         | 998.5049        | 499.7561        | 333.5065        | 8  | P      | 10 | 1144.5022       | 572.7547        | 382.1723        |
|         | 1099.5526       | 550.2799        | 367.1891        | 9  | T      | 9  | 1047.4494       | 524.2284        | 349.8213        |
|         | 1200.6003       | 600.8038        | 400.8716        | 10 | T      | 8  | 946.4018        | 473.7045        | 316.1388        |
|         | 1287.6323       | 644.3198        | 429.8823        | 11 | S      | 7  | 845.3541        | 423.1807        | 282.4562        |
|         | 1358.6694       | 679.8383        | 453.5613        | 12 | A      | 6  | 758.3220        | 379.6647        | 253.4455        |
|         | 1525.6678       | 763.3375        | 509.2274        | 13 | S[167] | 5  | 687.2849        | 344.1461        | 229.7665        |
|         | 1626.7155       | 813.8614        | 542.9100        | 14 | T      | 4  | 520.2866        | 260.6469        | 174.1004        |
|         | 1723.7682       | 862.3878        | 575.2609        | 15 | P      | 3  | 419.2389        | 210.1231        | 140.4178        |
|         | 1860.8271       | 930.9172        | 620.9472        | 16 | H      | 2  | 322.1861        | 161.5967        | 108.0669        |
|         |                 |                 |                 | 17 | R[166] | 1  | 185.1272        | 93.0672         | 62.3806         |

# Annotated spectra from Saleem et. al. 2009

K.LK<sub>136</sub>IT<sub>181</sub>DS<sub>167</sub>NLENMEDVEAK<sub>136</sub>S/2

0.9996

1e+04

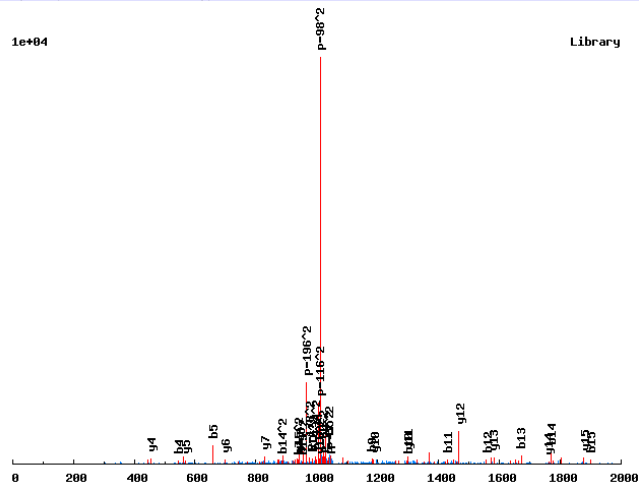

| Library | b <sup>1+</sup> | b <sup>2+</sup> | #  | AA     | #  | y <sup>1+</sup> | y <sup>2+</sup> |
|---------|-----------------|-----------------|----|--------|----|-----------------|-----------------|
|         | 114.0913        | 57.5493         | 1  | L      | 17 |                 |                 |
|         | 250.2005        | 125.6039        | 2  | K[136] | 16 | 2011.8302       | 1006.4187       |
|         | 363.2846        | 182.1459        | 3  | I      | 15 | 1875.7210       | 938.3641        |
|         | 544.2986        | 272.6529        | 4  | T[181] | 14 | 1762.6370       | 881.8221        |
|         | 659.3255        | 330.1664        | 5  | D      | 13 | 1581.6229       | 791.3151        |
|         | 826.3239        | 413.6656        | 6  | S[167] | 12 | 1466.5960       | 733.8016        |
|         | 940.3668        | 470.6870        | 7  | N      | 11 | 1299.5976       | 650.3025        |
|         | 1053.4509       | 527.2291        | 8  | L      | 10 | 1185.5547       | 593.2810        |
|         | 1182.4935       | 591.7504        | 9  | E      | 9  | 1072.4706       | 536.7390        |
|         | 1296.5364       | 648.7718        | 10 | N      | 8  | 943.4281        | 472.2177        |
|         | 1427.5769       | 714.2921        | 11 | M      | 7  | 829.3851        | 415.1962        |
|         | 1556.6195       | 778.8134        | 12 | E      | 6  | 698.3446        | 349.6760        |
|         | 1671.6464       | 836.3268        | 13 | D      | 5  | 569.3020        | 285.1547        |
|         | 1770.7148       | 885.8610        | 14 | V      | 4  | 454.2751        | 227.6412        |
|         | 1899.7574       | 950.3823        | 15 | E      | 3  | 355.2067        | 178.1070        |
|         | 1970.7945       | 985.9009        | 16 | A      | 2  | 226.1641        | 113.5857        |
|         |                 |                 | 17 | K[136] | 1  | 155.1270        | 78.0671         |

Annotated spectra from Saleem et. al. 2009

K.LKRPASSGSSS<sub>167</sub>S<sub>167</sub>-TSVVK.T/3

0.9603

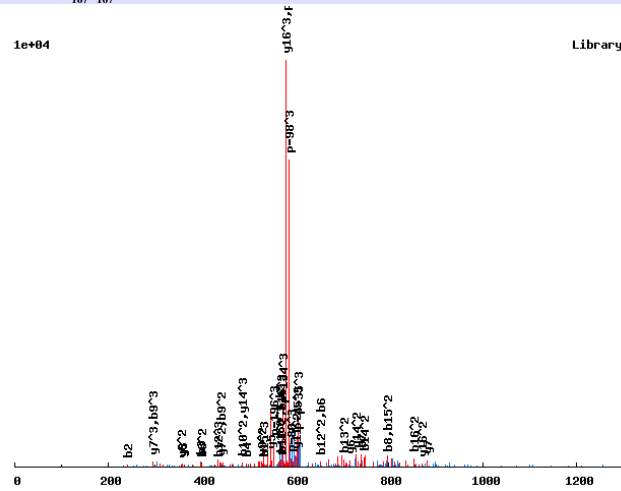

| Library | b <sup>1+</sup> | b <sup>2+</sup> | b <sup>3+</sup> | #  | AA     | #  | y <sup>1+</sup> | y <sup>2+</sup> | y <sup>3+</sup> |
|---------|-----------------|-----------------|-----------------|----|--------|----|-----------------|-----------------|-----------------|
|         | 114.0913        | 57.5493         | 38.7020         | 1  | L      | 17 |                 |                 |                 |
|         | 242.1863        | 121.5968        | 81.4003         | 2  | K      | 16 | 1739.7361       | 870.3717        | 580.5836        |
|         | 398.2874        | 199.6473        | 133.4340        | 3  | R      | 15 | 1611.6411       | 806.3242        | 537.8852        |
|         | 495.3402        | 248.1737        | 165.7849        | 4  | P      | 14 | 1455.5400       | 728.2737        | 485.8515        |
|         | 566.3773        | 283.6923        | 189.4639        | 5  | A      | 13 | 1358.4873       | 679.7473        | 453.5006        |
|         | 653.4093        | 327.2083        | 218.4746        | 6  | S      | 12 | 1287.4502       | 644.2287        | 429.8216        |
|         | 740.4413        | 370.7243        | 247.4853        | 7  | S      | 11 | 1200.4181       | 600.7127        | 400.8109        |
|         | 797.4628        | 399.2350        | 266.4925        | 8  | G      | 10 | 1113.3861       | 557.1967        | 371.8002        |
|         | 884.4948        | 442.7511        | 295.5031        | 9  | S      | 9  | 1056.3646       | 528.6860        | 352.7931        |
|         | 971.5269        | 486.2671        | 324.5138        | 10 | S      | 8  | 969.3326        | 485.1699        | 323.7824        |
|         | 1138.5252       | 569.7663        | 380.1799        | 11 | S[167] | 7  | 882.3006        | 441.6539        | 294.7717        |
|         | 1305.5236       | 653.2654        | 435.8460        | 12 | S[167] | 6  | 715.3022        | 358.1547        | 239.1056        |
|         | 1406.5713       | 703.7893        | 469.5286        | 13 | T      | 5  | 548.3039        | 274.6556        | 183.4395        |
|         | 1493.6033       | 747.3053        | 498.5393        | 14 | S      | 4  | 447.2562        | 224.1317        | 149.7569        |
|         | 1592.6717       | 796.8395        | 531.5621        | 15 | V      | 3  | 360.2241        | 180.6157        | 120.7462        |
|         | 1706.7146       | 853.8610        | 569.5764        | 16 | N      | 2  | 261.1557        | 131.0815        | 87.7234         |
|         |                 |                 |                 | 17 | K      | 1  | 147.1128        | 74.0600         | 49.7091         |

# Annotated spectra from Saleem et. al. 2009

K.LK<sub>136</sub>VAR<sub>166</sub>PLS<sub>167</sub>VPGS<sub>167</sub>PR<sub>166</sub>D/3

0.9985

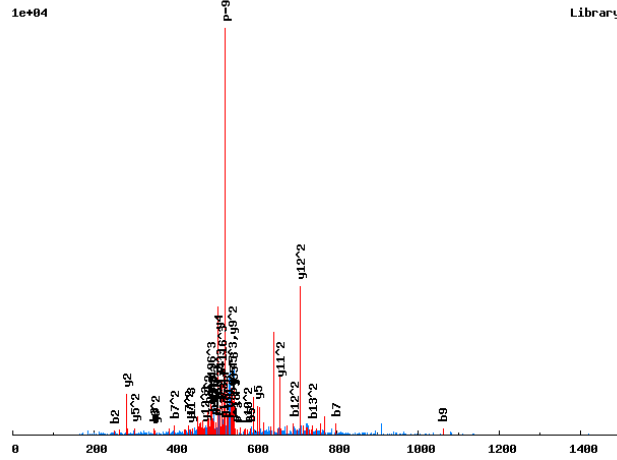

| Library | b <sup>1+</sup> | b <sup>2+</sup> | b <sup>3+</sup> | #  | AA     | #  | y <sup>1+</sup> | y <sup>2+</sup> | y <sup>3+</sup> |
|---------|-----------------|-----------------|-----------------|----|--------|----|-----------------|-----------------|-----------------|
|         | 114.0913        | 57.5493         | 38.7020         | 1  | L      | 14 |                 |                 |                 |
|         | 250.2005        | 125.6039        | 84.0717         | 2  | K[136] | 13 | 1551.7802       | 776.3937        | 517.9316        |
|         | 349.2689        | 175.1381        | 117.0945        | 3  | V      | 12 | 1415.6711       | 708.3392        | 472.5619        |
|         | 420.3060        | 210.6566        | 140.7735        | 4  | A      | 11 | 1316.6026       | 658.8050        | 439.5391        |
|         | 586.4154        | 293.7113        | 196.1433        | 5  | R[166] | 10 | 1245.5655       | 623.2864        | 415.8600        |
|         | 683.4682        | 342.2377        | 228.4942        | 6  | P      | 9  | 1079.4562       | 540.2317        | 360.4902        |
|         | 796.5522        | 398.7797        | 266.1889        | 7  | L      | 8  | 982.4034        | 491.7053        | 328.1393        |
|         | 963.5506        | 482.2789        | 321.8550        | 8  | S[167] | 7  | 869.3193        | 435.1633        | 290.4446        |
|         | 1062.6190       | 531.8131        | 354.8778        | 9  | V      | 6  | 702.3210        | 351.6641        | 234.7785        |
|         | 1159.6717       | 580.3395        | 387.2288        | 10 | P      | 5  | 603.2526        | 302.1299        | 201.7557        |
|         | 1216.6932       | 608.8502        | 406.2359        | 11 | G      | 4  | 506.1998        | 253.6035        | 169.4048        |
|         | 1383.6916       | 692.3494        | 461.9020        | 12 | S[167] | 3  | 449.1783        | 225.0928        | 150.3976        |
|         | 1480.7443       | 740.8758        | 494.2530        | 13 | P      | 2  | 282.1800        | 141.5936        | 94.7315         |
|         |                 |                 |                 | 14 | R[166] | 1  | 185.1272        | 93.0672         | 62.3806         |

# Annotated spectra from Saleem et. al. 2009

R.LLEEVLAS<sub>167</sub>PSS<sub>167</sub>THNK<sub>136</sub>T/2

0.9982

1e+04

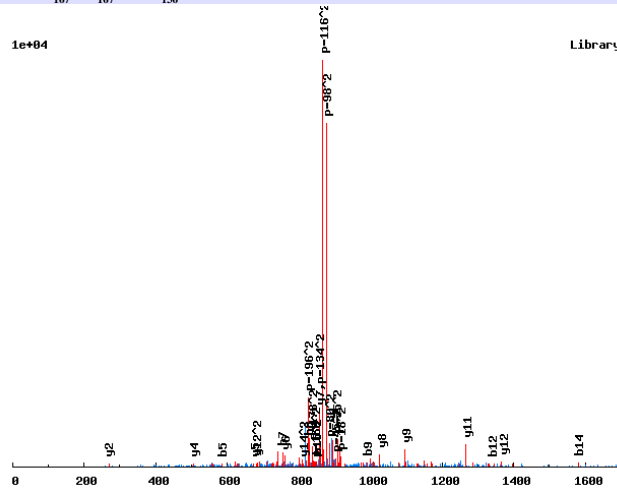

| Library | b <sup>1+</sup> | b <sup>2+</sup> | #  | AA     | #  | y <sup>1+</sup> | y <sup>2+</sup> |
|---------|-----------------|-----------------|----|--------|----|-----------------|-----------------|
|         | 114.0913        | 57.5493         | 1  | L      | 16 |                 |                 |
|         | 227.1754        | 114.0913        | 2  | L      | 15 | 1736.7383       | 868.8728        |
|         | 356.2180        | 178.6126        | 3  | E      | 14 | 1623.6543       | 812.3308        |
|         | 485.2606        | 243.1339        | 4  | E      | 13 | 1494.6117       | 747.8095        |
|         | 584.3290        | 292.6681        | 5  | V      | 12 | 1365.5691       | 683.2882        |
|         | 641.3505        | 321.1789        | 6  | G      | 11 | 1266.5007       | 633.7540        |
|         | 754.4345        | 377.7209        | 7  | L      | 10 | 1209.4792       | 605.2432        |
|         | 825.4716        | 413.2395        | 8  | A      | 9  | 1096.3951       | 548.7012        |
|         | 992.4700        | 496.7386        | 9  | S[167] | 8  | 1025.3580       | 513.1827        |
|         | 1089.5227       | 545.2650        | 10 | P      | 7  | 858.3597        | 429.6835        |
|         | 1176.5548       | 588.7810        | 11 | S      | 6  | 761.3069        | 381.1571        |
|         | 1343.5531       | 672.2802        | 12 | S[167] | 5  | 674.2749        | 337.6411        |
|         | 1444.6008       | 722.8040        | 13 | T      | 4  | 507.2765        | 254.1419        |
|         | 1581.6597       | 791.3335        | 14 | H      | 3  | 406.2288        | 203.6181        |
|         | 1695.7027       | 848.3550        | 15 | N      | 2  | 269.1699        | 135.0886        |
|         |                 |                 | 16 | K[136] | 1  | 155.1270        | 78.0671         |



# Annotated spectra from Saleem et. al. 2009

R.LLLSPAS<sub>167</sub>S<sub>167</sub>NVDDDR<sub>166</sub>NR<sub>166</sub>G/2

0.9993

1e+04

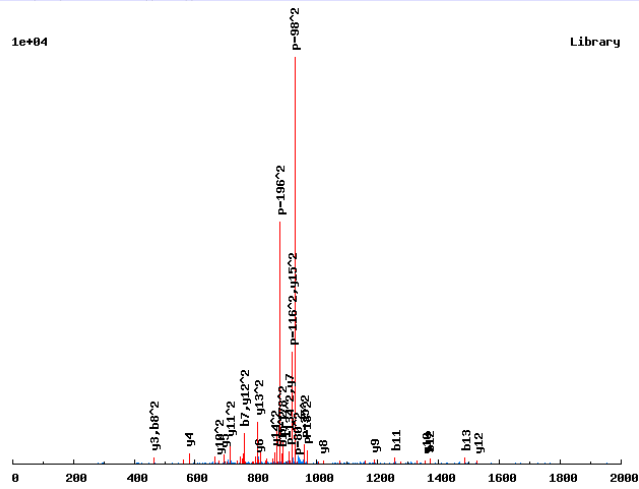

| Library | b <sup>1+</sup> | b <sup>2+</sup> | #  | AA     | #  | y <sup>1+</sup> | y <sup>2+</sup> |
|---------|-----------------|-----------------|----|--------|----|-----------------|-----------------|
|         | 114.0913        | 57.5493         | 1  | L      | 16 |                 |                 |
|         | 227.1754        | 114.0913        | 2  | L      | 15 | 1838.7584       | 919.8829        |
|         | 340.2595        | 170.6334        | 3  | L      | 14 | 1725.6744       | 863.3408        |
|         | 427.2915        | 214.1494        | 4  | S      | 13 | 1612.5903       | 806.7988        |
|         | 524.3442        | 262.6758        | 5  | P      | 12 | 1525.5583       | 763.2828        |
|         | 595.3814        | 298.1943        | 6  | A      | 11 | 1428.5055       | 714.7564        |
|         | 762.3797        | 381.6935        | 7  | S[167] | 10 | 1357.4684       | 679.2378        |
|         | 929.3781        | 465.1927        | 8  | S[167] | 9  | 1190.4700       | 595.7387        |
|         | 1043.4210       | 522.2141        | 9  | N      | 8  | 1023.4717       | 512.2395        |
|         | 1142.4894       | 571.7484        | 10 | V      | 7  | 909.4288        | 455.2180        |
|         | 1257.5164       | 629.2618        | 11 | D      | 6  | 810.3603        | 405.6838        |
|         | 1372.5433       | 686.7753        | 12 | D      | 5  | 695.3334        | 348.1703        |
|         | 1487.5702       | 744.2888        | 13 | D      | 4  | 580.3065        | 290.6569        |
|         | 1653.6796       | 827.3435        | 14 | R[166] | 3  | 465.2795        | 233.1434        |
|         | 1767.7226       | 884.3649        | 15 | N      | 2  | 299.1701        | 150.0887        |
|         |                 |                 | 16 | R[166] | 1  | 185.1272        | 93.0672         |

# Annotated spectra from Saleem et. al. 2009

K.LLPDGDVAVDALS<sub>167</sub>R.K/2

0.988

1e+04

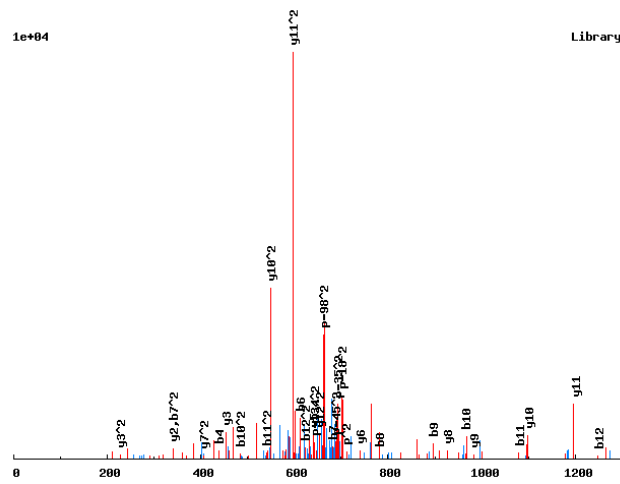

| Library | b <sup>1+</sup> | b <sup>2+</sup> | #  | AA      | #  | y <sup>1+</sup> | y <sup>2+</sup> |
|---------|-----------------|-----------------|----|---------|----|-----------------|-----------------|
|         | 114.0913        | 57.5493         | 1  | L       | 13 |                 |                 |
|         | 227.1754        | 114.0913        | 2  | L       | 12 | 1308.5831       | 654.7952        |
|         | 324.2282        | 162.6177        | 3  | P       | 11 | 1195.4990       | 598.2532        |
|         | 439.2551        | 220.1312        | 4  | D       | 10 | 1098.4463       | 549.7268        |
|         | 496.2766        | 248.6419        | 5  | G       | 9  | 983.4193        | 492.2133        |
|         | 611.3035        | 306.1554        | 6  | D       | 8  | 926.3979        | 463.7026        |
|         | 682.3406        | 341.6739        | 7  | A       | 7  | 811.3709        | 406.1891        |
|         | 781.4090        | 391.2081        | 8  | V       | 6  | 740.3338        | 370.6706        |
|         | 896.4360        | 448.7216        | 9  | D       | 5  | 641.2654        | 321.1364        |
|         | 967.4731        | 484.2402        | 10 | A       | 4  | 526.2385        | 263.6229        |
|         | 1080.5571       | 540.7822        | 11 | L       | 3  | 455.2014        | 228.1043        |
|         | 1247.5555       | 624.2814        | 12 | S [167] | 2  | 342.1173        | 171.5623        |
|         |                 |                 | 13 | R       | 1  | 175.1190        | 88.0631         |

# Annotated spectra from Saleem et. al. 2009

RLLSAETAS<sub>167</sub>KER.L/2

0.7289

1e+04

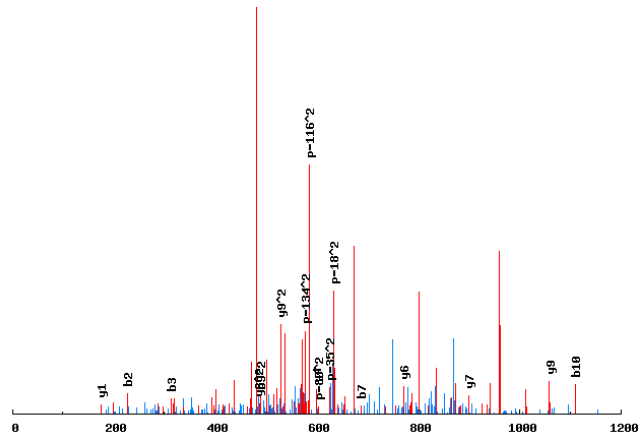

| Library | b <sup>1+</sup> | b <sup>2+</sup> | #  | AA      | #  | y <sup>1+</sup> | y <sup>2+</sup> |
|---------|-----------------|-----------------|----|---------|----|-----------------|-----------------|
|         | 114.0913        | 57.5493         | 1  | L       | 11 |                 |                 |
|         | 227.1754        | 114.0913        | 2  | L       | 10 | 1171.5354       | 586.2714        |
|         | 314.2074        | 157.6074        | 3  | S       | 9  | 1058.4514       | 529.7293        |
|         | 385.2445        | 193.1259        | 4  | A       | 8  | 971.4194        | 486.2133        |
|         | 514.2871        | 257.6472        | 5  | E       | 7  | 900.3822        | 450.6948        |
|         | 615.3348        | 308.1710        | 6  | T       | 6  | 771.3397        | 386.1735        |
|         | 686.3719        | 343.6896        | 7  | A       | 5  | 670.2920        | 335.6496        |
|         | 853.3703        | 427.1888        | 8  | S [167] | 4  | 599.2549        | 300.1311        |
|         | 981.4652        | 491.2363        | 9  | K       | 3  | 432.2565        | 216.6319        |
|         | 1110.5078       | 555.7576        | 10 | E       | 2  | 304.1615        | 152.5844        |
|         |                 |                 | 11 | R       | 1  | 175.1190        | 88.0631         |

# Annotated spectra from Saleem et. al. 2009

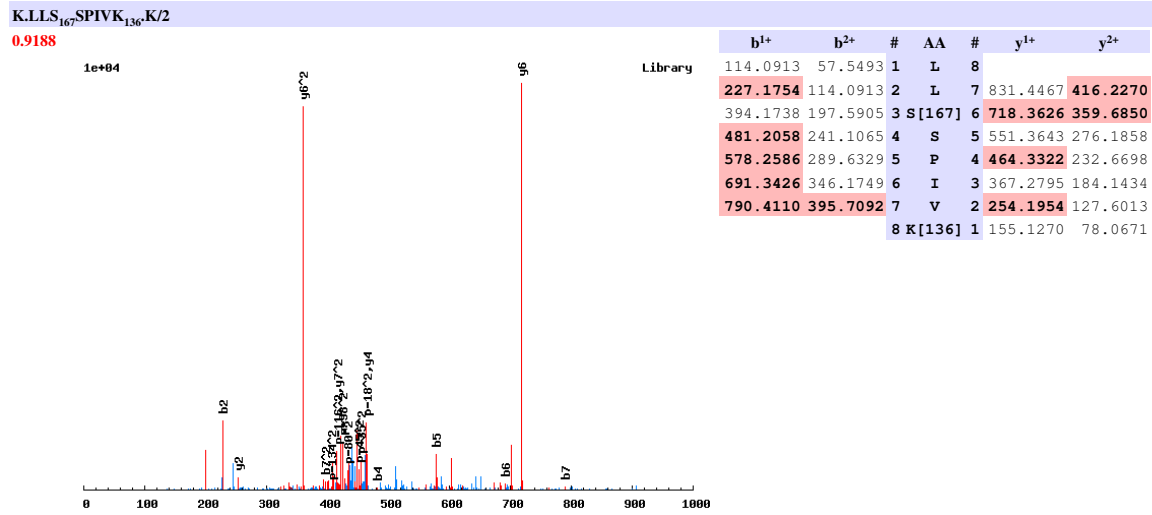

Annotated spectra from Saleem et. al. 2009

K.LLST<sub>181</sub>PS<sub>167</sub>PVNR<sub>166</sub>S/2

0.9732

1e+04

| Library | b <sup>1+</sup>  | b <sup>2+</sup> | #  | AA     | #  | y <sup>1+</sup>  | y <sup>2+</sup> |
|---------|------------------|-----------------|----|--------|----|------------------|-----------------|
|         | 114.0913         | 57.5493         | 1  | L      | 10 |                  |                 |
|         | <b>227.1754</b>  | 114.0913        | 2  | L      | 9  | 1140.4725        | <b>570.7399</b> |
|         | <b>314.2074</b>  | 157.6074        | 3  | S      | 8  | <b>1027.3885</b> | <b>514.1979</b> |
|         | <b>495.2214</b>  | 248.1144        | 4  | T[181] | 7  | <b>940.3565</b>  | <b>470.6819</b> |
|         | <b>592.2742</b>  | 296.6407        | 5  | P      | 6  | <b>759.3424</b>  | <b>380.1749</b> |
|         | <b>759.2726</b>  | 380.1399        | 6  | S[167] | 5  | <b>662.2897</b>  | 331.6485        |
|         | 856.3253         | <b>428.6663</b> | 7  | P      | 4  | 495.2913         | 248.1493        |
|         | <b>955.3937</b>  | 478.2005        | 8  | V      | 3  | <b>398.2386</b>  | <b>199.6229</b> |
|         | <b>1069.4367</b> | 535.2220        | 9  | N      | 2  | <b>299.1701</b>  | 150.0887        |
|         |                  |                 | 10 | R[166] | 1  | 185.1272         | 93.0672         |

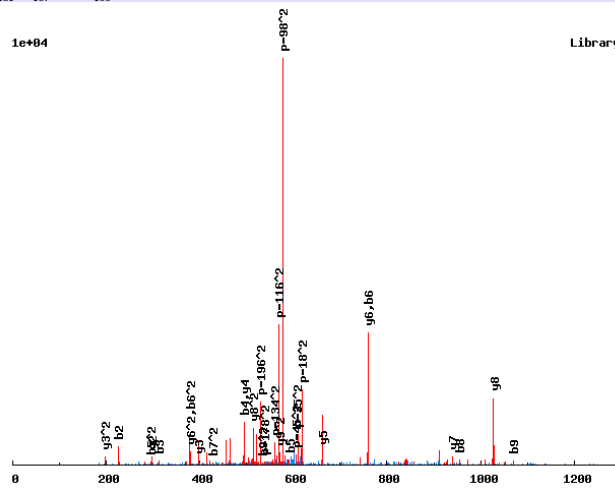

# Annotated spectra from Saleem et. al. 2009

R.LLTPQTS<sub>16</sub>SNHALSK.M/2

0.7409

1e+04

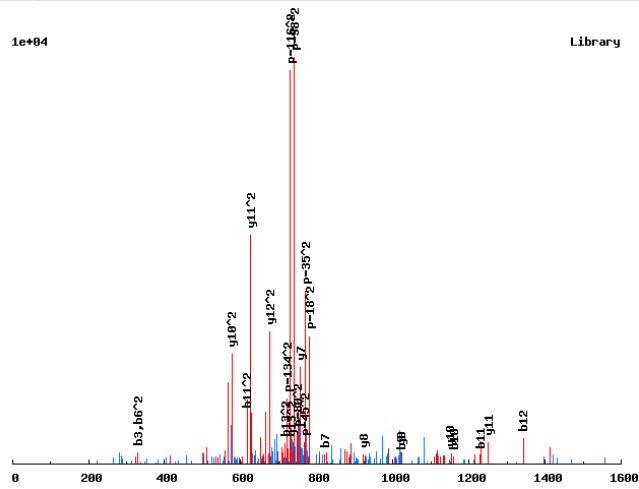

| Library | b <sup>1+</sup> | b <sup>2+</sup> | #  | AA     | #  | y <sup>1+</sup> | y <sup>2+</sup> |
|---------|-----------------|-----------------|----|--------|----|-----------------|-----------------|
|         | 114.0913        | 57.5493         | 1  | L      | 14 |                 |                 |
|         | 227.1754        | 114.0913        | 2  | L      | 13 | 1463.6890       | 732.3481        |
|         | 328.2231        | 164.6152        | 3  | T      | 12 | 1350.6049       | 675.8061        |
|         | 425.2758        | 213.1416        | 4  | P      | 11 | 1249.5573       | 625.2823        |
|         | 553.3344        | 277.1709        | 5  | Q      | 10 | 1152.5045       | 576.7559        |
|         | 654.3821        | 327.6947        | 6  | T      | 9  | 1024.4459       | 512.7266        |
|         | 821.3805        | 411.1939        | 7  | S[167] | 8  | 923.3982        | 462.2028        |
|         | 908.4125        | 454.7099        | 8  | S      | 7  | 756.3999        | 378.7036        |
|         | 1022.4554       | 511.7314        | 9  | N      | 6  | 669.3678        | 335.1876        |
|         | 1159.5143       | 580.2608        | 10 | H      | 5  | 555.3249        | 278.1661        |
|         | 1230.5514       | 615.7794        | 11 | A      | 4  | 418.2660        | 209.6366        |
|         | 1343.6355       | 672.3214        | 12 | L      | 3  | 347.2289        | 174.1181        |
|         | 1430.6675       | 715.8374        | 13 | S      | 2  | 234.1448        | 117.5761        |
|         |                 |                 | 14 | K      | 1  | 147.1128        | 74.0600         |

# Annotated spectra from Saleem et. al. 2009

R.LLT<sub>181</sub>PQTSS<sub>167</sub>NHALSK.M/2

0.9512

1e+04

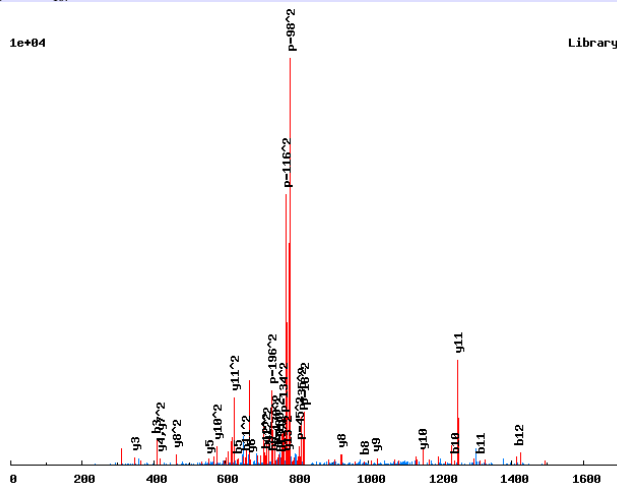

| Library | b <sup>1+</sup> | b <sup>2+</sup> | #  | AA     | #  | y <sup>1+</sup> | y <sup>2+</sup> |
|---------|-----------------|-----------------|----|--------|----|-----------------|-----------------|
|         | 114.0913        | 57.5493         | 1  | L      | 14 |                 |                 |
|         | 227.1754        | 114.0913        | 2  | L      | 13 | 1543.6553       | 772.3313        |
|         | 408.1894        | 204.5983        | 3  | T[181] | 12 | 1430.5713       | 715.7893        |
|         | 505.2422        | 253.1247        | 4  | P      | 11 | 1249.5573       | 625.2823        |
|         | 633.3008        | 317.1540        | 5  | Q      | 10 | 1152.5045       | 576.7559        |
|         | 734.3484        | 367.6779        | 6  | T      | 9  | 1024.4459       | 512.7266        |
|         | 821.3805        | 411.1939        | 7  | S      | 8  | 923.3982        | 462.2028        |
|         | 988.3788        | 494.6931        | 8  | S[167] | 7  | 836.3662        | 418.6867        |
|         | 1102.4218       | 551.7145        | 9  | N      | 6  | 669.3678        | 335.1876        |
|         | 1239.4807       | 620.2440        | 10 | H      | 5  | 555.3249        | 278.1661        |
|         | 1310.5178       | 655.7625        | 11 | A      | 4  | 418.2660        | 209.6366        |
|         | 1423.6018       | 712.3046        | 12 | L      | 3  | 347.2289        | 174.1181        |
|         | 1510.6339       | 755.8206        | 13 | S      | 2  | 234.1448        | 117.5761        |
|         |                 |                 | 14 | K      | 1  | 147.1128        | 74.0600         |

# Annotated spectra from Saleem et. al. 2009

K.LLYPVK<sub>136</sub>S<sub>167</sub>ESST<sub>181</sub>V.-/2

0.9887

1e+04

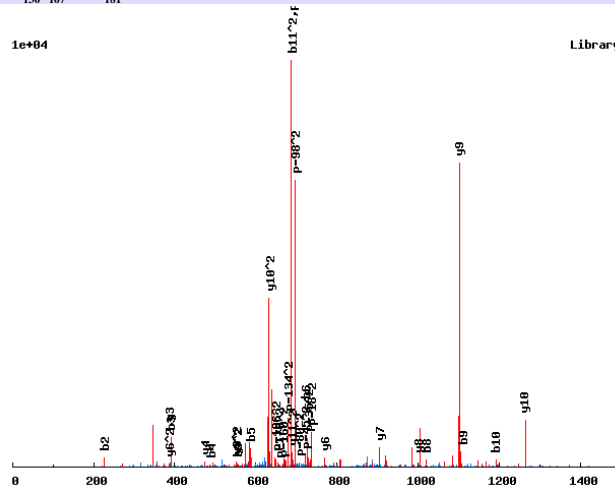

| Library | b <sup>1+</sup> | b <sup>2+</sup> | #  | AA     | #  | y <sup>1+</sup> | y <sup>2+</sup> |
|---------|-----------------|-----------------|----|--------|----|-----------------|-----------------|
|         | 114.0913        | 57.5493         | 1  | L      | 12 |                 |                 |
|         | 227.1754        | 114.0913        | 2  | L      | 11 | 1377.5830       | 689.2951        |
|         | 390.2387        | 195.6230        | 3  | Y      | 10 | 1264.4989       | 632.7531        |
|         | 487.2915        | 244.1494        | 4  | P      | 9  | 1101.4356       | 551.2214        |
|         | 586.3599        | 293.6836        | 5  | V      | 8  | 1004.3828       | 502.6951        |
|         | 722.4691        | 361.7382        | 6  | K[136] | 7  | 905.3144        | 453.1609        |
|         | 889.4674        | 445.2373        | 7  | S[167] | 6  | 769.2053        | 385.1063        |
|         | 1018.5100       | 509.7586        | 8  | E      | 5  | 602.2069        | 301.6071        |
|         | 1105.5420       | 553.2747        | 9  | S      | 4  | 473.1643        | 237.0858        |
|         | 1192.5741       | 596.7907        | 10 | S      | 3  | 386.1323        | 193.5698        |
|         | 1373.5881       | 687.2977        | 11 | T[181] | 2  | 299.1003        | 150.0538        |
|         |                 |                 | 12 | V      | 1  | 118.0862        | 59.5468         |



# Annotated spectra from Saleem et. al. 2009

K.LMAS<sub>167</sub>R<sub>166</sub>ES<sub>167</sub>VELQAK<sub>136</sub>K/2

0.8682

1e+04

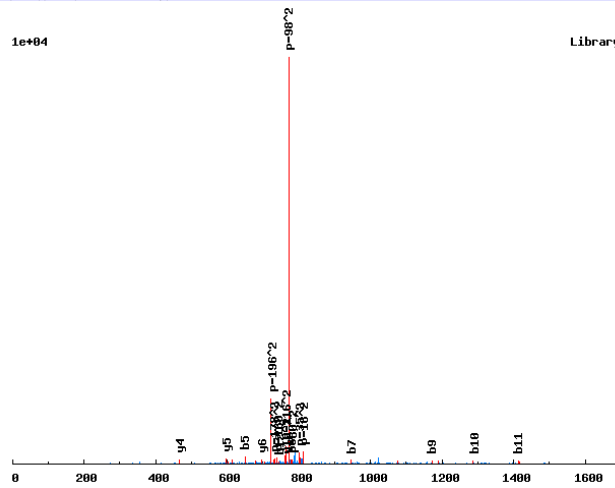

| Library | b <sup>1+</sup> | b <sup>2+</sup> | #  | AA     | #  | y <sup>1+</sup> | y <sup>2+</sup> |
|---------|-----------------|-----------------|----|--------|----|-----------------|-----------------|
|         | 114.0913        | 57.5493         | 1  | L      | 13 |                 |                 |
|         | 245.1318        | 123.0696        | 2  | M      | 12 | 1526.6440       | 763.8257        |
|         | 316.1689        | 158.5881        | 3  | A      | 11 | 1395.6035       | 698.3054        |
|         | 483.1673        | 242.0873        | 4  | S[167] | 10 | 1324.5664       | 662.7869        |
|         | 649.2767        | 325.1420        | 5  | R[166] | 9  | 1157.5681       | 579.2877        |
|         | 778.3193        | 389.6633        | 6  | E      | 8  | 991.4587        | 496.2330        |
|         | 945.3176        | 473.1625        | 7  | S[167] | 7  | 862.4161        | 431.7117        |
|         | 1044.3860       | 522.6967        | 8  | V      | 6  | 695.4177        | 348.2125        |
|         | 1173.4286       | 587.2180        | 9  | E      | 5  | 596.3493        | 298.6783        |
|         | 1286.5127       | 643.7600        | 10 | L      | 4  | 467.3067        | 234.1570        |
|         | 1414.5713       | 707.7893        | 11 | Q      | 3  | 354.2227        | 177.6150        |
|         | 1485.6084       | 743.3078        | 12 | A      | 2  | 226.1641        | 113.5857        |
|         |                 |                 | 13 | K[136] | 1  | 155.1270        | 78.0671         |

# Annotated spectra from Saleem et. al. 2009

K.LNGS<sub>167</sub>SSS<sub>167</sub>INS<sub>167</sub>LQQSTR<sub>166</sub>S/2

0.9988

1e+04

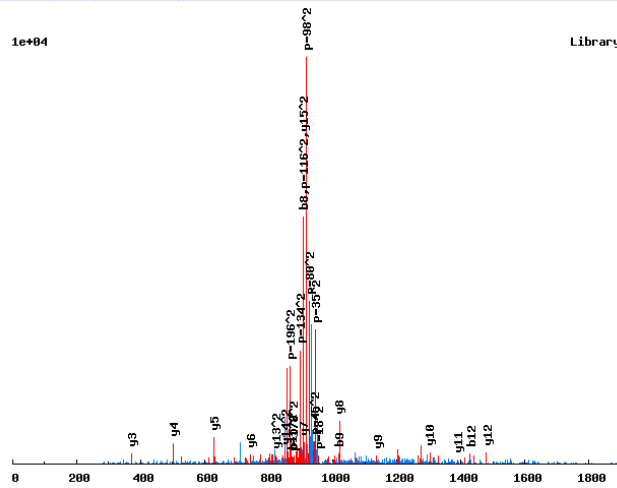

| Library | b <sup>1+</sup> | b <sup>2+</sup> | #  | AA     | #  | y <sup>1+</sup> | y <sup>2+</sup> |
|---------|-----------------|-----------------|----|--------|----|-----------------|-----------------|
|         | 114.0913        | 57.5493         | 1  | L      | 16 |                 |                 |
|         | 228.1343        | 114.5708        | 2  | N      | 15 | 1815.6587       | 908.3330        |
|         | 285.1557        | 143.0815        | 3  | G      | 14 | 1701.6157       | 851.3115        |
|         | 452.1541        | 226.5807        | 4  | S[167] | 13 | 1644.5943       | 822.8008        |
|         | 539.1861        | 270.0967        | 5  | S      | 12 | 1477.5959       | 739.3016        |
|         | 626.2182        | 313.6127        | 6  | S      | 11 | 1390.5639       | 695.7856        |
|         | 793.2165        | 397.1119        | 7  | S[167] | 10 | 1303.5319       | 652.2696        |
|         | 906.3006        | 453.6539        | 8  | I      | 9  | 1136.5335       | 568.7704        |
|         | 1020.3435       | 510.6754        | 9  | N      | 8  | 1023.4494       | 512.2284        |
|         | 1187.3419       | 594.1746        | 10 | S[167] | 7  | 909.4065        | 455.2069        |
|         | 1300.4259       | 650.7166        | 11 | L      | 6  | 742.4081        | 371.7077        |
|         | 1428.4845       | 714.7459        | 12 | Q      | 5  | 629.3241        | 315.1657        |
|         | 1556.5431       | 778.7752        | 13 | Q      | 4  | 501.2655        | 251.1364        |
|         | 1643.5751       | 822.2912        | 14 | S      | 3  | 373.2069        | 187.1071        |
|         | 1744.6228       | 872.8150        | 15 | T      | 2  | 286.1749        | 143.5911        |
|         |                 |                 | 16 | R[166] | 1  | 185.1272        | 93.0672         |

# Annotated spectra from Saleem et. al. 2009

K.LNM<sub>147</sub>IYNET<sub>181</sub>PEK.F/2

0.625

1e+04

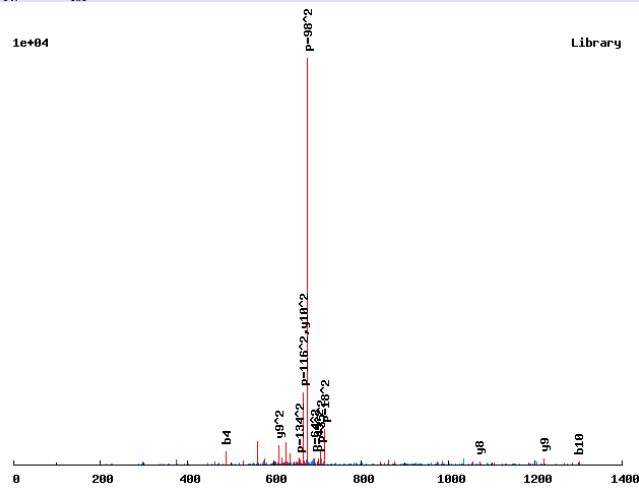

| Library | b <sup>1+</sup> | b <sup>2+</sup> | #  | AA     | #  | y <sup>1+</sup> | y <sup>2+</sup> |
|---------|-----------------|-----------------|----|--------|----|-----------------|-----------------|
|         | 114.0913        | 57.5493         | 1  | L      | 11 |                 |                 |
|         | 228.1343        | 114.5708        | 2  | N      | 10 | 1334.5334       | 667.7703        |
|         | 375.1697        | 188.0885        | 3  | M[147] | 9  | 1220.4905       | 610.7489        |
|         | 488.2537        | 244.6305        | 4  | I      | 8  | 1073.4551       | 537.2312        |
|         | 651.3171        | 326.1622        | 5  | Y      | 7  | 960.3710        | 480.6891        |
|         | 765.3600        | 383.1836        | 6  | N      | 6  | 797.3077        | 399.1575        |
|         | 894.4026        | 447.7049        | 7  | E      | 5  | 683.2648        | 342.1360        |
|         | 1075.4166       | 538.2119        | 8  | T[181] | 4  | 554.2222        | 277.6147        |
|         | 1172.4694       | 586.7383        | 9  | P      | 3  | 373.2081        | 187.1077        |
|         | 1301.5119       | 651.2596        | 10 | E      | 2  | 276.1554        | 138.5813        |
|         |                 |                 | 11 | K      | 1  | 147.1128        | 74.0600         |

# Annotated spectra from Saleem et. al. 2009

RLNS<sub>167</sub>LSNQS<sub>167</sub>TFR<sub>166</sub>S/2

0.9915

1e+04

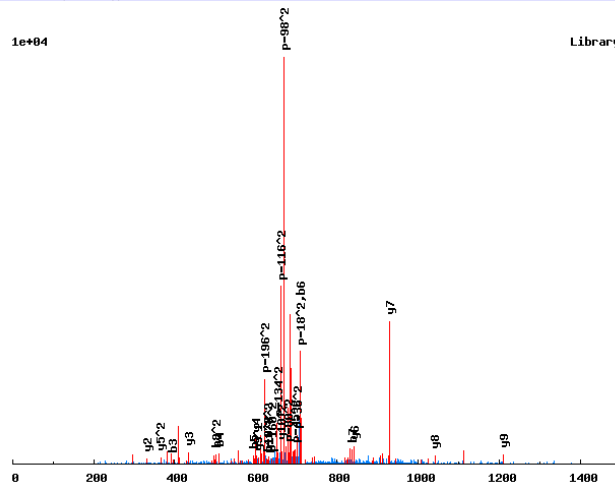

| Library | b <sup>1+</sup> | b <sup>2+</sup> | #  | AA     | #  | y <sup>1+</sup> | y <sup>2+</sup> |
|---------|-----------------|-----------------|----|--------|----|-----------------|-----------------|
|         | 114.0913        | 57.5493         | 1  | L      | 11 |                 |                 |
|         | 228.1343        | 114.5708        | 2  | N      | 10 | 1323.5006       | 662.2539        |
|         | 395.1326        | 198.0700        | 3  | S[167] | 9  | 1209.4576       | 605.2325        |
|         | 508.2167        | 254.6120        | 4  | L      | 8  | 1042.4593       | 521.7333        |
|         | 595.2487        | 298.1280        | 5  | S      | 7  | 929.3752        | 465.1912        |
|         | 709.2917        | 355.1495        | 6  | N      | 6  | 842.3432        | 421.6752        |
|         | 837.3502        | 419.1788        | 7  | Q      | 5  | 728.3003        | 364.6538        |
|         | 1004.3486       | 502.6779        | 8  | S[167] | 4  | 600.2417        | 300.6245        |
|         | 1105.3963       | 553.2018        | 9  | T      | 3  | 433.2433        | 217.1253        |
|         | 1252.4647       | 626.7360        | 10 | F      | 2  | 332.1956        | 166.6015        |
|         |                 |                 | 11 | R[166] | 1  | 185.1272        | 93.0672         |

# Annotated spectra from Saleem et. al. 2009

K.LPDS<sub>167</sub>S<sub>167</sub>DEDTGSEAVPSR.E/2

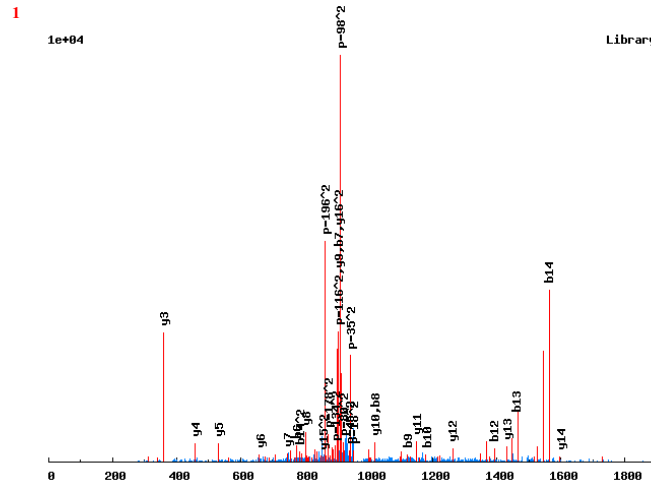

| Library | b <sup>1+</sup> | b <sup>2+</sup> | #  | AA     | #  | y <sup>1+</sup> | y <sup>2+</sup> |
|---------|-----------------|-----------------|----|--------|----|-----------------|-----------------|
|         | 114.0913        | 57.5493         | 1  | L      | 17 |                 |                 |
|         | 211.1441        | 106.0757        | 2  | P      | 16 | 1808.6259       | 904.8166        |
|         | 326.1710        | 163.5892        | 3  | D      | 15 | 1711.5732       | 856.2902        |
|         | 493.1694        | 247.0883        | 4  | S[167] | 14 | 1596.5462       | 798.7767        |
|         | 660.1678        | 330.5875        | 5  | S[167] | 13 | 1429.5479       | 715.2776        |
|         | 775.1947        | 388.1010        | 6  | D      | 12 | 1262.5495       | 631.7784        |
|         | 904.2373        | 452.6223        | 7  | E      | 11 | 1147.5225       | 574.2649        |
|         | 1019.2642       | 510.1358        | 8  | D      | 10 | 1018.4800       | 509.7436        |
|         | 1120.3119       | 560.6596        | 9  | T      | 9  | 903.4530        | 452.2302        |
|         | 1177.3334       | 589.1703        | 10 | G      | 8  | 802.4053        | 401.7063        |
|         | 1264.3654       | 632.6863        | 11 | S      | 7  | 745.3839        | 373.1956        |
|         | 1393.4080       | 697.2076        | 12 | E      | 6  | 658.3519        | 329.6796        |
|         | 1464.4451       | 732.7262        | 13 | A      | 5  | 529.3093        | 265.1583        |
|         | 1563.5135       | 782.2604        | 14 | V      | 4  | 458.2722        | 229.6397        |
|         | 1660.5663       | 830.7868        | 15 | P      | 3  | 359.2037        | 180.1055        |
|         | 1747.5983       | 874.3028        | 16 | S      | 2  | 262.1510        | 131.5791        |
|         |                 |                 | 17 | R      | 1  | 175.1190        | 88.0631         |

Annotated spectra from Saleem et. al. 2009

R.LPETPS<sub>167</sub>DEdGEVVEEEAAQK<sub>136</sub>S<sub>167</sub>PIGK<sub>136</sub>L/3

0.9999

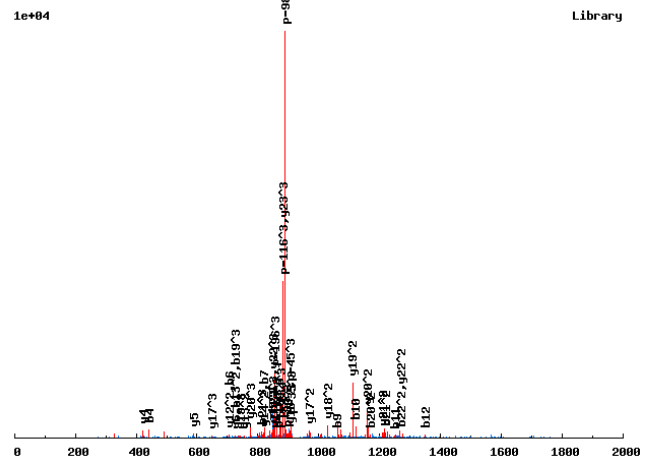

| Library | b <sup>1+</sup> | b <sup>2+</sup> | b <sup>3+</sup> | #  | AA     | #  | y <sup>1+</sup> | y <sup>2+</sup> | y <sup>3+</sup> |
|---------|-----------------|-----------------|-----------------|----|--------|----|-----------------|-----------------|-----------------|
|         | 114.0913        | 57.5493         | 38.7020         | 1  | L      | 24 |                 |                 |                 |
|         | 211.1441        | 106.0757        | 71.0529         | 2  | P      | 23 | 2646.1078       | 1323.5575       | 882.7074        |
|         | 340.1867        | 170.5970        | 114.0671        | 3  | E      | 22 | 2549.0550       | 1275.0311       | 850.3565        |
|         | 441.2344        | 221.1208        | 147.7496        | 4  | T      | 21 | 2420.0124       | 1210.5098       | 807.3423        |
|         | 538.2871        | 269.6472        | 180.1006        | 5  | P      | 20 | 2318.9647       | 1159.9860       | 773.6598        |
|         | 705.2855        | 353.1464        | 235.7667        | 6  | S[167] | 19 | 2221.9120       | 1111.4596       | 741.3088        |
|         | 820.3124        | 410.6599        | 274.1090        | 7  | D      | 18 | 2054.9136       | 1027.9604       | 685.6427        |
|         | 949.3550        | 475.1812        | 317.1232        | 8  | E      | 17 | 1939.8867       | 970.4470        | 647.3004        |
|         | 1064.3820       | 532.6946        | 355.4655        | 9  | D      | 16 | 1810.8441       | 905.9257        | 604.2862        |
|         | 1121.4034       | 561.2054        | 374.4727        | 10 | G      | 15 | 1695.8171       | 848.4122        | 565.9439        |
|         | 1250.4460       | 625.7266        | 417.4869        | 11 | E      | 14 | 1638.7957       | 819.9015        | 546.9367        |
|         | 1349.5144       | 675.2609        | 450.5097        | 12 | V      | 13 | 1509.7531       | 755.3802        | 503.9225        |
|         | 1448.5828       | 724.7951        | 483.5325        | 13 | V      | 12 | 1410.6847       | 705.8460        | 470.8997        |
|         | 1577.6254       | 789.3164        | 526.5467        | 14 | E      | 11 | 1311.6163       | 656.3118        | 437.8769        |
|         | 1706.6680       | 853.8376        | 569.5609        | 15 | E      | 10 | 1182.5737       | 591.7905        | 394.8627        |
|         | 1835.7106       | 918.3589        | 612.5751        | 16 | E      | 9  | 1053.5311       | 527.2692        | 351.8485        |
|         | 1906.7477       | 953.8775        | 636.2541        | 17 | A      | 8  | 924.4885        | 462.7479        | 308.8343        |
|         | 2034.8063       | 1017.9068       | 678.9403        | 18 | Q      | 7  | 853.4514        | 427.2293        | 285.1553        |
|         | 2170.9154       | 1085.9614       | 724.3100        | 19 | K[136] | 6  | 725.3928        | 363.2000        | 242.4691        |
|         | 2337.9138       | 1169.4605       | 779.9761        | 20 | S[167] | 5  | 589.2836        | 295.1455        | 197.0994        |
|         | 2434.9666       | 1217.9869       | 812.3270        | 21 | P      | 4  | 422.2853        | 211.6463        | 141.4333        |
|         | 2548.0506       | 1274.5290       | 850.0217        | 22 | I      | 3  | 325.2325        | 163.1199        | 109.0824        |
|         | 2605.0721       | 1303.0397       | 869.0289        | 23 | G      | 2  | 212.1485        | 106.5779        | 71.3877         |
|         |                 |                 |                 | 24 | K[136] | 1  | 155.1270        | 78.0671         | 52.3805         |

# Annotated spectra from Saleem et. al. 2009

K.LPLTDEQT<sub>181</sub>AEGR<sub>166</sub>K<sub>136</sub>SPAVS<sub>167</sub>E EK<sub>136</sub>K/3

0.9998

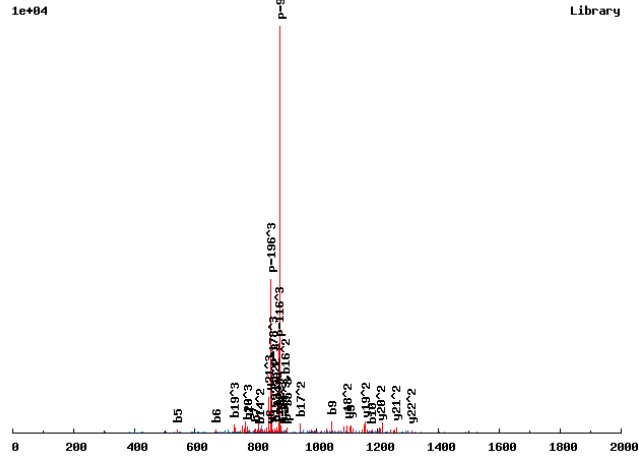

| Library | b <sup>1+</sup> | b <sup>2+</sup> | b <sup>3+</sup> | #  | AA     | #  | y <sup>1+</sup> | y <sup>2+</sup> | y <sup>3+</sup> |
|---------|-----------------|-----------------|-----------------|----|--------|----|-----------------|-----------------|-----------------|
|         | 114.0913        | 57.5493         | 38.7020         | 1  | L      | 23 |                 |                 |                 |
|         | 211.1441        | 106.0757        | 71.0529         | 2  | P      | 22 | 2623.1989       | 1312.1031       | 875.0712        |
|         | 324.2282        | 162.6177        | 108.7476        | 3  | L      | 21 | 2526.1462       | 1263.5767       | 842.7202        |
|         | 425.2758        | 213.1416        | 142.4301        | 4  | T      | 20 | 2413.0621       | 1207.0347       | 805.0256        |
|         | 540.3028        | 270.6550        | 180.7724        | 5  | D      | 19 | 2312.0144       | 1156.5108       | 771.3430        |
|         | 669.3454        | 335.1763        | 223.7866        | 6  | E      | 18 | 2196.9875       | 1098.9974       | 733.0007        |
|         | 797.4040        | 399.2056        | 266.4728        | 7  | Q      | 17 | 2067.9449       | 1034.4761       | 689.9865        |
|         | 978.4180        | 489.7126        | 326.8108        | 8  | T[181] | 16 | 1939.8863       | 970.4468        | 647.3003        |
|         | 1049.4551       | 525.2312        | 350.4899        | 9  | A      | 15 | 1758.8723       | 879.9398        | 586.9623        |
|         | 1178.4977       | 589.7525        | 393.5041        | 10 | E      | 14 | 1687.8352       | 844.4212        | 563.2832        |
|         | 1235.5191       | 618.2632        | 412.5112        | 11 | G      | 13 | 1558.7926       | 779.8999        | 520.2691        |
|         | 1401.6285       | 701.3179        | 467.8810        | 12 | R[166] | 12 | 1501.7711       | 751.3892        | 501.2619        |
|         | 1537.7377       | 769.3725        | 513.2507        | 13 | K[136] | 11 | 1335.6618       | 668.3345        | 445.8921        |
|         | 1624.7697       | 812.8885        | 542.2614        | 14 | S      | 10 | 1199.5526       | 600.2799        | 400.5224        |
|         | 1721.8224       | 861.4149        | 574.6123        | 15 | P      | 9  | 1112.5206       | 556.7639        | 371.5117        |
|         | 1792.8596       | 896.9334        | 598.2914        | 16 | A      | 8  | 1015.4678       | 508.2375        | 339.1608        |
|         | 1891.9280       | 946.4676        | 631.3142        | 17 | V      | 7  | 944.4307        | 472.7190        | 315.4818        |
|         | 2058.9263       | 1029.9668       | 686.9803        | 18 | S[167] | 6  | 845.3623        | 423.1848        | 282.4589        |
|         | 2187.9689       | 1094.4881       | 729.9945        | 19 | E      | 5  | 678.3639        | 339.6856        | 226.7928        |
|         | 2317.0115       | 1159.0094       | 773.0087        | 20 | E      | 4  | 549.3213        | 275.1643        | 183.7786        |
|         | 2453.1207       | 1227.0640       | 818.3784        | 21 | K[136] | 3  | 420.2787        | 210.6430        | 140.7644        |
|         | 2582.1633       | 1291.5853       | 861.3926        | 22 | E      | 2  | 284.1696        | 142.5884        | 95.3947         |
|         |                 |                 |                 | 23 | K[136] | 1  | 155.1270        | 78.0671         | 52.3805         |

# Annotated spectra from Saleem et. al. 2009

RLPS<sub>167</sub>PLAS<sub>167</sub>PNLNR.Q/2

0.9996

1e+04

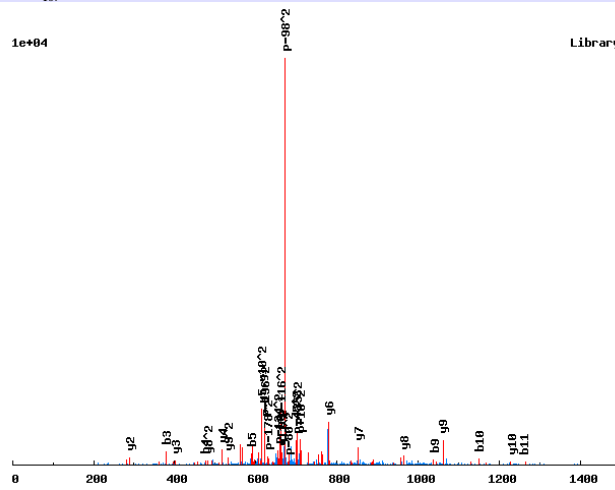

| Library | b <sup>1+</sup> | b <sup>2+</sup> | #  | AA     | #  | y <sup>1+</sup> | y <sup>2+</sup> |
|---------|-----------------|-----------------|----|--------|----|-----------------|-----------------|
|         | 114.0913        | 57.5493         | 1  | L      | 12 |                 |                 |
|         | 211.1441        | 106.0757        | 2  | P      | 11 | 1325.5650       | 663.2862        |
|         | 378.1425        | 189.5749        | 3  | S[167] | 10 | 1228.5123       | 614.7598        |
|         | 475.1952        | 238.1013        | 4  | P      | 9  | 1061.5139       | 531.2606        |
|         | 588.2793        | 294.6433        | 5  | L      | 8  | 964.4612        | 482.7342        |
|         | 659.3164        | 330.1618        | 6  | A      | 7  | 851.3771        | 426.1922        |
|         | 826.3148        | 413.6610        | 7  | S[167] | 6  | 780.3400        | 390.6736        |
|         | 923.3675        | 462.1874        | 8  | P      | 5  | 613.3416        | 307.1745        |
|         | 1037.4104       | 519.2089        | 9  | N      | 4  | 516.2889        | 258.6481        |
|         | 1150.4945       | 575.7509        | 10 | L      | 3  | 402.2459        | 201.6266        |
|         | 1264.5374       | 632.7724        | 11 | N      | 2  | 289.1619        | 145.0846        |
|         |                 |                 | 12 | R      | 1  | 175.1190        | 88.0631         |



# Annotated spectra from Saleem et. al. 2009

K.LQATPAS<sub>167</sub>SEK<sub>136</sub>.M/2

0.9321

1e+04

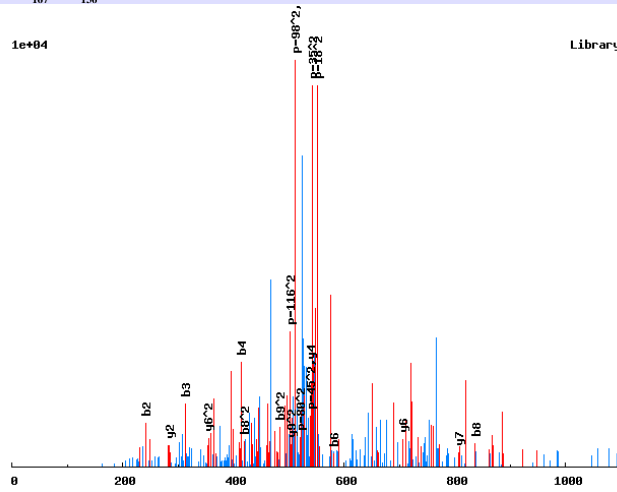

| Library | b <sup>1+</sup> | b <sup>2+</sup> | #  | AA     | #  | y <sup>1+</sup> | y <sup>2+</sup> |
|---------|-----------------|-----------------|----|--------|----|-----------------|-----------------|
|         | 114.0913        | 57.5493         | 1  | L      | 10 |                 |                 |
|         | 242.1499        | 121.5786        | 2  | Q      | 9  | 1006.4332       | 503.7203        |
|         | 313.1870        | 157.0972        | 3  | A      | 8  | 878.3746        | 439.6910        |
|         | 414.2347        | 207.6210        | 4  | T      | 7  | 807.3375        | 404.1724        |
|         | 511.2875        | 256.1474        | 5  | P      | 6  | 706.2899        | 353.6486        |
|         | 582.3246        | 291.6659        | 6  | A      | 5  | 609.2371        | 305.1222        |
|         | 749.3229        | 375.1651        | 7  | S[167] | 4  | 538.2000        | 269.6036        |
|         | 836.3550        | 418.6811        | 8  | S      | 3  | 371.2016        | 186.1044        |
|         | 965.3976        | 483.2024        | 9  | E      | 2  | 284.1696        | 142.5884        |
|         |                 |                 | 10 | K[136] | 1  | 155.1270        | 78.0671         |

# Annotated spectra from Saleem et. al. 2009

K.LQEELHKDAS<sub>167</sub>ESVT<sub>181</sub>PVTK.E/3

0.9895

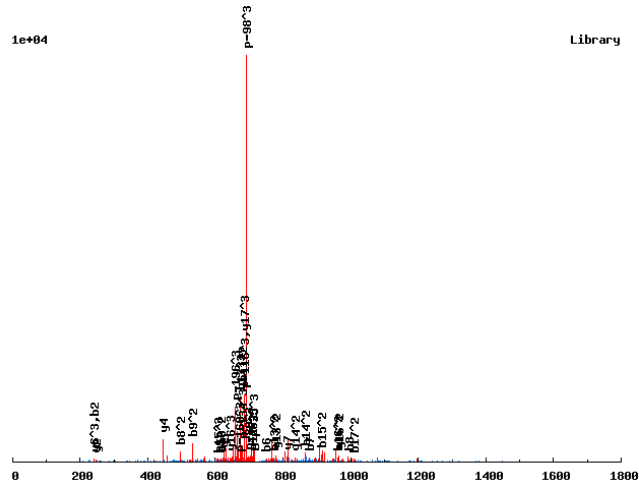

| Library | b <sup>1+</sup> | b <sup>2+</sup>  | b <sup>3+</sup> | #  | AA      | #  | y <sup>1+</sup> | y <sup>2+</sup> | y <sup>3+</sup> |
|---------|-----------------|------------------|-----------------|----|---------|----|-----------------|-----------------|-----------------|
|         | 114.0913        | 57.5493          | 38.7020         | 1  | L       | 18 |                 |                 |                 |
|         | <b>242.1499</b> | 121.5786         | 81.3882         | 2  | Q       | 17 | 2057.8828       | 1029.4450       | <b>686.6325</b> |
|         | 371.1925        | 186.0999         | 124.4024        | 3  | E       | 16 | 1929.8242       | <b>965.4157</b> | <b>643.9463</b> |
|         | 500.2351        | 250.6212         | 167.4166        | 4  | E       | 15 | 1800.7816       | 900.8945        | 600.9321        |
|         | <b>613.3192</b> | 307.1632         | 205.1112        | 5  | L       | 14 | 1671.7390       | <b>836.3732</b> | 557.9179        |
|         | <b>750.3781</b> | 375.6927         | 250.7975        | 6  | H       | 13 | 1558.6550       | <b>779.8311</b> | 520.2232        |
|         | <b>878.4730</b> | 439.7402         | 293.4959        | 7  | K       | 12 | 1421.5961       | <b>711.3017</b> | 474.5369        |
|         | <b>993.5000</b> | <b>497.2536</b>  | 331.8382        | 8  | D       | 11 | 1293.5011       | 647.2542        | 431.8386        |
|         | 1064.5371       | <b>532.7722</b>  | 355.5172        | 9  | A       | 10 | 1178.4742       | 589.7407        | 393.4962        |
|         | 1231.5354       | <b>616.2714</b>  | 411.1833        | 10 | S [167] | 9  | 1107.4371       | 554.2222        | 369.8172        |
|         | 1360.5780       | <b>680.7927</b>  | 454.1975        | 11 | E       | 8  | 940.4387        | 470.7230        | 314.1511        |
|         | 1447.6101       | 724.3087         | 483.2082        | 12 | S       | 7  | <b>811.3961</b> | 406.2017        | 271.1369        |
|         | 1546.6785       | <b>773.8429</b>  | 516.2310        | 13 | V       | 6  | 724.3641        | 362.6857        | <b>242.1262</b> |
|         | 1727.6925       | <b>864.3499</b>  | 576.5690        | 14 | T [181] | 5  | <b>625.2957</b> | 313.1515        | 209.1034        |
|         | 1824.7452       | <b>912.8763</b>  | <b>608.9199</b> | 15 | P       | 4  | <b>444.2817</b> | 222.6445        | 148.7654        |
|         | 1923.8137       | <b>962.4105</b>  | 641.9427        | 16 | V       | 3  | 347.2289        | 174.1181        | 116.4145        |
|         | 2024.8613       | <b>1012.9343</b> | <b>675.6253</b> | 17 | T       | 2  | <b>248.1605</b> | 124.5839        | 83.3917         |
|         |                 |                  |                 | 18 | K       | 1  | 147.1128        | 74.0600         | 49.7091         |



# Annotated spectra from Saleem et. al. 2009

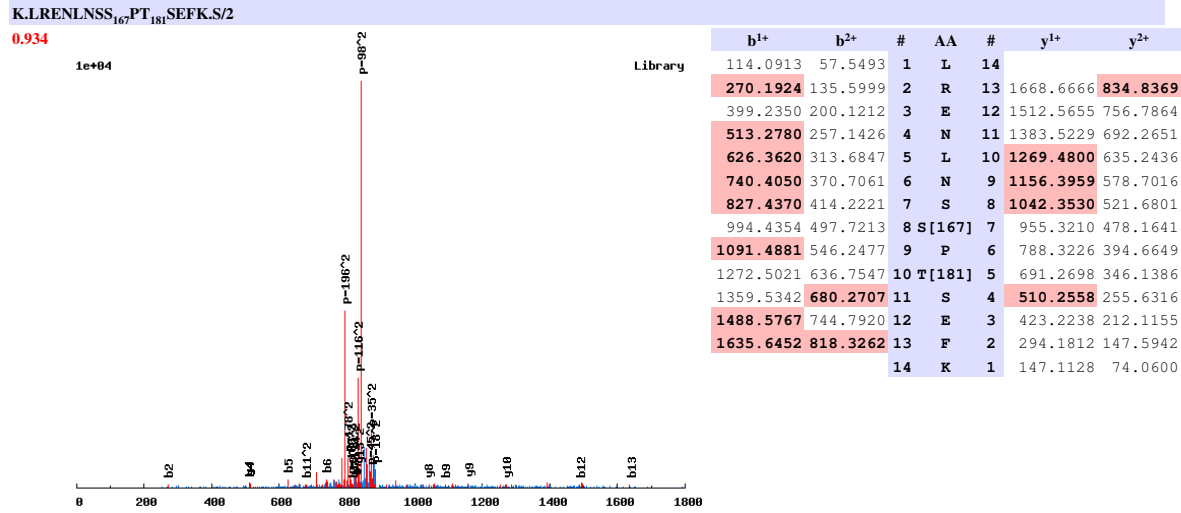

### Annotated spectra from Saleem et. al. 2009

K.LREPD<sub>167</sub>DDDEEEEEVEGSSK.E/3

0.9954

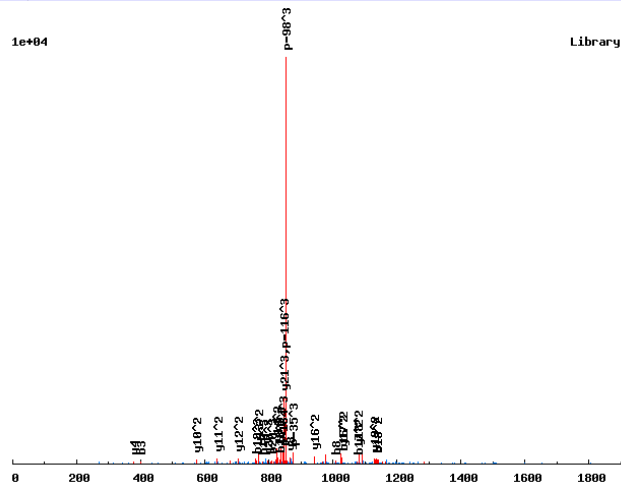

| Library | b <sup>1+</sup> | b <sup>2+</sup> | b <sup>3+</sup> | #  | AA     | #  | y <sup>1+</sup> | y <sup>2+</sup> | y <sup>3+</sup> |
|---------|-----------------|-----------------|-----------------|----|--------|----|-----------------|-----------------|-----------------|
|         | 114.0913        | 57.5493         | 38.7020         | 1  | L      | 22 |                 |                 |                 |
|         | 270.1924        | 135.5999        | 90.7357         | 2  | R      | 21 | 2545.9686       | 1273.4879       | 849.3277        |
|         | 399.2350        | 200.1212        | 133.7499        | 3  | E      | 20 | 2389.8674       | 1195.4374       | 797.2940        |
|         | 496.2878        | 248.6475        | 166.1008        | 4  | P      | 19 | 2260.8249       | 1130.9161       | 754.2798        |
|         | 611.3147        | 306.1610        | 204.4431        | 5  | D      | 18 | 2163.7721       | 1082.3897       | 721.9289        |
|         | 778.3131        | 389.6602        | 260.1092        | 6  | S[167] | 17 | 2048.7452       | 1024.8762       | 683.5866        |
|         | 893.3400        | 447.1737        | 298.4515        | 7  | D      | 16 | 1881.7468       | 941.3770        | 627.9205        |
|         | 1008.3670       | 504.6871        | 336.7938        | 8  | D      | 15 | 1766.7199       | 883.8636        | 589.5781        |
|         | 1123.3939       | 562.2006        | 375.1362        | 9  | D      | 14 | 1651.6929       | 826.3501        | 551.2358        |
|         | 1252.4365       | 626.7219        | 418.1504        | 10 | E      | 13 | 1536.6660       | 768.8366        | 512.8935        |
|         | 1381.4791       | 691.2432        | 461.1646        | 11 | E      | 12 | 1407.6234       | 704.3153        | 469.8793        |
|         | 1510.5217       | 755.7645        | 504.1788        | 12 | E      | 11 | 1278.5808       | 639.7940        | 426.8651        |
|         | 1666.6228       | 833.8150        | 556.2125        | 13 | R      | 10 | 1149.5382       | 575.2727        | 383.8509        |
|         | 1795.6654       | 898.3363        | 599.2267        | 14 | E      | 9  | 993.4371        | 497.2222        | 331.8172        |
|         | 1924.7080       | 962.8576        | 642.2408        | 15 | E      | 8  | 864.3945        | 432.7009        | 288.8030        |
|         | 2053.7506       | 1027.3789       | 685.2550        | 16 | E      | 7  | 735.3519        | 368.1796        | 245.7888        |
|         | 2152.8190       | 1076.9131       | 718.2778        | 17 | V      | 6  | 606.3093        | 303.6583        | 202.7746        |
|         | 2281.8616       | 1141.4344       | 761.2920        | 18 | E      | 5  | 507.2409        | 254.1241        | 169.7518        |
|         | 2338.8830       | 1169.9452       | 780.2992        | 19 | G      | 4  | 378.1983        | 189.6028        | 126.7376        |
|         | 2425.9151       | 1213.4612       | 809.3099        | 20 | S      | 3  | 321.1769        | 161.0921        | 107.7305        |
|         | 2512.9471       | 1256.9772       | 838.3206        | 21 | S      | 2  | 234.1448        | 117.5761        | 78.7198         |
|         |                 |                 |                 | 22 | K      | 1  | 147.1128        | 74.0600         | 49.7091         |

# Annotated spectra from Saleem et. al. 2009

R.LRS<sub>167</sub>SPSASS<sub>167</sub>SSLANR.E/2

0.9998

1e+04

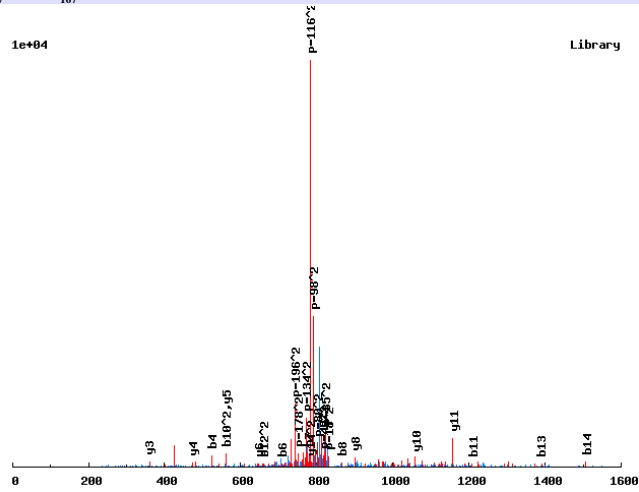

| Library | b <sup>1+</sup> | b <sup>2+</sup> | #  | AA     | #  | y <sup>1+</sup> | y <sup>2+</sup> |
|---------|-----------------|-----------------|----|--------|----|-----------------|-----------------|
|         | 114.0913        | 57.5493         | 1  | L      | 15 |                 |                 |
|         | 270.1924        | 135.5999        | 2  | R      | 14 | 1566.6309       | 783.8191        |
|         | 437.1908        | 219.0990        | 3  | S[167] | 13 | 1410.5298       | 705.7685        |
|         | 524.2228        | 262.6151        | 4  | S      | 12 | 1243.5314       | 622.2694        |
|         | 621.2756        | 311.1414        | 5  | P      | 11 | 1156.4994       | 578.7533        |
|         | 708.3076        | 354.6575        | 6  | S      | 10 | 1059.4466       | 530.2270        |
|         | 779.3447        | 390.1760        | 7  | A      | 9  | 972.4146        | 486.7109        |
|         | 866.3768        | 433.6920        | 8  | S      | 8  | 901.3775        | 451.1924        |
|         | 1033.3751       | 517.1912        | 9  | S[167] | 7  | 814.3455        | 407.6764        |
|         | 1120.4072       | 560.7072        | 10 | S      | 6  | 647.3471        | 324.1772        |
|         | 1207.4392       | 604.2232        | 11 | S      | 5  | 560.3151        | 280.6612        |
|         | 1320.5233       | 660.7653        | 12 | L      | 4  | 473.2831        | 237.1452        |
|         | 1391.5604       | 696.2838        | 13 | A      | 3  | 360.1990        | 180.6031        |
|         | 1505.6033       | 753.3053        | 14 | N      | 2  | 289.1619        | 145.0846        |
|         |                 |                 | 15 | R      | 1  | 175.1190        | 88.0631         |

# Annotated spectra from Saleem et. al. 2009

R.LR<sub>166</sub>S<sub>167</sub>SPSASS<sub>167</sub>S<sub>167</sub>LANR<sub>166</sub>E/2

0.9442

1e+04

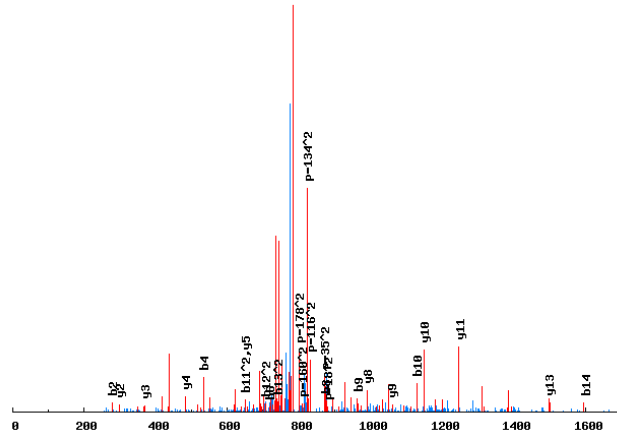

| Library | b <sup>1+</sup> | b <sup>2+</sup> | #  | AA     | #  | y <sup>1+</sup> | y <sup>2+</sup> |
|---------|-----------------|-----------------|----|--------|----|-----------------|-----------------|
|         | 114.0913        | 57.5493         | 1  | L      | 15 |                 |                 |
|         | 280.2007        | 140.6040        | 2  | R[166] | 14 | 1666.6138       | 833.8105        |
|         | 447.1991        | 224.1032        | 3  | S[167] | 13 | 1500.5044       | 750.7558        |
|         | 534.2311        | 267.6192        | 4  | S      | 12 | 1333.5060       | 667.2567        |
|         | 631.2839        | 316.1456        | 5  | P      | 11 | 1246.4740       | 623.7406        |
|         | 718.3159        | 359.6616        | 6  | S      | 10 | 1149.4212       | 575.2143        |
|         | 789.3530        | 395.1801        | 7  | A      | 9  | 1062.3892       | 531.6982        |
|         | 876.3850        | 438.6962        | 8  | S      | 8  | 991.3521        | 496.1797        |
|         | 963.4171        | 482.2122        | 9  | S      | 7  | 904.3201        | 452.6637        |
|         | 1130.4154       | 565.7114        | 10 | S[167] | 6  | 817.2880        | 409.1477        |
|         | 1297.4138       | 649.2105        | 11 | S[167] | 5  | 650.2897        | 325.6485        |
|         | 1410.4979       | 705.7526        | 12 | L      | 4  | 483.2913        | 242.1493        |
|         | 1481.5350       | 741.2711        | 13 | A      | 3  | 370.2073        | 185.6073        |
|         | 1595.5779       | 798.2926        | 14 | N      | 2  | 299.1701        | 150.0887        |
|         |                 |                 | 15 | R[166] | 1  | 185.1272        | 93.0672         |

# Annotated spectra from Saleem et. al. 2009

K.LSATSQTAAS<sub>167</sub>ATPGVAQSREGT<sub>181</sub>PLENRR.S/3

0.9996

1e+04

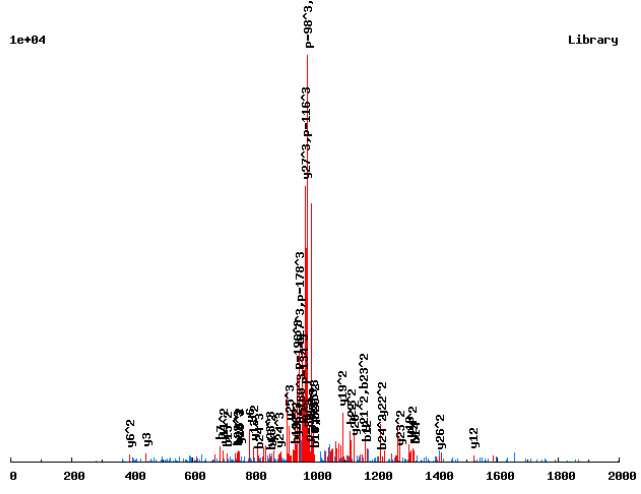

| Library | b <sup>1+</sup> | b <sup>2+</sup> | b <sup>3+</sup> | #  | AA     | #  | y <sup>1+</sup> | y <sup>2+</sup> | y <sup>3+</sup> |
|---------|-----------------|-----------------|-----------------|----|--------|----|-----------------|-----------------|-----------------|
|         | 114.0913        | 57.5493         | 38.7020         | 1  | L      | 28 |                 |                 |                 |
|         | 201.1234        | 101.0653        | 67.7126         | 2  | S      | 27 | 2903.3044       | 1452.1558       | 968.4397        |
|         | 272.1605        | 136.5839        | 91.3917         | 3  | A      | 26 | 2816.2724       | 1408.6398       | 939.4290        |
|         | 373.2082        | 187.1077        | 125.0742        | 4  | T      | 25 | 2745.2353       | 1373.1213       | 915.7499        |
|         | 460.2402        | 230.6237        | 154.0849        | 5  | S      | 24 | 2644.1876       | 1322.5974       | 882.0674        |
|         | 588.2988        | 294.6530        | 196.7711        | 6  | Q      | 23 | 2557.1556       | 1279.0814       | 853.0567        |
|         | 689.3465        | 345.1769        | 230.4537        | 7  | T      | 22 | 2429.0970       | 1215.0521       | 810.3705        |
|         | 760.3836        | 380.6954        | 254.1327        | 8  | A      | 21 | 2328.0493       | 1164.5283       | 776.6880        |
|         | 831.4207        | 416.2140        | 277.8117        | 9  | A      | 20 | 2257.0122       | 1129.0097       | 753.0089        |
|         | 998.4190        | 499.7132        | 333.4779        | 10 | S[167] | 19 | 2185.9751       | 1093.4912       | 729.3299        |
|         | 1069.4561       | 535.2317        | 357.1569        | 11 | A      | 18 | 2018.9767       | 1009.9920       | 673.6638        |
|         | 1170.5038       | 585.7556        | 390.8395        | 12 | T      | 17 | 1947.9396       | 974.4734        | 649.9847        |
|         | 1267.5566       | 634.2819        | 423.1904        | 13 | P      | 16 | 1846.8919       | 923.9496        | 616.3022        |
|         | 1324.5780       | 662.7927        | 442.1975        | 14 | G      | 15 | 1749.8392       | 875.4232        | 583.9512        |
|         | 1423.6465       | 712.3269        | 475.2203        | 15 | V      | 14 | 1692.8177       | 846.9125        | 564.9441        |
|         | 1494.6836       | 747.8454        | 498.8994        | 16 | A      | 13 | 1593.7493       | 797.3783        | 531.9213        |
|         | 1622.7421       | 811.8747        | 541.5856        | 17 | Q      | 12 | 1522.7122       | 761.8597        | 508.2422        |
|         | 1709.7742       | 855.3907        | 570.5962        | 18 | S      | 11 | 1394.6536       | 697.8304        | 465.5561        |
|         | 1865.8753       | 933.4413        | 622.6299        | 19 | R      | 10 | 1307.6216       | 654.3144        | 436.5454        |
|         | 1994.9179       | 997.9626        | 665.6441        | 20 | E      | 9  | 1151.5205       | 576.2639        | 384.5117        |
|         | 2051.9393       | 1026.4733       | 684.6513        | 21 | G      | 8  | 1022.4779       | 511.7426        | 341.4975        |
|         | 2232.9533       | 1116.9803       | 744.9893        | 22 | T[181] | 7  | 965.4564        | 483.2318        | 322.4903        |
|         | 2330.0061       | 1165.5067       | 777.3402        | 23 | P      | 6  | 784.4424        | 392.7248        | 262.1523        |
|         | 2443.0902       | 1222.0487       | 815.0349        | 24 | L      | 5  | 687.3896        | 344.1985        | 229.8014        |
|         | 2572.1328       | 1286.5700       | 858.0491        | 25 | E      | 4  | 574.3056        | 287.6564        | 192.1067        |
|         | 2686.1757       | 1343.5915       | 896.0634        | 26 | N      | 3  | 445.2630        | 223.1351        | 149.0925        |
|         | 2842.2768       | 1421.6420       | 948.0971        | 27 | R      | 2  | 331.2201        | 166.1137        | 111.0782        |
|         |                 |                 |                 | 28 | R      | 1  | 175.1190        | 88.0631         | 59.0445         |



# Annotated spectra from Saleem et. al. 2009

K.LSDVDGGVGS<sub>167</sub>.R.E/2

0.6712

1e+04

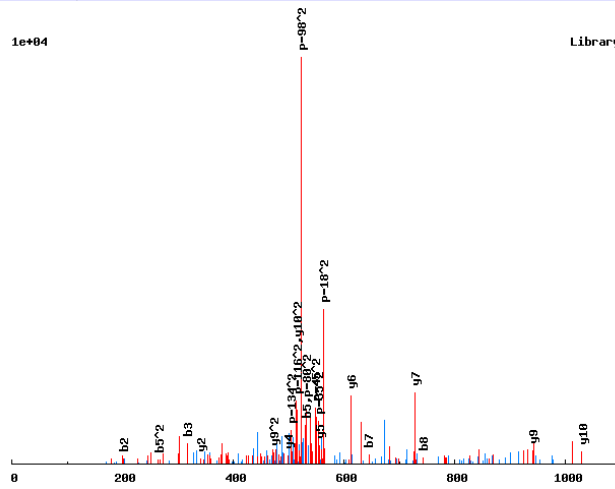

| Library | b <sup>1+</sup> | b <sup>2+</sup> | #  | AA     | #  | y <sup>1+</sup> | y <sup>2+</sup> |
|---------|-----------------|-----------------|----|--------|----|-----------------|-----------------|
|         | 114.0913        | 57.5493         | 1  | L      | 11 |                 |                 |
|         | 201.1234        | 101.0653        | 2  | S      | 10 | 1028.4044       | 514.7059        |
|         | 316.1503        | 158.5788        | 3  | D      | 9  | 941.3724        | 471.1898        |
|         | 415.2187        | 208.1130        | 4  | V      | 8  | 826.3455        | 413.6764        |
|         | 530.2457        | 265.6265        | 5  | D      | 7  | 727.2770        | 364.1422        |
|         | 587.2671        | 294.1372        | 6  | G      | 6  | 612.2501        | 306.6287        |
|         | 644.2886        | 322.6479        | 7  | G      | 5  | 555.2286        | 278.1180        |
|         | 743.3570        | 372.1821        | 8  | V      | 4  | 498.2072        | 249.6072        |
|         | 800.3785        | 400.6929        | 9  | G      | 3  | 399.1388        | 200.0730        |
|         | 967.3768        | 484.1920        | 10 | S[167] | 2  | 342.1173        | 171.5623        |
|         |                 |                 | 11 | R      | 1  | 175.1190        | 88.0631         |

Annotated spectra from Saleem et. al. 2009

K.LSHFS<sub>167</sub>NLEDASFK.S/2

0.8184

1e+04

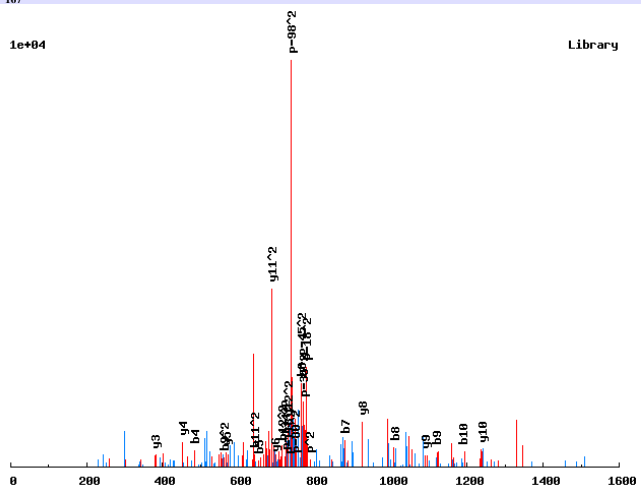

| Library | b <sup>1+</sup> | b <sup>2+</sup> | #  | AA     | #  | y <sup>1+</sup> | y <sup>2+</sup> |
|---------|-----------------|-----------------|----|--------|----|-----------------|-----------------|
|         | 114.0913        | 57.5493         | 1  | L      | 13 |                 |                 |
|         | 201.1234        | 101.0653        | 2  | S      | 12 | 1461.6046       | 731.3059        |
|         | 338.1823        | 169.5948        | 3  | H      | 11 | 1374.5726       | 687.7899        |
|         | 485.2507        | 243.1290        | 4  | F      | 10 | 1237.5136       | 619.2605        |
|         | 652.2491        | 326.6282        | 5  | S[167] | 9  | 1090.4452       | 545.7263        |
|         | 766.2920        | 383.6496        | 6  | N      | 8  | 923.4469        | 462.2271        |
|         | 879.3760        | 440.1917        | 7  | L      | 7  | 809.4039        | 405.2056        |
|         | 1008.4186       | 504.7130        | 8  | E      | 6  | 696.3199        | 348.6636        |
|         | 1123.4456       | 562.2264        | 9  | D      | 5  | 567.2773        | 284.1423        |
|         | 1194.4827       | 597.7450        | 10 | A      | 4  | 452.2504        | 226.6288        |
|         | 1281.5147       | 641.2610        | 11 | S      | 3  | 381.2132        | 191.1103        |
|         | 1428.5831       | 714.7952        | 12 | F      | 2  | 294.1812        | 147.5942        |
|         |                 |                 | 13 | K      | 1  | 147.1128        | 74.0600         |

# Annotated spectra from Saleem et. al. 2009

R.LSIGS<sub>167</sub>APTS<sub>167</sub>R.R/2

0.9685

1e+04

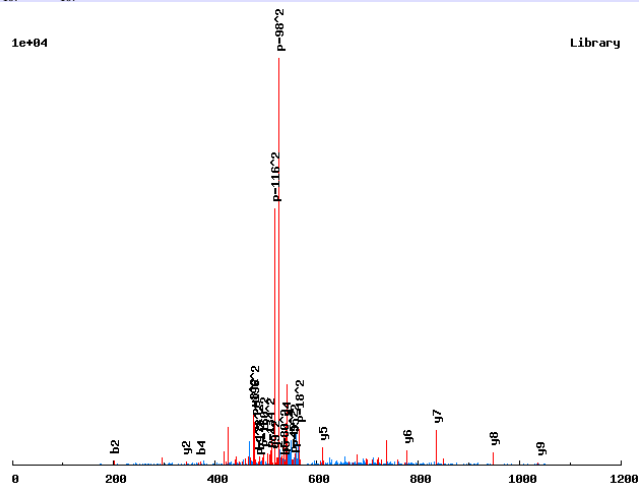

| Library | b <sup>1+</sup> | b <sup>2+</sup> | #  | AA     | #  | y <sup>1+</sup>  | y <sup>2+</sup> |
|---------|-----------------|-----------------|----|--------|----|------------------|-----------------|
|         | 114.0913        | 57.5493         | 1  | L      | 10 |                  |                 |
|         | <b>201.1234</b> | 101.0653        | 2  | S      | 9  | <b>1035.3908</b> | <b>518.1990</b> |
|         | 314.2074        | 157.6074        | 3  | I      | 8  | <b>948.3587</b>  | <b>474.6830</b> |
|         | <b>371.2289</b> | 186.1181        | 4  | G      | 7  | <b>835.2747</b>  | 418.1410        |
|         | <b>538.2273</b> | 269.6173        | 5  | S[167] | 6  | <b>778.2532</b>  | 389.6303        |
|         | 609.2644        | 305.1358        | 6  | A      | 5  | <b>611.2549</b>  | 306.1311        |
|         | 706.3171        | 353.6622        | 7  | P      | 4  | <b>540.2178</b>  | 270.6125        |
|         | 807.3648        | 404.1860        | 8  | T      | 3  | 443.1650         | 222.0861        |
|         | 974.3632        | <b>487.6852</b> | 9  | S[167] | 2  | <b>342.1173</b>  | 171.5623        |
|         |                 |                 | 10 | R      | 1  | 175.1190         | 88.0631         |

Annotated spectra from Saleem et. al. 2009

K.LSIS<sub>167</sub>NAAS<sub>167</sub>QQPT<sub>181</sub>PR.S/2

0.9998

1e+04

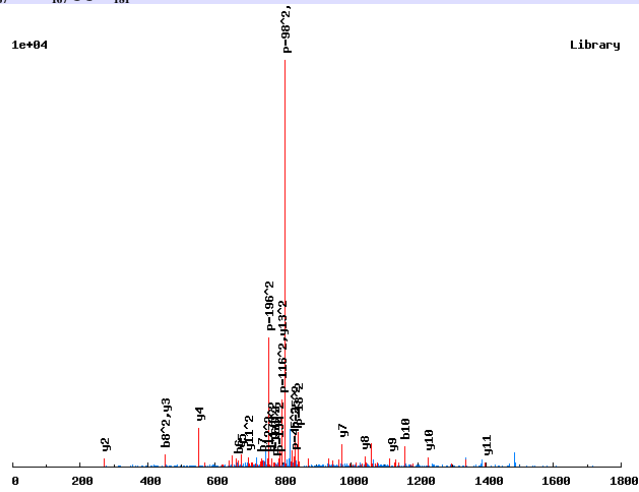

| Library | b <sup>1+</sup> | b <sup>2+</sup> | #  | AA     | #  | y <sup>1+</sup> | y <sup>2+</sup> |
|---------|-----------------|-----------------|----|--------|----|-----------------|-----------------|
|         | 114.0913        | 57.5493         | 1  | L      | 14 |                 |                 |
|         | 201.1234        | 101.0653        | 2  | S      | 13 | 1596.5856       | 798.7964        |
|         | 314.2074        | 157.6074        | 3  | I      | 12 | 1509.5536       | 755.2804        |
|         | 481.2058        | 241.1065        | 4  | S[167] | 11 | 1396.4695       | 698.7384        |
|         | 595.2487        | 298.1280        | 5  | N      | 10 | 1229.4712       | 615.2392        |
|         | 666.2858        | 333.6466        | 6  | A      | 9  | 1115.4282       | 558.2178        |
|         | 737.3229        | 369.1651        | 7  | A      | 8  | 1044.3911       | 522.6992        |
|         | 904.3213        | 452.6643        | 8  | S[167] | 7  | 973.3540        | 487.1806        |
|         | 1032.3799       | 516.6936        | 9  | Q      | 6  | 806.3556        | 403.6815        |
|         | 1160.4385       | 580.7229        | 10 | Q      | 5  | 678.2971        | 339.6522        |
|         | 1257.4912       | 629.2493        | 11 | P      | 4  | 550.2385        | 275.6229        |
|         | 1438.5052       | 719.7563        | 12 | T[181] | 3  | 453.1857        | 227.0965        |
|         | 1535.5580       | 768.2826        | 13 | P      | 2  | 272.1717        | 136.5895        |
|         |                 |                 | 14 | R      | 1  | 175.1190        | 88.0631         |

# Annotated spectra from Saleem et. al. 2009

K.LSISNAAS<sub>167</sub>QQPT<sub>181</sub>PR<sub>166</sub>S/2

0.9936

1e+04

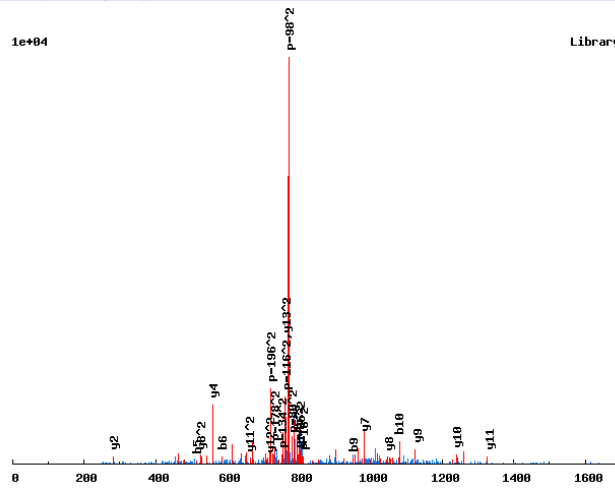

| Library | b <sup>1+</sup> | b <sup>2+</sup> | #  | AA     | #  | y <sup>1+</sup> | y <sup>2+</sup> |
|---------|-----------------|-----------------|----|--------|----|-----------------|-----------------|
|         | 114.0913        | 57.5493         | 1  | L      | 14 |                 |                 |
|         | 201.1234        | 101.0653        | 2  | S      | 13 | 1526.6275       | 763.8174        |
|         | 314.2074        | 157.6074        | 3  | I      | 12 | 1439.5955       | 720.3014        |
|         | 401.2395        | 201.1234        | 4  | S      | 11 | 1326.5115       | 663.7594        |
|         | 515.2824        | 258.1448        | 5  | N      | 10 | 1239.4794       | 620.2434        |
|         | 586.3195        | 293.6634        | 6  | A      | 9  | 1125.4365       | 563.2219        |
|         | 657.3566        | 329.1819        | 7  | A      | 8  | 1054.3994       | 527.7033        |
|         | 824.3550        | 412.6811        | 8  | S[167] | 7  | 983.3623        | 492.1848        |
|         | 952.4136        | 476.7104        | 9  | Q      | 6  | 816.3639        | 408.6856        |
|         | 1080.4721       | 540.7397        | 10 | Q      | 5  | 688.3053        | 344.6563        |
|         | 1177.5249       | 589.2661        | 11 | P      | 4  | 560.2468        | 280.6270        |
|         | 1358.5389       | 679.7731        | 12 | T[181] | 3  | 463.1940        | 232.1006        |
|         | 1455.5917       | 728.2995        | 13 | P      | 2  | 282.1800        | 141.5936        |
|         |                 |                 | 14 | R[166] | 1  | 185.1272        | 93.0672         |

# Annotated spectra from Saleem et. al. 2009

K.LSLTDS<sub>167</sub>TET<sub>181</sub>IENNATVK.H/2

0.9986

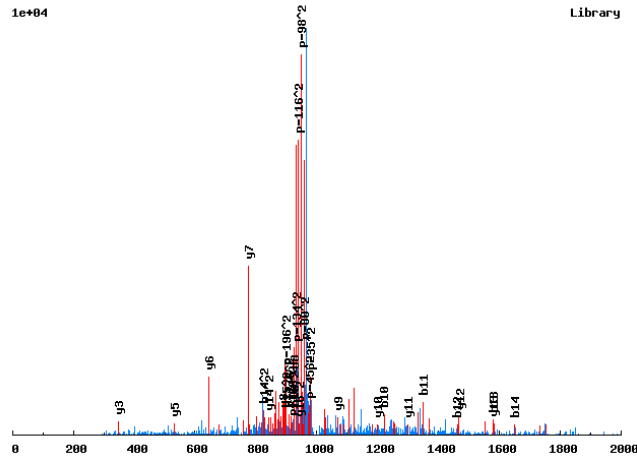

| Library | b <sup>1+</sup> | b <sup>2+</sup> | #  | AA     | #  | y <sup>1+</sup> | y <sup>2+</sup> |
|---------|-----------------|-----------------|----|--------|----|-----------------|-----------------|
|         | 114.0913        | 57.5493         | 1  | L      | 17 |                 |                 |
|         | 201.1234        | 101.0653        | 2  | S      | 16 | 1882.7719       | 941.8896        |
|         | 314.2074        | 157.6074        | 3  | L      | 15 | 1795.7398       | 898.3736        |
|         | 415.2551        | 208.1312        | 4  | T      | 14 | 1682.6558       | 841.8315        |
|         | 530.2821        | 265.6447        | 5  | D      | 13 | 1581.6081       | 791.3077        |
|         | 697.2804        | 349.1438        | 6  | S[167] | 12 | 1466.5812       | 733.7942        |
|         | 798.3281        | 399.6677        | 7  | T      | 11 | 1299.5828       | 650.2950        |
|         | 927.3707        | 464.1890        | 8  | E      | 10 | 1198.5351       | 599.7712        |
|         | 1108.3847       | 554.6960        | 9  | T[181] | 9  | 1069.4925       | 535.2499        |
|         | 1221.4688       | 611.2380        | 10 | I      | 8  | 888.4785        | 444.7429        |
|         | 1350.5113       | 675.7593        | 11 | E      | 7  | 775.3945        | 388.2009        |
|         | 1464.5543       | 732.7808        | 12 | N      | 6  | 646.3519        | 323.6796        |
|         | 1578.5972       | 789.8022        | 13 | N      | 5  | 532.3089        | 266.6581        |
|         | 1649.6343       | 825.3208        | 14 | A      | 4  | 418.2660        | 209.6366        |
|         | 1750.6820       | 875.8446        | 15 | T      | 3  | 347.2289        | 174.1181        |
|         | 1849.7504       | 925.3788        | 16 | V      | 2  | 246.1812        | 123.5942        |
|         |                 |                 | 17 | K      | 1  | 147.1128        | 74.0600         |

# Annotated spectra from Saleem et. al. 2009

R.LSPNS<sub>167</sub>PT<sub>181</sub>PPLK.S/2

0.8941

1e+04

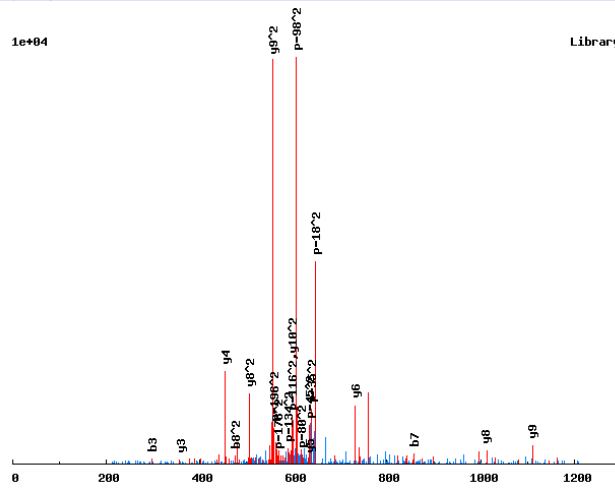

| Library | b <sup>1+</sup> | b <sup>2+</sup> | #  | AA     | #  | y <sup>1+</sup> | y <sup>2+</sup> |
|---------|-----------------|-----------------|----|--------|----|-----------------|-----------------|
|         | 114.0913        | 57.5493         | 1  | L      | 11 |                 |                 |
|         | 201.1234        | 101.0653        | 2  | S      | 10 | 1197.4952       | 599.2513        |
|         | 298.1761        | 149.5917        | 3  | P      | 9  | 1110.4632       | 555.7352        |
|         | 412.2191        | 206.6132        | 4  | N      | 8  | 1013.4104       | 507.2089        |
|         | 579.2174        | 290.1124        | 5  | S[167] | 7  | 899.3675        | 450.1874        |
|         | 676.2702        | 338.6387        | 6  | P      | 6  | 732.3692        | 366.6882        |
|         | 857.2842        | 429.1457        | 7  | T[181] | 5  | 635.3164        | 318.1618        |
|         | 954.3370        | 477.6721        | 8  | P      | 4  | 454.3024        | 227.6548        |
|         | 1051.3897       | 526.1985        | 9  | P      | 3  | 357.2496        | 179.1284        |
|         | 1164.4738       | 582.7405        | 10 | L      | 2  | 260.1969        | 130.6021        |
|         |                 |                 | 11 | K      | 1  | 147.1128        | 74.0600         |

Annotated spectra from Saleem et. al. 2009

R.LSS<sub>167</sub>DST<sub>181</sub>SPIKYEADVSAGGK.I/3

0.9941

1e+04

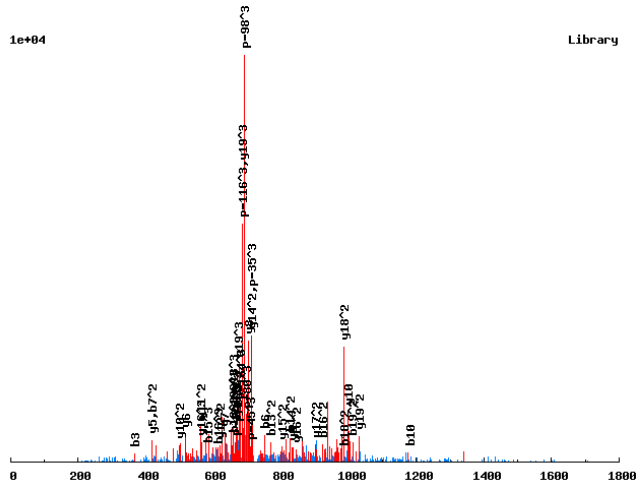

| Library | b <sup>1+</sup> | b <sup>2+</sup> | b <sup>3+</sup> | #  | AA     | #  | y <sup>1+</sup> | y <sup>2+</sup> | y <sup>3+</sup> |
|---------|-----------------|-----------------|-----------------|----|--------|----|-----------------|-----------------|-----------------|
|         | 114.0913        | 57.5493         | 38.7020         | 1  | L      | 20 |                 |                 |                 |
|         | 201.1234        | 101.0653        | 67.7126         | 2  | S      | 19 | 2058.8304       | 1029.9189       | 686.9483        |
|         | 368.1217        | 184.5645        | 123.3788        | 3  | S[167] | 18 | 1971.7984       | 986.4028        | 657.9377        |
|         | 483.1487        | 242.0780        | 161.7211        | 4  | D      | 17 | 1804.8000       | 902.9037        | 602.2715        |
|         | 570.1807        | 285.5940        | 190.7318        | 5  | S      | 16 | 1689.7731       | 845.3902        | 563.9292        |
|         | 751.1947        | 376.1010        | 251.0698        | 6  | T[181] | 15 | 1602.7411       | 801.8742        | 534.9185        |
|         | 838.2267        | 419.6170        | 280.0804        | 7  | S      | 14 | 1421.7270       | 711.3672        | 474.5805        |
|         | 935.2795        | 468.1434        | 312.4314        | 8  | P      | 13 | 1334.6950       | 667.8511        | 445.5699        |
|         | 1048.3636       | 524.6854        | 350.1260        | 9  | I      | 12 | 1237.6423       | 619.3248        | 413.2189        |
|         | 1176.4585       | 588.7329        | 392.8244        | 10 | K      | 11 | 1124.5582       | 562.7827        | 375.5243        |
|         | 1339.5219       | 670.2646        | 447.1788        | 11 | Y      | 10 | 996.4632        | 498.7353        | 332.8259        |
|         | 1468.5644       | 734.7859        | 490.1930        | 12 | E      | 9  | 833.3999        | 417.2036        | 278.4715        |
|         | 1539.6016       | 770.3044        | 513.8720        | 13 | A      | 8  | 704.3573        | 352.6823        | 235.4573        |
|         | 1654.6285       | 827.8179        | 552.2144        | 14 | D      | 7  | 633.3202        | 317.1637        | 211.7783        |
|         | 1753.6969       | 877.3521        | 585.2372        | 15 | V      | 6  | 518.2933        | 259.6503        | 173.4359        |
|         | 1840.7289       | 920.8681        | 614.2478        | 16 | S      | 5  | 419.2249        | 210.1161        | 140.4131        |
|         | 1911.7660       | 956.3867        | 637.9269        | 17 | A      | 4  | 332.1928        | 166.6001        | 111.4025        |
|         | 1968.7875       | 984.8974        | 656.9340        | 18 | G      | 3  | 261.1557        | 131.0815        | 87.7234         |
|         | 2025.8090       | 1013.4081       | 675.9412        | 19 | G      | 2  | 204.1343        | 102.5708        | 68.7163         |
|         |                 |                 |                 | 20 | K      | 1  | 147.1128        | 74.0600         | 49.7091         |



# Annotated spectra from Saleem et. al. 2009

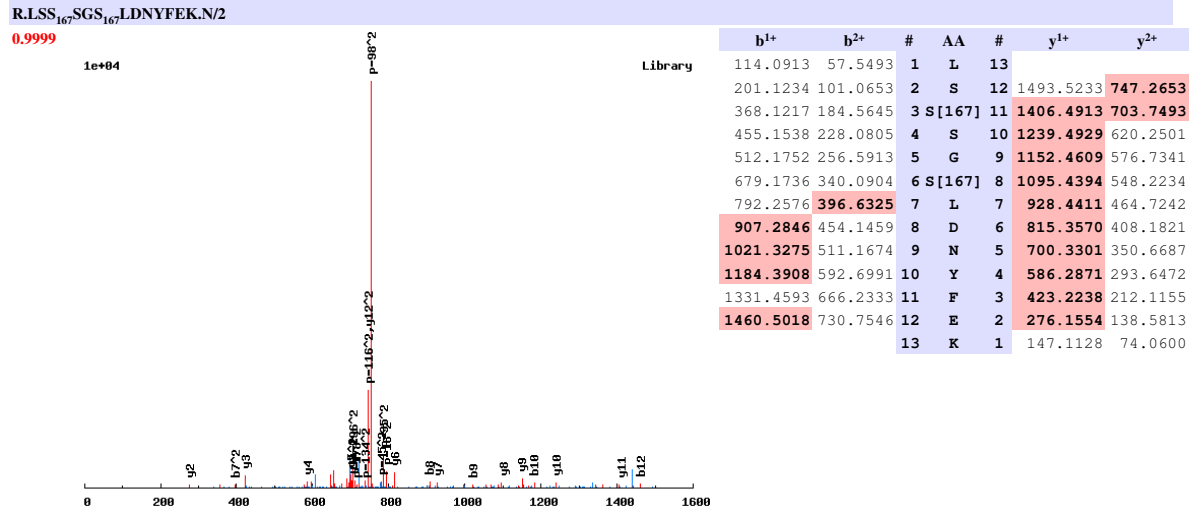

# Annotated spectra from Saleem et. al. 2009

K.LSS<sub>167</sub>SMPNS<sub>167</sub>PK<sub>136</sub>K<sub>136</sub>PVDSLTK<sub>136</sub>A/3

0.9417

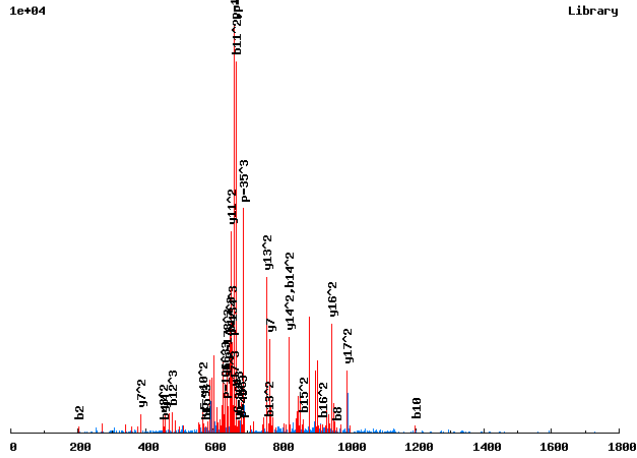

| Library | b <sup>1+</sup>  | b <sup>2+</sup> | b <sup>3+</sup> | #  | AA     | #  | y <sup>1+</sup> | y <sup>2+</sup> | y <sup>3+</sup> |
|---------|------------------|-----------------|-----------------|----|--------|----|-----------------|-----------------|-----------------|
|         | 114.0913         | 57.5493         | 38.7020         | 1  | L      | 18 |                 |                 |                 |
|         | <b>201.1234</b>  | 101.0653        | 67.7126         | 2  | S      | 17 | 1986.9069       | <b>993.9571</b> | <b>662.9738</b> |
|         | 368.1217         | 184.5645        | 123.3788        | 3  | S[167] | 16 | 1899.8749       | <b>950.4411</b> | <b>633.9631</b> |
|         | <b>455.1538</b>  | 228.0805        | 152.3894        | 4  | S      | 15 | 1732.8765       | 866.9419        | 578.2970        |
|         | 586.1943         | 293.6008        | 196.0696        | 5  | M      | 14 | 1645.8445       | <b>823.4259</b> | 549.2864        |
|         | <b>683.2470</b>  | 342.1271        | 228.4205        | 6  | P      | 13 | 1514.8040       | <b>757.9056</b> | 505.6062        |
|         | 797.2899         | 399.1486        | 266.4348        | 7  | N      | 12 | 1417.7512       | 709.3793        | 473.2553        |
|         | <b>964.2883</b>  | 482.6478        | 322.1010        | 8  | S[167] | 11 | 1303.7083       | <b>652.3578</b> | 435.2410        |
|         | 1061.3411        | 531.1742        | 354.4519        | 9  | P      | 10 | 1136.7100       | <b>568.8586</b> | 379.5748        |
|         | <b>1197.4502</b> | 599.2288        | 399.8216        | 10 | K[136] | 9  | 1039.6572       | 520.3322        | 347.2239        |
|         | 1333.5594        | <b>667.2833</b> | 445.1913        | 11 | K[136] | 8  | 903.5480        | <b>452.2777</b> | 301.8542        |
|         | 1430.6121        | 715.8097        | <b>477.5422</b> | 12 | P      | 7  | <b>767.4389</b> | <b>384.2231</b> | 256.4845        |
|         | 1529.6805        | <b>765.3439</b> | 510.5650        | 13 | V      | 6  | <b>670.3861</b> | 335.6967        | 224.1336        |
|         | 1644.7075        | <b>822.8574</b> | 548.9073        | 14 | D      | 5  | <b>571.3177</b> | 286.1625        | 191.1108        |
|         | 1731.7395        | <b>866.3734</b> | <b>577.9180</b> | 15 | S      | 4  | <b>456.2908</b> | 228.6490        | 152.7684        |
|         | 1844.8236        | <b>922.9154</b> | 615.6127        | 16 | L      | 3  | 369.2587        | 185.1330        | 123.7578        |
|         | 1945.8713        | 973.4393        | <b>649.2953</b> | 17 | T      | 2  | 256.1747        | 128.5910        | 86.0631         |
|         |                  |                 |                 | 18 | K[136] | 1  | 155.1270        | 78.0671         | 52.3805         |

# Annotated spectra from Saleem et. al. 2009

K.LLATSEPT<sub>181</sub>S<sub>167</sub>R<sub>166</sub>R/2

0.9821

1e+04

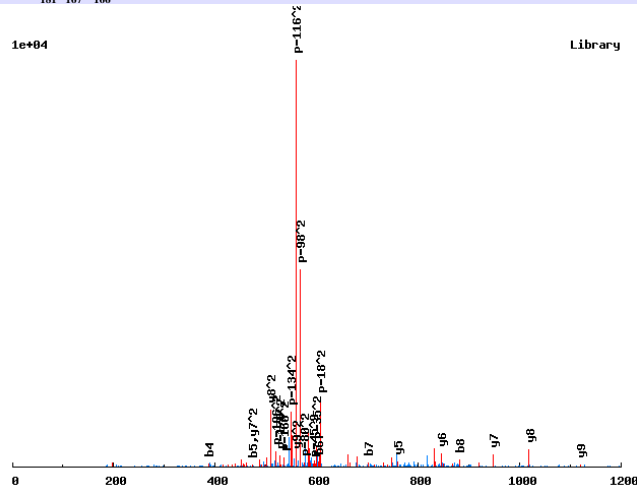

| Library | b <sup>1+</sup> | b <sup>2+</sup> | #  | AA     | #  | y <sup>1+</sup> | y <sup>2+</sup> |
|---------|-----------------|-----------------|----|--------|----|-----------------|-----------------|
|         | 114.0913        | 57.5493         | 1  | L      | 10 |                 |                 |
|         | 215.1390        | 108.0731        | 2  | T      | 9  | 1119.3994       | 560.2034        |
|         | 286.1761        | 143.5917        | 3  | A      | 8  | 1018.3518       | 509.6795        |
|         | 387.2238        | 194.1155        | 4  | T      | 7  | 947.3147        | 474.1610        |
|         | 474.2558        | 237.6316        | 5  | S      | 6  | 846.2670        | 423.6371        |
|         | 603.2984        | 302.1529        | 6  | E      | 5  | 759.2349        | 380.1211        |
|         | 700.3512        | 350.6792        | 7  | P      | 4  | 630.1924        | 315.5998        |
|         | 881.3652        | 441.1862        | 8  | T[181] | 3  | 533.1396        | 267.0734        |
|         | 1048.3636       | 524.6854        | 9  | S[167] | 2  | 352.1256        | 176.5664        |
|         |                 |                 | 10 | R[166] | 1  | 185.1272        | 93.0672         |

Annotated spectra from Saleem et. al. 2009

K.LTDHSGEYFTSNS<sub>167</sub>T<sub>181</sub>SSLNHHSSR.D/4

0.7247

1e+04

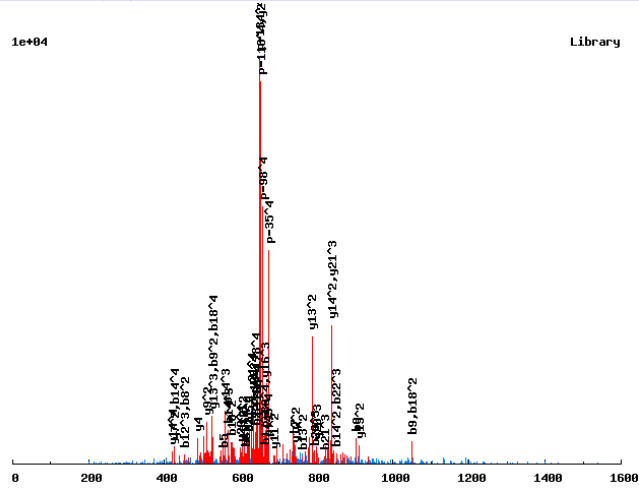

| Library | b <sup>1+</sup> | b <sup>2+</sup> | b <sup>3+</sup> | b <sup>4+</sup> | #  | AA     | #  | y <sup>1+</sup> | y <sup>2+</sup> | y <sup>3+</sup> | y <sup>4+</sup> |
|---------|-----------------|-----------------|-----------------|-----------------|----|--------|----|-----------------|-----------------|-----------------|-----------------|
|         | 114.0913        | 57.5493         | 38.7020         | 29.2783         | 1  | L      | 23 |                 |                 |                 |                 |
|         | 215.1390        | 108.0731        | 72.3845         | 54.5402         | 2  | T      | 22 | 2610.9882       | 1305.9978       | 871.0009        | 653.5025        |
|         | 330.1660        | 165.5866        | 110.7268        | 83.2969         | 3  | D      | 21 | 2509.9406       | 1255.4739       | 837.3184        | 628.2406        |
|         | 467.2249        | 234.1161        | 156.4131        | 117.5617        | 4  | H      | 20 | 2394.9136       | 1197.9605       | 798.9761        | 599.4839        |
|         | 554.2569        | 277.6321        | 185.4238        | 139.3197        | 5  | S      | 19 | 2257.8547       | 1129.4310       | 753.2898        | 565.2191        |
|         | 611.2784        | 306.1428        | 204.4310        | 153.5751        | 6  | G      | 18 | 2170.8227       | 1085.9150       | 724.2791        | 543.4611        |
|         | 740.3210        | 370.6641        | 247.4452        | 185.8357        | 7  | E      | 17 | 2113.8012       | 1057.4043       | 705.2719        | 529.2058        |
|         | 903.3843        | 452.1958        | 301.7996        | 226.6015        | 8  | Y      | 16 | 1984.7586       | 992.8830        | 662.2577        | 496.9451        |
|         | 1050.4527       | 525.7300        | 350.8224        | 263.3686        | 9  | F      | 15 | 1821.6953       | 911.3513        | 607.9033        | 456.1793        |
|         | 1151.5004       | 576.2538        | 384.5050        | 288.6306        | 10 | T      | 14 | 1674.6269       | 837.8171        | 558.8805        | 419.4122        |
|         | 1238.5324       | 619.7698        | 413.5157        | 310.3886        | 11 | S      | 13 | 1573.5792       | 787.2932        | 525.1979        | 394.1503        |
|         | 1352.5753       | 676.7913        | 451.5300        | 338.8993        | 12 | N      | 12 | 1486.5472       | 743.7772        | 496.1872        | 372.3923        |
|         | 1519.5737       | 760.2905        | 507.1961        | 380.6489        | 13 | S[167] | 11 | 1372.5043       | 686.7558        | 458.1729        | 343.8815        |
|         | 1700.5877       | 850.7975        | 567.5341        | 425.9024        | 14 | T[181] | 10 | 1205.5059       | 603.2566        | 402.5068        | 302.1319        |
|         | 1787.6197       | 894.3135        | 596.5448        | 447.6604        | 15 | S      | 9  | 1024.4919       | 512.7496        | 342.1688        | 256.8784        |
|         | 1874.6518       | 937.8295        | 625.5554        | 469.4184        | 16 | S      | 8  | 937.4599        | 469.2336        | 313.1581        | 235.1204        |
|         | 1987.7358       | 994.3716        | 663.2501        | 497.6894        | 17 | L      | 7  | 850.4278        | 425.7176        | 284.1475        | 213.3624        |
|         | 2101.7788       | 1051.3930       | 701.2644        | 526.2001        | 18 | N      | 6  | 737.3438        | 369.1755        | 246.4528        | 185.0914        |
|         | 2238.8377       | 1119.9225       | 746.9507        | 560.4649        | 19 | H      | 5  | 623.3008        | 312.1541        | 208.4385        | 156.5807        |
|         | 2375.8966       | 1188.4519       | 792.6370        | 594.7296        | 20 | H      | 4  | 486.2419        | 243.6246        | 162.7522        | 122.3159        |
|         | 2462.9286       | 1231.9679       | 821.6477        | 616.4876        | 21 | S      | 3  | 349.1830        | 175.0951        | 117.0659        | 88.0512         |
|         | 2549.9606       | 1275.4840       | 850.6584        | 638.2456        | 22 | S      | 2  | 262.1510        | 131.5791        | 88.0552         | 66.2932         |
|         |                 |                 |                 |                 | 23 | R      | 1  | 175.1190        | 88.0631         | 59.0445         | 44.5352         |

# Annotated spectra from Saleem et. al. 2009

RLTS<sub>167</sub>LNVVAGSDLR.R/2

0.9932

1e+04

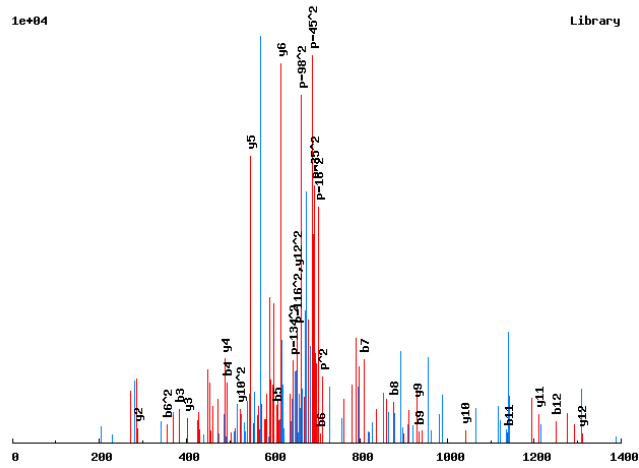

| Library | b <sup>1+</sup> | b <sup>2+</sup> | #  | AA     | #  | y <sup>1+</sup> | y <sup>2+</sup> |
|---------|-----------------|-----------------|----|--------|----|-----------------|-----------------|
|         | 114.0913        | 57.5493         | 1  | L      | 13 |                 |                 |
|         | 215.1390        | 108.0731        | 2  | T      | 12 | 1311.6304       | 656.3188        |
|         | 382.1374        | 191.5723        | 3  | S[167] | 11 | 1210.5827       | 605.7950        |
|         | 495.2214        | 248.1144        | 4  | L      | 10 | 1043.5844       | 522.2958        |
|         | 609.2644        | 305.1358        | 5  | N      | 9  | 930.5003        | 465.7538        |
|         | 708.3328        | 354.6700        | 6  | V      | 8  | 816.4574        | 408.7323        |
|         | 807.4012        | 404.2042        | 7  | V      | 7  | 717.3890        | 359.1981        |
|         | 878.4383        | 439.7228        | 8  | A      | 6  | 618.3206        | 309.6639        |
|         | 935.4598        | 468.2335        | 9  | G      | 5  | 547.2834        | 274.1454        |
|         | 1022.4918       | 511.7495        | 10 | S      | 4  | 490.2620        | 245.6346        |
|         | 1137.5187       | 569.2630        | 11 | D      | 3  | 403.2299        | 202.1186        |
|         | 1250.6028       | 625.8050        | 12 | L      | 2  | 288.2030        | 144.6051        |
|         |                 |                 | 13 | R      | 1  | 175.1190        | 88.0631         |

# Annotated spectra from Saleem et. al. 2009

K.LVEKRES<sub>167</sub>TEGVLDGSK.K/3

0.9976

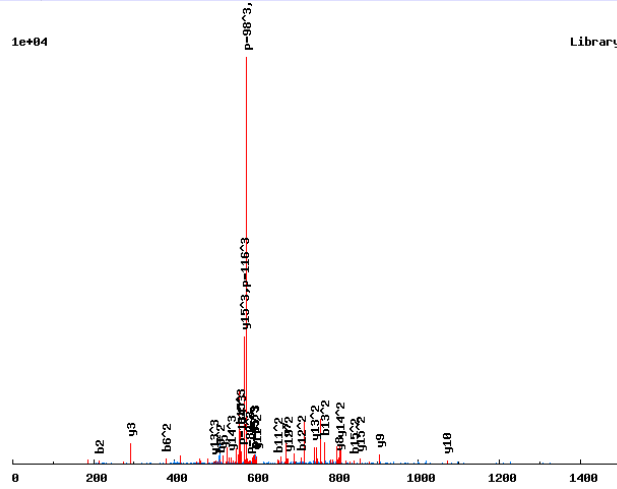

| Library | b <sup>1+</sup> | b <sup>2+</sup> | b <sup>3+</sup> | #  | AA     | #  | y <sup>1+</sup>  | y <sup>2+</sup> | y <sup>3+</sup> |
|---------|-----------------|-----------------|-----------------|----|--------|----|------------------|-----------------|-----------------|
|         | 114.0913        | 57.5493         | 38.7020         | 1  | L      | 16 |                  |                 |                 |
|         | <b>213.1598</b> | 107.0835        | 71.7248         | 2  | V      | 15 | 1713.8055        | <b>857.4064</b> | <b>571.9400</b> |
|         | 342.2023        | 171.6048        | 114.7390        | 3  | E      | 14 | 1614.7370        | <b>807.8722</b> | <b>538.9172</b> |
|         | 470.2973        | 235.6523        | 157.4373        | 4  | K      | 13 | 1485.6945        | <b>743.3509</b> | <b>495.9030</b> |
|         | 626.3984        | 313.7028        | 209.4710        | 5  | R      | 12 | 1357.5995        | <b>679.3034</b> | 453.2047        |
|         | 755.4410        | <b>378.2241</b> | 252.4852        | 6  | E      | 11 | 1201.4984        | <b>601.2528</b> | 401.1710        |
|         | 922.4394        | 461.7233        | 308.1513        | 7  | S[167] | 10 | <b>1072.4558</b> | 536.7315        | 358.1568        |
|         | 1023.4870       | <b>512.2472</b> | 341.8339        | 8  | T      | 9  | <b>905.4574</b>  | 453.2324        | 302.4907        |
|         | 1152.5296       | <b>576.7685</b> | 384.8481        | 9  | E      | 8  | <b>804.4098</b>  | 402.7085        | 268.8081        |
|         | 1209.5511       | 605.2792        | 403.8552        | 10 | G      | 7  | <b>675.3672</b>  | 338.1872        | 225.7939        |
|         | 1308.6195       | <b>654.8134</b> | 436.8780        | 11 | V      | 6  | 618.3457         | 309.6765        | 206.7868        |
|         | 1421.7036       | <b>711.3554</b> | 474.5727        | 12 | L      | 5  | <b>519.2773</b>  | 260.1423        | 173.7640        |
|         | 1536.7305       | <b>768.8689</b> | 512.9150        | 13 | D      | 4  | 406.1932         | 203.6003        | 136.0693        |
|         | 1593.7520       | 797.3796        | 531.9222        | 14 | G      | 3  | <b>291.1663</b>  | 146.0868        | 97.7269         |
|         | 1680.7840       | <b>840.8956</b> | <b>560.9329</b> | 15 | S      | 2  | 234.1448         | 117.5761        | 78.7198         |
|         |                 |                 |                 | 16 | K      | 1  | 147.1128         | 74.0600         | 49.7091         |

# Annotated spectra from Saleem et. al. 2009

RLVPGS<sub>167</sub>DSSS<sub>167</sub>RPK.K/2

0.9902

1e+04

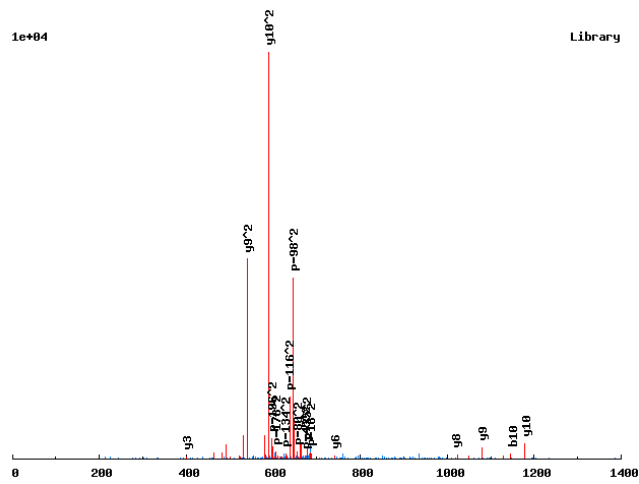

| Library | b <sup>1+</sup> | b <sup>2+</sup> | #  | AA     | #  | y <sup>1+</sup> | y <sup>2+</sup> |
|---------|-----------------|-----------------|----|--------|----|-----------------|-----------------|
|         | 114.0913        | 57.5493         | 1  | L      | 12 |                 |                 |
|         | 213.1598        | 107.0835        | 2  | V      | 11 | 1276.4970       | 638.7522        |
|         | 310.2125        | 155.6099        | 3  | P      | 10 | 1177.4286       | 589.2179        |
|         | 367.2340        | 184.1206        | 4  | G      | 9  | 1080.3759       | 540.6916        |
|         | 534.2323        | 267.6198        | 5  | S[167] | 8  | 1023.3544       | 512.1808        |
|         | 649.2593        | 325.1333        | 6  | D      | 7  | 856.3560        | 428.6817        |
|         | 736.2913        | 368.6493        | 7  | S      | 6  | 741.3291        | 371.1682        |
|         | 823.3233        | 412.1653        | 8  | S      | 5  | 654.2971        | 327.6522        |
|         | 990.3217        | 495.6645        | 9  | S[167] | 4  | 567.2650        | 284.1362        |
|         | 1146.4228       | 573.7150        | 10 | R      | 3  | 400.2667        | 200.6370        |
|         | 1243.4756       | 622.2414        | 11 | P      | 2  | 244.1656        | 122.5864        |
|         |                 |                 | 12 | K      | 1  | 147.1128        | 74.0600         |

# Annotated spectra from Saleem et. al. 2009

RLVSSSTS<sub>167</sub>S<sub>167</sub>FPK.F/2

0.6878

1e+04

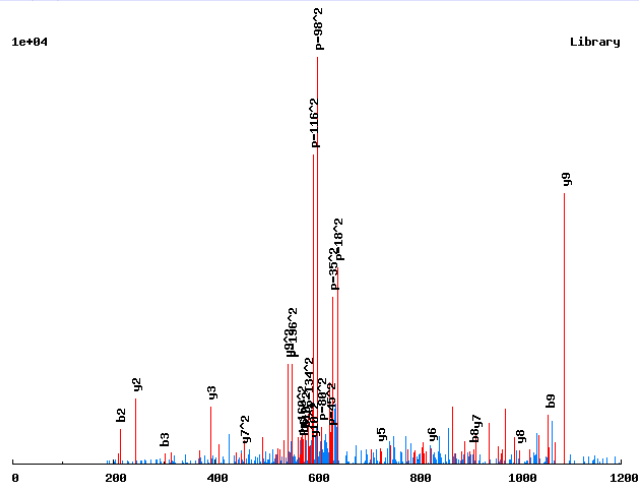

| Library | b <sup>1+</sup> | b <sup>2+</sup> | #  | AA     | #  | y <sup>1+</sup> | y <sup>2+</sup> |
|---------|-----------------|-----------------|----|--------|----|-----------------|-----------------|
|         | 114.0913        | 57.5493         | 1  | L      | 11 |                 |                 |
|         | 213.1598        | 107.0835        | 2  | V      | 10 | 1186.4429       | 593.7251        |
|         | 300.1918        | 150.5995        | 3  | S      | 9  | 1087.3745       | 544.1909        |
|         | 387.2238        | 194.1155        | 4  | S      | 8  | 1000.3424       | 500.6749        |
|         | 474.2558        | 237.6316        | 5  | S      | 7  | 913.3104        | 457.1588        |
|         | 575.3035        | 288.1554        | 6  | T      | 6  | 826.2784        | 413.6428        |
|         | 742.3019        | 371.6546        | 7  | S[167] | 5  | 725.2307        | 363.1190        |
|         | 909.3002        | 455.1538        | 8  | S[167] | 4  | 558.2323        | 279.6198        |
|         | 1056.3687       | 528.6880        | 9  | F      | 3  | 391.2340        | 196.1206        |
|         | 1153.4214       | 577.2143        | 10 | P      | 2  | 244.1656        | 122.5864        |
|         |                 |                 | 11 | K      | 1  | 147.1128        | 74.0600         |



# Annotated spectra from Saleem et. al. 2009

R.LYAADGR<sub>166</sub>PHS<sub>167</sub>PLR<sub>166</sub>A/2

0.9975

1e+04

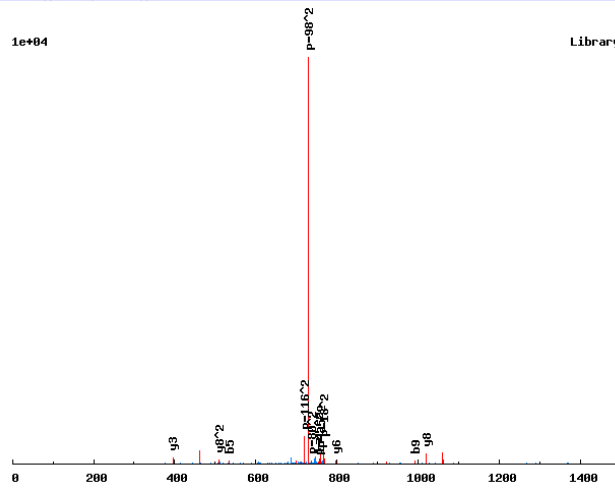

| Library | b <sup>1+</sup> | b <sup>2+</sup> | #  | AA     | #  | y <sup>1+</sup> | y <sup>2+</sup> |
|---------|-----------------|-----------------|----|--------|----|-----------------|-----------------|
|         | 114.0913        | 57.5493         | 1  | L      | 13 |                 |                 |
|         | 277.1547        | 139.0810        | 2  | Y      | 12 | 1439.6694       | 720.3383        |
|         | 348.1918        | 174.5995        | 3  | A      | 11 | 1276.6061       | 638.8067        |
|         | 419.2289        | 210.1181        | 4  | A      | 10 | 1205.5690       | 603.2881        |
|         | 534.2558        | 267.6316        | 5  | D      | 9  | 1134.5318       | 567.7696        |
|         | 591.2773        | 296.1423        | 6  | G      | 8  | 1019.5049       | 510.2561        |
|         | 757.3867        | 379.1970        | 7  | R[166] | 7  | 962.4834        | 481.7454        |
|         | 854.4394        | 427.7234        | 8  | P      | 6  | 796.3741        | 398.6907        |
|         | 991.4983        | 496.2528        | 9  | H      | 5  | 699.3213        | 350.1643        |
|         | 1158.4967       | 579.7520        | 10 | S[167] | 4  | 562.2624        | 281.6348        |
|         | 1255.5495       | 628.2784        | 11 | P      | 3  | 395.2640        | 198.1357        |
|         | 1368.6335       | 684.8204        | 12 | L      | 2  | 298.2113        | 149.6093        |
|         |                 |                 | 13 | R[166] | 1  | 185.1272        | 93.0672         |

# Annotated spectra from Saleem et. al. 2009

K.LYASS<sub>167</sub>FS<sub>167</sub>SNHGPSSGSFEEEHK.G/3

0.9917

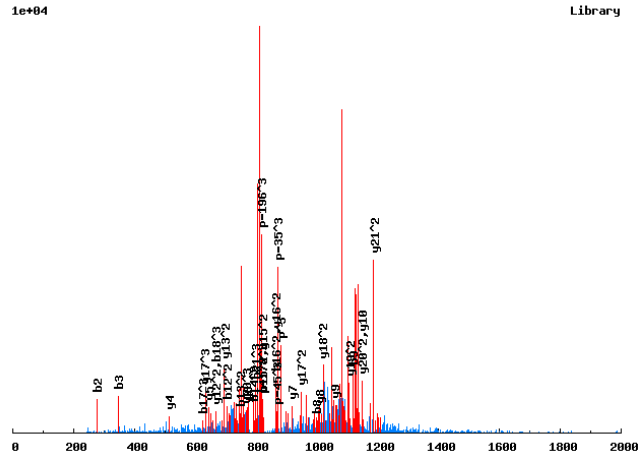

| Library | b <sup>1+</sup> | b <sup>2+</sup> | b <sup>3+</sup> | #  | AA     | #  | y <sup>1+</sup> | y <sup>2+</sup> | y <sup>3+</sup> |
|---------|-----------------|-----------------|-----------------|----|--------|----|-----------------|-----------------|-----------------|
|         | 114.0913        | 57.5493         | 38.7020         | 1  | L      | 23 |                 |                 |                 |
|         | 277.1547        | 139.0810        | 93.0564         | 2  | Y      | 22 | 2531.9388       | 1266.4730       | 844.6511        |
|         | 348.1918        | 174.5995        | 116.7354        | 3  | A      | 21 | 2368.8755       | 1184.9414       | 790.2967        |
|         | 435.2238        | 218.1155        | 145.7461        | 4  | S      | 20 | 2297.8384       | 1149.4228       | 766.6176        |
|         | 602.2222        | 301.6147        | 201.4122        | 5  | S[167] | 19 | 2210.8063       | 1105.9068       | 737.6070        |
|         | 749.2906        | 375.1489        | 250.4350        | 6  | F      | 18 | 2043.8080       | 1022.4076       | 681.9408        |
|         | 916.2889        | 458.6481        | 306.1012        | 7  | S[167] | 17 | 1896.7396       | 948.8734        | 632.9180        |
|         | 1003.3210       | 502.1641        | 335.1118        | 8  | S      | 16 | 1729.7412       | 865.3742        | 577.2519        |
|         | 1117.3639       | 559.1856        | 373.1262        | 9  | N      | 15 | 1642.7092       | 821.8582        | 548.2412        |
|         | 1254.4228       | 627.7150        | 418.8125        | 10 | H      | 14 | 1528.6662       | 764.8368        | 510.2269        |
|         | 1311.4443       | 656.2258        | 437.8196        | 11 | G      | 13 | 1391.6073       | 696.3073        | 464.5406        |
|         | 1408.4970       | 704.7522        | 470.1705        | 12 | P      | 12 | 1334.5859       | 667.7966        | 445.5335        |
|         | 1495.5291       | 748.2682        | 499.1812        | 13 | S      | 11 | 1237.5331       | 619.2702        | 413.1826        |
|         | 1582.5611       | 791.7842        | 528.1919        | 14 | S      | 10 | 1150.5011       | 575.7542        | 384.1719        |
|         | 1639.5826       | 820.2949        | 547.1990        | 15 | G      | 9  | 1063.4691       | 532.2382        | 355.1612        |
|         | 1726.6146       | 863.8109        | 576.2097        | 16 | S      | 8  | 1006.4476       | 503.7274        | 336.1541        |
|         | 1873.6830       | 937.3451        | 625.2325        | 17 | F      | 7  | 919.4156        | 460.2114        | 307.1434        |
|         | 2002.7256       | 1001.8664       | 668.2467        | 18 | E      | 6  | 772.3472        | 386.6772        | 258.1206        |
|         | 2131.7682       | 1066.3877       | 711.2609        | 19 | E      | 5  | 643.3046        | 322.1559        | 215.1064        |
|         | 2260.8108       | 1130.9090       | 754.2751        | 20 | E      | 4  | 514.2620        | 257.6346        | 172.0922        |
|         | 2397.8697       | 1199.4385       | 799.9614        | 21 | H      | 3  | 385.2194        | 193.1133        | 129.0780        |
|         | 2498.9174       | 1249.9623       | 833.6440        | 22 | T      | 2  | 248.1605        | 124.5839        | 83.3917         |
|         |                 |                 |                 | 23 | K      | 1  | 147.1128        | 74.0600         | 49.7091         |

# Annotated spectra from Saleem et. al. 2009

K.LYASS<sub>167</sub>FSSNHGPSS<sub>167</sub>GS<sub>167</sub>FEEHTK<sub>136</sub>G/4

0.7418

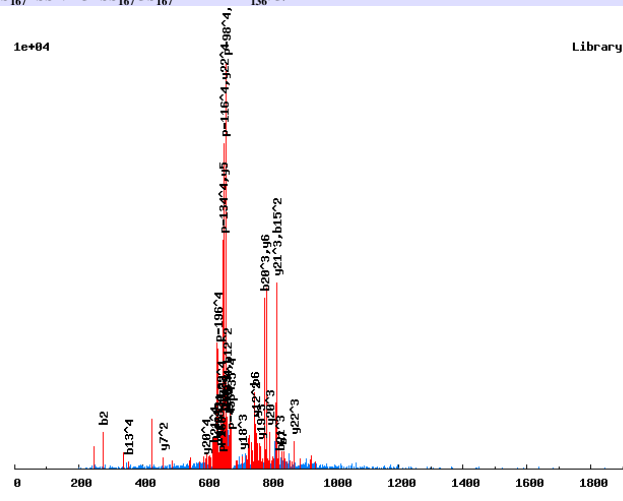

| Library | b <sup>1+</sup> | b <sup>2+</sup> | b <sup>3+</sup> | b <sup>4+</sup> | #  | AA     | #  | y <sup>1+</sup> | y <sup>2+</sup> | y <sup>3+</sup> | y <sup>4+</sup> |
|---------|-----------------|-----------------|-----------------|-----------------|----|--------|----|-----------------|-----------------|-----------------|-----------------|
|         | 114.0913        | 57.5493         | 38.7020         | 29.2783         | 1  | L      | 23 |                 |                 |                 |                 |
|         | <b>277.1547</b> | 139.0810        | 93.0564         | 70.0441         | 2  | Y      | 22 | 2619.9193       | 1310.4633       | <b>873.9780</b> | <b>655.7353</b> |
|         | 348.1918        | 174.5995        | 116.7354        | 87.8034         | 3  | A      | 21 | 2456.8560       | 1228.9316       | <b>819.6235</b> | 614.9695        |
|         | 435.2238        | 218.1155        | 145.7461        | 109.5614        | 4  | S      | 20 | 2385.8189       | 1193.4131       | <b>795.9445</b> | <b>597.2102</b> |
|         | 602.2222        | 301.6147        | 201.4122        | 151.3110        | 5  | S[167] | 19 | 2298.7869       | 1149.8971       | <b>766.9338</b> | 575.4522        |
|         | <b>749.2906</b> | 375.1489        | 250.4350        | 188.0781        | 6  | F      | 18 | 2131.7885       | 1066.3979       | <b>711.2677</b> | 533.7026        |
|         | <b>836.3226</b> | 418.6649        | 279.4457        | 209.8361        | 7  | S      | 17 | 1984.7201       | 992.8637        | <b>662.2449</b> | 496.9355        |
|         | 923.3546        | 462.1810        | 308.4564        | 231.5941        | 8  | S      | 16 | 1897.6881       | 949.3477        | <b>633.2342</b> | 475.1775        |
|         | 1037.3976       | 519.2024        | 346.4707        | 260.1049        | 9  | N      | 15 | 1810.6560       | 905.8317        | 604.2235        | 453.4195        |
|         | 1174.4565       | 587.7319        | 392.1570        | 294.3696        | 10 | H      | 14 | 1696.6131       | 848.8102        | 566.2092        | 424.9087        |
|         | 1231.4779       | 616.2426        | 411.1642        | 308.6249        | 11 | G      | 13 | 1559.5542       | 780.2807        | 520.5229        | 390.6440        |
|         | 1328.5307       | <b>664.7690</b> | 443.5151        | 332.8881        | 12 | P      | 12 | 1502.5327       | <b>751.7700</b> | 501.5158        | 376.3886        |
|         | 1415.5627       | 708.2850        | 472.5258        | <b>354.6461</b> | 13 | S      | 11 | 1405.4800       | 703.2436        | 469.1648        | 352.1255        |
|         | 1582.5611       | 791.7842        | 528.1919        | 396.3957        | 14 | S[167] | 10 | 1318.4480       | <b>659.7276</b> | 440.1542        | 330.3674        |
|         | 1639.5826       | <b>820.2949</b> | 547.1990        | 410.6511        | 15 | G      | 9  | 1151.4496       | 576.2284        | 384.4880        | 288.6179        |
|         | 1806.5809       | 903.7941        | 602.8652        | 452.4007        | 16 | S[167] | 8  | 1094.4281       | 547.7177        | 365.4809        | 274.3625        |
|         | 1953.6493       | 977.3283        | <b>651.8880</b> | 489.1678        | 17 | F      | 7  | 927.4298        | <b>464.2185</b> | 309.8148        | 232.6129        |
|         | 2082.6919       | 1041.8496       | 694.9022        | 521.4284        | 18 | E      | 6  | <b>780.3614</b> | 390.6843        | 260.7920        | 195.8458        |
|         | 2211.7345       | 1106.3709       | 737.9164        | 553.6891        | 19 | E      | 5  | <b>651.3188</b> | 326.1630        | 217.7778        | 163.5852        |
|         | 2340.7771       | 1170.8922       | <b>780.9306</b> | 585.9497        | 20 | E      | 4  | 522.2762        | 261.6417        | 174.7636        | 131.3245        |
|         | 2477.8360       | 1239.4216       | <b>826.6169</b> | <b>620.2145</b> | 21 | H      | 3  | 393.2336        | 197.1204        | 131.7494        | 99.0639         |
|         | 2578.8837       | 1289.9455       | 860.2994        | <b>645.4764</b> | 22 | T      | 2  | 256.1747        | 128.5910        | 86.0631         | 64.7991         |
|         |                 |                 |                 |                 | 23 | K[136] | 1  | 155.1270        | 78.0671         | 52.3805         | 39.5372         |

# Annotated spectra from Saleem et. al. 2009

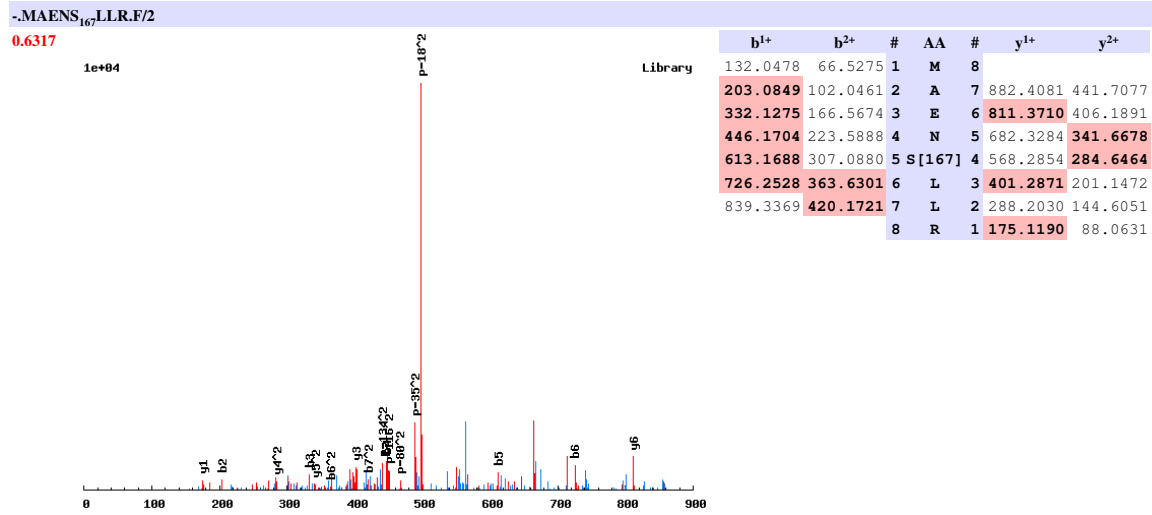

# Annotated spectra from Saleem et. al. 2009

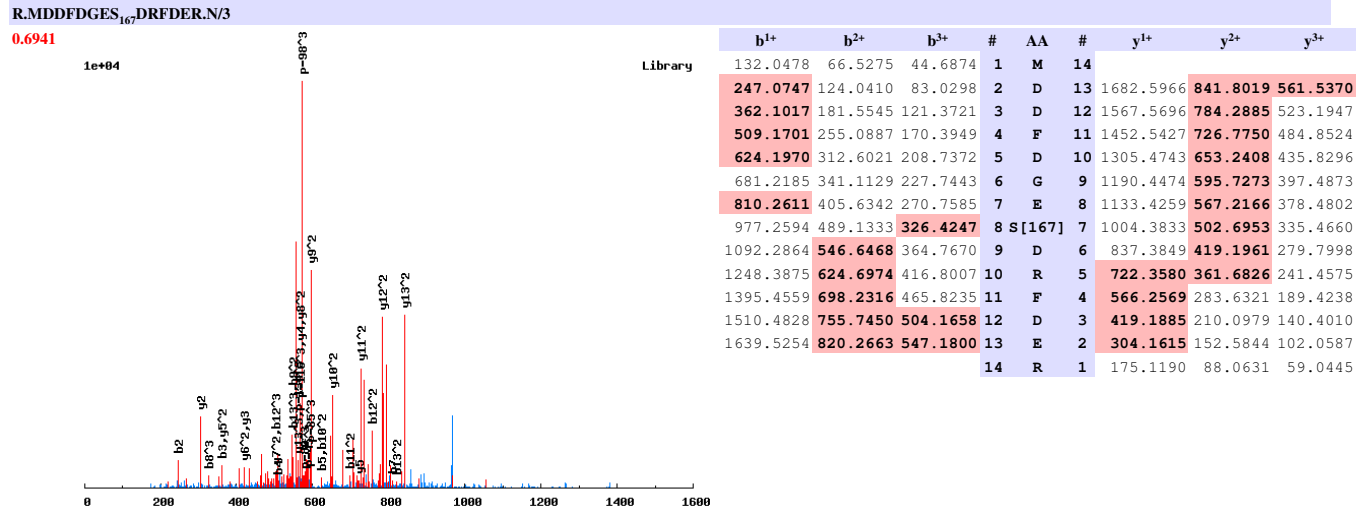

# Annotated spectra from Saleem et. al. 2009

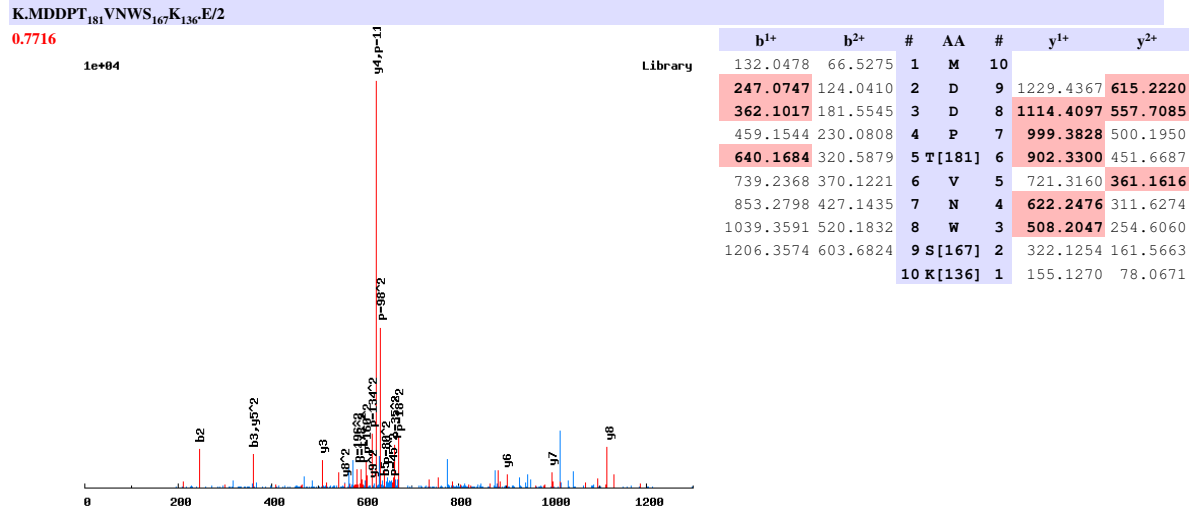

Annotated spectra from Saleem et. al. 2009

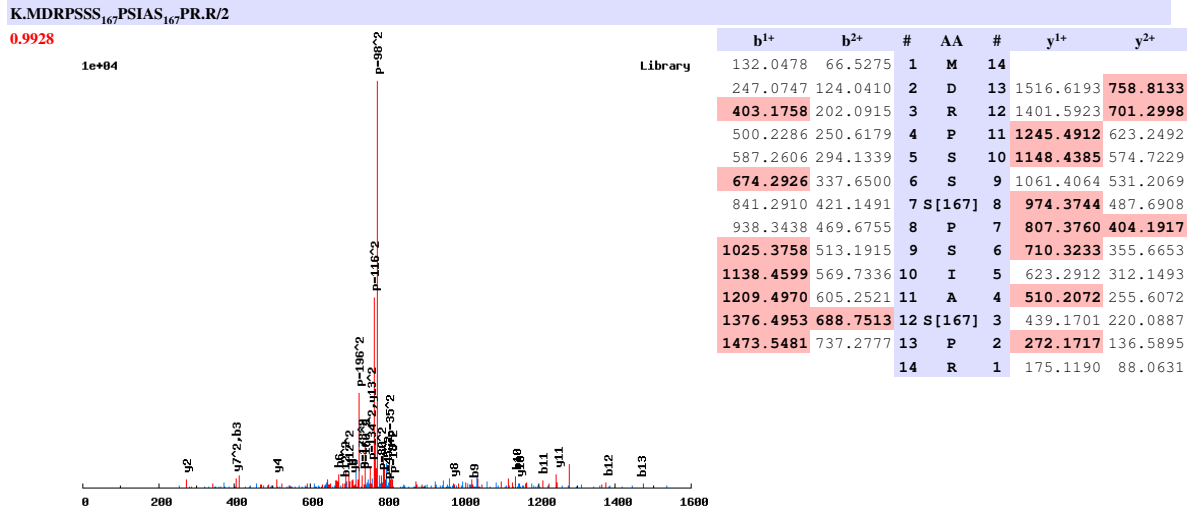

## Annotated spectra from Saleem et. al. 2009

R.MDT<sub>181</sub>NDS<sub>167</sub>ISVAEEK.D/2  
0.9998

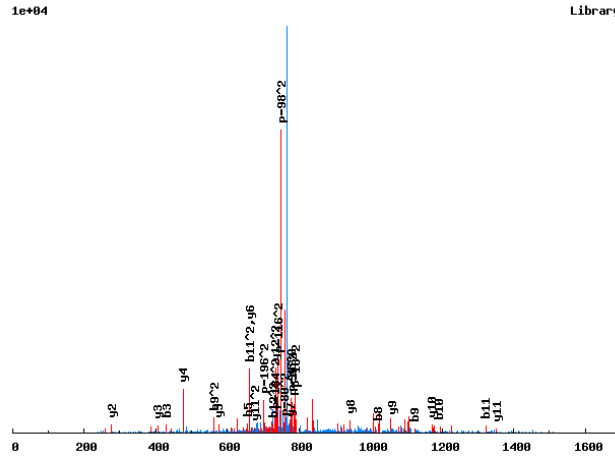

| Library | b <sup>1+</sup> | b <sup>2+</sup> | #  | AA     | #  | y <sup>1+</sup> | y <sup>2+</sup> |
|---------|-----------------|-----------------|----|--------|----|-----------------|-----------------|
|         | 132.0478        | 66.5275         | 1  | M      | 13 |                 |                 |
|         | 247.0747        | 124.0410        | 2  | D      | 12 | 1467.5288       | 734.2680        |
|         | 428.0887        | 214.5480        | 3  | T[181] | 11 | 1352.5018       | 676.7546        |
|         | 542.1317        | 271.5695        | 4  | N      | 10 | 1171.4878       | 586.2476        |
|         | 657.1586        | 329.0829        | 5  | D      | 9  | 1057.4449       | 529.2261        |
|         | 824.1570        | 412.5821        | 6  | S[167] | 8  | 942.4180        | 471.7126        |
|         | 937.2410        | 469.1241        | 7  | I      | 7  | 775.4196        | 388.2134        |
|         | 1024.2730       | 512.6402        | 8  | S      | 6  | 662.3355        | 331.6714        |
|         | 1123.3415       | 562.1744        | 9  | V      | 5  | 575.3035        | 288.1554        |
|         | 1194.3786       | 597.6929        | 10 | A      | 4  | 476.2351        | 238.6212        |
|         | 1323.4212       | 662.2142        | 11 | E      | 3  | 405.1980        | 203.1026        |
|         | 1452.4637       | 726.7355        | 12 | E      | 2  | 276.1554        | 138.5813        |
|         |                 |                 | 13 | K      | 1  | 147.1128        | 74.0600         |



# Annotated spectra from Saleem et. al. 2009

K.MEHSS<sub>167</sub>LS<sub>167</sub>QDVLVK<sub>136</sub>E/2

0.9975

1e+04

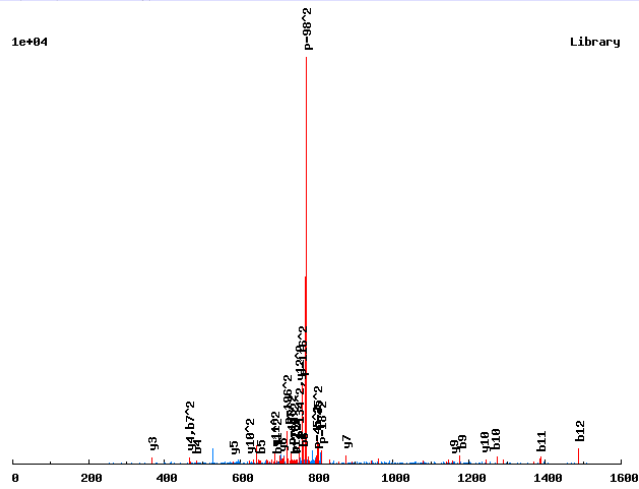

| Library | b <sup>1+</sup> | b <sup>2+</sup> | #  | AA     | #  | y <sup>1+</sup> | y <sup>2+</sup> |
|---------|-----------------|-----------------|----|--------|----|-----------------|-----------------|
|         | 132.0478        | 66.5275         | 1  | M      | 13 |                 |                 |
|         | 261.0904        | 131.0488        | 2  | E      | 12 | 1509.6477       | 755.3275        |
|         | 398.1493        | 199.5783        | 3  | H      | 11 | 1380.6051       | 690.8062        |
|         | 485.1813        | 243.0943        | 4  | S      | 10 | 1243.5462       | 622.2767        |
|         | 652.1797        | 326.5935        | 5  | S[167] | 9  | 1156.5142       | 578.7607        |
|         | 765.2637        | 383.1355        | 6  | L      | 8  | 989.5158        | 495.2615        |
|         | 932.2621        | 466.6347        | 7  | S[167] | 7  | 876.4318        | 438.7195        |
|         | 1060.3207       | 530.6640        | 8  | Q      | 6  | 709.4334        | 355.2203        |
|         | 1175.3476       | 588.1774        | 9  | D      | 5  | 581.3748        | 291.1910        |
|         | 1274.4160       | 637.7116        | 10 | V      | 4  | 466.3479        | 233.6776        |
|         | 1387.5001       | 694.2537        | 11 | L      | 3  | 367.2795        | 184.1434        |
|         | 1486.5685       | 743.7879        | 12 | V      | 2  | 254.1954        | 127.6013        |
|         |                 |                 | 13 | K[136] | 1  | 155.1270        | 78.0671         |

# Annotated spectra from Saleem et. al. 2009

R.MES<sub>167</sub>NVT<sub>181</sub>TAHR<sub>166</sub>S/2

0.9925

1e+04

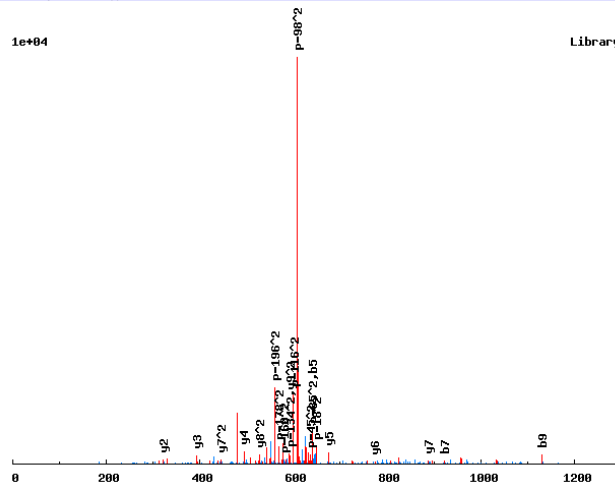

| Library | b <sup>1+</sup> | b <sup>2+</sup> | #  | AA     | #  | y <sup>1+</sup> | y <sup>2+</sup> |
|---------|-----------------|-----------------|----|--------|----|-----------------|-----------------|
|         | 132.0478        | 66.5275         | 1  | M      | 10 |                 |                 |
|         | 261.0904        | 131.0488        | 2  | E      | 9  | 1184.4372       | 592.7223        |
|         | 428.0887        | 214.5480        | 3  | S[167] | 8  | 1055.3946       | 528.2010        |
|         | 542.1317        | 271.5695        | 4  | N      | 7  | 888.3963        | 444.7018        |
|         | 641.2001        | 321.1037        | 5  | V      | 6  | 774.3533        | 387.6803        |
|         | 822.2141        | 411.6107        | 6  | T[181] | 5  | 675.2849        | 338.1461        |
|         | 923.2618        | 462.1345        | 7  | T      | 4  | 494.2709        | 247.6391        |
|         | 994.2989        | 497.6531        | 8  | A      | 3  | 393.2232        | 197.1153        |
|         | 1131.3578       | 566.1825        | 9  | H      | 2  | 322.1861        | 161.5967        |
|         |                 |                 | 10 | R[166] | 1  | 185.1272        | 93.0672         |

# Annotated spectra from Saleem et. al. 2009

K.MFTSTS<sub>167</sub>PRNSS<sub>167</sub>SLDSDHDAYYSK.Q/3

0.6501

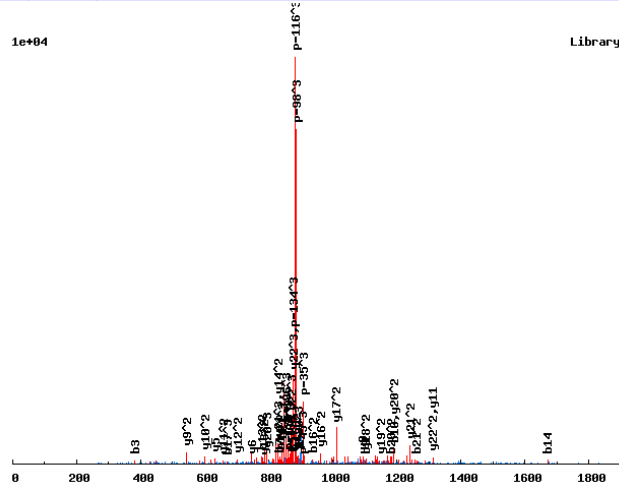

| Library | b <sup>1+</sup>  | b <sup>2+</sup>  | b <sup>3+</sup> | #  | AA     | #  | y <sup>1+</sup>  | y <sup>2+</sup> | y <sup>3+</sup> |
|---------|------------------|------------------|-----------------|----|--------|----|------------------|-----------------|-----------------|
|         | 132.0478         | 66.5275          | 44.6874         | 1  | M      | 23 |                  |                 |                 |
|         | 279.1162         | 140.0617         | 93.7102         | 2  | F      | 22 | 2625.0178        | 1313.0125       | 875.6775        |
|         | <b>380.1639</b>  | 190.5856         | 127.3928        | 3  | T      | 21 | 2477.9494        | 1239.4783       | 826.6547        |
|         | 467.1959         | 234.1016         | 156.4035        | 4  | S      | 20 | 2376.9017        | 1188.9545       | 792.9721        |
|         | 568.2436         | 284.6254         | 190.0860        | 5  | T      | 19 | 2289.8697        | 1145.4385       | 763.9614        |
|         | 735.2419         | 368.1246         | 245.7522        | 6  | S[167] | 18 | 2188.8220        | 1094.9146       | 730.2789        |
|         | <b>832.2947</b>  | 416.6510         | 278.1031        | 7  | P      | 17 | 2021.8236        | 1011.4155       | 674.6127        |
|         | 988.3958         | 494.7015         | 330.1368        | 8  | R      | 16 | 1924.7709        | 962.8891        | 642.2618        |
|         | <b>1102.4387</b> | 551.7230         | 368.1511        | 9  | N      | 15 | 1768.6698        | 884.8385        | 590.2281        |
|         | <b>1189.4708</b> | 595.2390         | 397.1618        | 10 | S      | 14 | 1654.6268        | 827.8171        | 552.2138        |
|         | 1356.4691        | 678.7382         | 452.8279        | 11 | S[167] | 13 | 1567.5948        | 784.3010        | 523.2031        |
|         | 1443.5012        | 722.2542         | 481.8386        | 12 | S      | 12 | 1400.5964        | 700.8019        | 467.5370        |
|         | 1556.5852        | <b>778.7962</b>  | 519.5333        | 13 | L      | 11 | <b>1313.5644</b> | <b>657.2858</b> | 438.5263        |
|         | <b>1671.6122</b> | <b>836.3097</b>  | 557.8756        | 14 | D      | 10 | 1200.4804        | <b>600.7438</b> | 400.8316        |
|         | 1758.6442        | 879.8257         | 586.8862        | 15 | S      | 9  | <b>1085.4534</b> | <b>543.2303</b> | 362.4893        |
|         | 1873.6711        | <b>937.3392</b>  | 625.2286        | 16 | D      | 8  | 998.4214         | 499.7143        | 333.4787        |
|         | 2010.7300        | 1005.8687        | <b>670.9149</b> | 17 | H      | 7  | <b>883.3945</b>  | 442.2009        | 295.1363        |
|         | 2125.7570        | 1063.3821        | 709.2572        | 18 | D      | 6  | <b>746.3355</b>  | 373.6714        | 249.4500        |
|         | 2196.7941        | 1098.9007        | 732.9362        | 19 | A      | 5  | <b>631.3086</b>  | 316.1579        | 211.1077        |
|         | 2359.8574        | <b>1180.4323</b> | 787.2907        | 20 | Y      | 4  | 560.2715         | 280.6394        | 187.4287        |
|         | 2522.9207        | <b>1261.9640</b> | <b>841.6451</b> | 21 | Y      | 3  | 397.2082         | 199.1077        | 133.0742        |
|         | 2609.9528        | 1305.4800        | <b>870.6558</b> | 22 | S      | 2  | 234.1448         | 117.5761        | 78.7198         |
|         |                  |                  |                 | 23 | K      | 1  | 147.1128         | 74.0600         | 49.7091         |

# Annotated spectra from Saleem et. al. 2009

K.MGS<sub>167</sub>-T<sub>181</sub>S<sub>167</sub>AT<sub>181</sub>SK<sub>136</sub>-E/2

0.7091

1e+04

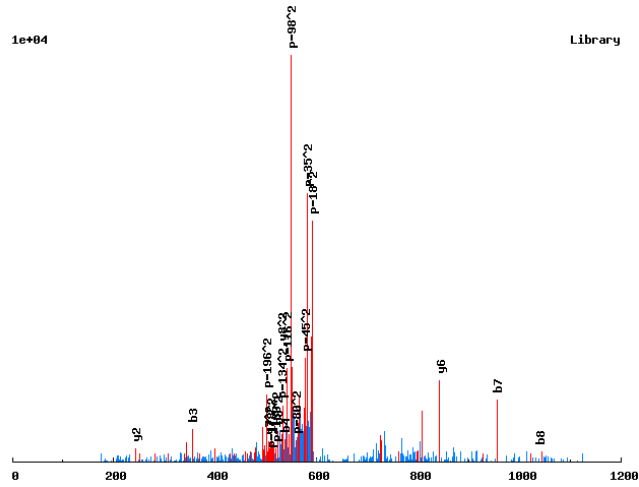

| Library | b <sup>1+</sup> | b <sup>2+</sup> | # | AA     | # | y <sup>1+</sup> | y <sup>2+</sup> |
|---------|-----------------|-----------------|---|--------|---|-----------------|-----------------|
|         | 132.0478        | 66.5275         | 1 | M      | 9 |                 |                 |
|         | 189.0692        | 95.0383         | 2 | G      | 8 | 1066.2423       | 533.6248        |
|         | 356.0676        | 178.5374        | 3 | S[167] | 7 | 1009.2209       | 505.1141        |
|         | 537.0816        | 269.0444        | 4 | T[181] | 6 | 842.2225        | 421.6149        |
|         | 704.0800        | 352.5436        | 5 | S[167] | 5 | 661.2085        | 331.1079        |
|         | 775.1171        | 388.0622        | 6 | A      | 4 | 494.2101        | 247.6087        |
|         | 956.1311        | 478.5692        | 7 | T[181] | 3 | 423.1730        | 212.0902        |
|         | 1043.1631       | 522.0852        | 8 | S      | 2 | 242.1590        | 121.5832        |
|         |                 |                 | 9 | K[136] | 1 | 155.1270        | 78.0671         |

# Annotated spectra from Saleem et. al. 2009

K.M<sub>147</sub>GSTS<sub>167</sub>AT<sub>181</sub>SK<sub>136</sub>ENTPEQDDVATK<sub>136</sub>K<sub>136</sub>.N/3

0.6467

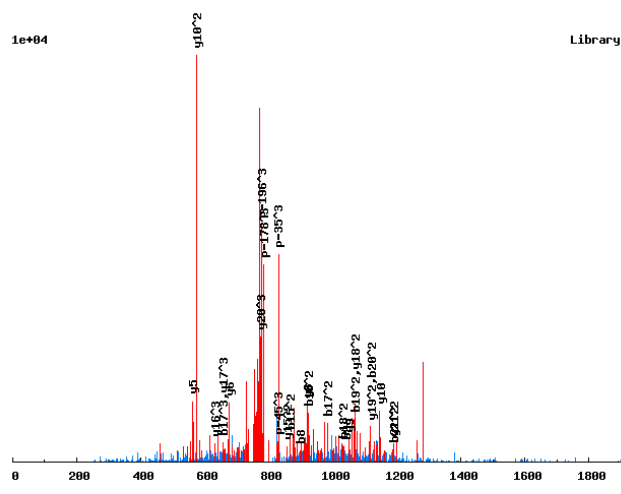

| Library | b <sup>1+</sup> | b <sup>2+</sup> | b <sup>3+</sup> | #  | AA     | #  | y <sup>1+</sup> | y <sup>2+</sup> | y <sup>3+</sup> |
|---------|-----------------|-----------------|-----------------|----|--------|----|-----------------|-----------------|-----------------|
|         | 148.0427        | 74.5250         | 50.0191         | 1  | M[147] | 22 |                 |                 |                 |
|         | 205.0641        | 103.0357        | 69.0262         | 2  | G      | 21 | 2378.0222       | 1189.5147       | 793.3456        |
|         | 292.0962        | 146.5517        | 98.0369         | 3  | S      | 20 | 2321.0007       | 1161.0040       | 774.3384        |
|         | 393.1438        | 197.0756        | 131.7195        | 4  | T      | 19 | 2233.9687       | 1117.4880       | 745.3278        |
|         | 560.1422        | 280.5747        | 187.3856        | 5  | S[167] | 18 | 2132.9210       | 1066.9642       | 711.6452        |
|         | 631.1793        | 316.0933        | 211.0646        | 6  | A      | 17 | 1965.9227       | 983.4650        | 655.9791        |
|         | 812.1933        | 406.6003        | 271.4026        | 7  | T[181] | 16 | 1894.8856       | 947.9464        | 632.3000        |
|         | 899.2254        | 450.1163        | 300.4133        | 8  | S      | 15 | 1713.8716       | 857.4394        | 571.9620        |
|         | 1035.3345       | 518.1709        | 345.7830        | 9  | K[136] | 14 | 1626.8395       | 813.9234        | 542.9514        |
|         | 1164.3771       | 582.6922        | 388.7972        | 10 | E      | 13 | 1490.7304       | 745.8688        | 497.5816        |
|         | 1278.4200       | 639.7137        | 426.8115        | 11 | N      | 12 | 1361.6878       | 681.3475        | 454.5674        |
|         | 1379.4677       | 690.2375        | 460.4941        | 12 | T      | 11 | 1247.6448       | 624.3261        | 416.5531        |
|         | 1476.5205       | 738.7639        | 492.8450        | 13 | P      | 10 | 1146.5972       | 573.8022        | 382.8706        |
|         | 1605.5631       | 803.2852        | 535.8592        | 14 | E      | 9  | 1049.5444       | 525.2758        | 350.5197        |
|         | 1733.6217       | 867.3145        | 578.5454        | 15 | Q      | 8  | 920.5018        | 460.7545        | 307.5055        |
|         | 1848.6486       | 924.8279        | 616.8877        | 16 | D      | 7  | 792.4432        | 396.7253        | 264.8193        |
|         | 1963.6755       | 982.3414        | 655.2300        | 17 | D      | 6  | 677.4163        | 339.2118        | 226.4770        |
|         | 2062.7439       | 1031.8756       | 688.2528        | 18 | V      | 5  | 562.3894        | 281.6983        | 188.1346        |
|         | 2133.7811       | 1067.3942       | 711.9319        | 19 | A      | 4  | 463.3209        | 232.1641        | 155.1118        |
|         | 2234.8287       | 1117.9180       | 745.6144        | 20 | T      | 3  | 392.2838        | 196.6456        | 131.4328        |
|         | 2370.9379       | 1185.9726       | 790.9841        | 21 | K[136] | 2  | 291.2362        | 146.1217        | 97.7502         |
|         |                 |                 |                 | 22 | K[136] | 1  | 155.1270        | 78.0671         | 52.3805         |

# Annotated spectra from Saleem et. al. 2009

K.MGS<sub>167</sub>TSAT<sub>181</sub>SK<sub>136</sub>ENT<sub>181</sub>PEQDDVATK<sub>136</sub>K<sub>136</sub>N/3

0.6811

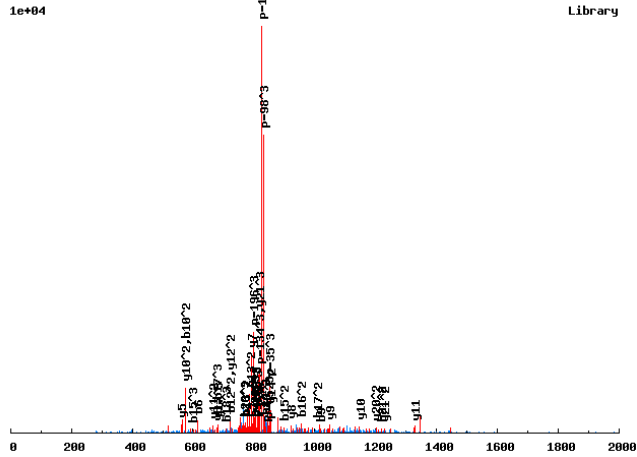

| Library | b <sup>1+</sup> | b <sup>2+</sup> | b <sup>3+</sup> | #  | AA     | #  | y <sup>1+</sup> | y <sup>2+</sup> | y <sup>3+</sup> |
|---------|-----------------|-----------------|-----------------|----|--------|----|-----------------|-----------------|-----------------|
|         | 132.0478        | 66.5275         | 44.6874         | 1  | M      | 22 |                 |                 |                 |
|         | 189.0692        | 95.0383         | 63.6946         | 2  | G      | 21 | 2457.9885       | 1229.4979       | 820.0010        |
|         | 356.0676        | 178.5374        | 119.3607        | 3  | S[167] | 20 | 2400.9671       | 1200.9872       | 800.9939        |
|         | 457.1153        | 229.0613        | 153.0433        | 4  | T      | 19 | 2233.9687       | 1117.4880       | 745.3278        |
|         | 544.1473        | 272.5773        | 182.0540        | 5  | S      | 18 | 2132.9210       | 1066.9642       | 711.6452        |
|         | 615.1844        | 308.0958        | 205.7330        | 6  | A      | 17 | 2045.8890       | 1023.4481       | 682.6345        |
|         | 796.1984        | 398.6029        | 266.0710        | 7  | T[181] | 16 | 1974.8519       | 987.9296        | 658.9555        |
|         | 883.2305        | 442.1189        | 295.0817        | 8  | S      | 15 | 1793.8379       | 897.4226        | 598.6175        |
|         | 1019.3396       | 510.1734        | 340.4514        | 9  | K[136] | 14 | 1706.8059       | 853.9066        | 569.6068        |
|         | 1148.3822       | 574.6947        | 383.4656        | 10 | E      | 13 | 1570.6967       | 785.8520        | 524.2371        |
|         | 1262.4251       | 631.7162        | 421.4799        | 11 | N      | 12 | 1441.6541       | 721.3307        | 481.2229        |
|         | 1443.4391       | 722.2232        | 481.8179        | 12 | T[181] | 11 | 1327.6112       | 664.3092        | 443.2086        |
|         | 1540.4919       | 770.7496        | 514.1688        | 13 | P      | 10 | 1146.5972       | 573.8022        | 382.8706        |
|         | 1669.5345       | 835.2709        | 557.1830        | 14 | E      | 9  | 1049.5444       | 525.2758        | 350.5197        |
|         | 1797.5931       | 899.3002        | 599.8692        | 15 | Q      | 8  | 920.5018        | 460.7545        | 307.5055        |
|         | 1912.6200       | 956.8136        | 638.2115        | 16 | D      | 7  | 792.4432        | 396.7253        | 264.8193        |
|         | 2027.6470       | 1014.3271       | 676.5538        | 17 | D      | 6  | 677.4163        | 339.2118        | 226.4770        |
|         | 2126.7154       | 1063.8613       | 709.5766        | 18 | V      | 5  | 562.3894        | 281.6983        | 188.1346        |
|         | 2197.7525       | 1099.3799       | 733.2557        | 19 | A      | 4  | 463.3209        | 232.1641        | 155.1118        |
|         | 2298.8002       | 1149.9037       | 766.9382        | 20 | T      | 3  | 392.2838        | 196.6456        | 131.4328        |
|         | 2434.9093       | 1217.9583       | 812.3080        | 21 | K[136] | 2  | 291.2362        | 146.1217        | 97.7502         |
|         |                 |                 |                 | 22 | K[136] | 1  | 155.1270        | 78.0671         | 52.3805         |

# Annotated spectra from Saleem et. al. 2009

K.MIDS<sub>167</sub>NVS<sub>167</sub>KTYEEHETV.-/2

0.9193

1e+04

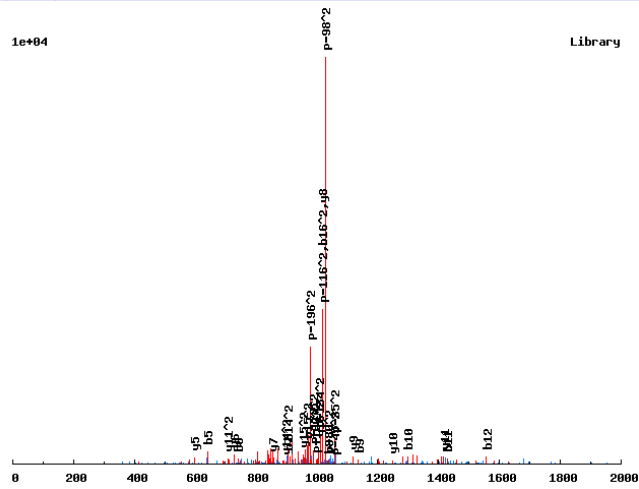

| Library | b <sup>1+</sup> | b <sup>2+</sup> | #  | AA      | #  | y <sup>1+</sup> | y <sup>2+</sup> |
|---------|-----------------|-----------------|----|---------|----|-----------------|-----------------|
|         | 132.0478        | 66.5275         | 1  | M       | 17 |                 |                 |
|         | 245.1318        | 123.0696        | 2  | I       | 16 | 2023.8297       | 1012.4185       |
|         | 360.1588        | 180.5830        | 3  | D       | 15 | 1910.7456       | 955.8765        |
|         | 527.1571        | 264.0822        | 4  | S [167] | 14 | 1795.7187       | 898.3630        |
|         | 641.2001        | 321.1037        | 5  | N       | 13 | 1628.7203       | 814.8638        |
|         | 740.2685        | 370.6379        | 6  | V       | 12 | 1514.6774       | 757.8423        |
|         | 907.2668        | 454.1371        | 7  | S [167] | 11 | 1415.6090       | 708.3081        |
|         | 1035.3618       | 518.1845        | 8  | K       | 10 | 1248.6106       | 624.8090        |
|         | 1136.4095       | 568.7084        | 9  | T       | 9  | 1120.5157       | 560.7615        |
|         | 1299.4728       | 650.2400        | 10 | Y       | 8  | 1019.4680       | 510.2376        |
|         | 1428.5154       | 714.7613        | 11 | E       | 7  | 856.4047        | 428.7060        |
|         | 1557.5580       | 779.2826        | 12 | E       | 6  | 727.3621        | 364.1847        |
|         | 1694.6169       | 847.8121        | 13 | H       | 5  | 598.3195        | 299.6634        |
|         | 1807.7010       | 904.3541        | 14 | I       | 4  | 461.2606        | 231.1339        |
|         | 1936.7435       | 968.8754        | 15 | E       | 3  | 348.1765        | 174.5919        |
|         | 2037.7912       | 1019.3993       | 16 | T       | 2  | 219.1339        | 110.0706        |
|         |                 |                 | 17 | V       | 1  | 118.0862        | 59.5468         |

Annotated spectra from Saleem et. al. 2009

K.MIGVLNNS<sub>16</sub>SESEDEES<sub>16</sub>NDEKQK.A/3

0.9993

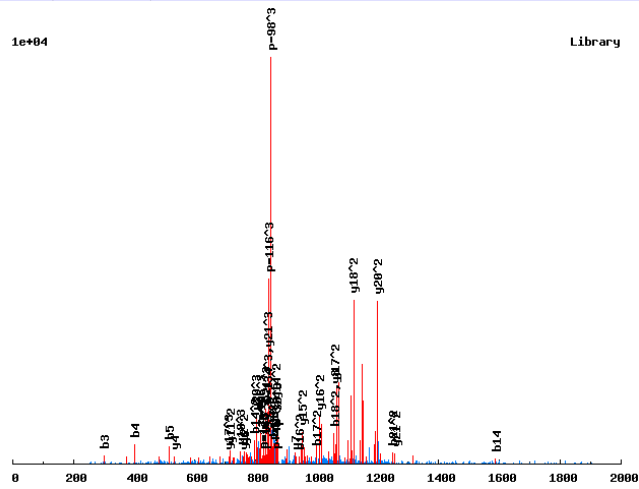

| Library | b <sup>1+</sup> | b <sup>2+</sup> | b <sup>3+</sup> | #  | AA     | #  | y <sup>1+</sup> | y <sup>2+</sup> | y <sup>3+</sup> |
|---------|-----------------|-----------------|-----------------|----|--------|----|-----------------|-----------------|-----------------|
|         | 132.0478        | 66.5275         | 44.6874         | 1  | M      | 22 |                 |                 |                 |
|         | 245.1318        | 123.0696        | 82.3821         | 2  | I      | 21 | 2510.9807       | 1255.9940       | 837.6651        |
|         | 302.1533        | 151.5803        | 101.3893        | 3  | G      | 20 | 2397.8967       | 1199.4520       | 799.9704        |
|         | 401.2217        | 201.1145        | 134.4121        | 4  | V      | 19 | 2340.8752       | 1170.9412       | 780.9633        |
|         | 514.3058        | 257.6565        | 172.1068        | 5  | L      | 18 | 2241.8068       | 1121.4070       | 747.9405        |
|         | 628.3487        | 314.6780        | 210.1211        | 6  | N      | 17 | 2128.7227       | 1064.8650       | 710.2458        |
|         | 742.3916        | 371.6995        | 248.1354        | 7  | N      | 16 | 2014.6798       | 1007.8435       | 672.2315        |
|         | 909.3900        | 455.1986        | 303.8015        | 8  | S[167] | 15 | 1900.6369       | 950.8221        | 634.2171        |
|         | 996.4220        | 498.7146        | 332.8122        | 9  | S      | 14 | 1733.6385       | 867.3229        | 578.5510        |
|         | 1125.4646       | 563.2359        | 375.8264        | 10 | E      | 13 | 1646.6065       | 823.8069        | 549.5404        |
|         | 1212.4966       | 606.7520        | 404.8371        | 11 | S      | 12 | 1517.5639       | 759.2856        | 506.5262        |
|         | 1327.5236       | 664.2654        | 443.1794        | 12 | D      | 11 | 1430.5319       | 715.7696        | 477.5155        |
|         | 1456.5662       | 728.7867        | 486.1936        | 13 | E      | 10 | 1315.5049       | 658.2561        | 439.1732        |
|         | 1585.6088       | 793.3080        | 529.2078        | 14 | E      | 9  | 1186.4623       | 593.7348        | 396.1590        |
|         | 1714.6513       | 857.8293        | 572.2220        | 15 | E      | 8  | 1057.4198       | 529.2135        | 353.1448        |
|         | 1881.6497       | 941.3285        | 627.8881        | 16 | S[167] | 7  | 928.3772        | 464.6922        | 310.1306        |
|         | 1995.6926       | 998.3500        | 665.9024        | 17 | N      | 6  | 761.3788        | 381.1930        | 254.4645        |
|         | 2110.7196       | 1055.8634       | 704.2447        | 18 | D      | 5  | 647.3359        | 324.1716        | 216.4501        |
|         | 2239.7622       | 1120.3847       | 747.2589        | 19 | E      | 4  | 532.3089        | 266.6581        | 178.1078        |
|         | 2367.8571       | 1184.4322       | 789.9572        | 20 | K      | 3  | 403.2663        | 202.1368        | 135.0936        |
|         | 2495.9157       | 1248.4615       | 832.6434        | 21 | Q      | 2  | 275.1714        | 138.0893        | 92.3953         |
|         |                 |                 |                 | 22 | K      | 1  | 147.1128        | 74.0600         | 49.7091         |



# Annotated spectra from Saleem et. al. 2009

R.MKS<sub>167</sub>SS<sub>167</sub>MFDLGK.S/2

0.9919

1e+04

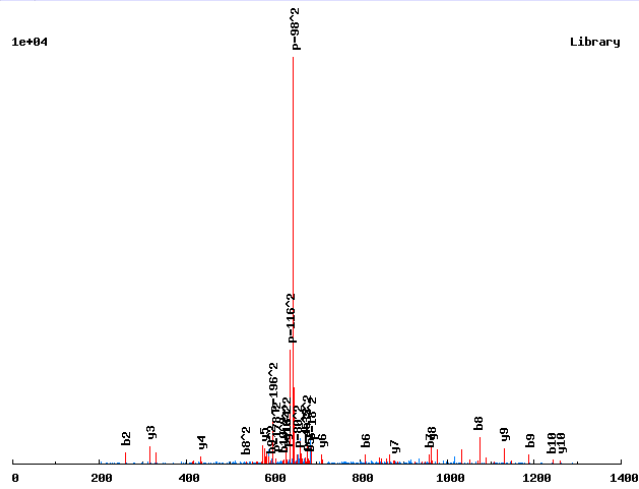

| Library | b <sup>1+</sup>  | b <sup>2+</sup> | #  | AA     | #  | y <sup>1+</sup>  | y <sup>2+</sup> |
|---------|------------------|-----------------|----|--------|----|------------------|-----------------|
|         | 132.0478         | 66.5275         | 1  | M      | 11 |                  |                 |
|         | <b>260.1427</b>  | 130.5750        | 2  | K      | 10 | <b>1259.4779</b> | <b>630.2426</b> |
|         | 427.1411         | 214.0742        | 3  | S[167] | 9  | 1131.3829        | 566.1951        |
|         | 514.1731         | 257.5902        | 4  | S      | 8  | <b>964.3846</b>  | 482.6959        |
|         | <b>681.1715</b>  | 341.0894        | 5  | S[167] | 7  | <b>877.3525</b>  | 439.1799        |
|         | <b>812.2120</b>  | 406.6096        | 6  | M      | 6  | <b>710.3542</b>  | 355.6807        |
|         | <b>959.2804</b>  | 480.1438        | 7  | F      | 5  | <b>579.3137</b>  | 290.1605        |
|         | <b>1074.3073</b> | <b>537.6573</b> | 8  | D      | 4  | <b>432.2453</b>  | 216.6263        |
|         | <b>1187.3914</b> | <b>594.1993</b> | 9  | L      | 3  | <b>317.2183</b>  | 159.1128        |
|         | <b>1244.4128</b> | <b>622.7101</b> | 10 | G      | 2  | 204.1343         | 102.5708        |
|         |                  |                 | 11 | K      | 1  | 147.1128         | 74.0600         |

# Annotated spectra from Saleem et. al. 2009

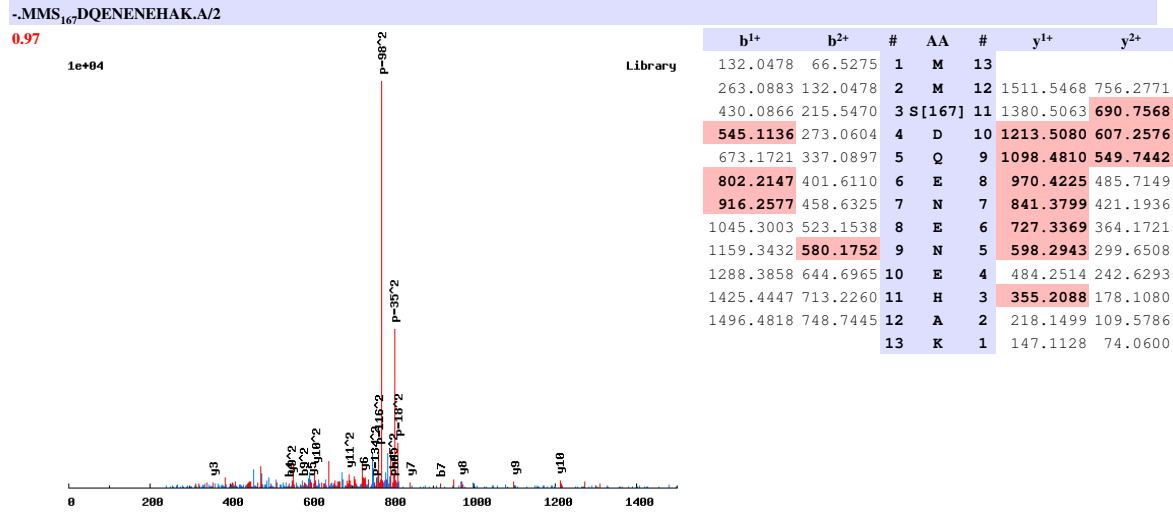

# Annotated spectra from Saleem et. al. 2009

K.M<sub>147</sub>M<sub>147</sub>S<sub>167</sub>FQANPT<sub>181</sub>EESISK<sub>136</sub>F/3

0.6244

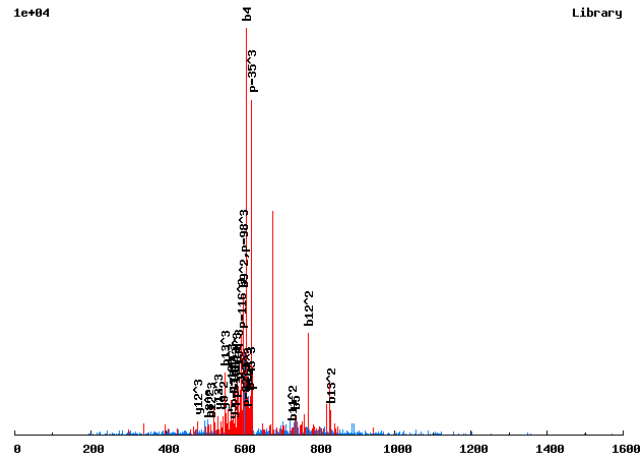

| Library | b <sup>1+</sup> | b <sup>2+</sup> | b <sup>3+</sup> | #  | AA     | #  | y <sup>1+</sup> | y <sup>2+</sup> | y <sup>3+</sup> |
|---------|-----------------|-----------------|-----------------|----|--------|----|-----------------|-----------------|-----------------|
|         | 148.0427        | 74.5250         | 50.0191         | 1  | M[147] | 15 |                 |                 |                 |
|         | 295.0781        | 148.0427        | 99.0309         | 2  | M[147] | 14 | 1752.6679       | 876.8376        | 584.8941        |
|         | 462.0764        | 231.5419        | 154.6970        | 3  | S[167] | 13 | 1605.6325       | 803.3199        | 535.8823        |
|         | 609.1449        | 305.0761        | 203.7198        | 4  | F      | 12 | 1438.6341       | 719.8207        | 480.2162        |
|         | 737.2034        | 369.1054        | 246.4060        | 5  | Q      | 11 | 1291.5657       | 646.2865        | 431.1934        |
|         | 808.2405        | 404.6239        | 270.0850        | 6  | A      | 10 | 1163.5071       | 582.2572        | 388.5072        |
|         | 922.2835        | 461.6454        | 308.0993        | 7  | N      | 9  | 1092.4700       | 546.7386        | 364.8282        |
|         | 1019.3362       | 510.1718        | 340.4503        | 8  | P      | 8  | 978.4271        | 489.7172        | 326.8139        |
|         | 1200.3502       | 600.6788        | 400.7883        | 9  | T[181] | 7  | 881.3743        | 441.1908        | 294.4630        |
|         | 1329.3928       | 665.2001        | 443.8025        | 10 | E      | 6  | 700.3603        | 350.6838        | 234.1250        |
|         | 1458.4354       | 729.7214        | 486.8167        | 11 | E      | 5  | 571.3177        | 286.1625        | 191.1108        |
|         | 1545.4675       | 773.2374        | 515.8273        | 12 | S      | 4  | 442.2751        | 221.6412        | 148.0966        |
|         | 1658.5515       | 829.7794        | 553.5220        | 13 | I      | 3  | 355.2431        | 178.1252        | 119.0859        |
|         | 1745.5835       | 873.2954        | 582.5327        | 14 | S      | 2  | 242.1590        | 121.5832        | 81.3912         |
|         |                 |                 |                 | 15 | K[136] | 1  | 155.1270        | 78.0671         | 52.3805         |

# Annotated spectra from Saleem et. al. 2009

R.MNFS<sub>167</sub>HGSYEYHK.S/3

0.7143

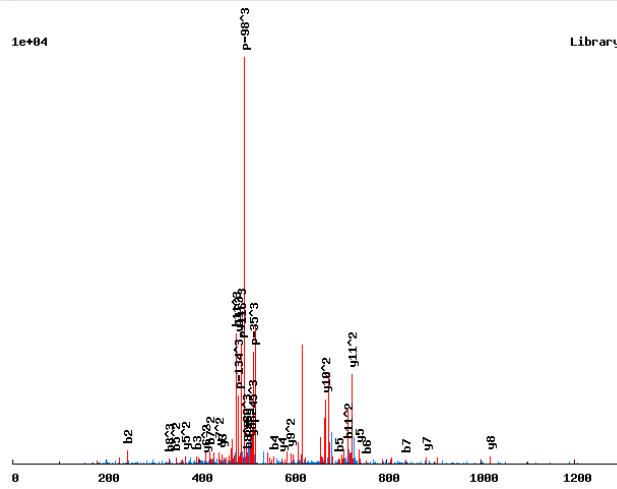

| Library | b <sup>1+</sup> | b <sup>2+</sup> | b <sup>3+</sup> | #  | AA     | #  | y <sup>1+</sup>  | y <sup>2+</sup> | y <sup>3+</sup> |
|---------|-----------------|-----------------|-----------------|----|--------|----|------------------|-----------------|-----------------|
|         | 132.0478        | 66.5275         | 44.6874         | 1  | M      | 12 |                  |                 |                 |
|         | <b>246.0907</b> | 123.5490        | 82.7018         | 2  | N      | 11 | 1448.5631        | <b>724.7852</b> | <b>483.5259</b> |
|         | <b>393.1591</b> | 197.0832        | 131.7246        | 3  | F      | 10 | 1334.5201        | <b>667.7637</b> | 445.5116        |
|         | <b>560.1575</b> | 280.5824        | 187.3907        | 4  | S[167] | 9  | 1187.4517        | <b>594.2295</b> | 396.4888        |
|         | <b>697.2164</b> | <b>349.1118</b> | 233.0770        | 5  | H      | 8  | <b>1020.4534</b> | <b>510.7303</b> | 340.8226        |
|         | <b>754.2378</b> | 377.6226        | 252.0841        | 6  | G      | 7  | <b>883.3945</b>  | <b>442.2009</b> | 295.1363        |
|         | <b>841.2699</b> | <b>421.1386</b> | 281.0948        | 7  | S      | 6  | 826.3730         | <b>413.6901</b> | 276.1292        |
|         | 1004.3332       | <b>502.6702</b> | <b>335.4493</b> | 8  | Y      | 5  | <b>739.3410</b>  | <b>370.1741</b> | 247.1185        |
|         | 1133.3758       | 567.1915        | 378.4635        | 9  | E      | 4  | <b>576.2776</b>  | 288.6425        | 192.7641        |
|         | 1296.4391       | 648.7232        | 432.8179        | 10 | Y      | 3  | <b>447.2350</b>  | 224.1212        | 149.7499        |
|         | 1433.4980       | <b>717.2527</b> | <b>478.5042</b> | 11 | H      | 2  | 284.1717         | 142.5895        | 95.3954         |
|         |                 |                 |                 | 12 | K      | 1  | 147.1128         | 74.0600         | 49.7091         |

# Annotated spectra from Saleem et. al. 2009

R.MNS<sub>167</sub>MTS<sub>167</sub>GANVR<sub>166</sub>R<sub>166</sub>N/2

0.8049

1e+04

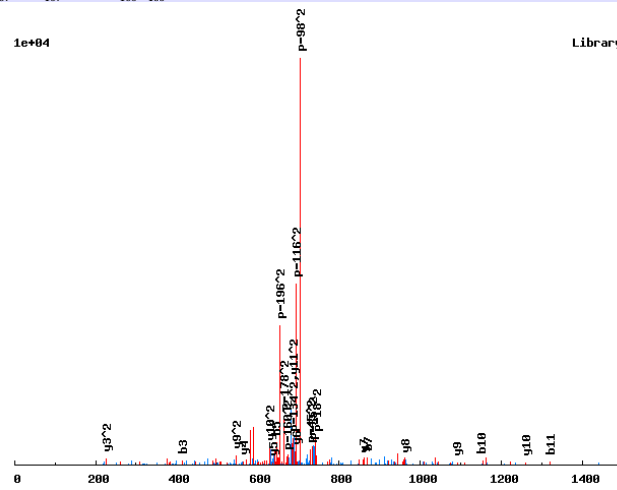

| Library | b <sup>1+</sup> | b <sup>2+</sup> | #  | AA     | #  | y <sup>1+</sup> | y <sup>2+</sup> |
|---------|-----------------|-----------------|----|--------|----|-----------------|-----------------|
|         | 132.0478        | 66.5275         | 1  | M      | 12 |                 |                 |
|         | 246.0907        | 123.5490        | 2  | N      | 11 | 1372.5343       | 686.7708        |
|         | 413.0891        | 207.0482        | 3  | S[167] | 10 | 1258.4914       | 629.7493        |
|         | 544.1296        | 272.5684        | 4  | M      | 9  | 1091.4930       | 546.2502        |
|         | 645.1772        | 323.0923        | 5  | T      | 8  | 960.4525        | 480.7299        |
|         | 812.1756        | 406.5914        | 6  | S[167] | 7  | 859.4049        | 430.2061        |
|         | 869.1971        | 435.1022        | 7  | G      | 6  | 692.4065        | 346.7069        |
|         | 940.2342        | 470.6207        | 8  | A      | 5  | 635.3850        | 318.1962        |
|         | 1054.2771       | 527.6422        | 9  | N      | 4  | 564.3479        | 282.6776        |
|         | 1153.3455       | 577.1764        | 10 | V      | 3  | 450.3050        | 225.6561        |
|         | 1319.4549       | 660.2311        | 11 | R[166] | 2  | 351.2366        | 176.1219        |
|         |                 |                 | 12 | R[166] | 1  | 185.1272        | 93.0672         |

# Annotated spectra from Saleem et. al. 2009

R.MNSSFLS<sub>167</sub>SSS<sub>167</sub>IGDK.I/2

0.9999

1e+04

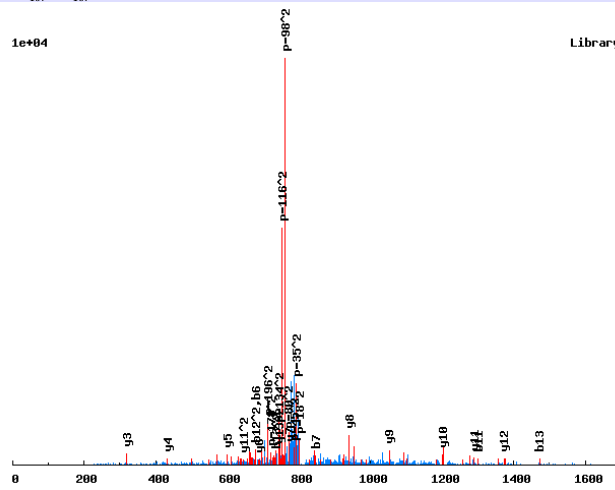

| Library | b <sup>1+</sup> | b <sup>2+</sup> | #  | AA     | #  | y <sup>1+</sup> | y <sup>2+</sup> |
|---------|-----------------|-----------------|----|--------|----|-----------------|-----------------|
|         | 132.0478        | 66.5275         | 1  | M      | 14 |                 |                 |
|         | 246.0907        | 123.5490        | 2  | N      | 13 | 1488.5655       | 744.7864        |
|         | 333.1227        | 167.0650        | 3  | S      | 12 | 1374.5226       | 687.7649        |
|         | 420.1548        | 210.5810        | 4  | S      | 11 | 1287.4905       | 644.2489        |
|         | 567.2232        | 284.1152        | 5  | F      | 10 | 1200.4585       | 600.7329        |
|         | 680.3072        | 340.6573        | 6  | L      | 9  | 1053.3901       | 527.1987        |
|         | 847.3056        | 424.1564        | 7  | S[167] | 8  | 940.3060        | 470.6567        |
|         | 934.3376        | 467.6725        | 8  | S      | 7  | 773.3077        | 387.1575        |
|         | 1021.3697       | 511.1885        | 9  | S      | 6  | 686.2757        | 343.6415        |
|         | 1188.3680       | 594.6876        | 10 | S[167] | 5  | 599.2436        | 300.1255        |
|         | 1301.4521       | 651.2297        | 11 | I      | 4  | 432.2453        | 216.6263        |
|         | 1358.4735       | 679.7404        | 12 | G      | 3  | 319.1612        | 160.0842        |
|         | 1473.5005       | 737.2539        | 13 | D      | 2  | 262.1397        | 131.5735        |
|         |                 |                 | 14 | K      | 1  | 147.1128        | 74.0600         |

# Annotated spectra from Saleem et. al. 2009

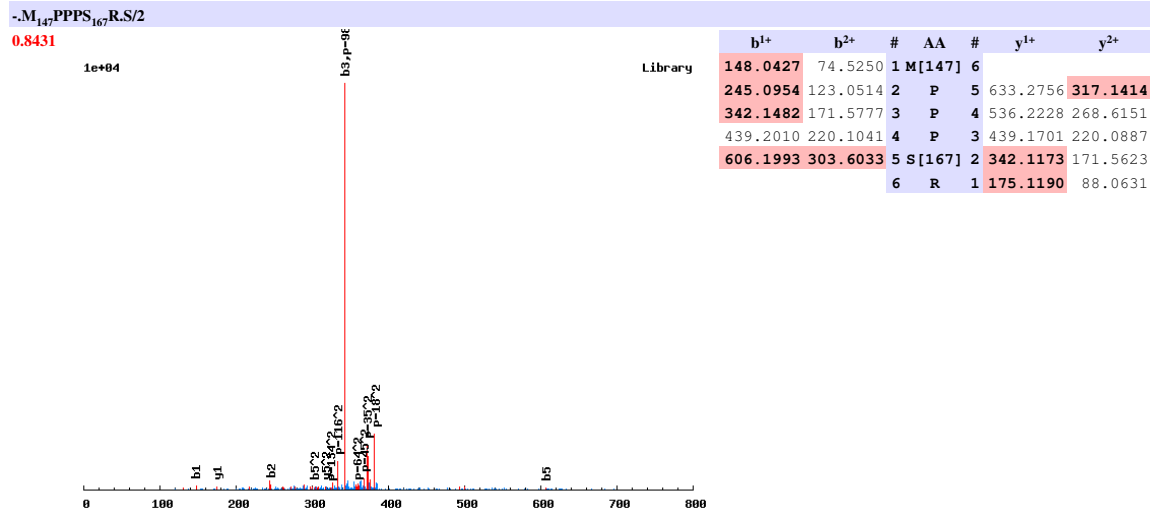

# Annotated spectra from Saleem et. al. 2009

K.MR<sub>166</sub>EEEQTSQEK<sub>136</sub>S<sub>167</sub>PQENTLPR<sub>166</sub>E/3

0.9326

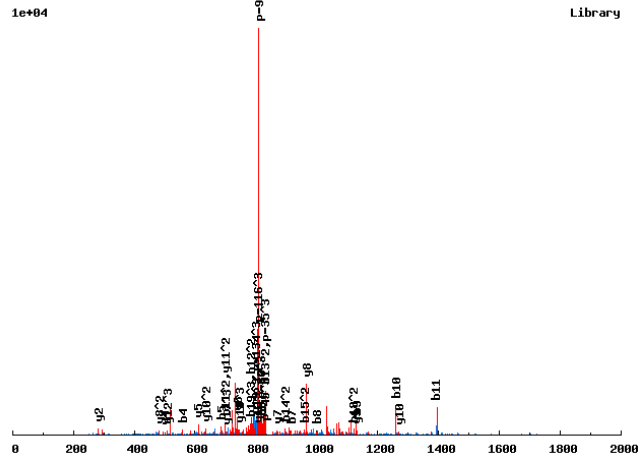

| Library | b <sup>1+</sup> | b <sup>2+</sup> | b <sup>3+</sup> | #  | AA     | #  | y <sup>1+</sup> | y <sup>2+</sup> | y <sup>3+</sup> |
|---------|-----------------|-----------------|-----------------|----|--------|----|-----------------|-----------------|-----------------|
|         | 132.0478        | 66.5275         | 44.6874         | 1  | M      | 20 |                 |                 |                 |
|         | 298.1571        | 149.5822        | 100.0572        | 2  | R[166] | 19 | 2394.0927       | 1197.5500       | 798.7024        |
|         | 427.1997        | 214.1035        | 143.0714        | 3  | E      | 18 | 2227.9833       | 1114.4953       | 743.3326        |
|         | 556.2423        | 278.6248        | 186.0856        | 4  | E      | 17 | 2098.9407       | 1049.9740       | 700.3184        |
|         | 685.2849        | 343.1461        | 229.0998        | 5  | E      | 16 | 1969.8981       | 985.4527        | 657.3042        |
|         | 813.3435        | 407.1754        | 271.7860        | 6  | Q      | 15 | 1840.8556       | 920.9314        | 614.2900        |
|         | 914.3912        | 457.6992        | 305.4686        | 7  | T      | 14 | 1712.7970       | 856.9021        | 571.6038        |
|         | 1001.4232       | 501.2152        | 334.4793        | 8  | S      | 13 | 1611.7493       | 806.3783        | 537.9213        |
|         | 1129.4818       | 565.2445        | 377.1654        | 9  | Q      | 12 | 1524.7173       | 762.8623        | 508.9106        |
|         | 1258.5244       | 629.7658        | 420.1796        | 10 | E      | 11 | 1396.6587       | 698.8330        | 466.2244        |
|         | 1394.6335       | 697.8204        | 465.5494        | 11 | K[136] | 10 | 1267.6161       | 634.3117        | 423.2102        |
|         | 1561.6319       | 781.3196        | 521.2155        | 12 | S[167] | 9  | 1131.5069       | 566.2571        | 377.8405        |
|         | 1658.6847       | 829.8460        | 553.5664        | 13 | P      | 8  | 964.5086        | 482.7579        | 322.1744        |
|         | 1786.7432       | 893.8753        | 596.2526        | 14 | Q      | 7  | 867.4558        | 434.2315        | 289.8235        |
|         | 1915.7858       | 958.3966        | 639.2668        | 15 | E      | 6  | 739.3972        | 370.2023        | 247.1373        |
|         | 2029.8288       | 1015.4180       | 677.2811        | 16 | N      | 5  | 610.3546        | 305.6810        | 204.1231        |
|         | 2130.8764       | 1065.9419       | 710.9637        | 17 | T      | 4  | 496.3117        | 248.6595        | 166.1088        |
|         | 2243.9605       | 1122.4839       | 748.6584        | 18 | L      | 3  | 395.2640        | 198.1357        | 132.4262        |
|         | 2341.0133       | 1171.0103       | 781.0093        | 19 | P      | 2  | 282.1800        | 141.5936        | 94.7315         |
|         |                 |                 |                 | 20 | R[166] | 1  | 185.1272        | 93.0672         | 62.3806         |



# Annotated spectra from Saleem et. al. 2009

R.MRS<sub>167</sub>HTNSAS<sub>167</sub>DLDSVPVEQLR.E/3

0.9975

1e+04

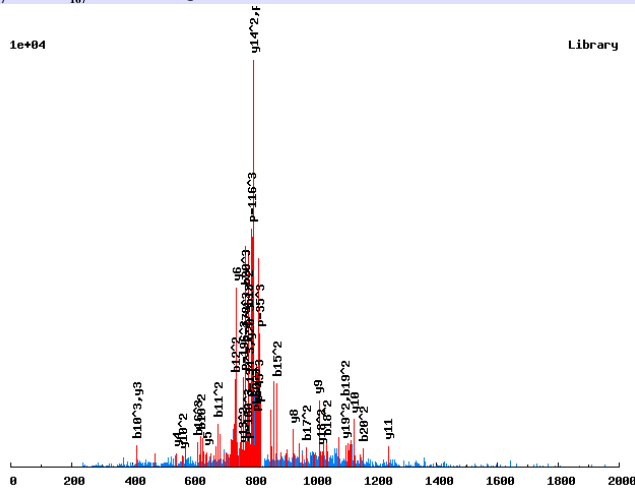

| Library | b <sup>1+</sup> | b <sup>2+</sup>  | b <sup>3+</sup> | #  | AA     | #  | y <sup>1+</sup>  | y <sup>2+</sup>  | y <sup>3+</sup> |
|---------|-----------------|------------------|-----------------|----|--------|----|------------------|------------------|-----------------|
|         | 132.0478        | 66.5275          | 44.6874         | 1  | M      | 21 |                  |                  |                 |
|         | 288.1489        | 144.5781         | 96.7211         | 2  | R      | 20 | 2358.0123        | 1179.5098        | <b>786.6756</b> |
|         | 455.1472        | 228.0773         | 152.3873        | 3  | S[167] | 19 | 2201.9111        | <b>1101.4592</b> | 734.6419        |
|         | 592.2062        | 296.6067         | 198.0736        | 4  | H      | 18 | 2034.9128        | <b>1017.9600</b> | 678.9758        |
|         | 693.2538        | 347.1306         | 231.7561        | 5  | T      | 17 | 1897.8539        | 949.4306         | 633.2895        |
|         | <b>807.2968</b> | 404.1520         | 269.7704        | 6  | N      | 16 | 1796.8062        | 898.9067         | 599.6069        |
|         | 894.3288        | 447.6680         | 298.7811        | 7  | S      | 15 | 1682.7633        | 841.8853         | 561.5926        |
|         | 965.3659        | 483.1866         | 322.4602        | 8  | A      | 14 | 1595.7312        | <b>798.3693</b>  | 532.5819        |
|         | 1132.3643       | 566.6858         | 378.1263        | 9  | S[167] | 13 | 1524.6941        | <b>762.8507</b>  | 508.9029        |
|         | 1247.3912       | <b>624.1992</b>  | <b>416.4686</b> | 10 | D      | 12 | 1357.6958        | 679.3515         | 453.2368        |
|         | 1360.4753       | <b>680.7413</b>  | 454.1633        | 11 | L      | 11 | <b>1242.6688</b> | 621.8381         | 414.8945        |
|         | 1475.5022       | <b>738.2547</b>  | 492.5056        | 12 | D      | 10 | <b>1129.5848</b> | <b>565.2960</b>  | 377.1998        |
|         | 1562.5342       | <b>781.7708</b>  | 521.5163        | 13 | S      | 9  | <b>1014.5578</b> | 507.7826         | 338.8575        |
|         | 1661.6026       | 831.3050         | 554.5391        | 14 | V      | 8  | <b>927.5258</b>  | 464.2665         | 309.8468        |
|         | 1748.6347       | <b>874.8210</b>  | 583.5497        | 15 | S      | 7  | 828.4574         | 414.7323         | 276.8240        |
|         | 1845.6874       | 923.3474         | <b>615.9007</b> | 16 | P      | 6  | <b>741.4254</b>  | 371.2163         | 247.8133        |
|         | 1944.7558       | <b>972.8816</b>  | 648.9235        | 17 | V      | 5  | <b>644.3726</b>  | 322.6899         | 215.4624        |
|         | 2073.7984       | <b>1037.4029</b> | 691.9377        | 18 | E      | 4  | <b>545.3042</b>  | 273.1557         | 182.4396        |
|         | 2201.8570       | <b>1101.4321</b> | 734.6239        | 19 | Q      | 3  | <b>416.2616</b>  | 208.6344         | 139.4254        |
|         | 2314.9411       | <b>1157.9742</b> | <b>772.3185</b> | 20 | L      | 2  | 288.2030         | 144.6051         | 96.7392         |
|         |                 |                  |                 | 21 | R      | 1  | 175.1190         | 88.0631          | 59.0445         |

Annotated spectra from Saleem et. al. 2009

-M<sub>147</sub>SAGDIS<sub>167</sub>AINIKSVK.K/4  
0.7298

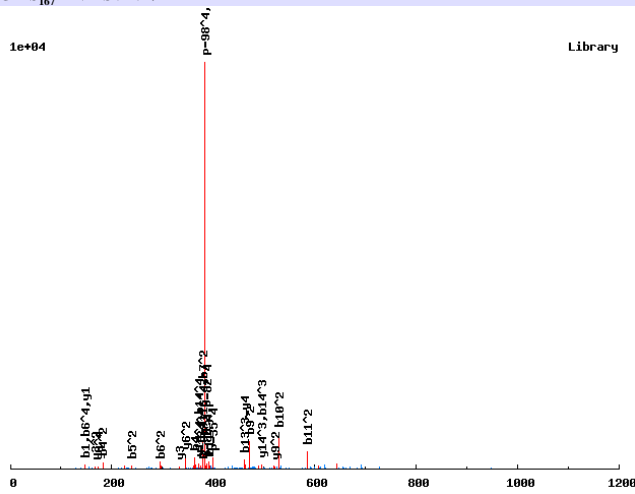

| Library | b <sup>1+</sup> | b <sup>2+</sup> | b <sup>3+</sup> | b <sup>4+</sup> | #         | AA            | #         | y <sup>1+</sup> | y <sup>2+</sup> | y <sup>3+</sup> | y <sup>4+</sup> |
|---------|-----------------|-----------------|-----------------|-----------------|-----------|---------------|-----------|-----------------|-----------------|-----------------|-----------------|
|         | <b>148.0427</b> | 74.5250         | 50.0191         | 37.7661         | <b>1</b>  | <b>M[147]</b> | <b>15</b> |                 |                 |                 |                 |
|         | 235.0747        | 118.0410        | 79.0298         | 59.5241         | <b>2</b>  | <b>S</b>      | <b>14</b> | 1482.7563       | 741.8818        | <b>494.9236</b> | <b>371.4445</b> |
|         | 306.1118        | 153.5595        | 102.7088        | 77.2834         | <b>3</b>  | <b>A</b>      | <b>13</b> | 1395.7243       | 698.3658        | 465.9130        | 349.6865        |
|         | <b>363.1333</b> | <b>182.0703</b> | 121.7159        | 91.5388         | <b>4</b>  | <b>G</b>      | <b>12</b> | 1324.6872       | 662.8472        | 442.2339        | 331.9273        |
|         | 478.1602        | <b>239.5837</b> | 160.0583        | 120.2955        | <b>5</b>  | <b>D</b>      | <b>11</b> | 1267.6657       | 634.3365        | 423.2268        | 317.6719        |
|         | 591.2443        | <b>296.1258</b> | 197.7529        | <b>148.5665</b> | <b>6</b>  | <b>I</b>      | <b>10</b> | 1152.6388       | 576.8230        | <b>384.8844</b> | 288.9152        |
|         | 758.2426        | <b>379.6250</b> | 253.4191        | 190.3161        | <b>7</b>  | <b>S[167]</b> | <b>9</b>  | 1039.5547       | <b>520.2810</b> | 347.1898        | 260.6441        |
|         | 829.2798        | 415.1435        | 277.0981        | 208.0754        | <b>8</b>  | <b>A</b>      | <b>8</b>  | 872.5564        | 436.7818        | 291.5236        | 218.8946        |
|         | 942.3638        | <b>471.6855</b> | 314.7928        | 236.3464        | <b>9</b>  | <b>I</b>      | <b>7</b>  | 801.5193        | 401.2633        | 267.8446        | 201.1353        |
|         | 1056.4067       | <b>528.7070</b> | 352.8071        | 264.8571        | <b>10</b> | <b>N</b>      | <b>6</b>  | 688.4352        | <b>344.7212</b> | 230.1499        | <b>172.8643</b> |
|         | 1169.4908       | <b>585.2490</b> | <b>390.5018</b> | 293.1282        | <b>11</b> | <b>I</b>      | <b>5</b>  | 574.3923        | 287.6998        | 192.1356        | 144.3535        |
|         | 1297.5858       | 649.2965        | 433.2001        | 325.1519        | <b>12</b> | <b>K</b>      | <b>4</b>  | <b>461.3082</b> | 231.1577        | 154.4409        | 116.0825        |
|         | 1384.6178       | 692.8125        | <b>462.2108</b> | 346.9099        | <b>13</b> | <b>S</b>      | <b>3</b>  | <b>333.2132</b> | <b>167.1103</b> | 111.7426        | 84.0588         |
|         | 1483.6862       | 742.3467        | <b>495.2336</b> | <b>371.6770</b> | <b>14</b> | <b>V</b>      | <b>2</b>  | 246.1812        | 123.5942        | 82.7319         | 62.3008         |
|         |                 |                 |                 |                 | <b>15</b> | <b>K</b>      | <b>1</b>  | <b>147.1128</b> | 74.0600         | 49.7091         | 37.5337         |

# Annotated spectra from Saleem et. al. 2009

R.MSDLS<sub>167</sub>LK<sub>136</sub>S<sub>167</sub>ETPASTK<sub>136</sub>N/2

0.7623

1e+04

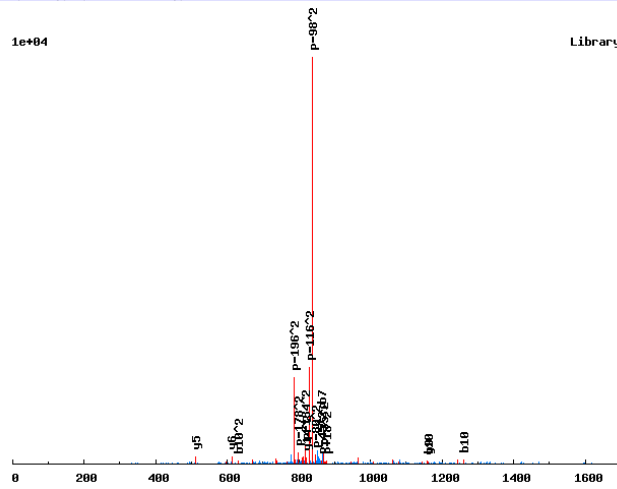

| Library | b <sup>1+</sup> | b <sup>2+</sup> | #  | AA     | #  | y <sup>1+</sup> | y <sup>2+</sup> |
|---------|-----------------|-----------------|----|--------|----|-----------------|-----------------|
|         | 132.0478        | 66.5275         | 1  | M      | 15 |                 |                 |
|         | 219.0798        | 110.0435        | 2  | S      | 14 | 1639.7198       | 820.3635        |
|         | 334.1067        | 167.5570        | 3  | D      | 13 | 1552.6878       | 776.8475        |
|         | 447.1908        | 224.0990        | 4  | L      | 12 | 1437.6608       | 719.3341        |
|         | 614.1892        | 307.5982        | 5  | S[167] | 11 | 1324.5768       | 662.7920        |
|         | 727.2732        | 364.1403        | 6  | L      | 10 | 1157.5784       | 579.2929        |
|         | 863.3824        | 432.1948        | 7  | K[136] | 9  | 1044.4944       | 522.7508        |
|         | 1030.3807       | 515.6940        | 8  | S[167] | 8  | 908.3852        | 454.6962        |
|         | 1159.4233       | 580.2153        | 9  | E      | 7  | 741.3868        | 371.1971        |
|         | 1260.4710       | 630.7391        | 10 | T      | 6  | 612.3443        | 306.6758        |
|         | 1357.5238       | 679.2655        | 11 | P      | 5  | 511.2966        | 256.1519        |
|         | 1428.5609       | 714.7841        | 12 | A      | 4  | 414.2438        | 207.6255        |
|         | 1515.5929       | 758.3001        | 13 | S      | 3  | 343.2067        | 172.1070        |
|         | 1616.6406       | 808.8239        | 14 | T      | 2  | 256.1747        | 128.5910        |
|         |                 |                 | 15 | K[136] | 1  | 155.1270        | 78.0671         |

# Annotated spectra from Saleem et. al. 2009

R.MS<sub>167</sub>PVLTT<sub>181</sub>PKR.H/2

0.7939

1e+04

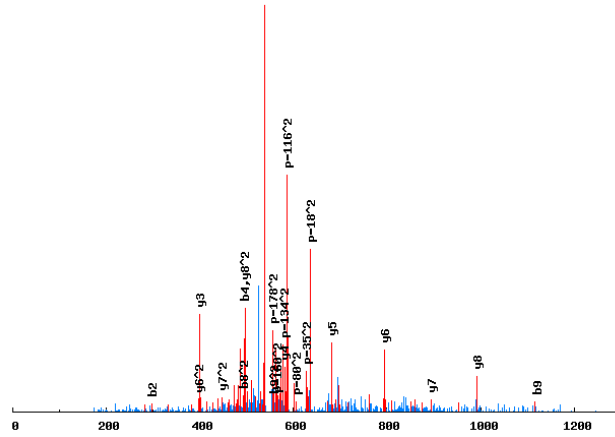

| Library | b <sup>1+</sup>  | b <sup>2+</sup> | #  | AA     | #  | y <sup>1+</sup> | y <sup>2+</sup> |
|---------|------------------|-----------------|----|--------|----|-----------------|-----------------|
|         | 132.0478         | 66.5275         | 1  | M      | 10 |                 |                 |
|         | <b>299.0461</b>  | 150.0267        | 2  | S[167] | 9  | 1158.5320       | 579.7696        |
|         | 396.0989         | 198.5531        | 3  | P      | 8  | <b>991.5336</b> | <b>496.2704</b> |
|         | <b>495.1673</b>  | 248.0873        | 4  | V      | 7  | <b>894.4808</b> | <b>447.7441</b> |
|         | 608.2514         | 304.6293        | 5  | L      | 6  | <b>795.4124</b> | <b>398.2099</b> |
|         | 709.2990         | 355.1532        | 6  | T      | 5  | <b>682.3284</b> | 341.6678        |
|         | 890.3131         | 445.6602        | 7  | T[181] | 4  | <b>581.2807</b> | 291.1440        |
|         | 987.3658         | <b>494.1865</b> | 8  | P      | 3  | <b>400.2667</b> | 200.6370        |
|         | <b>1115.4608</b> | <b>558.2340</b> | 9  | K      | 2  | 303.2139        | 152.1106        |
|         |                  |                 | 10 | R      | 1  | 175.1190        | 88.0631         |

# Annotated spectra from Saleem et. al. 2009

-MS<sub>167-167</sub>DEEDFNDIYGDDK<sub>136</sub>PITTEEVK<sub>136</sub>K<sub>136</sub>EEEQNK<sub>136</sub>A/3

0.9271

1e+04

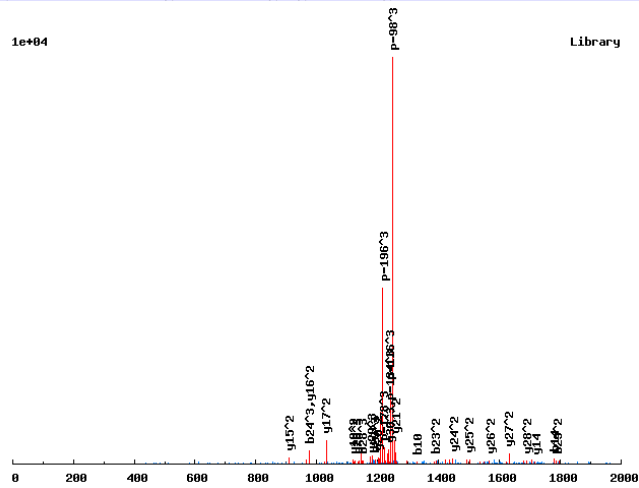

| Library | b <sup>1+</sup> | b <sup>2+</sup> | b <sup>3+</sup> | #  | AA     | #  | y <sup>1+</sup> | y <sup>2+</sup> | y <sup>3+</sup> |
|---------|-----------------|-----------------|-----------------|----|--------|----|-----------------|-----------------|-----------------|
|         | 132.0478        | 66.5275         | 44.6874         | 1  | M      | 31 |                 |                 |                 |
|         | 299.0461        | 150.0267        | 100.3536        | 2  | S[167] | 30 | 3711.5299       | 1856.2686       | 1237.8482       |
|         | 466.0445        | 233.5259        | 156.0197        | 3  | S[167] | 29 | 3544.5316       | 1772.7694       | 1182.1820       |
|         | 581.0714        | 291.0394        | 194.3620        | 4  | D      | 28 | 3377.5332       | 1689.2702       | 1126.5159       |
|         | 710.1140        | 355.5607        | 237.3762        | 5  | E      | 27 | 3262.5063       | 1631.7568       | 1088.1736       |
|         | 839.1566        | 420.0819        | 280.3904        | 6  | E      | 26 | 3133.4637       | 1567.2355       | 1045.1594       |
|         | 954.1836        | 477.5954        | 318.7327        | 7  | D      | 25 | 3004.4211       | 1502.7142       | 1002.1452       |
|         | 1101.2520       | 551.1296        | 367.7555        | 8  | F      | 24 | 2889.3942       | 1445.2007       | 963.8029        |
|         | 1215.2949       | 608.1511        | 405.7698        | 9  | N      | 23 | 2742.3257       | 1371.6665       | 914.7801        |
|         | 1330.3218       | 665.6646        | 444.1121        | 10 | D      | 22 | 2628.2828       | 1314.6450       | 876.7658        |
|         | 1443.4059       | 722.2066        | 481.8068        | 11 | I      | 21 | 2513.2559       | 1257.1316       | 838.4235        |
|         | 1606.4692       | 803.7383        | 536.1613        | 12 | Y      | 20 | 2400.1718       | 1200.5895       | 800.7288        |
|         | 1663.4907       | 832.2490        | 555.1684        | 13 | G      | 19 | 2237.1085       | 1119.0579       | 746.3743        |
|         | 1778.5176       | 889.7625        | 593.5107        | 14 | D      | 18 | 2180.0870       | 1090.5472       | 727.3672        |
|         | 1893.5446       | 947.2759        | 631.8530        | 15 | D      | 17 | 2065.0601       | 1033.0337       | 689.0249        |
|         | 2029.6537       | 1015.3305       | 677.2228        | 16 | K[136] | 16 | 1950.0331       | 975.5202        | 650.6826        |
|         | 2126.7065       | 1063.8569       | 709.5737        | 17 | P      | 15 | 1813.9240       | 907.4656        | 605.3128        |
|         | 2227.7542       | 1114.3807       | 743.2562        | 18 | T      | 14 | 1716.8712       | 858.9393        | 572.9619        |
|         | 2328.8018       | 1164.9046       | 776.9388        | 19 | T      | 13 | 1615.8235       | 808.4154        | 539.2794        |
|         | 2429.8495       | 1215.4284       | 810.6214        | 20 | T      | 12 | 1514.7759       | 757.8916        | 505.5968        |
|         | 2558.8921       | 1279.9497       | 853.6356        | 21 | E      | 11 | 1413.7282       | 707.3677        | 471.9142        |
|         | 2687.9347       | 1344.4710       | 896.6498        | 22 | E      | 10 | 1284.6856       | 642.8464        | 428.9001        |
|         | 2787.0031       | 1394.0052       | 929.6726        | 23 | V      | 9  | 1155.6430       | 578.3251        | 385.8859        |
|         | 2923.1123       | 1462.0598       | 975.0423        | 24 | K[136] | 8  | 1056.5746       | 528.7909        | 352.8631        |
|         | 3059.2214       | 1530.1144       | 1020.4120       | 25 | K[136] | 7  | 920.4654        | 460.7364        | 307.4933        |
|         | 3188.2640       | 1594.6356       | 1063.4262       | 26 | E      | 6  | 784.3563        | 392.6818        | 262.1236        |
|         | 3317.3066       | 1659.1569       | 1106.4404       | 27 | E      | 5  | 655.3137        | 328.1605        | 219.1094        |
|         | 3446.3492       | 1723.6782       | 1149.4546       | 28 | E      | 4  | 526.2711        | 263.6392        | 176.0952        |
|         | 3574.4078       | 1787.7075       | 1192.1408       | 29 | Q      | 3  | 397.2285        | 199.1179        | 133.0810        |
|         | 3688.4507       | 1844.7290       | 1230.1551       | 30 | N      | 2  | 269.1699        | 135.0886        | 90.3948         |
|         |                 |                 |                 | 31 | K[136] | 1  | 155.1270        | 78.0671         | 52.3805         |

# Annotated spectra from Saleem et. al. 2009

R.MSS<sub>167</sub>DTT<sub>181</sub>IDK<sub>136</sub>GPSHLFK<sub>136</sub>K/3

0.9876

1e+04

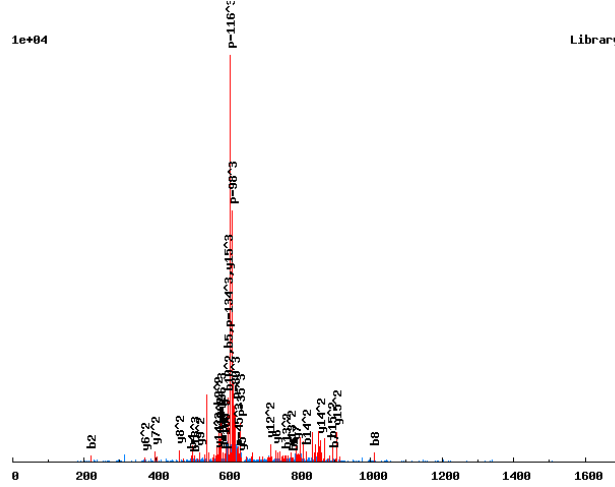

| Library | b <sup>1+</sup> | b <sup>2+</sup> | b <sup>3+</sup> | #  | AA     | #  | y <sup>1+</sup> | y <sup>2+</sup> | y <sup>3+</sup> |
|---------|-----------------|-----------------|-----------------|----|--------|----|-----------------|-----------------|-----------------|
|         | 132.0478        | 66.5275         | 44.6874         | 1  | M      | 16 |                 |                 |                 |
|         | 219.0798        | 110.0435        | 73.6981         | 2  | S      | 15 | 1808.7838       | 904.8955        | 603.5995        |
|         | 386.0782        | 193.5427        | 129.3642        | 3  | S[167] | 14 | 1721.7518       | 861.3795        | 574.5888        |
|         | 501.1051        | 251.0562        | 167.7066        | 4  | D      | 13 | 1554.7534       | 777.8803        | 518.9227        |
|         | 602.1528        | 301.5800        | 201.3891        | 5  | T      | 12 | 1439.7265       | 720.3669        | 480.5803        |
|         | 783.1668        | 392.0870        | 261.7271        | 6  | T[181] | 11 | 1338.6788       | 669.8430        | 446.8978        |
|         | 896.2509        | 448.6291        | 299.4218        | 7  | I      | 10 | 1157.6648       | 579.3360        | 386.5598        |
|         | 1011.2778       | 506.1425        | 337.7641        | 8  | D      | 9  | 1044.5807       | 522.7940        | 348.8651        |
|         | 1147.3870       | 574.1971        | 383.1338        | 9  | K[136] | 8  | 929.5538        | 465.2805        | 310.5228        |
|         | 1204.4084       | 602.7078        | 402.1410        | 10 | G      | 7  | 793.4446        | 397.2260        | 265.1531        |
|         | 1301.4612       | 651.2342        | 434.4919        | 11 | P      | 6  | 736.4232        | 368.7152        | 246.1459        |
|         | 1388.4932       | 694.7502        | 463.5026        | 12 | S      | 5  | 639.3704        | 320.1888        | 213.7950        |
|         | 1525.5521       | 763.2797        | 509.1889        | 13 | H      | 4  | 552.3384        | 276.6728        | 184.7843        |
|         | 1638.6362       | 819.8217        | 546.8836        | 14 | L      | 3  | 415.2795        | 208.1434        | 139.0980        |
|         | 1785.7046       | 893.3559        | 595.9064        | 15 | F      | 2  | 302.1954        | 151.6013        | 101.4033        |
|         |                 |                 |                 | 16 | K[136] | 1  | 155.1270        | 78.0671         | 52.3805         |

# Annotated spectra from Saleem et. al. 2009

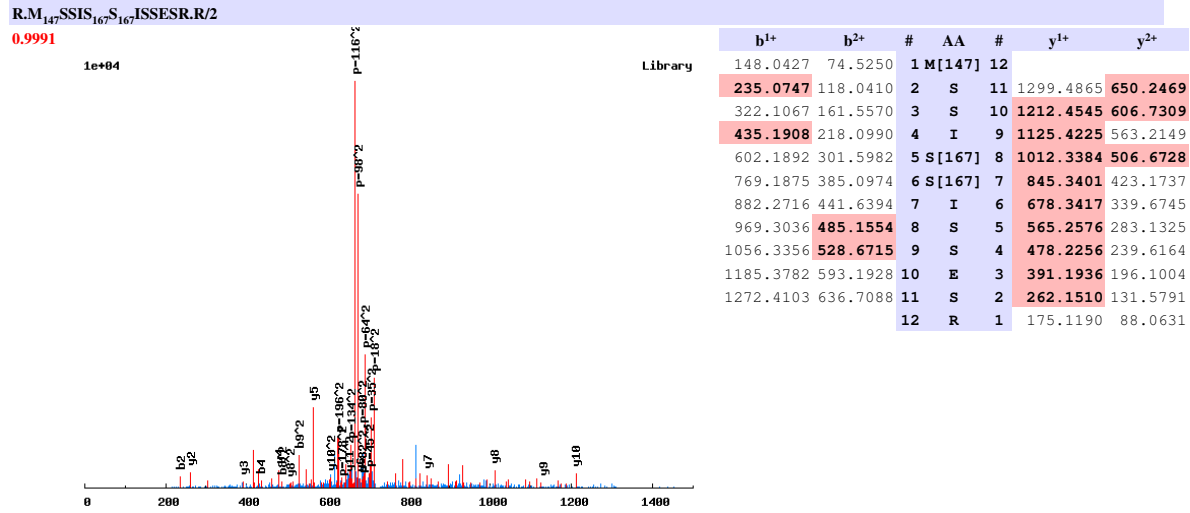

# Annotated spectra from Saleem et. al. 2009

R.MSS<sub>167</sub>PLHRLS<sub>167</sub>PTGK.S/3

0.8916

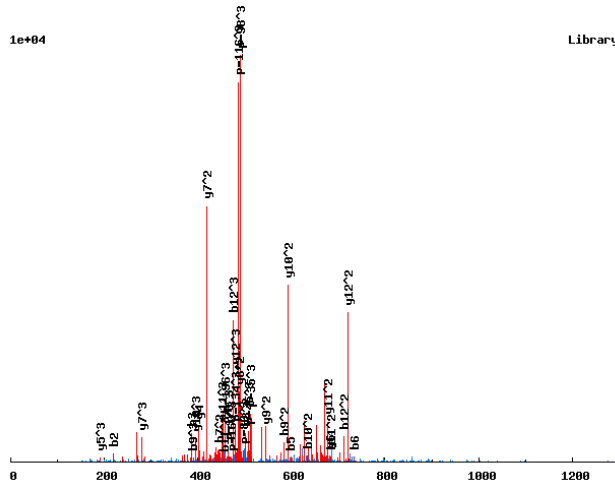

| Library | b <sup>1+</sup> | b <sup>2+</sup> | b <sup>3+</sup> | #  | AA     | #  | y <sup>1+</sup> | y <sup>2+</sup> | y <sup>3+</sup> |
|---------|-----------------|-----------------|-----------------|----|--------|----|-----------------|-----------------|-----------------|
|         | 132.0478        | 66.5275         | 44.6874         | 1  | M      | 13 |                 |                 |                 |
|         | 219.0798        | 110.0435        | 73.6981         | 2  | S      | 12 | 1439.6444       | 720.3258        | 480.5530        |
|         | 386.0782        | 193.5427        | 129.3642        | 3  | S[167] | 11 | 1352.6123       | 676.8098        | 451.5423        |
|         | 483.1309        | 242.0691        | 161.7152        | 4  | P      | 10 | 1185.6140       | 593.3106        | 395.8762        |
|         | 596.2150        | 298.6111        | 199.4098        | 5  | L      | 9  | 1088.5612       | 544.7842        | 363.5253        |
|         | 733.2739        | 367.1406        | 245.0962        | 6  | H      | 8  | 975.4771        | 488.2422        | 325.8306        |
|         | 889.3750        | 445.1911        | 297.1299        | 7  | R      | 7  | 838.4182        | 419.7128        | 280.1443        |
|         | 1002.4591       | 501.7332        | 334.8245        | 8  | L      | 6  | 682.3171        | 341.6622        | 228.1106        |
|         | 1169.4574       | 585.2324        | 390.4907        | 9  | S[167] | 5  | 569.2331        | 285.1202        | 190.4159        |
|         | 1266.5102       | 633.7587        | 422.8416        | 10 | P      | 4  | 402.2347        | 201.6210        | 134.7498        |
|         | 1367.5579       | 684.2826        | 456.5241        | 11 | T      | 3  | 305.1819        | 153.0946        | 102.3988        |
|         | 1424.5793       | 712.7933        | 475.5313        | 12 | G      | 2  | 204.1343        | 102.5708        | 68.7163         |
|         |                 |                 |                 | 13 | K      | 1  | 147.1128        | 74.0600         | 49.7091         |



# Annotated spectra from Saleem et. al. 2009

K.NADANLGVEK<sub>136</sub>IDS<sub>167</sub>NDSS<sub>167</sub>EDGSK<sub>136</sub>K<sub>136</sub>S/3

0.9936

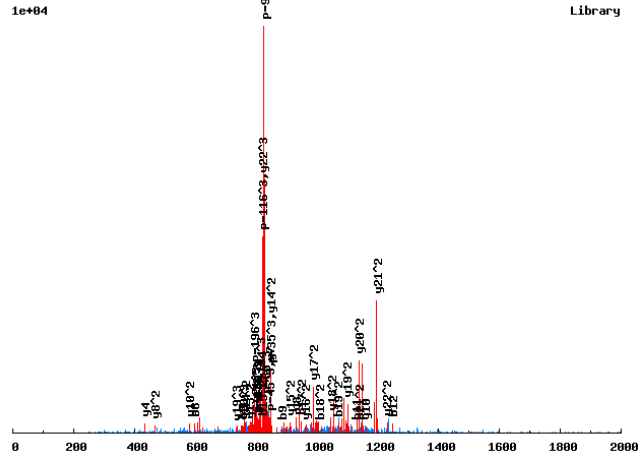

| Library | b <sup>1+</sup> | b <sup>2+</sup> | b <sup>3+</sup> | #  | AA     | #  | y <sup>1+</sup> | y <sup>2+</sup> | y <sup>3+</sup> |
|---------|-----------------|-----------------|-----------------|----|--------|----|-----------------|-----------------|-----------------|
|         | 115.0502        | 58.0287         | 39.0216         | 1  | N      | 23 |                 |                 |                 |
|         | 186.0873        | 93.5473         | 62.7006         | 2  | A      | 22 | 2463.0386       | 1232.0229       | 821.6844        |
|         | 301.1143        | 151.0608        | 101.0429        | 3  | D      | 21 | 2392.0015       | 1196.5044       | 798.0053        |
|         | 372.1514        | 186.5793        | 124.7220        | 4  | A      | 20 | 2276.9745       | 1138.9909       | 759.6630        |
|         | 486.1943        | 243.6008        | 162.7363        | 5  | N      | 19 | 2205.9374       | 1103.4723       | 735.9840        |
|         | 599.2784        | 300.1428        | 200.4310        | 6  | L      | 18 | 2091.8945       | 1046.4509       | 697.9697        |
|         | 656.2998        | 328.6536        | 219.4381        | 7  | G      | 17 | 1978.8104       | 989.9088        | 660.2750        |
|         | 755.3682        | 378.1878        | 252.4609        | 8  | V      | 16 | 1921.7890       | 961.3981        | 641.2678        |
|         | 884.4108        | 442.7091        | 295.4751        | 9  | E      | 15 | 1822.7205       | 911.8639        | 608.2450        |
|         | 1020.5200       | 510.7636        | 340.8448        | 10 | K[136] | 14 | 1693.6780       | 847.3426        | 565.2308        |
|         | 1133.6040       | 567.3057        | 378.5395        | 11 | I      | 13 | 1557.5688       | 779.2880        | 519.8611        |
|         | 1248.6310       | 624.8191        | 416.8818        | 12 | D      | 12 | 1444.4847       | 722.7460        | 482.1664        |
|         | 1415.6293       | 708.3183        | 472.5480        | 13 | S[167] | 11 | 1329.4578       | 665.2325        | 443.8241        |
|         | 1529.6723       | 765.3398        | 510.5623        | 14 | N      | 10 | 1162.4594       | 581.7334        | 388.1580        |
|         | 1644.6992       | 822.8532        | 548.9046        | 15 | D      | 9  | 1048.4165       | 524.7119        | 350.1437        |
|         | 1731.7312       | 866.3693        | 577.9153        | 16 | S      | 8  | 933.3896        | 467.1984        | 311.8014        |
|         | 1898.7296       | 949.8684        | 633.5814        | 17 | S[167] | 7  | 846.3575        | 423.6824        | 282.7907        |
|         | 2027.7722       | 1014.3897       | 676.5956        | 18 | E      | 6  | 679.3592        | 340.1832        | 227.1246        |
|         | 2142.7991       | 1071.9032       | 714.9379        | 19 | D      | 5  | 550.3166        | 275.6619        | 184.1104        |
|         | 2199.8206       | 1100.4139       | 733.9451        | 20 | G      | 4  | 435.2896        | 218.1485        | 145.7681        |
|         | 2286.8526       | 1143.9300       | 762.9557        | 21 | S      | 3  | 378.2682        | 189.6377        | 126.7609        |
|         | 2422.9618       | 1211.9845       | 808.3254        | 22 | K[136] | 2  | 291.2362        | 146.1217        | 97.7502         |
|         |                 |                 |                 | 23 | K[136] | 1  | 155.1270        | 78.0671         | 52.3805         |

Annotated spectra from Saleem et. al. 2009

K.NADGLS<sub>167</sub>GTT<sub>181</sub>THEENNVGVNEEK<sub>136</sub>-A/2

0.9997

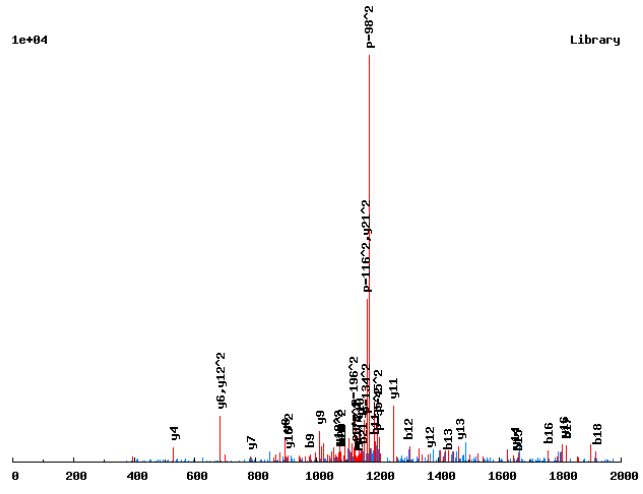

| Library | b <sup>1+</sup> | b <sup>2+</sup> | #  | AA     | #  | y <sup>1+</sup> | y <sup>2+</sup> |
|---------|-----------------|-----------------|----|--------|----|-----------------|-----------------|
|         | 115.0502        | 58.0287         | 1  | N      | 22 |                 |                 |
|         | 186.0873        | 93.5473         | 2  | A      | 21 | 2329.0087       | 1165.0080       |
|         | 301.1143        | 151.0608        | 3  | D      | 20 | 2257.9716       | 1129.4894       |
|         | 358.1357        | 179.5715        | 4  | G      | 19 | 2142.9447       | 1071.9760       |
|         | 471.2198        | 236.1135        | 5  | L      | 18 | 2085.9232       | 1043.4652       |
|         | 638.2181        | 319.6127        | 6  | S[167] | 17 | 1972.8392       | 986.9232        |
|         | 695.2396        | 348.1234        | 7  | G      | 16 | 1805.8408       | 903.4240        |
|         | 796.2873        | 398.6473        | 8  | T      | 15 | 1748.8193       | 874.9133        |
|         | 977.3013        | 489.1543        | 9  | T[181] | 14 | 1647.7716       | 824.3895        |
|         | 1078.3490       | 539.6781        | 10 | T      | 13 | 1466.7576       | 733.8825        |
|         | 1191.4330       | 596.2202        | 11 | I      | 12 | 1365.7100       | 683.3586        |
|         | 1304.5171       | 652.7622        | 12 | I      | 11 | 1252.6259       | 626.8166        |
|         | 1433.5597       | 717.2835        | 13 | E      | 10 | 1139.5418       | 570.2746        |
|         | 1547.6026       | 774.3049        | 14 | N      | 9  | 1010.4992       | 505.7533        |
|         | 1661.6455       | 831.3264        | 15 | N      | 8  | 896.4563        | 448.7318        |
|         | 1760.7140       | 880.8606        | 16 | V      | 7  | 782.4134        | 391.7103        |
|         | 1817.7354       | 909.3713        | 17 | G      | 6  | 683.3450        | 342.1761        |
|         | 1916.8038       | 958.9056        | 18 | V      | 5  | 626.3235        | 313.6654        |
|         | 2030.8468       | 1015.9270       | 19 | N      | 4  | 527.2551        | 264.1312        |
|         | 2159.8893       | 1080.4483       | 20 | E      | 3  | 413.2122        | 207.1097        |
|         | 2288.9319       | 1144.9696       | 21 | E      | 2  | 284.1696        | 142.5884        |
|         |                 |                 | 22 | K[136] | 1  | 155.1270        | 78.0671         |

# Annotated spectra from Saleem et. al. 2009

K.NANDPENVGERS<sub>167</sub>DLSS<sub>167</sub>DRK.M3

0.7313

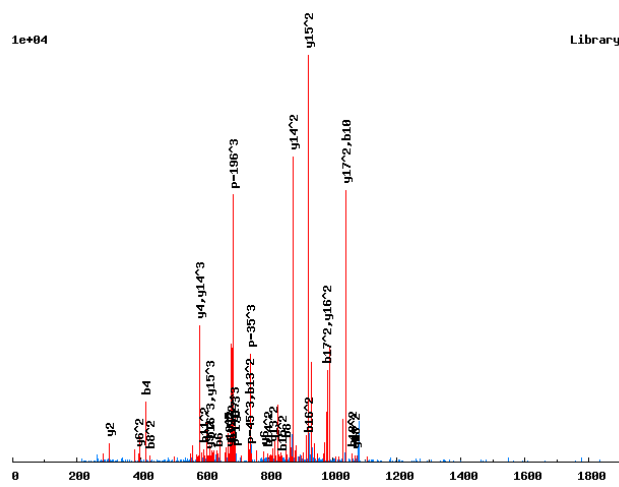

| Library | b <sup>1+</sup> | b <sup>2+</sup> | b <sup>3+</sup> | #  | AA     | #  | y <sup>1+</sup> | y <sup>2+</sup> | y <sup>3+</sup> |
|---------|-----------------|-----------------|-----------------|----|--------|----|-----------------|-----------------|-----------------|
|         | 115.0502        | 58.0287         | 39.0216         | 1  | N      | 19 |                 |                 |                 |
|         | 186.0873        | 93.5473         | 62.7006         | 2  | A      | 18 | 2148.8594       | 1074.9334       | 716.9580        |
|         | 300.1302        | 150.5688        | 100.7149        | 3  | N      | 17 | 2077.8223       | 1039.4148       | 693.2790        |
|         | 415.1572        | 208.0822        | 139.0572        | 4  | D      | 16 | 1963.7794       | 982.3933        | 655.2647        |
|         | 512.2100        | 256.6086        | 171.4082        | 5  | P      | 15 | 1848.7525       | 924.8799        | 616.9223        |
|         | 641.2525        | 321.1299        | 214.4224        | 6  | E      | 14 | 1751.6997       | 876.3535        | 584.5714        |
|         | 755.2955        | 378.1514        | 252.4367        | 7  | N      | 13 | 1622.6571       | 811.8322        | 541.5572        |
|         | 854.3639        | 427.6856        | 285.4595        | 8  | V      | 12 | 1508.6142       | 754.8107        | 503.5429        |
|         | 911.3853        | 456.1963        | 304.4666        | 9  | G      | 11 | 1409.5458       | 705.2765        | 470.5201        |
|         | 1040.4279       | 520.7176        | 347.4808        | 10 | E      | 10 | 1352.5243       | 676.7658        | 451.5130        |
|         | 1196.5290       | 598.7682        | 399.5145        | 11 | R      | 9  | 1223.4817       | 612.2445        | 408.4988        |
|         | 1363.5274       | 682.2673        | 455.1807        | 12 | S[167] | 8  | 1067.3806       | 534.1939        | 356.4651        |
|         | 1478.5543       | 739.7808        | 493.5230        | 13 | D      | 7  | 900.3822        | 450.6948        | 300.7989        |
|         | 1591.6384       | 796.3228        | 531.2177        | 14 | L      | 6  | 785.3553        | 393.1813        | 262.4566        |
|         | 1678.6704       | 839.8389        | 560.2283        | 15 | S      | 5  | 672.2712        | 336.6393        | 224.7619        |
|         | 1845.6688       | 923.3380        | 615.8945        | 16 | S[167] | 4  | 585.2392        | 293.1232        | 195.7513        |
|         | 1960.6957       | 980.8515        | 654.2368        | 17 | D      | 3  | 418.2409        | 209.6241        | 140.0851        |
|         | 2116.7968       | 1058.9021       | 706.2705        | 18 | R      | 2  | 303.2139        | 152.1106        | 101.7428        |
|         |                 |                 |                 | 19 | K      | 1  | 147.1128        | 74.0600         | 49.7091         |

# Annotated spectra from Saleem et. al. 2009

K.NANDPENVGERS<sub>167</sub>DLS<sub>167</sub>S<sub>167</sub>DRK.M/3

0.6207

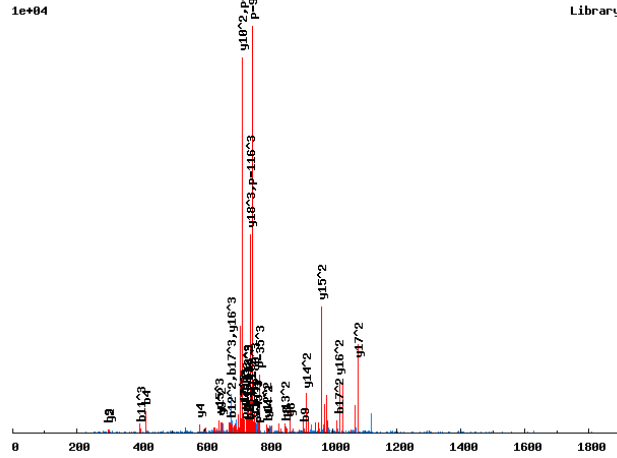

| Library | b <sup>1+</sup> | b <sup>2+</sup> | b <sup>3+</sup> | #  | AA     | #  | y <sup>1+</sup> | y <sup>2+</sup> | y <sup>3+</sup> |
|---------|-----------------|-----------------|-----------------|----|--------|----|-----------------|-----------------|-----------------|
|         | 115.0502        | 58.0287         | 39.0216         | 1  | N      | 19 |                 |                 |                 |
|         | 186.0873        | 93.5473         | 62.7006         | 2  | A      | 18 | 2228.8258       | 1114.9165       | 743.6134        |
|         | 300.1302        | 150.5688        | 100.7149        | 3  | N      | 17 | 2157.7887       | 1079.3980       | 719.9344        |
|         | 415.1572        | 208.0822        | 139.0572        | 4  | D      | 16 | 2043.7457       | 1022.3765       | 681.9201        |
|         | 512.2100        | 256.6086        | 171.4082        | 5  | P      | 15 | 1928.7188       | 964.8630        | 643.5778        |
|         | 641.2525        | 321.1299        | 214.4224        | 6  | E      | 14 | 1831.6660       | 916.3367        | 611.2269        |
|         | 755.2955        | 378.1514        | 252.4367        | 7  | N      | 13 | 1702.6234       | 851.8154        | 568.2127        |
|         | 854.3639        | 427.6856        | 285.4595        | 8  | V      | 12 | 1588.5805       | 794.7939        | 530.1984        |
|         | 911.3853        | 456.1963        | 304.4666        | 9  | G      | 11 | 1489.5121       | 745.2597        | 497.1756        |
|         | 1040.4279       | 520.7176        | 347.4808        | 10 | E      | 10 | 1432.4906       | 716.7490        | 478.1684        |
|         | 1196.5290       | 598.7682        | 399.5145        | 11 | R      | 9  | 1303.4480       | 652.2277        | 435.1542        |
|         | 1363.5274       | 682.2673        | 455.1807        | 12 | S[167] | 8  | 1147.3469       | 574.1771        | 383.1205        |
|         | 1478.5543       | 739.7808        | 493.5230        | 13 | D      | 7  | 980.3486        | 490.6779        | 327.4544        |
|         | 1591.6384       | 796.3228        | 531.2177        | 14 | L      | 6  | 865.3216        | 433.1645        | 289.1121        |
|         | 1758.6368       | 879.8220        | 586.8838        | 15 | S[167] | 5  | 752.2376        | 376.6224        | 251.4174        |
|         | 1925.6351       | 963.3212        | 642.5499        | 16 | S[167] | 4  | 585.2392        | 293.1232        | 195.7513        |
|         | 2040.6621       | 1020.8347       | 680.8922        | 17 | D      | 3  | 418.2409        | 209.6241        | 140.0851        |
|         | 2196.7632       | 1098.8852       | 732.9259        | 18 | R      | 2  | 303.2139        | 152.1106        | 101.7428        |
|         |                 |                 |                 | 19 | K      | 1  | 147.1128        | 74.0600         | 49.7091         |

# Annotated spectra from Saleem et. al. 2009

R.NANDTDSAS<sub>167</sub>HLS<sub>167</sub>AGTHHSK.F/3

0.9439

1e+04

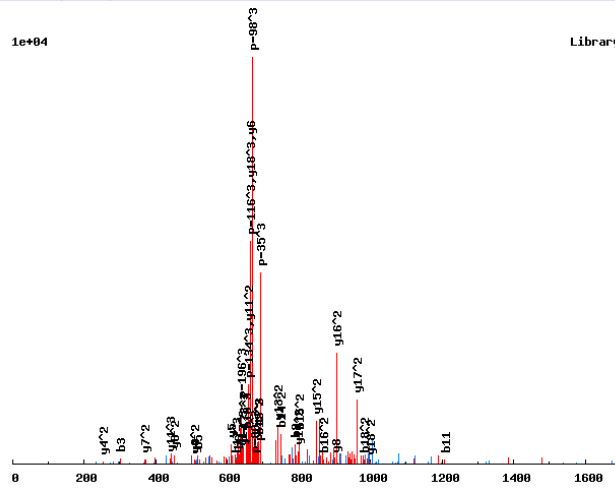

| Library | b <sup>1+</sup> | b <sup>2+</sup> | b <sup>3+</sup> | #  | AA     | #  | y <sup>1+</sup> | y <sup>2+</sup> | y <sup>3+</sup> |
|---------|-----------------|-----------------|-----------------|----|--------|----|-----------------|-----------------|-----------------|
|         | 115.0502        | 58.0287         | 39.0216         | 1  | N      | 19 |                 |                 |                 |
|         | 186.0873        | 93.5473         | 62.7006         | 2  | A      | 18 | 1995.7593       | 998.3833        | 665.9246        |
|         | 300.1302        | 150.5688        | 100.7149        | 3  | N      | 17 | 1924.7222       | 962.8648        | 642.2456        |
|         | 415.1572        | 208.0822        | 139.0572        | 4  | D      | 16 | 1810.6793       | 905.8433        | 604.2313        |
|         | 516.2049        | 258.6061        | 172.7398        | 5  | T      | 15 | 1695.6524       | 848.3298        | 565.8890        |
|         | 631.2318        | 316.1195        | 211.0821        | 6  | D      | 14 | 1594.6047       | 797.8060        | 532.2064        |
|         | 718.2638        | 359.6356        | 240.0928        | 7  | S      | 13 | 1479.5777       | 740.2925        | 493.8641        |
|         | 789.3009        | 395.1541        | 263.7718        | 8  | A      | 12 | 1392.5457       | 696.7765        | 464.8534        |
|         | 956.2993        | 478.6533        | 319.4380        | 9  | S[167] | 11 | 1321.5086       | 661.2579        | 441.1744        |
|         | 1093.3582       | 547.1828        | 365.1243        | 10 | H      | 10 | 1154.5102       | 577.7588        | 385.5083        |
|         | 1206.4423       | 603.7248        | 402.8189        | 11 | L      | 9  | 1017.4513       | 509.2293        | 339.8220        |
|         | 1373.4406       | 687.2240        | 458.4851        | 12 | S[167] | 8  | 904.3673        | 452.6873        | 302.1273        |
|         | 1444.4778       | 722.7425        | 482.1641        | 13 | A      | 7  | 737.3689        | 369.1881        | 246.4612        |
|         | 1501.4992       | 751.2532        | 501.1713        | 14 | G      | 6  | 666.3318        | 333.6695        | 222.7821        |
|         | 1602.5469       | 801.7771        | 534.8538        | 15 | T      | 5  | 609.3103        | 305.1588        | 203.7750        |
|         | 1739.6058       | 870.3065        | 580.5401        | 16 | H      | 4  | 508.2627        | 254.6350        | 170.0924        |
|         | 1876.6647       | 938.8360        | 626.2264        | 17 | H      | 3  | 371.2037        | 186.1055        | 124.4061        |
|         | 1963.6967       | 982.3520        | 655.2371        | 18 | S      | 2  | 234.1448        | 117.5761        | 78.7198         |
|         |                 |                 |                 | 19 | K      | 1  | 147.1128        | 74.0600         | 49.7091         |

# Annotated spectra from Saleem et. al. 2009

K.NANPYASMANDSY<sub>243</sub>S<sub>167</sub>NGNLNR.S/3

0.6616

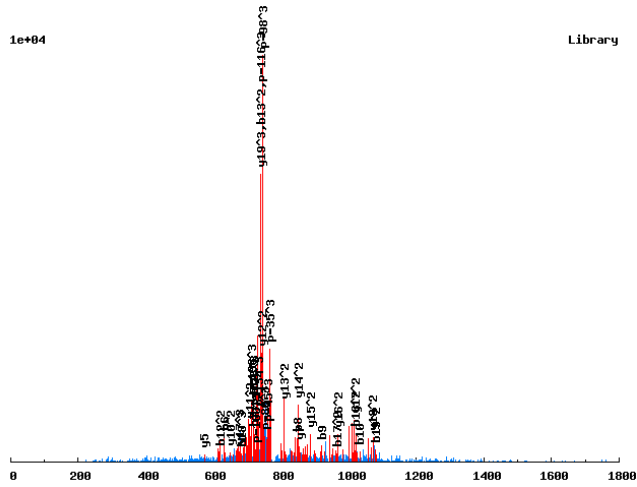

| Library | b <sup>1+</sup>  | b <sup>2+</sup>  | b <sup>3+</sup> | #  | AA     | #  | y <sup>1+</sup> | y <sup>2+</sup>  | y <sup>3+</sup> |
|---------|------------------|------------------|-----------------|----|--------|----|-----------------|------------------|-----------------|
|         | 115.0502         | 58.0287          | 39.0216         | 1  | N      | 20 |                 |                  |                 |
|         | 186.0873         | 93.5473          | 62.7006         | 2  | A      | 19 | 2218.8261       | 1109.9167        | <b>740.2802</b> |
|         | 300.1302         | 150.5688         | 100.7149        | 3  | N      | 18 | 2147.7889       | <b>1074.3981</b> | 716.6012        |
|         | 397.1830         | 199.0951         | 133.0659        | 4  | P      | 17 | 2033.7460       | <b>1017.3766</b> | <b>678.5869</b> |
|         | 560.2463         | 280.6268         | 187.4203        | 5  | Y      | 16 | 1936.6933       | <b>968.8503</b>  | 646.2359        |
|         | <b>631.2835</b>  | 316.1454         | 211.0993        | 6  | A      | 15 | 1773.6299       | <b>887.3186</b>  | 591.8815        |
|         | <b>718.3155</b>  | 359.6614         | 240.1100        | 7  | S      | 14 | 1702.5928       | <b>851.8000</b>  | 568.2025        |
|         | <b>849.3560</b>  | 425.1816         | 283.7902        | 8  | M      | 13 | 1615.5608       | <b>808.2840</b>  | 539.1918        |
|         | <b>920.3931</b>  | 460.7002         | 307.4692        | 9  | A      | 12 | 1484.5203       | <b>742.7638</b>  | 495.5116        |
|         | <b>1034.4360</b> | 517.7216         | 345.4835        | 10 | N      | 11 | 1413.4832       | <b>707.2452</b>  | 471.8326        |
|         | 1149.4630        | 575.2351         | 383.8258        | 11 | D      | 10 | 1299.4403       | <b>650.2238</b>  | 433.8183        |
|         | 1236.4950        | <b>618.7511</b>  | 412.8365        | 12 | S      | 9  | 1184.4133       | 592.7103         | 395.4760        |
|         | 1479.5246        | <b>740.2660</b>  | 493.8464        | 13 | Y[243] | 8  | 1097.3813       | 549.1943         | 366.4653        |
|         | 1646.5230        | 823.7651         | 549.5125        | 14 | S[167] | 7  | <b>854.3516</b> | 427.6795         | 285.4554        |
|         | 1760.5659        | 880.7866         | 587.5268        | 15 | N      | 6  | 687.3533        | 344.1803         | 229.7893        |
|         | 1817.5874        | 909.2973         | 606.5340        | 16 | G      | 5  | <b>573.3103</b> | 287.1588         | 191.7750        |
|         | 1931.6303        | <b>966.3188</b>  | 644.5483        | 17 | N      | 4  | 516.2889        | 258.6481         | 172.7678        |
|         | 2044.7144        | <b>1022.8608</b> | <b>682.2430</b> | 18 | L      | 3  | 402.2459        | 201.6266         | 134.7535        |
|         | 2158.7573        | <b>1079.8823</b> | <b>720.2573</b> | 19 | N      | 2  | 289.1619        | 145.0846         | 97.0588         |
|         |                  |                  |                 | 20 | R      | 1  | 175.1190        | 88.0631          | 59.0445         |

# Annotated spectra from Saleem et. al. 2009

R.NAPLDSKDENFAS<sub>167</sub>VS<sub>167</sub>PAGPSSVHNAK.N/3

0.9516

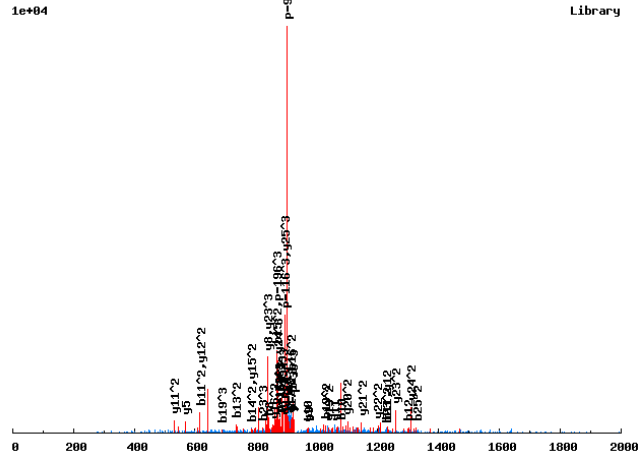

| Library | b <sup>1+</sup> | b <sup>2+</sup> | b <sup>3+</sup> | #  | AA     | #  | y <sup>1+</sup> | y <sup>2+</sup> | y <sup>3+</sup> |
|---------|-----------------|-----------------|-----------------|----|--------|----|-----------------|-----------------|-----------------|
|         | 115.0502        | 58.0287         | 39.0216         | 1  | N      | 26 |                 |                 |                 |
|         | 186.0873        | 93.5473         | 62.7006         | 2  | A      | 25 | 2685.1593       | 1343.0833       | 895.7246        |
|         | 283.1401        | 142.0737        | 95.0515         | 3  | P      | 24 | 2614.1222       | 1307.5647       | 872.0456        |
|         | 396.2241        | 198.6157        | 132.7462        | 4  | L      | 23 | 2517.0694       | 1259.0383       | 839.6947        |
|         | 511.2511        | 256.1292        | 171.0885        | 5  | D      | 22 | 2403.9854       | 1202.4963       | 802.0000        |
|         | 598.2831        | 299.6452        | 200.0992        | 6  | S      | 21 | 2288.9584       | 1144.9828       | 763.6577        |
|         | 726.3781        | 363.6927        | 242.7975        | 7  | K      | 20 | 2201.9264       | 1101.4668       | 734.6470        |
|         | 841.4050        | 421.2061        | 281.1399        | 8  | D      | 19 | 2073.8314       | 1037.4194       | 691.9487        |
|         | 970.4476        | 485.7274        | 324.1541        | 9  | E      | 18 | 1958.8045       | 979.9059        | 653.6063        |
|         | 1084.4905       | 542.7489        | 362.1684        | 10 | N      | 17 | 1829.7619       | 915.3846        | 610.5922        |
|         | 1231.5589       | 616.2831        | 411.1912        | 11 | F      | 16 | 1715.7190       | 858.3631        | 572.5778        |
|         | 1302.5961       | 651.8017        | 434.8702        | 12 | A      | 15 | 1568.6506       | 784.8289        | 523.5550        |
|         | 1469.5944       | 735.3008        | 490.5363        | 13 | S[167] | 14 | 1497.6134       | 749.3104        | 499.8760        |
|         | 1568.6628       | 784.8351        | 523.5591        | 14 | V      | 13 | 1330.6151       | 665.8112        | 444.2099        |
|         | 1735.6612       | 868.3342        | 579.2252        | 15 | S[167] | 12 | 1231.5467       | 616.2770        | 411.1871        |
|         | 1832.7139       | 916.8606        | 611.5762        | 16 | P      | 11 | 1064.5483       | 532.7778        | 355.5210        |
|         | 1903.7511       | 952.3792        | 635.2552        | 17 | A      | 10 | 967.4956        | 484.2514        | 323.1700        |
|         | 1960.7725       | 980.8899        | 654.2624        | 18 | G      | 9  | 896.4584        | 448.7329        | 299.4910        |
|         | 2057.8253       | 1029.4163       | 686.6133        | 19 | P      | 8  | 839.4370        | 420.2221        | 280.4838        |
|         | 2144.8573       | 1072.9323       | 715.6240        | 20 | S      | 7  | 742.3842        | 371.6958        | 248.1329        |
|         | 2231.8893       | 1116.4483       | 744.6346        | 21 | S      | 6  | 655.3522        | 328.1797        | 219.1223        |
|         | 2330.9577       | 1165.9825       | 777.6574        | 22 | V      | 5  | 568.3202        | 284.6637        | 190.1116        |
|         | 2468.0167       | 1234.5120       | 823.3437        | 23 | H      | 4  | 469.2517        | 235.1295        | 157.0888        |
|         | 2582.0596       | 1291.5334       | 861.3580        | 24 | N      | 3  | 332.1928        | 166.6001        | 111.4025        |
|         | 2653.0967       | 1327.0520       | 885.0371        | 25 | A      | 2  | 218.1499        | 109.5786        | 73.3882         |
|         |                 |                 |                 | 26 | K      | 1  | 147.1128        | 74.0600         | 49.7091         |

# Annotated spectra from Saleem et. al. 2009

R.NAS<sub>167</sub>IESK<sub>136</sub>T<sub>181</sub>GLAGNQATNGK<sub>136</sub>T/3

0.9927

1e+04

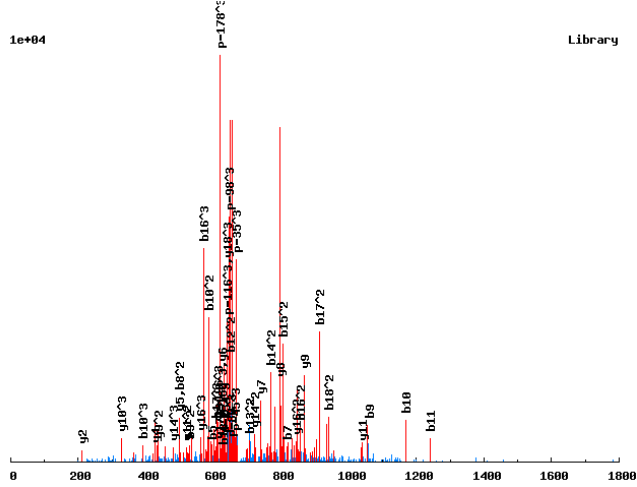

| Library | b <sup>1+</sup> | b <sup>2+</sup> | b <sup>3+</sup> | #  | AA     | #  | y <sup>1+</sup> | y <sup>2+</sup> | y <sup>3+</sup> |
|---------|-----------------|-----------------|-----------------|----|--------|----|-----------------|-----------------|-----------------|
|         | 115.0502        | 58.0287         | 39.0216         | 1  | N      | 19 |                 |                 |                 |
|         | 186.0873        | 93.5473         | 62.7006         | 2  | A      | 18 | 1922.8591       | 961.9332        | 641.6246        |
|         | 353.0857        | 177.0465        | 118.3667        | 3  | S[167] | 17 | 1851.8220       | 926.4146        | 617.9455        |
|         | 466.1697        | 233.5885        | 156.0614        | 4  | I      | 16 | 1684.8236       | 842.9155        | 562.2794        |
|         | 595.2123        | 298.1098        | 199.0756        | 5  | E      | 15 | 1571.7396       | 786.3734        | 524.5847        |
|         | 682.2444        | 341.6258        | 228.0863        | 6  | S      | 14 | 1442.6970       | 721.8521        | 481.5705        |
|         | 818.3535        | 409.6804        | 273.4560        | 7  | K[136] | 13 | 1355.6649       | 678.3361        | 452.5598        |
|         | 999.3675        | 500.1874        | 333.7940        | 8  | T[181] | 12 | 1219.5558       | 610.2815        | 407.1901        |
|         | 1056.3890       | 528.6981        | 352.8012        | 9  | G      | 11 | 1038.5418       | 519.7745        | 346.8521        |
|         | 1169.4731       | 585.2402        | 390.4959        | 10 | L      | 10 | 981.5203        | 491.2638        | 327.8450        |
|         | 1240.5102       | 620.7587        | 414.1749        | 11 | A      | 9  | 868.4363        | 434.7218        | 290.1503        |
|         | 1297.5316       | 649.2695        | 433.1821        | 12 | G      | 8  | 797.3991        | 399.2032        | 266.4712        |
|         | 1411.5746       | 706.2909        | 471.1964        | 13 | N      | 7  | 740.3777        | 370.6925        | 247.4641        |
|         | 1539.6331       | 770.3202        | 513.8826        | 14 | Q      | 6  | 626.3348        | 313.6710        | 209.4498        |
|         | 1610.6702       | 805.8388        | 537.5616        | 15 | A      | 5  | 498.2762        | 249.6417        | 166.7636        |
|         | 1711.7179       | 856.3626        | 571.2442        | 16 | T      | 4  | 427.2391        | 214.1232        | 143.0845        |
|         | 1825.7609       | 913.3841        | 609.2585        | 17 | N      | 3  | 326.1914        | 163.5993        | 109.4020        |
|         | 1882.7823       | 941.8948        | 628.2656        | 18 | G      | 2  | 212.1485        | 106.5779        | 71.3877         |
|         |                 |                 |                 | 19 | K[136] | 1  | 155.1270        | 78.0671         | 52.3805         |



# Annotated spectra from Saleem et. al. 2009

R.NAS<sub>167</sub>QTS<sub>167</sub>LHPDNFSNC<sub>160</sub>TPIR<sub>166</sub>A/3

0.8921

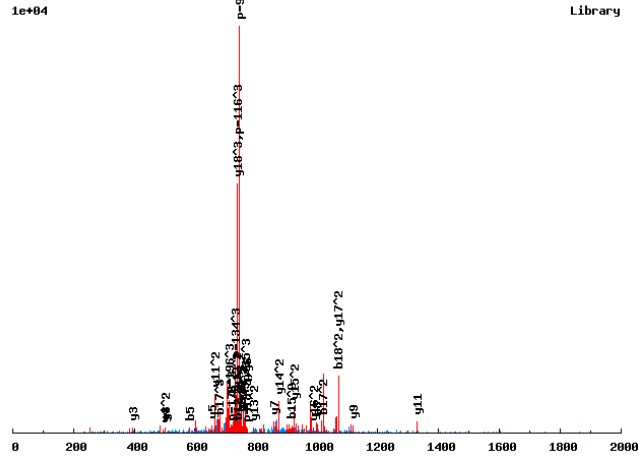

| Library | b <sup>1+</sup> | b <sup>2+</sup>  | b <sup>3+</sup> | #  | AA     | #  | y <sup>1+</sup>  | y <sup>2+</sup>  | y <sup>3+</sup> |
|---------|-----------------|------------------|-----------------|----|--------|----|------------------|------------------|-----------------|
|         | 115.0502        | 58.0287          | 39.0216         | 1  | N      | 19 |                  |                  |                 |
|         | 186.0873        | 93.5473          | 62.7006         | 2  | A      | 18 | 2214.8914        | 1107.9494        | <b>738.9687</b> |
|         | 353.0857        | 177.0465         | 118.3667        | 3  | S[167] | 17 | 2143.8543        | <b>1072.4308</b> | 715.2896        |
|         | 481.1443        | 241.0758         | 161.0529        | 4  | Q      | 16 | 1976.8560        | <b>988.9316</b>  | 659.6235        |
|         | <b>582.1919</b> | 291.5996         | 194.7355        | 5  | T      | 15 | 1848.7974        | <b>924.9023</b>  | 616.9373        |
|         | <b>749.1903</b> | 375.0988         | 250.4016        | 6  | S[167] | 14 | 1747.7497        | <b>874.3785</b>  | 583.2548        |
|         | 862.2744        | 431.6408         | 288.0963        | 7  | L      | 13 | 1580.7513        | <b>790.8793</b>  | 527.5886        |
|         | <b>999.3333</b> | 500.1703         | 333.7826        | 8  | H      | 12 | 1467.6673        | <b>734.3373</b>  | 489.8939        |
|         | 1096.3860       | 548.6967         | 366.1335        | 9  | P      | 11 | <b>1330.6084</b> | <b>665.8078</b>  | 444.2076        |
|         | 1211.4130       | 606.2101         | 404.4758        | 10 | D      | 10 | 1233.5556        | 617.2814         | 411.8567        |
|         | 1325.4559       | 663.2316         | 442.4902        | 11 | N      | 9  | <b>1118.5287</b> | 559.7680         | 373.5144        |
|         | 1472.5243       | <b>736.7658</b>  | 491.5130        | 12 | F      | 8  | 1004.4857        | <b>502.7465</b>  | 335.5001        |
|         | 1559.5563       | 780.2818         | 520.5236        | 13 | S      | 7  | <b>857.4173</b>  | 429.2123         | 286.4773        |
|         | 1673.5993       | 837.3033         | 558.5379        | 14 | N      | 6  | <b>770.3853</b>  | 385.6963         | 257.4666        |
|         | 1833.6299       | <b>917.3186</b>  | 611.8815        | 15 | C[160] | 5  | <b>656.3424</b>  | 328.6748         | 219.4523        |
|         | 1934.6776       | 967.8424         | 645.5641        | 16 | T      | 4  | <b>496.3117</b>  | 248.6595         | 166.1088        |
|         | 2031.7304       | <b>1016.3688</b> | <b>677.9150</b> | 17 | P      | 3  | <b>395.2640</b>  | 198.1357         | 132.4262        |
|         | 2144.8144       | <b>1072.9109</b> | 715.6097        | 18 | I      | 2  | 298.2113         | 149.6093         | 100.0753        |
|         |                 |                  |                 | 19 | R[166] | 1  | 185.1272         | 93.0672          | 62.3806         |

# Annotated spectra from Saleem et. al. 2009

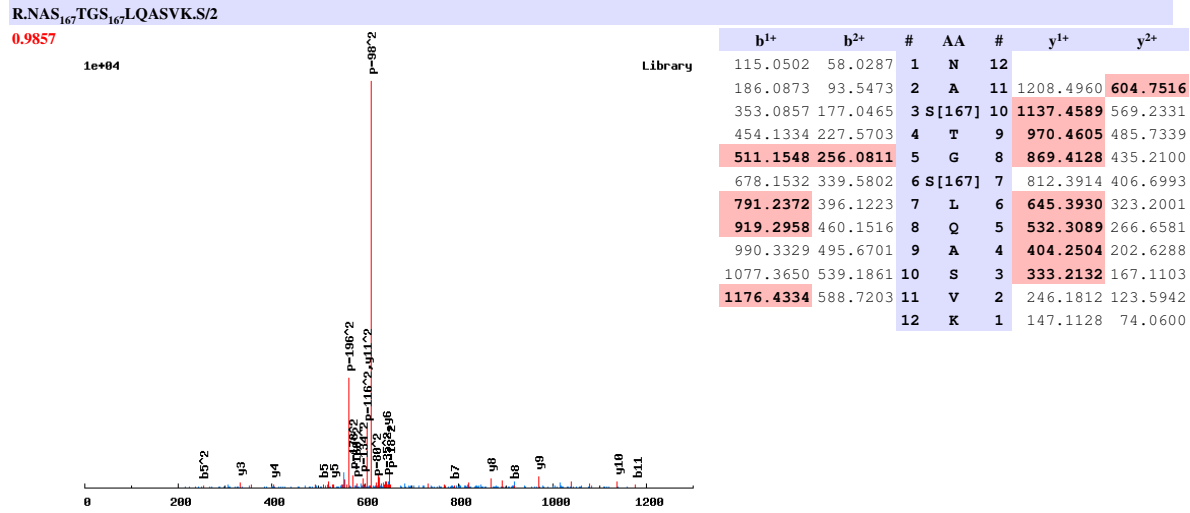

Annotated spectra from Saleem et. al. 2009

R.NAT<sub>181</sub>VDSSINQY<sub>243</sub>K<sub>136</sub>NDSQFQEWAK<sub>136</sub>N/3

0.7405

1e+04

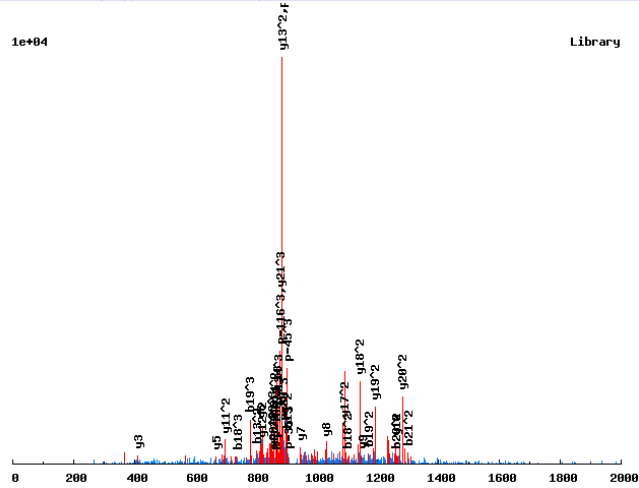

| Library | b <sup>1+</sup> | b <sup>2+</sup> | b <sup>3+</sup> | #  | AA     | #  | y <sup>1+</sup> | y <sup>2+</sup> | y <sup>3+</sup> |
|---------|-----------------|-----------------|-----------------|----|--------|----|-----------------|-----------------|-----------------|
|         | 115.0502        | 58.0287         | 39.0216         | 1  | N      | 22 |                 |                 |                 |
|         | 186.0873        | 93.5473         | 62.7006         | 2  | A      | 21 | 2635.1084       | 1318.0578       | 879.0410        |
|         | 367.1013        | 184.0543        | 123.0386        | 3  | T[181] | 20 | 2564.0713       | 1282.5393       | 855.3620        |
|         | 466.1697        | 233.5885        | 156.0614        | 4  | V      | 19 | 2383.0573       | 1192.0323       | 795.0239        |
|         | 581.1967        | 291.1020        | 194.4037        | 5  | D      | 18 | 2283.9889       | 1142.4981       | 762.0011        |
|         | 668.2287        | 334.6180        | 223.4144        | 6  | S      | 17 | 2168.9619       | 1084.9846       | 723.6588        |
|         | 755.2607        | 378.1340        | 252.4251        | 7  | S      | 16 | 2081.9299       | 1041.4686       | 694.6482        |
|         | 868.3448        | 434.6760        | 290.1198        | 8  | I      | 15 | 1994.8979       | 997.9526        | 665.6375        |
|         | 982.3877        | 491.6975        | 328.1341        | 9  | N      | 14 | 1881.8138       | 941.4105        | 627.9428        |
|         | 1110.4463       | 555.7268        | 370.8203        | 10 | Q      | 13 | 1767.7709       | 884.3891        | 589.9285        |
|         | 1353.4760       | 677.2416        | 451.8302        | 11 | Y[243] | 12 | 1639.7123       | 820.3598        | 547.2423        |
|         | 1489.5851       | 745.2962        | 497.1999        | 12 | K[136] | 11 | 1396.6826       | 698.8450        | 466.2324        |
|         | 1603.6281       | 802.3177        | 535.2142        | 13 | N      | 10 | 1260.5735       | 630.7904        | 420.8627        |
|         | 1718.6550       | 859.8311        | 573.5565        | 14 | D      | 9  | 1146.5305       | 573.7689        | 382.8484        |
|         | 1805.6870       | 903.3472        | 602.5672        | 15 | S      | 8  | 1031.5036       | 516.2554        | 344.5061        |
|         | 1933.7456       | 967.3764        | 645.2534        | 16 | Q      | 7  | 944.4716        | 472.7394        | 315.4954        |
|         | 2080.8140       | 1040.9107       | 694.2762        | 17 | F      | 6  | 816.4130        | 408.7101        | 272.8092        |
|         | 2208.8726       | 1104.9399       | 736.9624        | 18 | Q      | 5  | 669.3446        | 335.1759        | 223.7864        |
|         | 2337.9152       | 1169.4612       | 779.9766        | 19 | E      | 4  | 541.2860        | 271.1466        | 181.1002        |
|         | 2523.9945       | 1262.5009       | 842.0030        | 20 | W      | 3  | 412.2434        | 206.6253        | 138.0860        |
|         | 2595.0316       | 1298.0194       | 865.6821        | 21 | A      | 2  | 226.1641        | 113.5857        | 76.0596         |
|         |                 |                 |                 | 22 | K[136] | 1  | 155.1270        | 78.0671         | 52.3805         |

# Annotated spectra from Saleem et. al. 2009

K.NAVSTKPTPPAPEAS<sub>167</sub>AESGLSSKVHSDLAY<sub>243</sub>R.M/4

0.9548

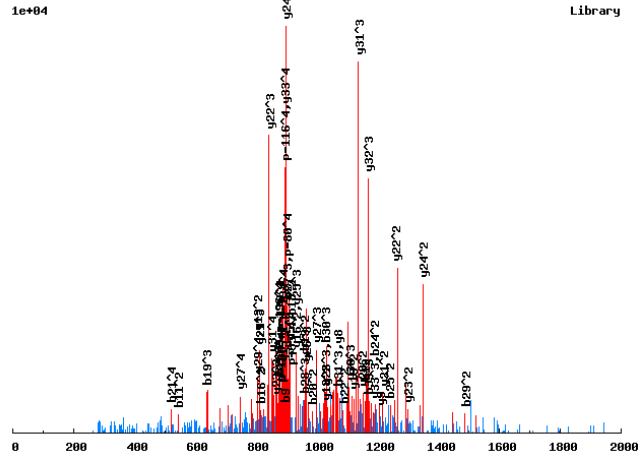

| Library | b <sup>1+</sup>  | b <sup>2+</sup>  | b <sup>3+</sup>  | b <sup>4+</sup> | #  | AA     | #  | y <sup>1+</sup>  | y <sup>2+</sup> | y <sup>3+</sup> | y <sup>4+</sup> |
|---------|------------------|------------------|------------------|-----------------|----|--------|----|------------------|-----------------|-----------------|-----------------|
|         | 115.0502         | 58.0287          | 39.0216          | 47.5180         | 1  | N      | 34 |                  |                 |                 |                 |
|         | 186.0873         | 93.5473          | 62.7006          | 47.2773         | 2  | A      | 33 | 3574.6502        | 1787.8287       | 1192.2216       | 894.4180        |
|         | 285.1557         | 143.0815         | 95.7234          | 72.0444         | 3  | V      | 32 | 3503.6131        | 1752.3102       | 1168.5425       | 876.6587        |
|         | 372.1878         | 186.5975         | 124.7341         | 93.8024         | 4  | S      | 31 | 3404.5447        | 1702.7760       | 1135.5197       | 851.8916        |
|         | 473.2354         | 237.1214         | 158.4167         | 119.0643        | 5  | T      | 30 | 3317.5126        | 1659.2600       | 1106.5091       | 830.1336        |
|         | 601.3304         | 301.1688         | 201.1150         | 151.0881        | 6  | K      | 29 | 3216.4650        | 1608.7361       | 1072.8265       | 804.8717        |
|         | 698.3832         | 349.6952         | 233.4659         | 175.3513        | 7  | P      | 28 | 3088.3700        | 1544.6886       | 1030.1282       | 772.8480        |
|         | 799.4308         | 400.2191         | 267.1485         | 200.6132        | 8  | T      | 27 | 2991.3172        | 1496.1623       | 997.7773        | 748.5848        |
|         | <b>896.4836</b>  | 448.7454         | 299.4994         | 224.8764        | 9  | P      | 26 | 2890.2696        | 1445.6384       | 964.0947        | 723.3229        |
|         | 993.5364         | 497.2718         | 331.8503         | 249.1396        | 10 | P      | 25 | 2793.2168        | 1397.1120       | 931.7438        | 699.0597        |
|         | 1090.5891        | <b>545.7982</b>  | 364.2012         | 273.4027        | 11 | P      | 24 | 2696.1640        | 1348.5857       | 899.3929        | 674.7965        |
|         | <b>1161.6262</b> | 581.3168         | 387.8803         | 291.1620        | 12 | A      | 23 | 2599.1113        | 1300.0593       | 867.0419        | 650.5333        |
|         | 1258.6790        | 629.8431         | 420.2312         | 315.4252        | 13 | P      | 22 | 2528.0742        | 1264.5407       | 843.3629        | 632.7740        |
|         | 1387.7216        | 694.3644         | 463.2454         | 347.6859        | 14 | E      | 21 | 2431.0214        | 1216.0143       | 811.0120        | 608.5108        |
|         | 1458.7587        | 729.8830         | 486.9244         | 365.4451        | 15 | A      | 20 | 2301.9788        | 1151.4931       | 767.9978        | 576.2502        |
|         | 1625.7571        | <b>813.3822</b>  | 542.5905         | 407.1947        | 16 | S[167] | 19 | 2230.9417        | 1115.9745       | 744.3188        | 558.4909        |
|         | 1696.7942        | 848.9007         | 566.2696         | 424.9540        | 17 | A      | 18 | 2063.9434        | 1032.4753       | 688.6526        | 516.7413        |
|         | 1825.8368        | <b>913.4220</b>  | 609.2838         | 457.2146        | 18 | E      | 17 | 1992.9062        | 996.9568        | 664.9736        | 498.9820        |
|         | 1912.8688        | <b>956.9380</b>  | <b>638.2944</b>  | 478.9727        | 19 | S      | 16 | 1863.8637        | 932.4355        | 621.9594        | 466.7214        |
|         | 1969.8902        | <b>985.4488</b>  | 657.3016         | 493.2280        | 20 | G      | 15 | 1776.8316        | 888.9195        | 592.9487        | 444.9634        |
|         | 2082.9743        | 1041.9908        | 694.9963         | <b>521.4990</b> | 21 | L      | 14 | 1719.8102        | 860.4087        | 573.9416        | 430.7080        |
|         | 2170.0063        | <b>1085.5068</b> | 724.0070         | 543.2570        | 22 | S      | 13 | 1606.7261        | 803.8667        | 536.2469        | 402.4370        |
|         | 2257.0384        | 1129.0228        | 753.0176         | 565.0151        | 23 | S      | 12 | 1519.6941        | 760.3507        | 507.2362        | 380.6790        |
|         | 2385.1333        | <b>1193.0703</b> | 795.7160         | 597.0388        | 24 | K      | 11 | 1432.6620        | 716.8347        | 478.2255        | 358.9210        |
|         | 2484.2017        | <b>1242.6045</b> | 828.7388         | 621.8059        | 25 | V      | 10 | 1304.5671        | 652.7872        | 435.5272        | 326.8972        |
|         | 2621.2606        | 1311.1340        | <b>874.4251</b>  | 656.0706        | 26 | H      | 9  | <b>1205.4987</b> | 603.2530        | 402.5044        | 302.1301        |
|         | 2708.2927        | 1354.6500        | <b>903.4357</b>  | 677.8286        | 27 | S      | 8  | <b>1068.4398</b> | 534.7235        | 356.8181        | 267.8654        |
|         | 2871.3560        | 1436.1816        | <b>957.7902</b>  | 718.5945        | 28 | Y      | 7  | 981.4077         | 491.2075        | 327.8074        | 246.1074        |
|         | 2972.4037        | <b>1486.7055</b> | 991.4727         | 743.8564        | 29 | T      | 6  | 818.3444         | 409.6758        | 273.4530        | 205.3416        |
|         | 3087.4306        | 1544.2190        | <b>1029.8151</b> | 772.6131        | 30 | D      | 5  | 717.2967         | 359.1520        | 239.7704        | 180.0796        |
|         | 3200.5147        | 1600.7610        | <b>1067.5097</b> | 800.8841        | 31 | L      | 4  | 602.2698         | 301.6385        | 201.4281        | 151.3229        |
|         | 3271.5518        | 1636.2795        | 1091.1888        | 818.6434        | 32 | A      | 3  | 489.1857         | 245.0965        | 163.7334        | 123.0519        |
|         | 3514.5815        | 1757.7944        | <b>1172.1987</b> | 879.4008        | 33 | Y[243] | 2  | 418.1486         | 209.5779        | 140.0544        | 105.2926        |
|         |                  |                  |                  |                 | 34 | R      | 1  | 175.1190         | 88.0631         | 59.0445         | 44.5352         |

Annotated spectra from Saleem et. al. 2009

K.NAVSTKPTPPAPEASAES<sub>167</sub>GLS<sub>167</sub>SKVHSY<sub>243</sub>TDLAYR.M/4

0.9667

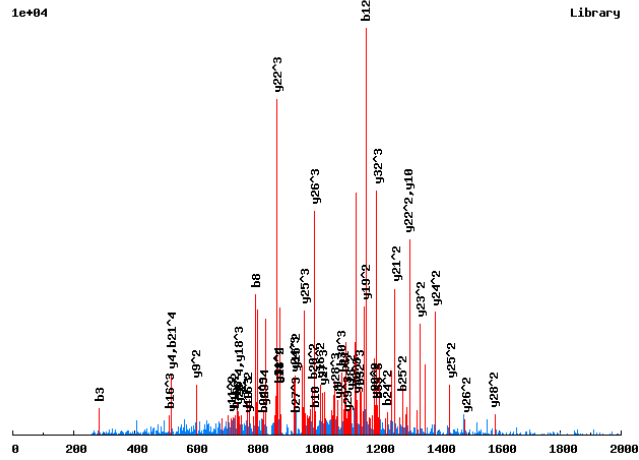

| Library | b <sup>1+</sup>  | b <sup>2+</sup>  | b <sup>3+</sup>  | b <sup>4+</sup> | #  | AA     | #  | y <sup>1+</sup>  | y <sup>2+</sup>  | y <sup>3+</sup>  | y <sup>4+</sup> |
|---------|------------------|------------------|------------------|-----------------|----|--------|----|------------------|------------------|------------------|-----------------|
|         | 115.0502         | 58.0287          | 39.0216          | 29.5180         | 1  | N      | 34 |                  |                  |                  |                 |
|         | 186.0873         | 93.5473          | 62.7006          | 47.2773         | 2  | A      | 33 | 3654.6165        | 1827.8119        | 1218.8770        | 914.4096        |
|         | <b>285.1557</b>  | 143.0815         | 95.7234          | 72.0444         | 3  | V      | 32 | 3583.5794        | 1792.2933        | <b>1195.1980</b> | 896.6503        |
|         | 372.1878         | 186.5975         | 124.7341         | 93.8024         | 4  | S      | 31 | 3484.5110        | 1742.7591        | <b>1162.1752</b> | <b>871.8832</b> |
|         | 473.2354         | 237.1214         | 158.4167         | 119.0643        | 5  | T      | 30 | 3397.4790        | 1699.2431        | <b>1133.1645</b> | 850.1252        |
|         | 601.3304         | 301.1688         | 201.1150         | 151.0881        | 6  | K      | 29 | 3296.4313        | 1648.7193        | <b>1099.4820</b> | <b>824.8633</b> |
|         | 698.3832         | 349.6952         | 233.4659         | 175.3513        | 7  | P      | 28 | 3168.3363        | <b>1584.6718</b> | <b>1056.7836</b> | 792.8395        |
|         | <b>799.4308</b>  | 400.2191         | 267.1485         | 200.6132        | 8  | T      | 27 | 3071.2836        | 1536.1454        | <b>1024.4327</b> | 768.5764        |
|         | 896.4836         | 448.7454         | 299.4994         | 224.8764        | 9  | P      | 26 | 2970.2359        | <b>1485.6216</b> | <b>990.7502</b>  | <b>743.3144</b> |
|         | <b>993.5364</b>  | 497.2718         | 331.8503         | 249.1396        | 10 | P      | 25 | 2873.1831        | <b>1437.0952</b> | <b>958.3992</b>  | 719.0512        |
|         | <b>1090.5891</b> | 545.7982         | 364.2012         | 273.4027        | 11 | P      | 24 | 2776.1304        | <b>1388.5688</b> | <b>926.0483</b>  | 694.7881        |
|         | <b>1161.6262</b> | 581.3168         | 387.8803         | 291.1620        | 12 | A      | 23 | 2679.0776        | <b>1340.0424</b> | 893.6974         | 670.5249        |
|         | 1258.6790        | 629.8431         | 420.2312         | 315.4252        | 13 | P      | 22 | 2608.0405        | <b>1304.5239</b> | <b>870.0184</b>  | 652.7656        |
|         | 1387.7216        | 694.3644         | 463.2454         | 347.6859        | 14 | E      | 21 | 2510.9877        | <b>1255.9975</b> | 837.6674         | 628.5024        |
|         | 1458.7587        | <b>729.8830</b>  | 486.9244         | 365.4451        | 15 | A      | 20 | 2381.9452        | <b>1191.4762</b> | 794.6532         | 596.2417        |
|         | 1545.7907        | <b>773.3990</b>  | <b>515.9351</b>  | 387.2031        | 16 | S      | 19 | 2310.9080        | <b>1155.9577</b> | <b>770.9742</b>  | 578.4825        |
|         | 1616.8278        | 808.9176         | 539.6141         | 404.9624        | 17 | A      | 18 | 2223.8760        | <b>1112.4416</b> | <b>741.9635</b>  | 556.7245        |
|         | 1745.8704        | <b>873.4389</b>  | 582.6283         | 437.2231        | 18 | E      | 17 | 2152.8389        | 1076.9231        | 718.2845         | 538.9652        |
|         | 1912.8688        | 956.9380         | 638.2944         | 478.9727        | 19 | S[167] | 16 | 2023.7963        | <b>1012.4018</b> | 675.2703         | 506.7045        |
|         | 1969.8902        | <b>985.4488</b>  | 657.3016         | 493.2280        | 20 | G      | 15 | 1856.7980        | <b>928.9026</b>  | 619.6042         | 464.9549        |
|         | 2082.9743        | 1041.9908        | 694.9963         | <b>521.4990</b> | 21 | L      | 14 | 1799.7765        | 900.3919         | 600.5970         | 450.6996        |
|         | 2249.9727        | 1125.4900        | 750.6624         | 563.2486        | 22 | S[167] | 13 | 1686.6924        | 843.8499         | 562.9023         | 422.4286        |
|         | 2337.0047        | 1169.0060        | 779.6731         | 585.0066        | 23 | S      | 12 | 1519.6941        | 760.3507         | 507.2362         | 380.6790        |
|         | 2465.0997        | <b>1233.0535</b> | <b>822.3714</b>  | 617.0304        | 24 | K      | 11 | 1432.6620        | <b>716.8347</b>  | 478.2255         | 358.9210        |
|         | 2564.1681        | <b>1282.5877</b> | 855.3942         | 641.7975        | 25 | V      | 10 | <b>1304.5671</b> | 652.7872         | 435.5272         | 326.8972        |
|         | 2701.2270        | 1351.1171        | 901.0805         | 676.0622        | 26 | H      | 9  | 1205.4987        | <b>603.2530</b>  | 402.5044         | 302.1301        |
|         | 2788.2590        | 1394.6331        | <b>930.0912</b>  | 697.8202        | 27 | S      | 8  | <b>1068.4398</b> | 534.7235         | 356.8181         | 267.8654        |
|         | 3031.2887        | 1516.1480        | 1011.1011        | 758.5776        | 28 | Y[243] | 7  | 981.4077         | 491.2075         | 327.8074         | 246.1074        |
|         | 3132.3363        | 1566.6718        | 1044.7836        | 783.8395        | 29 | T      | 6  | <b>738.3781</b>  | 369.6927         | 246.7975         | 185.3500        |
|         | 3247.3633        | 1624.1853        | <b>1083.1259</b> | 812.5963        | 30 | D      | 5  | 637.3304         | 319.1688         | 213.1150         | 160.0881        |
|         | 3360.4473        | 1680.7273        | 1120.8206        | 840.8673        | 31 | L      | 4  | <b>522.3035</b>  | 261.6554         | 174.7727         | 131.3313        |
|         | 3431.4845        | 1716.2459        | <b>1144.4997</b> | 858.6266        | 32 | A      | 3  | 409.2194         | 205.1133         | 137.0780         | 103.0603        |
|         | 3594.5478        | 1797.7775        | <b>1198.8541</b> | 899.3924        | 33 | Y      | 2  | 338.1823         | 169.5948         | 113.3989         | 85.3010         |
|         |                  |                  |                  |                 | 34 | R      | 1  | 175.1190         | 88.0631          | 59.0445          | 44.5352         |

Annotated spectra from Saleem et. al. 2009

K.NDDSL<sub>167</sub>HDDLILLSAK<sub>136</sub>-K/2

0.9995

1e+04

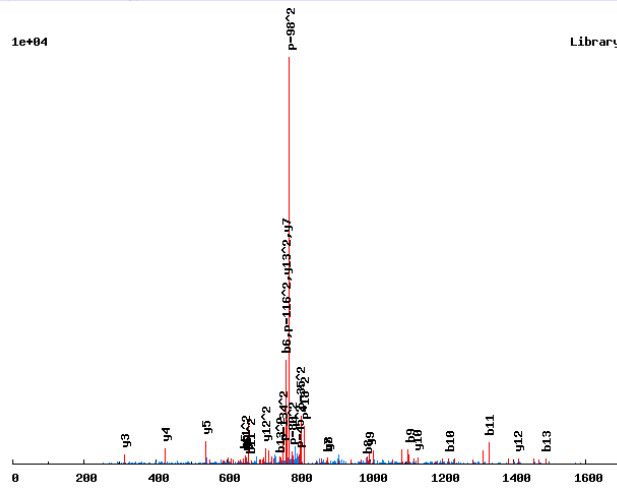

| Library | b <sup>1+</sup> | b <sup>2+</sup> | #  | AA     | #  | y <sup>1+</sup> | y <sup>2+</sup> |
|---------|-----------------|-----------------|----|--------|----|-----------------|-----------------|
|         | 115.0502        | 58.0287         | 1  | N      | 14 |                 |                 |
|         | 230.0771        | 115.5422        | 2  | D      | 13 | 1529.6974       | 765.3523        |
|         | 345.1041        | 173.0557        | 3  | D      | 12 | 1414.6705       | 707.8389        |
|         | 512.1025        | 256.5549        | 4  | S[167] | 11 | 1299.6435       | 650.3254        |
|         | 649.1614        | 325.0843        | 5  | H      | 10 | 1132.6452       | 566.8262        |
|         | 764.1883        | 382.5978        | 6  | D      | 9  | 995.5863        | 498.2968        |
|         | 879.2152        | 440.1113        | 7  | D      | 8  | 880.5593        | 440.7833        |
|         | 992.2993        | 496.6533        | 8  | L      | 7  | 765.5324        | 383.2698        |
|         | 1105.3834       | 553.1953        | 9  | I      | 6  | 652.4483        | 326.7278        |
|         | 1218.4674       | 609.7374        | 10 | L      | 5  | 539.3643        | 270.1858        |
|         | 1331.5515       | 666.2794        | 11 | L      | 4  | 426.2802        | 213.6437        |
|         | 1418.5835       | 709.7954        | 12 | S      | 3  | 313.1961        | 157.1017        |
|         | 1489.6206       | 745.3140        | 13 | A      | 2  | 226.1641        | 113.5857        |
|         |                 |                 | 14 | K[136] | 1  | 155.1270        | 78.0671         |

# Annotated spectra from Saleem et. al. 2009

R.NDNASGGYMQPDQSS<sub>167</sub>NAS<sub>167</sub>M<sub>147</sub>HK<sub>136</sub>R<sub>166</sub>D/3

0.9586

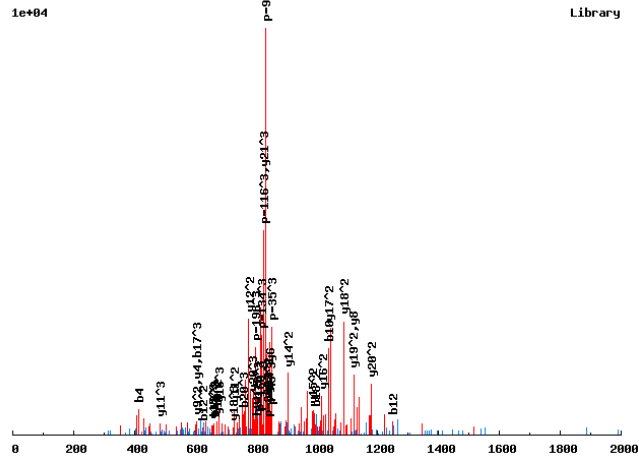

| Library | b <sup>1+</sup> | b <sup>2+</sup> | b <sup>3+</sup> | #  | AA     | #  | y <sup>1+</sup> | y <sup>2+</sup> | y <sup>3+</sup> |
|---------|-----------------|-----------------|-----------------|----|--------|----|-----------------|-----------------|-----------------|
|         | 115.0502        | 58.0287         | 39.0216         | 1  | N      | 22 |                 |                 |                 |
|         | 230.0771        | 115.5422        | 77.3639         | 2  | D      | 21 | 2474.9221       | 1237.9647       | 825.6456        |
|         | 344.1201        | 172.5637        | 115.3782        | 3  | N      | 20 | 2359.8952       | 1180.4512       | 787.3032        |
|         | 415.1572        | 208.0822        | 139.0572        | 4  | A      | 19 | 2245.8522       | 1123.4298       | 749.2889        |
|         | 502.1892        | 251.5982        | 168.0679        | 5  | S      | 18 | 2174.8151       | 1087.9112       | 725.6099        |
|         | 559.2107        | 280.1090        | 187.0751        | 6  | G      | 17 | 2087.7831       | 1044.3952       | 696.5992        |
|         | 616.2321        | 308.6197        | 206.0822        | 7  | G      | 16 | 2030.7616       | 1015.8845       | 677.5921        |
|         | 779.2955        | 390.1514        | 260.4367        | 8  | Y      | 15 | 1973.7402       | 987.3737        | 658.5849        |
|         | 910.3360        | 455.6716        | 304.1168        | 9  | M      | 14 | 1810.6768       | 905.8421        | 604.2305        |
|         | 1038.3945       | 519.7009        | 346.8030        | 10 | Q      | 13 | 1679.6363       | 840.3218        | 560.5503        |
|         | 1135.4473       | 568.2273        | 379.1540        | 11 | P      | 12 | 1551.5778       | 776.2925        | 517.8641        |
|         | 1250.4742       | 625.7408        | 417.4963        | 12 | D      | 11 | 1454.5250       | 727.7661        | 485.5132        |
|         | 1378.5328       | 689.7701        | 460.1825        | 13 | Q      | 10 | 1339.4981       | 670.2527        | 447.1709        |
|         | 1465.5649       | 733.2861        | 489.1931        | 14 | S      | 9  | 1211.4395       | 606.2234        | 404.4847        |
|         | 1632.5632       | 816.7852        | 544.8593        | 15 | S[167] | 8  | 1124.4074       | 562.7074        | 375.4740        |
|         | 1746.6061       | 873.8067        | 582.8736        | 16 | N      | 7  | 957.4091        | 479.2082        | 319.8079        |
|         | 1817.6433       | 909.3253        | 606.5526        | 17 | A      | 6  | 843.3662        | 422.1867        | 281.7936        |
|         | 1984.6416       | 992.8244        | 662.2187        | 18 | S[167] | 5  | 772.3290        | 386.6682        | 258.1145        |
|         | 2131.6770       | 1066.3421       | 711.2305        | 19 | M[147] | 4  | 605.3307        | 303.1690        | 202.4484        |
|         | 2268.7359       | 1134.8716       | 756.9168        | 20 | H      | 3  | 458.2953        | 229.6513        | 153.4366        |
|         | 2404.8451       | 1202.9262       | 802.2865        | 21 | K[136] | 2  | 321.2364        | 161.1218        | 107.7503        |
|         |                 |                 |                 | 22 | R[166] | 1  | 185.1272        | 93.0672         | 62.3806         |

# Annotated spectra from Saleem et. al. 2009

K.NEDVNIDS<sub>167</sub>NQSDIET<sub>181</sub>DGETEK.S/2

0.9998

1e+04

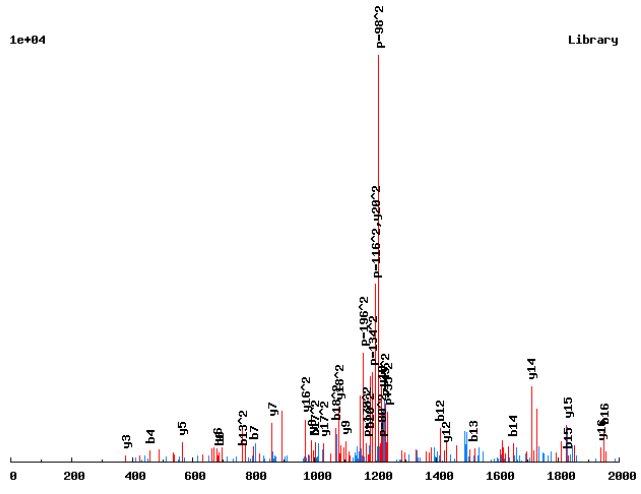

| Library | b <sup>1+</sup> | b <sup>2+</sup> | #  | AA     | #  | y <sup>1+</sup> | y <sup>2+</sup> |
|---------|-----------------|-----------------|----|--------|----|-----------------|-----------------|
|         | 115.0502        | 58.0287         | 1  | N      | 21 |                 |                 |
|         | 244.0928        | 122.5500        | 2  | E      | 20 | 2397.8854       | 1199.4464       |
|         | 359.1197        | 180.0635        | 3  | D      | 19 | 2268.8428       | 1134.9251       |
|         | 458.1881        | 229.5977        | 4  | V      | 18 | 2153.8159       | 1077.4116       |
|         | 572.2311        | 286.6192        | 5  | N      | 17 | 2054.7475       | 1027.8774       |
|         | 685.3151        | 343.1612        | 6  | I      | 16 | 1940.7046       | 970.8559        |
|         | 800.3421        | 400.6747        | 7  | D      | 15 | 1827.6205       | 914.3139        |
|         | 967.3404        | 484.1739        | 8  | S[167] | 14 | 1712.5936       | 856.8004        |
|         | 1081.3834       | 541.1953        | 9  | N      | 13 | 1545.5952       | 773.3012        |
|         | 1209.4420       | 605.2246        | 10 | Q      | 12 | 1431.5523       | 716.2798        |
|         | 1296.4740       | 648.7406        | 11 | S      | 11 | 1303.4937       | 652.2505        |
|         | 1411.5009       | 706.2541        | 12 | D      | 10 | 1216.4617       | 608.7345        |
|         | 1524.5850       | 762.7961        | 13 | I      | 9  | 1101.4347       | 551.2210        |
|         | 1653.6276       | 827.3174        | 14 | E      | 8  | 988.3507        | 494.6790        |
|         | 1834.6416       | 917.8244        | 15 | T[181] | 7  | 859.3081        | 430.1577        |
|         | 1949.6685       | 975.3379        | 16 | D      | 6  | 678.2941        | 339.6507        |
|         | 2006.6900       | 1003.8486       | 17 | G      | 5  | 563.2671        | 282.1372        |
|         | 2135.7326       | 1068.3699       | 18 | E      | 4  | 506.2457        | 253.6265        |
|         | 2236.7803       | 1118.8938       | 19 | T      | 3  | 377.2031        | 189.1052        |
|         | 2365.8228       | 1183.4151       | 20 | E      | 2  | 276.1554        | 138.5813        |
|         |                 |                 | 21 | K      | 1  | 147.1128        | 74.0600         |



Annotated spectra from Saleem et. al. 2009

R.NEGLSSTSRs<sub>167</sub>DS<sub>167</sub>ASTAHVR.T/3

0.9234

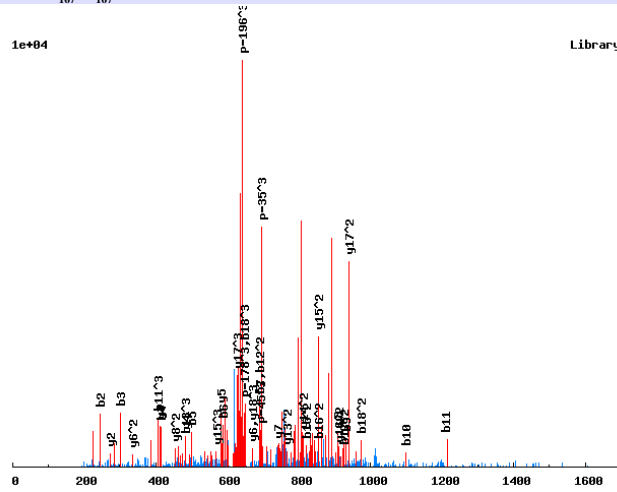

| Library | b <sup>1+</sup>  | b <sup>2+</sup> | b <sup>3+</sup> | #  | AA     | #  | y <sup>1+</sup> | y <sup>2+</sup> | y <sup>3+</sup> |
|---------|------------------|-----------------|-----------------|----|--------|----|-----------------|-----------------|-----------------|
|         | 115.0502         | 58.0287         | 39.0216         | 1  | N      | 19 |                 |                 |                 |
|         | <b>244.0928</b>  | 122.5500        | 82.0358         | 2  | E      | 18 | 2007.8169       | 1004.4121       | <b>669.9438</b> |
|         | <b>301.1143</b>  | 151.0608        | 101.0429        | 3  | G      | 17 | 1878.7743       | <b>939.8908</b> | <b>626.9296</b> |
|         | <b>414.1983</b>  | 207.6028        | 138.7376        | 4  | L      | 16 | 1821.7528       | <b>911.3800</b> | 607.9225        |
|         | <b>501.2303</b>  | 251.1188        | 167.7483        | 5  | S      | 15 | 1708.6687       | <b>854.8380</b> | <b>570.2278</b> |
|         | <b>588.2624</b>  | 294.6348        | 196.7590        | 6  | S      | 14 | 1621.6367       | <b>811.3220</b> | 541.2171        |
|         | <b>689.3101</b>  | 345.1587        | 230.4415        | 7  | T      | 13 | 1534.6047       | <b>767.8060</b> | 512.2064        |
|         | 776.3421         | 388.6747        | 259.4522        | 8  | S      | 12 | 1433.5570       | 717.2821        | 478.5239        |
|         | <b>932.4432</b>  | 466.7252        | 311.4859        | 9  | R      | 11 | 1346.5250       | 673.7661        | 449.5132        |
|         | <b>1099.4416</b> | 550.2244        | 367.1520        | 10 | S[167] | 10 | 1190.4239       | 595.7156        | 397.4795        |
|         | <b>1214.4685</b> | 607.7379        | <b>405.4944</b> | 11 | D      | 9  | 1023.4255       | 512.2164        | 341.8134        |
|         | 1381.4669        | <b>691.2371</b> | 461.1605        | 12 | S[167] | 8  | <b>908.3986</b> | <b>454.7029</b> | 303.4710        |
|         | 1452.5040        | 726.7556        | <b>484.8395</b> | 13 | A      | 7  | <b>741.4002</b> | 371.2037        | 247.8049        |
|         | 1539.5360        | 770.2716        | 513.8502        | 14 | S      | 6  | <b>670.3631</b> | <b>335.6852</b> | 224.1259        |
|         | 1640.5837        | <b>820.7955</b> | 547.5327        | 15 | T      | 5  | <b>583.3311</b> | 292.1692        | 195.1152        |
|         | 1711.6208        | <b>856.3140</b> | 571.2118        | 16 | A      | 4  | <b>482.2834</b> | 241.6453        | 161.4326        |
|         | 1848.6797        | <b>924.8435</b> | 616.8981        | 17 | H      | 3  | <b>411.2463</b> | 206.1268        | 137.7536        |
|         | 1947.7481        | <b>974.3777</b> | <b>649.9209</b> | 18 | V      | 2  | <b>274.1874</b> | 137.5973        | 92.0673         |
|         |                  |                 |                 | 19 | R      | 1  | 175.1190        | 88.0631         | 59.0445         |

# Annotated spectra from Saleem et. al. 2009

R.NEGLSST<sub>181</sub>SRSDS<sub>167</sub>AST<sub>181</sub>AHVR.T/3

0.6376

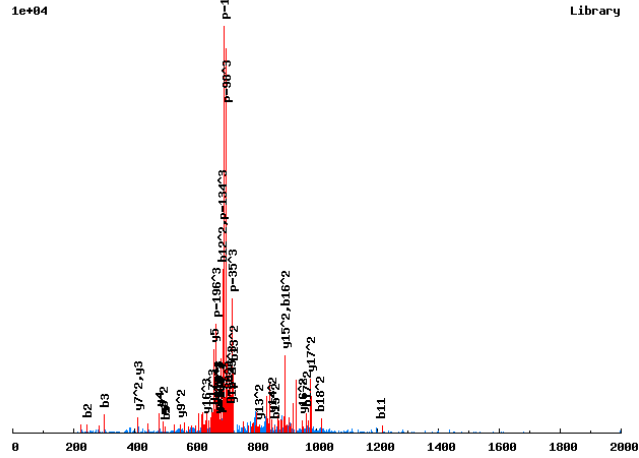

| Library | b <sup>1+</sup>  | b <sup>2+</sup>  | b <sup>3+</sup> | #  | AA     | #  | y <sup>1+</sup> | y <sup>2+</sup> | y <sup>3+</sup> |
|---------|------------------|------------------|-----------------|----|--------|----|-----------------|-----------------|-----------------|
|         | 115.0502         | 58.0287          | 39.0216         | 1  | N      | 19 |                 |                 |                 |
|         | <b>244.0928</b>  | 122.5500         | 82.0358         | 2  | E      | 18 | 2087.7832       | 1044.3952       | <b>696.5992</b> |
|         | <b>301.1143</b>  | 151.0608         | 101.0429        | 3  | G      | 17 | 1958.7406       | <b>979.8739</b> | <b>653.5851</b> |
|         | 414.1983         | 207.6028         | 138.7376        | 4  | L      | 16 | 1901.7191       | <b>951.3632</b> | <b>634.5779</b> |
|         | <b>501.2303</b>  | 251.1188         | 167.7483        | 5  | S      | 15 | 1788.6351       | <b>894.8212</b> | 596.8832        |
|         | 588.2624         | 294.6348         | 196.7590        | 6  | S      | 14 | 1701.6030       | <b>851.3052</b> | 567.8725        |
|         | 769.2764         | 385.1418         | 257.0970        | 7  | T[181] | 13 | 1614.5710       | <b>807.7891</b> | 538.8619        |
|         | 856.3084         | 428.6579         | 286.1077        | 8  | S      | 12 | 1433.5570       | <b>717.2821</b> | 478.5239        |
|         | 1012.4095        | 506.7084         | 338.1414        | 9  | R      | 11 | 1346.5250       | <b>673.7661</b> | 449.5132        |
|         | 1099.4416        | 550.2244         | 367.1520        | 10 | S      | 10 | 1190.4239       | 595.7156        | 397.4795        |
|         | <b>1214.4685</b> | 607.7379         | 405.4944        | 11 | D      | 9  | 1103.3918       | <b>552.1996</b> | 368.4688        |
|         | 1381.4669        | <b>691.2371</b>  | 461.1605        | 12 | S[167] | 8  | 988.3649        | <b>494.6861</b> | 330.1265        |
|         | 1452.5040        | <b>726.7556</b>  | 484.8395        | 13 | A      | 7  | 821.3665        | <b>411.1869</b> | 274.4604        |
|         | 1539.5360        | 770.2716         | 513.8502        | 14 | S      | 6  | 750.3294        | 375.6684        | 250.7813        |
|         | 1720.5500        | <b>860.7786</b>  | 574.1882        | 15 | T[181] | 5  | <b>663.2974</b> | 332.1523        | 221.7707        |
|         | 1791.5871        | <b>896.2972</b>  | 597.8672        | 16 | A      | 4  | <b>482.2834</b> | 241.6453        | 161.4326        |
|         | 1928.6460        | <b>964.8267</b>  | 643.5535        | 17 | H      | 3  | <b>411.2463</b> | 206.1268        | 137.7536        |
|         | 2027.7144        | <b>1014.3609</b> | <b>676.5763</b> | 18 | V      | 2  | 274.1874        | 137.5973        | 92.0673         |
|         |                  |                  |                 | 19 | R      | 1  | 175.1190        | 88.0631         | 59.0445         |

# Annotated spectra from Saleem et. al. 2009

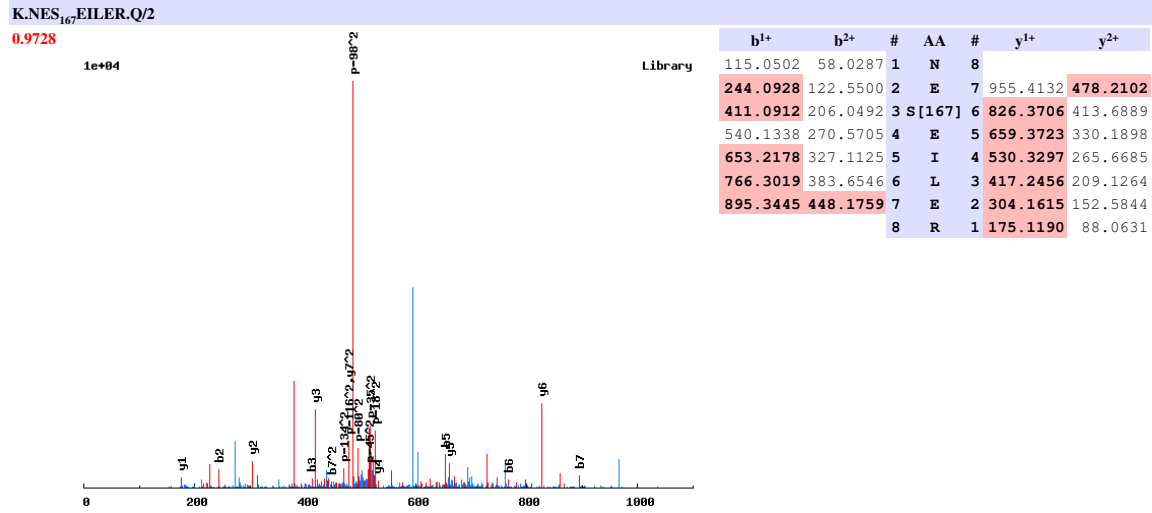

# Annotated spectra from Saleem et. al. 2009

K.NES<sub>167</sub>FHDNLS<sub>167</sub>ESQVQPAVAPPNTGK.G/3

0.9995

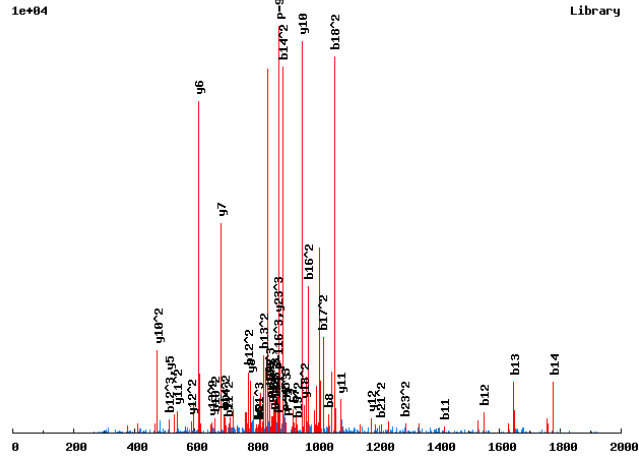

| Library | b <sup>1+</sup> | b <sup>2+</sup> | b <sup>3+</sup> | #  | AA     | #  | y <sup>1+</sup> | y <sup>2+</sup> | y <sup>3+</sup> |
|---------|-----------------|-----------------|-----------------|----|--------|----|-----------------|-----------------|-----------------|
|         | 115.0502        | 58.0287         | 39.0216         | 1  | N      | 24 |                 |                 |                 |
|         | 244.0928        | 122.5500        | 82.0358         | 2  | E      | 23 | 2612.1065       | 1306.5569       | 871.3737        |
|         | 411.0912        | 206.0492        | 137.7019        | 3  | S[167] | 22 | 2483.0639       | 1242.0356       | 828.3595        |
|         | 558.1596        | 279.5834        | 186.7247        | 4  | F      | 21 | 2316.0656       | 1158.5364       | 772.6934        |
|         | 695.2185        | 348.1129        | 232.4110        | 5  | H      | 20 | 2168.9972       | 1085.0022       | 723.6706        |
|         | 810.2454        | 405.6264        | 270.7533        | 6  | D      | 19 | 2031.9383       | 1016.4728       | 677.9843        |
|         | 924.2884        | 462.6478        | 308.7676        | 7  | N      | 18 | 1916.9113       | 958.9593        | 639.6420        |
|         | 1037.3724       | 519.1898        | 346.4623        | 8  | L      | 17 | 1802.8684       | 901.9378        | 601.6277        |
|         | 1204.3708       | 602.6890        | 402.1284        | 9  | S[167] | 16 | 1689.7843       | 845.3958        | 563.9330        |
|         | 1333.4134       | 667.2103        | 445.1426        | 10 | E      | 15 | 1522.7860       | 761.8966        | 508.2668        |
|         | 1420.4454       | 710.7263        | 474.1533        | 11 | S      | 14 | 1393.7434       | 697.3753        | 465.2526        |
|         | 1548.5040       | 774.7556        | 516.8395        | 12 | Q      | 13 | 1306.7113       | 653.8593        | 436.2420        |
|         | 1647.5724       | 824.2898        | 549.8623        | 13 | V      | 12 | 1178.6528       | 589.8300        | 393.5558        |
|         | 1775.6310       | 888.3191        | 592.5485        | 14 | Q      | 11 | 1079.5844       | 540.2958        | 360.5330        |
|         | 1872.6837       | 936.8455        | 624.8994        | 15 | P      | 10 | 951.5258        | 476.2665        | 317.8468        |
|         | 1943.7208       | 972.3641        | 648.5785        | 16 | A      | 9  | 854.4730        | 427.7402        | 285.4959        |
|         | 2042.7892       | 1021.8983       | 681.6013        | 17 | V      | 8  | 783.4359        | 392.2216        | 261.8168        |
|         | 2113.8264       | 1057.4168       | 705.2803        | 18 | A      | 7  | 684.3675        | 342.6874        | 228.7940        |
|         | 2210.8791       | 1105.9432       | 737.6312        | 19 | P      | 6  | 613.3304        | 307.1688        | 205.1150        |
|         | 2307.9319       | 1154.4696       | 769.9821        | 20 | P      | 5  | 516.2776        | 258.6425        | 172.7641        |
|         | 2421.9748       | 1211.4910       | 807.9965        | 21 | N      | 4  | 419.2249        | 210.1161        | 140.4131        |
|         | 2523.0225       | 1262.0149       | 841.6790        | 22 | T      | 3  | 305.1819        | 153.0946        | 102.3988        |
|         | 2580.0439       | 1290.5256       | 860.6862        | 23 | G      | 2  | 204.1343        | 102.5708        | 68.7163         |
|         |                 |                 |                 | 24 | K      | 1  | 147.1128        | 74.0600         | 49.7091         |

Annotated spectra from Saleem et. al. 2009

K.NFDNVPAEEEEIKEETPAEKDHDVT<sub>181</sub>K.F/3

0.9979

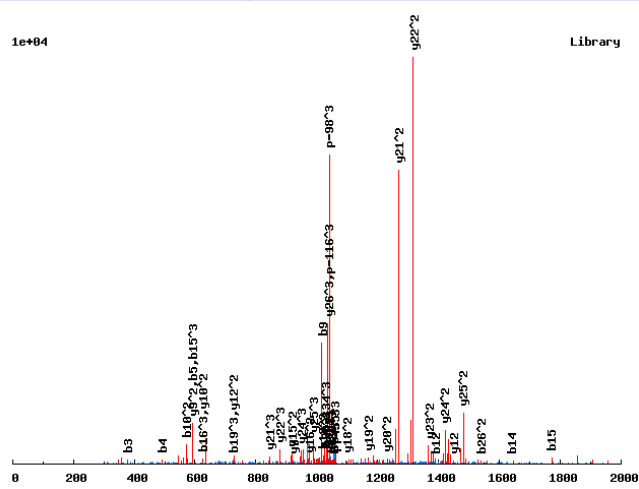

| Library | b <sup>1+</sup> | b <sup>2+</sup> | b <sup>3+</sup> | #  | AA     | #  | y <sup>1+</sup> | y <sup>2+</sup> | y <sup>3+</sup> |
|---------|-----------------|-----------------|-----------------|----|--------|----|-----------------|-----------------|-----------------|
|         | 115.0502        | 58.0287         | 39.0216         | 1  | N      | 27 |                 |                 |                 |
|         | 262.1186        | 131.5629        | 88.0444         | 2  | F      | 26 | 3108.3568       | 1554.6821       | 1036.7905       |
|         | 377.1456        | 189.0764        | 126.3867        | 3  | D      | 25 | 2961.2884       | 1481.1478       | 987.7677        |
|         | 491.1885        | 246.0979        | 164.4010        | 4  | N      | 24 | 2846.2615       | 1423.6344       | 949.4253        |
|         | 590.2569        | 295.6321        | 197.4238        | 5  | V      | 23 | 2732.2185       | 1366.6129       | 911.4110        |
|         | 687.3097        | 344.1585        | 229.7747        | 6  | P      | 22 | 2633.1501       | 1317.0787       | 878.3882        |
|         | 758.3468        | 379.6770        | 253.4538        | 7  | A      | 21 | 2536.0974       | 1268.5523       | 846.0373        |
|         | 887.3894        | 444.1983        | 296.4680        | 8  | E      | 20 | 2465.0603       | 1233.0338       | 822.3583        |
|         | 1016.4320       | 508.7196        | 339.4822        | 9  | E      | 19 | 2336.0177       | 1168.5125       | 779.3441        |
|         | 1145.4745       | 573.2409        | 382.4964        | 10 | E      | 18 | 2206.9751       | 1103.9912       | 736.3299        |
|         | 1274.5171       | 637.7622        | 425.5106        | 11 | E      | 17 | 2077.9325       | 1039.4699       | 693.3157        |
|         | 1387.6012       | 694.3042        | 463.2053        | 12 | I      | 16 | 1948.8899       | 974.9486        | 650.3015        |
|         | 1515.6961       | 758.3517        | 505.9036        | 13 | K      | 15 | 1835.8058       | 918.4066        | 612.6068        |
|         | 1644.7387       | 822.8730        | 548.9178        | 14 | E      | 14 | 1707.7109       | 854.3591        | 569.9085        |
|         | 1773.7813       | 887.3943        | 591.9320        | 15 | E      | 13 | 1578.6683       | 789.8378        | 526.8943        |
|         | 1874.8290       | 937.9181        | 625.6145        | 16 | T      | 12 | 1449.6257       | 725.3165        | 483.8801        |
|         | 1971.8818       | 986.4445        | 657.9654        | 17 | P      | 11 | 1348.5780       | 674.7927        | 450.1975        |
|         | 2042.9189       | 1021.9631       | 681.6445        | 18 | A      | 10 | 1251.5253       | 626.2663        | 417.8466        |
|         | 2171.9615       | 1086.4844       | 724.6587        | 19 | E      | 9  | 1180.4882       | 590.7477        | 394.1676        |
|         | 2300.0564       | 1150.5319       | 767.3570        | 20 | K      | 8  | 1051.4456       | 526.2264        | 351.1534        |
|         | 2415.0834       | 1208.0453       | 805.6993        | 21 | D      | 7  | 923.3506        | 462.1789        | 308.4551        |
|         | 2552.1423       | 1276.5748       | 851.3856        | 22 | H      | 6  | 808.3237        | 404.6655        | 270.1127        |
|         | 2681.1849       | 1341.0961       | 894.3998        | 23 | E      | 5  | 671.2648        | 336.1360        | 224.4264        |
|         | 2796.2118       | 1398.6095       | 932.7421        | 24 | D      | 4  | 542.2222        | 271.6147        | 181.4122        |
|         | 2895.2802       | 1448.1437       | 965.7649        | 25 | V      | 3  | 427.1952        | 214.1013        | 143.0699        |
|         | 3076.2942       | 1538.6508       | 1026.1029       | 26 | T[181] | 2  | 328.1268        | 164.5670        | 110.0471        |
|         |                 |                 |                 | 27 | K      | 1  | 147.1128        | 74.0600         | 49.7091         |

# Annotated spectra from Saleem et. al. 2009

R.NFHLS<sub>167</sub>QR<sub>166</sub>S/2

0.8414

1e+04

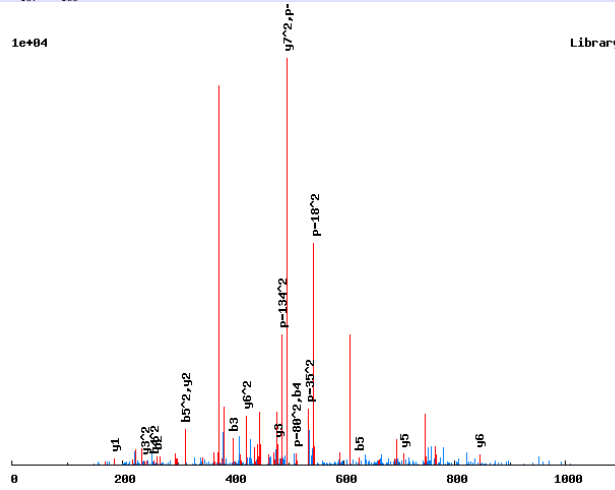

| Library | b <sup>1+</sup> | b <sup>2+</sup> | # | AA      | # | y <sup>1+</sup> | y <sup>2+</sup> |
|---------|-----------------|-----------------|---|---------|---|-----------------|-----------------|
|         | 115.0502        | 58.0287         | 1 | N       | 8 |                 |                 |
|         | 262.1186        | 131.5629        | 2 | F       | 7 | 991.4385        | 496.2229        |
|         | 399.1775        | 200.0924        | 3 | H       | 6 | 844.3701        | 422.6887        |
|         | 513.2205        | 257.1139        | 4 | N       | 5 | 707.3112        | 354.1592        |
|         | 626.3045        | 313.6559        | 5 | L       | 4 | 593.2682        | 297.1378        |
|         | 793.3029        | 397.1551        | 6 | S [167] | 3 | 480.1842        | 240.5957        |
|         | 921.3615        | 461.1844        | 7 | Q       | 2 | 313.1858        | 157.0965        |
|         |                 |                 | 8 | R [166] | 1 | 185.1272        | 93.0672         |

# Annotated spectra from Saleem et. al. 2009

K.NFSAPNVSSSS<sub>167</sub>NS<sub>167</sub>LRS<sub>167</sub>LGSPSVSSSK.K/3

0.9763

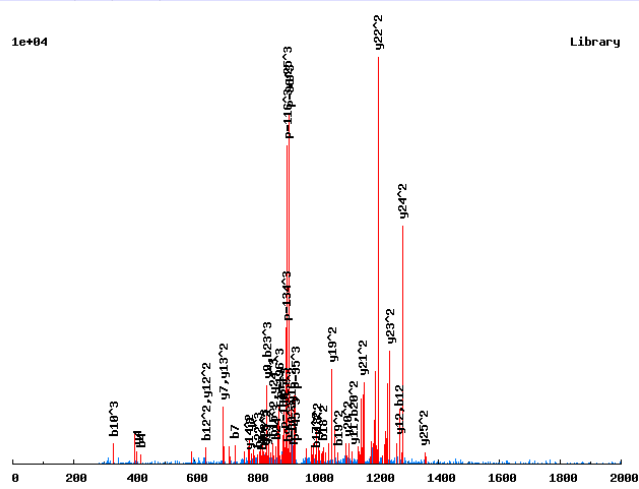

| Library | b <sup>1+</sup> | b <sup>2+</sup> | b <sup>3+</sup> | #  | AA     | #  | y <sup>1+</sup> | y <sup>2+</sup> | y <sup>3+</sup> |
|---------|-----------------|-----------------|-----------------|----|--------|----|-----------------|-----------------|-----------------|
|         | 115.0502        | 58.0287         | 39.0216         | 1  | N      | 26 |                 |                 |                 |
|         | 262.1186        | 131.5629        | 88.0444         | 2  | F      | 25 | 2709.1206       | 1355.0639       | 903.7117        |
|         | 349.1506        | 175.0790        | 117.0551        | 3  | S      | 24 | 2562.0522       | 1281.5297       | 854.6889        |
|         | 420.1878        | 210.5975        | 140.7341        | 4  | A      | 23 | 2475.0201       | 1238.0137       | 825.6782        |
|         | 517.2405        | 259.1239        | 173.0850        | 5  | P      | 22 | 2403.9830       | 1202.4951       | 801.9992        |
|         | 631.2835        | 316.1454        | 211.0993        | 6  | N      | 21 | 2306.9303       | 1153.9688       | 769.6483        |
|         | 730.3519        | 365.6796        | 244.1221        | 7  | V      | 20 | 2192.8873       | 1096.9473       | 731.6340        |
|         | 817.3839        | 409.1956        | 273.1328        | 8  | S      | 19 | 2093.8189       | 1047.4131       | 698.6112        |
|         | 904.4159        | 452.7116        | 302.1435        | 9  | S      | 18 | 2006.7869       | 1003.8971       | 669.6005        |
|         | 991.4479        | 496.2276        | 331.1542        | 10 | S      | 17 | 1919.7549       | 960.3811        | 640.5898        |
|         | 1158.4463       | 579.7268        | 386.8203        | 11 | S[167] | 16 | 1832.7228       | 916.8651        | 611.5791        |
|         | 1272.4892       | 636.7483        | 424.8346        | 12 | N      | 15 | 1665.7245       | 833.3659        | 555.9130        |
|         | 1439.4876       | 720.2474        | 480.5007        | 13 | S[167] | 14 | 1551.6815       | 776.3444        | 517.8987        |
|         | 1552.5717       | 776.7895        | 518.1954        | 14 | L      | 13 | 1384.6832       | 692.8452        | 462.2326        |
|         | 1708.6728       | 854.8400        | 570.2291        | 15 | R      | 12 | 1271.5991       | 636.3032        | 424.5379        |
|         | 1875.6711       | 938.3392        | 625.8952        | 16 | S[167] | 11 | 1115.4980       | 558.2526        | 372.5042        |
|         | 1988.7552       | 994.8812        | 663.5899        | 17 | L      | 10 | 948.4996        | 474.7535        | 316.8381        |
|         | 2045.7767       | 1023.3920       | 682.5971        | 18 | G      | 9  | 835.4156        | 418.2114        | 279.1434        |
|         | 2132.8087       | 1066.9080       | 711.6077        | 19 | S      | 8  | 778.3941        | 389.7007        | 260.1362        |
|         | 2229.8614       | 1115.4344       | 743.9587        | 20 | P      | 7  | 691.3621        | 346.1847        | 231.1256        |
|         | 2316.8935       | 1158.9504       | 772.9693        | 21 | S      | 6  | 594.3093        | 297.6583        | 198.7746        |
|         | 2415.9619       | 1208.4846       | 805.9921        | 22 | V      | 5  | 507.2773        | 254.1423        | 169.7640        |
|         | 2502.9939       | 1252.0006       | 835.0028        | 23 | S      | 4  | 408.2089        | 204.6081        | 136.7411        |
|         | 2590.0259       | 1295.5166       | 864.0135        | 24 | S      | 3  | 321.1769        | 161.0921        | 107.7305        |
|         | 2677.0580       | 1339.0326       | 893.0242        | 25 | S      | 2  | 234.1448        | 117.5761        | 78.7198         |
|         |                 |                 |                 | 26 | K      | 1  | 147.1128        | 74.0600         | 49.7091         |

# Annotated spectra from Saleem et. al. 2009

K.NFSAPNV<sub>167</sub>SSNSLR<sub>166</sub>S<sub>167</sub>LGSPSVSSK<sub>136</sub>K/3

0.7928

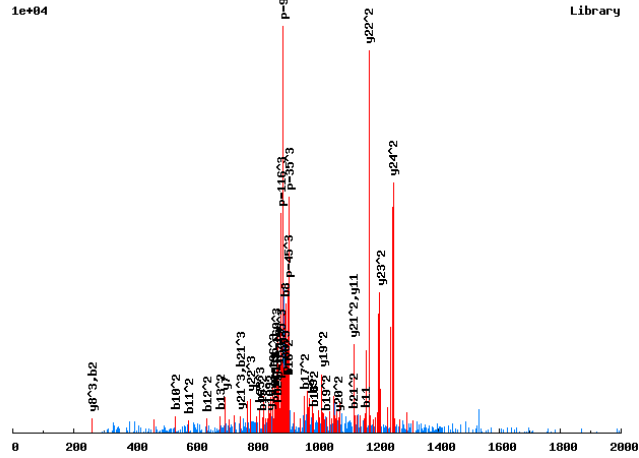

| Library | b <sup>1+</sup>  | b <sup>2+</sup>  | b <sup>3+</sup> | #  | AA     | #  | y <sup>1+</sup>  | y <sup>2+</sup>  | y <sup>3+</sup> |
|---------|------------------|------------------|-----------------|----|--------|----|------------------|------------------|-----------------|
|         | 115.0502         | 58.0287          | 39.0216         | 1  | N      | 26 |                  |                  |                 |
|         | <b>262.1186</b>  | 131.5629         | 88.0444         | 2  | F      | 25 | 2647.1767        | 1324.0920        | <b>883.0638</b> |
|         | 349.1506         | 175.0790         | 117.0551        | 3  | S      | 24 | 2500.1083        | <b>1250.5578</b> | 834.0409        |
|         | 420.1878         | 210.5975         | 140.7341        | 4  | A      | 23 | 2413.0763        | <b>1207.0418</b> | 805.0303        |
|         | 517.2405         | 259.1239         | 173.0850        | 5  | P      | 22 | 2342.0392        | <b>1171.5232</b> | <b>781.3512</b> |
|         | 631.2835         | 316.1454         | 211.0993        | 6  | N      | 21 | 2244.9864        | <b>1122.9968</b> | <b>749.0003</b> |
|         | 730.3519         | 365.6796         | 244.1221        | 7  | V      | 20 | 2130.9435        | <b>1065.9754</b> | 710.9860        |
|         | <b>897.3502</b>  | 449.1788         | 299.7883        | 8  | S[167] | 19 | 2031.8751        | <b>1016.4412</b> | 677.9632        |
|         | <b>984.3823</b>  | 492.6948         | 328.7989        | 9  | S      | 18 | 1864.8767        | 932.9420         | 622.2971        |
|         | 1071.4143        | <b>536.2108</b>  | 357.8096        | 10 | S      | 17 | 1777.8447        | <b>889.4260</b>  | 593.2864        |
|         | <b>1158.4463</b> | <b>579.7268</b>  | 386.8203        | 11 | S      | 16 | 1690.8126        | <b>845.9100</b>  | 564.2757        |
|         | 1272.4892        | <b>636.7483</b>  | 424.8346        | 12 | N      | 15 | 1603.7806        | 802.3939         | 535.2651        |
|         | 1359.5213        | <b>680.2643</b>  | 453.8453        | 13 | S      | 14 | 1489.7377        | 745.3725         | 497.2507        |
|         | 1472.6053        | 736.8063         | 491.5400        | 14 | L      | 13 | 1402.7056        | 701.8565         | 468.2401        |
|         | 1638.7147        | <b>819.8610</b>  | 546.9098        | 15 | R[166] | 12 | 1289.6216        | 645.3144         | 430.5454        |
|         | 1805.7131        | <b>903.3602</b>  | 602.5759        | 16 | S[167] | 11 | <b>1123.5122</b> | 562.2597         | 375.1756        |
|         | 1918.7971        | <b>959.9022</b>  | 640.2706        | 17 | L      | 10 | 956.5138         | 478.7606         | 319.5095        |
|         | 1975.8186        | <b>988.4129</b>  | 659.2777        | 18 | G      | 9  | <b>843.4298</b>  | 422.2185         | 281.8148        |
|         | 2062.8506        | <b>1031.9290</b> | 688.2884        | 19 | S      | 8  | 786.4083         | 393.7078         | <b>262.8076</b> |
|         | 2159.9034        | 1080.4553        | 720.6393        | 20 | P      | 7  | <b>699.3763</b>  | 350.1918         | 233.7969        |
|         | 2246.9354        | <b>1123.9713</b> | <b>749.6500</b> | 21 | S      | 6  | 602.3235         | 301.6654         | 201.4460        |
|         | 2346.0038        | 1173.5056        | 782.6728        | 22 | V      | 5  | 515.2915         | 258.1494         | 172.4354        |
|         | 2433.0359        | 1217.0216        | <b>811.6835</b> | 23 | S      | 4  | 416.2231         | 208.6152         | 139.4125        |
|         | 2520.0679        | 1260.5376        | 840.6941        | 24 | S      | 3  | 329.1911         | 165.0992         | 110.4019        |
|         | 2607.0999        | 1304.0536        | <b>869.7048</b> | 25 | S      | 2  | 242.1590         | 121.5832         | 81.3912         |
|         |                  |                  |                 | 26 | K[136] | 1  | 155.1270         | 78.0671          | 52.3805         |



Annotated spectra from Saleem et. al. 2009

R.NFSTTAT<sub>181</sub>AAT<sub>181</sub>GESKFDINDNC<sub>160</sub>NR.I/3

0.6343

1e+04

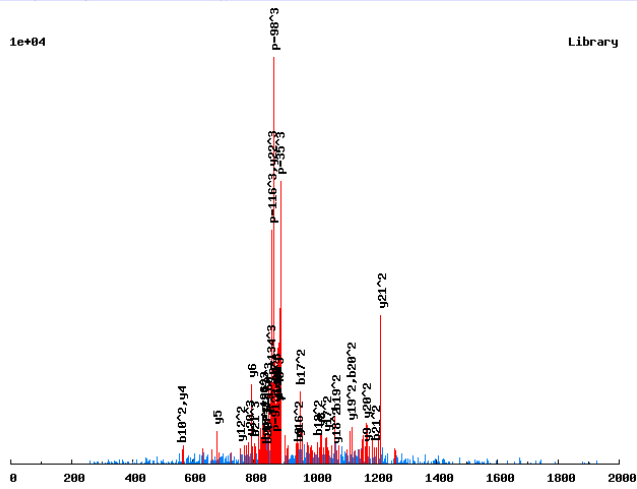

| Library | b <sup>1+</sup> | b <sup>2+</sup> | b <sup>3+</sup> | #  | AA     | #  | y <sup>1+</sup> | y <sup>2+</sup> | y <sup>3+</sup> |
|---------|-----------------|-----------------|-----------------|----|--------|----|-----------------|-----------------|-----------------|
|         | 115.0502        | 58.0287         | 39.0216         | 1  | N      | 23 |                 |                 |                 |
|         | 262.1186        | 131.5629        | 88.0444         | 2  | F      | 22 | 2580.0109       | 1290.5091       | 860.6752        |
|         | 349.1506        | 175.0790        | 117.0551        | 3  | S      | 21 | 2432.9425       | 1216.9749       | 811.6524        |
|         | 450.1983        | 225.6028        | 150.7376        | 4  | T      | 20 | 2345.9105       | 1173.4589       | 782.6417        |
|         | 551.2460        | 276.1266        | 184.4202        | 5  | T      | 19 | 2244.8628       | 1122.9350       | 748.9591        |
|         | 622.2831        | 311.6452        | 208.0992        | 6  | A      | 18 | 2143.8151       | 1072.4112       | 715.2766        |
|         | 803.2971        | 402.1522        | 268.4372        | 7  | T[181] | 17 | 2072.7780       | 1036.8927       | 691.5975        |
|         | 874.3342        | 437.6708        | 292.1163        | 8  | A      | 16 | 1891.7640       | 946.3856        | 631.2595        |
|         | 945.3714        | 473.1893        | 315.7953        | 9  | A      | 15 | 1820.7269       | 910.8671        | 607.5805        |
|         | 1126.3854       | 563.6963        | 376.1333        | 10 | T[181] | 14 | 1749.6898       | 875.3485        | 583.9015        |
|         | 1183.4068       | 592.2071        | 395.1405        | 11 | G      | 13 | 1568.6758       | 784.8415        | 523.5634        |
|         | 1312.4494       | 656.7283        | 438.1547        | 12 | E      | 12 | 1511.6543       | 756.3308        | 504.5563        |
|         | 1399.4814       | 700.2444        | 467.1653        | 13 | S      | 11 | 1382.6117       | 691.8095        | 461.5421        |
|         | 1527.5764       | 764.2918        | 509.8637        | 14 | K      | 10 | 1295.5797       | 648.2935        | 432.5314        |
|         | 1674.6448       | 837.8260        | 558.8865        | 15 | F      | 9  | 1167.4847       | 584.2460        | 389.8331        |
|         | 1789.6718       | 895.3395        | 597.2288        | 16 | D      | 8  | 1020.4163       | 510.7118        | 340.8103        |
|         | 1902.7558       | 951.8815        | 634.9235        | 17 | I      | 7  | 905.3894        | 453.1983        | 302.4680        |
|         | 2016.7987       | 1008.9030       | 672.9378        | 18 | N      | 6  | 792.3053        | 396.6563        | 264.7733        |
|         | 2131.8257       | 1066.4165       | 711.2801        | 19 | D      | 5  | 678.2624        | 339.6348        | 226.7590        |
|         | 2245.8686       | 1123.4379       | 749.2944        | 20 | N      | 4  | 563.2355        | 282.1214        | 188.4167        |
|         | 2405.8993       | 1203.4533       | 802.6379        | 21 | C[160] | 3  | 449.1925        | 225.0999        | 150.4024        |
|         | 2519.9422       | 1260.4747       | 840.6523        | 22 | N      | 2  | 289.1619        | 145.0846        | 97.0588         |
|         |                 |                 |                 | 23 | R      | 1  | 175.1190        | 88.0631         | 59.0445         |

# Annotated spectra from Saleem et. al. 2009

K.NGES<sub>167</sub>DLSDY<sub>243</sub>GNSNTEETKK.A/2

0.9981

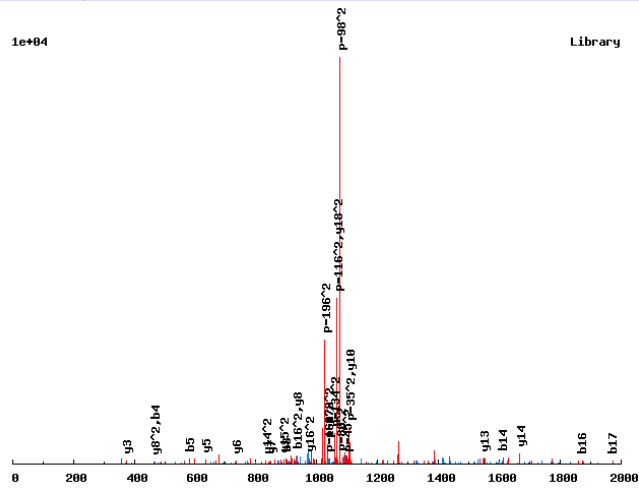

| Library | b <sup>1+</sup> | b <sup>2+</sup> | #  | AA      | #  | y <sup>1+</sup> | y <sup>2+</sup> |
|---------|-----------------|-----------------|----|---------|----|-----------------|-----------------|
|         | 115.0502        | 58.0287         | 1  | N       | 19 |                 |                 |
|         | 172.0717        | 86.5395         | 2  | G       | 18 | 2133.7897       | 1067.3985       |
|         | 301.1143        | 151.0608        | 3  | E       | 17 | 2076.7682       | 1038.8878       |
|         | 468.1126        | 234.5600        | 4  | S [167] | 16 | 1947.7256       | 974.3665        |
|         | 583.1396        | 292.0734        | 5  | D       | 15 | 1780.7273       | 890.8673        |
|         | 696.2236        | 348.6155        | 6  | L       | 14 | 1665.7003       | 833.3538        |
|         | 783.2557        | 392.1315        | 7  | S       | 13 | 1552.6163       | 776.8118        |
|         | 898.2826        | 449.6449        | 8  | D       | 12 | 1465.5843       | 733.2958        |
|         | 1141.3123       | 571.1598        | 9  | Y [243] | 11 | 1350.5573       | 675.7823        |
|         | 1198.3337       | 599.6705        | 10 | G       | 10 | 1107.5276       | 554.2675        |
|         | 1312.3766       | 656.6920        | 11 | N       | 9  | 1050.5062       | 525.7567        |
|         | 1399.4087       | 700.2080        | 12 | S       | 8  | 936.4633        | 468.7353        |
|         | 1513.4516       | 757.2294        | 13 | N       | 7  | 849.4312        | 425.2193        |
|         | 1614.4993       | 807.7533        | 14 | T       | 6  | 735.3883        | 368.1978        |
|         | 1743.5419       | 872.2746        | 15 | E       | 5  | 634.3406        | 317.6740        |
|         | 1872.5845       | 936.7959        | 16 | E       | 4  | 505.2980        | 253.1527        |
|         | 1973.6321       | 987.3197        | 17 | T       | 3  | 376.2554        | 188.6314        |
|         | 2101.7271       | 1051.3672       | 18 | K       | 2  | 275.2078        | 138.1075        |
|         |                 |                 | 19 | K       | 1  | 147.1128        | 74.0600         |

# Annotated spectra from Saleem et. al. 2009

R.NGNEHLS<sub>167</sub>S<sub>167</sub>DGDVSEQK<sub>136</sub>DDEFK<sub>136</sub>V/3

0.8116

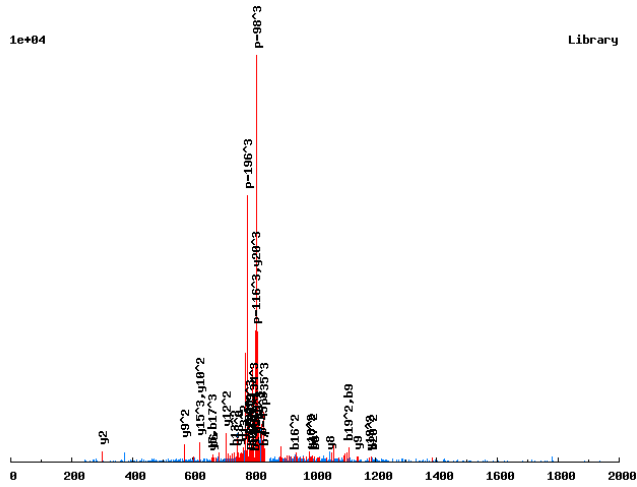

| Library | b <sup>1+</sup> | b <sup>2+</sup> | b <sup>3+</sup> | #  | AA     | #  | y <sup>1+</sup> | y <sup>2+</sup> | y <sup>3+</sup> |
|---------|-----------------|-----------------|-----------------|----|--------|----|-----------------|-----------------|-----------------|
|         | 115.0502        | 58.0287         | 39.0216         | 1  | N      | 21 |                 |                 |                 |
|         | 172.0717        | 86.5395         | 58.0287         | 2  | G      | 20 | 2411.9247       | 1206.4660       | 804.6464        |
|         | 286.1146        | 143.5609        | 96.0431         | 3  | N      | 19 | 2354.9032       | 1177.9552       | 785.6393        |
|         | 415.1572        | 208.0822        | 139.0572        | 4  | E      | 18 | 2240.8603       | 1120.9338       | 747.6249        |
|         | 552.2161        | 276.6117        | 184.7436        | 5  | H      | 17 | 2111.8177       | 1056.4125       | 704.6107        |
|         | 665.3002        | 333.1537        | 222.4382        | 6  | L      | 16 | 1974.7588       | 987.8830        | 658.9244        |
|         | 832.2985        | 416.6529        | 278.1044        | 7  | S[167] | 15 | 1861.6747       | 931.3410        | 621.2298        |
|         | 999.2969        | 500.1521        | 333.7705        | 8  | S[167] | 14 | 1694.6763       | 847.8418        | 565.5636        |
|         | 1114.3238       | 557.6656        | 372.1128        | 9  | D      | 13 | 1527.6780       | 764.3426        | 509.8975        |
|         | 1171.3453       | 586.1763        | 391.1199        | 10 | G      | 12 | 1412.6510       | 706.8292        | 471.5552        |
|         | 1286.3722       | 643.6898        | 429.4623        | 11 | D      | 11 | 1355.6296       | 678.3184        | 452.5480        |
|         | 1385.4406       | 693.2240        | 462.4851        | 12 | V      | 10 | 1240.6026       | 620.8050        | 414.2057        |
|         | 1472.4727       | 736.7400        | 491.4957        | 13 | S      | 9  | 1141.5342       | 571.2708        | 381.1829        |
|         | 1601.5153       | 801.2613        | 534.5099        | 14 | E      | 8  | 1054.5022       | 527.7547        | 352.1723        |
|         | 1729.5738       | 865.2906        | 577.1961        | 15 | Q      | 7  | 925.4596        | 463.2334        | 309.1581        |
|         | 1865.6830       | 933.3451        | 622.5659        | 16 | K[136] | 6  | 797.4010        | 399.2042        | 266.4719        |
|         | 1980.7099       | 990.8586        | 660.9082        | 17 | D      | 5  | 661.2919        | 331.1496        | 221.1021        |
|         | 2095.7369       | 1048.3721       | 699.2505        | 18 | D      | 4  | 546.2649        | 273.6361        | 182.7598        |
|         | 2224.7795       | 1112.8934       | 742.2647        | 19 | E      | 3  | 431.2380        | 216.1226        | 144.4175        |
|         | 2371.8479       | 1186.4276       | 791.2875        | 20 | F      | 2  | 302.1954        | 151.6013        | 101.4033        |
|         |                 |                 |                 | 21 | K[136] | 1  | 155.1270        | 78.0671         | 52.3805         |

# Annotated spectra from Saleem et. al. 2009

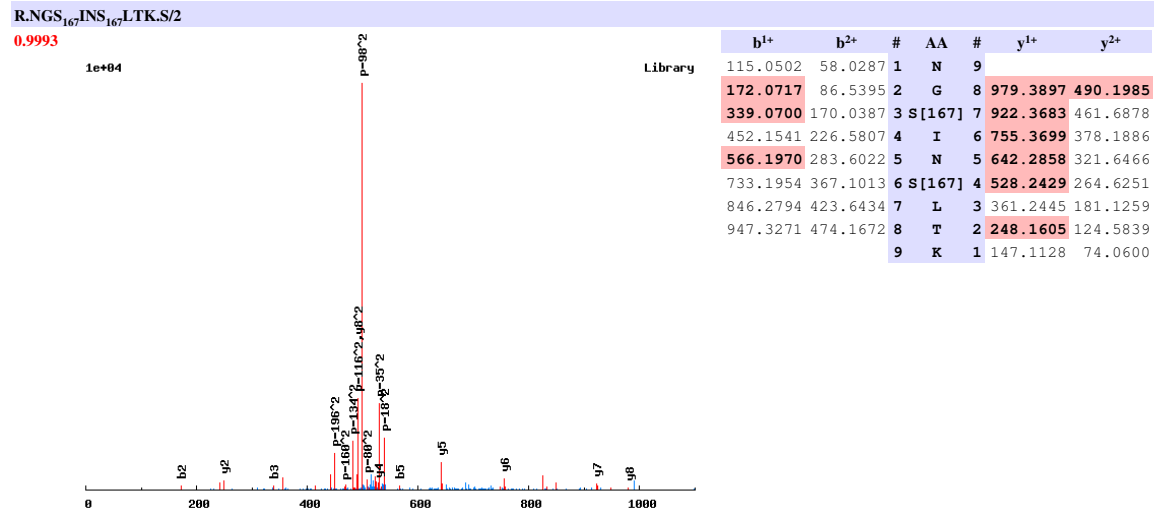

## Annotated spectra from Saleem et. al. 2009

R.NHS<sub>167</sub>-DSIS<sub>167</sub>-ASS<sub>167</sub>-LPK.F/2

0.9976

1e+04

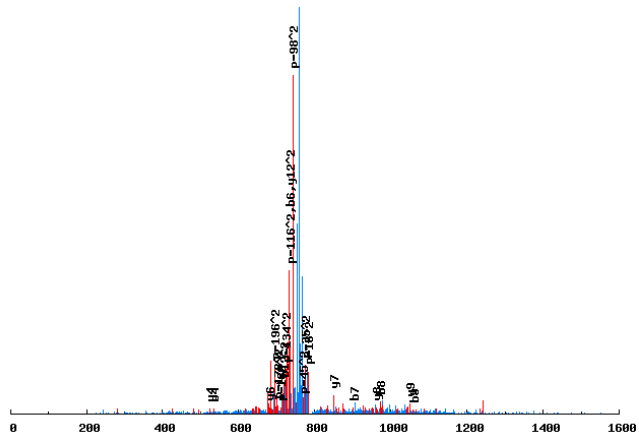

| Library | b <sup>1+</sup> | b <sup>2+</sup> | #  | AA     | #  | y <sup>1+</sup> | y <sup>2+</sup> |
|---------|-----------------|-----------------|----|--------|----|-----------------|-----------------|
|         | 115.0502        | 58.0287         | 1  | N      | 13 |                 |                 |
|         | 252.1091        | 126.5582        | 2  | H      | 12 | 1468.5158       | 734.7615        |
|         | 419.1075        | 210.0574        | 3  | S[167] | 11 | 1331.4569       | 666.2321        |
|         | 534.1344        | 267.5709        | 4  | D      | 10 | 1164.4585       | 582.7329        |
|         | 621.1665        | 311.0869        | 5  | S      | 9  | 1049.4316       | 525.2194        |
|         | 734.2505        | 367.6289        | 6  | I      | 8  | 962.3995        | 481.7034        |
|         | 901.2489        | 451.1281        | 7  | S[167] | 7  | 849.3155        | 425.1614        |
|         | 972.2860        | 486.6466        | 8  | A      | 6  | 682.3171        | 341.6622        |
|         | 1059.3180       | 530.1626        | 9  | S      | 5  | 611.2800        | 306.1436        |
|         | 1226.3164       | 613.6618        | 10 | S[167] | 4  | 524.2480        | 262.6276        |
|         | 1339.4004       | 670.2039        | 11 | L      | 3  | 357.2496        | 179.1284        |
|         | 1436.4532       | 718.7302        | 12 | P      | 2  | 244.1656        | 122.5864        |
|         |                 |                 | 13 | K      | 1  | 147.1128        | 74.0600         |

# Annotated spectra from Saleem et. al. 2009

R.NHSDS<sub>167</sub>-ISASS<sub>167</sub>-LPK<sub>136</sub>-F/2

0.94

1e+04

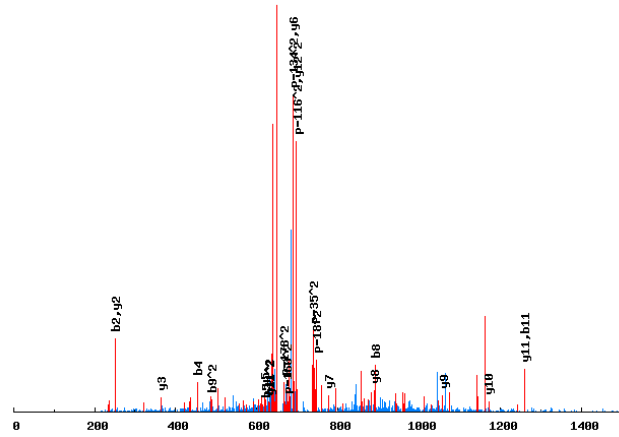

| Library | b <sup>1+</sup> | b <sup>2+</sup> | #  | AA     | #  | y <sup>1+</sup> | y <sup>2+</sup> |
|---------|-----------------|-----------------|----|--------|----|-----------------|-----------------|
|         | 115.0502        | 58.0287         | 1  | N      | 13 |                 |                 |
|         | 252.1091        | 126.5582        | 2  | H      | 12 | 1396.5637       | 698.7855        |
|         | 339.1411        | 170.0742        | 3  | S      | 11 | 1259.5047       | 630.2560        |
|         | 454.1681        | 227.5877        | 4  | D      | 10 | 1172.4727       | 586.7400        |
|         | 621.1665        | 311.0869        | 5  | S[167] | 9  | 1057.4458       | 529.2265        |
|         | 734.2505        | 367.6289        | 6  | I      | 8  | 890.4474        | 445.7273        |
|         | 821.2825        | 411.1449        | 7  | S      | 7  | 777.3634        | 389.1853        |
|         | 892.3197        | 446.6635        | 8  | A      | 6  | 690.3313        | 345.6693        |
|         | 979.3517        | 490.1795        | 9  | S      | 5  | 619.2942        | 310.1507        |
|         | 1146.3500       | 573.6787        | 10 | S[167] | 4  | 532.2622        | 266.6347        |
|         | 1259.4341       | 630.2207        | 11 | L      | 3  | 365.2638        | 183.1355        |
|         | 1356.4869       | 678.7471        | 12 | P      | 2  | 252.1798        | 126.5935        |
|         |                 |                 | 13 | K[136] | 1  | 155.1270        | 78.0671         |

# Annotated spectra from Saleem et. al. 2009

K.NHTS<sub>167</sub>VES<sub>167</sub>LNGSTRPPFK.I/3

0.6013

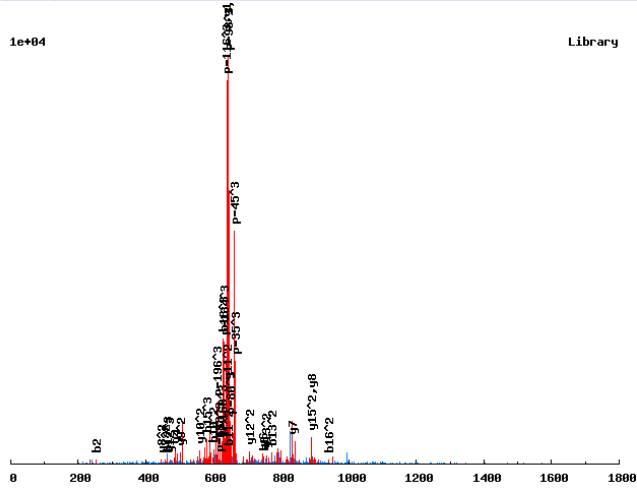

| Library | b <sup>1+</sup> | b <sup>2+</sup> | b <sup>3+</sup> | #  | AA     | #  | y <sup>1+</sup> | y <sup>2+</sup> | y <sup>3+</sup> |
|---------|-----------------|-----------------|-----------------|----|--------|----|-----------------|-----------------|-----------------|
|         | 115.0502        | 58.0287         | 39.0216         | 1  | N      | 17 |                 |                 |                 |
|         | <b>252.1091</b> | 126.5582        | 84.7079         | 2  | H      | 16 | 1916.8303       | 958.9188        | <b>639.6150</b> |
|         | 353.1568        | 177.0820        | 118.3905        | 3  | T      | 15 | 1779.7714       | <b>890.3893</b> | 593.9287        |
|         | 520.1552        | 260.5812        | 174.0566        | 4  | S[167] | 14 | 1678.7237       | 839.8655        | 560.2461        |
|         | <b>619.2236</b> | 310.1154        | 207.0794        | 5  | V      | 13 | 1511.7254       | <b>756.3663</b> | 504.5800        |
|         | <b>748.2662</b> | 374.6367        | 250.0936        | 6  | E      | 12 | 1412.6570       | <b>706.8321</b> | <b>471.5572</b> |
|         | 915.2645        | <b>458.1359</b> | 305.7597        | 7  | S[167] | 11 | 1283.6144       | <b>642.3108</b> | 428.5430        |
|         | 1028.3486       | 514.6779        | 343.4544        | 8  | L      | 10 | 1116.6160       | <b>558.8116</b> | 372.8769        |
|         | 1142.3915       | 571.6994        | 381.4687        | 9  | N      | 9  | 1003.5319       | <b>502.2696</b> | 335.1822        |
|         | 1199.4130       | <b>600.2101</b> | 400.4758        | 10 | G      | 8  | <b>889.4890</b> | <b>445.2481</b> | 297.1679        |
|         | 1286.4450       | <b>643.7261</b> | 429.4865        | 11 | S      | 7  | <b>832.4676</b> | 416.7374        | 278.1607        |
|         | 1387.4927       | 694.2500        | <b>463.1691</b> | 12 | T      | 6  | <b>745.4355</b> | 373.2214        | 249.1500        |
|         | 1543.5938       | <b>772.3005</b> | 515.2028        | 13 | R      | 5  | <b>644.3878</b> | 322.6976        | 215.4675        |
|         | 1640.6466       | 820.8269        | 547.5537        | 14 | P      | 4  | <b>488.2867</b> | 244.6470        | 163.4338        |
|         | 1737.6993       | 869.3533        | <b>579.9046</b> | 15 | P      | 3  | 391.2340        | 196.1206        | 131.0828        |
|         | 1884.7677       | <b>942.8875</b> | <b>628.9274</b> | 16 | F      | 2  | 294.1812        | 147.5942        | 98.7319         |
|         |                 |                 |                 | 17 | K      | 1  | 147.1128        | 74.0600         | 49.7091         |

# Annotated spectra from Saleem et. al. 2009

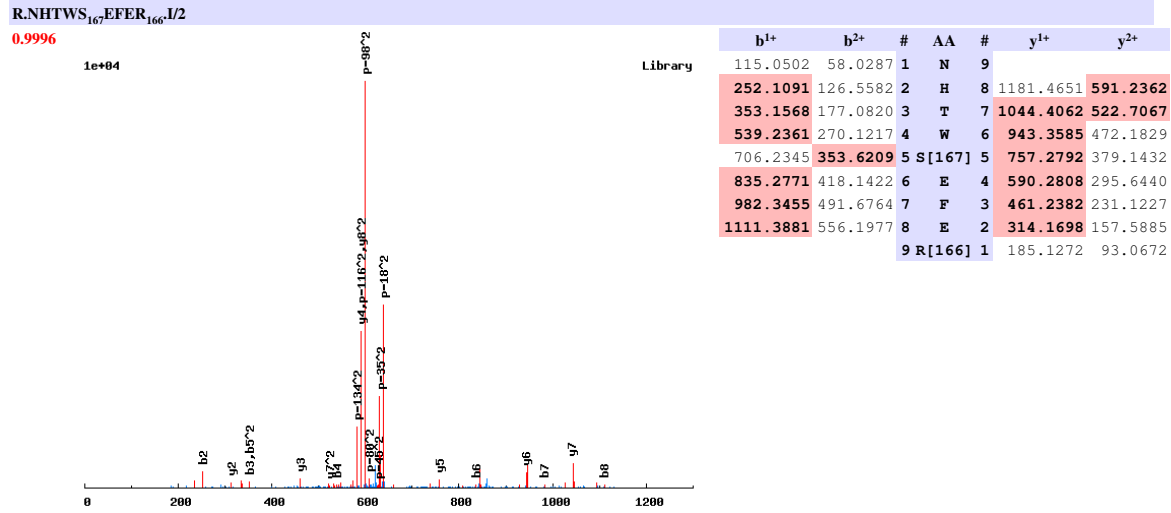



Annotated spectra from Saleem et. al. 2009

K.NISGISHS<sub>167</sub>APHS<sub>167</sub>PVNPNSLIK<sub>136</sub>R/3

0.9829

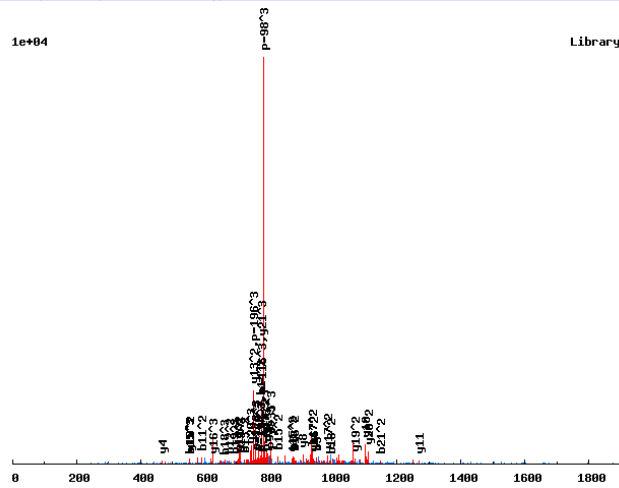

| Library | b <sup>1+</sup> | b <sup>2+</sup> | b <sup>3+</sup> | #  | AA     | #  | y <sup>1+</sup> | y <sup>2+</sup> | y <sup>3+</sup> |
|---------|-----------------|-----------------|-----------------|----|--------|----|-----------------|-----------------|-----------------|
|         | 115.0502        | 58.0287         | 39.0216         | 1  | N      | 22 |                 |                 |                 |
|         | 228.1343        | 114.5708        | 76.7163         | 2  | I      | 21 | 2336.1291       | 1168.5682       | 779.3812        |
|         | 315.1663        | 158.0868        | 105.7270        | 3  | S      | 20 | 2223.0450       | 1112.0261       | 741.6865        |
|         | 372.1878        | 186.5975        | 124.7341        | 4  | G      | 19 | 2136.0130       | 1068.5101       | 712.6758        |
|         | 485.2718        | 243.1395        | 162.4288        | 5  | I      | 18 | 2078.9915       | 1039.9994       | 693.6687        |
|         | 572.3039        | 286.6556        | 191.4395        | 6  | S      | 17 | 1965.9074       | 983.4574        | 655.9740        |
|         | 709.3628        | 355.1850        | 237.1258        | 7  | H      | 16 | 1878.8754       | 939.9413        | 626.9633        |
|         | 876.3611        | 438.6842        | 292.7919        | 8  | S[167] | 15 | 1741.8165       | 871.4119        | 581.2770        |
|         | 947.3982        | 474.2028        | 316.4709        | 9  | A      | 14 | 1574.8181       | 787.9127        | 525.6109        |
|         | 1044.4510       | 522.7291        | 348.8219        | 10 | P      | 13 | 1503.7810       | 752.3942        | 501.9319        |
|         | 1181.5099       | 591.2586        | 394.5082        | 11 | H      | 12 | 1406.7283       | 703.8678        | 469.5809        |
|         | 1348.5083       | 674.7578        | 450.1743        | 12 | S[167] | 11 | 1269.6694       | 635.3383        | 423.8946        |
|         | 1445.5610       | 723.2842        | 482.5252        | 13 | P      | 10 | 1102.6710       | 551.8391        | 368.2285        |
|         | 1544.6294       | 772.8184        | 515.5480        | 14 | V      | 9  | 1005.6182       | 503.3128        | 335.8776        |
|         | 1658.6724       | 829.8398        | 553.5623        | 15 | N      | 8  | 906.5498        | 453.7786        | 302.8548        |
|         | 1755.7251       | 878.3662        | 585.9132        | 16 | P      | 7  | 792.5069        | 396.7571        | 264.8405        |
|         | 1869.7681       | 935.3877        | 623.9275        | 17 | N      | 6  | 695.4541        | 348.2307        | 232.4896        |
|         | 1982.8521       | 991.9297        | 661.6222        | 18 | I      | 5  | 581.4112        | 291.2092        | 194.4753        |
|         | 2069.8841       | 1035.4457       | 690.6329        | 19 | S      | 4  | 468.3271        | 234.6672        | 156.7806        |
|         | 2182.9682       | 1091.9877       | 728.3276        | 20 | L      | 3  | 381.2951        | 191.1512        | 127.7699        |
|         | 2296.0523       | 1148.5298       | 766.0223        | 21 | I      | 2  | 268.2111        | 134.6092        | 90.0752         |
|         |                 |                 |                 | 22 | K[136] | 1  | 155.1270        | 78.0671         | 52.3805         |

# Annotated spectra from Saleem et. al. 2009

R.NIS<sub>167</sub>KTPS<sub>167</sub>MK.N/2

0.8688

1e+04

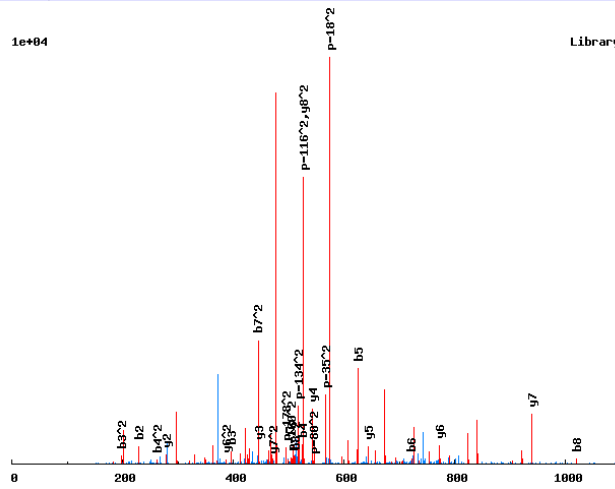

Library

| b <sup>1+</sup> | b <sup>2+</sup> | # | AA      | # | y <sup>1+</sup> | y <sup>2+</sup> |
|-----------------|-----------------|---|---------|---|-----------------|-----------------|
| 115.0502        | 58.0287         | 1 | N       | 9 |                 |                 |
| 228.1343        | 114.5708        | 2 | I       | 8 | 1051.4295       | 526.2184        |
| 395.1326        | 198.0700        | 3 | S [167] | 7 | 938.3454        | 469.6763        |
| 523.2276        | 262.1174        | 4 | K       | 6 | 771.3471        | 386.1772        |
| 624.2753        | 312.6413        | 5 | T       | 5 | 643.2521        | 322.1297        |
| 721.3280        | 361.1677        | 6 | P       | 4 | 542.2044        | 271.6058        |
| 888.3264        | 444.6668        | 7 | S [167] | 3 | 445.1517        | 223.0795        |
| 1019.3669       | 510.1871        | 8 | M       | 2 | 278.1533        | 139.5803        |
|                 |                 | 9 | K       | 1 | 147.1128        | 74.0600         |

# Annotated spectra from Saleem et. al. 2009

R.NIS<sub>167</sub>TSS<sub>167</sub>VTTSPVESTK.N/2

0.9944

1e+04

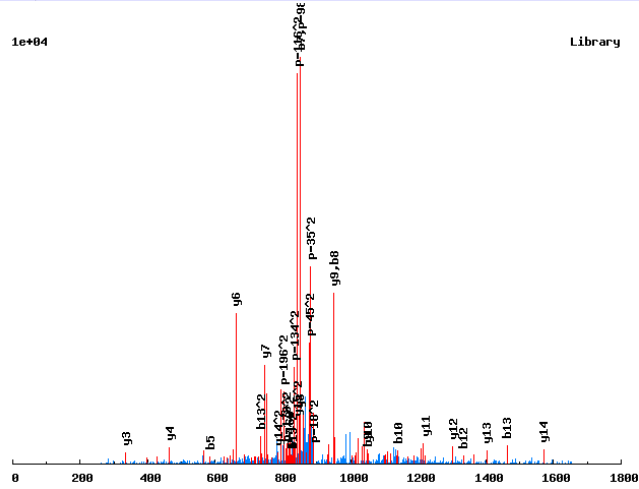

| Library | b <sup>1+</sup> | b <sup>2+</sup> | #  | AA     | #  | y <sup>1+</sup> | y <sup>2+</sup> |
|---------|-----------------|-----------------|----|--------|----|-----------------|-----------------|
|         | 115.0502        | 58.0287         | 1  | N      | 16 |                 |                 |
|         | 228.1343        | 114.5708        | 2  | I      | 15 | 1683.7126       | 842.3599        |
|         | 395.1326        | 198.0700        | 3  | S[167] | 14 | 1570.6285       | 785.8179        |
|         | 496.1803        | 248.5938        | 4  | T      | 13 | 1403.6301       | 702.3187        |
|         | 583.2123        | 292.1098        | 5  | S      | 12 | 1302.5825       | 651.7949        |
|         | 750.2107        | 375.6090        | 6  | S[167] | 11 | 1215.5504       | 608.2789        |
|         | 849.2791        | 425.1432        | 7  | V      | 10 | 1048.5521       | 524.7797        |
|         | 950.3268        | 475.6670        | 8  | T      | 9  | 949.4837        | 475.2455        |
|         | 1051.3745       | 526.1909        | 9  | T      | 8  | 848.4360        | 424.7216        |
|         | 1138.4065       | 569.7069        | 10 | S      | 7  | 747.3883        | 374.1978        |
|         | 1235.4593       | 618.2333        | 11 | P      | 6  | 660.3563        | 330.6818        |
|         | 1334.5277       | 667.7675        | 12 | V      | 5  | 563.3035        | 282.1554        |
|         | 1463.5703       | 732.2888        | 13 | E      | 4  | 464.2351        | 232.6212        |
|         | 1550.6023       | 775.8048        | 14 | S      | 3  | 335.1925        | 168.0999        |
|         | 1651.6500       | 826.3286        | 15 | T      | 2  | 248.1605        | 124.5839        |
|         |                 |                 | 16 | K      | 1  | 147.1128        | 74.0600         |

# Annotated spectra from Saleem et. al. 2009

K.NIVLFPEEESFS<sub>167</sub>RPQS<sub>167</sub>AQS<sub>167</sub>QSR.S/3

0.9999

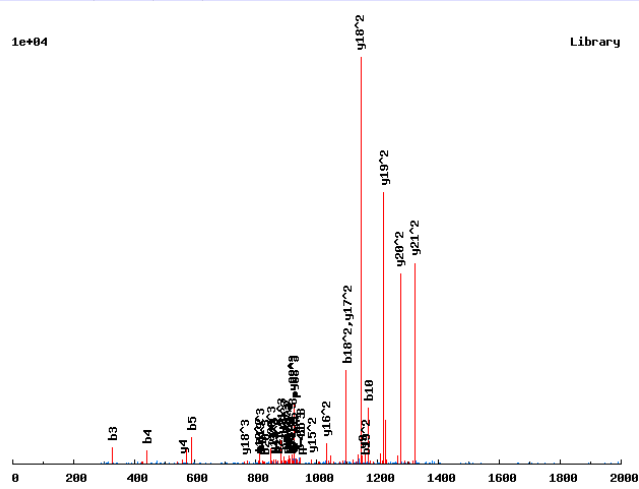

| Library | b <sup>1+</sup> | b <sup>2+</sup> | b <sup>3+</sup> | #  | AA     | #  | y <sup>1+</sup> | y <sup>2+</sup> | y <sup>3+</sup> |
|---------|-----------------|-----------------|-----------------|----|--------|----|-----------------|-----------------|-----------------|
|         | 115.0502        | 58.0287         | 39.0216         | 1  | N      | 23 |                 |                 |                 |
|         | 228.1343        | 114.5708        | 76.7163         | 2  | I      | 22 | 2759.1515       | 1380.0794       | 920.3887        |
|         | 327.2027        | 164.1050        | 109.7391        | 3  | V      | 21 | 2646.0674       | 1323.5373       | 882.6940        |
|         | 440.2867        | 220.6470        | 147.4338        | 4  | L      | 20 | 2546.9990       | 1274.0031       | 849.6712        |
|         | 587.3551        | 294.1812        | 196.4566        | 5  | F      | 19 | 2433.9149       | 1217.4611       | 811.9765        |
|         | 684.4079        | 342.7076        | 228.8075        | 6  | P      | 18 | 2286.8465       | 1143.9269       | 762.9537        |
|         | 813.4505        | 407.2289        | 271.8217        | 7  | E      | 17 | 2189.7938       | 1095.4005       | 730.6028        |
|         | 910.5033        | 455.7553        | 304.1726        | 8  | P      | 16 | 2060.7512       | 1030.8792       | 687.5886        |
|         | 1039.5458       | 520.2766        | 347.1868        | 9  | E      | 15 | 1963.6984       | 982.3528        | 655.2377        |
|         | 1168.5884       | 584.7979        | 390.2010        | 10 | E      | 14 | 1834.6558       | 917.8315        | 612.2235        |
|         | 1255.6205       | 628.3139        | 419.2117        | 11 | S      | 13 | 1705.6132       | 853.3103        | 569.2093        |
|         | 1402.6889       | 701.8481        | 468.2345        | 12 | F      | 12 | 1618.5812       | 809.7942        | 540.1986        |
|         | 1569.6872       | 785.3473        | 523.9006        | 13 | S[167] | 11 | 1471.5128       | 736.2600        | 491.1758        |
|         | 1725.7884       | 863.3978        | 575.9343        | 14 | R      | 10 | 1304.5144       | 652.7609        | 435.5097        |
|         | 1822.8411       | 911.9242        | 608.2852        | 15 | P      | 9  | 1148.4133       | 574.7103        | 383.4760        |
|         | 1950.8997       | 975.9535        | 650.9714        | 16 | Q      | 8  | 1051.3606       | 526.1839        | 351.1250        |
|         | 2117.8981       | 1059.4527       | 706.6375        | 17 | S[167] | 7  | 923.3020        | 462.1546        | 308.4388        |
|         | 2188.9352       | 1094.9712       | 730.3166        | 18 | A      | 6  | 756.3036        | 378.6554        | 252.7727        |
|         | 2316.9937       | 1159.0005       | 773.0028        | 19 | Q      | 5  | 685.2665        | 343.1369        | 229.0937        |
|         | 2483.9921       | 1242.4997       | 828.6689        | 20 | S[167] | 4  | 557.2079        | 279.1076        | 186.4075        |
|         | 2612.0507       | 1306.5290       | 871.3551        | 21 | Q      | 3  | 390.2096        | 195.6084        | 130.7414        |
|         | 2699.0827       | 1350.0450       | 900.3658        | 22 | S      | 2  | 262.1510        | 131.5791        | 88.0552         |
|         |                 |                 |                 | 23 | R      | 1  | 175.1190        | 88.0631         | 59.0445         |

# Annotated spectra from Saleem et. al. 2009

K.NIVLPEPEESFS<sub>167</sub>R<sub>166</sub>QPS<sub>167</sub>AQSQR<sub>166</sub>S/3

0.9977

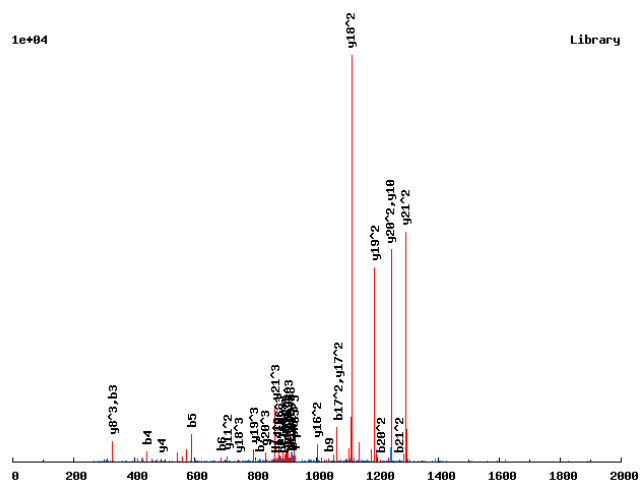

| Library | b <sup>1+</sup> | b <sup>2+</sup> | b <sup>3+</sup> | #  | AA     | #  | y <sup>1+</sup> | y <sup>2+</sup> | y <sup>3+</sup> |
|---------|-----------------|-----------------|-----------------|----|--------|----|-----------------|-----------------|-----------------|
|         | 115.0502        | 58.0287         | 39.0216         | 1  | N      | 23 |                 |                 |                 |
|         | 228.1343        | 114.5708        | 76.7163         | 2  | I      | 22 | 2699.2017       | 1350.1045       | 900.4054        |
|         | 327.2027        | 164.1050        | 109.7391        | 3  | V      | 21 | 2586.1176       | 1293.5624       | 862.7107        |
|         | 440.2867        | 220.6470        | 147.4338        | 4  | L      | 20 | 2487.0492       | 1244.0282       | 829.6879        |
|         | 587.3551        | 294.1812        | 196.4566        | 5  | F      | 19 | 2373.9651       | 1187.4862       | 791.9932        |
|         | 684.4079        | 342.7076        | 228.8075        | 6  | P      | 18 | 2226.8967       | 1113.9520       | 742.9704        |
|         | 813.4505        | 407.2289        | 271.8217        | 7  | E      | 17 | 2129.8440       | 1065.4256       | 710.6195        |
|         | 910.5033        | 455.7553        | 304.1726        | 8  | P      | 16 | 2000.8014       | 1000.9043       | 667.6053        |
|         | 1039.5458       | 520.2766        | 347.1868        | 9  | E      | 15 | 1903.7486       | 952.3779        | 635.2544        |
|         | 1168.5884       | 584.7979        | 390.2010        | 10 | E      | 14 | 1774.7060       | 887.8567        | 592.2402        |
|         | 1255.6205       | 628.3139        | 419.2117        | 11 | S      | 13 | 1645.6634       | 823.3354        | 549.2260        |
|         | 1402.6889       | 701.8481        | 468.2345        | 12 | F      | 12 | 1558.6314       | 779.8193        | 520.2153        |
|         | 1569.6872       | 785.3473        | 523.9006        | 13 | S[167] | 11 | 1411.5630       | 706.2851        | 471.1925        |
|         | 1735.7966       | 868.4020        | 579.2704        | 14 | R[166] | 10 | 1244.5646       | 622.7860        | 415.5264        |
|         | 1832.8494       | 916.9283        | 611.6213        | 15 | P      | 9  | 1078.4552       | 539.7313        | 360.1566        |
|         | 1960.9080       | 980.9576        | 654.3075        | 16 | Q      | 8  | 981.4025        | 491.2049        | 327.8057        |
|         | 2127.9063       | 1064.4568       | 709.9736        | 17 | S[167] | 7  | 853.3439        | 427.1756        | 285.1195        |
|         | 2198.9434       | 1099.9754       | 733.6527        | 18 | A      | 6  | 686.3455        | 343.6764        | 229.4534        |
|         | 2327.0020       | 1164.0046       | 776.3389        | 19 | Q      | 5  | 615.3084        | 308.1579        | 205.7743        |
|         | 2414.0340       | 1207.5207       | 805.3495        | 20 | S      | 4  | 487.2499        | 244.1286        | 163.0881        |
|         | 2542.0926       | 1271.5500       | 848.0357        | 21 | Q      | 3  | 400.2178        | 200.6126        | 134.0775        |
|         | 2629.1247       | 1315.0660       | 877.0464        | 22 | S      | 2  | 272.1592        | 136.5833        | 91.3913         |
|         |                 |                 |                 | 23 | R[166] | 1  | 185.1272        | 93.0672         | 62.3806         |

# Annotated spectra from Saleem et. al. 2009

K.NIYTNINNP<sub>167</sub>PS<sub>167</sub>PPSSK.Q/2

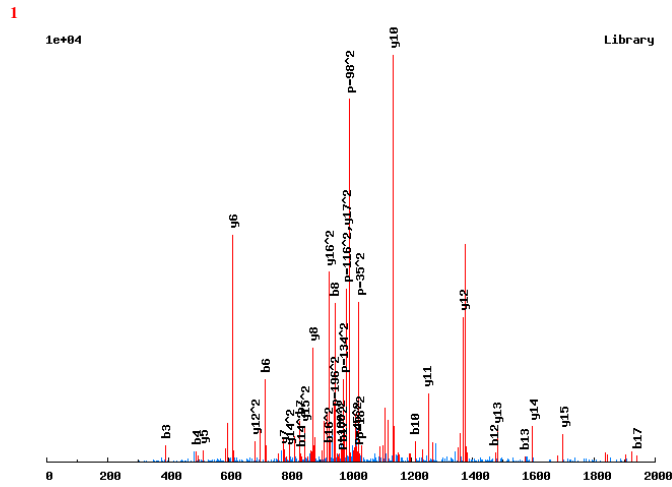

| b <sup>1+</sup> | b <sup>2+</sup> | #  | AA      | #  | y <sup>1+</sup> | y <sup>2+</sup> |
|-----------------|-----------------|----|---------|----|-----------------|-----------------|
| 115.0502        | 58.0287         | 1  | N       | 18 |                 |                 |
| 228.1343        | 114.5708        | 2  | I       | 17 | 1972.8453       | 986.9263        |
| 391.1976        | 196.1024        | 3  | Y       | 16 | 1859.7612       | 930.3843        |
| 492.2453        | 246.6263        | 4  | T       | 15 | 1696.6979       | 848.8526        |
| 606.2882        | 303.6477        | 5  | N       | 14 | 1595.6502       | 798.3288        |
| 719.3723        | 360.1898        | 6  | I       | 13 | 1481.6073       | 741.3073        |
| 833.4152        | 417.2112        | 7  | N       | 12 | 1368.5232       | 684.7653        |
| 947.4581        | 474.2327        | 8  | N       | 11 | 1254.4803       | 627.7438        |
| 1044.5109       | 522.7591        | 9  | P       | 10 | 1140.4374       | 570.7223        |
| 1211.5093       | 606.2583        | 10 | S [167] | 9  | 1043.3846       | 522.1960        |
| 1308.5620       | 654.7846        | 11 | P       | 8  | 876.3863        | 438.6968        |
| 1475.5604       | 738.2838        | 12 | S [167] | 7  | 779.3335        | 390.1704        |
| 1572.6131       | 786.8102        | 13 | P       | 6  | 612.3351        | 306.6712        |
| 1669.6659       | 835.3366        | 14 | P       | 5  | 515.2824        | 258.1448        |
| 1766.7187       | 883.8630        | 15 | P       | 4  | 418.2296        | 209.6184        |
| 1853.7507       | 927.3790        | 16 | S       | 3  | 321.1769        | 161.0921        |
| 1940.7827       | 970.8950        | 17 | S       | 2  | 234.1448        | 117.5761        |
|                 |                 | 18 | K       | 1  | 147.1128        | 74.0600         |

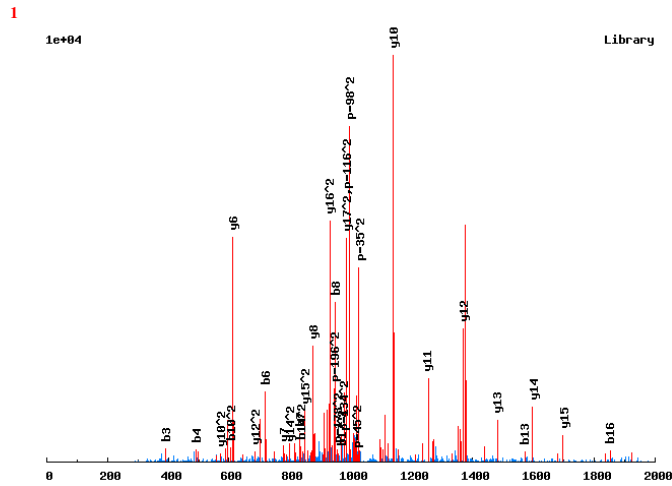

| b <sup>1+</sup> | b <sup>2+</sup> | #  | AA      | #  | y <sup>1+</sup> | y <sup>2+</sup> |
|-----------------|-----------------|----|---------|----|-----------------|-----------------|
| 115.0502        | 58.0287         | 1  | N       | 18 |                 |                 |
| 228.1343        | 114.5708        | 2  | I       | 17 | 1972.8453       | 986.9263        |
| 391.1976        | 196.1024        | 3  | Y       | 16 | 1859.7612       | 930.3843        |
| 492.2453        | 246.6263        | 4  | T       | 15 | 1696.6979       | 848.8526        |
| 606.2882        | 303.6477        | 5  | N       | 14 | 1595.6502       | 798.3288        |
| 719.3723        | 360.1898        | 6  | I       | 13 | 1481.6073       | 741.3073        |
| 833.4152        | 417.2112        | 7  | N       | 12 | 1368.5232       | 684.7653        |
| 947.4581        | 474.2327        | 8  | N       | 11 | 1254.4803       | 627.7438        |
| 1044.5109       | 522.7591        | 9  | P       | 10 | 1140.4374       | 570.7223        |
| 1211.5093       | 606.2583        | 10 | S [167] | 9  | 1043.3846       | 522.1960        |
| 1308.5620       | 654.7846        | 11 | P       | 8  | 876.3863        | 438.6968        |
| 1475.5604       | 738.2838        | 12 | S [167] | 7  | 779.3335        | 390.1704        |
| 1572.6131       | 786.8102        | 13 | P       | 6  | 612.3351        | 306.6712        |
| 1669.6659       | 835.3366        | 14 | P       | 5  | 515.2824        | 258.1448        |
| 1766.7187       | 883.8630        | 15 | P       | 4  | 418.2296        | 209.6184        |
| 1853.7507       | 927.3790        | 16 | S       | 3  | 321.1769        | 161.0921        |
| 1940.7827       | 970.8950        | 17 | S       | 2  | 234.1448        | 117.5761        |
|                 |                 | 18 | K       | 1  | 147.1128        | 74.0600         |

# Annotated spectra from Saleem et. al. 2009

R.NKNGSHS<sub>167</sub>DLVNLQR.S/3

0.6635

1e+04

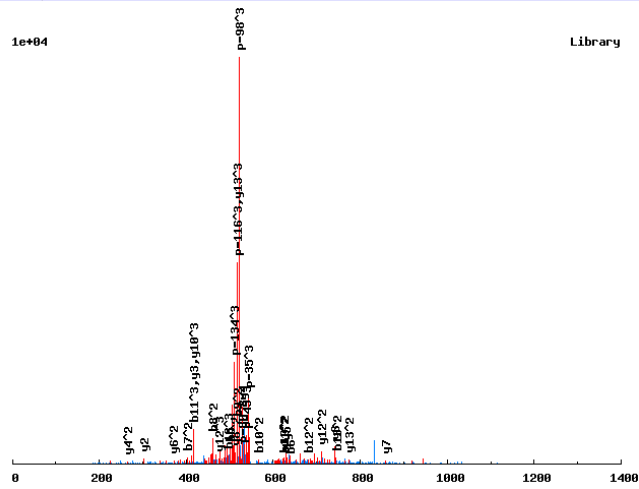

| Library | b <sup>1+</sup> | b <sup>2+</sup> | b <sup>3+</sup> | #  | AA     | #  | y <sup>1+</sup> | y <sup>2+</sup> | y <sup>3+</sup> |
|---------|-----------------|-----------------|-----------------|----|--------|----|-----------------|-----------------|-----------------|
|         | 115.0502        | 58.0287         | 39.0216         | 1  | N      | 14 |                 |                 |                 |
|         | 243.1452        | 122.0762        | 81.7199         | 2  | K      | 13 | 1547.7326       | 774.3699        | 516.5824        |
|         | 357.1881        | 179.0977        | 119.7342        | 3  | N      | 12 | 1419.6376       | 710.3225        | 473.8841        |
|         | 414.2096        | 207.6084        | 138.7414        | 4  | G      | 11 | 1305.5947       | 653.3010        | 435.8698        |
|         | 501.2416        | 251.1244        | 167.7520        | 5  | S      | 10 | 1248.5732       | 624.7903        | 416.8626        |
|         | 638.3005        | 319.6539        | 213.4384        | 6  | H      | 9  | 1161.5412       | 581.2742        | 387.8519        |
|         | 805.2989        | 403.1531        | 269.1045        | 7  | S[167] | 8  | 1024.4823       | 512.7448        | 342.1656        |
|         | 920.3258        | 460.6665        | 307.4468        | 8  | D      | 7  | 857.4839        | 429.2456        | 286.4995        |
|         | 1033.4099       | 517.2086        | 345.1415        | 9  | L      | 6  | 742.4570        | 371.7321        | 248.1572        |
|         | 1132.4783       | 566.7428        | 378.1643        | 10 | V      | 5  | 629.3729        | 315.1901        | 210.4625        |
|         | 1246.5212       | 623.7642        | 416.1786        | 11 | N      | 4  | 530.3045        | 265.6559        | 177.4397        |
|         | 1359.6053       | 680.3063        | 453.8733        | 12 | L      | 3  | 416.2616        | 208.6344        | 139.4254        |
|         | 1487.6638       | 744.3356        | 496.5595        | 13 | Q      | 2  | 303.1775        | 152.0924        | 101.7307        |
|         |                 |                 |                 | 14 | R      | 1  | 175.1190        | 88.0631         | 59.0445         |

# Annotated spectra from Saleem et. al. 2009

R.NKS<sub>167</sub>DGNISALTFKA/2

0.9813

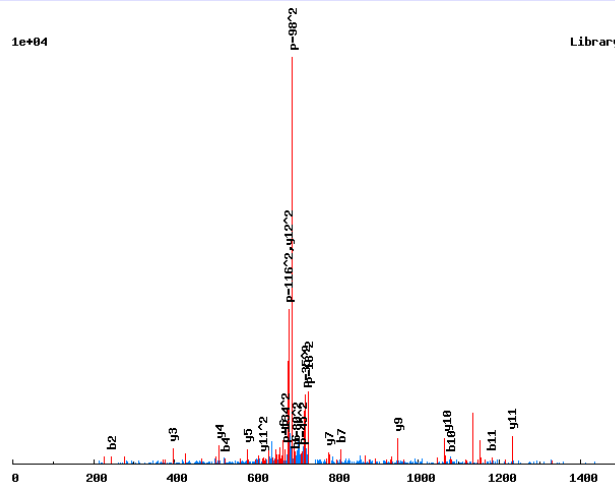

| Library | b <sup>1+</sup>  | b <sup>2+</sup> | #  | AA     | #  | y <sup>1+</sup>  | y <sup>2+</sup> |
|---------|------------------|-----------------|----|--------|----|------------------|-----------------|
|         | 115.0502         | 58.0287         | 1  | N      | 13 |                  |                 |
|         | <b>243.1452</b>  | 122.0762        | 2  | K      | 12 | 1360.6508        | <b>680.8290</b> |
|         | 410.1435         | 205.5754        | 3  | S[167] | 11 | <b>1232.5558</b> | <b>616.7816</b> |
|         | <b>525.1705</b>  | 263.0889        | 4  | D      | 10 | <b>1065.5575</b> | 533.2824        |
|         | 582.1919         | 291.5996        | 5  | G      | 9  | <b>950.5305</b>  | 475.7689        |
|         | <b>696.2349</b>  | 348.6211        | 6  | N      | 8  | 893.5091         | 447.2582        |
|         | <b>809.3189</b>  | 405.1631        | 7  | I      | 7  | <b>779.4662</b>  | 390.2367        |
|         | 896.3510         | 448.6791        | 8  | S      | 6  | <b>666.3821</b>  | 333.6947        |
|         | 967.3881         | 484.1977        | 9  | A      | 5  | <b>579.3501</b>  | 290.1787        |
|         | <b>1080.4721</b> | 540.7397        | 10 | L      | 4  | <b>508.3130</b>  | 254.6601        |
|         | <b>1181.5198</b> | 591.2635        | 11 | T      | 3  | <b>395.2289</b>  | 198.1181        |
|         | 1328.5882        | 664.7977        | 12 | F      | 2  | 294.1812         | 147.5942        |
|         |                  |                 | 13 | K      | 1  | 147.1128         | 74.0600         |



# Annotated spectra from Saleem et. al. 2009

R.NKS<sub>167</sub>INSESFSS<sub>167</sub>PSLR.A/2

0.9278

1e+04

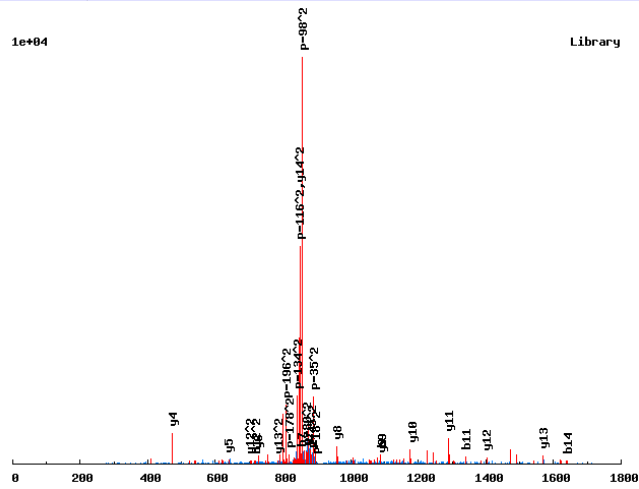

| Library | b <sup>1+</sup> | b <sup>2+</sup> | #  | AA     | #  | y <sup>1+</sup> | y <sup>2+</sup> |
|---------|-----------------|-----------------|----|--------|----|-----------------|-----------------|
|         | 115.0502        | 58.0287         | 1  | N      | 15 |                 |                 |
|         | 243.1452        | 122.0762        | 2  | K      | 14 | 1698.7136       | 849.8604        |
|         | 410.1435        | 205.5754        | 3  | S[167] | 13 | 1570.6186       | 785.8129        |
|         | 523.2276        | 262.1174        | 4  | I      | 12 | 1403.6202       | 702.3138        |
|         | 637.2705        | 319.1389        | 5  | N      | 11 | 1290.5362       | 645.7717        |
|         | 724.3026        | 362.6549        | 6  | S      | 10 | 1176.4933       | 588.7503        |
|         | 853.3451        | 427.1762        | 7  | E      | 9  | 1089.4612       | 545.2343        |
|         | 940.3772        | 470.6922        | 8  | S      | 8  | 960.4186        | 480.7130        |
|         | 1087.4456       | 544.2264        | 9  | F      | 7  | 873.3866        | 437.1969        |
|         | 1174.4776       | 587.7424        | 10 | S      | 6  | 726.3182        | 363.6627        |
|         | 1341.4760       | 671.2416        | 11 | S[167] | 5  | 639.2862        | 320.1467        |
|         | 1438.5287       | 719.7680        | 12 | P      | 4  | 472.2878        | 236.6475        |
|         | 1525.5608       | 763.2840        | 13 | S      | 3  | 375.2350        | 188.1212        |
|         | 1638.6448       | 819.8261        | 14 | L      | 2  | 288.2030        | 144.6051        |
|         |                 |                 | 15 | R      | 1  | 175.1190        | 88.0631         |

# Annotated spectra from Saleem et. al. 2009

R.NKSSS<sub>167</sub>HIGS<sub>167</sub>VSNSSSSDR.N/3

0.9122

1e+04

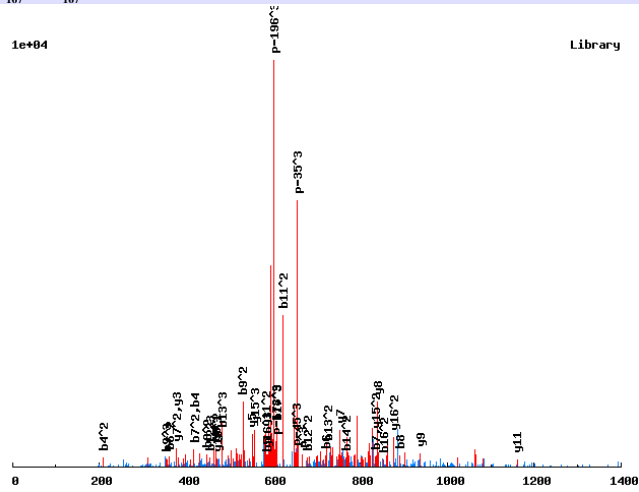

| Library | b <sup>1+</sup> | b <sup>2+</sup> | b <sup>3+</sup> | #  | AA     | #  | y <sup>1+</sup> | y <sup>2+</sup> | y <sup>3+</sup> |
|---------|-----------------|-----------------|-----------------|----|--------|----|-----------------|-----------------|-----------------|
|         | 115.0502        | 58.0287         | 39.0216         | 1  | N      | 18 |                 |                 |                 |
|         | 243.1452        | 122.0762        | 81.7199         | 2  | K      | 17 | 1881.7376       | 941.3724        | 627.9174        |
|         | 330.1772        | 165.5922        | 110.7306        | 3  | S      | 16 | 1753.6426       | 877.3249        | 585.2191        |
|         | 417.2092        | 209.1083        | 139.7413        | 4  | S      | 15 | 1666.6106       | 833.8089        | 556.2084        |
|         | 584.2076        | 292.6074        | 195.4074        | 5  | S[167] | 14 | 1579.5785       | 790.2929        | 527.1977        |
|         | 721.2665        | 361.1369        | 241.0937        | 6  | H      | 13 | 1412.5802       | 706.7937        | 471.5316        |
|         | 834.3506        | 417.6789        | 278.7884        | 7  | I      | 12 | 1275.5213       | 638.2643        | 425.8453        |
|         | 891.3720        | 446.1897        | 297.7955        | 8  | G      | 11 | 1162.4372       | 581.7222        | 388.1506        |
|         | 1058.3704       | 529.6888        | 353.4616        | 9  | S[167] | 10 | 1105.4157       | 553.2115        | 369.1434        |
|         | 1157.4388       | 579.2230        | 386.4845        | 10 | V      | 9  | 938.4174        | 469.7123        | 313.4773        |
|         | 1244.4708       | 622.7391        | 415.4951        | 11 | S      | 8  | 839.3490        | 420.1781        | 280.4545        |
|         | 1358.5138       | 679.7605        | 453.5094        | 12 | N      | 7  | 752.3169        | 376.6621        | 251.4438        |
|         | 1445.5458       | 723.2765        | 482.5201        | 13 | S      | 6  | 638.2740        | 319.6406        | 213.4295        |
|         | 1532.5778       | 766.7925        | 511.5308        | 14 | S      | 5  | 551.2420        | 276.1246        | 184.4188        |
|         | 1619.6098       | 810.3086        | 540.5415        | 15 | S      | 4  | 464.2099        | 232.6086        | 155.4082        |
|         | 1706.6419       | 853.8246        | 569.5521        | 16 | S      | 3  | 377.1779        | 189.0926        | 126.3975        |
|         | 1821.6688       | 911.3380        | 607.8945        | 17 | D      | 2  | 290.1459        | 145.5766        | 97.3868         |
|         |                 |                 |                 | 18 | R      | 1  | 175.1190        | 88.0631         | 59.0445         |

# Annotated spectra from Saleem et. al. 2009

R.NLATQTQNSSKQDS<sub>167</sub>S<sub>167</sub>ADEEDNKNVPK.K/3

0.8781

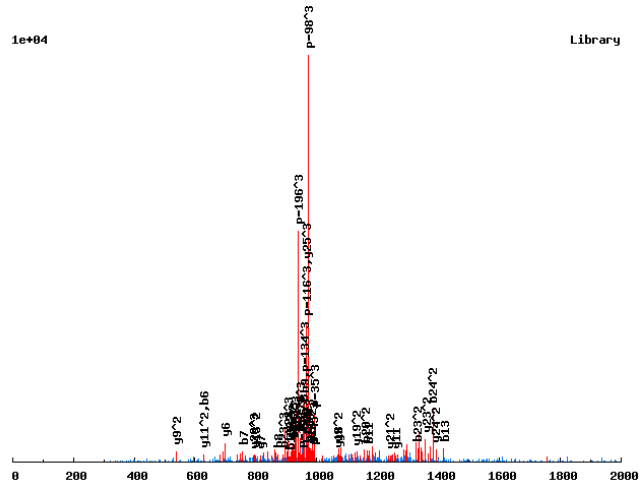

| Library | b <sup>1+</sup> | b <sup>2+</sup> | b <sup>3+</sup> | #  | AA     | #  | y <sup>1+</sup> | y <sup>2+</sup> | y <sup>3+</sup> |
|---------|-----------------|-----------------|-----------------|----|--------|----|-----------------|-----------------|-----------------|
|         | 115.0502        | 58.0287         | 39.0216         | 1  | N      | 26 |                 |                 |                 |
|         | 228.1343        | 114.5708        | 76.7163         | 2  | L      | 25 | 2894.2088       | 1447.6081       | 965.4078        |
|         | 299.1714        | 150.0893        | 100.3953        | 3  | A      | 24 | 2781.1248       | 1391.0660       | 927.7131        |
|         | 400.2191        | 200.6132        | 134.0779        | 4  | T      | 23 | 2710.0877       | 1355.5475       | 904.0341        |
|         | 528.2776        | 264.6425        | 176.7641        | 5  | Q      | 22 | 2609.0400       | 1305.0236       | 870.3515        |
|         | 629.3253        | 315.1663        | 210.4466        | 6  | T      | 21 | 2480.9814       | 1240.9943       | 827.6653        |
|         | 757.3839        | 379.1956        | 253.1328        | 7  | Q      | 20 | 2379.9337       | 1190.4705       | 793.9828        |
|         | 871.4268        | 436.2171        | 291.1471        | 8  | N      | 19 | 2251.8752       | 1126.4412       | 751.2966        |
|         | 958.4589        | 479.7331        | 320.1578        | 9  | S      | 18 | 2137.8322       | 1069.4198       | 713.2823        |
|         | 1045.4909       | 523.2491        | 349.1685        | 10 | S      | 17 | 2050.8002       | 1025.9037       | 684.2716        |
|         | 1173.5858       | 587.2966        | 391.8668        | 11 | K      | 16 | 1963.7682       | 982.3877        | 655.2609        |
|         | 1301.6444       | 651.3259        | 434.5530        | 12 | Q      | 15 | 1835.6732       | 918.3402        | 612.5626        |
|         | 1416.6714       | 708.8393        | 472.8953        | 13 | D      | 14 | 1707.6146       | 854.3110        | 569.8764        |
|         | 1583.6697       | 792.3385        | 528.5614        | 14 | S[167] | 13 | 1592.5877       | 796.7975        | 531.5341        |
|         | 1750.6681       | 875.8377        | 584.2276        | 15 | S[167] | 12 | 1425.5893       | 713.2983        | 475.8680        |
|         | 1821.7052       | 911.3562        | 607.9066        | 16 | A      | 11 | 1258.5910       | 629.7991        | 420.2018        |
|         | 1936.7321       | 968.8697        | 646.2489        | 17 | D      | 10 | 1187.5538       | 594.2806        | 396.5228        |
|         | 2065.7747       | 1033.3910       | 689.2631        | 18 | E      | 9  | 1072.5269       | 536.7671        | 358.1805        |
|         | 2194.8173       | 1097.9123       | 732.2773        | 19 | E      | 8  | 943.4843        | 472.2458        | 315.1663        |
|         | 2309.8443       | 1155.4258       | 770.6196        | 20 | D      | 7  | 814.4417        | 407.7245        | 272.1521        |
|         | 2423.8872       | 1212.4472       | 808.6339        | 21 | N      | 6  | 699.4148        | 350.2110        | 233.8098        |
|         | 2551.9822       | 1276.4947       | 851.3322        | 22 | K      | 5  | 585.3719        | 293.1896        | 195.7955        |
|         | 2666.0251       | 1333.5162       | 889.3465        | 23 | N      | 4  | 457.2769        | 229.1421        | 153.0972        |
|         | 2765.0935       | 1383.0504       | 922.3694        | 24 | V      | 3  | 343.2340        | 172.1206        | 115.0828        |
|         | 2862.1463       | 1431.5768       | 954.7203        | 25 | P      | 2  | 244.1656        | 122.5864        | 82.0600         |
|         |                 |                 |                 | 26 | K      | 1  | 147.1128        | 74.0600         | 49.7091         |

# Annotated spectra from Saleem et. al. 2009

K.NLINKS<sub>167</sub>FEELR.R/2

0.5898

1e+04

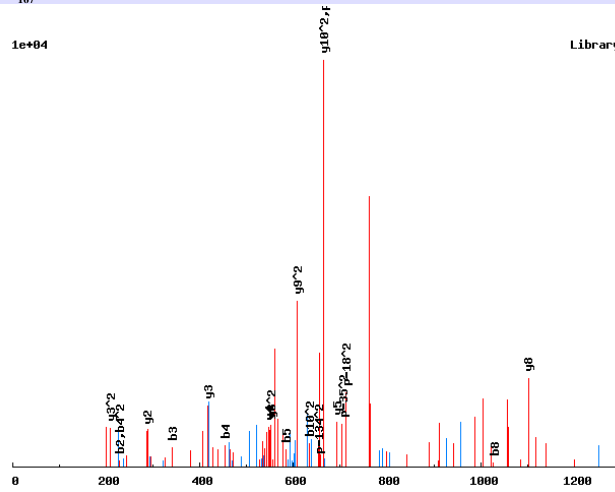

| Library | b <sup>1+</sup> | b <sup>2+</sup> | #  | AA     | #  | y <sup>1+</sup> | y <sup>2+</sup> |
|---------|-----------------|-----------------|----|--------|----|-----------------|-----------------|
|         | 115.0502        | 58.0287         | 1  | N      | 11 |                 |                 |
|         | 228.1343        | 114.5708        | 2  | L      | 10 | 1328.6610       | 664.8341        |
|         | 341.2183        | 171.1128        | 3  | I      | 9  | 1215.5769       | 608.2921        |
|         | 455.2613        | 228.1343        | 4  | N      | 8  | 1102.4929       | 551.7501        |
|         | 583.3562        | 292.1818        | 5  | K      | 7  | 988.4499        | 494.7286        |
|         | 750.3546        | 375.6809        | 6  | S[167] | 6  | 860.3550        | 430.6811        |
|         | 897.4230        | 449.2151        | 7  | F      | 5  | 693.3566        | 347.1819        |
|         | 1026.4656       | 513.7364        | 8  | E      | 4  | 546.2882        | 273.6477        |
|         | 1155.5082       | 578.2577        | 9  | E      | 3  | 417.2456        | 209.1264        |
|         | 1268.5922       | 634.7998        | 10 | L      | 2  | 288.2030        | 144.6051        |
|         |                 |                 | 11 | R      | 1  | 175.1190        | 88.0631         |

# Annotated spectra from Saleem et. al. 2009

K.NLLESS<sub>167</sub>ATAS<sub>167</sub>PSPTR<sub>166</sub>S/2

0.969

1e+04

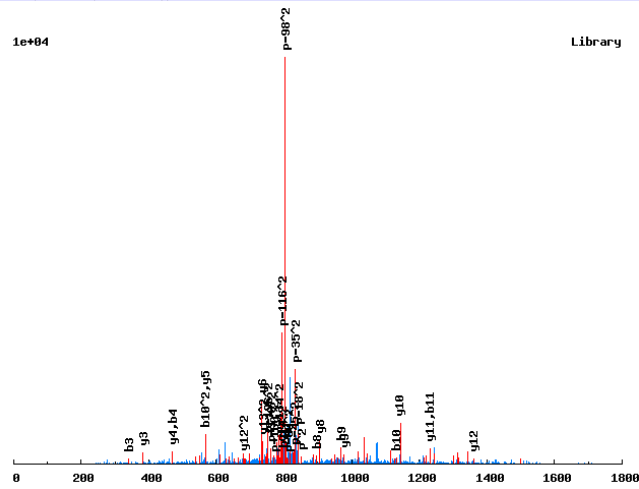

| Library | b <sup>1+</sup> | b <sup>2+</sup> | #  | AA     | #  | y <sup>1+</sup> | y <sup>2+</sup> |
|---------|-----------------|-----------------|----|--------|----|-----------------|-----------------|
|         | 115.0502        | 58.0287         | 1  | N      | 15 |                 |                 |
|         | 228.1343        | 114.5708        | 2  | L      | 14 | 1586.6738       | 793.8405        |
|         | 341.2183        | 171.1128        | 3  | L      | 13 | 1473.5898       | 737.2985        |
|         | 470.2609        | 235.6341        | 4  | E      | 12 | 1360.5057       | 680.7565        |
|         | 557.2930        | 279.1501        | 5  | S      | 11 | 1231.4631       | 616.2352        |
|         | 724.2913        | 362.6493        | 6  | S[167] | 10 | 1144.4311       | 572.7192        |
|         | 795.3284        | 398.1679        | 7  | A      | 9  | 977.4327        | 489.2200        |
|         | 896.3761        | 448.6917        | 8  | T      | 8  | 906.3956        | 453.7014        |
|         | 967.4132        | 484.2102        | 9  | A      | 7  | 805.3479        | 403.1776        |
|         | 1134.4116       | 567.7094        | 10 | S[167] | 6  | 734.3108        | 367.6590        |
|         | 1231.4643       | 616.2358        | 11 | P      | 5  | 567.3124        | 284.1599        |
|         | 1318.4964       | 659.7518        | 12 | S      | 4  | 470.2597        | 235.6335        |
|         | 1415.5491       | 708.2782        | 13 | P      | 3  | 383.2277        | 192.1175        |
|         | 1516.5968       | 758.8020        | 14 | T      | 2  | 286.1749        | 143.5911        |
|         |                 |                 | 15 | R[166] | 1  | 185.1272        | 93.0672         |

# Annotated spectra from Saleem et. al. 2009

K.NLLS<sub>167</sub>SSDSRRNS<sub>167</sub>QDEDSLPNNTNLIK.E/3

0.8166

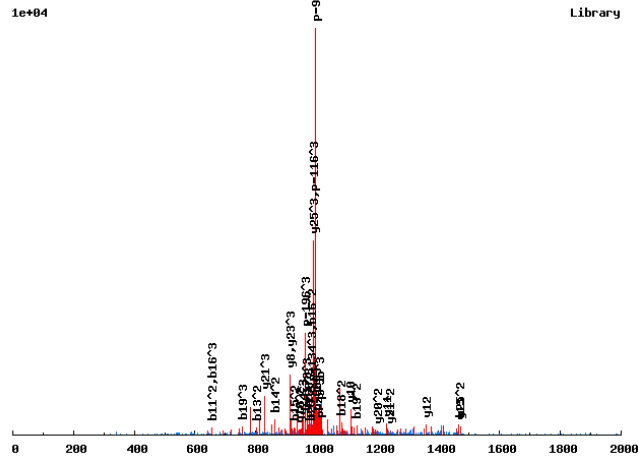

| Library | b <sup>1+</sup> | b <sup>2+</sup> | b <sup>3+</sup> | #  | AA      | #  | y <sup>1+</sup> | y <sup>2+</sup> | y <sup>3+</sup> |
|---------|-----------------|-----------------|-----------------|----|---------|----|-----------------|-----------------|-----------------|
|         | 115.0502        | 58.0287         | 39.0216         | 1  | N       | 26 |                 |                 |                 |
|         | 228.1343        | 114.5708        | 76.7163         | 2  | L       | 25 | 2963.3143       | 1482.1608       | 988.4430        |
|         | 341.2183        | 171.1128        | 114.4110        | 3  | L       | 24 | 2850.2303       | 1425.6188       | 950.7483        |
|         | 508.2167        | 254.6120        | 170.0771        | 4  | S [167] | 23 | 2737.1462       | 1369.0767       | 913.0536        |
|         | 595.2487        | 298.1280        | 199.0878        | 5  | S       | 22 | 2570.1478       | 1285.5776       | 857.3875        |
|         | 682.2808        | 341.6440        | 228.0984        | 6  | S       | 21 | 2483.1158       | 1242.0615       | 828.3768        |
|         | 797.3077        | 399.1575        | 266.4408        | 7  | D       | 20 | 2396.0838       | 1198.5455       | 799.3661        |
|         | 884.3397        | 442.6735        | 295.4514        | 8  | S       | 19 | 2281.0568       | 1141.0321       | 761.0238        |
|         | 1040.4408       | 520.7241        | 347.4851        | 9  | R       | 18 | 2194.0248       | 1097.5160       | 732.0131        |
|         | 1196.5419       | 598.7746        | 399.5188        | 10 | R       | 17 | 2037.9237       | 1019.4655       | 679.9794        |
|         | 1310.5849       | 655.7961        | 437.5331        | 11 | N       | 16 | 1881.8226       | 941.4149        | 627.9457        |
|         | 1477.5832       | 739.2953        | 493.1993        | 12 | S [167] | 15 | 1767.7797       | 884.3935        | 589.9314        |
|         | 1605.6418       | 803.3245        | 535.8855        | 13 | Q       | 14 | 1600.7813       | 800.8943        | 534.2653        |
|         | 1720.6688       | 860.8380        | 574.2278        | 14 | D       | 13 | 1472.7227       | 736.8650        | 491.5791        |
|         | 1849.7113       | 925.3593        | 617.2420        | 15 | E       | 12 | 1357.6958       | 679.3515        | 453.2368        |
|         | 1964.7383       | 982.8728        | 655.5843        | 16 | D       | 11 | 1228.6532       | 614.8302        | 410.2226        |
|         | 2051.7703       | 1026.3888       | 684.5950        | 17 | S       | 10 | 1113.6262       | 557.3168        | 371.8803        |
|         | 2164.8544       | 1082.9308       | 722.2896        | 18 | L       | 9  | 1026.5942       | 513.8007        | 342.8696        |
|         | 2261.9071       | 1131.4572       | 754.6406        | 19 | P       | 8  | 913.5102        | 457.2587        | 305.1749        |
|         | 2375.9501       | 1188.4787       | 792.6549        | 20 | N       | 7  | 816.4574        | 408.7323        | 272.8240        |
|         | 2489.9930       | 1245.5001       | 830.6692        | 21 | N       | 6  | 702.4145        | 351.7109        | 234.8097        |
|         | 2591.0407       | 1296.0240       | 864.3517        | 22 | T       | 5  | 588.3715        | 294.6894        | 196.7954        |
|         | 2705.0836       | 1353.0454       | 902.3661        | 23 | N       | 4  | 487.3238        | 244.1656        | 163.1128        |
|         | 2818.1677       | 1409.5875       | 940.0607        | 24 | L       | 3  | 373.2809        | 187.1441        | 125.0985        |
|         | 2931.2517       | 1466.1295       | 977.7554        | 25 | I       | 2  | 260.1969        | 130.6021        | 87.4038         |
|         |                 |                 |                 | 26 | K       | 1  | 147.1128        | 74.0600         | 49.7091         |

# Annotated spectra from Saleem et. al. 2009

R.NLMSLPT<sub>181</sub>NTPR<sub>166</sub>N/2

0.9967

1e+04

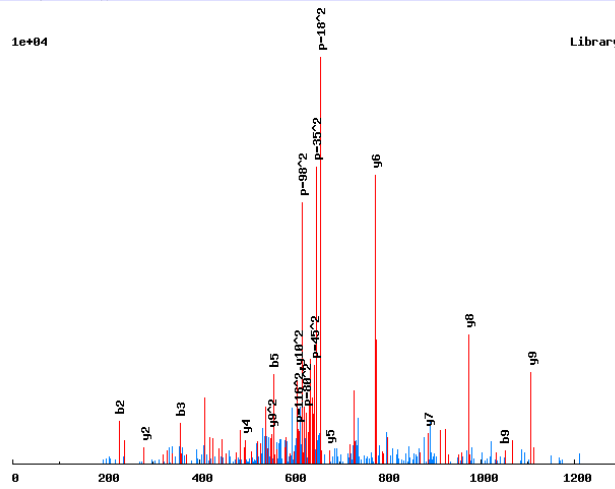

| Library | b <sup>1+</sup>  | b <sup>2+</sup> | #  | AA     | #  | y <sup>1+</sup>  | y <sup>2+</sup> |
|---------|------------------|-----------------|----|--------|----|------------------|-----------------|
|         | 115.0502         | 58.0287         | 1  | N      | 11 |                  |                 |
|         | <b>228.1343</b>  | 114.5708        | 2  | L      | 10 | 1219.5780        | <b>610.2926</b> |
|         | <b>359.1748</b>  | 180.0910        | 3  | M      | 9  | <b>1106.4939</b> | <b>553.7506</b> |
|         | 446.2068         | 223.6070        | 4  | S      | 8  | <b>975.4535</b>  | 488.2304        |
|         | <b>559.2908</b>  | 280.1491        | 5  | L      | 7  | <b>888.4214</b>  | 444.7144        |
|         | 656.3436         | 328.6754        | 6  | P      | 6  | <b>775.3374</b>  | 388.1723        |
|         | 837.3576         | 419.1825        | 7  | T[181] | 5  | <b>678.2846</b>  | 339.6459        |
|         | 951.4006         | 476.2039        | 8  | N      | 4  | <b>497.2706</b>  | 249.1389        |
|         | <b>1052.4482</b> | 526.7278        | 9  | T      | 3  | 383.2277         | 192.1175        |
|         | 1149.5010        | 575.2541        | 10 | P      | 2  | <b>282.1800</b>  | 141.5936        |
|         |                  |                 | 11 | R[166] | 1  | 185.1272         | 93.0672         |

# Annotated spectra from Saleem et. al. 2009

R.NLM<sub>147</sub>S<sub>167</sub>LPINT<sub>181</sub>PR.N/2

0.9908

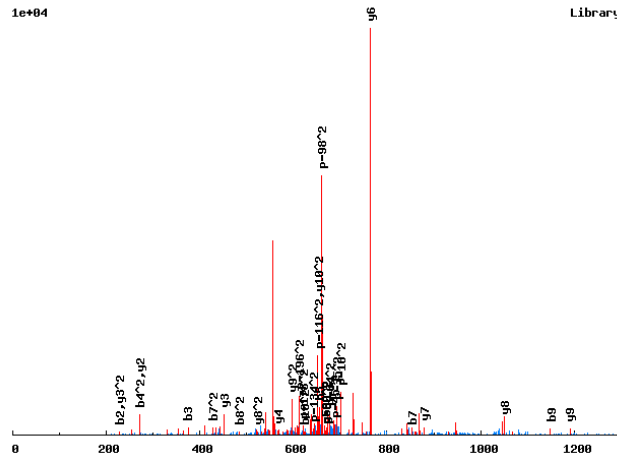

| Library | b <sup>1+</sup> | b <sup>2+</sup> | #  | AA     | #  | y <sup>1+</sup> | y <sup>2+</sup> |
|---------|-----------------|-----------------|----|--------|----|-----------------|-----------------|
|         | 115.0502        | 58.0287         | 1  | N      | 11 |                 |                 |
|         | 228.1343        | 114.5708        | 2  | L      | 10 | 1305.5310       | 653.2691        |
|         | 375.1697        | 188.0885        | 3  | M[147] | 9  | 1192.4469       | 596.7271        |
|         | 542.1680        | 271.5877        | 4  | S[167] | 8  | 1045.4115       | 523.2094        |
|         | 655.2521        | 328.1297        | 5  | L      | 7  | 878.4132        | 439.7102        |
|         | 752.3049        | 376.6561        | 6  | P      | 6  | 765.3291        | 383.1682        |
|         | 853.3525        | 427.1799        | 7  | T      | 5  | 668.2763        | 334.6418        |
|         | 967.3955        | 484.2014        | 8  | N      | 4  | 567.2287        | 284.1180        |
|         | 1148.4095       | 574.7084        | 9  | T[181] | 3  | 453.1857        | 227.0965        |
|         | 1245.4622       | 623.2348        | 10 | P      | 2  | 272.1717        | 136.5895        |
|         |                 |                 | 11 | R      | 1  | 175.1190        | 88.0631         |



# Annotated spectra from Saleem et. al. 2009

K-NLS<sub>167</sub>NENC<sub>160</sub>SFKK.Q/2

0.7546

1e+04

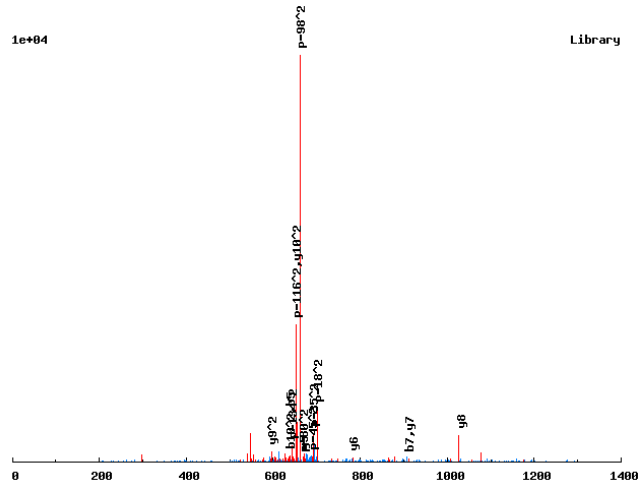

| Library | b <sup>1+</sup> | b <sup>2+</sup> | #  | AA     | #  | y <sup>1+</sup> | y <sup>2+</sup> |
|---------|-----------------|-----------------|----|--------|----|-----------------|-----------------|
|         | 115.0502        | 58.0287         | 1  | N      | 11 |                 |                 |
|         | 228.1343        | 114.5708        | 2  | L      | 10 | 1306.5497       | 653.7785        |
|         | 395.1326        | 198.0700        | 3  | S[167] | 9  | 1193.4657       | 597.2365        |
|         | 509.1756        | 255.0914        | 4  | N      | 8  | 1026.4673       | 513.7373        |
|         | 638.2182        | 319.6127        | 5  | E      | 7  | 912.4244        | 456.7158        |
|         | 752.2611        | 376.6342        | 6  | N      | 6  | 783.3818        | 392.1945        |
|         | 912.2917        | 456.6495        | 7  | C[160] | 5  | 669.3389        | 335.1731        |
|         | 999.3238        | 500.1655        | 8  | S      | 4  | 509.3082        | 255.1577        |
|         | 1146.3922       | 573.6997        | 9  | F      | 3  | 422.2762        | 211.6417        |
|         | 1274.4871       | 637.7472        | 10 | K      | 2  | 275.2078        | 138.1075        |
|         |                 |                 | 11 | K      | 1  | 147.1128        | 74.0600         |

Annotated spectra from Saleem et. al. 2009

R.NLS<sub>167</sub>NGS<sub>167</sub>LNDINENEELQNFHR.K/3

0.958

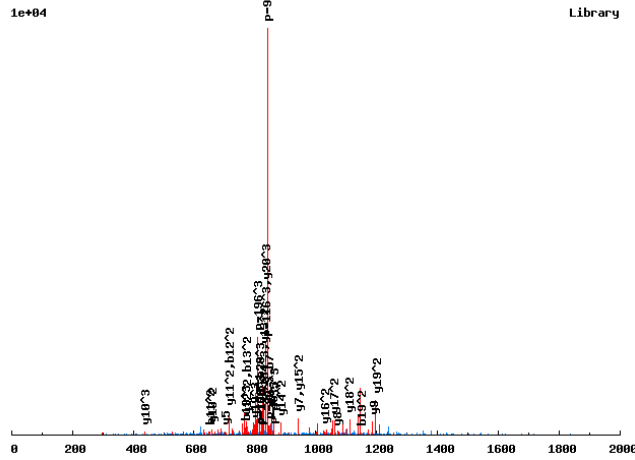

| Library | b <sup>1+</sup> | b <sup>2+</sup> | b <sup>3+</sup> | #  | AA      | #  | y <sup>1+</sup> | y <sup>2+</sup> | y <sup>3+</sup> |
|---------|-----------------|-----------------|-----------------|----|---------|----|-----------------|-----------------|-----------------|
|         | 115.0502        | 58.0287         | 39.0216         | 1  | N       | 21 |                 |                 |                 |
|         | 228.1343        | 114.5708        | 76.7163         | 2  | L       | 20 | 2503.0286       | 1252.0180       | 835.0144        |
|         | 395.1326        | 198.0700        | 132.3824        | 3  | S [167] | 19 | 2389.9446       | 1195.4759       | 797.3197        |
|         | 509.1756        | 255.0914        | 170.3967        | 4  | N       | 18 | 2222.9462       | 1111.9767       | 741.6536        |
|         | 566.1970        | 283.6022        | 189.4039        | 5  | G       | 17 | 2108.9033       | 1054.9553       | 703.6393        |
|         | 733.1954        | 367.1013        | 245.0700        | 6  | S [167] | 16 | 2051.8818       | 1026.4446       | 684.6321        |
|         | 846.2794        | 423.6434        | 282.7647        | 7  | L       | 15 | 1884.8835       | 942.9454        | 628.9660        |
|         | 960.3224        | 480.6648        | 320.7790        | 8  | N       | 14 | 1771.7994       | 886.4033        | 591.2713        |
|         | 1075.3493       | 538.1783        | 359.1213        | 9  | D       | 13 | 1657.7565       | 829.3819        | 553.2570        |
|         | 1188.4334       | 594.7203        | 396.8160        | 10 | I       | 12 | 1542.7295       | 771.8684        | 514.9147        |
|         | 1302.4763       | 651.7418        | 434.8303        | 11 | N       | 11 | 1429.6455       | 715.3264        | 477.2200        |
|         | 1431.5189       | 716.2631        | 477.8445        | 12 | E       | 10 | 1315.6025       | 658.3049        | 439.2057        |
|         | 1545.5618       | 773.2846        | 515.8588        | 13 | N       | 9  | 1186.5599       | 593.7836        | 396.1915        |
|         | 1674.6044       | 837.8058        | 558.8730        | 14 | E       | 8  | 1072.5170       | 536.7621        | 358.1772        |
|         | 1803.6470       | 902.3271        | 601.8872        | 15 | E       | 7  | 943.4744        | 472.2409        | 315.1630        |
|         | 1916.7311       | 958.8692        | 639.5819        | 16 | L       | 6  | 814.4318        | 407.7196        | 272.1488        |
|         | 2044.7896       | 1022.8985       | 682.2681        | 17 | Q       | 5  | 701.3478        | 351.1775        | 234.4541        |
|         | 2158.8326       | 1079.9199       | 720.2824        | 18 | N       | 4  | 573.2892        | 287.1482        | 191.7679        |
|         | 2305.9010       | 1153.4541       | 769.3052        | 19 | F       | 3  | 459.2463        | 230.1268        | 153.7536        |
|         | 2442.9599       | 1221.9836       | 814.9915        | 20 | H       | 2  | 312.1779        | 156.5926        | 104.7308        |
|         |                 |                 |                 | 21 | R       | 1  | 175.1190        | 88.0631         | 59.0445         |

Annotated spectra from Saleem et. al. 2009

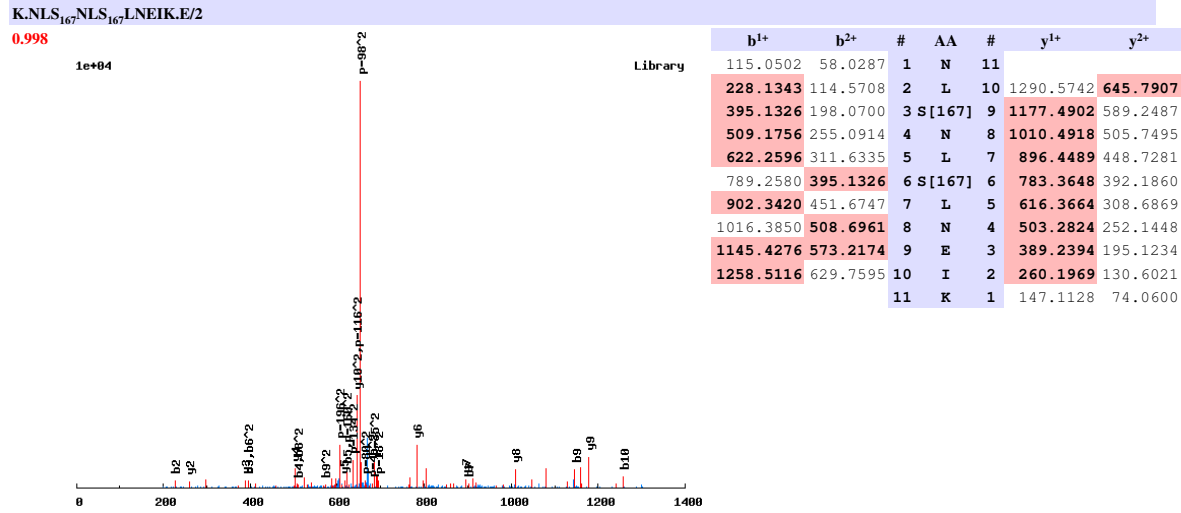

# Annotated spectra from Saleem et. al. 2009

R.NNDEEDDEDPVS<sub>167</sub>PK<sub>136</sub>PVS<sub>167</sub>K<sub>136</sub>S/2

0.9999

1e+04

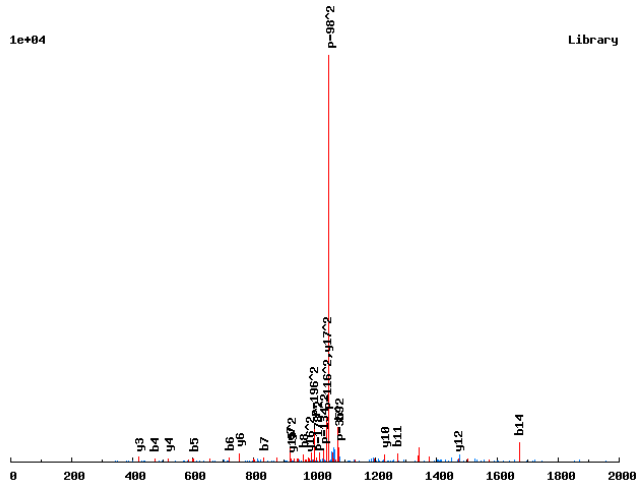

| Library | b <sup>1+</sup> | b <sup>2+</sup> | #  | AA      | #  | y <sup>1+</sup> | y <sup>2+</sup> |
|---------|-----------------|-----------------|----|---------|----|-----------------|-----------------|
|         | 115.0502        | 58.0287         | 1  | N       | 18 |                 |                 |
|         | 229.0931        | 115.0502        | 2  | N       | 17 | 2075.8064       | 1038.4069       |
|         | 344.1201        | 172.5637        | 3  | D       | 16 | 1961.7635       | 981.3854        |
|         | 473.1627        | 237.0850        | 4  | E       | 15 | 1846.7366       | 923.8719        |
|         | 602.2053        | 301.6063        | 5  | E       | 14 | 1717.6940       | 859.3506        |
|         | 717.2322        | 359.1197        | 6  | D       | 13 | 1588.6514       | 794.8293        |
|         | 832.2591        | 416.6332        | 7  | D       | 12 | 1473.6245       | 737.3159        |
|         | 961.3017        | 481.1545        | 8  | E       | 11 | 1358.5975       | 679.8024        |
|         | 1076.3287       | 538.6680        | 9  | D       | 10 | 1229.5549       | 615.2811        |
|         | 1173.3814       | 587.1944        | 10 | P       | 9  | 1114.5280       | 557.7676        |
|         | 1272.4498       | 636.7286        | 11 | V       | 8  | 1017.4752       | 509.2413        |
|         | 1439.4482       | 720.2277        | 12 | S [167] | 7  | 918.4068        | 459.7070        |
|         | 1536.5010       | 768.7541        | 13 | P       | 6  | 751.4084        | 376.2079        |
|         | 1672.6101       | 836.8087        | 14 | K [136] | 5  | 654.3557        | 327.6815        |
|         | 1769.6629       | 885.3351        | 15 | P       | 4  | 518.2465        | 259.6269        |
|         | 1868.7313       | 934.8693        | 16 | V       | 3  | 421.1938        | 211.1005        |
|         | 2035.7297       | 1018.3685       | 17 | S [167] | 2  | 322.1254        | 161.5663        |
|         |                 |                 | 18 | K [136] | 1  | 155.1270        | 78.0671         |

# Annotated spectra from Saleem et. al. 2009

K.NNLSFNKKS<sub>167</sub>-NYS<sub>167</sub>-LTK.L/2

0.6832

1e+04

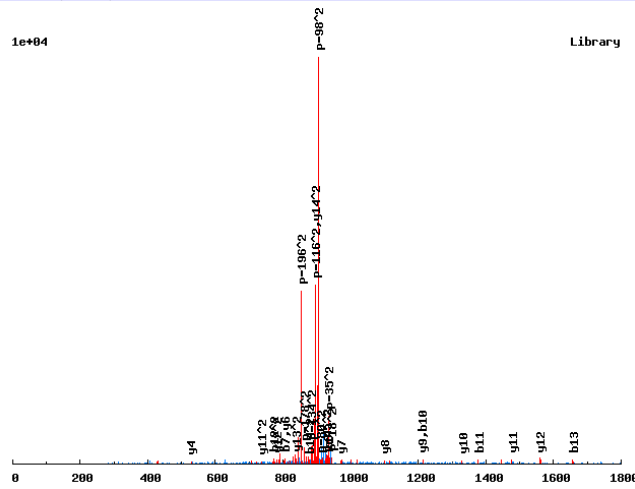

| Library | b <sup>1+</sup> | b <sup>2+</sup> | #  | AA     | #  | y <sup>1+</sup> | y <sup>2+</sup> |
|---------|-----------------|-----------------|----|--------|----|-----------------|-----------------|
|         | 115.0502        | 58.0287         | 1  | N      | 15 |                 |                 |
|         | 229.0931        | 115.0502        | 2  | N      | 14 | 1789.7558       | 895.3815        |
|         | 342.1772        | 171.5922        | 3  | L      | 13 | 1675.7128       | 838.3601        |
|         | 429.2092        | 215.1083        | 4  | S      | 12 | 1562.6288       | 781.8180        |
|         | 576.2776        | 288.6425        | 5  | F      | 11 | 1475.5968       | 738.3020        |
|         | 690.3206        | 345.6639        | 6  | N      | 10 | 1328.5283       | 664.7678        |
|         | 804.3635        | 402.6854        | 7  | N      | 9  | 1214.4854       | 607.7463        |
|         | 932.4585        | 466.7329        | 8  | K      | 8  | 1100.4425       | 550.7249        |
|         | 1099.4568       | 550.2321        | 9  | S[167] | 7  | 972.3475        | 486.6774        |
|         | 1213.4998       | 607.2535        | 10 | N      | 6  | 805.3492        | 403.1782        |
|         | 1376.5631       | 688.7852        | 11 | Y      | 5  | 691.3062        | 346.1568        |
|         | 1543.5614       | 772.2844        | 12 | S[167] | 4  | 528.2429        | 264.6251        |
|         | 1656.6455       | 828.8264        | 13 | L      | 3  | 361.2445        | 181.1259        |
|         | 1757.6932       | 879.3502        | 14 | T      | 2  | 248.1605        | 124.5839        |
|         |                 |                 | 15 | K      | 1  | 147.1128        | 74.0600         |

# Annotated spectra from Saleem et. al. 2009

K.NNS<sub>167</sub>-GKS<sub>167</sub>-LADLPGK.M2

0.9998

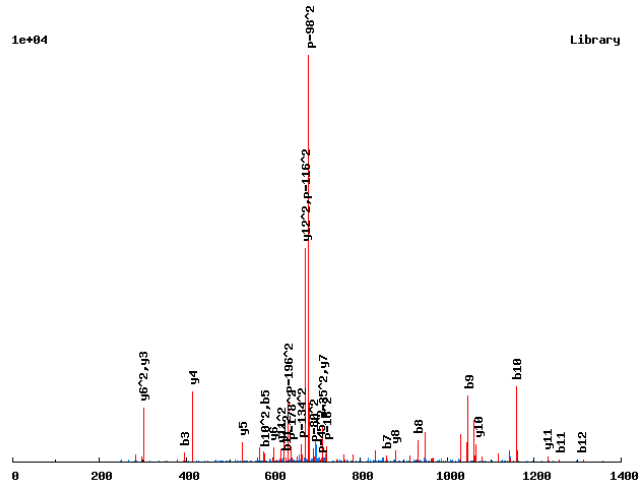

| Library | b <sup>1+</sup> | b <sup>2+</sup> | #  | AA     | #  | y <sup>1+</sup> | y <sup>2+</sup> |
|---------|-----------------|-----------------|----|--------|----|-----------------|-----------------|
|         | 115.0502        | 58.0287         | 1  | N      | 13 |                 |                 |
|         | 229.0931        | 115.0502        | 2  | N      | 12 | 1346.5753       | 673.7913        |
|         | 396.0915        | 198.5494        | 3  | S[167] | 11 | 1232.5323       | 616.7698        |
|         | 453.1130        | 227.0601        | 4  | G      | 10 | 1065.5340       | 533.2706        |
|         | 581.2079        | 291.1076        | 5  | K      | 9  | 1008.5125       | 504.7599        |
|         | 748.2063        | 374.6068        | 6  | S[167] | 8  | 880.4176        | 440.7124        |
|         | 861.2903        | 431.1488        | 7  | L      | 7  | 713.4192        | 357.2132        |
|         | 932.3275        | 466.6674        | 8  | A      | 6  | 600.3351        | 300.6712        |
|         | 1047.3544       | 524.1808        | 9  | D      | 5  | 529.2980        | 265.1527        |
|         | 1160.4385       | 580.7229        | 10 | L      | 4  | 414.2711        | 207.6392        |
|         | 1257.4912       | 629.2492        | 11 | P      | 3  | 301.1870        | 151.0971        |
|         | 1314.5127       | 657.7600        | 12 | G      | 2  | 204.1343        | 102.5708        |
|         |                 |                 | 13 | K      | 1  | 147.1128        | 74.0600         |

# Annotated spectra from Saleem et. al. 2009

K.NNS<sub>167</sub>GK<sub>136</sub>S<sub>167</sub>LSDLPR<sub>166</sub>K/2

0.9902

1e+04

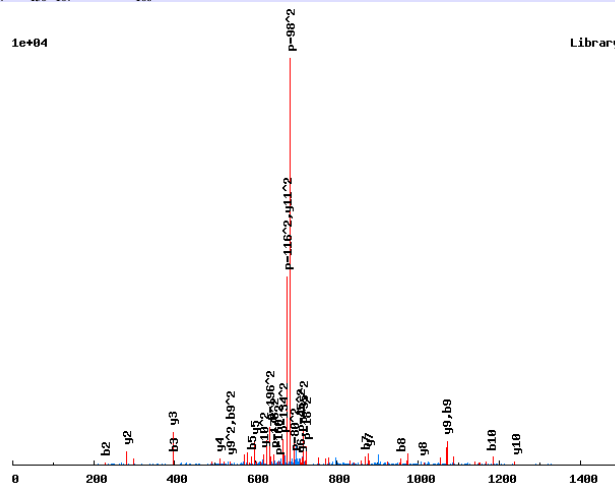

| Library | b <sup>1+</sup> | b <sup>2+</sup> | #  | AA     | #  | y <sup>1+</sup> | y <sup>2+</sup> |
|---------|-----------------|-----------------|----|--------|----|-----------------|-----------------|
|         | 115.0502        | 58.0287         | 1  | N      | 12 |                 |                 |
|         | 229.0931        | 115.0502        | 2  | N      | 11 | 1351.5773       | 676.2923        |
|         | 396.0915        | 198.5494        | 3  | S[167] | 10 | 1237.5344       | 619.2708        |
|         | 453.1130        | 227.0601        | 4  | G      | 9  | 1070.5360       | 535.7717        |
|         | 589.2221        | 295.1147        | 5  | K[136] | 8  | 1013.5146       | 507.2609        |
|         | 756.2205        | 378.6139        | 6  | S[167] | 7  | 877.4054        | 439.2064        |
|         | 869.3045        | 435.1559        | 7  | L      | 6  | 710.4071        | 355.7072        |
|         | 956.3366        | 478.6719        | 8  | S      | 5  | 597.3230        | 299.1651        |
|         | 1071.3635       | 536.1854        | 9  | D      | 4  | 510.2910        | 255.6491        |
|         | 1184.4476       | 592.7274        | 10 | L      | 3  | 395.2640        | 198.1357        |
|         | 1281.5003       | 641.2538        | 11 | P      | 2  | 282.1800        | 141.5936        |
|         |                 |                 | 12 | R[166] | 1  | 185.1272        | 93.0672         |

# Annotated spectra from Saleem et. al. 2009

R.NNS<sub>167</sub>GS<sub>167</sub>SVSLQLAR.N/2

0.9934

1e+04

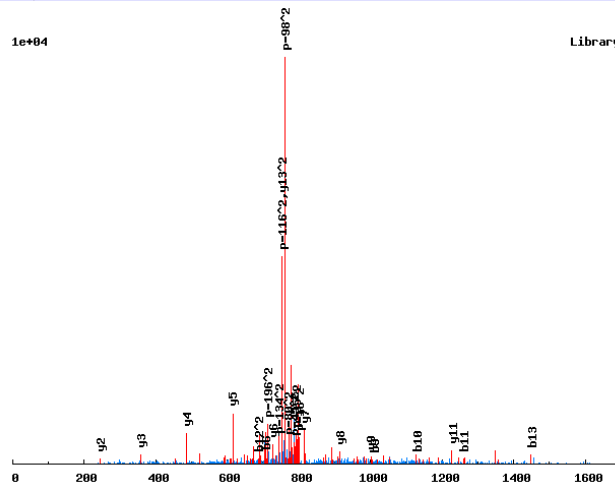

| Library | b <sup>1+</sup> | b <sup>2+</sup> | #  | AA     | #  | y <sup>1+</sup> | y <sup>2+</sup> |
|---------|-----------------|-----------------|----|--------|----|-----------------|-----------------|
|         | 115.0502        | 58.0287         | 1  | N      | 14 |                 |                 |
|         | 229.0931        | 115.0502        | 2  | N      | 13 | 1506.6349       | 753.8211        |
|         | 396.0915        | 198.5494        | 3  | S[167] | 12 | 1392.5920       | 696.7996        |
|         | 453.1130        | 227.0601        | 4  | G      | 11 | 1225.5936       | 613.3005        |
|         | 620.1113        | 310.5593        | 5  | S[167] | 10 | 1168.5722       | 584.7897        |
|         | 707.1434        | 354.0753        | 6  | S      | 9  | 1001.5738       | 501.2905        |
|         | 806.2118        | 403.6095        | 7  | V      | 8  | 914.5418        | 457.7745        |
|         | 893.2438        | 447.1255        | 8  | S      | 7  | 815.4734        | 408.2403        |
|         | 1006.3279       | 503.6676        | 9  | L      | 6  | 728.4413        | 364.7243        |
|         | 1134.3864       | 567.6969        | 10 | Q      | 5  | 615.3573        | 308.1823        |
|         | 1262.4450       | 631.7261        | 11 | Q      | 4  | 487.2987        | 244.1530        |
|         | 1375.5291       | 688.2682        | 12 | L      | 3  | 359.2401        | 180.1237        |
|         | 1446.5662       | 723.7867        | 13 | A      | 2  | 246.1561        | 123.5817        |
|         |                 |                 | 14 | R      | 1  | 175.1190        | 88.0631         |



# Annotated spectra from Saleem et. al. 2009

K.NNS<sub>167</sub>KS<sub>167</sub>STPVNDVPTTAGK.K/3

0.745

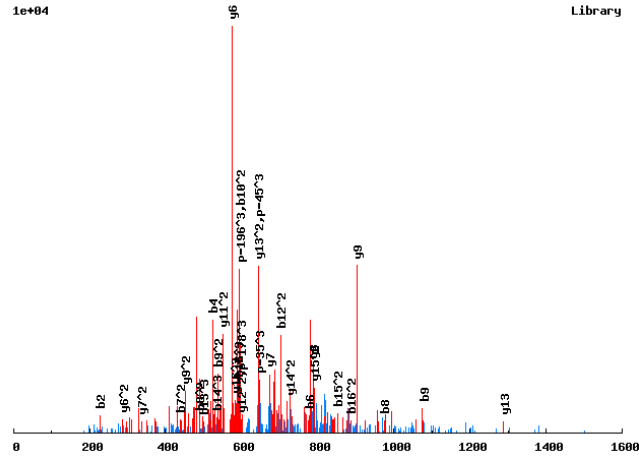

| Library | b <sup>1+</sup>  | b <sup>2+</sup> | b <sup>3+</sup> | #  | AA     | #  | y <sup>1+</sup>  | y <sup>2+</sup> | y <sup>3+</sup> |
|---------|------------------|-----------------|-----------------|----|--------|----|------------------|-----------------|-----------------|
|         | 115.0502         | 58.0287         | 39.0216         | 1  | N      | 18 |                  |                 |                 |
|         | <b>229.0931</b>  | 115.0502        | 77.0359         | 2  | N      | 17 | 1862.7933        | 931.9003        | 621.6026        |
|         | 396.0915         | 198.5494        | 132.7020        | 3  | S[167] | 16 | 1748.7503        | 874.8788        | <b>583.5883</b> |
|         | <b>524.1865</b>  | 262.5969        | 175.4003        | 4  | K      | 15 | 1581.7520        | <b>791.3796</b> | 527.9222        |
|         | 691.1848         | 346.0961        | 231.0665        | 5  | S[167] | 14 | 1453.6570        | <b>727.3321</b> | 485.2239        |
|         | <b>778.2169</b>  | 389.6121        | 260.0771        | 6  | S      | 13 | <b>1286.6586</b> | <b>643.8330</b> | 429.5577        |
|         | 879.2645         | <b>440.1359</b> | 293.7597        | 7  | T      | 12 | 1199.6266        | <b>600.3170</b> | 400.5471        |
|         | <b>976.3173</b>  | <b>488.6623</b> | 326.1106        | 8  | P      | 11 | 1098.5789        | <b>549.7931</b> | 366.8645        |
|         | <b>1075.3857</b> | <b>538.1965</b> | 359.1334        | 9  | V      | 10 | 1001.5262        | 501.2667        | 334.5136        |
|         | 1189.4286        | <b>595.2180</b> | 397.1477        | 10 | N      | 9  | <b>902.4578</b>  | <b>451.7325</b> | 301.4908        |
|         | 1304.4556        | 652.7314        | 435.4900        | 11 | D      | 8  | <b>788.4148</b>  | 394.7111        | 263.4765        |
|         | 1403.5240        | <b>702.2656</b> | 468.5128        | 12 | V      | 7  | <b>673.3879</b>  | <b>337.1976</b> | 225.1342        |
|         | 1500.5767        | 750.7920        | <b>500.8638</b> | 13 | P      | 6  | <b>574.3195</b>  | <b>287.6634</b> | 192.1114        |
|         | 1601.6244        | 801.3159        | <b>534.5463</b> | 14 | T      | 5  | 477.2667         | 239.1370        | 159.7604        |
|         | 1702.6721        | <b>851.8397</b> | 568.2289        | 15 | T      | 4  | 376.2190         | 188.6132        | 126.0779        |
|         | 1773.7092        | <b>887.3582</b> | <b>591.9079</b> | 16 | A      | 3  | 275.1714         | 138.0893        | 92.3953         |
|         | 1830.7307        | 915.8690        | 610.9151        | 17 | G      | 2  | 204.1343         | 102.5708        | 68.7163         |
|         |                  |                 |                 | 18 | K      | 1  | 147.1128         | 74.0600         | 49.7091         |

# Annotated spectra from Saleem et. al. 2009

R.NNS<sub>167</sub>NS<sub>167</sub>NLLFEK<sub>136</sub>-N/2

0.8732

1e+04

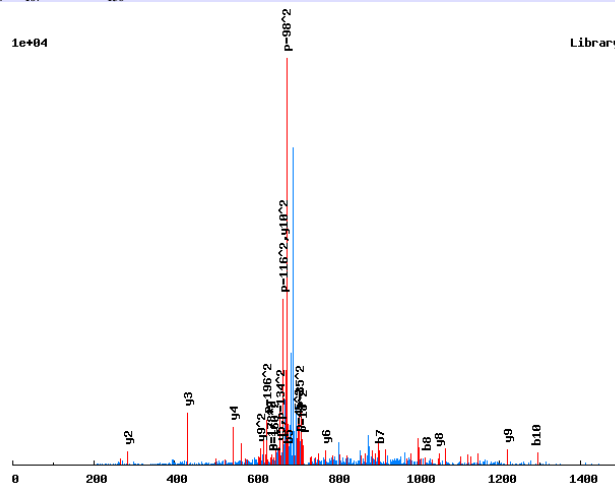

| Library | b <sup>1+</sup> | b <sup>2+</sup> | #  | AA     | #  | y <sup>1+</sup> | y <sup>2+</sup> |
|---------|-----------------|-----------------|----|--------|----|-----------------|-----------------|
|         | 115.0502        | 58.0287         | 1  | N      | 11 |                 |                 |
|         | 229.0931        | 115.0502        | 2  | N      | 10 | 1333.5316       | 667.2695        |
|         | 396.0915        | 198.5494        | 3  | S[167] | 9  | 1219.4887       | 610.2480        |
|         | 510.1344        | 255.5709        | 4  | N      | 8  | 1052.4903       | 526.7488        |
|         | 677.1328        | 339.0700        | 5  | S[167] | 7  | 938.4474        | 469.7273        |
|         | 791.1757        | 396.0915        | 6  | N      | 6  | 771.4490        | 386.2282        |
|         | 904.2598        | 452.6335        | 7  | L      | 5  | 657.4061        | 329.2067        |
|         | 1017.3438       | 509.1756        | 8  | L      | 4  | 544.3221        | 272.6647        |
|         | 1164.4123       | 582.7098        | 9  | F      | 3  | 431.2380        | 216.1226        |
|         | 1293.4548       | 647.2311        | 10 | E      | 2  | 284.1696        | 142.5884        |
|         |                 |                 | 11 | K[136] | 1  | 155.1270        | 78.0671         |

# Annotated spectra from Saleem et. al. 2009

K.NPNLS<sub>167</sub>FDSHPPR.V/2

0.9993

1e+04

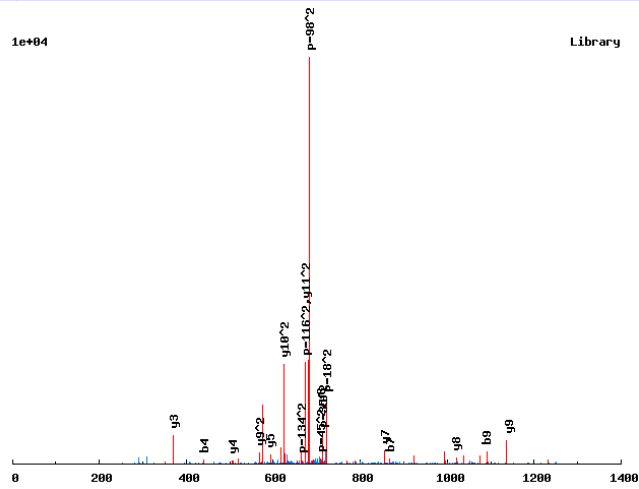

| Library | b <sup>1+</sup> | b <sup>2+</sup> | #  | AA     | #  | y <sup>1+</sup> | y <sup>2+</sup> |
|---------|-----------------|-----------------|----|--------|----|-----------------|-----------------|
|         | 115.0502        | 58.0287         | 1  | N      | 12 |                 |                 |
|         | 212.1030        | 106.5551        | 2  | P      | 11 | 1346.5889       | 673.7981        |
|         | 326.1459        | 163.5766        | 3  | N      | 10 | 1249.5361       | 625.2717        |
|         | 439.2300        | 220.1186        | 4  | L      | 9  | 1135.4932       | 568.2502        |
|         | 606.2283        | 303.6178        | 5  | S[167] | 8  | 1022.4091       | 511.7082        |
|         | 753.2967        | 377.1520        | 6  | F      | 7  | 855.4108        | 428.2090        |
|         | 868.3237        | 434.6655        | 7  | D      | 6  | 708.3424        | 354.6748        |
|         | 955.3557        | 478.1815        | 8  | S      | 5  | 593.3154        | 297.1613        |
|         | 1092.4146       | 546.7109        | 9  | H      | 4  | 506.2834        | 253.6453        |
|         | 1189.4674       | 595.2373        | 10 | P      | 3  | 369.2245        | 185.1159        |
|         | 1286.5201       | 643.7637        | 11 | P      | 2  | 272.1717        | 136.5895        |
|         |                 |                 | 12 | R      | 1  | 175.1190        | 88.0631         |

# Annotated spectra from Saleem et. al. 2009

K.NQS<sub>167</sub>RT<sub>181</sub>NSFDMPQLNTR.T/3

0.9941

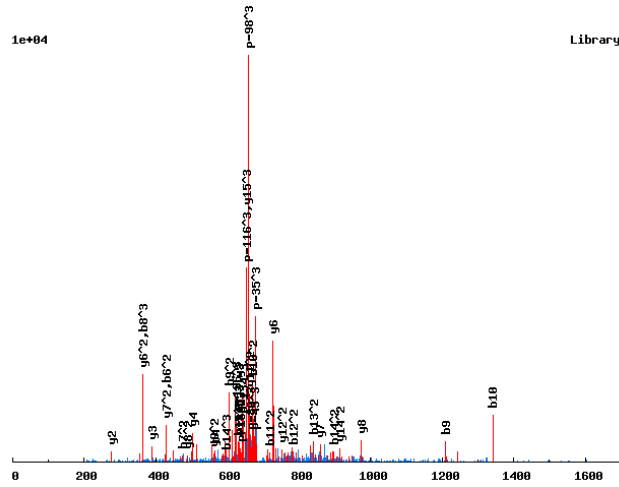

| Library | b <sup>1+</sup> | b <sup>2+</sup> | b <sup>3+</sup> | #  | AA     | #  | y <sup>1+</sup> | y <sup>2+</sup> | y <sup>3+</sup> |
|---------|-----------------|-----------------|-----------------|----|--------|----|-----------------|-----------------|-----------------|
|         | 115.0502        | 58.0287         | 39.0216         | 1  | N      | 16 |                 |                 |                 |
|         | 243.1088        | 122.0580        | 81.7078         | 2  | Q      | 15 | 1954.7878       | 977.8976        | 652.2675        |
|         | 410.1072        | 205.5572        | 137.3739        | 3  | S[167] | 14 | 1826.7292       | 913.8683        | 609.5813        |
|         | 566.2083        | 283.6078        | 189.4076        | 4  | R      | 13 | 1659.7309       | 830.3691        | 553.9151        |
|         | 747.2223        | 374.1148        | 249.7456        | 5  | T[181] | 12 | 1503.6298       | 752.3185        | 501.8814        |
|         | 861.2652        | 431.1362        | 287.7599        | 6  | N      | 11 | 1322.6158       | 661.8115        | 441.5434        |
|         | 948.2972        | 474.6523        | 316.7706        | 7  | S      | 10 | 1208.5728       | 604.7901        | 403.5291        |
|         | 1095.3656       | 548.1865        | 365.7934        | 8  | F      | 9  | 1121.5408       | 561.2740        | 374.5185        |
|         | 1210.3926       | 605.6999        | 404.1357        | 9  | D      | 8  | 974.4724        | 487.7398        | 325.4957        |
|         | 1341.4331       | 671.2202        | 447.8159        | 10 | M      | 7  | 859.4455        | 430.2264        | 287.1533        |
|         | 1438.4858       | 719.7466        | 480.1668        | 11 | P      | 6  | 728.4050        | 364.7061        | 243.4732        |
|         | 1566.5444       | 783.7758        | 522.8530        | 12 | Q      | 5  | 631.3522        | 316.1797        | 211.1223        |
|         | 1679.6285       | 840.3179        | 560.5477        | 13 | L      | 4  | 503.2936        | 252.1504        | 168.4361        |
|         | 1793.6714       | 897.3393        | 598.5620        | 14 | N      | 3  | 390.2096        | 195.6084        | 130.7414        |
|         | 1894.7191       | 947.8632        | 632.2445        | 15 | T      | 2  | 276.1666        | 138.5870        | 92.7271         |
|         |                 |                 |                 | 16 | R      | 1  | 175.1190        | 88.0631         | 59.0445         |

# Annotated spectra from Saleem et. al. 2009

R.NQS<sub>167</sub>VEDLSFLEQGYQHR.Y/3

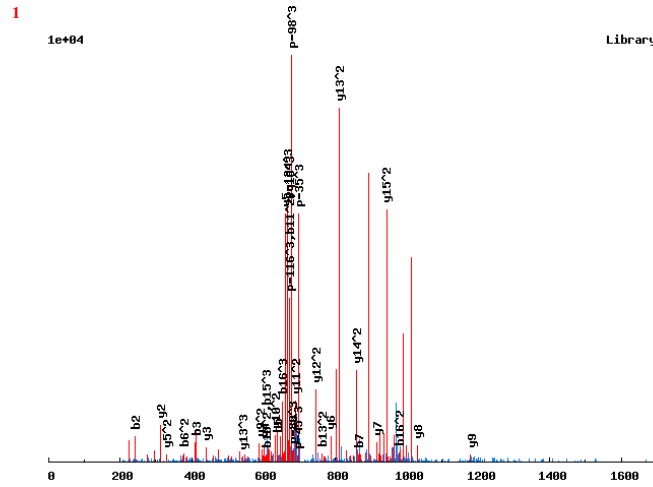

| Library | b <sup>1+</sup> | b <sup>2+</sup> | b <sup>3+</sup> | #  | AA     | #  | y <sup>1+</sup>  | y <sup>2+</sup> | y <sup>3+</sup> |
|---------|-----------------|-----------------|-----------------|----|--------|----|------------------|-----------------|-----------------|
|         | 115.0502        | 58.0287         | 39.0216         | 1  | N      | 17 |                  |                 |                 |
|         | <b>243.1088</b> | 122.0580        | 81.7078         | 2  | Q      | 16 | 2015.8858        | 1008.4466       | <b>672.6335</b> |
|         | <b>410.1072</b> | 205.5572        | 137.3739        | 3  | S[167] | 15 | 1887.8273        | <b>944.4173</b> | 629.9473        |
|         | 509.1756        | 255.0914        | 170.3967        | 4  | V      | 14 | 1720.8289        | <b>860.9181</b> | 574.2812        |
|         | <b>638.2182</b> | 319.6127        | 213.4109        | 5  | E      | 13 | 1621.7605        | <b>811.3839</b> | <b>541.2584</b> |
|         | 753.2451        | <b>377.1262</b> | 251.7532        | 6  | D      | 12 | 1492.7179        | <b>746.8626</b> | 498.2442        |
|         | <b>866.3292</b> | 433.6682        | 289.4479        | 7  | L      | 11 | 1377.6910        | <b>689.3491</b> | 459.9018        |
|         | 953.3612        | 477.1842        | 318.4586        | 8  | S      | 10 | 1264.6069        | <b>632.8071</b> | 422.2072        |
|         | 1100.4296       | 550.7184        | 367.4814        | 9  | F      | 9  | <b>1177.5749</b> | <b>589.2911</b> | 393.1965        |
|         | 1213.5137       | <b>607.2605</b> | 405.1761        | 10 | L      | 8  | <b>1030.5065</b> | 515.7569        | 344.1737        |
|         | 1342.5562       | <b>671.7818</b> | 448.1903        | 11 | E      | 7  | <b>917.4224</b>  | 459.2148        | 306.4790        |
|         | 1470.6148       | 735.8111        | 490.8765        | 12 | Q      | 6  | <b>788.3798</b>  | 394.6935        | 263.4648        |
|         | 1527.6363       | <b>764.3218</b> | 509.8836        | 13 | G      | 5  | <b>660.3212</b>  | <b>330.6643</b> | 220.7786        |
|         | 1690.6996       | 845.8534        | 564.2381        | 14 | Y      | 4  | <b>603.2998</b>  | 302.1535        | 201.7714        |
|         | 1818.7582       | 909.8827        | <b>606.9243</b> | 15 | Q      | 3  | <b>440.2364</b>  | 220.6219        | 147.4170        |
|         | 1955.8171       | <b>978.4122</b> | <b>652.6106</b> | 16 | H      | 2  | <b>312.1779</b>  | 156.5926        | 104.7308        |
|         |                 |                 |                 | 17 | R      | 1  | 175.1190         | 88.0631         | 59.0445         |

# Annotated spectra from Saleem et. al. 2009

R.NQS<sub>167</sub>VLS<sub>167</sub>LYK.T/2

0.9974

1e+04

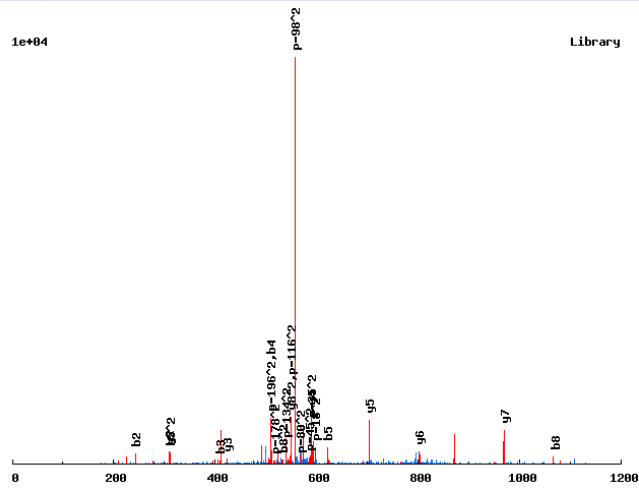

| Library | b <sup>1+</sup> | b <sup>2+</sup> | # | AA      | # | y <sup>1+</sup> | y <sup>2+</sup> |
|---------|-----------------|-----------------|---|---------|---|-----------------|-----------------|
|         | 115.0502        | 58.0287         | 1 | N       | 9 |                 |                 |
|         | 243.1088        | 122.0580        | 2 | Q       | 8 | 1097.4680       | 549.2376        |
|         | 410.1072        | 205.5572        | 3 | S [167] | 7 | 969.4094        | 485.2083        |
|         | 509.1756        | 255.0914        | 4 | V       | 6 | 802.4110        | 401.7092        |
|         | 622.2596        | 311.6335        | 5 | L       | 5 | 703.3426        | 352.1749        |
|         | 789.2580        | 395.1326        | 6 | S [167] | 4 | 590.2586        | 295.6329        |
|         | 902.3420        | 451.6747        | 7 | L       | 3 | 423.2602        | 212.1337        |
|         | 1065.4054       | 533.2063        | 8 | Y       | 2 | 310.1761        | 155.5917        |
|         |                 |                 | 9 | K       | 1 | 147.1128        | 74.0600         |

Annotated spectra from Saleem et. al. 2009

K.NQS<sub>167</sub>VS<sub>167</sub>ASEDEKEILNNAEGHKPQR.L/3

0.8784

1e+04

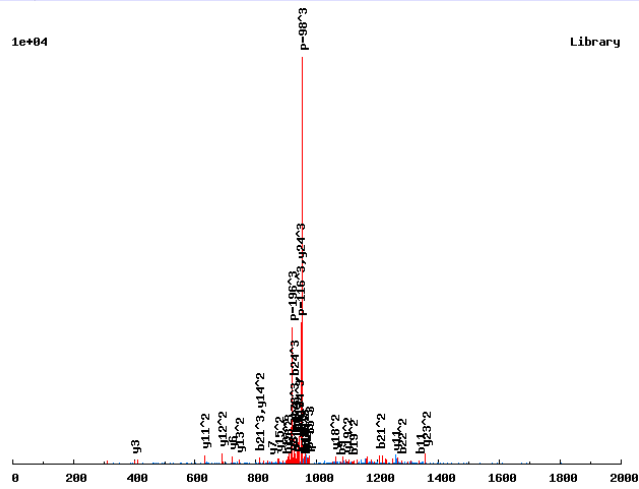

| Library | b <sup>1+</sup> | b <sup>2+</sup> | b <sup>3+</sup> | #  | AA     | #  | y <sup>1+</sup> | y <sup>2+</sup> | y <sup>3+</sup> |
|---------|-----------------|-----------------|-----------------|----|--------|----|-----------------|-----------------|-----------------|
|         | 115.0502        | 58.0287         | 39.0216         | 1  | N      | 25 |                 |                 |                 |
|         | 243.1088        | 122.0580        | 81.7078         | 2  | Q      | 24 | 2840.2248       | 1420.6160       | 947.4131        |
|         | 410.1072        | 205.5572        | 137.3739        | 3  | S[167] | 23 | 2712.1662       | 1356.5867       | 904.7269        |
|         | 509.1756        | 255.0914        | 170.3967        | 4  | V      | 22 | 2545.1678       | 1273.0875       | 849.0608        |
|         | 676.1739        | 338.5906        | 226.0628        | 5  | S[167] | 21 | 2446.0994       | 1223.5533       | 816.0380        |
|         | 747.2110        | 374.1092        | 249.7419        | 6  | A      | 20 | 2279.1010       | 1140.0542       | 760.3719        |
|         | 834.2431        | 417.6252        | 278.7525        | 7  | S      | 19 | 2208.0639       | 1104.5356       | 736.6928        |
|         | 963.2857        | 482.1465        | 321.7667        | 8  | E      | 18 | 2121.0319       | 1061.0196       | 707.6822        |
|         | 1078.3126       | 539.6599        | 360.1091        | 9  | D      | 17 | 1991.9893       | 996.4983        | 664.6680        |
|         | 1207.3552       | 604.1812        | 403.1232        | 10 | E      | 16 | 1876.9624       | 938.9848        | 626.3256        |
|         | 1335.4501       | 668.2287        | 445.8216        | 11 | K      | 15 | 1747.9198       | 874.4635        | 583.3114        |
|         | 1464.4927       | 732.7500        | 488.8358        | 12 | E      | 14 | 1619.8248       | 810.4160        | 540.6131        |
|         | 1577.5768       | 789.2920        | 526.5305        | 13 | I      | 13 | 1490.7822       | 745.8948        | 497.5989        |
|         | 1690.6609       | 845.8341        | 564.2251        | 14 | L      | 12 | 1377.6982       | 689.3527        | 459.9042        |
|         | 1804.7038       | 902.8555        | 602.2394        | 15 | N      | 11 | 1264.6141       | 632.8107        | 422.2096        |
|         | 1918.7467       | 959.8770        | 640.2538        | 16 | N      | 10 | 1150.5712       | 575.7892        | 384.1952        |
|         | 2032.7896       | 1016.8985       | 678.2681        | 17 | N      | 9  | 1036.5283       | 518.7678        | 346.1809        |
|         | 2103.8268       | 1052.4170       | 701.9471        | 18 | A      | 8  | 922.4853        | 461.7463        | 308.1666        |
|         | 2232.8693       | 1116.9383       | 744.9613        | 19 | E      | 7  | 851.4482        | 426.2277        | 284.4876        |
|         | 2289.8908       | 1145.4490       | 763.9685        | 20 | G      | 6  | 722.4056        | 361.7065        | 241.4734        |
|         | 2426.9497       | 1213.9785       | 809.6548        | 21 | H      | 5  | 665.3842        | 333.1957        | 222.4662        |
|         | 2555.0447       | 1278.0260       | 852.3531        | 22 | K      | 4  | 528.3253        | 264.6663        | 176.7799        |
|         | 2652.0974       | 1326.5524       | 884.7040        | 23 | P      | 3  | 400.2303        | 200.6188        | 134.0816        |
|         | 2780.1560       | 1390.5816       | 927.3902        | 24 | Q      | 2  | 303.1775        | 152.0924        | 101.7307        |
|         |                 |                 |                 | 25 | R      | 1  | 175.1190        | 88.0631         | 59.0445         |

# Annotated spectra from Saleem et. al. 2009

R.NQTDLK<sub>136</sub>PFPSAGS<sub>167</sub>ASSS<sub>167</sub>IK<sub>136</sub>T/3

0.998

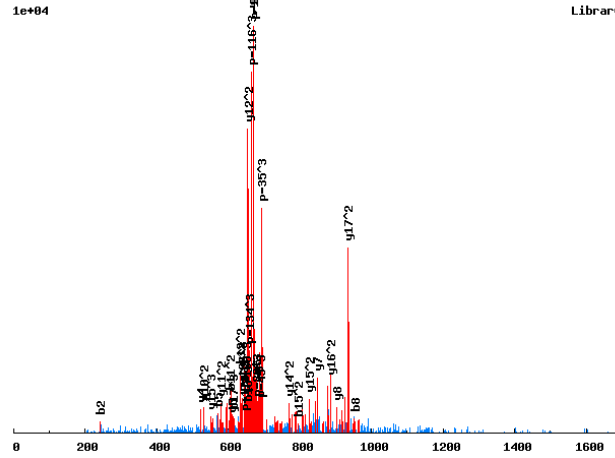

| Library | b <sup>1+</sup> | b <sup>2+</sup> | b <sup>3+</sup> | #  | AA     | #  | y <sup>1+</sup> | y <sup>2+</sup> | y <sup>3+</sup> |
|---------|-----------------|-----------------|-----------------|----|--------|----|-----------------|-----------------|-----------------|
|         | 115.0502        | 58.0287         | 39.0216         | 1  | N      | 19 |                 |                 |                 |
|         | <b>243.1088</b> | 122.0580        | 81.7078         | 2  | Q      | 18 | 1996.8999       | 998.9536        | <b>666.3048</b> |
|         | 344.1565        | 172.5819        | 115.3903        | 3  | T      | 17 | 1868.8413       | <b>934.9243</b> | 623.6186        |
|         | 459.1834        | 230.0953        | 153.7327        | 4  | D      | 16 | 1767.7936       | <b>884.4005</b> | 589.9361        |
|         | <b>572.2675</b> | 286.6374        | 191.4273        | 5  | L      | 15 | 1652.7667       | <b>826.8870</b> | <b>551.5938</b> |
|         | 708.3766        | 354.6920        | 236.7971        | 6  | K[136] | 14 | 1539.6826       | <b>770.3450</b> | 513.8991        |
|         | 805.4294        | 403.2183        | 269.1480        | 7  | P      | 13 | 1403.5735       | 702.2904        | 468.5293        |
|         | <b>952.4978</b> | 476.7525        | 318.1708        | 8  | F      | 12 | 1306.5207       | <b>653.7640</b> | 436.1784        |
|         | 1049.5506       | 525.2789        | 350.5217        | 9  | P      | 11 | 1159.4523       | <b>580.2298</b> | 387.1556        |
|         | 1136.5826       | 568.7949        | 379.5324        | 10 | S      | 10 | 1062.3996       | <b>531.7034</b> | 354.8047        |
|         | 1207.6197       | <b>604.3135</b> | 403.2114        | 11 | A      | 9  | 975.3675        | 488.1874        | 325.7940        |
|         | 1264.6412       | <b>632.8242</b> | 422.2186        | 12 | G      | 8  | <b>904.3304</b> | 452.6688        | 302.1150        |
|         | 1431.6395       | 716.3234        | 477.8847        | 13 | S[167] | 7  | <b>847.3090</b> | 424.1581        | 283.1078        |
|         | 1502.6766       | 751.8420        | 501.5637        | 14 | A      | 6  | <b>680.3106</b> | 340.6589        | 227.4417        |
|         | 1589.7087       | <b>795.3580</b> | 530.5744        | 15 | S      | 5  | <b>609.2735</b> | 305.1404        | 203.7627        |
|         | 1676.7407       | 838.8740        | 559.5851        | 16 | S      | 4  | <b>522.2415</b> | 261.6244        | 174.7520        |
|         | 1843.7391       | 922.3732        | <b>615.2512</b> | 17 | S[167] | 3  | 435.2094        | 218.1083        | 145.7413        |
|         | 1956.8231       | 978.9152        | <b>652.9459</b> | 18 | I      | 2  | 268.2111        | 134.6092        | 90.0752         |
|         |                 |                 |                 | 19 | K[136] | 1  | 155.1270        | 78.0671         | 52.3805         |



# Annotated spectra from Saleem et. al. 2009

R.NRDS<sub>167</sub>GYGVSVGR.I/3

0.8684

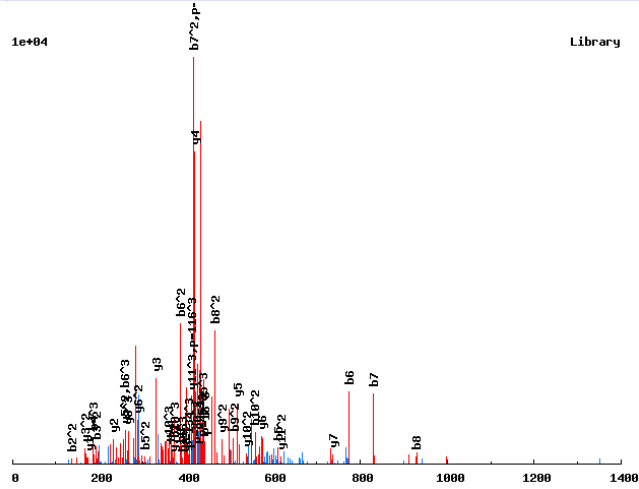

| Library | b <sup>1+</sup> | b <sup>2+</sup> | b <sup>3+</sup> | #  | AA     | #  | y <sup>1+</sup> | y <sup>2+</sup> | y <sup>3+</sup> |
|---------|-----------------|-----------------|-----------------|----|--------|----|-----------------|-----------------|-----------------|
|         | 115.0502        | 58.0287         | 39.0216         | 1  | N      | 12 |                 |                 |                 |
|         | 271.1513        | 136.0793        | 91.0553         | 2  | R      | 11 | 1232.5419       | 616.7746        | 411.5188        |
|         | 386.1783        | 193.5928        | 129.3976        | 3  | D      | 10 | 1076.4408       | 538.7240        | 359.4851        |
|         | 553.1766        | 277.0920        | 185.0637        | 4  | S[167] | 9  | 961.4139        | 481.2106        | 321.1428        |
|         | 610.1981        | 305.6027        | 204.0709        | 5  | G      | 8  | 794.4155        | 397.7114        | 265.4767        |
|         | 773.2614        | 387.1343        | 258.4253        | 6  | Y      | 7  | 737.3941        | 369.2007        | 246.4695        |
|         | 830.2829        | 415.6451        | 277.4325        | 7  | G      | 6  | 574.3307        | 287.6690        | 192.1151        |
|         | 929.3513        | 465.1793        | 310.4553        | 8  | V      | 5  | 517.3093        | 259.1583        | 173.1079        |
|         | 1016.3833       | 508.6953        | 339.4660        | 9  | S      | 4  | 418.2408        | 209.6241        | 140.0851        |
|         | 1115.4517       | 558.2295        | 372.4888        | 10 | V      | 3  | 331.2088        | 166.1080        | 111.0745        |
|         | 1172.4732       | 586.7402        | 391.4959        | 11 | G      | 2  | 232.1404        | 116.5738        | 78.0517         |
|         |                 |                 |                 | 12 | R      | 1  | 175.1190        | 88.0631         | 59.0445         |

# Annotated spectra from Saleem et. al. 2009

K.NRELAAVS<sub>167</sub>S<sub>167</sub>DEDNEDHDIA.R.A/3

0.9995

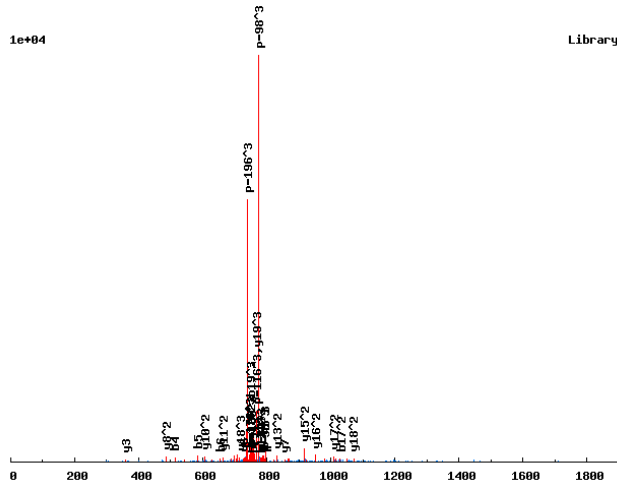

| Library | b <sup>1+</sup> | b <sup>2+</sup> | b <sup>3+</sup> | #  | AA     | #  | y <sup>1+</sup> | y <sup>2+</sup> | y <sup>3+</sup> |
|---------|-----------------|-----------------|-----------------|----|--------|----|-----------------|-----------------|-----------------|
|         | 115.0502        | 58.0287         | 39.0216         | 1  | N      | 20 |                 |                 |                 |
|         | 271.1513        | 136.0793        | 91.0553         | 2  | R      | 19 | 2301.9020       | 1151.4546       | 767.9722        |
|         | 400.1939        | 200.6006        | 134.0695        | 3  | E      | 18 | 2145.8009       | 1073.4041       | 715.9385        |
|         | 513.2780        | 257.1426        | 171.7642        | 4  | L      | 17 | 2016.7583       | 1008.8828       | 672.9243        |
|         | 584.3151        | 292.6612        | 195.4432        | 5  | A      | 16 | 1903.6743       | 952.3408        | 635.2296        |
|         | 655.3522        | 328.1797        | 219.1223        | 6  | A      | 15 | 1832.6371       | 916.8222        | 611.5506        |
|         | 754.4206        | 377.7139        | 252.1451        | 7  | V      | 14 | 1761.6000       | 881.3037        | 587.8715        |
|         | 921.4190        | 461.2131        | 307.8112        | 8  | S[167] | 13 | 1662.5316       | 831.7695        | 554.8487        |
|         | 1088.4173       | 544.7123        | 363.4773        | 9  | S[167] | 12 | 1495.5333       | 748.2703        | 499.1826        |
|         | 1203.4443       | 602.2258        | 401.8196        | 10 | D      | 11 | 1328.5349       | 664.7711        | 443.5165        |
|         | 1332.4869       | 666.7471        | 444.8338        | 11 | E      | 10 | 1213.5080       | 607.2576        | 405.1742        |
|         | 1447.5138       | 724.2605        | 483.1761        | 12 | D      | 9  | 1084.4654       | 542.7363        | 362.1600        |
|         | 1561.5567       | 781.2820        | 521.1904        | 13 | N      | 8  | 969.4384        | 485.2229        | 323.8177        |
|         | 1690.5993       | 845.8033        | 564.2046        | 14 | E      | 7  | 855.3955        | 428.2014        | 285.8034        |
|         | 1805.6263       | 903.3168        | 602.5469        | 15 | D      | 6  | 726.3529        | 363.6801        | 242.7892        |
|         | 1942.6852       | 971.8462        | 648.2332        | 16 | H      | 5  | 611.3260        | 306.1666        | 204.4468        |
|         | 2057.7121       | 1029.3597       | 686.5756        | 17 | D      | 4  | 474.2671        | 237.6372        | 158.7605        |
|         | 2170.7962       | 1085.9017       | 724.2702        | 18 | I      | 3  | 359.2401        | 180.1237        | 120.4182        |
|         | 2241.8333       | 1121.4203       | 747.9493        | 19 | A      | 2  | 246.1561        | 123.5817        | 82.7235         |
|         |                 |                 |                 | 20 | R      | 1  | 175.1190        | 88.0631         | 59.0445         |

# Annotated spectra from Saleem et. al. 2009

K.NRS<sub>167</sub>PS<sub>167</sub>PPVYDAQGK.R/3

0.9999

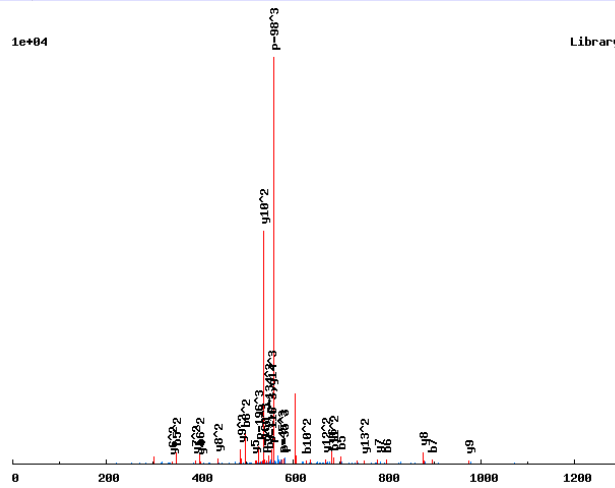

| Library | b <sup>1+</sup> | b <sup>2+</sup> | b <sup>3+</sup> | #  | AA     | #  | y <sup>1+</sup> | y <sup>2+</sup> | y <sup>3+</sup> |
|---------|-----------------|-----------------|-----------------|----|--------|----|-----------------|-----------------|-----------------|
|         | 115.0502        | 58.0287         | 39.0216         | 1  | N      | 15 |                 |                 |                 |
|         | 271.1513        | 136.0793        | 91.0553         | 2  | R      | 14 | 1658.6975       | 829.8524        | <b>553.5707</b> |
|         | 438.1497        | 219.5785        | 146.7214        | 3  | S[167] | 13 | 1502.5964       | <b>751.8018</b> | 501.5370        |
|         | 535.2024        | 268.1049        | 179.0723        | 4  | P      | 12 | 1335.5980       | <b>668.3027</b> | 445.8709        |
|         | <b>702.2008</b> | <b>351.6040</b> | 234.7385        | 5  | S[167] | 11 | 1238.5453       | 619.7763        | 413.5199        |
|         | <b>799.2536</b> | <b>400.1304</b> | 267.0894        | 6  | P      | 10 | 1071.5469       | <b>536.2771</b> | 357.8538        |
|         | <b>896.3063</b> | 448.6568        | 299.4403        | 7  | P      | 9  | <b>974.4942</b> | <b>487.7507</b> | 325.5029        |
|         | 993.3591        | <b>497.1832</b> | 331.7912        | 8  | P      | 8  | <b>877.4414</b> | <b>439.2243</b> | 293.1520        |
|         | 1092.4275       | <b>546.7174</b> | 364.8140        | 9  | V      | 7  | <b>780.3886</b> | <b>390.6980</b> | 260.8011        |
|         | 1255.4908       | <b>628.2491</b> | 419.1685        | 10 | Y      | 6  | <b>681.3202</b> | <b>341.1638</b> | 227.7783        |
|         | 1370.5178       | <b>685.7625</b> | 457.5108        | 11 | D      | 5  | <b>518.2569</b> | 259.6321        | 173.4238        |
|         | 1441.5549       | 721.2811        | 481.1898        | 12 | A      | 4  | <b>403.2299</b> | 202.1186        | 135.0815        |
|         | 1569.6135       | 785.3104        | 523.8760        | 13 | Q      | 3  | 332.1928        | 166.6001        | 111.4025        |
|         | 1626.6349       | 813.8211        | 542.8832        | 14 | G      | 2  | 204.1343        | 102.5708        | 68.7163         |
|         |                 |                 |                 | 15 | K      | 1  | 147.1128        | 74.0600         | 49.7091         |

# Annotated spectra from Saleem et. al. 2009

R.NRS<sub>167</sub>RS<sub>167</sub>PPAPFSQPSTGR.K/3

0.9959

1e+04

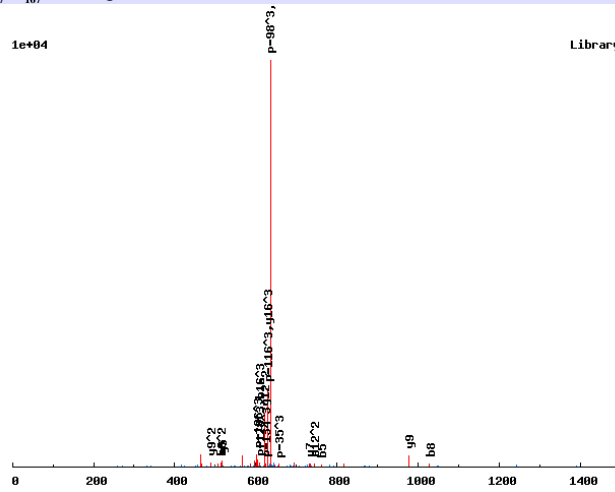

| Library | b <sup>1+</sup> | b <sup>2+</sup> | b <sup>3+</sup> | #  | AA     | #  | y <sup>1+</sup> | y <sup>2+</sup> | y <sup>3+</sup> |
|---------|-----------------|-----------------|-----------------|----|--------|----|-----------------|-----------------|-----------------|
|         | 115.0502        | 58.0287         | 39.0216         | 1  | N      | 17 |                 |                 |                 |
|         | 271.1513        | 136.0793        | 91.0553         | 2  | R      | 16 | 1887.8262       | 944.4168        | 629.9469        |
|         | 438.1497        | 219.5785        | 146.7214        | 3  | S[167] | 15 | 1731.7251       | 866.3662        | 577.9132        |
|         | 594.2508        | 297.6290        | 198.7551        | 4  | R      | 14 | 1564.7268       | 782.8670        | 522.2471        |
|         | 761.2492        | 381.1282        | 254.4212        | 5  | S[167] | 13 | 1408.6257       | 704.8165        | 470.2134        |
|         | 858.3019        | 429.6546        | 286.7722        | 6  | P      | 12 | 1241.6273       | 621.3173        | 414.5473        |
|         | 955.3547        | 478.1810        | 319.1231        | 7  | P      | 11 | 1144.5745       | 572.7909        | 382.1964        |
|         | 1026.3918       | 513.6995        | 342.8021        | 8  | A      | 10 | 1047.5218       | 524.2645        | 349.8454        |
|         | 1123.4445       | 562.2259        | 375.1530        | 9  | P      | 9  | 976.4847        | 488.7460        | 326.1664        |
|         | 1270.5130       | 635.7601        | 424.1758        | 10 | F      | 8  | 879.4319        | 440.2196        | 293.8155        |
|         | 1357.5450       | 679.2761        | 453.1865        | 11 | S      | 7  | 732.3635        | 366.6854        | 244.7927        |
|         | 1485.6036       | 743.3054        | 495.8727        | 12 | Q      | 6  | 645.3315        | 323.1694        | 215.7820        |
|         | 1582.6563       | 791.8318        | 528.2236        | 13 | P      | 5  | 517.2729        | 259.1401        | 173.0958        |
|         | 1669.6884       | 835.3478        | 557.2343        | 14 | S      | 4  | 420.2201        | 210.6137        | 140.7449        |
|         | 1770.7360       | 885.8717        | 590.9169        | 15 | T      | 3  | 333.1881        | 167.0977        | 111.7342        |
|         | 1827.7575       | 914.3824        | 609.9240        | 16 | G      | 2  | 232.1404        | 116.5738        | 78.0517         |
|         |                 |                 |                 | 17 | R      | 1  | 175.1190        | 88.0631         | 59.0445         |

# Annotated spectra from Saleem et. al. 2009

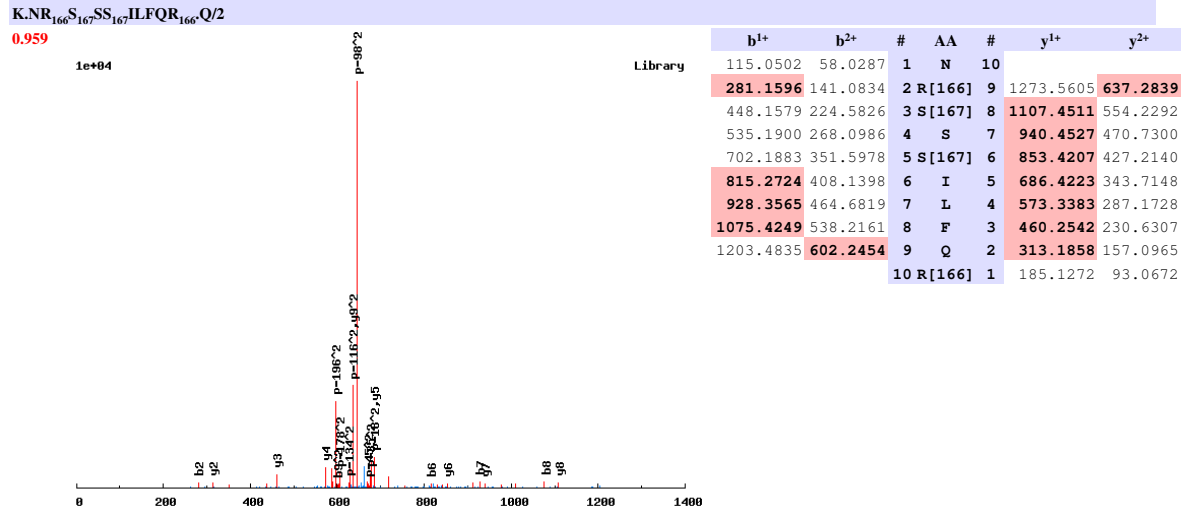

# Annotated spectra from Saleem et. al. 2009

K.NSAAPAS<sub>167</sub>.PLS<sub>167</sub>.NEHITSSTNSGSDANK.Q/3

0.9988

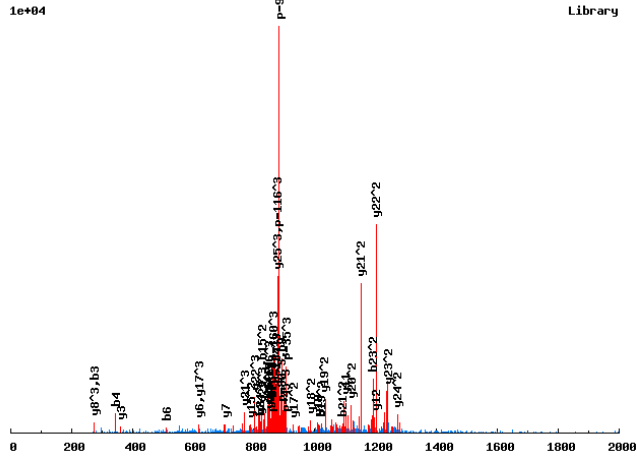

| Library | b <sup>1+</sup> | b <sup>2+</sup> | b <sup>3+</sup> | #  | AA     | #  | y <sup>1+</sup> | y <sup>2+</sup> | y <sup>3+</sup> |
|---------|-----------------|-----------------|-----------------|----|--------|----|-----------------|-----------------|-----------------|
|         | 115.0502        | 58.0287         | 39.0216         | 1  | N      | 26 |                 |                 |                 |
|         | 202.0822        | 101.5448        | 68.0323         | 2  | S      | 25 | 2631.0720       | 1316.0396       | 877.6955        |
|         | 273.1193        | 137.0633        | 91.7113         | 3  | A      | 24 | 2544.0399       | 1272.5236       | 848.6848        |
|         | 344.1565        | 172.5819        | 115.3903        | 4  | A      | 23 | 2473.0028       | 1237.0050       | 825.0058        |
|         | 441.2092        | 221.1082        | 147.7413        | 5  | P      | 22 | 2401.9657       | 1201.4865       | 801.3268        |
|         | 512.2463        | 256.6268        | 171.4203        | 6  | A      | 21 | 2304.9129       | 1152.9601       | 768.9758        |
|         | 679.2447        | 340.1260        | 227.0864        | 7  | S[167] | 20 | 2233.8758       | 1117.4416       | 745.2968        |
|         | 776.2975        | 388.6524        | 259.4373        | 8  | P      | 19 | 2066.8775       | 1033.9424       | 689.6307        |
|         | 889.3815        | 445.1944        | 297.1320        | 9  | L      | 18 | 1969.8247       | 985.4160        | 657.2798        |
|         | 1056.3799       | 528.6936        | 352.7981        | 10 | S[167] | 17 | 1856.7407       | 928.8740        | 619.5851        |
|         | 1170.4228       | 585.7150        | 390.8125        | 11 | N      | 16 | 1689.7423       | 845.3748        | 563.9189        |
|         | 1299.4654       | 650.2363        | 433.8267        | 12 | E      | 15 | 1575.6994       | 788.3533        | 525.9046        |
|         | 1436.5243       | 718.7658        | 479.5130        | 13 | H      | 14 | 1446.6568       | 723.8320        | 482.8904        |
|         | 1549.6084       | 775.3078        | 517.2076        | 14 | I      | 13 | 1309.5979       | 655.3026        | 437.2041        |
|         | 1650.6560       | 825.8317        | 550.8902        | 15 | T      | 12 | 1196.5138       | 598.7605        | 399.5095        |
|         | 1737.6881       | 869.3477        | 579.9009        | 16 | S      | 11 | 1095.4661       | 548.2367        | 365.8269        |
|         | 1824.7201       | 912.8637        | 608.9116        | 17 | S      | 10 | 1008.4341       | 504.7207        | 336.8162        |
|         | 1925.7678       | 963.3875        | 642.5941        | 18 | T      | 9  | 921.4021        | 461.2047        | 307.8055        |
|         | 2039.8107       | 1020.4090       | 680.6084        | 19 | N      | 8  | 820.3544        | 410.6808        | 274.1230        |
|         | 2126.8427       | 1063.9250       | 709.6191        | 20 | S      | 7  | 706.3115        | 353.6594        | 236.1087        |
|         | 2183.8642       | 1092.4357       | 728.6263        | 21 | G      | 6  | 619.2794        | 310.1434        | 207.0980        |
|         | 2270.8962       | 1135.9518       | 757.6369        | 22 | S      | 5  | 562.2580        | 281.6326        | 188.0908        |
|         | 2385.9232       | 1193.4652       | 795.9792        | 23 | D      | 4  | 475.2259        | 238.1166        | 159.0802        |
|         | 2456.9603       | 1228.9838       | 819.6583        | 24 | A      | 3  | 360.1990        | 180.6031        | 120.7378        |
|         | 2571.0032       | 1286.0052       | 857.6726        | 25 | N      | 2  | 289.1619        | 145.0846        | 97.0588         |
|         |                 |                 |                 | 26 | R      | 1  | 175.1190        | 88.0631         | 59.0445         |

# Annotated spectra from Saleem et. al. 2009

R.NSAQDLENS<sub>167</sub>PM<sub>147</sub>S<sub>167</sub>VGK<sub>136</sub>DNR<sub>166</sub>N/3

0.9627

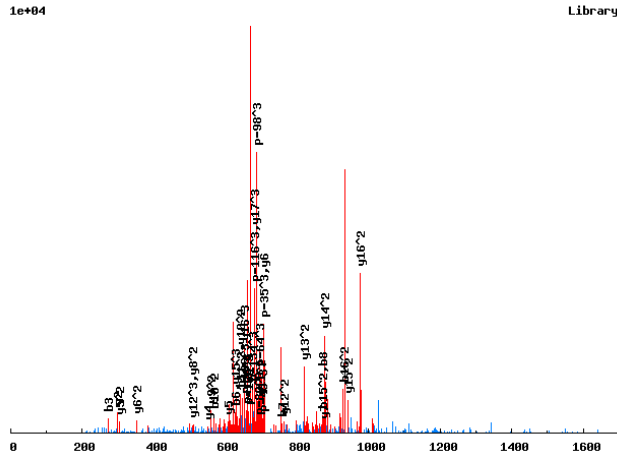

| Library | b <sup>1+</sup> | b <sup>2+</sup> | b <sup>3+</sup> | #  | AA     | #  | y <sup>1+</sup> | y <sup>2+</sup> | y <sup>3+</sup> |
|---------|-----------------|-----------------|-----------------|----|--------|----|-----------------|-----------------|-----------------|
|         | 115.0502        | 58.0287         | 39.0216         | 1  | N      | 18 |                 |                 |                 |
|         | 202.0822        | 101.5448        | 68.0323         | 2  | S      | 17 | 2041.8052       | 1021.4063       | 681.2733        |
|         | 273.1193        | 137.0633        | 91.7113         | 3  | A      | 16 | 1954.7732       | 977.8902        | 652.2626        |
|         | 401.1779        | 201.0926        | 134.3975        | 4  | Q      | 15 | 1883.7361       | 942.3717        | 628.5836        |
|         | 516.2049        | 258.6061        | 172.7398        | 5  | D      | 14 | 1755.6775       | 878.3424        | 585.8974        |
|         | 629.2889        | 315.1481        | 210.4345        | 6  | L      | 13 | 1640.6506       | 820.8289        | 547.5550        |
|         | 758.3315        | 379.6694        | 253.4487        | 7  | E      | 12 | 1527.5665       | 764.2869        | 509.8604        |
|         | 872.3745        | 436.6909        | 291.4630        | 8  | N      | 11 | 1398.5239       | 699.7656        | 466.8462        |
|         | 1039.3728       | 520.1900        | 347.1291        | 9  | S[167] | 10 | 1284.4810       | 642.7441        | 428.8319        |
|         | 1136.4256       | 568.7164        | 379.4800        | 10 | P      | 9  | 1117.4826       | 559.2450        | 373.1657        |
|         | 1283.4610       | 642.2341        | 428.4918        | 11 | M[147] | 8  | 1020.4299       | 510.7186        | 340.8148        |
|         | 1450.4593       | 725.7333        | 484.1580        | 12 | S[167] | 7  | 873.3945        | 437.2009        | 291.8030        |
|         | 1549.5277       | 775.2675        | 517.1808        | 13 | V      | 6  | 706.3961        | 353.7017        | 236.1369        |
|         | 1606.5492       | 803.7782        | 536.1879        | 14 | G      | 5  | 607.3277        | 304.1675        | 203.1141        |
|         | 1742.6584       | 871.8328        | 581.5576        | 15 | K[136] | 4  | 550.3062        | 275.6568        | 184.1069        |
|         | 1857.6853       | 929.3463        | 619.9000        | 16 | D      | 3  | 414.1971        | 207.6022        | 138.7372        |
|         | 1971.7282       | 986.3678        | 657.9143        | 17 | N      | 2  | 299.1701        | 150.0887        | 100.3949        |
|         |                 |                 |                 | 18 | R[166] | 1  | 185.1272        | 93.0672         | 62.3806         |

# Annotated spectra from Saleem et. al. 2009

R.NS<sub>167</sub>EGSS<sub>167</sub>PC<sub>160</sub>YNDDQIR.Q/2

0.9994

1e+04

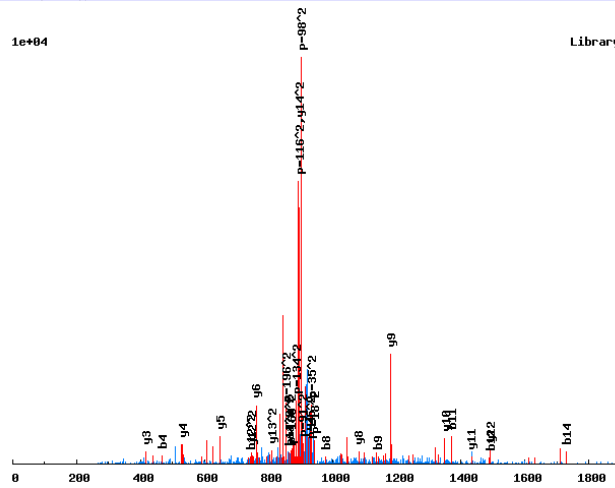

| Library | b <sup>1+</sup> | b <sup>2+</sup> | #  | AA     | #  | y <sup>1+</sup> | y <sup>2+</sup> |
|---------|-----------------|-----------------|----|--------|----|-----------------|-----------------|
|         | 115.0502        | 58.0287         | 1  | N      | 15 |                 |                 |
|         | 282.0486        | 141.5279        | 2  | S[167] | 14 | 1787.5979       | 894.3026        |
|         | 411.0912        | 206.0492        | 3  | E      | 13 | 1620.5996       | 810.8034        |
|         | 468.1126        | 234.5600        | 4  | G      | 12 | 1491.5570       | 746.2821        |
|         | 555.1447        | 278.0760        | 5  | S      | 11 | 1434.5355       | 717.7714        |
|         | 722.1430        | 361.5751        | 6  | S[167] | 10 | 1347.5035       | 674.2554        |
|         | 819.1958        | 410.1015        | 7  | P      | 9  | 1180.5051       | 590.7562        |
|         | 979.2264        | 490.1169        | 8  | C[160] | 8  | 1083.4524       | 542.2298        |
|         | 1142.2898       | 571.6485        | 9  | Y      | 7  | 923.4217        | 462.2145        |
|         | 1256.3327       | 628.6700        | 10 | N      | 6  | 760.3584        | 380.6828        |
|         | 1371.3596       | 686.1835        | 11 | D      | 5  | 646.3155        | 323.6614        |
|         | 1486.3866       | 743.6969        | 12 | D      | 4  | 531.2885        | 266.1479        |
|         | 1614.4451       | 807.7262        | 13 | Q      | 3  | 416.2616        | 208.6344        |
|         | 1727.5292       | 864.2682        | 14 | I      | 2  | 288.2030        | 144.6051        |
|         |                 |                 | 15 | R      | 1  | 175.1190        | 88.0631         |



# Annotated spectra from Saleem et. al. 2009

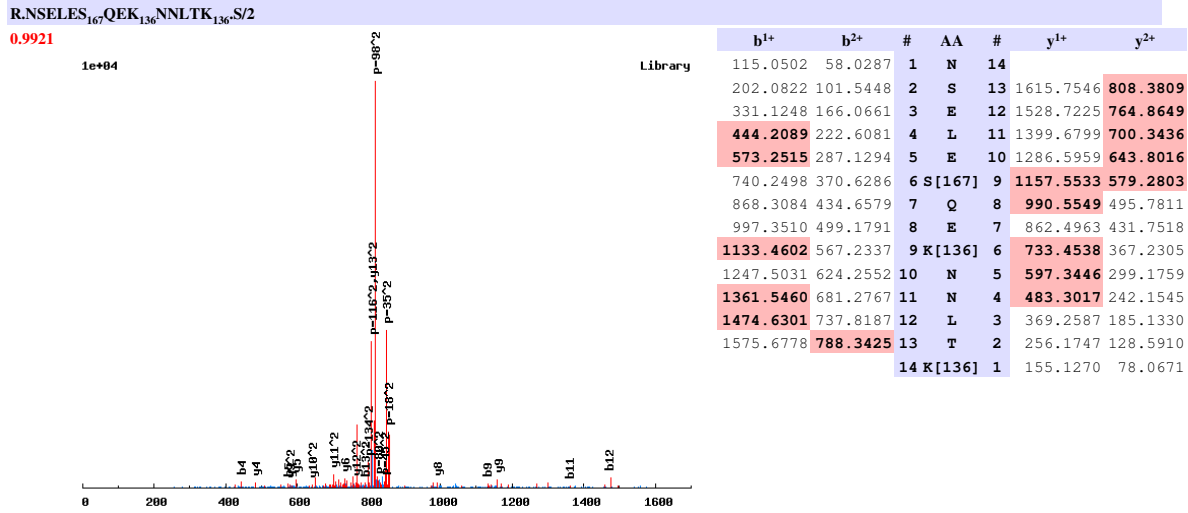

# Annotated spectra from Saleem et. al. 2009

R.NS<sub>167</sub>GATIVVER.I/2

0.7371

1e+04

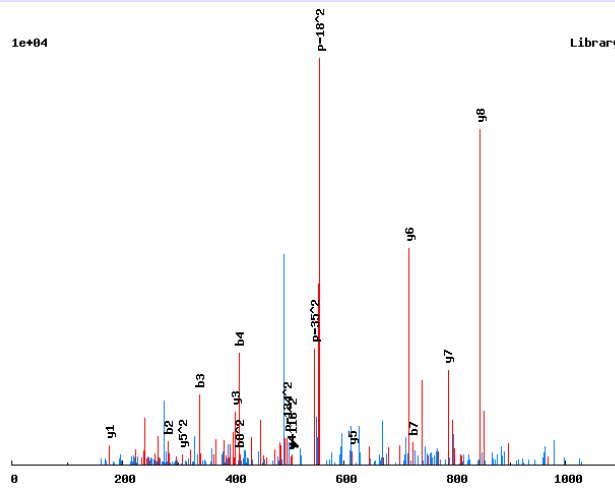

| Library | b <sup>1+</sup> | b <sup>2+</sup> | #  | AA     | #  | y <sup>1+</sup> | y <sup>2+</sup> |
|---------|-----------------|-----------------|----|--------|----|-----------------|-----------------|
|         | 115.0502        | 58.0287         | 1  | N      | 10 |                 |                 |
|         | 282.0486        | 141.5279        | 2  | S[167] | 9  | 1011.4870       | 506.2472        |
|         | 339.0700        | 170.0387        | 3  | G      | 8  | 844.4887        | 422.7480        |
|         | 410.1071        | 205.5572        | 4  | A      | 7  | 787.4672        | 394.2372        |
|         | 511.1548        | 256.0811        | 5  | T      | 6  | 716.4301        | 358.7187        |
|         | 624.2389        | 312.6231        | 6  | I      | 5  | 615.3824        | 308.1949        |
|         | 723.3073        | 362.1573        | 7  | V      | 4  | 502.2984        | 251.6528        |
|         | 822.3757        | 411.6915        | 8  | V      | 3  | 403.2299        | 202.1186        |
|         | 951.4183        | 476.2128        | 9  | E      | 2  | 304.1615        | 152.5844        |
|         |                 |                 | 10 | R      | 1  | 175.1190        | 88.0631         |

# Annotated spectra from Saleem et. al. 2009

R.NSIS<sub>167</sub>QHDLNSVTTT<sub>181</sub>PVPAGM<sub>147</sub>PPQK.D/3

0.9328

1e+04

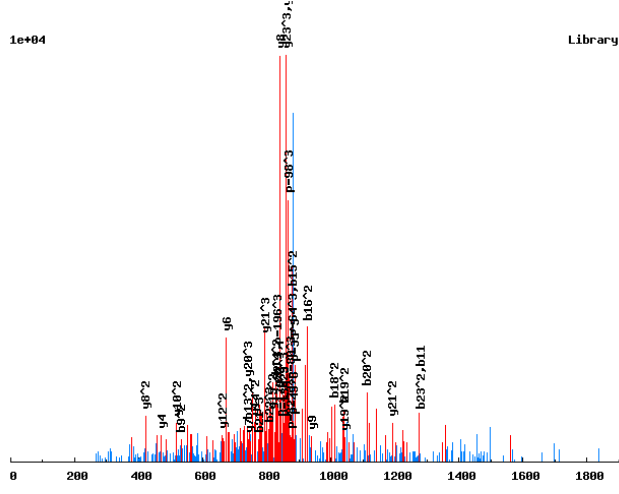

| Library | b <sup>1+</sup> | b <sup>2+</sup> | b <sup>3+</sup> | #  | AA     | #  | y <sup>1+</sup> | y <sup>2+</sup> | y <sup>3+</sup> |
|---------|-----------------|-----------------|-----------------|----|--------|----|-----------------|-----------------|-----------------|
|         | 115.0502        | 58.0287         | 39.0216         | 1  | N      | 24 |                 |                 |                 |
|         | 202.0822        | 101.5448        | 68.0323         | 2  | S      | 23 | 2581.1405       | 1291.0739       | 861.0517        |
|         | 315.1663        | 158.0868        | 105.7270        | 3  | I      | 22 | 2494.1085       | 1247.5579       | 832.0410        |
|         | 482.1647        | 241.5860        | 161.3931        | 4  | S[167] | 21 | 2381.0244       | 1191.0158       | 794.3463        |
|         | 610.2232        | 305.6153        | 204.0793        | 5  | Q      | 20 | 2214.0260       | 1107.5167       | 738.6802        |
|         | 747.2822        | 374.1447        | 249.7656        | 6  | H      | 19 | 2085.9675       | 1043.4874       | 695.9940        |
|         | 862.3091        | 431.6582        | 288.1079        | 7  | D      | 18 | 1948.9085       | 974.9579        | 650.3077        |
|         | 975.3932        | 488.2002        | 325.8026        | 8  | L      | 17 | 1833.8816       | 917.4444        | 611.9654        |
|         | 1062.4252       | 531.7162        | 354.8132        | 9  | S      | 16 | 1720.7975       | 860.9024        | 574.2707        |
|         | 1176.4681       | 588.7377        | 392.8276        | 10 | N      | 15 | 1633.7655       | 817.3864        | 545.2600        |
|         | 1275.5365       | 638.2719        | 425.8504        | 11 | V      | 14 | 1519.7226       | 760.3649        | 507.2457        |
|         | 1376.5842       | 688.7957        | 459.5329        | 12 | T      | 13 | 1420.6542       | 710.8307        | 474.2229        |
|         | 1477.6319       | 739.3196        | 493.2155        | 13 | T      | 12 | 1319.6065       | 660.3069        | 440.5404        |
|         | 1658.6459       | 829.8266        | 553.5535        | 14 | T[181] | 11 | 1218.5588       | 609.7830        | 406.8578        |
|         | 1755.6987       | 878.3530        | 585.9044        | 15 | P      | 10 | 1037.5448       | 519.2760        | 346.5198        |
|         | 1854.7671       | 927.8872        | 618.9272        | 16 | V      | 9  | 940.4920        | 470.7497        | 314.1689        |
|         | 1951.8198       | 976.4136        | 651.2781        | 17 | P      | 8  | 841.4236        | 421.2155        | 281.1461        |
|         | 2022.8569       | 1011.9321       | 674.9572        | 18 | A      | 7  | 744.3709        | 372.6891        | 248.7951        |
|         | 2079.8784       | 1040.4428       | 693.9643        | 19 | G      | 6  | 673.3338        | 337.1705        | 225.1161        |
|         | 2226.9138       | 1113.9605       | 742.9761        | 20 | M[147] | 5  | 616.3123        | 308.6598        | 206.1090        |
|         | 2323.9666       | 1162.4869       | 775.3270        | 21 | P      | 4  | 469.2769        | 235.1421        | 157.0972        |
|         | 2421.0193       | 1211.0133       | 807.6780        | 22 | P      | 3  | 372.2241        | 186.6157        | 124.7462        |
|         | 2549.0779       | 1275.0426       | 850.3642        | 23 | Q      | 2  | 275.1714        | 138.0893        | 92.3953         |
|         |                 |                 |                 | 24 | K      | 1  | 147.1128        | 74.0600         | 49.7091         |

# Annotated spectra from Saleem et. al. 2009

R.NSITGS<sub>167</sub>LR<sub>166</sub>S<sub>167</sub>IDMR<sub>166</sub>E/2

0.8906

1e+04

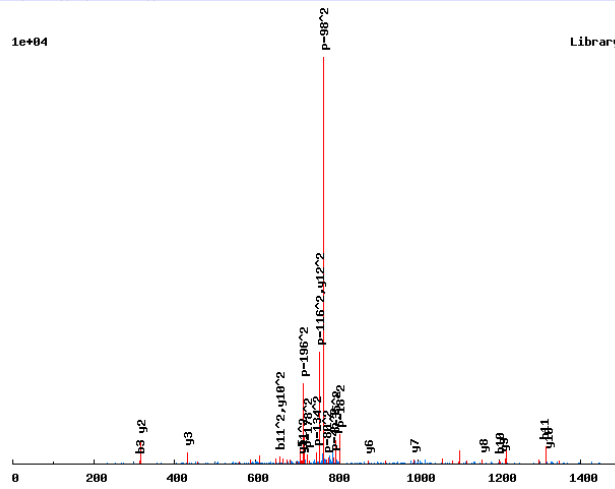

| Library | b <sup>1+</sup> | b <sup>2+</sup> | #  | AA     | #  | y <sup>1+</sup> | y <sup>2+</sup> |
|---------|-----------------|-----------------|----|--------|----|-----------------|-----------------|
|         | 115.0502        | 58.0287         | 1  | N      | 13 |                 |                 |
|         | 202.0822        | 101.5448        | 2  | S      | 12 | 1515.6541       | 758.3307        |
|         | 315.1663        | 158.0868        | 3  | I      | 11 | 1428.6221       | 714.8147        |
|         | 416.2140        | 208.6106        | 4  | T      | 10 | 1315.5380       | 658.2726        |
|         | 473.2354        | 237.1214        | 5  | G      | 9  | 1214.4903       | 607.7488        |
|         | 640.2338        | 320.6205        | 6  | S[167] | 8  | 1157.4689       | 579.2381        |
|         | 753.3179        | 377.1626        | 7  | L      | 7  | 990.4705        | 495.7389        |
|         | 919.4272        | 460.2173        | 8  | R[166] | 6  | 877.3864        | 439.1969        |
|         | 1086.4256       | 543.7164        | 9  | S[167] | 5  | 711.2771        | 356.1422        |
|         | 1199.5097       | 600.2585        | 10 | I      | 4  | 544.2787        | 272.6430        |
|         | 1314.5366       | 657.7719        | 11 | D      | 3  | 431.1946        | 216.1010        |
|         | 1445.5771       | 723.2922        | 12 | M      | 2  | 316.1677        | 158.5875        |
|         |                 |                 | 13 | R[166] | 1  | 185.1272        | 93.0672         |



# Annotated spectra from Saleem et. al. 2009

R.NS<sub>167</sub>-LNHSNS<sub>167</sub>-T<sub>181</sub>-LNVGPSR<sub>166</sub>-Q/2

0.9692

1e+04

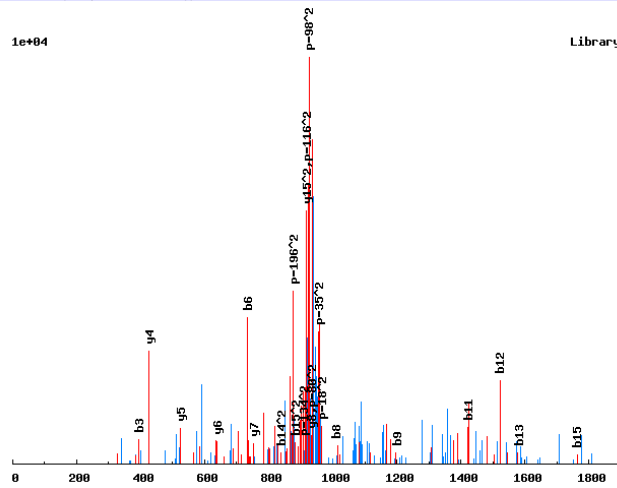

| Library | b <sup>1+</sup> | b <sup>2+</sup> | #  | AA     | #  | y <sup>1+</sup> | y <sup>2+</sup> |
|---------|-----------------|-----------------|----|--------|----|-----------------|-----------------|
|         | 115.0502        | 58.0287         | 1  | N      | 16 |                 |                 |
|         | 282.0486        | 141.5279        | 2  | S[167] | 15 | 1832.7005       | 916.8539        |
|         | 395.1326        | 198.0700        | 3  | L      | 14 | 1665.7021       | 833.3547        |
|         | 509.1756        | 255.0914        | 4  | N      | 13 | 1552.6180       | 776.8127        |
|         | 646.2345        | 323.6209        | 5  | H      | 12 | 1438.5751       | 719.7912        |
|         | 733.2665        | 367.1369        | 6  | S      | 11 | 1301.5162       | 651.2617        |
|         | 847.3094        | 424.1584        | 7  | N      | 10 | 1214.4842       | 607.7457        |
|         | 1014.3078       | 507.6575        | 8  | S[167] | 9  | 1100.4412       | 550.7243        |
|         | 1195.3218       | 598.1645        | 9  | T[181] | 8  | 933.4429        | 467.2251        |
|         | 1308.4059       | 654.7066        | 10 | L      | 7  | 752.4289        | 376.7181        |
|         | 1422.4488       | 711.7280        | 11 | N      | 6  | 639.3448        | 320.1760        |
|         | 1521.5172       | 761.2622        | 12 | V      | 5  | 525.3019        | 263.1546        |
|         | 1578.5387       | 789.7730        | 13 | G      | 4  | 426.2335        | 213.6204        |
|         | 1675.5914       | 838.2994        | 14 | P      | 3  | 369.2120        | 185.1096        |
|         | 1762.6235       | 881.8154        | 15 | S      | 2  | 272.1592        | 136.5833        |
|         |                 |                 | 16 | R[166] | 1  | 185.1272        | 93.0672         |

# Annotated spectra from Saleem et. al. 2009

R.NS<sub>167</sub>LNHS<sub>167</sub>NSTLNVGPSR<sub>166</sub>Q/3

0.9817

1e+04

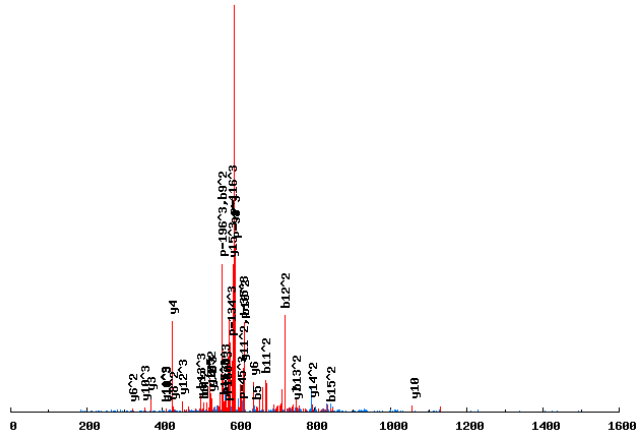

| Library | b <sup>1+</sup> | b <sup>2+</sup> | b <sup>3+</sup> | #  | AA     | #  | y <sup>1+</sup> | y <sup>2+</sup> | y <sup>3+</sup> |
|---------|-----------------|-----------------|-----------------|----|--------|----|-----------------|-----------------|-----------------|
|         | 115.0502        | 58.0287         | 39.0216         | 1  | N      | 16 |                 |                 |                 |
|         | 282.0486        | 141.5279        | 94.6877         | 2  | S[167] | 15 | 1752.7341       | 876.8707        | 584.9162        |
|         | 395.1326        | 198.0700        | 132.3824        | 3  | L      | 14 | 1585.7358       | 793.3715        | 529.2501        |
|         | 509.1756        | 255.0914        | 170.3967        | 4  | N      | 13 | 1472.6517       | 736.8295        | 491.5554        |
|         | 646.2345        | 323.6209        | 216.0830        | 5  | H      | 12 | 1358.6088       | 679.8080        | 453.5411        |
|         | 813.2328        | 407.1201        | 271.7491        | 6  | S[167] | 11 | 1221.5499       | 611.2786        | 407.8548        |
|         | 927.2758        | 464.1415        | 309.7634        | 7  | N      | 10 | 1054.5515       | 527.7794        | 352.1887        |
|         | 1014.3078       | 507.6575        | 338.7741        | 8  | S      | 9  | 940.5086        | 470.7579        | 314.1744        |
|         | 1115.3555       | 558.1814        | 372.4567        | 9  | T      | 8  | 853.4765        | 427.2419        | 285.1637        |
|         | 1228.4395       | 614.7234        | 410.1514        | 10 | L      | 7  | 752.4289        | 376.7181        | 251.4811        |
|         | 1342.4825       | 671.7449        | 448.1657        | 11 | N      | 6  | 639.3448        | 320.1760        | 213.7865        |
|         | 1441.5509       | 721.2791        | 481.1885        | 12 | V      | 5  | 525.3019        | 263.1546        | 175.7721        |
|         | 1498.5723       | 749.7898        | 500.1956        | 13 | G      | 4  | 426.2335        | 213.6204        | 142.7493        |
|         | 1595.6251       | 798.3162        | 532.5466        | 14 | P      | 3  | 369.2120        | 185.1096        | 123.7422        |
|         | 1682.6571       | 841.8322        | 561.5572        | 15 | S      | 2  | 272.1592        | 136.5833        | 91.3913         |
|         |                 |                 |                 | 16 | R[166] | 1  | 185.1272        | 93.0672         | 62.3806         |

# Annotated spectra from Saleem et. al. 2009

K.NS<sub>167</sub>LTNTSILSR.A/2

0.9977

1e+04

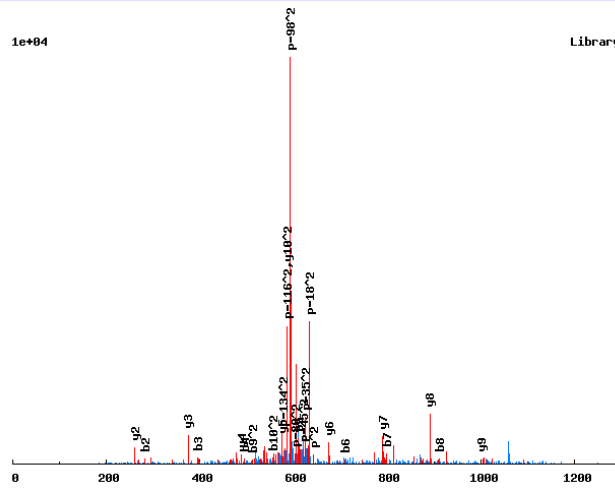

| Library | b <sup>1+</sup> | b <sup>2+</sup> | #  | AA     | #  | y <sup>1+</sup> | y <sup>2+</sup> |
|---------|-----------------|-----------------|----|--------|----|-----------------|-----------------|
|         | 115.0502        | 58.0287         | 1  | N      | 11 |                 |                 |
|         | <b>282.0486</b> | 141.5279        | 2  | S[167] | 10 | 1171.5718       | <b>586.2896</b> |
|         | 395.1326        | 198.0700        | 3  | L      | 9  | 1004.5735       | 502.7904        |
|         | 496.1803        | 248.5938        | 4  | T      | 8  | 891.4894        | 446.2484        |
|         | 610.2232        | 305.6153        | 5  | N      | 7  | 790.4417        | 395.7245        |
|         | 711.2709        | 356.1391        | 6  | T      | 6  | 676.3988        | 338.7030        |
|         | 798.3030        | 399.6551        | 7  | S      | 5  | 575.3511        | 288.1792        |
|         | 911.3870        | 456.1971        | 8  | I      | 4  | 488.3191        | 244.6632        |
|         | 1024.4711       | <b>512.7392</b> | 9  | L      | 3  | 375.2350        | 188.1212        |
|         | 1111.5031       | <b>556.2552</b> | 10 | S      | 2  | <b>262.1510</b> | 131.5791        |
|         |                 |                 | 11 | R      | 1  | 175.1190        | 88.0631         |



# Annotated spectra from Saleem et. al. 2009

K.NS<sub>167</sub>LTNTSILS<sub>167</sub>R.A/2

0.968

1e+04

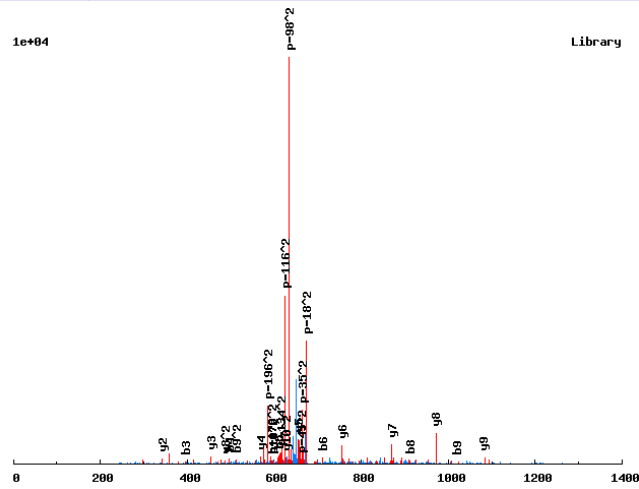

| Library | b <sup>1+</sup> | b <sup>2+</sup> | #  | AA      | #  | y <sup>1+</sup> | y <sup>2+</sup> |
|---------|-----------------|-----------------|----|---------|----|-----------------|-----------------|
|         | 115.0502        | 58.0287         | 1  | N       | 11 |                 |                 |
|         | 282.0486        | 141.5279        | 2  | S [167] | 10 | 1251.5382       | 626.2727        |
|         | 395.1326        | 198.0700        | 3  | L       | 9  | 1084.5398       | 542.7735        |
|         | 496.1803        | 248.5938        | 4  | T       | 8  | 971.4558        | 486.2315        |
|         | 610.2232        | 305.6153        | 5  | N       | 7  | 870.4081        | 435.7077        |
|         | 711.2709        | 356.1391        | 6  | T       | 6  | 756.3651        | 378.6862        |
|         | 798.3030        | 399.6551        | 7  | S       | 5  | 655.3175        | 328.1624        |
|         | 911.3870        | 456.1971        | 8  | I       | 4  | 568.2854        | 284.6464        |
|         | 1024.4711       | 512.7392        | 9  | L       | 3  | 455.2014        | 228.1043        |
|         | 1191.4694       | 596.2384        | 10 | S [167] | 2  | 342.1173        | 171.5623        |
|         |                 |                 | 11 | R       | 1  | 175.1190        | 88.0631         |

# Annotated spectra from Saleem et. al. 2009

K.NS<sub>167</sub>LTNTS<sub>167</sub>ILS<sub>167</sub>R<sub>166</sub>A/2

0.8232

1e+04

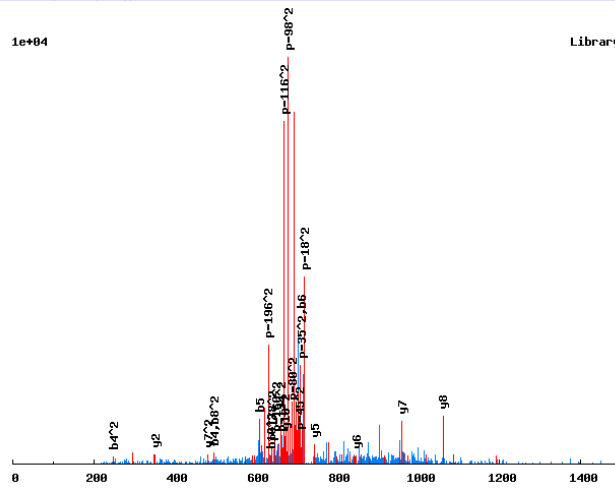

| Library | b <sup>1+</sup> | b <sup>2+</sup> | #  | AA     | #  | y <sup>1+</sup> | y <sup>2+</sup> |
|---------|-----------------|-----------------|----|--------|----|-----------------|-----------------|
|         | 115.0502        | 58.0287         | 1  | N      | 11 |                 |                 |
|         | 282.0486        | 141.5279        | 2  | S[167] | 10 | 1341.5128       | 671.2600        |
|         | 395.1326        | 198.0700        | 3  | L      | 9  | 1174.5144       | 587.7608        |
|         | 496.1803        | 248.5938        | 4  | T      | 8  | 1061.4304       | 531.2188        |
|         | 610.2232        | 305.6153        | 5  | N      | 7  | 960.3827        | 480.6950        |
|         | 711.2709        | 356.1391        | 6  | T      | 6  | 846.3397        | 423.6735        |
|         | 878.2693        | 439.6383        | 7  | S[167] | 5  | 745.2921        | 373.1497        |
|         | 991.3533        | 496.1803        | 8  | I      | 4  | 578.2937        | 289.6505        |
|         | 1104.4374       | 552.7223        | 9  | L      | 3  | 465.2096        | 233.1085        |
|         | 1271.4358       | 636.2215        | 10 | S[167] | 2  | 352.1256        | 176.5664        |
|         |                 |                 | 11 | R[166] | 1  | 185.1272        | 93.0672         |

# Annotated spectra from Saleem et. al. 2009

R.NSNIS<sub>167</sub>PST<sub>181</sub>PSAVLNDR.Q/2

0.9925

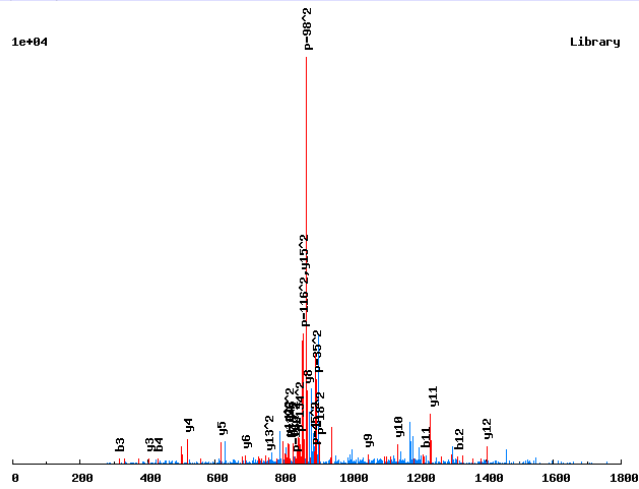

| Library | b <sup>1+</sup> | b <sup>2+</sup> | #  | AA     | #  | y <sup>1+</sup> | y <sup>2+</sup> |
|---------|-----------------|-----------------|----|--------|----|-----------------|-----------------|
|         | 115.0502        | 58.0287         | 1  | N      | 16 |                 |                 |
|         | 202.0822        | 101.5448        | 2  | S      | 15 | 1717.7194       | 859.3633        |
|         | 316.1252        | 158.5662        | 3  | N      | 14 | 1630.6873       | 815.8473        |
|         | 429.2092        | 215.1083        | 4  | I      | 13 | 1516.6444       | 758.8258        |
|         | 596.2076        | 298.6074        | 5  | S[167] | 12 | 1403.5604       | 702.2838        |
|         | 693.2604        | 347.1338        | 6  | P      | 11 | 1236.5620       | 618.7846        |
|         | 780.2924        | 390.6498        | 7  | S      | 10 | 1139.5092       | 570.2583        |
|         | 961.3064        | 481.1568        | 8  | T[181] | 9  | 1052.4772       | 526.7422        |
|         | 1058.3592       | 529.6832        | 9  | P      | 8  | 871.4632        | 436.2352        |
|         | 1145.3912       | 573.1992        | 10 | S      | 7  | 774.4104        | 387.7089        |
|         | 1216.4283       | 608.7178        | 11 | A      | 6  | 687.3784        | 344.1928        |
|         | 1315.4967       | 658.2520        | 12 | V      | 5  | 616.3413        | 308.6743        |
|         | 1428.5808       | 714.7940        | 13 | L      | 4  | 517.2729        | 259.1401        |
|         | 1542.6237       | 771.8155        | 14 | N      | 3  | 404.1888        | 202.5980        |
|         | 1657.6506       | 829.3290        | 15 | D      | 2  | 290.1459        | 145.5766        |
|         |                 |                 | 16 | R      | 1  | 175.1190        | 88.0631         |

# Annotated spectra from Saleem et. al. 2009

K.NS<sub>167</sub>NNSFLNS<sub>167</sub>VPHS<sub>167</sub>VTR.M/2

0.9123

1e+04

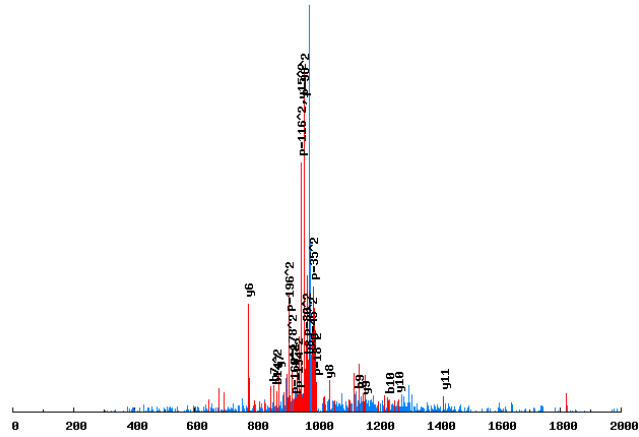

| Library | b <sup>1+</sup> | b <sup>2+</sup> | #  | AA     | #  | y <sup>1+</sup> | y <sup>2+</sup> |
|---------|-----------------|-----------------|----|--------|----|-----------------|-----------------|
|         | 115.0502        | 58.0287         | 1  | N      | 16 |                 |                 |
|         | 282.0486        | 141.5279        | 2  | S[167] | 15 | 1898.7235       | 949.8654        |
|         | 396.0915        | 198.5494        | 3  | N      | 14 | 1731.7251       | 866.3662        |
|         | 510.1344        | 255.5709        | 4  | N      | 13 | 1617.6822       | 809.3447        |
|         | 597.1665        | 299.0869        | 5  | S      | 12 | 1503.6393       | 752.3233        |
|         | 744.2349        | 372.6211        | 6  | F      | 11 | 1416.6072       | 708.8073        |
|         | 857.3189        | 429.1631        | 7  | L      | 10 | 1269.5388       | 635.2731        |
|         | 971.3619        | 486.1846        | 8  | N      | 9  | 1156.4548       | 578.7310        |
|         | 1138.3602       | 569.6838        | 9  | S[167] | 8  | 1042.4118       | 521.7096        |
|         | 1237.4286       | 619.2180        | 10 | V      | 7  | 875.4135        | 438.2104        |
|         | 1334.4814       | 667.7443        | 11 | P      | 6  | 776.3451        | 388.6762        |
|         | 1471.5403       | 736.2738        | 12 | H      | 5  | 679.2923        | 340.1498        |
|         | 1638.5387       | 819.7730        | 13 | S[167] | 4  | 542.2334        | 271.6203        |
|         | 1737.6071       | 869.3072        | 14 | V      | 3  | 375.2350        | 188.1212        |
|         | 1838.6548       | 919.8310        | 15 | T      | 2  | 276.1666        | 138.5870        |
|         |                 |                 | 16 | R      | 1  | 175.1190        | 88.0631         |

# Annotated spectra from Saleem et. al. 2009

K.NSNNFLNS<sub>167</sub>VPHS<sub>167</sub>VTR.M/3

0.9966

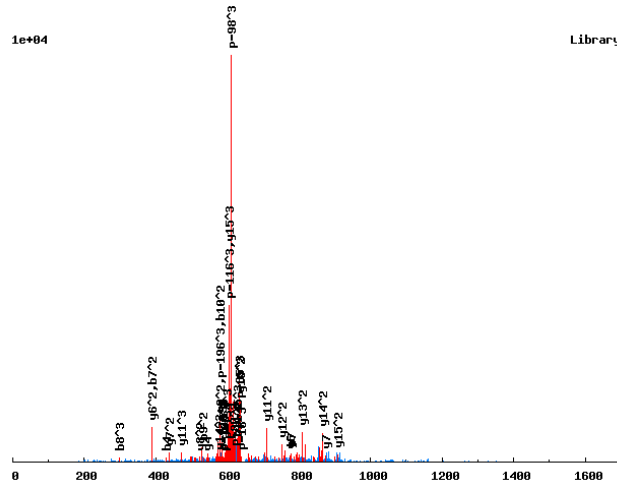

| Library | b <sup>1+</sup> | b <sup>2+</sup> | b <sup>3+</sup> | #  | AA     | #  | y <sup>1+</sup> | y <sup>2+</sup> | y <sup>3+</sup> |
|---------|-----------------|-----------------|-----------------|----|--------|----|-----------------|-----------------|-----------------|
|         | 115.0502        | 58.0287         | 39.0216         | 1  | N      | 16 |                 |                 |                 |
|         | 202.0822        | 101.5448        | 68.0323         | 2  | S      | 15 | 1818.7572       | 909.8822        | 606.9239        |
|         | 316.1252        | 158.5662        | 106.0466        | 3  | N      | 14 | 1731.7251       | 866.3662        | 577.9132        |
|         | 430.1681        | 215.5877        | 144.0609        | 4  | N      | 13 | 1617.6822       | 809.3447        | 539.8989        |
|         | 517.2001        | 259.1037        | 173.0716        | 5  | S      | 12 | 1503.6393       | 752.3233        | 501.8846        |
|         | 664.2685        | 332.6379        | 222.0944        | 6  | F      | 11 | 1416.6072       | 708.8073        | 472.8739        |
|         | 777.3526        | 389.1799        | 259.7891        | 7  | L      | 10 | 1269.5388       | 635.2731        | 423.8511        |
|         | 891.3955        | 446.2014        | 297.8034        | 8  | N      | 9  | 1156.4548       | 578.7310        | 386.1564        |
|         | 1058.3939       | 529.7006        | 353.4695        | 9  | S[167] | 8  | 1042.4118       | 521.7096        | 348.1421        |
|         | 1157.4623       | 579.2348        | 386.4923        | 10 | V      | 7  | 875.4135        | 438.2104        | 292.4760        |
|         | 1254.5151       | 627.7612        | 418.8432        | 11 | P      | 6  | 776.3451        | 388.6762        | 259.4532        |
|         | 1391.5740       | 696.2906        | 464.5295        | 12 | H      | 5  | 679.2923        | 340.1498        | 227.1023        |
|         | 1558.5723       | 779.7898        | 520.1956        | 13 | S[167] | 4  | 542.2334        | 271.6203        | 181.4160        |
|         | 1657.6407       | 829.3240        | 553.2184        | 14 | V      | 3  | 375.2350        | 188.1212        | 125.7499        |
|         | 1758.6884       | 879.8479        | 586.9010        | 15 | T      | 2  | 276.1666        | 138.5870        | 92.7271         |
|         |                 |                 |                 | 16 | R      | 1  | 175.1190        | 88.0631         | 59.0445         |





# Annotated spectra from Saleem et. al. 2009

K.NS<sub>167</sub>S<sub>167</sub>GS<sub>167</sub>S<sub>167</sub>MK.T/3

0.8235

1e+04

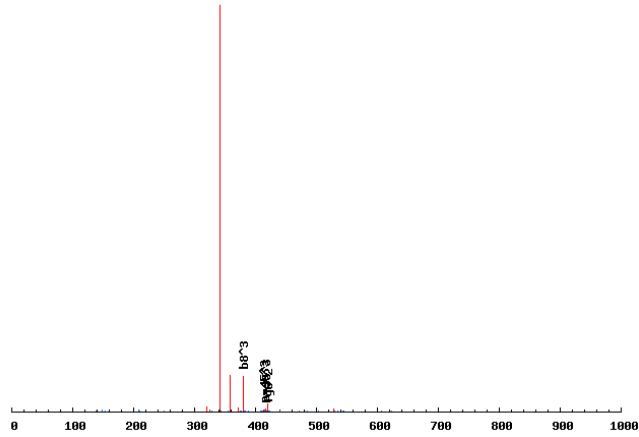

| Library | b <sup>1+</sup> | b <sup>2+</sup> | b <sup>3+</sup> | # | AA      | # | y <sup>1+</sup> | y <sup>2+</sup> | y <sup>3+</sup> |
|---------|-----------------|-----------------|-----------------|---|---------|---|-----------------|-----------------|-----------------|
|         | 115.0502        | 58.0287         | 39.0216         | 1 | N       | 9 |                 |                 |                 |
|         | 282.0486        | 141.5279        | 94.6877         | 2 | S [167] | 8 | 1170.1666       | 585.5869        | 390.7270        |
|         | 449.0469        | 225.0271        | 150.3538        | 3 | S [167] | 7 | 1003.1682       | 502.0877        | 335.0609        |
|         | 506.0684        | 253.5378        | 169.3610        | 4 | G       | 6 | 836.1698        | 418.5886        | 279.3948        |
|         | 673.0668        | 337.0370        | 225.0271        | 5 | S [167] | 5 | 779.1484        | 390.0778        | 260.3876        |
|         | 840.0651        | 420.5362        | 280.6932        | 6 | S [167] | 4 | 612.1500        | 306.5786        | 204.7215        |
|         | 1007.0635       | 504.0354        | 336.3593        | 7 | S [167] | 3 | 445.1517        | 223.0795        | 149.0554        |
|         | 1138.1040       | 569.5556        | 380.0395        | 8 | M       | 2 | 278.1533        | 139.5803        | 93.3893         |
|         |                 |                 |                 | 9 | K       | 1 | 147.1128        | 74.0600         | 49.7091         |



# Annotated spectra from Saleem et. al. 2009

K.NSSH<sub>167</sub>LS<sub>167</sub>ETDLNQSK.G/3

0.9964

1e+04

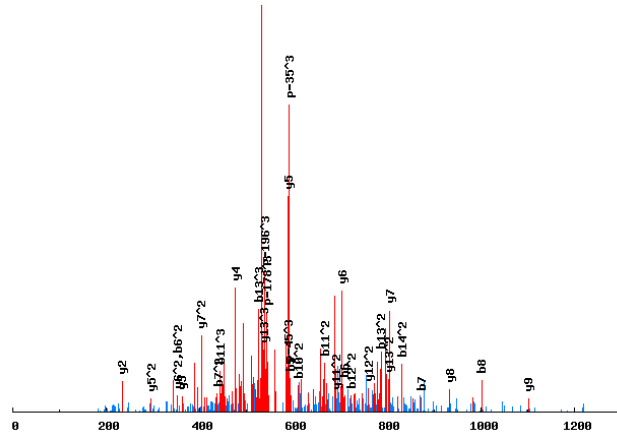

| Library | b <sup>1+</sup>  | b <sup>2+</sup> | b <sup>3+</sup> | #  | AA     | #  | y <sup>1+</sup>  | y <sup>2+</sup> | y <sup>3+</sup> |
|---------|------------------|-----------------|-----------------|----|--------|----|------------------|-----------------|-----------------|
|         | 115.0502         | 58.0287         | 39.0216         | 1  | N      | 15 |                  |                 |                 |
|         | 202.0822         | 101.5448        | 68.0323         | 2  | S      | 14 | 1692.6514        | 846.8293        | 564.8886        |
|         | 289.1143         | 145.0608        | 97.0429         | 3  | S      | 13 | 1605.6193        | <b>803.3133</b> | <b>535.8780</b> |
|         | 426.1732         | 213.5902        | 142.7292        | 4  | H      | 12 | 1518.5873        | <b>759.7973</b> | 506.8673        |
|         | <b>593.1715</b>  | 297.0894        | 198.3954        | 5  | S[167] | 11 | 1381.5284        | <b>691.2678</b> | 461.1810        |
|         | <b>706.2556</b>  | <b>353.6314</b> | 236.0901        | 6  | L      | 10 | 1214.5300        | 607.7687        | 405.5149        |
|         | <b>873.2540</b>  | <b>437.1306</b> | 291.7562        | 7  | S[167] | 9  | <b>1101.4460</b> | 551.2266        | 367.8202        |
|         | <b>1002.2966</b> | 501.6519        | 334.7704        | 8  | E      | 8  | <b>934.4476</b>  | 467.7274        | 312.1541        |
|         | 1103.3442        | 552.1758        | 368.4529        | 9  | T      | 7  | <b>805.4050</b>  | <b>403.2062</b> | 269.1399        |
|         | 1218.3712        | <b>609.6892</b> | 406.7952        | 10 | D      | 6  | <b>704.3573</b>  | <b>352.6823</b> | 235.4573        |
|         | 1331.4552        | <b>666.2313</b> | <b>444.4899</b> | 11 | L      | 5  | <b>589.3304</b>  | <b>295.1688</b> | 197.1150        |
|         | 1445.4982        | <b>723.2527</b> | 482.5042        | 12 | N      | 4  | <b>476.2463</b>  | 238.6268        | 159.4203        |
|         | 1573.5567        | <b>787.2820</b> | <b>525.1904</b> | 13 | Q      | 3  | <b>362.2034</b>  | 181.6053        | 121.4060        |
|         | 1660.5888        | <b>830.7980</b> | 554.2011        | 14 | S      | 2  | <b>234.1448</b>  | 117.5761        | 78.7198         |
|         |                  |                 |                 | 15 | K      | 1  | 147.1128         | 74.0600         | 49.7091         |

# Annotated spectra from Saleem et. al. 2009

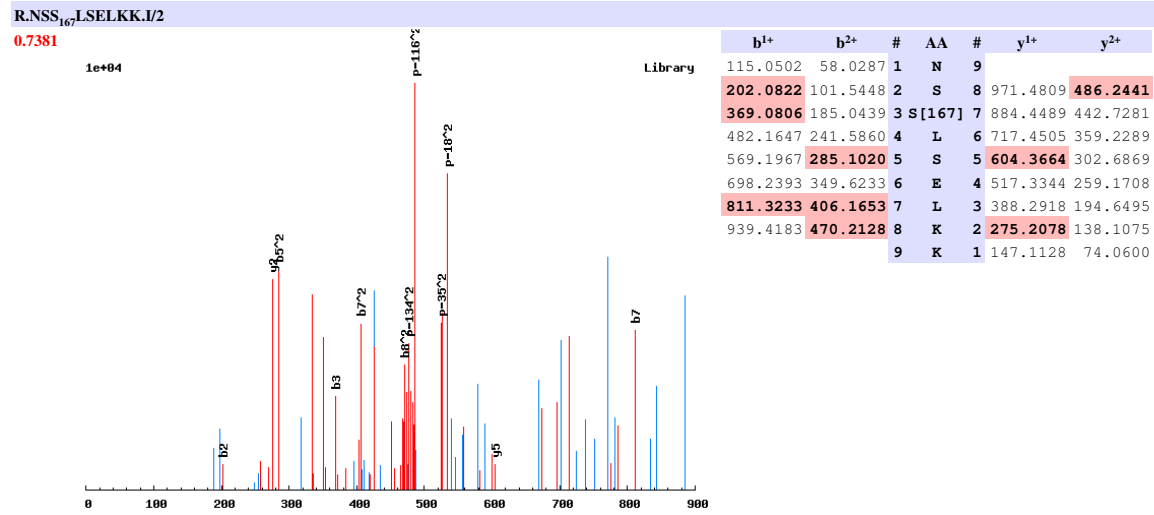

# Annotated spectra from Saleem et. al. 2009

K.NSS<sub>167</sub>NEFLTK.N/2

0.898

1e+04

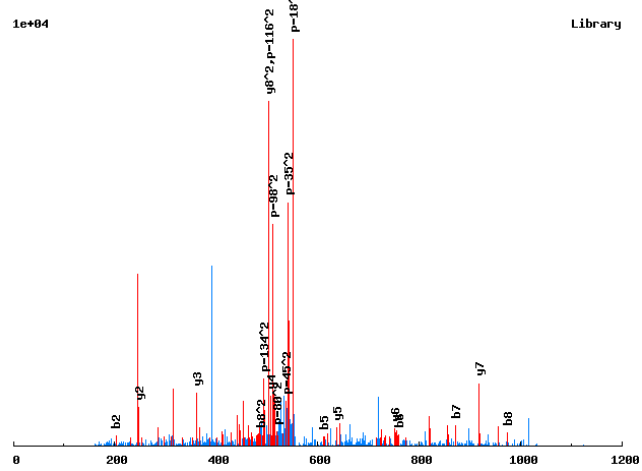

| Library | b <sup>1+</sup> | b <sup>2+</sup> | # | AA      | # | y <sup>1+</sup> | y <sup>2+</sup> |
|---------|-----------------|-----------------|---|---------|---|-----------------|-----------------|
|         | 115.0502        | 58.0287         | 1 | N       | 9 |                 |                 |
|         | <b>202.0822</b> | 101.5448        | 2 | S       | 8 | 1005.4289       | <b>503.2181</b> |
|         | 369.0806        | 185.0439        | 3 | S [167] | 7 | <b>918.3968</b> | 459.7021        |
|         | 483.1235        | 242.0654        | 4 | N       | 6 | <b>751.3985</b> | 376.2029        |
|         | <b>612.1661</b> | 306.5867        | 5 | E       | 5 | <b>637.3555</b> | 319.1814        |
|         | <b>759.2345</b> | 380.1209        | 6 | F       | 4 | <b>508.3130</b> | 254.6601        |
|         | <b>872.3186</b> | 436.6629        | 7 | L       | 3 | <b>361.2445</b> | 181.1259        |
|         | <b>973.3663</b> | <b>487.1868</b> | 8 | T       | 2 | <b>248.1605</b> | 124.5839        |
|         |                 |                 | 9 | K       | 1 | 147.1128        | 74.0600         |

# Annotated spectra from Saleem et. al. 2009

R.NS<sub>167</sub>SS<sub>167</sub>-LLNFQNSVLTSNK.D/2

0.9991

1e+04

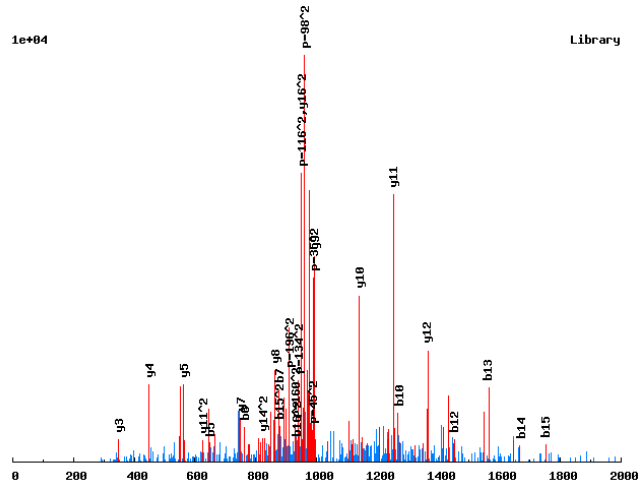

| Library | b <sup>1+</sup> | b <sup>2+</sup> | #  | AA     | #  | y <sup>1+</sup> | y <sup>2+</sup> |
|---------|-----------------|-----------------|----|--------|----|-----------------|-----------------|
|         | 115.0502        | 58.0287         | 1  | N      | 17 |                 |                 |
|         | 282.0486        | 141.5279        | 2  | S[167] | 16 | 1898.8297       | 949.9185        |
|         | 369.0806        | 185.0439        | 3  | S      | 15 | 1731.8313       | 866.4193        |
|         | 536.0790        | 268.5431        | 4  | S[167] | 14 | 1644.7993       | 822.9033        |
|         | 649.1630        | 325.0852        | 5  | L      | 13 | 1477.8009       | 739.4041        |
|         | 762.2471        | 381.6272        | 6  | L      | 12 | 1364.7168       | 682.8621        |
|         | 876.2900        | 438.6486        | 7  | N      | 11 | 1251.6328       | 626.3200        |
|         | 1023.3584       | 512.1829        | 8  | F      | 10 | 1137.5899       | 569.2986        |
|         | 1151.4170       | 576.2121        | 9  | Q      | 9  | 990.5215        | 495.7644        |
|         | 1265.4599       | 633.2336        | 10 | N      | 8  | 862.4629        | 431.7351        |
|         | 1352.4920       | 676.7496        | 11 | S      | 7  | 748.4199        | 374.7136        |
|         | 1451.5604       | 726.2838        | 12 | V      | 6  | 661.3879        | 331.1976        |
|         | 1564.6444       | 782.8259        | 13 | L      | 5  | 562.3195        | 281.6634        |
|         | 1665.6921       | 833.3497        | 14 | T      | 4  | 449.2354        | 225.1214        |
|         | 1752.7241       | 876.8657        | 15 | S      | 3  | 348.1878        | 174.5975        |
|         | 1866.7671       | 933.8872        | 16 | N      | 2  | 261.1557        | 131.0815        |
|         |                 |                 | 17 | K      | 1  | 147.1128        | 74.0600         |

# Annotated spectra from Saleem et. al. 2009

R.NSSS<sub>167</sub>S<sub>167</sub>FTYPQLPQLQK.E/2

0.7152

1e+04

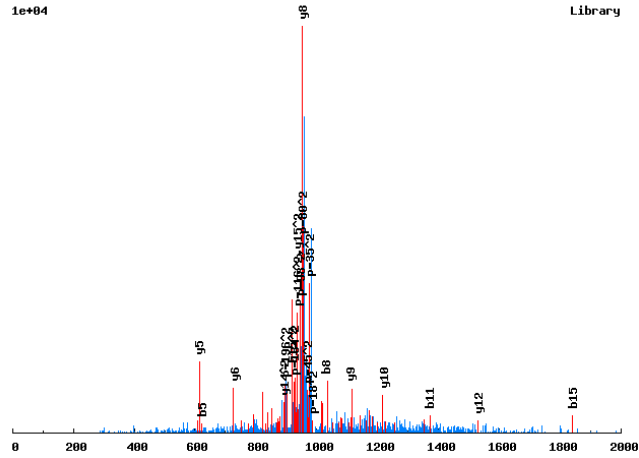

| Library | b <sup>1+</sup> | b <sup>2+</sup> | #  | AA     | #  | y <sup>1+</sup> | y <sup>2+</sup> |
|---------|-----------------|-----------------|----|--------|----|-----------------|-----------------|
|         | 115.0502        | 58.0287         | 1  | N      | 16 |                 |                 |
|         | 202.0822        | 101.5448        | 2  | S      | 15 | 1870.8024       | 935.9048        |
|         | 289.1143        | 145.0608        | 3  | S      | 14 | 1783.7704       | 892.3888        |
|         | 456.1126        | 228.5600        | 4  | S[167] | 13 | 1696.7383       | 848.8728        |
|         | 623.1110        | 312.0591        | 5  | S[167] | 12 | 1529.7400       | 765.3736        |
|         | 770.1794        | 385.5933        | 6  | F      | 11 | 1362.7416       | 681.8744        |
|         | 871.2271        | 436.1172        | 7  | T      | 10 | 1215.6732       | 608.3402        |
|         | 1034.2904       | 517.6488        | 8  | Y      | 9  | 1114.6255       | 557.8164        |
|         | 1131.3432       | 566.1752        | 9  | P      | 8  | 951.5622        | 476.2847        |
|         | 1259.4018       | 630.2045        | 10 | Q      | 7  | 854.5094        | 427.7584        |
|         | 1372.4858       | 686.7465        | 11 | L      | 6  | 726.4508        | 363.7291        |
|         | 1469.5386       | 735.2729        | 12 | P      | 5  | 613.3668        | 307.1870        |
|         | 1597.5972       | 799.3022        | 13 | Q      | 4  | 516.3140        | 258.6607        |
|         | 1710.6812       | 855.8442        | 14 | L      | 3  | 388.2554        | 194.6314        |
|         | 1838.7398       | 919.8735        | 15 | Q      | 2  | 275.1714        | 138.0893        |
|         |                 |                 | 16 | K      | 1  | 147.1128        | 74.0600         |

# Annotated spectra from Saleem et. al. 2009

R.NS<sub>167</sub>VNS<sub>167</sub>VVTPR<sub>166</sub>.T/2

0.9922

1e+04

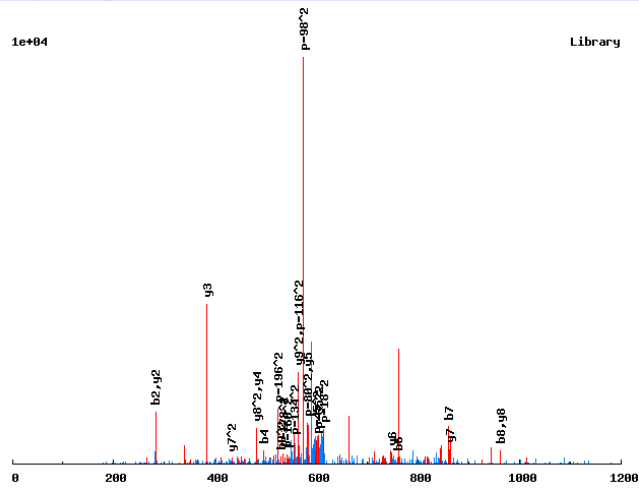

| Library | b <sup>1+</sup> | b <sup>2+</sup> | #  | AA     | #  | y <sup>1+</sup> | y <sup>2+</sup> |
|---------|-----------------|-----------------|----|--------|----|-----------------|-----------------|
|         | 115.0502        | 58.0287         | 1  | N      | 10 |                 |                 |
|         | <b>282.0486</b> | 141.5279        | 2  | S[167] | 9  | 1128.4725       | <b>564.7399</b> |
|         | 381.1170        | 191.0621        | 3  | V      | 8  | <b>961.4742</b> | <b>481.2407</b> |
|         | <b>495.1599</b> | 248.0836        | 4  | N      | 7  | <b>862.4058</b> | <b>431.7065</b> |
|         | 662.1583        | 331.5828        | 5  | S[167] | 6  | <b>748.3628</b> | 374.6851        |
|         | <b>761.2267</b> | 381.1170        | 6  | V      | 5  | <b>581.3645</b> | 291.1859        |
|         | <b>860.2951</b> | 430.6512        | 7  | V      | 4  | <b>482.2961</b> | 241.6517        |
|         | <b>961.3428</b> | 481.1750        | 8  | T      | 3  | <b>383.2277</b> | 192.1175        |
|         | 1058.3955       | <b>529.7014</b> | 9  | P      | 2  | <b>282.1800</b> | 141.5936        |
|         |                 |                 | 10 | R[166] | 1  | 185.1272        | 93.0672         |

# Annotated spectra from Saleem et. al. 2009

K.NS<sub>167</sub>VVDY<sub>243</sub>LAPVEYSVR<sub>166</sub>E/3

0.7844

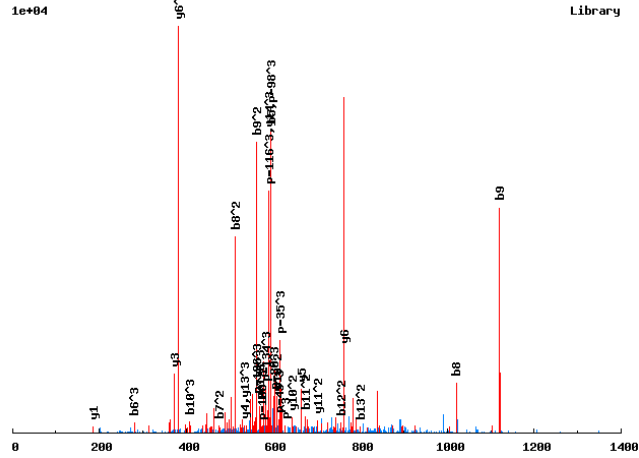

| Library | b <sup>1+</sup> | b <sup>2+</sup> | b <sup>3+</sup> | #  | AA     | #  | y <sup>1+</sup> | y <sup>2+</sup> | y <sup>3+</sup> |
|---------|-----------------|-----------------|-----------------|----|--------|----|-----------------|-----------------|-----------------|
|         | 115.0502        | 58.0287         | 39.0216         | 1  | N      | 15 |                 |                 |                 |
|         | 282.0486        | 141.5279        | 94.6877         | 2  | S[167] | 14 | 1766.7677       | 883.8875        | 589.5941        |
|         | 381.1170        | 191.0621        | 127.7105        | 3  | V      | 13 | 1599.7693       | 800.3883        | 533.9280        |
|         | 480.1854        | 240.5963        | 160.7333        | 4  | V      | 12 | 1500.7009       | 750.8541        | 500.9052        |
|         | 595.2123        | 298.1098        | 199.0756        | 5  | D      | 11 | 1401.6325       | 701.3199        | 467.8824        |
|         | 838.2420        | 419.6246        | 280.0855        | 6  | Y[243] | 10 | 1286.6056       | 643.8064        | 429.5400        |
|         | 951.3261        | 476.1667        | 317.7802        | 7  | L      | 9  | 1043.5759       | 522.2916        | 348.5302        |
|         | 1022.3632       | 511.6852        | 341.4592        | 8  | A      | 8  | 930.4919        | 465.7496        | 310.8355        |
|         | 1119.4159       | 560.2116        | 373.8102        | 9  | P      | 7  | 859.4547        | 430.2310        | 287.1564        |
|         | 1218.4843       | 609.7458        | 406.8330        | 10 | V      | 6  | 762.4020        | 381.7046        | 254.8055        |
|         | 1347.5269       | 674.2671        | 449.8472        | 11 | E      | 5  | 663.3336        | 332.1704        | 221.7827        |
|         | 1510.5903       | 755.7988        | 504.2016        | 12 | Y      | 4  | 534.2910        | 267.6491        | 178.7685        |
|         | 1597.6223       | 799.3148        | 533.2123        | 13 | S      | 3  | 371.2277        | 186.1175        | 124.4141        |
|         | 1696.6907       | 848.8490        | 566.2351        | 14 | V      | 2  | 284.1956        | 142.6015        | 95.4034         |
|         |                 |                 |                 | 15 | R[166] | 1  | 185.1272        | 93.0672         | 62.3806         |





# Annotated spectra from Saleem et. al. 2009

K.NTQS<sub>167</sub>PQT<sub>181</sub>PLVEPVT<sub>166</sub>T/2

0.9987

1e+04

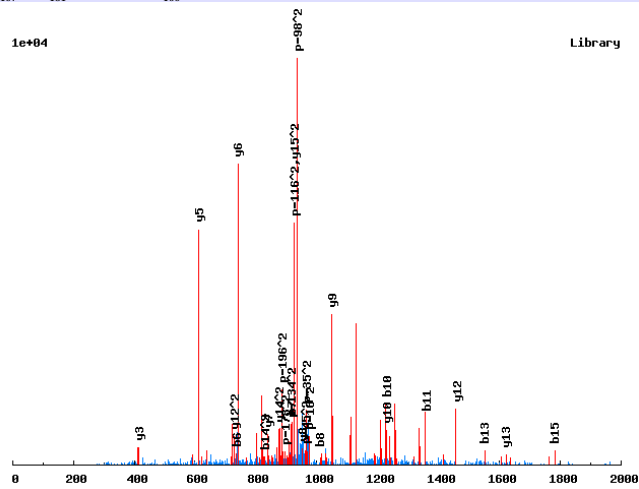

| Library | b <sup>1+</sup> | b <sup>2+</sup> | #  | AA     | #  | y <sup>1+</sup> | y <sup>2+</sup> |
|---------|-----------------|-----------------|----|--------|----|-----------------|-----------------|
|         | 115.0502        | 58.0287         | 1  | N      | 16 |                 |                 |
|         | 216.0979        | 108.5526        | 2  | T      | 15 | 1851.8165       | 926.4119        |
|         | 344.1565        | 172.5819        | 3  | Q      | 14 | 1750.7688       | 875.8880        |
|         | 511.1548        | 256.0811        | 4  | S[167] | 13 | 1622.7102       | 811.8587        |
|         | 608.2076        | 304.6074        | 5  | P      | 12 | 1455.7118       | 728.3596        |
|         | 736.2662        | 368.6367        | 6  | Q      | 11 | 1358.6591       | 679.8332        |
|         | 917.2802        | 459.1437        | 7  | T[181] | 10 | 1230.6005       | 615.8039        |
|         | 1014.3329       | 507.6701        | 8  | P      | 9  | 1049.5865       | 525.2969        |
|         | 1127.4170       | 564.2121        | 9  | L      | 8  | 952.5337        | 476.7705        |
|         | 1226.4854       | 613.7463        | 10 | V      | 7  | 839.4497        | 420.2285        |
|         | 1355.5280       | 678.2676        | 11 | E      | 6  | 740.3812        | 370.6943        |
|         | 1452.5808       | 726.7940        | 12 | P      | 5  | 611.3387        | 306.1730        |
|         | 1551.6492       | 776.3282        | 13 | V      | 4  | 514.2859        | 257.6466        |
|         | 1652.6969       | 826.8521        | 14 | T      | 3  | 415.2175        | 208.1124        |
|         | 1781.7394       | 891.3734        | 15 | E      | 2  | 314.1698        | 157.5885        |
|         |                 |                 | 16 | R[166] | 1  | 185.1272        | 93.0672         |

# Annotated spectra from Saleem et. al. 2009

K.NT<sub>181</sub>SSPPIS<sub>167</sub>PNAAAIQEEDSSK<sub>136</sub>-K/2

0.9998

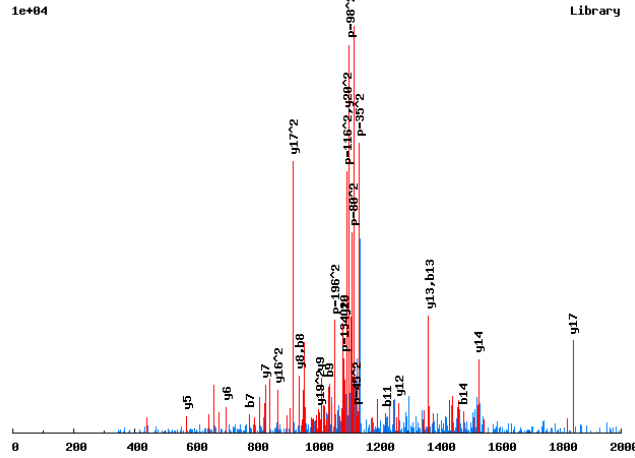

| Library | b <sup>1+</sup> | b <sup>2+</sup> | #  | AA      | #  | y <sup>1+</sup> | y <sup>2+</sup> |
|---------|-----------------|-----------------|----|---------|----|-----------------|-----------------|
|         | 115.0502        | 58.0287         | 1  | N       | 21 |                 |                 |
|         | 296.0642        | 148.5358        | 2  | T [181] | 20 | 2196.9189       | 1098.9631       |
|         | 383.0963        | 192.0518        | 3  | S       | 19 | 2015.9048       | 1008.4561       |
|         | 470.1283        | 235.5678        | 4  | S       | 18 | 1928.8728       | 964.9400        |
|         | 567.1810        | 284.0942        | 5  | P       | 17 | 1841.8408       | 921.4240        |
|         | 664.2338        | 332.6205        | 6  | P       | 16 | 1744.7880       | 872.8976        |
|         | 777.3179        | 389.1626        | 7  | I       | 15 | 1647.7353       | 824.3713        |
|         | 944.3162        | 472.6618        | 8  | S [167] | 14 | 1534.6512       | 767.8292        |
|         | 1041.3690       | 521.1881        | 9  | P       | 13 | 1367.6528       | 684.3301        |
|         | 1155.4119       | 578.2096        | 10 | N       | 12 | 1270.6001       | 635.8037        |
|         | 1226.4490       | 613.7282        | 11 | A       | 11 | 1156.5571       | 578.7822        |
|         | 1297.4861       | 649.2467        | 12 | A       | 10 | 1085.5200       | 543.2637        |
|         | 1368.5232       | 684.7653        | 13 | A       | 9  | 1014.4829       | 507.7451        |
|         | 1481.6073       | 741.3073        | 14 | I       | 8  | 943.4458        | 472.2265        |
|         | 1609.6659       | 805.3366        | 15 | Q       | 7  | 830.3618        | 415.6845        |
|         | 1738.7085       | 869.8579        | 16 | E       | 6  | 702.3032        | 351.6552        |
|         | 1867.7511       | 934.3792        | 17 | E       | 5  | 573.2606        | 287.1339        |
|         | 1982.7780       | 991.8926        | 18 | D       | 4  | 444.2180        | 222.6126        |
|         | 2069.8100       | 1035.4087       | 19 | S       | 3  | 329.1911        | 165.0992        |
|         | 2156.8421       | 1078.9247       | 20 | S       | 2  | 242.1590        | 121.5832        |
|         |                 |                 | 21 | K [136] | 1  | 155.1270        | 78.0671         |

# Annotated spectra from Saleem et. al. 2009

K.NT<sub>181</sub>T<sub>181</sub>S<sub>167</sub>S<sub>167</sub>SK.N/2

0.8033

1e+04

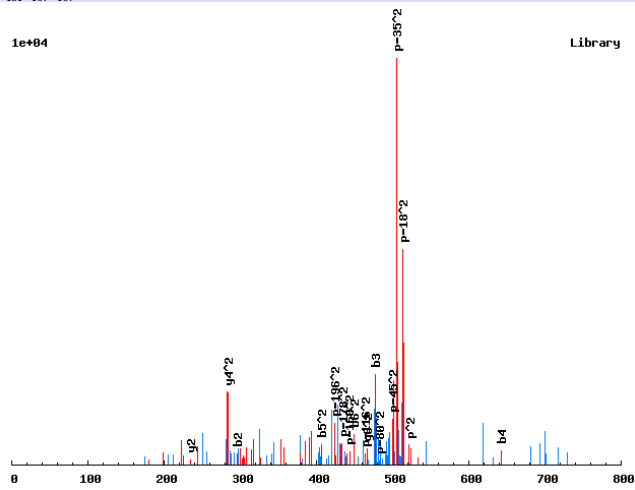

| Library | b <sup>1+</sup> | b <sup>2+</sup> | # | AA     | # | y <sup>1+</sup> | y <sup>2+</sup> |
|---------|-----------------|-----------------|---|--------|---|-----------------|-----------------|
|         | 115.0502        | 58.0287         | 1 | N      | 7 |                 |                 |
|         | 296.0642        | 148.5358        | 2 | T[181] | 6 | 930.1696        | 465.5884        |
|         | 477.0782        | 239.0428        | 3 | T[181] | 5 | 749.1556        | 375.0814        |
|         | 644.0766        | 322.5419        | 4 | S[167] | 4 | 568.1416        | 284.5744        |
|         | 811.0750        | 406.0411        | 5 | S[167] | 3 | 401.1432        | 201.0752        |
|         | 898.1070        | 449.5571        | 6 | S      | 2 | 234.1448        | 117.5761        |
|         |                 |                 | 7 | K      | 1 | 147.1128        | 74.0600         |

# Annotated spectra from Saleem et. al. 2009

K.NTVELY<sub>243</sub>QHSPS<sub>167</sub>PVMTTNK.T/3

0.9996

1e+04

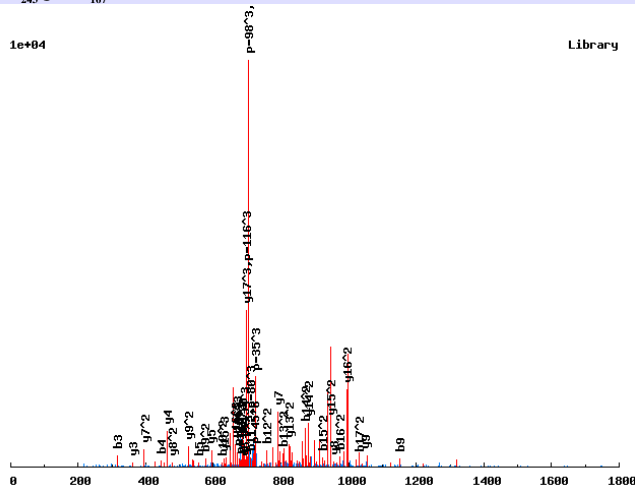

| Library | b <sup>1+</sup> | b <sup>2+</sup> | b <sup>3+</sup> | #  | AA      | #  | y <sup>1+</sup> | y <sup>2+</sup> | y <sup>3+</sup> |
|---------|-----------------|-----------------|-----------------|----|---------|----|-----------------|-----------------|-----------------|
|         | 115.0502        | 58.0287         | 39.0216         | 1  | N       | 18 |                 |                 |                 |
|         | 216.0979        | 108.5526        | 72.7042         | 2  | T       | 17 | 2091.8858       | 1046.4465       | 697.9668        |
|         | 315.1663        | 158.0868        | 105.7270        | 3  | V       | 16 | 1990.8381       | 995.9227        | 664.2842        |
|         | 444.2089        | 222.6081        | 148.7411        | 4  | E       | 15 | 1891.7697       | 946.3885        | 631.2614        |
|         | 557.2930        | 279.1501        | 186.4358        | 5  | L       | 14 | 1762.7271       | 881.8672        | 588.2472        |
|         | 800.3226        | 400.6649        | 267.4457        | 6  | Y [243] | 13 | 1649.6431       | 825.3252        | 550.5525        |
|         | 928.3812        | 464.6942        | 310.1319        | 7  | Q       | 12 | 1406.6134       | 703.8103        | 469.5427        |
|         | 1065.4401       | 533.2237        | 355.8182        | 8  | H       | 11 | 1278.5548       | 639.7810        | 426.8565        |
|         | 1152.4721       | 576.7397        | 384.8289        | 9  | S       | 10 | 1141.4959       | 571.2516        | 381.1702        |
|         | 1249.5249       | 625.2661        | 417.1798        | 10 | P       | 9  | 1054.4639       | 527.7356        | 352.1595        |
|         | 1416.5233       | 708.7653        | 472.8459        | 11 | S [167] | 8  | 957.4111        | 479.2092        | 319.8086        |
|         | 1513.5760       | 757.2916        | 505.1969        | 12 | P       | 7  | 790.4128        | 395.7100        | 264.1424        |
|         | 1612.6444       | 806.8259        | 538.2197        | 13 | V       | 6  | 693.3600        | 347.1836        | 231.7915        |
|         | 1743.6849       | 872.3461        | 581.8998        | 14 | M       | 5  | 594.2916        | 297.6494        | 198.7687        |
|         | 1844.7326       | 922.8699        | 615.5824        | 15 | T       | 4  | 463.2511        | 232.1292        | 155.0885        |
|         | 1945.7803       | 973.3938        | 649.2649        | 16 | T       | 3  | 362.2034        | 181.6053        | 121.4060        |
|         | 2059.8232       | 1030.4152       | 687.2793        | 17 | N       | 2  | 261.1557        | 131.0815        | 87.7234         |
|         |                 |                 |                 | 18 | K       | 1  | 147.1128        | 74.0600         | 49.7091         |

# Annotated spectra from Saleem et. al. 2009

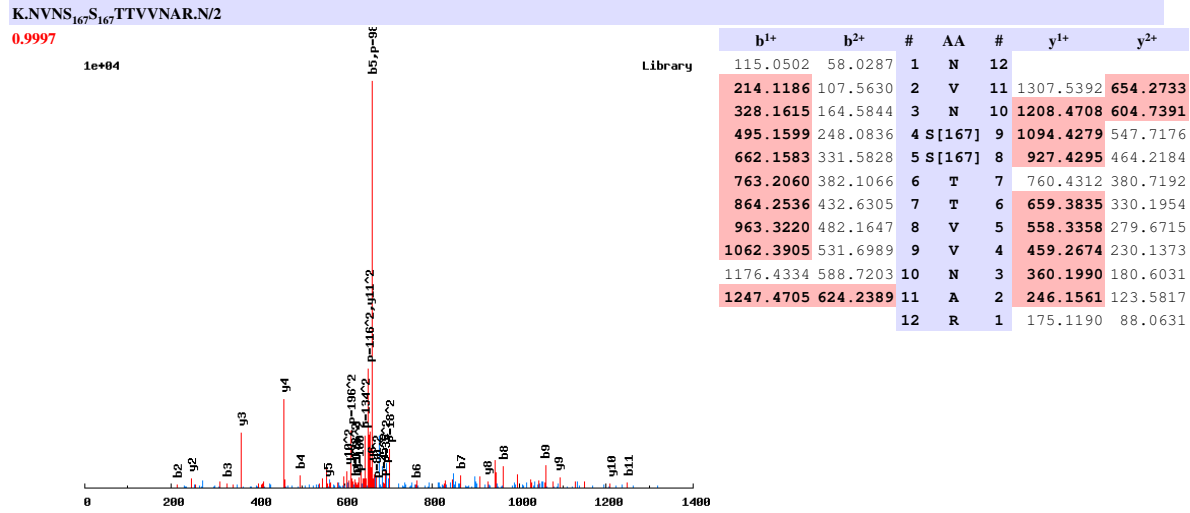

# Annotated spectra from Saleem et. al. 2009

K.NVPT<sub>181</sub>PS<sub>167</sub>PS<sub>167</sub>PKPQHR.R/2

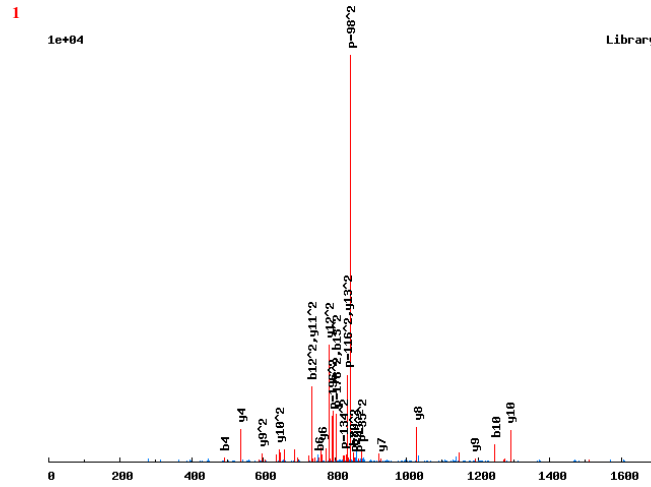

| Library | b <sup>1+</sup> | b <sup>2+</sup> | #  | AA      | #  | y <sup>1+</sup> | y <sup>2+</sup> |
|---------|-----------------|-----------------|----|---------|----|-----------------|-----------------|
|         | 115.0502        | 58.0287         | 1  | N       | 14 |                 |                 |
|         | 214.1186        | 107.5630        | 2  | V       | 13 | 1667.6743       | 834.3408        |
|         | 311.1714        | 156.0893        | 3  | P       | 12 | 1568.6059       | 784.8066        |
|         | 492.1854        | 246.5963        | 4  | T [181] | 11 | 1471.5532       | 736.2802        |
|         | 589.2382        | 295.1227        | 5  | P       | 10 | 1290.5392       | 645.7732        |
|         | 756.2365        | 378.6219        | 6  | S [167] | 9  | 1193.4864       | 597.2468        |
|         | 853.2893        | 427.1483        | 7  | P       | 8  | 1026.4880       | 513.7477        |
|         | 1020.2876       | 510.6475        | 8  | S [167] | 7  | 929.4353        | 465.2213        |
|         | 1117.3404       | 559.1738        | 9  | P       | 6  | 762.4369        | 381.7221        |
|         | 1245.4354       | 623.2213        | 10 | K       | 5  | 665.3842        | 333.1957        |
|         | 1342.4881       | 671.7477        | 11 | P       | 4  | 537.2892        | 269.1482        |
|         | 1470.5467       | 735.7770        | 12 | Q       | 3  | 440.2364        | 220.6219        |
|         | 1607.6056       | 804.3064        | 13 | H       | 2  | 312.1779        | 156.5926        |
|         |                 |                 | 14 | R       | 1  | 175.1190        | 88.0631         |

# Annotated spectra from Saleem et. al. 2009

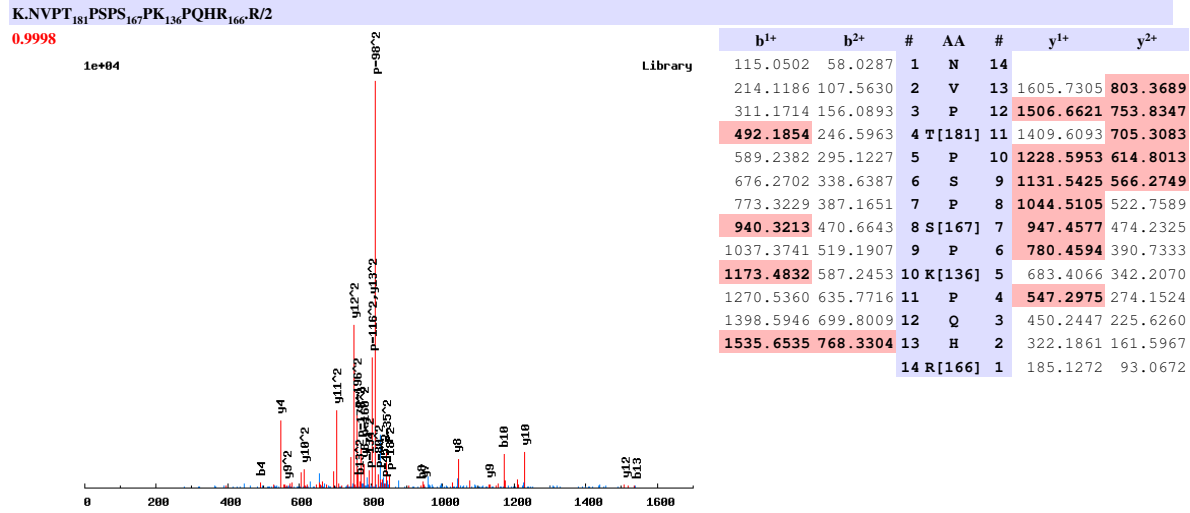

# Annotated spectra from Saleem et. al. 2009

K.NYWVNDVNS<sub>167</sub>PIIK.V/2

0.9914

1e+04

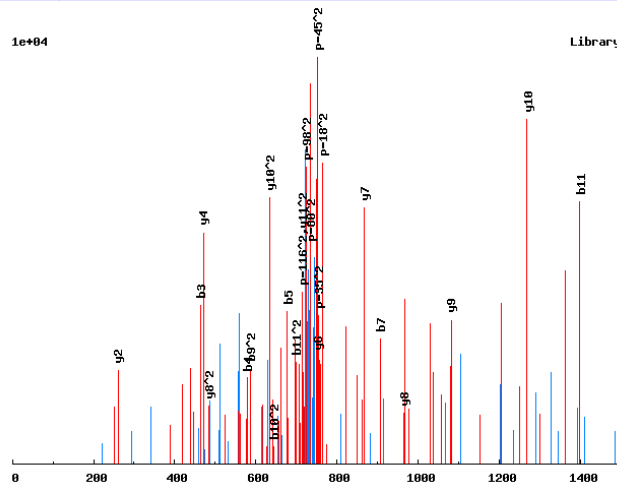

| Library | b <sup>1+</sup> | b <sup>2+</sup> | #  | AA     | #  | y <sup>1+</sup> | y <sup>2+</sup> |
|---------|-----------------|-----------------|----|--------|----|-----------------|-----------------|
|         | 115.0502        | 58.0287         | 1  | N      | 12 |                 |                 |
|         | 278.1135        | 139.5604        | 2  | Y      | 11 | 1429.6399       | 715.3236        |
|         | 464.1928        | 232.6001        | 3  | W      | 10 | 1266.5766       | 633.7919        |
|         | 579.2198        | 290.1135        | 4  | D      | 9  | 1080.4973       | 540.7523        |
|         | 678.2882        | 339.6477        | 5  | V      | 8  | 965.4703        | 483.2388        |
|         | 792.3311        | 396.6692        | 6  | N      | 7  | 866.4019        | 433.7046        |
|         | 907.3581        | 454.1827        | 7  | D      | 6  | 752.3590        | 376.6831        |
|         | 1074.3564       | 537.6819        | 8  | S[167] | 5  | 637.3320        | 319.1697        |
|         | 1171.4092       | 586.2082        | 9  | P      | 4  | 470.3337        | 235.6705        |
|         | 1284.4933       | 642.7503        | 10 | I      | 3  | 373.2809        | 187.1441        |
|         | 1397.5773       | 699.2923        | 11 | I      | 2  | 260.1969        | 130.6021        |
|         |                 |                 | 12 | K      | 1  | 147.1128        | 74.0600         |



# Annotated spectra from Saleem et. al. 2009

K.NYYNNVETNDDDYSDDGK<sub>136</sub>S<sub>167</sub>K<sub>136</sub>S/3

0.8534

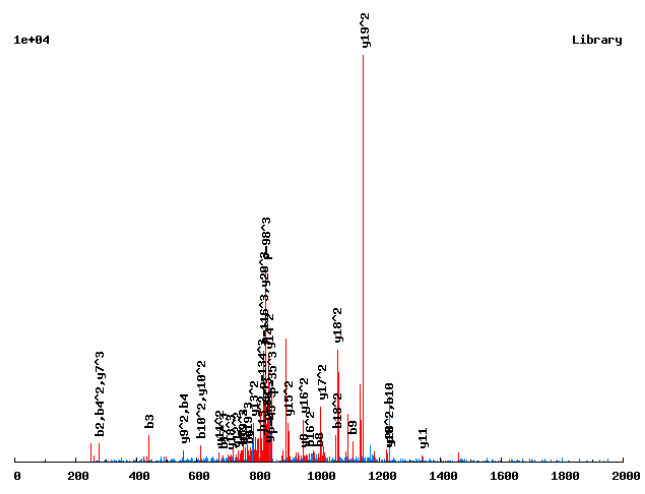

| Library | b <sup>1+</sup> | b <sup>2+</sup> | b <sup>3+</sup> | #  | AA     | #  | y <sup>1+</sup> | y <sup>2+</sup> | y <sup>3+</sup> |
|---------|-----------------|-----------------|-----------------|----|--------|----|-----------------|-----------------|-----------------|
|         | 115.0502        | 58.0287         | 39.0216         | 1  | N      | 21 |                 |                 |                 |
|         | 278.1135        | 139.5604        | 93.3760         | 2  | Y      | 20 | 2452.9271       | 1226.9672       | 818.3139        |
|         | 441.1769        | 221.0921        | 147.7305        | 3  | Y      | 19 | 2289.8638       | 1145.4355       | 763.9594        |
|         | 555.2198        | 278.1135        | 185.7448        | 4  | N      | 18 | 2126.8004       | 1063.9039       | 709.6050        |
|         | 669.2627        | 335.1350        | 223.7591        | 5  | N      | 17 | 2012.7575       | 1006.8824       | 671.5907        |
|         | 768.3311        | 384.6692        | 256.7819        | 6  | V      | 16 | 1898.7146       | 949.8609        | 633.5764        |
|         | 897.3737        | 449.1905        | 299.7961        | 7  | E      | 15 | 1799.6462       | 900.3267        | 600.5536        |
|         | 998.4214        | 499.7143        | 333.4787        | 8  | T      | 14 | 1670.6036       | 835.8054        | 557.5394        |
|         | 1112.4643       | 556.7358        | 371.4930        | 9  | N      | 13 | 1569.5559       | 785.2816        | 523.8568        |
|         | 1227.4913       | 614.2493        | 409.8353        | 10 | D      | 12 | 1455.5130       | 728.2601        | 485.8425        |
|         | 1342.5182       | 671.7627        | 448.1776        | 11 | D      | 11 | 1340.4860       | 670.7467        | 447.5002        |
|         | 1457.5452       | 729.2762        | 486.5199        | 12 | D      | 10 | 1225.4591       | 613.2332        | 409.1579        |
|         | 1620.6085       | 810.8079        | 540.8743        | 13 | Y      | 9  | 1110.4322       | 555.7197        | 370.8156        |
|         | 1735.6354       | 868.3214        | 579.2167        | 14 | D      | 8  | 947.3688        | 474.1881        | 316.4611        |
|         | 1822.6675       | 911.8374        | 608.2273        | 15 | S      | 7  | 832.3419        | 416.6746        | 278.1188        |
|         | 1937.6944       | 969.3508        | 646.5697        | 16 | D      | 6  | 745.3099        | 373.1586        | 249.1081        |
|         | 2052.7213       | 1026.8643       | 684.9120        | 17 | D      | 5  | 630.2829        | 315.6451        | 210.7658        |
|         | 2109.7428       | 1055.3750       | 703.9191        | 18 | G      | 4  | 515.2560        | 258.1316        | 172.4235        |
|         | 2245.8520       | 1123.4296       | 749.2888        | 19 | K[136] | 3  | 458.2345        | 229.6209        | 153.4164        |
|         | 2412.8503       | 1206.9288       | 804.9550        | 20 | S[167] | 2  | 322.1254        | 161.5663        | 108.0466        |
|         |                 |                 |                 | 21 | K[136] | 1  | 155.1270        | 78.0671         | 52.3805         |

# Annotated spectra from Saleem et. al. 2009

M.PDNNTQLQGS<sub>167</sub>PSS<sub>167</sub>DQR<sub>166</sub>L/2

0.9795

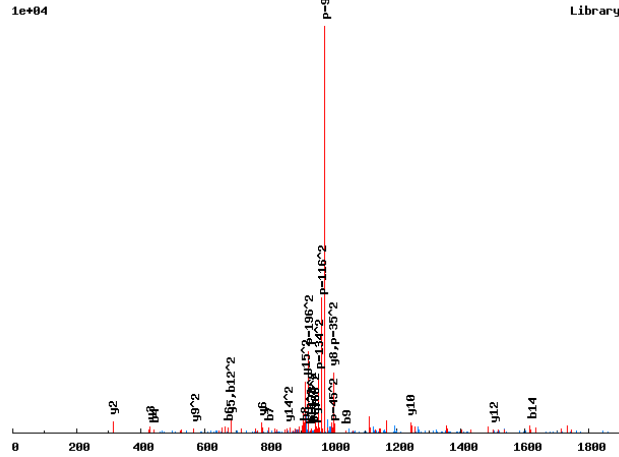

| Library | b <sup>1+</sup> | b <sup>2+</sup> | #  | AA     | #  | y <sup>1+</sup> | y <sup>2+</sup> |
|---------|-----------------|-----------------|----|--------|----|-----------------|-----------------|
|         | 98.0600         | 49.5337         | 1  | P      | 17 |                 |                 |
|         | 213.0870        | 107.0471        | 2  | D      | 16 | 1945.7200       | 973.3636        |
|         | 327.1299        | 164.0686        | 3  | N      | 15 | 1830.6931       | 915.8502        |
|         | 441.1728        | 221.0901        | 4  | N      | 14 | 1716.6501       | 858.8287        |
|         | 542.2205        | 271.6139        | 5  | T      | 13 | 1602.6072       | 801.8072        |
|         | 671.2631        | 336.1352        | 6  | E      | 12 | 1501.5595       | 751.2834        |
|         | 799.3217        | 400.1645        | 7  | Q      | 11 | 1372.5169       | 686.7621        |
|         | 912.4058        | 456.7065        | 8  | L      | 10 | 1244.4584       | 622.7328        |
|         | 1040.4643       | 520.7358        | 9  | Q      | 9  | 1131.3743       | 566.1908        |
|         | 1097.4858       | 549.2465        | 10 | G      | 8  | 1003.3157       | 502.1615        |
|         | 1264.4842       | 632.7457        | 11 | S[167] | 7  | 946.2943        | 473.6508        |
|         | 1361.5369       | 681.2721        | 12 | P      | 6  | 779.2959        | 390.1516        |
|         | 1448.5689       | 724.7881        | 13 | S      | 5  | 682.2431        | 341.6252        |
|         | 1615.5673       | 808.2873        | 14 | S[167] | 4  | 595.2111        | 298.1092        |
|         | 1730.5942       | 865.8008        | 15 | D      | 3  | 428.2127        | 214.6100        |
|         | 1858.6528       | 929.8301        | 16 | Q      | 2  | 313.1858        | 157.0965        |
|         |                 |                 | 17 | R[166] | 1  | 185.1272        | 93.0672         |

# Annotated spectra from Saleem et. al. 2009

M.PS<sub>167</sub>SLTK<sub>136</sub>TES<sub>167</sub>NSDPR<sub>166</sub>-T/2

0.778

1e+04

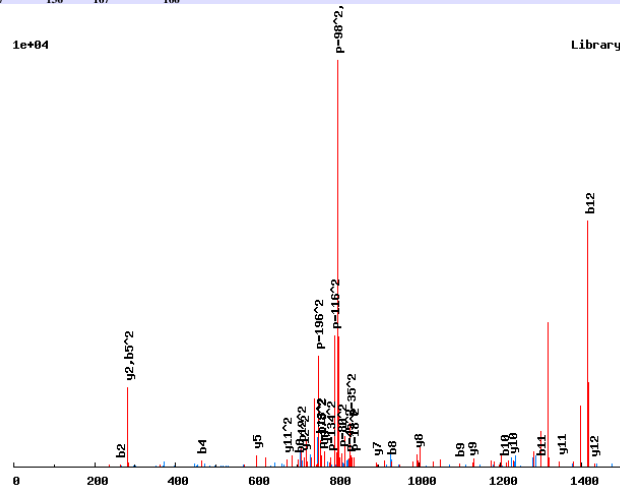

| Library | b <sup>1+</sup> | b <sup>2+</sup> | #  | AA     | #  | y <sup>1+</sup> | y <sup>2+</sup> |
|---------|-----------------|-----------------|----|--------|----|-----------------|-----------------|
|         | 98.0600         | 49.5337         | 1  | P      | 14 |                 |                 |
|         | 265.0584        | 133.0328        | 2  | S[167] | 13 | 1599.6418       | 800.3245        |
|         | 352.0904        | 176.5489        | 3  | S      | 12 | 1432.6434       | 716.8254        |
|         | 465.1745        | 233.0909        | 4  | L      | 11 | 1345.6114       | 673.3093        |
|         | 566.2222        | 283.6147        | 5  | T      | 10 | 1232.5273       | 616.7673        |
|         | 702.3313        | 351.6693        | 6  | K[136] | 9  | 1131.4797       | 566.2435        |
|         | 803.3790        | 402.1931        | 7  | T      | 8  | 995.3705        | 498.1889        |
|         | 932.4216        | 466.7144        | 8  | E      | 7  | 894.3228        | 447.6651        |
|         | 1099.4200       | 550.2136        | 9  | S[167] | 6  | 765.2802        | 383.1438        |
|         | 1213.4629       | 607.2351        | 10 | N      | 5  | 598.2819        | 299.6446        |
|         | 1300.4949       | 650.7511        | 11 | S      | 4  | 484.2389        | 242.6231        |
|         | 1415.5219       | 708.2646        | 12 | D      | 3  | 397.2069        | 199.1071        |
|         | 1512.5746       | 756.7910        | 13 | P      | 2  | 282.1800        | 141.5936        |
|         |                 |                 | 14 | R[166] | 1  | 185.1272        | 93.0672         |

# Annotated spectra from Saleem et. al. 2009

M.PYIGASNLS<sub>167</sub>EHS<sub>167</sub>FVNLK.E/2

0.9655

1e+04

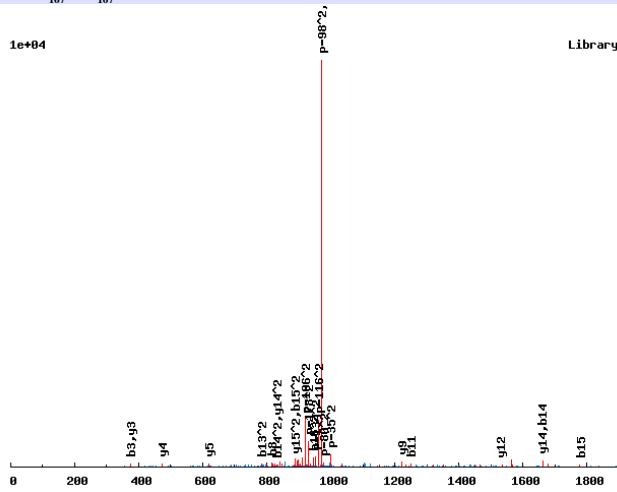

| Library | b <sup>1+</sup> | b <sup>2+</sup> | #  | AA     | #  | y <sup>1+</sup> | y <sup>2+</sup> |
|---------|-----------------|-----------------|----|--------|----|-----------------|-----------------|
|         | 98.0600         | 49.5337         | 1  | P      | 17 |                 |                 |
|         | 261.1234        | 131.0653        | 2  | Y      | 16 | 1938.8398       | 969.9235        |
|         | 374.2074        | 187.6074        | 3  | I      | 15 | 1775.7765       | 888.3919        |
|         | 431.2289        | 216.1181        | 4  | G      | 14 | 1662.6924       | 831.8499        |
|         | 502.2660        | 251.6366        | 5  | A      | 13 | 1605.6710       | 803.3391        |
|         | 589.2980        | 295.1527        | 6  | S      | 12 | 1534.6339       | 767.8206        |
|         | 703.3410        | 352.1741        | 7  | N      | 11 | 1447.6018       | 724.3046        |
|         | 816.4250        | 408.7162        | 8  | L      | 10 | 1333.5589       | 667.2831        |
|         | 983.4234        | 492.2153        | 9  | S[167] | 9  | 1220.4748       | 610.7411        |
|         | 1112.4660       | 556.7366        | 10 | E      | 8  | 1053.4765       | 527.2419        |
|         | 1249.5249       | 625.2661        | 11 | H      | 7  | 924.4339        | 462.7206        |
|         | 1416.5232       | 708.7653        | 12 | S[167] | 6  | 787.3750        | 394.1911        |
|         | 1563.5917       | 782.2995        | 13 | F      | 5  | 620.3766        | 310.6919        |
|         | 1662.6601       | 831.8337        | 14 | V      | 4  | 473.3082        | 237.1577        |
|         | 1776.7030       | 888.8551        | 15 | N      | 3  | 374.2398        | 187.6235        |
|         | 1889.7871       | 945.3972        | 16 | L      | 2  | 260.1969        | 130.6021        |
|         |                 |                 | 17 | K      | 1  | 147.1128        | 74.0600         |

# Annotated spectra from Saleem et. al. 2009

K<sub>111</sub>AS<sub>167</sub>AAVS<sub>167</sub>EK<sub>136</sub>K<sub>136</sub>ETK<sub>136</sub>K/2

0.8833

1e+04

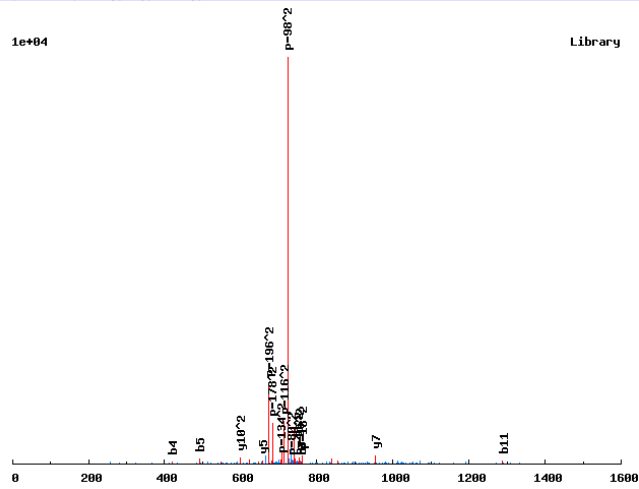

| Library | b <sup>1+</sup> | b <sup>2+</sup> | #  | AA | #     | y <sup>1+</sup> | y <sup>2+</sup>    |
|---------|-----------------|-----------------|----|----|-------|-----------------|--------------------|
|         | 112.0393        | 56.5233         | 1  | Q  | [111] | 13              |                    |
|         | 183.0764        | 92.0419         | 2  | A  | 12    | 1432.6546       | 716.8310           |
|         | 350.0748        | 175.5410        | 3  | S  | [167] | 11              | 1361.6175 681.3124 |
|         | 421.1119        | 211.0596        | 4  | A  | 10    | 1194.6192       | 597.8132           |
|         | 492.1490        | 246.5781        | 5  | A  | 9     | 1123.5821       | 562.2947           |
|         | 591.2174        | 296.1123        | 6  | V  | 8     | 1052.5449       | 526.7761           |
|         | 758.2158        | 379.6115        | 7  | S  | [167] | 7               | 953.4765 477.2419  |
|         | 887.2584        | 444.1328        | 8  | E  | 6     | 786.4782        | 393.7427           |
|         | 1023.3675       | 512.1874        | 9  | K  | [136] | 5               | 657.4356 329.2214  |
|         | 1159.4767       | 580.2420        | 10 | K  | [136] | 4               | 521.3264 261.1669  |
|         | 1288.5193       | 644.7633        | 11 | E  | 3     | 385.2173        | 193.1123           |
|         | 1389.5670       | 695.2871        | 12 | T  | 2     | 256.1747        | 128.5910           |
|         |                 |                 | 13 | K  | [136] | 1               | 155.1270 78.0671   |

# Annotated spectra from Saleem et. al. 2009

K<sub>111</sub>ATSM<sub>T</sub><sub>181</sub>PTHS<sub>167</sub>PVR<sub>166</sub>K/2

0.8221

1e+04

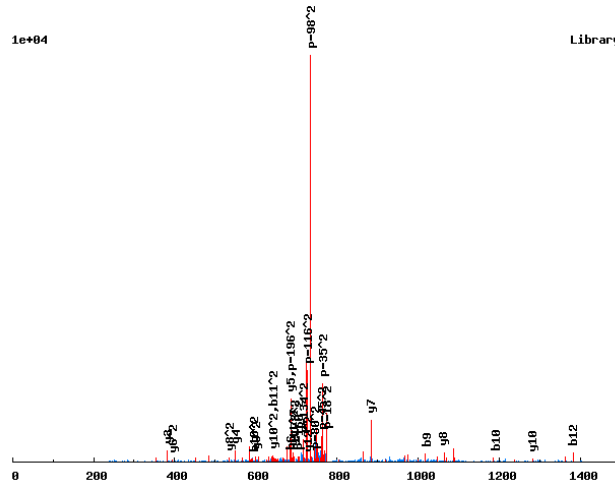

| Library | b <sup>1+</sup> | b <sup>2+</sup> | #  | AA | #  | y <sup>1+</sup> | y <sup>2+</sup> |
|---------|-----------------|-----------------|----|----|----|-----------------|-----------------|
|         | 112.0393        | 56.5233         | 1  | Q  | 13 |                 |                 |
|         | 183.0764        | 92.0419         | 2  | A  | 12 | 1454.5774       | 727.7924        |
|         | 284.1241        | 142.5657        | 3  | T  | 11 | 1383.5403       | 692.2738        |
|         | 371.1561        | 186.0817        | 4  | S  | 10 | 1282.4926       | 641.7500        |
|         | 502.1966        | 251.6020        | 5  | M  | 9  | 1195.4606       | 598.2339        |
|         | 683.2106        | 342.1090        | 6  | T  | 8  | 1064.4201       | 532.7137        |
|         | 780.2634        | 390.6353        | 7  | P  | 7  | 883.4061        | 442.2067        |
|         | 881.3111        | 441.1592        | 8  | T  | 6  | 786.3533        | 393.6803        |
|         | 1018.3700       | 509.6886        | 9  | H  | 5  | 685.3057        | 343.1565        |
|         | 1185.3683       | 593.1878        | 10 | S  | 4  | 548.2468        | 274.6270        |
|         | 1282.4211       | 641.7142        | 11 | P  | 3  | 381.2484        | 191.1278        |
|         | 1381.4895       | 691.2484        | 12 | V  | 2  | 284.1956        | 142.6015        |
|         |                 |                 | 13 | R  | 1  | 185.1272        | 93.0672         |

# Annotated spectra from Saleem et. al. 2009

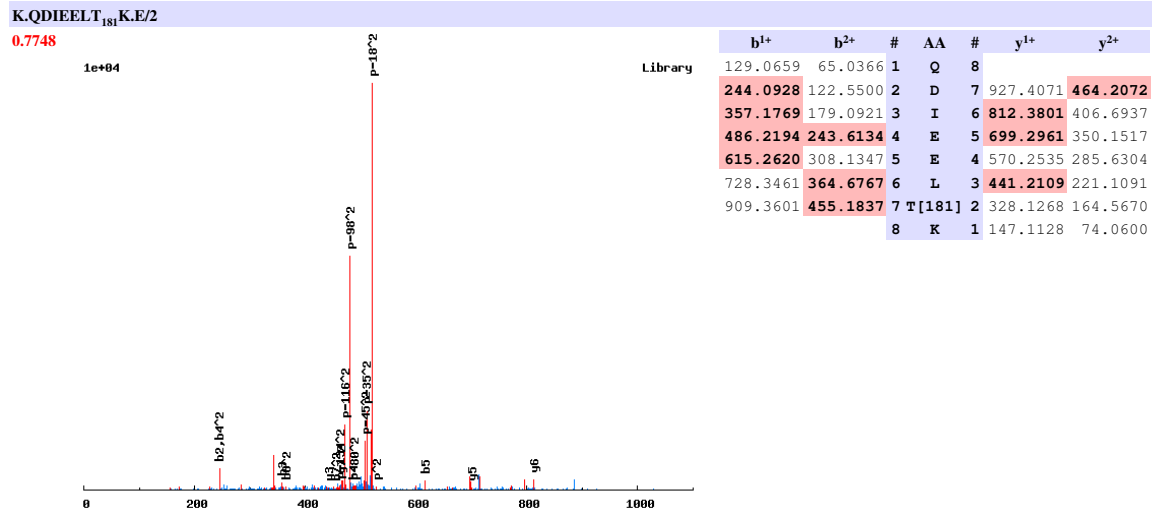

# Annotated spectra from Saleem et. al. 2009

K.QEAPK<sub>136</sub>S<sub>167</sub>PS<sub>167</sub>PLK<sub>136</sub>S/2

0.9645

1e+04

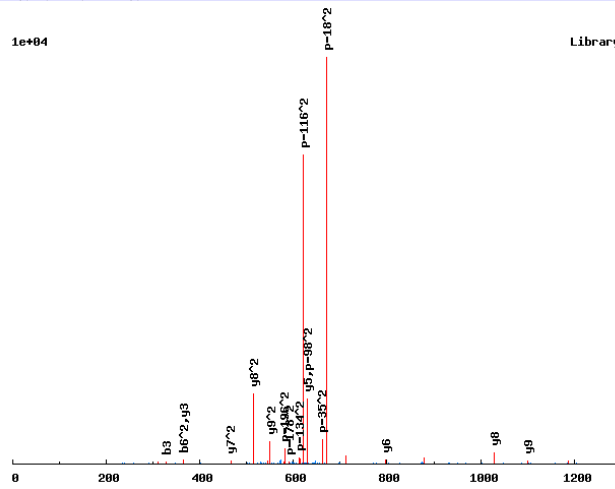

| Library | b <sup>1+</sup> | b <sup>2+</sup> | #  | AA     | #  | y <sup>1+</sup> | y <sup>2+</sup> |
|---------|-----------------|-----------------|----|--------|----|-----------------|-----------------|
|         | 129.0659        | 65.0366         | 1  | Q      | 11 |                 |                 |
|         | 258.1085        | 129.5579        | 2  | E      | 10 | 1229.5549       | 615.2811        |
|         | 329.1456        | 165.0764        | 3  | A      | 9  | 1100.5123       | 550.7598        |
|         | 426.1983        | 213.6028        | 4  | P      | 8  | 1029.4752       | 515.2413        |
|         | 562.3075        | 281.6574        | 5  | K[136] | 7  | 932.4225        | 466.7149        |
|         | 729.3058        | 365.1566        | 6  | S[167] | 6  | 796.3133        | 398.6603        |
|         | 826.3586        | 413.6829        | 7  | P      | 5  | 629.3149        | 315.1611        |
|         | 993.3570        | 497.1821        | 8  | S[167] | 4  | 532.2622        | 266.6347        |
|         | 1090.4097       | 545.7085        | 9  | P      | 3  | 365.2638        | 183.1355        |
|         | 1203.4938       | 602.2505        | 10 | L      | 2  | 268.2111        | 134.6092        |
|         |                 |                 | 11 | K[136] | 1  | 155.1270        | 78.0671         |



# Annotated spectra from Saleem et. al. 2009

K<sub>111</sub>ES<sub>167</sub>DDEDEDEEKRL/2

0.9752

1e+04

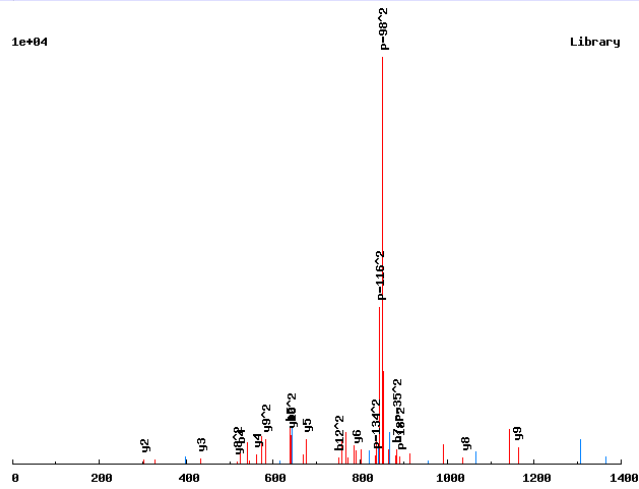

| Library | b <sup>1+</sup> | b <sup>2+</sup> | #  | AA | #     | y <sup>1+</sup> | y <sup>2+</sup>    |
|---------|-----------------|-----------------|----|----|-------|-----------------|--------------------|
|         | 112.0393        | 56.5233         | 1  | Q  | [111] | 14              |                    |
|         | 241.0819        | 121.0446        | 2  | E  | 13    | 1690.5599       | 845.7836           |
|         | 408.0803        | 204.5438        | 3  | S  | [167] | 12              | 1561.5173 781.2623 |
|         | 523.1072        | 262.0572        | 4  | D  | 11    | 1394.5190       | 697.7631           |
|         | 638.1341        | 319.5707        | 5  | D  | 10    | 1279.4920       | 640.2497           |
|         | 767.1767        | 384.0920        | 6  | E  | 9     | 1164.4651       | 582.7362           |
|         | 882.2037        | 441.6055        | 7  | D  | 8     | 1035.4225       | 518.2149           |
|         | 1011.2463       | 506.1268        | 8  | E  | 7     | 920.3956        | 460.7014           |
|         | 1126.2732       | 563.6402        | 9  | D  | 6     | 791.3530        | 396.1801           |
|         | 1241.3001       | 621.1537        | 10 | D  | 5     | 676.3260        | 338.6667           |
|         | 1370.3427       | 685.6750        | 11 | E  | 4     | 561.2991        | 281.1532           |
|         | 1499.3853       | 750.1963        | 12 | E  | 3     | 432.2565        | 216.6319           |
|         | 1627.4803       | 814.2438        | 13 | K  | 2     | 303.2139        | 152.1106           |
|         |                 |                 | 14 | R  | 1     | 175.1190        | 88.0631            |

# Annotated spectra from Saleem et. al. 2009

R.QEERS<sub>167</sub>S<sub>167</sub>LSNDVR.S/2

0.9096

1e+04

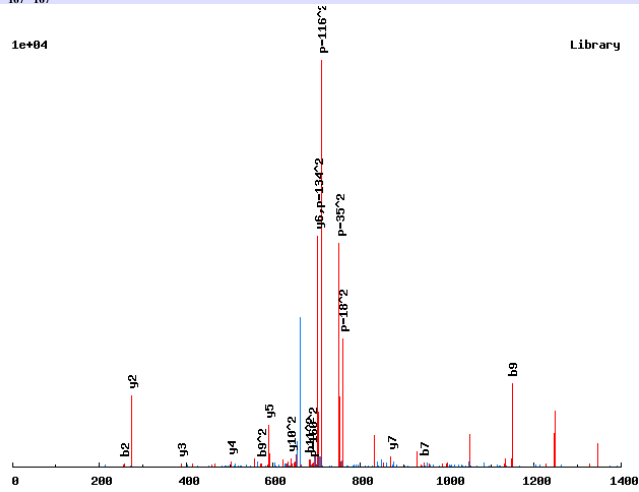

| Library | b <sup>1+</sup>  | b <sup>2+</sup> | #  | AA     | #  | y <sup>1+</sup> | y <sup>2+</sup> |
|---------|------------------|-----------------|----|--------|----|-----------------|-----------------|
|         | 129.0659         | 65.0366         | 1  | Q      | 12 |                 |                 |
|         | <b>258.1085</b>  | 129.5579        | 2  | E      | 11 | 1409.5458       | 705.2765        |
|         | 345.1405         | 173.0739        | 3  | S      | 10 | 1280.5032       | <b>640.7552</b> |
|         | 501.2416         | 251.1244        | 4  | R      | 9  | 1193.4712       | 597.2392        |
|         | 668.2400         | 334.6236        | 5  | S[167] | 8  | 1037.3700       | 519.1887        |
|         | 835.2383         | 418.1228        | 6  | S[167] | 7  | <b>870.3717</b> | 435.6895        |
|         | <b>948.3224</b>  | 474.6648        | 7  | L      | 6  | <b>703.3733</b> | 352.1903        |
|         | 1035.3544        | 518.1808        | 8  | S      | 5  | <b>590.2893</b> | 295.6483        |
|         | <b>1149.3973</b> | <b>575.2023</b> | 9  | N      | 4  | <b>503.2572</b> | 252.1323        |
|         | 1264.4243        | 632.7158        | 10 | D      | 3  | <b>389.2143</b> | 195.1108        |
|         | 1363.4927        | <b>682.2500</b> | 11 | V      | 2  | <b>274.1874</b> | 137.5973        |
|         |                  |                 | 12 | R      | 1  | 175.1190        | 88.0631         |

Annotated spectra from Saleem et. al. 2009

K<sub>111</sub>Q<sub>111</sub>FEDHQ<sub>167</sub>S<sub>167</sub>EEDASEK<sub>136</sub>DSR<sub>166</sub>Q/2

0.606

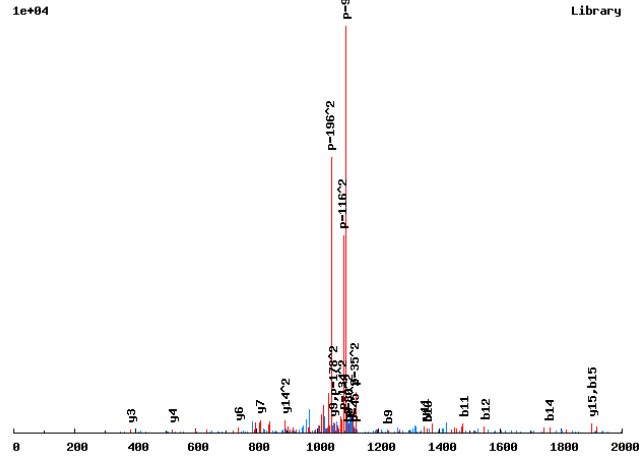

| Library | b <sup>1+</sup> | b <sup>2+</sup> | #  | AA | #     | y <sup>1+</sup> | y <sup>2+</sup> |          |
|---------|-----------------|-----------------|----|----|-------|-----------------|-----------------|----------|
|         | 112.0393        | 56.5233         | 1  | Q  | [111] | 18              |                 |          |
|         | 259.1077        | 130.0575        | 2  | F  | 17    | 2173.7713       | 1087.3893       |          |
|         | 388.1503        | 194.5788        | 3  | E  | 16    | 2026.7029       | 1013.8551       |          |
|         | 503.1773        | 252.0923        | 4  | D  | 15    | 1897.6603       | 949.3338        |          |
|         | 640.2362        | 320.6217        | 5  | H  | 14    | 1782.6334       | 891.8203        |          |
|         | 768.2947        | 384.6510        | 6  | Q  | 13    | 1645.5745       | 823.2909        |          |
|         | 935.2931        | 468.1502        | 7  | S  | [167] | 12              | 1517.5159       | 759.2616 |
|         | 1102.2915       | 551.6494        | 8  | S  | [167] | 11              | 1350.5176       | 675.7624 |
|         | 1231.3341       | 616.1707        | 9  | E  | 10    | 1183.5192       | 592.2632        |          |
|         | 1360.3766       | 680.6920        | 10 | E  | 9     | 1054.4766       | 527.7419        |          |
|         | 1475.4036       | 738.2054        | 11 | D  | 8     | 925.4340        | 463.2206        |          |
|         | 1546.4407       | 773.7240        | 12 | A  | 7     | 810.4071        | 405             |          |

# Annotated spectra from Saleem et. al. 2009

K<sub>111</sub>GPSES<sub>167</sub>PS<sub>167</sub>PTKVK.S/2

0.7933

1e+04

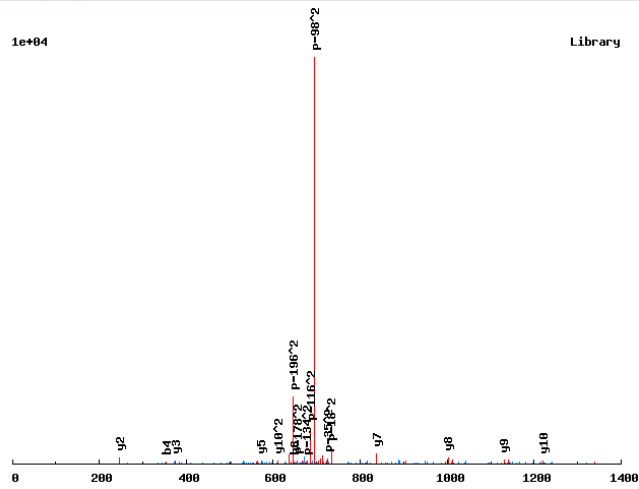

| Library | b <sup>1+</sup> | b <sup>2+</sup> | #  | AA | #     | y <sup>1+</sup> | y <sup>2+</sup> |
|---------|-----------------|-----------------|----|----|-------|-----------------|-----------------|
|         | 112.0393        | 56.5233         | 1  | Q  | [111] | 13              |                 |
|         | 169.0608        | 85.0340         | 2  | G  | 12    | 1373.5749       | 687.2911        |
|         | 266.1135        | 133.5604        | 3  | P  | 11    | 1316.5535       | 658.7804        |
|         | 353.1456        | 177.0764        | 4  | S  | 10    | 1219.5007       | 610.2540        |
|         | 482.1882        | 241.5977        | 5  | E  | 9     | 1132.4687       | 566.7380        |
|         | 649.1865        | 325.0969        | 6  | S  | [167] | 8               | 1003.4261       |
|         | 746.2393        | 373.6233        | 7  | P  | 7     | 836.4277        | 418.7175        |
|         | 913.2376        | 457.1225        | 8  | S  | [167] | 6               | 739.3750        |
|         | 1010.2904       | 505.6488        | 9  | P  | 5     | 572.3766        | 286.6919        |
|         | 1111.3381       | 556.1727        | 10 | T  | 4     | 475.3238        | 238.1656        |
|         | 1239.4330       | 620.2202        | 11 | K  | 3     | 374.2762        | 187.6417        |
|         | 1338.5014       | 669.7544        | 12 | V  | 2     | 246.1812        | 123.5942        |
|         |                 |                 | 13 | K  | 1     | 147.1128        | 74.0600         |

Annotated spectra from Saleem et. al. 2009

R.Q<sub>111</sub>HVSS<sub>167</sub>TASIT<sub>181</sub>SGGHNDLVQIEQPQK.D/3

0.9972

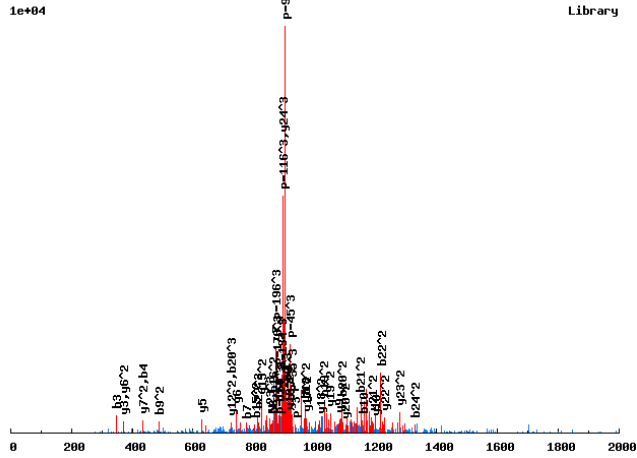

| Library | b <sup>1+</sup> | b <sup>2+</sup> | b <sup>3+</sup> | #  | AA     | #  | y <sup>1+</sup> | y <sup>2+</sup> | y <sup>3+</sup> |
|---------|-----------------|-----------------|-----------------|----|--------|----|-----------------|-----------------|-----------------|
|         | 112.0393        | 56.5233         | 38.0180         | 1  | Q[111] | 25 |                 |                 |                 |
|         | 249.0982        | 125.0528        | 83.7043         | 2  | H      | 24 | 2693.1968       | 1347.1020       | 898.4038        |
|         | 348.1666        | 174.5870        | 116.7271        | 3  | V      | 23 | 2556.1378       | 1278.5726       | 852.7175        |
|         | 435.1987        | 218.1030        | 145.7377        | 4  | S      | 22 | 2457.0694       | 1229.0384       | 819.6947        |
|         | 602.1970        | 301.6022        | 201.4039        | 5  | S[167] | 21 | 2370.0374       | 1185.5223       | 790.6840        |
|         | 703.2447        | 352.1260        | 235.0864        | 6  | T      | 20 | 2203.0390       | 1102.0232       | 735.0179        |
|         | 774.2818        | 387.6445        | 258.7655        | 7  | A      | 19 | 2101.9914       | 1051.4993       | 701.3353        |
|         | 861.3138        | 431.1606        | 287.7761        | 8  | S      | 18 | 2030.9543       | 1015.9808       | 677.6563        |
|         | 974.3979        | 487.7026        | 325.4708        | 9  | I      | 17 | 1943.9222       | 972.4648        | 648.6456        |
|         | 1155.4119       | 578.2096        | 385.8088        | 10 | T[181] | 16 | 1830.8382       | 915.9227        | 610.9509        |
|         | 1242.4439       | 621.7256        | 414.8195        | 11 | S      | 15 | 1649.8241       | 825.4157        | 550.6129        |
|         | 1299.4654       | 650.2363        | 433.8267        | 12 | G      | 14 | 1562.7921       | 781.8997        | 521.6022        |
|         | 1356.4869       | 678.7471        | 452.8338        | 13 | G      | 13 | 1505.7707       | 753.3890        | 502.5951        |
|         | 1493.5458       | 747.2765        | 498.5201        | 14 | H      | 12 | 1448.7492       | 724.8782        | 483.5879        |
|         | 1607.5887       | 804.2980        | 536.5344        | 15 | N      | 11 | 1311.6903       | 656.3488        | 437.9016        |
|         | 1722.6156       | 861.8115        | 574.8767        | 16 | D      | 10 | 1197.6474       | 599.3273        | 399.8873        |
|         | 1835.6997       | 918.3535        | 612.5714        | 17 | L      | 9  | 1082.6204       | 541.8139        | 361.5450        |
|         | 1934.7681       | 967.8877        | 645.5942        | 18 | V      | 8  | 969.5364        | 485.2718        | 323.8503        |
|         | 2062.8267       | 1031.9170       | 688.2804        | 19 | Q      | 7  | 870.4680        | 435.7376        | 290.8275        |
|         | 2175.9108       | 1088.4590       | 725.9751        | 20 | I      | 6  | 742.4094        | 371.7083        | 248.1413        |
|         | 2304.9533       | 1152.9803       | 768.9893        | 21 | E      | 5  | 629.3253        | 315.1663        | 210.4466        |
|         | 2433.0119       | 1217.0096       | 811.6755        | 22 | Q      | 4  | 500.2827        | 250.6450        | 167.4324        |
|         | 2530.0647       | 1265.5360       | 844.0264        | 23 | P      | 3  | 372.2241        | 186.6157        | 124.7462        |
|         | 2658.1233       | 1329.5653       | 886.7126        | 24 | Q      | 2  | 275.1714        | 138.0893        | 92.3953         |
|         |                 |                 |                 | 25 | K      | 1  | 147.1128        | 74.0600         | 49.7091         |

# Annotated spectra from Saleem et. al. 2009

K.Q<sub>111</sub>KES<sub>167</sub>EEDEDEIDPSEWVK.E/2

0.9794

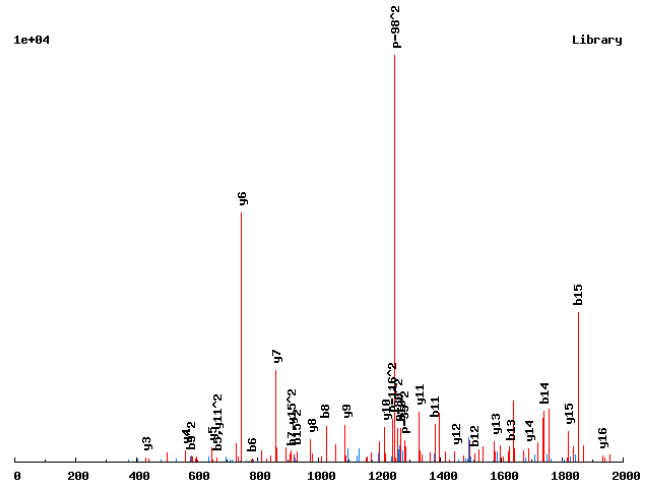

| Library | b <sup>1+</sup> | b <sup>2+</sup> | #  | AA     | #  | y <sup>1+</sup> | y <sup>2+</sup> |
|---------|-----------------|-----------------|----|--------|----|-----------------|-----------------|
|         | 112.0393        | 56.5233         | 1  | Q[111] | 21 |                 |                 |
|         | 240.1343        | 120.5708        | 2  | K      | 20 | 2486.9970       | 1244.0021       |
|         | 369.1769        | 185.0921        | 3  | E      | 19 | 2358.9020       | 1179.9547       |
|         | 536.1752        | 268.5913        | 4  | S[167] | 18 | 2229.8594       | 1115.4334       |
|         | 665.2178        | 333.1125        | 5  | E      | 17 | 2062.8611       | 1031.9342       |
|         | 780.2448        | 390.6260        | 6  | D      | 16 | 1933.8185       | 967.4129        |
|         | 909.2873        | 455.1473        | 7  | E      | 15 | 1818.7916       | 909.8994        |
|         | 1024.3143       | 512.6608        | 8  | D      | 14 | 1689.7490       | 845.3781        |
|         | 1153.3569       | 577.1821        | 9  | E      | 13 | 1574.7220       | 787.8646        |
|         | 1268.3838       | 634.6955        | 10 | D      | 12 | 1445.6794       | 723.3434        |
|         | 1383.4108       | 692.2090        | 11 | D      | 11 | 1330.6525       | 665.8299        |
|         | 1512.4533       | 756.7303        | 12 | E      | 10 | 1215.6255       | 608.3164        |
|         | 1625.5374       | 813.2723        | 13 | I      | 9  | 1086.5830       | 543.7951        |
|         | 1738.6215       | 869.8144        | 14 | I      | 8  | 973.4989        | 487.2531        |
|         | 1853.6484       | 927.3278        | 15 | D      | 7  | 860.4148        | 430.7111        |
|         | 1950.7012       | 975.8542        | 16 | P      | 6  | 745.3879        | 373.1976        |
|         | 2037.7332       | 1019.3702       | 17 | S      | 5  | 648.3351        | 324.6712        |
|         | 2166.7758       | 1083.8915       | 18 | E      | 4  | 561.3031        | 281.1552        |
|         | 2352.8551       | 1176.9312       | 19 | W      | 3  | 432.2605        | 216.6339        |
|         | 2451.9235       | 1226.4654       | 20 | V      | 2  | 246.1812        | 123.5942        |
|         |                 |                 | 21 | K      | 1  | 147.1128        | 74.0600         |

# Annotated spectra from Saleem et. al. 2009

K<sub>111</sub> K<sub>136</sub> T<sub>181</sub> PPS<sub>167</sub> PAK<sub>136</sub> PK<sub>136</sub> Q/2

0.8318

1e+04

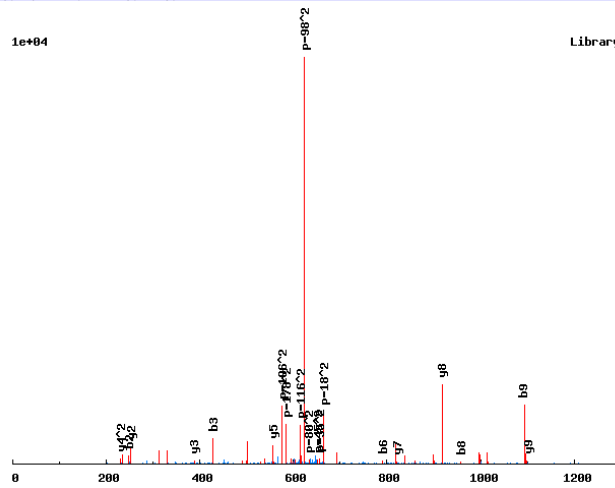

| Library | b <sup>1+</sup> | b <sup>2+</sup> | #  | AA | #     | y <sup>1+</sup> | y <sup>2+</sup>    |
|---------|-----------------|-----------------|----|----|-------|-----------------|--------------------|
|         | 112.0393        | 56.5233         | 1  | Q  | [111] | 11              |                    |
|         | 248.1485        | 124.5779        | 2  | K  | [136] | 10              | 1234.6058 617.8066 |
|         | 429.1625        | 215.0849        | 3  | T  | [181] | 9               | 1098.4967 549.7520 |
|         | 526.2152        | 263.6113        | 4  | P  |       | 8               | 917.4827 459.2450  |
|         | 623.2680        | 312.1376        | 5  | P  |       | 7               | 820.4299 410.7186  |
|         | 790.2664        | 395.6368        | 6  | S  | [167] | 6               | 723.3771 362.1922  |
|         | 887.3191        | 444.1632        | 7  | P  |       | 5               | 556.3788 278.6930  |
|         | 958.3562        | 479.6818        | 8  | A  |       | 4               | 459.3260 230.1667  |
|         | 1094.4654       | 547.7363        | 9  | K  | [136] | 3               | 388.2889 194.6481  |
|         | 1191.5182       | 596.2627        | 10 | P  |       | 2               | 252.1798 126.5935  |
|         |                 |                 | 11 | K  | [136] | 1               | 155.1270 78.0671   |

# Annotated spectra from Saleem et. al. 2009

K.Q<sub>111</sub>LALDEHDSHAILEQPSHS<sub>167</sub>TNC<sub>160</sub>SS<sub>167</sub>SNIAAMNK.G/3

0.9997

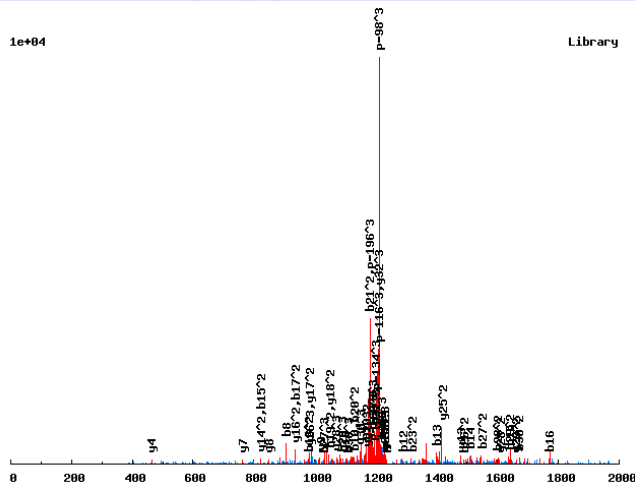

| Library | b <sup>1+</sup>  | b <sup>2+</sup>  | b <sup>3+</sup>  | #  | AA     | #  | y <sup>1+</sup>  | y <sup>2+</sup>  | y <sup>3+</sup>  |
|---------|------------------|------------------|------------------|----|--------|----|------------------|------------------|------------------|
|         | 112.0393         | 56.5233          | 38.0180          | 1  | Q[111] | 33 |                  |                  |                  |
|         | 225.1234         | 113.0653         | 75.7126          | 2  | L      | 32 | 3624.5132        | 1812.7602        | <b>1208.8426</b> |
|         | 296.1605         | 148.5839         | 99.3917          | 3  | A      | 31 | 3511.4291        | 1756.2182        | <b>1171.1479</b> |
|         | 409.2445         | 205.1259         | 137.0864         | 4  | L      | 30 | 3440.3920        | 1720.6996        | <b>1147.4688</b> |
|         | 524.2715         | 262.6394         | 175.4287         | 5  | D      | 29 | 3327.3079        | <b>1664.1576</b> | 1109.7742        |
|         | 653.3141         | 327.1607         | 218.4429         | 6  | E      | 28 | 3212.2810        | <b>1606.6441</b> | <b>1071.4318</b> |
|         | 790.3730         | 395.6901         | 264.1292         | 7  | H      | 27 | 3083.2384        | 1542.1228        | 1028.4177        |
|         | <b>905.3999</b>  | 453.2036         | 302.4715         | 8  | D      | 26 | 2946.1795        | 1473.5934        | <b>982.7313</b>  |
|         | 992.4320         | 496.7196         | 331.4822         | 9  | S      | 25 | 2831.1525        | <b>1416.0799</b> | 944.3890         |
|         | <b>1129.4909</b> | 565.2491         | 377.1685         | 10 | H      | 24 | 2744.1205        | 1372.5639        | 915.3784         |
|         | <b>1216.5229</b> | 608.7651         | 406.1792         | 11 | S      | 23 | 2607.0616        | 1304.0344        | 869.6921         |
|         | <b>1287.5600</b> | 644.2836         | 429.8582         | 12 | A      | 22 | 2520.0296        | 1260.5184        | 840.6814         |
|         | <b>1400.6441</b> | 700.8257         | 467.5529         | 13 | I      | 21 | 2448.9925        | <b>1224.9999</b> | 817.0023         |
|         | <b>1513.7281</b> | 757.3677         | 505.2476         | 14 | L      | 20 | 2335.9084        | <b>1168.4578</b> | 779.3077         |
|         | <b>1642.7707</b> | <b>821.8890</b>  | 548.2618         | 15 | E      | 19 | 2222.8243        | 1111.9158        | 741.6130         |
|         | <b>1770.8293</b> | 885.9183         | 590.9480         | 16 | Q      | 18 | 2093.7818        | <b>1047.3945</b> | 698.5988         |
|         | 1867.8821        | <b>934.4447</b>  | 623.2989         | 17 | P      | 17 | 1965.7232        | <b>983.3652</b>  | 655.9126         |
|         | 1954.9141        | <b>977.9607</b>  | 652.3095         | 18 | S      | 16 | 1868.6704        | <b>934.8388</b>  | 623.5617         |
|         | 2091.9730        | <b>1046.4901</b> | 697.9959         | 19 | H      | 15 | 1781.6384        | 891.3228         | 594.5510         |
|         | 2258.9714        | <b>1129.9893</b> | 753.6620         | 20 | S[167] | 14 | 1644.5795        | <b>822.7934</b>  | 548.8647         |
|         | 2360.0190        | <b>1180.5132</b> | 787.3445         | 21 | T      | 13 | <b>1477.5811</b> | 739.2942         | 493.1986         |
|         | 2474.0620        | 1237.5346        | 825.3588         | 22 | N      | 12 | 1376.5334        | 688.7704         | 459.5160         |
|         | 2634.0926        | <b>1317.5499</b> | 878.7024         | 23 | C[160] | 11 | 1262.4905        | 631.7489         | 421.5017         |
|         | 2721.1246        | 1361.0660        | 907.7131         | 24 | S      | 10 | <b>1102.4599</b> | 551.7336         | 368.1581         |
|         | 2888.1230        | 1444.5651        | 963.3792         | 25 | S[167] | 9  | <b>1015.4278</b> | 508.2176         | 339.1475         |
|         | 2975.1550        | <b>1488.0812</b> | 992.3899         | 26 | S      | 8  | <b>848.4295</b>  | 424.7184         | 283.4813         |
|         | 3089.1980        | <b>1545.1026</b> | <b>1030.4042</b> | 27 | N      | 7  | <b>761.3974</b>  | 381.2024         | 254.4707         |
|         | 3202.2820        | <b>1601.6447</b> | 1068.0989        | 28 | I      | 6  | 647.3545         | 324.1809         | 216.4564         |
|         | 3273.3191        | <b>1637.1632</b> | <b>1091.7779</b> | 29 | A      | 5  | 534.2704         | 267.6389         | 178.7617         |
|         | 3344.3562        | <b>1672.6818</b> | <b>1115.4569</b> | 30 | A      | 4  | <b>463.2333</b>  | 232.1203         | 155.0826         |
|         | 3475.3967        | 1738.2020        | 1159.1371        | 31 | M      | 3  | 392.1962         | 196.6017         | 131.4036         |
|         | 3589.4397        | 1795.2235        | <b>1197.1514</b> | 32 | N      | 2  | 261.1557         | 131.0815         | 87.7234          |
|         |                  |                  |                  | 33 | K      | 1  | 147.1128         | 74.0600          | 49.7091          |



# Annotated spectra from Saleem et. al. 2009

K<sub>Q111</sub>L<sub>67</sub>VANT<sub>181</sub>PSEIPDAHK<sub>136</sub>AEQEDIEK<sub>136</sub>T/3

0.9764

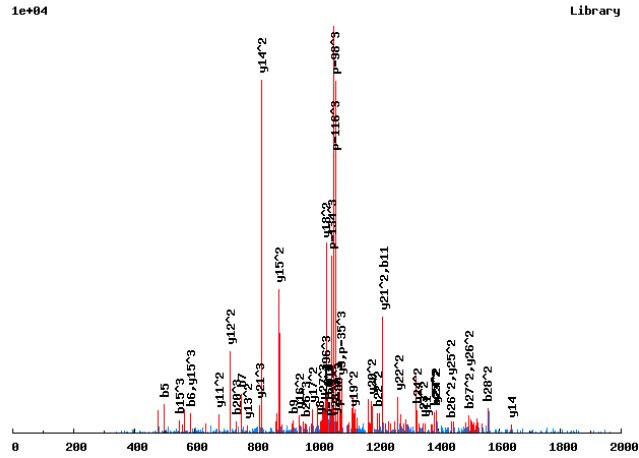

| Library | b <sup>1+</sup> | b <sup>2+</sup> | b <sup>3+</sup> | #  | AA     | #  | y <sup>1+</sup> | y <sup>2+</sup> | y <sup>3+</sup> |
|---------|-----------------|-----------------|-----------------|----|--------|----|-----------------|-----------------|-----------------|
|         | 112.0393        | 56.5233         | 38.0180         | 1  | Q[111] | 29 |                 |                 |                 |
|         | 225.1234        | 113.0653        | 75.7126         | 2  | L      | 28 | 3169.4308       | 1585.2191       | 1057.1485       |
|         | 282.1448        | 141.5761        | 94.7198         | 3  | G      | 27 | 3056.3468       | 1528.6770       | 1019.4538       |
|         | 396.1878        | 198.5975        | 132.7341        | 4  | N      | 26 | 2999.3253       | 1500.1663       | 1000.4466       |
|         | 497.2354        | 249.1214        | 166.4167        | 5  | T      | 25 | 2885.2824       | 1443.1448       | 962.4323        |
|         | 584.2675        | 292.6374        | 195.4273        | 6  | S      | 24 | 2784.2347       | 1392.6210       | 928.7497        |
|         | 751.2658        | 376.1366        | 251.0935        | 7  | S[167] | 23 | 2697.2027       | 1349.1050       | 899.7391        |
|         | 850.3342        | 425.6708        | 284.1163        | 8  | V      | 22 | 2530.2043       | 1265.6058       | 844.0730        |
|         | 921.3714        | 461.1893        | 307.7953        | 9  | A      | 21 | 2431.1359       | 1216.0716       | 811.0501        |
|         | 1035.4143       | 518.2108        | 345.8096        | 10 | N      | 20 | 2360.0988       | 1180.5530       | 787.3711        |
|         | 1216.4283       | 608.7178        | 406.1476        | 11 | T[181] | 19 | 2246.0558       | 1123.5316       | 749.3568        |
|         | 1313.4811       | 657.2442        | 438.4985        | 12 | P      | 18 | 2065.0418       | 1033.0246       | 689.0188        |
|         | 1400.5131       | 700.7602        | 467.5092        | 13 | S      | 17 | 1967.9891       | 984.4982        | 656.6679        |
|         | 1529.5557       | 765.2815        | 510.5234        | 14 | E      | 16 | 1880.9570       | 940.9822        | 627.6572        |
|         | 1642.6397       | 821.8235        | 548.2181        | 15 | I      | 15 | 1751.9145       | 876.4609        | 584.6430        |
|         | 1739.6925       | 870.3499        | 580.5690        | 16 | P      | 14 | 1638.8304       | 819.9188        | 546.9483        |
|         | 1854.7194       | 927.8634        | 618.9113        | 17 | D      | 13 | 1541.7776       | 771.3925        | 514.5974        |
|         | 1925.7565       | 963.3819        | 642.5904        | 18 | A      | 12 | 1426.7507       | 713.8790        | 476.2551        |
|         | 2062.8155       | 1031.9114       | 688.2767        | 19 | H      | 11 | 1355.7136       | 678.3604        | 452.5760        |
|         | 2198.9246       | 1099.9659       | 733.6464        | 20 | K[136] | 10 | 1218.6547       | 609.8310        | 406.8897        |
|         | 2269.9617       | 1135.4845       | 757.3254        | 21 | A      | 9  | 1082.5455       | 541.7764        | 361.5200        |
|         | 2399.0043       | 1200.0058       | 800.3396        | 22 | E      | 8  | 1011.5084       | 506.2578        | 337.8410        |
|         | 2527.0629       | 1264.0351       | 843.0258        | 23 | Q      | 7  | 882.4658        | 441.7365        | 294.8268        |
|         | 2656.1055       | 1328.5564       | 886.0400        | 24 | E      | 6  | 754.4072        | 377.7073        | 252.1406        |
|         | 2771.1324       | 1386.0699       | 924.3823        | 25 | D      | 5  | 625.3646        | 313.1860        | 209.1264        |
|         | 2884.2165       | 1442.6119       | 962.0770        | 26 | I      | 4  | 510.3377        | 255.6725        | 170.7841        |
|         | 2997.3005       | 1499.1539       | 999.7717        | 27 | I      | 3  | 397.2536        | 199.1305        | 133.0894        |
|         | 3126.3431       | 1563.6752       | 1042.7859       | 28 | E      | 2  | 284.1696        | 142.5884        | 95.3947         |
|         |                 |                 |                 | 29 | K[136] | 1  | 155.1270        | 78.0671         | 52.3805         |

# Annotated spectra from Saleem et. al. 2009

K.LQGGNS<sub>167</sub>KPVK.N/2

0.694

1e+04

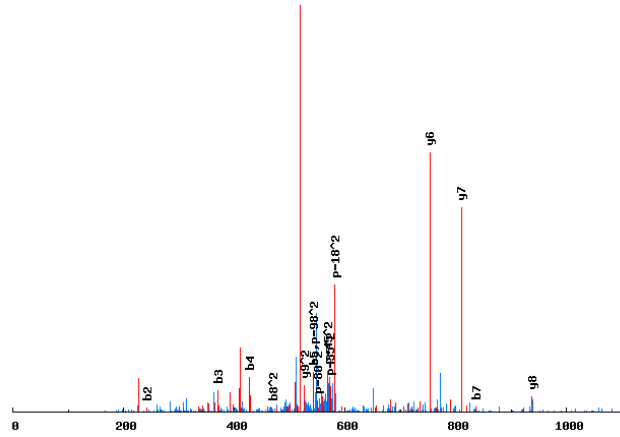

| Library | b <sup>1+</sup> | b <sup>2+</sup> | #               | AA | #  | y <sup>1+</sup> | y <sup>2+</sup> |
|---------|-----------------|-----------------|-----------------|----|----|-----------------|-----------------|
|         | 129.0659        | 65.0366         | 1               | Q  | 10 |                 |                 |
|         | <b>242.1499</b> | 121.5786        | 2               | L  | 9  | 1050.5343       | <b>525.7708</b> |
|         | <b>370.2085</b> | 185.6079        | 3               | Q  | 8  | <b>937.4503</b> | 469.2288        |
|         | <b>427.2300</b> | 214.1186        | 4               | G  | 7  | <b>809.3917</b> | 405.1995        |
|         | <b>541.2729</b> | 271.1401        | 5               | N  | 6  | <b>752.3702</b> | 376.6888        |
|         | 708.2713        | 354.6393        | <b>6 S[167]</b> |    | 5  | 638.3273        | 319.6673        |
|         | <b>836.3662</b> | 418.6867        | 7               | K  | 4  | 471.3289        | 236.1681        |
|         | 933.4190        | <b>467.2131</b> | 8               | P  | 3  | 343.2340        | 172.1206        |
|         | 1032.4874       | 516.7473        | 9               | V  | 2  | 246.1812        | 123.5942        |
|         |                 |                 | 10              | K  | 1  | 147.1128        | 74.0600         |

# Annotated spectra from Saleem et. al. 2009

R.Q<sub>111</sub>LT<sub>181</sub>ITS<sub>167</sub>GK<sub>136</sub>NIEK<sub>136</sub>D/2

0.7436

1e+04

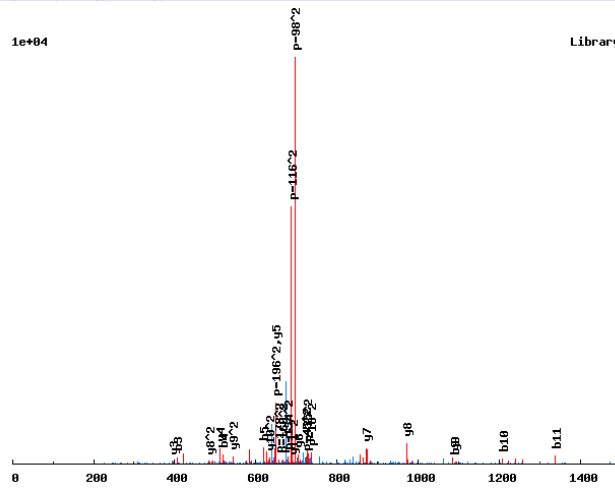

| Library | b <sup>1+</sup> | b <sup>2+</sup> | #  | AA | #     | y <sup>1+</sup> | y <sup>2+</sup>    |
|---------|-----------------|-----------------|----|----|-------|-----------------|--------------------|
|         | 112.0393        | 56.5233         | 1  | Q  | [111] | 12              |                    |
|         | 225.1234        | 113.0653        | 2  | L  | 11    | 1379.6554       | 690.3313           |
|         | 406.1374        | 203.5723        | 3  | T  | [181] | 10              | 1266.5713 633.7893 |
|         | 519.2214        | 260.1144        | 4  | I  | 9     | 1085.5573       | 543.2823           |
|         | 620.2691        | 310.6382        | 5  | T  | 8     | 972.4732        | 486.7403           |
|         | 787.2675        | 394.1374        | 6  | S  | [167] | 7               | 871.4256 436.2164  |
|         | 844.2889        | 422.6481        | 7  | G  | 6     | 704.4272        | 352.7172           |
|         | 980.3981        | 490.7027        | 8  | K  | [136] | 5               | 647.4057 324.2065  |
|         | 1094.4410       | 547.7242        | 9  | N  | 4     | 511.2966        | 256.1519           |
|         | 1207.5251       | 604.2662        | 10 | I  | 3     | 397.2536        | 199.1305           |
|         | 1336.5677       | 668.7875        | 11 | E  | 2     | 284.1696        | 142.5884           |
|         |                 |                 | 12 | K  | [136] | 1               | 155.1270 78.0671   |

# Annotated spectra from Saleem et. al. 2009

R.Q<sub>111</sub>NS<sub>167</sub>NNINPLDAGPS<sub>167</sub>FSP<sub>167</sub>LHK.K/3

0.9893

1e+04

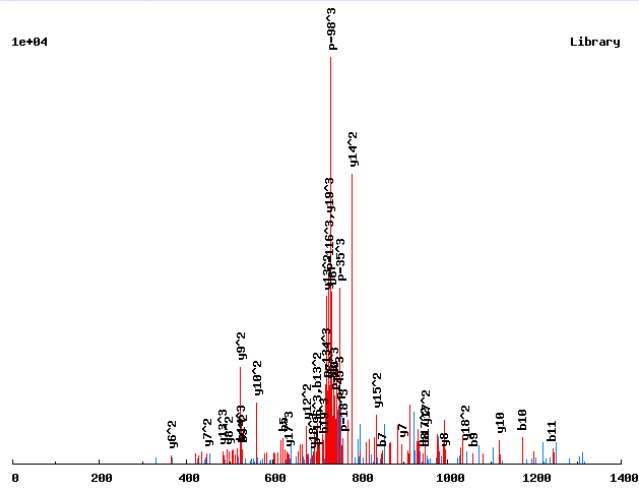

| Library | b <sup>1+</sup> | b <sup>2+</sup> | b <sup>3+</sup> | #  | AA     | #  | y <sup>1+</sup> | y <sup>2+</sup> | y <sup>3+</sup> |
|---------|-----------------|-----------------|-----------------|----|--------|----|-----------------|-----------------|-----------------|
|         | 112.0393        | 56.5233         | 38.0180         | 1  | Q[111] | 20 |                 |                 |                 |
|         | 226.0822        | 113.5448        | 76.0323         | 2  | N      | 19 | 2181.9366       | 1091.4719       | 727.9837        |
|         | 393.0806        | 197.0439        | 131.6984        | 3  | S[167] | 18 | 2067.8936       | 1034.4505       | 689.9694        |
|         | 507.1235        | 254.0654        | 169.7127        | 4  | N      | 17 | 1900.8953       | 950.9513        | 634.3033        |
|         | 621.1665        | 311.0869        | 207.7270        | 5  | N      | 16 | 1786.8523       | 893.9298        | 596.2890        |
|         | 734.2505        | 367.6289        | 245.4217        | 6  | I      | 15 | 1672.8094       | 836.9083        | 558.2747        |
|         | 848.2935        | 424.6504        | 283.4360        | 7  | N      | 14 | 1559.7254       | 780.3663        | 520.5800        |
|         | 945.3462        | 473.1767        | 315.7869        | 8  | P      | 13 | 1445.6824       | 723.3449        | 482.5657        |
|         | 1058.4303       | 529.7188        | 353.4816        | 9  | L      | 12 | 1348.6297       | 674.8185        | 450.2147        |
|         | 1173.4572       | 587.2322        | 391.8239        | 10 | D      | 11 | 1235.5456       | 618.2764        | 412.5201        |
|         | 1244.4943       | 622.7508        | 415.5030        | 11 | A      | 10 | 1120.5187       | 560.7630        | 374.1777        |
|         | 1301.5158       | 651.2615        | 434.5101        | 12 | G      | 9  | 1049.4816       | 525.2444        | 350.4987        |
|         | 1398.5685       | 699.7879        | 466.8610        | 13 | P      | 8  | 992.4601        | 496.7337        | 331.4916        |
|         | 1565.5669       | 783.2871        | 522.5272        | 14 | S[167] | 7  | 895.4073        | 448.2073        | 299.1406        |
|         | 1712.6353       | 856.8213        | 571.5500        | 15 | F      | 6  | 728.4090        | 364.7081        | 243.4745        |
|         | 1799.6673       | 900.3373        | 600.5606        | 16 | S      | 5  | 581.3406        | 291.1739        |                 |

# Annotated spectra from Saleem et. al. 2009

R.Q<sub>111</sub>PPVSTST<sub>181</sub>NS<sub>167</sub>LSLDQR.S/2

0.9881

1e+04

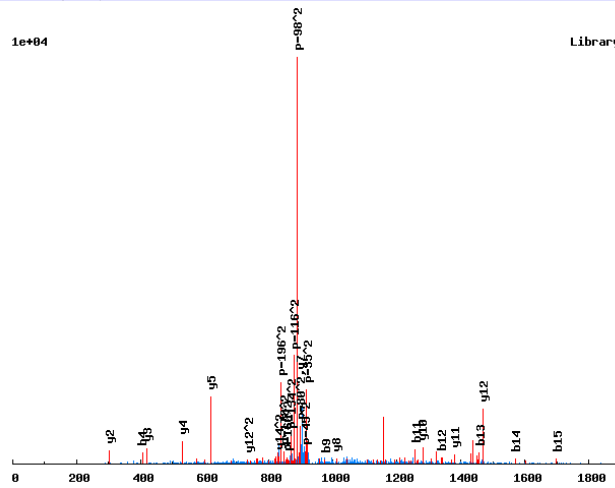

| Library | b <sup>1+</sup> | b <sup>2+</sup> | #  | AA | #     | y <sup>1+</sup> | y <sup>2+</sup> |          |
|---------|-----------------|-----------------|----|----|-------|-----------------|-----------------|----------|
|         | 112.0393        | 56.5233         | 1  | Q  | [111] | 16              |                 |          |
|         | 209.0921        | 105.0497        | 2  | P  | 15    | 1761.7456       | 881.3764        |          |
|         | 306.1448        | 153.5761        | 3  | P  | 14    | 1664.6928       | 832.8501        |          |
|         | 405.2132        | 203.1103        | 4  | V  | 13    | 1567.6401       | 784.3237        |          |
|         | 492.2453        | 246.6263        | 5  | S  | 12    | 1468.5717       | 734.7895        |          |
|         | 593.2930        | 297.1501        | 6  | T  | 11    | 1381.5396       | 691.2735        |          |
|         | 680.3250        | 340.6661        | 7  | S  | 10    | 1280.4920       | 640.7496        |          |
|         | 861.3390        | 431.1731        | 8  | T  | [181] | 9               | 1193.4599       | 597.2336 |
|         | 975.3819        | 488.1946        | 9  | N  | 8     | 1012.4459       | 506.7266        |          |
|         | 1142.3803       | 571.6938        | 10 | S  | [167] | 7               | 898.4030        | 449.7051 |
|         | 1255.4643       | 628.2358        | 11 | L  | 6     | 731.4046        | 366.2060        |          |
|         | 1342.4964       | 671.7518        | 12 | S  | 5     | 618.3206        | 309.6639        |          |
|         | 1455.5804       | 728.2939        | 13 | L  | 4     | 531.2885        | 266.1479        |          |
|         | 1570.6074       | 785.8073        | 14 | D  | 3     | 418.2045        | 209.6059        |          |
|         | 1698.6660       | 849.8366        | 15 | Q  | 2     | 303.1775        | 152.0924        |          |
|         |                 |                 | 16 | R  | 1     | 175.1190        | 88.0631         |          |

# Annotated spectra from Saleem et. al. 2009

R.QS<sub>167</sub>IS<sub>167</sub>PILSNATTTTK<sub>136</sub>S/2

0.9074

1e+04

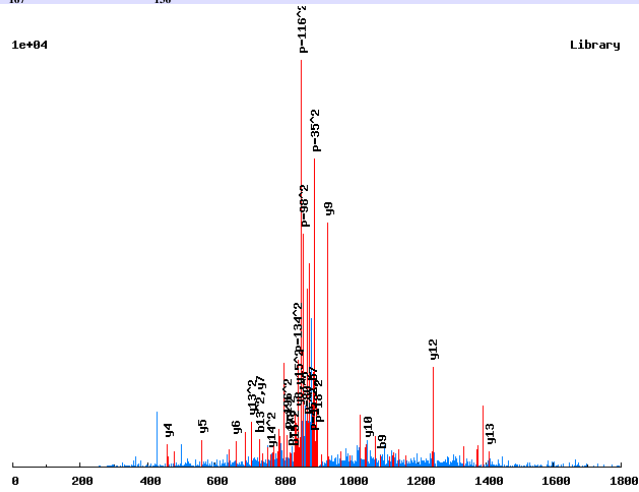

| Library | b <sup>1+</sup> | b <sup>2+</sup> | #  | AA     | #  | y <sup>1+</sup> | y <sup>2+</sup> |
|---------|-----------------|-----------------|----|--------|----|-----------------|-----------------|
|         | 129.0659        | 65.0366         | 1  | Q      | 16 |                 |                 |
|         | 296.0642        | 148.5358        | 2  | S[167] | 15 | 1690.7428       | 845.8750        |
|         | 409.1483        | 205.0778        | 3  | I      | 14 | 1523.7444       | 762.3758        |
|         | 576.1466        | 288.5770        | 4  | S[167] | 13 | 1410.6603       | 705.8338        |
|         | 673.1994        | 337.1033        | 5  | P      | 12 | 1243.6620       | 622.3346        |
|         | 774.2471        | 387.6272        | 6  | T      | 11 | 1146.6092       | 573.8082        |
|         | 887.3311        | 444.1692        | 7  | L      | 10 | 1045.5615       | 523.2844        |
|         | 974.3632        | 487.6852        | 8  | S      | 9  | 932.4775        | 466.7424        |
|         | 1088.4061       | 544.7067        | 9  | N      | 8  | 845.4454        | 423.2264        |
|         | 1159.4432       | 580.2252        | 10 | A      | 7  | 731.4025        | 366.2049        |
|         | 1260.4909       | 630.7491        | 11 | T      | 6  | 660.3654        | 330.6863        |
|         | 1361.5386       | 681.2729        | 12 | T      | 5  | 559.3177        | 280.1625        |
|         | 1462.5863       | 731.7968        | 13 | T      | 4  | 458.2700        | 229.6387        |
|         | 1563.6339       | 782.3206        | 14 | T      | 3  | 357.2224        | 179.1148        |
|         | 1664.6816       | 832.8444        | 15 | T      | 2  | 256.1747        | 128.5910        |
|         |                 |                 | 16 | K[136] | 1  | 155.1270        | 78.0671         |

# Annotated spectra from Saleem et. al. 2009

K<sub>111</sub>SKVS<sub>167</sub>DDS<sub>167</sub>ESESGDKEATPLIQR.K/3

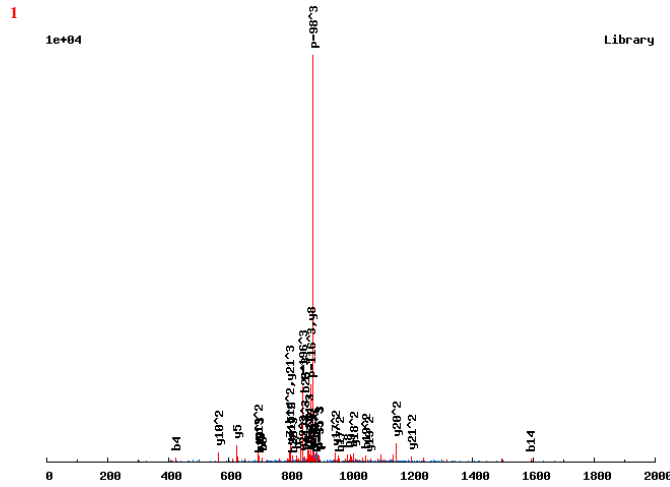

| Library | b <sup>1+</sup> | b <sup>2+</sup> | b <sup>3+</sup> | #  | AA     | #  | y <sup>1+</sup> | y <sup>2+</sup> | y <sup>3+</sup> |
|---------|-----------------|-----------------|-----------------|----|--------|----|-----------------|-----------------|-----------------|
|         | 112.0393        | 56.5233         | 38.0180         | 1  | Q[111] | 24 |                 |                 |                 |
|         | 199.0713        | 100.0393        | 67.0286         | 2  | S      | 23 | 2609.1015       | 1305.0544       | 870.3720        |
|         | 327.1663        | 164.0868        | 109.7270        | 3  | K      | 22 | 2522.0695       | 1261.5384       | 841.3613        |
|         | 426.2347        | 213.6210        | 142.7498        | 4  | V      | 21 | 2393.9745       | 1197.4909       | 798.6630        |
|         | 593.2331        | 297.1202        | 198.4159        | 5  | S[167] | 20 | 2294.9061       | 1147.9567       | 765.6402        |
|         | 708.2600        | 354.6336        | 236.7582        | 6  | D      | 19 | 2127.9077       | 1064.4575       | 709.9741        |
|         | 823.2870        | 412.1471        | 275.1005        | 7  | D      | 18 | 2012.8808       | 1006.9440       | 671.6318        |
|         | 990.2853        | 495.6463        | 330.7666        | 8  | S[167] | 17 | 1897.8539       | 949.4306        | 633.2895        |
|         | 1119.3279       | 560.1676        | 373.7808        | 9  | E      | 16 | 1730.8555       | 865.9314        | 577.6234        |
|         | 1206.3599       | 603.6836        | 402.7915        | 10 | S      | 15 | 1601.8129       | 801.4101        | 534.6092        |
|         | 1335.4025       | 668.2049        | 445.8057        | 11 | E      | 14 | 1514.7809       | 757.8941        | 505.5985        |
|         | 1422.4346       | 711.7209        | 474.8164        | 12 | S      | 13 | 1385.7383       | 693.3728        | 462.5843        |
|         | 1479.4560       | 740.2316        | 493.8235        | 13 | G      | 12 | 1298.7063       | 649.8568        | 433.5736        |
|         | 1594.4830       | 797.7451        | 532.1658        | 14 | D      | 11 | 1241.6848       | 621.3460        | 414.5665        |
|         | 1722.5779       | 861.7926        | 574.8642        | 15 | K      | 10 | 1126.6579       | 563.8326        | 376.2241        |
|         | 1851.6205       | 926.3139        | 617.8784        | 16 | E      | 9  | 998.5629        | 499.7851        | 333.5258        |
|         | 1922.6576       | 961.8324        | 641.5574        | 17 | A      | 8  | 869.5203        | 435.2638        | 290.5116        |
|         | 2023.7053       | 1012.3563       | 675.2400        | 18 | T      | 7  | 798.4832        | 399.7452        | 266.8326        |
|         | 2094.7424       | 1047.8748       | 698.9190        | 19 | A      | 6  | 697.4355        | 349.2214        | 233.1500        |
|         | 2191.7952       | 1096.4012       | 731.2699        | 20 | P      | 5  | 626.3984        | 313.7028        | 209.4710        |
|         | 2304.8792       | 1152.9433       | 768.9646        | 21 | L      | 4  | 529.3457        | 265.1765        | 177.1201        |
|         | 2417.9633       | 1209.4853       | 806.6593        | 22 | I      | 3  | 416.2616        | 208.6344        | 139.4254        |
|         | 2546.0219       | 1273.5146       | 849.3455        | 23 | Q      | 2  | 303.1775        | 152.0924        | 101.7307        |
|         |                 |                 |                 | 24 | R      | 1  | 175.1190        | 88.0631         | 59.0445         |





# Annotated spectra from Saleem et. al. 2009

K.QS<sub>167</sub>LNSKEK.E/3

0.6367

1e+04

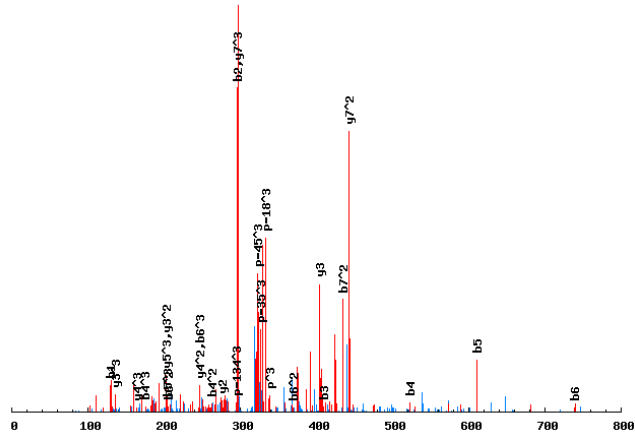

| Library | b <sup>1+</sup> | b <sup>2+</sup> | b <sup>3+</sup> | # | AA     | # | y <sup>1+</sup> | y <sup>2+</sup> | y <sup>3+</sup> |
|---------|-----------------|-----------------|-----------------|---|--------|---|-----------------|-----------------|-----------------|
|         | 129.0659        | 65.0366         | 43.6935         | 1 | Q      | 8 |                 |                 |                 |
|         | 296.0642        | 148.5358        | 99.3596         | 2 | S[167] | 7 | 885.4077        | 443.2075        | 295.8074        |
|         | 409.1483        | 205.0778        | 137.0543        | 3 | L      | 6 | 718.4094        | 359.7083        | 240.1413        |
|         | 523.1912        | 262.0992        | 175.0686        | 4 | N      | 5 | 605.3253        | 303.1663        | 202.4466        |
|         | 610.2232        | 305.6153        | 204.0793        | 5 | S      | 4 | 491.2824        | 246.1448        | 164.4323        |
|         | 738.3182        | 369.6627        | 246.7776        | 6 | K      | 3 | 404.2503        | 202.6288        | 135.4216        |
|         | 867.3608        | 434.1840        | 289.7918        | 7 | E      | 2 | 276.1554        | 138.5813        | 92.7233         |
|         |                 |                 |                 | 8 | K      | 1 | 147.1128        | 74.0600         | 49.7091         |

# Annotated spectra from Saleem et. al. 2009

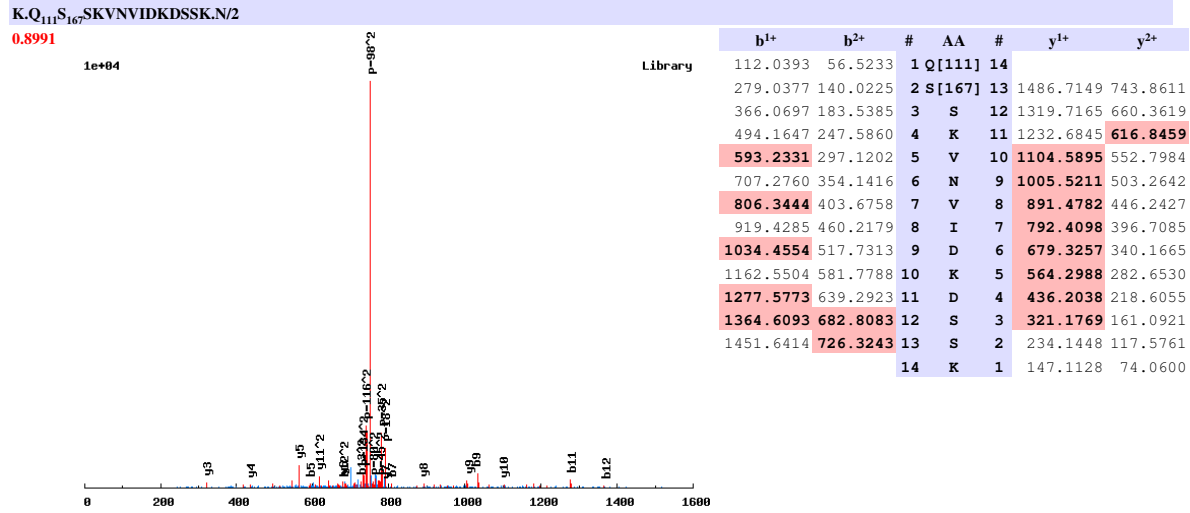

# Annotated spectra from Saleem et. al. 2009

K.QSTS<sub>167</sub>SAVS<sub>167</sub>LSTK.N/2

0.8622

1e+04

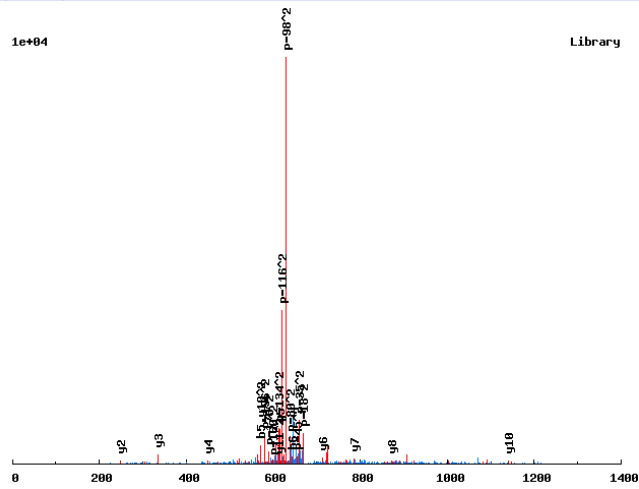

| Library | b <sup>1+</sup> | b <sup>2+</sup> | #  | AA     | #  | y <sup>1+</sup> | y <sup>2+</sup> |
|---------|-----------------|-----------------|----|--------|----|-----------------|-----------------|
|         | 129.0659        | 65.0366         | 1  | Q      | 12 |                 |                 |
|         | 216.0979        | 108.5526        | 2  | S      | 11 | 1227.4906       | 614.2489        |
|         | 317.1456        | 159.0764        | 3  | T      | 10 | 1140.4585       | 570.7329        |
|         | 484.1439        | 242.5756        | 4  | S[167] | 9  | 1039.4108       | 520.2091        |
|         | 571.1760        | 286.0916        | 5  | S      | 8  | 872.4125        | 436.7099        |
|         | 642.2131        | 321.6102        | 6  | A      | 7  | 785.3805        | 393.1939        |
|         | 741.2815        | 371.1444        | 7  | V      | 6  | 714.3433        | 357.6753        |
|         | 908.2798        | 454.6436        | 8  | S[167] | 5  | 615.2749        | 308.1411        |
|         | 1021.3639       | 511.1856        | 9  | L      | 4  | 448.2766        | 224.6419        |
|         | 1108.3959       | 554.7016        | 10 | S      | 3  | 335.1925        | 168.0999        |
|         | 1209.4436       | 605.2254        | 11 | T      | 2  | 248.1605        | 124.5839        |
|         |                 |                 | 12 | K      | 1  | 147.1128        | 74.0600         |

# Annotated spectra from Saleem et. al. 2009

K<sub>1</sub>QST<sub>181</sub>S<sub>167</sub>S<sub>167</sub>AVS<sub>167</sub>LS<sub>167</sub>T<sub>181</sub>K<sub>1</sub>N/3

0.8695

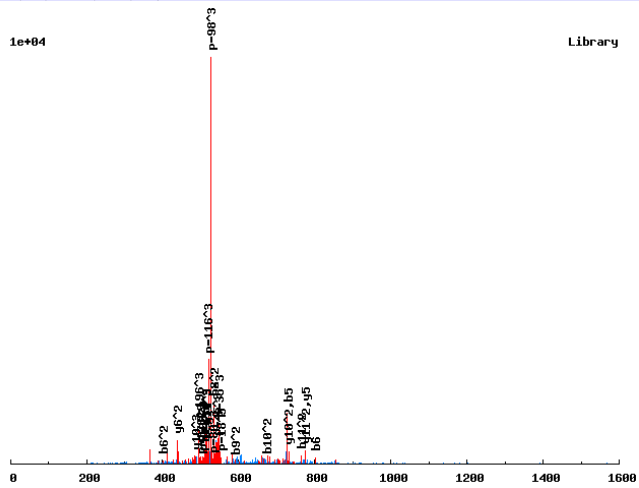

| Library | b <sup>1+</sup> | b <sup>2+</sup> | b <sup>3+</sup> | #  | AA     | #  | y <sup>1+</sup> | y <sup>2+</sup> | y <sup>3+</sup> |
|---------|-----------------|-----------------|-----------------|----|--------|----|-----------------|-----------------|-----------------|
|         | 129.0659        | 65.0366         | 43.6935         | 1  | Q      | 12 |                 |                 |                 |
|         | 216.0979        | 108.5526        | 72.7042         | 2  | S      | 11 | 1547.3559       | <b>774.1816</b> | <b>516.4568</b> |
|         | 397.1119        | 199.0596        | 133.0422        | 3  | T[181] | 10 | 1460.3238       | <b>730.6656</b> | <b>487.4461</b> |
|         | 564.1103        | 282.5588        | 188.7083        | 4  | S[167] | 9  | 1279.3098       | 640.1586        | 427.1081        |
|         | <b>731.1086</b> | 366.0580        | 244.3744        | 5  | S[167] | 8  | 1112.3115       | 556.6594        | 371.4420        |
|         | <b>802.1457</b> | <b>401.5765</b> | 268.0534        | 6  | A      | 7  | 945.3131        | 473.1602        | 315.7759        |
|         | 901.2141        | 451.1107        | 301.0762        | 7  | V      | 6  | 874.2760        | <b>437.6416</b> | 292.0969        |
|         | 1068.2125       | <b>534.6099</b> | 356.7424        | 8  | S[167] | 5  | <b>775.2076</b> | 388.1074        | 259.0741        |
|         | 1181.2966       | <b>591.1519</b> | 394.4370        | 9  | L      | 4  | 608.2092        | 304.6083        | 203.4079        |
|         | 1348.2949       | <b>674.6511</b> | 450.1032        | 10 | S[167] | 3  | 495.1252        | 248.0662        | 165.7132        |
|         | 1529.3089       | <b>765.1581</b> | <b>510.4412</b> | 11 | T[181] | 2  | 328.1268        | 164.5670        | 110.0471        |
|         |                 |                 |                 | 12 | K      | 1  | 147.1128        | 74.0600         | 49.7091         |



# Annotated spectra from Saleem et. al. 2009

K<sub>111</sub>THS<sub>167</sub>MAELKR.F/2

0.9934

1e+04

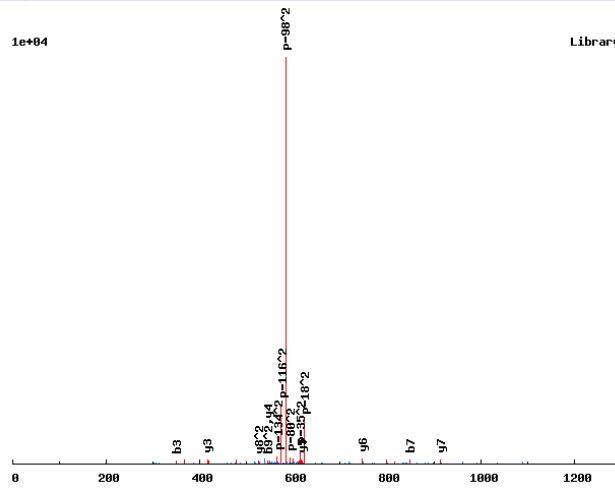

| Library | b <sup>1+</sup> | b <sup>2+</sup> | #  | AA     | #  | y <sup>1+</sup> | y <sup>2+</sup> |
|---------|-----------------|-----------------|----|--------|----|-----------------|-----------------|
|         | 112.0393        | 56.5233         | 1  | Q[111] | 10 |                 |                 |
|         | 213.0870        | 107.0471        | 2  | T      | 9  | 1152.5231       | 576.7652        |
|         | 350.1459        | 175.5766        | 3  | H      | 8  | 1051.4754       | 526.2414        |
|         | 517.1443        | 259.0758        | 4  | S[167] | 7  | 914.4165        | 457.7119        |
|         | 648.1848        | 324.5960        | 5  | M      | 6  | 747.4182        | 374.2127        |
|         | 719.2219        | 360.1146        | 6  | A      | 5  | 616.3777        | 308.6925        |
|         | 848.2645        | 424.6359        | 7  | E      | 4  | 545.3406        | 273.1739        |
|         | 961.3485        | 481.1779        | 8  | L      | 3  | 416.2980        | 208.6526        |
|         | 1089.4435       | 545.2254        | 9  | K      | 2  | 303.2139        | 152.1106        |
|         |                 |                 | 10 | R      | 1  | 175.1190        | 88.0631         |

# Annotated spectra from Saleem et. al. 2009

K<sub>111</sub>T<sub>181</sub>HS<sub>167</sub>M<sub>147</sub>AEK<sub>136</sub>R<sub>166</sub>F/2

0.8372

1e+04

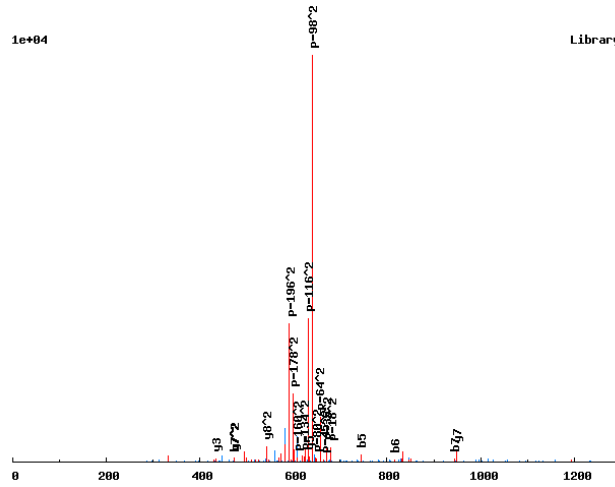

| Library | b <sup>1+</sup> | b <sup>2+</sup> | #  | AA | #     | y <sup>1+</sup> | y <sup>2+</sup>    |
|---------|-----------------|-----------------|----|----|-------|-----------------|--------------------|
|         | 112.0393        | 56.5233         | 1  | Q  | [111] | 10              |                    |
|         | 293.0533        | 147.0303        | 2  | T  | [181] | 9               | 1266.5068 633.7570 |
|         | 430.1122        | 215.5598        | 3  | H  | 8     | 1085.4928       | 543.2500           |
|         | 597.1106        | 299.0589        | 4  | S  | [167] | 7               | 948.4339 474.7206  |
|         | 744.1460        | 372.5766        | 5  | M  | [147] | 6               | 781.4355 391.2214  |
|         | 815.1831        | 408.0952        | 6  | A  | 5     | 634.4001        | 317.7037           |
|         | 944.2257        | 472.6165        | 7  | E  | 4     | 563.3630        | 282.1852           |
|         | 1057.3098       | 529.1585        | 8  | L  | 3     | 434.3204        | 217.6639           |
|         | 1193.4189       | 597.2131        | 9  | K  | [136] | 2               | 321.2364 161.1218  |
|         |                 |                 | 10 | R  | [166] | 1               | 185.1272 93.0672   |





# Annotated spectra from Saleem et. al. 2009

R.Q<sub>111</sub>T<sub>181</sub>SQDS<sub>167</sub>HKHLDEQEK.N/2

0.9515

1e+04

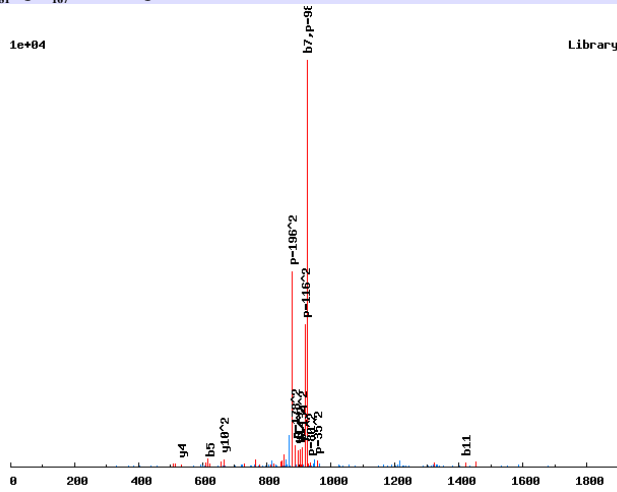

| Library | b <sup>1+</sup> | b <sup>2+</sup> | #  | AA | #     | y <sup>1+</sup> | y <sup>2+</sup>    |
|---------|-----------------|-----------------|----|----|-------|-----------------|--------------------|
|         | 112.0393        | 56.5233         | 1  | Q  | [111] | 15              |                    |
|         | 293.0533        | 147.0303        | 2  | T  | [181] | 14              | 1841.7103 921.3588 |
|         | 380.0854        | 190.5463        | 3  | S  |       | 13              | 1660.6963 830.8518 |
|         | 508.1439        | 254.5756        | 4  | Q  |       | 12              | 1573.6642 787.3358 |
|         | 623.1709        | 312.0891        | 5  | D  |       | 11              | 1445.6056 723.3065 |
|         | 790.1692        | 395.5883        | 6  | S  | [167] | 10              | 1330.5787 665.7930 |
|         | 927.2281        | 464.1177        | 7  | H  |       | 9               | 1163.5803 582.2938 |
|         | 1055.3231       | 528.1652        | 8  | K  |       | 8               | 1026.5214 513.7644 |
|         | 1192.3820       | 596.6946        | 9  | H  |       | 7               | 898.4265 449.7169  |
|         | 1305.4661       | 653.2367        | 10 | L  |       | 6               | 761.3676 381.1874  |
|         | 1420.4930       | 710.7501        | 11 | D  |       | 5               | 648.2835 324.6454  |
|         | 1549.5356       | 775.2714        | 12 | E  |       | 4               | 533.2566 267.1319  |
|         | 1677.5942       | 839.3007        | 13 | Q  |       | 3               | 404.2140 202.6106  |
|         | 1806.6368       | 903.8220        | 14 | E  |       | 2               | 276.1554 138.5813  |
|         |                 |                 | 15 | K  |       | 1               | 147.1128 74.0600   |

# Annotated spectra from Saleem et. al. 2009

R.Q<sub>111</sub>T<sub>181</sub>SSTS<sub>167</sub>LK<sub>136</sub>NDLELTDSR<sub>166</sub>V/2

0.9286

1e+04

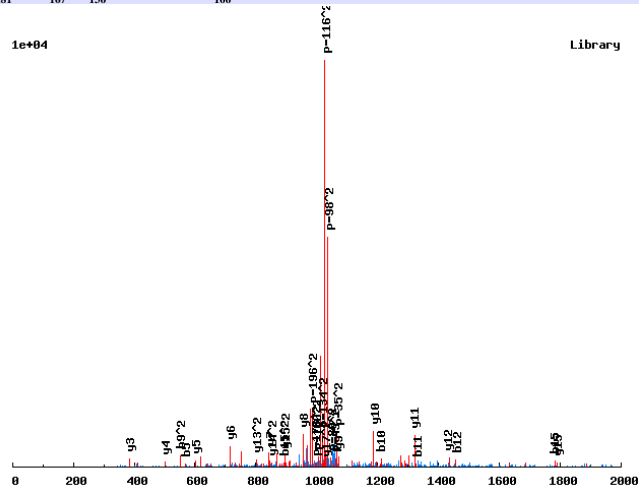

| Library | b <sup>1+</sup> | b <sup>2+</sup> | #  | AA | #     | y <sup>1+</sup> | y <sup>2+</sup>     |
|---------|-----------------|-----------------|----|----|-------|-----------------|---------------------|
|         | 112.0393        | 56.5233         | 1  | Q  | [111] | 18              |                     |
|         | 293.0533        | 147.0303        | 2  | T  | [181] | 17              | 2057.9158 1029.4616 |
|         | 380.0854        | 190.5463        | 3  | S  | 16    | 1876.9018       | 938.9546            |
|         | 467.1174        | 234.0623        | 4  | S  | 15    | 1789.8698       | 895.4385            |
|         | 568.1651        | 284.5862        | 5  | T  | 14    | 1702.8378       | 851.9225            |
|         | 735.1634        | 368.0854        | 6  | S  | [167] | 13              | 1601.7901 801.3987  |
|         | 848.2475        | 424.6274        | 7  | L  | 12    | 1434.7917       | 717.8995            |
|         | 984.3566        | 492.6820        | 8  | K  | [136] | 11              | 1321.7077 661.3575  |
|         | 1098.3996       | 549.7034        | 9  | N  | 10    | 1185.5985       | 593.3029            |
|         | 1213.4265       | 607.2169        | 10 | D  | 9     | 1071.5556       | 536.2814            |
|         | 1326.5106       | 663.7589        | 11 | L  | 8     | 956.5286        | 478.7680            |
|         | 1455.5532       | 728.2802        | 12 | E  | 7     | 843.4446        | 422.2259            |
|         | 1568.6372       | 784.8223        | 13 | L  | 6     | 714.4020        | 357.7046            |
|         | 1669.6849       | 835.3461        | 14 | T  | 5     | 601.3179        | 301.1626            |
|         | 1784.7118       | 892.8596        | 15 | D  | 4     | 500.2702        | 250.6388            |
|         | 1897.7959       | 949.4016        | 16 | L  | 3     | 385.2433        | 193.1253            |
|         | 1984.8279       | 992.9176        | 17 | S  | 2     | 272.1592        | 136.5833            |
|         |                 |                 | 18 | R  | [166] | 1               | 185.1272 93.0672    |



# Annotated spectra from Saleem et. al. 2009

R.Q<sub>111</sub>YESSSGASNGLDGT<sub>181</sub>SGVT<sub>181</sub>R.D/3

0.7574

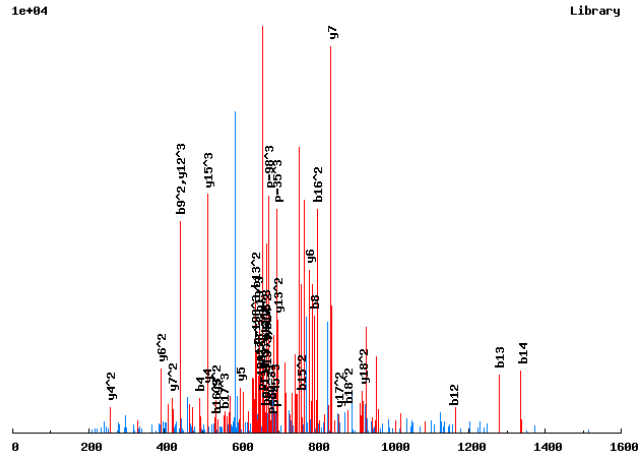

| Library | b <sup>1+</sup> | b <sup>2+</sup> | b <sup>3+</sup> | #  | AA     | #  | y <sup>1+</sup> | y <sup>2+</sup> | y <sup>3+</sup> |
|---------|-----------------|-----------------|-----------------|----|--------|----|-----------------|-----------------|-----------------|
|         | 112.0393        | 56.5233         | 38.0180         | 1  | Q[111] | 20 |                 |                 |                 |
|         | 275.1026        | 138.0550        | 92.3724         | 2  | Y      | 19 | 2004.7583       | 1002.8828       | 668.9243        |
|         | 404.1452        | 202.5763        | 135.3866        | 3  | E      | 18 | 1841.6950       | 921.3511        | 614.5699        |
|         | 491.1773        | 246.0923        | 164.3973        | 4  | S      | 17 | 1712.6524       | 856.8298        | 571.5557        |
|         | 578.2093        | 289.6083        | 193.4080        | 5  | S      | 16 | 1625.6204       | 813.3138        | 542.5450        |
|         | 665.2413        | 333.1243        | 222.4186        | 6  | S      | 15 | 1538.5884       | 769.7978        | 513.5343        |
|         | 722.2628        | 361.6350        | 241.4258        | 7  | G      | 14 | 1451.5563       | 726.2818        | 484.5236        |
|         | 793.2999        | 397.1536        | 265.1048        | 8  | A      | 13 | 1394.5349       | 697.7711        | 465.5165        |
|         | 880.3319        | 440.6696        | 294.1155        | 9  | S      | 12 | 1323.4978       | 662.2525        | 441.8374        |
|         | 994.3749        | 497.6911        | 332.1298        | 10 | N      | 11 | 1236.4657       | 618.7365        | 412.8268        |
|         | 1051.3963       | 526.2018        | 351.1370        | 11 | G      | 10 | 1122.4228       | 561.7150        | 374.8125        |
|         | 1164.4804       | 582.7438        | 388.8316        | 12 | L      | 9  | 1065.4013       | 533.2043        | 355.8053        |
|         | 1279.5073       | 640.2573        | 427.1740        | 13 | D      | 8  | 952.3173        | 476.6623        | 318.1106        |
|         | 1336.5288       | 668.7680        | 446.1811        | 14 | G      | 7  | 837.2903        | 419.1488        | 279.7683        |
|         | 1517.5428       | 759.2750        | 506.5191        | 15 | T[181] | 6  | 780.2689        | 390.6381        | 260.7611        |
|         | 1604.5748       | 802.7910        | 535.5298        | 16 | S      | 5  | 599.2549        | 300.1311        | 200.4231        |
|         | 1661.5963       | 831.3018        | 554.5369        | 17 | G      | 4  | 512.2228        | 256.6151        | 171.4125        |
|         | 1760.6647       | 880.8360        | 587.5597        | 18 | V      | 3  | 455.2014        | 228.1043        | 152.4053        |
|         | 1941.6787       | 971.3430        | 647.8978        | 19 | T[181] | 2  | 356.1330        | 178.5701        | 119.3825        |
|         |                 |                 |                 | 20 | R      | 1  | 175.1190        | 88.0631         | 59.0445         |

# Annotated spectra from Saleem et. al. 2009

R.QYFDS<sub>167</sub>GDYALKK.A/2

0.9979

1e+04

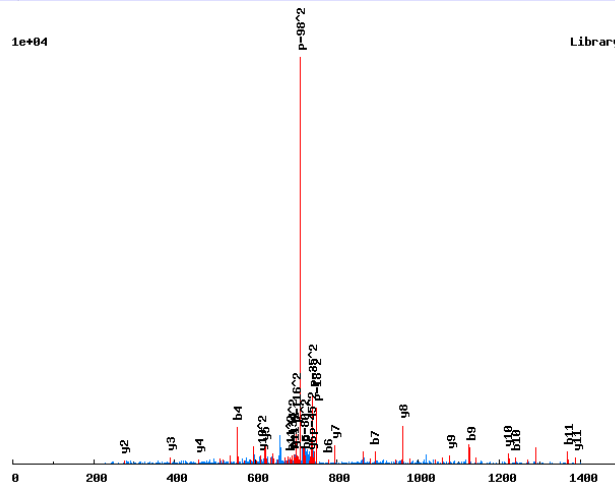

| Library | b <sup>1+</sup> | b <sup>2+</sup> | #  | AA     | #  | y <sup>1+</sup> | y <sup>2+</sup> |
|---------|-----------------|-----------------|----|--------|----|-----------------|-----------------|
|         | 129.0659        | 65.0366         | 1  | Q      | 12 |                 |                 |
|         | 292.1292        | 146.5682        | 2  | Y      | 11 | 1386.5977       | 693.8025        |
|         | 439.1976        | 220.1024        | 3  | F      | 10 | 1223.5344       | 612.2708        |
|         | 554.2245        | 277.6159        | 4  | D      | 9  | 1076.4660       | 538.7366        |
|         | 721.2229        | 361.1151        | 5  | S[167] | 8  | 961.4390        | 481.2232        |
|         | 778.2444        | 389.6258        | 6  | G      | 7  | 794.4407        | 397.7240        |
|         | 893.2713        | 447.1393        | 7  | D      | 6  | 737.4192        | 369.2132        |
|         | 1056.3346       | 528.6710        | 8  | Y      | 5  | 622.3923        | 311.6998        |
|         | 1127.3717       | 564.1895        | 9  | A      | 4  | 459.3289        | 230.1681        |
|         | 1240.4558       | 620.7315        | 10 | L      | 3  | 388.2918        | 194.6495        |
|         | 1368.5508       | 684.7790        | 11 | K      | 2  | 275.2078        | 138.1075        |
|         |                 |                 | 12 | K      | 1  | 147.1128        | 74.0600         |

# Annotated spectra from Saleem et. al. 2009

K.QY<sub>243</sub>YDK<sub>136</sub>R<sub>166</sub>-I/2

0.8037

1e+04

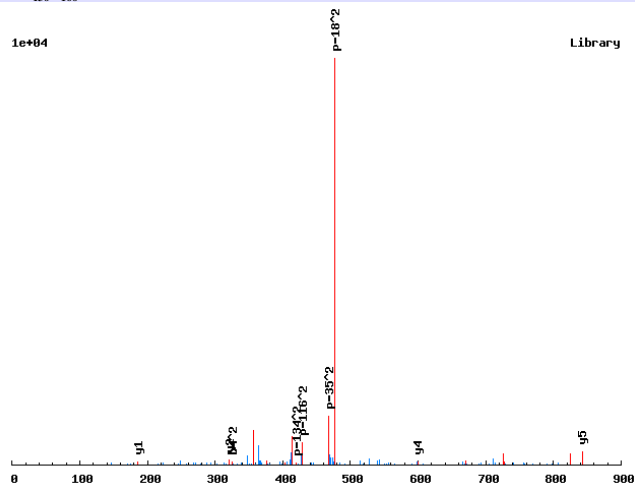

| Library | b <sup>1+</sup> | b <sup>2+</sup> | # | AA     | # | y <sup>1+</sup> | y <sup>2+</sup> |
|---------|-----------------|-----------------|---|--------|---|-----------------|-----------------|
|         | 129.0659        | 65.0366         | 1 | Q      | 6 |                 |                 |
|         | 372.0955        | 186.5514        | 2 | Y[243] | 5 | 842.3563        | 421.6818        |
|         | 535.1589        | 268.0831        | 3 | Y      | 4 | 599.3266        | 300.1670        |
|         | 650.1858        | 325.5965        | 4 | D      | 3 | 436.2633        | 218.6353        |
|         | 786.2950        | 393.6511        | 5 | K[136] | 2 | 321.2364        | 161.1218        |
|         |                 |                 | 6 | R[166] | 1 | 185.1272        | 93.0672         |

Annotated spectra from Saleem et. al. 2009

K.RANSNEDGESVS<sub>167</sub>S<sub>167</sub>IQESPK.I/2

0.9999

1e+04

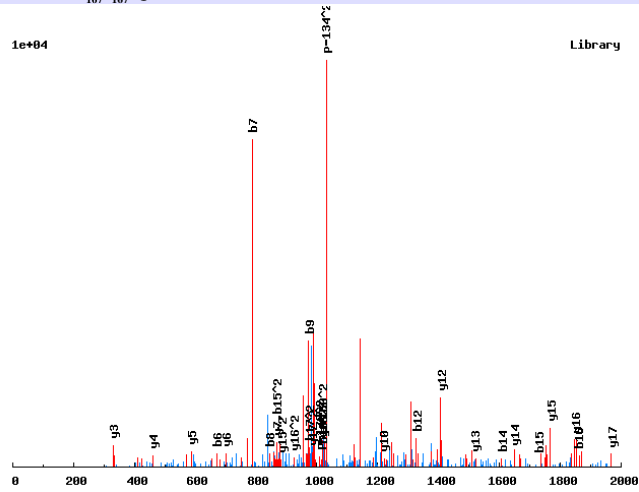

| Library | b <sup>1+</sup> | b <sup>2+</sup> | #  | AA     | #  | y <sup>1+</sup> | y <sup>2+</sup> |
|---------|-----------------|-----------------|----|--------|----|-----------------|-----------------|
|         | 157.1084        | 79.0578         | 1  | R      | 19 |                 |                 |
|         | 228.1455        | 114.5764        | 2  | A      | 18 | 2037.7686       | 1019.3879       |
|         | 342.1884        | 171.5979        | 3  | N      | 17 | 1966.7315       | 983.8694        |
|         | 429.2205        | 215.1139        | 4  | S      | 16 | 1852.6885       | 926.8479        |
|         | 543.2634        | 272.1353        | 5  | N      | 15 | 1765.6565       | 883.3319        |
|         | 672.3060        | 336.6566        | 6  | E      | 14 | 1651.6136       | 826.3104        |
|         | 787.3329        | 394.1701        | 7  | D      | 13 | 1522.5710       | 761.7891        |
|         | 844.3544        | 422.6808        | 8  | G      | 12 | 1407.5440       | 704.2757        |
|         | 973.3970        | 487.2021        | 9  | E      | 11 | 1350.5226       | 675.7649        |
|         | 1060.4290       | 530.7181        | 10 | S      | 10 | 1221.4800       | 611.2436        |
|         | 1159.4974       | 580.2523        | 11 | V      | 9  | 1134.4480       | 567.7276        |
|         | 1326.4958       | 663.7515        | 12 | S[167] | 8  | 1035.3795       | 518.1934        |
|         | 1493.4941       | 747.2507        | 13 | S[167] | 7  | 868.3812        | 434.6942        |
|         | 1606.5782       | 803.7927        | 14 | I      | 6  | 701.3828        | 351.1951        |
|         | 1734.6368       | 867.8220        | 15 | Q      | 5  | 588.2988        | 294.6530        |
|         | 1863.6794       | 932.3433        | 16 | E      | 4  | 460.2402        | 230.6237        |
|         | 1950.7114       | 975.8593        | 17 | S      | 3  | 331.1976        | 166.1024        |
|         | 2047.7642       | 1024.3857       | 18 | P      | 2  | 244.1656        | 122.5864        |
|         |                 |                 | 19 | K      | 1  | 147.1128        | 74.0600         |

# Annotated spectra from Saleem et. al. 2009

K.RANS<sub>167</sub>NEDGES<sub>167</sub>VSS<sub>167</sub>IQES<sub>167</sub>PKISAQPK.A/3

0.988

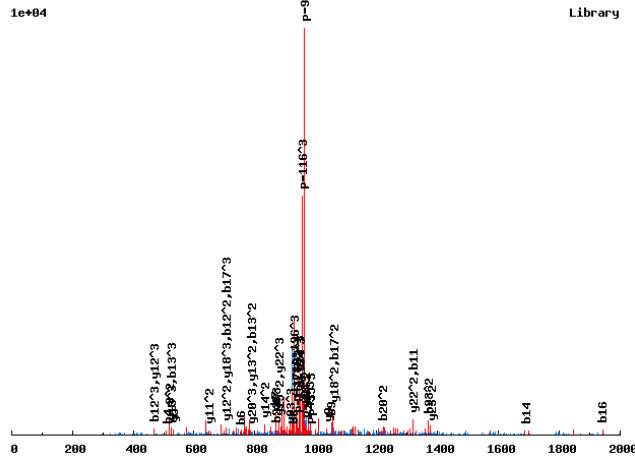

| Library | b <sup>1+</sup> | b <sup>2+</sup> | b <sup>3+</sup> | #  | AA     | #  | y <sup>1+</sup> | y <sup>2+</sup> | y <sup>3+</sup> |
|---------|-----------------|-----------------|-----------------|----|--------|----|-----------------|-----------------|-----------------|
|         | 157.1084        | 79.0578         | 53.0410         | 1  | R      | 25 |                 |                 |                 |
|         | 228.1455        | 114.5764        | 76.7200         | 2  | A      | 24 | 2822.0607       | 1411.5340       | 941.3584        |
|         | 342.1884        | 171.5979        | 114.7343        | 3  | N      | 23 | 2751.0236       | 1376.0154       | 917.6794        |
|         | 509.1868        | 255.0970        | 170.4005        | 4  | S[167] | 22 | 2636.9807       | 1318.9940       | 879.6651        |
|         | 623.2297        | 312.1185        | 208.4148        | 5  | N      | 21 | 2469.9823       | 1235.4948       | 823.9990        |
|         | 752.2723        | 376.6398        | 251.4290        | 6  | E      | 20 | 2355.9394       | 1178.4733       | 785.9847        |
|         | 867.2993        | 434.1533        | 289.7713        | 7  | D      | 19 | 2226.8968       | 1113.9520       | 742.9705        |
|         | 924.3207        | 462.6640        | 308.7784        | 8  | G      | 18 | 2111.8699       | 1056.4386       | 704.6281        |
|         | 1053.3633       | 527.1853        | 351.7926        | 9  | E      | 17 | 2054.8484       | 1027.9278       | 685.6210        |
|         | 1220.3617       | 610.6845        | 407.4587        | 10 | S[167] | 16 | 1925.8058       | 963.4065        | 642.6068        |
|         | 1319.4301       | 660.2187        | 440.4815        | 11 | V      | 15 | 1758.8075       | 879.9074        | 586.9407        |
|         | 1406.4621       | 703.7347        | 469.4922        | 12 | S      | 14 | 1659.7390       | 830.3732        | 553.9179        |
|         | 1573.4605       | 787.2339        | 525.1583        | 13 | S[167] | 13 | 1572.7070       | 786.8571        | 524.9072        |
|         | 1686.5445       | 843.7759        | 562.8530        | 14 | I      | 12 | 1405.7087       | 703.3580        | 469.2411        |
|         | 1814.6031       | 907.8052        | 605.5392        | 15 | Q      | 11 | 1292.6246       | 646.8159        | 431.5464        |
|         | 1943.6457       | 972.3265        | 648.5534        | 16 | E      | 10 | 1164.5660       | 582.7866        | 388.8602        |
|         | 2110.6441       | 1055.8257       | 704.2195        | 17 | S[167] | 9  | 1035.5234       | 518.2654        | 345.8460        |
|         | 2207.6968       | 1104.3520       | 736.5705        | 18 | P      | 8  | 868.5251        | 434.7662        | 290.1799        |
|         | 2335.7918       | 1168.3995       | 779.2688        | 19 | K      | 7  | 771.4723        | 386.2398        | 257.8290        |
|         | 2448.8758       | 1224.9416       | 816.9635        | 20 | I      | 6  | 643.3773        | 322.1923        | 215.1306        |
|         | 2535.9079       | 1268.4576       | 845.9741        | 21 | S      | 5  | 530.2933        | 265.6503        | 177.4359        |
|         | 2606.9450       | 1303.9761       | 869.6532        | 22 | A      | 4  | 443.2613        | 222.1343        | 148.4253        |
|         | 2735.0036       | 1368.0054       | 912.3394        | 23 | Q      | 3  | 372.2241        | 186.6157        | 124.7462        |
|         | 2832.0563       | 1416.5318       | 944.6903        | 24 | P      | 2  | 244.1656        | 122.5864        | 82.0600         |
|         |                 |                 |                 | 25 | K      | 1  | 147.1128        | 74.0600         | 49.7091         |



# Annotated spectra from Saleem et. al. 2009

R.RAS<sub>167</sub>FSLHNDKQPAAK.S/3

0.7851

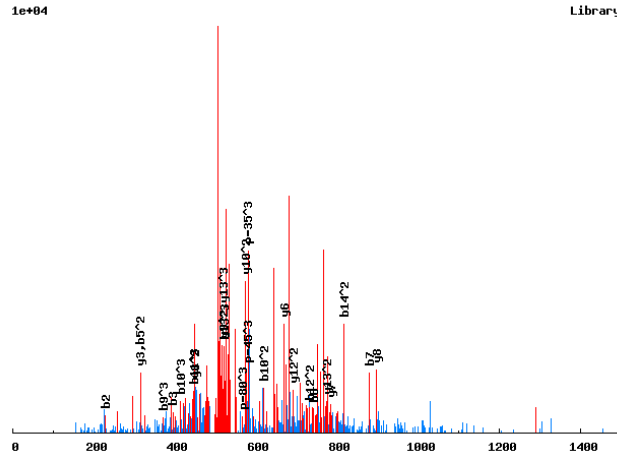

| Library | b <sup>1+</sup> | b <sup>2+</sup> | b <sup>3+</sup> | #  | AA     | #  | y <sup>1+</sup> | y <sup>2+</sup> | y <sup>3+</sup> |
|---------|-----------------|-----------------|-----------------|----|--------|----|-----------------|-----------------|-----------------|
|         | 157.1084        | 79.0578         | 53.0410         | 1  | R      | 15 |                 |                 |                 |
|         | <b>228.1455</b> | 114.5764        | 76.7200         | 2  | A      | 14 | 1619.7577       | 810.3825        | 540.5908        |
|         | <b>395.1439</b> | 198.0756        | 132.3861        | 3  | S[167] | 13 | 1548.7206       | <b>774.8639</b> | <b>516.9117</b> |
|         | 542.2123        | 271.6098        | 181.4089        | 4  | F      | 12 | 1381.7222       | <b>691.3648</b> | 461.2456        |
|         | 629.2443        | <b>315.1258</b> | 210.4196        | 5  | S      | 11 | 1234.6538       | 617.8306        | 412.2228        |
|         | <b>742.3284</b> | 371.6678        | 248.1143        | 6  | L      | 10 | 1147.6218       | <b>574.3145</b> | 383.2121        |
|         | <b>879.3873</b> | 440.1973        | 293.8006        | 7  | H      | 9  | 1034.5378       | <b>517.7725</b> | 345.5174        |
|         | 993.4302        | 497.2187        | 331.8149        | 8  | N      | 8  | <b>897.4788</b> | <b>449.2431</b> | 299.8311        |
|         | 1108.4571       | 554.7322        | <b>370.1572</b> | 9  | D      | 7  | <b>783.4359</b> | 392.2216        | 261.8168        |
|         | 1236.5521       | <b>618.7797</b> | <b>412.8556</b> | 10 | K      | 6  | <b>668.4090</b> | 334.7081        | 223.4745        |
|         | 1333.6049       | 667.3061        | <b>445.2065</b> | 11 | P      | 5  | 540.3140        | 270.6606        | 180.7762        |
|         | 1461.6634       | <b>731.3354</b> | 487.8927        | 12 | Q      | 4  | 443.2613        | 222.1343        | 148.4253        |
|         | 1558.7162       | 779.8617        | <b>520.2436</b> | 13 | P      | 3  | <b>315.2027</b> | 158.1050        | 105.7391        |
|         | 1629.7533       | <b>815.3803</b> | 543.9226        | 14 | A      | 2  | 218.1499        | 109.5786        | 73.3882         |
|         |                 |                 |                 | 15 | K      | 1  | 147.1128        | 74.0600         | 49.7091         |





# Annotated spectra from Saleem et. al. 2009

R.RAS<sub>167</sub>S<sub>167</sub>AAATSIDK.E/2

0.9972

1e+04

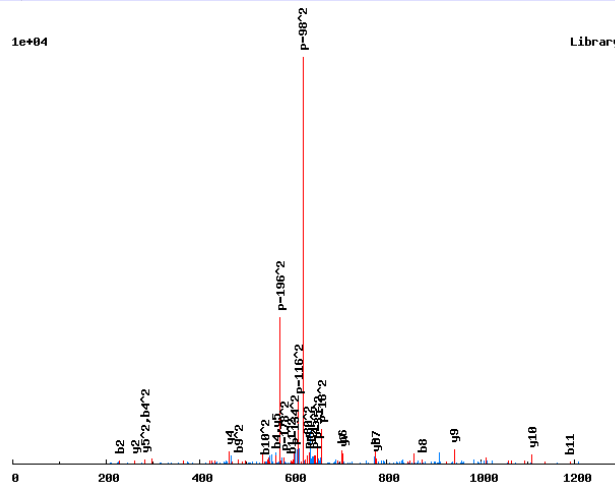

| Library | b <sup>1+</sup>  | b <sup>2+</sup> | #  | AA     | #  | y <sup>1+</sup> | y <sup>2+</sup> |
|---------|------------------|-----------------|----|--------|----|-----------------|-----------------|
|         | 157.1084         | 79.0578         | 1  | R      | 12 |                 |                 |
|         | <b>228.1455</b>  | 114.5764        | 2  | A      | 11 | 1181.4487       | 591.2280        |
|         | 395.1439         | 198.0756        | 3  | S[167] | 10 | 1110.4116       | 555.7094        |
|         | <b>562.1422</b>  | <b>281.5748</b> | 4  | S[167] | 9  | <b>943.4132</b> | 472.2102        |
|         | 633.1793         | 317.0933        | 5  | A      | 8  | <b>776.4148</b> | 388.7111        |
|         | <b>704.2164</b>  | 352.6119        | 6  | A      | 7  | <b>705.3777</b> | 353.1925        |
|         | <b>775.2536</b>  | 388.1304        | 7  | A      | 6  | <b>634.3406</b> | 317.6740        |
|         | <b>876.3012</b>  | 438.6543        | 8  | T      | 5  | <b>563.3035</b> | <b>282.1554</b> |
|         | 963.3333         | <b>482.1703</b> | 9  | S      | 4  | <b>462.2558</b> | 231.6316        |
|         | 1076.4173        | <b>538.7123</b> | 10 | I      | 3  | 375.2238        | 188.1155        |
|         | <b>1191.4443</b> | <b>596.2258</b> | 11 | D      | 2  | <b>262.1397</b> | 131.5735        |
|         |                  |                 | 12 | K      | 1  | 147.1128        | 74.0600         |

Annotated spectra from Saleem et. al. 2009

R.RASS<sub>167</sub>-IFS<sub>167</sub>-INTTLPAPPNATDIQK.F/3

0.9761

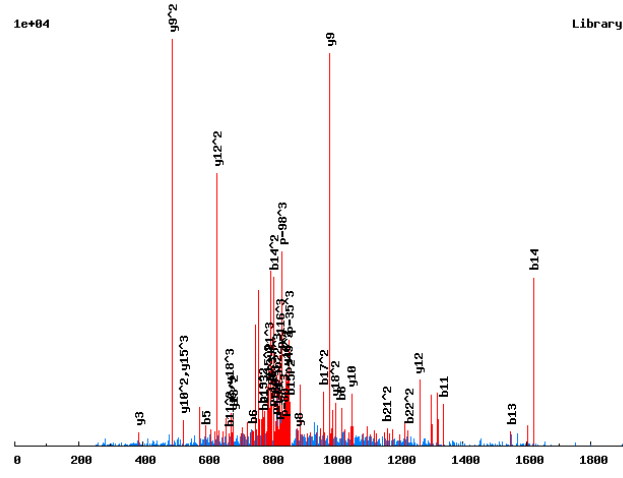

| Library | b <sup>1+</sup>  | b <sup>2+</sup>  | b <sup>3+</sup> | #  | AA     | #  | y <sup>1+</sup>  | y <sup>2+</sup>  | y <sup>3+</sup> |
|---------|------------------|------------------|-----------------|----|--------|----|------------------|------------------|-----------------|
|         | 157.1084         | 79.0578          | 53.0410         | 1  | R      | 23 |                  |                  |                 |
|         | 228.1455         | 114.5764         | 76.7200         | 2  | A      | 22 | 2446.1302        | 1223.5688        | 816.0483        |
|         | 315.1775         | 158.0924         | 105.7307        | 3  | S      | 21 | 2375.0931        | 1188.0502        | <b>792.3692</b> |
|         | 482.1759         | 241.5916         | 161.3968        | 4  | S[167] | 20 | 2288.0611        | 1144.5342        | 763.3586        |
|         | <b>595.2600</b>  | 298.1336         | 199.0915        | 5  | I      | 19 | 2121.0627        | 1061.0350        | 707.6924        |
|         | <b>742.3284</b>  | 371.6678         | 248.1143        | 6  | F      | 18 | 2007.9787        | <b>1004.4930</b> | <b>669.9977</b> |
|         | 909.3267         | 455.1670         | 303.7804        | 7  | S[167] | 17 | 1860.9103        | 930.9588         | 620.9749        |
|         | <b>1022.4108</b> | 511.7090         | 341.4751        | 8  | I      | 16 | 1693.9119        | <b>847.4596</b>  | 565.3088        |
|         | 1136.4537        | 568.7305         | 379.4894        | 9  | N      | 15 | 1580.8278        | <b>790.9176</b>  | <b>527.6141</b> |
|         | 1237.5014        | 619.2543         | 413.1720        | 10 | T      | 14 | 1466.7849        | 733.8961         | 489.5998        |
|         | <b>1338.5491</b> | <b>669.7782</b>  | 446.8545        | 11 | T      | 13 | 1365.7372        | <b>683.3723</b>  | 455.9173        |
|         | 1435.6018        | 718.3046         | 479.2055        | 12 | P      | 12 | <b>1264.6895</b> | <b>632.8484</b>  | 422.2347        |
|         | <b>1548.6859</b> | <b>774.8466</b>  | 516.9002        | 13 | L      | 11 | 1167.6368        | 584.3220         | 389.8838        |
|         | <b>1619.7230</b> | <b>810.3651</b>  | 540.5792        | 14 | A      | 10 | <b>1054.5527</b> | <b>527.7800</b>  | 352.1891        |
|         | 1716.7758        | <b>858.8915</b>  | 572.9301        | 15 | P      | 9  | <b>983.5156</b>  | <b>492.2615</b>  | 328.5101        |
|         | 1813.8285        | 907.4179         | 605.2810        | 16 | P      | 8  | <b>886.4629</b>  | 443.7351         | 296.1591        |
|         | 1927.8715        | <b>964.4394</b>  | 643.2953        | 17 | N      | 7  | 789.4101         | 395.2087         | 263.8082        |
|         | 1998.9086        | 999.9579         | 666.9744        | 18 | A      | 6  | <b>675.3672</b>  | 338.1872         | 225.7939        |
|         | 2099.9562        | 1050.4818        | 700.6569        | 19 | T      | 5  | 604.3301         | 302.6687         | 202.1149        |
|         | 2214.9832        | 1107.9952        | 738.9992        | 20 | D      | 4  | 503.2824         | 252.1448         | 168.4323        |
|         | 2328.0672        | <b>1164.5373</b> | <b>776.6939</b> | 21 | I      | 3  | <b>388.2554</b>  | 194.6314         | 130.0900        |
|         | 2456.1258        | <b>1228.5666</b> | <b>819.3801</b> | 22 | Q      | 2  | 275.1714         | 138.0893         | 92.3953         |
|         |                  |                  |                 | 23 | K      | 1  | 147.1128         | 74.0600          | 49.7091         |

# Annotated spectra from Saleem et. al. 2009

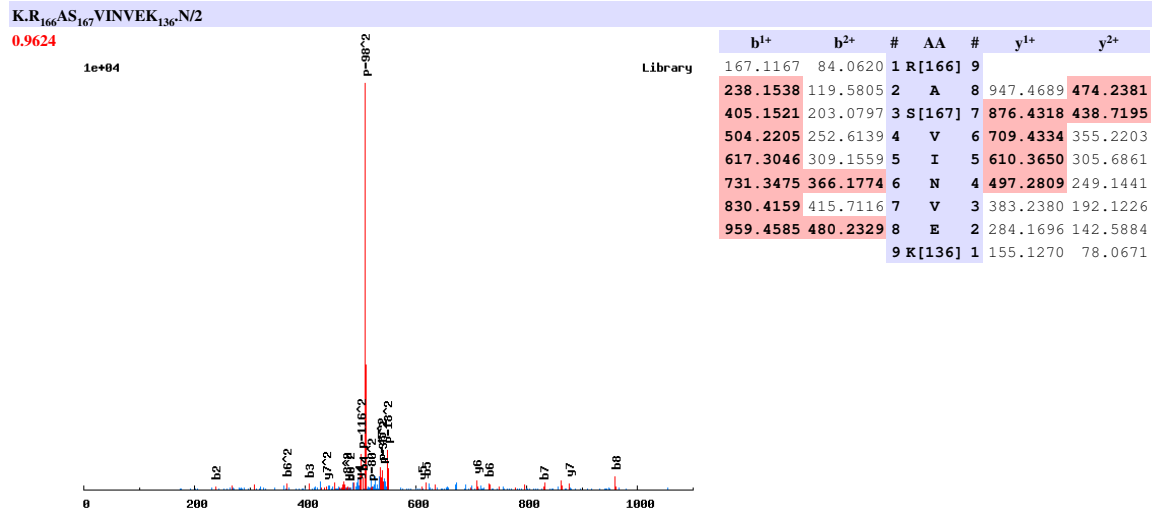

# Annotated spectra from Saleem et. al. 2009

R.RAT<sub>181</sub>PVS<sub>167</sub>TPVISKPSMTTTPR.Q/3

0.9999

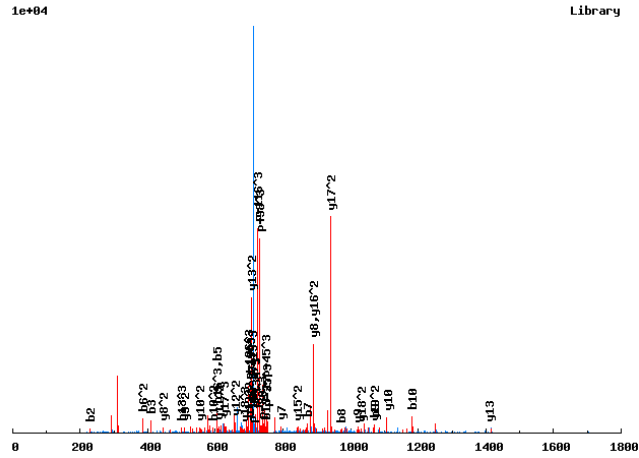

| Library | b <sup>1+</sup>  | b <sup>2+</sup> | b <sup>3+</sup> | #  | AA     | #  | y <sup>1+</sup>  | y <sup>2+</sup>  | y <sup>3+</sup> |
|---------|------------------|-----------------|-----------------|----|--------|----|------------------|------------------|-----------------|
|         | 157.1084         | 79.0578         | 53.0410         | 1  | R      | 20 |                  |                  |                 |
|         | <b>228.1455</b>  | 114.5764        | 76.7200         | 2  | A      | 19 | 2130.9906        | <b>1065.9989</b> | <b>711.0017</b> |
|         | <b>409.1595</b>  | 205.0834        | 137.0580        | 3  | T[181] | 18 | 2059.9535        | <b>1030.4804</b> | <b>687.3227</b> |
|         | 506.2123         | 253.6098        | 169.4089        | 4  | P      | 17 | 1878.9395        | <b>939.9734</b>  | <b>626.9847</b> |
|         | <b>605.2807</b>  | 303.1440        | 202.4317        | 5  | V      | 16 | 1781.8867        | <b>891.4470</b>  | 594.6338        |
|         | 772.2790         | <b>386.6432</b> | 258.0979        | 6  | S[167] | 15 | 1682.8183        | <b>841.9128</b>  | 561.6110        |
|         | <b>873.3267</b>  | 437.1670        | 291.7804        | 7  | T      | 14 | 1515.8199        | 758.4136         | 505.9448        |
|         | <b>970.3795</b>  | 485.6934        | 324.1313        | 8  | P      | 13 | <b>1414.7722</b> | <b>707.8898</b>  | 472.2623        |
|         | <b>1069.4479</b> | 535.2276        | 357.1542        | 9  | V      | 12 | 1317.7195        | <b>659.3634</b>  | 439.9114        |
|         | <b>1182.5320</b> | <b>591.7696</b> | 394.8488        | 10 | I      | 11 | 1218.6511        | <b>609.8292</b>  | 406.8885        |
|         | 1269.5640        | 635.2856        | 423.8595        | 11 | S      | 10 | <b>1105.5670</b> | <b>553.2872</b>  | 369.1939        |
|         | 1397.6589        | <b>699.3331</b> | 466.5578        | 12 | K      | 9  | <b>1018.5350</b> | <b>509.7711</b>  | 340.1832        |
|         | 1494.7117        | <b>747.8595</b> | <b>498.9088</b> | 13 | P      | 8  | <b>890.4400</b>  | <b>445.7237</b>  | 297.4849        |
|         | 1581.7437        | 791.3755        | 527.9194        | 14 | S      | 7  | <b>793.3873</b>  | 397.1973         | 265.1339        |
|         | 1712.7842        | 856.8958        | 571.5996        | 15 | M      | 6  | <b>706.3552</b>  | 353.6813         | 236.1233        |
|         | 1813.8319        | 907.4196        | <b>605.2822</b> | 16 | T      | 5  | 575.3148         | 288.1610         | 192.4431        |
|         | 1914.8796        | 957.9434        | 638.9647        | 17 | T      | 4  | 474.2671         | 237.6372         | 158.7605        |
|         | 2015.9273        | 1008.4673       | 672.6473        | 18 | T      | 3  | 373.2194         | 187.1133         | 125.0780        |
|         | 2112.9800        | 1056.9937       | <b>704.9982</b> | 19 | P      | 2  | 272.1717         | 136.5895         | 91.3954         |
|         |                  |                 |                 | 20 | R      | 1  | 175.1190         | 88.0631          | 59.0445         |

# Annotated spectra from Saleem et. al. 2009

R.R<sub>166</sub>DS<sub>167</sub>APDNQGIYHTVISK<sub>136</sub>-N/3

0.9998

1e+04

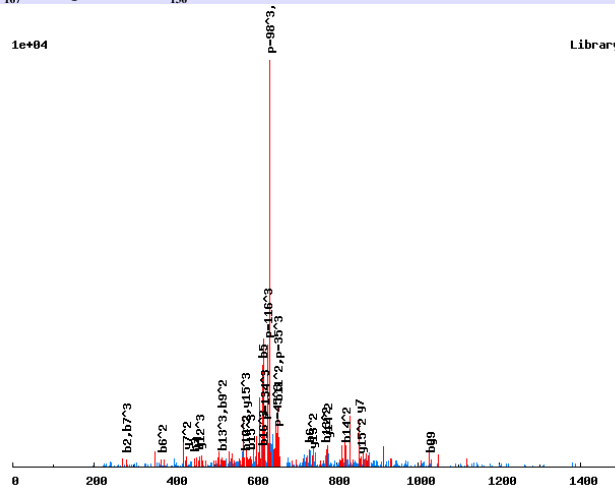

| Library | b <sup>1+</sup>  | b <sup>2+</sup> | b <sup>3+</sup> | #  | AA     | #  | y <sup>1+</sup>  | y <sup>2+</sup> | y <sup>3+</sup> |
|---------|------------------|-----------------|-----------------|----|--------|----|------------------|-----------------|-----------------|
|         | 167.1167         | 84.0620         | 56.3771         | 1  | R[166] | 17 |                  |                 |                 |
|         | <b>282.1436</b>  | 141.5754        | 94.7194         | 2  | D      | 16 | 1832.8306        | 916.9189        | 611.6150        |
|         | <b>449.1420</b>  | 225.0746        | 150.3855        | 3  | S[167] | 15 | 1717.8036        | <b>859.4054</b> | <b>573.2727</b> |
|         | 520.1791         | 260.5932        | 174.0645        | 4  | A      | 14 | 1550.8053        | <b>775.9063</b> | 517.6066        |
|         | <b>617.2318</b>  | 309.1196        | 206.4155        | 5  | P      | 13 | 1479.7681        | <b>740.3877</b> | 493.9276        |
|         | <b>732.2588</b>  | <b>366.6330</b> | 244.7578        | 6  | D      | 12 | 1382.7154        | 691.8613        | <b>461.5766</b> |
|         | 846.3017         | 423.6545        | <b>282.7721</b> | 7  | N      | 11 | 1267.6884        | <b>634.3479</b> | 423.2343        |
|         | 974.3603         | 487.6838        | 325.4583        | 8  | Q      | 10 | 1153.6455        | 577.3264        | 385.2200        |
|         | <b>1031.3817</b> | <b>516.1945</b> | 344.4654        | 9  | G      | 9  | <b>1025.5869</b> | 513.2971        | 342.5338        |
|         | 1144.4658        | <b>572.7365</b> | 382.1601        | 10 | I      | 8  | 968.5655         | 484.7864        | 323.5267        |
|         | 1307.5291        | <b>654.2682</b> | 436.5146        | 11 | Y      | 7  | <b>855.4814</b>  | <b>428.2443</b> | 285.8320        |
|         | 1444.5880        | 722.7977        | 482.2009        | 12 | H      | 6  | 692.4181         | 346.7127        | 231.4775        |
|         | 1545.6357        | <b>773.3215</b> | <b>515.8834</b> | 13 | T      | 5  | 555.3592         | 278.1832        | 185.7912        |
|         | 1644.7041        | <b>822.8557</b> | 548.9062        | 14 | V      | 4  | <b>454.3115</b>  | 227.6594        | 152.1087        |
|         | 1757.7882        | 879.3977        | <b>586.6009</b> | 15 | I      | 3  | 355.2431         | 178.1252        | 119.0859        |
|         | 1844.8202        | 922.9137        | <b>615.6116</b> | 16 | S      | 2  | 242.1590         | 121.5832        | 81.3912         |
|         |                  |                 |                 | 17 | K[136] | 1  | 155.1270         | 78.0671         | 52.3805         |



# Annotated spectra from Saleem et. al. 2009

R.RDS<sub>167</sub>DNAVHAAAS<sub>167</sub>PLAPSNTPSDPK.S/3

0.9941

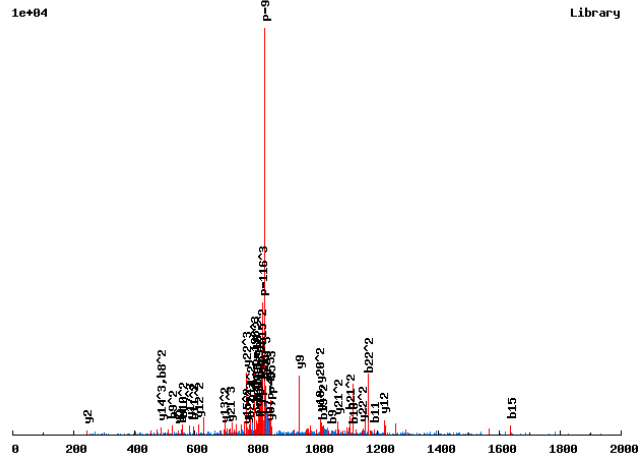

| Library | b <sup>1+</sup> | b <sup>2+</sup> | b <sup>3+</sup> | #  | AA     | #  | y <sup>1+</sup> | y <sup>2+</sup> | y <sup>3+</sup> |
|---------|-----------------|-----------------|-----------------|----|--------|----|-----------------|-----------------|-----------------|
|         | 157.1084        | 79.0578         | 53.0410         | 1  | R      | 24 |                 |                 |                 |
|         | 272.1353        | 136.5713        | 91.3833         | 2  | D      | 23 | 2421.9959       | 1211.5016       | 808.0035        |
|         | 439.1337        | 220.0705        | 147.0494        | 3  | S[167] | 22 | 2306.9690       | 1153.9881       | 769.6612        |
|         | 554.1606        | 277.5840        | 185.3917        | 4  | D      | 21 | 2139.9706       | 1070.4889       | 713.9951        |
|         | 668.2036        | 334.6054        | 223.4060        | 5  | N      | 20 | 2024.9437       | 1012.9755       | 675.6527        |
|         | 739.2407        | 370.1240        | 247.0851        | 6  | A      | 19 | 1910.9007       | 955.9540        | 637.6384        |
|         | 838.3091        | 419.6582        | 280.1079        | 7  | V      | 18 | 1839.8636       | 920.4355        | 613.9594        |
|         | 975.3680        | 488.1876        | 325.7942        | 8  | H      | 17 | 1740.7952       | 870.9013        | 580.9366        |
|         | 1046.4051       | 523.7062        | 349.4732        | 9  | A      | 16 | 1603.7363       | 802.3718        | 535.2503        |
|         | 1117.4422       | 559.2247        | 373.1523        | 10 | A      | 15 | 1532.6992       | 766.8532        | 511.5713        |
|         | 1188.4793       | 594.7433        | 396.8313        | 11 | A      | 14 | 1461.6621       | 731.3347        | 487.8922        |
|         | 1355.4777       | 678.2425        | 452.4974        | 12 | S[167] | 13 | 1390.6250       | 695.8161        | 464.2132        |
|         | 1452.5304       | 726.7689        | 484.8483        | 13 | P      | 12 | 1223.6266       | 612.3169        | 408.5471        |
|         | 1565.6145       | 783.3109        | 522.5430        | 14 | L      | 11 | 1126.5739       | 563.7906        | 376.1961        |
|         | 1636.6516       | 818.8294        | 546.2221        | 15 | A      | 10 | 1013.4898       | 507.2485        | 338.5015        |
|         | 1733.7044       | 867.3558        | 578.5730        | 16 | P      | 9  | 942.4527        | 471.7300        | 314.8224        |
|         | 1820.7364       | 910.8718        | 607.5837        | 17 | S      | 8  | 845.3999        | 423.2036        | 282.4715        |
|         | 1934.7793       | 967.8933        | 645.5980        | 18 | N      | 7  | 758.3679        | 379.6876        | 253.4608        |
|         | 2035.8270       | 1018.4171       | 679.2805        | 19 | T      | 6  | 644.3250        | 322.6661        | 215.4465        |
|         | 2132.8798       | 1066.9435       | 711.6314        | 20 | P      | 5  | 543.2773        | 272.1423        | 181.7640        |
|         | 2219.9118       | 1110.4595       | 740.6421        | 21 | S      | 4  | 446.2245        | 223.6159        | 149.4130        |
|         | 2334.9387       | 1167.9730       | 778.9844        | 22 | D      | 3  | 359.1925        | 180.0999        | 120.4024        |
|         | 2431.9915       | 1216.4994       | 811.3354        | 23 | P      | 2  | 244.1656        | 122.5864        | 82.0600         |
|         |                 |                 |                 | 24 | K      | 1  | 147.1128        | 74.0600         | 49.7091         |

# Annotated spectra from Saleem et. al. 2009

K.R.<sub>166</sub>DS<sub>167</sub>SIS<sub>167</sub>ITSK<sub>136</sub>D/2

0.7198

1e+04

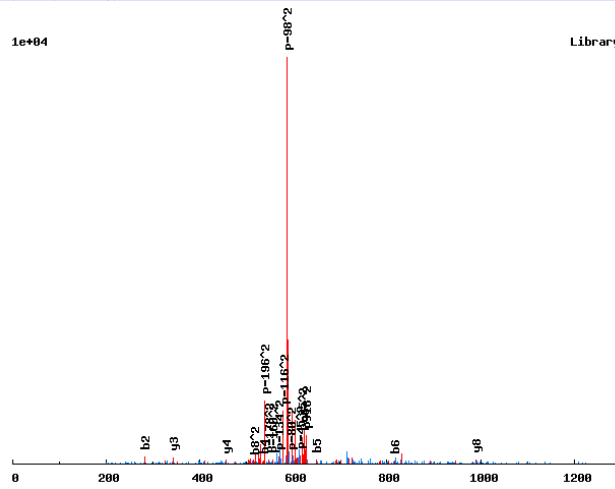

| Library | b <sup>1+</sup> | b <sup>2+</sup> | #  | AA     | #  | y <sup>1+</sup> | y <sup>2+</sup> |
|---------|-----------------|-----------------|----|--------|----|-----------------|-----------------|
|         | 167.1167        | 84.0620         | 1  | R[166] | 10 |                 |                 |
|         | 282.1436        | 141.5754        | 2  | D      | 9  | 1105.4305       | 553.2189        |
|         | 449.1420        | 225.0746        | 3  | S[167] | 8  | 990.4036        | 495.7054        |
|         | 536.1740        | 268.5906        | 4  | S      | 7  | 823.4052        | 412.2063        |
|         | 649.2581        | 325.1327        | 5  | I      | 6  | 736.3732        | 368.6902        |
|         | 816.2564        | 408.6318        | 6  | S[167] | 5  | 623.2891        | 312.1482        |
|         | 929.3405        | 465.1739        | 7  | I      | 4  | 456.2908        | 228.6490        |
|         | 1030.3882       | 515.6977        | 8  | T      | 3  | 343.2067        | 172.1070        |
|         | 1117.4202       | 559.2137        | 9  | S      | 2  | 242.1590        | 121.5832        |
|         |                 |                 | 10 | K[136] | 1  | 155.1270        | 78.0671         |

# Annotated spectra from Saleem et. al. 2009

R.RES<sub>167</sub>IIS<sub>167</sub>TGSEFLPPPK.I/2

0.7709

1e+04

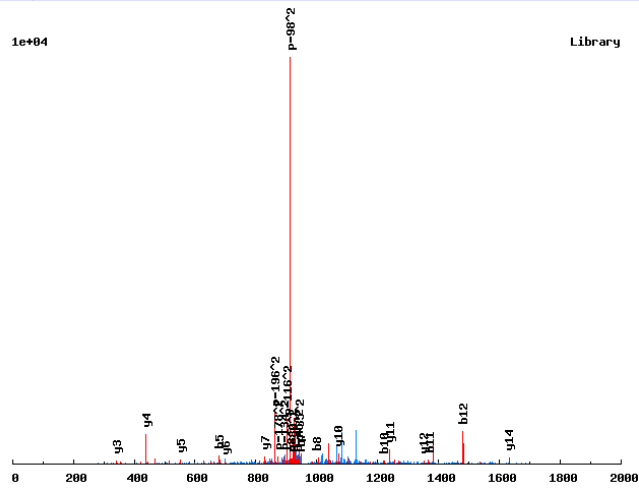

| Library | b <sup>1+</sup> | b <sup>2+</sup> | #  | AA     | #  | y <sup>1+</sup> | y <sup>2+</sup> |
|---------|-----------------|-----------------|----|--------|----|-----------------|-----------------|
|         | 157.1084        | 79.0578         | 1  | R      | 16 |                 |                 |
|         | 286.1510        | 143.5791        | 2  | E      | 15 | 1761.7747       | 881.3910        |
|         | 453.1493        | 227.0783        | 3  | S[167] | 14 | 1632.7322       | 816.8697        |
|         | 566.2334        | 283.6203        | 4  | I      | 13 | 1465.7338       | 733.3705        |
|         | 679.3175        | 340.1624        | 5  | I      | 12 | 1352.6497       | 676.8285        |
|         | 846.3158        | 423.6616        | 6  | S[167] | 11 | 1239.5657       | 620.2865        |
|         | 947.3635        | 474.1854        | 7  | T      | 10 | 1072.5673       | 536.7873        |
|         | 1004.3850       | 502.6961        | 8  | G      | 9  | 971.5196        | 486.2635        |
|         | 1091.4170       | 546.2121        | 9  | S      | 8  | 914.4982        | 457.7527        |
|         | 1220.4596       | 610.7334        | 10 | E      | 7  | 827.4661        | 414.2367        |
|         | 1367.5280       | 684.2676        | 11 | F      | 6  | 698.4236        | 349.7154        |
|         | 1480.6121       | 740.8097        | 12 | L      | 5  | 551.3551        | 276.1812        |
|         | 1577.6648       | 789.3360        | 13 | P      | 4  | 438.2711        | 219.6392        |
|         | 1674.7176       | 837.8624        | 14 | P      | 3  | 341.2183        | 171.1128        |
|         | 1771.7703       | 886.3888        | 15 | P      | 2  | 244.1656        | 122.5864        |
|         |                 |                 | 16 | K      | 1  | 147.1128        | 74.0600         |

# Annotated spectra from Saleem et. al. 2009

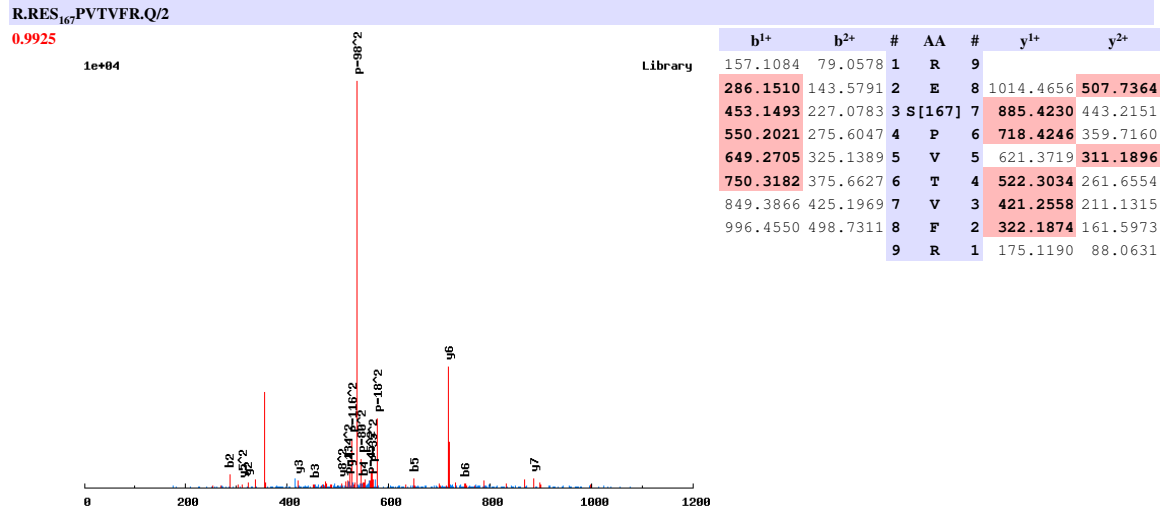

# Annotated spectra from Saleem et. al. 2009

R.R<sub>166</sub>FT<sub>181</sub>NNDM<sub>147</sub>DS<sub>167</sub>IVVK<sub>136</sub>R/2

0.9998

1e+04

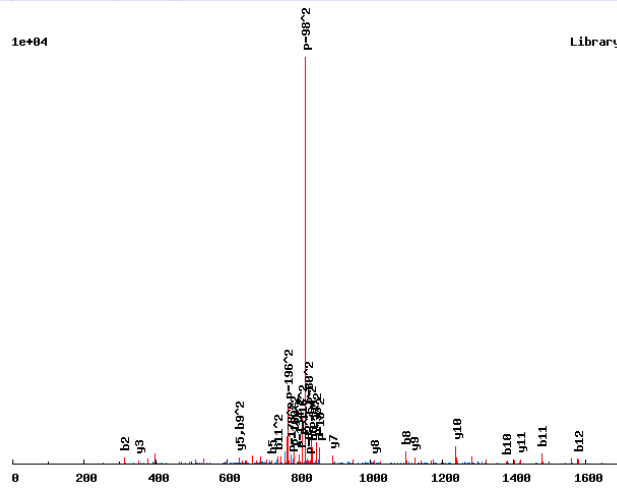

| Library | b <sup>1+</sup>  | b <sup>2+</sup> | #  | AA     | #  | y <sup>1+</sup>  | y <sup>2+</sup> |
|---------|------------------|-----------------|----|--------|----|------------------|-----------------|
|         | 167.1167         | 84.0620         | 1  | R[166] | 13 |                  |                 |
|         | <b>314.1851</b>  | 157.5962        | 2  | F      | 12 | 1566.6038        | 783.8055        |
|         | 495.1991         | 248.1032        | 3  | T[181] | 11 | <b>1419.5354</b> | 710.2713        |
|         | 609.2420         | 305.1246        | 4  | N      | 10 | <b>1238.5214</b> | 619.7643        |
|         | <b>723.2849</b>  | 362.1461        | 5  | N      | 9  | <b>1124.4784</b> | 562.7429        |
|         | <b>838.3119</b>  | 419.6596        | 6  | D      | 8  | <b>1010.4355</b> | 505.7214        |
|         | 985.3473         | 493.1773        | 7  | M[147] | 7  | <b>895.4086</b>  | 448.2079        |
|         | <b>1100.3742</b> | 550.6907        | 8  | D      | 6  | 748.3732         | 374.6902        |
|         | 1267.3726        | <b>634.1899</b> | 9  | S[167] | 5  | <b>633.3462</b>  | 317.1768        |
|         | <b>1380.4566</b> | 690.7320        | 10 | I      | 4  | 466.3479         | 233.6776        |
|         | <b>1479.5251</b> | <b>740.2662</b> | 11 | V      | 3  | <b>353.2638</b>  | 177.1355        |
|         | <b>1578.5935</b> | 789.8004        | 12 | V      | 2  | 254.1954         | 127.6013        |
|         |                  |                 | 13 | K[136] | 1  | 155.1270         | 78.0671         |

# Annotated spectra from Saleem et. al. 2009

K.RGET<sub>181</sub>FAS<sub>167</sub>LANDKK.A/3

0.7487

1e+04

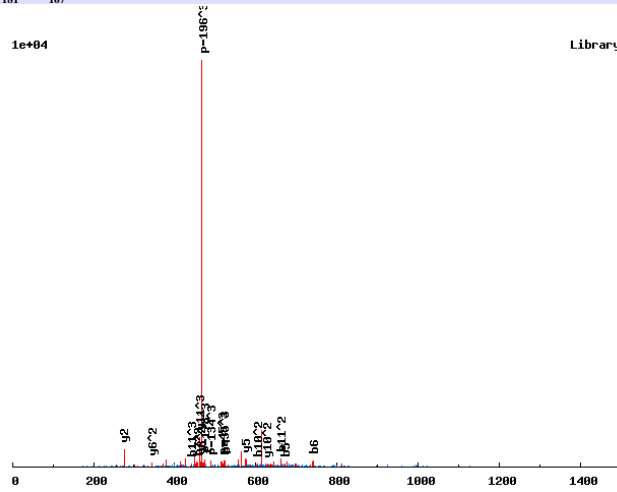

| Library | b <sup>1+</sup> | b <sup>2+</sup> | b <sup>3+</sup> | #  | AA     | #  | y <sup>1+</sup> | y <sup>2+</sup> | y <sup>3+</sup> |
|---------|-----------------|-----------------|-----------------|----|--------|----|-----------------|-----------------|-----------------|
|         | 157.1084        | 79.0578         | 53.0410         | 1  | R      | 13 |                 |                 |                 |
|         | 214.1299        | 107.5686        | 72.0481         | 2  | G      | 12 | 1440.5807       | 720.7940        | 480.8651        |
|         | 343.1724        | 172.0899        | 115.0623        | 3  | E      | 11 | 1383.5593       | 692.2833        | 461.8579        |
|         | 524.1865        | 262.5969        | 175.4003        | 4  | T[181] | 10 | 1254.5167       | 627.7620        | 418.8438        |
|         | 671.2549        | 336.1311        | 224.4231        | 5  | F      | 9  | 1073.5027       | 537.2550        | 358.5057        |
|         | 742.2920        | 371.6496        | 248.1022        | 6  | A      | 8  | 926.4343        | 463.7208        | 309.4829        |
|         | 909.2903        | 455.1488        | 303.7683        | 7  | S[167] | 7  | 855.3972        | 428.2022        | 285.8039        |
|         | 1022.3744       | 511.6908        | 341.4630        | 8  | L      | 6  | 688.3988        | 344.7030        | 230.1378        |
|         | 1093.4115       | 547.2094        | 365.1420        | 9  | A      | 5  | 575.3147        | 288.1610        | 192.4431        |
|         | 1207.4544       | 604.2309        | 403.1563        | 10 | N      | 4  | 504.2776        | 252.6425        | 168.7641        |
|         | 1322.4814       | 661.7443        | 441.4986        | 11 | D      | 3  | 390.2347        | 195.6210        | 130.7498        |
|         | 1450.5763       | 725.7918        | 484.1970        | 12 | K      | 2  | 275.2078        | 138.1075        | 92.4074         |
|         |                 |                 |                 | 13 | K      | 1  | 147.1128        | 74.0600         | 49.7091         |

# Annotated spectra from Saleem et. al. 2009

K.R.<sub>166</sub>GLSS<sub>167</sub>VASPR<sub>166</sub>Q/2

0.7196

1e+04

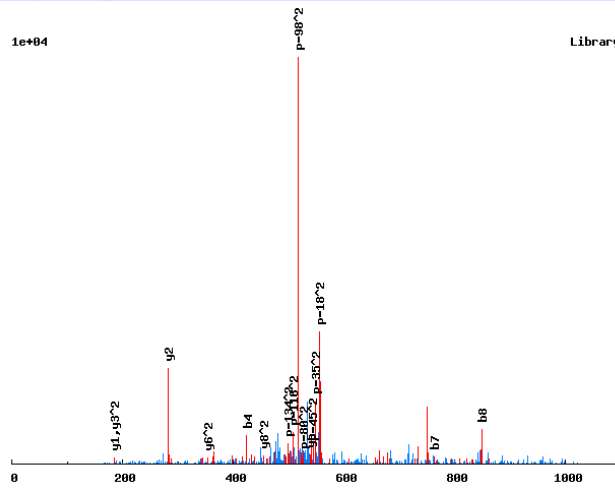

| Library | b <sup>1+</sup> | b <sup>2+</sup> | #  | AA     | #  | y <sup>1+</sup> | y <sup>2+</sup> |
|---------|-----------------|-----------------|----|--------|----|-----------------|-----------------|
|         | 167.1167        | 84.0620         | 1  | R[166] | 10 |                 |                 |
|         | 224.1381        | 112.5727        | 2  | G      | 9  | 963.4534        | 482.2304        |
|         | 337.2222        | 169.1147        | 3  | L      | 8  | 906.4320        | 453.7196        |
|         | 424.2542        | 212.6307        | 4  | S      | 7  | 793.3479        | 397.1776        |
|         | 591.2526        | 296.1299        | 5  | S[167] | 6  | 706.3159        | 353.6616        |
|         | 690.3210        | 345.6641        | 6  | V      | 5  | 539.3175        | 270.1624        |
|         | 761.3581        | 381.1827        | 7  | A      | 4  | 440.2491        | 220.6282        |
|         | 848.3901        | 424.6987        | 8  | S      | 3  | 369.2120        | 185.1096        |
|         | 945.4429        | 473.2251        | 9  | P      | 2  | 282.1800        | 141.5936        |
|         |                 |                 | 10 | R[166] | 1  | 185.1272        | 93.0672         |







# Annotated spectra from Saleem et. al. 2009

R.R<sub>166</sub>GS<sub>167</sub>TISPT<sub>181</sub>TTINNSNPNFK<sub>136</sub>L/3

0.7387

1e+04

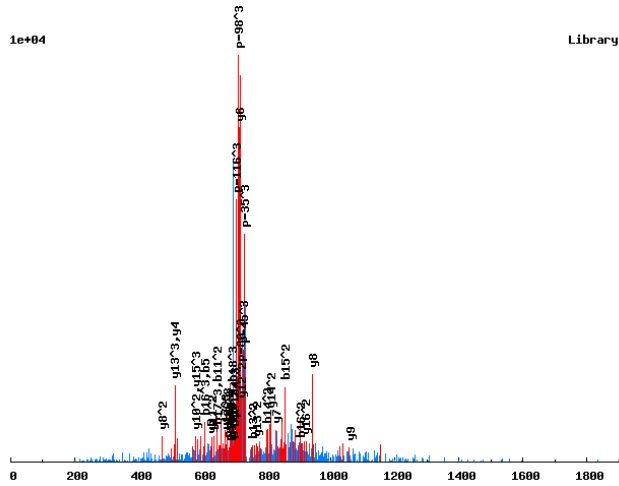

| Library | b <sup>1+</sup> | b <sup>2+</sup> | b <sup>3+</sup> | #  | AA     | #  | y <sup>1+</sup> | y <sup>2+</sup> | y <sup>3+</sup> |
|---------|-----------------|-----------------|-----------------|----|--------|----|-----------------|-----------------|-----------------|
|         | 167.1167        | 84.0620         | 56.3771         | 1  | R[166] | 19 |                 |                 |                 |
|         | 224.1381        | 112.5727        | 75.3842         | 2  | G      | 18 | 2060.8817       | 1030.9445       | 687.6321        |
|         | 391.1365        | 196.0719        | 131.0503        | 3  | S[167] | 17 | 2003.8602       | 1002.4338       | 668.6249        |
|         | 492.1842        | 246.5957        | 164.7329        | 4  | T      | 16 | 1836.8619       | 918.9346        | 612.9588        |
|         | 605.2682        | 303.1378        | 202.4276        | 5  | I      | 15 | 1735.8142       | 868.4107        | 579.2763        |
|         | 692.3003        | 346.6538        | 231.4383        | 6  | S      | 14 | 1622.7301       | 811.8687        | 541.5816        |
|         | 789.3530        | 395.1801        | 263.7892        | 7  | P      | 13 | 1535.6981       | 768.3527        | 512.5709        |
|         | 970.3670        | 485.6872        | 324.1272        | 8  | T[181] | 12 | 1438.6453       | 719.8263        | 480.2200        |
|         | 1071.4147       | 536.2110        | 357.8098        | 9  | T      | 11 | 1257.6313       | 629.3193        | 419.8820        |
|         | 1172.4624       | 586.7348        | 391.4923        | 10 | T      | 10 | 1156.5837       | 578.7955        | 386.1994        |
|         | 1285.5464       | 643.2769        | 429.1870        | 11 | I      | 9  | 1055.5360       | 528.2716        | 352.5168        |
|         | 1399.5894       | 700.2983        | 467.2013        | 12 | N      | 8  | 942.4519        | 471.7296        | 314.8222        |
|         | 1513.6323       | 757.3198        | 505.2156        | 13 | N      | 7  | 828.4090        | 414.7081        | 276.8078        |
|         | 1600.6643       | 800.8358        | 534.2263        | 14 | S      | 6  | 714.3661        | 357.6867        | 238.7935        |
|         | 1714.7073       | 857.8573        | 572.2406        | 15 | N      | 5  | 627.3340        | 314.1707        | 209.7829        |
|         | 1811.7600       | 906.3837        | 604.5915        | 16 | P      | 4  | 513.2911        | 257.1492        | 171.7686        |
|         | 1925.8030       | 963.4051        | 642.6058        | 17 | N      | 3  | 416.2383        | 208.6228        | 139.4176        |
|         | 2072.8714       | 1036.9393       | 691.6286        | 18 | F      | 2  | 302.1954        | 151.6013        | 101.4033        |
|         |                 |                 |                 | 19 | K[136] | 1  | 155.1270        | 78.0671         | 52.3805         |

# Annotated spectra from Saleem et. al. 2009

R.R<sub>166</sub>GT<sub>181</sub>GR<sub>166</sub>S<sub>167</sub>DENDDDLQR<sub>166</sub>A/3

0.8206

1e+04

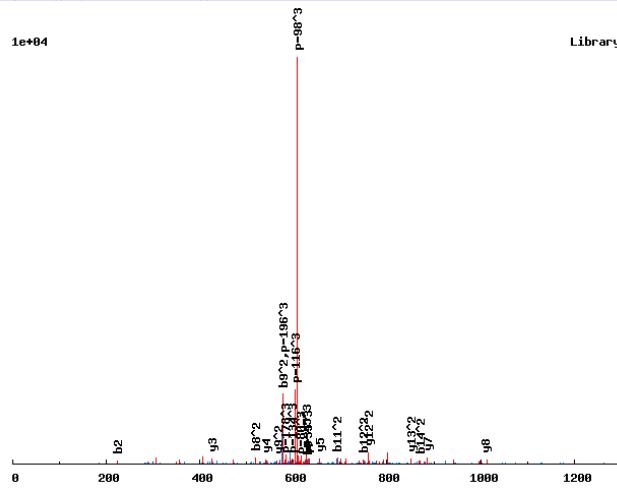

| Library | b <sup>1+</sup> | b <sup>2+</sup> | b <sup>3+</sup> | #  | AA     | #  | y <sup>1+</sup>  | y <sup>2+</sup> | y <sup>3+</sup> |
|---------|-----------------|-----------------|-----------------|----|--------|----|------------------|-----------------|-----------------|
|         | 167.1167        | 84.0620         | 56.3771         | 1  | R[166] | 15 |                  |                 |                 |
|         | <b>224.1381</b> | 112.5727        | 75.3842         | 2  | G      | 14 | 1757.6278        | 879.3175        | 586.5475        |
|         | 405.1521        | 203.0797        | 135.7222        | 3  | T[181] | 13 | 1700.6063        | <b>850.8068</b> | 567.5403        |
|         | 462.1736        | 231.5904        | 154.7294        | 4  | G      | 12 | 1519.5923        | <b>760.2998</b> | 507.2023        |
|         | <b>628.2830</b> | 314.6451        | 210.0992        | 5  | R[166] | 11 | 1462.5709        | 731.7891        | 488.1951        |
|         | 795.2813        | 398.1443        | 265.7653        | 6  | S[167] | 10 | 1296.4615        | 648.7344        | 432.8254        |
|         | 910.3083        | 455.6578        | 304.1076        | 7  | D      | 9  | 1129.4631        | <b>565.2352</b> | 377.1592        |
|         | 1039.3509       | <b>520.1791</b> | 347.1218        | 8  | E      | 8  | <b>1014.4362</b> | 507.7217        | 338.8169        |
|         | 1153.3938       | <b>577.2005</b> | 385.1361        | 9  | N      | 7  | <b>885.3936</b>  | 443.2004        | 295.8027        |
|         | 1268.4207       | 634.7140        | 423.4784        | 10 | D      | 6  | 771.3507         | 386.1790        | 257.7884        |
|         | 1383.4477       | <b>692.2275</b> | 461.8207        | 11 | D      | 5  | <b>656.3237</b>  | 328.6655        | 219.4461        |
|         | 1498.4746       | <b>749.7409</b> | 500.1631        | 12 | D      | 4  | <b>541.2968</b>  | 271.1520        | 181.1038        |
|         | 1611.5587       | 806.2830        | 537.8577        | 13 | L      | 3  | <b>426.2699</b>  | 213.6386        | 142.7615        |
|         | 1739.6173       | <b>870.3123</b> | 580.5439        | 14 | Q      | 2  | 313.1858         | 157.0965        | 105.0668        |
|         |                 |                 |                 | 15 | R[166] | 1  | 185.1272         | 93.0672         | 62.3806         |

# Annotated spectra from Saleem et. al. 2009

R.RHS<sub>167</sub>-LGLNEAK.K/3

0.9974

1e+04

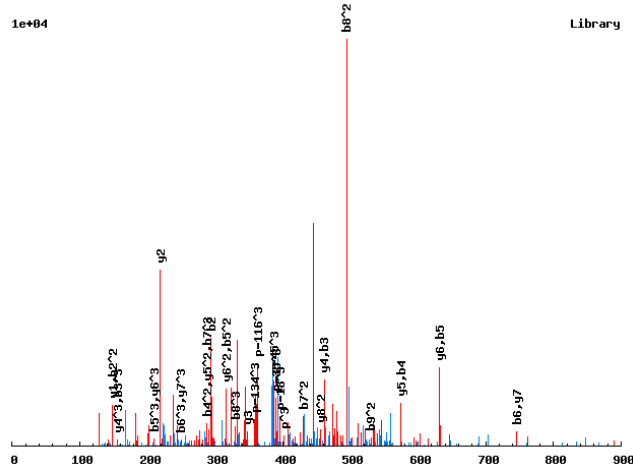

| Library | b <sup>1+</sup> | b <sup>2+</sup> | b <sup>3+</sup> | #  | AA     | #  | y <sup>1+</sup> | y <sup>2+</sup> | y <sup>3+</sup> |
|---------|-----------------|-----------------|-----------------|----|--------|----|-----------------|-----------------|-----------------|
|         | 157.1084        | 79.0578         | 53.0410         | 1  | R      | 10 |                 |                 |                 |
|         | 294.1673        | 147.5873        | 98.7273         | 2  | H      | 9  | 1048.4823       | 524.7448        | 350.1656        |
|         | 461.1657        | 231.0865        | 154.3934        | 3  | S[167] | 8  | 911.4234        | 456.2153        | 304.4793        |
|         | 574.2497        | 287.6285        | 192.0881        | 4  | L      | 7  | 744.4250        | 372.7161        | 248.8132        |
|         | 631.2712        | 316.1392        | 211.0952        | 5  | G      | 6  | 631.3410        | 316.1741        | 211.1185        |
|         | 744.3552        | 372.6813        | 248.7899        | 6  | L      | 5  | 574.3195        | 287.6634        | 192.1114        |
|         | 858.3982        | 429.7027        | 286.8042        | 7  | N      | 4  | 461.2354        | 231.1214        | 154.4167        |
|         | 987.4408        | 494.2240        | 329.8184        | 8  | E      | 3  | 347.1925        | 174.0999        | 116.4024        |
|         | 1058.4779       | 529.7426        | 353.4975        | 9  | A      | 2  | 218.1499        | 109.5786        | 73.3882         |
|         |                 |                 |                 | 10 | K      | 1  | 147.1128        | 74.0600         | 49.7091         |

# Annotated spectra from Saleem et. al. 2009

R.R<sub>166</sub>IESEGVGT<sub>181</sub>PSTS<sub>167</sub>PISSLASQK<sub>136</sub>S/3

0.9802

1e+04

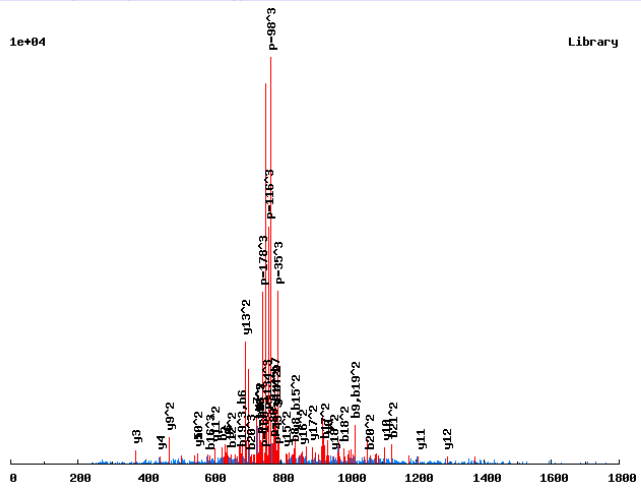

| Library | b <sup>1+</sup> | b <sup>2+</sup> | b <sup>3+</sup> | #  | AA     | #  | y <sup>1+</sup> | y <sup>2+</sup> | y <sup>3+</sup> |
|---------|-----------------|-----------------|-----------------|----|--------|----|-----------------|-----------------|-----------------|
|         | 167.1167        | 84.0620         | 56.3771         | 1  | R[166] | 22 |                 |                 |                 |
|         | 280.2007        | 140.6040        | 94.0718         | 2  | I      | 21 | 2242.9971       | 1122.0022       | 748.3372        |
|         | 409.2433        | 205.1253        | 137.0860        | 3  | E      | 20 | 2129.9130       | 1065.4602       | 710.6425        |
|         | 496.2753        | 248.6413        | 166.0966        | 4  | S      | 19 | 2000.8705       | 1000.9389       | 667.6283        |
|         | 625.3179        | 313.1626        | 209.1108        | 5  | E      | 18 | 1913.8384       | 957.4229        | 638.6177        |
|         | 682.3394        | 341.6733        | 228.1180        | 6  | G      | 17 | 1784.7958       | 892.9016        | 595.6035        |
|         | 781.4078        | 391.2075        | 261.1408        | 7  | V      | 16 | 1727.7744       | 864.3908        | 576.5963        |
|         | 838.4293        | 419.7183        | 280.1479        | 8  | G      | 15 | 1628.7060       | 814.8566        | 543.5735        |
|         | 1019.4433       | 510.2253        | 340.4859        | 9  | T[181] | 14 | 1571.6845       | 786.3459        | 524.5664        |
|         | 1116.4960       | 558.7517        | 372.8369        | 10 | P      | 13 | 1390.6705       | 695.8389        | 464.2283        |
|         | 1203.5281       | 602.2677        | 401.8475        | 11 | S      | 12 | 1293.6177       | 647.3125        | 431.8774        |
|         | 1304.5757       | 652.7915        | 435.5301        | 12 | T      | 11 | 1206.5857       | 603.7965        | 402.8668        |
|         | 1471.5741       | 736.2907        | 491.1962        | 13 | S[167] | 10 | 1105.5380       | 553.2726        | 369.1842        |
|         | 1568.6269       | 784.8171        | 523.5471        | 14 | P      | 9  | 938.5397        | 469.7735        | 313.5181        |
|         | 1681.7109       | 841.3591        | 561.2418        | 15 | I      | 8  | 841.4869        | 421.2471        | 281.1672        |
|         | 1768.7430       | 884.8751        | 590.2525        | 16 | S      | 7  | 728.4028        | 364.7051        | 243.4725        |
|         | 1855.7750       | 928.3911        | 619.2632        | 17 | S      | 6  | 641.3708        | 321.1890        | 214.4618        |
|         | 1968.8590       | 984.9332        | 656.9579        | 18 | L      | 5  | 554.3388        | 277.6730        | 185.4511        |
|         | 2039.8962       | 1020.4517       | 680.6369        | 19 | A      | 4  | 441.2547        | 221.1310        | 147.7564        |
|         | 2126.9282       | 1063.9677       | 709.6476        | 20 | S      | 3  | 370.2176        | 185.6124        | 124.0774        |
|         | 2254.9868       | 1127.9970       | 752.3338        | 21 | Q      | 2  | 283.1856        | 142.0964        | 95.0667         |
|         |                 |                 |                 | 22 | K[136] | 1  | 155.1270        | 78.0671         | 52.3805         |

# Annotated spectra from Saleem et. al. 2009

R.RIS<sub>167</sub>NS<sub>167</sub>SLLR.N/2

0.7077

1e+04

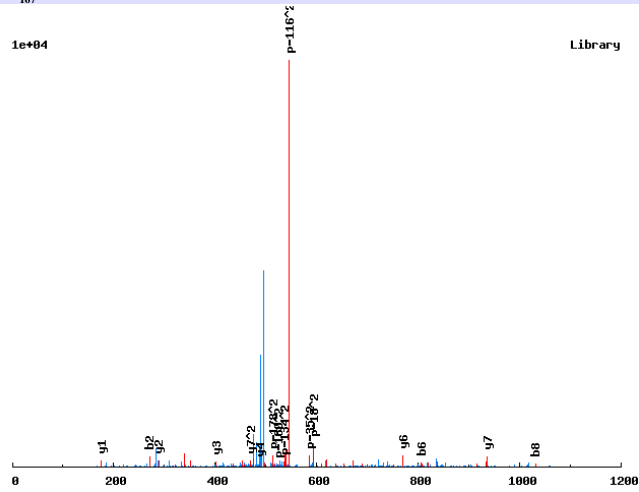

| Library | b <sup>1+</sup>  | b <sup>2+</sup> | # | AA      | # | y <sup>1+</sup> | y <sup>2+</sup> |
|---------|------------------|-----------------|---|---------|---|-----------------|-----------------|
|         | 157.1084         | 79.0578         | 1 | R       | 9 |                 |                 |
|         | <b>270.1924</b>  | 135.5999        | 2 | I       | 8 | 1049.4428       | 525.2250        |
|         | 437.1908         | 219.0990        | 3 | S [167] | 7 | <b>936.3588</b> | <b>468.6830</b> |
|         | 551.2337         | 276.1205        | 4 | N       | 6 | <b>769.3604</b> | 385.1838        |
|         | 718.2321         | 359.6197        | 5 | S [167] | 5 | 655.3175        | 328.1624        |
|         | <b>805.2641</b>  | 403.1357        | 6 | S       | 4 | <b>488.3191</b> | 244.6632        |
|         | 918.3482         | 459.6777        | 7 | L       | 3 | <b>401.2871</b> | 201.1472        |
|         | <b>1031.4323</b> | 516.2198        | 8 | L       | 2 | <b>288.2030</b> | 144.6051        |
|         |                  |                 | 9 | R       | 1 | <b>175.1190</b> | 88.0631         |

# Annotated spectra from Saleem et. al. 2009

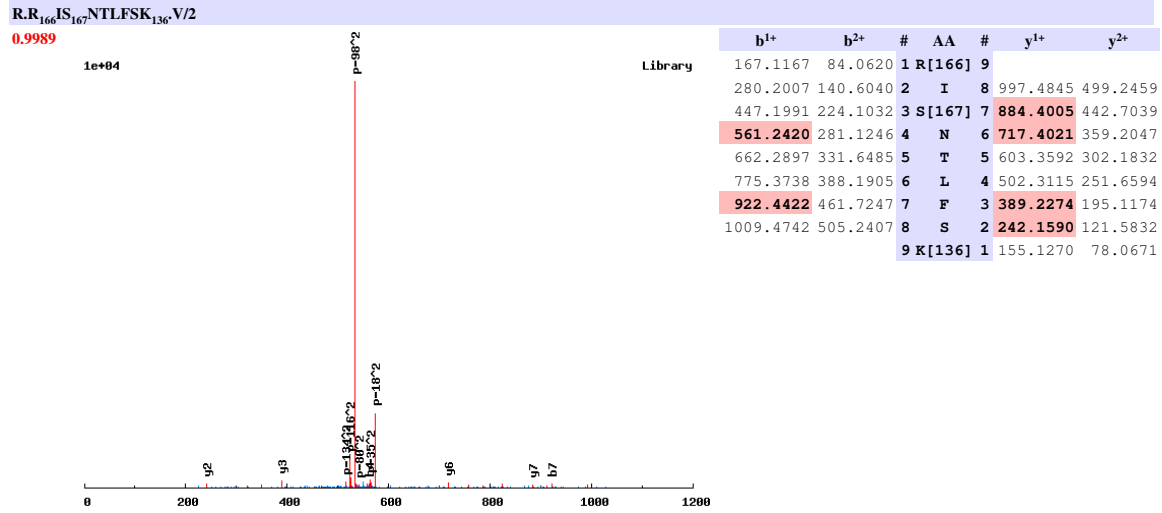

# Annotated spectra from Saleem et. al. 2009

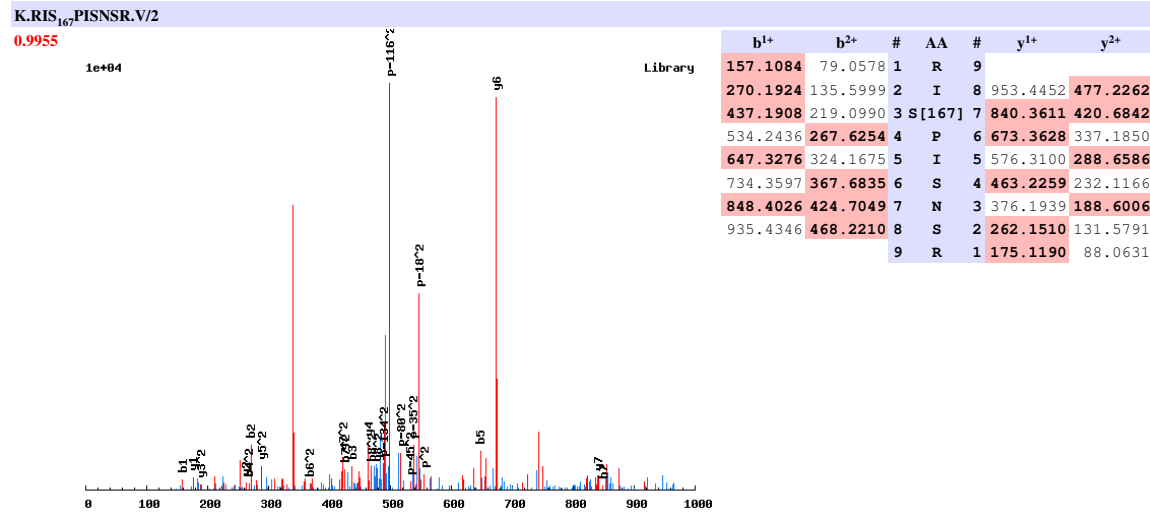



# Annotated spectra from Saleem et. al. 2009

K.RIS<sub>167</sub>PISNS<sub>167</sub>R.V/2

0.8311

1e+04

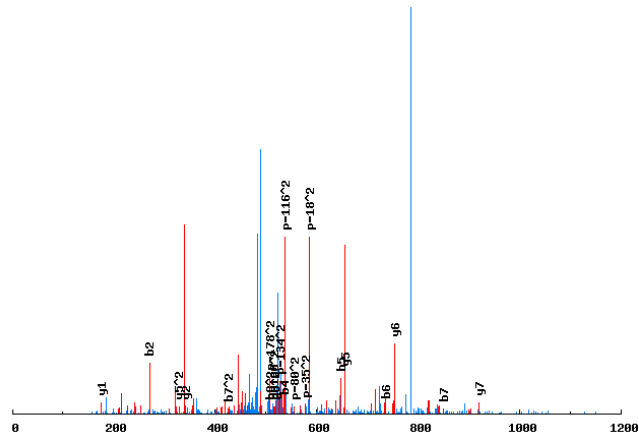

| Library | b <sup>1+</sup> | b <sup>2+</sup> | # | AA      | # | y <sup>1+</sup> | y <sup>2+</sup> |
|---------|-----------------|-----------------|---|---------|---|-----------------|-----------------|
|         | 157.1084        | 79.0578         | 1 | R       | 9 |                 |                 |
|         | <b>270.1924</b> | 135.5999        | 2 | I       | 8 | 1033.4115       | <b>517.2094</b> |
|         | 437.1908        | 219.0990        | 3 | S [167] | 7 | <b>920.3275</b> | 460.6674        |
|         | <b>534.2436</b> | 267.6254        | 4 | P       | 6 | <b>753.3291</b> | 377.1682        |
|         | <b>647.3276</b> | 324.1675        | 5 | I       | 5 | <b>656.2763</b> | <b>328.6418</b> |
|         | <b>734.3597</b> | 367.6835        | 6 | S       | 4 | 543.1923        | 272.0998        |
|         | <b>848.4026</b> | <b>424.7049</b> | 7 | N       | 3 | 456.1602        | 228.5838        |
|         | 1015.4010       | <b>508.2041</b> | 8 | S [167] | 2 | <b>342.1173</b> | 171.5623        |
|         |                 |                 | 9 | R       | 1 | <b>175.1190</b> | 88.0631         |

# Annotated spectra from Saleem et. al. 2009

K.RIT<sub>181</sub>PHLTASAAK.Q/3

0.8229

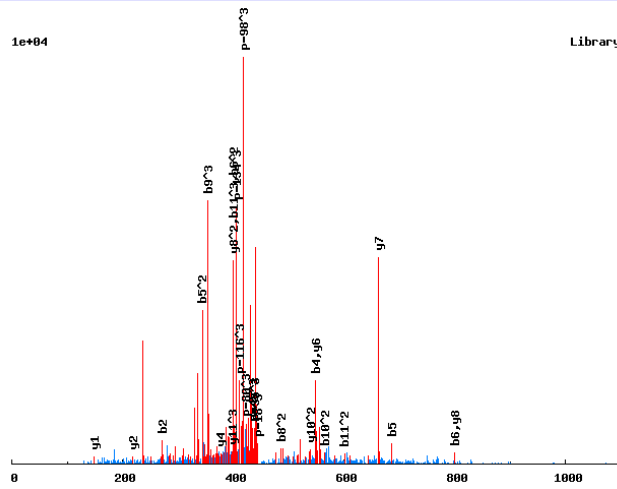

| Library | b <sup>1+</sup> | b <sup>2+</sup> | b <sup>3+</sup> | #  | AA     | #  | y <sup>1+</sup> | y <sup>2+</sup> | y <sup>3+</sup> |
|---------|-----------------|-----------------|-----------------|----|--------|----|-----------------|-----------------|-----------------|
|         | 157.1084        | 79.0578         | 53.0410         | 1  | R      | 12 |                 |                 |                 |
|         | 270.1924        | 135.5999        | 90.7357         | 2  | I      | 11 | 1189.5976       | 595.3025        | 397.2041        |
|         | 451.2065        | 226.1069        | 151.0737        | 3  | T[181] | 10 | 1076.5136       | 538.7604        | 359.5094        |
|         | 548.2592        | 274.6333        | 183.4246        | 4  | P      | 9  | 895.4996        | 448.2534        | 299.1714        |
|         | 685.3181        | 343.1627        | 229.1109        | 5  | H      | 8  | 798.4468        | 399.7270        | 266.8205        |
|         | 798.4022        | 399.7047        | 266.8056        | 6  | L      | 7  | 661.3879        | 331.1976        | 221.1342        |
|         | 899.4499        | 450.2286        | 300.4881        | 7  | T      | 6  | 548.3038        | 274.6556        | 183.4395        |
|         | 970.4870        | 485.7471        | 324.1672        | 8  | A      | 5  | 447.2562        | 224.1317        | 149.7569        |
|         | 1057.5190       | 529.2631        | 353.1779        | 9  | S      | 4  | 376.2190        | 188.6132        | 126.0779        |
|         | 1128.5561       | 564.7817        | 376.8569        | 10 | A      | 3  | 289.1870        | 145.0971        | 97.0672         |
|         | 1199.5932       | 600.3003        | 400.5359        | 11 | A      | 2  | 218.1499        | 109.5786        | 73.3882         |
|         |                 |                 |                 | 12 | K      | 1  | 147.1128        | 74.0600         | 49.7091         |

# Annotated spectra from Saleem et. al. 2009

K.R<sub>166</sub>K<sub>136</sub>LS<sub>167</sub>EDGVTGDGK<sub>136</sub>PIPESER<sub>166</sub>R/4

0.746

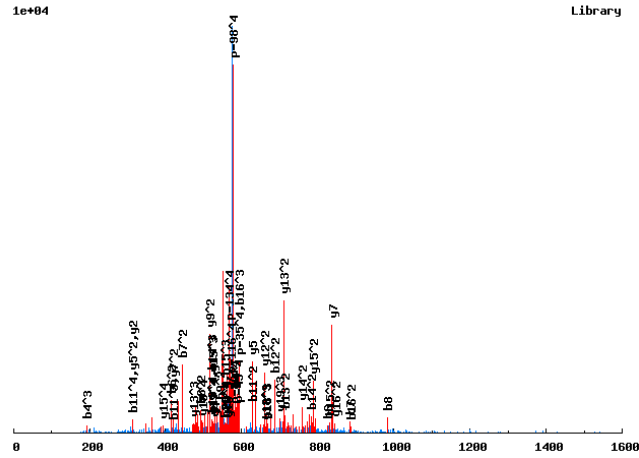

| Library | b <sup>1+</sup> | b <sup>2+</sup> | b <sup>3+</sup> | b <sup>4+</sup> | #  | AA     | #  | y <sup>1+</sup> | y <sup>2+</sup> | y <sup>3+</sup> | y <sup>4+</sup> |
|---------|-----------------|-----------------|-----------------|-----------------|----|--------|----|-----------------|-----------------|-----------------|-----------------|
|         | 167.1167        | 84.0620         | 56.3771         | 42.5346         | 1  | R[166] | 21 |                 |                 |                 |                 |
|         | 303.2258        | 152.1165        | 101.7468        | 76.5619         | 2  | K[136] | 20 | 2235.0386       | 1118.0230       | 745.6844        | 559.5151        |
|         | 416.3099        | 208.6586        | 139.4415        | 104.8329        | 3  | L      | 19 | 2098.9295       | 1049.9684       | 700.3147        | 525.4878        |
|         | 583.3082        | 292.1578        | 195.1076        | 146.5825        | 4  | S[167] | 18 | 1985.8454       | 993.4263        | 662.6200        | 497.2168        |
|         | 712.3508        | 356.6791        | 238.1218        | 178.8432        | 5  | E      | 17 | 1818.8470       | 909.9272        | 606.9539        | 455.4672        |
|         | 827.3778        | 414.1925        | 276.4641        | 207.5999        | 6  | D      | 16 | 1689.8045       | 845.4059        | 563.9397        | 423.2066        |
|         | 884.3992        | 442.7033        | 295.4713        | 221.8553        | 7  | G      | 15 | 1574.7775       | 787.8924        | 525.5974        | 394.4498        |
|         | 983.4676        | 492.2375        | 328.4941        | 246.6224        | 8  | V      | 14 | 1517.7561       | 759.3817        | 506.5902        | 380.1945        |
|         | 1084.5153       | 542.7613        | 362.1766        | 271.8843        | 9  | T      | 13 | 1418.6876       | 709.8475        | 473.5674        | 355.4274        |
|         | 1199.5423       | 600.2748        | 400.5189        | 300.6410        | 10 | D      | 12 | 1317.6400       | 659.3236        | 439.8848        | 330.1655        |
|         | 1256.5637       | 628.7855        | 419.5261        | 314.8964        | 11 | G      | 11 | 1202.6130       | 601.8102        | 401.5425        | 301.4087        |
|         | 1371.5907       | 686.2990        | 457.8684        | 343.6531        | 12 | D      | 10 | 1145.5916       | 573.2994        | 382.5354        | 287.1534        |
|         | 1428.6121       | 714.8097        | 476.8756        | 357.9085        | 13 | G      | 9  | 1030.5646       | 515.7860        | 344.1931        | 258.3966        |
|         | 1564.7213       | 782.8643        | 522.2453        | 391.9358        | 14 | K[136] | 8  | 973.5432        | 487.2752        | 325.1859        | 244.1413        |
|         | 1661.7740       | 831.3907        | 554.5962        | 416.1990        | 15 | P      | 7  | 837.4340        | 419.2206        | 279.8162        | 210.1140        |
|         | 1774.8581       | 887.9327        | 592.2909        | 444.4700        | 16 | I      | 6  | 740.3812        | 370.6943        | 247.4653        | 185.8508        |
|         | 1871.9109       | 936.4591        | 624.6418        | 468.7332        | 17 | P      | 5  | 627.2972        | 314.1522        | 209.7706        | 157.5798        |
|         | 2000.9534       | 1000.9804       | 667.6560        | 500.9938        | 18 | E      | 4  | 530.2444        | 265.6259        | 177.4197        | 133.3166        |
|         | 2087.9855       | 1044.4964       | 696.6667        | 522.7518        | 19 | S      | 3  | 401.2018        | 201.1046        | 134.4055        | 101.0559        |
|         | 2217.0281       | 1109.0177       | 739.6809        | 555.0125        | 20 | E      | 2  | 314.1698        | 157.5885        | 105.3948        | 79.2979         |
|         |                 |                 |                 |                 | 21 | R[166] | 1  | 185.1272        | 93.0672         | 62.3806         | 47.0373         |

# Annotated spectra from Saleem et. al. 2009

R.RKS<sub>167</sub>EEEPSKENPILQELK.D/3

0.9889

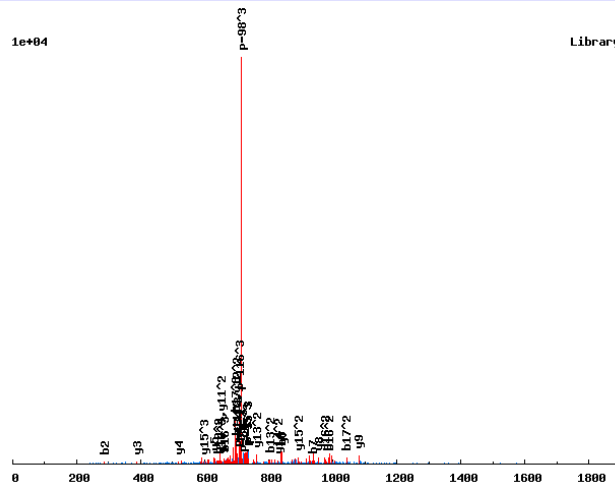

| Library | b <sup>1+</sup> | b <sup>2+</sup>  | b <sup>3+</sup> | #  | AA     | #  | y <sup>1+</sup>  | y <sup>2+</sup> | y <sup>3+</sup> |
|---------|-----------------|------------------|-----------------|----|--------|----|------------------|-----------------|-----------------|
|         | 157.1084        | 79.0578          | 53.0410         | 1  | R      | 18 |                  |                 |                 |
|         | <b>285.2033</b> | 143.1053         | 95.7393         | 2  | K      | 17 | 2078.0053        | 1039.5063       | 693.3399        |
|         | 452.2017        | 226.6045         | 151.4054        | 3  | S[167] | 16 | 1949.9103        | <b>975.4588</b> | <b>650.6416</b> |
|         | 581.2443        | 291.1258         | 194.4196        | 4  | E      | 15 | 1782.9119        | <b>891.9596</b> | <b>594.9755</b> |
|         | <b>710.2869</b> | 355.6471         | 237.4338        | 5  | E      | 14 | 1653.8694        | <b>827.4383</b> | 551.9613        |
|         | <b>839.3295</b> | 420.1684         | 280.4480        | 6  | E      | 13 | 1524.8268        | <b>762.9170</b> | 508.9471        |
|         | <b>936.3822</b> | 468.6948         | 312.7989        | 7  | P      | 12 | 1395.7842        | <b>698.3957</b> | 465.9329        |
|         | 1023.4143       | 512.2108         | 341.8096        | 8  | S      | 11 | 1298.7314        | <b>649.8693</b> | 433.5820        |
|         | 1151.5092       | 576.2583         | 384.5079        | 9  | K      | 10 | 1211.6994        | 606.3533        | 404.5713        |
|         | 1280.5518       | <b>640.7796</b>  | 427.5221        | 10 | E      | 9  | <b>1083.6044</b> | 542.3059        | 361.8730        |
|         | 1394.5948       | <b>697.8010</b>  | 465.5364        | 11 | N      | 8  | <b>954.5618</b>  | 477.7846        | 318.8588        |
|         | 1491.6475       | 746.3274         | 497.8874        | 12 | P      | 7  | <b>840.5189</b>  | 420.7631        | 280.8445        |
|         | 1604.7316       | <b>802.8694</b>  | 535.5820        | 13 | I      | 6  | 743.4662         | 372.2367        | 248.4936        |
|         | 1717.8156       | 859.4115         | 573.2767        | 14 | L      | 5  | <b>630.3821</b>  | 315.6947        | 210.7989        |
|         | 1845.8742       | 923.4407         | 615.9629        | 15 | Q      | 4  | <b>517.2980</b>  | 259.1527        | 173.1042        |
|         | 1974.9168       | <b>987.9620</b>  | <b>658.9771</b> | 16 | E      | 3  | <b>389.2394</b>  | 195.1234        | 130.4180        |
|         | 2088.0009       | <b>1044.5041</b> | <b>696.6718</b> | 17 | L      | 2  | 260.1969         | 130.6021        | 87.4038         |
|         |                 |                  |                 | 18 | K      | 1  | 147.1128         | 74.0600         | 49.7091         |

# Annotated spectra from Saleem et. al. 2009

R.R<sub>166</sub>K<sub>136</sub>S<sub>167</sub>S<sub>167</sub>LVVPPAR<sub>166</sub>-A/2

0.9742

1e+04

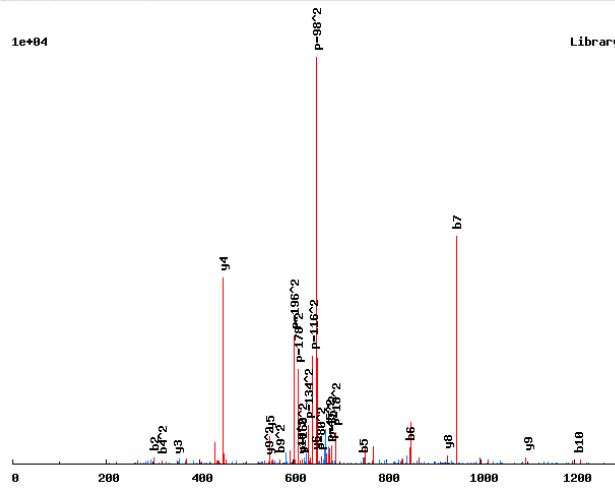

| Library | b <sup>1+</sup> | b <sup>2+</sup> | #  | AA     | #  | y <sup>1+</sup> | y <sup>2+</sup> |
|---------|-----------------|-----------------|----|--------|----|-----------------|-----------------|
|         | 167.1167        | 84.0620         | 1  | R[166] | 11 |                 |                 |
|         | 303.2258        | 152.1165        | 2  | K[136] | 10 | 1231.5966       | 616.3019        |
|         | 470.2242        | 235.6157        | 3  | S[167] | 9  | 1095.4875       | 548.2474        |
|         | 637.2225        | 319.1149        | 4  | S[167] | 8  | 928.4891        | 464.7482        |
|         | 750.3066        | 375.6569        | 5  | L      | 7  | 761.4907        | 381.2490        |
|         | 849.3750        | 425.1911        | 6  | V      | 6  | 648.4067        | 324.7070        |
|         | 948.4434        | 474.7253        | 7  | V      | 5  | 549.3383        | 275.1728        |
|         | 1045.4962       | 523.2517        | 8  | P      | 4  | 450.2698        | 225.6386        |
|         | 1142.5489       | 571.7781        | 9  | P      | 3  | 353.2171        | 177.1122        |
|         | 1213.5860       | 607.2967        | 10 | A      | 2  | 256.1643        | 128.5858        |
|         |                 |                 | 11 | R[166] | 1  | 185.1272        | 93.0672         |

# Annotated spectra from Saleem et. al. 2009

R.RKS<sub>167</sub>S<sub>167</sub>TAPDEISTK.N/3

0.9887

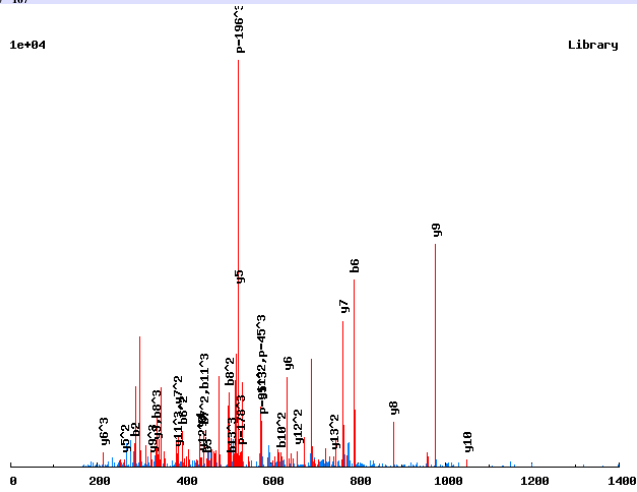

| Library | b <sup>1+</sup> | b <sup>2+</sup> | b <sup>3+</sup> | #  | AA     | #  | y <sup>1+</sup> | y <sup>2+</sup> | y <sup>3+</sup> |
|---------|-----------------|-----------------|-----------------|----|--------|----|-----------------|-----------------|-----------------|
|         | 157.1084        | 79.0578         | 53.0410         | 1  | R      | 15 |                 |                 |                 |
|         | 285.2033        | 143.1053        | 95.7393         | 2  | K      | 14 | 1611.6550       | 806.3312        | 537.8899        |
|         | 452.2017        | 226.6045        | 151.4054        | 3  | S[167] | 13 | 1483.5601       | 742.2837        | 495.1915        |
|         | 619.2001        | 310.1037        | 207.0715        | 4  | S[167] | 12 | 1316.5617       | 658.7845        | 439.5254        |
|         | 720.2478        | 360.6275        | 240.7541        | 5  | T      | 11 | 1149.5634       | 575.2853        | 383.8593        |
|         | 791.2849        | 396.1461        | 264.4331        | 6  | A      | 10 | 1048.5157       | 524.7615        | 350.1767        |
|         | 888.3376        | 444.6725        | 296.7841        | 7  | P      | 9  | 977.4786        | 489.2429        | 326.4977        |
|         | 1003.3646       | 502.1859        | 335.1264        | 8  | D      | 8  | 880.4258        | 440.7165        | 294.1468        |
|         | 1132.4072       | 566.7072        | 378.1406        | 9  | E      | 7  | 765.3989        | 383.2031        | 255.8045        |
|         | 1245.4912       | 623.2492        | 415.8353        | 10 | I      | 6  | 636.3563        | 318.6818        | 212.7903        |
|         | 1332.5232       | 666.7653        | 444.8459        | 11 | S      | 5  | 523.2722        | 262.1398        | 175.0956        |
|         | 1433.5709       | 717.2891        | 478.5285        | 12 | T      | 4  | 436.2402        | 218.6237        | 146.0849        |
|         | 1520.6030       | 760.8051        | 507.5392        | 13 | S      | 3  | 335.1925        | 168.0999        | 112.4024        |
|         | 1621.6506       | 811.3290        | 541.2217        | 14 | T      | 2  | 248.1605        | 124.5839        | 83.3917         |
|         |                 |                 |                 | 15 | K      | 1  | 147.1128        | 74.0600         | 49.7091         |

# Annotated spectra from Saleem et. al. 2009

K.RLAS<sub>167</sub>QVS<sub>167</sub>LSEGLK.V/2

0.9999

1e+04

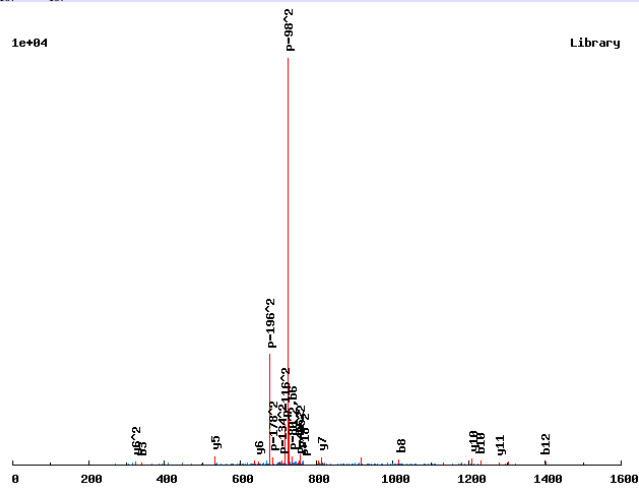

| Library | b <sup>1+</sup> | b <sup>2+</sup> | #  | AA     | #  | y <sup>1+</sup> | y <sup>2+</sup> |
|---------|-----------------|-----------------|----|--------|----|-----------------|-----------------|
|         | 157.1084        | 79.0578         | 1  | R      | 13 |                 |                 |
|         | 270.1924        | 135.5999        | 2  | L      | 12 | 1391.6219       | 696.3146        |
|         | 341.2296        | 171.1184        | 3  | A      | 11 | 1278.5378       | 639.7726        |
|         | 508.2279        | 254.6176        | 4  | S[167] | 10 | 1207.5007       | 604.2540        |
|         | 636.2865        | 318.6469        | 5  | Q      | 9  | 1040.5024       | 520.7548        |
|         | 735.3549        | 368.1811        | 6  | V      | 8  | 912.4438        | 456.7255        |
|         | 902.3533        | 451.6803        | 7  | S[167] | 7  | 813.3754        | 407.1913        |
|         | 1015.4373       | 508.2223        | 8  | L      | 6  | 646.3770        | 323.6921        |
|         | 1102.4694       | 551.7383        | 9  | S      | 5  | 533.2929        | 267.1501        |
|         | 1231.5120       | 616.2596        | 10 | E      | 4  | 446.2609        | 223.6341        |
|         | 1288.5334       | 644.7703        | 11 | G      | 3  | 317.2183        | 159.1128        |
|         | 1401.6175       | 701.3124        | 12 | L      | 2  | 260.1969        | 130.6021        |
|         |                 |                 | 13 | K      | 1  | 147.1128        | 74.0600         |

Annotated spectra from Saleem et. al. 2009

R.RLDDGDS<sub>167</sub>DDENLDVNHISR.V/3

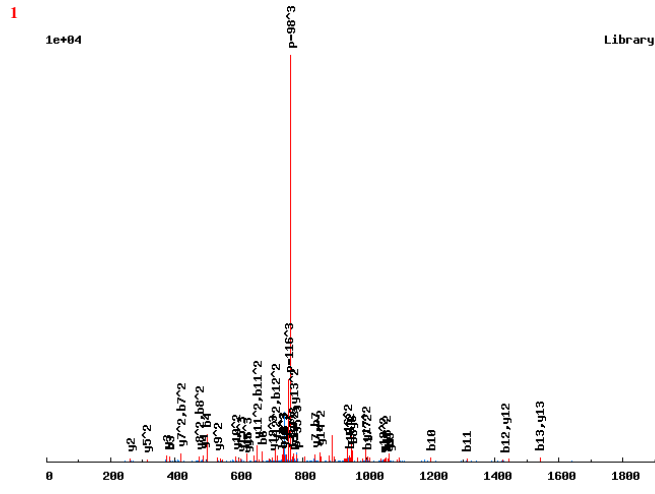

| Library | b <sup>1+</sup> | b <sup>2+</sup> | b <sup>3+</sup> | #  | AA     | #  | y <sup>1+</sup> | y <sup>2+</sup> | y <sup>3+</sup> |
|---------|-----------------|-----------------|-----------------|----|--------|----|-----------------|-----------------|-----------------|
|         | 157.1084        | 79.0578         | 53.0410         | 1  | R      | 20 |                 |                 |                 |
|         | 270.1924        | 135.5999        | 90.7357         | 2  | L      | 19 | 2221.9245       | 1111.4659       | 741.3130        |
|         | 385.2194        | 193.1133        | 129.0780        | 3  | D      | 18 | 2108.8404       | 1054.9238       | 703.6183        |
|         | 500.2463        | 250.6268        | 167.4203        | 4  | D      | 17 | 1993.8135       | 997.4104        | 665.2760        |
|         | 557.2678        | 279.1375        | 186.4275        | 5  | G      | 16 | 1878.7865       | 939.8969        | 626.9337        |
|         | 672.2947        | 336.6510        | 224.7698        | 6  | D      | 15 | 1821.7651       | 911.3862        | 607.9265        |
|         | 839.2931        | 420.1502        | 280.4359        | 7  | S[167] | 14 | 1706.7381       | 853.8727        | 569.5842        |
|         | 954.3200        | 477.6637        | 318.7782        | 8  | D      | 13 | 1539.7397       | 770.3735        | 513.9181        |
|         | 1069.3470       | 535.1771        | 357.1205        | 9  | D      | 12 | 1424.7128       | 712.8600        | 475.5758        |
|         | 1198.3896       | 599.6984        | 400.1347        | 10 | E      | 11 | 1309.6859       | 655.3466        | 437.2335        |
|         | 1312.4325       | 656.7199        | 438.1490        | 11 | N      | 10 | 1180.6433       | 590.8253        | 394.2193        |
|         | 1425.5166       | 713.2619        | 475.8437        | 12 | L      | 9  | 1066.6003       | 533.8038        | 356.2050        |
|         | 1540.5435       | 770.7754        | 514.1860        | 13 | D      | 8  | 953.5163        | 477.2618        | 318.5103        |
|         | 1639.6119       | 820.3096        | 547.2088        | 14 | V      | 7  | 838.4894        | 419.7483        | 280.1680        |
|         | 1753.6548       | 877.3311        | 585.2231        | 15 | N      | 6  | 739.4209        | 370.2141        | 247.1452        |
|         | 1890.7137       | 945.8605        | 630.9094        | 16 | H      | 5  | 625.3780        | 313.1926        | 209.1309        |
|         | 2003.7978       | 1002.4025       | 668.6041        | 17 | I      | 4  | 488.3191        | 244.6632        | 163.4446        |
|         | 2116.8819       | 1058.9446       | 706.2988        | 18 | I      | 3  | 375.2350        | 188.1212        | 125.7499        |
|         | 2203.9139       | 1102.4606       | 735.3095        | 19 | S      | 2  | 262.1510        | 131.5791        | 88.0552         |
|         |                 |                 |                 | 20 | R      | 1  | 175.1190        | 88.0631         | 59.0445         |



# Annotated spectra from Saleem et. al. 2009

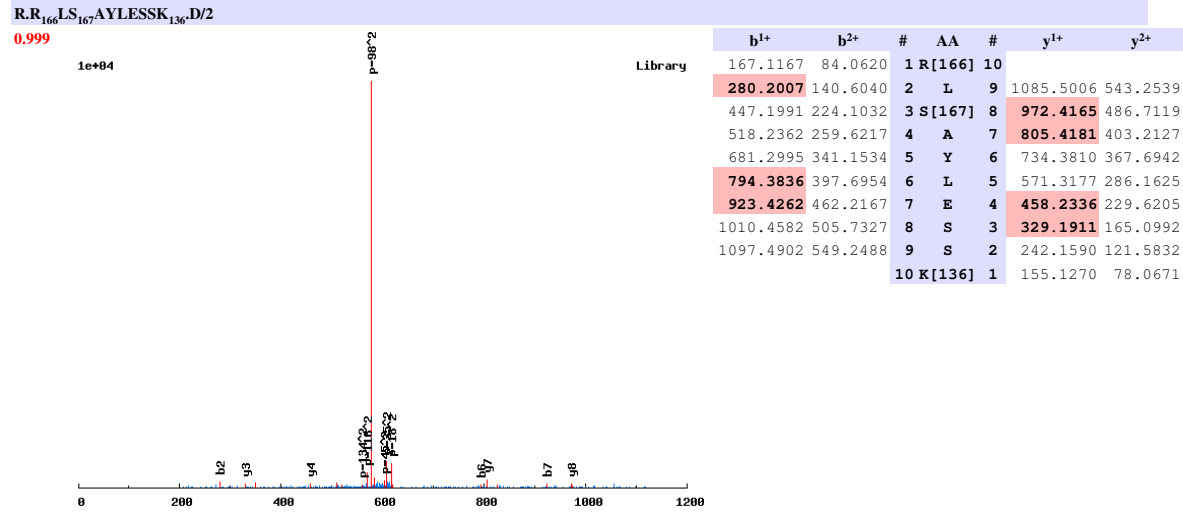

# Annotated spectra from Saleem et. al. 2009

R.RLS<sub>167</sub>DLQQYHL-/-2

0.9825

1e+04

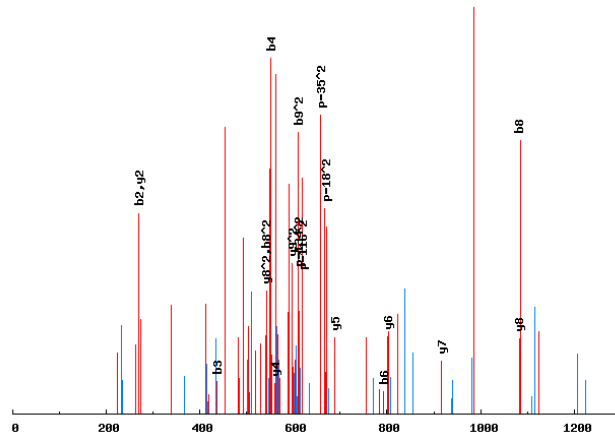

| Library | b <sup>1+</sup>  | b <sup>2+</sup> | #  | AA     | #  | y <sup>1+</sup>  | y <sup>2+</sup> |
|---------|------------------|-----------------|----|--------|----|------------------|-----------------|
|         | 157.1084         | 79.0578         | 1  | R      | 10 |                  |                 |
|         | <b>270.1924</b>  | 135.5999        | 2  | L      | 9  | 1196.5347        | <b>598.7710</b> |
|         | <b>437.1908</b>  | 219.0990        | 3  | S[167] | 8  | <b>1083.4507</b> | <b>542.2290</b> |
|         | <b>552.2178</b>  | 276.6125        | 4  | D      | 7  | <b>916.4523</b>  | 458.7298        |
|         | 665.3018         | 333.1545        | 5  | L      | 6  | <b>801.4254</b>  | 401.2163        |
|         | <b>793.3604</b>  | 397.1838        | 6  | Q      | 5  | <b>688.3413</b>  | 344.6743        |
|         | 921.4190         | 461.2131        | 7  | Q      | 4  | <b>560.2827</b>  | 280.6450        |
|         | <b>1084.4823</b> | <b>542.7448</b> | 8  | Y      | 3  | 432.2241         | 216.6157        |
|         | 1221.5412        | <b>611.2742</b> | 9  | H      | 2  | <b>269.1608</b>  | 135.0840        |
|         |                  |                 | 10 | I      | 1  | 132.1019         | 66.5546         |

# Annotated spectra from Saleem et. al. 2009

K.RLS<sub>167</sub>S<sub>167</sub>PLTDSGNRR.T/3

0.847

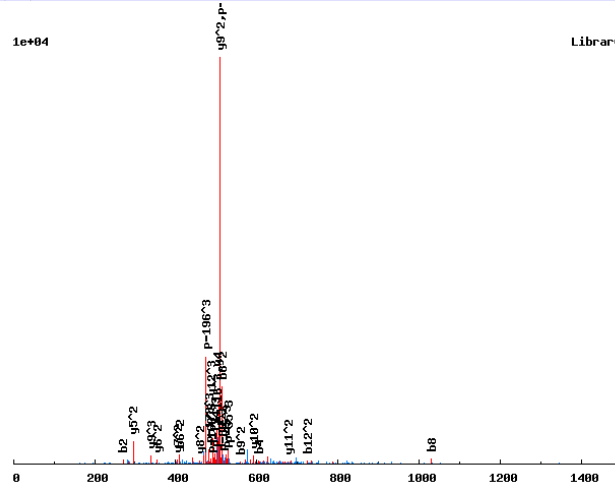

| Library | b <sup>1+</sup>  | b <sup>2+</sup> | b <sup>3+</sup> | #  | AA     | #  | y <sup>1+</sup> | y <sup>2+</sup> | y <sup>3+</sup> |
|---------|------------------|-----------------|-----------------|----|--------|----|-----------------|-----------------|-----------------|
|         | 157.1084         | 79.0578         | 53.0410         | 1  | R      | 13 |                 |                 |                 |
|         | <b>270.1924</b>  | 135.5999        | 90.7357         | 2  | L      | 12 | 1462.6087       | 731.8080        | <b>488.2078</b> |
|         | 437.1908         | 219.0990        | 146.4018        | 3  | S[167] | 11 | 1349.5246       | <b>675.2660</b> | 450.5131        |
|         | <b>604.1892</b>  | 302.5982        | 202.0679        | 4  | S[167] | 10 | 1182.5263       | <b>591.7668</b> | 394.8469        |
|         | 701.2419         | 351.1246        | 234.4188        | 5  | P      | 9  | 1015.5279       | <b>508.2676</b> | <b>339.1808</b> |
|         | 814.3260         | <b>407.6666</b> | 272.1135        | 6  | L      | 8  | 918.4752        | <b>459.7412</b> | 306.8299        |
|         | 915.3737         | 458.1905        | 305.7961        | 7  | T      | 7  | 805.3911        | <b>403.1992</b> | 269.1352        |
|         | <b>1030.4006</b> | <b>515.7039</b> | 344.1384        | 8  | D      | 6  | 704.3434        | <b>352.6754</b> | 235.4527        |
|         | 1117.4326        | <b>559.2200</b> | 373.1491        | 9  | S      | 5  | 589.3165        | <b>295.1619</b> | 197.1103        |
|         | 1174.4541        | 587.7307        | 392.1562        | 10 | G      | 4  | <b>502.2844</b> | 251.6459        | 168.0997        |
|         | 1288.4970        | 644.7522        | 430.1705        | 11 | N      | 3  | 445.2630        | 223.1351        | 149.0925        |
|         | 1444.5981        | <b>722.8027</b> | 482.2042        | 12 | R      | 2  | 331.2201        | 166.1137        | 111.0782        |
|         |                  |                 |                 | 13 | R      | 1  | 175.1190        | 88.0631         | 59.0445         |

# Annotated spectra from Saleem et. al. 2009

R.R<sub>166</sub>LS<sub>167</sub>SSS<sub>167</sub>MEPATNK<sub>136</sub>D/2

0.9863

1e+04

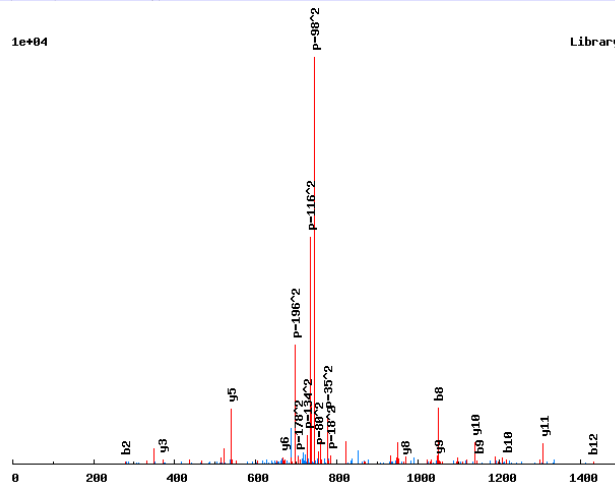

| Library | b <sup>1+</sup>  | b <sup>2+</sup> | #  | AA     | #  | y <sup>1+</sup>  | y <sup>2+</sup> |
|---------|------------------|-----------------|----|--------|----|------------------|-----------------|
|         | 167.1167         | 84.0620         | 1  | R[166] | 13 |                  |                 |
|         | <b>280.2007</b>  | 140.6040        | 2  | L      | 12 | 1419.5354        | 710.2713        |
|         | 447.1991         | 224.1032        | 3  | S[167] | 11 | <b>1306.4513</b> | 653.7293        |
|         | 534.2311         | 267.6192        | 4  | S      | 10 | <b>1139.4530</b> | 570.2301        |
|         | 621.2631         | 311.1352        | 5  | S      | 9  | <b>1052.4209</b> | 526.7141        |
|         | 788.2615         | 394.6344        | 6  | S[167] | 8  | <b>965.3889</b>  | 483.1981        |
|         | 919.3020         | 460.1546        | 7  | M      | 7  | 798.3906         | 399.6989        |
|         | <b>1048.3446</b> | 524.6759        | 8  | E      | 6  | <b>667.3501</b>  | 334.1787        |
|         | <b>1145.3973</b> | 573.2023        | 9  | P      | 5  | <b>538.3075</b>  | 269.6574        |
|         | <b>1216.4345</b> | 608.7209        | 10 | A      | 4  | 441.2547         | 221.1310        |
|         | 1317.4821        | 659.2447        | 11 | T      | 3  | <b>370.2176</b>  | 185.6124        |
|         | <b>1431.5251</b> | 716.2662        | 12 | N      | 2  | 269.1699         | 135.0886        |
|         |                  |                 | 13 | K[136] | 1  | 155.1270         | 78.0671         |

# Annotated spectra from Saleem et. al. 2009

R.RLS<sub>167</sub>SVVTTSPDK.A/2

0.6508

1e+04

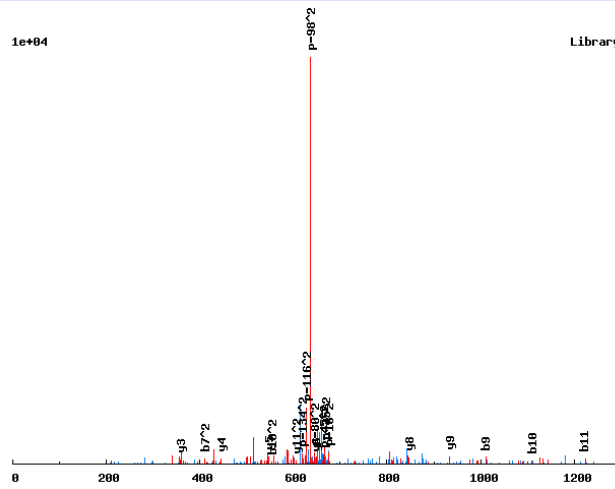

| Library | b <sup>1+</sup> | b <sup>2+</sup> | #  | AA     | #  | y <sup>1+</sup> | y <sup>2+</sup> |
|---------|-----------------|-----------------|----|--------|----|-----------------|-----------------|
|         | 157.1084        | 79.0578         | 1  | R      | 12 |                 |                 |
|         | 270.1924        | 135.5999        | 2  | L      | 11 | 1213.5712       | 607.2892        |
|         | 437.1908        | 219.0990        | 3  | S[167] | 10 | 1100.4871       | 550.7472        |
|         | 524.2228        | 262.6151        | 4  | S      | 9  | 933.4887        | 467.2480        |
|         | 623.2913        | 312.1493        | 5  | V      | 8  | 846.4567        | 423.7320        |
|         | 722.3597        | 361.6835        | 6  | V      | 7  | 747.3883        | 374.1978        |
|         | 823.4073        | 412.2073        | 7  | T      | 6  | 648.3199        | 324.6636        |
|         | 924.4550        | 462.7312        | 8  | T      | 5  | 547.2722        | 274.1397        |
|         | 1011.4871       | 506.2472        | 9  | S      | 4  | 446.2245        | 223.6159        |
|         | 1108.5398       | 554.7735        | 10 | P      | 3  | 359.1925        | 180.0999        |
|         | 1223.5668       | 612.2870        | 11 | D      | 2  | 262.1397        | 131.5735        |
|         |                 |                 | 12 | K      | 1  | 147.1128        | 74.0600         |

# Annotated spectra from Saleem et. al. 2009

R.R<sub>166</sub>LS<sub>167</sub>SVVTTIS<sub>167</sub>PDK<sub>136</sub>-A/2

0.9628

1e+04

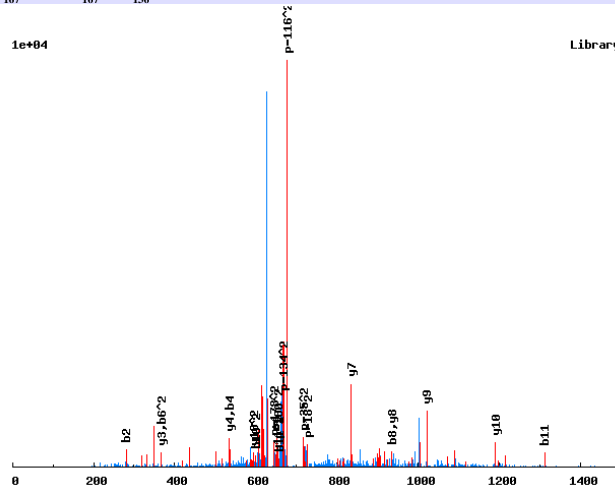

| Library | b <sup>1+</sup> | b <sup>2+</sup> | #  | AA     | #  | y <sup>1+</sup> | y <sup>2+</sup> |
|---------|-----------------|-----------------|----|--------|----|-----------------|-----------------|
|         | 167.1167        | 84.0620         | 1  | R[166] | 12 |                 |                 |
|         | 280.2007        | 140.6040        | 2  | L      | 11 | 1301.5517       | 651.2795        |
|         | 447.1991        | 224.1032        | 3  | S[167] | 10 | 1188.4676       | 594.7375        |
|         | 534.2311        | 267.6192        | 4  | S      | 9  | 1021.4693       | 511.2383        |
|         | 633.2995        | 317.1534        | 5  | V      | 8  | 934.4372        | 467.7223        |
|         | 732.3679        | 366.6876        | 6  | V      | 7  | 835.3688        | 418.1881        |
|         | 833.4156        | 417.2114        | 7  | T      | 6  | 736.3004        | 368.6539        |
|         | 934.4633        | 467.7353        | 8  | T      | 5  | 635.2527        | 318.1300        |
|         | 1101.4617       | 551.2345        | 9  | S[167] | 4  | 534.2051        | 267.6062        |
|         | 1198.5144       | 599.7608        | 10 | P      | 3  | 367.2067        | 184.1070        |
|         | 1313.5414       | 657.2743        | 11 | D      | 2  | 270.1539        | 135.5806        |
|         |                 |                 | 12 | K[136] | 1  | 155.1270        | 78.0671         |

# Annotated spectra from Saleem et. al. 2009

R.R<sub>166</sub>LS<sub>167</sub>TSS<sub>167</sub>AAPPTSR<sub>166</sub>-A/2

0.9987

1e+04

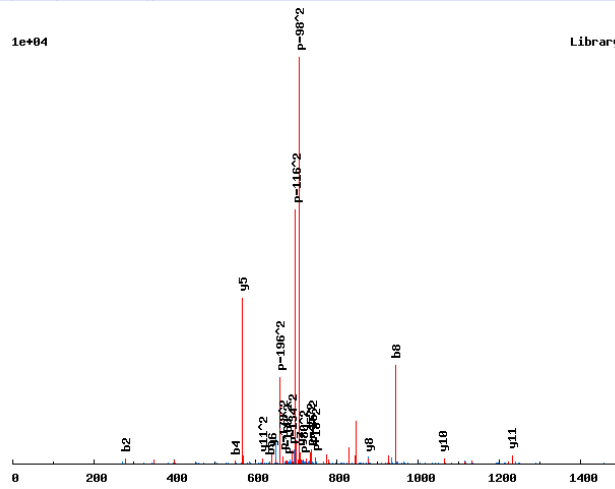

| Library | b <sup>1+</sup> | b <sup>2+</sup> | #  | AA     | #  | y <sup>1+</sup> | y <sup>2+</sup> |
|---------|-----------------|-----------------|----|--------|----|-----------------|-----------------|
|         | 167.1167        | 84.0620         | 1  | R[166] | 13 |                 |                 |
|         | 280.2007        | 140.6040        | 2  | L      | 12 | 1344.5472       | 672.7772        |
|         | 447.1991        | 224.1032        | 3  | S[167] | 11 | 1231.4631       | 616.2352        |
|         | 548.2468        | 274.6270        | 4  | T      | 10 | 1064.4647       | 532.7360        |
|         | 635.2788        | 318.1430        | 5  | S      | 9  | 963.4171        | 482.2122        |
|         | 802.2772        | 401.6422        | 6  | S[167] | 8  | 876.3850        | 438.6962        |
|         | 873.3143        | 437.1608        | 7  | A      | 7  | 709.3867        | 355.1970        |
|         | 944.3514        | 472.6793        | 8  | A      | 6  | 638.3496        | 319.6784        |
|         | 1041.4041       | 521.2057        | 9  | P      | 5  | 567.3124        | 284.1599        |
|         | 1138.4569       | 569.7321        | 10 | P      | 4  | 470.2597        | 235.6335        |
|         | 1239.5046       | 620.2559        | 11 | T      | 3  | 373.2069        | 187.1071        |
|         | 1326.5366       | 663.7719        | 12 | S      | 2  | 272.1592        | 136.5833        |
|         |                 |                 | 13 | R[166] | 1  | 185.1272        | 93.0672         |

# Annotated spectra from Saleem et. al. 2009

R.R<sub>166</sub>LS<sub>167</sub>TS<sub>167</sub>SSPSSPMSAQR<sub>166</sub>R/3

0.9943

1e+04

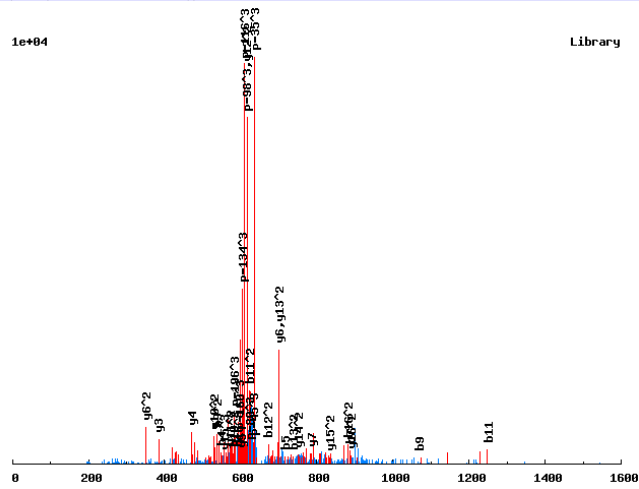

| Library | b <sup>1+</sup> | b <sup>2+</sup> | b <sup>3+</sup> | #  | AA     | #  | y <sup>1+</sup> | y <sup>2+</sup> | y <sup>3+</sup> |
|---------|-----------------|-----------------|-----------------|----|--------|----|-----------------|-----------------|-----------------|
|         | 167.1167        | 84.0620         | 56.3771         | 1  | R[166] | 17 |                 |                 |                 |
|         | 280.2007        | 140.6040        | 94.0718         | 2  | L      | 16 | 1779.6896       | 890.3484        | 593.9014        |
|         | 447.1991        | 224.1032        | 149.7379        | 3  | S[167] | 15 | 1666.6055       | 833.8064        | 556.2067        |
|         | 548.2468        | 274.6270        | 183.4204        | 4  | T      | 14 | 1499.6071       | 750.3072        | 500.5406        |
|         | 715.2451        | 358.1262        | 239.0866        | 5  | S[167] | 13 | 1398.5595       | 699.7834        | 466.8580        |
|         | 802.2772        | 401.6422        | 268.0972        | 6  | S      | 12 | 1231.5611       | 616.2842        | 411.1919        |
|         | 889.3092        | 445.1582        | 297.1079        | 7  | S      | 11 | 1144.5291       | 572.7682        | 382.1812        |
|         | 986.3619        | 493.6846        | 329.4588        | 8  | P      | 10 | 1057.4970       | 529.2522        | 353.1705        |
|         | 1073.3940       | 537.2006        | 358.4695        | 9  | S      | 9  | 960.4443        | 480.7258        | 320.8196        |
|         | 1160.4260       | 580.7166        | 387.4802        | 10 | S      | 8  | 873.4122        | 437.2098        | 291.8089        |
|         | 1247.4580       | 624.2327        | 416.4909        | 11 | S      | 7  | 786.3802        | 393.6937        | 262.7983        |
|         | 1344.5108       | 672.7590        | 448.8418        | 12 | P      | 6  | 699.3482        | 350.1777        | 233.7876        |
|         | 1475.5513       | 738.2793        | 492.5219        | 13 | M      | 5  | 602.2954        | 301.6514        | 201.4367        |
|         | 1562.5833       | 781.7953        | 521.5326        | 14 | S      | 4  | 471.2549        | 236.1311        | 157.7565        |
|         | 1633.6204       | 817.3139        | 545.2117        | 15 | A      | 3  | 384.2229        | 192.6151        | 128.7458        |
|         | 1761.6790       | 881.3431        | 587.8979        | 16 | Q      | 2  | 313.1858        | 157.0965        | 105.0668        |
|         |                 |                 |                 | 17 | R[166] | 1  | 185.1272        | 93.0672         | 62.3806         |



# Annotated spectra from Saleem et. al. 2009

K.RLVAAPT<sub>181</sub>VS<sub>167</sub>PPK.I/2

0.9622

1e+04

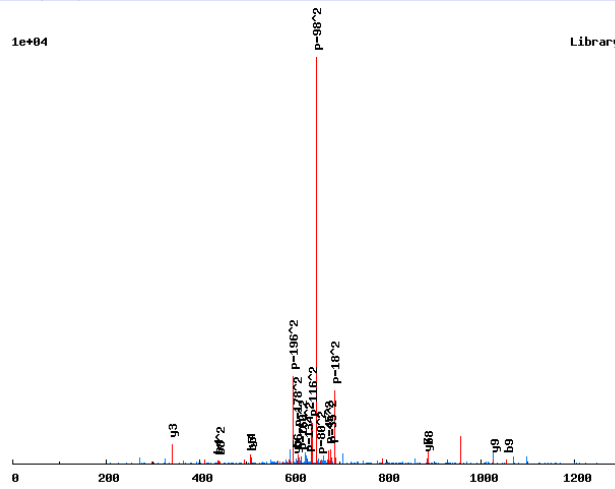

| Library | b <sup>1+</sup> | b <sup>2+</sup> | #  | AA     | #  | y <sup>1+</sup> | y <sup>2+</sup> |
|---------|-----------------|-----------------|----|--------|----|-----------------|-----------------|
|         | 157.1084        | 79.0578         | 1  | R      | 12 |                 |                 |
|         | 270.1924        | 135.5999        | 2  | L      | 11 | 1239.5786       | 620.2929        |
|         | 369.2609        | 185.1341        | 3  | V      | 10 | 1126.4945       | 563.7509        |
|         | 440.2980        | 220.6526        | 4  | A      | 9  | 1027.4261       | 514.2167        |
|         | 511.3351        | 256.1712        | 5  | A      | 8  | 956.3890        | 478.6981        |
|         | 608.3878        | 304.6976        | 6  | P      | 7  | 885.3519        | 443.1796        |
|         | 789.4019        | 395.2046        | 7  | T[181] | 6  | 788.2991        | 394.6532        |
|         | 888.4703        | 444.7388        | 8  | V      | 5  | 607.2851        | 304.1462        |
|         | 1055.4686       | 528.2380        | 9  | S[167] | 4  | 508.2167        | 254.6120        |
|         | 1152.5214       | 576.7643        | 10 | P      | 3  | 341.2183        | 171.1128        |
|         | 1249.5741       | 625.2907        | 11 | P      | 2  | 244.1656        | 122.5864        |
|         |                 |                 | 12 | K      | 1  | 147.1128        | 74.0600         |

# Annotated spectra from Saleem et. al. 2009

K.R.L.V.E.D.V.E.P.S.E.M.P.E.K.G.A.S.<sub>167</sub>V.E.S.<sub>167</sub>V.R.K/3

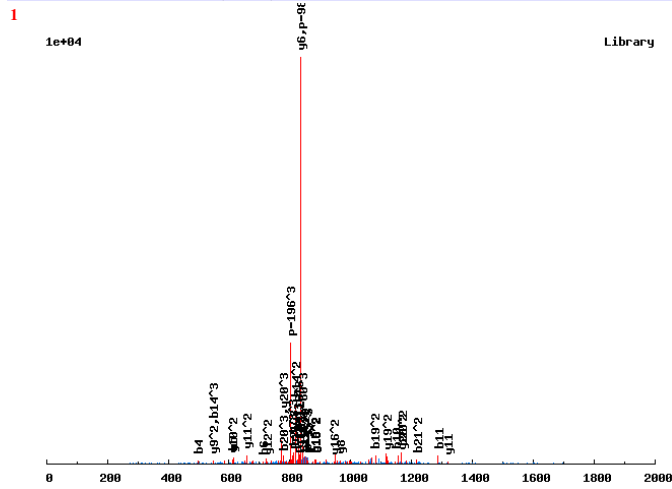

| Library | b <sup>1+</sup>  | b <sup>2+</sup>  | b <sup>3+</sup> | #  | AA     | #  | y <sup>1+</sup>  | y <sup>2+</sup>  | y <sup>3+</sup> |
|---------|------------------|------------------|-----------------|----|--------|----|------------------|------------------|-----------------|
|         | 157.1084         | 79.0578          | 53.0410         | 1  | R      | 22 |                  |                  |                 |
|         | 270.1924         | 135.5999         | 90.7357         | 2  | L      | 21 | 2447.0448        | 1224.0261        | 816.3531        |
|         | 369.2609         | 185.1341         | 123.7585        | 3  | V      | 20 | 2333.9608        | <b>1167.4840</b> | <b>778.6584</b> |
|         | <b>498.3034</b>  | 249.6554         | 166.7727        | 4  | E      | 19 | 2234.8924        | <b>1117.9498</b> | 745.6356        |
|         | <b>613.3304</b>  | 307.1688         | 205.1150        | 5  | D      | 18 | 2105.8498        | 1053.4285        | 702.6214        |
|         | <b>712.3988</b>  | 356.7030         | 238.1378        | 6  | V      | 17 | 1990.8228        | 995.9151         | 664.2791        |
|         | <b>841.4414</b>  | 421.2243         | 281.1520        | 7  | E      | 16 | 1891.7544        | <b>946.3809</b>  | 631.2563        |
|         | 938.4941         | 469.7507         | 313.5029        | 8  | P      | 15 | 1762.7118        | <b>881.8596</b>  | 588.2421        |
|         | 1025.5262        | 513.2667         | 342.5136        | 9  | S      | 14 | 1665.6591        | <b>833.3332</b>  | 555.8912        |
|         | <b>1154.5688</b> | 577.7880         | 385.5278        | 10 | E      | 13 | 1578.6270        | 789.8172         | 526.8805        |
|         | <b>1285.6093</b> | 643.3083         | 429.2079        | 11 | M      | 12 | 1449.5845        | <b>725.2959</b>  | 483.8663        |
|         | 1382.6620        | 691.8347         | 461.5589        | 12 | P      | 11 | <b>1318.5440</b> | <b>659.7756</b>  | 440.1862        |
|         | 1511.7046        | 756.3559         | 504.5731        | 13 | E      | 10 | 1221.4912        | <b>611.2492</b>  | 407.8353        |
|         | 1639.7996        | <b>820.4034</b>  | <b>547.2714</b> | 14 | K      | 9  | 1092.4486        | <b>546.7279</b>  | 364.8211        |
|         | 1696.8210        | <b>848.9142</b>  | 566.2785        | 15 | G      | 8  | <b>964.3537</b>  | 482.6805         | 322.1227        |
|         | 1767.8581        | <b>884.4327</b>  | 589.9576        | 16 | A      | 7  | 907.3322         | 454.1697         | 303.1156        |
|         | 1934.8565        | 967.9319         | 645.6237        | 17 | S[167] | 6  | <b>836.2951</b>  | 418.6512         | 279.4365        |
|         | 2033.9249        | 1017.4661        | 678.6465        | 18 | V      | 5  | 669.2967         | 335.1520         | 223.7704        |
|         | 2162.9675        | <b>1081.9874</b> | 721.6607        | 19 | E      | 4  | 570.2283         | 285.6178         | 190.7476        |
|         | 2329.9659        | <b>1165.4866</b> | <b>777.3268</b> | 20 | S[167] | 3  | 441.1857         | 221.0965         | 147.7334        |
|         | 2429.0343        | <b>1215.0208</b> | <b>810.3496</b> | 21 | V      | 2  | 274.1874         | 137.5973         | 92.0673         |
|         |                  |                  |                 | 22 | R      | 1  | 175.1190         | 88.0631          | 59.0445         |

# Annotated spectra from Saleem et. al. 2009

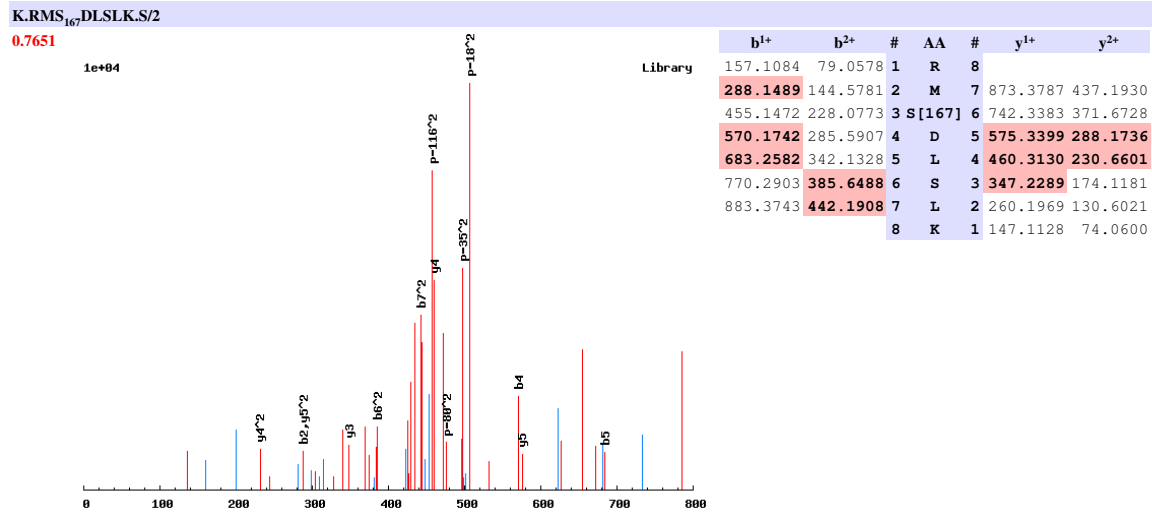

# Annotated spectra from Saleem et. al. 2009

R.R<sub>166</sub>M<sub>147</sub>S<sub>167</sub>SS<sub>167</sub>SGGDSISR<sub>166</sub>Q/2

0.8386

1e+04

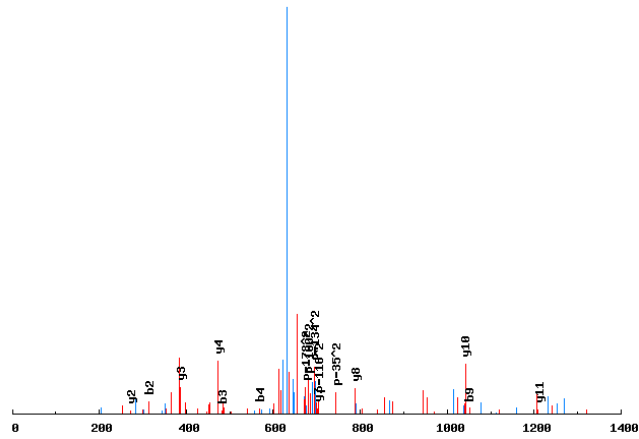

| Library | b <sup>1+</sup> | b <sup>2+</sup> | #  | AA     | #  | y <sup>1+</sup> | y <sup>2+</sup> |
|---------|-----------------|-----------------|----|--------|----|-----------------|-----------------|
|         | 167.1167        | 84.0620         | 1  | R[166] | 13 |                 |                 |
|         | 314.1521        | 157.5797        | 2  | M[147] | 12 | 1356.4414       | 678.7243        |
|         | 481.1504        | 241.0788        | 3  | S[167] | 11 | 1209.4060       | 605.2066        |
|         | 568.1825        | 284.5949        | 4  | S      | 10 | 1042.4076       | 521.7075        |
|         | 735.1808        | 368.0940        | 5  | S[167] | 9  | 955.3756        | 478.1914        |
|         | 822.2128        | 411.6101        | 6  | S      | 8  | 788.3772        | 394.6923        |
|         | 879.2343        | 440.1208        | 7  | G      | 7  | 701.3452        | 351.1762        |
|         | 936.2558        | 468.6315        | 8  | G      | 6  | 644.3237        | 322.6655        |
|         | 1051.2827       | 526.1450        | 9  | D      | 5  | 587.3023        | 294.1548        |
|         | 1138.3147       | 569.6610        | 10 | S      | 4  | 472.2753        | 236.6413        |
|         | 1251.3988       | 626.2030        | 11 | I      | 3  | 385.2433        | 193.1253        |
|         | 1338.4308       | 669.7191        | 12 | S      | 2  | 272.1592        | 136.5833        |
|         |                 |                 | 13 | R[166] | 1  | 185.1272        | 93.0672         |

## Annotated spectra from Saleem et. al. 2009

R.RM<sub>147</sub>S<sub>167</sub>SS<sub>167</sub>S<sub>167</sub>GGDS<sub>167</sub>ISR.Q/3

0.7389

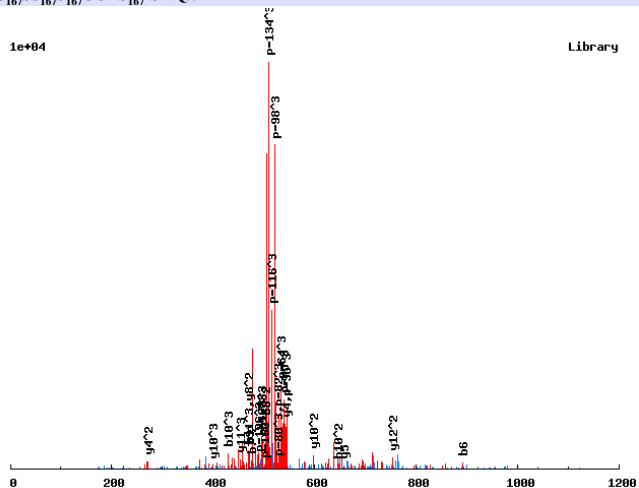

| Library | b <sup>1+</sup> | b <sup>2+</sup> | b <sup>3+</sup> | #  | AA     | #  | y <sup>1+</sup> | y <sup>2+</sup> | y <sup>3+</sup> |
|---------|-----------------|-----------------|-----------------|----|--------|----|-----------------|-----------------|-----------------|
|         | 157.1084        | 79.0578         | 53.0410         | 1  | R      | 13 |                 |                 |                 |
|         | 304.1438        | 152.5755        | 102.0528        | 2  | M[147] | 12 | 1506.3658       | 753.6865        | 502.7934        |
|         | <b>471.1422</b> | 236.0747        | 157.7189        | 3  | S[167] | 11 | 1359.3304       | 680.1688        | 453.7816        |
|         | 558.1742        | 279.5907        | 186.7296        | 4  | S      | 10 | 1192.3320       | 596.6696        | 398.1155        |
|         | 725.1725        | 363.0899        | 242.3957        | 5  | S[167] | 9  | 1105.3000       | 553.1536        | 369.1048        |
|         | <b>892.1709</b> | 446.5891        | 298.0618        | 6  | S[167] | 8  | 938.3016        | 469.6545        | 313.4387        |
|         | 949.1924        | <b>475.0998</b> | 317.0690        | 7  | G      | 7  | 771.3033        | 386.1553        | 257.7726        |
|         | 1006.2138       | <b>503.6106</b> | 336.0761        | 8  | G      | 6  | 714.2818        | 357.6445        | 238.7655        |
|         | 1121.2408       | 561.1240        | 374.4184        | 9  | D      | 5  | <b>657.2603</b> | 329.1338        | 219.7583        |
|         | 1288.2391       | <b>644.6232</b> | <b>430.0846</b> | 10 | S[167] | 4  | <b>542.2334</b> | <b>271.6203</b> | 181.4160        |
|         | 1401.3232       | 701.1652        | <b>467.7792</b> | 11 | I      | 3  | 375.2350        | 188.1212        | 125.7499        |
|         | 1488.3552       | 744.6812        | <b>496.7899</b> | 12 | S      | 2  | 262.1510        | 131.5791        | 88.0552         |
|         |                 |                 |                 | 13 | R      | 1  | 175.1190        | 88.0631         | 59.0445         |

# Annotated spectra from Saleem et. al. 2009

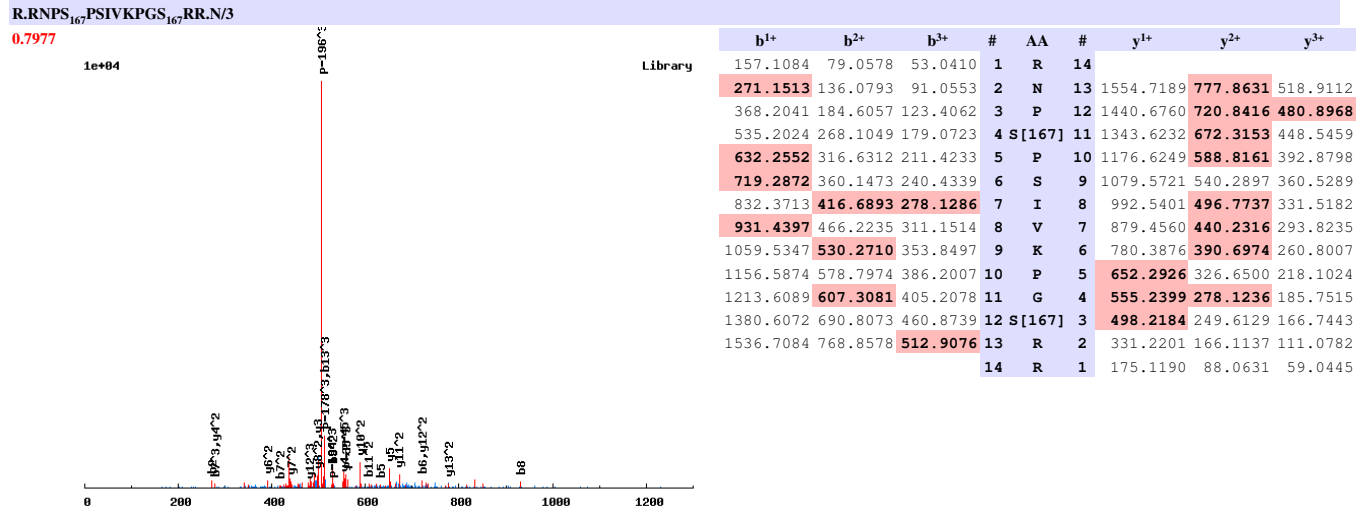

# Annotated spectra from Saleem et. al. 2009

R.R<sub>166</sub>NS<sub>167</sub>AYS<sub>167</sub>YYSR<sub>166</sub>S/2

0.5823

1e+04

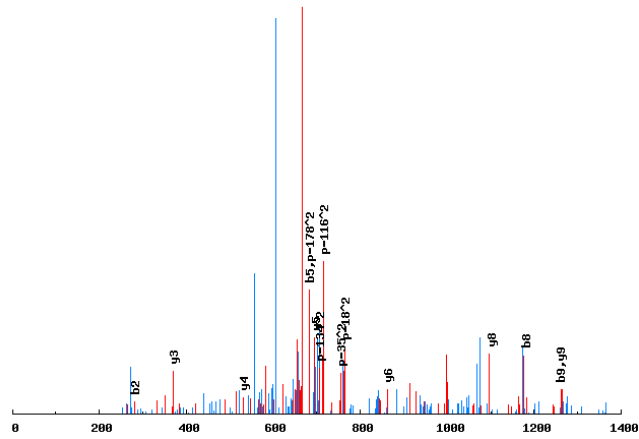

| Library | b <sup>1+</sup> | b <sup>2+</sup> | #  | AA     | #  | y <sup>1+</sup> | y <sup>2+</sup> |
|---------|-----------------|-----------------|----|--------|----|-----------------|-----------------|
|         | 167.1167        | 84.0620         | 1  | R[166] | 11 |                 |                 |
|         | 281.1596        | 141.0834        | 2  | N      | 10 | 1377.4788       | 689.2430        |
|         | 448.1579        | 224.5826        | 3  | S[167] | 9  | 1263.4358       | 632.2216        |
|         | 519.1951        | 260.1012        | 4  | A      | 8  | 1096.4375       | 548.7224        |
|         | 682.2584        | 341.6328        | 5  | Y      | 7  | 1025.4004       | 513.2038        |
|         | 849.2568        | 425.1320        | 6  | S[167] | 6  | 862.3370        | 431.6722        |
|         | 1012.3201       | 506.6637        | 7  | Y      | 5  | 695.3387        | 348.1730        |
|         | 1175.3834       | 588.1953        | 8  | Y      | 4  | 532.2753        | 266.6413        |
|         | 1262.4154       | 631.7114        | 9  | S      | 3  | 369.2120        | 185.1096        |
|         | 1359.4682       | 680.2377        | 10 | P      | 2  | 282.1800        | 141.5936        |
|         |                 |                 | 11 | R[166] | 1  | 185.1272        | 93.0672         |

# Annotated spectra from Saleem et. al. 2009

R.RNS<sub>167</sub>FPYC<sub>160</sub>K.D/2

0.9398

1e+04

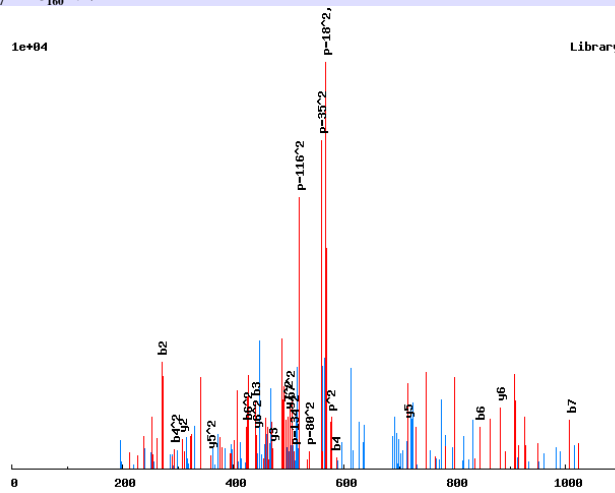

Library

|  | b <sup>1+</sup> | b <sup>2+</sup> | # | AA      | # | y <sup>1+</sup> | y <sup>2+</sup> |
|--|-----------------|-----------------|---|---------|---|-----------------|-----------------|
|  | 157.1084        | 79.0578         | 1 | R       | 8 |                 |                 |
|  | 271.1513        | 136.0793        | 2 | N       | 7 | 995.3692        | 498.1883        |
|  | 438.1497        | 219.5785        | 3 | S [167] | 6 | 881.3263        | 441.1668        |
|  | 585.2181        | 293.1127        | 4 | F       | 5 | 714.3280        | 357.6676        |
|  | 682.2709        | 341.6391        | 5 | P       | 4 | 567.2595        | 284.1334        |
|  | 845.3342        | 423.1707        | 6 | Y       | 3 | 470.2068        | 235.6070        |
|  | 1005.3648       | 503.1861        | 7 | C [160] | 2 | 307.1435        | 154.0754        |
|  |                 |                 | 8 | K       | 1 | 147.1128        | 74.0600         |



# Annotated spectra from Saleem et. al. 2009

R.R.<sub>166</sub>NS<sub>167</sub>ITGS<sub>167</sub>LR<sub>166</sub>S<sub>167</sub>IDMR<sub>166</sub>E/2

0.95

1e+04

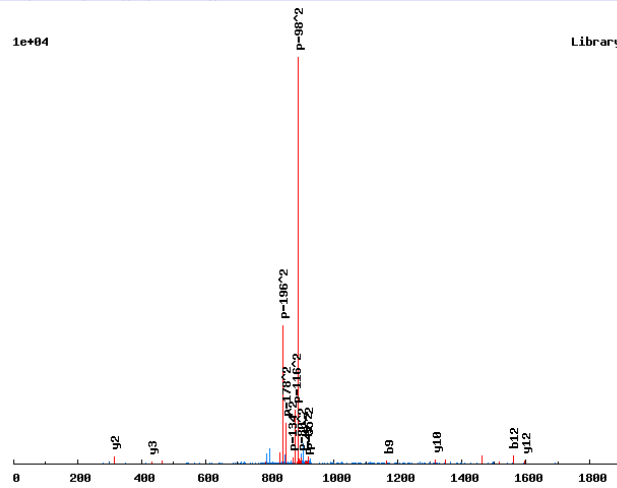

| Library | b <sup>1+</sup> | b <sup>2+</sup> | #  | AA     | #  | y <sup>1+</sup> | y <sup>2+</sup> |
|---------|-----------------|-----------------|----|--------|----|-----------------|-----------------|
|         | 167.1167        | 84.0620         | 1  | R[166] | 14 |                 |                 |
|         | 281.1596        | 141.0834        | 2  | N      | 13 | 1709.6634       | 855.3353        |
|         | 448.1579        | 224.5826        | 3  | S[167] | 12 | 1595.6204       | 798.3139        |
|         | 561.2420        | 281.1246        | 4  | I      | 11 | 1428.6221       | 714.8147        |
|         | 662.2897        | 331.6485        | 5  | T      | 10 | 1315.5380       | 658.2726        |
|         | 719.3112        | 360.1592        | 6  | G      | 9  | 1214.4903       | 607.7488        |
|         | 886.3095        | 443.6584        | 7  | S[167] | 8  | 1157.4689       | 579.2381        |
|         | 999.3936        | 500.2004        | 8  | L      | 7  | 990.4705        | 495.7389        |
|         | 1165.5030       | 583.2551        | 9  | R[166] | 6  | 877.3864        | 439.1969        |
|         | 1332.5013       | 666.7543        | 10 | S[167] | 5  | 711.2771        | 356.1422        |
|         | 1445.5854       | 723.2963        | 11 | I      | 4  | 544.2787        | 272.6430        |
|         | 1560.6123       | 780.8098        | 12 | D      | 3  | 431.1946        | 216.1010        |
|         | 1691.6528       | 846.3300        | 13 | M      | 2  | 316.1677        | 158.5875        |
|         |                 |                 | 14 | R[166] | 1  | 185.1272        | 93.0672         |

# Annotated spectra from Saleem et. al. 2009

K.R.<sub>166</sub>PAT<sub>181</sub>STPPR<sub>166</sub>K<sub>136</sub>PS<sub>167</sub>PVVK<sub>136</sub>R/3

0.9638

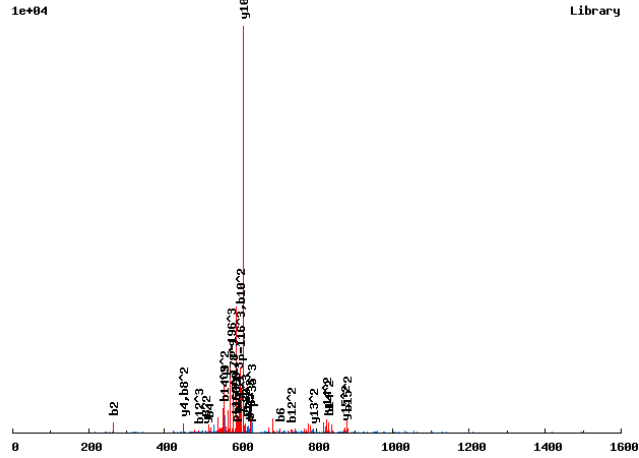

| Library | b <sup>1+</sup> | b <sup>2+</sup> | b <sup>3+</sup> | #  | AA     | #  | y <sup>1+</sup> | y <sup>2+</sup> | y <sup>3+</sup> |
|---------|-----------------|-----------------|-----------------|----|--------|----|-----------------|-----------------|-----------------|
|         | 167.1167        | 84.0620         | 56.3771         | 1  | R[166] | 16 |                 |                 |                 |
|         | 264.1694        | 132.5883        | 88.7280         | 2  | P      | 15 | 1747.8753       | 874.4413        | 583.2966        |
|         | 335.2065        | 168.1069        | 112.4070        | 3  | A      | 14 | 1650.8226       | 825.9149        | 550.9457        |
|         | 516.2205        | 258.6139        | 172.7450        | 4  | T[181] | 13 | 1579.7855       | 790.3964        | 527.2667        |
|         | 603.2526        | 302.1299        | 201.7557        | 5  | S      | 12 | 1398.7715       | 699.8894        | 466.9287        |
|         | 704.3003        | 352.6538        | 235.4383        | 6  | T      | 11 | 1311.7394       | 656.3734        | 437.9180        |
|         | 801.3530        | 401.1801        | 267.7892        | 7  | P      | 10 | 1210.6918       | 605.8495        | 404.2354        |
|         | 898.4058        | 449.7065        | 300.1401        | 8  | P      | 9  | 1113.6390       | 557.3231        | 371.8845        |
|         | 1064.5151       | 532.7612        | 355.5099        | 9  | R[166] | 8  | 1016.5862       | 508.7968        | 339.5336        |
|         | 1200.6243       | 600.8158        | 400.8796        | 10 | K[136] | 7  | 850.4769        | 425.7421        | 284.1638        |
|         | 1297.6771       | 649.3422        | 433.2305        | 11 | P      | 6  | 714.3677        | 357.6875        | 238.7941        |
|         | 1464.6754       | 732.8414        | 488.8967        | 12 | S[167] | 5  | 617.3149        | 309.1611        | 206.4432        |
|         | 1561.7282       | 781.3677        | 521.2476        | 13 | P      | 4  | 450.3166        | 225.6619        | 150.7770        |
|         | 1660.7966       | 830.9019        | 554.2704        | 14 | V      | 3  | 353.2638        | 177.1355        | 118.4261        |
|         | 1759.8650       | 880.4361        | 587.2932        | 15 | V      | 2  | 254.1954        | 127.6013        | 85.4033         |
|         |                 |                 |                 | 16 | K[136] | 1  | 155.1270        | 78.0671         | 52.3805         |

# Annotated spectra from Saleem et. al. 2009

K.R<sub>166</sub>PQS<sub>167</sub>VGQFR<sub>166</sub>S/2

0.7021

1e+04

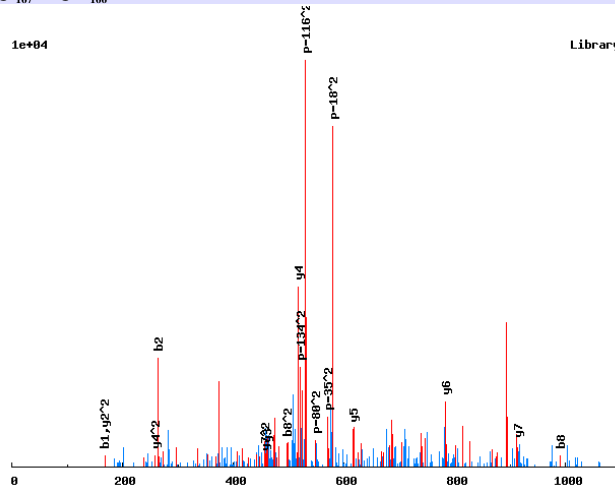

| Library | b <sup>1+</sup> | b <sup>2+</sup> | # | AA | #     | y <sup>1+</sup> | y <sup>2+</sup> |          |
|---------|-----------------|-----------------|---|----|-------|-----------------|-----------------|----------|
|         | 167.1167        | 84.0620         | 1 | R  | [166] | 9               |                 |          |
|         | 264.1694        | 132.5883        | 2 | P  | 8     | 1008.4538       | 504.7305        |          |
|         | 392.2280        | 196.6176        | 3 | Q  | 7     | 911.4010        | 456.2042        |          |
|         | 559.2264        | 280.1168        | 4 | S  | [167] | 6               | 783.3424        | 392.1749 |
|         | 658.2948        | 329.6510        | 5 | V  | 5     | 616.3441        | 308.6757        |          |
|         | 715.3162        | 358.1618        | 6 | G  | 4     | 517.2757        | 259.1415        |          |
|         | 843.3748        | 422.1910        | 7 | Q  | 3     | 460.2542        | 230.6307        |          |
|         | 990.4432        | 495.7253        | 8 | F  | 2     | 332.1956        | 166.6015        |          |
|         |                 |                 | 9 | R  | [166] | 1               | 185.1272        | 93.0672  |



# Annotated spectra from Saleem et. al. 2009

R.RPS<sub>167</sub>NTFNLDADR.I/2

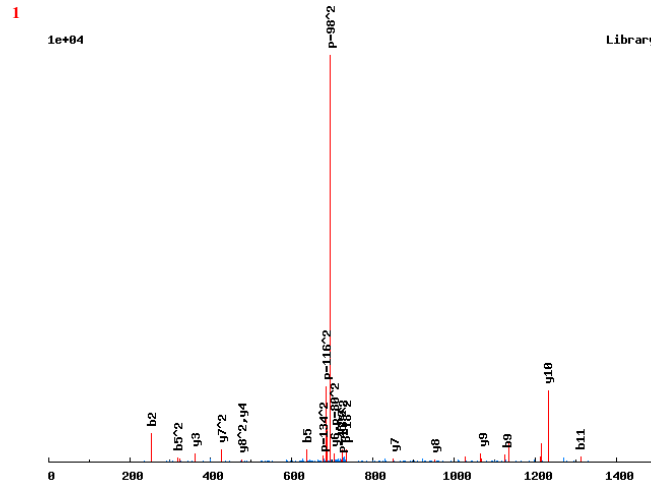

| Library | b <sup>1+</sup>  | b <sup>2+</sup> | #  | AA     | #  | y <sup>1+</sup>  | y <sup>2+</sup> |
|---------|------------------|-----------------|----|--------|----|------------------|-----------------|
|         | 157.1084         | 79.0578         | 1  | R      | 12 |                  |                 |
|         | <b>254.1612</b>  | 127.5842        | 2  | P      | 11 | 1329.5471        | 665.2772        |
|         | 421.1595         | 211.0834        | 3  | S[167] | 10 | <b>1232.4943</b> | 616.7508        |
|         | 535.2024         | 268.1049        | 4  | N      | 9  | <b>1065.4959</b> | 533.2516        |
|         | <b>636.2501</b>  | <b>318.6287</b> | 5  | T      | 8  | <b>951.4530</b>  | <b>476.2302</b> |
|         | 783.3185         | 392.1629        | 6  | F      | 7  | <b>850.4053</b>  | <b>425.7063</b> |
|         | 897.3615         | 449.1844        | 7  | N      | 6  | <b>703.3369</b>  | 352.1721        |
|         | 1010.4455        | 505.7264        | 8  | L      | 5  | 589.2940         | 295.1506        |
|         | <b>1125.4725</b> | 563.2399        | 9  | D      | 4  | <b>476.2099</b>  | 238.6086        |
|         | 1196.5096        | 598.7584        | 10 | A      | 3  | <b>361.1830</b>  | 181.0951        |
|         | <b>1311.5365</b> | 656.2719        | 11 | D      | 2  | 290.1459         | 145.5766        |
|         |                  |                 | 12 | R      | 1  | 175.1190         | 88.0631         |

# Annotated spectra from Saleem et. al. 2009

R.RPS<sub>167</sub>QPLNTLSPK.L/2

0.9749

1e+04

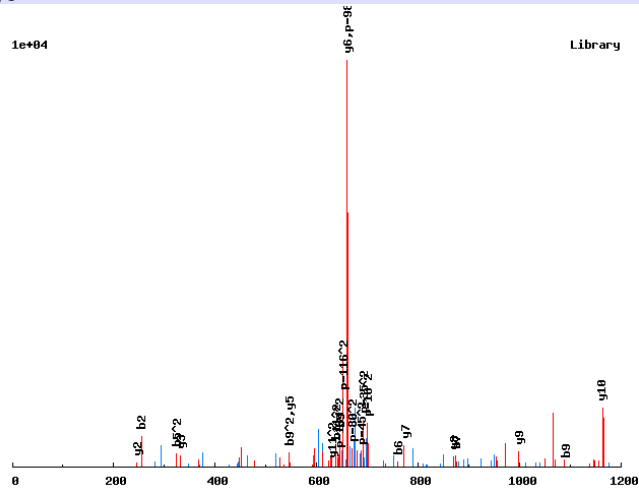

| Library | b <sup>1+</sup>  | b <sup>2+</sup> | #  | AA     | #  | y <sup>1+</sup>  | y <sup>2+</sup> |
|---------|------------------|-----------------|----|--------|----|------------------|-----------------|
|         | 157.1084         | 79.0578         | 1  | R      | 12 |                  |                 |
|         | <b>254.1612</b>  | 127.5842        | 2  | P      | 11 | 1261.6188        | <b>631.3130</b> |
|         | 421.1595         | 211.0834        | 3  | S[167] | 10 | <b>1164.5660</b> | 582.7867        |
|         | 549.2181         | 275.1127        | 4  | Q      | 9  | <b>997.5677</b>  | 499.2875        |
|         | <b>646.2709</b>  | <b>323.6391</b> | 5  | P      | 8  | <b>869.5091</b>  | 435.2582        |
|         | <b>759.3549</b>  | 380.1811        | 6  | L      | 7  | <b>772.4563</b>  | 386.7318        |
|         | <b>873.3978</b>  | 437.2026        | 7  | N      | 6  | <b>659.3723</b>  | 330.1898        |
|         | 974.4455         | 487.7264        | 8  | T      | 5  | <b>545.3293</b>  | 273.1683        |
|         | <b>1087.5296</b> | <b>544.2684</b> | 9  | L      | 4  | 444.2817         | 222.6445        |
|         | 1174.5616        | 587.7844        | 10 | S      | 3  | <b>331.1976</b>  | 166.1024        |
|         | 1271.6144        | <b>636.3108</b> | 11 | P      | 2  | <b>244.1656</b>  | 122.5864        |
|         |                  |                 | 12 | K      | 1  | 147.1128         | 74.0600         |

# Annotated spectra from Saleem et. al. 2009

R.R<sub>166</sub>PS<sub>167</sub>QPLNLS<sub>167</sub>PK<sub>136</sub>L/2

0.9921

1e+04

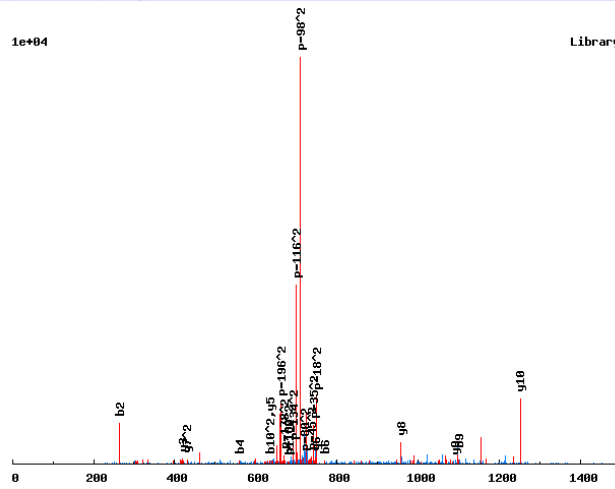

| Library | b <sup>1+</sup> | b <sup>2+</sup> | #  | AA     | #  | y <sup>1+</sup> | y <sup>2+</sup> |
|---------|-----------------|-----------------|----|--------|----|-----------------|-----------------|
|         | 167.1167        | 84.0620         | 1  | R[166] | 12 |                 |                 |
|         | 264.1694        | 132.5883        | 2  | P      | 11 | 1349.5993       | 675.3033        |
|         | 431.1678        | 216.0875        | 3  | S[167] | 10 | 1252.5466       | 626.7769        |
|         | 559.2264        | 280.1168        | 4  | Q      | 9  | 1085.5482       | 543.2777        |
|         | 656.2791        | 328.6432        | 5  | P      | 8  | 957.4896        | 479.2484        |
|         | 769.3632        | 385.1852        | 6  | L      | 7  | 860.4369        | 430.7221        |
|         | 883.4061        | 442.2067        | 7  | N      | 6  | 747.3528        | 374.1800        |
|         | 984.4538        | 492.7305        | 8  | T      | 5  | 633.3099        | 317.1586        |
|         | 1097.5379       | 549.2726        | 9  | L      | 4  | 532.2622        | 266.6347        |
|         | 1264.5362       | 632.7717        | 10 | S[167] | 3  | 419.1781        | 210.0927        |
|         | 1361.5890       | 681.2981        | 11 | P      | 2  | 252.1798        | 126.5935        |
|         |                 |                 | 12 | K[136] | 1  | 155.1270        | 78.0671         |

# Annotated spectra from Saleem et. al. 2009

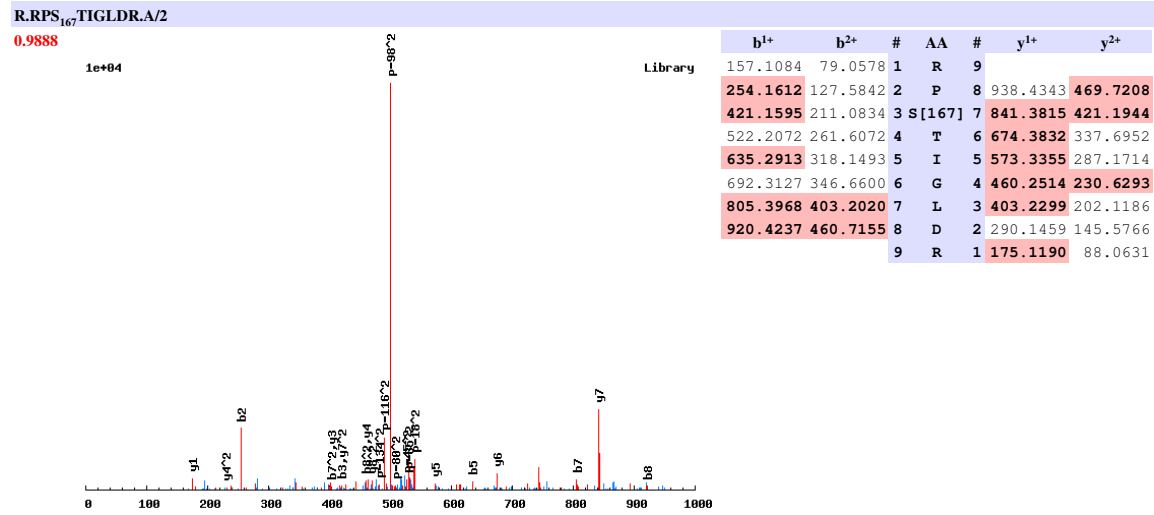



# Annotated spectra from Saleem et. al. 2009

R.RPS<sub>167</sub>T<sub>181</sub>I.GLDR.A/2

1

1e+04

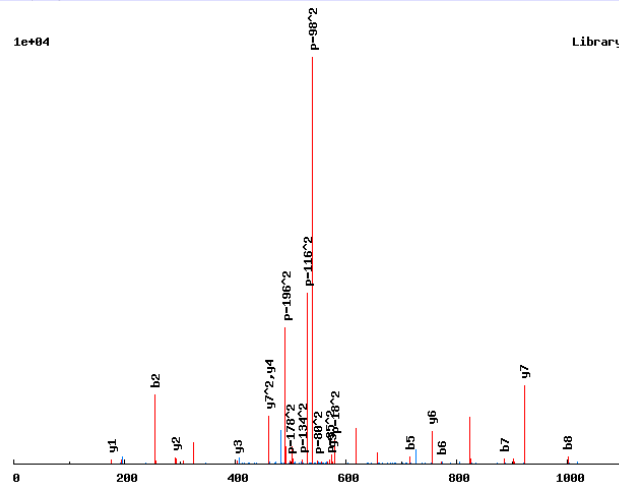

| Library | b <sup>1+</sup> | b <sup>2+</sup> | # | AA     | # | y <sup>1+</sup> | y <sup>2+</sup> |
|---------|-----------------|-----------------|---|--------|---|-----------------|-----------------|
|         | 157.1084        | 79.0578         | 1 | R      | 9 |                 |                 |
|         | 254.1612        | 127.5842        | 2 | P      | 8 | 1018.4006       | 509.7039        |
|         | 421.1595        | 211.0834        | 3 | S[167] | 7 | 921.3478        | 461.1776        |
|         | 602.1735        | 301.5904        | 4 | T[181] | 6 | 754.3495        | 377.6784        |
|         | 715.2576        | 358.1324        | 5 | I      | 5 | 573.3355        | 287.1714        |
|         | 772.2790        | 386.6432        | 6 | G      | 4 | 460.2514        | 230.6293        |
|         | 885.3631        | 443.1852        | 7 | L      | 3 | 403.2299        | 202.1186        |
|         | 1000.3900       | 500.6987        | 8 | D      | 2 | 290.1459        | 145.5766        |
|         |                 |                 | 9 | R      | 1 | 175.1190        | 88.0631         |

# Annotated spectra from Saleem et. al. 2009

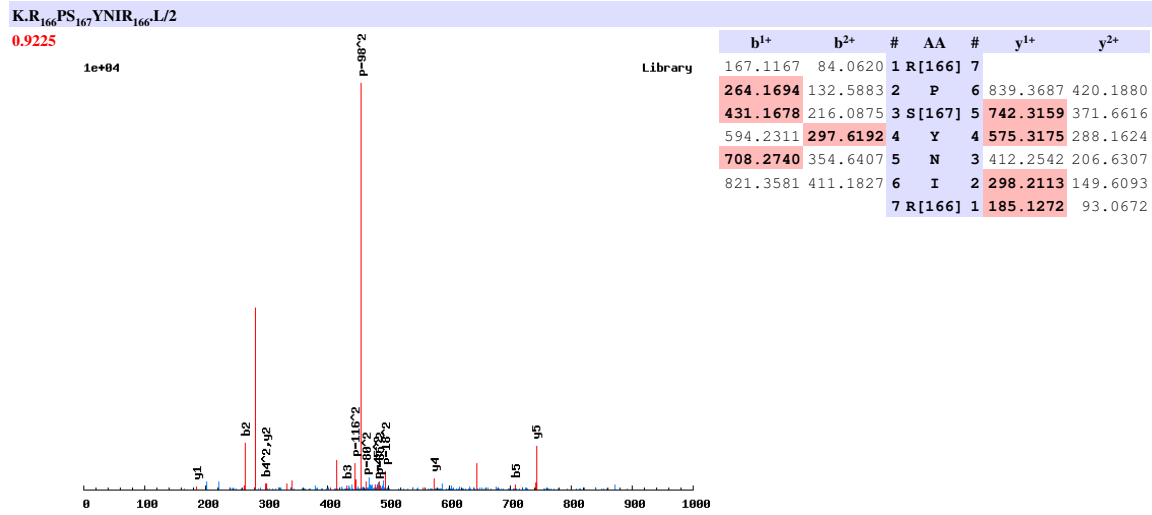

### Annotated spectra from Saleem et. al. 2009

K.RPVAS<sub>167</sub>SAGS<sub>167</sub>ENNDHLDDM<sub>147</sub>NHLR.S/3

0.8671

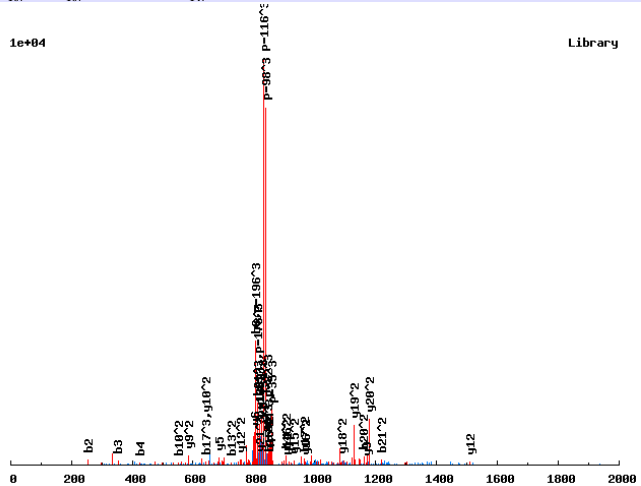

| Library | b <sup>1+</sup> | b <sup>2+</sup>  | b <sup>3+</sup> | #  | AA     | #  | y <sup>1+</sup>  | y <sup>2+</sup>  | y <sup>3+</sup> |
|---------|-----------------|------------------|-----------------|----|--------|----|------------------|------------------|-----------------|
|         | 157.1084        | 79.0578          | 53.0410         | 1  | R      | 22 |                  |                  |                 |
|         | <b>254.1612</b> | 127.5842         | 85.3919         | 2  | P      | 21 | 2454.9381        | 1227.9727        | <b>818.9842</b> |
|         | <b>353.2296</b> | 177.1184         | 118.4147        | 3  | V      | 20 | 2357.8853        | <b>1179.4463</b> | 786.6333        |
|         | <b>424.2667</b> | 212.6370         | 142.0937        | 4  | A      | 19 | 2258.8169        | <b>1129.9121</b> | 753.6105        |
|         | 591.2650        | 296.1362         | 197.7599        | 5  | S[167] | 18 | 2187.7798        | <b>1094.3935</b> | 729.9315        |
|         | 678.2971        | 339.6522         | 226.7705        | 6  | S      | 17 | 2020.7815        | 1010.8944        | 674.2653        |
|         | 749.3342        | 375.1707         | 250.4496        | 7  | A      | 16 | 1933.7494        | <b>967.3784</b>  | 645.2547        |
|         | <b>806.3556</b> | 403.6815         | 269.4567        | 8  | G      | 15 | 1862.7123        | <b>931.8598</b>  | 621.5756        |
|         | 973.3540        | 487.1806         | 325.1229        | 9  | S[167] | 14 | 1805.6909        | <b>903.3491</b>  | 602.5685        |
|         | 1102.3966       | <b>551.7019</b>  | 368.1370        | 10 | E      | 13 | 1638.6925        | <b>819.8499</b>  | 546.9023        |
|         | 1216.4395       | 608.7234         | 406.1514        | 11 | N      | 12 | <b>1509.6499</b> | <b>755.3286</b>  | 503.8882        |
|         | 1330.4824       | 665.7449         | 444.1657        | 12 | N      | 11 | 1395.6070        | 698.3071         | 465.8738        |
|         | 1445.5094       | <b>723.2583</b>  | 482.5080        | 13 | D      | 10 | 1281.5640        | <b>641.2857</b>  | 427.8595        |
|         | 1582.5683       | 791.7878         | 528.1943        | 14 | H      | 9  | <b>1166.5371</b> | <b>583.7722</b>  | 389.5172        |
|         | 1695.6524       | <b>848.3298</b>  | 565.8890        | 15 | L      | 8  | 1029.4782        | 515.2427         | 343.8309        |
|         | 1810.6793       | <b>905.8433</b>  | 604.2313        | 16 | D      | 7  | <b>916.3941</b>  | 458.7007         | 306.1362        |
|         | 1925.7062       | <b>963.3568</b>  | <b>642.5736</b> | 17 | D      | 6  | <b>801.3672</b>  | 401.1872         | 267.7939        |
|         | 2072.7416       | 1036.8745        | 691.5854        | 18 | M[147] | 5  | <b>686.3403</b>  | 343.6738         | 229.4516        |
|         | 2186.7846       | 1093.8959        | 729.5997        | 19 | N      | 4  | 539.3049         | 270.1561         | 180.4398        |
|         | 2323.8435       | <b>1162.4254</b> | 775.2860        | 20 | H      | 3  | 425.2619         | 213.1346         | 142.4255        |
|         | 2436.9275       | <b>1218.9674</b> | <b>812.9807</b> | 21 | L      | 2  | 288.2030         | 144.6051         | 96.7392         |
|         |                 |                  |                 | 22 | R      | 1  | 175.1190         | 88.0631          | 59.0445         |

# Annotated spectra from Saleem et. al. 2009

K.RPVASSAGS<sub>167</sub>ENNDHLDDMNHLR.S/4

0.9983

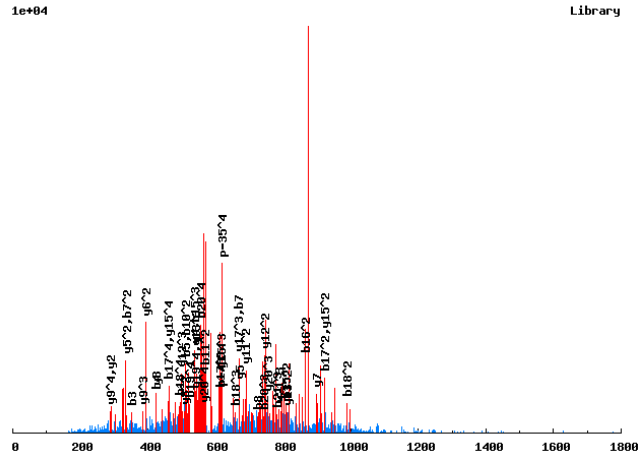

| Library | b <sup>1+</sup> | b <sup>2+</sup> | b <sup>3+</sup> | b <sup>4+</sup> | #  | AA     | #  | y <sup>1+</sup> | y <sup>2+</sup> | y <sup>3+</sup> | y <sup>4+</sup> |
|---------|-----------------|-----------------|-----------------|-----------------|----|--------|----|-----------------|-----------------|-----------------|-----------------|
|         | 157.1084        | 79.0578         | 53.0410         | 40.0326         | 1  | R      | 22 |                 |                 |                 |                 |
|         | 254.1612        | 127.5842        | 85.3919         | 64.2957         | 2  | P      | 21 | 2358.9769       | 1179.9921       | 786.9971        | 590.4997        |
|         | 353.2296        | 177.1184        | 118.4147        | 89.0628         | 3  | V      | 20 | 2261.9241       | 1131.4657       | 754.6462        | 566.2365        |
|         | 424.2667        | 212.6370        | 142.0937        | 106.8221        | 4  | A      | 19 | 2162.8557       | 1081.9315       | 721.6234        | 541.4694        |
|         | 511.2987        | 256.1530        | 171.1044        | 128.5801        | 5  | S      | 18 | 2091.8186       | 1046.4129       | 697.9444        | 523.7101        |
|         | 598.3307        | 299.6690        | 200.1151        | 150.3381        | 6  | S      | 17 | 2004.7865       | 1002.8969       | 668.9337        | 501.9521        |
|         | 669.3678        | 335.1876        | 223.7941        | 168.0974        | 7  | A      | 16 | 1917.7545       | 959.3809        | 639.9230        | 480.1941        |
|         | 726.3893        | 363.6983        | 242.8013        | 182.3528        | 8  | G      | 15 | 1846.7174       | 923.8623        | 616.2440        | 462.4348        |
|         | 893.3877        | 447.1975        | 298.4674        | 224.1024        | 9  | S[167] | 14 | 1789.6959       | 895.3516        | 597.2368        | 448.1794        |
|         | 1022.4303       | 511.7188        | 341.4816        | 256.3630        | 10 | E      | 13 | 1622.6976       | 811.8524        | 541.5707        | 406.4299        |
|         | 1136.4732       | 568.7402        | 379.4959        | 284.8738        | 11 | N      | 12 | 1493.6550       | 747.3311        | 498.5565        | 374.1692        |
|         | 1250.5161       | 625.7617        | 417.5102        | 313.3845        | 12 | N      | 11 | 1379.6121       | 690.3097        | 460.5422        | 345.6585        |
|         | 1365.5431       | 683.2752        | 455.8525        | 342.1412        | 13 | D      | 10 | 1265.5691       | 633.2882        | 422.5279        | 317.1477        |
|         | 1502.6020       | 751.8046        | 501.5388        | 376.4060        | 14 | H      | 9  | 1150.5422       | 575.7747        | 384.1856        | 288.3910        |
|         | 1615.6860       | 808.3467        | 539.2335        | 404.6770        | 15 | L      | 8  | 1013.4833       | 507.2453        | 338.4993        | 254.1263        |
|         | 1730.7130       | 865.8601        | 577.5758        | 433.4337        | 16 | D      | 7  | 900.3992        | 450.7033        | 300.8046        | 225.8553        |
|         | 1845.7399       | 923.3736        | 615.9182        | 462.1904        | 17 | D      | 6  | 785.3723        | 393.1898        | 262.4623        | 197.0985        |
|         | 1976.7804       | 988.8938        | 659.5983        | 494.9506        | 18 | M      | 5  | 670.3453        | 335.6763        | 224.1200        | 168.3418        |
|         | 2090.8233       | 1045.9153       | 697.6126        | 523.4613        | 19 | N      | 4  | 539.3049        | 270.1561        | 180.4398        | 135.5817        |
|         | 2227.8822       | 1114.4448       | 743.2989        | 557.7260        | 20 | H      | 3  | 425.2619        | 213.1346        | 142.4255        | 107.0709        |
|         | 2340.9663       | 1170.9868       | 780.9936        | 585.9970        | 21 | L      | 2  | 288.2030        | 144.6051        | 96.7392         | 72.8062         |
|         |                 |                 |                 |                 | 22 | R      | 1  | 175.1190        | 88.0631         | 59.0445         | 44.5352         |

Annotated spectra from Saleem et. al. 2009

R.R<sub>166</sub>QS<sub>167</sub>EAFAGQNEADLK<sub>136</sub>DDGSVVS<sub>136</sub>GSNK<sub>136</sub>R<sub>166</sub>K/4

0.8531

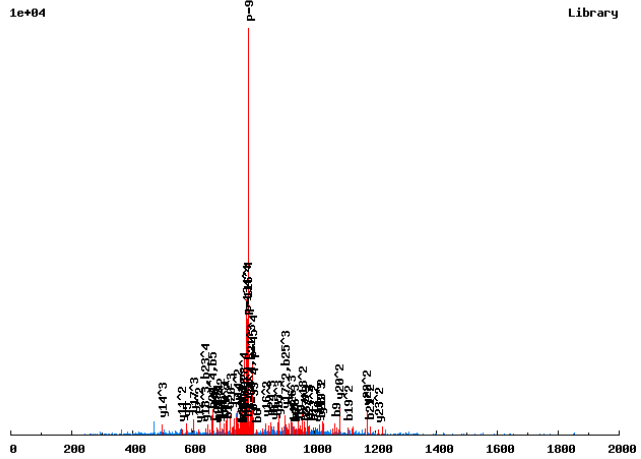

| Library | b <sup>1+</sup> | b <sup>2+</sup> | b <sup>3+</sup> | b <sup>4+</sup> | #  | AA     | #  | y <sup>1+</sup> | y <sup>2+</sup> | y <sup>3+</sup> | y <sup>4+</sup> |
|---------|-----------------|-----------------|-----------------|-----------------|----|--------|----|-----------------|-----------------|-----------------|-----------------|
|         | 167.1167        | 84.0620         | 56.3771         | 42.5346         | 1  | R[166] | 29 |                 |                 |                 |                 |
|         | 295.1752        | 148.0913        | 99.0633         | 74.5493         | 2  | Q      | 28 | 3059.3435       | 1530.1754       | 1020.4527       | 765.5913        |
|         | 462.1736        | 231.5904        | 154.7294        | 116.2989        | 3  | S[167] | 27 | 2931.2850       | 1466.1461       | 977.7665        | 733.5767        |
|         | 591.2162        | 296.1117        | 197.7436        | 148.5595        | 4  | E      | 26 | 2764.2866       | 1382.6469       | 922.1004        | 691.8271        |
|         | 662.2533        | 331.6303        | 221.4226        | 166.3188        | 5  | A      | 25 | 2635.2440       | 1318.1256       | 879.0862        | 659.5665        |
|         | 809.3217        | 405.1645        | 270.4454        | 203.0859        | 6  | F      | 24 | 2564.2069       | 1282.6071       | 855.4072        | 641.8072        |
|         | 880.3588        | 440.6831        | 294.1245        | 220.8452        | 7  | A      | 23 | 2417.1385       | 1209.0729       | 806.3843        | 605.0401        |
|         | 937.3803        | 469.1938        | 313.1316        | 235.1005        | 8  | G      | 22 | 2346.1014       | 1173.5543       | 782.7053        | 587.2808        |
|         | 1065.4389       | 533.2231        | 355.8178        | 267.1152        | 9  | Q      | 21 | 2289.0799       | 1145.0436       | 763.6982        | 573.0254        |
|         | 1179.4818       | 590.2445        | 393.8321        | 295.6259        | 10 | N      | 20 | 2161.0213       | 1081.0143       | 721.0120        | 541.0108        |
|         | 1308.5244       | 654.7658        | 436.8463        | 327.8866        | 11 | E      | 19 | 2046.9784       | 1023.9928       | 682.9977        | 512.5001        |
|         | 1423.5513       | 712.2793        | 475.1886        | 356.6433        | 12 | D      | 18 | 1917.9358       | 959.4715        | 639.9835        | 480.2394        |
|         | 1552.5939       | 776.8006        | 518.2028        | 388.9039        | 13 | E      | 17 | 1802.9089       | 901.9581        | 601.6411        | 451.4827        |
|         | 1623.6310       | 812.3192        | 541.8819        | 406.6632        | 14 | A      | 16 | 1673.8663       | 837.4368        | 558.6269        | 419.2220        |
|         | 1738.6580       | 869.8326        | 580.2242        | 435.4200        | 15 | D      | 15 | 1602.8292       | 801.9182        | 534.9479        | 401.4628        |
|         | 1851.7420       | 926.3746        | 617.9189        | 463.6910        | 16 | L      | 14 | 1487.8022       | 744.4048        | 496.6056        | 372.7060        |
|         | 1987.8512       | 994.4292        | 663.2886        | 497.7183        | 17 | K[136] | 13 | 1374.7182       | 687.8627        | 458.9109        | 344.4350        |
|         | 2102.8781       | 1051.9427       | 701.6309        | 526.4750        | 18 | D      | 12 | 1238.6090       | 619.8081        | 413.5412        | 310.4077        |
|         | 2217.9051       | 1109.4562       | 739.9732        | 555.2317        | 19 | D      | 11 | 1123.5821       | 562.2947        | 375.1989        | 281.6510        |
|         | 2274.9265       | 1137.9669       | 758.9804        | 569.4871        | 20 | G      | 10 | 1008.5551       | 504.7812        | 336.8566        | 252.8942        |
|         | 2361.9585       | 1181.4829       | 787.9910        | 591.2451        | 21 | S      | 9  | 951.5337        | 476.2705        | 317.8494        | 238.6389        |
|         | 2461.0270       | 1231.0171       | 821.0138        | 616.0122        | 22 | V      | 8  | 864.5016        | 432.7545        | 288.8387        | 216.8809        |
|         | 2560.0954       | 1280.5513       | 854.0366        | 640.7793        | 23 | V      | 7  | 765.4332        | 383.2203        | 255.8159        | 192.1138        |
|         | 2647.1274       | 1324.0673       | 883.0473        | 662.5373        | 24 | S      | 6  | 666.3648        | 333.6861        | 222.7931        | 167.3467        |
|         | 2704.1489       | 1352.5781       | 902.0545        | 676.7927        | 25 | G      | 5  | 579.3328        | 290.1700        | 193.7825        | 145.5887        |
|         | 2791.1809       | 1396.0941       | 931.0651        | 698.5507        | 26 | S      | 4  | 522.3113        | 261.6593        | 174.7753        | 131.3333        |
|         | 2905.2238       | 1453.1155       | 969.0795        | 727.0614        | 27 | N      | 3  | 435.2793        | 218.1433        | 145.7646        | 109.5753        |
|         | 3041.3330       | 1521.1701       | 1014.4492       | 761.0887        | 28 | K[136] | 2  | 321.2364        | 161.1218        | 107.7503        | 81.0646         |
|         |                 |                 |                 |                 | 29 | R[166] | 1  | 185.1272        | 93.0672         | 62.3806         | 47.0373         |

# Annotated spectra from Saleem et. al. 2009

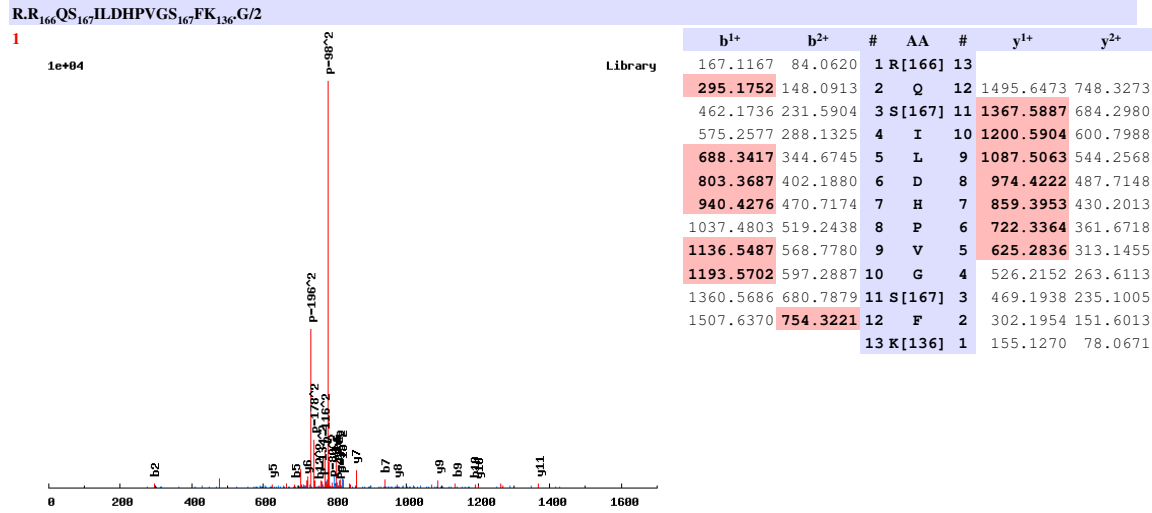

# Annotated spectra from Saleem et. al. 2009

R.R.<sub>166</sub>QS<sub>167</sub>MDIPSK<sub>136</sub>N/2

0.7745

1e+04

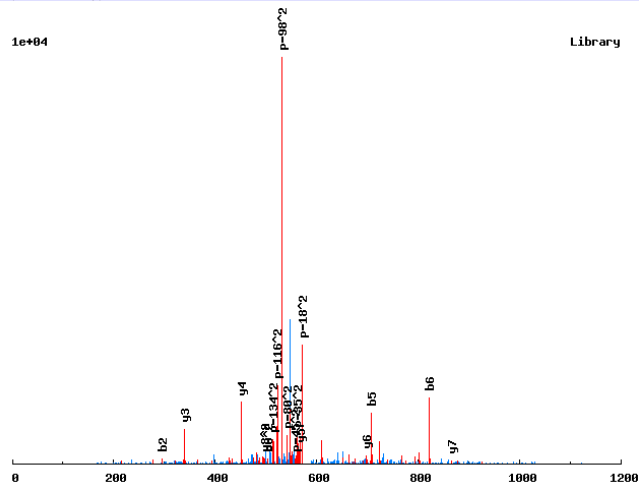

| Library | b <sup>1+</sup> | b <sup>2+</sup> | # | AA     | # | y <sup>1+</sup> | y <sup>2+</sup> |
|---------|-----------------|-----------------|---|--------|---|-----------------|-----------------|
|         | 167.1167        | 84.0620         | 1 | R[166] | 9 |                 |                 |
|         | 295.1752        | 148.0913        | 2 | Q      | 8 | 993.4202        | 497.2138        |
|         | 462.1736        | 231.5904        | 3 | S[167] | 7 | 865.3616        | 433.1845        |
|         | 593.2141        | 297.1107        | 4 | M      | 6 | 698.3633        | 349.6853        |
|         | 708.2410        | 354.6242        | 5 | D      | 5 | 567.3228        | 284.1650        |
|         | 821.3251        | 411.1662        | 6 | I      | 4 | 452.2958        | 226.6516        |
|         | 918.3779        | 459.6926        | 7 | P      | 3 | 339.2118        | 170.1095        |
|         | 1005.4099       | 503.2086        | 8 | S      | 2 | 242.1590        | 121.5832        |
|         |                 |                 | 9 | K[136] | 1 | 155.1270        | 78.0671         |

# Annotated spectra from Saleem et. al. 2009

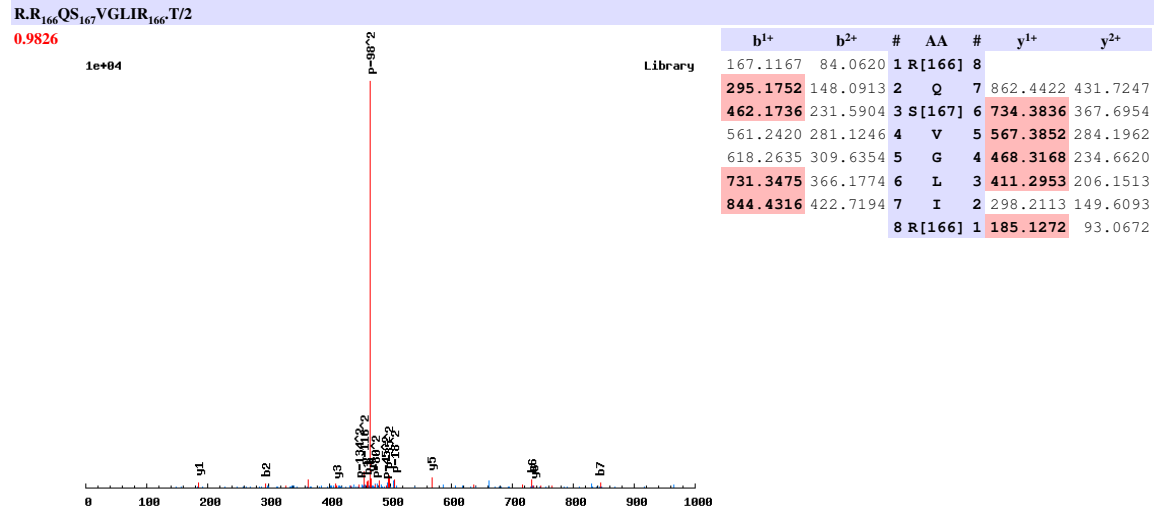



# Annotated spectra from Saleem et. al. 2009

R.R<sub>166</sub>R<sub>166</sub>S<sub>167</sub>T<sub>181</sub>NYMDALNSR<sub>166</sub>E/3

0.9996

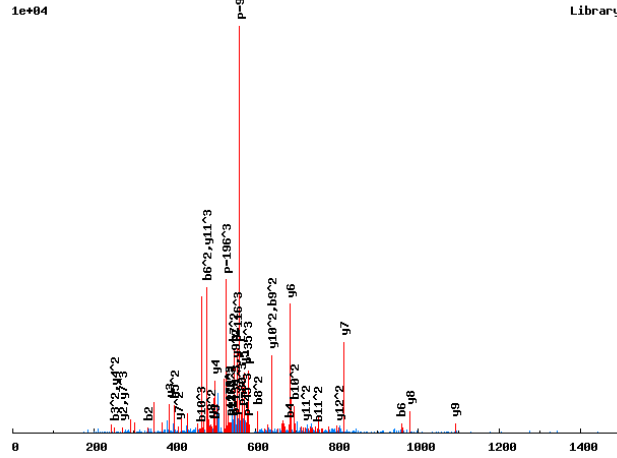

| Library | b <sup>1+</sup> | b <sup>2+</sup> | b <sup>3+</sup> | #  | AA     | #  | y <sup>1+</sup> | y <sup>2+</sup> | y <sup>3+</sup> |
|---------|-----------------|-----------------|-----------------|----|--------|----|-----------------|-----------------|-----------------|
|         | 167.1167        | 84.0620         | 56.3771         | 1  | R[166] | 13 |                 |                 |                 |
|         | 333.2260        | 167.1167        | 111.7469        | 2  | R[166] | 12 | 1607.6188       | 804.3130        | 536.5444        |
|         | 500.2244        | 250.6158        | 167.4130        | 3  | S[167] | 11 | 1441.5094       | 721.2583        | 481.1747        |
|         | 681.2384        | 341.1228        | 227.7510        | 4  | T[181] | 10 | 1274.5110       | 637.7592        | 425.5085        |
|         | 795.2813        | 398.1443        | 265.7653        | 5  | N      | 9  | 1093.4970       | 547.2522        | 365.1705        |
|         | 958.3447        | 479.6760        | 320.1197        | 6  | Y      | 8  | 979.4541        | 490.2307        | 327.1562        |
|         | 1089.3852       | 545.1962        | 363.7999        | 7  | M      | 7  | 816.3908        | 408.6990        | 272.8018        |
|         | 1204.4121       | 602.7097        | 402.1422        | 8  | D      | 6  | 685.3503        | 343.1788        | 229.1216        |
|         | 1275.4492       | 638.2282        | 425.8213        | 9  | A      | 5  | 570.3233        | 285.6653        | 190.7793        |
|         | 1388.5333       | 694.7703        | 463.5159        | 10 | L      | 4  | 499.2862        | 250.1468        | 167.1003        |
|         | 1502.5762       | 751.7917        | 501.5303        | 11 | N      | 3  | 386.2022        | 193.6047        | 129.4056        |
|         | 1589.6082       | 795.3078        | 530.5409        | 12 | S      | 2  | 272.1592        | 136.5833        | 91.3913         |
|         |                 |                 |                 | 13 | R[166] | 1  | 185.1272        | 93.0672         | 62.3806         |

# Annotated spectra from Saleem et. al. 2009

R.RS<sub>167</sub>ATPANS<sub>167</sub>SNGANFQK.E/2

0.9804

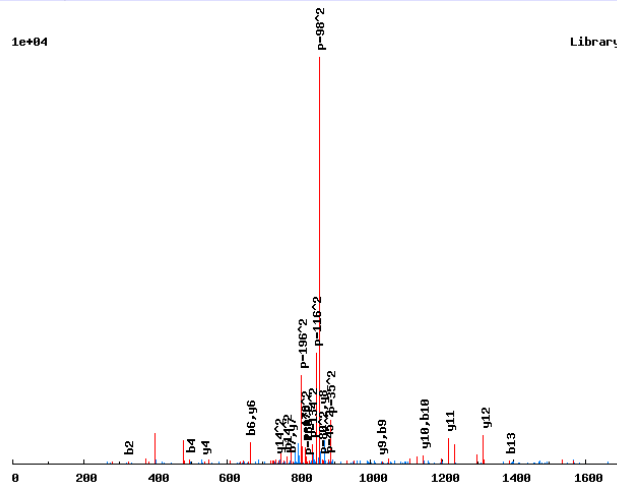

| Library | b <sup>1+</sup>  | b <sup>2+</sup> | #  | AA     | #  | y <sup>1+</sup>  | y <sup>2+</sup> |
|---------|------------------|-----------------|----|--------|----|------------------|-----------------|
|         | 157.1084         | 79.0578         | 1  | R      | 16 |                  |                 |
|         | <b>324.1068</b>  | 162.5570        | 2  | S[167] | 15 | 1653.6306        | 827.3189        |
|         | 395.1439         | 198.0756        | 3  | A      | 14 | 1486.6322        | <b>743.8197</b> |
|         | <b>496.1915</b>  | 248.5994        | 4  | T      | 13 | 1415.5951        | 708.3012        |
|         | 593.2443         | 297.1258        | 5  | P      | 12 | <b>1314.5474</b> | 657.7773        |
|         | <b>664.2814</b>  | 332.6443        | 6  | A      | 11 | <b>1217.4947</b> | 609.2510        |
|         | <b>778.3243</b>  | 389.6658        | 7  | N      | 10 | <b>1146.4575</b> | 573.7324        |
|         | 945.3227         | 473.1650        | 8  | S[167] | 9  | <b>1032.4146</b> | 516.7109        |
|         | <b>1032.3547</b> | 516.6810        | 9  | S      | 8  | <b>865.4163</b>  | 433.2118        |
|         | <b>1146.3977</b> | 573.7025        | 10 | N      | 7  | <b>778.3842</b>  | 389.6958        |
|         | 1203.4191        | 602.2132        | 11 | G      | 6  | <b>664.3413</b>  | 332.6743        |
|         | 1274.4562        | 637.7318        | 12 | A      | 5  | 607.3198         | 304.1636        |
|         | <b>1388.4992</b> | 694.7532        | 13 | N      | 4  | <b>536.2827</b>  | 268.6450        |
|         | 1535.5676        | <b>768.2874</b> | 14 | F      | 3  | 422.2398         | 211.6235        |
|         | 1663.6262        | 832.3167        | 15 | Q      | 2  | 275.1714         | 138.0893        |
|         |                  |                 | 16 | K      | 1  | 147.1128         | 74.0600         |

Annotated spectra from Saleem et. al. 2009

R.RSDS<sub>167</sub>GVHS<sub>167</sub>PITDNSSVASSTTSR.A/3

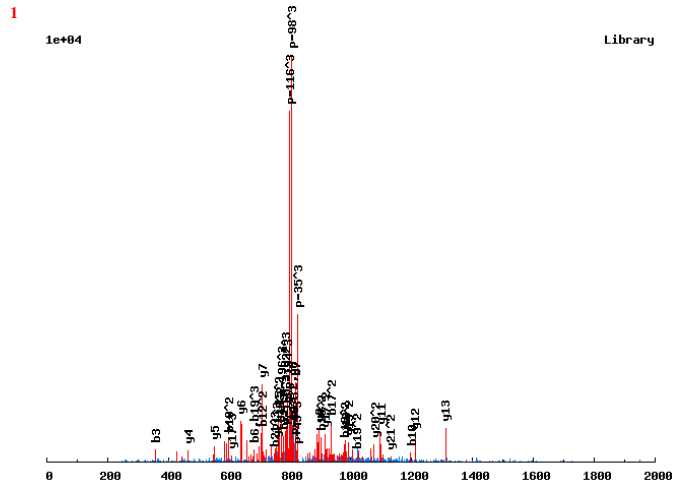

| Library | b <sup>1+</sup> | b <sup>2+</sup> | b <sup>3+</sup> | #  | AA | #        | y <sup>1+</sup> | y <sup>2+</sup> | y <sup>3+</sup> |
|---------|-----------------|-----------------|-----------------|----|----|----------|-----------------|-----------------|-----------------|
|         | 157.1084        | 79.0578         | 53.0410         | 1  | R  | 23       |                 |                 |                 |
|         | 244.1404        | 122.5739        | 82.0517         | 2  | S  | 22       | 2351.9388       | 1176.4731       | 784.6511        |
|         | 359.1674        | 180.0873        | 120.3940        | 3  | D  | 21       | 2264.9068       | 1132.9570       | 755.6405        |
|         | 526.1657        | 263.5865        | 176.0601        | 4  | S  | [167] 20 | 2149.8799       | 1075.4436       | 717.2981        |
|         | 583.1872        | 292.0972        | 195.0672        | 5  | G  | 19       | 1982.8815       | 991.9444        | 661.6320        |
|         | 682.2556        | 341.6314        | 228.0901        | 6  | V  | 18       | 1925.8600       | 963.4337        | 642.6249        |
|         | 819.3145        | 410.1609        | 273.7764        | 7  | H  | 17       | 1826.7916       | 913.8995        | 609.6021        |
|         | 986.3129        | 493.6601        | 329.4425        | 8  | S  | [167] 16 | 1689.7327       | 845.3700        | 563.9158        |
|         | 1083.3656       | 542.1865        | 361.7934        | 9  | P  | 15       | 1522.7343       | 761.8708        | 508.2496        |
|         | 1196.4497       | 598.7285        | 399.4881        | 10 | I  | 14       | 1425.6816       | 713.3444        | 475.8987        |
|         | 1297.4974       | 649.2523        | 433.1706        | 11 | T  | 13       | 1312.5975       | 656.8024        |                 |

# Annotated spectra from Saleem et. al. 2009

R.R.<sub>166</sub>SDSGVHS<sub>167</sub>PITDNS<sub>167</sub>S<sub>167</sub>VASSTSR<sub>166</sub>A/3

0.9416

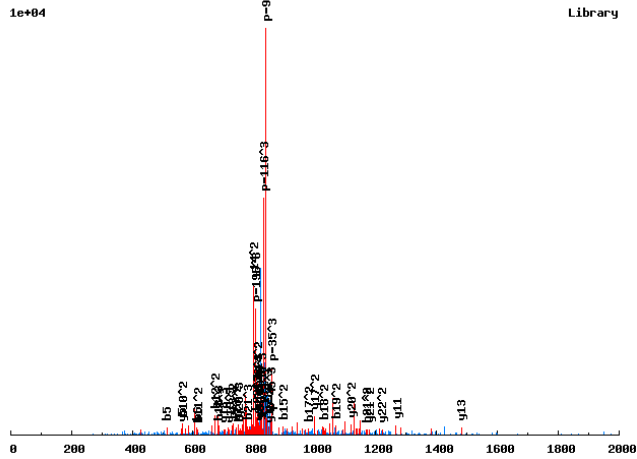

| Library | b <sup>1+</sup> | b <sup>2+</sup> | b <sup>3+</sup> | #  | AA     | #  | y <sup>1+</sup> | y <sup>2+</sup> | y <sup>3+</sup> |
|---------|-----------------|-----------------|-----------------|----|--------|----|-----------------|-----------------|-----------------|
|         | 167.1167        | 84.0620         | 56.3771         | 1  | R[166] | 23 |                 |                 |                 |
|         | 254.1487        | 127.5780        | 85.3877         | 2  | S      | 22 | 2441.9134       | 1221.4604       | 814.6427        |
|         | 369.1756        | 185.0915        | 123.7301        | 3  | D      | 21 | 2354.8814       | 1177.9443       | 785.6320        |
|         | 456.2077        | 228.6075        | 152.7407        | 4  | S      | 20 | 2239.8545       | 1120.4309       | 747.2897        |
|         | 513.2291        | 257.1182        | 171.7479        | 5  | G      | 19 | 2152.8224       | 1076.9149       | 718.2790        |
|         | 612.2975        | 306.6524        | 204.7707        | 6  | V      | 18 | 2095.8010       | 1048.4041       | 699.2718        |
|         | 749.3564        | 375.1819        | 250.4570        | 7  | H      | 17 | 1996.7326       | 998.8699        | 666.2490        |
|         | 916.3548        | 458.6810        | 306.1231        | 8  | S[167] | 16 | 1859.6736       | 930.3405        | 620.5627        |
|         | 1013.4076       | 507.2074        | 338.4740        | 9  | P      | 15 | 1692.6753       | 846.8413        | 564.8966        |
|         | 1126.4916       | 563.7495        | 376.1687        | 10 | I      | 14 | 1595.6225       | 798.3149        | 532.5457        |
|         | 1227.5393       | 614.2733        | 409.8513        | 11 | T      | 13 | 1482.5385       | 741.7729        | 494.8510        |
|         | 1342.5662       | 671.7868        | 448.1936        | 12 | D      | 12 | 1381.4908       | 691.2490        | 461.1684        |
|         | 1456.6092       | 728.8082        | 486.2079        | 13 | N      | 11 | 1266.4638       | 633.7356        | 422.8261        |
|         | 1623.6075       | 812.3074        | 541.8740        | 14 | S[167] | 10 | 1152.4209       | 576.7141        | 384.8118        |
|         | 1790.6059       | 895.8066        | 597.5402        | 15 | S[167] | 9  | 985.4226        | 493.2149        | 329.1457        |
|         | 1889.6743       | 945.3408        | 630.5630        | 16 | V      | 8  | 818.4242        | 409.7157        | 273.4796        |
|         | 1960.7114       | 980.8593        | 654.2420        | 17 | A      | 7  | 719.3558        | 360.1815        | 240.4568        |
|         | 2047.7434       | 1024.3754       | 683.2527        | 18 | S      | 6  | 648.3187        | 324.6630        | 216.7777        |
|         | 2134.7755       | 1067.8914       | 712.2633        | 19 | S      | 5  | 561.2866        | 281.1470        | 187.7671        |
|         | 2235.8232       | 1118.4152       | 745.9459        | 20 | T      | 4  | 474.2546        | 237.6309        | 158.7564        |
|         | 2336.8708       | 1168.9391       | 779.6285        | 21 | T      | 3  | 373.2069        | 187.1071        | 125.0738        |
|         | 2423.9029       | 1212.4551       | 808.6391        | 22 | S      | 2  | 272.1592        | 136.5833        | 91.3913         |
|         |                 |                 |                 | 23 | R[166] | 1  | 185.1272        | 93.0672         | 62.3806         |

# Annotated spectra from Saleem et. al. 2009

R.RSEVFLS<sub>167</sub>PS<sub>167</sub>PRL/2

0.9971

1e+04

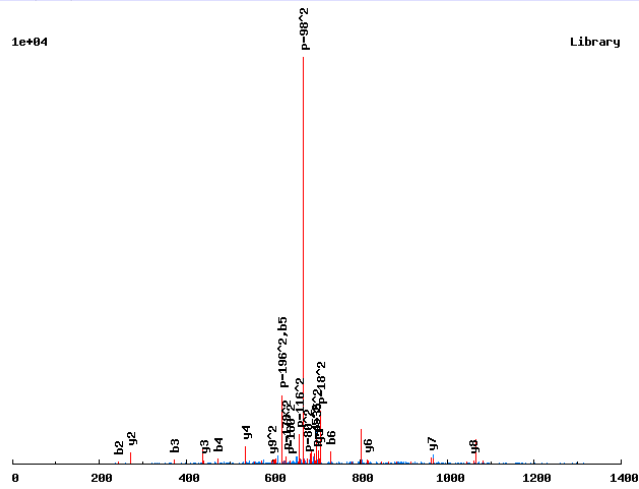

| Library | b <sup>1+</sup> | b <sup>2+</sup> | #  | AA     | #  | y <sup>1+</sup> | y <sup>2+</sup> |
|---------|-----------------|-----------------|----|--------|----|-----------------|-----------------|
|         | 157.1084        | 79.0578         | 1  | R      | 11 |                 |                 |
|         | 244.1404        | 122.5739        | 2  | S      | 10 | 1278.5167       | 639.7620        |
|         | 373.1830        | 187.0951        | 3  | E      | 9  | 1191.4847       | 596.2460        |
|         | 472.2514        | 236.6293        | 4  | V      | 8  | 1062.4421       | 531.7247        |
|         | 619.3198        | 310.1636        | 5  | F      | 7  | 963.3737        | 482.1905        |
|         | 732.4039        | 366.7056        | 6  | L      | 6  | 816.3053        | 408.6563        |
|         | 899.4023        | 450.2048        | 7  | S[167] | 5  | 703.2212        | 352.1142        |
|         | 996.4550        | 498.7311        | 8  | P      | 4  | 536.2228        | 268.6151        |
|         | 1163.4534       | 582.2303        | 9  | S[167] | 3  | 439.1701        | 220.0887        |
|         | 1260.5061       | 630.7567        | 10 | P      | 2  | 272.1717        | 136.5895        |
|         |                 |                 | 11 | R      | 1  | 175.1190        | 88.0631         |

# Annotated spectra from Saleem et. al. 2009

R.RSHPEES<sub>167</sub>-LES<sub>167</sub>-LPR.F/3

0.5842

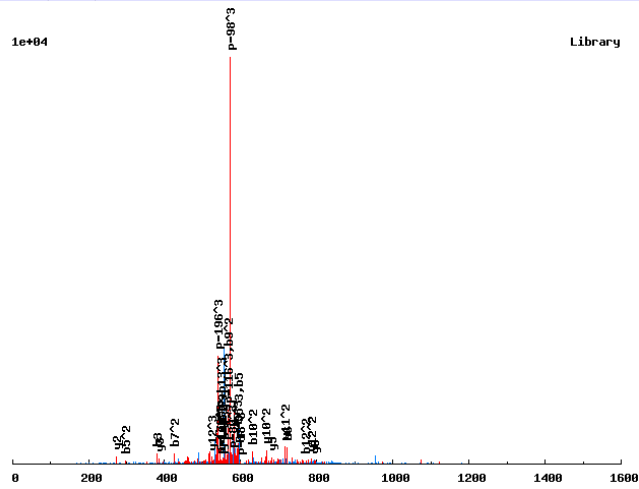

| Library | b <sup>1+</sup> | b <sup>2+</sup> | b <sup>3+</sup> | #  | AA     | #  | y <sup>1+</sup> | y <sup>2+</sup> | y <sup>3+</sup> |
|---------|-----------------|-----------------|-----------------|----|--------|----|-----------------|-----------------|-----------------|
|         | 157.1084        | 79.0578         | 53.0410         | 1  | R      | 14 |                 |                 |                 |
|         | 244.1404        | 122.5739        | 82.0517         | 2  | S      | 13 | 1655.6350       | 828.3211        | 552.5498        |
|         | 381.1993        | 191.1033        | 127.7380        | 3  | H      | 12 | 1568.6029       | 784.8051        | 523.5392        |
|         | 478.2521        | 239.6297        | 160.0889        | 4  | P      | 11 | 1431.5440       | 716.2757        | 477.8529        |
|         | 593.2790        | 297.1432        | 198.4312        | 5  | D      | 10 | 1334.4913       | 667.7493        | 445.5019        |
|         | 722.3216        | 361.6645        | 241.4454        | 6  | E      | 9  | 1219.4643       | 610.2358        | 407.1596        |
|         | 851.3642        | 426.1857        | 284.4596        | 7  | E      | 8  | 1090.4217       | 545.7145        | 364.1454        |
|         | 1018.3626       | 509.6849        | 340.1257        | 8  | S[167] | 7  | 961.3791        | 481.1932        | 321.1312        |
|         | 1131.4466       | 566.2270        | 377.8204        | 9  | L      | 6  | 794.3808        | 397.6940        | 265.4651        |
|         | 1260.4892       | 630.7483        | 420.8346        | 10 | E      | 5  | 681.2967        | 341.1520        | 227.7704        |
|         | 1427.4876       | 714.2474        | 476.5007        | 11 | S[167] | 4  | 552.2541        | 276.6307        | 184.7562        |
|         | 1540.5716       | 770.7895        | 514.1954        | 12 | L      | 3  | 385.2558        | 193.1315        | 129.0901        |
|         | 1637.6244       | 819.3158        | 546.5463        | 13 | P      | 2  | 272.1717        | 136.5895        | 91.3954         |
|         |                 |                 |                 | 14 | R      | 1  | 175.1190        | 88.0631         | 59.0445         |

# Annotated spectra from Saleem et. al. 2009

R.RSPS<sub>167</sub>NLNST<sub>181</sub>SVT<sub>181</sub>PR.A/2

0.9999

1e+04

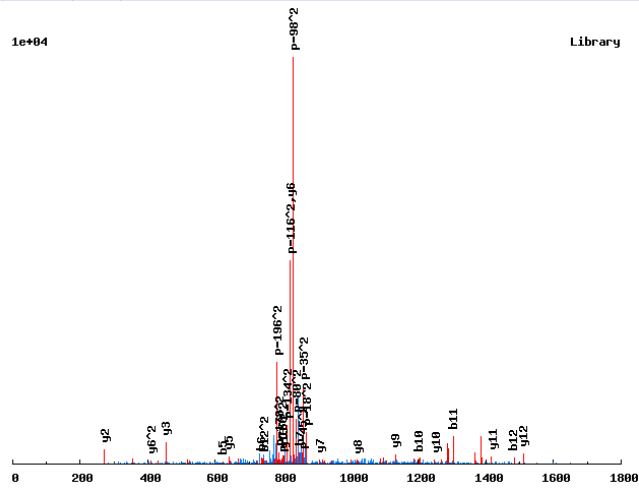

| Library | b <sup>1+</sup> | b <sup>2+</sup> | #  | AA     | #  | y <sup>1+</sup> | y <sup>2+</sup> |
|---------|-----------------|-----------------|----|--------|----|-----------------|-----------------|
|         | 157.1084        | 79.0578         | 1  | R      | 14 |                 |                 |
|         | 244.1404        | 122.5739        | 2  | S      | 13 | 1599.5853       | 800.2963        |
|         | 341.1932        | 171.1002        | 3  | P      | 12 | 1512.5532       | 756.7803        |
|         | 508.1915        | 254.5994        | 4  | S[167] | 11 | 1415.5005       | 708.2539        |
|         | 622.2345        | 311.6209        | 5  | N      | 10 | 1248.5021       | 624.7547        |
|         | 735.3185        | 368.1629        | 6  | L      | 9  | 1134.4592       | 567.7332        |
|         | 849.3615        | 425.1844        | 7  | N      | 8  | 1021.3751       | 511.1912        |
|         | 936.3935        | 468.7004        | 8  | S      | 7  | 907.3322        | 454.1697        |
|         | 1117.4075       | 559.2074        | 9  | T[181] | 6  | 820.3002        | 410.6537        |
|         | 1204.4395       | 602.7234        | 10 | S      | 5  | 639.2862        | 320.1467        |
|         | 1303.5079       | 652.2576        | 11 | V      | 4  | 552.2541        | 276.6307        |
|         | 1484.5220       | 742.7646        | 12 | T[181] | 3  | 453.1857        | 227.0965        |
|         | 1581.5747       | 791.2910        | 13 | P      | 2  | 272.1717        | 136.5895        |
|         |                 |                 | 14 | R      | 1  | 175.1190        | 88.0631         |

# Annotated spectra from Saleem et. al. 2009

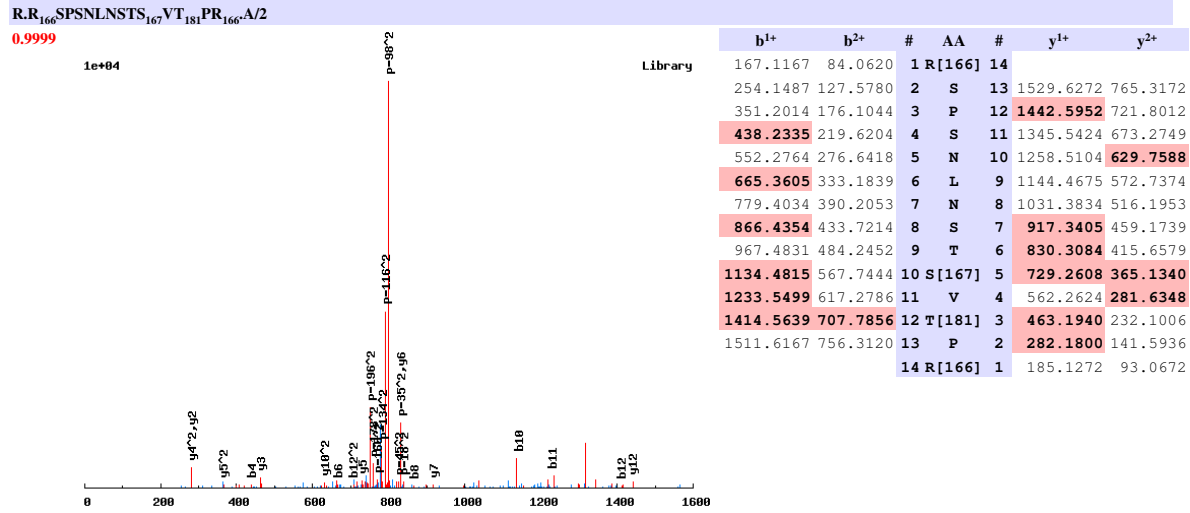



# Annotated spectra from Saleem et. al. 2009

R.R<sub>166</sub>SS<sub>167</sub>AGS<sub>167</sub>FDYER<sub>166</sub>-K/2

0.9961

1e+04

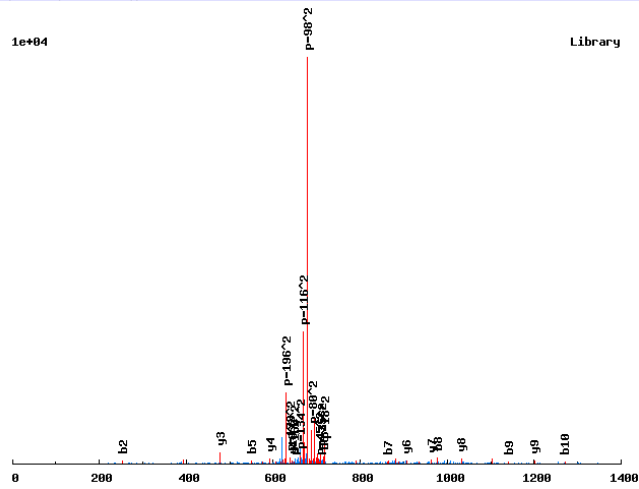

| Library | b <sup>1+</sup>  | b <sup>2+</sup> | #  | AA     | #  | y <sup>1+</sup>  | y <sup>2+</sup> |
|---------|------------------|-----------------|----|--------|----|------------------|-----------------|
|         | 167.1167         | 84.0620         | 1  | R[166] | 11 |                  |                 |
|         | <b>254.1487</b>  | 127.5780        | 2  | S      | 10 | 1288.4158        | <b>644.7115</b> |
|         | 421.1470         | 211.0772        | 3  | S[167] | 9  | <b>1201.3838</b> | 601.1955        |
|         | 492.1842         | 246.5957        | 4  | A      | 8  | <b>1034.3854</b> | 517.6964        |
|         | <b>549.2056</b>  | 275.1065        | 5  | G      | 7  | <b>963.3483</b>  | 482.1778        |
|         | <b>716.2040</b>  | 358.6056        | 6  | S[167] | 6  | <b>906.3269</b>  | 453.6671        |
|         | <b>863.2724</b>  | 432.1398        | 7  | F      | 5  | 739.3285         | 370.1679        |
|         | <b>978.2993</b>  | 489.6533        | 8  | D      | 4  | <b>592.2601</b>  | 296.6337        |
|         | <b>1141.3627</b> | 571.1850        | 9  | Y      | 3  | <b>477.2331</b>  | 239.1202        |
|         | <b>1270.4053</b> | 635.7063        | 10 | E      | 2  | 314.1698         | 157.5885        |
|         |                  |                 | 11 | R[166] | 1  | 185.1272         | 93.0672         |

# Annotated spectra from Saleem et. al. 2009

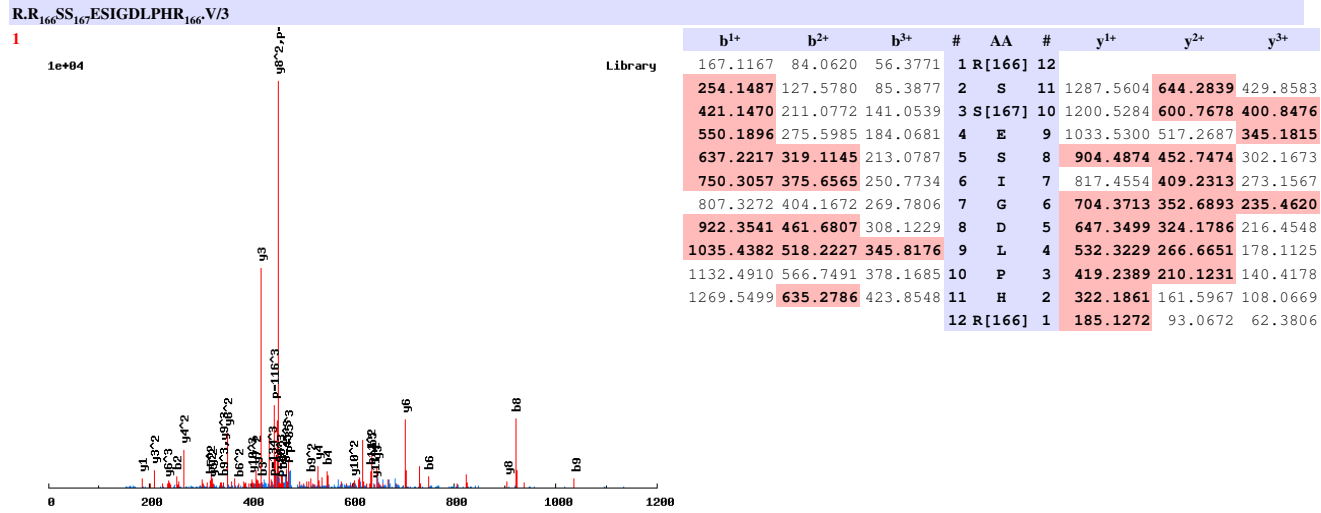

# Annotated spectra from Saleem et. al. 2009

R.RSS<sub>167</sub>IGSQDSS<sub>167</sub>DVEDVKEGRL/3

0.9563

1e+04

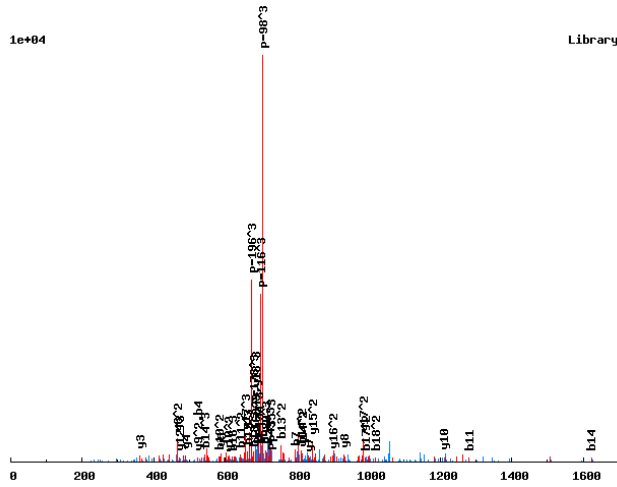

| Library | b <sup>1+</sup>  | b <sup>2+</sup>  | b <sup>3+</sup> | #  | AA     | #  | y <sup>1+</sup>  | y <sup>2+</sup> | y <sup>3+</sup> |
|---------|------------------|------------------|-----------------|----|--------|----|------------------|-----------------|-----------------|
|         | 157.1084         | 79.0578          | 53.0410         | 1  | R      | 19 |                  |                 |                 |
|         | 244.1404         | 122.5739         | 82.0517         | 2  | S      | 18 | 2054.7951        | 1027.9012       | <b>685.6032</b> |
|         | 411.1388         | 206.0730         | 137.7178        | 3  | S[167] | 17 | 1967.7631        | <b>984.3852</b> | <b>656.5925</b> |
|         | <b>524.2228</b>  | 262.6151         | 175.4125        | 4  | I      | 16 | 1800.7647        | <b>900.8860</b> | 600.9264        |
|         | 581.2443         | 291.1258         | 194.4196        | 5  | G      | 15 | 1687.6807        | <b>844.3440</b> | 563.2317        |
|         | 668.2763         | 334.6418         | 223.4303        | 6  | S      | 14 | 1630.6592        | <b>815.8332</b> | 544.2246        |
|         | <b>796.3349</b>  | 398.6711         | 266.1165        | 7  | Q      | 13 | 1543.6272        | 772.3172        | 515.2139        |
|         | 911.3619         | 456.1846         | 304.4588        | 8  | D      | 12 | 1415.5686        | 708.2879        | <b>472.5277</b> |
|         | 998.3939         | 499.7006         | 333.4695        | 9  | S      | 11 | 1300.5416        | 650.7745        | 434.1854        |
|         | 1165.3922        | <b>583.1998</b>  | 389.1356        | 10 | S[167] | 10 | <b>1213.5096</b> | <b>607.2584</b> | 405.1747        |
|         | <b>1280.4192</b> | <b>640.7132</b>  | 427.4779        | 11 | D      | 9  | 1046.5113        | <b>523.7593</b> | 349.5086        |
|         | 1379.4876        | 690.2474         | 460.5007        | 12 | V      | 8  | <b>931.4843</b>  | <b>466.2458</b> | 311.1663        |
|         | 1508.5302        | <b>754.7687</b>  | 503.5149        | 13 | E      | 7  | <b>832.4159</b>  | 416.7116        | 278.1435        |
|         | <b>1623.5571</b> | <b>812.2822</b>  | <b>541.8572</b> | 14 | D      | 6  | <b>703.3733</b>  | 352.1903        | 235.1293        |
|         | 1722.6255        | 861.8164         | 574.8800        | 15 | V      | 5  | <b>588.3464</b>  | 294.6768        | 196.7870        |
|         | 1850.7205        | 925.8639         | <b>617.5784</b> | 16 | K      | 4  | <b>489.2780</b>  | 245.1426        | 163.7642        |
|         | 1979.7631        | <b>990.3852</b>  | <b>660.5925</b> | 17 | E      | 3  | <b>361.1830</b>  | 181.0951        | 121.0659        |
|         | 2036.7845        | <b>1018.8959</b> | <b>679.5997</b> | 18 | G      | 2  | 232.1404         | 116.5738        | 78.0517         |
|         |                  |                  |                 | 19 | R      | 1  | 175.1190         | 88.0631         | 59.0445         |

# Annotated spectra from Saleem et. al. 2009

R.RSS<sub>167</sub>IGS<sub>167</sub>QDS<sub>167</sub>SDVEDVKEGRL/3

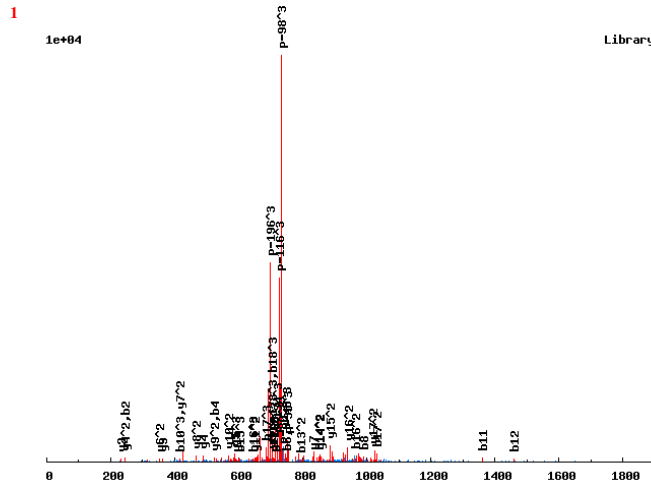

| Library | b <sup>1+</sup>  | b <sup>2+</sup>  | b <sup>3+</sup> | #  | AA     | #  | y <sup>1+</sup> | y <sup>2+</sup>  | y <sup>3+</sup> |
|---------|------------------|------------------|-----------------|----|--------|----|-----------------|------------------|-----------------|
|         | 157.1084         | 79.0578          | 53.0410         | 1  | R      | 19 |                 |                  |                 |
|         | <b>244.1404</b>  | 122.5739         | 82.0517         | 2  | S      | 18 | 2134.7614       | 1067.8844        | 712.2587        |
|         | 411.1388         | 206.0730         | 137.7178        | 3  | S[167] | 17 | 2047.7294       | <b>1024.3683</b> | 683.2480        |
|         | <b>524.2228</b>  | 262.6151         | 175.4125        | 4  | I      | 16 | 1880.7310       | <b>940.8692</b>  | 627.5819        |
|         | 581.2443         | 291.1258         | 194.4196        | 5  | G      | 15 | 1767.6470       | <b>884.3271</b>  | <b>589.8872</b> |
|         | <b>748.2427</b>  | 374.6250         | 250.0857        | 6  | S[167] | 14 | 1710.6255       | <b>855.8164</b>  | 570.8800        |
|         | 876.3012         | 438.6543         | 292.7719        | 7  | Q      | 13 | 1543.6272       | 772.3172         | 515.2139        |
|         | <b>991.3282</b>  | 496.1677         | 331.1142        | 8  | D      | 12 | 1415.5686       | <b>708.2879</b>  | 472.5277        |
|         | 1158.3265        | 579.6669         | 386.7804        | 9  | S[167] | 11 | 1300.5416       | <b>650.7745</b>  | 434.1854        |
|         | 1245.3586        | 623.1829         | <b>415.7910</b> | 10 | S      | 10 | 1133.5433       | <b>567.2753</b>  | 378.5193        |
|         | <b>1360.3855</b> | 680.6964         | 454.1334        | 11 | D      | 9  | 1046.5113       | <b>523.7593</b>  | 349.5086        |
|         | <b>1459.4539</b> | 730.2306         | 487.1562        | 12 | V      | 8  | 931.4843        | <b>466.2458</b>  | 311.1663        |
|         | 1588.4965        | <b>794.7519</b>  | 530.1704        | 13 | E      | 7  | <b>832.4159</b> | <b>416.7116</b>  | 278.1435        |
|         | 1703.5235        | <b>852.2654</b>  | 568.5127        | 14 | D      | 6  | <b>703.3733</b> | <b>352.1903</b>  | 235.1293        |
|         | 1802.5919        | 901.7996         | <b>601.5355</b> | 15 | V      | 5  | <b>588.3464</b> | 294.6768         | 196.7870        |
|         | 1930.6868        | <b>965.8471</b>  | <b>644.2338</b> | 16 | K      | 4  | <b>489.2780</b> | <b>245.1426</b>  | 163.7642        |
|         | 2059.7294        | <b>1030.3683</b> | <b>687.2480</b> | 17 | E      | 3  | <b>361.1830</b> | 181.0951         | 121.0659        |
|         | 2116.7509        | 1058.8791        | <b>706.2551</b> | 18 | G      | 2  | <b>232.1404</b> | 116.5738         | 78.0517         |
|         |                  |                  |                 | 19 | R      | 1  | 175.1190        | 88.0631          | 59.0445         |

# Annotated spectra from Saleem et. al. 2009

R.RSS<sub>167</sub>LNS<sub>167</sub>LGNSAYLHVPR.N/3

0.9909

1e+04

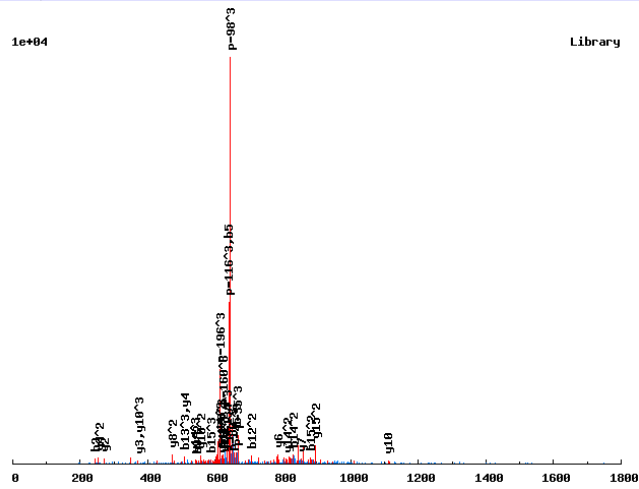

| Library | b <sup>1+</sup> | b <sup>2+</sup> | b <sup>3+</sup> | #  | AA     | #  | y <sup>1+</sup>  | y <sup>2+</sup> | y <sup>3+</sup> |
|---------|-----------------|-----------------|-----------------|----|--------|----|------------------|-----------------|-----------------|
|         | 157.1084        | 79.0578         | 53.0410         | 1  | R      | 17 |                  |                 |                 |
|         | <b>244.1404</b> | 122.5739        | 82.0517         | 2  | S      | 16 | 1874.8198        | 937.9135        | <b>625.6114</b> |
|         | 411.1388        | 206.0730        | 137.7178        | 3  | S[167] | 15 | 1787.7877        | <b>894.3975</b> | 596.6008        |
|         | 524.2228        | 262.6151        | 175.4125        | 4  | L      | 14 | 1620.7894        | <b>810.8983</b> | <b>540.9346</b> |
|         | <b>638.2658</b> | 319.6365        | 213.4268        | 5  | N      | 13 | 1507.7053        | 754.3563        | 503.2400        |
|         | 805.2641        | 403.1357        | 269.0929        | 6  | S[167] | 12 | 1393.6624        | 697.3348        | 465.2256        |
|         | 918.3482        | 459.6777        | 306.7876        | 7  | L      | 11 | 1226.6640        | <b>613.8356</b> | 409.5595        |
|         | 975.3697        | 488.1885        | 325.7947        | 8  | G      | 10 | <b>1113.5800</b> | <b>557.2936</b> | <b>371.8648</b> |
|         | 1089.4126       | <b>545.2099</b> | 363.8090        | 9  | N      | 9  | 1056.5585        | 528.7829        | 352.8577        |
|         | 1176.4446       | 588.7259        | 392.8197        | 10 | S      | 8  | 942.5156         | <b>471.7614</b> | 314.8434        |
|         | 1247.4817       | <b>624.2445</b> | 416.4988        | 11 | A      | 7  | <b>855.4835</b>  | 428.2454        | 285.8327        |
|         | 1410.5451       | <b>705.7762</b> | 470.8532        | 12 | Y      | 6  | <b>784.4464</b>  | 392.7269        | 262.1537        |
|         | 1523.6291       | 762.3182        | <b>508.5479</b> | 13 | L      | 5  | <b>621.3831</b>  | 311.1952        | 207.7992        |
|         | 1660.6880       | <b>830.8477</b> | 554.2342        | 14 | H      | 4  | <b>508.2990</b>  | <b>254.6532</b> | 170.1045        |
|         | 1759.7564       | <b>880.3819</b> | <b>587.2570</b> | 15 | V      | 3  | <b>371.2401</b>  | 186.1237        | 124.4182        |
|         | 1856.8092       | 928.9082        | 619.6079        | 16 | P      | 2  | <b>272.1717</b>  | 136.5895        | 91.3954         |
|         |                 |                 |                 | 17 | R      | 1  | 175.1190         | 88.0631         | 59.0445         |

# Annotated spectra from Saleem et. al. 2009

R.RSS<sub>167</sub>NYS<sub>167</sub>LDGSNSLK.A/2

0.9947

1e+04

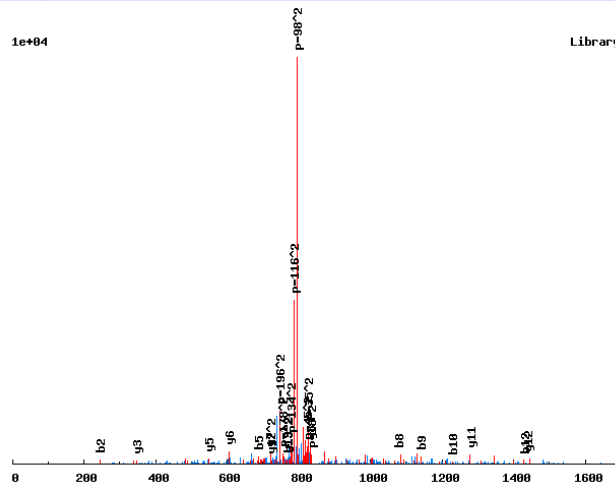

| Library | b <sup>1+</sup>  | b <sup>2+</sup> | #  | AA     | #  | y <sup>1+</sup>  | y <sup>2+</sup> |
|---------|------------------|-----------------|----|--------|----|------------------|-----------------|
|         | 157.1084         | 79.0578         | 1  | R      | 14 |                  |                 |
|         | <b>244.1404</b>  | 122.5739        | 2  | S      | 13 | 1531.5713        | <b>766.2893</b> |
|         | 411.1388         | 206.0730        | 3  | S[167] | 12 | <b>1444.5393</b> | <b>722.7733</b> |
|         | 525.1817         | 263.0945        | 4  | N      | 11 | <b>1277.5409</b> | 639.2741        |
|         | <b>688.2450</b>  | 344.6262        | 5  | Y      | 10 | 1163.4980        | 582.2526        |
|         | 855.2434         | 428.1253        | 6  | S[167] | 9  | 1000.4347        | 500.7210        |
|         | 968.3275         | 484.6674        | 7  | L      | 8  | <b>833.4363</b>  | 417.2218        |
|         | <b>1083.3544</b> | 542.1808        | 8  | D      | 7  | <b>720.3523</b>  | 360.6798        |
|         | <b>1140.3759</b> | 570.6916        | 9  | G      | 6  | <b>605.3253</b>  | 303.1663        |
|         | <b>1227.4079</b> | 614.2076        | 10 | S      | 5  | <b>548.3039</b>  | 274.6556        |
|         | 1341.4508        | 671.2291        | 11 | N      | 4  | 461.2718         | 231.1395        |
|         | <b>1428.4829</b> | 714.7451        | 12 | S      | 3  | <b>347.2289</b>  | 174.1181        |
|         | 1541.5669        | <b>771.2871</b> | 13 | L      | 2  | 260.1969         | 130.6021        |
|         |                  |                 | 14 | K      | 1  | 147.1128         | 74.0600         |

# Annotated spectra from Saleem et. al. 2009

R.RSS<sub>167</sub>RLS<sub>167</sub>LDSITPR.R/3

0.7965

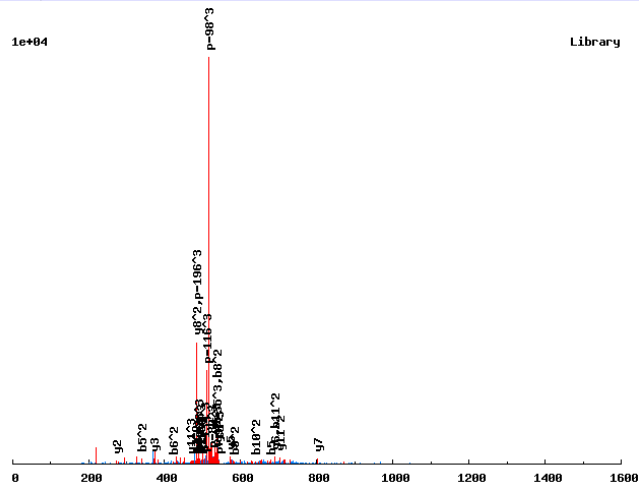

| Library | b <sup>1+</sup> | b <sup>2+</sup> | b <sup>3+</sup> | #  | AA     | #  | y <sup>1+</sup> | y <sup>2+</sup> | y <sup>3+</sup> |
|---------|-----------------|-----------------|-----------------|----|--------|----|-----------------|-----------------|-----------------|
|         | 157.1084        | 79.0578         | 53.0410         | 1  | R      | 13 |                 |                 |                 |
|         | 244.1404        | 122.5739        | 82.0517         | 2  | S      | 12 | 1491.6604       | 746.3338        | 497.8917        |
|         | 411.1388        | 206.0730        | 137.7178        | 3  | S[167] | 11 | 1404.6284       | 702.8178        | 468.8810        |
|         | 567.2399        | 284.1236        | 189.7515        | 4  | R      | 10 | 1237.6300       | 619.3186        | 413.2149        |
|         | 680.3240        | 340.6656        | 227.4462        | 5  | L      | 9  | 1081.5289       | 541.2681        | 361.1812        |
|         | 847.3223        | 424.1648        | 283.1123        | 6  | S[167] | 8  | 968.4448        | 484.7261        | 323.4865        |
|         | 960.4064        | 480.7068        | 320.8070        | 7  | L      | 7  | 801.4465        | 401.2269        | 267.8203        |
|         | 1075.4333       | 538.2203        | 359.1493        | 8  | D      | 6  | 688.3624        | 344.6849        | 230.1257        |
|         | 1162.4653       | 581.7363        | 388.1600        | 9  | S      | 5  | 573.3355        | 287.1714        | 191.7833        |
|         | 1275.5494       | 638.2783        | 425.8547        | 10 | I      | 4  | 486.3034        | 243.6554        | 162.7727        |
|         | 1376.5971       | 688.8022        | 459.5372        | 11 | T      | 3  | 373.2194        | 187.1133        | 125.0780        |
|         | 1473.6498       | 737.3286        | 491.8881        | 12 | P      | 2  | 272.1717        | 136.5895        | 91.3954         |
|         |                 |                 |                 | 13 | R      | 1  | 175.1190        | 88.0631         | 59.0445         |

# Annotated spectra from Saleem et. al. 2009

R.R<sub>166</sub>SS<sub>167</sub>S<sub>167</sub>FTETVPTEPR<sub>166</sub>.Y/2

0.9999

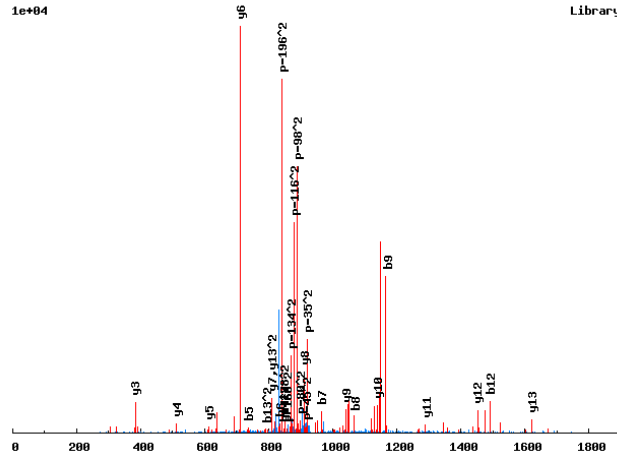

| Library | b <sup>1+</sup> | b <sup>2+</sup> | #  | AA     | #  | y <sup>1+</sup> | y <sup>2+</sup> |
|---------|-----------------|-----------------|----|--------|----|-----------------|-----------------|
|         | 167.1167        | 84.0620         | 1  | R[166] | 15 |                 |                 |
|         | 254.1487        | 127.5780        | 2  | S      | 14 | 1708.6742       | 854.8407        |
|         | 421.1470        | 211.0772        | 3  | S[167] | 13 | 1621.6422       | 811.3247        |
|         | 588.1454        | 294.5763        | 4  | S[167] | 12 | 1454.6438       | 727.8256        |
|         | 735.2138        | 368.1106        | 5  | F      | 11 | 1287.6455       | 644.3264        |
|         | 836.2615        | 418.6344        | 6  | T      | 10 | 1140.5770       | 570.7922        |
|         | 965.3041        | 483.1557        | 7  | E      | 9  | 1039.5294       | 520.2683        |
|         | 1066.3518       | 533.6795        | 8  | T      | 8  | 910.4868        | 455.7470        |
|         | 1165.4202       | 583.2137        | 9  | V      | 7  | 809.4391        | 405.2232        |
|         | 1262.4729       | 631.7401        | 10 | P      | 6  | 710.3707        | 355.6890        |
|         | 1363.5206       | 682.2640        | 11 | T      | 5  | 613.3179        | 307.1626        |
|         | 1492.5632       | 746.7852        | 12 | E      | 4  | 512.2702        | 256.6388        |
|         | 1589.6160       | 795.3116        | 13 | P      | 3  | 383.2277        | 192.1175        |
|         | 1690.6637       | 845.8355        | 14 | T      | 2  | 286.1749        | 143.5911        |
|         |                 |                 | 15 | R[166] | 1  | 185.1272        | 93.0672         |



# Annotated spectra from Saleem et. al. 2009

R.RS<sub>167</sub>SS<sub>167</sub>MLLNELK.G/2

0.9921

1e+04

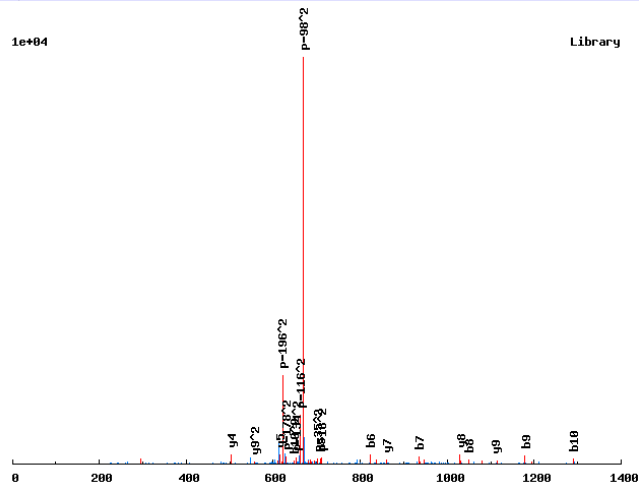

| Library | b <sup>1+</sup> | b <sup>2+</sup> | #  | AA     | #  | y <sup>1+</sup> | y <sup>2+</sup> |
|---------|-----------------|-----------------|----|--------|----|-----------------|-----------------|
|         | 157.1084        | 79.0578         | 1  | R      | 11 |                 |                 |
|         | 324.1068        | 162.5570        | 2  | S[167] | 10 | 1281.5197       | 641.2635        |
|         | 411.1388        | 206.0730        | 3  | S      | 9  | 1114.5214       | 557.7643        |
|         | 578.1371        | 289.5722        | 4  | S[167] | 8  | 1027.4894       | 514.2483        |
|         | 709.1776        | 355.0925        | 5  | M      | 7  | 860.4910        | 430.7491        |
|         | 822.2617        | 411.6345        | 6  | L      | 6  | 729.4505        | 365.2289        |
|         | 935.3458        | 468.1765        | 7  | L      | 5  | 616.3664        | 308.6869        |
|         | 1049.3887       | 525.1980        | 8  | N      | 4  | 503.2824        | 252.1448        |
|         | 1178.4313       | 589.7193        | 9  | E      | 3  | 389.2394        | 195.1234        |
|         | 1291.5153       | 646.2613        | 10 | L      | 2  | 260.1969        | 130.6021        |
|         |                 |                 | 11 | K      | 1  | 147.1128        | 74.0600         |

# Annotated spectra from Saleem et. al. 2009

K.RSS<sub>167</sub>ST<sub>181</sub>GTGSAMSGGLATR.H/3

0.8849

1e+04

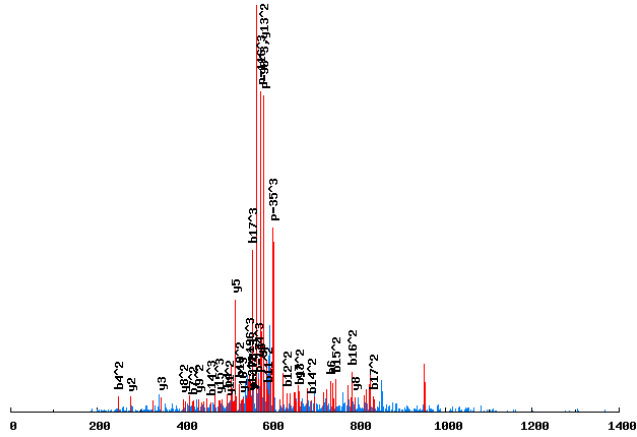

| Library | b <sup>1+</sup> | b <sup>2+</sup> | b <sup>3+</sup> | #  | AA     | #  | y <sup>1+</sup> | y <sup>2+</sup> | y <sup>3+</sup> |
|---------|-----------------|-----------------|-----------------|----|--------|----|-----------------|-----------------|-----------------|
|         | 157.1084        | 79.0578         | 53.0410         | 1  | R      | 18 |                 |                 |                 |
|         | 244.1404        | 122.5739        | 82.0517         | 2  | S      | 17 | 1687.6394       | 844.3233        | 563.2180        |
|         | 411.1388        | 206.0730        | 137.7178        | 3  | S[167] | 16 | 1600.6074       | 800.8073        | 534.2073        |
|         | 498.1708        | 249.5890        | 166.7285        | 4  | S      | 15 | 1433.6090       | 717.3082        | 478.5412        |
|         | 679.1848        | 340.0961        | 227.0665        | 5  | T[181] | 14 | 1346.5770       | 673.7921        | 449.5305        |
|         | 736.2063        | 368.6068        | 246.0736        | 6  | G      | 13 | 1165.5630       | 583.2851        | 389.1925        |
|         | 837.2540        | 419.1306        | 279.7562        | 7  | T      | 12 | 1108.5415       | 554.7744        | 370.1854        |
|         | 894.2754        | 447.6414        | 298.7633        | 8  | G      | 11 | 1007.4938       | 504.2506        | 336.5028        |
|         | 981.3075        | 491.1574        | 327.7740        | 9  | S      | 10 | 950.4724        | 475.7398        | 317.4956        |
|         | 1052.3446       | 526.6759        | 351.4530        | 10 | A      | 9  | 863.4404        | 432.2238        | 288.4850        |
|         | 1183.3851       | 592.1962        | 395.1332        | 11 | M      | 8  | 792.4032        | 396.7053        | 264.8059        |
|         | 1270.4171       | 635.7122        | 424.1439        | 12 | S      | 7  | 661.3628        | 331.1850        | 221.1258        |
|         | 1327.4385       | 664.2229        | 443.1510        | 13 | G      | 6  | 574.3307        | 287.6690        | 192.1151        |
|         | 1384.4600       | 692.7336        | 462.1582        | 14 | G      | 5  | 517.3093        | 259.1583        | 173.1079        |
|         | 1497.5441       | 749.2757        | 499.8529        | 15 | L      | 4  | 460.2878        | 230.6475        | 154.1008        |
|         | 1568.5812       | 784.7942        | 523.5319        | 16 | A      | 3  | 347.2037        | 174.1055        | 116.4061        |
|         | 1669.6289       | 835.3181        | 557.2145        | 17 | T      | 2  | 276.1666        | 138.5870        | 92.7271         |
|         |                 |                 |                 | 18 | R      | 1  | 175.1190        | 88.0631         | 59.0445         |

# Annotated spectra from Saleem et. al. 2009

R.R<sub>166</sub>SS<sub>167</sub>T<sub>181</sub>PETENAFSAT<sub>181</sub>PR<sub>166</sub>-A/2

0.9999

1e+04

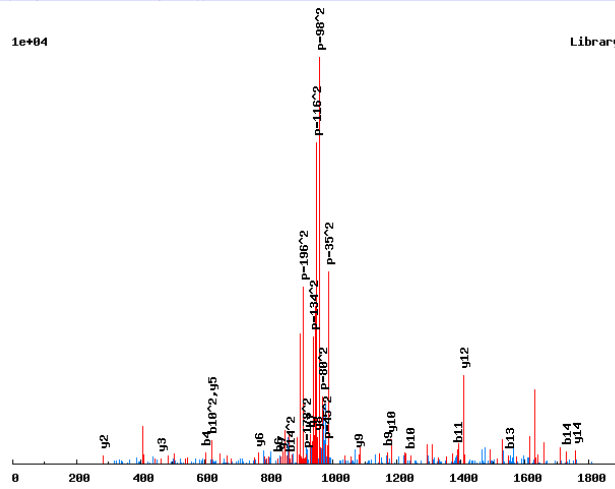

| Library | b <sup>1+</sup> | b <sup>2+</sup> | #  | AA     | #  | y <sup>1+</sup> | y <sup>2+</sup> |
|---------|-----------------|-----------------|----|--------|----|-----------------|-----------------|
|         | 167.1167        | 84.0620         | 1  | R[166] | 16 |                 |                 |
|         | 254.1487        | 127.5780        | 2  | S      | 15 | 1844.6416       | 922.8244        |
|         | 421.1470        | 211.0772        | 3  | S[167] | 14 | 1757.6096       | 879.3084        |
|         | 602.1611        | 301.5842        | 4  | T[181] | 13 | 1590.6112       | 795.8092        |
|         | 699.2138        | 350.1106        | 5  | P      | 12 | 1409.5972       | 705.3022        |
|         | 828.2564        | 414.6318        | 6  | E      | 11 | 1312.5444       | 656.7759        |
|         | 929.3041        | 465.1557        | 7  | T      | 10 | 1183.5018       | 592.2546        |
|         | 1058.3467       | 529.6770        | 8  | E      | 9  | 1082.4542       | 541.7307        |
|         | 1172.3896       | 586.6984        | 9  | N      | 8  | 953.4116        | 477.2094        |
|         | 1243.4267       | 622.2170        | 10 | A      | 7  | 839.3687        | 420.1880        |
|         | 1390.4951       | 695.7512        | 11 | F      | 6  | 768.3315        | 384.6694        |
|         | 1477.5272       | 739.2672        | 12 | S      | 5  | 621.2631        | 311.1352        |
|         | 1548.5643       | 774.7858        | 13 | A      | 4  | 534.2311        | 267.6192        |
|         | 1729.5783       | 865.2928        | 14 | T[181] | 3  | 463.1940        | 232.1006        |
|         | 1826.6310       | 913.8192        | 15 | P      | 2  | 282.1800        | 141.5936        |
|         |                 |                 | 16 | R[166] | 1  | 185.1272        | 93.0672         |



# Annotated spectra from Saleem et. al. 2009

R.RS<sub>167</sub>TT<sub>181</sub>HDVGEISNNVK.I/2

0.9996

1e+04

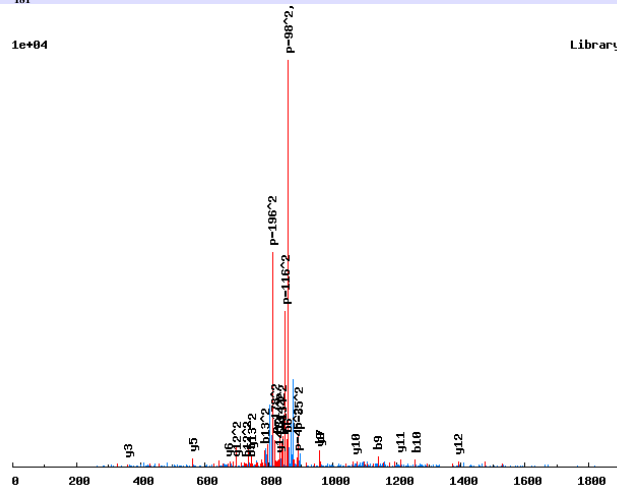

| Library | b <sup>1+</sup> | b <sup>2+</sup> | #  | AA     | #  | y <sup>1+</sup> | y <sup>2+</sup> |
|---------|-----------------|-----------------|----|--------|----|-----------------|-----------------|
|         | 157.1084        | 79.0578         | 1  | R      | 15 |                 |                 |
|         | 324.1068        | 162.5570        | 2  | S[167] | 14 | 1660.6615       | 830.8344        |
|         | 425.1544        | 213.0809        | 3  | T      | 13 | 1493.6632       | 747.3352        |
|         | 606.1684        | 303.5879        | 4  | T[181] | 12 | 1392.6155       | 696.8114        |
|         | 743.2274        | 372.1173        | 5  | H      | 11 | 1211.6015       | 606.3044        |
|         | 858.2543        | 429.6308        | 6  | D      | 10 | 1074.5426       | 537.7749        |
|         | 957.3227        | 479.1650        | 7  | V      | 9  | 959.5156        | 480.2615        |
|         | 1014.3442       | 507.6757        | 8  | G      | 8  | 860.4472        | 430.7272        |
|         | 1143.3868       | 572.1970        | 9  | E      | 7  | 803.4258        | 402.2165        |
|         | 1256.4708       | 628.7390        | 10 | I      | 6  | 674.3832        | 337.6952        |
|         | 1343.5028       | 672.2551        | 11 | S      | 5  | 561.2991        | 281.1532        |
|         | 1457.5458       | 729.2765        | 12 | N      | 4  | 474.2671        | 237.6372        |
|         | 1571.5887       | 786.2980        | 13 | N      | 3  | 360.2241        | 180.6157        |
|         | 1670.6571       | 835.8322        | 14 | V      | 2  | 246.1812        | 123.5942        |
|         |                 |                 | 15 | K      | 1  | 147.1128        | 74.0600         |

# Annotated spectra from Saleem et. al. 2009

R.R.<sub>166</sub>TLS<sub>167</sub>LGK<sub>136</sub>S/2

0.6248

1e+04

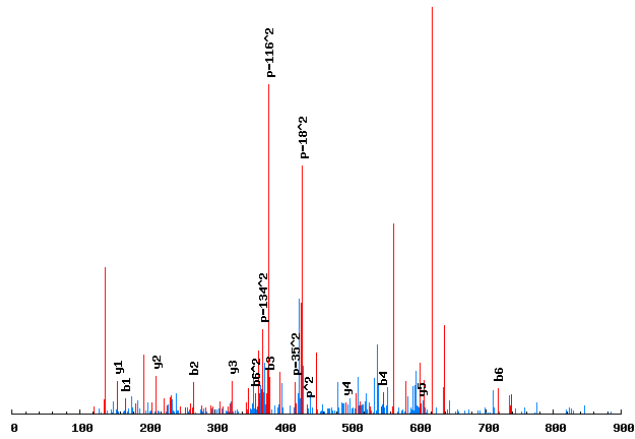

| Library | b <sup>1+</sup> | b <sup>2+</sup> | # | AA     | # | y <sup>1+</sup> | y <sup>2+</sup> |
|---------|-----------------|-----------------|---|--------|---|-----------------|-----------------|
|         | 167.1167        | 84.0620         | 1 | R[166] | 7 |                 |                 |
|         | 268.1643        | 134.0620        | 2 | T      | 6 | 706.3626        | 353.6850        |
|         | 381.2484        | 191.1278        | 3 | L      | 5 | 605.3149        | 303.1611        |
|         | 548.2468        | 274.6270        | 4 | S[167] | 4 | 492.2309        | 246.6191        |
|         | 661.3308        | 331.1691        | 5 | L      | 3 | 325.2325        | 163.1199        |
|         | 718.3523        | 359.6798        | 6 | G      | 2 | 212.1485        | 106.5779        |
|         |                 |                 |   | K[136] | 1 | 155.1270        | 78.0671         |

# Annotated spectra from Saleem et. al. 2009

R.R<sub>166</sub>T<sub>181</sub>LS<sub>167</sub>LGK<sub>136</sub>S/2

0.6304

1e+04

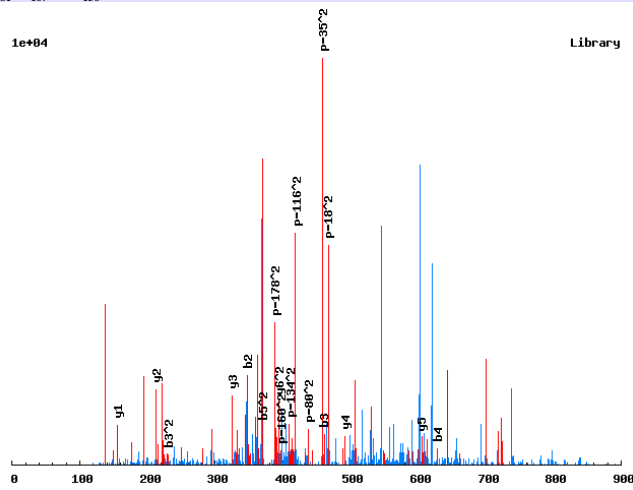

| Library | b <sup>1+</sup> | b <sup>2+</sup> | # | AA     | # | y <sup>1+</sup> | y <sup>2+</sup> |
|---------|-----------------|-----------------|---|--------|---|-----------------|-----------------|
|         | 167.1167        | 84.0620         | 1 | R[166] | 7 |                 |                 |
|         | 348.1307        | 174.5690        | 2 | T[181] | 6 | 786.3290        | 393.6681        |
|         | 461.2147        | 231.1110        | 3 | L      | 5 | 605.3149        | 303.1611        |
|         | 628.2131        | 314.6102        | 4 | S[167] | 4 | 492.2309        | 246.6191        |
|         | 741.2972        | 371.1522        | 5 | L      | 3 | 325.2325        | 163.1199        |
|         | 798.3186        | 399.6629        | 6 | G      | 2 | 212.1485        | 106.5779        |
|         |                 |                 | 7 | K[136] | 1 | 155.1270        | 78.0671         |

# Annotated spectra from Saleem et. al. 2009

R.R<sub>166</sub>TS<sub>167</sub>GR<sub>166</sub>LS<sub>167</sub>VDQEPR<sub>166</sub>I/2

0.9752

1e+04

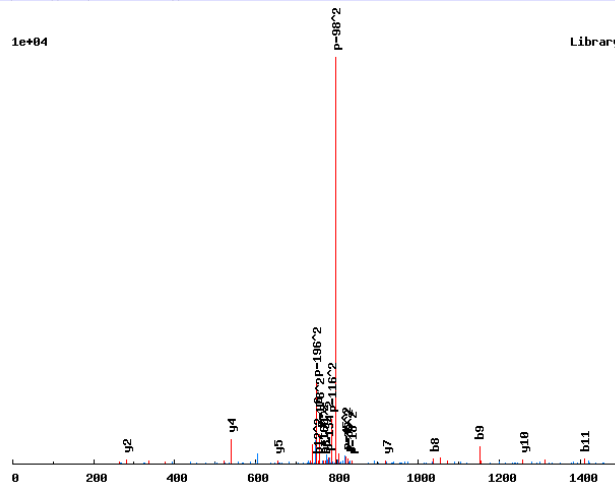

Library

|  | b <sup>1+</sup> | b <sup>2+</sup> | #  | AA     | #  | y <sup>1+</sup> | y <sup>2+</sup> |
|--|-----------------|-----------------|----|--------|----|-----------------|-----------------|
|  | 167.1167        | 84.0620         | 1  | R[166] | 13 |                 |                 |
|  | 268.1643        | 134.5858        | 2  | T      | 12 | 1524.6358       | 762.8215        |
|  | 435.1627        | 218.0850        | 3  | S[167] | 11 | 1423.5881       | 712.2977        |
|  | 492.1842        | 246.5957        | 4  | G      | 10 | 1256.5898       | 628.7985        |
|  | 658.2935        | 329.6504        | 5  | R[166] | 9  | 1199.5683       | 600.2878        |
|  | 771.3776        | 386.1924        | 6  | L      | 8  | 1033.4589       | 517.2331        |
|  | 938.3760        | 469.6916        | 7  | S[167] | 7  | 920.3749        | 460.6911        |
|  | 1037.4444       | 519.2258        | 8  | V      | 6  | 753.3765        | 377.1919        |
|  | 1152.4713       | 576.7393        | 9  | D      | 5  | 654.3081        | 327.6577        |
|  | 1280.5299       | 640.7686        | 10 | Q      | 4  | 539.2811        | 270.1442        |
|  | 1409.5725       | 705.2899        | 11 | E      | 3  | 411.2226        | 206.1149        |
|  | 1506.6252       | 753.8163        | 12 | P      | 2  | 282.1800        | 141.5936        |
|  |                 |                 | 13 | R[166] | 1  | 185.1272        | 93.0672         |



# Annotated spectra from Saleem et. al. 2009

R.RTS<sub>167</sub>NSYS<sub>167</sub>PLR.Y/2

0.9658

1e+04

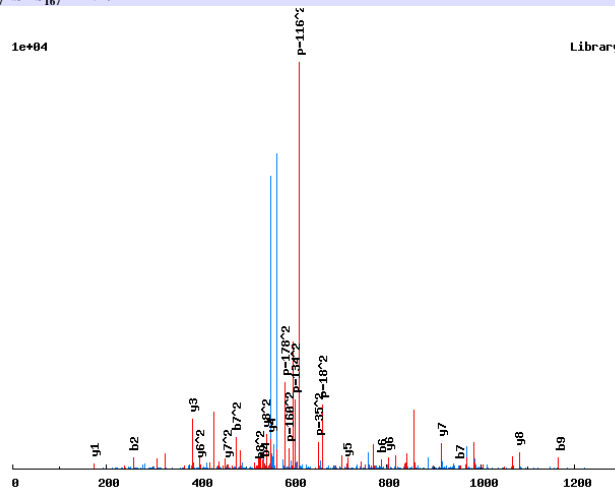

| Library | b <sup>1+</sup>  | b <sup>2+</sup> | #  | AA     | #  | y <sup>1+</sup> | y <sup>2+</sup> |
|---------|------------------|-----------------|----|--------|----|-----------------|-----------------|
|         | 157.1084         | 79.0578         | 1  | R      | 10 |                 |                 |
|         | <b>258.1561</b>  | 129.5817        | 2  | T      | 9  | 1184.4385       | 592.7229        |
|         | 425.1544         | 213.0809        | 3  | S[167] | 8  | 1083.3908       | 542.1990        |
|         | <b>539.1974</b>  | 270.1023        | 4  | N      | 7  | 916.3924        | 458.6999        |
|         | 626.2294         | 313.6183        | 5  | S      | 6  | 802.3495        | 401.6784        |
|         | <b>789.2927</b>  | 395.1500        | 6  | Y      | 5  | 715.3175        | 358.1624        |
|         | <b>956.2911</b>  | <b>478.6492</b> | 7  | S[167] | 4  | 552.2541        | 276.6307        |
|         | 1053.3438        | <b>527.1756</b> | 8  | P      | 3  | <b>385.2558</b> | 193.1315        |
|         | <b>1166.4279</b> | 583.7176        | 9  | L      | 2  | 288.2030        | 144.6051        |
|         |                  |                 | 10 | R      | 1  | <b>175.1190</b> | 88.0631         |

# Annotated spectra from Saleem et. al. 2009

K.RVGDEGNAAES<sub>167</sub>ES<sub>167</sub>DNVAASR.Q/3

0.993

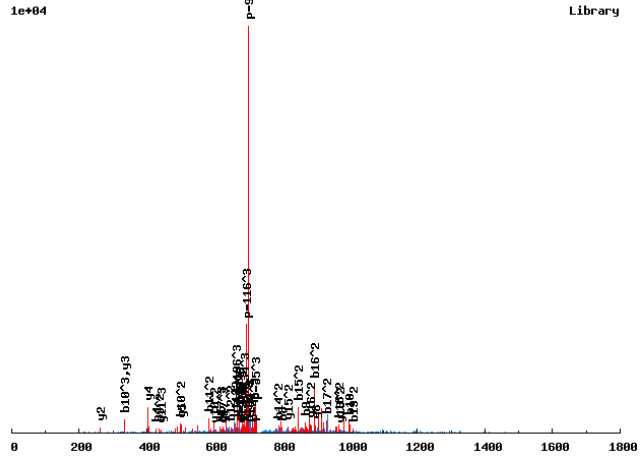

| Library | b <sup>1+</sup> | b <sup>2+</sup> | b <sup>3+</sup> | #  | AA      | #  | y <sup>1+</sup> | y <sup>2+</sup> | y <sup>3+</sup> |
|---------|-----------------|-----------------|-----------------|----|---------|----|-----------------|-----------------|-----------------|
|         | 157.1084        | 79.0578         | 53.0410         | 1  | R       | 20 |                 |                 |                 |
|         | 256.1768        | 128.5920        | 86.0638         | 2  | V       | 19 | 2037.7434       | 1019.3753       | 679.9193        |
|         | 313.1983        | 157.1028        | 105.0709        | 3  | G       | 18 | 1938.6750       | 969.8411        | 646.8965        |
|         | 428.2252        | 214.6162        | 143.4133        | 4  | D       | 17 | 1881.6535       | 941.3304        | 627.8894        |
|         | 557.2678        | 279.1375        | 186.4275        | 5  | E       | 16 | 1766.6266       | 883.8169        | 589.5470        |
|         | 614.2893        | 307.6483        | 205.4346        | 6  | G       | 15 | 1637.5840       | 819.2956        | 546.5329        |
|         | 728.3322        | 364.6697        | 243.4489        | 7  | N       | 14 | 1580.5625       | 790.7849        | 527.5257        |
|         | 799.3693        | 400.1883        | 267.1280        | 8  | A       | 13 | 1466.5196       | 733.7634        | 489.5114        |
|         | 870.4064        | 435.7068        | 290.8070        | 9  | A       | 12 | 1395.4825       | 698.2449        | 465.8324        |
|         | 999.4490        | 500.2281        | 333.8212        | 10 | E       | 11 | 1324.4454       | 662.7263        | 442.1533        |
|         | 1166.4474       | 583.7273        | 389.4873        | 11 | S [167] | 10 | 1195.4028       | 598.2050        | 399.1391        |
|         | 1295.4899       | 648.2486        | 432.5015        | 12 | E       | 9  | 1028.4044       | 514.7059        | 343.4730        |
|         | 1462.4883       | 731.7478        | 488.1676        | 13 | S [167] | 8  | 899.3618        | 450.1846        | 300.4588        |
|         | 1577.5152       | 789.2613        | 526.5099        | 14 | D       | 7  | 732.3635        | 366.6854        | 244.7927        |
|         | 1691.5582       | 846.2827        | 564.5242        | 15 | N       | 6  | 617.3365        | 309.1719        | 206.4504        |
|         | 1790.6266       | 895.8169        | 597.5470        | 16 | V       | 5  | 503.2936        | 252.1504        | 168.4361        |
|         | 1861.6637       | 931.3355        | 621.2261        | 17 | A       | 4  | 404.2252        | 202.6162        | 135.4133        |
|         | 1932.7008       | 966.8540        | 644.9051        | 18 | A       | 3  | 333.1881        | 167.0977        | 111.7342        |
|         | 2019.7328       | 1010.3701       | 673.9158        | 19 | S       | 2  | 262.1510        | 131.5791        | 88.0552         |
|         |                 |                 |                 | 20 | R       | 1  | 175.1190        | 88.0631         | 59.0445         |

# Annotated spectra from Saleem et. al. 2009

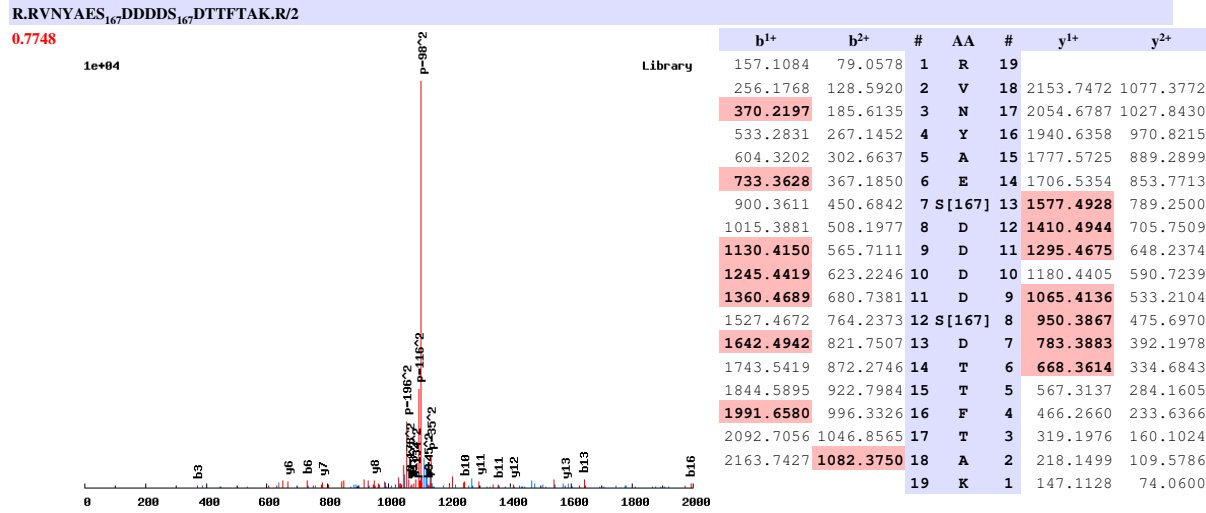



# Annotated spectra from Saleem et. al. 2009

R.R<sub>166</sub>VT<sub>181</sub>PR<sub>166</sub>PS<sub>167</sub>LEADR<sub>166</sub>-A/2

0.7975

1e+04

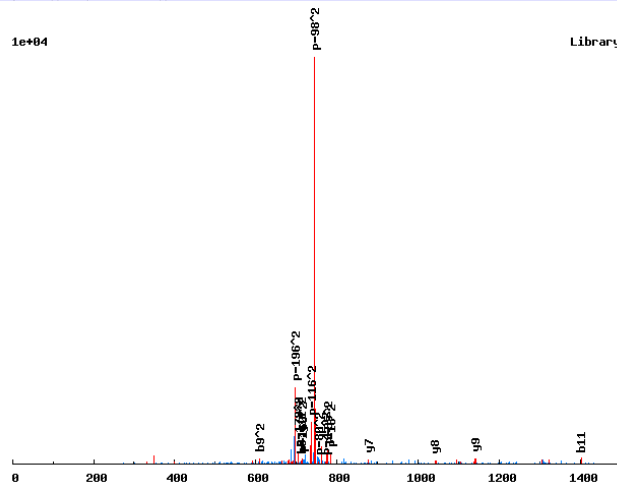

| Library | b <sup>1+</sup> | b <sup>2+</sup> | #  | AA     | #  | y <sup>1+</sup> | y <sup>2+</sup> |
|---------|-----------------|-----------------|----|--------|----|-----------------|-----------------|
|         | 167.1167        | 84.0620         | 1  | R[166] | 12 |                 |                 |
|         | 266.1851        | 133.5962        | 2  | V      | 11 | 1420.6136       | 710.8104        |
|         | 447.1991        | 224.1032        | 3  | T[181] | 10 | 1321.5452       | 661.2762        |
|         | 544.2518        | 272.6296        | 4  | P      | 9  | 1140.5312       | 570.7692        |
|         | 710.3612        | 355.6842        | 5  | R[166] | 8  | 1043.4784       | 522.2428        |
|         | 807.4140        | 404.2106        | 6  | P      | 7  | 877.3690        | 439.1882        |
|         | 974.4123        | 487.7098        | 7  | S[167] | 6  | 780.3163        | 390.6618        |
|         | 1087.4964       | 544.2518        | 8  | L      | 5  | 613.3179        | 307.1626        |
|         | 1216.5390       | 608.7731        | 9  | E      | 4  | 500.2339        | 250.6206        |
|         | 1287.5761       | 644.2917        | 10 | A      | 3  | 371.1913        | 186.0993        |
|         | 1402.6030       | 701.8052        | 11 | D      | 2  | 300.1542        | 150.5807        |
|         |                 |                 | 12 | R[166] | 1  | 185.1272        | 93.0672         |

# Annotated spectra from Saleem et. al. 2009

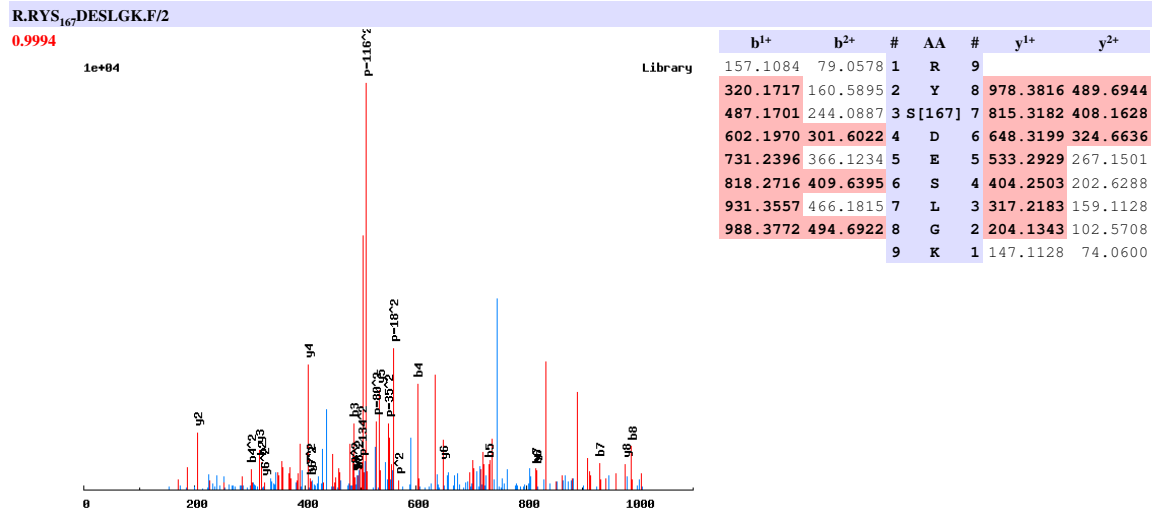

# Annotated spectra from Saleem et. al. 2009

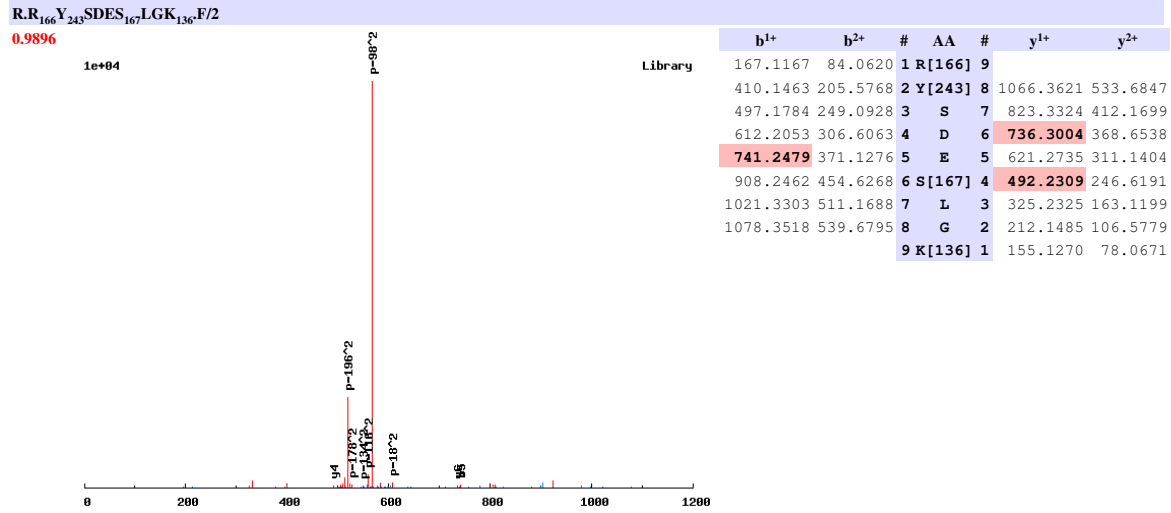

# Annotated spectra from Saleem et. al. 2009

K.RYSS<sub>167</sub>NDFEK.E/2

0.947

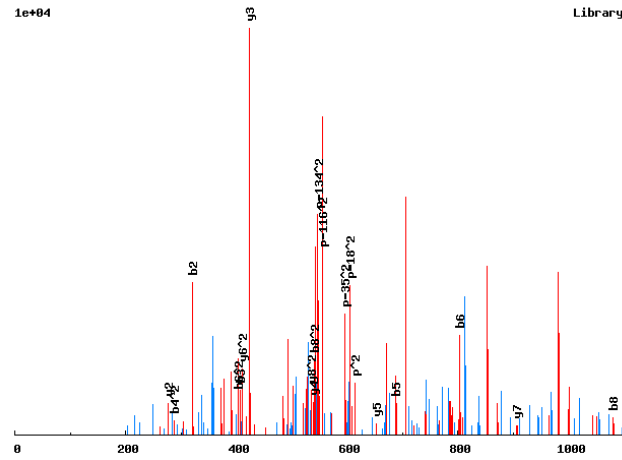

| Library | b <sup>1+</sup> | b <sup>2+</sup> | # | AA     | # | y <sup>1+</sup> | y <sup>2+</sup> |
|---------|-----------------|-----------------|---|--------|---|-----------------|-----------------|
|         | 157.1084        | 79.0578         | 1 | R      | 9 |                 |                 |
|         | 320.1717        | 160.5895        | 2 | Y      | 8 | 1069.3874       | 535.1973        |
|         | 407.2038        | 204.1055        | 3 | S      | 7 | 906.3241        | 453.6657        |
|         | 574.2021        | 287.6047        | 4 | S[167] | 6 | 819.2920        | 410.1497        |
|         | 688.2450        | 344.6262        | 5 | N      | 5 | 652.2937        | 326.6505        |
|         | 803.2720        | 402.1396        | 6 | D      | 4 | 538.2507        | 269.6290        |
|         | 950.3404        | 475.6738        | 7 | F      | 3 | 423.2238        | 212.1155        |
|         | 1079.3830       | 540.1951        | 8 | E      | 2 | 276.1554        | 138.5813        |
|         |                 |                 | 9 | K      | 1 | 147.1128        | 74.0600         |



# Annotated spectra from Saleem et. al. 2009

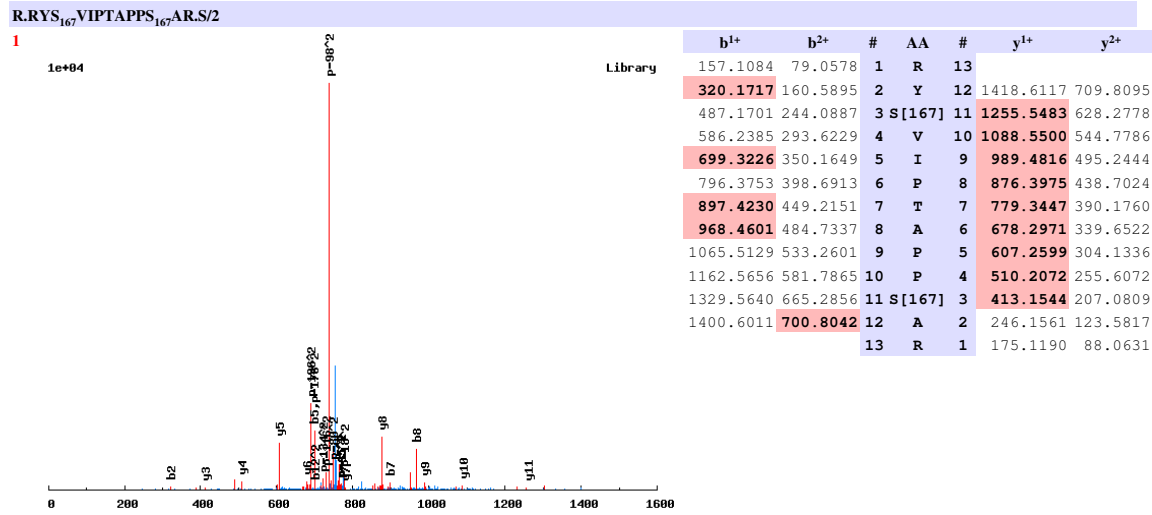

# Annotated spectra from Saleem et. al. 2009

R.RYS<sub>167</sub>VIPT<sub>181</sub>APPS<sub>167</sub>AR.S/2

0.9987

1e+04

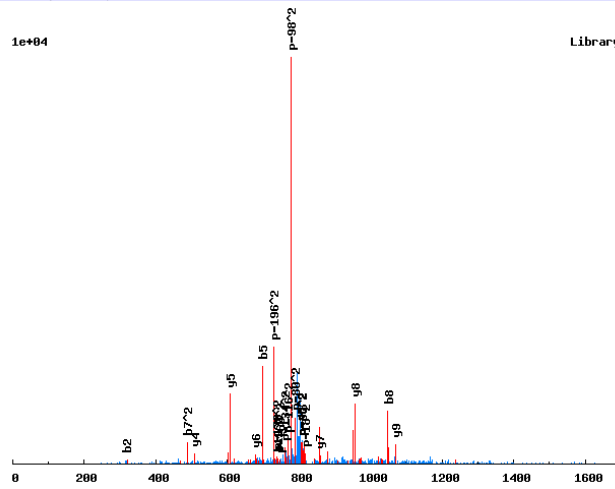

| Library | b <sup>1+</sup>  | b <sup>2+</sup> | #  | AA     | #  | y <sup>1+</sup>  | y <sup>2+</sup> |
|---------|------------------|-----------------|----|--------|----|------------------|-----------------|
|         | 157.1084         | 79.0578         | 1  | R      | 13 |                  |                 |
|         | <b>320.1717</b>  | 160.5895        | 2  | Y      | 12 | 1498.5780        | 749.7926        |
|         | 487.1701         | 244.0887        | 3  | S[167] | 11 | 1335.5147        | 668.2610        |
|         | 586.2385         | 293.6229        | 4  | V      | 10 | 1168.5163        | 584.7618        |
|         | <b>699.3226</b>  | 350.1649        | 5  | I      | 9  | <b>1069.4479</b> | 535.2276        |
|         | 796.3753         | 398.6913        | 6  | P      | 8  | <b>956.3638</b>  | 478.6856        |
|         | 977.3893         | <b>489.1983</b> | 7  | T[181] | 7  | <b>859.3111</b>  | 430.1592        |
|         | <b>1048.4264</b> | 524.7169        | 8  | A      | 6  | <b>678.2971</b>  | 339.6522        |
|         | 1145.4792        | 573.2432        | 9  | P      | 5  | <b>607.2599</b>  | 304.1336        |
|         | 1242.5320        | 621.7696        | 10 | P      | 4  | <b>510.2072</b>  | 255.6072        |
|         | 1409.5303        | 705.2688        | 11 | S[167] | 3  | 413.1544         | 207.0809        |
|         | 1480.5674        | <b>740.7874</b> | 12 | A      | 2  | 246.1561         | 123.5817        |
|         |                  |                 | 13 | R      | 1  | 175.1190         | 88.0631         |

# Annotated spectra from Saleem et. al. 2009

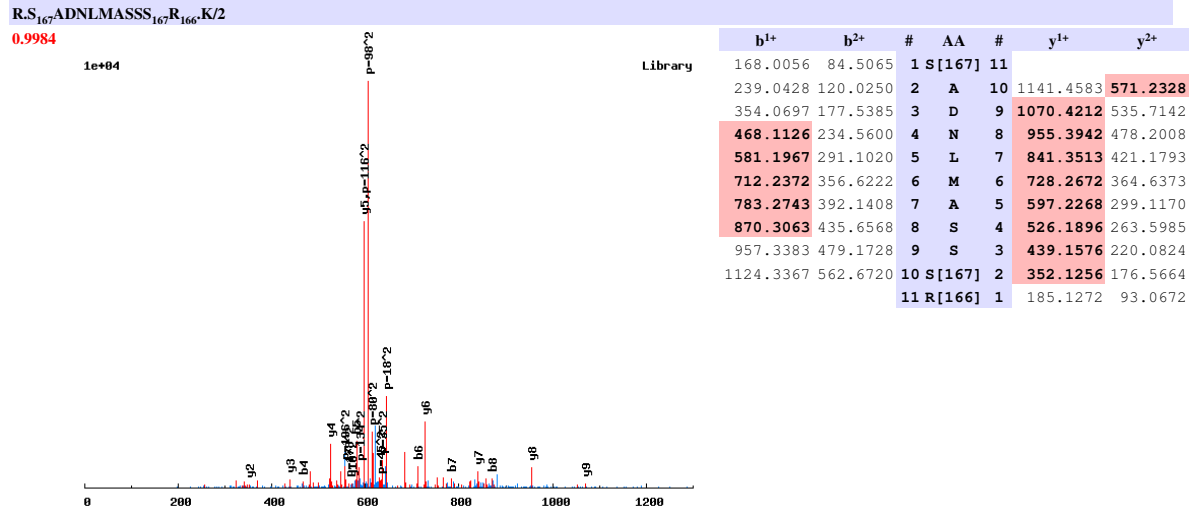

# Annotated spectra from Saleem et. al. 2009

K.SAEHS<sub>167</sub>-K<sub>136</sub>EIS<sub>167</sub>VSQK<sub>136</sub>A/2

0.5895

1e+04

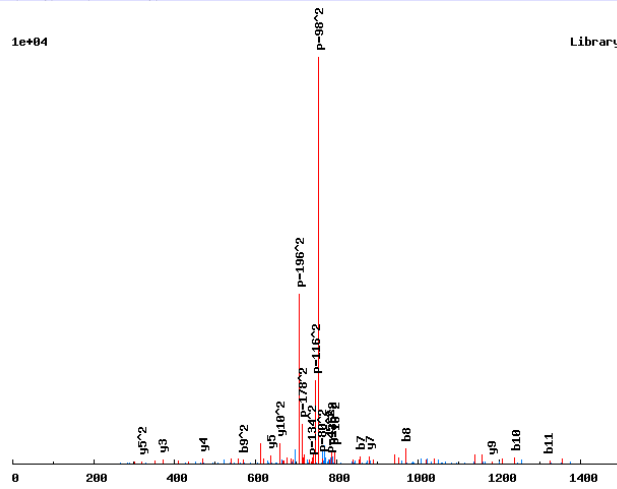

| Library | b <sup>1+</sup> | b <sup>2+</sup> | #  | AA     | #  | y <sup>1+</sup> | y <sup>2+</sup> |
|---------|-----------------|-----------------|----|--------|----|-----------------|-----------------|
|         | 88.0393         | 44.5233         | 1  | S      | 13 |                 |                 |
|         | 159.0764        | 80.0419         | 2  | A      | 12 | 1518.6572       | 759.8322        |
|         | 288.1190        | 144.5631        | 3  | E      | 11 | 1447.6200       | 724.3137        |
|         | 425.1779        | 213.0926        | 4  | H      | 10 | 1318.5775       | 659.7924        |
|         | 592.1763        | 296.5918        | 5  | S[167] | 9  | 1181.5185       | 591.2629        |
|         | 728.2854        | 364.6464        | 6  | K[136] | 8  | 1014.5202       | 507.7637        |
|         | 857.3280        | 429.1677        | 7  | E      | 7  | 878.4110        | 439.7092        |
|         | 970.4121        | 485.7097        | 8  | I      | 6  | 749.3684        | 375.1879        |
|         | 1137.4105       | 569.2089        | 9  | S[167] | 5  | 636.2844        | 318.6458        |
|         | 1236.4789       | 618.7431        | 10 | V      | 4  | 469.2860        | 235.1466        |
|         | 1323.5109       | 662.2591        | 11 | S      | 3  | 370.2176        | 185.6124        |
|         | 1451.5695       | 726.2884        | 12 | Q      | 2  | 283.1856        | 142.0964        |
|         |                 |                 | 13 | K[136] | 1  | 155.1270        | 78.0671         |

# Annotated spectra from Saleem et. al. 2009

K.SAHS<sub>167</sub>K<sub>136</sub>DS<sub>167</sub>LLPSR<sub>166</sub>S/3

0.8556

1e+04

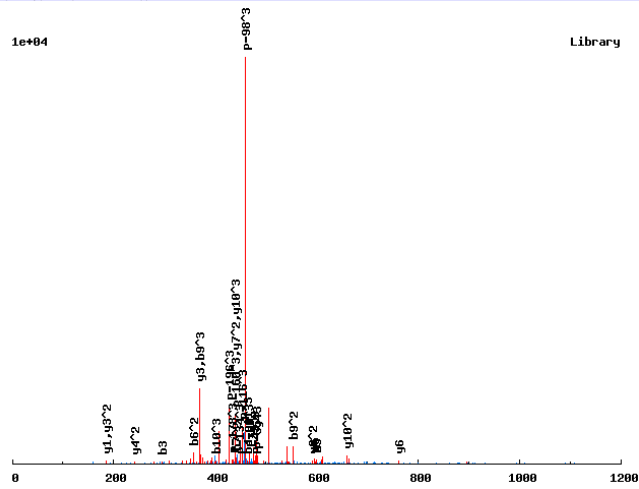

| Library | b <sup>1+</sup> | b <sup>2+</sup> | b <sup>3+</sup> | #  | AA     | #  | y <sup>1+</sup> | y <sup>2+</sup> | y <sup>3+</sup> |
|---------|-----------------|-----------------|-----------------|----|--------|----|-----------------|-----------------|-----------------|
|         | 88.0393         | 44.5233         | 30.0180         | 1  | S      | 12 |                 |                 |                 |
|         | 159.0764        | 80.0419         | 53.6970         | 2  | A      | 11 | 1388.6090       | 694.8081        | 463.5412        |
|         | 296.1353        | 148.5713        | 99.3833         | 3  | H      | 10 | 1317.5719       | 659.2896        | 439.8621        |
|         | 463.1337        | 232.0705        | 155.0494        | 4  | S[167] | 9  | 1180.5130       | 590.7601        | 394.1758        |
|         | 599.2429        | 300.1251        | 200.4191        | 5  | K[136] | 8  | 1013.5146       | 507.2609        | 338.5097        |
|         | 714.2698        | 357.6385        | 238.7615        | 6  | D      | 7  | 877.4054        | 439.2064        | 293.1400        |
|         | 881.2682        | 441.1377        | 294.4276        | 7  | S[167] | 6  | 762.3785        | 381.6929        | 254.7977        |
|         | 994.3522        | 497.6797        | 332.1223        | 8  | L      | 5  | 595.3801        | 298.1937        | 199.1316        |
|         | 1107.4363       | 554.2218        | 369.8169        | 9  | L      | 4  | 482.2961        | 241.6517        | 161.4369        |
|         | 1204.4890       | 602.7482        | 402.1679        | 10 | P      | 3  | 369.2120        | 185.1096        | 123.7422        |
|         | 1291.5211       | 646.2642        | 431.1785        | 11 | S      | 2  | 272.1592        | 136.5833        | 91.3913         |
|         |                 |                 |                 | 12 | R[166] | 1  | 185.1272        | 93.0672         | 62.3806         |

# Annotated spectra from Saleem et. al. 2009

R.S<sub>167</sub>AKS<sub>167</sub>FNDLQHTLSLSK.Q/3

0.8915

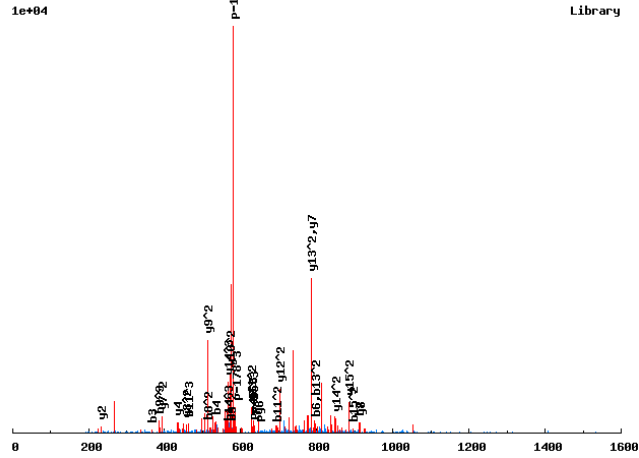

| Library | b <sup>1+</sup> | b <sup>2+</sup> | b <sup>3+</sup> | #  | AA     | #  | y <sup>1+</sup> | y <sup>2+</sup> | y <sup>3+</sup> |
|---------|-----------------|-----------------|-----------------|----|--------|----|-----------------|-----------------|-----------------|
|         | 168.0056        | 84.5065         | 56.6734         | 1  | S[167] | 16 |                 |                 |                 |
|         | 239.0428        | 120.0250        | 80.3524         | 2  | A      | 15 | 1768.8629       | 884.9351        | 590.2925        |
|         | 367.1377        | 184.0725        | 123.0508        | 3  | K      | 14 | 1697.8258       | 849.4165        | 566.6135        |
|         | 534.1361        | 267.5717        | 178.7169        | 4  | S[167] | 13 | 1569.7309       | 785.3691        | 523.9151        |
|         | 681.2045        | 341.1059        | 227.7397        | 5  | F      | 12 | 1402.7325       | 701.8699        | 468.2490        |
|         | 795.2474        | 398.1273        | 265.7540        | 6  | N      | 11 | 1255.6641       | 628.3357        | 419.2262        |
|         | 910.2744        | 455.6408        | 304.0963        | 7  | D      | 10 | 1141.6211       | 571.3142        | 381.2119        |
|         | 1023.3584       | 512.1828        | 341.7910        | 8  | L      | 9  | 1026.5942       | 513.8007        | 342.8696        |
|         | 1151.4170       | 576.2121        | 384.4772        | 9  | Q      | 8  | 913.5102        | 457.2587        | 305.1749        |
|         | 1288.4759       | 644.7416        | 430.1635        | 10 | H      | 7  | 785.4516        | 393.2294        | 262.4887        |
|         | 1389.5236       | 695.2654        | 463.8460        | 11 | T      | 6  | 648.3927        | 324.7000        | 216.8024        |
|         | 1502.6076       | 751.8075        | 501.5407        | 12 | L      | 5  | 547.3450        | 274.1761        | 183.1198        |
|         | 1589.6397       | 795.3235        | 530.5514        | 13 | S      | 4  | 434.2609        | 217.6341        | 145.4252        |
|         | 1702.7237       | 851.8655        | 568.2461        | 14 | L      | 3  | 347.2289        | 174.1181        | 116.4145        |
|         | 1789.7558       | 895.3815        | 597.2568        | 15 | S      | 2  | 234.1448        | 117.5761        | 78.7198         |
|         |                 |                 |                 | 16 | K      | 1  | 147.1128        | 74.0600         | 49.7091         |

# Annotated spectra from Saleem et. al. 2009

K.SALDVGES<sub>167</sub>DSS<sub>167</sub>DIEVDHTK.S/3

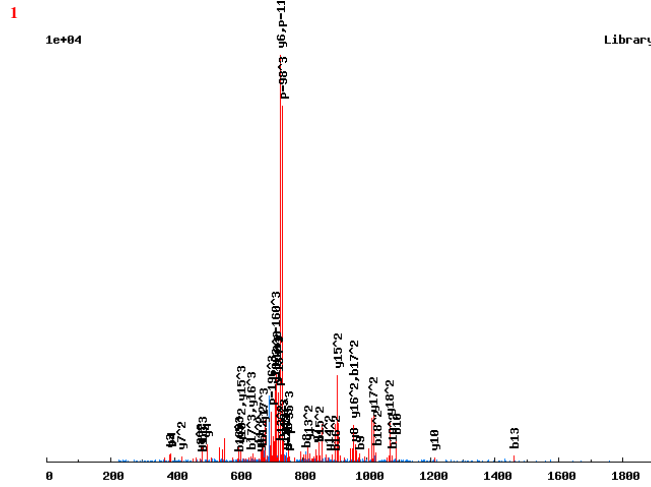

| Library | b <sup>1+</sup> | b <sup>2+</sup> | b <sup>3+</sup> | #  | AA     | #  | y <sup>1+</sup> | y <sup>2+</sup> | y <sup>3+</sup> |
|---------|-----------------|-----------------|-----------------|----|--------|----|-----------------|-----------------|-----------------|
|         | 88.0393         | 44.5233         | 30.0180         | 1  | S      | 20 |                 |                 |                 |
|         | 159.0764        | 80.0419         | 53.6970         | 2  | A      | 19 | 2213.8635       | 1107.4354       | 738.6260        |
|         | 272.1605        | 136.5839        | 91.3917         | 3  | L      | 18 | 2142.8264       | 1071.9168       | 714.9470        |
|         | 387.1874        | 194.0973        | 129.7340        | 4  | D      | 17 | 2029.7423       | 1015.3748       | 677.2523        |
|         | 486.2558        | 243.6316        | 162.7568        | 5  | V      | 16 | 1914.7154       | 957.8613        | 638.9100        |
|         | 543.2773        | 272.1423        | 181.7640        | 6  | G      | 15 | 1815.6470       | 908.3271        | 605.8872        |
|         | 672.3199        | 336.6636        | 224.7781        | 7  | E      | 14 | 1758.6255       | 879.8164        | 586.8800        |
|         | 809.3788        | 405.1930        | 270.4644        | 8  | H      | 13 | 1629.5829       | 815.2951        | 543.8658        |
|         | 976.3772        | 488.6922        | 326.1306        | 9  | S[167] | 12 | 1492.5240       | 746.7657        | 498.1795        |
|         | 1091.4041       | 546.2057        | 364.4729        | 10 | D      | 11 | 1325.5257       | 663.2665        | 442.5134        |
|         | 1178.4361       | 589.7217        | 393.4836        | 11 | S      | 10 | 1210.4987       | 605.7530        | 404.1711        |
|         | 1345.4345       | 673.2209        | 449.1497        | 12 | S[167] | 9  | 1123.4667       | 562.2370        | 375.1604        |
|         | 1460.4614       | 730.7344        | 487.4920        | 13 | D      | 8  | 956.4683        | 478.7378        | 319.4943        |
|         | 1573.5455       | 787.2764        | 525.1867        | 14 | I      | 7  | 841.4414        | 421.2243        | 281.1520        |
|         | 1702.5881       | 851.7977        | 568.2009        | 15 | E      | 6  | 728.3573        | 364.6823        | 243.4573        |
|         | 1801.6565       | 901.3319        | 601.2237        | 16 | V      | 5  | 599.3147        | 300.1610        | 200.4431        |
|         | 1916.6834       | 958.8454        | 639.5660        | 17 | D      | 4  | 500.2463        | 250.6268        | 167.4203        |
|         | 2053.7423       | 1027.3748       | 685.2523        | 18 | H      | 3  | 385.2194        | 193.1133        | 129.0780        |
|         | 2154.7900       | 1077.8986       | 718.9349        | 19 | T      | 2  | 248.1605        | 124.5839        | 83.3917         |
|         |                 |                 |                 | 20 | K      | 1  | 147.1128        | 74.0600         | 49.7091         |

# Annotated spectra from Saleem et. al. 2009

K.S<sub>167</sub>ANEFTT<sub>181</sub>PEDK.H/2

0.9999

1e+04

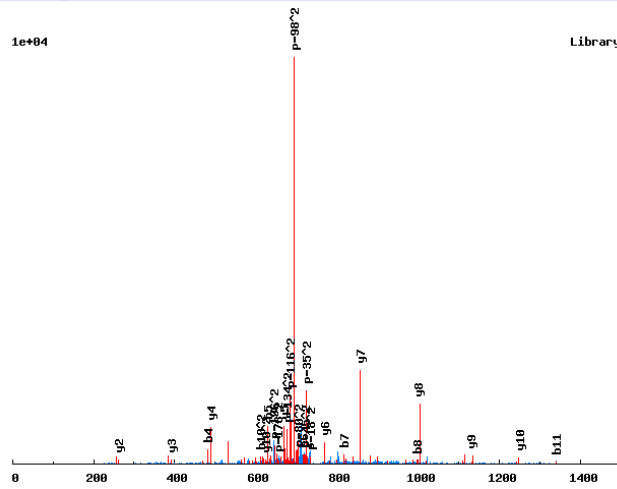

| Library | b <sup>1+</sup> | b <sup>2+</sup> | #  | AA | #     | y <sup>1+</sup> | y <sup>2+</sup> |          |
|---------|-----------------|-----------------|----|----|-------|-----------------|-----------------|----------|
|         | 168.0056        | 84.5065         | 1  | S  | [167] | 12              |                 |          |
|         | 239.0428        | 120.0250        | 2  | A  | 11    | 1318.5199       | 659.7636        |          |
|         | 353.0857        | 177.0465        | 3  | N  | 10    | 1247.4827       | 624.2450        |          |
|         | 482.1283        | 241.5678        | 4  | E  | 9     | 1133.4398       | 567.2235        |          |
|         | 629.1967        | 315.1020        | 5  | F  | 8     | 1004.3972       | 502.7023        |          |
|         | 716.2287        | 358.6180        | 6  | S  | 7     | 857.3288        | 429.1680        |          |
|         | 817.2764        | 409.1418        | 7  | T  | 6     | 770.2968        | 385.6520        |          |
|         | 998.2904        | 499.6488        | 8  | T  | [181] | 5               | 669.2491        | 335.1282 |
|         | 1095.3432       | 548.1752        | 9  | P  | 4     | 488.2351        | 244.6212        |          |
|         | 1224.3858       | 612.6965        | 10 | E  | 3     | 391.1823        | 196.0948        |          |
|         | 1339.4127       | 670.2100        | 11 | D  | 2     | 262.1397        | 131.5735        |          |
|         |                 |                 | 12 | K  | 1     | 147.1128        | 74.0600         |          |



# Annotated spectra from Saleem et. al. 2009

R.SAS<sub>167</sub>ATGILGLR.R/2

0.9998

1e+04

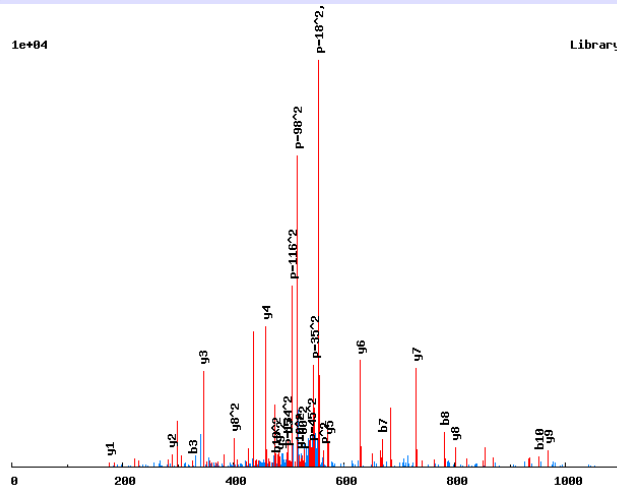

| Library | b <sup>1+</sup> | b <sup>2+</sup> | #  | AA      | #  | y <sup>1+</sup> | y <sup>2+</sup> |
|---------|-----------------|-----------------|----|---------|----|-----------------|-----------------|
|         | 88.0393         | 44.5233         | 1  | S       | 11 |                 |                 |
|         | 159.0764        | 80.0419         | 2  | A       | 10 | 1038.5343       | 519.7708        |
|         | 326.0748        | 163.5410        | 3  | S [167] | 9  | 967.4972        | 484.2522        |
|         | 397.1119        | 199.0596        | 4  | A       | 8  | 800.4988        | 400.7531        |
|         | 498.1596        | 249.5834        | 5  | T       | 7  | 729.4617        | 365.2345        |
|         | 555.1810        | 278.0942        | 6  | G       | 6  | 628.4140        | 314.7107        |
|         | 668.2651        | 334.6362        | 7  | I       | 5  | 571.3926        | 286.1999        |
|         | 781.3492        | 391.1782        | 8  | L       | 4  | 458.3085        | 229.6579        |
|         | 838.3706        | 419.6889        | 9  | G       | 3  | 345.2245        | 173.1159        |
|         | 951.4547        | 476.2310        | 10 | L       | 2  | 288.2030        | 144.6051        |
|         |                 |                 | 11 | R       | 1  | 175.1190        | 88.0631         |

# Annotated spectra from Saleem et. al. 2009

R.S<sub>167</sub>ASFHS<sub>167</sub>PVHTLLS<sub>167</sub>PK<sub>136</sub>N/2

0.9987

1e+04

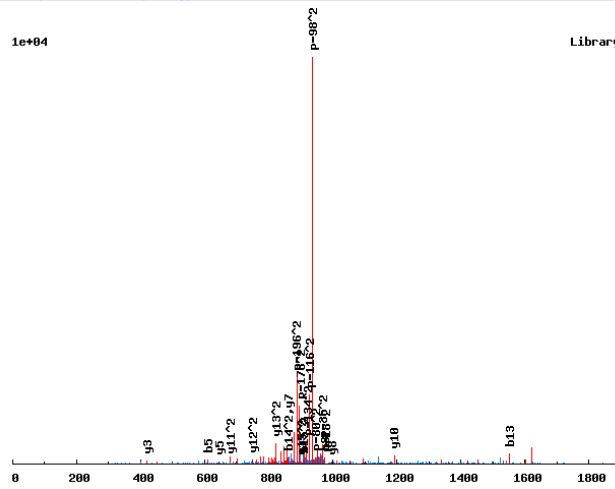

| Library | b <sup>1+</sup> | b <sup>2+</sup> | #  | AA     | #  | y <sup>1+</sup> | y <sup>2+</sup> |
|---------|-----------------|-----------------|----|--------|----|-----------------|-----------------|
|         | 168.0056        | 84.5065         | 1  | S[167] | 16 |                 |                 |
|         | 239.0428        | 120.0250        | 2  | A      | 15 | 1802.8118       | 901.9095        |
|         | 326.0748        | 163.5410        | 3  | S      | 14 | 1731.7746       | 866.3910        |
|         | 473.1432        | 237.0752        | 4  | F      | 13 | 1644.7426       | 822.8749        |
|         | 610.2021        | 305.6047        | 5  | H      | 12 | 1497.6742       | 749.3407        |
|         | 777.2005        | 389.1039        | 6  | S[167] | 11 | 1360.6153       | 680.8113        |
|         | 874.2532        | 437.6303        | 7  | P      | 10 | 1193.6169       | 597.3121        |
|         | 973.3216        | 487.1645        | 8  | V      | 9  | 1096.5642       | 548.7857        |
|         | 1110.3805       | 555.6939        | 9  | H      | 8  | 997.4958        | 499.2515        |
|         | 1224.4235       | 612.7154        | 10 | N      | 7  | 860.4369        | 430.7221        |
|         | 1325.4712       | 663.2392        | 11 | T      | 6  | 746.3939        | 373.7006        |
|         | 1438.5552       | 719.7812        | 12 | L      | 5  | 645.3462        | 323.1768        |
|         | 1551.6393       | 776.3233        | 13 | L      | 4  | 532.2622        | 266.6347        |
|         | 1718.6376       | 859.8225        | 14 | S[167] | 3  | 419.1781        | 210.0927        |
|         | 1815.6904       | 908.3488        | 15 | P      | 2  | 252.1798        | 126.5935        |
|         |                 |                 | 16 | K[136] | 1  | 155.1270        | 78.0671         |

# Annotated spectra from Saleem et. al. 2009

R.SASFHS<sub>167</sub>PVHNTLLS<sub>167</sub>PK<sub>136</sub>N/3

0.9992

1e+04

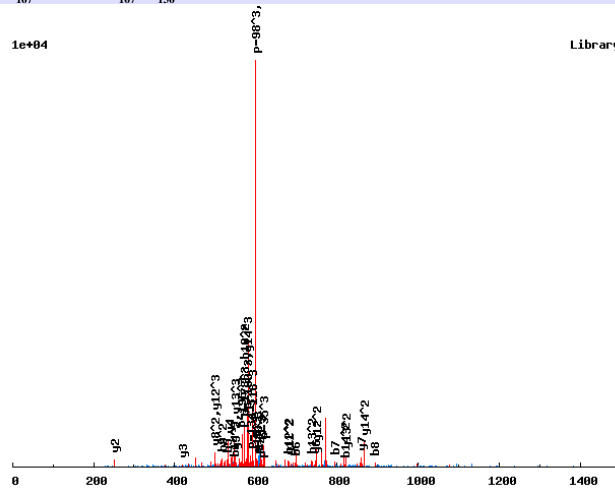

| Library | b <sup>1+</sup> | b <sup>2+</sup> | b <sup>3+</sup> | #  | AA     | #  | y <sup>1+</sup> | y <sup>2+</sup> | y <sup>3+</sup> |
|---------|-----------------|-----------------|-----------------|----|--------|----|-----------------|-----------------|-----------------|
|         | 88.0393         | 44.5233         | 30.0180         | 1  | S      | 16 |                 |                 |                 |
|         | 159.0764        | 80.0419         | 53.6970         | 2  | A      | 15 | 1802.8118       | 901.9095        | 601.6088        |
|         | 246.1085        | 123.5579        | 82.7077         | 3  | S      | 14 | 1731.7746       | 866.3910        | 577.9297        |
|         | 393.1769        | 197.0921        | 131.7305        | 4  | F      | 13 | 1644.7426       | 822.8749        | 548.9191        |
|         | 530.2358        | 265.6215        | 177.4168        | 5  | H      | 12 | 1497.6742       | 749.3407        | 499.8963        |
|         | 697.2341        | 349.1207        | 233.0829        | 6  | S[167] | 11 | 1360.6153       | 680.8113        | 454.2100        |
|         | 794.2869        | 397.6471        | 265.4338        | 7  | P      | 10 | 1193.6169       | 597.3121        | 398.5438        |
|         | 893.3553        | 447.1813        | 298.4566        | 8  | V      | 9  | 1096.5642       | 548.7857        | 366.1929        |
|         | 1030.4142       | 515.7107        | 344.1429        | 9  | H      | 8  | 997.4958        | 499.2515        | 333.1701        |
|         | 1144.4571       | 572.7322        | 382.1572        | 10 | N      | 7  | 860.4369        | 430.7221        | 287.4838        |
|         | 1245.5048       | 623.2561        | 415.8398        | 11 | T      | 6  | 746.3939        | 373.7006        | 249.4695        |
|         | 1358.5889       | 679.7981        | 453.5345        | 12 | L      | 5  | 645.3462        | 323.1768        | 215.7869        |
|         | 1471.6729       | 736.3401        | 491.2292        | 13 | L      | 4  | 532.2622        | 266.6347        | 178.0922        |
|         | 1638.6713       | 819.8393        | 546.8953        | 14 | S[167] | 3  | 419.1781        | 210.0927        | 140.3976        |
|         | 1735.7241       | 868.3657        | 579.2462        | 15 | P      | 2  | 252.1798        | 126.5935        | 84.7314         |
|         |                 |                 |                 | 16 | K[136] | 1  | 155.1270        | 78.0671         | 52.3805         |

# Annotated spectra from Saleem et. al. 2009

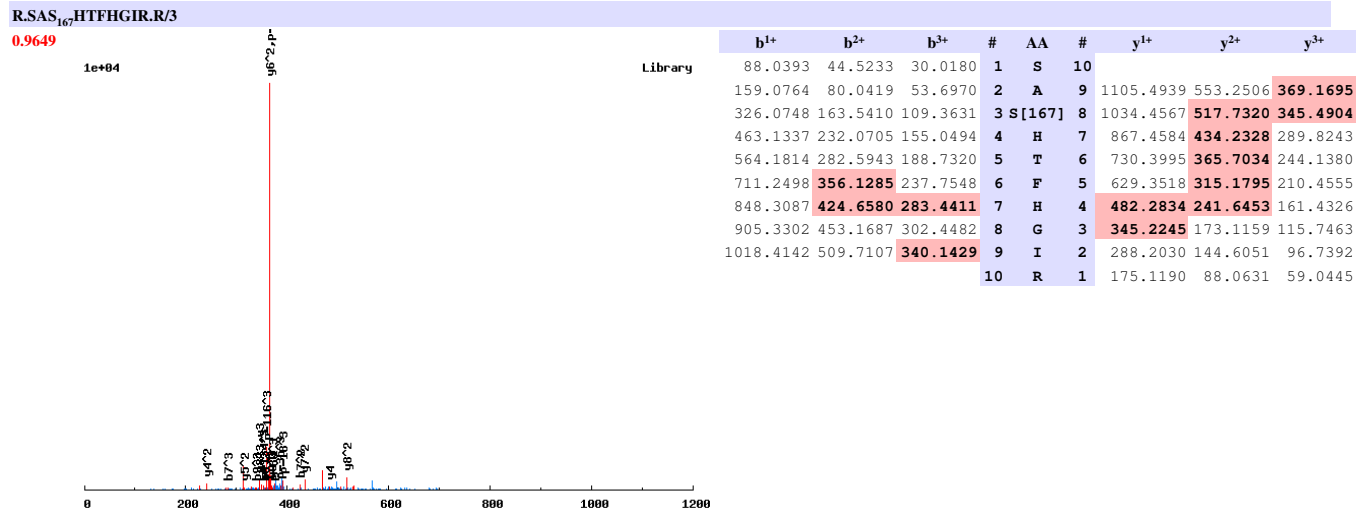

# Annotated spectra from Saleem et. al. 2009

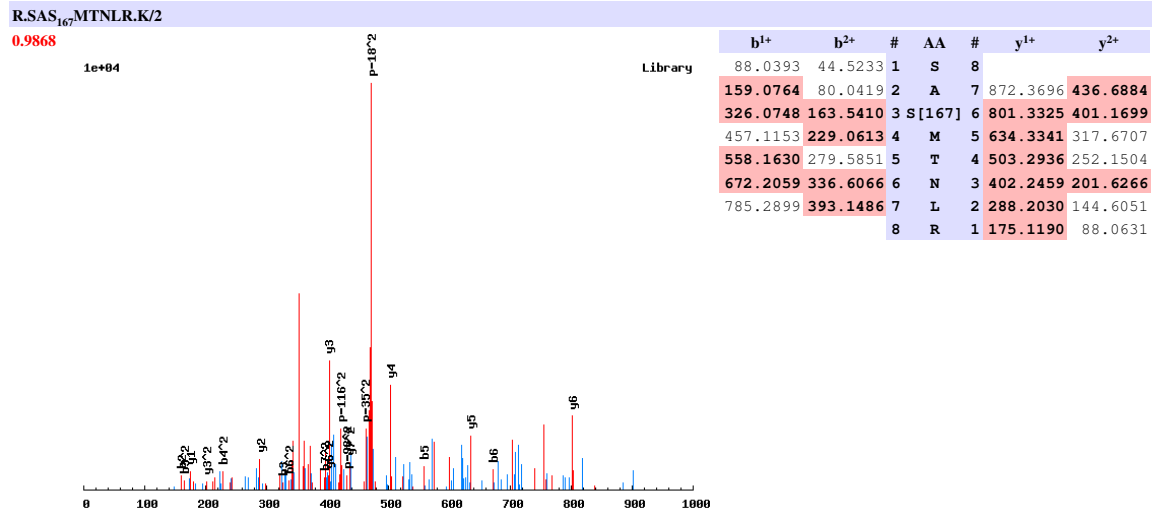

Annotated spectra from Saleem et. al. 2009

R.S<sub>167</sub>ASPINTNNASGDS<sub>167</sub>PDTK.K/2

0.9836

1e+04

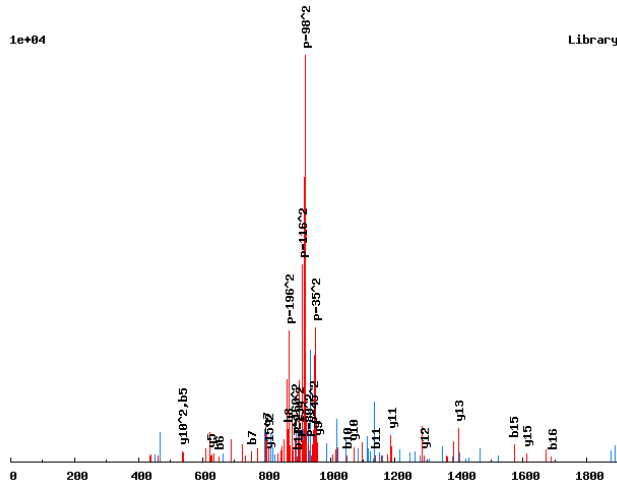

| Library | b <sup>1+</sup> | b <sup>2+</sup> | #  | AA | #     | y <sup>1+</sup> | y <sup>2+</sup> |          |
|---------|-----------------|-----------------|----|----|-------|-----------------|-----------------|----------|
|         | 168.0056        | 84.5065         | 1  | S  | [167] | 18              |                 |          |
|         | 239.0428        | 120.0250        | 2  | A  | 17    | 1768.7385       | 884.8729        |          |
|         | 326.0748        | 163.5410        | 3  | S  | 16    | 1697.7014       | 849.3543        |          |
|         | 423.1275        | 212.0674        | 4  | P  | 15    | 1610.6694       | 805.8383        |          |
|         | 536.2116        | 268.6094        | 5  | I  | 14    | 1513.6166       | 757.3119        |          |
|         | 650.2545        | 325.6309        | 6  | N  | 13    | 1400.5326       | 700.7699        |          |
|         | 751.3022        | 376.1547        | 7  | T  | 12    | 1286.4896       | 643.7485        |          |
|         | 865.3451        | 433.1762        | 8  | N  | 11    | 1185.4419       | 593.2246        |          |
|         | 979.3881        | 490.1977        | 9  | N  | 10    | 1071.3990       | 536.2031        |          |
|         | 1050.4252       | 525.7162        | 10 | A  | 9     | 957.3561        | 479.1817        |          |
|         | 1137.4572       | 569.2322        | 11 | S  | 8     | 886.3190        | 443.6631        |          |
|         | 1194.4787       | 597.7430        | 12 | G  | 7     | 799.2869        | 400.1471        |          |
|         | 1309.5056       | 655.2564        | 13 | D  | 6     | 742.2655        | 371.6364        |          |
|         | 1476.5040       | 738.7556        | 14 | S  | [167] | 5               | 627.2385        | 314.1229 |
|         | 1573.5567       | 787.2820        | 15 | P  | 4     | 460.2402        | 230.6237        |          |
|         | 1688.5837       | 844.7955        | 16 | D  | 3     | 363.1874        | 182.0973        |          |
|         | 1789.6314       | 895.3193        | 17 | T  | 2     | 248.1605        | 124.5839        |          |
|         |                 |                 | 18 | K  | 1     | 147.1128        | 74.0600         |          |

# Annotated spectra from Saleem et. al. 2009

K.S<sub>167</sub>ASPPAS<sub>167</sub>PSYPSIFR<sub>166</sub>R/2

0.9987

1e+04

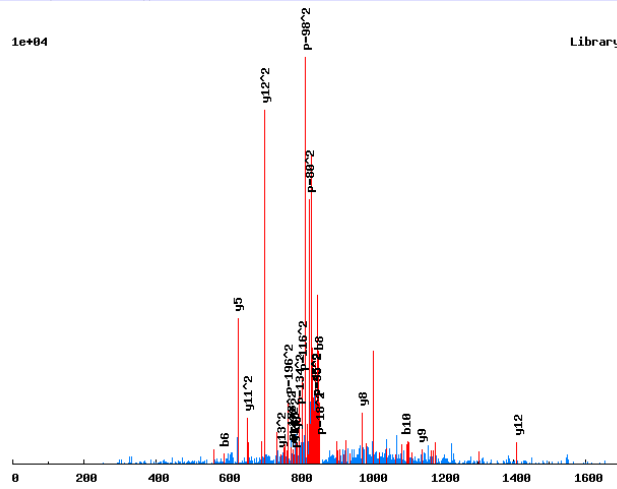

| Library | b <sup>1+</sup> | b <sup>2+</sup> | #  | AA     | #  | y <sup>1+</sup> | y <sup>2+</sup> |
|---------|-----------------|-----------------|----|--------|----|-----------------|-----------------|
|         | 168.0056        | 84.5065         | 1  | S[167] | 15 |                 |                 |
|         | 239.0428        | 120.0250        | 2  | A      | 14 | 1566.7227       | 783.8650        |
|         | 326.0748        | 163.5410        | 3  | S      | 13 | 1495.6856       | 748.3465        |
|         | 423.1275        | 212.0674        | 4  | P      | 12 | 1408.6536       | 704.8304        |
|         | 520.1803        | 260.5938        | 5  | P      | 11 | 1311.6008       | 656.3041        |
|         | 591.2174        | 296.1123        | 6  | A      | 10 | 1214.5481       | 607.7777        |
|         | 758.2158        | 379.6115        | 7  | S[167] | 9  | 1143.5110       | 572.2591        |
|         | 855.2685        | 428.1379        | 8  | P      | 8  | 976.5126        | 488.7599        |
|         | 942.3006        | 471.6539        | 9  | S      | 7  | 879.4598        | 440.2336        |
|         | 1105.3639       | 553.1856        | 10 | Y      | 6  | 792.4278        | 396.7175        |
|         | 1202.4167       | 601.7120        | 11 | P      | 5  | 629.3645        | 315.1859        |
|         | 1289.4487       | 645.2280        | 12 | S      | 4  | 532.3117        | 266.6595        |
|         | 1402.5327       | 701.7700        | 13 | I      | 3  | 445.2797        | 223.1435        |
|         | 1549.6012       | 775.3042        | 14 | F      | 2  | 332.1956        | 166.6015        |
|         |                 |                 | 15 | R[166] | 1  | 185.1272        | 93.0672         |

Annotated spectra from Saleem et. al. 2009

K.SASS<sub>167</sub>SST<sub>181</sub>INHVLK.E/2

0.9736

1e+04

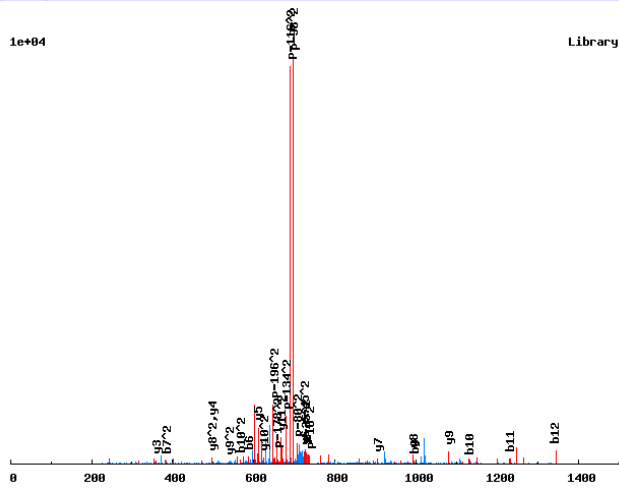

Library

|  | b <sup>1+</sup> | b <sup>2+</sup> | #  | AA     | #  | y <sup>1+</sup> | y <sup>2+</sup> |
|--|-----------------|-----------------|----|--------|----|-----------------|-----------------|
|  | 88.0393         | 44.5233         | 1  | S      | 13 |                 |                 |
|  | 159.0764        | 80.0419         | 2  | A      | 12 | 1403.5967       | 702.3020        |
|  | 246.1085        | 123.5579        | 3  | S      | 11 | 1332.5596       | 666.7835        |
|  | 413.1068        | 207.0570        | 4  | S[167] | 10 | 1245.5276       | 623.2674        |
|  | 500.1388        | 250.5731        | 5  | S      | 9  | 1078.5292       | 539.7683        |
|  | 587.1709        | 294.0891        | 6  | S      | 8  | 991.4972        | 496.2522        |
|  | 768.1849        | 384.5961        | 7  | T[181] | 7  | 904.4652        | 452.7362        |
|  | 881.2689        | 441.1381        | 8  | I      | 6  | 723.4512        | 362.2292        |
|  | 995.3119        | 498.1596        | 9  | N      | 5  | 610.3671        | 305.6872        |
|  | 1132.3708       | 566.6890        | 10 | H      | 4  | 496.3242        | 248.6657        |
|  | 1231.4392       | 616.2232        | 11 | V      | 3  | 359.2653        | 180.1363        |
|  | 1344.5233       | 672.7653        | 12 | L      | 2  | 260.1969        | 130.6021        |
|  |                 |                 | 13 | K      | 1  | 147.1128        | 74.0600         |



# Annotated spectra from Saleem et. al. 2009

R.S<sub>167</sub>AS<sub>167</sub>VGSNQSEQDK<sub>136</sub>GSSQSPK<sub>136</sub>H/2

0.8617

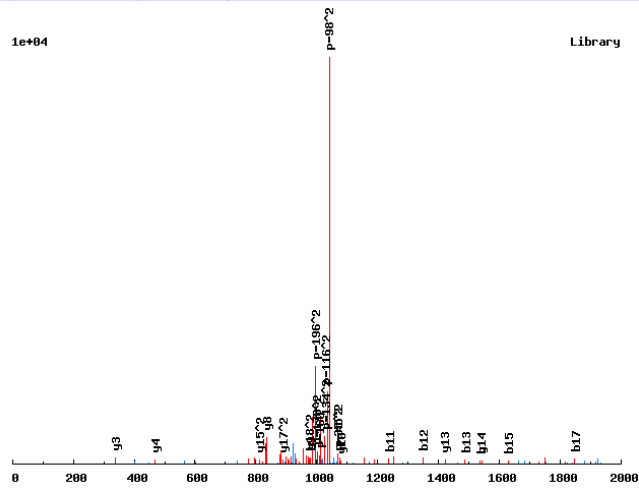

| Library | b <sup>1+</sup> | b <sup>2+</sup> | #  | AA     | #  | y <sup>1+</sup> | y <sup>2+</sup> |
|---------|-----------------|-----------------|----|--------|----|-----------------|-----------------|
|         | 168.0056        | 84.5065         | 1  | S[167] | 20 |                 |                 |
|         | 239.0428        | 120.0250        | 2  | A      | 19 | 2016.8841       | 1008.9457       |
|         | 406.0411        | 203.5242        | 3  | S[167] | 18 | 1945.8470       | 973.4271        |
|         | 505.1095        | 253.0584        | 4  | V      | 17 | 1778.8486       | 889.9279        |
|         | 562.1310        | 281.5691        | 5  | G      | 16 | 1679.7802       | 840.3937        |
|         | 649.1630        | 325.0851        | 6  | S      | 15 | 1622.7587       | 811.8830        |
|         | 763.2059        | 382.1066        | 7  | N      | 14 | 1535.7267       | 768.3670        |
|         | 891.2645        | 446.1359        | 8  | Q      | 13 | 1421.6838       | 711.3455        |
|         | 978.2966        | 489.6519        | 9  | S      | 12 | 1293.6252       | 647.3162        |
|         | 1107.3391       | 554.1732        | 10 | E      | 11 | 1206.5932       | 603.8002        |
|         | 1235.3977       | 618.2025        | 11 | Q      | 10 | 1077.5506       | 539.2789        |
|         | 1350.4247       | 675.7160        | 12 | D      | 9  | 949.4920        | 475.2496        |
|         | 1486.5338       | 743.7706        | 13 | K[136] | 8  | 834.4650        | 417.7362        |
|         | 1543.5553       | 772.2813        | 14 | G      | 7  | 698.3559        | 349.6816        |
|         | 1630.5873       | 815.7973        | 15 | S      | 6  | 641.3344        | 321.1709        |
|         | 1717.6193       | 859.3133        | 16 | S      | 5  | 554.3024        | 277.6548        |
|         | 1845.6779       | 923.3426        | 17 | Q      | 4  | 467.2704        | 234.1388        |
|         | 1932.7100       | 966.8586        | 18 | S      | 3  | 339.2118        | 170.1095        |
|         | 2029.7627       | 1015.3850       | 19 | P      | 2  | 252.1798        | 126.5935        |
|         |                 |                 | 20 | K[136] | 1  | 155.1270        | 78.0671         |

# Annotated spectra from Saleem et. al. 2009

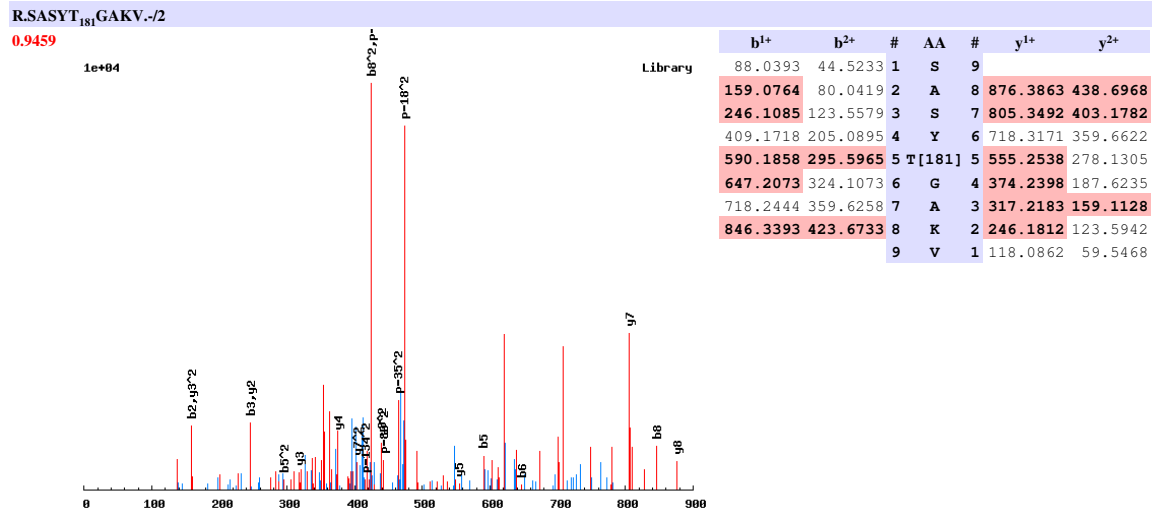

# Annotated spectra from Saleem et. al. 2009

R.S<sub>167</sub>AT<sub>181</sub>PR<sub>166</sub>IEDEEDTR<sub>166</sub>M/2

0.7695

1e+04

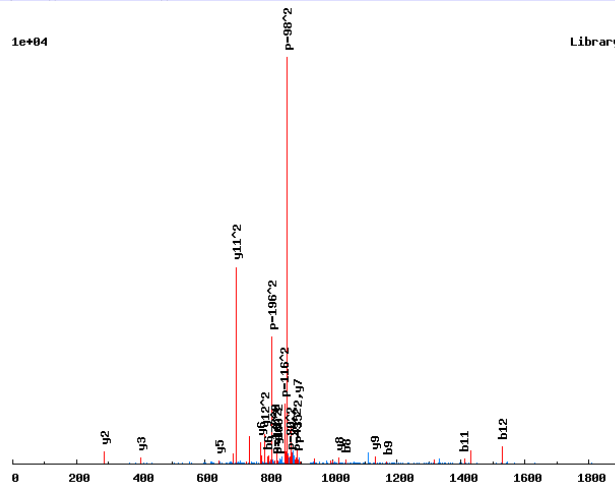

| Library | b <sup>1+</sup> | b <sup>2+</sup> | #  | AA | #     | y <sup>1+</sup> | y <sup>2+</sup> |         |
|---------|-----------------|-----------------|----|----|-------|-----------------|-----------------|---------|
|         | 168.0056        | 84.5065         | 1  | S  | [167] | 14              |                 |         |
|         | 239.0428        | 120.0250        | 2  | A  | 13    | 1646.6808       | 823.8440        |         |
|         | 420.0568        | 210.5320        | 3  | T  | [181] | 12              | 1575.6437       |         |
|         | 517.1095        | 259.0584        | 4  | P  | 11    | 1394.6297       | 697.8185        |         |
|         | 683.2189        | 342.1131        | 5  | R  | [166] | 10              | 1297.5769       |         |
|         | 796.3030        | 398.6551        | 6  | I  | 9     | 1131.4675       | 566.2374        |         |
|         | 925.3456        | 463.1764        | 7  | E  | 8     | 1018.3835       | 509.6954        |         |
|         | 1040.3725       | 520.6899        | 8  | D  | 7     | 889.3409        | 445.1741        |         |
|         | 1169.4151       | 585.2112        | 9  | E  | 6     | 774.3140        | 387.6606        |         |
|         | 1298.4577       | 649.7325        | 10 | E  | 5     | 645.2714        | 323.1393        |         |
|         | 1413.4846       | 707.2459        | 11 | D  | 4     | 516.2288        | 258.6180        |         |
|         | 1528.5116       | 764.7594        | 12 | D  | 3     | 401.2018        | 201.1046        |         |
|         | 1629.5592       | 815.2833        | 13 | T  | 2     | 286.1749        | 143.5911        |         |
|         |                 |                 | 14 | R  | [166] | 1               | 185.1272        | 93.0672 |

# Annotated spectra from Saleem et. al. 2009

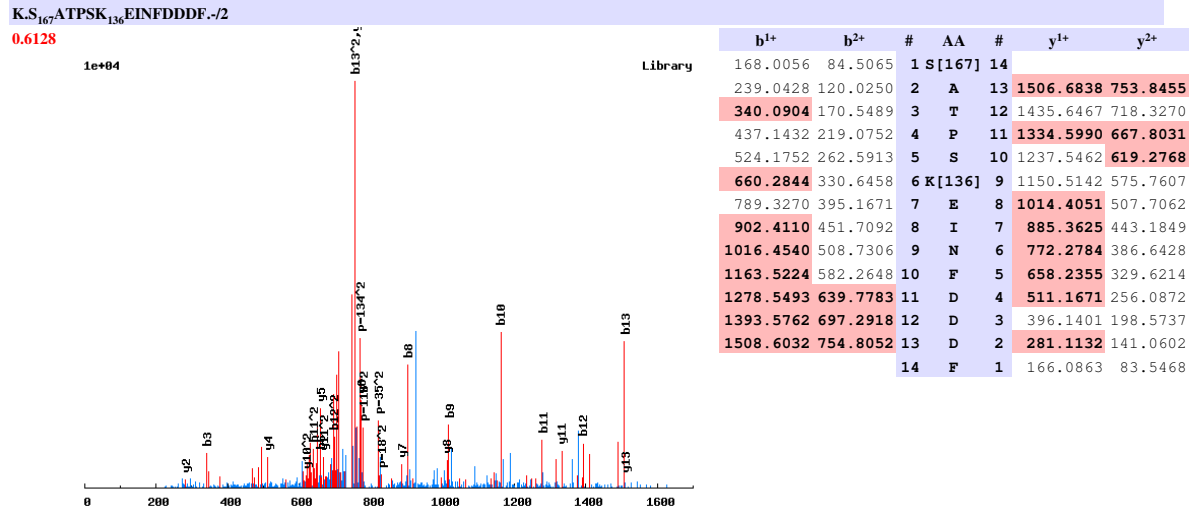

# Annotated spectra from Saleem et. al. 2009

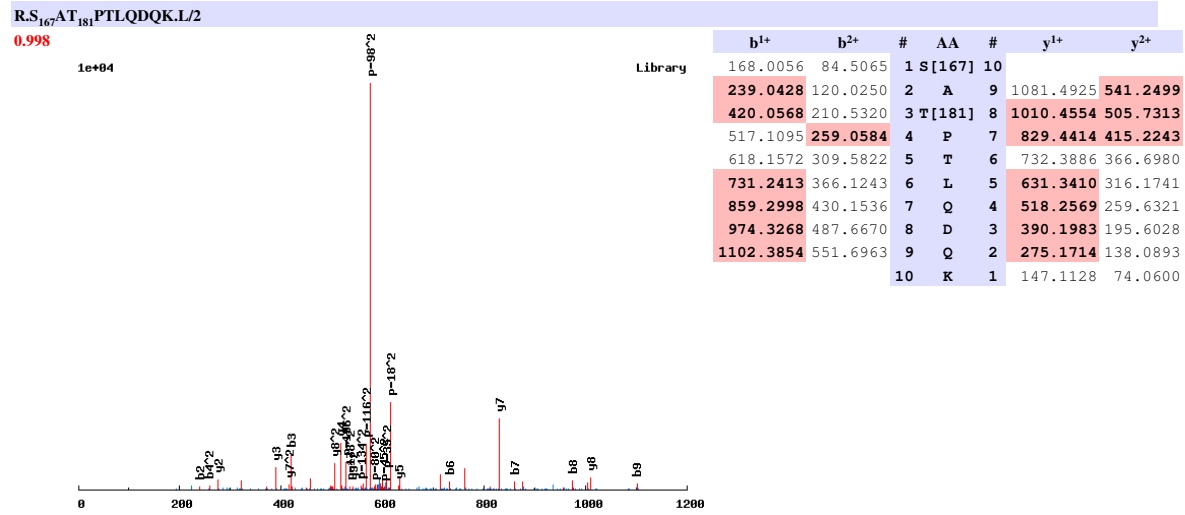

# Annotated spectra from Saleem et. al. 2009

R.SAT<sub>181</sub>RS<sub>167</sub>PS<sub>167</sub>AFNR.A/2

0.9971

1e+04

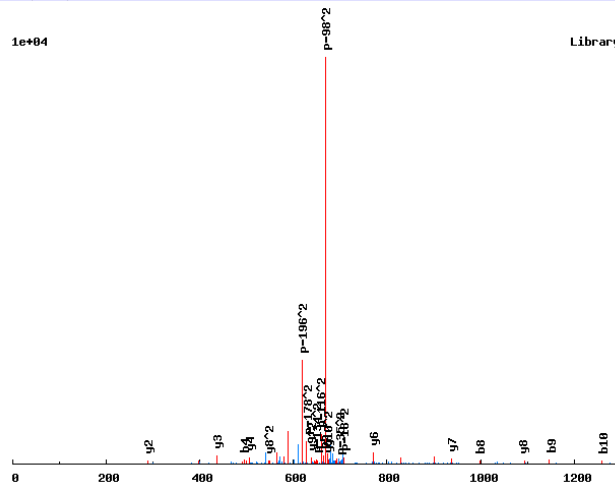

| Library | b <sup>1+</sup> | b <sup>2+</sup> | #  | AA     | #  | y <sup>1+</sup> | y <sup>2+</sup> |
|---------|-----------------|-----------------|----|--------|----|-----------------|-----------------|
|         | 88.0393         | 44.5233         | 1  | S      | 11 |                 |                 |
|         | 159.0764        | 80.0419         | 2  | A      | 10 | 1346.4691       | 673.7382        |
|         | 340.0904        | 170.5489        | 3  | T[181] | 9  | 1275.4320       | 638.2196        |
|         | 496.1915        | 248.5994        | 4  | R      | 8  | 1094.4180       | 547.7126        |
|         | 663.1899        | 332.0986        | 5  | S[167] | 7  | 938.3169        | 469.6621        |
|         | 760.2427        | 380.6250        | 6  | P      | 6  | 771.3185        | 386.1629        |
|         | 927.2410        | 464.1242        | 7  | S[167] | 5  | 674.2658        | 337.6365        |
|         | 998.2781        | 499.6427        | 8  | A      | 4  | 507.2674        | 254.1373        |
|         | 1145.3465       | 573.1769        | 9  | F      | 3  | 436.2303        | 218.6188        |
|         | 1259.3895       | 630.1984        | 10 | N      | 2  | 289.1619        | 145.0846        |
|         |                 |                 | 11 | R      | 1  | 175.1190        | 88.0631         |

# Annotated spectra from Saleem et. al. 2009

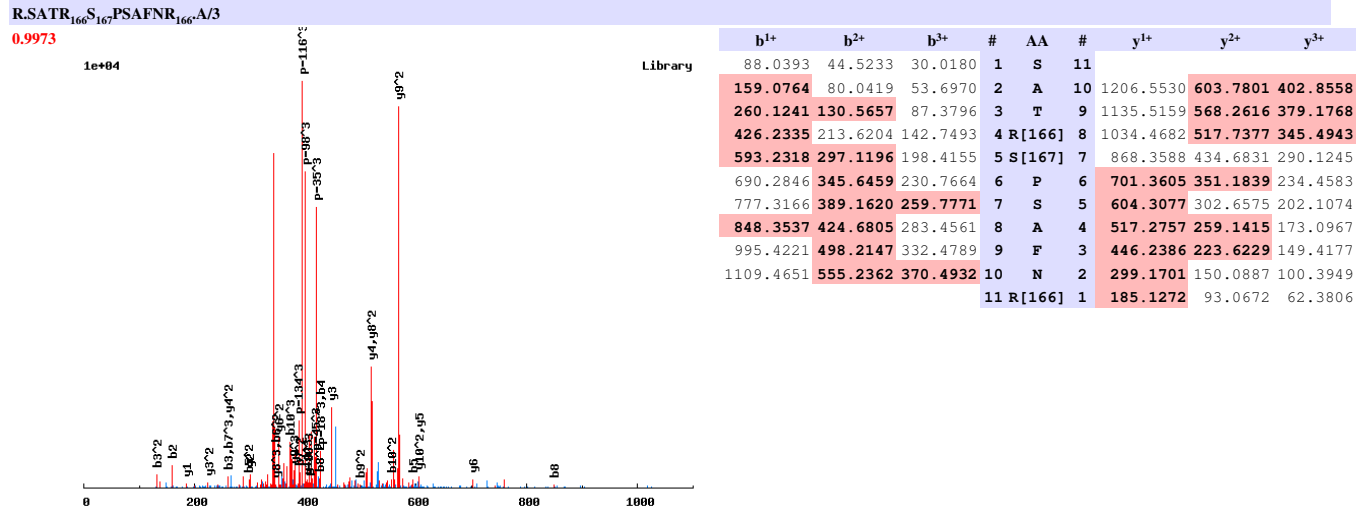

# Annotated spectra from Saleem et. al. 2009

R.S<sub>167</sub>ATR<sub>166</sub>SPS<sub>167</sub>AFNR<sub>166</sub>A/3

0.5892

1e+04

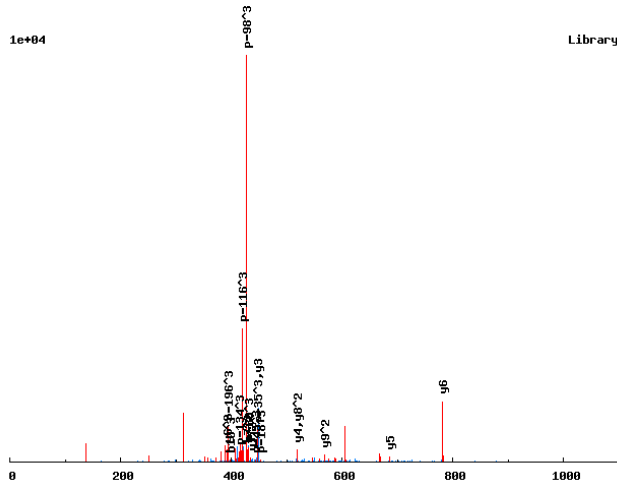

| Library | b <sup>1+</sup> | b <sup>2+</sup> | b <sup>3+</sup> | #  | AA     | #  | y <sup>1+</sup> | y <sup>2+</sup> | y <sup>3+</sup> |
|---------|-----------------|-----------------|-----------------|----|--------|----|-----------------|-----------------|-----------------|
|         | 168.0056        | 84.5065         | 56.6734         | 1  | S[167] | 11 |                 |                 |                 |
|         | 239.0428        | 120.0250        | 80.3524         | 2  | A      | 10 | 1206.5530       | 603.7801        | 402.8558        |
|         | 340.0904        | 170.5489        | 114.0350        | 3  | T      | 9  | 1135.5159       | 568.2616        | 379.1768        |
|         | 506.1998        | 253.6035        | 169.4048        | 4  | R[166] | 8  | 1034.4682       | 517.7377        | 345.4943        |
|         | 593.2318        | 297.1196        | 198.4155        | 5  | S      | 7  | 868.3588        | 434.6831        | 290.1245        |
|         | 690.2846        | 345.6459        | 230.7664        | 6  | P      | 6  | 781.3268        | 391.1670        | 261.1138        |
|         | 857.2830        | 429.1451        | 286.4325        | 7  | S[167] | 5  | 684.2740        | 342.6407        | 228.7629        |
|         | 928.3201        | 464.6637        | 310.1115        | 8  | A      | 4  | 517.2757        | 259.1415        | 173.0967        |
|         | 1075.3885       | 538.1979        | 359.1343        | 9  | F      | 3  | 446.2386        | 223.6229        | 149.4177        |
|         | 1189.4314       | 595.2193        | 397.1487        | 10 | N      | 2  | 299.1701        | 150.0887        | 100.3949        |
|         |                 |                 |                 | 11 | R[166] | 1  | 185.1272        | 93.0672         | 62.3806         |



# Annotated spectra from Saleem et. al. 2009

R.S<sub>167</sub>ATS<sub>167</sub>INLSSHPVSSR.S/2

0.9969

1e+04

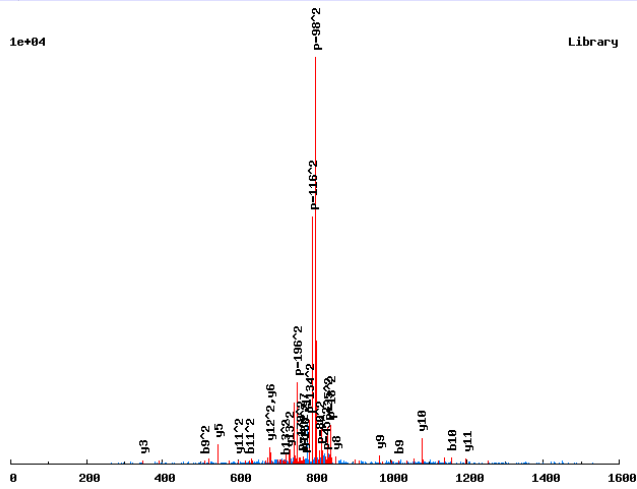

| Library | b <sup>1+</sup>  | b <sup>2+</sup> | #  | AA | #     | y <sup>1+</sup>  | y <sup>2+</sup> |                 |
|---------|------------------|-----------------|----|----|-------|------------------|-----------------|-----------------|
|         | 168.0056         | 84.5065         | 1  | S  | [167] | 15               |                 |                 |
|         | 239.0428         | 120.0250        | 2  | A  | 14    | 1535.7214        | <b>768.3643</b> |                 |
|         | 340.0904         | 170.5489        | 3  | T  | 13    | 1464.6842        | <b>732.8458</b> |                 |
|         | 507.0888         | 254.0480        | 4  | S  | [167] | 12               | 1363.6366       | <b>682.3219</b> |
|         | 620.1729         | 310.5901        | 5  | I  | 11    | <b>1196.6382</b> | <b>598.8227</b> |                 |
|         | 734.2158         | 367.6115        | 6  | N  | 10    | <b>1083.5541</b> | 542.2807        |                 |
|         | 847.2998         | 424.1536        | 7  | L  | 9     | <b>969.5112</b>  | 485.2592        |                 |
|         | 934.3319         | 467.6696        | 8  | S  | 8     | <b>856.4272</b>  | 428.7172        |                 |
|         | <b>1021.3639</b> | <b>511.1856</b> | 9  | S  | 7     | <b>769.3951</b>  | 385.2012        |                 |
|         | <b>1158.4228</b> | 579.7150        | 10 | H  | 6     | <b>682.3631</b>  | 341.6852        |                 |
|         | 1255.4756        | <b>628.2414</b> | 11 | P  | 5     | <b>545.3042</b>  | 273.1557        |                 |
|         | 1354.5440        | 677.7756        | 12 | V  | 4     | 448.2514         | 224.6293        |                 |
|         | 1441.5760        | <b>721.2916</b> | 13 | S  | 3     | <b>349.1830</b>  | 175.0951        |                 |
|         | 1528.6080        | 764.8077        | 14 | S  | 2     | 262.1510         | 131.5791        |                 |
|         |                  |                 | 15 | R  | 1     | 175.1190         | 88.0631         |                 |

# Annotated spectra from Saleem et. al. 2009

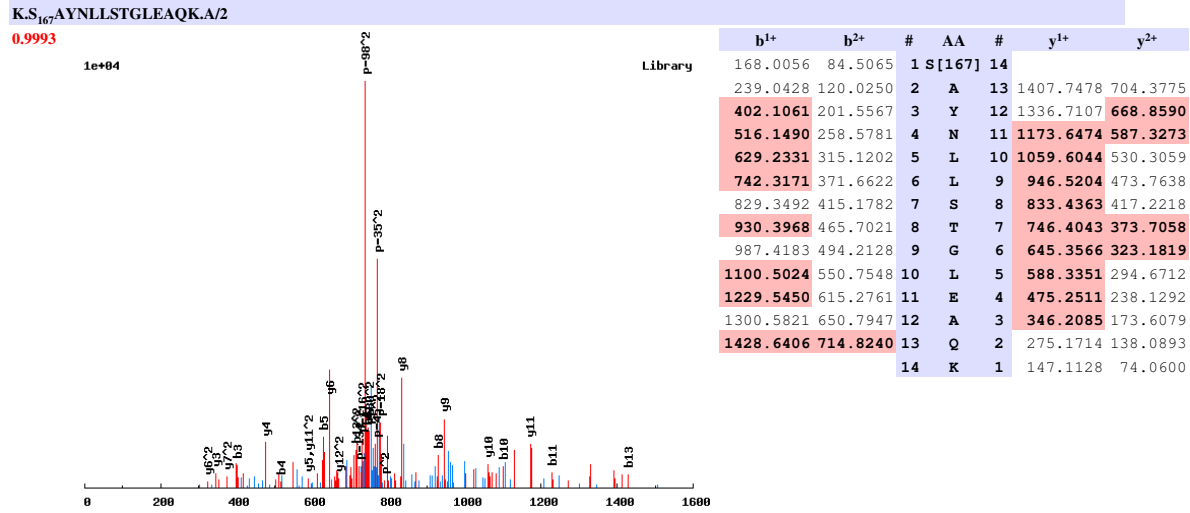

# Annotated spectra from Saleem et. al. 2009

R.S<sub>167</sub>C<sub>160</sub>SNTVMKLP<sub>T181</sub>PR.R/2

0.9852

1e+04

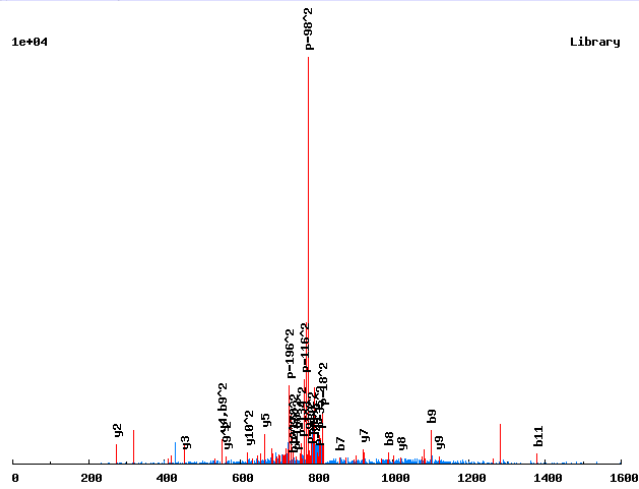

| Library | b <sup>1+</sup> | b <sup>2+</sup> | #  | AA | #     | y <sup>1+</sup> | y <sup>2+</sup>    |
|---------|-----------------|-----------------|----|----|-------|-----------------|--------------------|
|         | 168.0056        | 84.5065         | 1  | S  | [167] | 13              |                    |
|         | 328.0363        | 164.5218        | 2  | C  | [160] | 12              | 1483.6797 742.3435 |
|         | 415.0683        | 208.0378        | 3  | S  |       | 11              | 1323.6490 662.3282 |
|         | 529.1113        | 265.0593        | 4  | N  |       | 10              | 1236.6170 618.8121 |
|         | 630.1589        | 315.5831        | 5  | T  |       | 9               | 1122.5741 561.7907 |
|         | 729.2273        | 365.1173        | 6  | V  |       | 8               | 1021.5264 511.2668 |
|         | 860.2678        | 430.6376        | 7  | M  |       | 7               | 922.4580 461.7326  |
|         | 988.3628        | 494.6850        | 8  | K  |       | 6               | 791.4175 396.2124  |
|         | 1101.4469       | 551.2271        | 9  | L  |       | 5               | 663.3225 332.1649  |
|         | 1198.4996       | 599.7534        | 10 | P  |       | 4               | 550.2385 275.6229  |
|         | 1379.5136       | 690.2605        | 11 | T  | [181] | 3               | 453.1857 227.0965  |
|         | 1476.5664       | 738.7868        | 12 | P  |       | 2               | 272.1717 136.5895  |
|         |                 |                 | 13 | R  |       | 1               | 175.1190 88.0631   |

# Annotated spectra from Saleem et. al. 2009

K.SDEPS<sub>167</sub>R<sub>166</sub>ES<sub>167</sub>TPVR<sub>166</sub>S/3

0.9937

1e+04

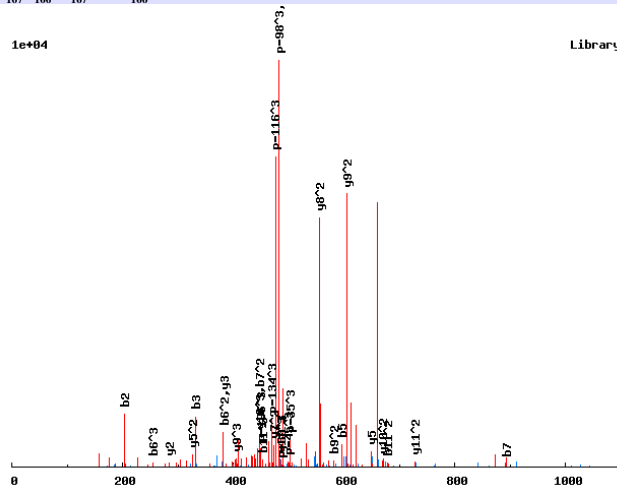

| Library | b <sup>1+</sup> | b <sup>2+</sup> | b <sup>3+</sup> | #  | AA     | #  | y <sup>1+</sup> | y <sup>2+</sup> | y <sup>3+</sup> |
|---------|-----------------|-----------------|-----------------|----|--------|----|-----------------|-----------------|-----------------|
|         | 88.0393         | 44.5233         | 30.0180         | 1  | S      | 12 |                 |                 |                 |
|         | 203.0662        | 102.0368        | 68.3603         | 2  | D      | 11 | 1452.5671       | 726.7872        | 484.8605        |
|         | 332.1088        | 166.5581        | 111.3745        | 3  | E      | 10 | 1337.5401       | 669.2737        | 446.5182        |
|         | 429.1616        | 215.0844        | 143.7254        | 4  | P      | 9  | 1208.4975       | 604.7524        | 403.5040        |
|         | 596.1600        | 298.5836        | 199.3915        | 5  | S[167] | 8  | 1111.4448       | 556.2260        | 371.1531        |
|         | 762.2693        | 381.6383        | 254.7613        | 6  | R[166] | 7  | 944.4464        | 472.7268        | 315.4870        |
|         | 891.3119        | 446.1596        | 297.7755        | 7  | E      | 6  | 778.3370        | 389.6722        | 260.1172        |
|         | 1058.3103       | 529.6588        | 353.4416        | 8  | S[167] | 5  | 649.2944        | 325.1509        | 217.1030        |
|         | 1159.3580       | 580.1826        | 387.1242        | 9  | T      | 4  | 482.2961        | 241.6517        | 161.4369        |
|         | 1256.4107       | 628.7090        | 419.4751        | 10 | P      | 3  | 381.2484        | 191.1278        | 127.7543        |
|         | 1355.4791       | 678.2432        | 452.4979        | 11 | V      | 2  | 284.1956        | 142.6015        | 95.4034         |
|         |                 |                 |                 | 12 | R[166] | 1  | 185.1272        | 93.0672         | 62.3806         |

# Annotated spectra from Saleem et. al. 2009

K.SDIS<sub>167</sub>-PSDKEVGYLS<sub>167</sub>-DGVPKL/3

0.9934

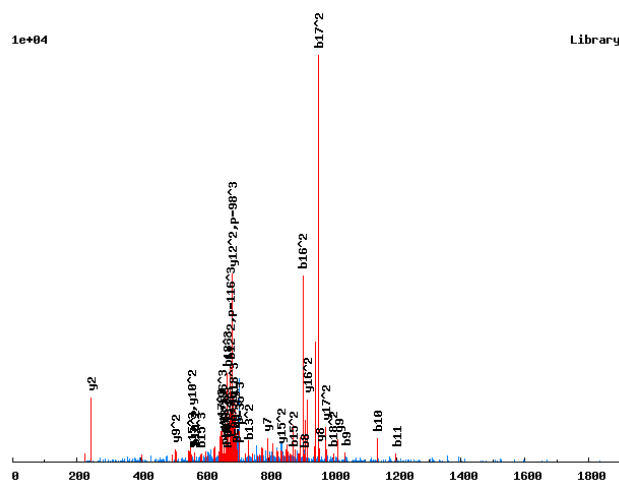

| Library | b <sup>1+</sup> | b <sup>2+</sup> | b <sup>3+</sup> | #  | AA     | #  | y <sup>1+</sup> | y <sup>2+</sup> | y <sup>3+</sup> |
|---------|-----------------|-----------------|-----------------|----|--------|----|-----------------|-----------------|-----------------|
|         | 88.0393         | 44.5233         | 30.0180         | 1  | S      | 19 |                 |                 |                 |
|         | 203.0662        | 102.0368        | 68.3603         | 2  | D      | 18 | 2065.8766       | 1033.4420       | 689.2971        |
|         | 316.1503        | 158.5788        | 106.0550        | 3  | I      | 17 | 1950.8497       | 975.9285        | 650.9548        |
|         | 483.1487        | 242.0780        | 161.7211        | 4  | S[167] | 16 | 1837.7656       | 919.3865        | 613.2601        |
|         | 580.2014        | 290.6044        | 194.0720        | 5  | P      | 15 | 1670.7673       | 835.8873        | 557.5939        |
|         | 667.2335        | 334.1204        | 223.0827        | 6  | S      | 14 | 1573.7145       | 787.3609        | 525.2430        |
|         | 782.2604        | 391.6338        | 261.4250        | 7  | D      | 13 | 1486.6825       | 743.8449        | 496.2323        |
|         | 910.3554        | 455.6813        | 304.1233        | 8  | K      | 12 | 1371.6555       | 686.3314        | 457.8900        |
|         | 1039.3980       | 520.2026        | 347.1375        | 9  | E      | 11 | 1243.5606       | 622.2839        | 415.1917        |
|         | 1138.4664       | 569.7368        | 380.1603        | 10 | V      | 10 | 1114.5180       | 557.7626        | 372.1775        |
|         | 1195.4878       | 598.2476        | 399.1675        | 11 | G      | 9  | 1015.4496       | 508.2284        | 339.1547        |
|         | 1358.5512       | 679.7792        | 453.5219        | 12 | Y      | 8  | 958.4281        | 479.7177        | 320.1476        |
|         | 1471.6352       | 736.3212        | 491.2166        | 13 | L      | 7  | 795.3648        | 398.1860        | 265.7931        |
|         | 1638.6336       | 819.8204        | 546.8827        | 14 | S[167] | 6  | 682.2807        | 341.6440        | 228.0984        |
|         | 1753.6605       | 877.3339        | 585.2250        | 15 | D      | 5  | 515.2824        | 258.1448        | 172.4323        |
|         | 1810.6820       | 905.8446        | 604.2322        | 16 | G      | 4  | 400.2554        | 200.6314        | 134.0900        |
|         | 1909.7504       | 955.3788        | 637.2550        | 17 | V      | 3  | 343.2340        | 172.1206        | 115.0828        |
|         | 2006.8031       | 1003.9052       | 669.6059        | 18 | P      | 2  | 244.1656        | 122.5864        | 82.0600         |
|         |                 |                 |                 | 19 | K      | 1  | 147.1128        | 74.0600         | 49.7091         |

Annotated spectra from Saleem et. al. 2009

R.SDS<sub>167</sub>ASFLEEKEEPQENHDNKEEQS.-/3

0.9147

1e+04

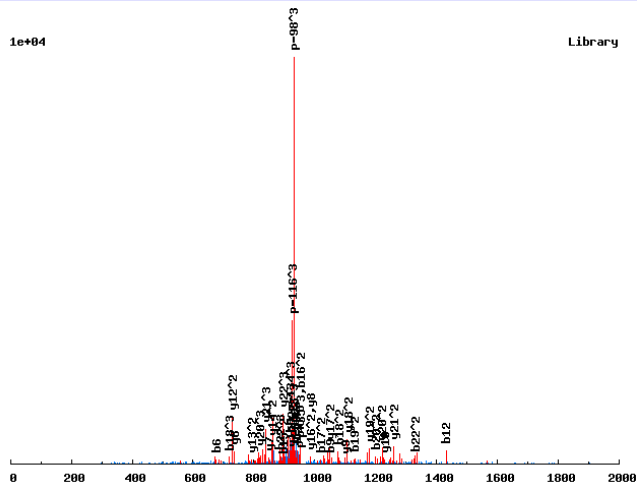

| Library | b <sup>1+</sup> | b <sup>2+</sup> | b <sup>3+</sup> | #  | AA     | #  | y <sup>1+</sup> | y <sup>2+</sup> | y <sup>3+</sup> |
|---------|-----------------|-----------------|-----------------|----|--------|----|-----------------|-----------------|-----------------|
|         | 88.0393         | 44.5233         | 30.0180         | 1  | S      | 24 |                 |                 |                 |
|         | 203.0662        | 102.0368        | 68.3603         | 2  | D      | 23 | 2799.1265       | 1400.0669       | 933.7137        |
|         | 370.0646        | 185.5359        | 124.0264        | 3  | S[167] | 22 | 2684.0995       | 1342.5534       | 895.3714        |
|         | 441.1017        | 221.0545        | 147.7054        | 4  | A      | 21 | 2517.1012       | 1259.0542       | 839.7052        |
|         | 528.1338        | 264.5705        | 176.7161        | 5  | S      | 20 | 2446.0640       | 1223.5357       | 816.0262        |
|         | 675.2022        | 338.1047        | 225.7389        | 6  | F      | 19 | 2359.0320       | 1180.0196       | 787.0155        |
|         | 788.2862        | 394.6468        | 263.4336        | 7  | L      | 18 | 2211.9636       | 1106.4854       | 737.9927        |
|         | 917.3288        | 459.1680        | 306.4478        | 8  | E      | 17 | 2098.8795       | 1049.9434       | 700.2980        |
|         | 1046.3714       | 523.6893        | 349.4620        | 9  | E      | 16 | 1969.8370       | 985.4221        | 657.2838        |
|         | 1174.4664       | 587.7368        | 392.1603        | 10 | K      | 15 | 1840.7944       | 920.9008        | 614.2696        |
|         | 1303.5090       | 652.2581        | 435.1745        | 11 | E      | 14 | 1712.6994       | 856.8533        | 571.5713        |
|         | 1432.5515       | 716.7794        | 478.1887        | 12 | E      | 13 | 1583.6568       | 792.3320        | 528.5571        |
|         | 1529.6043       | 765.3058        | 510.5396        | 13 | P      | 12 | 1454.6142       | 727.8108        | 485.5429        |
|         | 1657.6629       | 829.3351        | 553.2258        | 14 | Q      | 11 | 1357.5615       | 679.2844        | 453.1920        |
|         | 1786.7055       | 893.8564        | 596.2400        | 15 | E      | 10 | 1229.5029       | 615.2551        | 410.5058        |
|         | 1900.7484       | 950.8778        | 634.2543        | 16 | N      | 9  | 1100.4603       | 550.7338        | 367.4916        |
|         | 2037.8073       | 1019.4073       | 679.9406        | 17 | H      | 8  | 986.4174        | 493.7123        | 329.4773        |
|         | 2152.8343       | 1076.9208       | 718.2829        | 18 | D      | 7  | 849.3585        | 425.1829        | 283.7910        |
|         | 2266.8772       | 1133.9422       | 756.2972        | 19 | N      | 6  | 734.3315        | 367.6694        | 245.4487        |
|         | 2394.9721       | 1197.9897       | 798.9956        | 20 | K      | 5  | 620.2886        | 310.6479        | 207.4344        |
|         | 2524.0147       | 1262.5110       | 842.0098        | 21 | E      | 4  | 492.1936        | 246.6005        | 164.7361        |
|         | 2653.0573       | 1327.0323       | 885.0240        | 22 | E      | 3  | 363.1510        | 182.0792        | 121.7219        |
|         | 2781.1159       | 1391.0616       | 927.7102        | 23 | Q      | 2  | 234.1085        | 117.5579        | 78.7077         |
|         |                 |                 |                 | 24 | S      | 1  | 106.0499        | 53.5286         | 36.0215         |

# Annotated spectra from Saleem et. al. 2009

R.SDS<sub>167</sub>AS<sub>167</sub>FLEEK<sub>136</sub>EPPQENHDNK<sub>136</sub>EEQS.-/3

0.7334

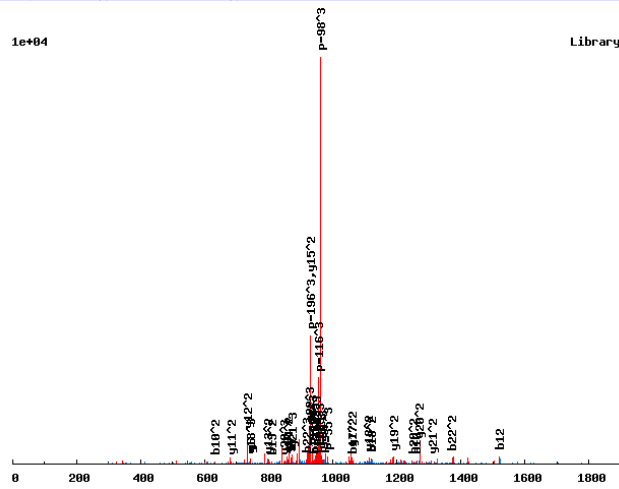

| Library | b <sup>1+</sup> | b <sup>2+</sup> | b <sup>3+</sup> | #  | AA     | #  | y <sup>1+</sup> | y <sup>2+</sup> | y <sup>3+</sup> |
|---------|-----------------|-----------------|-----------------|----|--------|----|-----------------|-----------------|-----------------|
|         | 88.0393         | 44.5233         | 30.0180         | 1  | S      | 24 |                 |                 |                 |
|         | 203.0662        | 102.0368        | 68.3603         | 2  | D      | 23 | 2895.1212       | 1448.0642       | 965.7119        |
|         | 370.0646        | 185.5359        | 124.0264        | 3  | S[167] | 22 | 2780.0943       | 1390.5508       | 927.3696        |
|         | 441.1017        | 221.0545        | 147.7054        | 4  | A      | 21 | 2613.0959       | 1307.0516       | 871.7035        |
|         | 608.1001        | 304.5537        | 203.3715        | 5  | S[167] | 20 | 2542.0588       | 1271.5330       | 848.0244        |
|         | 755.1685        | 378.0879        | 252.3944        | 6  | F      | 19 | 2375.0604       | 1188.0338       | 792.3583        |
|         | 868.2526        | 434.6299        | 290.0890        | 7  | L      | 18 | 2227.9920       | 1114.4996       | 743.3355        |
|         | 997.2951        | 499.1512        | 333.1032        | 8  | E      | 17 | 2114.9079       | 1057.9576       | 705.6408        |
|         | 1126.3377       | 563.6725        | 376.1174        | 9  | E      | 16 | 1985.8654       | 993.4363        | 662.6266        |
|         | 1262.4469       | 631.7271        | 421.4872        | 10 | K[136] | 15 | 1856.8228       | 928.9150        | 619.6124        |
|         | 1391.4895       | 696.2484        | 464.5013        | 11 | E      | 14 | 1720.7136       | 860.8604        | 574.2427        |
|         | 1520.5321       | 760.7697        | 507.5155        | 12 | E      | 13 | 1591.6710       | 796.3391        | 531.2285        |
|         | 1617.5848       | 809.2961        | 539.8665        | 13 | P      | 12 | 1462.6284       | 731.8179        | 488.2143        |
|         | 1745.6434       | 873.3253        | 582.5527        | 14 | Q      | 11 | 1365.5757       | 683.2915        | 455.8634        |
|         | 1874.6860       | 937.8466        | 625.5669        | 15 | E      | 10 | 1237.5171       | 619.2622        | 413.1772        |
|         | 1988.7289       | 994.8681        | 663.5812        | 16 | N      | 9  | 1108.4745       | 554.7409        | 370.1630        |
|         | 2125.7878       | 1063.3976       | 709.2675        | 17 | H      | 8  | 994.4316        | 497.7194        | 332.1487        |
|         | 2240.8148       | 1120.9110       | 747.6098        | 18 | D      | 7  | 857.3727        | 429.1900        | 286.4624        |
|         | 2354.8577       | 1177.9325       | 785.6241        | 19 | N      | 6  | 742.3457        | 371.6765        | 248.1201        |
|         | 2490.9669       | 1245.9871       | 830.9938        | 20 | K[136] | 5  | 628.3028        | 314.6550        | 210.1058        |
|         | 2620.0095       | 1310.5084       | 874.0080        | 21 | E      | 4  | 492.1936        | 246.6005        | 164.7361        |
|         | 2749.0521       | 1375.0297       | 917.0222        | 22 | E      | 3  | 363.1510        | 182.0792        | 121.7219        |
|         | 2877.1106       | 1439.0590       | 959.7084        | 23 | Q      | 2  | 234.1085        | 117.5579        | 78.7077         |
|         |                 |                 |                 | 24 | S      | 1  | 106.0499        | 53.5286         | 36.0215         |

# Annotated spectra from Saleem et. al. 2009

R.S<sub>167</sub>DSAVSIVHLK<sub>136</sub>R/2

1

1e+04

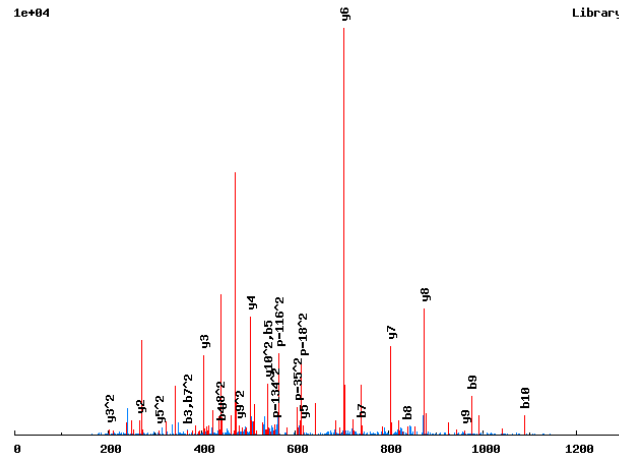

| Library | b <sup>1+</sup> | b <sup>2+</sup> | #  | AA     | #  | y <sup>1+</sup> | y <sup>2+</sup> |
|---------|-----------------|-----------------|----|--------|----|-----------------|-----------------|
|         | 168.0056        | 84.5065         | 1  | S[167] | 11 |                 |                 |
|         | 283.0326        | 142.0199        | 2  | D      | 10 | 1076.6190       | 538.8131        |
|         | 370.0646        | 185.5359        | 3  | S      | 9  | 961.5920        | 481.2996        |
|         | 441.1017        | 221.0545        | 4  | A      | 8  | 874.5600        | 437.7836        |
|         | 540.1701        | 270.5887        | 5  | V      | 7  | 803.5229        | 402.2651        |
|         | 627.2022        | 314.1047        | 6  | S      | 6  | 704.4545        | 352.7309        |
|         | 740.2862        | 370.6468        | 7  | I      | 5  | 617.4224        | 309.2149        |
|         | 839.3546        | 420.1810        | 8  | V      | 4  | 504.3384        | 252.6728        |
|         | 976.4135        | 488.7104        | 9  | H      | 3  | 405.2700        | 203.1386        |
|         | 1089.4976       | 545.2524        | 10 | L      | 2  | 268.2111        | 134.6092        |
|         |                 |                 | 11 | K[136] | 1  | 155.1270        | 78.0671         |



# Annotated spectra from Saleem et. al. 2009

R.S<sub>167</sub>DSAVS<sub>167</sub>IVHLK<sub>136</sub>R<sub>166</sub>A/2

0.9841

1e+04

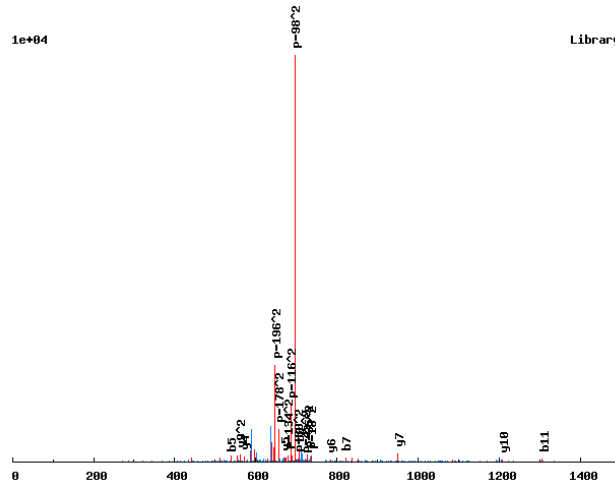

| Library | b <sup>1+</sup> | b <sup>2+</sup> | #  | AA     | #  | y <sup>1+</sup> | y <sup>2+</sup> |
|---------|-----------------|-----------------|----|--------|----|-----------------|-----------------|
|         | 168.0056        | 84.5065         | 1  | S[167] | 12 |                 |                 |
|         | 283.0326        | 142.0199        | 2  | D      | 11 | 1322.6947       | 661.8510        |
|         | 370.0646        | 185.5359        | 3  | S      | 10 | 1207.6677       | 604.3375        |
|         | 441.1017        | 221.0545        | 4  | A      | 9  | 1120.6357       | 560.8215        |
|         | 540.1701        | 270.5887        | 5  | V      | 8  | 1049.5986       | 525.3029        |
|         | 707.1685        | 354.0879        | 6  | S[167] | 7  | 950.5302        | 475.7687        |
|         | 820.2526        | 410.6299        | 7  | I      | 6  | 783.5318        | 392.2695        |
|         | 919.3210        | 460.1641        | 8  | V      | 5  | 670.4478        | 335.7275        |
|         | 1056.3799       | 528.6936        | 9  | H      | 4  | 571.3793        | 286.1933        |
|         | 1169.4639       | 585.2356        | 10 | L      | 3  | 434.3204        | 217.6639        |
|         | 1305.5731       | 653.2902        | 11 | K[136] | 2  | 321.2364        | 161.1218        |
|         |                 |                 | 12 | R[166] | 1  | 185.1272        | 93.0672         |

# Annotated spectra from Saleem et. al. 2009

M.S.<sub>167</sub>DSEVNQEAKPEVKPEVKPETHNLK.V/S

0.9998

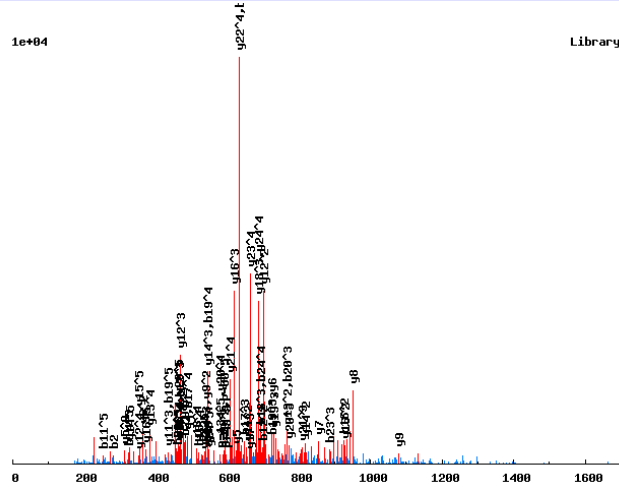

| Library | b <sup>1+</sup> | b <sup>2+</sup> | b <sup>3+</sup> | b <sup>4+</sup> | b <sup>5+</sup> | #  | AA | #        | y <sup>1+</sup>  | y <sup>2+</sup> | y <sup>3+</sup> | y <sup>4+</sup> | y <sup>5+</sup> |
|---------|-----------------|-----------------|-----------------|-----------------|-----------------|----|----|----------|------------------|-----------------|-----------------|-----------------|-----------------|
| 1       | 168.0056        | 84.5065         | 56.6734         | 42.7569         | 34.4070         | 1  | S  | [167] 26 |                  |                 |                 |                 |                 |
| 2       | <b>283.0326</b> | 142.0199        | 95.0157         | 71.5136         | 57.4123         | 2  | D  | 25       | 2858.4894        | 1429.7483       | 953.5013        | 715.3778        | 572.5037        |
| 3       | 370.0646        | 185.5359        | 124.0264        | 93.2716         | 74.8187         | 3  | S  | 24       | 2743.4624        | 1372.2349       | 915.1590        | <b>686.6211</b> | <b>549.4983</b> |
| 4       | 499.1072        | 250.0572        | 167.0406        | 125.5323        | 100.6273        | 4  | E  | 23       | 2656.4304        | 1328.7188       | 886.1483        | <b>664.8631</b> | <b>532.0919</b> |
| 5       | 598.1756        | 299.5914        | 200.0634        | 150.2994        | 120.4409        | 5  | V  | 22       | 2527.3878        | 1264.1975       | 843.1341        | <b>632.6024</b> | 506.2834        |
| 6       | 712.2185        | 356.6129        | 238.0777        | 178.8101        | 143.2495        | 6  | N  | 21       | 2428.3194        | 1214.6633       | <b>810.1113</b> | <b>607.8353</b> | 486.4697        |
| 7       | 840.2771        | 420.6422        | 280.7639        | 210.8247        | 168.8612        | 7  | Q  | 20       | 2314.2765        | 1157.6419       | <b>772.0970</b> | <b>579.3246</b> | <b>463.6611</b> |
| 8       | 969.3197        | 485.1635        | 323.7781        | 243.0854        | 194.6698        | 8  | E  | 19       | 2186.2179        | 1093.6126       | <b>729.4108</b> | <b>547.3099</b> | 438.0494        |
| 9       | 1040.3568       | 520.6821        | 347.4571        | 260.8447        | 208.8772        | 9  | A  | 18       | 2057.1753        | 1029.0913       | <b>686.3966</b> | <b>515.0493</b> | 412.2409        |
| 10      | 1168.4518       | 584.7295        | 390.1554        | 292.8684        | 234.4962        | 10 | K  | 17       | 1986.1382        | 993.5727        | <b>662.7176</b> | 497.2900        | 398.0335        |
| 11      | 1265.5045       | <b>633.2559</b> | 422.5064        | 317.1316        | <b>253.9067</b> | 11 | P  | 16       | 1858.0432        | <b>929.5253</b> | <b>620.0193</b> | <b>465.2663</b> | <b>372.4145</b> |
| 12      | 1394.5471       | <b>697.7772</b> | <b>465.5206</b> | 349.3922        | 279.7153        | 12 | E  | 15       | 1760.9905        | 880.9989        | 587.6683        | 441.0031        | <b>353.0039</b> |
| 13      | 1493.6155       | 747.3114        | 498.5434        | 374.1593        | 299.5289        | 13 | V  | 14       | 1631.9479        | <b>816.4776</b> | <b>544.6541</b> | 408.7424        | <b>327.1954</b> |
| 14      | 1621.7105       | 811.3589        | <b>541.2417</b> | 406.1831        | <b>325.1479</b> | 14 | K  | 13       | 1532.8795        | <b>766.9434</b> | 511.6313        | <b>383.9753</b> | 307.3817        |
| 15      | 1718.7633       | 859.8853        | 573.5926        | 430.4463        | 344.5585        | 15 | P  | 12       | 1404.7845        | <b>702.8959</b> | <b>468.9330</b> | <b>351.9516</b> | 281.7627        |
| 16      | 1847.8059       | <b>924.4066</b> | 616.6068        | <b>462.7069</b> | 370.3670        | 16 | E  | 11       | 1307.7317        | <b>654.3695</b> | <b>436.5821</b> | 327.6884        | 262.3522        |
| 17      | 1946.8743       | 973.9408        | <b>649.6296</b> | <b>487.4740</b> | 390.1807        | 17 | V  | 10       | 1178.6892        | <b>589.8482</b> | 393.5679        | 295.4278        | 236.5437        |
| 18      | 2074.9692       | 1037.9883       | <b>692.3279</b> | <b>519.4978</b> | 415.7997        | 18 | K  | 9        | <b>1079.6207</b> | <b>540.3140</b> | 360.5451        | 270.6606        | 216.7300        |
| 19      | 2172.0220       | 1086.5146       | <b>724.6788</b> | <b>543.7610</b> | <b>435.2102</b> | 19 | P  | 8        | <b>951.5258</b>  | <b>476.2665</b> | 317.8468        | 238.6369        | 191.1110        |
| 20      | 2301.0646       | 1151.0359       | <b>767.6930</b> | 576.0216        | <b>461.0187</b> | 20 | E  | 7        | <b>854.4730</b>  | 427.7402        | 285.4959        | 214.3737        | 171.7004        |
| 21      | 2402.1123       | 1201.5598       | 801.3756        | 601.2835        | <b>481.2283</b> | 21 | T  | 6        | <b>725.4304</b>  | <b>363.2189</b> | 242.4817        | 182.1131        | 145.8919        |
| 22      | 2539.1712       | 1270.0892       | 847.0619        | 635.5483        | 508.6401        | 22 | H  | 5        | <b>624.3828</b>  | <b>312.6950</b> | 208.7991        | 156.8512        | 125.6824        |
| 23      | 2652.2552       | 1326.6313       | <b>884.7566</b> | 663.8193        | 531.2569        | 23 | I  | 4        | <b>487.3238</b>  | 244.1656        | 163.1128        | 122.5864        | 98.2706         |
| 24      | 2766.2982       | 1383.6527       | 922.7709        | <b>692.3300</b> | 554.0655        | 24 | N  | 3        | 374.2398         | 187.6235        | 125.4181        | 94.3154         | 75.6538         |
| 25      | 2879.3822       | 1440.1947       | 960.4656        | 720.6010        | 576.6823        | 25 | L  | 2        | 260.1969         | 130.6021        | 87.4038         | 65.8047         | 52.8452         |
| 26      |                 |                 |                 |                 |                 | 26 | K  | 1        | 147.1128         | 74.0600         | 49.7091         | 37.5337         | 30.2284         |

# Annotated spectra from Saleem et. al. 2009

K.SDS<sub>167</sub>GTVLGAIPLNS<sub>167</sub>R.S/2

0.9907

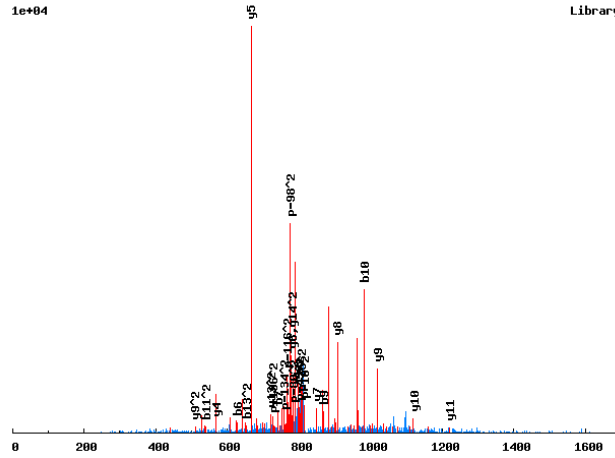

| Library | b <sup>1+</sup> | b <sup>2+</sup> | #  | AA     | #  | y <sup>1+</sup> | y <sup>2+</sup> |
|---------|-----------------|-----------------|----|--------|----|-----------------|-----------------|
|         | 88.0393         | 44.5233         | 1  | S      | 15 |                 |                 |
|         | 203.0662        | 102.0368        | 2  | D      | 14 | 1559.6866       | 780.3469        |
|         | 370.0646        | 185.5359        | 3  | S[167] | 13 | 1444.6597       | 722.8335        |
|         | 427.0861        | 214.0467        | 4  | G      | 12 | 1277.6613       | 639.3343        |
|         | 528.1338        | 264.5705        | 5  | T      | 11 | 1220.6398       | 610.8236        |
|         | 627.2022        | 314.1047        | 6  | V      | 10 | 1119.5922       | 560.2997        |
|         | 740.2862        | 370.6468        | 7  | L      | 9  | 1020.5238       | 510.7655        |
|         | 797.3077        | 399.1575        | 8  | G      | 8  | 907.4397        | 454.2235        |
|         | 868.3448        | 434.6760        | 9  | A      | 7  | 850.4182        | 425.7128        |
|         | 981.4289        | 491.2181        | 10 | I      | 6  | 779.3811        | 390.1942        |
|         | 1078.4816       | 539.7444        | 11 | P      | 5  | 666.2971        | 333.6522        |
|         | 1191.5657       | 596.2865        | 12 | L      | 4  | 569.2443        | 285.1258        |
|         | 1305.6086       | 653.3079        | 13 | N      | 3  | 456.1602        | 228.5838        |
|         | 1472.6070       | 736.8071        | 14 | S[167] | 2  | 342.1173        | 171.5623        |
|         |                 |                 | 15 | R      | 1  | 175.1190        | 88.0631         |

# Annotated spectra from Saleem et. al. 2009

R.S<sub>167</sub>DSPDVPSMDQIR<sub>166</sub>.E/2

0.9946

1e+04

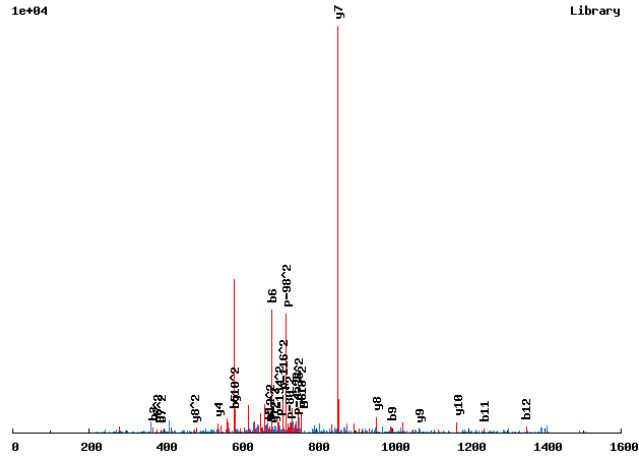

| Library | b <sup>1+</sup> | b <sup>2+</sup> | #  | AA | #     | y <sup>1+</sup> | y <sup>2+</sup> |         |
|---------|-----------------|-----------------|----|----|-------|-----------------|-----------------|---------|
|         | 168.0056        | 84.5065         | 1  | S  | [167] | 13              |                 |         |
|         | 283.0326        | 142.0199        | 2  | D  | 12    | 1369.6292       | 685.3182        |         |
|         | 370.0646        | 185.5359        | 3  | S  | 11    | 1254.6022       | 627.8047        |         |
|         | 467.1174        | 234.0623        | 4  | P  | 10    | 1167.5702       | 584.2887        |         |
|         | 582.1443        | 291.5758        | 5  | D  | 9     | 1070.5174       | 535.7624        |         |
|         | 681.2127        | 341.1100        | 6  | V  | 8     | 955.4905        | 478.2489        |         |
|         | 778.2655        | 389.6364        | 7  | P  | 7     | 856.4221        | 428.7147        |         |
|         | 865.2975        | 433.1524        | 8  | S  | 6     | 759.3693        | 380.1883        |         |
|         | 996.3380        | 498.6726        | 9  | M  | 5     | 672.3373        | 336.6723        |         |
|         | 1111.3649       | 556.1861        | 10 | D  | 4     | 541.2968        | 271.1520        |         |
|         | 1239.4235       | 620.2154        | 11 | Q  | 3     | 426.2699        | 213.6386        |         |
|         | 1352.5076       | 676.7574        | 12 | I  | 2     | 298.2113        | 149.6093        |         |
|         |                 |                 | 13 | R  | [166] | 1               | 185.1272        | 93.0672 |

# Annotated spectra from Saleem et. al. 2009

R.SDS<sub>167</sub>SGST<sub>181</sub>MNLDYK.L/2

0.9823

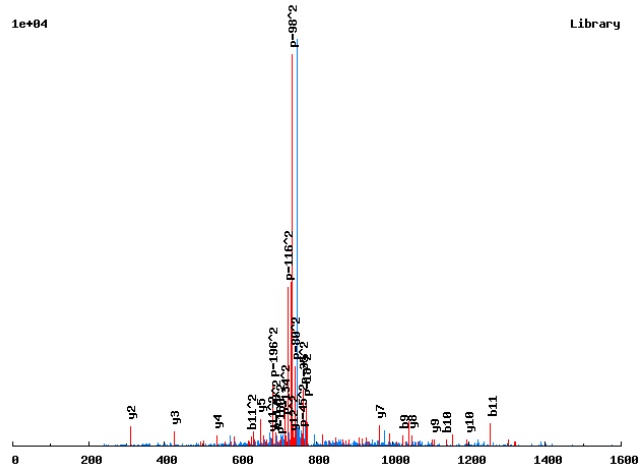

| Library | b <sup>1+</sup> | b <sup>2+</sup> | #  | AA     | #  | y <sup>1+</sup> | y <sup>2+</sup> |
|---------|-----------------|-----------------|----|--------|----|-----------------|-----------------|
|         | 88.0393         | 44.5233         | 1  | S      | 13 |                 |                 |
|         | 203.0662        | 102.0368        | 2  | D      | 12 | 1477.4954       | 739.2513        |
|         | 370.0646        | 185.5359        | 3  | S[167] | 11 | 1362.4684       | 681.7379        |
|         | 457.0966        | 229.0520        | 4  | S      | 10 | 1195.4701       | 598.2387        |
|         | 514.1181        | 257.5627        | 5  | G      | 9  | 1108.4381       | 554.7227        |
|         | 601.1501        | 301.0787        | 6  | S      | 8  | 1051.4166       | 526.2119        |
|         | 782.1641        | 391.5857        | 7  | T[181] | 7  | 964.3846        | 482.6959        |
|         | 913.2046        | 457.1060        | 8  | M      | 6  | 783.3706        | 392.1889        |
|         | 1027.2476       | 514.1274        | 9  | N      | 5  | 652.3301        | 326.6687        |
|         | 1140.3316       | 570.6695        | 10 | L      | 4  | 538.2871        | 269.6472        |
|         | 1255.3586       | 628.1829        | 11 | D      | 3  | 425.2031        | 213.1052        |
|         | 1418.4219       | 709.7146        | 12 | Y      | 2  | 310.1761        | 155.5917        |
|         |                 |                 | 13 | K      | 1  | 147.1128        | 74.0600         |

# Annotated spectra from Saleem et. al. 2009

R.SDY<sub>243</sub>GGSR<sub>166</sub>DS<sub>167</sub>FQSSGR<sub>166</sub>.Y/2

0.9899

1e+04

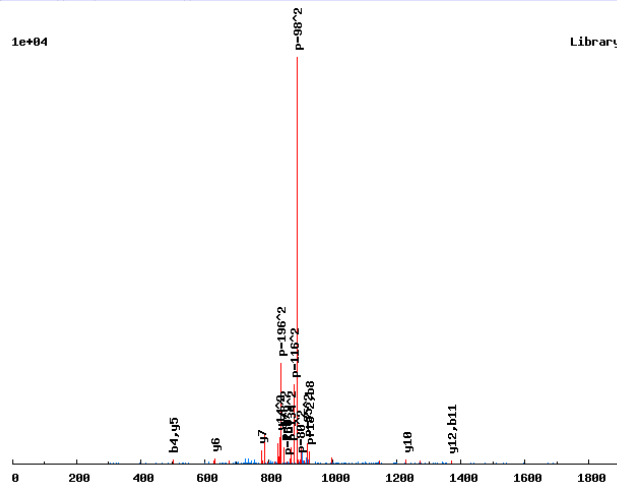

| Library | b <sup>1+</sup> | b <sup>2+</sup> | #  | AA     | #  | y <sup>1+</sup> | y <sup>2+</sup> |
|---------|-----------------|-----------------|----|--------|----|-----------------|-----------------|
|         | 88.0393         | 44.5233         | 1  | S      | 16 |                 |                 |
|         | 203.0662        | 102.0368        | 2  | D      | 15 | 1785.6380       | 893.3226        |
|         | 446.0959        | 223.5516        | 3  | Y[243] | 14 | 1670.6111       | 835.8092        |
|         | 503.1174        | 252.0623        | 4  | G      | 13 | 1427.5814       | 714.2943        |
|         | 560.1388        | 280.5731        | 5  | G      | 12 | 1370.5599       | 685.7836        |
|         | 647.1709        | 324.0891        | 6  | S      | 11 | 1313.5385       | 657.2729        |
|         | 813.2802        | 407.1438        | 7  | R[166] | 10 | 1226.5064       | 613.7569        |
|         | 928.3072        | 464.6572        | 8  | D      | 9  | 1060.3971       | 530.7022        |
|         | 1095.3055       | 548.1564        | 9  | S[167] | 8  | 945.3701        | 473.1887        |
|         | 1242.3740       | 621.6906        | 10 | F      | 7  | 778.3718        | 389.6895        |
|         | 1370.4325       | 685.7199        | 11 | Q      | 6  | 631.3033        | 316.1553        |
|         | 1457.4646       | 729.2359        | 12 | S      | 5  | 503.2448        | 252.1260        |
|         | 1544.4966       | 772.7519        | 13 | S      | 4  | 416.2127        | 208.6100        |
|         | 1601.5181       | 801.2627        | 14 | G      | 3  | 329.1807        | 165.0940        |
|         | 1688.5501       | 844.7787        | 15 | S      | 2  | 272.1592        | 136.5833        |
|         |                 |                 | 16 | R[166] | 1  | 185.1272        | 93.0672         |

# Annotated spectra from Saleem et. al. 2009

K.S<sub>167</sub>DYQIFQSTNNIR<sub>166</sub>-N/3

0.7645

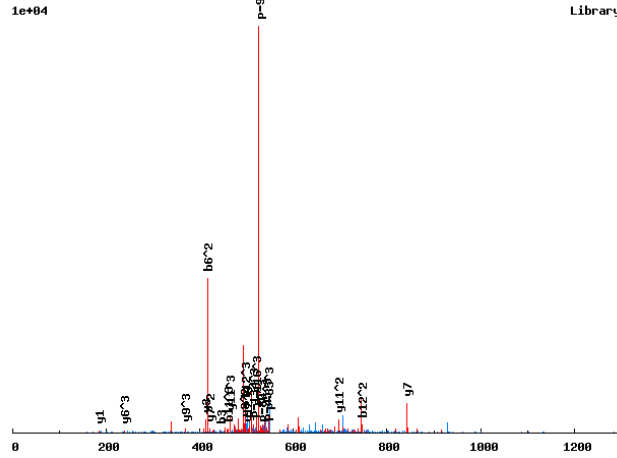

| Library | b <sup>1+</sup> | b <sup>2+</sup> | b <sup>3+</sup> | #  | AA     | #  | y <sup>1+</sup> | y <sup>2+</sup> | y <sup>3+</sup> |
|---------|-----------------|-----------------|-----------------|----|--------|----|-----------------|-----------------|-----------------|
|         | 168.0056        | 84.5065         | 56.6734         | 1  | S[167] | 13 |                 |                 |                 |
|         | 283.0326        | 142.0199        | 95.0157         | 2  | D      | 12 | 1508.7367       | 754.8720        | 503.5838        |
|         | 446.0959        | 223.5516        | 149.3702        | 3  | Y      | 11 | 1393.7098       | 697.3585        | 465.2415        |
|         | 574.1545        | 287.5809        | 192.0564        | 4  | Q      | 10 | 1230.6465       | 615.8269        | 410.8870        |
|         | 687.2386        | 344.1229        | 229.7510        | 5  | I      | 9  | 1102.5879       | 551.7976        | 368.2008        |
|         | 834.3070        | 417.6571        | 278.7738        | 6  | F      | 8  | 989.5038        | 495.2556        | 330.5061        |
|         | 962.3655        | 481.6864        | 321.4600        | 7  | Q      | 7  | 842.4354        | 421.7214        | 281.4833        |
|         | 1049.3976       | 525.2024        | 350.4707        | 8  | S      | 6  | 714.3768        | 357.6921        | 238.7971        |
|         | 1150.4453       | 575.7263        | 384.1533        | 9  | T      | 5  | 627.3448        | 314.1760        | 209.7865        |
|         | 1264.4882       | 632.7477        | 422.1676        | 10 | N      | 4  | 526.2971        | 263.6522        | 176.1039        |
|         | 1378.5311       | 689.7692        | 460.1819        | 11 | N      | 3  | 412.2542        | 206.6307        | 138.0896        |
|         | 1491.6152       | 746.3112        | 497.8766        | 12 | I      | 2  | 298.2113        | 149.6093        | 100.0753        |
|         |                 |                 |                 | 13 | R[166] | 1  | 185.1272        | 93.0672         | 62.3806         |

# Annotated spectra from Saleem et. al. 2009

K.SEAHVHT<sub>181</sub>S<sub>167</sub>EEDIDESNNVNGK.R/3

0.9997

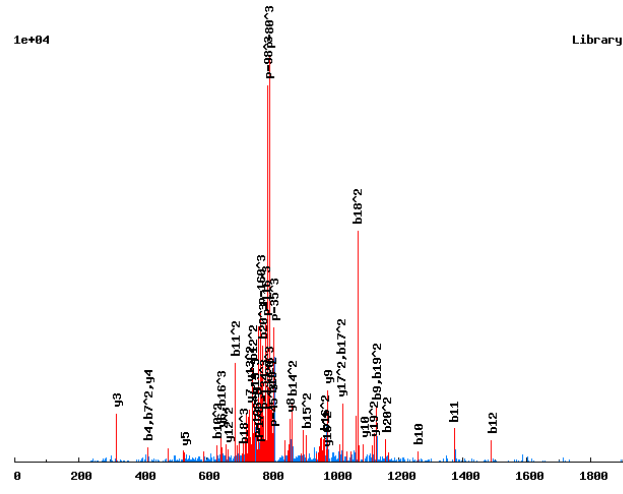

| Library | b <sup>1+</sup> | b <sup>2+</sup> | b <sup>3+</sup> | #  | AA     | #  | y <sup>1+</sup> | y <sup>2+</sup> | y <sup>3+</sup> |
|---------|-----------------|-----------------|-----------------|----|--------|----|-----------------|-----------------|-----------------|
|         | 88.0393         | 44.5233         | 30.0180         | 1  | S      | 21 |                 |                 |                 |
|         | 217.0819        | 109.0446        | 73.0322         | 2  | E      | 20 | 2375.8912       | 1188.4492       | 792.6352        |
|         | 288.1190        | 144.5631        | 96.7112         | 3  | A      | 19 | 2246.8486       | 1123.9279       | 749.6211        |
|         | 417.1616        | 209.0844        | 139.7254        | 4  | E      | 18 | 2175.8115       | 1088.4094       | 725.9420        |
|         | 516.2300        | 258.6186        | 172.7482        | 5  | V      | 17 | 2046.7689       | 1023.8881       | 682.9278        |
|         | 653.2889        | 327.1481        | 218.4345        | 6  | H      | 16 | 1947.7005       | 974.3539        | 649.9050        |
|         | 834.3029        | 417.6551        | 278.7725        | 7  | T[181] | 15 | 1810.6416       | 905.8244        | 604.2187        |
|         | 1001.3013       | 501.1543        | 334.4386        | 8  | S[167] | 14 | 1629.6276       | 815.3174        | 543.8807        |
|         | 1130.3439       | 565.6756        | 377.4528        | 9  | E      | 13 | 1462.6292       | 731.8182        | 488.2146        |
|         | 1259.3865       | 630.1969        | 420.4670        | 10 | E      | 12 | 1333.5866       | 667.2969        | 445.2004        |
|         | 1374.4134       | 687.7103        | 458.8093        | 11 | D      | 11 | 1204.5440       | 602.7756        | 402.1862        |
|         | 1487.4975       | 744.2524        | 496.5040        | 12 | I      | 10 | 1089.5171       | 545.2622        | 363.8439        |
|         | 1602.5244       | 801.7658        | 534.8463        | 13 | D      | 9  | 976.4330        | 488.7202        | 326.1492        |
|         | 1731.5670       | 866.2871        | 577.8605        | 14 | E      | 8  | 861.4061        | 431.2067        | 287.8069        |
|         | 1818.5990       | 909.8032        | 606.8712        | 15 | S      | 7  | 732.3635        | 366.6854        | 244.7927        |
|         | 1932.6420       | 966.8246        | 644.8855        | 16 | N      | 6  | 645.3315        | 323.1694        | 215.7820        |
|         | 2046.6849       | 1023.8461       | 682.8998        | 17 | N      | 5  | 531.2885        | 266.1479        | 177.7677        |
|         | 2145.7533       | 1073.3803       | 715.9226        | 18 | V      | 4  | 417.2456        | 209.1264        | 139.7534        |
|         | 2259.7962       | 1130.4018       | 753.9369        | 19 | N      | 3  | 318.1772        | 159.5922        | 106.7306        |
|         | 2316.8177       | 1158.9125       | 772.9441        | 20 | G      | 2  | 204.1343        | 102.5708        | 68.7163         |
|         |                 |                 |                 | 21 | K      | 1  | 147.1128        | 74.0600         | 49.7091         |



# Annotated spectra from Saleem et. al. 2009

R.SEDGNDR<sub>166</sub>MS<sub>167</sub>PLPS<sub>167</sub>PLNTILPINR<sub>166</sub>-L/3

0.8647

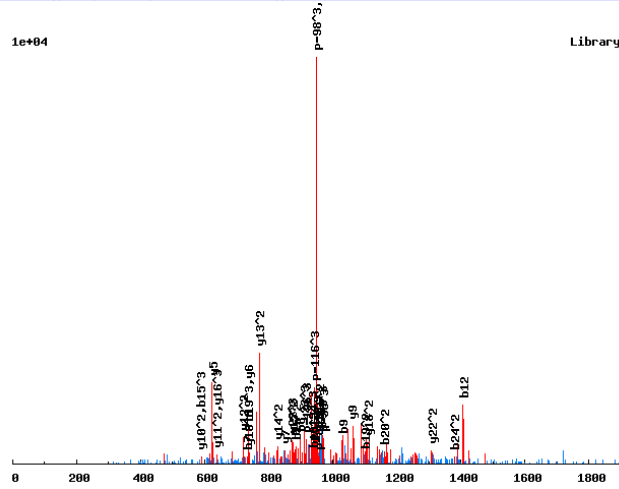

| Library | b <sup>1+</sup> | b <sup>2+</sup> | b <sup>3+</sup> | #  | AA     | #  | y <sup>1+</sup> | y <sup>2+</sup> | y <sup>3+</sup> |
|---------|-----------------|-----------------|-----------------|----|--------|----|-----------------|-----------------|-----------------|
|         | 88.0393         | 44.5233         | 30.0180         | 1  | S      | 25 |                 |                 |                 |
|         | 217.0819        | 109.0446        | 73.0322         | 2  | E      | 24 | 2857.2854       | 1429.1463       | 953.1000        |
|         | 332.1088        | 166.5581        | 111.3745        | 3  | D      | 23 | 2728.2428       | 1364.6251       | 910.0858        |
|         | 389.1303        | 195.0688        | 130.3816        | 4  | G      | 22 | 2613.2159       | 1307.1116       | 871.7435        |
|         | 503.1732        | 252.0903        | 168.3959        | 5  | N      | 21 | 2556.1944       | 1278.6008       | 852.7363        |
|         | 617.2162        | 309.1117        | 206.4102        | 6  | N      | 20 | 2442.1515       | 1221.5794       | 814.7220        |
|         | 732.2431        | 366.6252        | 244.7526        | 7  | D      | 19 | 2328.1086       | 1164.5579       | 776.7077        |
|         | 898.3525        | 449.6799        | 300.1223        | 8  | R[166] | 18 | 2213.0816       | 1107.0444       | 738.3654        |
|         | 1029.3930       | 515.2001        | 343.8025        | 9  | M      | 17 | 2046.9722       | 1023.9898       | 682.9956        |
|         | 1196.3913       | 598.6993        | 399.4686        | 10 | S[167] | 16 | 1915.9318       | 958.4695        | 639.3154        |
|         | 1293.4441       | 647.2257        | 431.8196        | 11 | P      | 15 | 1748.9334       | 874.9703        | 583.6493        |
|         | 1406.5282       | 703.7677        | 469.5142        | 12 | L      | 14 | 1651.8806       | 826.4440        | 551.2984        |
|         | 1503.5809       | 752.2941        | 501.8652        | 13 | P      | 13 | 1538.7966       | 769.9019        | 513.6037        |
|         | 1670.5793       | 835.7933        | 557.5313        | 14 | S[167] | 12 | 1441.7438       | 721.3755        | 481.2528        |
|         | 1767.6320       | 884.3197        | 589.8822        | 15 | P      | 11 | 1274.7454       | 637.8764        | 425.5867        |
|         | 1880.7161       | 940.8617        | 627.5769        | 16 | L      | 10 | 1177.6927       | 589.3500        | 393.2357        |
|         | 1994.7590       | 997.8832        | 665.5912        | 17 | N      | 9  | 1064.6086       | 532.8080        | 355.5411        |
|         | 2095.8067       | 1048.4070       | 699.2738        | 18 | T      | 8  | 950.5657        | 475.7865        | 317.5268        |
|         | 2208.8908       | 1104.9490       | 736.9684        | 19 | I      | 7  | 849.5180        | 425.2626        | 283.8442        |
|         | 2321.9748       | 1161.4911       | 774.6631        | 20 | L      | 6  | 736.4340        | 368.7206        | 246.1495        |
|         | 2419.0276       | 1210.0174       | 807.0140        | 21 | P      | 5  | 623.3499        | 312.1786        | 208.4548        |
|         | 2532.1116       | 1266.5595       | 844.7087        | 22 | I      | 4  | 526.2971        | 263.6522        | 176.1039        |
|         | 2646.1546       | 1323.5809       | 882.7230        | 23 | N      | 3  | 413.2131        | 207.1102        | 138.4092        |
|         | 2760.1975       | 1380.6024       | 920.7374        | 24 | N      | 2  | 299.1701        | 150.0887        | 100.3949        |
|         |                 |                 |                 | 25 | R[166] | 1  | 185.1272        | 93.0672         | 62.3806         |

# Annotated spectra from Saleem et. al. 2009

K<sub>1</sub>SEGET<sub>181</sub>S<sub>167</sub>EDEFDEK<sub>136</sub>NPAIVQTAR<sub>166</sub>S/3

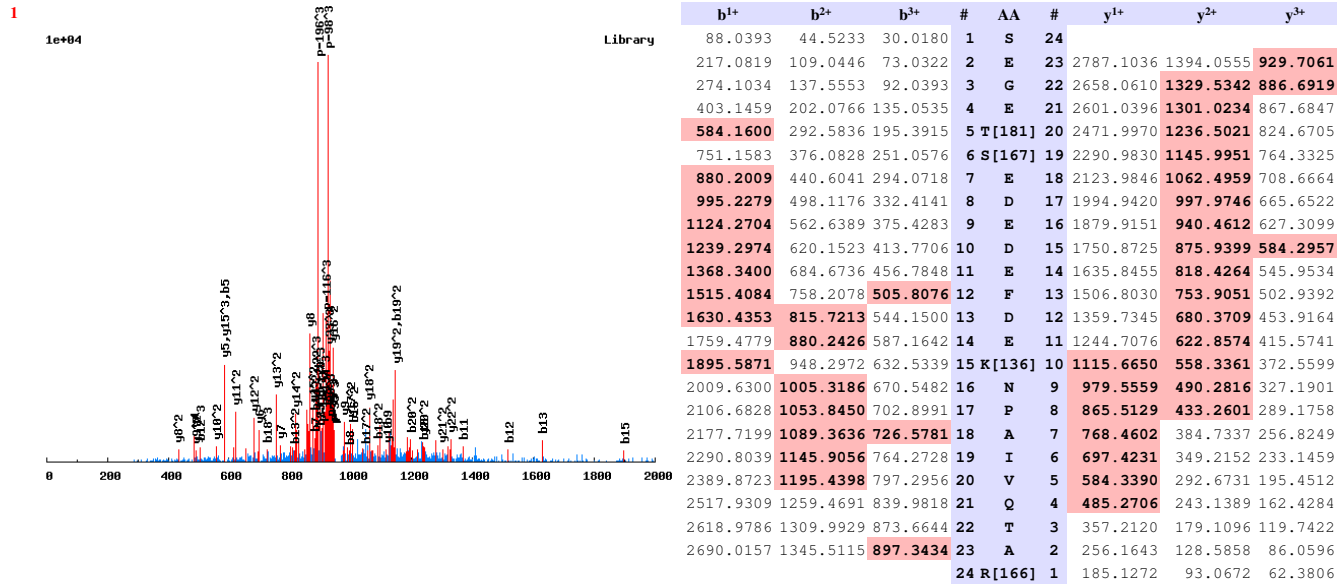

# Annotated spectra from Saleem et. al. 2009

K.SE<sub>16</sub>GSS<sub>16</sub>LVQK.G/2

0.992

1e+04

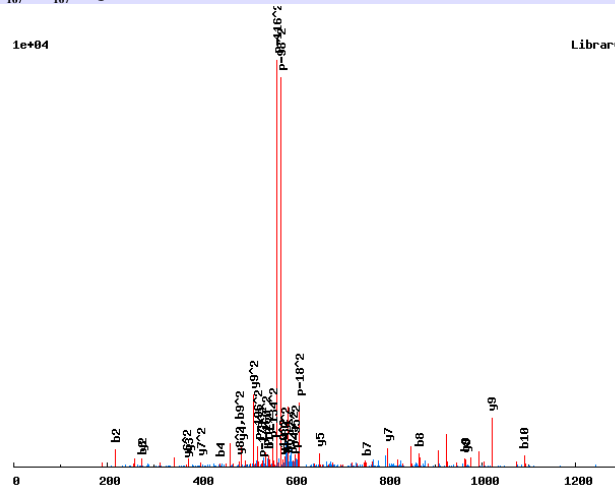

| Library | b <sup>1+</sup> | b <sup>2+</sup> | #  | AA      | #  | y <sup>1+</sup> | y <sup>2+</sup> |
|---------|-----------------|-----------------|----|---------|----|-----------------|-----------------|
|         | 88.0393         | 44.5233         | 1  | S       | 11 |                 |                 |
|         | 217.0819        | 109.0446        | 2  | E       | 10 | 1151.4381       | 576.2227        |
|         | 274.1034        | 137.5553        | 3  | G       | 9  | 1022.3955       | 511.7014        |
|         | 441.1017        | 221.0545        | 4  | S [167] | 8  | 965.3741        | 483.1907        |
|         | 498.1232        | 249.5652        | 5  | G       | 7  | 798.3757        | 399.6915        |
|         | 585.1552        | 293.0812        | 6  | S       | 6  | 741.3542        | 371.1808        |
|         | 752.1536        | 376.5804        | 7  | S [167] | 5  | 654.3222        | 327.6647        |
|         | 865.2376        | 433.1225        | 8  | L       | 4  | 487.3238        | 244.1656        |
|         | 964.3060        | 482.6567        | 9  | V       | 3  | 374.2398        | 187.6235        |
|         | 1092.3646       | 546.6860        | 10 | Q       | 2  | 275.1714        | 138.0893        |
|         |                 |                 | 11 | K       | 1  | 147.1128        | 74.0600         |

# Annotated spectra from Saleem et. al. 2009

K.SENNDQNDVDEES<sub>167</sub>EEKEIEQVK.S/3

0.9979

1e+04

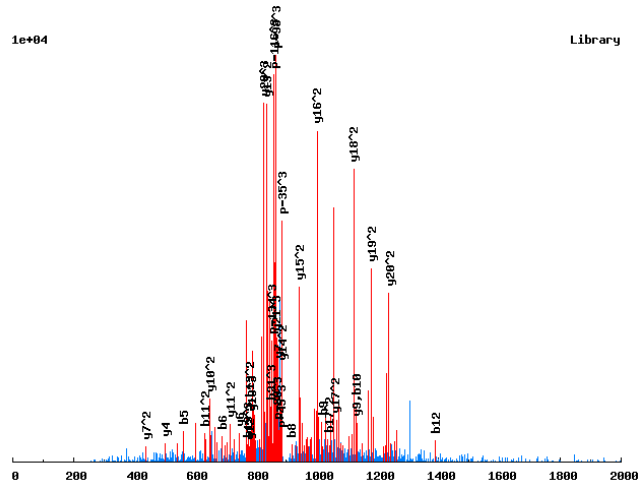

| Library | b <sup>1+</sup> | b <sup>2+</sup> | b <sup>3+</sup> | #  | AA     | #  | y <sup>1+</sup> | y <sup>2+</sup> | y <sup>3+</sup> |
|---------|-----------------|-----------------|-----------------|----|--------|----|-----------------|-----------------|-----------------|
|         | 88.0393         | 44.5233         | 30.0180         | 1  | S      | 22 |                 |                 |                 |
|         | 217.0819        | 109.0446        | 73.0322         | 2  | E      | 21 | 2600.0519       | 1300.5296       | 867.3555        |
|         | 331.1248        | 166.0661        | 111.0465        | 3  | N      | 20 | 2471.0093       | 1236.0083       | 824.3413        |
|         | 445.1678        | 223.0875        | 149.0608        | 4  | N      | 19 | 2356.9664       | 1178.9868       | 786.3270        |
|         | 560.1947        | 280.6010        | 187.4031        | 5  | D      | 18 | 2242.9235       | 1121.9654       | 748.3127        |
|         | 688.2533        | 344.6303        | 230.0893        | 6  | Q      | 17 | 2127.8965       | 1064.4519       | 709.9704        |
|         | 802.2962        | 401.6517        | 268.1036        | 7  | N      | 16 | 1999.8379       | 1000.4226       | 667.2842        |
|         | 917.3231        | 459.1652        | 306.4459        | 8  | D      | 15 | 1885.7950       | 943.4011        | 629.2699        |
|         | 1016.3916       | 508.6994        | 339.4687        | 9  | V      | 14 | 1770.7681       | 885.8877        | 590.9275        |
|         | 1131.4185       | 566.2129        | 377.8110        | 10 | D      | 13 | 1671.6997       | 836.3535        | 557.9047        |
|         | 1260.4611       | 630.7342        | 420.8252        | 11 | E      | 12 | 1556.6727       | 778.8400        | 519.5624        |
|         | 1389.5037       | 695.2555        | 463.8394        | 12 | E      | 11 | 1427.6301       | 714.3187        | 476.5482        |
|         | 1556.5020       | 778.7547        | 519.5055        | 13 | S[167] | 10 | 1298.5875       | 649.7974        | 433.5340        |
|         | 1685.5446       | 843.2760        | 562.5197        | 14 | E      | 9  | 1131.5892       | 566.2982        | 377.8679        |
|         | 1814.5872       | 907.7973        | 605.5339        | 15 | E      | 8  | 1002.5466       | 501.7769        | 334.8537        |
|         | 1942.6822       | 971.8447        | 648.2322        | 16 | K      | 7  | 873.5040        | 437.2556        | 291.8395        |
|         | 2071.7248       | 1036.3660       | 691.2464        | 17 | E      | 6  | 745.4090        | 373.2082        | 249.1412        |
|         | 2184.8088       | 1092.9081       | 728.9411        | 18 | I      | 5  | 616.3664        | 308.6869        | 206.1270        |
|         | 2313.8514       | 1157.4294       | 771.9553        | 19 | E      | 4  | 503.2824        | 252.1448        | 168.4323        |
|         | 2441.9100       | 1221.4586       | 814.6415        | 20 | Q      | 3  | 374.2398        | 187.6235        | 125.4181        |
|         | 2540.9784       | 1270.9928       | 847.6643        | 21 | V      | 2  | 246.1812        | 123.5942        | 82.7319         |
|         |                 |                 |                 | 22 | K      | 1  | 147.1128        | 74.0600         | 49.7091         |

Annotated spectra from Saleem et. al. 2009

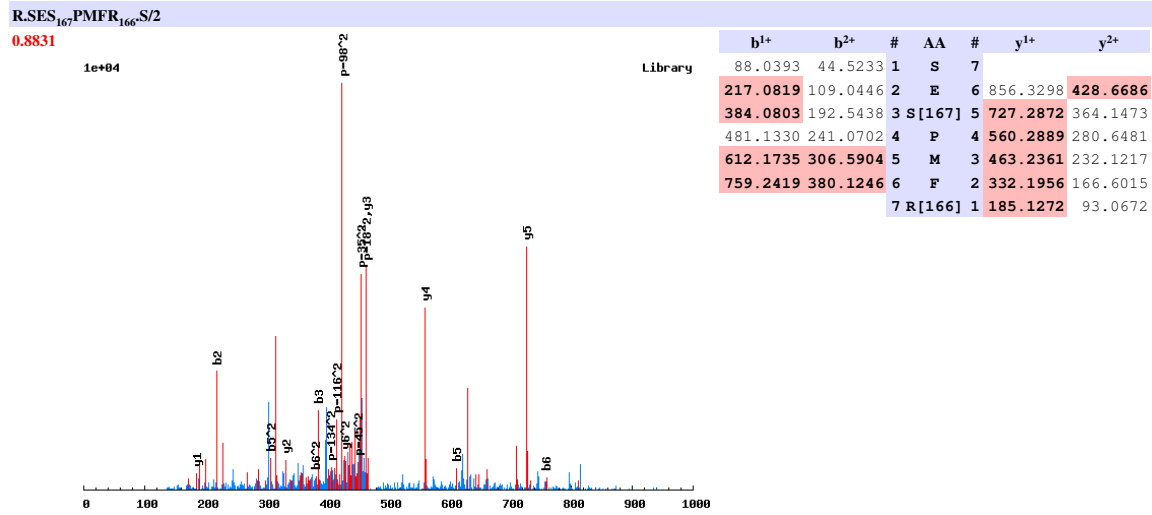

# Annotated spectra from Saleem et. al. 2009

R.SE<sub>ST</sub><sub>181</sub>EVDVDGNAIR.E/2

0.9974

1e+04

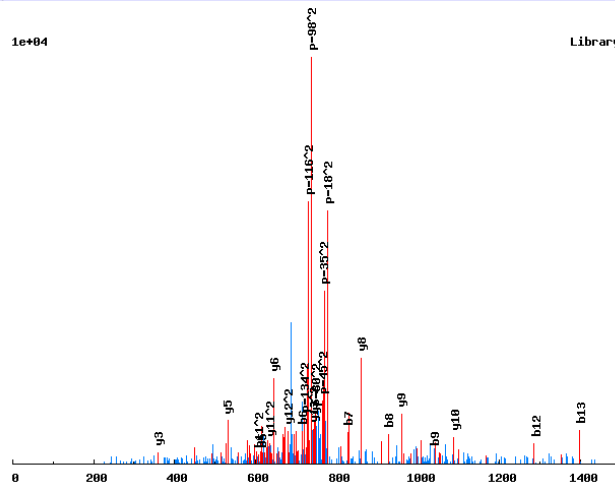

Library

|  | b <sup>1+</sup> | b <sup>2+</sup> | #  | AA      | #  | y <sup>1+</sup> | y <sup>2+</sup> |
|--|-----------------|-----------------|----|---------|----|-----------------|-----------------|
|  | 88.0393         | 44.5233         | 1  | S       | 14 |                 |                 |
|  | 217.0819        | 109.0446        | 2  | E       | 13 | 1484.6264       | 742.8169        |
|  | 304.1139        | 152.5606        | 3  | S       | 12 | 1355.5838       | 678.2956        |
|  | 485.1279        | 243.0676        | 4  | T [181] | 11 | 1268.5518       | 634.7795        |
|  | 614.1705        | 307.5889        | 5  | E       | 10 | 1087.5378       | 544.2725        |
|  | 713.2389        | 357.1231        | 6  | V       | 9  | 958.4952        | 479.7512        |
|  | 828.2659        | 414.6366        | 7  | D       | 8  | 859.4268        | 430.2170        |
|  | 927.3343        | 464.1708        | 8  | V       | 7  | 744.3999        | 372.7036        |
|  | 1042.3612       | 521.6843        | 9  | D       | 6  | 645.3315        | 323.1694        |
|  | 1099.3827       | 550.1950        | 10 | G       | 5  | 530.3045        | 265.6559        |
|  | 1213.4256       | 607.2165        | 11 | N       | 4  | 473.2830        | 237.1452        |
|  | 1284.4627       | 642.7350        | 12 | A       | 3  | 359.2401        | 180.1237        |
|  | 1397.5468       | 699.2770        | 13 | I       | 2  | 288.2030        | 144.6051        |
|  |                 |                 | 14 | R       | 1  | 175.1190        | 88.0631         |

# Annotated spectra from Saleem et. al. 2009

M.S.<sub>167</sub>ETELSK<sub>136</sub>EDAVTK<sub>136</sub>K<sub>136</sub>D/3

0.8055

1e+04

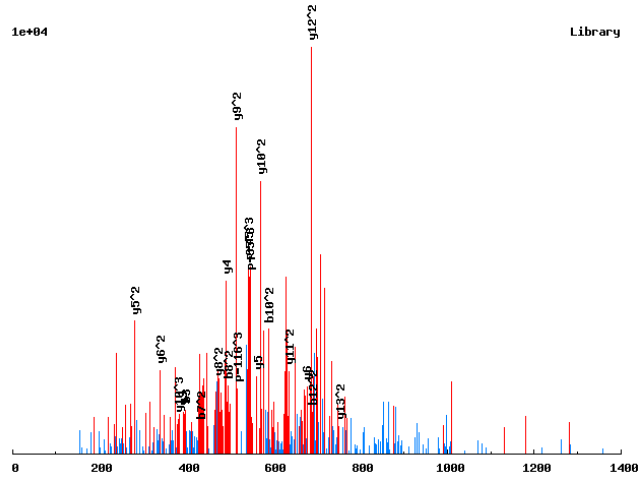

| Library | b <sup>1+</sup> | b <sup>2+</sup> | b <sup>3+</sup> | #  | AA     | #  | y <sup>1+</sup> | y <sup>2+</sup> | y <sup>3+</sup> |
|---------|-----------------|-----------------|-----------------|----|--------|----|-----------------|-----------------|-----------------|
|         | 168.0056        | 84.5065         | 56.6734         | 1  | S[167] | 14 |                 |                 |                 |
|         | 297.0482        | 149.0278        | 99.6876         | 2  | E      | 13 | 1501.8170       | 751.4121        | 501.2772        |
|         | 398.0959        | 199.5516        | 133.3702        | 3  | T      | 12 | 1372.7744       | 686.8908        | 458.2630        |
|         | 527.1385        | 264.0729        | 176.3844        | 4  | E      | 11 | 1271.7267       | 636.3670        | 424.5804        |
|         | 640.2226        | 320.6149        | 214.0790        | 5  | L      | 10 | 1142.6841       | 571.8457        | 381.5662        |
|         | 727.2546        | 364.1309        | 243.0897        | 6  | S      | 9  | 1029.6001       | 515.3037        | 343.8715        |
|         | 863.3637        | 432.1855        | 288.4594        | 7  | K[136] | 8  | 942.5680        | 471.7877        | 314.8609        |
|         | 992.4063        | 496.7068        | 331.4736        | 8  | E      | 7  | 806.4589        | 403.7331        | 269.4911        |
|         | 1107.4333       | 554.2203        | 369.8159        | 9  | D      | 6  | 677.4163        | 339.2118        | 226.4770        |
|         | 1178.4704       | 589.7388        | 393.4950        | 10 | A      | 5  | 562.3894        | 281.6983        | 188.1346        |
|         | 1277.5388       | 639.2730        | 426.5178        | 11 | V      | 4  | 491.3522        | 246.1798        | 164.4556        |
|         | 1378.5865       | 689.7969        | 460.2003        | 12 | T      | 3  | 392.2838        | 196.6456        | 131.4328        |
|         | 1514.6956       | 757.8515        | 505.5701        | 13 | K[136] | 2  | 291.2362        | 146.1217        | 97.7502         |
|         |                 |                 |                 | 14 | K[136] | 1  | 155.1270        | 78.0671         | 52.3805         |

# Annotated spectra from Saleem et. al. 2009

M.S<sub>167</sub>FDDLHK.A/2

0.6844

1e+04

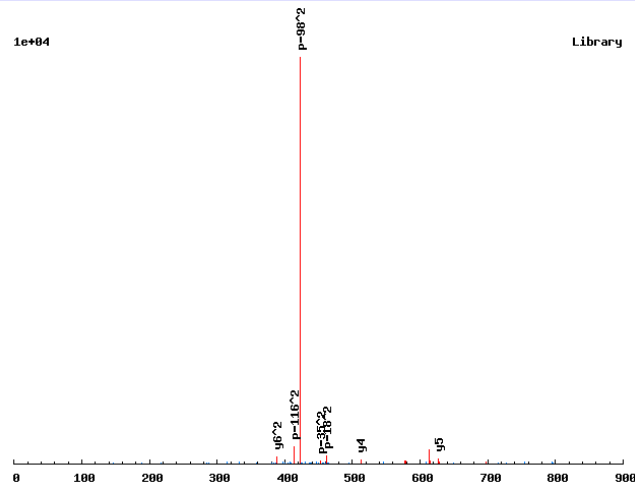

| Library | b <sup>1+</sup> | b <sup>2+</sup> | # | AA | #     | y <sup>1+</sup> | y <sup>2+</sup> |
|---------|-----------------|-----------------|---|----|-------|-----------------|-----------------|
|         | 168.0056        | 84.5065         | 1 | S  | [167] | 7               |                 |
|         | 315.0741        | 158.0407        | 2 | F  | 6     | 774.3781        | 387.6927        |
|         | 430.1010        | 215.5541        | 3 | D  | 5     | 627.3097        | 314.1585        |
|         | 545.1279        | 273.0676        | 4 | D  | 4     | 512.2827        | 256.6450        |
|         | 658.2120        | 329.6096        | 5 | L  | 3     | 397.2558        | 199.1315        |
|         | 795.2709        | 398.1391        | 6 | H  | 2     | 284.1717        | 142.5895        |
|         |                 |                 | 7 | K  | 1     | 147.1128        | 74.0600         |



# Annotated spectra from Saleem et. al. 2009

R.S<sub>167</sub>FDVPPPIDASSPFSQK.G/2

0.9995

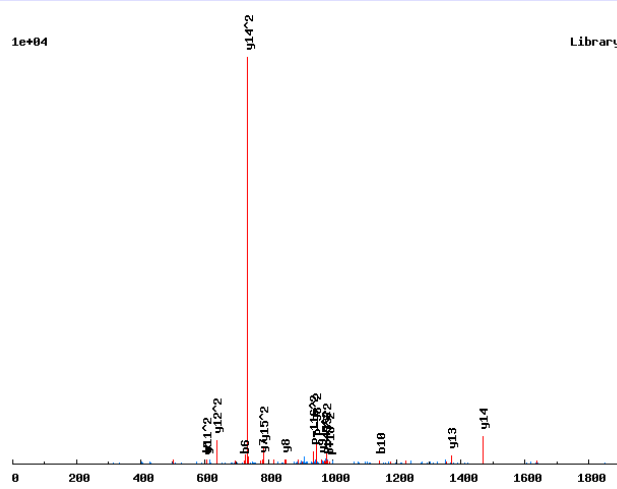

| Library | b <sup>1+</sup> | b <sup>2+</sup> | #  | AA | #     | y <sup>1+</sup> | y <sup>2+</sup> |
|---------|-----------------|-----------------|----|----|-------|-----------------|-----------------|
|         | 168.0056        | 84.5065         | 1  | S  | [167] | 18              |                 |
|         | 315.0741        | 158.0407        | 2  | F  | 17    | 1828.9116       | 914.9594        |
|         | 430.1010        | 215.5541        | 3  | D  | 16    | 1681.8431       | 841.4252        |
|         | 529.1694        | 265.0883        | 4  | V  | 15    | 1566.8162       | 783.9117        |
|         | 626.2222        | 313.6147        | 5  | P  | 14    | 1467.7478       | 734.3775        |
|         | 723.2749        | 362.1411        | 6  | P  | 13    | 1370.6950       | 685.8512        |
|         | 820.3277        | 410.6675        | 7  | P  | 12    | 1273.6423       | 637.3248        |
|         | 917.3804        | 459.1939        | 8  | P  | 11    | 1176.5895       | 588.7984        |
|         | 1030.4645       | 515.7359        | 9  | I  | 10    | 1079.5367       | 540.2720        |
|         | 1145.4914       | 573.2494        | 10 | D  | 9     | 966.4527        | 483.7300        |
|         | 1216.5286       | 608.7679        | 11 | A  | 8     | 851.4258        | 426.2165        |
|         | 1303.5606       | 652.2839        | 12 | S  | 7     | 780.3886        | 390.6980        |
|         | 1390.5926       | 695.7999        | 13 | S  | 6     | 693.3566        | 347.1819        |
|         | 1487.6454       | 744.3263        | 14 | P  | 5     | 606.3246        | 303.6659        |
|         | 1634.7138       | 817.8605        | 15 | F  | 4     | 509.2718        | 255.1395        |
|         | 1721.7458       | 861.3765        | 16 | S  | 3     | 362.2034        | 181.6053        |
|         | 1849.8044       | 925.4058        | 17 | Q  | 2     | 275.1714        | 138.0893        |
|         |                 |                 | 18 | K  | 1     | 147.1128        | 74.0600         |

# Annotated spectra from Saleem et. al. 2009

K.S<sub>167</sub>FESLK.R/2

0.9393

1e+04

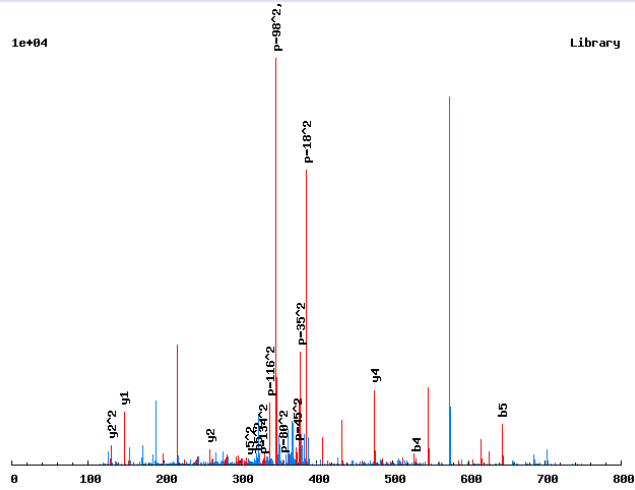

| Library | b <sup>1+</sup> | b <sup>2+</sup> | # | AA | #     | y <sup>1+</sup> | y <sup>2+</sup> |
|---------|-----------------|-----------------|---|----|-------|-----------------|-----------------|
|         | 168.0056        | 84.5065         | 1 | S  | [167] | 6               |                 |
|         | 315.0741        | 158.0407        | 2 | F  | 5     | 623.3399        | 312.1736        |
|         | 444.1166        | 222.5620        | 3 | E  | 4     | 476.2715        | 238.6394        |
|         | 531.1487        | 266.0780        | 4 | S  | 3     | 347.2289        | 174.1181        |
|         | 644.2327        | 322.6200        | 5 | L  | 2     | 260.1969        | 130.6021        |
|         |                 |                 | 6 | K  | 1     | 147.1128        | 74.0600         |



# Annotated spectra from Saleem et. al. 2009

R.S<sub>167</sub>FNVGSR.F/2

0.9828

1e+04

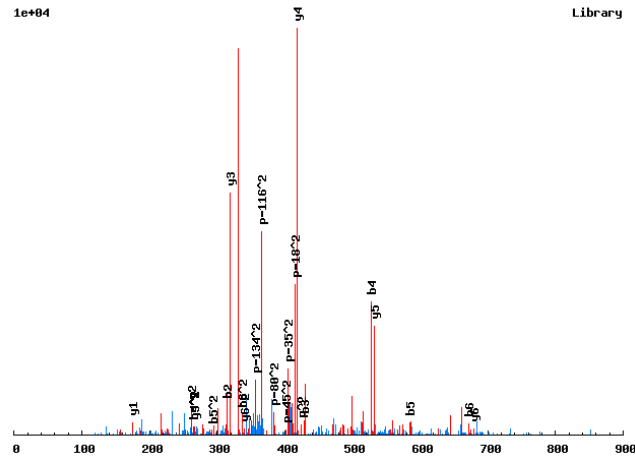

| Library | b <sup>1+</sup> | b <sup>2+</sup> | # | AA | #     | y <sup>1+</sup> | y <sup>2+</sup> |
|---------|-----------------|-----------------|---|----|-------|-----------------|-----------------|
|         | 168.0056        | 84.5065         | 1 | S  | [167] | 7               |                 |
|         | 315.0741        | 158.0407        | 2 | F  | 6     | 679.3522        | 340.1797        |
|         | 429.1170        | 215.0621        | 3 | N  | 5     | 532.2838        | 266.6455        |
|         | 528.1854        | 264.5963        | 4 | V  | 4     | 418.2408        | 209.6241        |
|         | 585.2069        | 293.1071        | 5 | G  | 3     | 319.1724        | 160.0899        |
|         | 672.2389        | 336.6231        | 6 | S  | 2     | 262.1510        | 131.5791        |
|         |                 |                 | 7 | R  | 1     | 175.1190        | 88.0631         |

# Annotated spectra from Saleem et. al. 2009

R.SFS<sub>167</sub>LHR<sub>166</sub>M/2

0.9884

1e+04

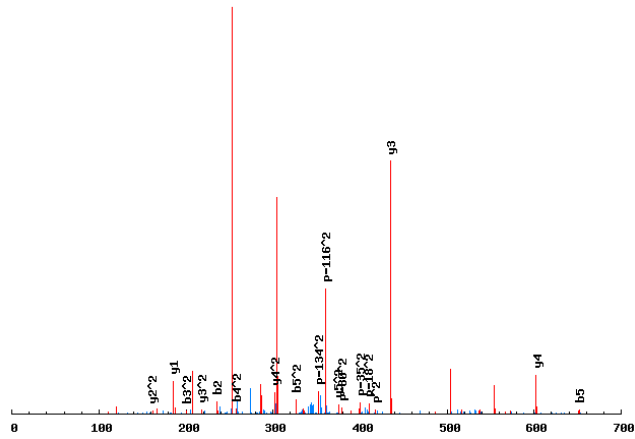

| Library | b <sup>1+</sup> | b <sup>2+</sup> | # | AA       | # | y <sup>1+</sup> | y <sup>2+</sup> |
|---------|-----------------|-----------------|---|----------|---|-----------------|-----------------|
|         | 88.0393         | 44.5233         | 1 | S        | 6 |                 |                 |
|         | 235.1077        | 118.0575        | 2 | F        | 5 | 749.3370        | 375.1721        |
|         | 402.1061        | 201.5567        | 3 | S[167]   | 4 | 602.2686        | 301.6379        |
|         | 515.1901        | 258.0987        | 4 | L        | 3 | 435.2702        | 218.1387        |
|         | 652.2491        | 326.6282        | 5 | H        | 2 | 322.1861        | 161.5967        |
|         |                 |                 |   |          |   |                 |                 |
|         |                 |                 |   | 6 R[166] | 1 | 185.1272        | 93.0672         |

# Annotated spectra from Saleem et. al. 2009

R.S<sub>167</sub>FS<sub>167</sub>LHR<sub>166</sub>M/2

0.898

1e+04

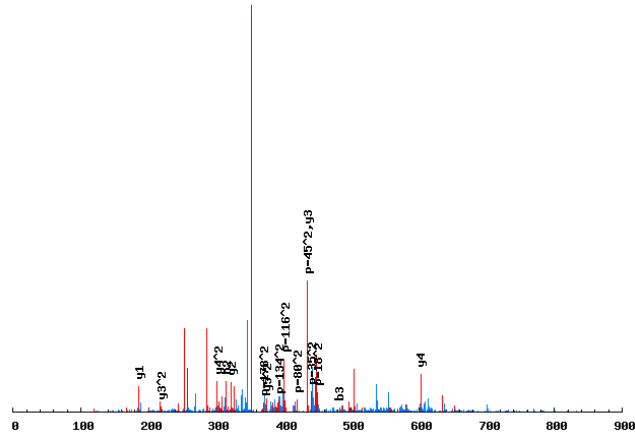

| Library | b <sup>1+</sup> | b <sup>2+</sup> | # | AA      | # | y <sup>1+</sup> | y <sup>2+</sup> |
|---------|-----------------|-----------------|---|---------|---|-----------------|-----------------|
|         | 168.0056        | 84.5065         | 1 | S [167] | 6 |                 |                 |
|         | 315.0741        | 158.0407        | 2 | F       | 5 | 749.3370        | 375.1721        |
|         | 482.0724        | 241.5398        | 3 | S [167] | 4 | 602.2686        | 301.6379        |
|         | 595.1565        | 298.0819        | 4 | L       | 3 | 435.2702        | 218.1387        |
|         | 732.2154        | 366.6113        | 5 | H       | 2 | 322.1861        | 161.5967        |
|         |                 |                 | 6 | R [166] | 1 | 185.1272        | 93.0672         |

Annotated spectra from Saleem et. al. 2009

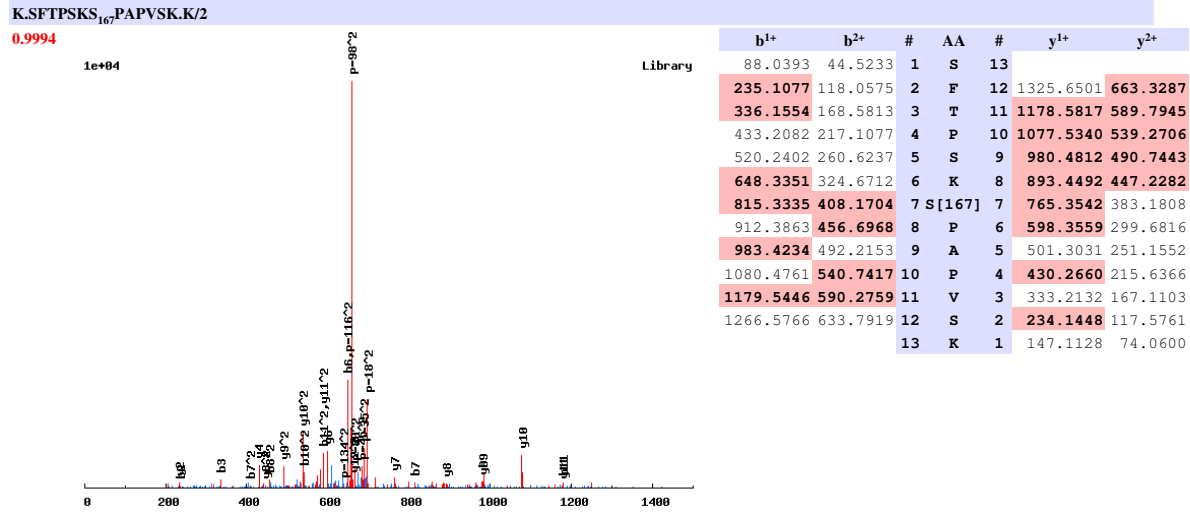

# Annotated spectra from Saleem et. al. 2009

K.SFVDENS<sub>167</sub>PTDR<sub>166</sub>R/2

0.9876

1e+04

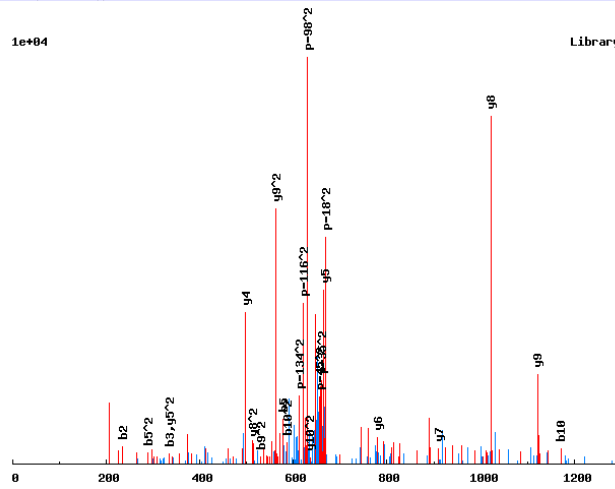

| Library | b <sup>1+</sup> | b <sup>2+</sup> | #  | AA     | #  | y <sup>1+</sup> | y <sup>2+</sup> |
|---------|-----------------|-----------------|----|--------|----|-----------------|-----------------|
|         | 88.0393         | 44.5233         | 1  | S      | 11 |                 |                 |
|         | 235.1077        | 118.0575        | 2  | F      | 10 | 1269.5022       | 635.2548        |
|         | 334.1761        | 167.5917        | 3  | V      | 9  | 1122.4338       | 561.7206        |
|         | 449.2031        | 225.1052        | 4  | D      | 8  | 1023.3654       | 512.1864        |
|         | 578.2457        | 289.6265        | 5  | E      | 7  | 908.3385        | 454.6729        |
|         | 692.2886        | 346.6479        | 6  | N      | 6  | 779.2959        | 390.1516        |
|         | 859.2870        | 430.1471        | 7  | S[167] | 5  | 665.2530        | 333.1301        |
|         | 956.3397        | 478.6735        | 8  | P      | 4  | 498.2546        | 249.6309        |
|         | 1057.3874       | 529.1973        | 9  | T      | 3  | 401.2018        | 201.1046        |
|         | 1172.4143       | 586.7108        | 10 | D      | 2  | 300.1542        | 150.5807        |
|         |                 |                 | 11 | R[166] | 1  | 185.1272        | 93.0672         |



# Annotated spectra from Saleem et. al. 2009

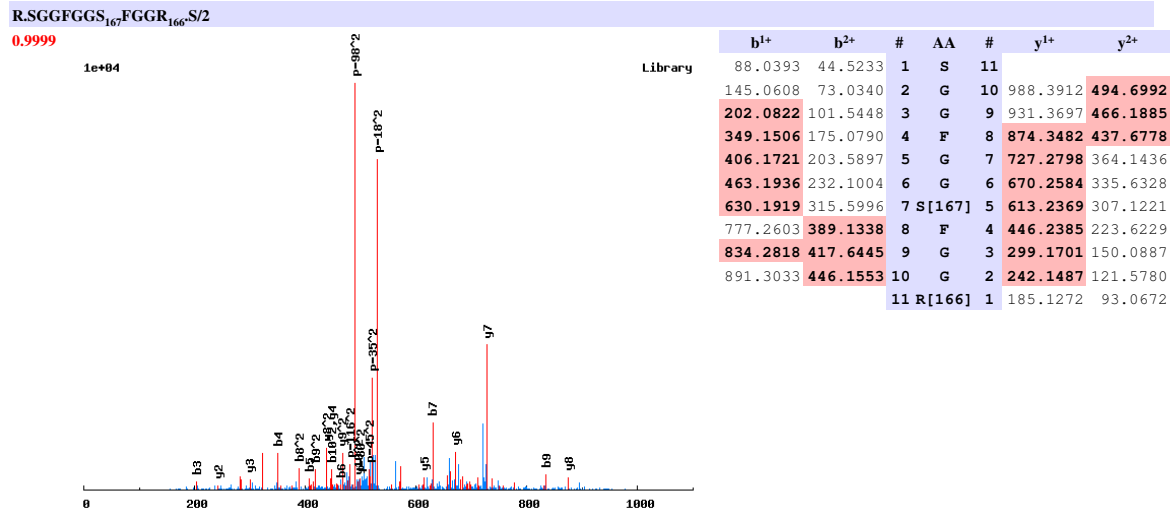

### Annotated spectra from Saleem et. al. 2009

K.SGHET<sub>181</sub>APVS<sub>167</sub>PVEDPLHASTALENETTIETVNP<sub>166</sub>SVR<sub>166</sub>S/3

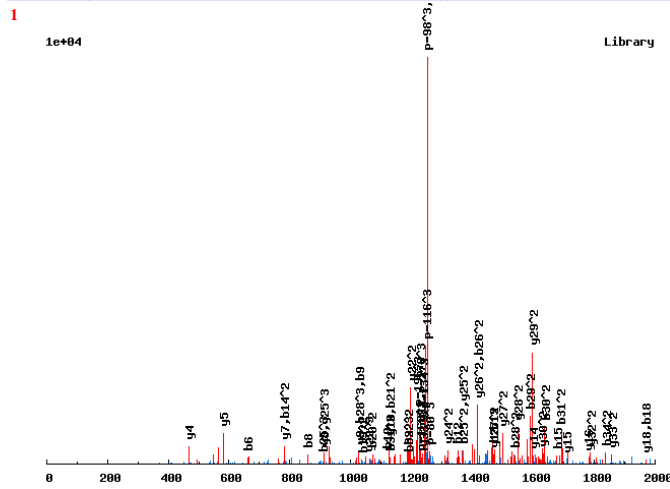

| Library | b <sup>1+</sup>  | b <sup>2+</sup> | b <sup>3+</sup> | #  | AA     | #  | y <sup>1+</sup> | y <sup>2+</sup>  | y <sup>3+</sup>  |
|---------|------------------|-----------------|-----------------|----|--------|----|-----------------|------------------|------------------|
|         | 88.0393          | 44.5233         | 30.0180         | 1  | S      | 35 |                 |                  |                  |
|         | 145.0608         | 73.0340         | 49.0251         | 2  | G      | 34 | 3767.7076       | 1884.3574        | 1256.5741        |
|         | 282.1197         | 141.5635        | 94.7114         | 3  | H      | 33 | 3710.6861       | <b>1855.8467</b> | <b>1237.5669</b> |
|         | 411.1623         | 206.0848        | 137.7256        | 4  | E      | 32 | 3573.6272       | <b>1787.3173</b> | 1191.8806        |
|         | 592.1763         | 296.5918        | 198.0636        | 5  | T[181] | 31 | 3444.5846       | 1722.7960        | 1148.8664        |
|         | <b>663.2134</b>  | 332.1103        | 221.7427        | 6  | A      | 30 | 3263.5706       | <b>1632.2889</b> | 1088.5284        |
|         | 760.2662         | 380.6367        | 254.0936        | 7  | P      | 29 | 3192.5335       | <b>1596.7704</b> | <b>1064.8494</b> |
|         | <b>859.3346</b>  | 430.1709        | 287.1164        | 8  | V      | 28 | 3095.4807       | <b>1548.2440</b> | 1032.4984        |
|         | <b>1026.3329</b> | 513.6701        | 342.7825        | 9  | S[167] | 27 | 2996.4123       | <b>1498.7098</b> | 999.4756         |
|         | <b>1123.3857</b> | 562.1965        | 375.1334        | 10 | P      | 26 | 2829.4140       | <b>1415.2106</b> | 943.8095</       |

# Annotated spectra from Saleem et. al. 2009

K.SGNISGDEY<sub>243</sub>LS<sub>167</sub>QEEVFDGNDIENNETK<sub>136</sub>V/3

0.9823

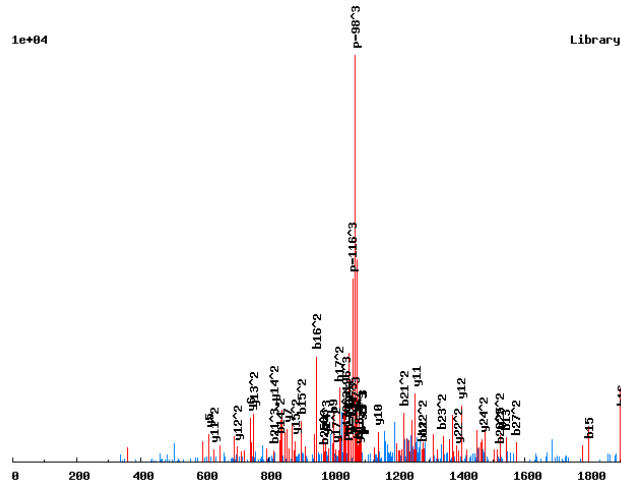

| Library | b <sup>1+</sup> | b <sup>2+</sup> | b <sup>3+</sup> | #  | AA     | #  | y <sup>1+</sup> | y <sup>2+</sup> | y <sup>3+</sup> |
|---------|-----------------|-----------------|-----------------|----|--------|----|-----------------|-----------------|-----------------|
|         | 88.0393         | 44.5233         | 30.0180         | 1  | S      | 28 |                 |                 |                 |
|         | 145.0608        | 73.0340         | 49.0251         | 2  | G      | 27 | 3213.2548       | 1607.1310       | 1071.7564       |
|         | 259.1037        | 130.0555        | 87.0394         | 3  | N      | 26 | 3156.2333       | 1578.6203       | 1052.7493       |
|         | 372.1878        | 186.5975        | 124.7341        | 4  | I      | 25 | 3042.1904       | 1521.5988       | 1014.7350       |
|         | 459.2198        | 230.1135        | 153.7448        | 5  | S      | 24 | 2929.1063       | 1465.0568       | 977.0403        |
|         | 516.2413        | 258.6243        | 172.7519        | 6  | G      | 23 | 2842.0743       | 1421.5408       | 948.0296        |
|         | 631.2682        | 316.1377        | 211.0943        | 7  | D      | 22 | 2785.0528       | 1393.0301       | 929.0225        |
|         | 760.3108        | 380.6590        | 254.1084        | 8  | E      | 21 | 2670.0259       | 1335.5166       | 890.6802        |
|         | 1003.3404       | 502.1739        | 335.1183        | 9  | Y[243] | 20 | 2540.9833       | 1270.9953       | 847.6660        |
|         | 1116.4245       | 558.7159        | 372.8130        | 10 | L      | 19 | 2297.9536       | 1149.4805       | 766.6561        |
|         | 1283.4229       | 642.2151        | 428.4791        | 11 | S[167] | 18 | 2184.8696       | 1092.9384       | 728.9614        |
|         | 1411.4814       | 706.2444        | 471.1653        | 12 | Q      | 17 | 2017.8712       | 1009.4392       | 673.2953        |
|         | 1540.5240       | 770.7657        | 514.1795        | 13 | E      | 16 | 1889.8126       | 945.4100        | 630.6091        |
|         | 1669.5666       | 835.2870        | 557.1937        | 14 | E      | 15 | 1760.7700       | 880.8887        | 587.5949        |
|         | 1798.6092       | 899.8082        | 600.2079        | 15 | E      | 14 | 1631.7275       | 816.3674        | 544.5807        |
|         | 1897.6776       | 949.3425        | 633.2307        | 16 | V      | 13 | 1502.6849       | 751.8461        | 501.5665        |
|         | 2044.7460       | 1022.8767       | 682.2535        | 17 | F      | 12 | 1403.6165       | 702.3119        | 468.5437        |
|         | 2159.7730       | 1080.3901       | 720.5958        | 18 | D      | 11 | 1256.5480       | 628.7777        | 419.5209        |
|         | 2216.7944       | 1108.9009       | 739.6030        | 19 | G      | 10 | 1141.5211       | 571.2642        | 381.1786        |
|         | 2330.8374       | 1165.9223       | 777.6173        | 20 | N      | 9  | 1084.4996       | 542.7535        | 362.1714        |
|         | 2445.8643       | 1223.4358       | 815.9596        | 21 | D      | 8  | 970.4567        | 485.7320        | 324.1571        |
|         | 2558.9484       | 1279.9778       | 853.6543        | 22 | I      | 7  | 855.4298        | 428.2185        | 285.8148        |
|         | 2687.9910       | 1344.4991       | 896.6685        | 23 | E      | 6  | 742.3457        | 371.6765        | 248.1201        |
|         | 2802.0339       | 1401.5206       | 934.6828        | 24 | N      | 5  | 613.3031        | 307.1552        | 205.1059        |
|         | 2916.0768       | 1458.5420       | 972.6971        | 25 | N      | 4  | 499.2602        | 250.1337        | 167.0916        |
|         | 3045.1194       | 1523.0633       | 1015.7113       | 26 | E      | 3  | 385.2173        | 193.1123        | 129.0773        |
|         | 3146.1671       | 1573.5872       | 1049.3939       | 27 | T      | 2  | 256.1747        | 128.5910        | 86.0631         |
|         |                 |                 |                 | 28 | K[136] | 1  | 155.1270        | 78.0671         | 52.3805         |

# Annotated spectra from Saleem et. al. 2009

K.SGNNWQDSS<sub>167</sub>VS<sub>167</sub>LPAK<sub>136</sub>A/2

0.9966

1e+04

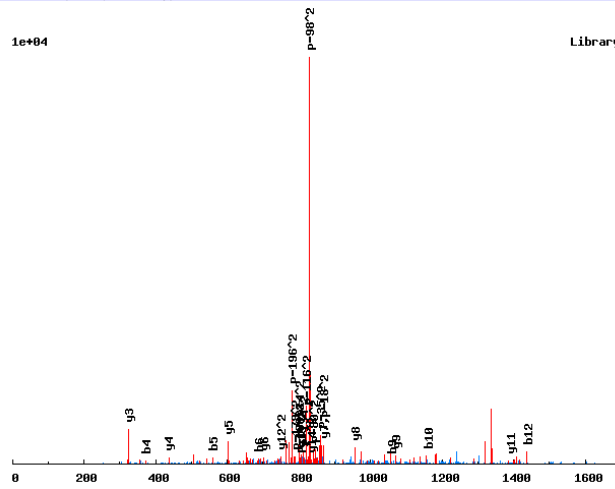

| Library | b <sup>1+</sup> | b <sup>2+</sup> | #  | AA     | #  | y <sup>1+</sup> | y <sup>2+</sup> |
|---------|-----------------|-----------------|----|--------|----|-----------------|-----------------|
|         | 88.0393         | 44.5233         | 1  | S      | 15 |                 |                 |
|         | 145.0608        | 73.0340         | 2  | G      | 14 | 1670.6702       | 835.8388        |
|         | 259.1037        | 130.0555        | 3  | N      | 13 | 1613.6488       | 807.3280        |
|         | 373.1466        | 187.0770        | 4  | N      | 12 | 1499.6059       | 750.3066        |
|         | 559.2259        | 280.1166        | 5  | W      | 11 | 1385.5629       | 693.2851        |
|         | 687.2845        | 344.1459        | 6  | Q      | 10 | 1199.4836       | 600.2454        |
|         | 802.3115        | 401.6594        | 7  | D      | 9  | 1071.4250       | 536.2162        |
|         | 889.3435        | 445.1754        | 8  | S      | 8  | 956.3981        | 478.7027        |
|         | 1056.3419       | 528.6746        | 9  | S[167] | 7  | 869.3661        | 435.1867        |
|         | 1155.4103       | 578.2088        | 10 | V      | 6  | 702.3677        | 351.6875        |
|         | 1322.4086       | 661.7080        | 11 | S[167] | 5  | 603.2993        | 302.1533        |
|         | 1435.4927       | 718.2500        | 12 | L      | 4  | 436.3009        | 218.6541        |
|         | 1532.5454       | 766.7764        | 13 | P      | 3  | 323.2169        | 162.1121        |
|         | 1603.5826       | 802.2949        | 14 | A      | 2  | 226.1641        | 113.5857        |
|         |                 |                 | 15 | K[136] | 1  | 155.1270        | 78.0671         |

# Annotated spectra from Saleem et. al. 2009

R.S<sub>167</sub>GSLR<sub>166</sub>S<sub>167</sub>IFSK<sub>136</sub>S/2

0.8475

1e+04

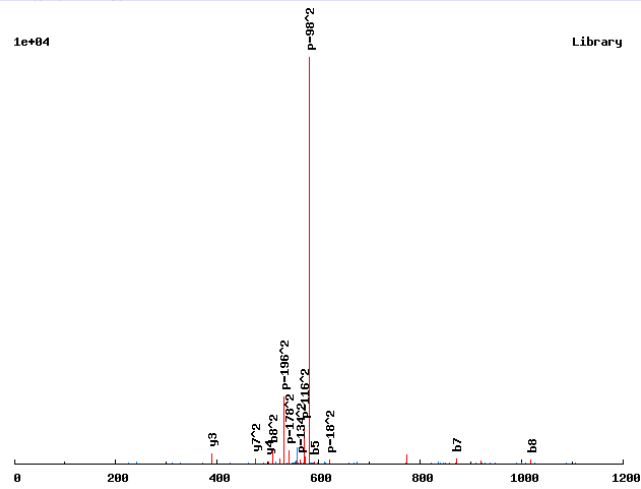

| Library | b <sup>1+</sup> | b <sup>2+</sup> | #  | AA | #     | y <sup>1+</sup> | y <sup>2+</sup>   |
|---------|-----------------|-----------------|----|----|-------|-----------------|-------------------|
|         | 168.0056        | 84.5065         | 1  | S  | [167] | 10              |                   |
|         | 225.0271        | 113.0172        | 2  | G  | 9     | 1092.5568       | 546.7820          |
|         | 312.0591        | 156.5332        | 3  | S  | 8     | 1035.5353       | 518.2713          |
|         | 425.1432        | 213.0752        | 4  | L  | 7     | 948.5033        | 474.7553          |
|         | 591.2526        | 296.1299        | 5  | R  | [166] | 6               | 835.4192 418.2133 |
|         | 758.2509        | 379.6291        | 6  | S  | [167] | 5               | 669.3099 335.1586 |
|         | 871.3350        | 436.1711        | 7  | I  | 4     | 502.3115        | 251.6594          |
|         | 1018.4034       | 509.7053        | 8  | F  | 3     | 389.2274        | 195.1174          |
|         | 1105.4354       | 553.2214        | 9  | S  | 2     | 242.1590        | 121.5832          |
|         |                 |                 | 10 | K  | [136] | 1               | 155.1270 78.0671  |

# Annotated spectra from Saleem et. al. 2009

R.S<sub>167</sub>GS<sub>167</sub>S<sub>167</sub>ASSSTTGS<sub>167</sub>NGK.N/3

0.8486

1e+04

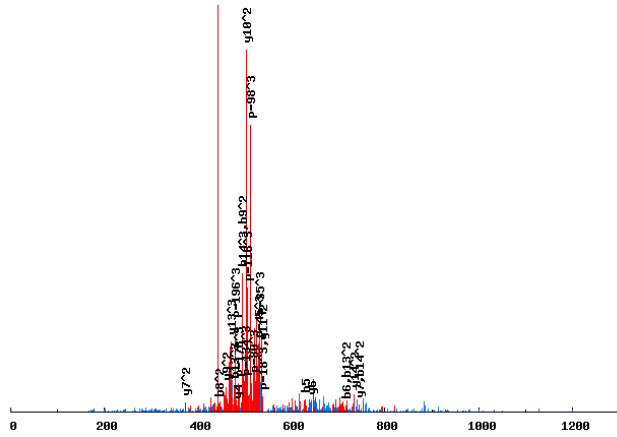

| Library | b <sup>1+</sup> | b <sup>2+</sup> | b <sup>3+</sup> | #  | AA | #     | y <sup>1+</sup> | y <sup>2+</sup> | y <sup>3+</sup> |          |
|---------|-----------------|-----------------|-----------------|----|----|-------|-----------------|-----------------|-----------------|----------|
|         | 168.0056        | 84.5065         | 56.6734         | 1  | S  | [167] | 15              |                 |                 |          |
|         | 225.0271        | 113.0172        | 75.6806         | 2  | G  | 14    | 1467.4438       | 734.2255        | 489.8194        |          |
|         | 392.0255        | 196.5164        | 131.3467        | 3  | S  | [167] | 13              | 1410.4223       | 705.7148        | 470.8123 |
|         | 559.0238        | 280.0156        | 187.0128        | 4  | S  | [167] | 12              | 1243.4239       | 622.2156        | 415.1462 |
|         | 630.0609        | 315.5341        | 210.6918        | 5  | A  | 11    | 1076.4256       | 538.7164        | 359.4800        |          |
|         | 717.0930        | 359.0501        | 239.7025        | 6  | S  | 10    | 1005.3885       | 503.1979        | 335.8010        |          |
|         | 804.1250        | 402.5661        | 268.7132        | 7  | S  | 9     | 918.3564        | 459.6819        | 306.7903        |          |
|         | 891.1570        | 446.0822        | 297.7239        | 8  | S  | 8     | 831.3244        | 416.1658        | 277.7797        |          |
|         | 992.2047        | 496.6060        | 331.4064        | 9  | T  | 7     | 744.2924        | 372.6498        | 248.7690        |          |
|         | 1093.2524       | 547.1298        | 365.0890        | 10 | T  | 6     | 643.2447        | 322.1260        | 215.0864        |          |
|         | 1150.2738       | 575.6406        | 384.0961        | 11 | G  | 5     | 542.1970        | 271.6021        | 181.4039        |          |
|         | 1317.2722       | 659.1397        | 439.7623        | 12 | S  | [167] | 4               | 485.1756        | 243.0914        | 162.3967 |
|         | 1431.3151       | 716.1612        | 477.7766        | 13 | N  | 3     | 318.1772        | 159.5922        | 106.7306        |          |
|         | 1488.3366       | 744.6719        | 496.7837        | 14 | G  | 2     | 204.1343        | 102.5708        | 68.7163         |          |
|         |                 |                 |                 | 15 | K  | 1     | 147.1128        | 74.0600         | 49.7091         |          |

# Annotated spectra from Saleem et. al. 2009

R.S<sub>167</sub>GS<sub>167</sub>S<sub>167</sub>DGS<sub>167</sub>S<sub>167</sub>GKDR.N/3

0.5816

1e+04

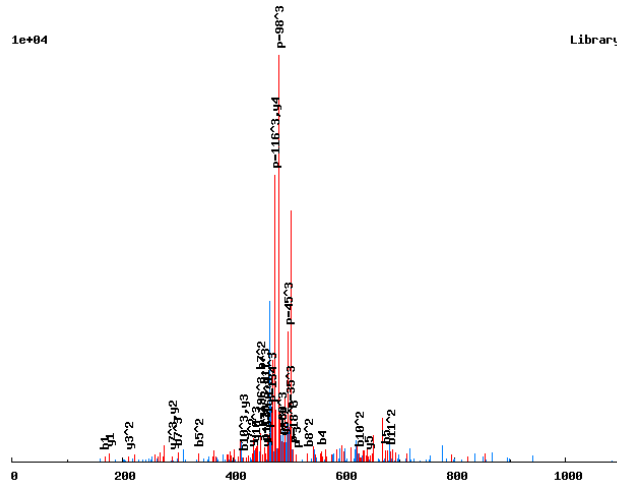

| Library | b <sup>1+</sup> | b <sup>2+</sup> | b <sup>3+</sup> | #  | AA     | #  | y <sup>1+</sup> | y <sup>2+</sup> | y <sup>3+</sup> |
|---------|-----------------|-----------------|-----------------|----|--------|----|-----------------|-----------------|-----------------|
|         | 168.0056        | 84.5065         | 56.6734         | 1  | S[167] | 12 |                 |                 |                 |
|         | 225.0271        | 113.0172        | 75.6806         | 2  | G      | 11 | 1372.3256       | 686.6664        | 458.1134        |
|         | 392.0255        | 196.5164        | 131.3467        | 3  | S[167] | 10 | 1315.3042       | 658.1557        | 439.1062        |
|         | 559.0238        | 280.0156        | 187.0128        | 4  | S[167] | 9  | 1148.3058       | 574.6565        | 383.4401        |
|         | 674.0508        | 337.5290        | 225.3551        | 5  | D      | 8  | 981.3074        | 491.1574        | 327.7740        |
|         | 731.0722        | 366.0398        | 244.3623        | 6  | G      | 7  | 866.2805        | 433.6439        | 289.4317        |
|         | 898.0706        | 449.5389        | 300.0284        | 7  | S[167] | 6  | 809.2590        | 405.1332        | 270.4245        |
|         | 1065.0689       | 533.0381        | 355.6945        | 8  | S[167] | 5  | 642.2607        | 321.6340        | 214.7584        |
|         | 1122.0904       | 561.5488        | 374.7017        | 9  | G      | 4  | 475.2623        | 238.1348        | 159.0923        |
|         | 1250.1854       | 625.5963        | 417.4000        | 10 | K      | 3  | 418.2408        | 209.6241        | 140.0851        |
|         | 1365.2123       | 683.1098        | 455.7423        | 11 | D      | 2  | 290.1459        | 145.5766        | 97.3868         |
|         |                 |                 |                 | 12 | R      | 1  | 175.1190        | 88.0631         | 59.0445         |

# Annotated spectra from Saleem et. al. 2009

R.S<sub>167</sub>GSSGS<sub>167</sub>STVIEPSNIK<sub>136</sub>L/2

0.9929

1e+04

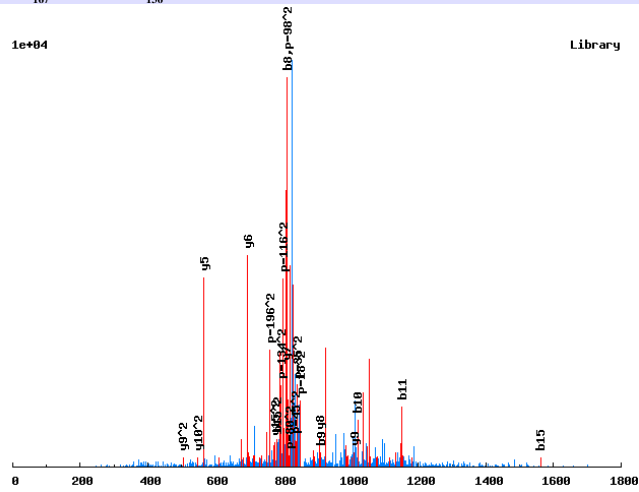

| Library | b <sup>1+</sup> | b <sup>2+</sup> | #  | AA | #     | y <sup>1+</sup> | y <sup>2+</sup> |          |
|---------|-----------------|-----------------|----|----|-------|-----------------|-----------------|----------|
|         | 168.0056        | 84.5065         | 1  | S  | [167] | 16              |                 |          |
|         | 225.0271        | 113.0172        | 2  | G  | 15    | 1550.7189       | 775.8631        |          |
|         | 312.0591        | 156.5332        | 3  | S  | 14    | 1493.6974       | 747.3524        |          |
|         | 399.0912        | 200.0492        | 4  | S  | 13    | 1406.6654       | 703.8363        |          |
|         | 456.1126        | 228.5600        | 5  | G  | 12    | 1319.6334       | 660.3203        |          |
|         | 623.1110        | 312.0591        | 6  | S  | [167] | 11              | 1262.6119       | 631.8096 |
|         | 710.1430        | 355.5751        | 7  | S  | 10    | 1095.6135       | 548.3104        |          |
|         | 811.1907        | 406.0990        | 8  | T  | 9     | 1008.5815       | 504.7944        |          |
|         | 910.2591        | 455.6332        | 9  | V  | 8     | 907.5338        | 454.2706        |          |
|         | 1023.3432       | 512.1752        | 10 | I  | 7     | 808.4654        | 404.7364        |          |
|         | 1152.3858       | 576.6965        | 11 | E  | 6     | 695.3814        | 348.1943        |          |
|         | 1249.4385       | 625.2229        | 12 | P  | 5     | 566.3388        | 283.6730        |          |
|         | 1336.4705       | 668.7389        | 13 | S  | 4     | 469.2860        | 235.1466        |          |
|         | 1450.5135       | 725.7604        | 14 | N  | 3     | 382.2540        | 191.6306        |          |
|         | 1563.5975       | 782.3024        | 15 | I  | 2     | 268.2111        | 134.6092        |          |
|         |                 |                 | 16 | K  | [136] | 1               | 155.1270        | 78.0671  |



# Annotated spectra from Saleem et. al. 2009

R.S<sub>167</sub>GSS<sub>167</sub>TDVLSGGIDSMK.N/2

0.9999

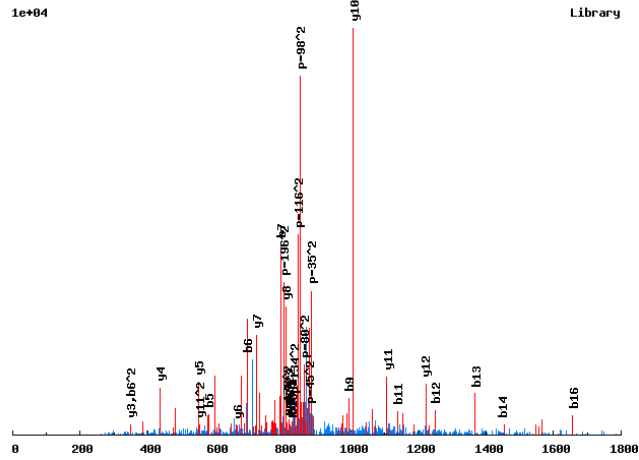

| Library | b <sup>1+</sup> | b <sup>2+</sup> | #  | AA | #     | y <sup>1+</sup> | y <sup>2+</sup>    |
|---------|-----------------|-----------------|----|----|-------|-----------------|--------------------|
|         | 168.0056        | 84.5065         | 1  | S  | [167] | 17              |                    |
|         | 225.0271        | 113.0172        | 2  | G  | 16    | 1634.6979       | 817.8526           |
|         | 312.0591        | 156.5332        | 3  | S  | 15    | 1577.6764       | 789.3419           |
|         | 479.0575        | 240.0324        | 4  | S  | [167] | 14              | 1490.6444 745.8258 |
|         | 580.1052        | 290.5562        | 5  | T  | 13    | 1323.6460       | 662.3267           |
|         | 695.1321        | 348.0697        | 6  | D  | 12    | 1222.5984       | 611.8028           |
|         | 794.2005        | 397.6039        | 7  | V  | 11    | 1107.5714       | 554.2893           |
|         | 907.2846        | 454.1459        | 8  | L  | 10    | 1008.5030       | 504.7551           |
|         | 994.3166        | 497.6619        | 9  | S  | 9     | 895.4189        | 448.2131           |
|         | 1081.3486       | 541.1780        | 10 | S  | 8     | 808.3869        | 404.6971           |
|         | 1138.3701       | 569.6887        | 11 | G  | 7     | 721.3549        | 361.1811           |
|         | 1251.4542       | 626.2307        | 12 | I  | 6     | 664.3334        | 332.6704           |
|         | 1366.4811       | 683.7442        | 13 | D  | 5     | 551.2494        | 276.1283           |
|         | 1453.5131       | 727.2602        | 14 | S  | 4     | 436.2224        | 218.6149           |
|         | 1584.5536       | 792.7805        | 15 | M  | 3     | 349.1904        | 175.0988           |
|         | 1655.5907       | 828.2990        | 16 | A  | 2     | 218.1499        | 109.5786           |
|         |                 |                 | 17 | K  | 1     | 147.1128        | 74.0600            |

# Annotated spectra from Saleem et. al. 2009

K.SGST<sub>181</sub>NSLY<sub>243</sub>DLAQPSLSSATPQQK.N/3

0.9459

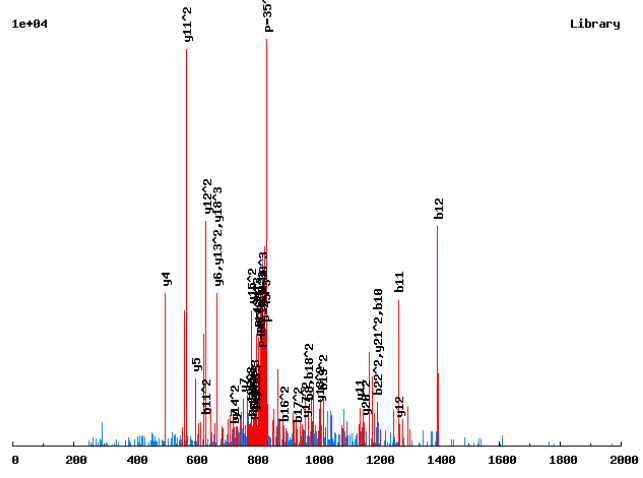

| Library | b <sup>1+</sup> | b <sup>2+</sup> | b <sup>3+</sup> | #  | AA     | #  | y <sup>1+</sup> | y <sup>2+</sup> | y <sup>3+</sup> |
|---------|-----------------|-----------------|-----------------|----|--------|----|-----------------|-----------------|-----------------|
|         | 88.0393         | 44.5233         | 30.0180         | 1  | S      | 23 |                 |                 |                 |
|         | 145.0608        | 73.0340         | 49.0251         | 2  | G      | 22 | 2453.0633       | 1227.0353       | 818.3593        |
|         | 232.0928        | 116.5500        | 78.0358         | 3  | S      | 21 | 2396.0418       | 1198.5246       | 799.3521        |
|         | 413.1068        | 207.0570        | 138.3738        | 4  | T[181] | 20 | 2309.0098       | 1155.0085       | 770.3415        |
|         | 527.1497        | 264.0785        | 176.3881        | 5  | N      | 19 | 2127.9958       | 1064.5015       | 710.0035        |
|         | 614.1818        | 307.5945        | 205.3988        | 6  | S      | 18 | 2013.9529       | 1007.4801       | 671.9891        |
|         | 727.2658        | 364.1366        | 243.0935        | 7  | L      | 17 | 1926.9208       | 963.9641        | 642.9785        |
|         | 970.2955        | 485.6514        | 324.1034        | 8  | Y[243] | 16 | 1813.8368       | 907.4220        | 605.2838        |
|         | 1085.3224       | 543.1649        | 362.4457        | 9  | D      | 15 | 1570.8071       | 785.9072        | 524.2739        |
|         | 1198.4065       | 599.7069        | 400.1404        | 10 | L      | 14 | 1455.7802       | 728.3937        | 485.9316        |
|         | 1269.4436       | 635.2254        | 423.8194        | 11 | A      | 13 | 1342.6961       | 671.8517        | 448.2369        |
|         | 1397.5022       | 699.2547        | 466.5056        | 12 | Q      | 12 | 1271.6590       | 636.3331        | 424.5579        |
|         | 1494.5549       | 747.7811        | 498.8565        | 13 | P      | 11 | 1143.6004       | 572.3039        | 381.8717        |
|         | 1581.5870       | 791.2971        | 527.8672        | 14 | S      | 10 | 1046.5477       | 523.7775        | 349.5207        |
|         | 1694.6710       | 847.8392        | 565.5619        | 15 | L      | 9  | 959.5156        | 480.2615        | 320.5101        |
|         | 1781.7031       | 891.3552        | 594.5725        | 16 | S      | 8  | 846.4316        | 423.7194        | 282.8154        |
|         | 1868.7351       | 934.8712        | 623.5832        | 17 | S      | 7  | 759.3995        | 380.2034        | 253.8047        |
|         | 1939.7722       | 970.3897        | 647.2623        | 18 | A      | 6  | 672.3675        | 336.6874        | 224.7940        |
|         | 2040.8199       | 1020.9136       | 680.9448        | 19 | T      | 5  | 601.3304        | 301.1688        | 201.1150        |
|         | 2137.8726       | 1069.4400       | 713.2957        | 20 | P      | 4  | 500.2827        | 250.6450        | 167.4324        |
|         | 2265.9312       | 1133.4693       | 755.9819        | 21 | Q      | 3  | 403.2300        | 202.1186        | 135.0815        |
|         | 2393.9898       | 1197.4985       | 798.6681        | 22 | Q      | 2  | 275.1714        | 138.0893        | 92.3953         |
|         |                 |                 |                 | 23 | K      | 1  | 147.1128        | 74.0600         | 49.7091         |

# Annotated spectra from Saleem et. al. 2009

R.SGT<sub>181</sub>GISMT<sub>181</sub>HDK.S/2

0.7133

1e+04

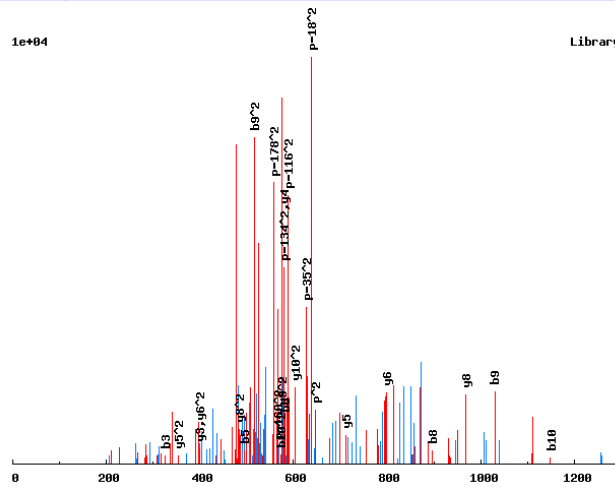

| Library | b <sup>1+</sup> | b <sup>2+</sup> | #  | AA     | #  | y <sup>1+</sup> | y <sup>2+</sup> |
|---------|-----------------|-----------------|----|--------|----|-----------------|-----------------|
|         | 88.0393         | 44.5233         | 1  | S      | 11 |                 |                 |
|         | 145.0608        | 73.0340         | 2  | G      | 10 | 1206.4262       | 603.7167        |
|         | 326.0748        | 163.5410        | 3  | T[181] | 9  | 1149.4047       | 575.2060        |
|         | 383.0962        | 192.0518        | 4  | G      | 8  | 968.3907        | 484.6990        |
|         | 496.1803        | 248.5938        | 5  | I      | 7  | 911.3692        | 456.1883        |
|         | 583.2123        | 292.1098        | 6  | S      | 6  | 798.2852        | 399.6462        |
|         | 714.2528        | 357.6301        | 7  | M      | 5  | 711.2532        | 356.1302        |
|         | 895.2668        | 448.1371        | 8  | T[181] | 4  | 580.2127        | 290.6100        |
|         | 1032.3257       | 516.6665        | 9  | H      | 3  | 399.1986        | 200.1030        |
|         | 1147.3527       | 574.1800        | 10 | D      | 2  | 262.1397        | 131.5735        |
|         |                 |                 | 11 | K      | 1  | 147.1128        | 74.0600         |

# Annotated spectra from Saleem et. al. 2009

K.SGT<sub>181</sub>PFEKEAT<sub>181</sub>PVLPANEAVK.D/3

0.9997

1e+04

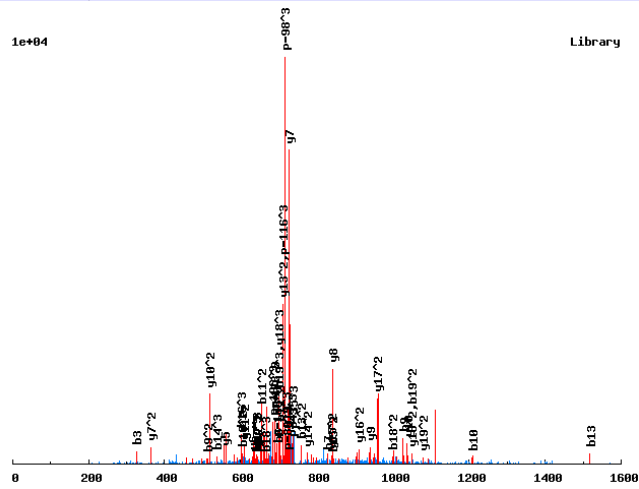

| Library | b <sup>1+</sup> | b <sup>2+</sup> | b <sup>3+</sup> | #  | AA     | #  | y <sup>1+</sup> | y <sup>2+</sup> | y <sup>3+</sup> |
|---------|-----------------|-----------------|-----------------|----|--------|----|-----------------|-----------------|-----------------|
|         | 88.0393         | 44.5233         | 30.0180         | 1  | S      | 20 |                 |                 |                 |
|         | 145.0608        | 73.0340         | 49.0251         | 2  | G      | 19 | 2157.9868       | 1079.4971       | 720.0005        |
|         | 326.0748        | 163.5410        | 109.3631        | 3  | T[181] | 18 | 2100.9654       | 1050.9863       | 700.9933        |
|         | 423.1275        | 212.0674        | 141.7140        | 4  | P      | 17 | 1919.9514       | 960.4793        | 640.6553        |
|         | 570.1960        | 285.6016        | 190.7368        | 5  | F      | 16 | 1822.8986       | 911.9529        | 608.3044        |
|         | 699.2385        | 350.1229        | 233.7510        | 6  | E      | 15 | 1675.8302       | 838.4187        | 559.2816        |
|         | 827.3335        | 414.1704        | 276.4494        | 7  | K      | 14 | 1546.7876       | 773.8974        | 516.2674        |
|         | 956.3761        | 478.6917        | 319.4636        | 8  | E      | 13 | 1418.6927       | 709.8500        | 473.5691        |
|         | 1027.4132       | 514.2102        | 343.1426        | 9  | A      | 12 | 1289.6501       | 645.3287        | 430.5549        |
|         | 1208.4272       | 604.7172        | 403.4806        | 10 | T[181] | 11 | 1218.6130       | 609.8101        | 406.8758        |
|         | 1305.4800       | 653.2436        | 435.8315        | 11 | P      | 10 | 1037.5989       | 519.3031        | 346.5378        |
|         | 1404.5484       | 702.7778        | 468.8543        | 12 | V      | 9  | 940.5462        | 470.7767        | 314.1869        |
|         | 1517.6324       | 759.3199        | 506.5490        | 13 | L      | 8  | 841.4778        | 421.2425        | 281.1641        |
|         | 1614.6852       | 807.8462        | 538.8999        | 14 | P      | 7  | 728.3937        | 364.7005        | 243.4694        |
|         | 1685.7223       | 843.3648        | 562.5790        | 15 | A      | 6  | 631.3410        | 316.1741        | 211.1185        |
|         | 1799.7652       | 900.3863        | 600.5933        | 16 | N      | 5  | 560.3038        | 280.6556        | 187.4395        |
|         | 1928.8078       | 964.9076        | 643.6075        | 17 | E      | 4  | 446.2609        | 223.6341        | 149.4252        |
|         | 1999.8449       | 1000.4261       | 667.2865        | 18 | A      | 3  | 317.2183        | 159.1128        | 106.4110        |
|         | 2098.9134       | 1049.9603       | 700.3093        | 19 | V      | 2  | 246.1812        | 123.5942        | 82.7319         |
|         |                 |                 |                 | 20 | K      | 1  | 147.1128        | 74.0600         | 49.7091         |

# Annotated spectra from Saleem et. al. 2009

K.SGTST<sub>181</sub>GSAGT<sub>181</sub>PEPGSGEKGGDDIDLDELLK.S/3

0.9999

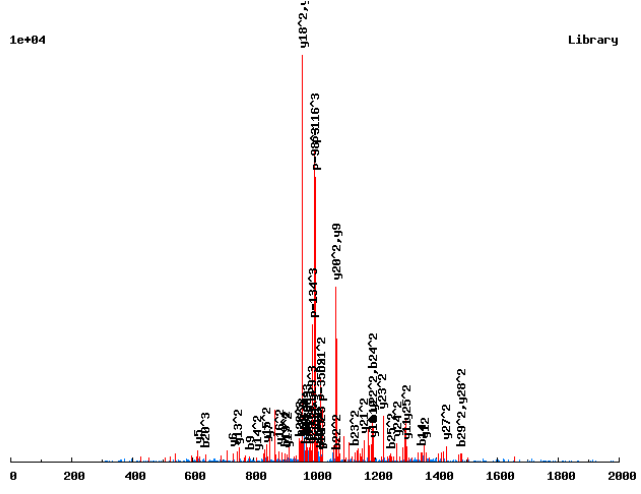

| Library | b <sup>1+</sup> | b <sup>2+</sup> | b <sup>3+</sup> | #  | AA     | #  | y <sup>1+</sup> | y <sup>2+</sup> | y <sup>3+</sup> |
|---------|-----------------|-----------------|-----------------|----|--------|----|-----------------|-----------------|-----------------|
|         | 88.0393         | 44.5233         | 30.0180         | 1  | S      | 30 |                 |                 |                 |
|         | 145.0608        | 73.0340         | 49.0251         | 2  | G      | 29 | 3019.3068       | 1510.1570       | 1007.1071       |
|         | 246.1085        | 123.5579        | 82.7077         | 3  | T      | 28 | 2962.2853       | 1481.6463       | 988.1000        |
|         | 333.1405        | 167.0739        | 111.7183        | 4  | S      | 27 | 2861.2376       | 1431.1225       | 954.4174        |
|         | 514.1545        | 257.5809        | 172.0564        | 5  | T[181] | 26 | 2774.2056       | 1387.6064       | 925.4067        |
|         | 571.1760        | 286.0916        | 191.0635        | 6  | G      | 25 | 2593.1916       | 1297.0994       | 865.0687        |
|         | 658.2080        | 329.6076        | 220.0742        | 7  | S      | 24 | 2536.1701       | 1268.5887       | 846.0616        |
|         | 729.2451        | 365.1262        | 243.7532        | 8  | A      | 23 | 2449.1381       | 1225.0727       | 817.0509        |
|         | 786.2666        | 393.6369        | 262.7604        | 9  | G      | 22 | 2378.1010       | 1189.5541       | 793.3719        |
|         | 967.2806        | 484.1439        | 323.0984        | 10 | T[181] | 21 | 2321.0795       | 1161.0434       | 774.3647        |
|         | 1064.3333       | 532.6703        | 355.4493        | 11 | P      | 20 | 2140.0655       | 1070.5364       | 714.0267        |
|         | 1193.3759       | 597.1916        | 398.4635        | 12 | E      | 19 | 2043.0128       | 1022.0100       | 681.6758        |
|         | 1290.4287       | 645.7180        | 430.8144        | 13 | P      | 18 | 1913.9702       | 957.4887        | 638.6616        |
|         | 1347.4501       | 674.2287        | 449.8216        | 14 | G      | 17 | 1816.9174       | 908.9623        | 606.3107        |
|         | 1434.4822       | 717.7447        | 478.8322        | 15 | S      | 16 | 1759.8959       | 880.4516        | 587.3035        |
|         | 1491.5036       | 746.2555        | 497.8394        | 16 | G      | 15 | 1672.8639       | 836.9356        | 558.2928        |
|         | 1620.5462       | 810.7767        | 540.8536        | 17 | E      | 14 | 1615.8425       | 808.4249        | 539.2857        |
|         | 1748.6412       | 874.8242        | 583.5519        | 18 | K      | 13 | 1486.7999       | 743.9036        | 496.2715        |
|         | 1805.6626       | 903.3350        | 602.5591        | 19 | G      | 12 | 1358.7049       | 679.8561        | 453.5732        |
|         | 1920.6896       | 960.8484        | 640.9014        | 20 | D      | 11 | 1301.6834       | 651.3454        | 434.5660        |
|         | 2035.7165       | 1018.3619       | 679.2437        | 21 | D      | 10 | 1186.6565       | 593.8319        | 396.2237        |
|         | 2148.8006       | 1074.9039       | 716.9384        | 22 | I      | 9  | 1071.6296       | 536.3184        | 357.8814        |
|         | 2263.8275       | 1132.4174       | 755.2807        | 23 | D      | 8  | 958.5455        | 479.7764        | 320.1867        |
|         | 2376.9116       | 1188.9594       | 792.9754        | 24 | L      | 7  | 843.5186        | 422.2629        | 281.8444        |
|         | 2491.9385       | 1246.4729       | 831.3177        | 25 | D      | 6  | 730.4345        | 365.7209        | 244.1497        |
|         | 2620.9811       | 1310.9942       | 874.3319        | 26 | E      | 5  | 615.4076        | 308.2074        | 205.8074        |
|         | 2734.0652       | 1367.5362       | 912.0266        | 27 | L      | 4  | 486.3650        | 243.6861        | 162.7932        |
|         | 2847.1492       | 1424.0783       | 949.7213        | 28 | L      | 3  | 373.2809        | 187.1441        | 125.0985        |
|         | 2960.2333       | 1480.6203       | 987.4159        | 29 | L      | 2  | 260.1969        | 130.6021        | 87.4038         |
|         |                 |                 |                 | 30 | K      | 1  | 147.1128        | 74.0600         | 49.7091         |

# Annotated spectra from Saleem et. al. 2009

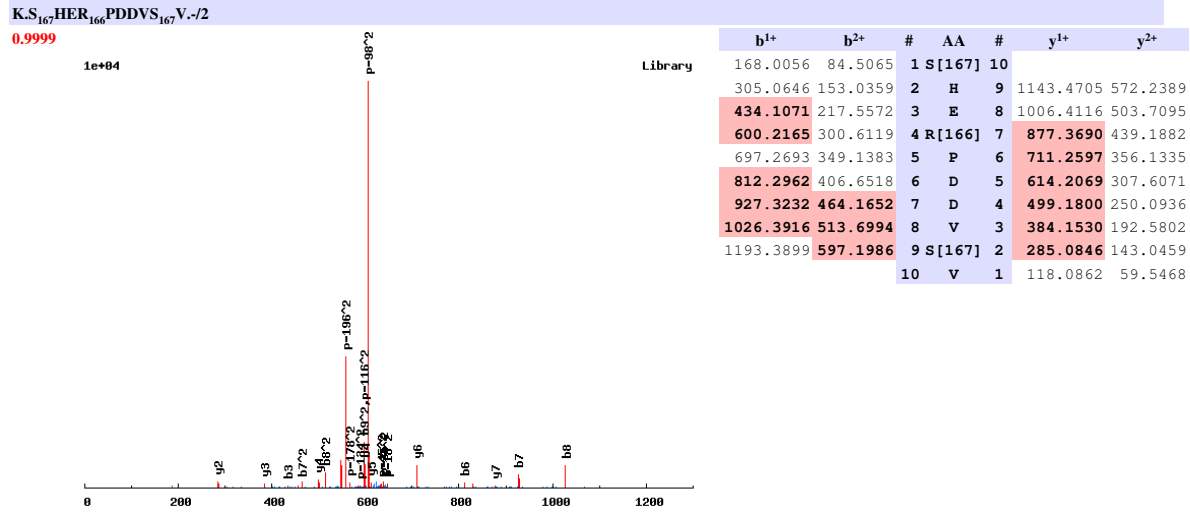

# Annotated spectra from Saleem et. al. 2009

R.S<sub>167</sub>HQLSHAT<sub>181</sub>TSSPNNNAPIVVGR.G/3

0.9967

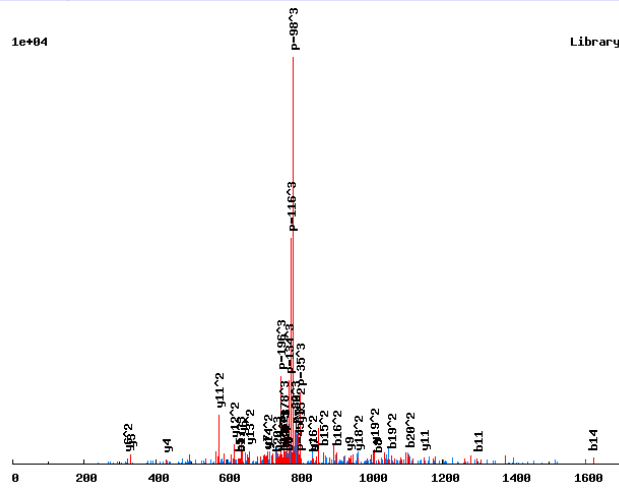

| Library | b <sup>1+</sup>  | b <sup>2+</sup>  | b <sup>3+</sup> | #  | AA     | #  | y <sup>1+</sup>  | y <sup>2+</sup>  | y <sup>3+</sup> |
|---------|------------------|------------------|-----------------|----|--------|----|------------------|------------------|-----------------|
|         | 168.0056         | 84.5065          | 56.6734         | 1  | S[167] | 22 |                  |                  |                 |
|         | 305.0646         | 153.0359         | 102.3597        | 2  | H      | 21 | 2280.0881        | 1140.5477        | <b>760.7009</b> |
|         | 433.1231         | 217.0652         | 145.0459        | 3  | Q      | 20 | 2143.0292        | 1072.0182        | 715.0146        |
|         | 520.1552         | 260.5812         | 174.0566        | 4  | S      | 19 | 2014.9706        | <b>1007.9889</b> | 672.3284        |
|         | <b>633.2392</b>  | 317.1233         | 211.7513        | 5  | L      | 18 | 1927.9385        | <b>964.4729</b>  | 643.3177        |
|         | <b>770.2981</b>  | 385.6527         | 257.4376        | 6  | H      | 17 | 1814.8545        | 907.9309         | 605.6230        |
|         | <b>841.3352</b>  | 421.1713         | 281.1166        | 7  | A      | 16 | 1677.7956        | <b>839.4014</b>  | 559.9367        |
|         | <b>1022.3493</b> | 511.6783         | 341.4546        | 8  | T[181] | 15 | 1606.7585        | <b>803.8829</b>  | 536.2577        |
|         | 1123.3969        | 562.2021         | 375.1372        | 9  | T      | 14 | 1425.7445        | <b>713.3759</b>  | 475.9197        |
|         | 1210.4290        | 605.7181         | 404.1478        | 10 | S      | 13 | 1324.6968        | <b>662.8520</b>  | 442.2371        |
|         | <b>1297.4610</b> | 649.2341         | 433.1585        | 11 | S      | 12 | 1237.6647        | <b>619.3360</b>  | 413.2264        |
|         | 1394.5138        | 697.7605         | 465.5094        | 12 | P      | 11 | <b>1150.6327</b> | <b>575.8200</b>  | 384.2158        |
|         | 1508.5567        | <b>754.7820</b>  | 503.5237        | 13 | N      | 10 | 1053.5800        | 527.2936         | 351.8648        |
|         | <b>1622.5996</b> | 811.8034         | 541.5381        | 14 | N      | 9  | <b>939.5370</b>  | 470.2722         | 313.8505        |
|         | 1736.6425        | <b>868.8249</b>  | 579.5524        | 15 | N      | 8  | 825.4941         | 413.2507         | 275.8362        |
|         | 1807.6797        | <b>904.3435</b>  | 603.2314        | 16 | A      | 7  | <b>711.4512</b>  | 356.2292         | 237.8219        |
|         | 1904.7324        | 952.8698         | <b>635.5823</b> | 17 | P      | 6  | <b>640.4141</b>  | <b>320.7107</b>  | 214.1429        |
|         | 2017.8165        | 1009.4119        | 673.2770        | 18 | I      | 5  | 543.3613         | 272.1843         | 181.7920        |
|         | 2116.8849        | <b>1058.9461</b> | 706.2998        | 19 | V      | 4  | <b>430.2772</b>  | 215.6423         | 144.0973        |
|         | 2215.9533        | <b>1108.4803</b> | <b>739.3226</b> | 20 | V      | 3  | <b>331.2088</b>  | 166.1080         | 111.0745        |
|         | 2272.9748        | 1136.9910        | <b>758.3298</b> | 21 | G      | 2  | 232.1404         | 116.5738         | 78.0517         |
|         |                  |                  |                 | 22 | R      | 1  | 175.1190         | 88.0631          | 59.0445         |

# Annotated spectra from Saleem et. al. 2009

R.SHS<sub>167</sub>DTTLYSR.N/2

0.9989

1e+04

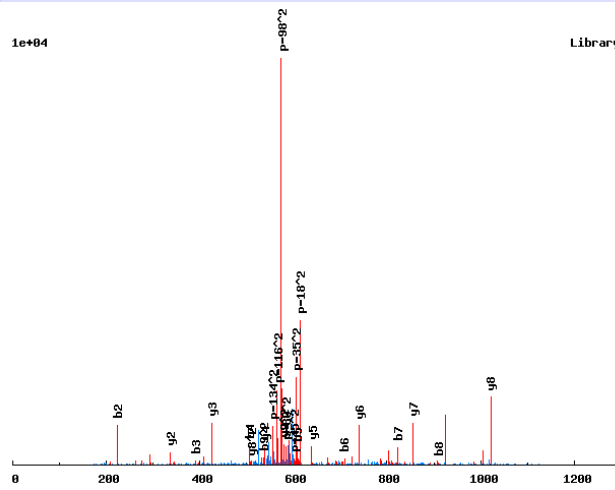

| Library | b <sup>1+</sup> | b <sup>2+</sup> | #  | AA     | #  | y <sup>1+</sup> | y <sup>2+</sup> |
|---------|-----------------|-----------------|----|--------|----|-----------------|-----------------|
|         | 88.0393         | 44.5233         | 1  | S      | 10 |                 |                 |
|         | 225.0982        | 113.0528        | 2  | H      | 9  | 1159.4779       | 580.2426        |
|         | 392.0966        | 196.5519        | 3  | S[167] | 8  | 1022.4190       | 511.7132        |
|         | 507.1235        | 254.0654        | 4  | D      | 7  | 855.4207        | 428.2140        |
|         | 608.1712        | 304.5892        | 5  | T      | 6  | 740.3937        | 370.7005        |
|         | 709.2189        | 355.1131        | 6  | T      | 5  | 639.3461        | 320.1767        |
|         | 822.3029        | 411.6551        | 7  | L      | 4  | 538.2984        | 269.6528        |
|         | 909.3350        | 455.1711        | 8  | S      | 3  | 425.2143        | 213.1108        |
|         | 1072.3983       | 536.7028        | 9  | Y      | 2  | 338.1823        | 169.5948        |
|         |                 |                 | 10 | R      | 1  | 175.1190        | 88.0631         |







# Annotated spectra from Saleem et. al. 2009

R.SHS<sub>167</sub>LVS<sub>167</sub>HAPS<sub>167</sub>IPR<sub>166</sub>Q/3

0.5836

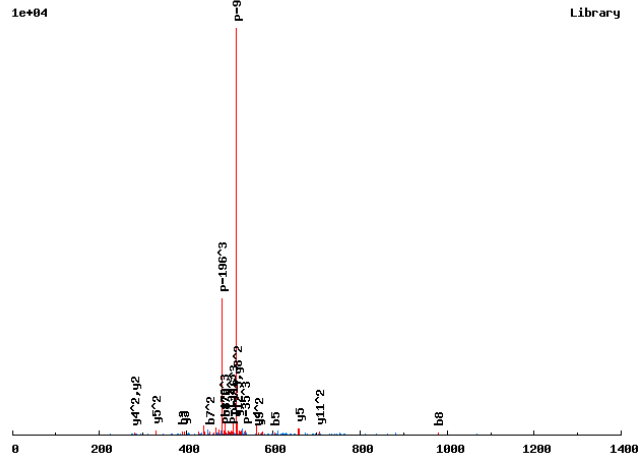

| Library | b <sup>1+</sup> | b <sup>2+</sup> | b <sup>3+</sup> | #  | AA     | #  | y <sup>1+</sup> | y <sup>2+</sup> | y <sup>3+</sup> |
|---------|-----------------|-----------------|-----------------|----|--------|----|-----------------|-----------------|-----------------|
|         | 88.0393         | 44.5233         | 30.0180         | 1  | S      | 13 |                 |                 |                 |
|         | 225.0982        | 113.0528        | 75.7043         | 2  | H      | 12 | 1550.6193       | 775.8133        | 517.5446        |
|         | 392.0966        | 196.5519        | 131.3704        | 3  | S[167] | 11 | 1413.5604       | 707.2838        | 471.8583        |
|         | 505.1806        | 253.0940        | 169.0651        | 4  | L      | 10 | 1246.5620       | 623.7846        | 416.1922        |
|         | 604.2491        | 302.6282        | 202.0879        | 5  | V      | 9  | 1133.4780       | 567.2426        | 378.4975        |
|         | 771.2474        | 386.1273        | 257.7540        | 6  | S[167] | 8  | 1034.4095       | 517.7084        | 345.4747        |
|         | 908.3063        | 454.6568        | 303.4403        | 7  | H      | 7  | 867.4112        | 434.2092        | 289.8086        |
|         | 979.3434        | 490.1754        | 327.1193        | 8  | A      | 6  | 730.3523        | 365.6798        | 244.1223        |
|         | 1076.3962       | 538.7017        | 359.4703        | 9  | P      | 5  | 659.3152        | 330.1612        | 220.4432        |
|         | 1243.3946       | 622.2009        | 415.1364        | 10 | S[167] | 4  | 562.2624        | 281.6348        | 188.0923        |
|         | 1356.4786       | 678.7429        | 452.8311        | 11 | I      | 3  | 395.2640        | 198.1357        | 132.4262        |
|         | 1453.5314       | 727.2693        | 485.1820        | 12 | P      | 2  | 282.1800        | 141.5936        | 94.7315         |
|         |                 |                 |                 | 13 | R[166] | 1  | 185.1272        | 93.0672         | 62.3806         |

# Annotated spectra from Saleem et. al. 2009

K.S<sub>167</sub>HSVPDLNTATPSS<sub>167</sub>PK.R/2

0.675

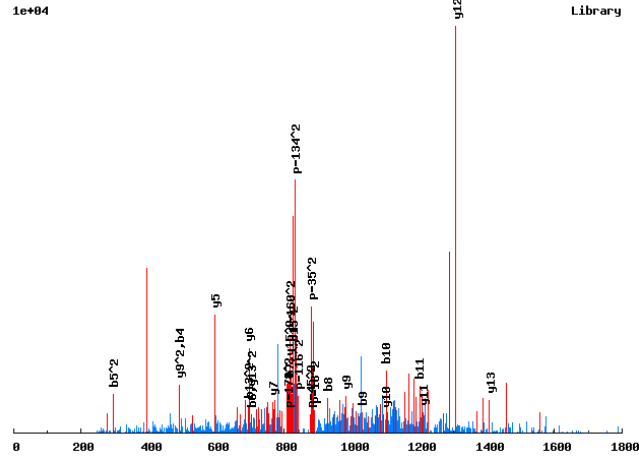

| Library | b <sup>1+</sup> | b <sup>2+</sup> | #  | AA      | #  | y <sup>1+</sup> | y <sup>2+</sup> |
|---------|-----------------|-----------------|----|---------|----|-----------------|-----------------|
|         | 168.0056        | 84.5065         | 1  | S [167] | 16 |                 |                 |
|         | 305.0646        | 153.0359        | 2  | H       | 15 | 1630.7472       | 815.8773        |
|         | 392.0966        | 196.5519        | 3  | S       | 14 | 1493.6883       | 747.3478        |
|         | 491.1650        | 246.0861        | 4  | V       | 13 | 1406.6563       | 703.8318        |
|         | 588.2178        | 294.6125        | 5  | P       | 12 | 1307.5879       | 654.2976        |
|         | 703.2447        | 352.1260        | 6  | D       | 11 | 1210.5351       | 605.7712        |
|         | 816.3288        | 408.6680        | 7  | L       | 10 | 1095.5082       | 548.2577        |
|         | 930.3717        | 465.6895        | 8  | N       | 9  | 982.4241        | 491.7157        |
|         | 1031.4194       | 516.2133        | 9  | T       | 8  | 868.3812        | 434.6942        |
|         | 1102.4565       | 551.7319        | 10 | A       | 7  | 767.3335        | 384.1704        |
|         | 1203.5042       | 602.2557        | 11 | T       | 6  | 696.2964        | 348.6518        |
|         | 1300.5569       | 650.7821        | 12 | P       | 5  | 595.2487        | 298.1280        |
|         | 1387.5889       | 694.2981        | 13 | S       | 4  | 498.1960        | 249.6016        |
|         | 1554.5873       | 777.7973        | 14 | S [167] | 3  | 411.1639        | 206.0856        |
|         | 1651.6401       | 826.3237        | 15 | P       | 2  | 244.1656        | 122.5864        |
|         |                 |                 | 16 | K       | 1  | 147.1128        | 74.0600         |

# Annotated spectra from Saleem et. al. 2009

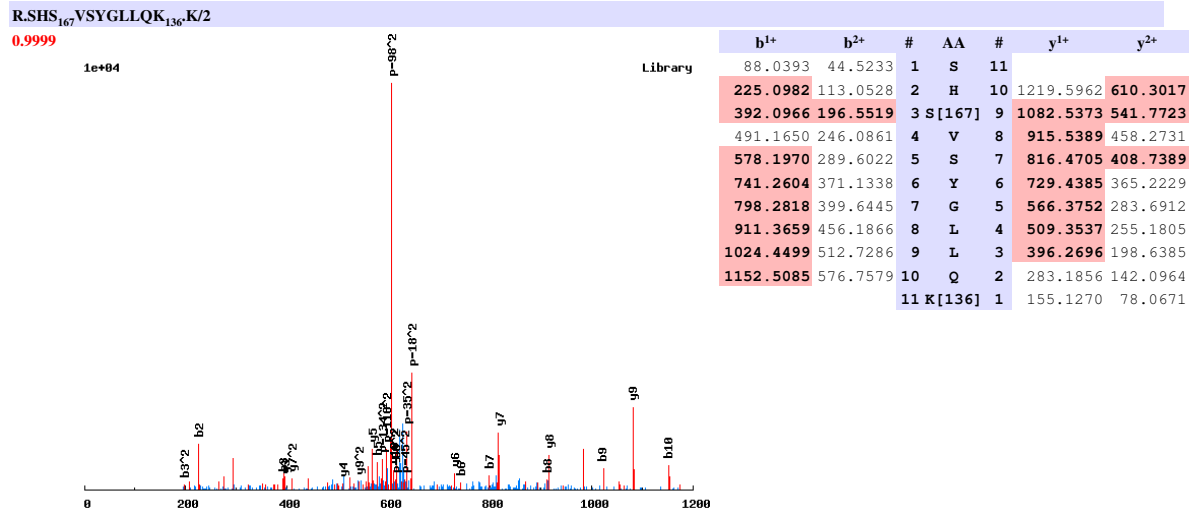

# Annotated spectra from Saleem et. al. 2009

R.S<sub>167</sub>IDDIDSTR.L/2

0.8358

1e+04

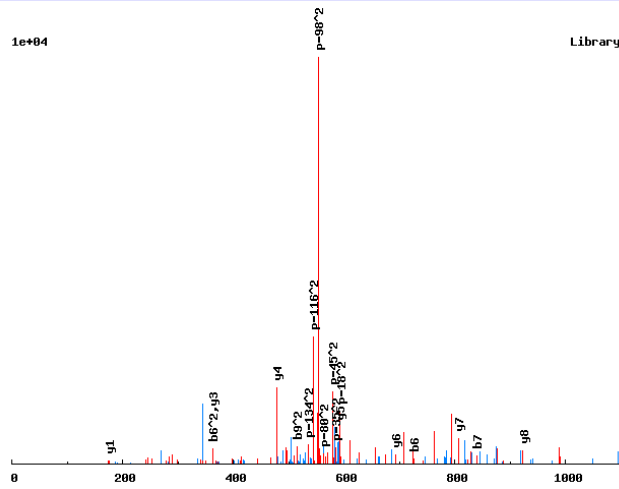

| Library | b <sup>1+</sup> | b <sup>2+</sup> | #  | AA     | #  | y <sup>1+</sup> | y <sup>2+</sup> |
|---------|-----------------|-----------------|----|--------|----|-----------------|-----------------|
|         | 168.0056        | 84.5065         | 1  | S[167] | 10 |                 |                 |
|         | 281.0897        | 141.0485        | 2  | I      | 9  | 1035.4953       | 518.2513        |
|         | 396.1166        | 198.5620        | 3  | D      | 8  | 922.4112        | 461.7093        |
|         | 511.1436        | 256.0754        | 4  | D      | 7  | 807.3843        | 404.1958        |
|         | 612.1913        | 306.5993        | 5  | T      | 6  | 692.3573        | 346.6823        |
|         | 725.2753        | 363.1413        | 6  | I      | 5  | 591.3097        | 296.1585        |
|         | 840.3023        | 420.6548        | 7  | D      | 4  | 478.2256        | 239.6164        |
|         | 927.3343        | 464.1708        | 8  | S      | 3  | 363.1987        | 182.1030        |
|         | 1028.3820       | 514.6946        | 9  | T      | 2  | 276.1666        | 138.5870        |
|         |                 |                 | 10 | R      | 1  | 175.1190        | 88.0631         |

# Annotated spectra from Saleem et. al. 2009

R.S<sub>167</sub>IDSISS<sub>167</sub>SFIK.S/2

0.8386

1e+04

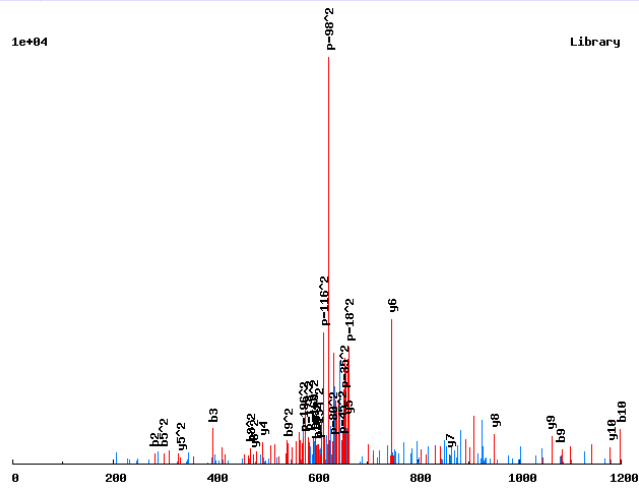

| Library | b <sup>1+</sup> | b <sup>2+</sup> | #  | AA     | #  | y <sup>1+</sup> | y <sup>2+</sup> |
|---------|-----------------|-----------------|----|--------|----|-----------------|-----------------|
|         | 168.0056        | 84.5065         | 1  | S[167] | 11 |                 |                 |
|         | 281.0897        | 141.0485        | 2  | I      | 10 | 1176.5548       | 588.7810        |
|         | 396.1166        | 198.5620        | 3  | D      | 9  | 1063.4707       | 532.2390        |
|         | 483.1487        | 242.0780        | 4  | S      | 8  | 948.4438        | 474.7255        |
|         | 596.2327        | 298.6200        | 5  | I      | 7  | 861.4118        | 431.2095        |
|         | 683.2648        | 342.1360        | 6  | S      | 6  | 748.3277        | 374.6675        |
|         | 850.2631        | 425.6352        | 7  | S[167] | 5  | 661.2957        | 331.1515        |
|         | 937.2952        | 469.1512        | 8  | S      | 4  | 494.2973        | 247.6523        |
|         | 1084.3636       | 542.6854        | 9  | F      | 3  | 407.2653        | 204.1363        |
|         | 1197.4476       | 599.2275        | 10 | I      | 2  | 260.1969        | 130.6021        |
|         |                 |                 | 11 | K      | 1  | 147.1128        | 74.0600         |

# Annotated spectra from Saleem et. al. 2009

R.SIDSISS<sub>167</sub>SFIK<sub>136</sub>S/2

0.8183

1e+04

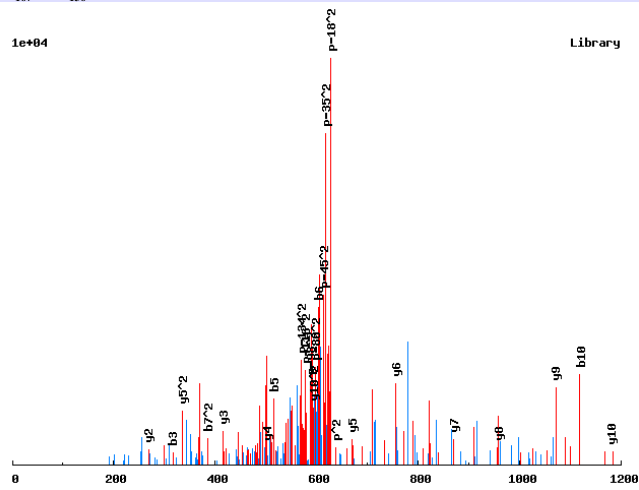

| Library | b <sup>1+</sup> | b <sup>2+</sup> | #  | AA     | #  | y <sup>1+</sup> | y <sup>2+</sup> |
|---------|-----------------|-----------------|----|--------|----|-----------------|-----------------|
|         | 88.0393         | 44.5233         | 1  | S      | 11 |                 |                 |
|         | 201.1234        | 101.0653        | 2  | I      | 10 | 1184.5690       | 592.7881        |
|         | 316.1503        | 158.5788        | 3  | D      | 9  | 1071.4849       | 536.2461        |
|         | 403.1823        | 202.0948        | 4  | S      | 8  | 956.4580        | 478.7326        |
|         | 516.2664        | 258.6368        | 5  | I      | 7  | 869.4260        | 435.2166        |
|         | 603.2984        | 302.1529        | 6  | S      | 6  | 756.3419        | 378.6746        |
|         | 770.2968        | 385.6520        | 7  | S[167] | 5  | 669.3099        | 335.1586        |
|         | 857.3288        | 429.1681        | 8  | S      | 4  | 502.3115        | 251.6594        |
|         | 1004.3972       | 502.7023        | 9  | F      | 3  | 415.2795        | 208.1434        |
|         | 1117.4813       | 559.2443        | 10 | I      | 2  | 268.2111        | 134.6092        |
|         |                 |                 | 11 | K[136] | 1  | 155.1270        | 78.0671         |



# Annotated spectra from Saleem et. al. 2009

K.S<sub>167</sub>HELPK<sub>136</sub>.L/2

0.959

1e+04

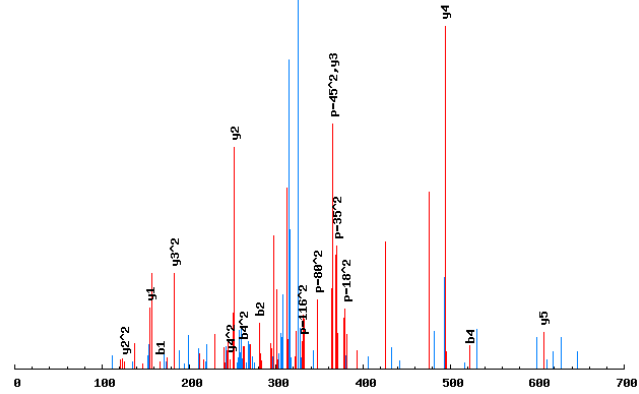

| Library | b <sup>1+</sup> | b <sup>2+</sup> | # | AA      | # | y <sup>1+</sup> | y <sup>2+</sup> |
|---------|-----------------|-----------------|---|---------|---|-----------------|-----------------|
|         | 168.0056        | 84.5065         | 1 | S [167] | 6 |                 |                 |
|         | 281.0897        | 141.0485        | 2 | I       | 5 | 607.3905        | 304.1989        |
|         | 410.1323        | 205.5698        | 3 | E       | 4 | 494.3064        | 247.6568        |
|         | 523.2164        | 262.1118        | 4 | L       | 3 | 365.2638        | 183.1355        |
|         | 620.2691        | 310.6382        | 5 | P       | 2 | 252.1798        | 126.5935        |
|         |                 |                 | 6 | K [136] | 1 | 155.1270        | 78.0671         |

# Annotated spectra from Saleem et. al. 2009

K.S<sub>167</sub>IHDENFER.S/2

0.9913

1e+04

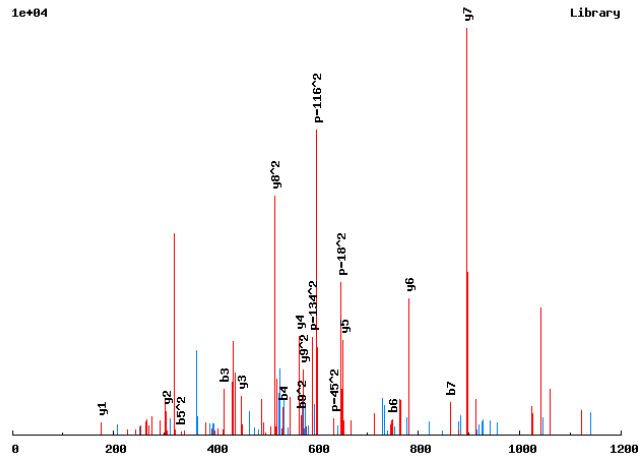

| Library | b <sup>1+</sup> | b <sup>2+</sup> | #  | AA | #     | y <sup>1+</sup> | y <sup>2+</sup> |
|---------|-----------------|-----------------|----|----|-------|-----------------|-----------------|
|         | 168.0056        | 84.5065         | 1  | S  | [167] | 10              |                 |
|         | 281.0897        | 141.0485        | 2  | I  | 9     | 1146.5174       | 573.7623        |
|         | 418.1486        | 209.5779        | 3  | H  | 8     | 1033.4334       | 517.2203        |
|         | 533.1756        | 267.0914        | 4  | D  | 7     | 896.3744        | 448.6909        |
|         | 662.2181        | 331.6127        | 5  | E  | 6     | 781.3475        | 391.1774        |
|         | 749.2502        | 375.1287        | 6  | S  | 5     | 652.3049        | 326.6561        |
|         | 863.2931        | 432.1502        | 7  | N  | 4     | 565.2729        | 283.1401        |
|         | 1010.3615       | 505.6844        | 8  | F  | 3     | 451.2299        | 226.1186        |
|         | 1139.4041       | 570.2057        | 9  | E  | 2     | 304.1615        | 152.5844        |
|         |                 |                 | 10 | R  | 1     | 175.1190        | 88.0631         |

# Annotated spectra from Saleem et. al. 2009

K.S<sub>167</sub>ISGGTFGFR<sub>166</sub>S/2

0.9855

1e+04

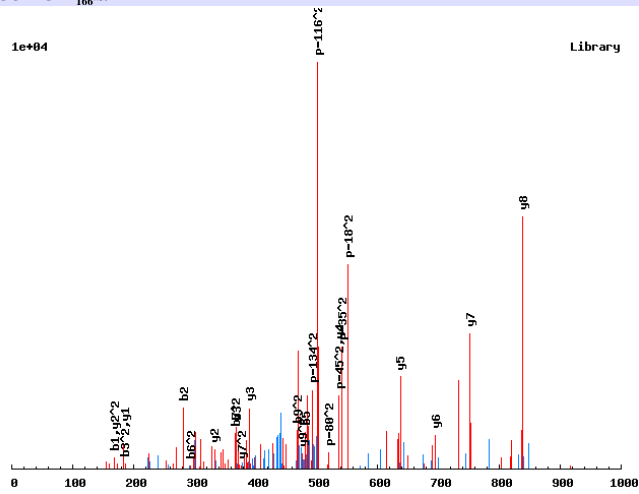

| Library | b <sup>1+</sup> | b <sup>2+</sup> | #  | AA      | #  | y <sup>1+</sup> | y <sup>2+</sup> |
|---------|-----------------|-----------------|----|---------|----|-----------------|-----------------|
|         | 168.0056        | 84.5065         | 1  | S [167] | 10 |                 |                 |
|         | 281.0897        | 141.0485        | 2  | I       | 9  | 951.4922        | 476.2497        |
|         | 368.1217        | 184.5645        | 3  | S       | 8  | 838.4081        | 419.7077        |
|         | 425.1432        | 213.0752        | 4  | G       | 7  | 751.3761        | 376.1917        |
|         | 482.1647        | 241.5860        | 5  | G       | 6  | 694.3546        | 347.6810        |
|         | 583.2123        | 292.1098        | 6  | T       | 5  | 637.3332        | 319.1702        |
|         | 730.2807        | 365.6440        | 7  | F       | 4  | 536.2855        | 268.6464        |
|         | 787.3022        | 394.1547        | 8  | G       | 3  | 389.2171        | 195.1122        |
|         | 934.3706        | 467.6889        | 9  | F       | 2  | 332.1956        | 166.6015        |
|         |                 |                 | 10 | R [166] | 1  | 185.1272        | 93.0672         |

# Annotated spectra from Saleem et. al. 2009

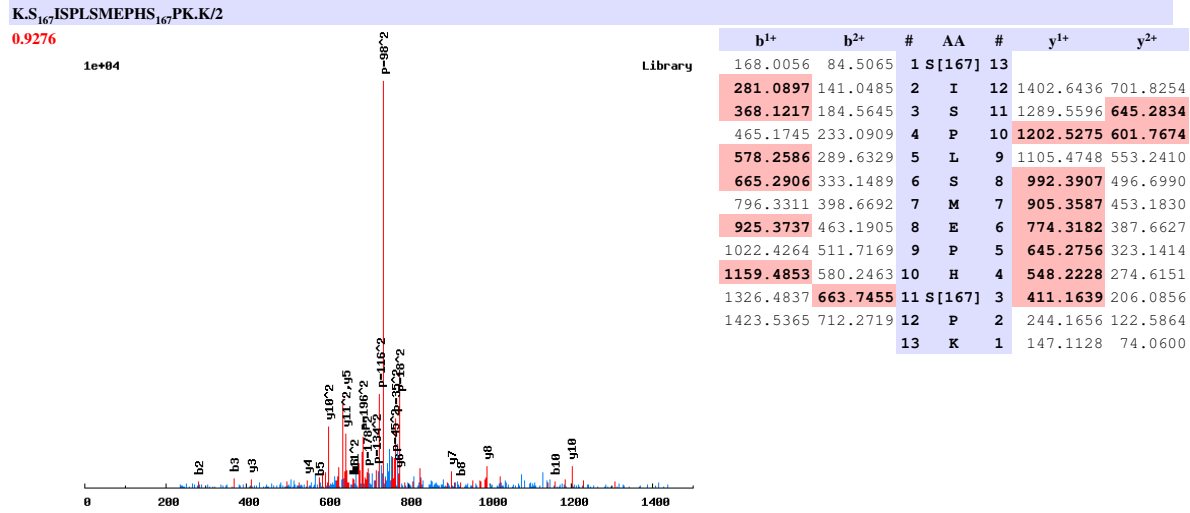

# Annotated spectra from Saleem et. al. 2009

R.S<sub>167</sub>S<sub>167</sub>RGPTK.N/2

0.7103

1e+04

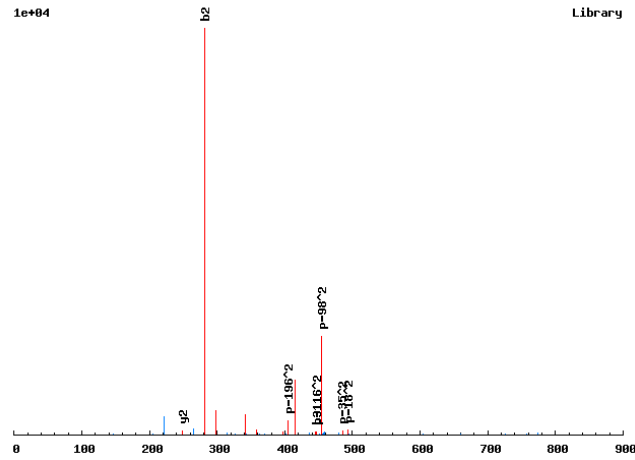

Library

| b <sup>1+</sup> | b <sup>2+</sup> | # | AA     | # | y <sup>1+</sup> | y <sup>2+</sup> |
|-----------------|-----------------|---|--------|---|-----------------|-----------------|
| 168.0056        | 84.5065         | 1 | S[167] | 8 |                 |                 |
| 281.0897        | 141.0485        | 2 | I      | 7 | 838.4182        | 419.7128        |
| 448.0881        | 224.5477        | 3 | S[167] | 6 | 725.3342        | 363.1707        |
| 604.1892        | 302.5982        | 4 | R      | 5 | 558.3358        | 279.6715        |
| 661.2106        | 331.1090        | 5 | G      | 4 | 402.2347        | 201.6210        |
| 758.2634        | 379.6353        | 6 | P      | 3 | 345.2132        | 173.1103        |
| 859.3111        | 430.1592        | 7 | T      | 2 | 248.1605        | 124.5839        |
|                 |                 | 8 | K      | 1 | 147.1128        | 74.0600         |

# Annotated spectra from Saleem et. al. 2009

R.SIYMDDFT<sub>181</sub>DLTK.R/3

0.6149

1e+04

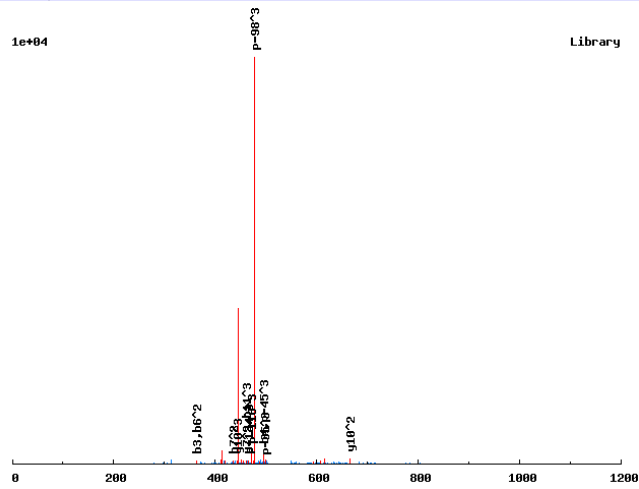

| Library | b <sup>1+</sup> | b <sup>2+</sup> | b <sup>3+</sup> | #  | AA     | #  | y <sup>1+</sup> | y <sup>2+</sup> | y <sup>3+</sup> |
|---------|-----------------|-----------------|-----------------|----|--------|----|-----------------|-----------------|-----------------|
|         | 88.0393         | 44.5233         | 30.0180         | 1  | S      | 12 |                 |                 |                 |
|         | 201.1234        | 101.0653        | 67.7126         | 2  | I      | 11 | 1441.5957       | 721.3015        | 481.2034        |
|         | 364.1867        | 182.5970        | 122.0671        | 3  | Y      | 10 | 1328.5116       | 664.7594        | 443.5087        |
|         | 495.2272        | 248.1172        | 165.7472        | 4  | M      | 9  | 1165.4483       | 583.2278        | 389.1543        |
|         | 610.2541        | 305.6307        | 204.0896        | 5  | D      | 8  | 1034.4078       | 517.7075        | 345.4741        |
|         | 725.2811        | 363.1442        | 242.4319        | 6  | D      | 7  | 919.3808        | 460.1941        | 307.1318        |
|         | 872.3495        | 436.6784        | 291.4547        | 7  | F      | 6  | 804.3539        | 402.6806        | 268.7895        |
|         | 1053.3635       | 527.1854        | 351.7927        | 8  | T[181] | 5  | 657.2855        | 329.1464        | 219.7667        |
|         | 1168.3904       | 584.6989        | 390.1350        | 9  | D      | 4  | 476.2715        | 238.6394        | 159.4287        |
|         | 1281.4745       | 641.2409        | 427.8297        | 10 | L      | 3  | 361.2445        | 181.1259        | 121.0864        |
|         | 1382.5222       | 691.7647        | 461.5122        | 11 | T      | 2  | 248.1605        | 124.5839        | 83.3917         |
|         |                 |                 |                 | 12 | K      | 1  | 147.1128        | 74.0600         | 49.7091         |

# Annotated spectra from Saleem et. al. 2009

K.SKDFS<sub>167</sub>SVS<sub>167</sub>TR.Q/2

0.8579

1e+04

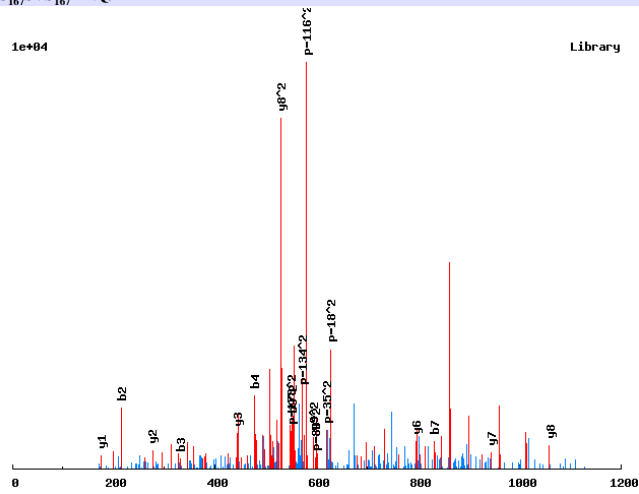

| Library | b <sup>1+</sup> | b <sup>2+</sup> | #  | AA     | #  | y <sup>1+</sup> | y <sup>2+</sup> |
|---------|-----------------|-----------------|----|--------|----|-----------------|-----------------|
|         | 88.0393         | 44.5233         | 1  | S      | 10 |                 |                 |
|         | 216.1343        | 108.5708        | 2  | K      | 9  | 1186.4541       | 593.7307        |
|         | 331.1612        | 166.0842        | 3  | D      | 8  | 1058.3591       | 529.6832        |
|         | 478.2296        | 239.6184        | 4  | F      | 7  | 943.3322        | 472.1697        |
|         | 645.2280        | 323.1176        | 5  | S[167] | 6  | 796.2638        | 398.6355        |
|         | 732.2600        | 366.6336        | 6  | S      | 5  | 629.2654        | 315.1364        |
|         | 831.3284        | 416.1679        | 7  | V      | 4  | 542.2334        | 271.6203        |
|         | 998.3268        | 499.6670        | 8  | S[167] | 3  | 443.1650        | 222.0861        |
|         | 1099.3745       | 550.1909        | 9  | T      | 2  | 276.1666        | 138.5870        |
|         |                 |                 | 10 | R      | 1  | 175.1190        | 88.0631         |

# Annotated spectra from Saleem et. al. 2009

K<sub>167</sub>S<sub>167</sub>K<sub>136</sub>LNDAVEYVSGR<sub>166</sub>V/2

0.7243

1e+04

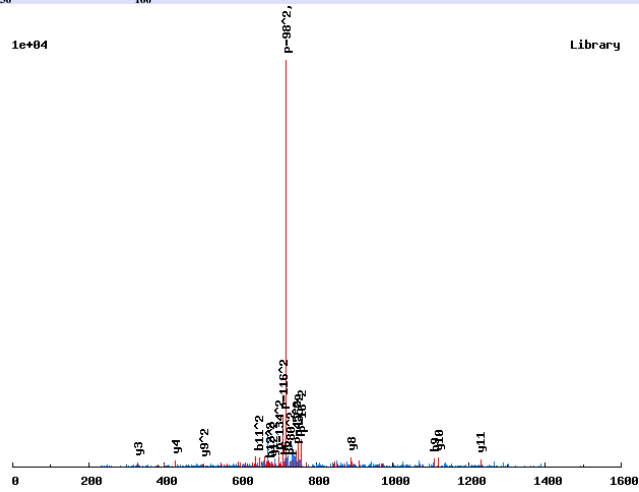

| Library | b <sup>1+</sup> | b <sup>2+</sup> | #  | AA     | #  | y <sup>1+</sup> | y <sup>2+</sup> |
|---------|-----------------|-----------------|----|--------|----|-----------------|-----------------|
|         | 168.0056        | 84.5065         | 1  | S[167] | 13 |                 |                 |
|         | 304.1148        | 152.5610        | 2  | K[136] | 12 | 1368.7236       | 684.8655        |
|         | 417.1989        | 209.1031        | 3  | L      | 11 | 1232.6145       | 616.8109        |
|         | 531.2418        | 266.1245        | 4  | N      | 10 | 1119.5304       | 560.2689        |
|         | 646.2687        | 323.6380        | 5  | D      | 9  | 1005.4875       | 503.2474        |
|         | 717.3058        | 359.1566        | 6  | A      | 8  | 890.4606        | 445.7339        |
|         | 816.3742        | 408.6908        | 7  | V      | 7  | 819.4234        | 410.2154        |
|         | 945.4168        | 473.2121        | 8  | E      | 6  | 720.3550        | 360.6812        |
|         | 1108.4802       | 554.7437        | 9  | Y      | 5  | 591.3124        | 296.1599        |
|         | 1207.5486       | 604.2779        | 10 | V      | 4  | 428.2491        | 214.6282        |
|         | 1294.5806       | 647.7939        | 11 | S      | 3  | 329.1807        | 165.0940        |
|         | 1351.6021       | 676.3047        | 12 | G      | 2  | 242.1487        | 121.5780        |
|         |                 |                 | 13 | R[166] | 1  | 185.1272        | 93.0672         |



# Annotated spectra from Saleem et. al. 2009

R.SKS<sub>167</sub>AEPHVNS<sub>167</sub>PNLIPVQK.Q/3

0.9989

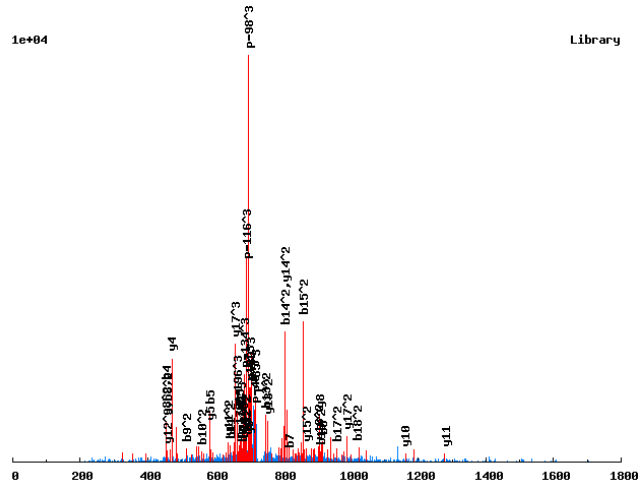

| Library | b <sup>1+</sup> | b <sup>2+</sup> | b <sup>3+</sup> | #  | AA     | #  | y <sup>1+</sup> | y <sup>2+</sup> | y <sup>3+</sup> |
|---------|-----------------|-----------------|-----------------|----|--------|----|-----------------|-----------------|-----------------|
|         | 88.0393         | 44.5233         | 30.0180         | 1  | S      | 19 |                 |                 |                 |
|         | 216.1343        | 108.5708        | 72.7163         | 2  | K      | 18 | 2104.9828       | 1052.9950       | 702.3324        |
|         | 383.1326        | 192.0700        | 128.3824        | 3  | S[167] | 17 | 1976.8878       | 988.9476        | 659.6341        |
|         | 454.1697        | 227.5885        | 152.0614        | 4  | A      | 16 | 1809.8895       | 905.4484        | 603.9680        |
|         | 583.2123        | 292.1098        | 195.0756        | 5  | E      | 15 | 1738.8524       | 869.9298        | 580.2890        |
|         | 680.2651        | 340.6362        | 227.4266        | 6  | P      | 14 | 1609.8098       | 805.4085        | 537.2748        |
|         | 817.3240        | 409.1656        | 273.1129        | 7  | H      | 13 | 1512.7570       | 756.8821        | 504.9239        |
|         | 916.3924        | 458.6998        | 306.1357        | 8  | V      | 12 | 1375.6981       | 688.3527        | 459.2376        |
|         | 1030.4353       | 515.7213        | 344.1500        | 9  | N      | 11 | 1276.6297       | 638.8185        | 426.2147        |
|         | 1117.4674       | 559.2373        | 373.1606        | 10 | S      | 10 | 1162.5868       | 581.7970        | 388.2004        |
|         | 1284.4657       | 642.7365        | 428.8268        | 11 | S[167] | 9  | 1075.5547       | 538.2810        | 359.1898        |
|         | 1381.5185       | 691.2629        | 461.1777        | 12 | P      | 8  | 908.5564        | 454.7818        | 303.5236        |
|         | 1495.5614       | 748.2844        | 499.1920        | 13 | N      | 7  | 811.5036        | 406.2554        | 271.1727        |
|         | 1608.6455       | 804.8264        | 536.8867        | 14 | L      | 6  | 697.4607        | 349.2340        | 233.1584        |
|         | 1721.7295       | 861.3684        | 574.5814        | 15 | I      | 5  | 584.3766        | 292.6919        | 195.4637        |
|         | 1818.7823       | 909.8948        | 606.9323        | 16 | P      | 4  | 471.2926        | 236.1499        | 157.7690        |
|         | 1917.8507       | 959.4290        | 639.9551        | 17 | V      | 3  | 374.2398        | 187.6235        | 125.4181        |
|         | 2045.9093       | 1023.4583       | 682.6413        | 18 | Q      | 2  | 275.1714        | 138.0893        | 92.3953         |
|         |                 |                 |                 | 19 | K      | 1  | 147.1128        | 74.0600         | 49.7091         |

# Annotated spectra from Saleem et. al. 2009

R.S<sub>167</sub>K<sub>136</sub>S<sub>167</sub>GTPDK<sub>136</sub>ESSASSLDSR<sub>166</sub> K/3

0.7996

1e+04

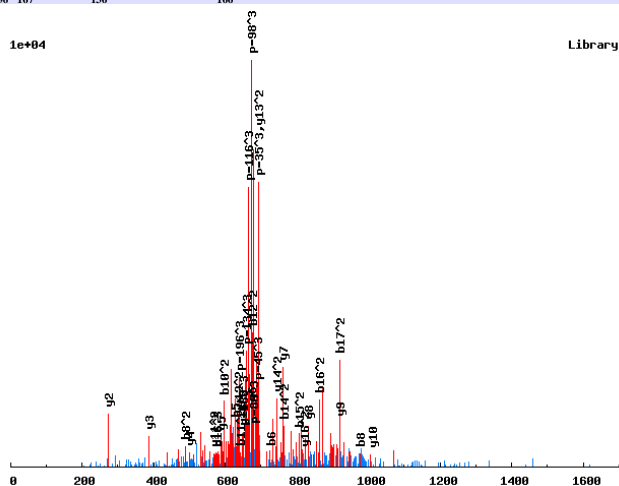

| Library | b <sup>1+</sup> | b <sup>2+</sup> | b <sup>3+</sup> | #  | AA | #        | y <sup>1+</sup> | y <sup>2+</sup> | y <sup>3+</sup> |
|---------|-----------------|-----------------|-----------------|----|----|----------|-----------------|-----------------|-----------------|
|         | 168.0056        | 84.5065         | 56.6734         | 1  | S  | [167] 19 |                 |                 |                 |
|         | 304.1148        | 152.5610        | 102.0431        | 2  | K  | [136] 18 | 1944.8756       | 972.9414        | 648.9634        |
|         | 471.1132        | 236.0602        | 157.7092        | 3  | S  | [167] 17 | 1808.7665       | 904.8869        | 603.5937        |
|         | 528.1346        | 264.5710        | 176.7164        | 4  | G  | 16       | 1641.7681       | 821.3877        | 547.9276        |
|         | 629.1823        | 315.0948        | 210.3990        | 5  | T  | 15       | 1584.7466       | 792.8770        | 528.9204        |
|         | 726.2351        | 363.6212        | 242.7499        | 6  | P  | 14       | 1483.6990       | 742.3531        | 495.2378        |
|         | 841.2620        | 421.1346        | 281.0922        | 7  | D  | 13       | 1386.6462       | 693.8267        | 462.8869        |
|         | 977.3712        | 489.1892        | 326.4619        | 8  | K  | [136] 12 | 1271.6193       | 636.3133        | 424.5446        |
|         | 1106.4137       | 553.7105        | 369.4761        | 9  | E  | 11       | 1135.5101       | 568.2587        | 379.1749        |
|         | 1193.4458       | 597.2265        | 398.4868        | 10 | S  | 10       | 1006.4675       | 503.7374        | 336.1607        |
|         | 1280.4778       | 640.7425        | 427.4975        | 11 | S  | 9        | 919.4355        | 460.2214        | 307.1500        |
|         | 1351.5149       | 676.2611        | 451.1765        | 12 | A  | 8        | 832.4034        | 416.7054        | 278.1393        |
|         | 1438.5470       | 719.7771        | 480.1872        | 13 | S  | 7        | 761.3663        | 381.1868        | 254.4603        |
|         | 1525.5790       | 763.2931        | 509.1978        | 14 | S  | 6        | 674.3343        | 337.6708        | 225.4496        |
|         | 1612.6110       | 806.8091        | 538.2085        | 15 | S  | 5        | 587.3023        | 294.1548        | 196.4389        |
|         | 1725.6951       | 863.3512        | 575.9032        | 16 | L  | 4        | 500.2702        | 250.6388        | 167.4283        |
|         | 1840.7220       | 920.8646        | 614.2455        | 17 | D  | 3        | 387.1862        | 194.0967        | 129.7336        |
|         | 1927.7540       | 964.3807        | 643.2562        | 18 | S  | 2        | 272.1592        | 136.5833        | 91.3913         |
|         |                 |                 |                 | 19 | R  | [166] 1  | 185.1272        | 93.0672         | 62.3806         |

# Annotated spectra from Saleem et. al. 2009

R.SKS<sub>167</sub>LPIT<sub>181</sub>PK.S/2

0.9579

1e+04

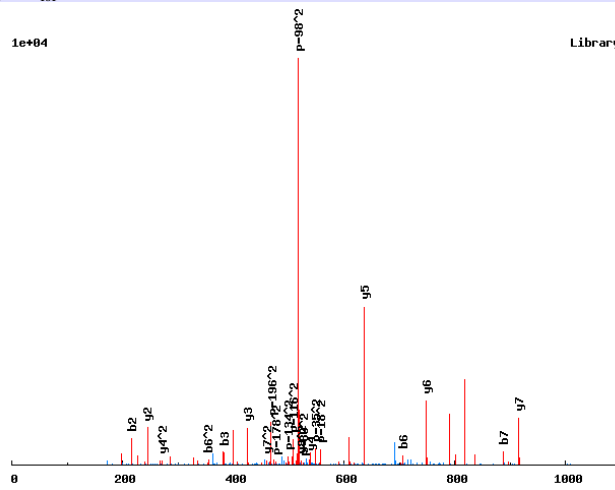

| Library | b <sup>1+</sup> | b <sup>2+</sup> | # | AA     | # | y <sup>1+</sup> | y <sup>2+</sup> |
|---------|-----------------|-----------------|---|--------|---|-----------------|-----------------|
|         | 88.0393         | 44.5233         | 1 | S      | 9 |                 |                 |
|         | 216.1343        | 108.5708        | 2 | K      | 8 | 1043.4938       | 522.2505        |
|         | 383.1326        | 192.0700        | 3 | S[167] | 7 | 915.3988        | 458.2030        |
|         | 496.2167        | 248.6120        | 4 | L      | 6 | 748.4005        | 374.7039        |
|         | 593.2695        | 297.1384        | 5 | P      | 5 | 635.3164        | 318.1618        |
|         | 706.3535        | 353.6804        | 6 | I      | 4 | 538.2636        | 269.6355        |
|         | 887.3675        | 444.1874        | 7 | T[181] | 3 | 425.1796        | 213.0934        |
|         | 984.4203        | 492.7138        | 8 | P      | 2 | 244.1656        | 122.5864        |
|         |                 |                 | 9 | K      | 1 | 147.1128        | 74.0600         |

# Annotated spectra from Saleem et. al. 2009

R.SK<sub>136</sub>S<sub>167</sub>LPITTPGIR<sub>166</sub>S/2

0.7136

1e+04

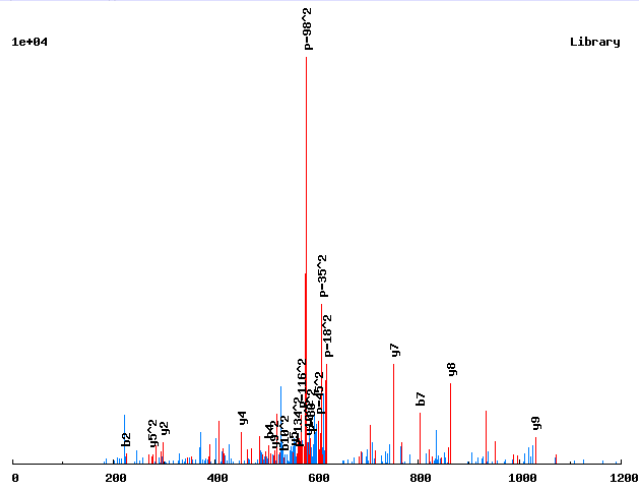

| Library | b <sup>1+</sup> | b <sup>2+</sup> | #  | AA     | #  | y <sup>1+</sup> | y <sup>2+</sup> |
|---------|-----------------|-----------------|----|--------|----|-----------------|-----------------|
|         | 88.0393         | 44.5233         | 1  | S      | 11 |                 |                 |
|         | <b>224.1485</b> | 112.5779        | 2  | K[136] | 10 | 1167.6252       | <b>584.3162</b> |
|         | 391.1468        | 196.0771        | 3  | S[167] | 9  | 1031.5160       | <b>516.2617</b> |
|         | <b>504.2309</b> | 252.6191        | 4  | L      | 8  | <b>864.5177</b> | 432.7625        |
|         | 601.2837        | 301.1455        | 5  | P      | 7  | <b>751.4336</b> | 376.2204        |
|         | 702.3313        | 351.6693        | 6  | T      | 6  | 654.3809        | 327.6941        |
|         | <b>803.3790</b> | 402.1931        | 7  | T      | 5  | <b>553.3332</b> | <b>277.1702</b> |
|         | 900.4318        | 450.7195        | 8  | P      | 4  | <b>452.2855</b> | 226.6464        |
|         | 957.4532        | 479.2303        | 9  | G      | 3  | 355.2327        | 178.1200        |
|         | 1070.5373       | <b>535.7723</b> | 10 | I      | 2  | <b>298.2113</b> | 149.6093        |
|         |                 |                 | 11 | R[166] | 1  | 185.1272        | 93.0672         |

# Annotated spectra from Saleem et. al. 2009

R.SK<sub>136</sub>S<sub>167</sub>LPT<sub>181</sub>TPGIR<sub>166</sub>S/2

0.8925

1e+04

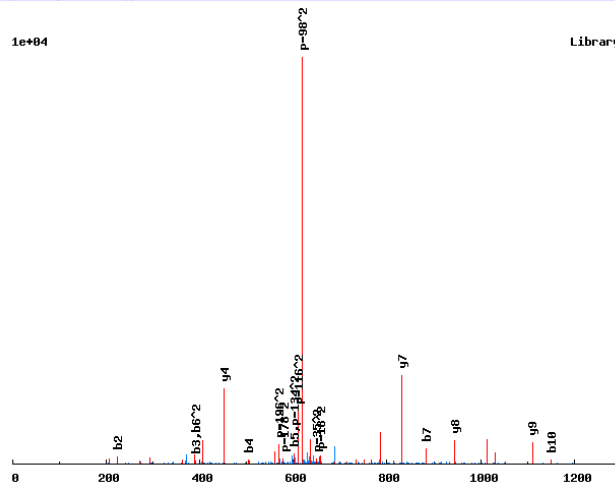

| Library | b <sup>1+</sup> | b <sup>2+</sup> | #  | AA     | #  | y <sup>1+</sup> | y <sup>2+</sup> |
|---------|-----------------|-----------------|----|--------|----|-----------------|-----------------|
|         | 88.0393         | 44.5233         | 1  | S      | 11 |                 |                 |
|         | 224.1485        | 112.5779        | 2  | K[136] | 10 | 1247.5915       | 624.2994        |
|         | 391.1468        | 196.0771        | 3  | S[167] | 9  | 1111.4824       | 556.2448        |
|         | 504.2309        | 252.6191        | 4  | L      | 8  | 944.4840        | 472.7456        |
|         | 601.2837        | 301.1455        | 5  | P      | 7  | 831.4000        | 416.2036        |
|         | 782.2977        | 391.6525        | 6  | T[181] | 6  | 734.3472        | 367.6772        |
|         | 883.3453        | 442.1763        | 7  | T      | 5  | 553.3332        | 277.1702        |
|         | 980.3981        | 490.7027        | 8  | P      | 4  | 452.2855        | 226.6464        |
|         | 1037.4196       | 519.2134        | 9  | G      | 3  | 355.2327        | 178.1200        |
|         | 1150.5036       | 575.7555        | 10 | I      | 2  | 298.2113        | 149.6093        |
|         |                 |                 | 11 | R[166] | 1  | 185.1272        | 93.0672         |

# Annotated spectra from Saleem et. al. 2009

R.SKS<sub>167</sub>NPFGSAKPVDTSQSK.I/3

0.9369

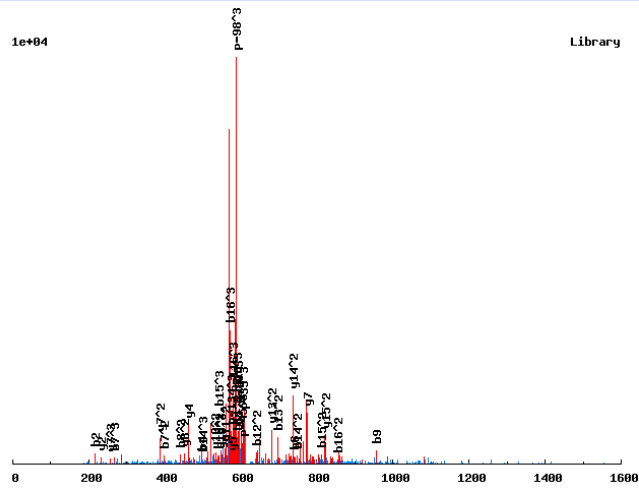

| Library | b <sup>1+</sup> | b <sup>2+</sup> | b <sup>3+</sup> | #  | AA     | #  | y <sup>1+</sup> | y <sup>2+</sup> | y <sup>3+</sup> |
|---------|-----------------|-----------------|-----------------|----|--------|----|-----------------|-----------------|-----------------|
|         | 88.0393         | 44.5233         | 30.0180         | 1  | S      | 17 |                 |                 |                 |
|         | <b>216.1343</b> | 108.5708        | 72.7163         | 2  | K      | 16 | 1770.8422       | 885.9247        | <b>590.9522</b> |
|         | 383.1326        | 192.0700        | 128.3824        | 3  | S[167] | 15 | 1642.7472       | <b>821.8773</b> | <b>548.2539</b> |
|         | <b>497.1756</b> | 249.0914        | 166.3967        | 4  | N      | 14 | 1475.7489       | <b>738.3781</b> | 492.5878        |
|         | <b>594.2283</b> | 297.6178        | 198.7476        | 5  | P      | 13 | 1361.7059       | <b>681.3566</b> | 454.5735        |
|         | <b>741.2967</b> | 371.1520        | 247.7704        | 6  | F      | 12 | 1264.6532       | 632.8302        | 422.2226        |
|         | 798.3182        | <b>399.6627</b> | <b>266.7776</b> | 7  | G      | 11 | 1117.5848       | <b>559.2960</b> | 373.1998        |
|         | 885.3502        | <b>443.1788</b> | 295.7883        | 8  | S      | 10 | 1060.5633       | <b>530.7853</b> | 354.1926        |
|         | <b>956.3873</b> | 478.6973        | 319.4673        | 9  | A      | 9  | 973.5313        | 487.2693        | 325.1819        |
|         | 1084.4823       | <b>542.7448</b> | 362.1656        | 10 | K      | 8  | 902.4942        | <b>451.7507</b> | 301.5029        |
|         | 1181.5351       | <b>591.2712</b> | 394.5165        | 11 | P      | 7  | <b>774.3992</b> | <b>387.7032</b> | <b>258.8046</b> |
|         | 1280.6035       | <b>640.8054</b> | 427.5393        | 12 | V      | 6  | 677.3464        | 339.1769        | 226.4537        |
|         | 1395.6304       | <b>698.3188</b> | 465.8817        | 13 | D      | 5  | <b>578.2780</b> | 289.6427        | 193.4309        |
|         | 1496.6781       | <b>748.8427</b> | <b>499.5642</b> | 14 | T      | 4  | <b>463.2511</b> | 232.1292        | 155.0885        |
|         | 1624.7367       | <b>812.8720</b> | <b>542.2504</b> | 15 | Q      | 3  | 362.2034        | 181.6053        | 121.4060        |
|         | 1711.7687       | <b>856.3880</b> | <b>571.2611</b> | 16 | S      | 2  | <b>234.1448</b> | 117.5761        | 78.7198         |
|         |                 |                 |                 | 17 | K      | 1  | 147.1128        | 74.0600         | 49.7091         |

# Annotated spectra from Saleem et. al. 2009

K.SKSS<sub>167</sub>GVS<sub>167</sub>SPLSR.M/2

0.9528

1e+04

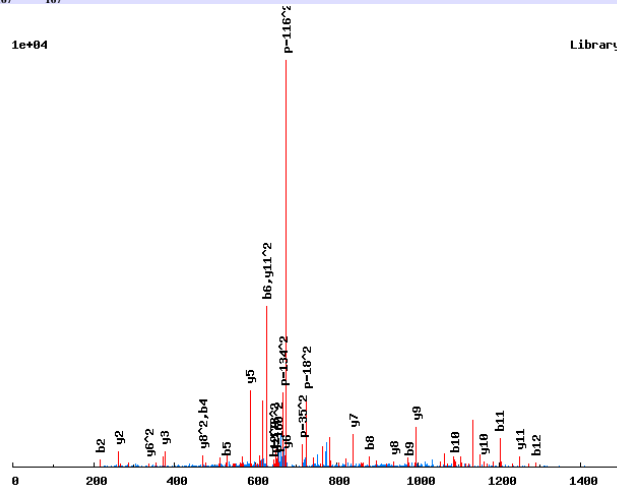

| Library | b <sup>1+</sup>  | b <sup>2+</sup> | #  | AA     | #  | y <sup>1+</sup>  | y <sup>2+</sup> |
|---------|------------------|-----------------|----|--------|----|------------------|-----------------|
|         | 88.0393          | 44.5233         | 1  | S      | 13 |                  |                 |
|         | <b>216.1343</b>  | 108.5708        | 2  | K      | 12 | 1377.6175        | 689.3124        |
|         | 303.1663         | 152.0868        | 3  | S      | 11 | <b>1249.5225</b> | <b>625.2649</b> |
|         | <b>470.1647</b>  | 235.5860        | 4  | S[167] | 10 | <b>1162.4905</b> | 581.7489        |
|         | <b>527.1861</b>  | 264.0967        | 5  | G      | 9  | <b>995.4921</b>  | 498.2497        |
|         | <b>626.2545</b>  | 313.6309        | 6  | V      | 8  | <b>938.4707</b>  | <b>469.7390</b> |
|         | 793.2529         | 397.1301        | 7  | S[167] | 7  | <b>839.4023</b>  | 420.2048        |
|         | <b>880.2849</b>  | 440.6461        | 8  | S      | 6  | <b>672.4039</b>  | <b>336.7056</b> |
|         | <b>977.3377</b>  | 489.1725        | 9  | P      | 5  | <b>585.3719</b>  | 293.1896        |
|         | <b>1090.4217</b> | 545.7145        | 10 | L      | 4  | 488.3191         | 244.6632        |
|         | <b>1203.5058</b> | 602.2565        | 11 | L      | 3  | <b>375.2350</b>  | 188.1212        |
|         | <b>1290.5378</b> | <b>645.7726</b> | 12 | S      | 2  | <b>262.1510</b>  | 131.5791        |
|         |                  |                 | 13 | R      | 1  | 175.1190         | 88.0631         |

# Annotated spectra from Saleem et. al. 2009

K.SK<sub>136</sub>VDDLK<sub>166</sub>S<sub>167</sub>DEDEHGTVAQEK<sub>136</sub>H/3

0.8122

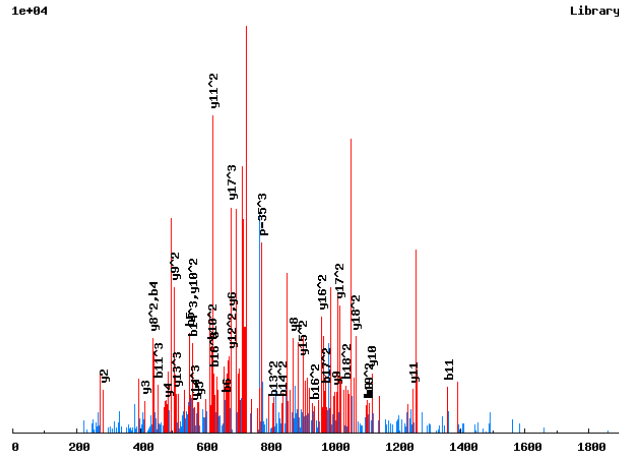

| Library | b <sup>1+</sup> | b <sup>2+</sup> | b <sup>3+</sup> | #  | AA     | #  | y <sup>1+</sup> | y <sup>2+</sup> | y <sup>3+</sup> |
|---------|-----------------|-----------------|-----------------|----|--------|----|-----------------|-----------------|-----------------|
|         | 88.0393         | 44.5233         | 30.0180         | 1  | S      | 20 |                 |                 |                 |
|         | 224.1485        | 112.5779        | 75.3877         | 2  | K[136] | 19 | 2277.0240       | 1139.0157       | 759.6795        |
|         | 323.2169        | 162.1121        | 108.4105        | 3  | V      | 18 | 2140.9149       | 1070.9611       | 714.3098        |
|         | 438.2438        | 219.6255        | 146.7528        | 4  | D      | 17 | 2041.8465       | 1021.4269       | 681.2870        |
|         | 553.2708        | 277.1390        | 185.0951        | 5  | D      | 16 | 1926.8195       | 963.9134        | 642.9447        |
|         | 666.3548        | 333.6810        | 222.7898        | 6  | L      | 15 | 1811.7926       | 906.3999        | 604.6024        |
|         | 832.4642        | 416.7357        | 278.1596        | 7  | R[166] | 14 | 1698.7085       | 849.8579        | 566.9077        |
|         | 999.4626        | 500.2349        | 333.8257        | 8  | S[167] | 13 | 1532.5992       | 766.8032        | 511.5379        |
|         | 1114.4895       | 557.7484        | 372.1680        | 9  | D      | 12 | 1365.6008       | 683.3040        | 455.8718        |
|         | 1243.5321       | 622.2697        | 415.1822        | 10 | E      | 11 | 1250.5739       | 625.7906        | 417.5295        |
|         | 1358.5590       | 679.7832        | 453.5245        | 11 | D      | 10 | 1121.5313       | 561.2693        | 374.5153        |
|         | 1487.6016       | 744.3044        | 496.5387        | 12 | E      | 9  | 1006.5043       | 503.7558        | 336.1730        |
|         | 1624.6605       | 812.8339        | 542.2250        | 13 | H      | 8  | 877.4617        | 439.2345        | 293.1588        |
|         | 1681.6820       | 841.3446        | 561.2322        | 14 | G      | 7  | 740.4028        | 370.7051        | 247.4725        |
|         | 1782.7297       | 891.8685        | 594.9147        | 15 | T      | 6  | 683.3814        | 342.1943        | 228.4653        |
|         | 1881.7981       | 941.4027        | 627.9375        | 16 | V      | 5  | 582.3337        | 291.6705        | 194.7827        |
|         | 1952.8352       | 976.9212        | 651.6166        | 17 | A      | 4  | 483.2653        | 242.1363        | 161.7599        |
|         | 2080.8938       | 1040.9505       | 694.3028        | 18 | Q      | 3  | 412.2282        | 206.6177        | 138.0809        |
|         | 2209.9364       | 1105.4718       | 737.3170        | 19 | E      | 2  | 284.1696        | 142.5884        | 95.3947         |
|         |                 |                 |                 | 20 | K[136] | 1  | 155.1270        | 78.0671         | 52.3805         |



# Annotated spectra from Saleem et. al. 2009

R.S<sub>167</sub>K<sub>136</sub>VNT<sub>181</sub>PAIDDYGNLITVER<sub>166</sub>R/3

0.9999

1e+04

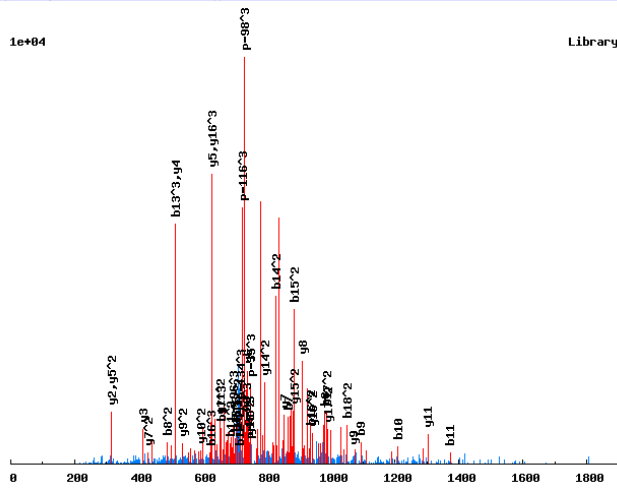

| Library | b <sup>1+</sup> | b <sup>2+</sup> | b <sup>3+</sup> | #  | AA | #   | y <sup>1+</sup> | y <sup>2+</sup> | y <sup>3+</sup> |          |
|---------|-----------------|-----------------|-----------------|----|----|-----|-----------------|-----------------|-----------------|----------|
|         | 168.0056        | 84.5065         | 56.6734         | 1  | S  | 167 | 19              |                 |                 |          |
|         | 304.1148        | 152.5610        | 102.0431        | 2  | K  | 136 | 18              | 2116.0441       | 1058.5257       | 706.0195 |
|         | 403.1832        | 202.0952        | 135.0659        | 3  | V  | 17  | 17              | 1979.9349       | 990.4711        | 660.6498 |
|         | 517.2261        | 259.1167        | 173.0802        | 4  | N  | 16  | 16              | 1880.8665       | 940.9369        | 627.6270 |
|         | 698.2402        | 349.6237        | 233.4182        | 5  | T  | 181 | 15              | 1766.8236       | 883.9154        | 589.6127 |
|         | 795.2929        | 398.1501        | 265.7692        | 6  | P  | 14  | 14              | 1585.8095       | 793.4084        | 529.2747 |
|         | 866.3300        | 433.6687        | 289.4482        | 7  | A  | 13  | 13              | 1488.7568       | 744.8820        | 496.9238 |
|         | 979.4141        | 490.2107        | 327.1429        | 8  | I  | 12  | 12              | 1417.7197       | 709.3635        | 473.2447 |
|         | 1094.4410       | 547.7242        | 365.4852        | 9  | D  | 11  | 11              | 1304.6356       | 652.8214        | 435.5501 |
|         | 1209.4680       | 605.2376        | 403.8275        | 10 | D  | 10  | 10              | 1189.6087       | 595.3080        | 397.2077 |
|         | 1372.5313       | 686.7693        | 458.1820        | 11 | Y  | 9   | 9               | 1074.5817       | 537.7945        | 358.8654 |
|         | 1429.5528       | 715.2800        | 477.1891        | 12 | G  | 8   | 8               | 911.5184        | 456.2628        | 304.5110 |
|         | 1543.5957       | 772.3015        | 515.2034        | 13 | N  | 7   | 7               | 854.4969        | 427.7521        | 285.5038 |
|         | 1656.6797       | 828.8435        | 552.8981        | 14 | L  | 6   | 6               | 740.4540        | 370.7306        | 247.4895 |
|         | 1769.7638       | 885.3855        | 590.5928        | 15 | I  | 5   | 5               | 627.3700        | 314.1886        | 209.7948 |
|         | 1870.8115       | 935.9094        | 624.2753        | 16 | T  | 4   | 4               | 514.2859        | 257.6466        | 172.1002 |
|         | 1969.8799       | 985.4436        | 657.2982        | 17 | V  | 3   | 3               | 413.2382        | 207.1227        | 138.4176 |
|         | 2098.9225       | 1049.9649       | 700.3123        | 18 | E  | 2   | 2               | 314.1698        | 157.5885        | 105.3948 |
|         |                 |                 |                 | 19 | R  | 166 | 1               | 185.1272        | 93.0672         | 62.3806  |

# Annotated spectra from Saleem et. al. 2009

R.S<sub>16</sub><sup>7</sup>KVNT<sub>181</sub>PAIDENGLAIVGETK.N/3

0.9994

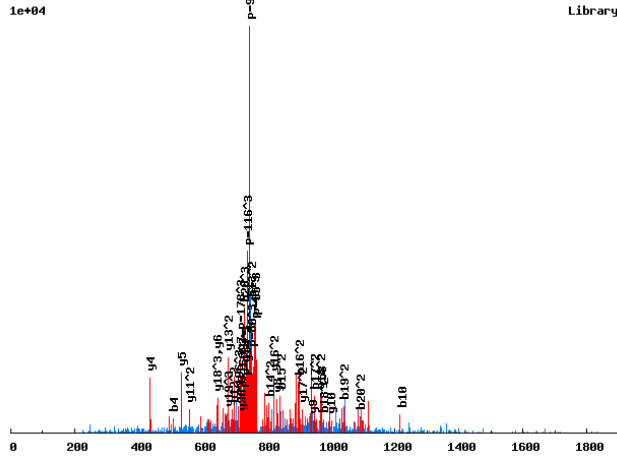

| Library | b <sup>1+</sup> | b <sup>2+</sup> | b <sup>3+</sup> | #  | AA     | #  | y <sup>1+</sup> | y <sup>2+</sup> | y <sup>3+</sup> |
|---------|-----------------|-----------------|-----------------|----|--------|----|-----------------|-----------------|-----------------|
|         | 168.0056        | 84.5065         | 56.6734         | 1  | S[167] | 21 |                 |                 |                 |
|         | 296.1006        | 148.5539        | 99.3717         | 2  | K      | 20 | 2163.0693       | 1082.0383       | 721.6946        |
|         | 395.1690        | 198.0881        | 132.3945        | 3  | V      | 19 | 2034.9743       | 1017.9908       | 678.9963        |
|         | 509.2119        | 255.1096        | 170.4088        | 4  | N      | 18 | 1935.9059       | 968.4566        | 645.9735        |
|         | 690.2260        | 345.6166        | 230.7468        | 5  | T[181] | 17 | 1821.8630       | 911.4351        | 607.9592        |
|         | 787.2787        | 394.1430        | 263.0978        | 6  | P      | 16 | 1640.8489       | 820.9281        | 547.6212        |
|         | 858.3158        | 429.6616        | 286.7768        | 7  | A      | 15 | 1543.7962       | 772.4017        | 515.2702        |
|         | 971.3999        | 486.2036        | 324.4715        | 8  | I      | 14 | 1472.7591       | 736.8832        | 491.5912        |
|         | 1086.4268       | 543.7171        | 362.8138        | 9  | D      | 13 | 1359.6750       | 680.3411        | 453.8965        |
|         | 1215.4694       | 608.2383        | 405.8280        | 10 | E      | 12 | 1244.6481       | 622.8277        | 415.5542        |
|         | 1329.5123       | 665.2598        | 443.8423        | 11 | N      | 11 | 1115.6055       | 558.3064        | 372.5400        |
|         | 1386.5338       | 693.7705        | 462.8495        | 12 | G      | 10 | 1001.5626       | 501.2849        | 334.5257        |
|         | 1500.5767       | 750.7920        | 500.8638        | 13 | N      | 9  | 944.5411        | 472.7742        | 315.5186        |
|         | 1613.6608       | 807.3340        | 538.5585        | 14 | L      | 8  | 830.4982        | 415.7527        | 277.5042        |
|         | 1684.6979       | 842.8526        | 562.2375        | 15 | A      | 7  | 717.4141        | 359.2107        | 239.8096        |
|         | 1797.7820       | 899.3946        | 599.9322        | 16 | I      | 6  | 646.3770        | 323.6921        | 216.1305        |
|         | 1896.8504       | 948.9288        | 632.9550        | 17 | V      | 5  | 533.2929        | 267.1501        | 178.4358        |
|         | 1953.8718       | 977.4396        | 651.9621        | 18 | G      | 4  | 434.2245        | 217.6159        | 145.4130        |
|         | 2082.9144       | 1041.9609       | 694.9763        | 19 | E      | 3  | 377.2031        | 189.1052        | 126.4059        |
|         | 2183.9621       | 1092.4847       | 728.6589        | 20 | T      | 2  | 248.1605        | 124.5839        | 83.3917         |
|         |                 |                 |                 | 21 | K      | 1  | 147.1128        | 74.0600         | 49.7091         |

# Annotated spectra from Saleem et. al. 2009

R.S<sub>167</sub>LDVVRTS<sub>167</sub>GER.V/2

0.797

1e+04

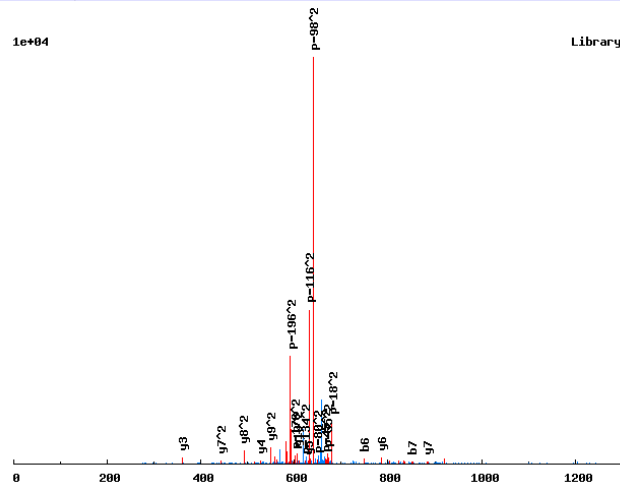

| Library | b <sup>1+</sup> | b <sup>2+</sup> | #  | AA      | #  | y <sup>1+</sup> | y <sup>2+</sup> |
|---------|-----------------|-----------------|----|---------|----|-----------------|-----------------|
|         | 168.0056        | 84.5065         | 1  | S [167] | 11 |                 |                 |
|         | 281.0897        | 141.0485        | 2  | L       | 10 | 1211.5780       | 606.2926        |
|         | 396.1166        | 198.5620        | 3  | D       | 9  | 1098.4939       | 549.7506        |
|         | 495.1851        | 248.0962        | 4  | V       | 8  | 983.4670        | 492.2371        |
|         | 594.2535        | 297.6304        | 5  | V       | 7  | 884.3986        | 442.7029        |
|         | 750.3546        | 375.6809        | 6  | R       | 6  | 785.3302        | 393.1687        |
|         | 851.4023        | 426.2048        | 7  | T       | 5  | 629.2290        | 315.1182        |
|         | 1018.4006       | 509.7039        | 8  | S [167] | 4  | 528.1814        | 264.5943        |
|         | 1075.4221       | 538.2147        | 9  | G       | 3  | 361.1830        | 181.0951        |
|         | 1204.4647       | 602.7360        | 10 | E       | 2  | 304.1615        | 152.5844        |
|         |                 |                 | 11 | R       | 1  | 175.1190        | 88.0631         |

# Annotated spectra from Saleem et. al. 2009

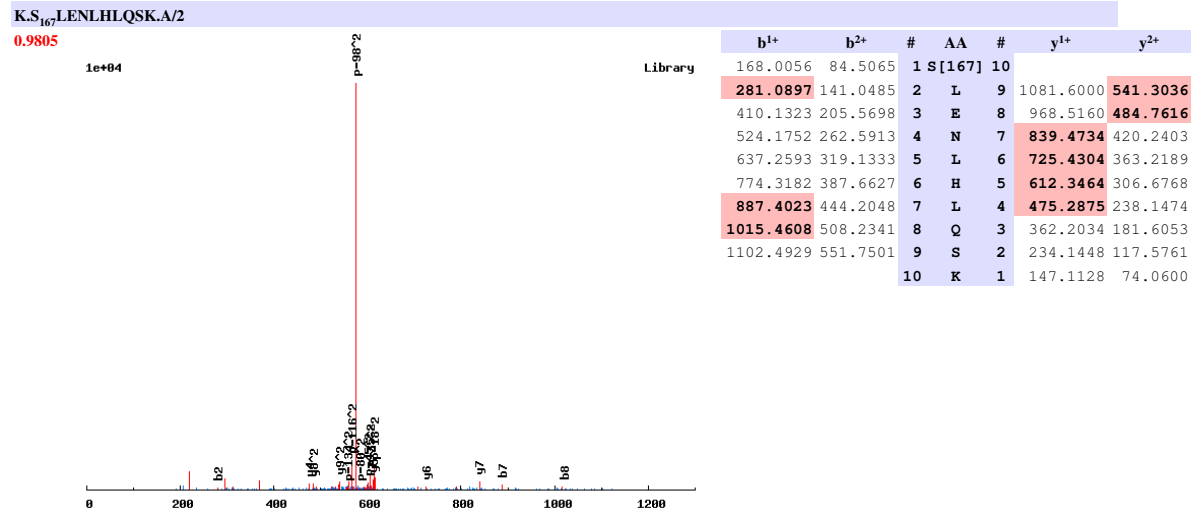

# Annotated spectra from Saleem et. al. 2009

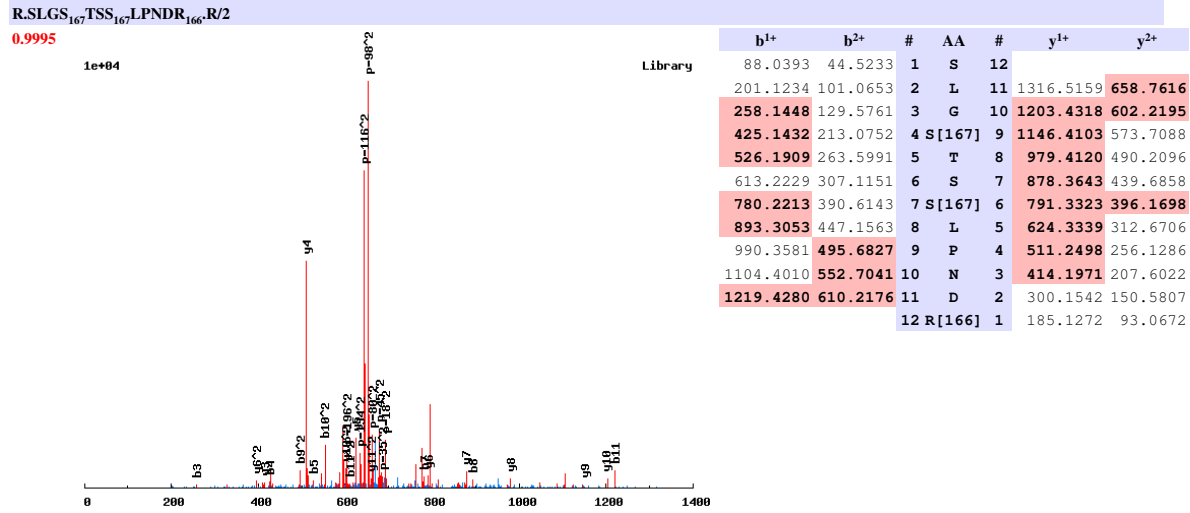

# Annotated spectra from Saleem et. al. 2009

R.S<sub>16</sub>LLRDEEDVEGTDGR.R/2

0.8414

1e+04

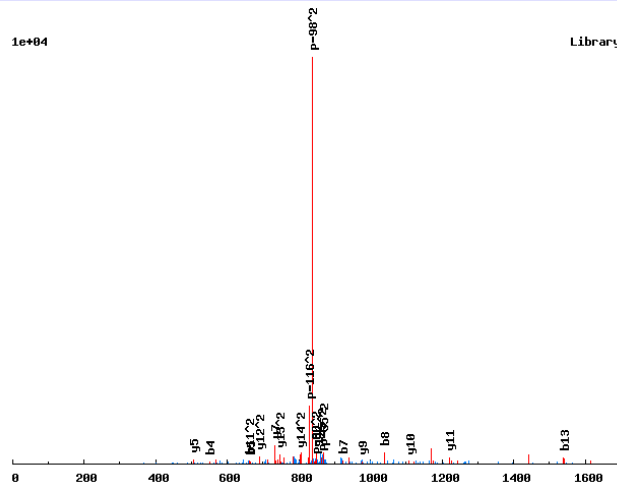

| Library | b <sup>1+</sup> | b <sup>2+</sup> | #  | AA | #     | y <sup>1+</sup> | y <sup>2+</sup> |
|---------|-----------------|-----------------|----|----|-------|-----------------|-----------------|
|         | 168.0056        | 84.5065         | 1  | S  | [167] | 15              |                 |
|         | 281.0897        | 141.0485        | 2  | L  | 14    | 1603.7558       | 802.3815        |
|         | 394.1738        | 197.5905        | 3  | L  | 13    | 1490.6717       | 745.8395        |
|         | 550.2749        | 275.6411        | 4  | R  | 12    | 1377.5877       | 689.2975        |
|         | 665.3018        | 333.1545        | 5  | D  | 11    | 1221.4866       | 611.2469        |
|         | 794.3444        | 397.6758        | 6  | E  | 10    | 1106.4596       | 553.7334        |
|         | 923.3870        | 462.1971        | 7  | E  | 9     | 977.4170        | 489.2122        |
|         | 1038.4139       | 519.7106        | 8  | D  | 8     | 848.3744        | 424.6909        |
|         | 1137.4823       | 569.2448        | 9  | V  | 7     | 733.3475        | 367.1774        |
|         | 1266.5249       | 633.7661        | 10 | E  | 6     | 634.2791        | 317.6432        |
|         | 1323.5464       | 662.2768        | 11 | G  | 5     | 505.2365        | 253.1219        |
|         | 1424.5941       | 712.8007        | 12 | T  | 4     | 448.2150        | 224.6112        |
|         | 1539.6210       | 770.3141        | 13 | D  | 3     | 347.1673        | 174.0873        |
|         | 1596.6425       | 798.8249        | 14 | G  | 2     | 232.1404        | 116.5738        |
|         |                 |                 | 15 | R  | 1     | 175.1190        | 88.0631         |

# Annotated spectra from Saleem et. al. 2009

R.S<sub>167</sub>L.S<sub>167</sub>GLDLQ<sub>136</sub>NK<sub>136</sub>K<sub>136</sub>N/2

0.9635

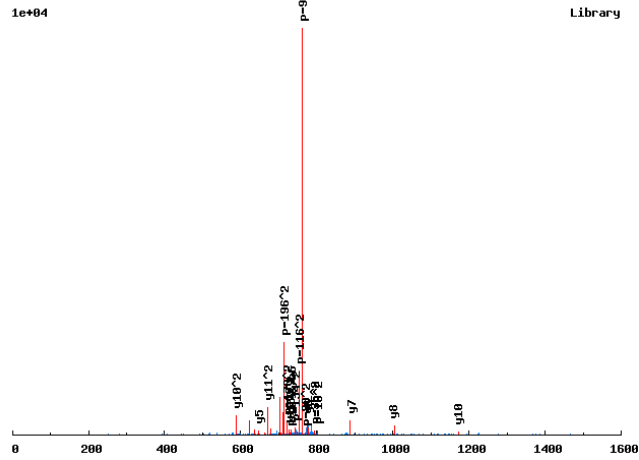

| Library | b <sup>1+</sup> | b <sup>2+</sup> | #  | AA | #        | y <sup>1+</sup> | y <sup>2+</sup> |
|---------|-----------------|-----------------|----|----|----------|-----------------|-----------------|
|         | 168.0056        | 84.5065         | 1  | S  | [167] 13 |                 |                 |
|         | 281.0897        | 141.0485        | 2  | L  | 12       | 1453.7381       | 727.3727        |
|         | 448.0881        | 224.5477        | 3  | S  | [167] 11 | 1340.6541       | 670.8307        |
|         | 505.1095        | 253.0584        | 4  | G  | 10       | 1173.6557       | 587.3315        |
|         | 618.1936        | 309.6004        | 5  | L  | 9        | 1116.6342       | 558.8208        |
|         | 733.2205        | 367.1139        | 6  | D  | 8        | 1003.5502       | 502.2787        |
|         | 846.3046        | 423.6559        | 7  | L  | 7        | 888.5232        | 444.7653        |
|         | 974.3632        | 487.6852        | 8  | Q  | 6        | 775.4392        | 388.2232        |
|         | 1088.4061       | 544.7067        | 9  | N  | 5        | 647.3806        | 324.1939        |
|         | 1216.4647       | 608.7360        | 10 | Q  | 4        | 533.3377        | 267.1725        |
|         | 1330.5076       | 665.7574        | 11 | N  | 3        | 405.2791        | 203.1432        |
|         | 1466.6168       | 733.8120        | 12 | K  | [136] 2  | 291.2362        | 146.1217        |
|         |                 |                 | 13 | K  | [136] 1  | 155.1270        | 78.0671         |

0.9635

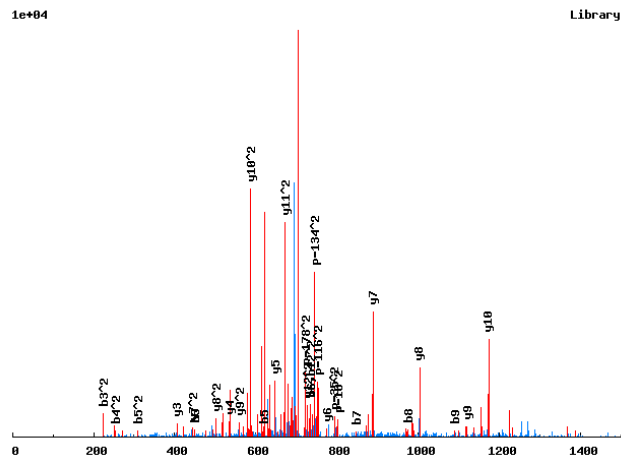

| Library | b <sup>1+</sup> | b <sup>2+</sup> | #  | AA | #        | y <sup>1+</sup> | y <sup>2+</sup> |
|---------|-----------------|-----------------|----|----|----------|-----------------|-----------------|
|         | 168.0056        | 84.5065         | 1  | S  | [167] 13 |                 |                 |
|         | 281.0897        | 141.0485        | 2  | L  | 12       | 1453.7381       | 727.3727        |
|         | 448.0881        | 224.5477        | 3  | S  | [167] 11 | 1340.6541       | 670.8307        |
|         | 505.1095        | 253.0584        | 4  | G  | 10       | 1173.6557       | 587.3315        |
|         | 618.1936        | 309.6004        | 5  | L  | 9        | 1116.6342       | 558.8208        |
|         | 733.2205        | 367.1139        | 6  | D  | 8        | 1003.5502       | 502.2787        |
|         | 846.3046        | 423.6559        | 7  | L  | 7        | 888.5232        | 444.7653        |
|         | 974.3632        | 487.6852        | 8  | Q  | 6        | 775.4392        | 388.2232        |
|         | 1088.4061       | 544.7067        | 9  | N  | 5        | 647.3806        | 324.1939        |
|         | 1216.4647       | 608.7360        | 10 | Q  | 4        | 533.3377        | 267.1725        |
|         | 1330.5076       | 665.7574        | 11 | N  | 3        | 405.2791        | 203.1432        |
|         | 1466.6168       | 733.8120        | 12 | K  | [136] 2  | 291.2362        | 146.1217        |
|         |                 |                 | 13 | K  | [136] 1  | 155.1270        | 78.0671         |

# Annotated spectra from Saleem et. al. 2009

R.SLS<sub>167</sub>GLPLTHDK.T/2

0.6124

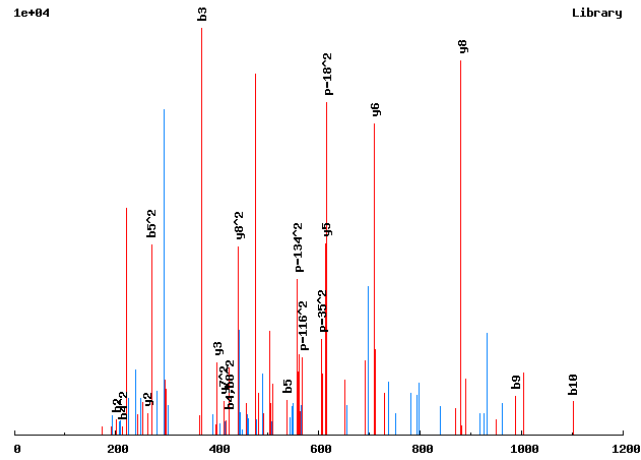

| Library | b <sup>1+</sup> | b <sup>2+</sup> | #  | AA     | #  | y <sup>1+</sup> | y <sup>2+</sup> |
|---------|-----------------|-----------------|----|--------|----|-----------------|-----------------|
|         | 88.0393         | 44.5233         | 1  | S      | 11 |                 |                 |
|         | 201.1234        | 101.0653        | 2  | L      | 10 | 1160.5711       | 580.7892        |
|         | 368.1217        | 184.5645        | 3  | S[167] | 9  | 1047.4870       | 524.2472        |
|         | 425.1432        | 213.0752        | 4  | G      | 8  | 880.4887        | 440.7480        |
|         | 538.2273        | 269.6173        | 5  | L      | 7  | 823.4672        | 412.2372        |
|         | 635.2800        | 318.1436        | 6  | P      | 6  | 710.3832        | 355.6952        |
|         | 748.3641        | 374.6857        | 7  | L      | 5  | 613.3304        | 307.1688        |
|         | 849.4118        | 425.2095        | 8  | T      | 4  | 500.2463        | 250.6268        |
|         | 986.4707        | 493.7390        | 9  | H      | 3  | 399.1986        | 200.1030        |
|         | 1101.4976       | 551.2524        | 10 | D      | 2  | 262.1397        | 131.5735        |
|         |                 |                 | 11 | K      | 1  | 147.1128        | 74.0600         |





# Annotated spectra from Saleem et. al. 2009

K.S<sub>167</sub>LS<sub>167</sub>HSGLDDGLEQLNRS/3

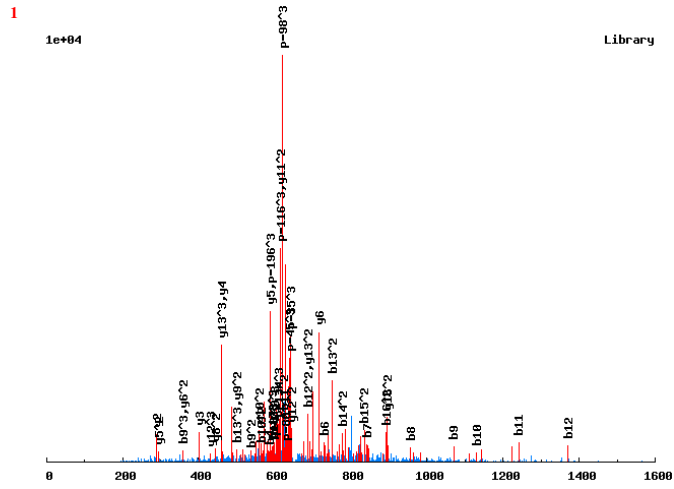

| Library | b <sup>1+</sup> | b <sup>2+</sup> | b <sup>3+</sup> | #  | AA | #     | y <sup>1+</sup> | y <sup>2+</sup> | y <sup>3+</sup> |          |
|---------|-----------------|-----------------|-----------------|----|----|-------|-----------------|-----------------|-----------------|----------|
|         | 168.0056        | 84.5065         | 56.6734         | 1  | S  | [167] | 17              |                 |                 |          |
|         | 281.0897        | 141.0485        | 94.3681         | 2  | L  | 16    | 1790.8069       | 895.9071        | 597.6071        |          |
|         | 448.0881        | 224.5477        | 150.0342        | 3  | S  | [167] | 15              | 1677.7228       | 839.3650        | 559.9125 |
|         | 585.1470        | 293.0771        | 195.7205        | 4  | H  | 14    | 1510.7244       | 755.8659        | 504.2463        |          |
|         | 672.1790        | 336.5931        | 224.7312        | 5  | S  | 13    | 1373.6655       | 687.3364        | 458.5600        |          |
|         | 729.2005        | 365.1039        | 243.7383        | 6  | G  | 12    | 1286.6335       | 643.8204        | 429.5494        |          |
|         | 842.2845        | 421.6459        | 281.4330        | 7  | L  | 11    | 1229.6120       | 615.3097        | 410.5422        |          |
|         | 957.3115        | 479.1594        | 319.7753        | 8  | D  | 10    | 1116.5280       | 558.7676        | 372.8475        |          |
|         | 1072.3384       | 536.6728        | 358.1177        | 9  | D  | 9     | 1001.5010       | 501.2542        | 334.5052        |          |
|         | 1129.3599       | 565.1836        | 377.1248        | 10 | G  | 8     | 886.4741        | 443.7407        | 296.1629        |          |
|         | 1242.4439       | 621.7256        | 414.8195        | 11 | L  | 7     | 829.4526        | 415.2300        | 277.1557        |          |
|         | 1371.4865       | 686.2469        | 457.8337        | 12 | E  | 6     | 716.3686        | 358.6879        | 239.4610        |          |
|         | 1499.5451       | 750.2762        | 500.5199        | 13 | Q  | 5     | 587.3260        | 294.1666        | 196.4468        |          |
|         | 1556.5666       | 778.7869        | 519.5270        | 14 | G  | 4     | 459.2674        | 230.1373        | 153.7607        |          |
|         | 1669.6506       | 835.3289        | 557.2217        | 15 | L  | 3     | 402.2459        | 201.6266        | 134.7535        |          |
|         | 1783.6935       | 892.3504        | 595.2360        | 16 | N  | 2     | 289.1619        | 145.0846        | 97.0588         |          |
|         |                 |                 |                 | 17 | R  | 1     | 175.1190        | 88.0631         | 59.0445         |          |

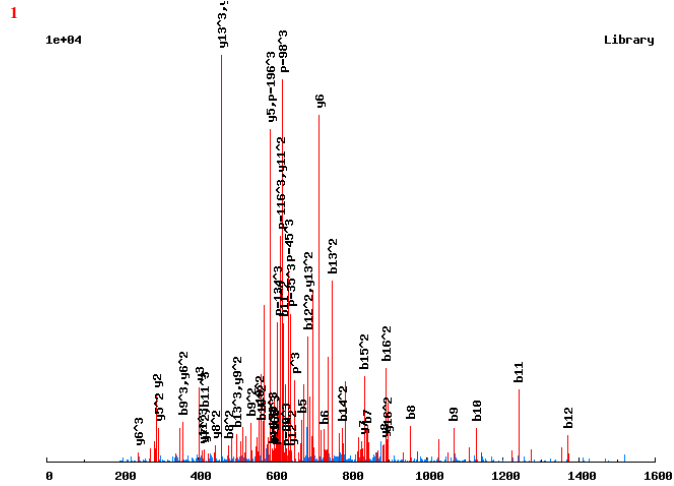

| Library | b <sup>1+</sup> | b <sup>2+</sup> | b <sup>3+</sup> | #  | AA | #     | y <sup>1+</sup> | y <sup>2+</sup> | y <sup>3+</sup> |          |
|---------|-----------------|-----------------|-----------------|----|----|-------|-----------------|-----------------|-----------------|----------|
|         | 168.0056        | 84.5065         | 56.6734         | 1  | S  | [167] | 17              |                 |                 |          |
|         | 281.0897        | 141.0485        | 94.3681         | 2  | L  | 16    | 1790.8069       | 895.9071        | 597.6071        |          |
|         | 448.0881        | 224.5477        | 150.0342        | 3  | S  | [167] | 15              | 1677.7228       | 839.3650        | 559.9125 |
|         | 585.1470        | 293.0771        | 195.7205        | 4  | H  | 14    | 1510.7244       | 755.8659        | 504.2463        |          |
|         | 672.1790        | 336.5931        | 224.7312        | 5  | S  | 13    | 1373.6655       | 687.3364        | 458.5600        |          |
|         | 729.2005        | 365.1039        | 243.7383        | 6  | G  | 12    | 1286.6335       | 643.8204        | 429.5494        |          |
|         | 842.2845        | 421.6459        | 281.4330        | 7  | L  | 11    | 1229.6120       | 615.3097        | 410.5422        |          |
|         | 957.3115        | 479.1594        | 319.7753        | 8  | D  | 10    | 1116.5280       | 558.7676        | 372.8475        |          |
|         | 1072.3384       | 536.6728        | 358.1177        | 9  | D  | 9     | 1001.5010       | 501.2542        | 334.5052        |          |
|         | 1129.3599       | 565.1836        | 377.1248        | 10 | G  | 8     | 886.4741        | 443.7407        | 296.1629        |          |
|         | 1242.4439       | 621.7256        | 414.8195        | 11 | L  | 7     | 829.4526        | 415.2300        | 277.1557        |          |
|         | 1371.4865       | 686.2469        | 457.8337        | 12 | E  | 6     | 716.3686        | 358.6879        | 239.4610        |          |
|         | 1499.5451       | 750.2762        | 500.5199        | 13 | Q  | 5     | 587.3260        | 294.1666        | 196.4468        |          |
|         | 1556.5666       | 778.7869        | 519.5270        | 14 | G  | 4     | 459.2674        | 230.1373        | 153.7607        |          |
|         | 1669.6506       | 835.3289        | 557.2217        | 15 | L  | 3     | 402.2459        | 201.6266        | 134.7535        |          |
|         | 1783.6935       | 892.3504        | 595.2360        | 16 | N  | 2     | 289.1619        | 145.0846        | 97.0588         |          |
|         |                 |                 |                 | 17 | R  | 1     | 175.1190        | 88.0631         | 59.0445         |          |

# Annotated spectra from Saleem et. al. 2009

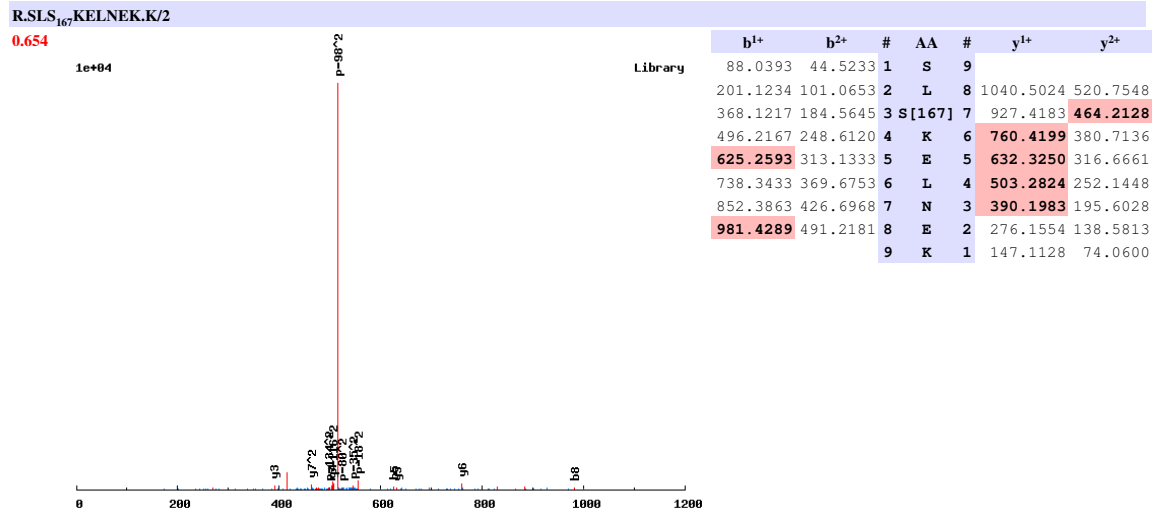

# Annotated spectra from Saleem et. al. 2009

R.SLS<sub>167</sub>LHAR<sub>166</sub>D/2

0.6668

1e+04

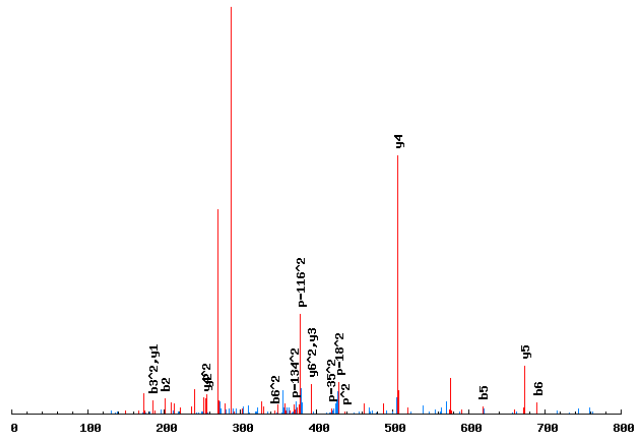

Library

| b <sup>1+</sup> | b <sup>2+</sup> | # | AA     | # | y <sup>1+</sup> | y <sup>2+</sup> |          |         |
|-----------------|-----------------|---|--------|---|-----------------|-----------------|----------|---------|
| 88.0393         | 44.5233         | 1 | S      | 7 |                 |                 |          |         |
| 201.1234        | 101.0653        | 2 | L      | 6 | 786.3897        | 393.6985        |          |         |
| 368.1217        | 184.5645        | 3 | S[167] | 5 | 673.3057        | 337.1565        |          |         |
| 481.2058        | 241.1065        | 4 | L      | 4 | 506.3073        | 253.6573        |          |         |
| 618.2647        | 309.6360        | 5 | H      | 3 | 393.2232        | 197.1153        |          |         |
| 689.3018        | 345.1545        | 6 | A      | 2 | 256.1643        | 128.5858        |          |         |
|                 |                 |   |        | 7 | R[166]          | 1               | 185.1272 | 93.0672 |

# Annotated spectra from Saleem et. al. 2009

R.S<sub>167</sub>L.SLPS<sub>167</sub>SGADAVK.R/2

0.7257

1e+04

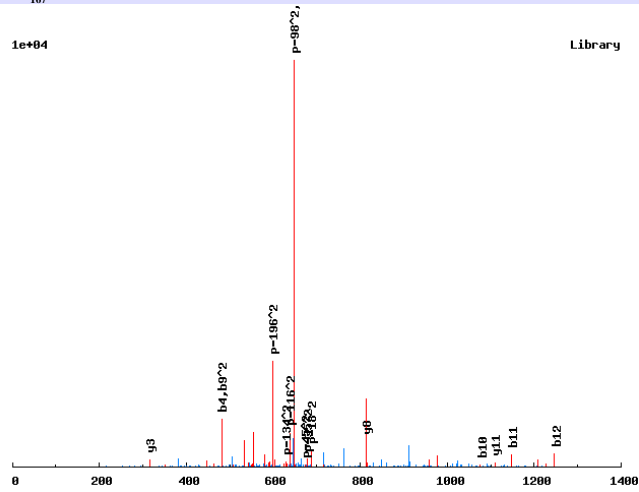

| Library | b <sup>1+</sup> | b <sup>2+</sup> | #  | AA | #     | y <sup>1+</sup> | y <sup>2+</sup> |          |
|---------|-----------------|-----------------|----|----|-------|-----------------|-----------------|----------|
|         | 168.0056        | 84.5065         | 1  | S  | [167] | 13              |                 |          |
|         | 281.0897        | 141.0485        | 2  | L  | 12    | 1224.5871       | 612.7972        |          |
|         | 368.1217        | 184.5645        | 3  | S  | 11    | 1111.5031       | 556.2552        |          |
|         | 481.2058        | 241.1065        | 4  | L  | 10    | 1024.4710       | 512.7392        |          |
|         | 578.2586        | 289.6329        | 5  | P  | 9     | 911.3870        | 456.1971        |          |
|         | 745.2569        | 373.1321        | 6  | S  | [167] | 8               | 814.3342        | 407.6708 |
|         | 832.2889        | 416.6481        | 7  | S  | 7     | 647.3359        | 324.1716        |          |
|         | 889.3104        | 445.1588        | 8  | G  | 6     | 560.3038        | 280.6556        |          |
|         | 960.3475        | 480.6774        | 9  | A  | 5     | 503.2824        | 252.1448        |          |
|         | 1075.3745       | 538.1909        | 10 | D  | 4     | 432.2453        | 216.6263        |          |
|         | 1146.4116       | 573.7094        | 11 | A  | 3     | 317.2183        | 159.1128        |          |
|         | 1245.4800       | 623.2436        | 12 | V  | 2     | 246.1812        | 123.5942        |          |
|         |                 |                 | 13 | K  | 1     | 147.1128        | 74.0600         |          |

# Annotated spectra from Saleem et. al. 2009

R.SLS<sub>167</sub>LS<sub>167</sub>PC<sub>160</sub>TR.A/2

0.943

1e+04

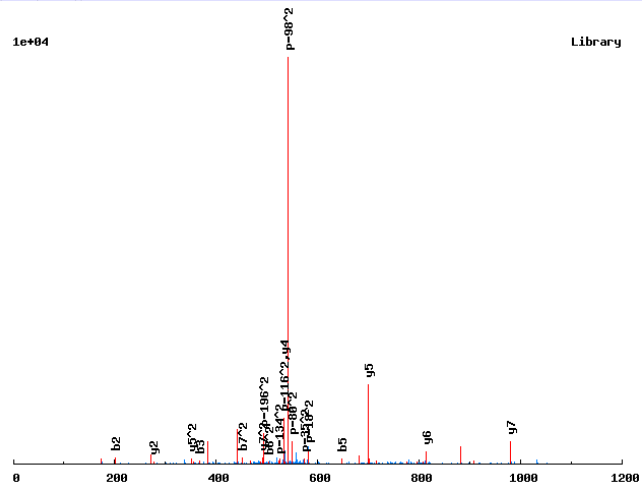

| Library | b <sup>1+</sup> | b <sup>2+</sup> | # | AA     | # | y <sup>1+</sup> | y <sup>2+</sup> |
|---------|-----------------|-----------------|---|--------|---|-----------------|-----------------|
|         | 88.0393         | 44.5233         | 1 | S      | 9 |                 |                 |
|         | 201.1234        | 101.0653        | 2 | L      | 8 | 1093.4149       | 547.2111        |
|         | 368.1217        | 184.5645        | 3 | S[167] | 7 | 980.3308        | 490.6691        |
|         | 481.2058        | 241.1065        | 4 | L      | 6 | 813.3325        | 407.1699        |
|         | 648.2042        | 324.6057        | 5 | S[167] | 5 | 700.2484        | 350.6278        |
|         | 745.2569        | 373.1321        | 6 | P      | 4 | 533.2500        | 267.1287        |
|         | 905.2876        | 453.1474        | 7 | C[160] | 3 | 436.1973        | 218.6023        |
|         | 1006.3352       | 503.6713        | 8 | T      | 2 | 276.1666        | 138.5870        |
|         |                 |                 | 9 | R      | 1 | 175.1190        | 88.0631         |

# Annotated spectra from Saleem et. al. 2009

K.SLS<sub>167</sub>NS<sub>167</sub>TLR.H/2

0.6571

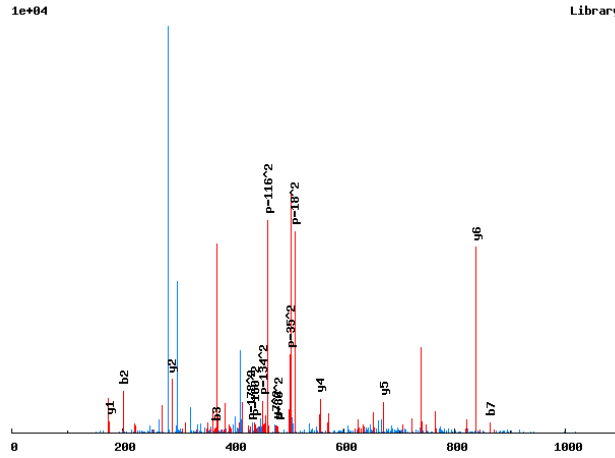

| Library | b <sup>1+</sup> | b <sup>2+</sup> | # | AA     | # | y <sup>1+</sup> | y <sup>2+</sup> |
|---------|-----------------|-----------------|---|--------|---|-----------------|-----------------|
|         | 88.0393         | 44.5233         | 1 | S      | 8 |                 |                 |
|         | 201.1234        | 101.0653        | 2 | L      | 7 | 950.3744        | 475.6908        |
|         | 368.1217        | 184.5645        | 3 | S[167] | 6 | 837.2903        | 419.1488        |
|         | 482.1647        | 241.5860        | 4 | N      | 5 | 670.2920        | 335.6496        |
|         | 649.1630        | 325.0852        | 5 | S[167] | 4 | 556.2491        | 278.6282        |
|         | 750.2107        | 375.6090        | 6 | T      | 3 | 389.2507        | 195.1290        |
|         | 863.2948        | 432.1510        | 7 | L      | 2 | 288.2030        | 144.6051        |
|         |                 |                 | 8 | R      | 1 | 175.1190        | 88.0631         |

# Annotated spectra from Saleem et. al. 2009

K.SLS<sub>167</sub>PTS<sub>167</sub>EKIPIAGQE<sub>167</sub>E<sub>167</sub>E<sub>167</sub>K/3

0.9733

1e+04

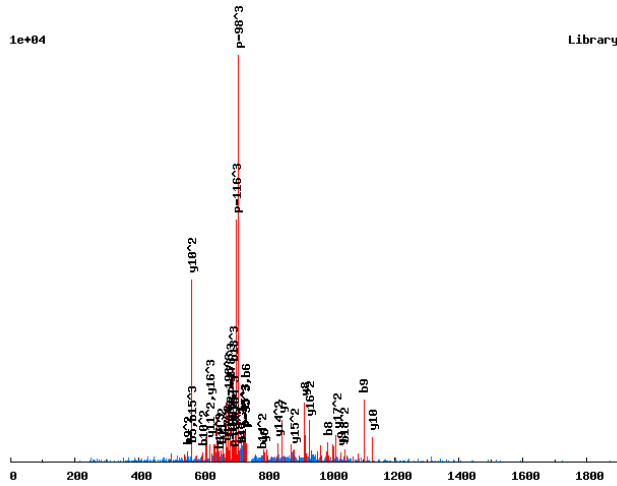

| Library | b <sup>1+</sup> | b <sup>2+</sup> | b <sup>3+</sup> | #  | AA     | #  | y <sup>1+</sup> | y <sup>2+</sup> | y <sup>3+</sup> |
|---------|-----------------|-----------------|-----------------|----|--------|----|-----------------|-----------------|-----------------|
|         | 88.0393         | 44.5233         | 30.0180         | 1  | S      | 19 |                 |                 |                 |
|         | 201.1234        | 101.0653        | 67.7126         | 2  | L      | 18 | 2143.9560       | 1072.4816       | 715.3235        |
|         | 368.1217        | 184.5645        | 123.3788        | 3  | S[167] | 17 | 2030.8719       | 1015.9396       | 677.6288        |
|         | 465.1745        | 233.0909        | 155.7297        | 4  | P      | 16 | 1863.8735       | 932.4404        | 621.9627        |
|         | 566.2222        | 283.6147        | 189.4122        | 5  | T      | 15 | 1766.8208       | 883.9140        | 589.6118        |
|         | 733.2205        | 367.1139        | 245.0784        | 6  | S[167] | 14 | 1665.7731       | 833.3902        | 555.9292        |
|         | 862.2631        | 431.6352        | 288.0926        | 7  | E      | 13 | 1498.7747       | 749.8910        | 500.2631        |
|         | 990.3581        | 495.6827        | 330.7909        | 8  | K      | 12 | 1369.7321       | 685.3697        | 457.2489        |
|         | 1103.4421       | 552.2247        | 368.4856        | 9  | I      | 11 | 1241.6372       | 621.3222        | 414.5506        |
|         | 1200.4949       | 600.7511        | 400.8365        | 10 | P      | 10 | 1128.5531       | 564.7802        | 376.8559        |
|         | 1313.5790       | 657.2931        | 438.5312        | 11 | I      | 9  | 1031.5004       | 516.2538        | 344.5050        |
|         | 1384.6161       | 692.8117        | 462.2102        | 12 | A      | 8  | 918.4163        | 459.7118        | 306.8103        |
|         | 1441.6375       | 721.3224        | 481.2174        | 13 | G      | 7  | 847.3792        | 424.1932        | 283.1313        |
|         | 1569.6961       | 785.3517        | 523.9036        | 14 | Q      | 6  | 790.3577        | 395.6825        | 264.1241        |
|         | 1698.7387       | 849.8730        | 566.9178        | 15 | E      | 5  | 662.2992        | 331.6532        | 221.4379        |
|         | 1826.7973       | 913.9023        | 609.6039        | 16 | Q      | 4  | 533.2566        | 267.1319        | 178.4237        |
|         | 1955.8399       | 978.4236        | 652.6181        | 17 | E      | 3  | 405.1980        | 203.1026        | 135.7375        |
|         | 2084.8825       | 1042.9449       | 695.6323        | 18 | E      | 2  | 276.1554        | 138.5813        | 92.7233         |
|         |                 |                 |                 | 19 | K      | 1  | 147.1128        | 74.0600         | 49.7091         |



# Annotated spectra from Saleem et. al. 2009

K.SLSSAQSSSSGPSS<sub>167</sub>S<sub>167</sub>SEEDSDRDIESLDKK.I/3

0.927

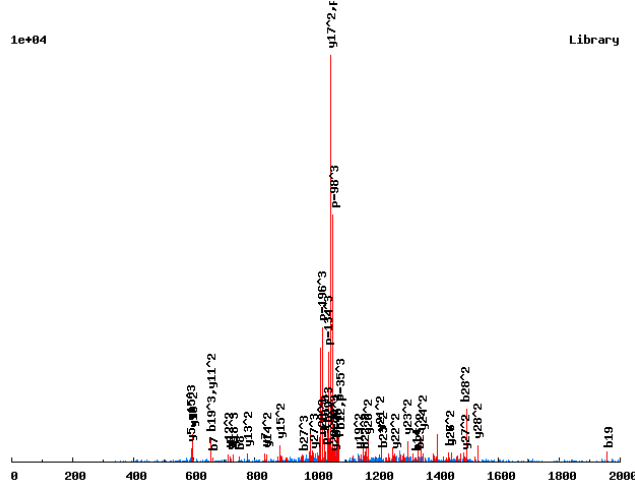

| Library | b <sup>1+</sup> | b <sup>2+</sup> | b <sup>3+</sup> | #  | AA     | #  | y <sup>1+</sup> | y <sup>2+</sup> | y <sup>3+</sup> |
|---------|-----------------|-----------------|-----------------|----|--------|----|-----------------|-----------------|-----------------|
|         | 88.0393         | 44.5233         | 30.0180         | 1  | S      | 30 |                 |                 |                 |
|         | 201.1234        | 101.0653        | 67.7126         | 2  | L      | 29 | 3175.2835       | 1588.1454       | 1059.0994       |
|         | 288.1554        | 144.5813        | 96.7233         | 3  | S      | 28 | 3062.1995       | 1531.6034       | 1021.4047       |
|         | 375.1874        | 188.0974        | 125.7340        | 4  | S      | 27 | 2975.1674       | 1488.0874       | 992.3940        |
|         | 446.2245        | 223.6159        | 149.4130        | 5  | A      | 26 | 2888.1354       | 1444.5713       | 963.3833        |
|         | 574.2831        | 287.6452        | 192.0992        | 6  | Q      | 25 | 2817.0983       | 1409.0528       | 939.7043        |
|         | 661.3152        | 331.1612        | 221.1099        | 7  | S      | 24 | 2689.0397       | 1345.0235       | 897.0181        |
|         | 748.3472        | 374.6772        | 250.1206        | 8  | S      | 23 | 2602.0077       | 1301.5075       | 868.0074        |
|         | 835.3792        | 418.1932        | 279.1313        | 9  | S      | 22 | 2514.9756       | 1257.9915       | 838.9967        |
|         | 922.4112        | 461.7093        | 308.1419        | 10 | S      | 21 | 2427.9436       | 1214.4754       | 809.9861        |
|         | 979.4327        | 490.2200        | 327.1491        | 11 | G      | 20 | 2340.9116       | 1170.9594       | 780.9754        |
|         | 1076.4855       | 538.7464        | 359.5000        | 12 | P      | 19 | 2283.8901       | 1142.4487       | 761.9682        |
|         | 1163.5175       | 582.2624        | 388.5107        | 13 | S      | 18 | 2186.8374       | 1093.9223       | 729.6173        |
|         | 1330.5159       | 665.7616        | 444.1768        | 14 | S[167] | 17 | 2099.8053       | 1050.4063       | 700.6066        |
|         | 1497.5142       | 749.2607        | 499.8429        | 15 | S[167] | 16 | 1932.8070       | 966.9071        | 644.9405        |
|         | 1584.5462       | 792.7768        | 528.8536        | 16 | S      | 15 | 1765.8086       | 883.4079        | 589.2744        |
|         | 1713.5888       | 857.2981        | 571.8678        | 17 | E      | 14 | 1678.7766       | 839.8919        | 560.2637        |
|         | 1842.6314       | 921.8194        | 614.8820        | 18 | E      | 13 | 1549.7340       | 775.3706        | 517.2495        |
|         | 1957.6584       | 979.3328        | 653.2243        | 19 | D      | 12 | 1420.6914       | 710.8493        | 474.2353        |
|         | 2072.6853       | 1036.8463       | 691.5666        | 20 | D      | 11 | 1305.6645       | 653.3359        | 435.8930        |
|         | 2159.7173       | 1080.3623       | 720.5773        | 21 | S      | 10 | 1190.6375       | 595.8224        | 397.5507        |
|         | 2315.8184       | 1158.4129       | 772.6110        | 22 | R      | 9  | 1103.6055       | 552.3064        | 368.5400        |
|         | 2430.8454       | 1215.9263       | 810.9533        | 23 | D      | 8  | 947.5044        | 474.2558        | 316.5063        |
|         | 2543.9294       | 1272.4684       | 848.6480        | 24 | I      | 7  | 832.4774        | 416.7424        | 278.1640        |
|         | 2672.9720       | 1336.9897       | 891.6622        | 25 | E      | 6  | 719.3934        | 360.2003        | 240.4693        |
|         | 2760.0041       | 1380.5057       | 920.6729        | 26 | S      | 5  | 590.3508        | 295.6790        | 197.4551        |
|         | 2873.0881       | 1437.0477       | 958.3676        | 27 | L      | 4  | 503.3188        | 252.1630        | 168.4444        |
|         | 2988.1151       | 1494.5612       | 996.7099        | 28 | D      | 3  | 390.2347        | 195.6210        | 130.7498        |
|         | 3116.2100       | 1558.6087       | 1039.4082       | 29 | K      | 2  | 275.2078        | 138.1075        | 92.4074         |
|         |                 |                 |                 | 30 | K      | 1  | 147.1128        | 74.0600         | 49.7091         |

# Annotated spectra from Saleem et. al. 2009

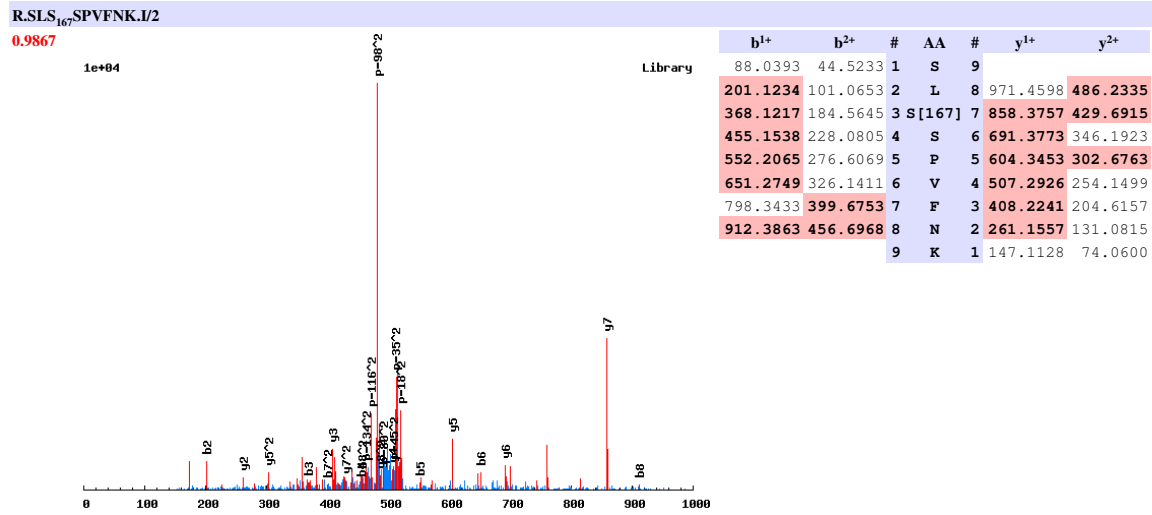

# Annotated spectra from Saleem et. al. 2009

R.SLST<sub>181</sub>IPSY<sub>243</sub>EQMK<sub>136</sub>R/2

0.6824

1e+04

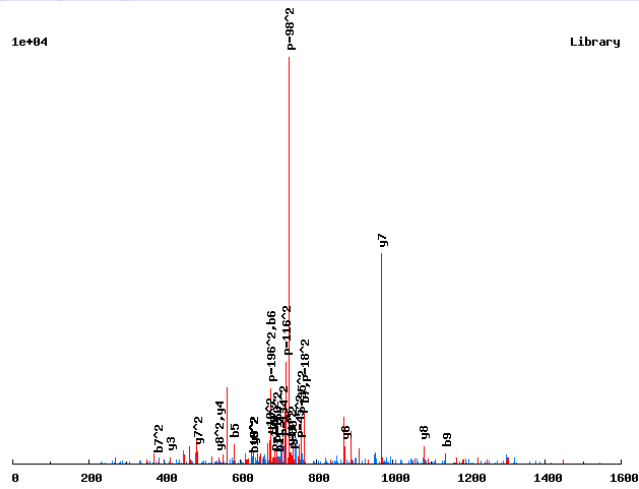

| Library | b <sup>1+</sup> | b <sup>2+</sup> | #  | AA      | #  | y <sup>1+</sup> | y <sup>2+</sup> |
|---------|-----------------|-----------------|----|---------|----|-----------------|-----------------|
|         | 88.0393         | 44.5233         | 1  | S       | 12 |                 |                 |
|         | 201.1234        | 101.0653        | 2  | L       | 11 | 1464.5973       | 732.8023        |
|         | 288.1554        | 144.5813        | 3  | S       | 10 | 1351.5132       | 676.2602        |
|         | 469.1694        | 235.0883        | 4  | T [181] | 9  | 1264.4812       | 632.7442        |
|         | 582.2535        | 291.6304        | 5  | I       | 8  | 1083.4672       | 542.2372        |
|         | 679.3062        | 340.1568        | 6  | P       | 7  | 970.3831        | 485.6952        |
|         | 766.3383        | 383.6728        | 7  | S       | 6  | 873.3304        | 437.1688        |
|         | 1009.3679       | 505.1876        | 8  | Y [243] | 5  | 786.2983        | 393.6528        |
|         | 1138.4105       | 569.7089        | 9  | E       | 4  | 543.2687        | 272.1380        |
|         | 1266.4691       | 633.7382        | 10 | Q       | 3  | 414.2261        | 207.6167        |
|         | 1397.5096       | 699.2584        | 11 | M       | 2  | 286.1675        | 143.5874        |
|         |                 |                 | 12 | K [136] | 1  | 155.1270        | 78.0671         |

# Annotated spectra from Saleem et. al. 2009

R.S<sub>167</sub>MENVTPK<sub>136</sub>I/2

0.7824

1e+04

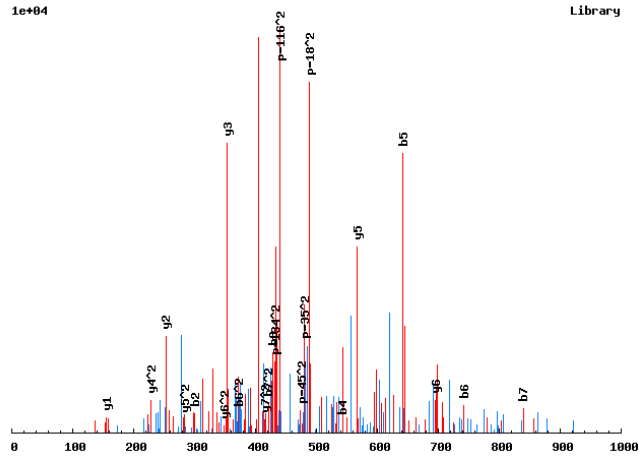

| Library | b <sup>1+</sup> | b <sup>2+</sup> | # | AA | #     | y <sup>1+</sup> | y <sup>2+</sup> |         |
|---------|-----------------|-----------------|---|----|-------|-----------------|-----------------|---------|
|         | 168.0056        | 84.5065         | 1 | S  | [167] | 8               |                 |         |
|         | 299.0461        | 150.0267        | 2 | M  | 7     | 826.4219        | 413.7146        |         |
|         | 428.0887        | 214.5480        | 3 | E  | 6     | 695.3814        | 348.1943        |         |
|         | 542.1317        | 271.5695        | 4 | N  | 5     | 566.3388        | 283.6730        |         |
|         | 641.2001        | 321.1037        | 5 | V  | 4     | 452.2958        | 226.6516        |         |
|         | 742.2477        | 371.6275        | 6 | T  | 3     | 353.2274        | 177.1174        |         |
|         | 839.3005        | 420.1539        | 7 | P  | 2     | 252.1798        | 126.5935        |         |
|         |                 |                 | 8 | K  | [136] | 1               | 155.1270        | 78.0671 |

# Annotated spectra from Saleem et. al. 2009

R.S<sub>167</sub>M<sub>147</sub>GLLDEYIDPTK<sub>136</sub>K/2

0.9999

1e+04

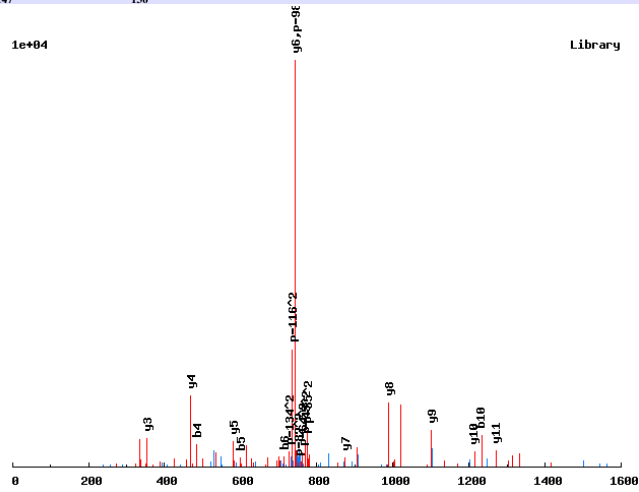

| Library | b <sup>1+</sup> | b <sup>2+</sup> | #  | AA | #   | y <sup>1+</sup> | y <sup>2+</sup> |         |
|---------|-----------------|-----------------|----|----|-----|-----------------|-----------------|---------|
|         | 168.0056        | 84.5065         | 1  | S  | 13  |                 |                 |         |
|         | 315.0410        | 158.0242        | 2  | M  | 12  | 1418.6963       | 709.8518        |         |
|         | 372.0625        | 186.5349        | 3  | G  | 11  | 1271.6609       | 636.3341        |         |
|         | 485.1466        | 243.0769        | 4  | L  | 10  | 1214.6394       | 607.8233        |         |
|         | 598.2306        | 299.6190        | 5  | L  | 9   | 1101.5554       | 551.2813        |         |
|         | 713.2576        | 357.1324        | 6  | D  | 8   | 988.4713        | 494.7393        |         |
|         | 842.3002        | 421.6537        | 7  | E  | 7   | 873.4444        | 437.2258        |         |
|         | 1005.3635       | 503.1854        | 8  | Y  | 6   | 744.4018        | 372.7045        |         |
|         | 1118.4475       | 559.7274        | 9  | I  | 5   | 581.3384        | 291.1729        |         |
|         | 1233.4745       | 617.2409        | 10 | D  | 4   | 468.2544        | 234.6308        |         |
|         | 1330.5272       | 665.7673        | 11 | P  | 3   | 353.2274        | 177.1174        |         |
|         | 1431.5749       | 716.2911        | 12 | T  | 2   | 256.1747        | 128.5910        |         |
|         |                 |                 | 13 | K  | 136 | 1               | 155.1270        | 78.0671 |

# Annotated spectra from Saleem et. al. 2009

R.S<sub>167</sub>MLEIAESPSLK.Q/2

1

1e+04

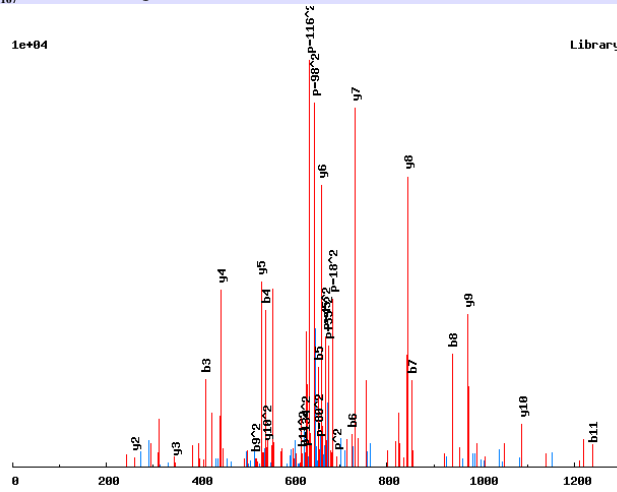

| Library | b <sup>1+</sup> | b <sup>2+</sup> | #  | AA | #     | y <sup>1+</sup> | y <sup>2+</sup> |
|---------|-----------------|-----------------|----|----|-------|-----------------|-----------------|
|         | 168.0056        | 84.5065         | 1  | S  | [167] | 12              |                 |
|         | 299.0461        | 150.0267        | 2  | M  | 11    | 1217.6446       | 609.3259        |
|         | 412.1302        | 206.5687        | 3  | L  | 10    | 1086.6041       | 543.8057        |
|         | 541.1728        | 271.0900        | 4  | E  | 9     | 973.5200        | 487.2637        |
|         | 654.2568        | 327.6321        | 5  | I  | 8     | 844.4774        | 422.7424        |
|         | 725.2940        | 363.1506        | 6  | A  | 7     | 731.3934        | 366.2003        |
|         | 854.3365        | 427.6719        | 7  | E  | 6     | 660.3563        | 330.6818        |
|         | 941.3686        | 471.1879        | 8  | S  | 5     | 531.3137        | 266.1605        |
|         | 1038.4213       | 519.7143        | 9  | P  | 4     | 444.2817        | 222.6445        |
|         | 1125.4534       | 563.2303        | 10 | S  | 3     | 347.2289        | 174.1181        |
|         | 1238.5374       | 619.7724        | 11 | L  | 2     | 260.1969        | 130.6021        |
|         |                 |                 | 12 | K  | 1     | 147.1128        | 74.0600         |

Annotated spectra from Saleem et. al. 2009

K.SMLNS<sub>167</sub>T<sub>181</sub>PTTPHNGPTPLPAK.A/3

0.7211

1e+04

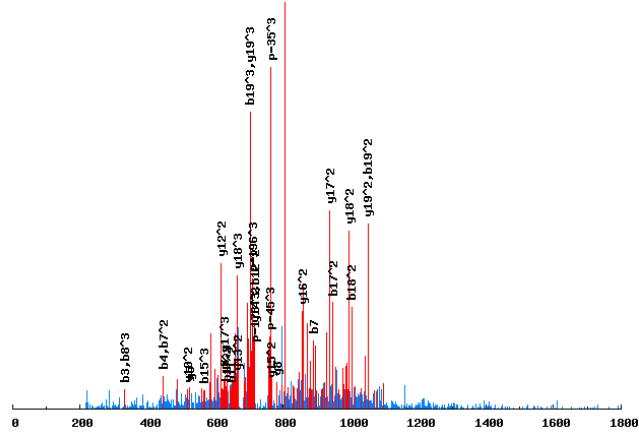

| Library | b <sup>1+</sup> | b <sup>2+</sup>  | b <sup>3+</sup> | #  | AA     | #  | y <sup>1+</sup> | y <sup>2+</sup>  | y <sup>3+</sup> |
|---------|-----------------|------------------|-----------------|----|--------|----|-----------------|------------------|-----------------|
|         | 88.0393         | 44.5233          | 30.0180         | 1  | S      | 21 |                 |                  |                 |
|         | 219.0798        | 110.0435         | 73.6981         | 2  | M      | 20 | 2234.9916       | 1117.9995        | 745.6687        |
|         | <b>332.1639</b> | 166.5856         | 111.3928        | 3  | L      | 19 | 2103.9512       | <b>1052.4792</b> | <b>701.9886</b> |
|         | <b>446.2068</b> | 223.6070         | 149.4071        | 4  | N      | 18 | 1990.8671       | <b>995.9372</b>  | <b>664.2939</b> |
|         | 613.2052        | 307.1062         | 205.0732        | 5  | S[167] | 17 | 1876.8242       | <b>938.9157</b>  | <b>626.2796</b> |
|         | 794.2192        | 397.6132         | 265.4112        | 6  | T[181] | 16 | 1709.8258       | <b>855.4165</b>  | 570.6135        |
|         | <b>891.2719</b> | <b>446.1396</b>  | 297.7622        | 7  | P      | 15 | 1528.8118       | <b>764.9095</b>  | 510.2754        |
|         | 992.3196        | 496.6634         | <b>331.4447</b> | 8  | T      | 14 | 1431.7590       | <b>716.3832</b>  | 477.9245        |
|         | 1093.3673       | 547.1873         | 365.1273        | 9  | T      | 13 | 1330.7114       | <b>665.8593</b>  | 444.2420        |
|         | 1190.4200       | 595.7137         | 397.4782        | 10 | P      | 12 | 1229.6637       | <b>615.3355</b>  | 410.5594        |
|         | 1291.4677       | <b>646.2375</b>  | 431.1608        | 11 | T      | 11 | 1132.6109       | 566.8091         | 378.2085        |
|         | 1428.5266       | <b>714.7670</b>  | 476.8471        | 12 | H      | 10 | 1031.5632       | <b>516.2853</b>  | 344.5259        |
|         | 1542.5696       | 771.7884         | 514.8614        | 13 | N      | 9  | 894.5043        | 447.7558         | 298.8396        |
|         | 1599.5910       | 800.2992         | 533.8685        | 14 | G      | 8  | <b>780.4614</b> | 390.7343         | 260.8253        |
|         | 1696.6438       | 848.8255         | <b>566.2194</b> | 15 | P      | 7  | 723.4399        | 362.2236         | 241.8182        |
|         | 1797.6915       | 899.3494         | 599.9020        | 16 | T      | 6  | <b>626.3872</b> | 313.6972         | 209.4672        |
|         | 1894.7442       | <b>947.8758</b>  | <b>632.2529</b> | 17 | P      | 5  | <b>525.3395</b> | 263.1734         | 175.7847        |
|         | 2007.8283       | <b>1004.4178</b> | 669.9476        | 18 | L      | 4  | 428.2867        | 214.6470         | 143.4338        |
|         | 2104.8810       | <b>1052.9442</b> | <b>702.2985</b> | 19 | P      | 3  | 315.2027        | 158.1050         | 105.7391        |
|         | 2175.9182       | 1088.4627        | 725.9776        | 20 | A      | 2  | 218.1499        | 109.5786         | 73.3882         |
|         |                 |                  |                 | 21 | K      | 1  | 147.1128        | 74.0600          | 49.7091         |

# Annotated spectra from Saleem et. al. 2009

K.S<sub>167</sub>MSHIYSTNSASR.Q/2

0.9448

1e+04

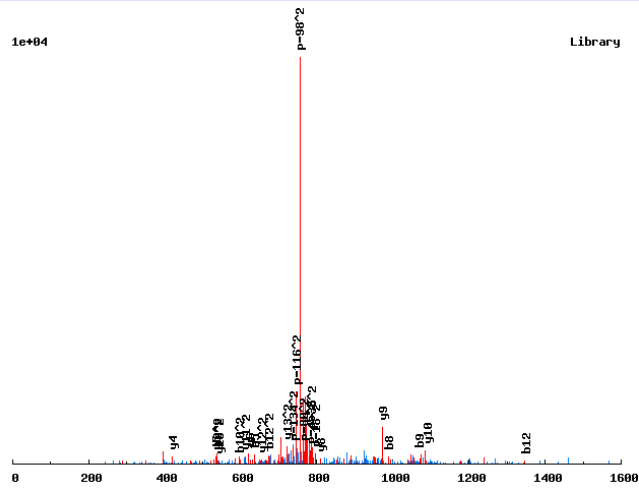

| Library | b <sup>1+</sup> | b <sup>2+</sup> | #  | AA | #     | y <sup>1+</sup> | y <sup>2+</sup> |
|---------|-----------------|-----------------|----|----|-------|-----------------|-----------------|
|         | 168.0056        | 84.5065         | 1  | S  | [167] | 14              |                 |
|         | 299.0461        | 150.0267        | 2  | M  | 13    | 1440.6536       | 720.8304        |
|         | 386.0782        | 193.5427        | 3  | S  | 12    | 1309.6131       | 655.3102        |
|         | 523.1371        | 262.0722        | 4  | H  | 11    | 1222.5811       | 611.7942        |
|         | 636.2211        | 318.6142        | 5  | I  | 10    | 1085.5222       | 543.2647        |
|         | 799.2845        | 400.1459        | 6  | Y  | 9     | 972.4381        | 486.7227        |
|         | 886.3165        | 443.6619        | 7  | S  | 8     | 809.3748        | 405.1910        |
|         | 987.3642        | 494.1857        | 8  | T  | 7     | 722.3428        | 361.6750        |
|         | 1074.3962       | 537.7017        | 9  | S  | 6     | 621.2951        | 311.1512        |
|         | 1188.4391       | 594.7232        | 10 | N  | 5     | 534.2631        | 267.6352        |
|         | 1275.4712       | 638.2392        | 11 | S  | 4     | 420.2201        | 210.6137        |
|         | 1346.5083       | 673.7578        | 12 | A  | 3     | 333.1881        | 167.0977        |
|         | 1433.5403       | 717.2738        | 13 | S  | 2     | 262.1510        | 131.5791        |
|         |                 |                 | 14 | R  | 1     | 175.1190        | 88.0631         |



# Annotated spectra from Saleem et. al. 2009

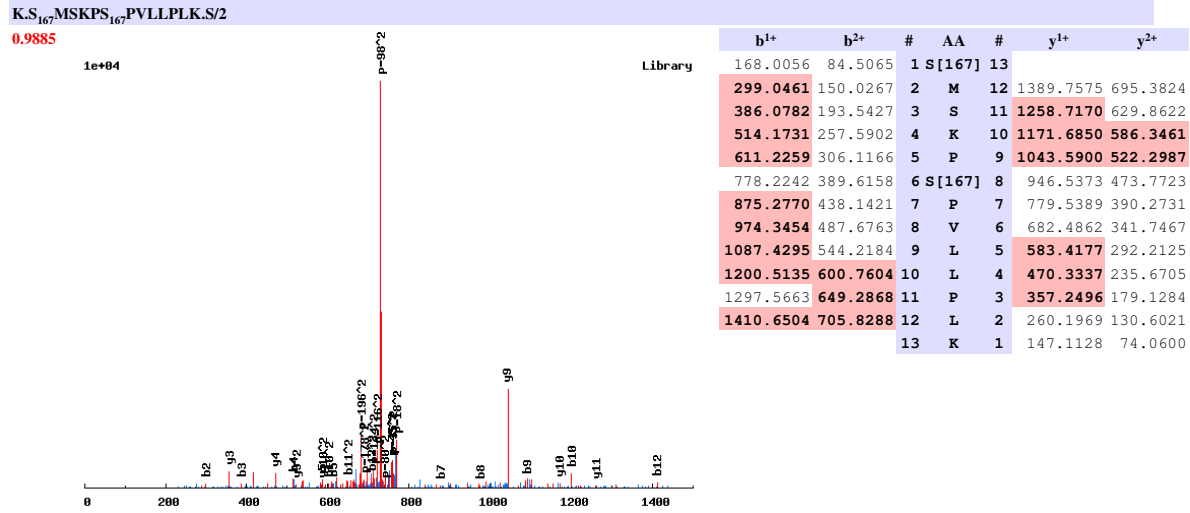

# Annotated spectra from Saleem et. al. 2009

R.S<sub>167</sub>MSPSNIASGEDRIT<sub>181</sub>R.T/2

0.947

1e+04

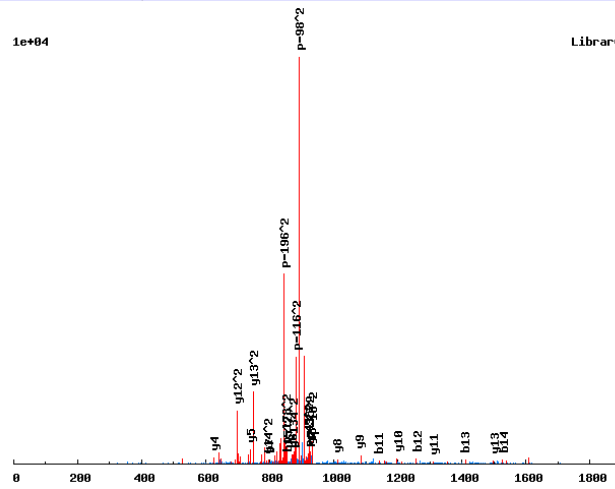

| Library | b <sup>1+</sup> | b <sup>2+</sup> | #  | AA      | #  | y <sup>1+</sup> | y <sup>2+</sup> |
|---------|-----------------|-----------------|----|---------|----|-----------------|-----------------|
|         | 168.0056        | 84.5065         | 1  | S [167] | 16 |                 |                 |
|         | 299.0461        | 150.0267        | 2  | M       | 15 | 1713.7626       | 857.3849        |
|         | 386.0782        | 193.5427        | 3  | S       | 14 | 1582.7221       | 791.8647        |
|         | 483.1309        | 242.0691        | 4  | P       | 13 | 1495.6900       | 748.3487        |
|         | 570.1630        | 285.5851        | 5  | S       | 12 | 1398.6373       | 699.8223        |
|         | 684.2059        | 342.6066        | 6  | N       | 11 | 1311.6053       | 656.3063        |
|         | 797.2899        | 399.1486        | 7  | I       | 10 | 1197.5623       | 599.2848        |
|         | 868.3271        | 434.6672        | 8  | A       | 9  | 1084.4783       | 542.7428        |
|         | 955.3591        | 478.1832        | 9  | S       | 8  | 1013.4412       | 507.2242        |
|         | 1012.3805       | 506.6939        | 10 | G       | 7  | 926.4091        | 463.7082        |
|         | 1141.4231       | 571.2152        | 11 | E       | 6  | 869.3877        | 435.1975        |
|         | 1256.4501       | 628.7287        | 12 | D       | 5  | 740.3451        | 370.6762        |
|         | 1412.5512       | 706.7792        | 13 | R       | 4  | 625.3181        | 313.1627        |
|         | 1525.6352       | 763.3213        | 14 | I       | 3  | 469.2170        | 235.1122        |
|         | 1706.6493       | 853.8283        | 15 | T [181] | 2  | 356.1330        | 178.5701        |
|         |                 |                 | 16 | R       | 1  | 175.1190        | 88.0631         |

# Annotated spectra from Saleem et. al. 2009

K.SMS<sub>167</sub>-SENTVPR<sub>166</sub>S/2

0.9225

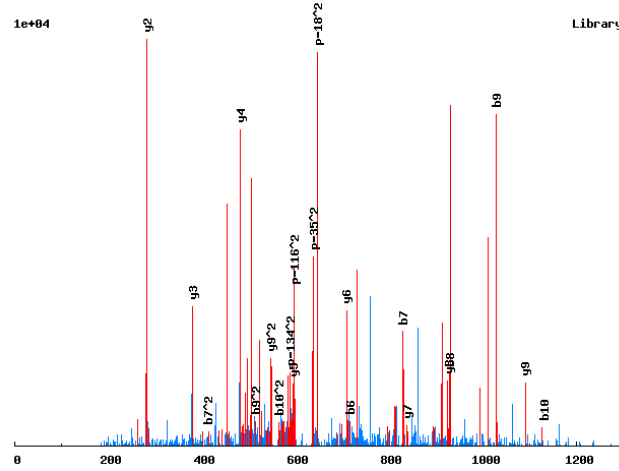

| Library | b <sup>1+</sup> | b <sup>2+</sup> | #  | AA     | #  | y <sup>1+</sup> | y <sup>2+</sup> |
|---------|-----------------|-----------------|----|--------|----|-----------------|-----------------|
|         | 88.0393         | 44.5233         | 1  | S      | 11 |                 |                 |
|         | 219.0798        | 110.0435        | 2  | M      | 10 | 1223.5365       | 612.2719        |
|         | 386.0782        | 193.5427        | 3  | S[167] | 9  | 1092.4960       | 546.7517        |
|         | 473.1102        | 237.0587        | 4  | S      | 8  | 925.4977        | 463.2525        |
|         | 602.1528        | 301.5800        | 5  | E      | 7  | 838.4656        | 419.7365        |
|         | 716.1957        | 358.6015        | 6  | N      | 6  | 709.4231        | 355.2152        |
|         | 829.2798        | 415.1435        | 7  | I      | 5  | 595.3801        | 298.1937        |
|         | 930.3275        | 465.6674        | 8  | T      | 4  | 482.2961        | 241.6517        |
|         | 1029.3959       | 515.2016        | 9  | V      | 3  | 381.2484        | 191.1278        |
|         | 1126.4486       | 563.7280        | 10 | P      | 2  | 282.1800        | 141.5936        |
|         |                 |                 | 11 | R[166] | 1  | 185.1272        | 93.0672         |

# Annotated spectra from Saleem et. al. 2009

K.SM<sub>147</sub>S<sub>167</sub>VAS<sub>167</sub>LDQLGK.N/2

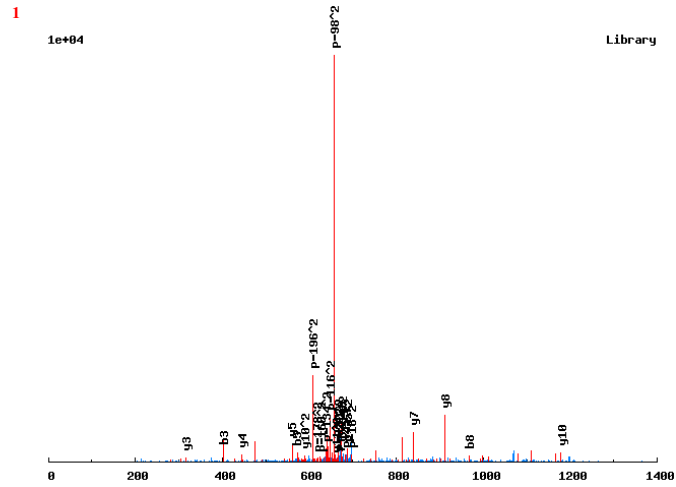

| Library | b <sup>1+</sup> | b <sup>2+</sup> | #  | AA     | #  | y <sup>1+</sup> | y <sup>2+</sup> |
|---------|-----------------|-----------------|----|--------|----|-----------------|-----------------|
|         | 88.0393         | 44.5233         | 1  | S      | 12 |                 |                 |
|         | 235.0747        | 118.0410        | 2  | M[147] | 11 | 1324.5255       | 662.7664        |
|         | 402.0731        | 201.5402        | 3  | S[167] | 10 | 1177.4901       | 589.2487        |
|         | 501.1415        | 251.0744        | 4  | V      | 9  | 1010.4918       | 505.7495        |
|         | 572.1786        | 286.5929        | 5  | A      | 8  | 911.4234        | 456.2153        |
|         | 739.1770        | 370.0921        | 6  | S[167] | 7  | 840.3863        | 420.6968        |
|         | 852.2610        | 426.6341        | 7  | L      | 6  | 673.3879        | 337.1976        |
|         | 967.2880        | 484.1476        | 8  | D      | 5  | 560.3038        | 280.6556        |
|         | 1095.3465       | 548.1769        | 9  | Q      | 4  | 445.2769        | 223.1421        |
|         | 1208.4306       | 604.7189        | 10 | L      | 3  | 317.2183        | 159.1128        |
|         | 1265.4521       | 633.2297        | 11 | G      | 2  | 204.1343        | 102.5708        |
|         |                 |                 | 12 | K      | 1  | 147.1128        | 74.0600         |

Annotated spectra from Saleem et. al. 2009

K.SNEFGDSS<sub>167</sub>ES<sub>167</sub>SVRESS<sub>167</sub>IPVEGELEQLQK.L/3

0.8427

1e+04

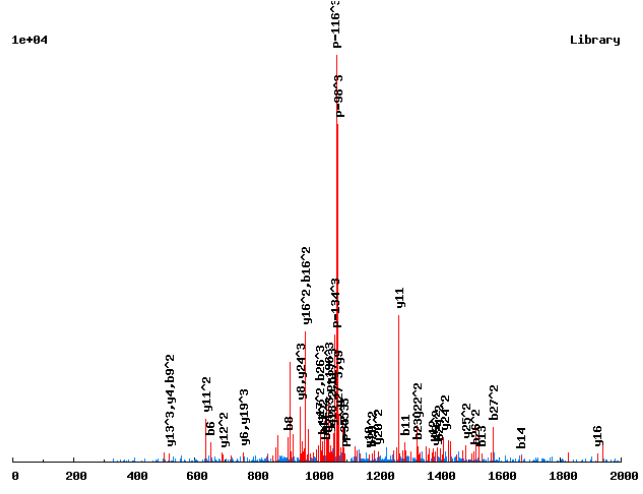

| Library | b <sup>1+</sup> | b <sup>2+</sup> | b <sup>3+</sup> | #  | AA     | #  | y <sup>1+</sup> | y <sup>2+</sup> | y <sup>3+</sup> |
|---------|-----------------|-----------------|-----------------|----|--------|----|-----------------|-----------------|-----------------|
|         | 88.0393         | 44.5233         | 30.0180         | 1  | S      | 28 |                 |                 |                 |
|         | 202.0822        | 101.5448        | 68.0323         | 2  | N      | 27 | 3220.3007       | 1610.6540       | 1074.1051       |
|         | 331.1248        | 166.0661        | 111.0465        | 3  | E      | 26 | 3106.2578       | 1553.6325       | 1036.0908       |
|         | 478.1932        | 239.6003        | 160.0693        | 4  | F      | 25 | 2977.2152       | 1489.1113       | 993.0766        |
|         | 535.2147        | 268.1110        | 179.0764        | 5  | G      | 24 | 2830.1468       | 1415.5770       | 944.0538        |
|         | 650.2416        | 325.6245        | 217.4187        | 6  | D      | 23 | 2773.1254       | 1387.0663       | 925.0466        |
|         | 737.2737        | 369.1405        | 246.4294        | 7  | S      | 22 | 2658.0984       | 1329.5528       | 886.7043        |
|         | 904.2720        | 452.6397        | 302.0955        | 8  | S[167] | 21 | 2571.0664       | 1286.0368       | 857.6936        |
|         | 1033.3146       | 517.1610        | 345.1097        | 9  | E      | 20 | 2404.0680       | 1202.5377       | 802.0275        |
|         | 1200.3130       | 600.6601        | 400.7758        | 10 | S[167] | 19 | 2275.0254       | 1138.0164       | 759.0133        |
|         | 1287.3450       | 644.1761        | 429.7865        | 11 | S      | 18 | 2108.0271       | 1054.5172       | 703.3472        |
|         | 1386.4134       | 693.7104        | 462.8093        | 12 | V      | 17 | 2020.9950       | 1011.0012       | 674.3365        |
|         | 1542.5145       | 771.7609        | 514.8430        | 13 | R      | 16 | 1921.9266       | 961.4670        | 641.3137        |
|         | 1671.5571       | 836.2822        | 557.8572        | 14 | E      | 15 | 1765.8255       | 883.4164        | 589.2800        |
|         | 1758.5892       | 879.7982        | 586.8679        | 15 | S      | 14 | 1636.7829       | 818.8951        | 546.2658        |
|         | 1925.5875       | 963.2974        | 642.5340        | 16 | S[167] | 13 | 1549.7509       | 775.3791        | 517.2552        |
|         | 2038.6716       | 1019.8394       | 680.2287        | 17 | I      | 12 | 1382.7525       | 691.8799        | 461.5890        |
|         | 2135.7243       | 1068.3658       | 712.5796        | 18 | P      | 11 | 1269.6685       | 635.3379        | 423.8943        |
|         | 2234.7927       | 1117.9000       | 745.6024        | 19 | V      | 10 | 1172.6157       | 586.8115        | 391.5434        |
|         | 2363.8353       | 1182.4213       | 788.6166        | 20 | E      | 9  | 1073.5473       | 537.2773        | 358.5206        |
|         | 2420.8568       | 1210.9320       | 807.6238        | 21 | G      | 8  | 944.5047        | 472.7560        | 315.5064        |
|         | 2549.8994       | 1275.4533       | 850.6380        | 22 | E      | 7  | 887.4833        | 444.2453        | 296.4993        |
|         | 2662.9834       | 1331.9954       | 888.3327        | 23 | L      | 6  | 758.4407        | 379.7240        | 253.4851        |
|         | 2792.0260       | 1396.5167       | 931.3469        | 24 | E      | 5  | 645.3566        | 323.1819        | 215.7904        |
|         | 2920.0846       | 1460.5459       | 974.0331        | 25 | Q      | 4  | 516.3140        | 258.6607        | 172.7762        |
|         | 3033.1687       | 1517.0880       | 1011.7277       | 26 | L      | 3  | 388.2554        | 194.6314        | 130.0900        |
|         | 3161.2273       | 1581.1173       | 1054.4139       | 27 | Q      | 2  | 275.1714        | 138.0893        | 92.3953         |
|         |                 |                 |                 | 28 | K      | 1  | 147.1128        | 74.0600         | 49.7091         |

# Annotated spectra from Saleem et. al. 2009

R.SNES<sub>167</sub>HLGFK<sub>136</sub>K/2

0.7702

1e+04

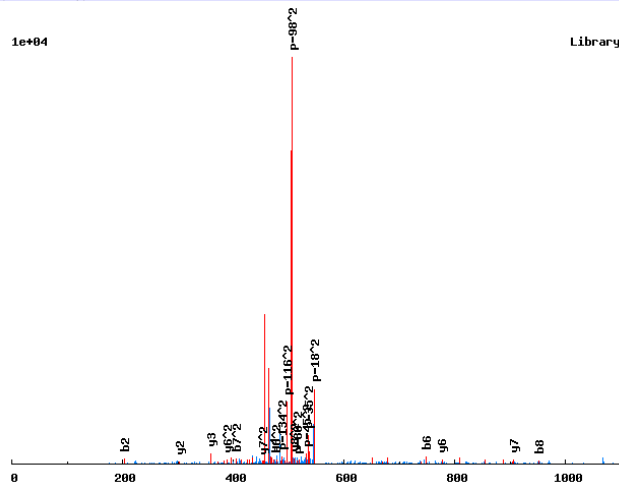

| Library | b <sup>1+</sup> | b <sup>2+</sup> | # | AA     | # | y <sup>1+</sup> | y <sup>2+</sup> |
|---------|-----------------|-----------------|---|--------|---|-----------------|-----------------|
|         | 88.0393         | 44.5233         | 1 | S      | 9 |                 |                 |
|         | <b>202.0822</b> | 101.5448        | 2 | N      | 8 | 1019.4437       | <b>510.2255</b> |
|         | 331.1248        | 166.0661        | 3 | E      | 7 | <b>905.4008</b> | <b>453.2040</b> |
|         | 498.1232        | 249.5652        | 4 | S[167] | 6 | <b>776.3582</b> | <b>388.6827</b> |
|         | 635.1821        | 318.0947        | 5 | H      | 5 | 609.3598        | 305.1836        |
|         | <b>748.2662</b> | 374.6367        | 6 | L      | 4 | <b>472.3009</b> | 236.6541        |
|         | 805.2876        | <b>403.1475</b> | 7 | G      | 3 | <b>359.2169</b> | 180.1121        |
|         | <b>952.3560</b> | <b>476.6817</b> | 8 | F      | 2 | <b>302.1954</b> | 151.6013        |
|         |                 |                 |   | K[136] | 1 | 155.1270        | 78.0671         |

# Annotated spectra from Saleem et. al. 2009

K.SNIST<sub>181</sub>KS<sub>167</sub>LEPSSSVR.Q/2

0.9808

1e+04

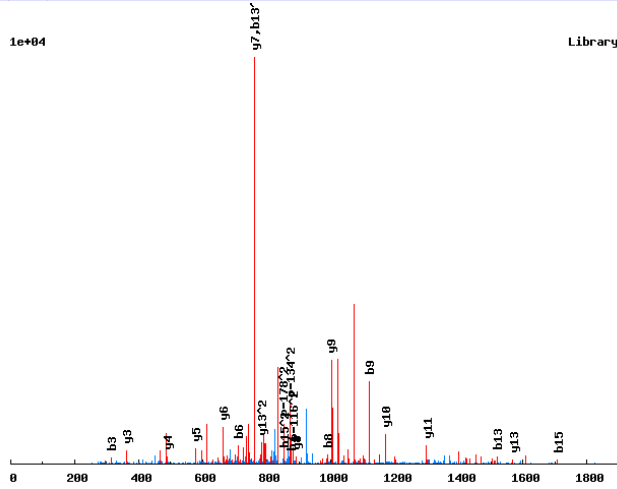

| Library | b <sup>1+</sup> | b <sup>2+</sup> | #  | AA     | #  | y <sup>1+</sup> | y <sup>2+</sup> |
|---------|-----------------|-----------------|----|--------|----|-----------------|-----------------|
|         | 88.0393         | 44.5233         | 1  | S      | 16 |                 |                 |
|         | 202.0822        | 101.5448        | 2  | N      | 15 | 1793.7718       | 897.3895        |
|         | 315.1663        | 158.0868        | 3  | I      | 14 | 1679.7289       | 840.3681        |
|         | 402.1983        | 201.6028        | 4  | S      | 13 | 1566.6448       | 783.8260        |
|         | 583.2123        | 292.1098        | 5  | T[181] | 12 | 1479.6128       | 740.3100        |
|         | 711.3073        | 356.1573        | 6  | K      | 11 | 1298.5988       | 649.8030        |
|         | 878.3057        | 439.6565        | 7  | S[167] | 10 | 1170.5038       | 585.7555        |
|         | 991.3897        | 496.1985        | 8  | L      | 9  | 1003.5054       | 502.2564        |
|         | 1120.4323       | 560.7198        | 9  | E      | 8  | 890.4214        | 445.7143        |
|         | 1217.4851       | 609.2462        | 10 | P      | 7  | 761.3788        | 381.1930        |
|         | 1304.5171       | 652.7622        | 11 | S      | 6  | 664.3260        | 332.6667        |
|         | 1391.5491       | 696.2782        | 12 | S      | 5  | 577.2940        | 289.1506        |
|         | 1520.5917       | 760.7995        | 13 | E      | 4  | 490.2620        | 245.6346        |
|         | 1607.6238       | 804.3155        | 14 | S      | 3  | 361.2194        | 181.1133        |
|         | 1706.6922       | 853.8497        | 15 | V      | 2  | 274.1874        | 137.5973        |
|         |                 |                 | 16 | R      | 1  | 175.1190        | 88.0631         |

# Annotated spectra from Saleem et. al. 2009

K.SNIS<sub>167</sub>TKS<sub>167</sub>LEPSES<sub>167</sub>VR.Q/2

0.935

1e+04

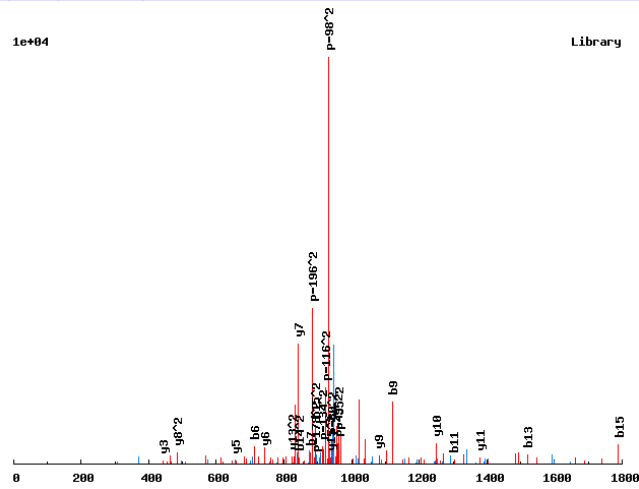

| Library | b <sup>1+</sup> | b <sup>2+</sup> | #  | AA     | #  | y <sup>1+</sup> | y <sup>2+</sup> |
|---------|-----------------|-----------------|----|--------|----|-----------------|-----------------|
|         | 88.0393         | 44.5233         | 1  | S      | 16 |                 |                 |
|         | 202.0822        | 101.5448        | 2  | N      | 15 | 1873.7381       | 937.3727        |
|         | 315.1663        | 158.0868        | 3  | I      | 14 | 1759.6952       | 880.3512        |
|         | 482.1647        | 241.5860        | 4  | S[167] | 13 | 1646.6111       | 823.8092        |
|         | 583.2123        | 292.1098        | 5  | T      | 12 | 1479.6128       | 740.3100        |
|         | 711.3073        | 356.1573        | 6  | K      | 11 | 1378.5651       | 689.7862        |
|         | 878.3057        | 439.6565        | 7  | S[167] | 10 | 1250.4701       | 625.7387        |
|         | 991.3897        | 496.1985        | 8  | L      | 9  | 1083.4718       | 542.2395        |
|         | 1120.4323       | 560.7198        | 9  | E      | 8  | 970.3877        | 485.6975        |
|         | 1217.4851       | 609.2462        | 10 | P      | 7  | 841.3451        | 421.1762        |
|         | 1304.5171       | 652.7622        | 11 | S      | 6  | 744.2924        | 372.6498        |
|         | 1391.5491       | 696.2782        | 12 | S      | 5  | 657.2603        | 329.1338        |
|         | 1520.5917       | 760.7995        | 13 | E      | 4  | 570.2283        | 285.6178        |
|         | 1687.5901       | 844.2987        | 14 | S[167] | 3  | 441.1857        | 221.0965        |
|         | 1786.6585       | 893.8329        | 15 | V      | 2  | 274.1874        | 137.5973        |
|         |                 |                 | 16 | R      | 1  | 175.1190        | 88.0631         |



# Annotated spectra from Saleem et. al. 2009

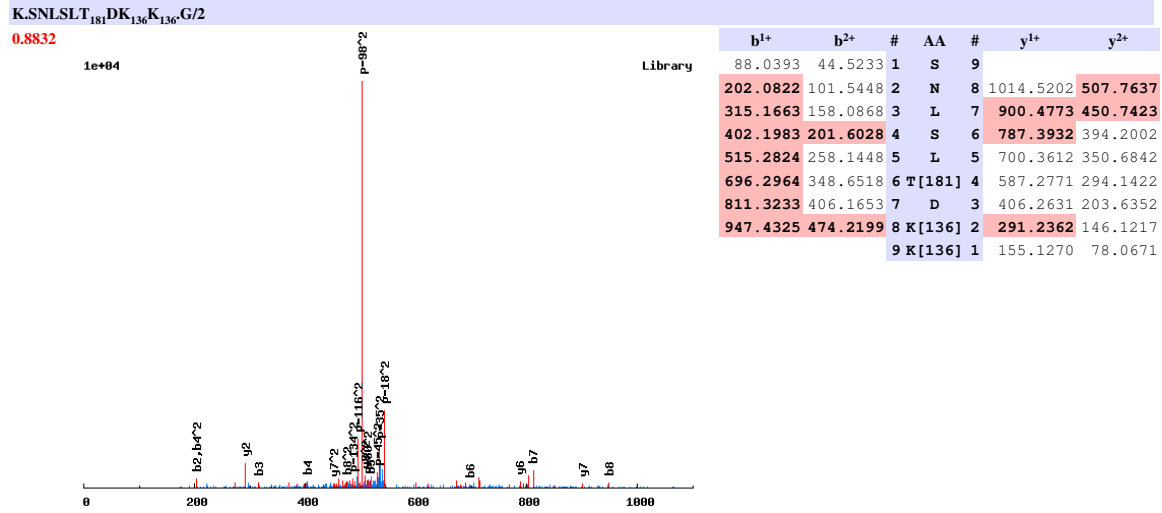

# Annotated spectra from Saleem et. al. 2009

K.SNNEVT<sub>181</sub>EHSDSEDLTEK.Q/3

0.5852

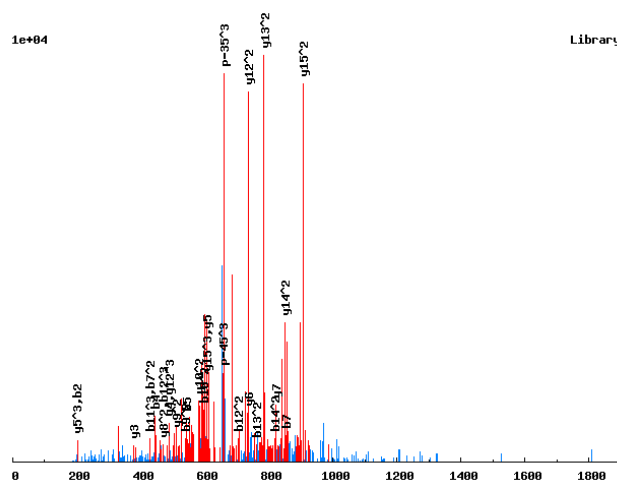

| Library | b <sup>1+</sup> | b <sup>2+</sup> | b <sup>3+</sup> | #  | AA      | #  | y <sup>1+</sup> | y <sup>2+</sup> | y <sup>3+</sup> |
|---------|-----------------|-----------------|-----------------|----|---------|----|-----------------|-----------------|-----------------|
|         | 88.0393         | 44.5233         | 30.0180         | 1  | S       | 17 |                 |                 |                 |
|         | <b>202.0822</b> | 101.5448        | 68.0323         | 2  | N       | 16 | 1926.7600       | 963.8837        | 642.9249        |
|         | 316.1252        | 158.5662        | 106.0466        | 3  | N       | 15 | 1812.7171       | <b>906.8622</b> | <b>604.9106</b> |
|         | <b>445.1678</b> | 223.0875        | 149.0608        | 4  | E       | 14 | 1698.6742       | <b>849.8407</b> | 566.8962        |
|         | <b>544.2362</b> | 272.6217        | 182.0836        | 5  | V       | 13 | 1569.6316       | <b>785.3194</b> | 523.8820        |
|         | 725.2502        | 363.1287        | 242.4216        | 6  | T [181] | 12 | 1470.5632       | <b>735.7852</b> | <b>490.8592</b> |
|         | <b>854.2928</b> | <b>427.6500</b> | 285.4358        | 7  | E       | 11 | 1289.5492       | 645.2782        | 430.5212        |
|         | 991.3517        | 496.1795        | 331.1221        | 8  | H       | 10 | 1160.5066       | <b>580.7569</b> | 387.5070        |
|         | 1078.3837       | <b>539.6955</b> | 360.1328        | 9  | S       | 9  | 1023.4477       | <b>512.2275</b> | 341.8207        |
|         | 1193.4107       | <b>597.2090</b> | 398.4751        | 10 | D       | 8  | 936.4156        | <b>468.7115</b> | 312.8101        |
|         | 1280.4427       | 640.7250        | <b>427.4857</b> | 11 | S       | 7  | <b>821.3887</b> | 411.1980        | 274.4678        |
|         | 1409.4853       | <b>705.2463</b> | <b>470.4999</b> | 12 | E       | 6  | <b>734.3567</b> | 367.6820        | 245.4571        |
|         | 1524.5122       | <b>762.7597</b> | 508.8423        | 13 | D       | 5  | <b>605.3141</b> | 303.1607        | <b>202.4429</b> |
|         | 1637.5963       | <b>819.3018</b> | 546.5369        | 14 | L       | 4  | <b>490.2871</b> | 245.6472        | 164.1006        |
|         | 1738.6440       | 869.8256        | 580.2195        | 15 | T       | 3  | <b>377.2031</b> | 189.1052        | 126.4059        |
|         | 1867.6865       | 934.3469        | 623.2337        | 16 | E       | 2  | 276.1554        | 138.5813        | 92.7233         |
|         |                 |                 |                 | 17 | K       | 1  | 147.1128        | 74.0600         | 49.7091         |

# Annotated spectra from Saleem et. al. 2009

R.S<sub>167</sub>NSAHS<sub>167</sub>ALNAR.N/2

0.9873

1e+04

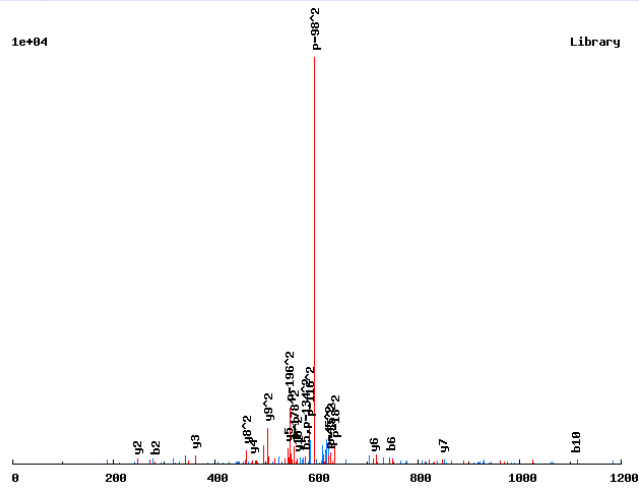

| Library | b <sup>1+</sup>  | b <sup>2+</sup> | #  | AA | #     | y <sup>1+</sup> | y <sup>2+</sup> |          |
|---------|------------------|-----------------|----|----|-------|-----------------|-----------------|----------|
|         | 168.0056         | 84.5065         | 1  | S  | [167] | 11              |                 |          |
|         | <b>282.0486</b>  | 141.5279        | 2  | N  | 10    | 1120.4895       | <b>560.7484</b> |          |
|         | 369.0806         | 185.0439        | 3  | S  | 9     | 1006.4466       | <b>503.7269</b> |          |
|         | 440.1177         | 220.5625        | 4  | A  | 8     | 919.4145        | <b>460.2109</b> |          |
|         | <b>577.1766</b>  | 289.0920        | 5  | H  | 7     | <b>848.3774</b> | 424.6924        |          |
|         | <b>744.1750</b>  | 372.5911        | 6  | S  | [167] | 6               | <b>711.3185</b> | 356.1629 |
|         | 815.2121         | 408.1097        | 7  | A  | 5     | <b>544.3202</b> | 272.6637        |          |
|         | 928.2962         | 464.6517        | 8  | L  | 4     | <b>473.2830</b> | 237.1452        |          |
|         | 1042.3391        | 521.6732        | 9  | N  | 3     | <b>360.1990</b> | 180.6031        |          |
|         | <b>1113.3762</b> | 557.1917        | 10 | A  | 2     | <b>246.1561</b> | 123.5817        |          |
|         |                  |                 | 11 | R  | 1     | 175.1190        | 88.0631         |          |

# Annotated spectra from Saleem et. al. 2009

K.SNS<sub>167</sub>IYR<sub>166</sub>PIR<sub>166</sub>-K/3

0.9912

1e+04

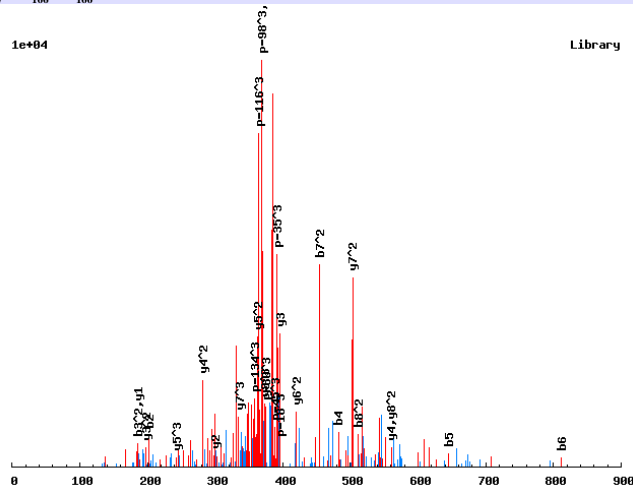

| Library | b <sup>1+</sup> | b <sup>2+</sup> | b <sup>3+</sup> | # | AA     | # | y <sup>1+</sup> | y <sup>2+</sup> | y <sup>3+</sup> |
|---------|-----------------|-----------------|-----------------|---|--------|---|-----------------|-----------------|-----------------|
|         | 88.0393         | 44.5233         | 30.0180         | 1 | S      | 9 |                 |                 |                 |
|         | <b>202.0822</b> | 101.5448        | 68.0323         | 2 | N      | 8 | 1118.5621       | <b>559.7847</b> | <b>373.5256</b> |
|         | <b>369.0806</b> | <b>185.0439</b> | 123.6984        | 3 | S[167] | 7 | 1004.5192       | <b>502.7632</b> | <b>335.5112</b> |
|         | <b>482.1647</b> | 241.5860        | 161.3931        | 4 | I      | 6 | 837.5208        | <b>419.2640</b> | 279.8451        |
|         | <b>645.2280</b> | 323.1176        | 215.7475        | 5 | Y      | 5 | 724.4367        | <b>362.7220</b> | <b>242.1504</b> |
|         | <b>811.3374</b> | 406.1723        | 271.1173        | 6 | R[166] | 4 | <b>561.3734</b> | <b>281.1903</b> | 187.7960        |
|         | 908.3901        | <b>454.6987</b> | 303.4682        | 7 | P      | 3 | <b>395.2640</b> | <b>198.1357</b> | 132.4262        |
|         | 1021.4742       | <b>511.2407</b> | 341.1629        | 8 | I      | 2 | <b>298.2113</b> | 149.6093        | 100.0753        |
|         |                 |                 |                 | 9 | R[166] | 1 | <b>185.1272</b> | 93.0672         | 62.3806         |

# Annotated spectra from Saleem et. al. 2009

R.S<sub>167</sub>NSLFQR<sub>166</sub>.D/2

0.9287

1e+04

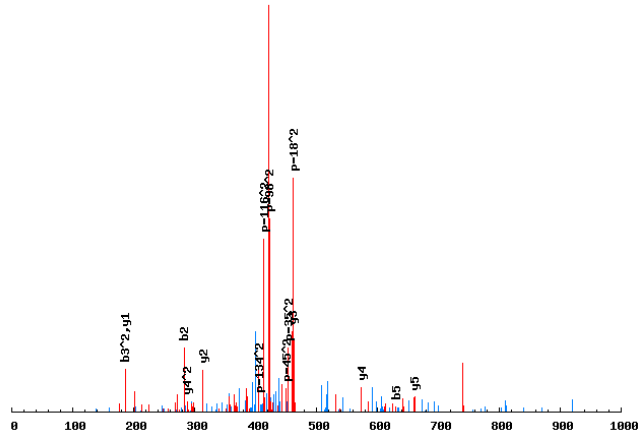

| Library | b <sup>1+</sup> | b <sup>2+</sup> | # | AA | #     | y <sup>1+</sup> | y <sup>2+</sup> |         |
|---------|-----------------|-----------------|---|----|-------|-----------------|-----------------|---------|
|         | 168.0056        | 84.5065         | 1 | S  | [167] | 7               |                 |         |
|         | <b>282.0486</b> | 141.5279        | 2 | N  | 6     | 774.4132        | 387.7103        |         |
|         | 369.0806        | <b>185.0439</b> | 3 | S  | 5     | 660.3703        | 330.6888        |         |
|         | 482.1647        | 241.5860        | 4 | L  | 4     | 573.3383        | <b>287.1728</b> |         |
|         | <b>629.2331</b> | 315.1202        | 5 | F  | 3     | 460.2542        | 230.6307        |         |
|         | 757.2917        | 379.1495        | 6 | Q  | 2     | 313.1858        | 157.0965        |         |
|         |                 |                 | 7 | R  | [166] | 1               | 185.1272        | 93.0672 |

# Annotated spectra from Saleem et. al. 2009

K.S<sub>167</sub>NSLSS<sub>167</sub>DGNSNQDVEIGK.S/2

0.998

1e+04

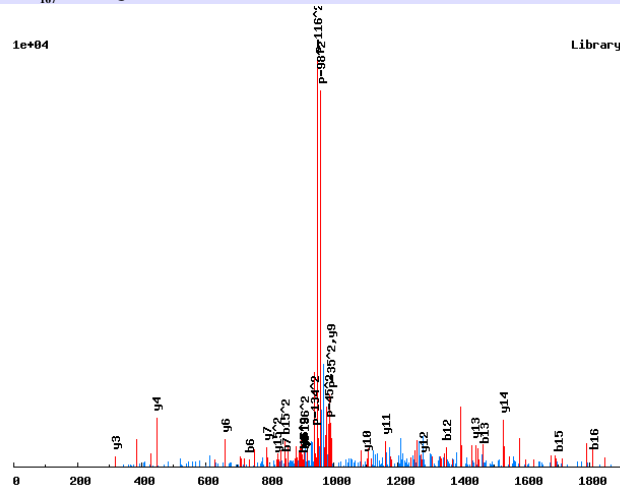

| Library | b <sup>1+</sup> | b <sup>2+</sup> | #  | AA | #        | y <sup>1+</sup> | y <sup>2+</sup> |
|---------|-----------------|-----------------|----|----|----------|-----------------|-----------------|
|         | 168.0056        | 84.5065         | 1  | S  | [167] 18 |                 |                 |
|         | 282.0486        | 141.5279        | 2  | N  | 17       | 1843.7705       | 922.3889        |
|         | 369.0806        | 185.0439        | 3  | S  | 16       | 1729.7276       | 865.3674        |
|         | 482.1647        | 241.5860        | 4  | L  | 15       | 1642.6956       | 821.8514        |
|         | 569.1967        | 285.1020        | 5  | S  | 14       | 1529.6115       | 765.3094        |
|         | 736.1951        | 368.6012        | 6  | S  | [167] 13 | 1442.5795       | 721.7934        |
|         | 851.2220        | 426.1146        | 7  | D  | 12       | 1275.5811       | 638.2942        |
|         | 908.2435        | 454.6254        | 8  | G  | 11       | 1160.5542       | 580.7807        |
|         | 1022.2864       | 511.6468        | 9  | N  | 10       | 1103.5327       | 552.2700        |
|         | 1109.3184       | 555.1628        | 10 | S  | 9        | 989.4898        | 495.2485        |
|         | 1223.3613       | 612.1843        | 11 | N  | 8        | 902.4578        | 451.7325        |
|         | 1351.4199       | 676.2136        | 12 | Q  | 7        | 788.4148        | 394.7111        |
|         | 1466.4469       | 733.7271        | 13 | D  | 6        | 660.3563        | 330.6818        |
|         | 1565.5153       | 783.2613        | 14 | V  | 5        | 545.3293        | 273.1683        |
|         | 1694.5579       | 847.7826        | 15 | E  | 4        | 446.2609        | 223.6341        |
|         | 1807.6419       | 904.3246        | 16 | I  | 3        | 317.2183        | 159.1128        |
|         | 1864.6634       | 932.8353        | 17 | G  | 2        | 204.1343        | 102.5708        |
|         |                 |                 | 18 | K  | 1        | 147.1128        | 74.0600         |

Annotated spectra from Saleem et. al. 2009

R.S<sub>167</sub>NSNKQEDS<sub>167</sub>DDTEGKAGTTNDDTSHKPC<sub>160</sub>SQK.Y/4

0.5883

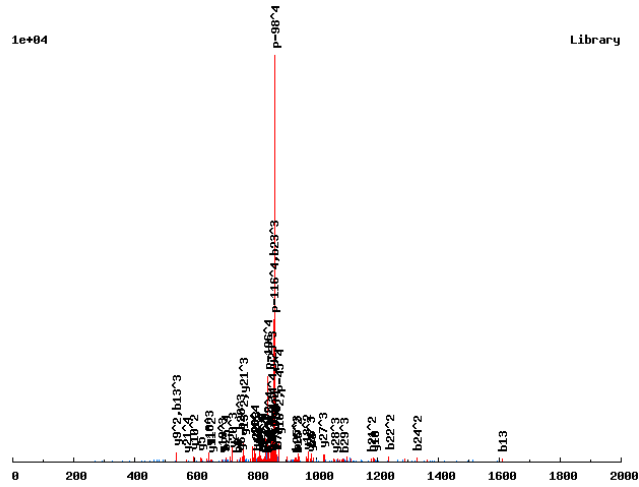

| Library | b <sup>1+</sup> | b <sup>2+</sup> | b <sup>3+</sup> | b <sup>4+</sup> | #  | AA | #        | y <sup>1+</sup> | y <sup>2+</sup> | y <sup>3+</sup> | y <sup>4+</sup> |
|---------|-----------------|-----------------|-----------------|-----------------|----|----|----------|-----------------|-----------------|-----------------|-----------------|
|         | 168.0056        | 84.5065         | 56.6734         | 42.7569         | 1  | S  | [167] 31 |                 |                 |                 |                 |
|         | 282.0486        | 141.5279        | 94.6877         | 71.2676         | 2  | N  | 30       | 3374.3710       | 1687.6892       | 1125.4619       | 844.3482        |
|         | 369.0806        | 185.0439        | 123.6984        | 93.0256         | 3  | S  | 29       | 3260.3281       | 1630.6677       | 1087.4476       | 815.8375        |
|         | 483.1235        | 242.0654        | 161.7127        | 121.5363        | 4  | N  | 28       | 3173.2961       | 1587.1517       | 1058.4369       | 794.0795        |
|         | 611.2185        | 306.1129        | 204.4110        | 153.5601        | 5  | K  | 27       | 3059.2531       | 1530.1302       | 1020.4226       | 765.5687        |
|         | 739.2771        | 370.1422        | 247.0972        | 185.5747        | 6  | Q  | 26       | 2931.1582       | 1466.0827       | 977.7242        | 733.5450        |
|         | 868.3197        | 434.6635        | 290.1114        | 217.8354        | 7  | E  | 25       | 2803.0996       | 1402.0534       | 935.0381        | 701.5304        |
|         | 983.3466        | 492.1769        | 328.4537        | 246.5921        | 8  | D  | 24       | 2674.0570       | 1337.5321       | 892.0239        | 669.2697        |
|         | 1150.3450       | 575.6761        | 384.1198        | 288.3417        | 9  | S  | [167] 23 | 2559.0301       | 1280.0187       | 853.6815        | 640.5130        |
|         | 1265.3719       | 633.1896        | 422.4622        | 317.0984        | 10 | D  | 22       | 2392.0317       | 1196.5195       | 798.0154        | 598.7634        |
|         | 1380.3988       | 690.7031        | 460.8045        | 345.8552        | 11 | D  | 21       | 2277.0048       | 1139.0060       | 759.6731        | 570.0067        |
|         | 1481.4465       | 741.2269        | 494.4870        | 371.1171        | 12 | T  | 20       | 2161.9778       | 1081.4926       | 721.3308        | 541.2499        |
|         | 1610.4891       | 805.7482        | 537.5012        | 403.3777        | 13 | E  | 19       | 2060.9302       | 1030.9687       | 687.6482        | 515.9880        |
|         | 1667.5106       | 834.2589        | 556.5084        | 417.6331        | 14 | G  | 18       | 1931.8876       | 966.4474        | 644.6340        | 483.7274        |
|         | 1795.6055       | 898.3064        | 599.2067        | 449.6568        | 15 | K  | 17       | 1874.8661       | 937.9367        | 625.6269        | 469.4720        |
|         | 1866.6426       | 933.8250        | 622.8857        | 467.4161        | 16 | A  | 16       | 1746.7711       | 873.8892        | 582.9286        | 437.4482        |
|         | 1923.6641       | 962.3357        | 641.8929        | 481.6715        | 17 | G  | 15       | 1675.7340       | 838.3707        | 559.2495        | 419.6890        |
|         | 2024.7118       | 1012.8595       | 675.5754        | 506.9334        | 18 | T  | 14       | 1618.7126       | 809.8599        | 540.2424        | 405.4336        |
|         | 2125.7595       | 1063.3834       | 709.2580        | 532.1953        | 19 | T  | 13       | 1517.6649       | 759.3361        | 506.5598        | 380.1717        |
|         | 2239.8024       | 1120.4048       | 747.2723        | 560.7061        | 20 | N  | 12       | 1416.6172       | 708.8122        | 472.8773        | 354.9098        |
|         | 2354.8293       | 1177.9183       | 785.6146        | 589.4628        | 21 | D  | 11       | 1302.5743       | 651.7908        | 434.8629        | 326.3990        |
|         | 2469.8563       | 1235.4318       | 823.9569        | 618.2195        | 22 | D  | 10       | 1187.5473       | 594.2773        | 396.5206        | 297.6423        |
|         | 2570.9040       | 1285.9556       | 857.6395        | 643.4814        | 23 | T  | 9        | 1072.5204       | 536.7638        | 358.1783        | 268.8856        |
|         | 2657.9360       | 1329.4716       | 886.6502        | 665.2395        | 24 | S  | 8        | 971.4727        | 486.2400        | 324.4958        | 243.6236        |
|         | 2794.9949       | 1398.0011       | 932.3365        | 699.5042        | 25 | H  | 7        | 884.4407        | 442.7240        | 295.4851        | 221.8656        |
|         | 2923.0899       | 1462.0486       | 975.0348        | 731.5279        | 26 | K  | 6        | 747.3818        | 374.1945        | 249.7988        | 187.6009        |
|         | 3020.1426       | 1510.5749       | 1007.3857       | 755.7911        | 27 | P  | 5        | 619.2868        | 310.1471        | 207.1005        | 155.5772        |
|         | 3180.1733       | 1590.5903       | 1060.7293       | 795.7988        | 28 | C  | [160] 4  | 522.2341        | 261.6207        | 174.7495        | 131.3140        |
|         | 3267.2053       | 1634.1063       | 1089.7400       | 817.5568        | 29 | S  | 3        | 362.2034        | 181.6053        | 121.4060        | 91.3063         |
|         | 3395.2639       | 1698.1356       | 1132.4261       | 849.5714        | 30 | Q  | 2        | 275.1714        | 138.0893        | 92.3953         | 69.5483         |
|         |                 |                 |                 |                 | 31 | K  | 1        | 147.1128        | 74.0600         | 49.7091         | 37.5337         |

# Annotated spectra from Saleem et. al. 2009

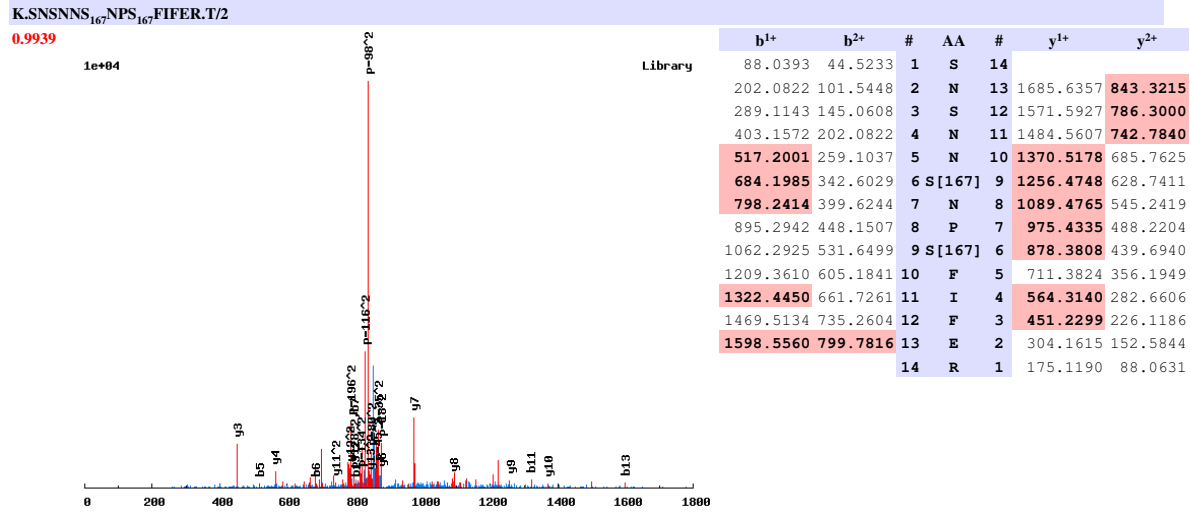



# Annotated spectra from Saleem et. al. 2009

K.SNSS<sub>167</sub>NSY<sub>243</sub>ELESGR<sub>166</sub>S/2

0.959

1e+04

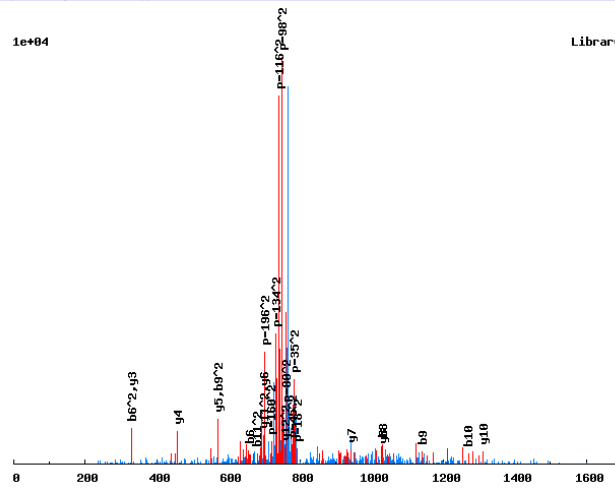

| Library | b <sup>1+</sup> | b <sup>2+</sup> | #  | AA      | #  | y <sup>1+</sup> | y <sup>2+</sup> |
|---------|-----------------|-----------------|----|---------|----|-----------------|-----------------|
|         | 88.0393         | 44.5233         | 1  | S       | 13 |                 |                 |
|         | 202.0822        | 101.5448        | 2  | N       | 12 | 1512.5279       | 756.7676        |
|         | 289.1143        | 145.0608        | 3  | S       | 11 | 1398.4850       | 699.7461        |
|         | 456.1126        | 228.5600        | 4  | S [167] | 10 | 1311.4529       | 656.2301        |
|         | 570.1556        | 285.5814        | 5  | N       | 9  | 1144.4546       | 572.7309        |
|         | 657.1876        | 329.0974        | 6  | S       | 8  | 1030.4116       | 515.7095        |
|         | 900.2173        | 450.6123        | 7  | Y [243] | 7  | 943.3796        | 472.1934        |
|         | 1029.2598       | 515.1336        | 8  | E       | 6  | 700.3499        | 350.6786        |
|         | 1142.3439       | 571.6756        | 9  | L       | 5  | 571.3074        | 286.1573        |
|         | 1271.3865       | 636.1969        | 10 | E       | 4  | 458.2233        | 229.6153        |
|         | 1358.4185       | 679.7129        | 11 | S       | 3  | 329.1807        | 165.0940        |
|         | 1415.4400       | 708.2236        | 12 | G       | 2  | 242.1487        | 121.5780        |
|         |                 |                 | 13 | R [166] | 1  | 185.1272        | 93.0672         |

# Annotated spectra from Saleem et. al. 2009

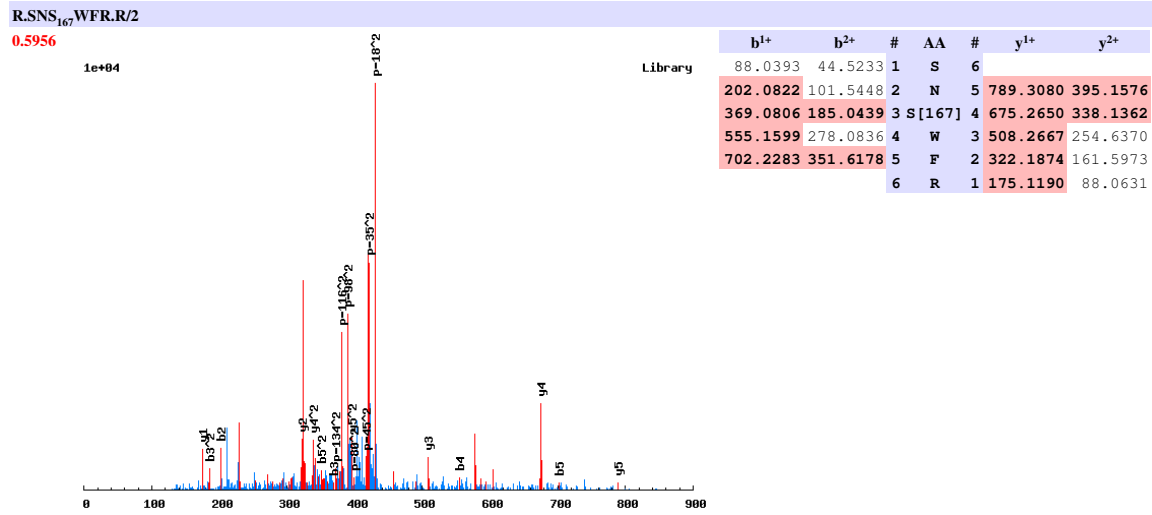

# Annotated spectra from Saleem et. al. 2009

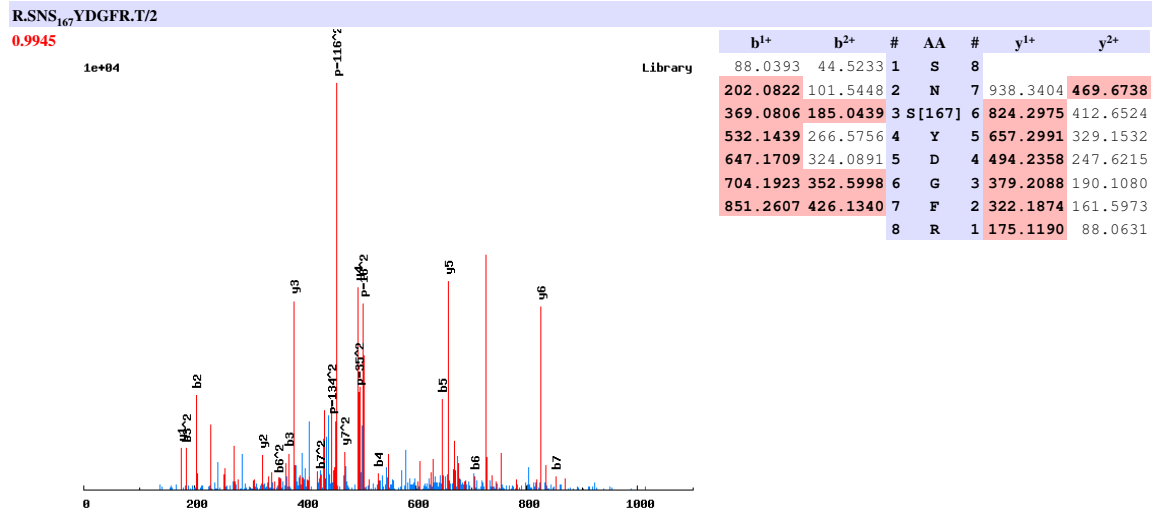

# Annotated spectra from Saleem et. al. 2009

R.SNLTLDY<sub>243</sub>MHSNKAS<sub>167</sub>PFSSR.R/3

0.8831

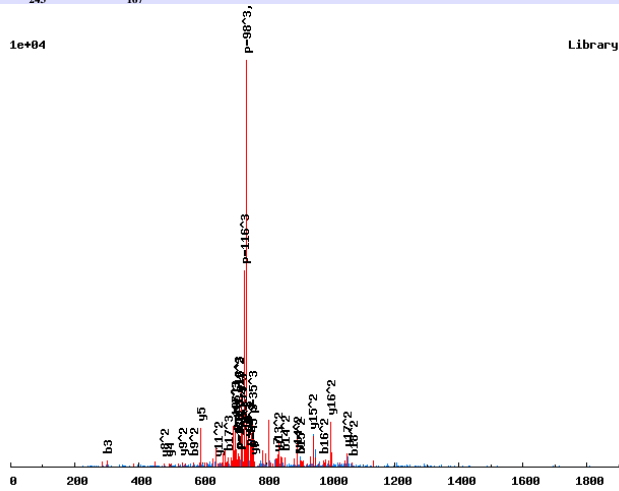

| Library | b <sup>1+</sup> | b <sup>2+</sup> | b <sup>3+</sup> | #  | AA     | #  | y <sup>1+</sup> | y <sup>2+</sup> | y <sup>3+</sup> |
|---------|-----------------|-----------------|-----------------|----|--------|----|-----------------|-----------------|-----------------|
|         | 88.0393         | 44.5233         | 30.0180         | 1  | S      | 19 |                 |                 |                 |
|         | 202.0822        | 101.5448        | 68.0323         | 2  | N      | 18 | 2215.8879       | 1108.4476       | 739.3008        |
|         | 303.1299        | 152.0686        | 101.7148        | 3  | T      | 17 | 2101.8450       | 1051.4261       | 701.2865        |
|         | 416.2140        | 208.6106        | 139.4095        | 4  | L      | 16 | 2000.7973       | 1000.9023       | 667.6040        |
|         | 517.2617        | 259.1345        | 173.0921        | 5  | T      | 15 | 1887.7133       | 944.3603        | 629.9093        |
|         | 632.2886        | 316.6479        | 211.4344        | 6  | D      | 14 | 1786.6656       | 893.8364        | 596.2267        |
|         | 875.3183        | 438.1628        | 292.4443        | 7  | Y[243] | 13 | 1671.6386       | 836.3230        | 557.8844        |
|         | 1006.3588       | 503.6830        | 336.1244        | 8  | M      | 12 | 1428.6090       | 714.8081        | 476.8745        |
|         | 1143.4177       | 572.2125        | 381.8107        | 9  | H      | 11 | 1297.5685       | 649.2879        | 433.1943        |
|         | 1230.4497       | 615.7285        | 410.8214        | 10 | S      | 10 | 1160.5096       | 580.7584        | 387.5080        |
|         | 1344.4926       | 672.7500        | 448.8357        | 11 | N      | 9  | 1073.4775       | 537.2424        | 358.4974        |
|         | 1472.5876       | 736.7974        | 491.5340        | 12 | K      | 8  | 959.4346        | 480.2209        | 320.4831        |
|         | 1543.6247       | 772.3160        | 515.2131        | 13 | A      | 7  | 831.3397        | 416.1735        | 277.7847        |
|         | 1710.6231       | 855.8152        | 570.8792        | 14 | S[167] | 6  | 760.3025        | 380.6549        | 254.1057        |
|         | 1807.6758       | 904.3415        | 603.2301        | 15 | P      | 5  | 593.3042        | 297.1557        | 198.4396        |
|         | 1954.7442       | 977.8758        | 652.2529        | 16 | F      | 4  | 496.2514        | 248.6293        | 166.0887        |
|         | 2041.7763       | 1021.3918       | 681.2636        | 17 | S      | 3  | 349.1830        | 175.0951        | 117.0659        |
|         | 2128.8083       | 1064.9078       | 710.2743        | 18 | S      | 2  | 262.1510        | 131.5791        | 88.0552         |
|         |                 |                 |                 | 19 | R      | 1  | 175.1190        | 88.0631         | 59.0445         |

# Annotated spectra from Saleem et. al. 2009

R.S<sub>167</sub>NTSLNLNQVSSLSK<sub>136</sub>/T/2

0.9996

1e+04

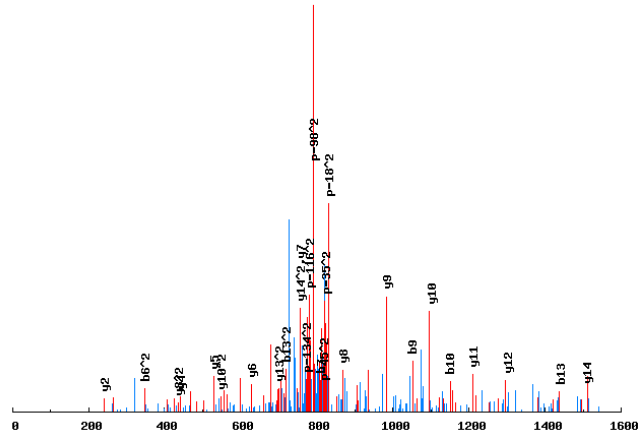

| Library | b <sup>1+</sup> | b <sup>2+</sup> | #  | AA | #     | y <sup>1+</sup> | y <sup>2+</sup> |         |
|---------|-----------------|-----------------|----|----|-------|-----------------|-----------------|---------|
|         | 168.0056        | 84.5065         | 1  | S  | [167] | 15              |                 |         |
|         | 282.0486        | 141.5279        | 2  | N  | 14    | 1511.8519       | 756.4296        |         |
|         | 383.0963        | 192.0518        | 3  | T  | 13    | 1397.8090       | 699.4081        |         |
|         | 470.1283        | 235.5678        | 4  | S  | 12    | 1296.7613       | 648.8843        |         |
|         | 583.2123        | 292.1098        | 5  | L  | 11    | 1209.7292       | 605.3683        |         |
|         | 696.2964        | 348.6518        | 6  | L  | 10    | 1096.6452       | 548.8262        |         |
|         | 810.3393        | 405.6733        | 7  | N  | 9     | 983.5611        | 492.2842        |         |
|         | 923.4234        | 462.2153        | 8  | L  | 8     | 869.5182        | 435.2627        |         |
|         | 1051.4820       | 526.2446        | 9  | Q  | 7     | 756.4341        | 378.7207        |         |
|         | 1150.5504       | 575.7788        | 10 | V  | 6     | 628.3756        | 314.6914        |         |
|         | 1237.5824       | 619.2948        | 11 | S  | 5     | 529.3071        | 265.1572        |         |
|         | 1324.6144       | 662.8109        | 12 | S  | 4     | 442.2751        | 221.6412        |         |
|         | 1437.6985       | 719.3529        | 13 | L  | 3     | 355.2431        | 178.1252        |         |
|         | 1524.7305       | 762.8689        | 14 | S  | 2     | 242.1590        | 121.5832        |         |
|         |                 |                 | 15 | K  | [136] | 1               | 155.1270        | 78.0671 |

# Annotated spectra from Saleem et. al. 2009

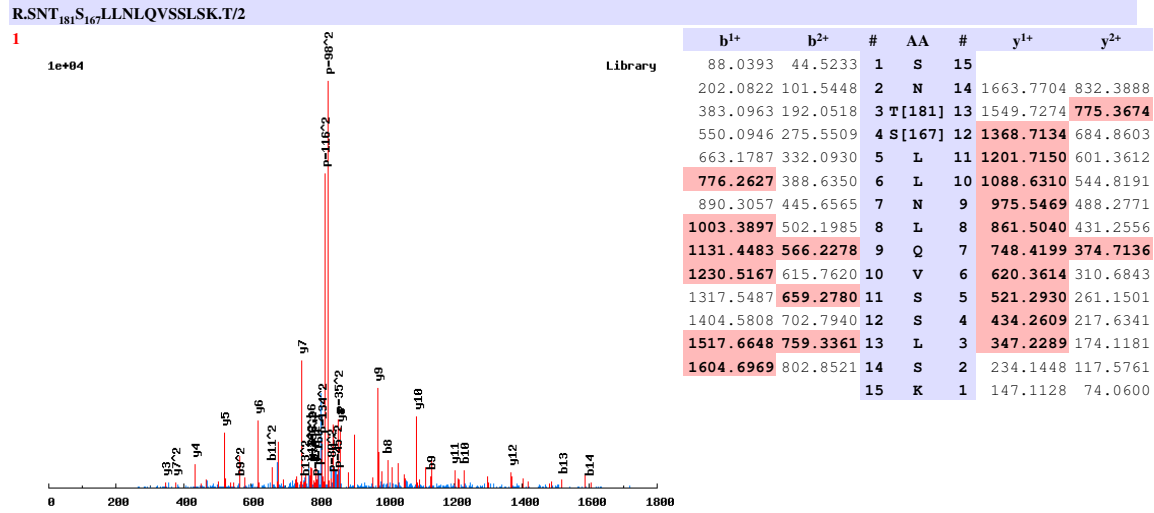

# Annotated spectra from Saleem et. al. 2009

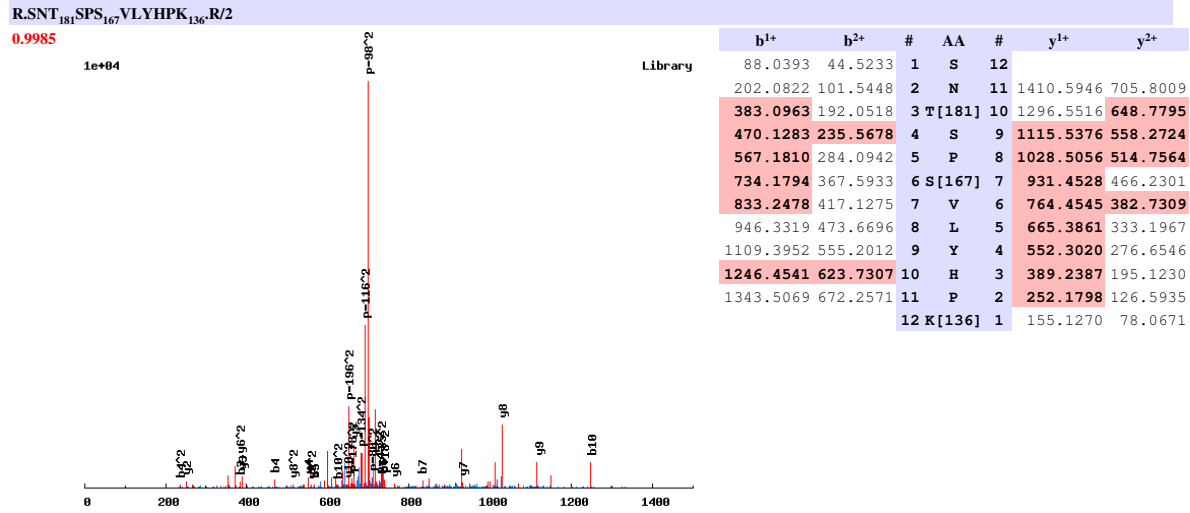

# Annotated spectra from Saleem et. al. 2009

K.SNVPS<sub>167</sub>PVS<sub>167</sub>R<sub>166</sub>S/2

0.9848

1e+04

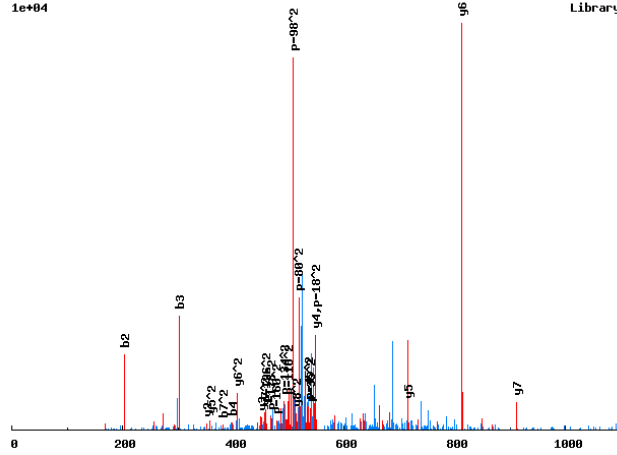

| Library | b <sup>1+</sup> | b <sup>2+</sup> | # | AA     | # | y <sup>1+</sup> | y <sup>2+</sup> |
|---------|-----------------|-----------------|---|--------|---|-----------------|-----------------|
|         | 88.0393         | 44.5233         | 1 | S      | 9 |                 |                 |
|         | 202.0822        | 101.5448        | 2 | N      | 8 | 1025.4092       | 513.2082        |
|         | 301.1506        | 151.0790        | 3 | V      | 7 | 911.3663        | 456.1868        |
|         | 398.2034        | 199.6053        | 4 | P      | 6 | 812.2979        | 406.6526        |
|         | 565.2018        | 283.1045        | 5 | S[167] | 5 | 715.2451        | 358.1262        |
|         | 662.2545        | 331.6309        | 6 | P      | 4 | 548.2468        | 274.6270        |
|         | 761.3229        | 381.1651        | 7 | V      | 3 | 451.1940        | 226.1006        |
|         | 928.3213        | 464.6643        | 8 | S[167] | 2 | 352.1256        | 176.5664        |
|         |                 |                 | 9 | R[166] | 1 | 185.1272        | 93.0672         |



# Annotated spectra from Saleem et. al. 2009

K.SPFANGFSPNS<sub>167</sub>PK<sub>136</sub>S<sub>167</sub>PR<sub>166</sub>-D/3

0.7239

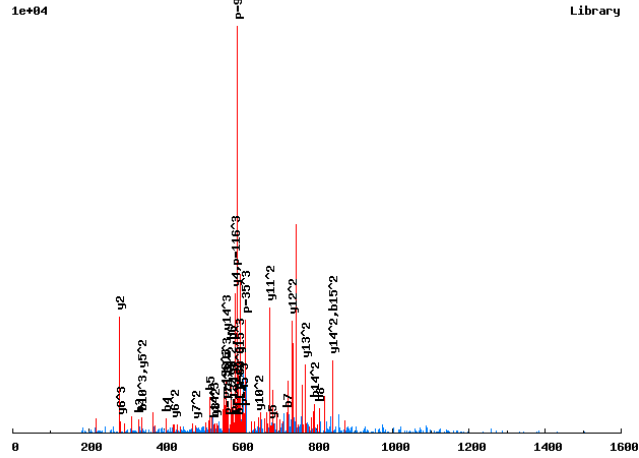

| Library | b <sup>1+</sup> | b <sup>2+</sup> | b <sup>3+</sup> | #  | AA     | #  | y <sup>1+</sup> | y <sup>2+</sup> | y <sup>3+</sup> |
|---------|-----------------|-----------------|-----------------|----|--------|----|-----------------|-----------------|-----------------|
|         | 88.0393         | 44.5233         | 30.0180         | 1  | S      | 16 |                 |                 |                 |
|         | 185.0921        | 93.0497         | 62.3689         | 2  | P      | 15 | 1780.7574       | 890.8823        | 594.2573        |
|         | 332.1605        | 166.5839        | 111.3917        | 3  | F      | 14 | 1683.7047       | 842.3560        | 561.9064        |
|         | 403.1976        | 202.1024        | 135.0707        | 4  | A      | 13 | 1536.6363       | 768.8218        | 512.8836        |
|         | 517.2405        | 259.1239        | 173.0850        | 5  | N      | 12 | 1465.5991       | 733.3032        | 489.2046        |
|         | 574.2620        | 287.6346        | 192.0922        | 6  | G      | 11 | 1351.5562       | 676.2817        | 451.1903        |
|         | 721.3304        | 361.1688        | 241.1150        | 7  | F      | 10 | 1294.5347       | 647.7710        | 432.1831        |
|         | 808.3624        | 404.6848        | 270.1257        | 8  | S      | 9  | 1147.4663       | 574.2368        | 383.1603        |
|         | 905.4152        | 453.2112        | 302.4766        | 9  | P      | 8  | 1060.4343       | 530.7208        | 354.1496        |
|         | 1019.4581       | 510.2327        | 340.4909        | 10 | N      | 7  | 963.3816        | 482.1944        | 321.7987        |
|         | 1186.4565       | 593.7319        | 396.1570        | 11 | S[167] | 6  | 849.3386        | 425.1730        | 283.7844        |
|         | 1283.5092       | 642.2583        | 428.5079        | 12 | P      | 5  | 682.3403        | 341.6738        | 228.1183        |
|         | 1419.6184       | 710.3128        | 473.8776        | 13 | K[136] | 4  | 585.2875        | 293.1474        | 195.7674        |
|         | 1586.6168       | 793.8120        | 529.5438        | 14 | S[167] | 3  | 449.1783        | 225.0928        | 150.3976        |
|         | 1683.6695       | 842.3384        | 561.8947        | 15 | P      | 2  | 282.1800        | 141.5936        | 94.7315         |
|         |                 |                 |                 | 16 | R[166] | 1  | 185.1272        | 93.0672         | 62.3806         |

# Annotated spectra from Saleem et. al. 2009

R.SPGRPSS<sub>167</sub>SQGEIKR.K/3

0.92

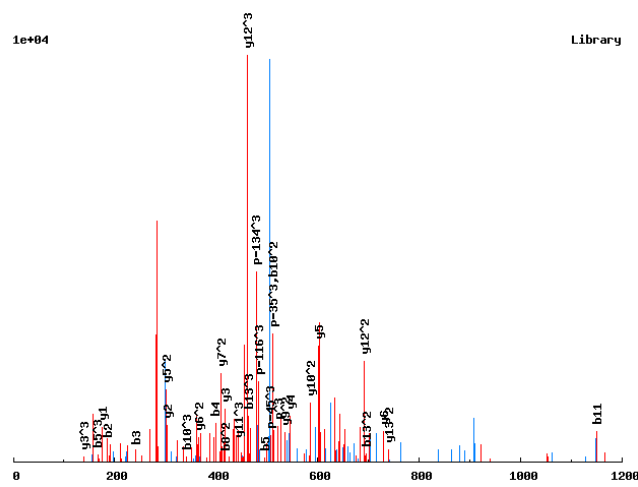

| Library | b <sup>1+</sup> | b <sup>2+</sup> | b <sup>3+</sup> | #  | AA     | #  | y <sup>1+</sup> | y <sup>2+</sup> | y <sup>3+</sup> |
|---------|-----------------|-----------------|-----------------|----|--------|----|-----------------|-----------------|-----------------|
|         | 88.0393         | 44.5233         | 30.0180         | 1  | S      | 14 |                 |                 |                 |
|         | 185.0921        | 93.0497         | 62.3689         | 2  | P      | 13 | 1478.7111       | 739.8592        | 493.5752        |
|         | 242.1135        | 121.5604        | 81.3760         | 3  | G      | 12 | 1381.6584       | 691.3328        | 461.2243        |
|         | 398.2146        | 199.6110        | 133.4097        | 4  | R      | 11 | 1324.6369       | 662.8221        | 442.2172        |
|         | 495.2674        | 248.1373        | 165.7607        | 5  | P      | 10 | 1168.5358       | 584.7715        | 390.1834        |
|         | 582.2994        | 291.6534        | 194.7713        | 6  | S      | 9  | 1071.4830       | 536.2452        | 357.8325        |
|         | 749.2978        | 375.1525        | 250.4375        | 7  | S[167] | 8  | 984.4510        | 492.7291        | 328.8219        |
|         | 836.3298        | 418.6686        | 279.4481        | 8  | S      | 7  | 817.4526        | 409.2300        | 273.1557        |
|         | 964.3884        | 482.6978        | 322.1343        | 9  | Q      | 6  | 730.4206        | 365.7139        | 244.1451        |
|         | 1021.4099       | 511.2086        | 341.1415        | 10 | G      | 5  | 602.3620        | 301.6847        | 201.4589        |
|         | 1150.4525       | 575.7299        | 384.1557        | 11 | E      | 4  | 545.3406        | 273.1739        | 182.4517        |
|         | 1263.5365       | 632.2719        | 421.8504        | 12 | I      | 3  | 416.2980        | 208.6526        | 139.4375        |
|         | 1391.6315       | 696.3194        | 464.5487        | 13 | K      | 2  | 303.2139        | 152.1106        | 101.7428        |
|         |                 |                 |                 | 14 | R      | 1  | 175.1190        | 88.0631         | 59.0445         |

# Annotated spectra from Saleem et. al. 2009

R.S<sub>167</sub>PGRPSS<sub>167</sub>SQGEIKR.K/3

0.9692

1e+04

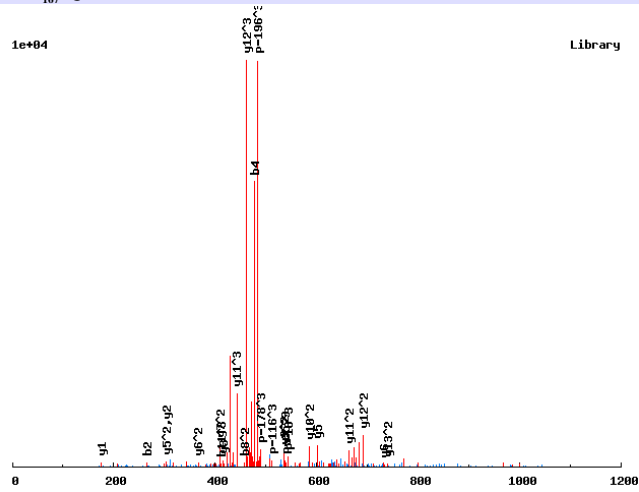

| Library | b <sup>1+</sup> | b <sup>2+</sup> | b <sup>3+</sup> | #  | AA     | #  | y <sup>1+</sup> | y <sup>2+</sup> | y <sup>3+</sup> |
|---------|-----------------|-----------------|-----------------|----|--------|----|-----------------|-----------------|-----------------|
|         | 168.0056        | 84.5065         | 56.6734         | 1  | S[167] | 14 |                 |                 |                 |
|         | <b>265.0584</b> | 133.0328        | 89.0243         | 2  | P      | 13 | 1478.7111       | <b>739.8592</b> | 493.5752        |
|         | 322.0799        | 161.5436        | 108.0315        | 3  | G      | 12 | 1381.6584       | <b>691.3328</b> | <b>461.2243</b> |
|         | <b>478.1810</b> | 239.5941        | 160.0652        | 4  | R      | 11 | 1324.6369       | <b>662.8221</b> | <b>442.2172</b> |
|         | 575.2337        | 288.1205        | 192.4161        | 5  | P      | 10 | 1168.5358       | <b>584.7715</b> | 390.1834        |
|         | 662.2658        | 331.6365        | 221.4268        | 6  | S      | 9  | 1071.4830       | <b>536.2452</b> | 357.8325        |
|         | 829.2641        | 415.1357        | 277.0929        | 7  | S[167] | 8  | 984.4510        | 492.7291        | 328.8219        |
|         | 916.2962        | <b>458.6517</b> | 306.1036        | 8  | S      | 7  | 817.4526        | <b>409.2300</b> | 273.1557        |
|         | 1044.3547       | 522.6810        | 348.7898        | 9  | Q      | 6  | <b>730.4206</b> | <b>365.7139</b> | 244.1451        |
|         | 1101.3762       | 551.1917        | 367.7969        | 10 | G      | 5  | <b>602.3620</b> | <b>301.6847</b> | 201.4589        |
|         | 1230.4188       | 615.7130        | <b>410.8111</b> | 11 | E      | 4  | 545.3406        | 273.1739        | 182.4517        |
|         | 1343.5028       | 672.2551        | 448.5058        | 12 | I      | 3  | <b>416.2980</b> | 208.6526        | 139.4375        |
|         | 1471.5978       | 736.3025        | 491.2041        | 13 | K      | 2  | <b>303.2139</b> | 152.1106        | 101.7428        |
|         |                 |                 |                 | 14 | R      | 1  | <b>175.1190</b> | 88.0631         | 59.0445         |

# Annotated spectra from Saleem et. al. 2009

R.S<sub>167</sub>PHLEDLTSR.K/2

0.9952

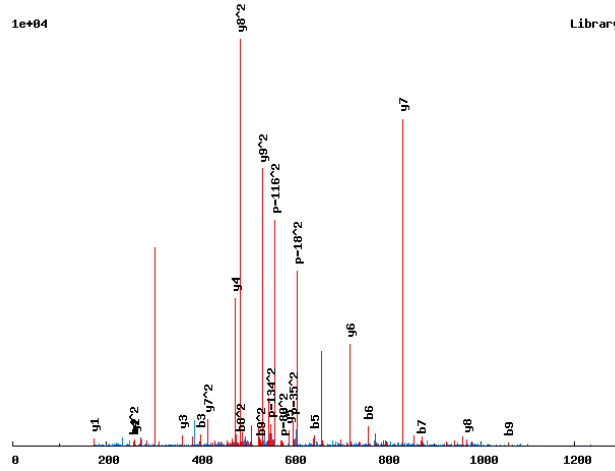

| Library | b <sup>1+</sup> | b <sup>2+</sup> | #  | AA     | #  | y <sup>1+</sup> | y <sup>2+</sup> |
|---------|-----------------|-----------------|----|--------|----|-----------------|-----------------|
|         | 168.0056        | 84.5065         | 1  | S[167] | 10 |                 |                 |
|         | 265.0584        | 133.0328        | 2  | P      | 9  | 1067.5480       | 534.2776        |
|         | 402.1173        | 201.5623        | 3  | H      | 8  | 970.4952        | 485.7513        |
|         | 515.2014        | 258.1043        | 4  | L      | 7  | 833.4363        | 417.2218        |
|         | 644.2440        | 322.6256        | 5  | E      | 6  | 720.3523        | 360.6798        |
|         | 759.2709        | 380.1391        | 6  | D      | 5  | 591.3097        | 296.1585        |
|         | 872.3550        | 436.6811        | 7  | L      | 4  | 476.2827        | 238.6450        |
|         | 973.4026        | 487.2050        | 8  | T      | 3  | 363.1987        | 182.1030        |
|         | 1060.4347       | 530.7210        | 9  | S      | 2  | 262.1510        | 131.5791        |
|         |                 |                 | 10 | R      | 1  | 175.1190        | 88.0631         |

# Annotated spectra from Saleem et. al. 2009

R.SPS<sub>167</sub>LNK<sub>136</sub>S<sub>167</sub>GAFGR<sub>166</sub>S/2

0.8488

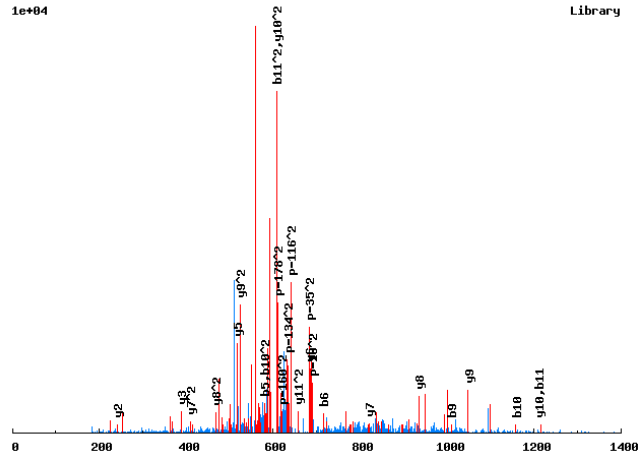

| Library | b <sup>1+</sup> | b <sup>2+</sup> | #  | AA     | #  | y <sup>1+</sup> | y <sup>2+</sup> |
|---------|-----------------|-----------------|----|--------|----|-----------------|-----------------|
|         | 88.0393         | 44.5233         | 1  | S      | 12 |                 |                 |
|         | 185.0921        | 93.0497         | 2  | P      | 11 | 1311.5613       | 656.2843        |
|         | 352.0904        | 176.5489        | 3  | S[167] | 10 | 1214.5085       | 607.7579        |
|         | 465.1745        | 233.0909        | 4  | L      | 9  | 1047.5102       | 524.2587        |
|         | 579.2174        | 290.1124        | 5  | N      | 8  | 934.4261        | 467.7167        |
|         | 715.3266        | 358.1669        | 6  | K[136] | 7  | 820.3832        | 410.6952        |
|         | 882.3249        | 441.6661        | 7  | S[167] | 6  | 684.2740        | 342.6407        |
|         | 939.3464        | 470.1768        | 8  | G      | 5  | 517.2757        | 259.1415        |
|         | 1010.3835       | 505.6954        | 9  | A      | 4  | 460.2542        | 230.6307        |
|         | 1157.4519       | 579.2296        | 10 | F      | 3  | 389.2171        | 195.1122        |
|         | 1214.4734       | 607.7403        | 11 | G      | 2  | 242.1487        | 121.5780        |
|         |                 |                 | 12 | R[166] | 1  | 185.1272        | 93.0672         |

# Annotated spectra from Saleem et. al. 2009

K.SPS<sub>167</sub>RY<sub>243</sub>SLSR.R/2

0.643

1e+04

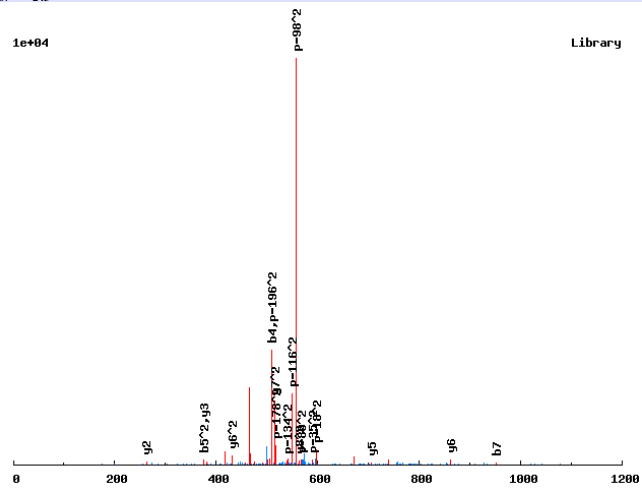

| Library | b <sup>1+</sup> | b <sup>2+</sup> | # | AA     | # | y <sup>1+</sup> | y <sup>2+</sup> |
|---------|-----------------|-----------------|---|--------|---|-----------------|-----------------|
|         | 88.0393         | 44.5233         | 1 | S      | 9 |                 |                 |
|         | 185.0921        | 93.0497         | 2 | P      | 8 | 1125.4490       | 563.2281        |
|         | 352.0904        | 176.5489        | 3 | S[167] | 7 | 1028.3962       | 514.7017        |
|         | 508.1915        | 254.5994        | 4 | R      | 6 | 861.3978        | 431.2026        |
|         | 751.2212        | 376.1142        | 5 | Y[243] | 5 | 705.2967        | 353.1520        |
|         | 838.2532        | 419.6303        | 6 | S      | 4 | 462.2671        | 231.6372        |
|         | 951.3373        | 476.1723        | 7 | L      | 3 | 375.2350        | 188.1212        |
|         | 1038.3693       | 519.6883        | 8 | S      | 2 | 262.1510        | 131.5791        |
|         |                 |                 | 9 | R      | 1 | 175.1190        | 88.0631         |









# Annotated spectra from Saleem et. al. 2009

K.SQNAPS<sub>167</sub>DGTGS<sub>167</sub>ST<sub>181</sub>PQHHEDEDELSR.Q/3

0.9998

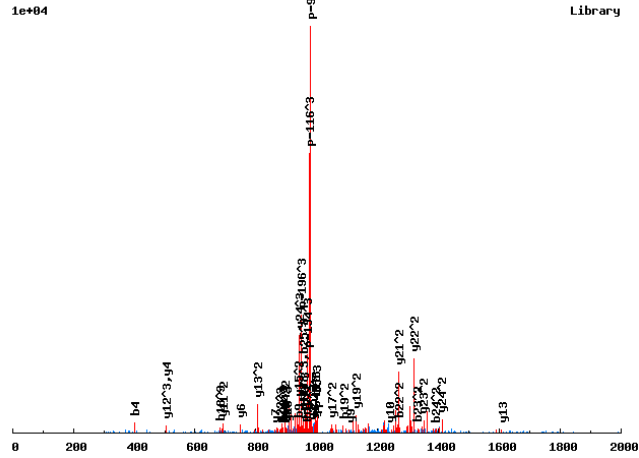

| Library | b <sup>1+</sup> | b <sup>2+</sup> | b <sup>3+</sup> | #  | AA     | #  | y <sup>1+</sup> | y <sup>2+</sup> | y <sup>3+</sup> |
|---------|-----------------|-----------------|-----------------|----|--------|----|-----------------|-----------------|-----------------|
|         | 88.0393         | 44.5233         | 30.0180         | 1  | S      | 26 |                 |                 |                 |
|         | 216.0979        | 108.5526        | 72.7042         | 2  | Q      | 25 | 2949.0245       | 1475.0159       | 983.6797        |
|         | 330.1408        | 165.5740        | 110.7185        | 3  | N      | 24 | 2820.9659       | 1410.9866       | 940.9935        |
|         | 401.1779        | 201.0926        | 134.3975        | 4  | A      | 23 | 2706.9230       | 1353.9651       | 902.9792        |
|         | 498.2307        | 249.6190        | 166.7484        | 5  | P      | 22 | 2635.8859       | 1318.4466       | 879.3001        |
|         | 665.2291        | 333.1182        | 222.4145        | 6  | S[167] | 21 | 2538.8331       | 1269.9202       | 846.9492        |
|         | 780.2560        | 390.6316        | 260.7569        | 7  | D      | 20 | 2371.8347       | 1186.4210       | 791.2831        |
|         | 837.2775        | 419.1424        | 279.7640        | 8  | G      | 19 | 2256.8078       | 1128.9075       | 752.9408        |
|         | 938.3251        | 469.6662        | 313.4466        | 9  | T      | 18 | 2199.7863       | 1100.3968       | 733.9336        |
|         | 995.3466        | 498.1769        | 332.4537        | 10 | G      | 17 | 2098.7387       | 1049.8730       | 700.2511        |
|         | 1162.3450       | 581.6761        | 388.1198        | 11 | S[167] | 16 | 2041.7172       | 1021.3622       | 681.2439        |
|         | 1249.3770       | 625.1921        | 417.1305        | 12 | S      | 15 | 1874.7188       | 937.8631        | 625.5778        |
|         | 1430.3910       | 715.6991        | 477.4685        | 13 | T[181] | 14 | 1787.6868       | 894.3470        | 596.5671        |
|         | 1527.4438       | 764.2255        | 509.8194        | 14 | P      | 13 | 1606.6728       | 803.8400        | 536.2291        |
|         | 1655.5023       | 828.2548        | 552.5056        | 15 | Q      | 12 | 1509.6200       | 755.3137        | 503.8782        |
|         | 1792.5612       | 896.7843        | 598.1919        | 16 | H      | 11 | 1381.5615       | 691.2844        | 461.1920        |
|         | 1929.6202       | 965.3137        | 643.8782        | 17 | H      | 10 | 1244.5025       | 622.7549        | 415.5057        |
|         | 2044.6471       | 1022.8272       | 682.2206        | 18 | D      | 9  | 1107.4436       | 554.2255        | 369.8194        |
|         | 2173.6897       | 1087.3485       | 725.2347        | 19 | E      | 8  | 992.4167        | 496.7120        | 331.4771        |
|         | 2288.7166       | 1144.8620       | 763.5771        | 20 | D      | 7  | 863.3741        | 432.1907        | 288.4629        |
|         | 2417.7592       | 1209.3832       | 806.5913        | 21 | E      | 6  | 748.3472        | 374.6772        | 250.1206        |
|         | 2532.7862       | 1266.8967       | 844.9336        | 22 | D      | 5  | 619.3046        | 310.1559        | 207.1064        |
|         | 2661.8287       | 1331.4180       | 887.9478        | 23 | E      | 4  | 504.2776        | 252.6425        | 168.7641        |
|         | 2774.9128       | 1387.9600       | 925.6425        | 24 | L      | 3  | 375.2350        | 188.1212        | 125.7499        |
|         | 2861.9448       | 1431.4761       | 954.6531        | 25 | S      | 2  | 262.1510        | 131.5791        | 88.0552         |
|         |                 |                 |                 | 26 | R      | 1  | 175.1190        | 88.0631         | 59.0445         |

# Annotated spectra from Saleem et. al. 2009

R.SQQLSHVTSTGS<sub>16</sub>SS<sub>16</sub>SM<sub>17</sub>ER.L/3

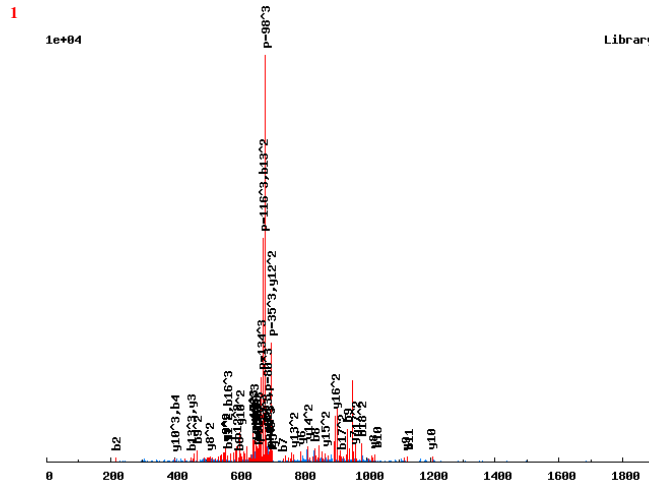

| Library | b <sup>1+</sup>  | b <sup>2+</sup> | b <sup>3+</sup> | #  | AA     | #  | y <sup>1+</sup>  | y <sup>2+</sup> | y <sup>3+</sup> |
|---------|------------------|-----------------|-----------------|----|--------|----|------------------|-----------------|-----------------|
|         | 88.0393          | 44.5233         | 30.0180         | 1  | S      | 19 |                  |                 |                 |
|         | <b>216.0979</b>  | 108.5526        | 72.7042         | 2  | Q      | 18 | 2054.7886        | 1027.8979       | <b>685.6011</b> |
|         | 344.1565         | 172.5819        | 115.3903        | 3  | Q      | 17 | 1926.7300        | <b>963.8687</b> | <b>642.9149</b> |
|         | <b>401.1779</b>  | 201.0926        | 134.3975        | 4  | G      | 16 | 1798.6714        | <b>899.8394</b> | 600.2287        |
|         | 514.2620         | 257.6346        | 172.0922        | 5  | L      | 15 | 1741.6500        | <b>871.3286</b> | 581.2215        |
|         | <b>601.2940</b>  | 301.1507        | 201.1029        | 6  | S      | 14 | 1628.5659        | <b>814.7866</b> | 543.5268        |
|         | <b>738.3529</b>  | 369.6801        | 246.7892        | 7  | H      | 13 | 1541.5339        | <b>771.2706</b> | 514.5162        |
|         | <b>837.4213</b>  | 419.2143        | 279.8120        | 8  | V      | 12 | 1404.4750        | <b>702.7411</b> | 468.8298        |
|         | <b>938.4690</b>  | <b>469.7382</b> | 313.4945        | 9  | T      | 11 | 1305.4066        | <b>653.2069</b> | 435.8070        |
|         | <b>1025.5011</b> | 513.2542        | 342.5052        | 10 | S      | 10 | <b>1204.3589</b> | <b>602.6831</b> | <b>402.1245</b> |
|         | <b>1126.5487</b> | <b>563.7780</b> | 376.1878        | 11 | T      | 9  | <b>1117.3269</b> | <b>559.1671</b> | 373.1138        |
|         | 1183.5702        | <b>592.2887</b> | 395.1949        | 12 | G      | 8  | <b>1016.2792</b> | <b>508.6432</b> | 339.4312        |
|         | 1350.5686        | <b>675.7879</b> | <b>450.8610</b> | 13 | S[167] | 7  | <b>959.2577</b>  | 480.1325        | 320.4241        |
|         | 1437.6006        | 719.3039        | 479.8717        | 14 | S      | 6  | <b>792.2594</b>  | 396.6333        | 264.7580        |
|         | 1604.5989        | 802.8031        | 535.5378        | 15 | S[167] | 5  | <b>705.2273</b>  | 353.1173        | 235.7473        |
|         | 1691.6310        | 846.3191        | <b>564.5485</b> | 16 | S      | 4  | 538.2290         | 269.6181        | 180.0812        |
|         | 1838.6664        | <b>919.8368</b> | 613.5603        | 17 | M[147] | 3  | <b>451.1969</b>  | 226.1021        | 151.0705        |
|         | 1967.7090        | <b>984.3581</b> | <b>656.5745</b> | 18 | E      | 2  | 304.1615         | 152.5844        | 102.0587        |
|         |                  |                 |                 | 19 | R      | 1  | 175.1190         | 88.0631         | 59.0445         |



# Annotated spectra from Saleem et. al. 2009

K.SQSL<sub>167</sub>-VLST<sub>181</sub>PK.K/2

0.7824

1e+04

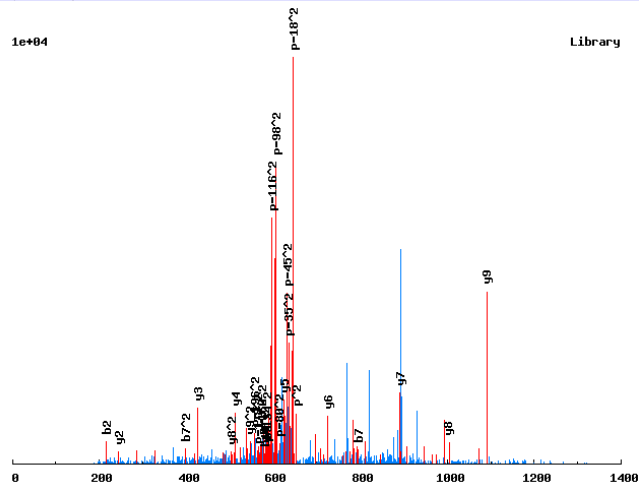

| Library | b <sup>1+</sup> | b <sup>2+</sup> | #  | AA     | #  | y <sup>1+</sup>  | y <sup>2+</sup> |
|---------|-----------------|-----------------|----|--------|----|------------------|-----------------|
|         | 88.0393         | 44.5233         | 1  | S      | 11 |                  |                 |
|         | <b>216.0979</b> | 108.5526        | 2  | Q      | 10 | 1219.5371        | 610.2722        |
|         | 303.1299        | 152.0686        | 3  | S      | 9  | <b>1091.4785</b> | <b>546.2429</b> |
|         | 416.2140        | 208.6106        | 4  | L      | 8  | <b>1004.4465</b> | <b>502.7269</b> |
|         | <b>583.2123</b> | 292.1098        | 5  | S[167] | 7  | <b>891.3624</b>  | 446.1849        |
|         | 682.2808        | 341.6440        | 6  | V      | 6  | <b>724.3641</b>  | 362.6857        |
|         | <b>795.3648</b> | <b>398.1860</b> | 7  | L      | 5  | <b>625.2957</b>  | 313.1515        |
|         | 882.3968        | 441.7021        | 8  | S      | 4  | <b>512.2116</b>  | 256.6094        |
|         | 1063.4109       | 532.2091        | 9  | T[181] | 3  | <b>425.1796</b>  | 213.0934        |
|         | 1160.4636       | <b>580.7354</b> | 10 | P      | 2  | <b>244.1656</b>  | 122.5864        |
|         |                 |                 | 11 | K      | 1  | 147.1128         | 74.0600         |





# Annotated spectra from Saleem et. al. 2009

R.S<sub>167</sub>QSPVS<sub>167</sub>FAPTQGR.S/2

0.9795

1e+04

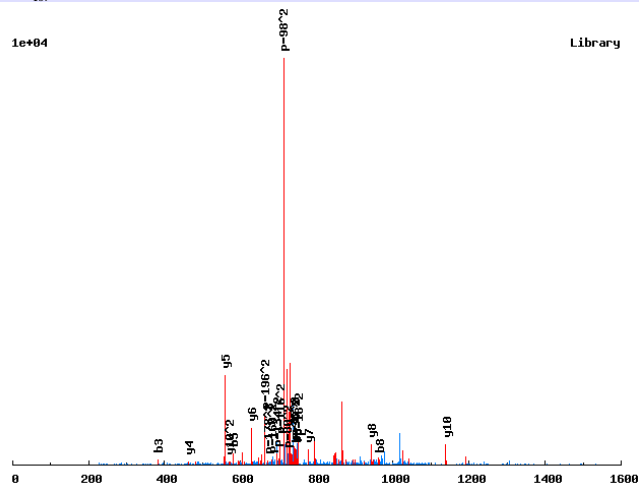

| Library | b <sup>1+</sup> | b <sup>2+</sup> | #  | AA     | #  | y <sup>1+</sup> | y <sup>2+</sup> |
|---------|-----------------|-----------------|----|--------|----|-----------------|-----------------|
|         | 168.0056        | 84.5065         | 1  | S[167] | 13 |                 |                 |
|         | 296.0642        | 148.5358        | 2  | Q      | 12 | 1354.6151       | 677.8112        |
|         | 383.0963        | 192.0518        | 3  | S      | 11 | 1226.5565       | 613.7819        |
|         | 480.1490        | 240.5781        | 4  | P      | 10 | 1139.5245       | 570.2659        |
|         | 579.2174        | 290.1124        | 5  | V      | 9  | 1042.4717       | 521.7395        |
|         | 746.2158        | 373.6115        | 6  | S[167] | 8  | 943.4033        | 472.2053        |
|         | 893.2842        | 447.1457        | 7  | F      | 7  | 776.4050        | 388.7061        |
|         | 964.3213        | 482.6643        | 8  | A      | 6  | 629.3365        | 315.1719        |
|         | 1061.3741       | 531.1907        | 9  | P      | 5  | 558.2994        | 279.6534        |
|         | 1162.4217       | 581.7145        | 10 | T      | 4  | 461.2467        | 231.1270        |
|         | 1290.4803       | 645.7438        | 11 | Q      | 3  | 360.1990        | 180.6031        |
|         | 1347.5018       | 674.2545        | 12 | G      | 2  | 232.1404        | 116.5738        |
|         |                 |                 | 13 | R      | 1  | 175.1190        | 88.0631         |



# Annotated spectra from Saleem et. al. 2009

K.SQTFKS<sub>167</sub>VES<sub>167</sub>FQSPQR.K/2

0.7331

1e+04

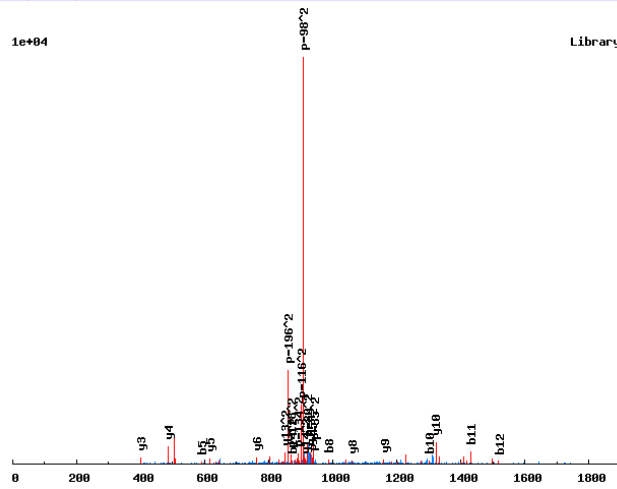

| Library | b <sup>1+</sup> | b <sup>2+</sup> | #  | AA     | #  | y <sup>1+</sup> | y <sup>2+</sup> |
|---------|-----------------|-----------------|----|--------|----|-----------------|-----------------|
|         | 88.0393         | 44.5233         | 1  | S      | 15 |                 |                 |
|         | 216.0979        | 108.5526        | 2  | Q      | 14 | 1828.7667       | 914.8870        |
|         | 317.1456        | 159.0764        | 3  | T      | 13 | 1700.7081       | 850.8577        |
|         | 464.2140        | 232.6106        | 4  | F      | 12 | 1599.6604       | 800.3338        |
|         | 592.3089        | 296.6581        | 5  | K      | 11 | 1452.5920       | 726.7996        |
|         | 759.3073        | 380.1573        | 6  | S[167] | 10 | 1324.4970       | 662.7522        |
|         | 858.3757        | 429.6915        | 7  | V      | 9  | 1157.4987       | 579.2530        |
|         | 987.4183        | 494.2128        | 8  | E      | 8  | 1058.4303       | 529.7188        |
|         | 1154.4167       | 577.7120        | 9  | S[167] | 7  | 929.3877        | 465.1975        |
|         | 1301.4851       | 651.2462        | 10 | F      | 6  | 762.3893        | 381.6983        |
|         | 1429.5437       | 715.2755        | 11 | Q      | 5  | 615.3209        | 308.1641        |
|         | 1516.5757       | 758.7915        | 12 | S      | 4  | 487.2623        | 244.1348        |
|         | 1613.6284       | 807.3179        | 13 | P      | 3  | 400.2303        | 200.6188        |
|         | 1741.6870       | 871.3472        | 14 | Q      | 2  | 303.1775        | 152.0924        |
|         |                 |                 | 15 | R      | 1  | 175.1190        | 88.0631         |

# Annotated spectra from Saleem et. al. 2009

R.SQYGS<sub>167</sub>GS<sub>167</sub>PIPTRH<sub>166</sub>S/2

0.7967

1e+04

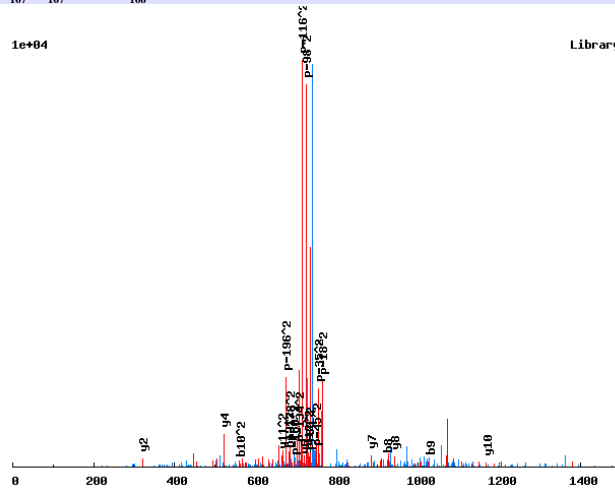

| Library | b <sup>1+</sup> | b <sup>2+</sup> | #  | AA     | #  | y <sup>1+</sup> | y <sup>2+</sup> |
|---------|-----------------|-----------------|----|--------|----|-----------------|-----------------|
|         | 88.0393         | 44.5233         | 1  | S      | 13 |                 |                 |
|         | 216.0979        | 108.5526        | 2  | Q      | 12 | 1457.5486       | 729.2779        |
|         | 379.1612        | 190.0842        | 3  | Y      | 11 | 1329.4900       | 665.2486        |
|         | 436.1827        | 218.5950        | 4  | G      | 10 | 1166.4267       | 583.7170        |
|         | 603.1810        | 302.0942        | 5  | S[167] | 9  | 1109.4052       | 555.2062        |
|         | 660.2025        | 330.6049        | 6  | G      | 8  | 942.4068        | 471.7071        |
|         | 827.2009        | 414.1041        | 7  | S[167] | 7  | 885.3854        | 443.1963        |
|         | 924.2536        | 462.6305        | 8  | P      | 6  | 718.3870        | 359.6971        |
|         | 1025.3013       | 513.1543        | 9  | T      | 5  | 621.3342        | 311.1708        |
|         | 1122.3541       | 561.6807        | 10 | P      | 4  | 520.2866        | 260.6469        |
|         | 1223.4017       | 612.2045        | 11 | T      | 3  | 423.2338        | 212.1205        |
|         | 1360.4607       | 680.7340        | 12 | H      | 2  | 322.1861        | 161.5967        |
|         |                 |                 | 13 | R[166] | 1  | 185.1272        | 93.0672         |

Annotated spectra from Saleem et. al. 2009

R.SQYGS<sub>167</sub>PIPT<sub>181</sub>HR<sub>166</sub>S<sub>167</sub>QLVQNK<sub>136</sub>H/3

0.9618

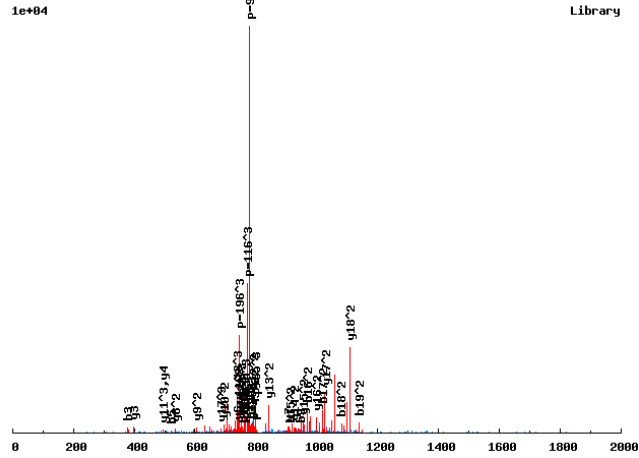

| Library | b <sup>1+</sup> | b <sup>2+</sup> | b <sup>3+</sup> | #  | AA     | #  | y <sup>1+</sup> | y <sup>2+</sup> | y <sup>3+</sup> |
|---------|-----------------|-----------------|-----------------|----|--------|----|-----------------|-----------------|-----------------|
|         | 88.0393         | 44.5233         | 30.0180         | 1  | S      | 20 |                 |                 |                 |
|         | 216.0979        | 108.5526        | 72.7042         | 2  | Q      | 19 | 2342.9686       | 1171.9880       | 781.6611        |
|         | 379.1612        | 190.0842        | 127.0586        | 3  | Y      | 18 | 2214.9101       | 1107.9587       | 738.9749        |
|         | 436.1827        | 218.5950        | 146.0657        | 4  | G      | 17 | 2051.8467       | 1026.4270       | 684.6204        |
|         | 523.2147        | 262.1110        | 175.0764        | 5  | S      | 16 | 1994.8253       | 997.9163        | 665.6133        |
|         | 580.2362        | 290.6217        | 194.0836        | 6  | G      | 15 | 1907.7932       | 954.4003        | 636.6026        |
|         | 747.2345        | 374.1209        | 249.7497        | 7  | S[167] | 14 | 1850.7718       | 925.8895        | 617.5954        |
|         | 844.2873        | 422.6473        | 282.1006        | 8  | P      | 13 | 1683.7734       | 842.3903        | 561.9293        |
|         | 945.3350        | 473.1711        | 315.7832        | 9  | T      | 12 | 1586.7207       | 793.8640        | 529.5784        |
|         | 1042.3877       | 521.6975        | 348.1341        | 10 | P      | 11 | 1485.6730       | 743.3401        | 495.8958        |
|         | 1223.4017       | 612.2045        | 408.4721        | 11 | T[181] | 10 | 1388.6202       | 694.8137        | 463.5449        |
|         | 1360.4607       | 680.7340        | 454.1584        | 12 | H      | 9  | 1207.6062       | 604.3067        | 403.2069        |
|         | 1526.5700       | 763.7887        | 509.5282        | 13 | R[166] | 8  | 1070.5473       | 535.7773        | 357.5206        |
|         | 1693.5684       | 847.2878        | 565.1943        | 14 | S[167] | 7  | 904.4379        | 452.7226        | 302.1508        |
|         | 1821.6270       | 911.3171        | 607.8805        | 15 | Q      | 6  | 737.4396        | 369.2234        | 246.4847        |
|         | 1934.7110       | 967.8592        | 645.5752        | 16 | L      | 5  | 609.3810        | 305.1941        | 203.7985        |
|         | 2033.7794       | 1017.3934       | 678.5980        | 17 | V      | 4  | 496.2969        | 248.6521        | 166.1038        |
|         | 2161.8380       | 1081.4227       | 721.2842        | 18 | Q      | 3  | 397.2285        | 199.1179        | 133.0810        |
|         | 2275.8810       | 1138.4441       | 759.2985        | 19 | N      | 2  | 269.1699        | 135.0886        | 90.3948         |
|         |                 |                 |                 | 20 | K[136] | 1  | 155.1270        | 78.0671         | 52.3805         |

# Annotated spectra from Saleem et. al. 2009

R.SRGQS<sub>167</sub>S<sub>167</sub>VSLER.T/2

0.9776

1e+04

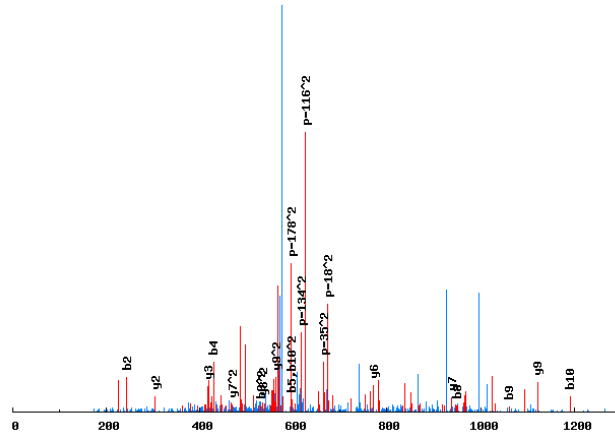

| Library | b <sup>1+</sup> | b <sup>2+</sup> | #  | AA     | #  | y <sup>1+</sup> | y <sup>2+</sup> |
|---------|-----------------|-----------------|----|--------|----|-----------------|-----------------|
|         | 88.0393         | 44.5233         | 1  | S      | 11 |                 |                 |
|         | 244.1404        | 122.5739        | 2  | R      | 10 | 1278.5239       | 639.7656        |
|         | 301.1619        | 151.0846        | 3  | G      | 9  | 1122.4228       | 561.7150        |
|         | 429.2205        | 215.1139        | 4  | Q      | 8  | 1065.4013       | 533.2043        |
|         | 596.2188        | 298.6131        | 5  | S[167] | 7  | 937.3428        | 469.1750        |
|         | 763.2172        | 382.1122        | 6  | S[167] | 6  | 770.3444        | 385.6758        |
|         | 862.2856        | 431.6464        | 7  | V      | 5  | 603.3460        | 302.1767        |
|         | 949.3176        | 475.1625        | 8  | S      | 4  | 504.2776        | 252.6425        |
|         | 1062.4017       | 531.7045        | 9  | L      | 3  | 417.2456        | 209.1264        |
|         | 1191.4443       | 596.2258        | 10 | E      | 2  | 304.1615        | 152.5844        |
|         |                 |                 | 11 | R      | 1  | 175.1190        | 88.0631         |

# Annotated spectra from Saleem et. al. 2009

K.SRIS<sub>167</sub>SAST<sub>181</sub>PQTS<sub>167</sub>QGRF/2

0.763

1e+04

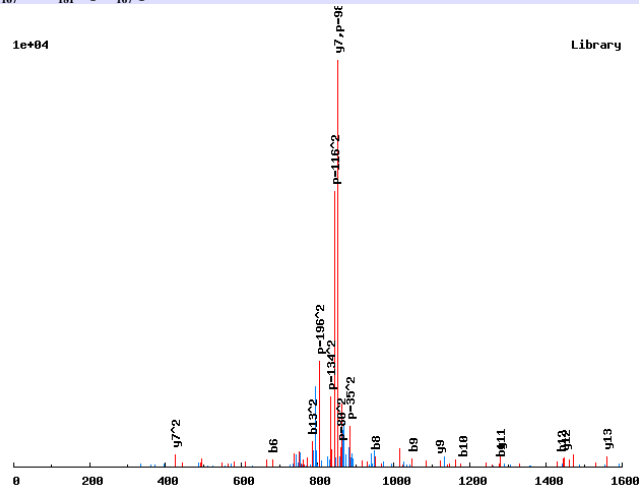

| Library | b <sup>1+</sup> | b <sup>2+</sup> | #  | AA      | #  | y <sup>1+</sup> | y <sup>2+</sup> |
|---------|-----------------|-----------------|----|---------|----|-----------------|-----------------|
|         | 88.0393         | 44.5233         | 1  | S       | 15 |                 |                 |
|         | 244.1404        | 122.5739        | 2  | R       | 14 | 1715.6551       | 858.3312        |
|         | 357.2245        | 179.1159        | 3  | I       | 13 | 1559.5540       | 780.2806        |
|         | 524.2228        | 262.6151        | 4  | S [167] | 12 | 1446.4699       | 723.7386        |
|         | 611.2549        | 306.1311        | 5  | S       | 11 | 1279.4716       | 640.2394        |
|         | 682.2920        | 341.6496        | 6  | A       | 10 | 1192.4395       | 596.7234        |
|         | 769.3240        | 385.1656        | 7  | S       | 9  | 1121.4024       | 561.2048        |
|         | 950.3380        | 475.6727        | 8  | T [181] | 8  | 1034.3704       | 517.6888        |
|         | 1047.3908       | 524.1990        | 9  | P       | 7  | 853.3564        | 427.1818        |
|         | 1175.4494       | 588.2283        | 10 | Q       | 6  | 756.3036        | 378.6554        |
|         | 1276.4970       | 638.7522        | 11 | T       | 5  | 628.2450        | 314.6262        |
|         | 1443.4954       | 722.2513        | 12 | S [167] | 4  | 527.1974        | 264.1023        |
|         | 1571.5540       | 786.2806        | 13 | Q       | 3  | 360.1990        | 180.6031        |
|         | 1628.5754       | 814.7914        | 14 | G       | 2  | 232.1404        | 116.5738        |
|         |                 |                 | 15 | R       | 1  | 175.1190        | 88.0631         |



# Annotated spectra from Saleem et. al. 2009

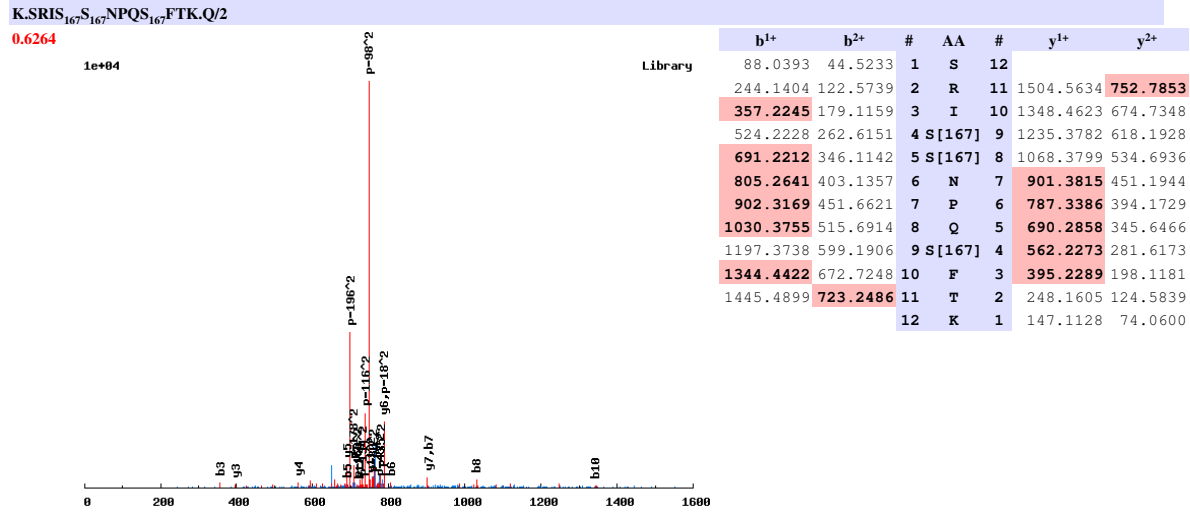

# Annotated spectra from Saleem et. al. 2009

K.SRQS<sub>167</sub>TSS<sub>167</sub>VATPATNR.S/2

0.9044

1e+04

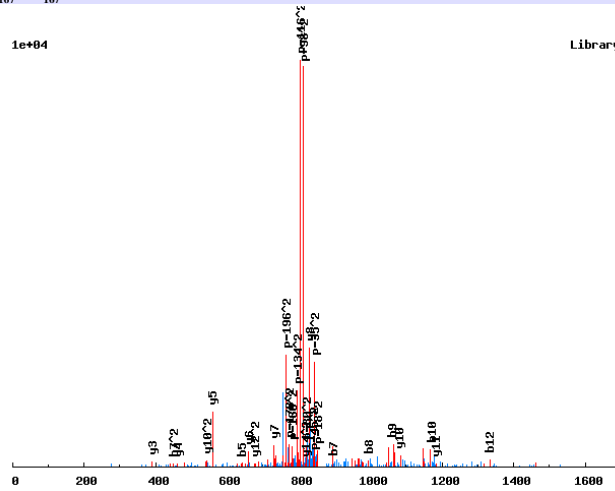

| Library | b <sup>1+</sup> | b <sup>2+</sup> | #  | AA     | #  | y <sup>1+</sup> | y <sup>2+</sup> |
|---------|-----------------|-----------------|----|--------|----|-----------------|-----------------|
|         | 88.0393         | 44.5233         | 1  | S      | 15 |                 |                 |
|         | 244.1404        | 122.5739        | 2  | R      | 14 | 1635.6888       | 818.3480        |
|         | 372.1990        | 186.6031        | 3  | Q      | 13 | 1479.5876       | 740.2975        |
|         | 539.1974        | 270.1023        | 4  | S[167] | 12 | 1351.5291       | 676.2682        |
|         | 640.2450        | 320.6262        | 5  | T      | 11 | 1184.5307       | 592.7690        |
|         | 727.2771        | 364.1422        | 6  | S      | 10 | 1083.4830       | 542.2452        |
|         | 894.2754        | 447.6414        | 7  | S[167] | 9  | 996.4510        | 498.7291        |
|         | 993.3438        | 497.1756        | 8  | V      | 8  | 829.4526        | 415.2300        |
|         | 1064.3810       | 532.6941        | 9  | A      | 7  | 730.3842        | 365.6958        |
|         | 1165.4286       | 583.2180        | 10 | T      | 6  | 659.3471        | 330.1772        |
|         | 1262.4814       | 631.7443        | 11 | P      | 5  | 558.2994        | 279.6534        |
|         | 1333.5185       | 667.2629        | 12 | A      | 4  | 461.2467        | 231.1270        |
|         | 1434.5662       | 717.7867        | 13 | T      | 3  | 390.2096        | 195.6084        |
|         | 1548.6091       | 774.8082        | 14 | N      | 2  | 289.1619        | 145.0846        |
|         |                 |                 | 15 | R      | 1  | 175.1190        | 88.0631         |



# Annotated spectra from Saleem et. al. 2009

K<sub>167</sub>R<sub>166</sub>R<sub>166</sub>SS<sub>167</sub>DADELDPMSPPSK<sub>136</sub>K/3

0.7323

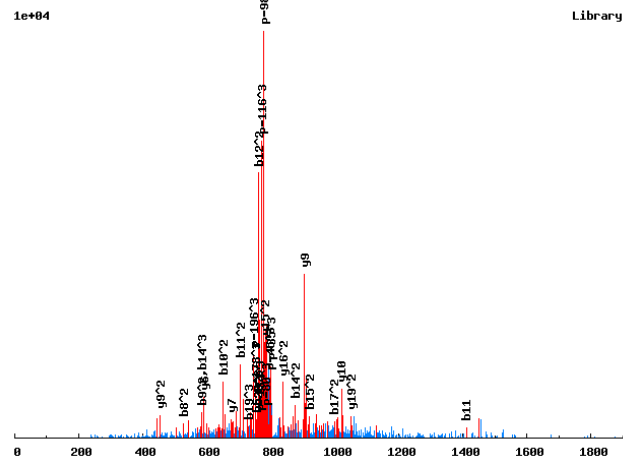

| Library | b <sup>1+</sup> | b <sup>2+</sup> | b <sup>3+</sup> | #  | AA | #        | y <sup>1+</sup> | y <sup>2+</sup> | y <sup>3+</sup> |
|---------|-----------------|-----------------|-----------------|----|----|----------|-----------------|-----------------|-----------------|
|         | 168.0056        | 84.5065         | 56.6734         | 1  | S  | [167] 21 |                 |                 |                 |
|         | 334.1150        | 167.5611        | 112.0432        | 2  | R  | [166] 20 | 2263.0418       | 1132.0246       | 755.0188        |
|         | 500.2244        | 250.6158        | 167.4130        | 3  | R  | [166] 19 | 2096.9325       | 1048.9699       | 699.6490        |
|         | 587.2564        | 294.1319        | 196.4237        | 4  | S  | 18       | 1930.8231       | 965.9152        | 644.2792        |
|         | 754.2548        | 377.6310        | 252.0898        | 5  | S  | [167] 17 | 1843.7911       | 922.3992        | 615.2685        |
|         | 867.3388        | 434.1731        | 289.7845        | 6  | I  | 16       | 1676.7927       | 838.9000        | 559.6024        |
|         | 982.3658        | 491.6865        | 328.1268        | 7  | D  | 15       | 1563.7086       | 782.3580        | 521.9077        |
|         | 1053.4029       | 527.2051        | 351.8058        | 8  | A  | 14       | 1448.6817       | 724.8445        | 483.5654        |
|         | 1168.4298       | 584.7186        | 390.1481        | 9  | D  | 13       | 1377.6446       | 689.3259        | 459.8864        |
|         | 1297.4724       | 649.2399        | 433.1623        | 10 | E  | 12       | 1262.6176       | 631.8125        | 421.5441        |
|         | 1410.5565       | 705.7819        | 470.8570        | 11 | L  | 11       | 1133.5750       | 567.2912        | 378.5299        |
|         | 1525.5834       | 763.2954        | 509.1993        | 12 | D  | 10       | 1020.4910       | 510.7491        | 340.8352        |
|         | 1622.6362       | 811.8217        | 541.5503        | 13 | P  | 9        | 905.4640        | 453.2357        | 302.4929        |
|         | 1753.6767       | 877.3420        | 585.2304        | 14 | M  | 8        | 808.4113        | 404.7093        | 270.1419        |
|         | 1840.7087       | 920.8580        | 614.2411        | 15 | S  | 7        | 677.3708        | 339.1890        | 226.4618        |
|         | 1937.7615       | 969.3844        | 646.5920        | 16 | P  | 6        | 590.3388        | 295.6730        | 197.4511        |
|         | 1994.7829       | 997.8951        | 665.5992        | 17 | G  | 5        | 493.2860        | 247.1466        | 165.1002        |
|         | 2091.8357       | 1046.4215       | 697.9501        | 18 | P  | 4        | 436.2645        | 218.6359        | 146.0930        |
|         | 2188.8884       | 1094.9479       | 730.3010        | 19 | P  | 3        | 339.2118        | 170.1095        | 113.7421        |
|         | 2275.9205       | 1138.4639       | 759.3117        | 20 | S  | 2        | 242.1590        | 121.5832        | 81.3912         |
|         |                 |                 |                 | 21 | K  | [136] 1  | 155.1270        | 78.0671         | 52.3805         |

# Annotated spectra from Saleem et. al. 2009

R.S<sub>167</sub>RS<sub>167</sub>AINIETESR.N/2

0.992

1e+04

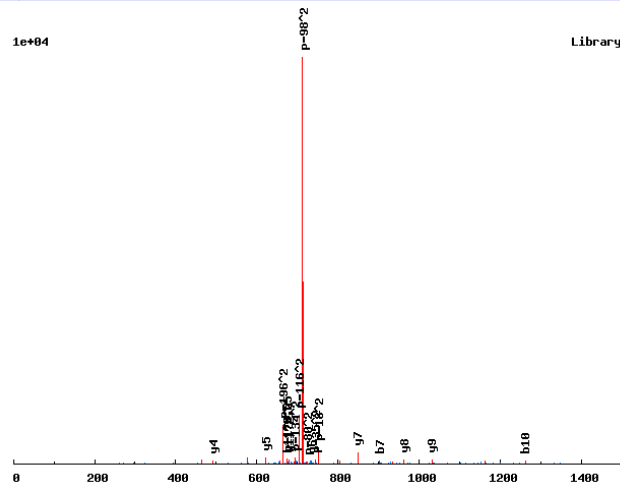

| Library | b <sup>1+</sup> | b <sup>2+</sup> | #  | AA      | #  | y <sup>1+</sup> | y <sup>2+</sup> |
|---------|-----------------|-----------------|----|---------|----|-----------------|-----------------|
|         | 168.0056        | 84.5065         | 1  | S [167] | 12 |                 |                 |
|         | 324.1068        | 162.5570        | 2  | R       | 11 | 1355.6315       | 678.3194        |
|         | 491.1051        | 246.0562        | 3  | S [167] | 10 | 1199.5304       | 600.2688        |
|         | 562.1422        | 281.5748        | 4  | A       | 9  | 1032.5320       | 516.7696        |
|         | 675.2263        | 338.1168        | 5  | I       | 8  | 961.4949        | 481.2511        |
|         | 789.2692        | 395.1382        | 6  | N       | 7  | 848.4108        | 424.7091        |
|         | 902.3533        | 451.6803        | 7  | I       | 6  | 734.3679        | 367.6876        |
|         | 1031.3959       | 516.2016        | 8  | E       | 5  | 621.2838        | 311.1456        |
|         | 1132.4435       | 566.7254        | 9  | T       | 4  | 492.2412        | 246.6243        |
|         | 1261.4861       | 631.2467        | 10 | E       | 3  | 391.1936        | 196.1004        |
|         | 1348.5182       | 674.7627        | 11 | S       | 2  | 262.1510        | 131.5791        |
|         |                 |                 | 12 | R       | 1  | 175.1190        | 88.0631         |

# Annotated spectra from Saleem et. al. 2009

R.SRS<sub>167</sub>ES<sub>167</sub>PM<sub>147</sub>FR.S/2

0.9273

1e+04

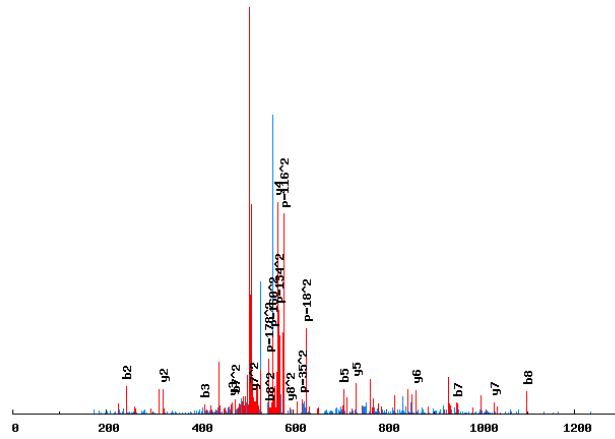

| Library | b <sup>1+</sup> | b <sup>2+</sup> | # | AA     | # | y <sup>1+</sup> | y <sup>2+</sup> |
|---------|-----------------|-----------------|---|--------|---|-----------------|-----------------|
|         | 88.0393         | 44.5233         | 1 | S      | 9 |                 |                 |
|         | 244.1404        | 122.5739        | 2 | R      | 8 | 1185.4159       | 593.2116        |
|         | 411.1388        | 206.0730        | 3 | S[167] | 7 | 1029.3148       | 515.1611        |
|         | 540.1814        | 270.5943        | 4 | E      | 6 | 862.3165        | 431.6619        |
|         | 707.1797        | 354.0935        | 5 | S[167] | 5 | 733.2739        | 367.1406        |
|         | 804.2325        | 402.6199        | 6 | P      | 4 | 566.2755        | 283.6414        |
|         | 951.2679        | 476.1376        | 7 | M[147] | 3 | 469.2228        | 235.1150        |
|         | 1098.3363       | 549.6718        | 8 | F      | 2 | 322.1874        | 161.5973        |
|         |                 |                 | 9 | R      | 1 | 175.1190        | 88.0631         |

# Annotated spectra from Saleem et. al. 2009

K.SRS<sub>167</sub>IEEKDTLEGTESSK.K/3

0.9995

1e+04

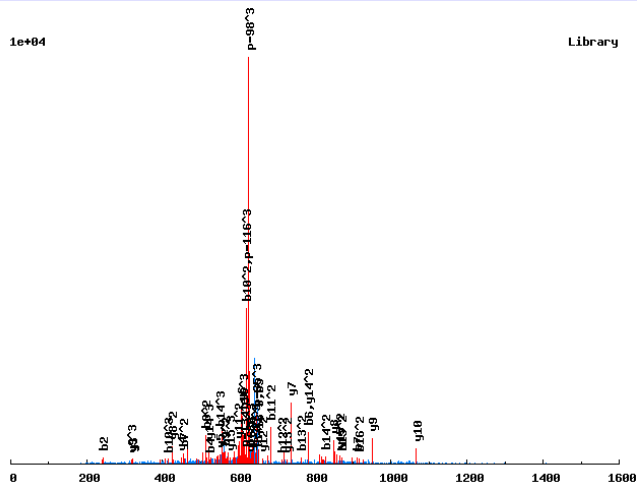

| Library | b <sup>1+</sup> | b <sup>2+</sup> | b <sup>3+</sup> | #  | AA     | #  | y <sup>1+</sup>  | y <sup>2+</sup> | y <sup>3+</sup> |
|---------|-----------------|-----------------|-----------------|----|--------|----|------------------|-----------------|-----------------|
|         | 88.0393         | 44.5233         | 30.0180         | 1  | S      | 17 |                  |                 |                 |
|         | <b>244.1404</b> | 122.5739        | 82.0517         | 2  | R      | 16 | 1888.8535        | 944.9304        | <b>630.2894</b> |
|         | 411.1388        | 206.0730        | 137.7178        | 3  | S[167] | 15 | 1732.7524        | <b>866.8799</b> | <b>578.2557</b> |
|         | <b>524.2228</b> | 262.6151        | 175.4125        | 4  | I      | 14 | 1565.7541        | <b>783.3807</b> | <b>522.5895</b> |
|         | <b>653.2654</b> | 327.1364        | 218.4267        | 5  | E      | 13 | 1452.6700        | <b>726.8386</b> | 484.8949        |
|         | <b>782.3080</b> | 391.6577        | 261.4409        | 6  | E      | 12 | 1323.6274        | <b>662.3173</b> | 441.8807        |
|         | <b>910.4030</b> | <b>455.7051</b> | 304.1392        | 7  | K      | 11 | 1194.5848        | <b>597.7961</b> | 398.8665        |
|         | 1025.4299       | <b>513.2186</b> | 342.4815        | 8  | D      | 10 | <b>1066.4899</b> | 533.7486        | 356.1681        |
|         | 1126.4776       | <b>563.7424</b> | 376.1641        | 9  | T      | 9  | <b>951.4629</b>  | 476.2351        | <b>317.8258</b> |
|         | 1239.5617       | <b>620.2845</b> | <b>413.8587</b> | 10 | L      | 8  | <b>850.4152</b>  | <b>425.7113</b> | 284.1433        |
|         | 1368.6043       | <b>684.8058</b> | 456.8729        | 11 | E      | 7  | <b>737.3312</b>  | 369.1692        | 246.4486        |
|         | 1425.6257       | <b>713.3165</b> | 475.8801        | 12 | G      | 6  | <b>608.2886</b>  | 304.6479        | 203.4344        |
|         | 1526.6734       | <b>763.8403</b> | 509.5627        | 13 | T      | 5  | <b>551.2671</b>  | 276.1372        | 184.4272        |
|         | 1655.7160       | <b>828.3616</b> | <b>552.5768</b> | 14 | E      | 4  | <b>450.2194</b>  | 225.6134        | 150.7447        |
|         | 1742.7480       | <b>871.8776</b> | 581.5875        | 15 | S      | 3  | <b>321.1769</b>  | 161.0921        | 107.7305        |
|         | 1829.7800       | <b>915.3937</b> | <b>610.5982</b> | 16 | S      | 2  | 234.1448         | 117.5761        | 78.7198         |
|         |                 |                 |                 | 17 | K      | 1  | 147.1128         | 74.0600         | 49.7091         |

# Annotated spectra from Saleem et. al. 2009

R.SR<sub>166</sub>S<sub>167</sub>LTVAELNEEK<sub>136</sub>R/2

0.9648

1e+04

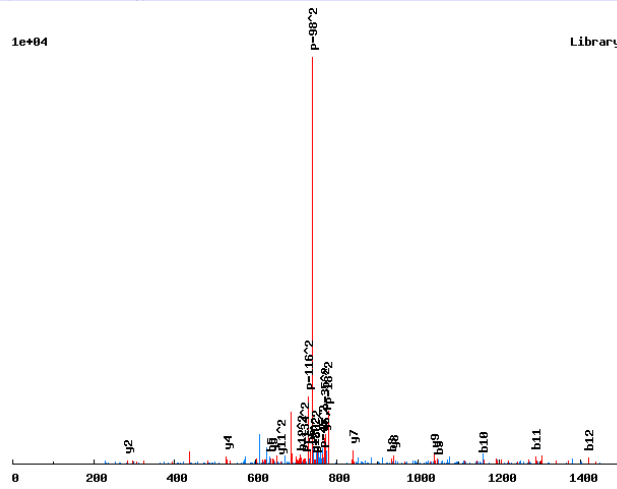

| Library | b <sup>1+</sup> | b <sup>2+</sup> | #  | AA     | #  | y <sup>1+</sup> | y <sup>2+</sup> |
|---------|-----------------|-----------------|----|--------|----|-----------------|-----------------|
|         | 88.0393         | 44.5233         | 1  | S      | 13 |                 |                 |
|         | 254.1487        | 127.5780        | 2  | R[166] | 12 | 1486.7268       | 743.8670        |
|         | 421.1470        | 211.0772        | 3  | S[167] | 11 | 1320.6174       | 660.8123        |
|         | 534.2311        | 267.6192        | 4  | L      | 10 | 1153.6190       | 577.3131        |
|         | 635.2788        | 318.1430        | 5  | T      | 9  | 1040.5350       | 520.7711        |
|         | 734.3472        | 367.6772        | 6  | V      | 8  | 939.4873        | 470.2473        |
|         | 805.3843        | 403.1958        | 7  | A      | 7  | 840.4189        | 420.7131        |
|         | 934.4269        | 467.7171        | 8  | E      | 6  | 769.3818        | 385.1945        |
|         | 1047.5110       | 524.2591        | 9  | L      | 5  | 640.3392        | 320.6732        |
|         | 1161.5539       | 581.2806        | 10 | N      | 4  | 527.2551        | 264.1312        |
|         | 1290.5965       | 645.8019        | 11 | E      | 3  | 413.2122        | 207.1097        |
|         | 1419.6391       | 710.3232        | 12 | E      | 2  | 284.1696        | 142.5884        |
|         |                 |                 | 13 | K[136] | 1  | 155.1270        | 78.0671         |

# Annotated spectra from Saleem et. al. 2009

R.SRS<sub>167</sub>PFTVETR.K/3

0.7298

1e+04

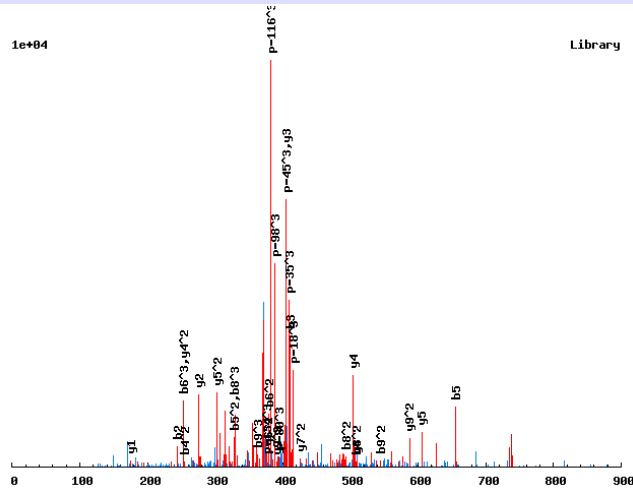

| Library | b <sup>1+</sup> | b <sup>2+</sup> | b <sup>3+</sup> | #  | AA     | #  | y <sup>1+</sup> | y <sup>2+</sup> | y <sup>3+</sup> |
|---------|-----------------|-----------------|-----------------|----|--------|----|-----------------|-----------------|-----------------|
|         | 88.0393         | 44.5233         | 30.0180         | 1  | S      | 10 |                 |                 |                 |
|         | <b>244.1404</b> | 122.5739        | 82.0517         | 2  | R      | 9  | 1172.5460       | <b>586.7766</b> | <b>391.5202</b> |
|         | <b>411.1388</b> | 206.0730        | 137.7178        | 3  | S[167] | 8  | 1016.4448       | <b>508.7261</b> | 339.4865        |
|         | <b>508.1915</b> | <b>254.5994</b> | 170.0687        | 4  | P      | 7  | 849.4465        | <b>425.2269</b> | 283.8203        |
|         | <b>655.2600</b> | <b>328.1336</b> | 219.0915        | 5  | F      | 6  | 752.3937        | <b>376.7005</b> | 251.4694        |
|         | 756.3076        | <b>378.6575</b> | <b>252.7741</b> | 6  | T      | 5  | <b>605.3253</b> | <b>303.1663</b> | 202.4466        |
|         | 855.3760        | 428.1917        | 285.7969        | 7  | V      | 4  | <b>504.2776</b> | <b>252.6425</b> | 168.7641        |
|         | 984.4186        | <b>492.7130</b> | <b>328.8111</b> | 8  | E      | 3  | <b>405.2092</b> | 203.1082        | 135.7413        |
|         | 1085.4663       | <b>543.2368</b> | <b>362.4936</b> | 9  | T      | 2  | <b>276.1666</b> | 138.5870        | 92.7271         |
|         |                 |                 |                 | 10 | R      | 1  | <b>175.1190</b> | 88.0631         | 59.0445         |

# Annotated spectra from Saleem et. al. 2009

R.SR<sub>166</sub>S<sub>167</sub>S<sub>167</sub>VMFK<sub>136</sub>S/2

0.8718

1e+04

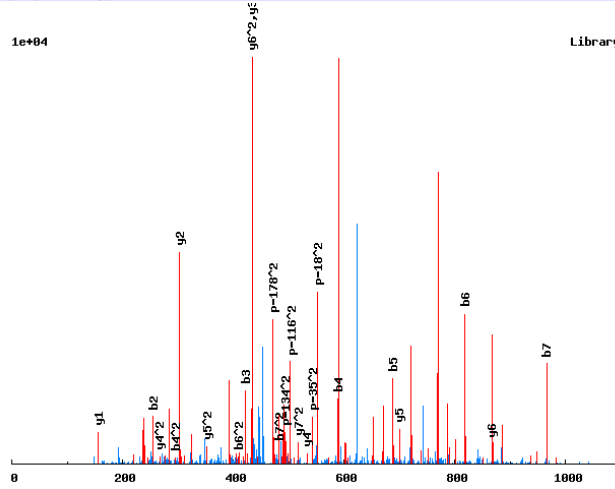

| Library | b <sup>1+</sup> | b <sup>2+</sup> | # | AA     | # | y <sup>1+</sup> | y <sup>2+</sup> |
|---------|-----------------|-----------------|---|--------|---|-----------------|-----------------|
|         | 88.0393         | 44.5233         | 1 | S      | 8 |                 |                 |
|         | 254.1487        | 127.5780        | 2 | R[166] | 7 | 1032.4104       | 516.7088        |
|         | 421.1470        | 211.0772        | 3 | S[167] | 6 | 866.3010        | 433.6542        |
|         | 588.1454        | 294.5763        | 4 | S[167] | 5 | 699.3027        | 350.1550        |
|         | 687.2138        | 344.1106        | 5 | V      | 4 | 532.3043        | 266.6558        |
|         | 818.2543        | 409.6308        | 6 | M      | 3 | 433.2359        | 217.1216        |
|         | 965.3227        | 483.1650        | 7 | F      | 2 | 302.1954        | 151.6013        |
|         |                 |                 | 8 | K[136] | 1 | 155.1270        | 78.0671         |

# Annotated spectra from Saleem et. al. 2009

R.SRS<sub>167</sub>TDDAVSLQDNNLALLEDHR.N/3

0.9979

1e+04

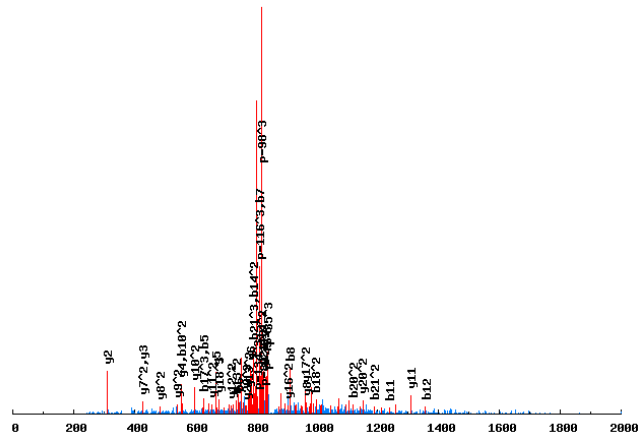

| Library | b <sup>1+</sup> | b <sup>2+</sup> | b <sup>3+</sup> | #  | AA     | #  | y <sup>1+</sup> | y <sup>2+</sup> | y <sup>3+</sup> |
|---------|-----------------|-----------------|-----------------|----|--------|----|-----------------|-----------------|-----------------|
|         | 88.0393         | 44.5233         | 30.0180         | 1  | S      | 22 |                 |                 |                 |
|         | 244.1404        | 122.5739        | 82.0517         | 2  | R      | 21 | 2462.1307       | 1231.5690       | 821.3818        |
|         | 411.1388        | 206.0730        | 137.7178        | 3  | S[167] | 20 | 2306.0296       | 1153.5184       | 769.3481        |
|         | 512.1865        | 256.5969        | 171.4003        | 4  | T      | 19 | 2139.0312       | 1070.0193       | 713.6819        |
|         | 627.2134        | 314.1103        | 209.7427        | 5  | D      | 18 | 2037.9835       | 1019.4954       | 679.9994        |
|         | 742.2403        | 371.6238        | 248.0850        | 6  | D      | 17 | 1922.9566       | 961.9819        | 641.6571        |
|         | 813.2775        | 407.1424        | 271.7640        | 7  | A      | 16 | 1807.9297       | 904.4685        | 603.3147        |
|         | 912.3459        | 456.6766        | 304.7868        | 8  | V      | 15 | 1736.8926       | 868.9499        | 579.6357        |
|         | 999.3779        | 500.1926        | 333.7975        | 9  | S      | 14 | 1637.8241       | 819.4157        | 546.6129        |
|         | 1112.4620       | 556.7346        | 371.4922        | 10 | L      | 13 | 1550.7921       | 775.8997        | 517.6022        |
|         | 1240.5205       | 620.7639        | 414.1784        | 11 | Q      | 12 | 1437.7081       | 719.3577        | 479.9075        |
|         | 1355.5475       | 678.2774        | 452.5207        | 12 | D      | 11 | 1309.6495       | 655.3284        | 437.2213        |
|         | 1469.5904       | 735.2988        | 490.5350        | 13 | N      | 10 | 1194.6225       | 597.8149        | 398.8790        |
|         | 1583.6333       | 792.3203        | 528.5493        | 14 | N      | 9  | 1080.5796       | 540.7934        | 360.8647        |
|         | 1696.7174       | 848.8623        | 566.2440        | 15 | L      | 8  | 966.5367        | 483.7720        | 322.8504        |
|         | 1767.7545       | 884.3809        | 589.9230        | 16 | A      | 7  | 853.4526        | 427.2300        | 285.1557        |
|         | 1880.8386       | 940.9229        | 627.6177        | 17 | L      | 6  | 782.4155        | 391.7114        | 261.4767        |
|         | 1993.9226       | 997.4650        | 665.3124        | 18 | L      | 5  | 669.3315        | 335.1694        | 223.7820        |
|         | 2122.9652       | 1061.9862       | 708.3266        | 19 | E      | 4  | 556.2474        | 278.6273        | 186.0873        |
|         | 2237.9922       | 1119.4997       | 746.6689        | 20 | D      | 3  | 427.2048        | 214.1060        | 143.0731        |
|         | 2375.0511       | 1188.0292       | 792.3552        | 21 | H      | 2  | 312.1779        | 156.5926        | 104.7308        |
|         |                 |                 |                 | 22 | R      | 1  | 175.1190        | 88.0631         | 59.0445         |



# Annotated spectra from Saleem et. al. 2009

RSR<sub>166</sub>S<sub>167</sub>TDDAVS<sub>167</sub>LQDNNLALLEDHR<sub>166</sub>N/3

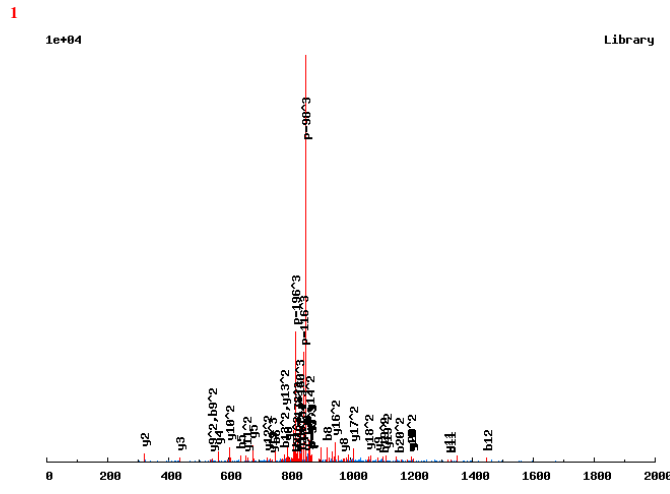

| Library | b <sup>1+</sup> | b <sup>2+</sup> | b <sup>3+</sup> | #  | AA     | #  | y <sup>1+</sup> | y <sup>2+</sup> | y <sup>3+</sup> |
|---------|-----------------|-----------------|-----------------|----|--------|----|-----------------|-----------------|-----------------|
|         | 88.0393         | 44.5233         | 30.0180         | 1  | S      | 22 |                 |                 |                 |
|         | 254.1487        | 127.5780        | 85.3877         | 2  | R[166] | 21 | 2562.1136       | 1281.5604       | 854.7094        |
|         | 421.1470        | 211.0772        | 141.0539        | 3  | S[167] | 20 | 2396.0042       | 1198.5057       | 799.3396        |
|         | 522.1947        | 261.6010        | 174.7364        | 4  | T      | 19 | 2229.0058       | 1115.0066       | 743.6735        |
|         | 637.2217        | 319.1145        | 213.0787        | 5  | D      | 18 | 2127.9581       | 1064.4827       | 709.9909        |
|         | 752.2486        | 376.6279        | 251.4211        | 6  | D      | 17 | 2012.9312       | 1006.9692       | 671.6486        |
|         | 823.2857        | 412.1465        | 275.1001        | 7  | A      | 16 | 1897.9043       | 949.4558        | 633.3063        |
|         | 922.3541        | 461.6807        | 308.1229        | 8  | V      | 15 | 1826.8672       | 913.9372        | 609.6272        |
|         | 1089.3525       | 545.1799        | 363.7890        | 9  | S[167] | 14 | 1727.7987       | 864.4030        | 576.6044        |
|         | 1202.4366       | 601.7219        | 401.4837        | 10 | L      | 13 | 1560.8004       | 780.9038        | 520.9383        |
|         | 1330.4951       | 665.7512        | 444.1699        | 11 | Q      | 12 | 1447.7163       | 724.3618        | 483.2436        |
|         | 1445.5221       | 723.2647        | 482.5122        | 12 | D      | 11 | 1319.6577       | 660.3325        | 440.5574        |
|         | 1559.5650       | 780.2861        | 520.5265        | 13 | N      | 10 | 1204.6308       | 602.8190        | 402.2151        |
|         | 1673.6079       | 837.3076        | 558.5408        | 14 | N      | 9  | 1090.5879       | 545.7976        | 364.2008        |
|         | 1786.6920       | 893.8496        | 596.2355        | 15 | L      | 8  | 976.5449        | 488.7761        | 326.1865        |
|         | 1857.7291       | 929.3682        | 619.9146        | 16 | A      | 7  | 863.4609        | 432.2341        | 288.4918        |
|         | 1970.8132       | 985.9102        | 657.6092        | 17 | L      | 6  | 792.4238        | 396.7155        | 264.8128        |
|         | 2083.8972       | 1042.4523       | 695.3039        | 18 | L      | 5  | 679.3397        | 340.1735        | 227.1181        |
|         | 2212.9398       | 1106.9735       | 738.3181        | 19 | E      | 4  | 566.2557        | 283.6315        | 189.4234        |
|         | 2327.9668       | 1164.4870       | 776.6604        | 20 | D      | 3  | 437.2131        | 219.1102        | 146.4092        |
|         | 2465.0257       | 1233.0165       | 822.3467        | 21 | H      | 2  | 322.1861        | 161.5967        | 108.0669        |
|         |                 |                 |                 | 22 | R[166] | 1  | 185.1272        | 93.0672         | 62.3806         |

# Annotated spectra from Saleem et. al. 2009

K.SRS<sub>167</sub>TPSS<sub>167</sub>GNNHIDSLSVDRE/3

0.9152

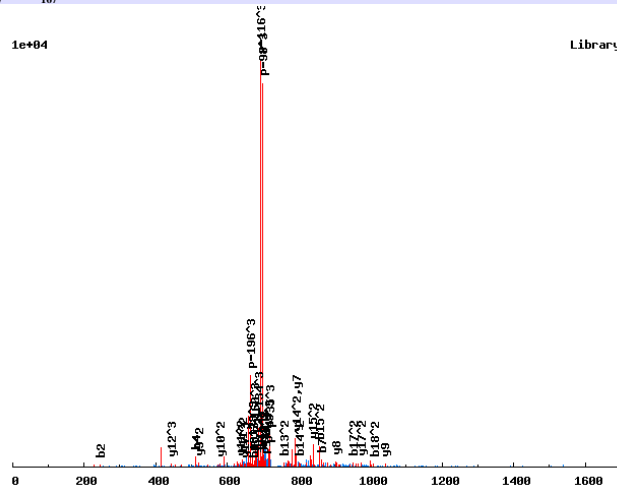

| Library | b <sup>1+</sup> | b <sup>2+</sup>  | b <sup>3+</sup> | #  | AA     | #  | y <sup>1+</sup>  | y <sup>2+</sup> | y <sup>3+</sup> |
|---------|-----------------|------------------|-----------------|----|--------|----|------------------|-----------------|-----------------|
|         | 88.0393         | 44.5233          | 30.0180         | 1  | S      | 19 |                  |                 |                 |
|         | <b>244.1404</b> | 122.5739         | 82.0517         | 2  | R      | 18 | 2101.8700        | 1051.4386       | <b>701.2948</b> |
|         | 411.1388        | 206.0730         | 137.7178        | 3  | S[167] | 17 | 1945.7688        | <b>973.3881</b> | <b>649.2611</b> |
|         | <b>512.1865</b> | 256.5969         | 171.4003        | 4  | T      | 16 | 1778.7705        | 889.8889        | 593.5950        |
|         | 609.2392        | 305.1233         | 203.7513        | 5  | P      | 15 | 1677.7228        | <b>839.3650</b> | 559.9125        |
|         | <b>696.2713</b> | 348.6393         | 232.7619        | 6  | S      | 14 | 1580.6700        | <b>790.8387</b> | 527.5615        |
|         | <b>863.2696</b> | 432.1384         | 288.4281        | 7  | S[167] | 13 | 1493.6380        | 747.3226        | 498.5509        |
|         | 920.2911        | 460.6492         | 307.4352        | 8  | G      | 12 | 1326.6397        | 663.8235        | <b>442.8847</b> |
|         | 1034.3340       | 517.6706         | 345.4495        | 9  | N      | 11 | 1269.6182        | <b>635.3127</b> | 423.8776        |
|         | 1148.3769       | 574.6921         | 383.4638        | 10 | N      | 10 | 1155.5753        | <b>578.2913</b> | 385.8633        |
|         | 1285.4358       | <b>643.2216</b>  | 429.1501        | 11 | H      | 9  | <b>1041.5323</b> | <b>521.2698</b> | 347.8490        |
|         | 1398.5199       | <b>699.7636</b>  | 466.8448        | 12 | I      | 8  | <b>904.4734</b>  | 452.7403        | 302.1627        |
|         | 1513.5468       | <b>757.2771</b>  | 505.1871        | 13 | D      | 7  | <b>791.3894</b>  | 396.1983        | 264.4680        |
|         | 1600.5789       | <b>800.7931</b>  | 534.1978        | 14 | S      | 6  | <b>676.3624</b>  | 338.6849        | 226.1257        |
|         | 1713.6629       | <b>857.3351</b>  | 571.8925        | 15 | L      | 5  | 589.3304         | 295.1688        | 197.1150        |
|         | 1800.6950       | 900.8511         | 600.9032        | 16 | S      | 4  | 476.2463         | 238.6268        | 159.4203        |
|         | 1899.7634       | <b>950.3853</b>  | 633.9260        | 17 | V      | 3  | 389.2143         | 195.1108        | 130.4096        |
|         | 2014.7903       | <b>1007.8988</b> | <b>672.2683</b> | 18 | D      | 2  | 290.1459         | 145.5766        | 97.3868         |
|         |                 |                  |                 | 19 | R      | 1  | 175.1190         | 88.0631         | 59.0445         |

# Annotated spectra from Saleem et. al. 2009

R.SRS<sub>167</sub>VQS<sub>167</sub>LPLEFK.E/2

0.9904

1e+04

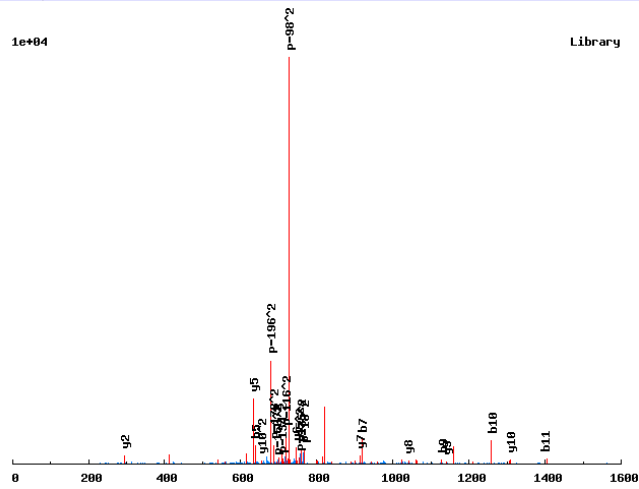

Library

| b <sup>1+</sup> | b <sup>2+</sup> | #  | AA     | #  | y <sup>1+</sup> | y <sup>2+</sup> |
|-----------------|-----------------|----|--------|----|-----------------|-----------------|
| 88.0393         | 44.5233         | 1  | S      | 12 |                 |                 |
| 244.1404        | 122.5739        | 2  | R      | 11 | 1463.6695       | 732.3384        |
| 411.1388        | 206.0730        | 3  | S[167] | 10 | 1307.5684       | 654.2878        |
| 510.2072        | 255.6072        | 4  | V      | 9  | 1140.5700       | 570.7887        |
| 638.2658        | 319.6365        | 5  | Q      | 8  | 1041.5016       | 521.2545        |
| 805.2641        | 403.1357        | 6  | S[167] | 7  | 913.4430        | 457.2252        |
| 918.3482        | 459.6777        | 7  | L      | 6  | 746.4447        | 373.7260        |
| 1015.4010       | 508.2041        | 8  | P      | 5  | 633.3606        | 317.1840        |
| 1128.4850       | 564.7461        | 9  | L      | 4  | 536.3079        | 268.6576        |
| 1257.5276       | 629.2674        | 10 | E      | 3  | 423.2238        | 212.1155        |
| 1404.5960       | 702.8016        | 11 | F      | 2  | 294.1812        | 147.5942        |
|                 |                 | 12 | K      | 1  | 147.1128        | 74.0600         |

# Annotated spectra from Saleem et. al. 2009

K<sub>167</sub>R<sub>166</sub>T<sub>181</sub>NDSSLLPGYMDSATLLHPGK<sub>136</sub>I/3

0.9488

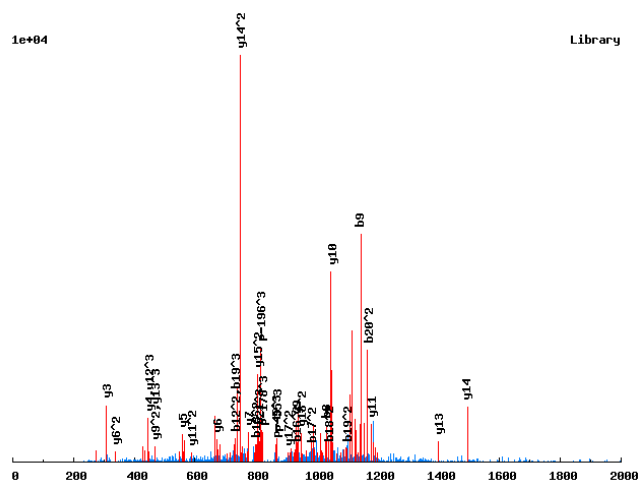

| Library | b <sup>1+</sup> | b <sup>2+</sup> | b <sup>3+</sup> | #  | AA | #        | y <sup>1+</sup> | y <sup>2+</sup> | y <sup>3+</sup> |
|---------|-----------------|-----------------|-----------------|----|----|----------|-----------------|-----------------|-----------------|
|         | 168.0056        | 84.5065         | 56.6734         | 1  | S  | [167] 23 |                 |                 |                 |
|         | 334.1150        | 167.5611        | 112.0432        | 2  | R  | [166] 22 | 2471.1755       | 1236.0914       | 824.3967        |
|         | 515.1290        | 258.0682        | 172.3812        | 3  | T  | [181] 21 | 2305.0661       | 1153.0367       | 769.0269        |
|         | 629.1720        | 315.0896        | 210.3955        | 4  | N  | 20       | 2124.0521       | 1062.5297       | 708.6889        |
|         | 744.1989        | 372.6031        | 248.7378        | 5  | D  | 19       | 2010.0092       | 1005.5082       | 670.6746        |
|         | 831.2309        | 416.1191        | 277.7485        | 6  | S  | 18       | 1894.9822       | 947.9948        | 632.3323        |
|         | 918.2630        | 459.6351        | 306.7592        | 7  | S  | 17       | 1807.9502       | 904.4787        | 603.3216        |
|         | 1031.3470       | 516.1772        | 344.4539        | 8  | L  | 16       | 1720.9182       | 860.9627        | 574.3109        |
|         | 1144.4311       | 572.7192        | 382.1485        | 9  | L  | 15       | 1607.8341       | 804.4207        | 536.6162        |
|         | 1241.4838       | 621.2456        | 414.4995        | 10 | P  | 14       | 1494.7500       | 747.8787        | 498.9215        |
|         | 1298.5053       | 649.7563        | 433.5066        | 11 | G  | 13       | 1397.6973       | 699.3523        | 466.5706        |
|         | 1461.5686       | 731.2880        | 487.8611        | 12 | Y  | 12       | 1340.6758       | 670.8416        | 447.5635        |
|         | 1592.6091       | 796.8082        | 531.5412        | 13 | M  | 11       | 1177.6125       | 589.3099        | 393.2090        |
|         | 1707.6361       | 854.3217        | 569.8835        | 14 | D  | 10       | 1046.5720       | 523.7896        | 349.5289        |
|         | 1794.6681       | 897.8377        | 598.8942        | 15 | S  | 9        | 931.5451        | 466.2762        | 311.1865        |
|         | 1865.7052       | 933.3562        | 622.5733        | 16 | A  | 8        | 844.5130        | 422.7602        | 282.1759        |
|         | 1966.7529       | 983.8801        | 656.2558        | 17 | T  | 7        | 773.4759        | 387.2416        | 258.4968        |
|         | 2079.8369       | 1040.4221       | 693.9505        | 18 | L  | 6        | 672.4282        | 336.7178        | 224.8143        |
|         | 2192.9210       | 1096.9641       | 731.6452        | 19 | L  | 5        | 559.3442        | 280.1757        | 187.1196        |
|         | 2329.9799       | 1165.4936       | 777.3315        | 20 | H  | 4        | 446.2601        | 223.6337        | 149.4249        |
|         | 2427.0327       | 1214.0200       | 809.6824        | 21 | P  | 3        | 309.2012        | 155.1042        | 103.7386        |
|         | 2484.0541       | 1242.5307       | 828.6896        | 22 | G  | 2        | 212.1485        | 106.5779        | 71.3877         |
|         |                 |                 |                 | 23 | K  | [136] 1  | 155.1270        | 78.0671         | 52.3805         |

# Annotated spectra from Saleem et. al. 2009

R.S<sub>167</sub>SADNLLPSLQK.S/2

0.7893

1e+04

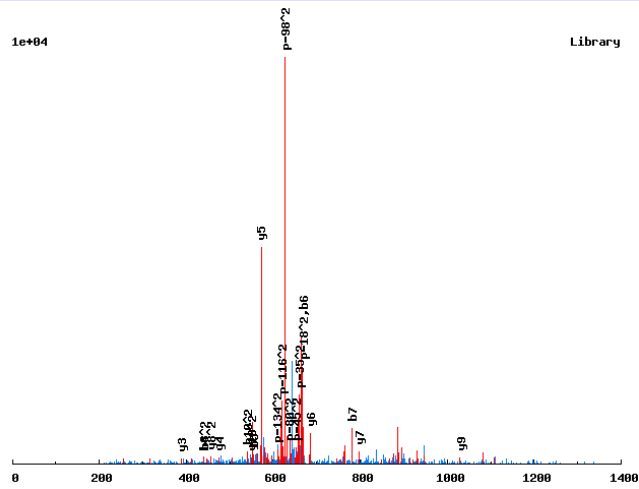

| Library | b <sup>1+</sup> | b <sup>2+</sup> | #  | AA | #  | y <sup>1+</sup> | y <sup>2+</sup> |
|---------|-----------------|-----------------|----|----|----|-----------------|-----------------|
|         | 168.0056        | 84.5065         | 1  | S  | 12 |                 |                 |
|         | 255.0377        | 128.0225        | 2  | S  | 11 | 1185.6474       | 593.3273        |
|         | 326.0748        | 163.5410        | 3  | A  | 10 | 1098.6153       | 549.8113        |
|         | 441.1017        | 221.0545        | 4  | D  | 9  | 1027.5782       | 514.2928        |
|         | 555.1447        | 278.0760        | 5  | N  | 8  | 912.5513        | 456.7793        |
|         | 668.2287        | 334.6180        | 6  | L  | 7  | 798.5084        | 399.7578        |
|         | 781.3128        | 391.1600        | 7  | L  | 6  | 685.4243        | 343.2158        |
|         | 878.3655        | 439.6864        | 8  | P  | 5  | 572.3402        | 286.6738        |
|         | 965.3976        | 483.2024        | 9  | S  | 4  | 475.2875        | 238.1474        |
|         | 1078.4816       | 539.7445        | 10 | L  | 3  | 388.2554        | 194.6314        |
|         | 1206.5402       | 603.7737        | 11 | Q  | 2  | 275.1714        | 138.0893        |
|         |                 |                 | 12 | K  | 1  | 147.1128        | 74.0600         |

# Annotated spectra from Saleem et. al. 2009

R.S<sub>167</sub>SAQEDAPIVIR.R/2

0.9909

1e+04

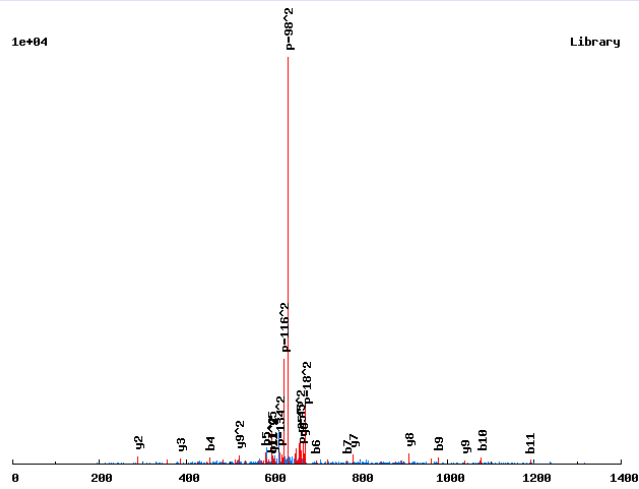

| Library | b <sup>1+</sup> | b <sup>2+</sup> | #  | AA | #  | y <sup>1+</sup> | y <sup>2+</sup> |
|---------|-----------------|-----------------|----|----|----|-----------------|-----------------|
|         | 168.0056        | 84.5065         | 1  | S  | 11 | 1198.6426       | 599.8249        |
|         | 255.0377        | 128.0225        | 2  | S  | 11 | 1111.6106       | 556.3089        |
|         | 326.0748        | 163.5410        | 3  | A  | 10 | 1040.5735       | 520.7904        |
|         | 454.1334        | 227.5703        | 4  | Q  | 9  | 912.5149        | 456.7611        |
|         | 583.1760        | 292.0916        | 5  | E  | 8  | 783.4723        | 392.2398        |
|         | 698.2029        | 349.6051        | 6  | D  | 7  | 668.4454        | 334.7263        |
|         | 769.2400        | 385.1236        | 7  | A  | 6  | 597.4082        | 299.2078        |
|         | 866.2928        | 433.6500        | 8  | P  | 5  | 500.3555        | 250.6814        |
|         | 979.3768        | 490.1921        | 9  | I  | 4  | 387.2714        | 194.1393        |
|         | 1078.4452       | 539.7263        | 10 | V  | 3  | 288.2030        | 144.6051        |
|         | 1191.5293       | 596.2683        | 11 | I  | 2  | 175.1190        | 88.0631         |
|         |                 |                 | 12 | R  | 1  |                 |                 |

# Annotated spectra from Saleem et. al. 2009

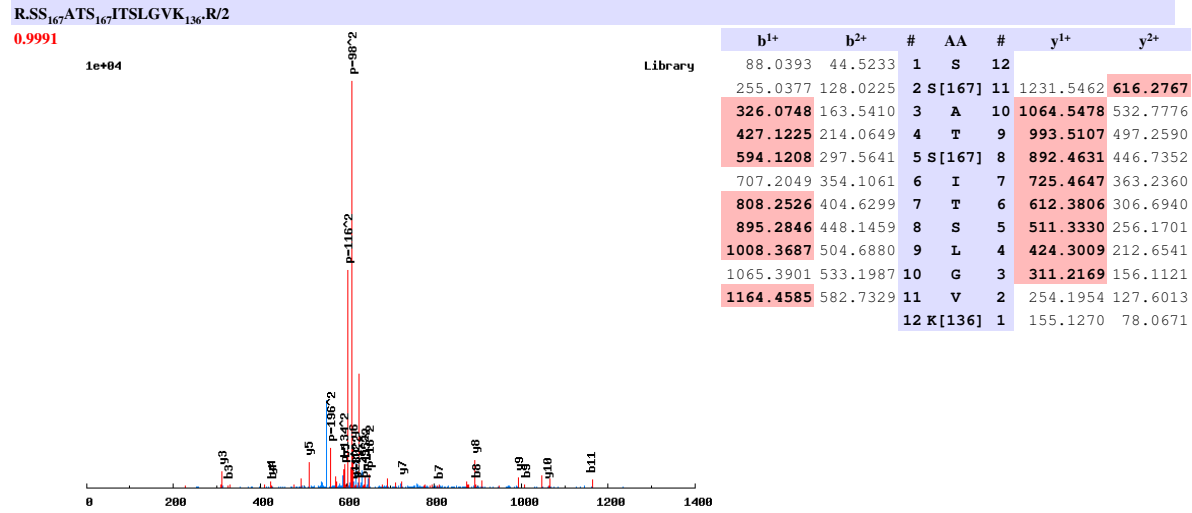

# Annotated spectra from Saleem et. al. 2009

R.SSEEQPENIS<sub>167</sub>K.S/2

0.7914

1e+04

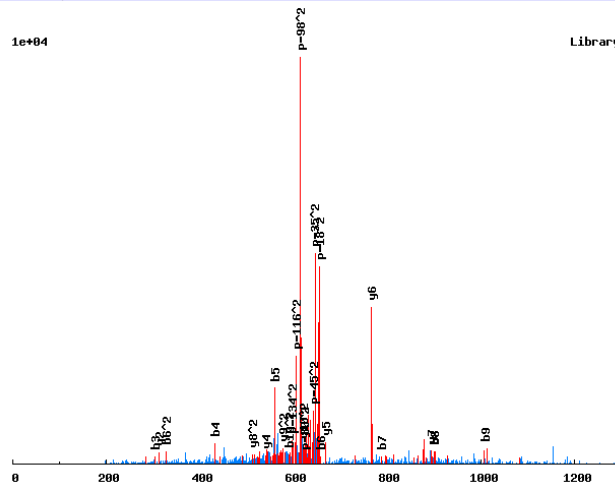

| Library | b <sup>1+</sup> | b <sup>2+</sup> | #  | AA      | #  | y <sup>1+</sup> | y <sup>2+</sup> |
|---------|-----------------|-----------------|----|---------|----|-----------------|-----------------|
|         | 88.0393         | 44.5233         | 1  | S       | 11 |                 |                 |
|         | 175.0713        | 88.0393         | 2  | S       | 10 | 1240.5093       | 620.7583        |
|         | 304.1139        | 152.5606        | 3  | E       | 9  | 1153.4773       | 577.2423        |
|         | 433.1565        | 217.0819        | 4  | E       | 8  | 1024.4347       | 512.7210        |
|         | 561.2151        | 281.1112        | 5  | Q       | 7  | 895.3921        | 448.1997        |
|         | 658.2679        | 329.6376        | 6  | P       | 6  | 767.3335        | 384.1704        |
|         | 787.3105        | 394.1589        | 7  | E       | 5  | 670.2807        | 335.6440        |
|         | 901.3534        | 451.1803        | 8  | N       | 4  | 541.2382        | 271.1227        |
|         | 1014.4374       | 507.7224        | 9  | I       | 3  | 427.1952        | 214.1013        |
|         | 1181.4358       | 591.2215        | 10 | S [167] | 2  | 314.1112        | 157.5592        |
|         |                 |                 | 11 | K       | 1  | 147.1128        | 74.0600         |



# Annotated spectra from Saleem et. al. 2009

R.SS<sub>167</sub>ENSRANS<sub>167</sub>TST<sub>181</sub>LEGNEK.K/3

0.5853

1e+04

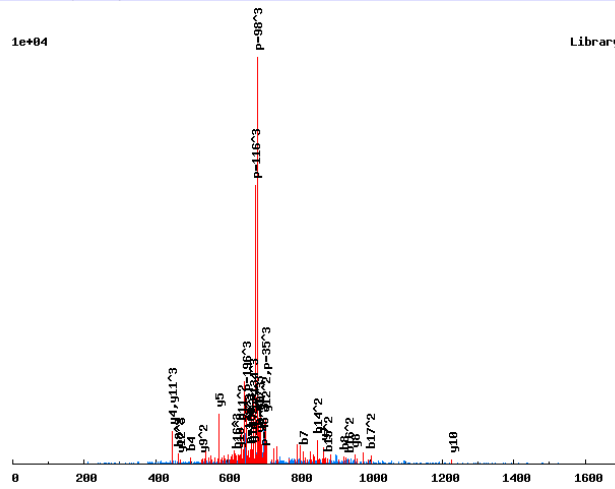

| Library | b <sup>1+</sup> | b <sup>2+</sup> | b <sup>3+</sup> | #  | AA     | #  | y <sup>1+</sup> | y <sup>2+</sup> | y <sup>3+</sup> |
|---------|-----------------|-----------------|-----------------|----|--------|----|-----------------|-----------------|-----------------|
|         | 88.0393         | 44.5233         | 30.0180         | 1  | S      | 18 |                 |                 |                 |
|         | 255.0377        | 128.0225        | 85.6841         | 2  | S[167] | 17 | 2063.7356       | 1032.3714       | 688.5834        |
|         | 384.0803        | 192.5438        | 128.6983        | 3  | E      | 16 | 1896.7372       | 948.8722        | 632.9173        |
|         | 498.1232        | 249.5652        | 166.7126        | 4  | N      | 15 | 1767.6946       | 884.3510        | 589.9031        |
|         | 585.1552        | 293.0813        | 195.7233        | 5  | S      | 14 | 1653.6517       | 827.3295        | 551.8888        |
|         | 741.2563        | 371.1318        | 247.7570        | 6  | R      | 13 | 1566.6197       | 783.8135        | 522.8781        |
|         | 812.2934        | 406.6504        | 271.4360        | 7  | A      | 12 | 1410.5186       | 705.7629        | 470.8444        |
|         | 926.3364        | 463.6718        | 309.4503        | 8  | N      | 11 | 1339.4814       | 670.2444        | 447.1653        |
|         | 1093.3347       | 547.1710        | 365.1164        | 9  | S[167] | 10 | 1225.4385       | 613.2229        | 409.1510        |
|         | 1194.3824       | 597.6948        | 398.7990        | 10 | T      | 9  | 1058.4402       | 529.7237        | 353.4849        |
|         | 1281.4144       | 641.2109        | 427.8097        | 11 | S      | 8  | 957.3925        | 479.1999        | 319.8023        |
|         | 1462.4285       | 731.7179        | 488.1477        | 12 | T[181] | 7  | 870.3604        | 435.6839        | 290.7917        |
|         | 1575.5125       | 788.2599        | 525.8424        | 13 | L      | 6  | 689.3464        | 345.1769        | 230.4537        |
|         | 1704.5551       | 852.7812        | 568.8566        | 14 | E      | 5  | 576.2624        | 288.6348        | 192.7590        |
|         | 1761.5766       | 881.2919        | 587.8637        | 15 | G      | 4  | 447.2198        | 224.1135        | 149.7448        |
|         | 1875.6195       | 938.3134        | 625.8780        | 16 | N      | 3  | 390.1983        | 195.6028        | 130.7376        |
|         | 2004.6621       | 1002.8347       | 668.8922        | 17 | E      | 2  | 276.1554        | 138.5813        | 92.7233         |
|         |                 |                 |                 | 18 | K      | 1  | 147.1128        | 74.0600         | 49.7091         |

# Annotated spectra from Saleem et. al. 2009

R.S<sub>167</sub>SES<sub>167</sub>IGDLPHR.V/2

0.9247

1e+04

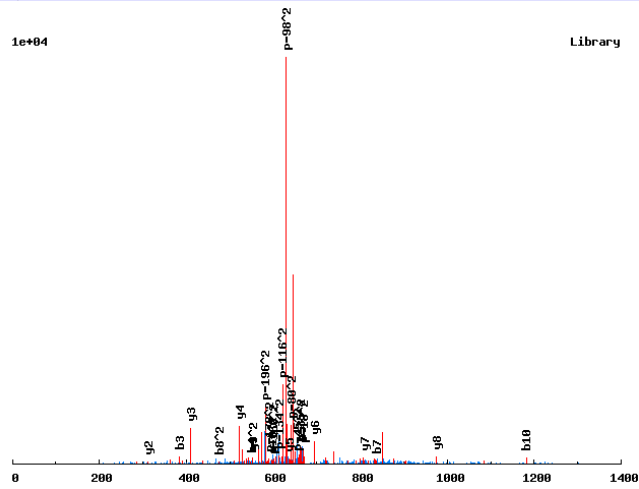

| Library | b <sup>1+</sup> | b <sup>2+</sup> | #  | AA     | #  | y <sup>1+</sup> | y <sup>2+</sup> |
|---------|-----------------|-----------------|----|--------|----|-----------------|-----------------|
|         | 168.0056        | 84.5065         | 1  | S[167] | 11 |                 |                 |
|         | 255.0377        | 128.0225        | 2  | S      | 10 | 1190.5201       | 595.7637        |
|         | 384.0803        | 192.5438        | 3  | E      | 9  | 1103.4881       | 552.2477        |
|         | 551.0786        | 276.0430        | 4  | S[167] | 8  | 974.4455        | 487.7264        |
|         | 664.1627        | 332.5850        | 5  | I      | 7  | 807.4471        | 404.2272        |
|         | 721.1841        | 361.0957        | 6  | G      | 6  | 694.3631        | 347.6852        |
|         | 836.2111        | 418.6092        | 7  | D      | 5  | 637.3416        | 319.1745        |
|         | 949.2951        | 475.1512        | 8  | L      | 4  | 522.3147        | 261.6610        |
|         | 1046.3479       | 523.6776        | 9  | P      | 3  | 409.2306        | 205.1189        |
|         | 1183.4068       | 592.2070        | 10 | H      | 2  | 312.1779        | 156.5926        |
|         |                 |                 | 11 | R      | 1  | 175.1190        | 88.0631         |

# Annotated spectra from Saleem et. al. 2009

R.SS<sub>167</sub>FASDFLSR.K/2

0.9967

1e+04

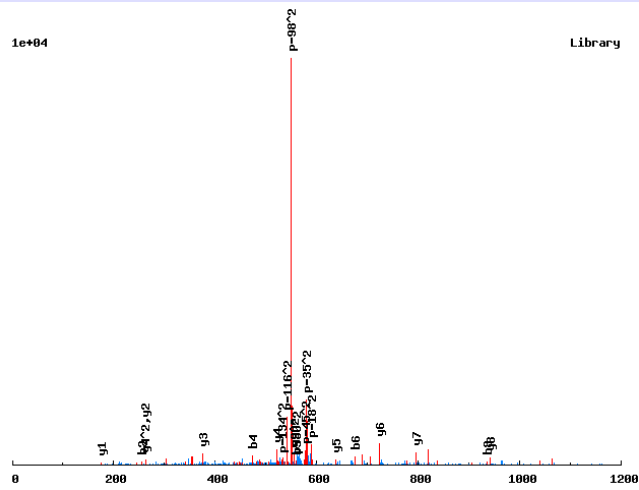

| Library | b <sup>1+</sup> | b <sup>2+</sup> | #  | AA     | #  | y <sup>1+</sup> | y <sup>2+</sup> |
|---------|-----------------|-----------------|----|--------|----|-----------------|-----------------|
|         | 88.0393         | 44.5233         | 1  | S      | 10 |                 |                 |
|         | <b>255.0377</b> | 128.0225        | 2  | S[167] | 9  | 1109.4663       | <b>555.2368</b> |
|         | 402.1061        | 201.5567        | 3  | F      | 8  | 942.4679        | 471.7376        |
|         | <b>473.1432</b> | 237.0752        | 4  | A      | 7  | 795.3995        | 398.2034        |
|         | <b>560.1752</b> | 280.5913        | 5  | S      | 6  | 724.3624        | 362.6849        |
|         | <b>675.2022</b> | 338.1047        | 6  | D      | 5  | 637.3304        | 319.1688        |
|         | 822.2706        | 411.6389        | 7  | F      | 4  | 522.3035        | <b>261.6554</b> |
|         | <b>935.3546</b> | 468.1810        | 8  | L      | 3  | 375.2350        | 188.1212        |
|         | 1022.3867       | 511.6970        | 9  | S      | 2  | 262.1510        | 131.5791        |
|         |                 |                 | 10 | R      | 1  | 175.1190        | 88.0631         |

# Annotated spectra from Saleem et. al. 2009

K.SSGIDEDEVVT<sub>181</sub>PAEDAKEEEEEHPPLPAR.R/3

0.9991

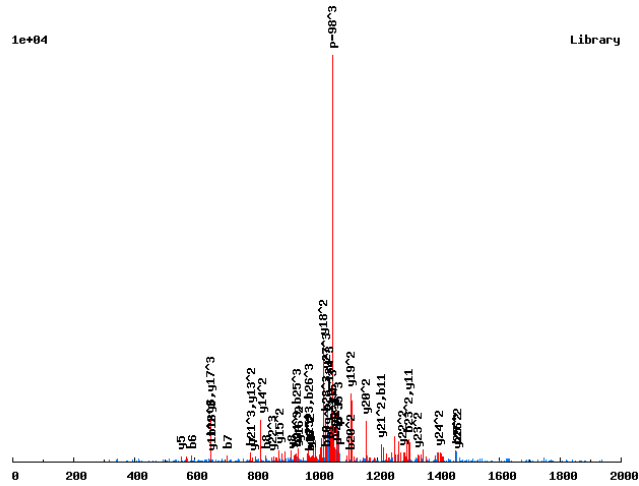

| Library | b <sup>1+</sup>  | b <sup>2+</sup>  | b <sup>3+</sup>  | #  | AA      | #  | y <sup>1+</sup>  | y <sup>2+</sup>  | y <sup>3+</sup>  |
|---------|------------------|------------------|------------------|----|---------|----|------------------|------------------|------------------|
|         | 88.0393          | 44.5233          | 30.0180          | 1  | S       | 29 |                  |                  |                  |
|         | 175.0713         | 88.0393          | 59.0286          | 2  | S       | 28 | 3168.3892        | 1584.6982        | 1056.8012        |
|         | 232.0928         | 116.5500         | 78.0358          | 3  | G       | 27 | 3081.3571        | 1541.1822        | <b>1027.7906</b> |
|         | 345.1769         | 173.0921         | 115.7305         | 4  | I       | 26 | 3024.3357        | 1512.6715        | 1008.7834        |
|         | 460.2038         | 230.6055         | 154.0728         | 5  | D       | 25 | 2911.2516        | <b>1456.1295</b> | <b>971.0887</b>  |
|         | <b>589.2464</b>  | 295.1268         | 197.0870         | 6  | E       | 24 | 2796.2247        | <b>1398.6160</b> | <b>932.7464</b>  |
|         | <b>704.2733</b>  | 352.6403         | 235.4293         | 7  | D       | 23 | 2667.1821        | <b>1334.0947</b> | 889.7322         |
|         | <b>833.3159</b>  | 417.1616         | 278.4435         | 8  | E       | 22 | 2552.1552        | <b>1276.5812</b> | <b>851.3899</b>  |
|         | <b>932.3843</b>  | 466.6958         | 311.4663         | 9  | V       | 21 | 2423.1126        | <b>1212.0599</b> | 808.3757         |
|         | <b>1031.4527</b> | 516.2300         | 344.4891         | 10 | V       | 20 | 2324.0442        | <b>1162.5257</b> | 775.3529         |
|         | <b>1212.4668</b> | 606.7370         | 404.8271         | 11 | T [181] | 19 | 2224.9757        | <b>1112.9915</b> | 742.3301         |
|         | 1309.5195        | 655.2634         | 437.1780         | 12 | P       | 18 | 2043.9617        | <b>1022.4845</b> | 681.9921         |
|         | 1380.5566        | 690.7820         | 460.8571         | 13 | A       | 17 | 1946.9090        | <b>973.9581</b>  | <b>649.6412</b>  |
|         | 1509.5992        | 755.3032         | 503.8713         | 14 | E       | 16 | 1875.8719        | <b>938.4396</b>  | 625.9621         |
|         | 1624.6262        | 812.8167         | 542.2136         | 15 | D       | 15 | 1746.8293        | <b>873.9183</b>  | 582.9479         |
|         | 1695.6633        | 848.3353         | 565.8926         | 16 | A       | 14 | 1631.8023        | <b>816.4048</b>  | 544.6056         |
|         | 1823.7582        | 912.3828         | 608.5909         | 17 | K       | 13 | 1560.7652        | <b>780.8863</b>  | 520.9266         |
|         | 1952.8008        | <b>976.9040</b>  | <b>651.6051</b>  | 18 | E       | 12 | 1432.6703        | 716.8388         | 478.2283         |
|         | 2081.8434        | <b>1041.4253</b> | 694.6193         | 19 | E       | 11 | <b>1303.6277</b> | <b>652.3175</b>  | 435.2141         |
|         | 2210.8860        | <b>1105.9466</b> | 737.6335         | 20 | E       | 10 | 1174.5851        | 587.7962         | 392.1999         |
|         | 2339.9286        | 1170.4679        | <b>780.6477</b>  | 21 | E       | 9  | 1045.5425        | 523.2749         | 349.1857         |
|         | 2468.9712        | 1234.9892        | 823.6619         | 22 | E       | 8  | <b>916.4999</b>  | 458.7536         | 306.1715         |
|         | 2606.0301        | <b>1303.5187</b> | 869.3482         | 23 | H       | 7  | <b>787.4573</b>  | 394.2323         | 263.1573         |
|         | 2703.0828        | 1352.0451        | 901.6991         | 24 | P       | 6  | <b>650.3984</b>  | 325.7028         | 217.4710         |
|         | 2800.1356        | 1400.5714        | <b>934.0501</b>  | 25 | P       | 5  | <b>553.3456</b>  | 277.1765         | 185.1201         |
|         | 2913.2197        | <b>1457.1135</b> | <b>971.7447</b>  | 26 | L       | 4  | 456.2929         | 228.6501         | 152.7691         |
|         | 3010.2724        | 1505.6399        | 1004.0957        | 27 | P       | 3  | 343.2088         | 172.1080         | 115.0745         |
|         | 3081.3095        | 1541.1584        | <b>1027.7747</b> | 28 | A       | 2  | 246.1561         | 123.5817         | 82.7235          |
|         |                  |                  |                  | 29 | R       | 1  | 175.1190         | 88.0631          | 59.0445          |

# Annotated spectra from Saleem et. al. 2009

R.S<sub>167</sub>SHS<sub>167</sub>FERLPTPK.L/2

0.6141

1e+04

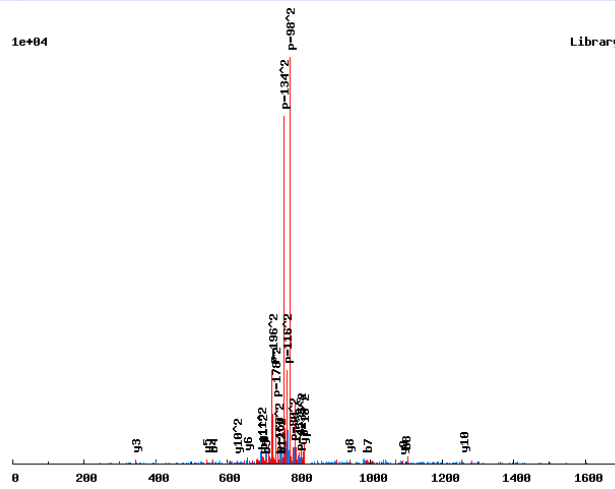

| Library | b <sup>1+</sup> | b <sup>2+</sup> | #  | AA     | #  | y <sup>1+</sup> | y <sup>2+</sup> |
|---------|-----------------|-----------------|----|--------|----|-----------------|-----------------|
|         | 168.0056        | 84.5065         | 1  | S[167] | 13 |                 |                 |
|         | 255.0377        | 128.0225        | 2  | S      | 12 | 1479.6992       | 740.3532        |
|         | 392.0966        | 196.5519        | 3  | H      | 11 | 1392.6671       | 696.8372        |
|         | 559.0949        | 280.0511        | 4  | S[167] | 10 | 1255.6082       | 628.3077        |
|         | 706.1634        | 353.5853        | 5  | F      | 9  | 1088.6099       | 544.8086        |
|         | 835.2059        | 418.1066        | 6  | E      | 8  | 941.5414        | 471.2744        |
|         | 991.3071        | 496.1572        | 7  | R      | 7  | 812.4989        | 406.7531        |
|         | 1104.3911       | 552.6992        | 8  | L      | 6  | 656.3977        | 328.7025        |
|         | 1201.4439       | 601.2256        | 9  | P      | 5  | 543.3137        | 272.1605        |
|         | 1302.4916       | 651.7494        | 10 | T      | 4  | 446.2609        | 223.6341        |
|         | 1399.5443       | 700.2758        | 11 | P      | 3  | 345.2132        | 173.1103        |
|         | 1500.5920       | 750.7996        | 12 | T      | 2  | 248.1605        | 124.5839        |
|         |                 |                 | 13 | K      | 1  | 147.1128        | 74.0600         |

# Annotated spectra from Saleem et. al. 2009

R.S<sub>167</sub>SHSS<sub>167</sub>K<sub>136</sub>LGEQIDGR<sub>166</sub>K/3

0.9176

1e+04

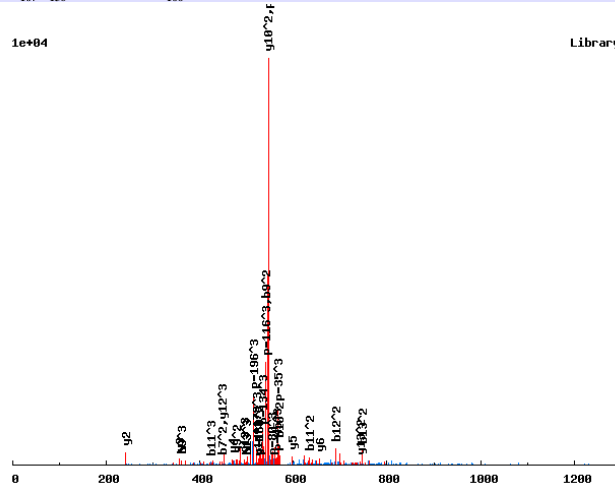

| Library | b <sup>1+</sup> | b <sup>2+</sup> | b <sup>3+</sup> | #  | AA     | #  | y <sup>1+</sup> | y <sup>2+</sup> | y <sup>3+</sup> |
|---------|-----------------|-----------------|-----------------|----|--------|----|-----------------|-----------------|-----------------|
|         | 168.0056        | 84.5065         | 56.6734         | 1  | S[167] | 15 |                 |                 |                 |
|         | 255.0377        | 128.0225        | 85.6841         | 2  | S      | 14 | 1568.7183       | 784.8628        | 523.5776        |
|         | 392.0966        | 196.5519        | 131.3704        | 3  | H      | 13 | 1481.6863       | 741.3468        | 494.5669        |
|         | 479.1286        | 240.0679        | 160.3811        | 4  | S      | 12 | 1344.6274       | 672.8173        | 448.8806        |
|         | 646.1270        | 323.5671        | 216.0472        | 5  | S[167] | 11 | 1257.5953       | 629.3013        | 419.8700        |
|         | 782.2361        | 391.6217        | 261.4169        | 6  | K[136] | 10 | 1090.5970       | 545.8021        | 364.2038        |
|         | 895.3202        | 448.1637        | 299.1116        | 7  | L      | 9  | 954.4878        | 477.7476        | 318.8341        |
|         | 952.3417        | 476.6745        | 318.1187        | 8  | G      | 8  | 841.4038        | 421.2055        | 281.1394        |
|         | 1081.3842       | 541.1958        | 361.1329        | 9  | E      | 7  | 784.3823        | 392.6948        | 262.1323        |
|         | 1138.4057       | 569.7065        | 380.1401        | 10 | G      | 6  | 655.3397        | 328.1735        | 219.1181        |
|         | 1266.4643       | 633.7358        | 422.8263        | 11 | Q      | 5  | 598.3183        | 299.6628        | 200.1109        |
|         | 1379.5483       | 690.2778        | 460.5210        | 12 | I      | 4  | 470.2597        | 235.6335        | 157.4247        |
|         | 1494.5753       | 747.7913        | 498.8633        | 13 | D      | 3  | 357.1756        | 179.0914        | 119.7301        |
|         | 1551.5967       | 776.3020        | 517.8704        | 14 | G      | 2  | 242.1487        | 121.5780        | 81.3877         |
|         |                 |                 |                 | 15 | R[166] | 1  | 185.1272        | 93.0672         | 62.3806         |

# Annotated spectra from Saleem et. al. 2009

K.SSILS<sub>167</sub>RANSS<sub>167</sub>ANLAAK.S/3

0.7396

1e+04

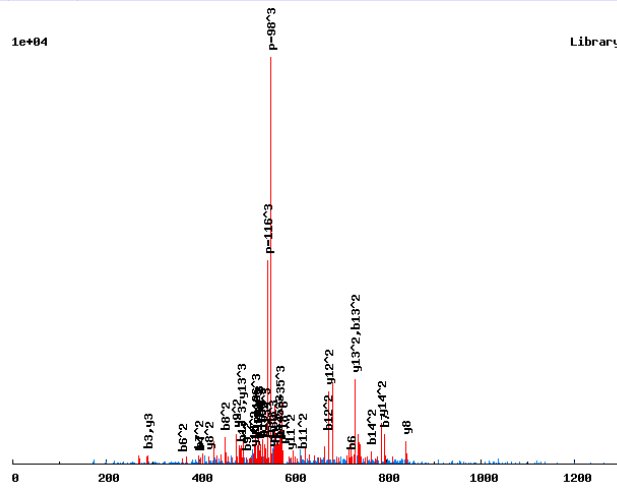

| Library | b <sup>1+</sup> | b <sup>2+</sup> | b <sup>3+</sup> | #  | AA     | #  | y <sup>1+</sup> | y <sup>2+</sup> | y <sup>3+</sup> |
|---------|-----------------|-----------------|-----------------|----|--------|----|-----------------|-----------------|-----------------|
|         | 88.0393         | 44.5233         | 30.0180         | 1  | S      | 16 |                 |                 |                 |
|         | 175.0713        | 88.0393         | 59.0286         | 2  | S      | 15 | 1662.7612       | 831.8842        | 554.9252        |
|         | 288.1554        | 144.5813        | 96.7233         | 3  | I      | 14 | 1575.7291       | 788.3682        | 525.9146        |
|         | 401.2395        | 201.1234        | 134.4180        | 4  | L      | 13 | 1462.6451       | 731.8262        | 488.2199        |
|         | 568.2378        | 284.6226        | 190.0841        | 5  | S[167] | 12 | 1349.5610       | 675.2842        | 450.5252        |
|         | 724.3389        | 362.6731        | 242.1178        | 6  | R      | 11 | 1182.5627       | 591.7850        | 394.8591        |
|         | 795.3760        | 398.1917        | 265.7969        | 7  | A      | 10 | 1026.4616       | 513.7344        | 342.8254        |
|         | 909.4190        | 455.2131        | 303.8112        | 8  | N      | 9  | 955.4244        | 478.2159        | 319.1463        |
|         | 996.4510        | 498.7291        | 332.8219        | 9  | S      | 8  | 841.3815        | 421.1944        | 281.1320        |
|         | 1163.4494       | 582.2283        | 388.4880        | 10 | S[167] | 7  | 754.3495        | 377.6784        | 252.1213        |
|         | 1234.4865       | 617.7469        | 412.1670        | 11 | A      | 6  | 587.3511        | 294.1792        | 196.4552        |
|         | 1348.5294       | 674.7683        | 450.1813        | 12 | N      | 5  | 516.3140        | 258.6606        | 172.7762        |
|         | 1461.6135       | 731.3104        | 487.8760        | 13 | L      | 4  | 402.2711        | 201.6392        | 134.7619        |
|         | 1532.6506       | 766.8289        | 511.5550        | 14 | A      | 3  | 289.1870        | 145.0971        | 97.0672         |
|         | 1603.6877       | 802.3475        | 535.2341        | 15 | A      | 2  | 218.1499        | 109.5786        | 73.3882         |
|         |                 |                 |                 | 16 | K      | 1  | 147.1128        | 74.0600         | 49.7091         |

# Annotated spectra from Saleem et. al. 2009

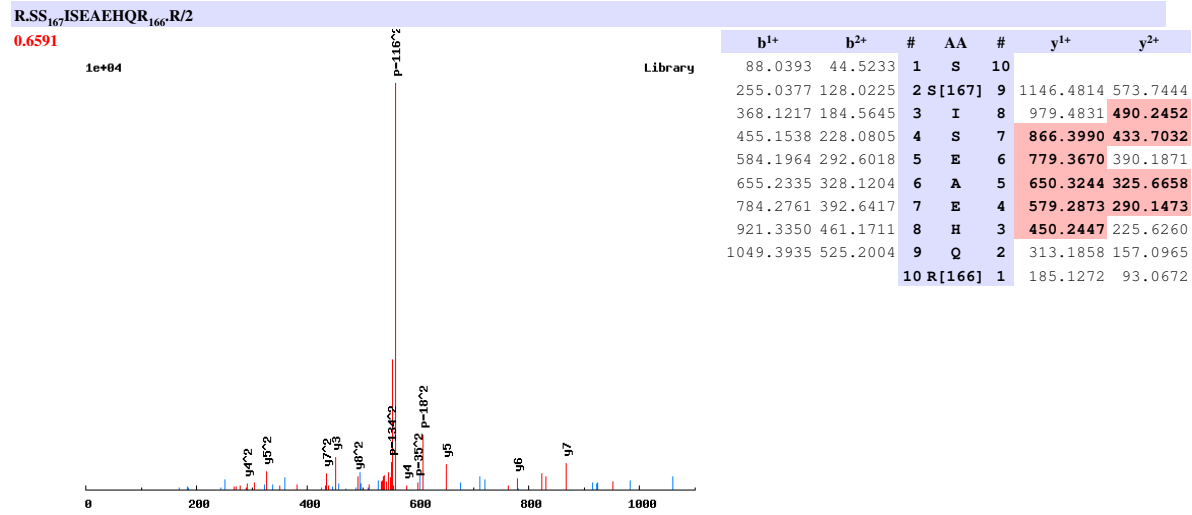



# Annotated spectra from Saleem et. al. 2009

R.SS<sub>167</sub>KIS<sub>167</sub>PLSASASGPLTLQK.G/3

0.9819

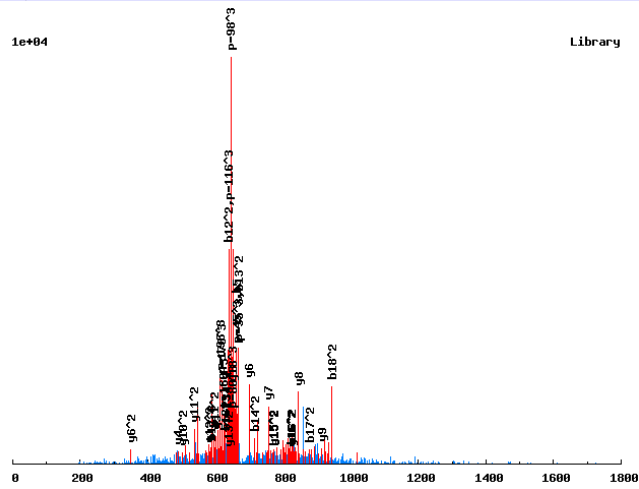

| Library | b <sup>1+</sup> | b <sup>2+</sup> | b <sup>3+</sup> | #  | AA     | #  | y <sup>1+</sup> | y <sup>2+</sup> | y <sup>3+</sup> |
|---------|-----------------|-----------------|-----------------|----|--------|----|-----------------|-----------------|-----------------|
|         | 88.0393         | 44.5233         | 30.0180         | 1  | S      | 19 |                 |                 |                 |
|         | 255.0377        | 128.0225        | 85.6841         | 2  | S[167] | 18 | 1944.9443       | 972.9758        | 648.9863        |
|         | 383.1326        | 192.0700        | 128.3824        | 3  | K      | 17 | 1777.9459       | 889.4766        | 593.3202        |
|         | 496.2167        | 248.6120        | 166.0771        | 4  | I      | 16 | 1649.8510       | 825.4291        | 550.6218        |
|         | 663.2151        | 332.1112        | 221.7432        | 5  | S[167] | 15 | 1536.7669       | 768.8871        | 512.9272        |
|         | 760.2678        | 380.6375        | 254.0941        | 6  | P      | 14 | 1369.7685       | 685.3879        | 457.2610        |
|         | 873.3519        | 437.1796        | 291.7888        | 7  | L      | 13 | 1272.7158       | 636.8615        | 424.9101        |
|         | 960.3839        | 480.6956        | 320.7995        | 8  | S      | 12 | 1159.6317       | 580.3195        | 387.2154        |
|         | 1031.4210       | 516.2141        | 344.4785        | 9  | A      | 11 | 1072.5997       | 536.8035        | 358.2047        |
|         | 1118.4530       | 559.7302        | 373.4892        | 10 | S      | 10 | 1001.5626       | 501.2849        | 334.5257        |
|         | 1189.4902       | 595.2487        | 397.1682        | 11 | A      | 9  | 914.5305        | 457.7689        | 305.5150        |
|         | 1276.5222       | 638.7647        | 426.1789        | 12 | S      | 8  | 843.4934        | 422.2504        | 281.8360        |
|         | 1333.5436       | 667.2755        | 445.1861        | 13 | G      | 7  | 756.4614        | 378.7343        | 252.8253        |
|         | 1430.5964       | 715.8018        | 477.5370        | 14 | P      | 6  | 699.4399        | 350.2236        | 233.8182        |
|         | 1543.6805       | 772.3439        | 515.2317        | 15 | L      | 5  | 602.3872        | 301.6972        | 201.4672        |
|         | 1644.7281       | 822.8677        | 548.9142        | 16 | T      | 4  | 489.3031        | 245.1552        | 163.7726        |
|         | 1757.8122       | 879.4097        | 586.6089        | 17 | L      | 3  | 388.2554        | 194.6314        | 130.0900        |
|         | 1885.8708       | 943.4390        | 629.2951        | 18 | Q      | 2  | 275.1714        | 138.0893        | 92.3953         |
|         |                 |                 |                 | 19 | K      | 1  | 147.1128        | 74.0600         | 49.7091         |

# Annotated spectra from Saleem et. al. 2009

K.SSLESPT<sub>181</sub>MLK<sub>136</sub>.L/2

0.9887

1e+04

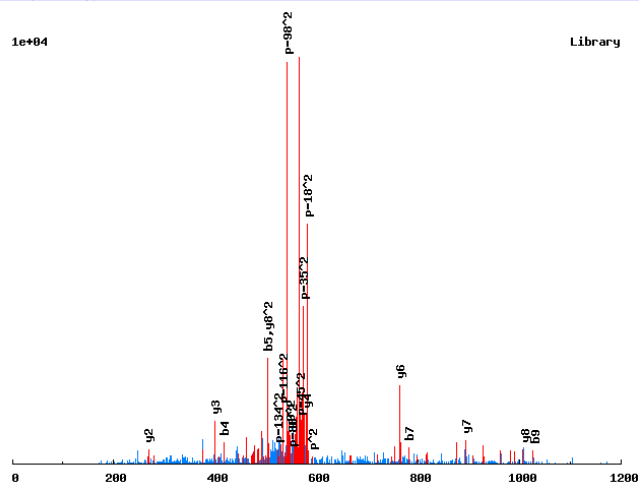

| Library | b <sup>1+</sup> | b <sup>2+</sup> | #  | AA     | #  | y <sup>1+</sup> | y <sup>2+</sup> |
|---------|-----------------|-----------------|----|--------|----|-----------------|-----------------|
|         | 88.0393         | 44.5233         | 1  | S      | 10 |                 |                 |
|         | 175.0713        | 88.0393         | 2  | S      | 9  | 1093.5090       | 547.2582        |
|         | 288.1554        | 144.5813        | 3  | L      | 8  | 1006.4770       | 503.7421        |
|         | 417.1980        | 209.1026        | 4  | E      | 7  | 893.3929        | 447.2001        |
|         | 504.2300        | 252.6186        | 5  | S      | 6  | 764.3504        | 382.6788        |
|         | 601.2828        | 301.1450        | 6  | P      | 5  | 677.3183        | 339.1628        |
|         | 782.2968        | 391.6520        | 7  | T[181] | 4  | 580.2656        | 290.6364        |
|         | 913.3373        | 457.1723        | 8  | M      | 3  | 399.2515        | 200.1294        |
|         | 1026.4213       | 513.7143        | 9  | L      | 2  | 268.2111        | 134.6092        |
|         |                 |                 | 10 | K[136] | 1  | 155.1270        | 78.0671         |

# Annotated spectra from Saleem et. al. 2009

R.SS<sub>167</sub>L.NEDSLYPK<sub>136</sub>PR<sub>166</sub>N/3

0.9987

1e+04

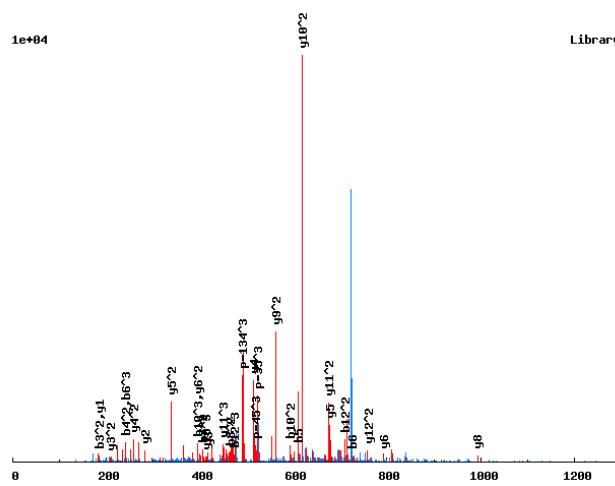

| Library | b <sup>1+</sup> | b <sup>2+</sup> | b <sup>3+</sup> | #  | AA     | #  | y <sup>1+</sup> | y <sup>2+</sup> | y <sup>3+</sup> |
|---------|-----------------|-----------------|-----------------|----|--------|----|-----------------|-----------------|-----------------|
|         | 88.0393         | 44.5233         | 30.0180         | 1  | S      | 13 |                 |                 |                 |
|         | 255.0377        | 128.0225        | 85.6841         | 2  | S[167] | 12 | 1516.7162       | 758.8617        | 506.2436        |
|         | 368.1217        | 184.5645        | 123.3788        | 3  | L      | 11 | 1349.7178       | 675.3626        | 450.5775        |
|         | 482.1647        | 241.5860        | 161.3931        | 4  | N      | 10 | 1236.6338       | 618.8205        | 412.8828        |
|         | 611.2073        | 306.1073        | 204.4073        | 5  | E      | 9  | 1122.5908       | 561.7991        | 374.8685        |
|         | 726.2342        | 363.6207        | 242.7496        | 6  | D      | 8  | 993.5483        | 497.2778        | 331.8543        |
|         | 813.2662        | 407.1368        | 271.7603        | 7  | S      | 7  | 878.5213        | 439.7643        | 293.5120        |
|         | 926.3503        | 463.6788        | 309.4549        | 8  | L      | 6  | 791.4893        | 396.2483        | 264.5013        |
|         | 1089.4136       | 545.2104        | 363.8094        | 9  | Y      | 5  | 678.4052        | 339.7063        | 226.8066        |
|         | 1186.4664       | 593.7368        | 396.1603        | 10 | P      | 4  | 515.3419        | 258.1746        | 172.4522        |
|         | 1322.5755       | 661.7914        | 441.5300        | 11 | K[136] | 3  | 418.2891        | 209.6482        | 140.1012        |
|         | 1419.6283       | 710.3178        | 473.8809        | 12 | P      | 2  | 282.1800        | 141.5936        | 94.7315         |
|         |                 |                 |                 | 13 | R[166] | 1  | 185.1272        | 93.0672         | 62.3806         |

# Annotated spectra from Saleem et. al. 2009

R.SS<sub>167</sub>LNLNTTSPHEASGR.G/3

0.9778

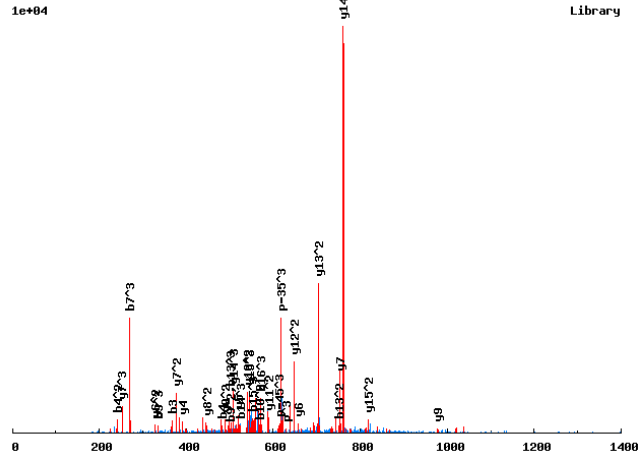

| Library | b <sup>1+</sup> | b <sup>2+</sup> | b <sup>3+</sup> | #  | AA      | #  | y <sup>1+</sup> | y <sup>2+</sup> | y <sup>3+</sup> |
|---------|-----------------|-----------------|-----------------|----|---------|----|-----------------|-----------------|-----------------|
|         | 88.0393         | 44.5233         | 30.0180         | 1  | S       | 17 |                 |                 |                 |
|         | 255.0377        | 128.0225        | 85.6841         | 2  | S [167] | 16 | 1800.8025       | 900.9049        | 600.9390        |
|         | 368.1217        | 184.5645        | 123.3788        | 3  | L       | 15 | 1633.8041       | 817.4057        | 545.2729        |
|         | 482.1647        | 241.5860        | 161.3931        | 4  | N       | 14 | 1520.7200       | 760.8637        | 507.5782        |
|         | 595.2487        | 298.1280        | 199.0878        | 5  | L       | 13 | 1406.6771       | 703.8422        | 469.5639        |
|         | 709.2917        | 355.1495        | 237.1021        | 6  | N       | 12 | 1293.5930       | 647.3002        | 431.8692        |
|         | 810.3393        | 405.6733        | 270.7846        | 7  | T       | 11 | 1179.5501       | 590.2787        | 393.8549        |
|         | 911.3870        | 456.1971        | 304.4672        | 8  | T       | 10 | 1078.5024       | 539.7549        | 360.1723        |
|         | 998.4190        | 499.7132        | 333.4779        | 9  | S       | 9  | 977.4547        | 489.2310        | 326.4898        |
|         | 1135.4780       | 568.2426        | 379.1642        | 10 | H       | 8  | 890.4227        | 445.7150        | 297.4791        |
|         | 1232.5307       | 616.7690        | 411.5151        | 11 | P       | 7  | 753.3638        | 377.1855        | 251.7928        |
|         | 1369.5896       | 685.2985        | 457.2014        | 12 | H       | 6  | 656.3111        | 328.6592        | 219.4419        |
|         | 1498.6322       | 749.8197        | 500.2156        | 13 | E       | 5  | 519.2521        | 260.1297        | 173.7556        |
|         | 1569.6693       | 785.3383        | 523.8946        | 14 | A       | 4  | 390.2095        | 195.6084        | 130.7414        |
|         | 1656.7014       | 828.8543        | 552.9053        | 15 | S       | 3  | 319.1724        | 160.0899        | 107.0623        |
|         | 1713.7228       | 857.3650        | 571.9125        | 16 | G       | 2  | 232.1404        | 116.5738        | 78.0517         |
|         |                 |                 |                 | 17 | R       | 1  | 175.1190        | 88.0631         | 59.0445         |

Annotated spectra from Saleem et. al. 2009

R.S<sub>167</sub>SLSS<sub>167</sub>LSNQR<sub>166</sub>C/2

0.994

1e+04

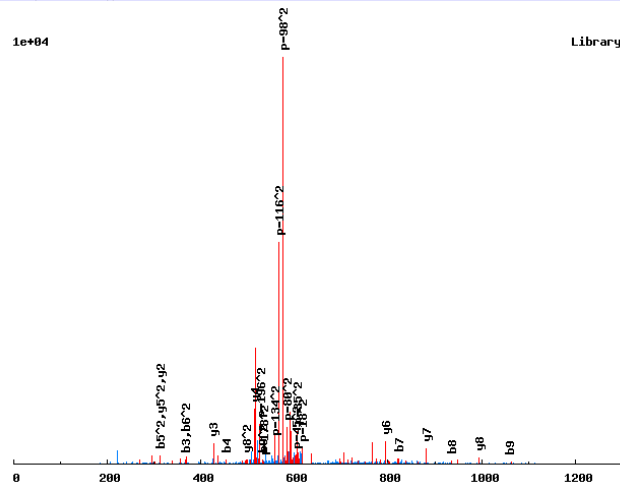

| Library | b <sup>1+</sup>  | b <sup>2+</sup> | #  | AA | #     | y <sup>1+</sup> | y <sup>2+</sup>          |
|---------|------------------|-----------------|----|----|-------|-----------------|--------------------------|
|         | 168.0056         | 84.5065         | 1  | S  | [167] | 10              |                          |
|         | 255.0377         | 128.0225        | 2  | S  |       | 9               | 1081.4913 541.2493       |
|         | <b>368.1217</b>  | 184.5645        | 3  | L  | 8     | <b>994.4593</b> | <b>497.7333</b>          |
|         | <b>455.1538</b>  | 228.0805        | 4  | S  | 7     | <b>881.3752</b> | 441.1912                 |
|         | 622.1521         | <b>311.5797</b> | 5  | S  | [167] | 6               | <b>794.3432</b> 397.6752 |
|         | 735.2362         | <b>368.1217</b> | 6  | L  | 5     | 627.3448        | <b>314.1760</b>          |
|         | <b>822.2682</b>  | 411.6377        | 7  | S  | 4     | <b>514.2608</b> | 257.6340                 |
|         | <b>936.3111</b>  | 468.6592        | 8  | N  | 3     | <b>427.2287</b> | 214.1180                 |
|         | <b>1064.3697</b> | <b>532.6885</b> | 9  | Q  | 2     | <b>313.1858</b> | 157.0965                 |
|         |                  |                 | 10 | R  | [166] | 1               | 185.1272 93.0672         |

# Annotated spectra from Saleem et. al. 2009

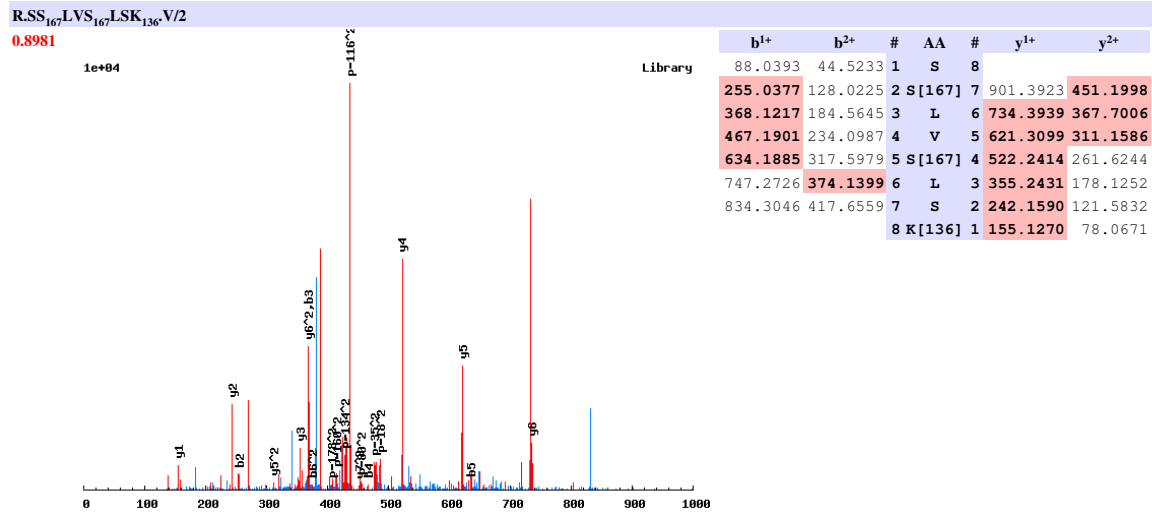

### Annotated spectra from Saleem et. al. 2009

K.SSMQIDNAPT<sub>181</sub>PHNT<sub>181</sub>PASVLNPSYLK.N/3

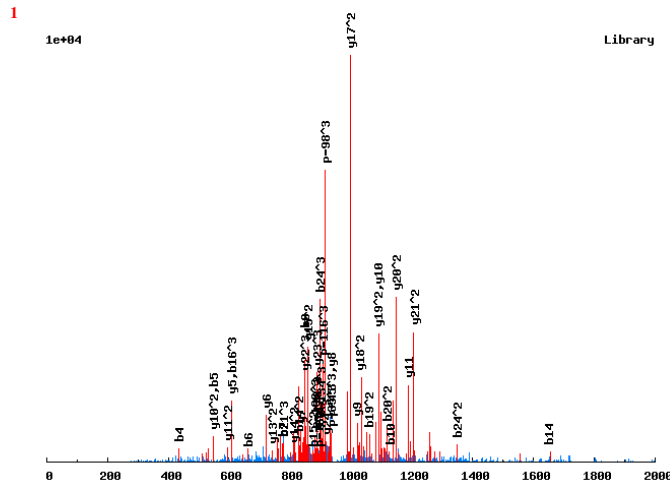

| Library | b <sup>1+</sup>  | b <sup>2+</sup>  | b <sup>3+</sup> | #  | AA     | #  | y <sup>1+</sup>  | y <sup>2+</sup>  | y <sup>3+</sup> |
|---------|------------------|------------------|-----------------|----|--------|----|------------------|------------------|-----------------|
| Library | 88.0393          | 44.5233          | 30.0180         | 1  | S      | 25 |                  |                  |                 |
| Library | 175.0713         | 88.0393          | 59.0286         | 2  | S      | 24 | 2755.2198        | 1378.1135        | <b>919.0781</b> |
| Library | 306.1118         | 153.5596         | 102.7088        | 3  | M      | 23 | 2668.1878        | 1334.5975        | <b>890.0674</b> |
| Library | <b>434.1704</b>  | 217.5888         | 145.3950        | 4  | Q      | 22 | 2537.1473        | 1269.0773        | <b>846.3873</b> |
| Library | <b>547.2545</b>  | 274.1309         | 183.0897        | 5  | I      | 21 | 2409.0887        | <b>1205.0480</b> | 803.7011        |
| Library | <b>662.2814</b>  | 331.6443         | 221.4320        | 6  | D      | 20 | 2296.0046        | <b>1148.5060</b> | 766.0064        |
| Library | <b>776.3243</b>  | 388.6658         | 259.4463        | 7  | N      | 19 | 2180.9777        | <b>1090.9925</b> | 727.6641        |
| Library | <b>847.3614</b>  | 424.1844         | 283.1253        | 8  | A      | 18 | 2066.9348        | <b>1033.9710</b> | 689.6498        |
| Library | 944.4142         | 472.7107         | 315.4763        | 9  | P      | 17 | 1995.8977        | <b>998.4525</b>  | 665.9707        |
| Library | <b>1125.4282</b> | 563.2178         | 375.8143        | 10 | T[181] | 16 | 1898.8449        | 949.9261         | 633.6198        |
| Library | 1222.4810        | 611.7441         | 408.1652        | 11 | P      | 15 | 1717.8309        | <b>859.4191</b>  | 573.2818        |
| Library | 1359.5399        | 680.2736         | 453.8515        | 12 | H      | 14 | 1620.7781        | <b>810.8927</b>  | 540.9309        |
| Library | 1473.5828        | 737.2951         | 491.8658        | 13 | N      | 13 | 1483.7192        | <b>742.3633</b>  | 495.2446        |
| Library | <b>1654.5968</b> | <b>827.8021</b>  | 552.2038        | 14 | T[181] | 12 | 1369.6763        | 685.3418         | 457.2303        |
| Library | 1751.6496        | <b>876.3284</b>  | 584.5547        | 15 | P      | 11 | <b>1188.6623</b> | <b>594.8348</b>  | 396.8923        |
| Library | 1822.6867        | 911.8470         | <b>608.2338</b> | 16 | A      | 10 | <b>1091.6095</b> | <b>546.3084</b>  | 364.5414        |
| Library | 1909.7187        | 955.3630         | 637.2444        | 17 | S      | 9  | <b>1020.5724</b> | 510.7898         | 340.8623        |
| Library | 2008.7871        | 1004.8972        | 670.2672        | 18 | V      | 8  | <b>933.5404</b>  | 467.2738         | 311.8516        |
| Library | 2121.8712        | <b>1061.4392</b> | 707.9619        | 19 | L      | 7  | <b>834.4720</b>  | 417.7396         | 278.8288        |
| Library | 2235.9141        | <b>1118.4607</b> | 745.9762        | 20 | N      | 6  | <b>721.3879</b>  | 361.1976         | 241.1342        |
| Library | 2332.9669        | 1166.9871        | <b>778.3272</b> | 21 | P      | 5  | <b>607.3450</b>  | 304.1761         | 203.1198        |
| Library | 2419.9989        | 1210.5031        | 807.3378        | 22 | S      | 4  | 510.2922         | 255.6498         | 170.7689        |
| Library | 2583.0623        | 1292.0348        | 861.6923        | 23 | Y      | 3  | 423.2602         | 212.1337         | 141.7582        |
| Library | 2696.1463        | <b>1348.5768</b> | <b>899.3870</b> | 24 | L      | 2  | 260.1969         | 130.6021         | 87.4038         |
| Library |                  |                  |                 | 25 | K      | 1  | 147.1128         | 74.0600          | 49.7091         |

# Annotated spectra from Saleem et. al. 2009

K.SSMQIDNAPT<sub>181</sub>PHNT<sub>181</sub>PAS<sub>167</sub>VLNPSYLK.N/3

0.9998

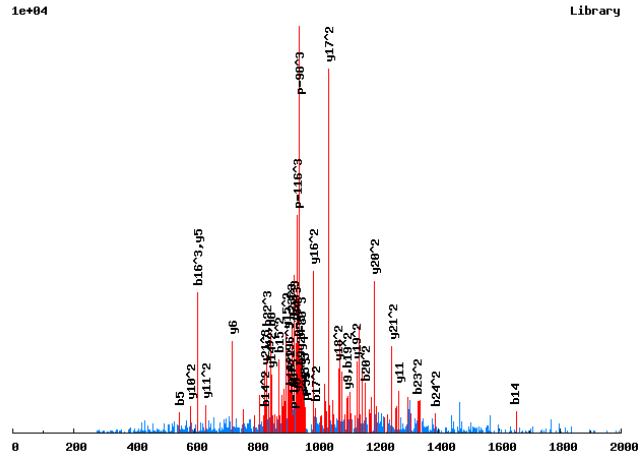

| Library | b <sup>1+</sup> | b <sup>2+</sup> | b <sup>3+</sup> | #  | AA     | #  | y <sup>1+</sup> | y <sup>2+</sup> | y <sup>3+</sup> |
|---------|-----------------|-----------------|-----------------|----|--------|----|-----------------|-----------------|-----------------|
|         | 88.0393         | 44.5233         | 30.0180         | 1  | S      | 25 |                 |                 |                 |
|         | 175.0713        | 88.0393         | 59.0286         | 2  | S      | 24 | 2835.1861       | 1418.0967       | 945.7336        |
|         | 306.1118        | 153.5596        | 102.7088        | 3  | M      | 23 | 2748.1541       | 1374.5807       | 916.7229        |
|         | 434.1704        | 217.5888        | 145.3950        | 4  | Q      | 22 | 2617.1136       | 1309.0604       | 873.0427        |
|         | 547.2545        | 274.1309        | 183.0897        | 5  | I      | 21 | 2489.0550       | 1245.0312       | 830.3565        |
|         | 662.2814        | 331.6443        | 221.4320        | 6  | D      | 20 | 2375.9710       | 1188.4891       | 792.6618        |
|         | 776.3243        | 388.6658        | 259.4463        | 7  | N      | 19 | 2260.9440       | 1130.9757       | 754.3195        |
|         | 847.3614        | 424.1844        | 283.1253        | 8  | A      | 18 | 2146.9011       | 1073.9542       | 716.3052        |
|         | 944.4142        | 472.7107        | 315.4763        | 9  | P      | 17 | 2075.8640       | 1038.4356       | 692.6262        |
|         | 1125.4282       | 563.2178        | 375.8143        | 10 | T[181] | 16 | 1978.8112       | 989.9093        | 660.2753        |
|         | 1222.4810       | 611.7441        | 408.1652        | 11 | P      | 15 | 1797.7972       | 899.4023        | 599.9373        |
|         | 1359.5399       | 680.2736        | 453.8515        | 12 | H      | 14 | 1700.7445       | 850.8759        | 567.5863        |
|         | 1473.5828       | 737.2951        | 491.8658        | 13 | N      | 13 | 1563.6856       | 782.3464        | 521.9000        |
|         | 1654.5968       | 827.8021        | 552.2038        | 14 | T[181] | 12 | 1449.6426       | 725.3250        | 483.8857        |
|         | 1751.6496       | 876.3284        | 584.5547        | 15 | P      | 11 | 1268.6286       | 634.8179        | 423.5477        |
|         | 1822.6867       | 911.8470        | 608.2338        | 16 | A      | 10 | 1171.5759       | 586.2916        | 391.1968        |
|         | 1989.6851       | 995.3462        | 663.8999        | 17 | S[167] | 9  | 1100.5387       | 550.7730        | 367.5178        |
|         | 2088.7535       | 1044.8804       | 696.9227        | 18 | V      | 8  | 933.5404        | 467.2738        | 311.8516        |
|         | 2201.8375       | 1101.4224       | 734.6174        | 19 | L      | 7  | 834.4720        | 417.7396        | 278.8288        |
|         | 2315.8805       | 1158.4439       | 772.6317        | 20 | N      | 6  | 721.3879        | 361.1976        | 241.1342        |
|         | 2412.9332       | 1206.9703       | 804.9826        | 21 | P      | 5  | 607.3450        | 304.1761        | 203.1198        |
|         | 2499.9653       | 1250.4863       | 833.9933        | 22 | S      | 4  | 510.2922        | 255.6498        | 170.7689        |
|         | 2663.0286       | 1332.0179       | 888.3477        | 23 | Y      | 3  | 423.2602        | 212.1337        | 141.7582        |
|         | 2776.1126       | 1388.5600       | 926.0424        | 24 | L      | 2  | 260.1969        | 130.6021        | 87.4038         |
|         |                 |                 |                 | 25 | K      | 1  | 147.1128        | 74.0600         | 49.7091         |



# Annotated spectra from Saleem et. al. 2009

K.SSNY<sub>243</sub>DSSDEES<sub>167</sub>DEEDGKK.V/2

0.9902

1e+04

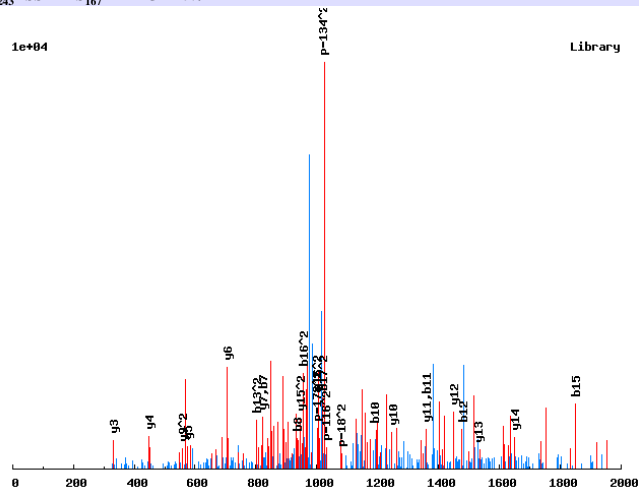

| Library | b <sup>1+</sup>  | b <sup>2+</sup>  | #  | AA     | #  | y <sup>1+</sup>  | y <sup>2+</sup>  |
|---------|------------------|------------------|----|--------|----|------------------|------------------|
|         | 88.0393          | 44.5233          | 1  | S      | 18 |                  |                  |
|         | 175.0713         | 88.0393          | 2  | S      | 17 | 2093.6744        | 1047.3408        |
|         | 289.1143         | 145.0608         | 3  | N      | 16 | 2006.6424        | <b>1003.8248</b> |
|         | 532.1439         | 266.5756         | 4  | Y[243] | 15 | 1892.5994        | <b>946.8034</b>  |
|         | 647.1709         | 324.0891         | 5  | D      | 14 | <b>1649.5698</b> | 825.2885         |
|         | 734.2029         | 367.6051         | 6  | S      | 13 | <b>1534.5428</b> | 767.7751         |
|         | <b>821.2349</b>  | 411.1211         | 7  | S      | 12 | <b>1447.5108</b> | 724.2590         |
|         | <b>936.2619</b>  | 468.6346         | 8  | D      | 11 | <b>1360.4788</b> | 680.7430         |
|         | 1065.3045        | 533.1559         | 9  | E      | 10 | <b>1245.4518</b> | 623.2296         |
|         | <b>1194.3471</b> | 597.6772         | 10 | E      | 9  | 1116.4092        | <b>558.7083</b>  |
|         | <b>1361.3454</b> | 681.1763         | 11 | S[167] | 8  | 987.3666         | 494.1870         |
|         | <b>1476.3724</b> | 738.6898         | 12 | D      | 7  | <b>820.3683</b>  | 410.6878         |
|         | 1605.4149        | <b>803.2111</b>  | 13 | E      | 6  | <b>705.3413</b>  | 353.1743         |
|         | 1734.4575        | 867.7324         | 14 | E      | 5  | <b>576.2988</b>  | 288.6530         |
|         | <b>1849.4845</b> | 925.2459         | 15 | D      | 4  | <b>447.2562</b>  | 224.1317         |
|         | 1906.5059        | <b>953.7566</b>  | 16 | G      | 3  | <b>332.2292</b>  | 166.6182         |
|         | 2034.6009        | <b>1017.8041</b> | 17 | K      | 2  | 275.2078         | 138.1075         |
|         |                  |                  | 18 | K      | 1  | 147.1128         | 74.0600          |

Annotated spectra from Saleem et. al. 2009

K.SSNY<sub>243</sub>DSS<sub>167</sub>DEES<sub>167</sub>DEEDGKK.V/2

0.9363

1e+04

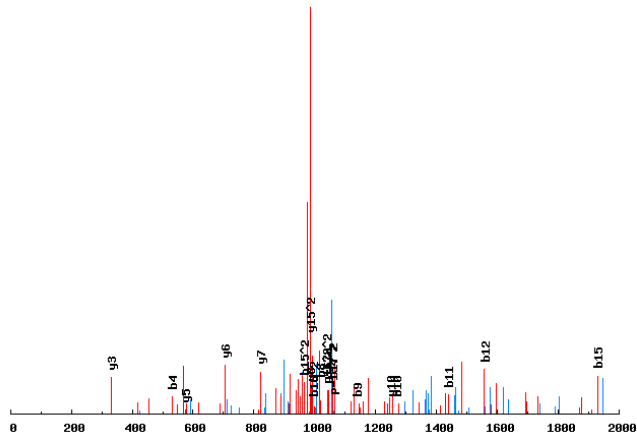

| Library | b <sup>1+</sup> | b <sup>2+</sup> | #  | AA     | #  | y <sup>1+</sup> | y <sup>2+</sup> |
|---------|-----------------|-----------------|----|--------|----|-----------------|-----------------|
|         | 88.0393         | 44.5233         | 1  | S      | 18 |                 |                 |
|         | 175.0713        | 88.0393         | 2  | S      | 17 | 2173.6407       | 1087.3240       |
|         | 289.1143        | 145.0608        | 3  | N      | 16 | 2086.6087       | 1043.8080       |
|         | 532.1439        | 266.5756        | 4  | Y[243] | 15 | 1972.5658       | 986.7865        |
|         | 647.1709        | 324.0891        | 5  | D      | 14 | 1729.5361       | 865.2717        |
|         | 734.2029        | 367.6051        | 6  | S      | 13 | 1614.5092       | 807.7582        |
|         | 901.2013        | 451.1043        | 7  | S[167] | 12 | 1527.4771       | 764.2422        |
|         | 1016.2282       | 508.6177        | 8  | D      | 11 | 1360.4788       | 680.7430        |
|         | 1145.2708       | 573.1390        | 9  | E      | 10 | 1245.4518       | 623.2296        |
|         | 1274.3134       | 637.6603        | 10 | E      | 9  | 1116.4092       | 558.7083        |
|         | 1441.3117       | 721.1595        | 11 | S[167] | 8  | 987.3666        | 494.1870        |
|         | 1556.3387       | 778.6730        | 12 | D      | 7  | 820.3683        | 410.6878        |
|         | 1685.3813       | 843.1943        | 13 | E      | 6  | 705.3413        | 353.1743        |
|         | 1814.4239       | 907.7156        | 14 | E      | 5  | 576.2988        | 288.6530        |
|         | 1929.4508       | 965.2290        | 15 | D      | 4  | 447.2562        | 224.1317        |
|         | 1986.4723       | 993.7398        | 16 | G      | 3  | 332.2292        | 166.6182        |
|         | 2114.5672       | 1057.7873       | 17 | K      | 2  | 275.2078        | 138.1075        |
|         |                 |                 | 18 | K      | 1  | 147.1128        | 74.0600         |

# Annotated spectra from Saleem et. al. 2009

R.SS<sub>167</sub>QTS<sub>167</sub>LPSQLENK.D/2

0.9995

1e+04

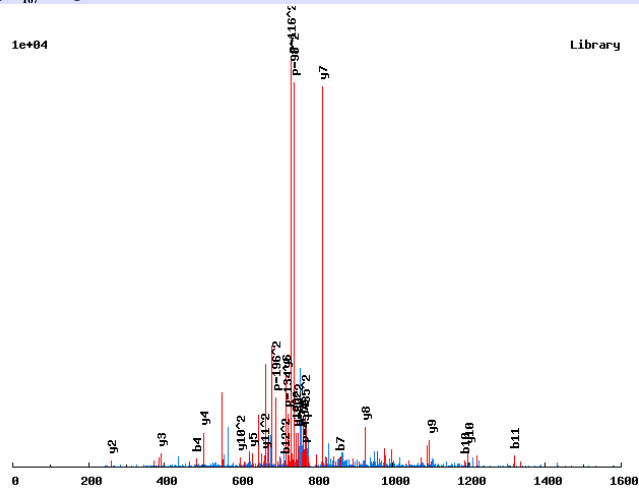

| Library | b <sup>1+</sup> | b <sup>2+</sup> | #  | AA     | #  | y <sup>1+</sup> | y <sup>2+</sup> |
|---------|-----------------|-----------------|----|--------|----|-----------------|-----------------|
|         | 88.0393         | 44.5233         | 1  | S      | 13 |                 |                 |
|         | 255.0377        | 128.0225        | 2  | S[167] | 12 | 1491.6128       | 746.3100        |
|         | 383.0963        | 192.0518        | 3  | Q      | 11 | 1324.6144       | 662.8109        |
|         | 484.1439        | 242.5756        | 4  | T      | 10 | 1196.5559       | 598.7816        |
|         | 651.1423        | 326.0748        | 5  | S[167] | 9  | 1095.5082       | 548.2577        |
|         | 764.2264        | 382.6168        | 6  | L      | 8  | 928.5098        | 464.7585        |
|         | 861.2791        | 431.1432        | 7  | P      | 7  | 815.4258        | 408.2165        |
|         | 948.3111        | 474.6592        | 8  | S      | 6  | 718.3730        | 359.6901        |
|         | 1076.3697       | 538.6885        | 9  | Q      | 5  | 631.3410        | 316.1741        |
|         | 1189.4538       | 595.2305        | 10 | L      | 4  | 503.2824        | 252.1448        |
|         | 1318.4964       | 659.7518        | 11 | E      | 3  | 390.1983        | 195.6028        |
|         | 1432.5393       | 716.7733        | 12 | N      | 2  | 261.1557        | 131.0815        |
|         |                 |                 | 13 | K      | 1  | 147.1128        | 74.0600         |

# Annotated spectra from Saleem et. al. 2009

R.SS<sub>167</sub>R<sub>166</sub>T<sub>181</sub>NSAISQS<sub>167</sub>PVNYAFP<sub>136</sub>NYK<sub>136</sub>I/3

0.7859

1e+04

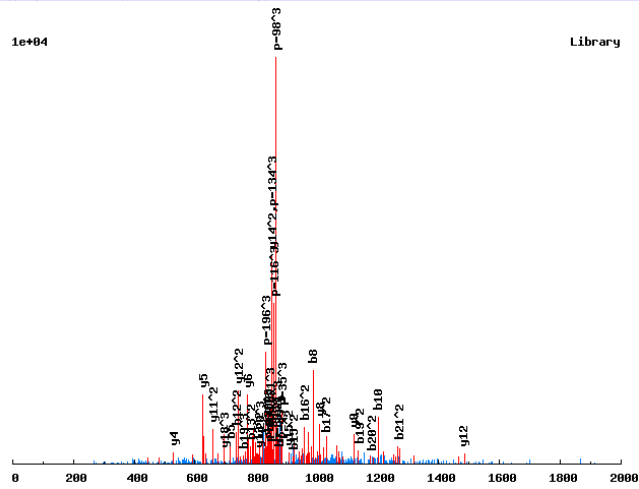

| Library | b <sup>1+</sup> | b <sup>2+</sup> | b <sup>3+</sup> | #  | AA     | #  | y <sup>1+</sup> | y <sup>2+</sup> | y <sup>3+</sup> |
|---------|-----------------|-----------------|-----------------|----|--------|----|-----------------|-----------------|-----------------|
|         | 88.0393         | 44.5233         | 30.0180         | 1  | S      | 22 |                 |                 |                 |
|         | 255.0377        | 128.0225        | 85.6841         | 2  | S[167] | 21 | 2599.0786       | 1300.0429       | 867.0310        |
|         | 421.1470        | 211.0772        | 141.0539        | 3  | R[166] | 20 | 2432.0802       | 1216.5438       | 811.3649        |
|         | 602.1611        | 301.5842        | 201.3919        | 4  | T[181] | 19 | 2265.9708       | 1133.4891       | 755.9951        |
|         | 716.2040        | 358.6056        | 239.4062        | 5  | N      | 18 | 2084.9568       | 1042.9821       | 695.6571        |
|         | 803.2360        | 402.1217        | 268.4169        | 6  | S      | 17 | 1970.9139       | 985.9606        | 657.6428        |
|         | 874.2731        | 437.6402        | 292.0959        | 7  | A      | 16 | 1883.8819       | 942.4446        | 628.6321        |
|         | 987.3572        | 494.1822        | 329.7906        | 8  | I      | 15 | 1812.8448       | 906.9260        | 604.9531        |
|         | 1074.3892       | 537.6983        | 358.8013        | 9  | S      | 14 | 1699.7607       | 850.3840        | 567.2584        |
|         | 1202.4478       | 601.7275        | 401.4875        | 10 | Q      | 13 | 1612.7287       | 806.8680        | 538.2477        |
|         | 1369.4462       | 685.2267        | 457.1536        | 11 | S[167] | 12 | 1484.6701       | 742.8387        | 495.5615        |
|         | 1466.4989       | 733.7531        | 489.5045        | 12 | P      | 11 | 1317.6717       | 659.3395        | 439.8954        |
|         | 1565.5673       | 783.2873        | 522.5273        | 13 | V      | 10 | 1220.6190       | 610.8131        | 407.5445        |
|         | 1679.6103       | 840.3088        | 560.5416        | 14 | N      | 9  | 1121.5506       | 561.2789        | 374.5217        |
|         | 1842.6736       | 921.8404        | 614.8961        | 15 | Y      | 8  | 1007.5076       | 504.2575        | 336.5074        |
|         | 1913.7107       | 957.3590        | 638.5751        | 16 | A      | 7  | 844.4443        | 422.7258        | 282.1530        |
|         | 2060.7791       | 1030.8932       | 687.5979        | 17 | F      | 6  | 773.4072        | 387.2072        | 258.4739        |
|         | 2157.8319       | 1079.4196       | 719.9488        | 18 | P      | 5  | 626.3388        | 313.6730        | 209.4511        |
|         | 2271.8748       | 1136.4410       | 757.9631        | 19 | N      | 4  | 529.2860        | 265.1466        | 177.1002        |
|         | 2368.9276       | 1184.9674       | 790.3140        | 20 | P      | 3  | 415.2431        | 208.1252        | 139.0859        |
|         | 2531.9909       | 1266.4991       | 844.6685        | 21 | Y      | 2  | 318.1903        | 159.5988        | 106.7350        |
|         |                 |                 |                 | 22 | K[136] | 1  | 155.1270        | 78.0671         | 52.3805         |

# Annotated spectra from Saleem et. al. 2009

K.SS<sub>167</sub>SFAHLQAPS<sub>167</sub>PIPDPLQVSKPETR.M/3

0.9872

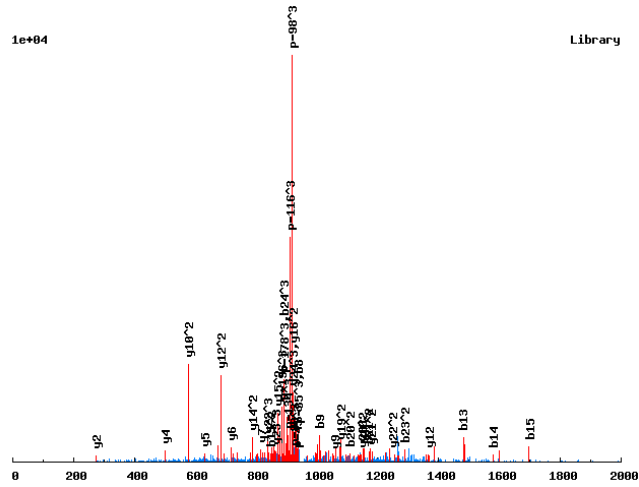

| Library | b <sup>1+</sup> | b <sup>2+</sup> | b <sup>3+</sup> | #  | AA     | #  | y <sup>1+</sup> | y <sup>2+</sup> | y <sup>3+</sup> |
|---------|-----------------|-----------------|-----------------|----|--------|----|-----------------|-----------------|-----------------|
|         | 88.0393         | 44.5233         | 30.0180         | 1  | S      | 25 |                 |                 |                 |
|         | 255.0377        | 128.0225        | 85.6841         | 2  | S[167] | 24 | 2762.2950       | 1381.6511       | 921.4365        |
|         | 342.0697        | 171.5385        | 114.6948        | 3  | S      | 23 | 2595.2966       | 1298.1520       | 865.7704        |
|         | 489.1381        | 245.0727        | 163.7176        | 4  | F      | 22 | 2508.2646       | 1254.6359       | 836.7597        |
|         | 560.1752        | 280.5913        | 187.3966        | 5  | A      | 21 | 2361.1962       | 1181.1017       | 787.7369        |
|         | 697.2341        | 349.1207        | 233.0829        | 6  | H      | 20 | 2290.1591       | 1145.5832       | 764.0579        |
|         | 810.3182        | 405.6627        | 270.7776        | 7  | L      | 19 | 2153.1002       | 1077.0537       | 718.3716        |
|         | 938.3768        | 469.6920        | 313.4638        | 8  | Q      | 18 | 2040.0161       | 1020.5117       | 680.6769        |
|         | 1009.4139       | 505.2106        | 337.1428        | 9  | A      | 17 | 1911.9575       | 956.4824        | 637.9907        |
|         | 1106.4666       | 553.7370        | 369.4937        | 10 | P      | 16 | 1840.9204       | 920.9639        | 614.3117        |
|         | 1273.4650       | 637.2361        | 425.1599        | 11 | S[167] | 15 | 1743.8677       | 872.4375        | 581.9607        |
|         | 1370.5178       | 685.7625        | 457.5108        | 12 | P      | 14 | 1576.8693       | 788.9383        | 526.2946        |
|         | 1483.6018       | 742.3046        | 495.2055        | 13 | I      | 13 | 1479.8165       | 740.4119        | 493.9437        |
|         | 1580.6546       | 790.8309        | 527.5564        | 14 | P      | 12 | 1366.7325       | 683.8699        | 456.2490        |
|         | 1695.6815       | 848.3444        | 565.8987        | 15 | D      | 11 | 1269.6797       | 635.3435        | 423.8981        |
|         | 1792.7343       | 896.8708        | 598.2496        | 16 | P      | 10 | 1154.6528       | 577.8300        | 385.5558        |
|         | 1905.8183       | 953.4128        | 635.9443        | 17 | L      | 9  | 1057.6000       | 529.3037        | 353.2049        |
|         | 2033.8769       | 1017.4421       | 678.6305        | 18 | Q      | 8  | 944.5160        | 472.7616        | 315.5102        |
|         | 2132.9453       | 1066.9763       | 711.6533        | 19 | V      | 7  | 816.4574        | 408.7323        | 272.8240        |
|         | 2219.9774       | 1110.4923       | 740.6640        | 20 | S      | 6  | 717.3890        | 359.1981        | 239.8012        |
|         | 2348.0723       | 1174.5398       | 783.3623        | 21 | K      | 5  | 630.3569        | 315.6821        | 210.7905        |
|         | 2445.1251       | 1223.0662       | 815.7132        | 22 | P      | 4  | 502.2620        | 251.6346        | 168.0922        |
|         | 2574.1677       | 1287.5875       | 858.7274        | 23 | E      | 3  | 405.2092        | 203.1082        | 135.7413        |
|         | 2675.2154       | 1338.1113       | 892.4100        | 24 | T      | 2  | 276.1666        | 138.5870        | 92.7271         |
|         |                 |                 |                 | 25 | R      | 1  | 175.1190        | 88.0631         | 59.0445         |

# Annotated spectra from Saleem et. al. 2009

R.SS<sub>167</sub>S<sub>167</sub>FLR.H/2

0.8222

1e+04

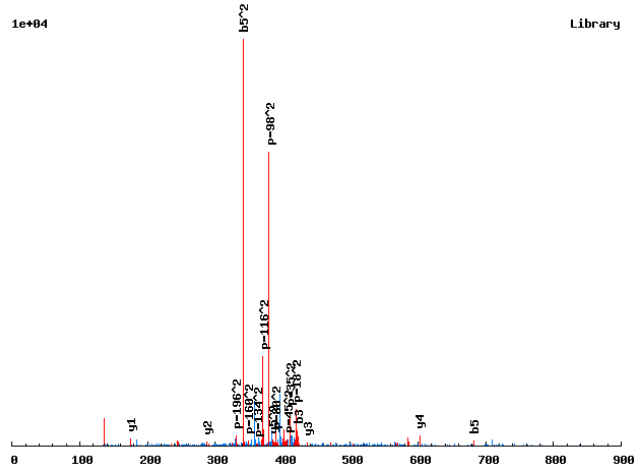

| Library | b <sup>1+</sup> | b <sup>2+</sup> | # | AA     | # | y <sup>1+</sup> | y <sup>2+</sup> |
|---------|-----------------|-----------------|---|--------|---|-----------------|-----------------|
|         | 88.0393         | 44.5233         | 1 | S      | 6 |                 |                 |
|         | 255.0377        | 128.0225        | 2 | S[167] | 5 | 769.2681        | 385.1377        |
|         | 422.0360        | 211.5217        | 3 | S[167] | 4 | 602.2698        | 301.6385        |
|         | 569.1044        | 285.0559        | 4 | F      | 3 | 435.2714        | 218.1393        |
|         | 682.1885        | 341.5979        | 5 | L      | 2 | 288.2030        | 144.6051        |
|         |                 |                 | 6 | R      | 1 | 175.1190        | 88.0631         |

# Annotated spectra from Saleem et. al. 2009

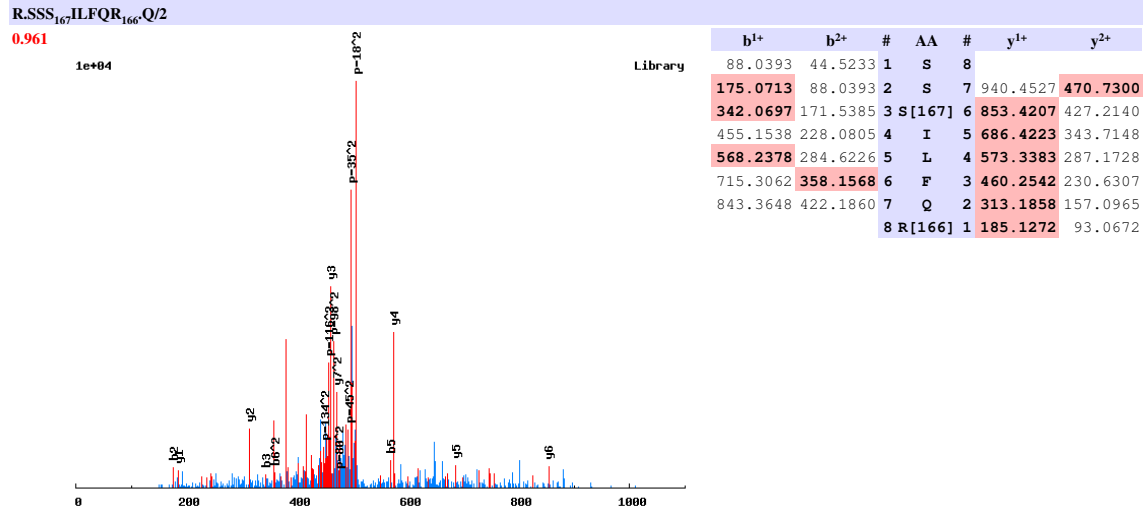

# Annotated spectra from Saleem et. al. 2009

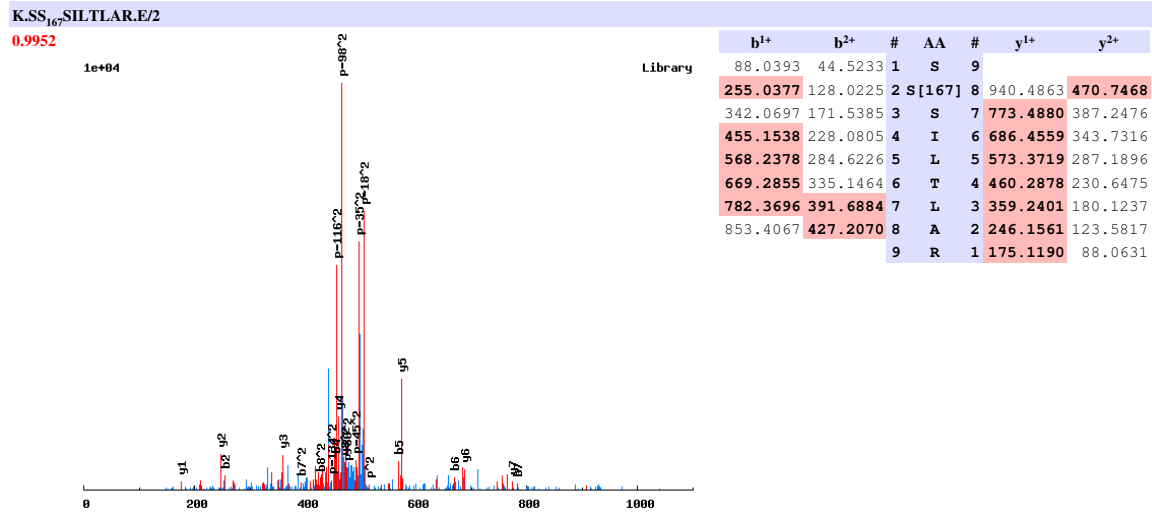



# Annotated spectra from Saleem et. al. 2009

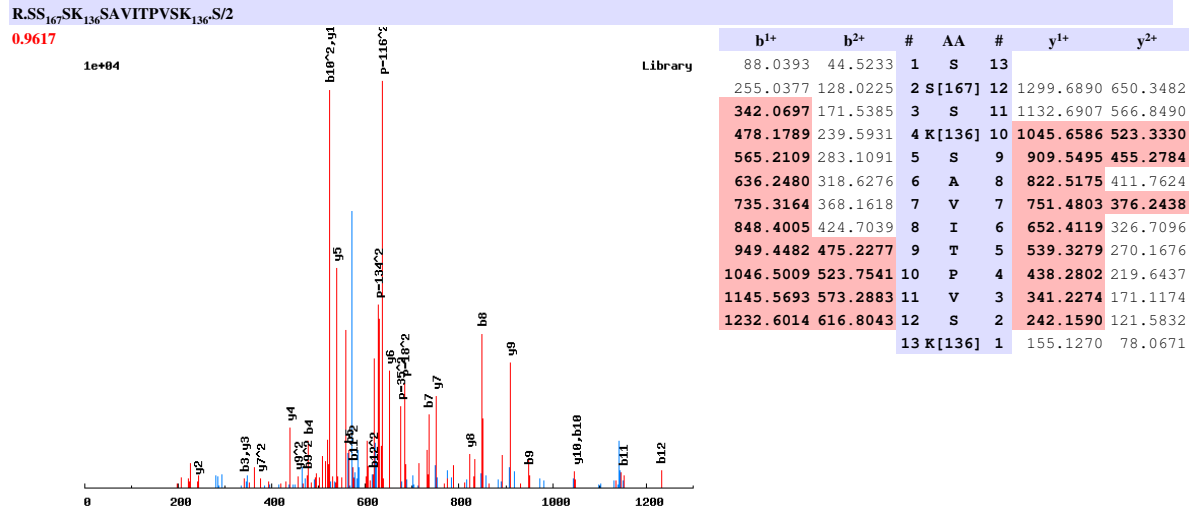

# Annotated spectra from Saleem et. al. 2009

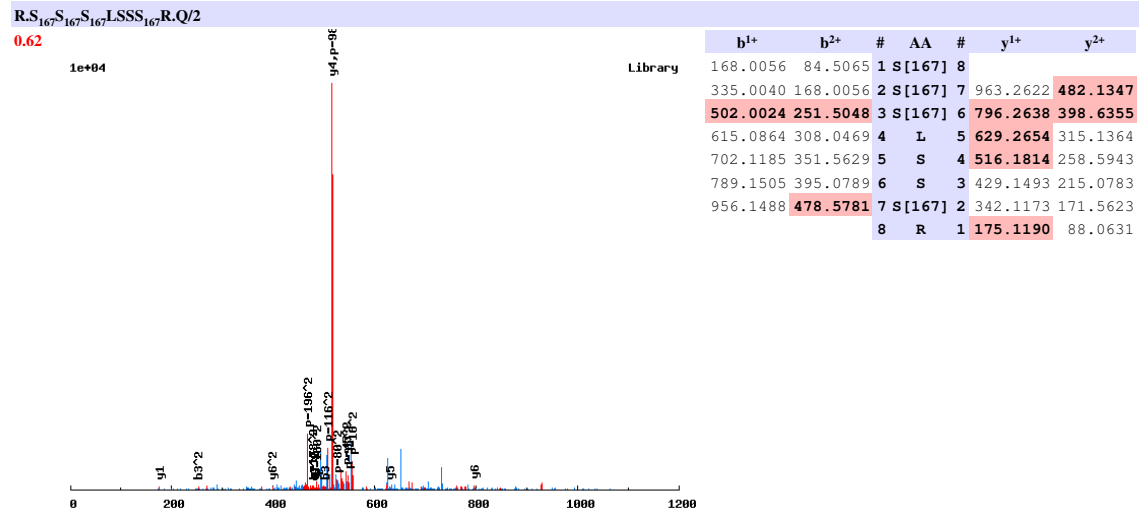

# Annotated spectra from Saleem et. al. 2009

R.SSS<sub>167</sub>NLS<sub>167</sub>LDSLK.M/2

0.9715

1e+04

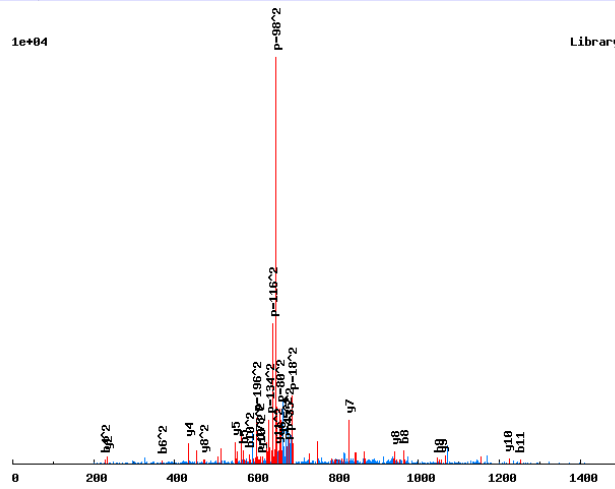

| Library | b <sup>1+</sup> | b <sup>2+</sup> | #  | AA     | #  | y <sup>1+</sup> | y <sup>2+</sup> |
|---------|-----------------|-----------------|----|--------|----|-----------------|-----------------|
|         | 88.0393         | 44.5233         | 1  | S      | 12 |                 |                 |
|         | 175.0713        | 88.0393         | 2  | S      | 11 | 1310.5277       | 655.7675        |
|         | 342.0697        | 171.5385        | 3  | S[167] | 10 | 1223.4956       | 612.2515        |
|         | 456.1126        | 228.5600        | 4  | N      | 9  | 1056.4973       | 528.7523        |
|         | 569.1967        | 285.1020        | 5  | L      | 8  | 942.4543        | 471.7308        |
|         | 736.1951        | 368.6012        | 6  | S[167] | 7  | 829.3703        | 415.1888        |
|         | 849.2791        | 425.1432        | 7  | L      | 6  | 662.3719        | 331.6896        |
|         | 964.3061        | 482.6567        | 8  | D      | 5  | 549.2879        | 275.1476        |
|         | 1051.3381       | 526.1727        | 9  | S      | 4  | 434.2609        | 217.6341        |
|         | 1164.4221       | 582.7147        | 10 | L      | 3  | 347.2289        | 174.1181        |
|         | 1251.4542       | 626.2307        | 11 | S      | 2  | 234.1448        | 117.5761        |
|         |                 |                 | 12 | K      | 1  | 147.1128        | 74.0600         |

# Annotated spectra from Saleem et. al. 2009

R.S<sub>167</sub>S<sub>167</sub>-SPEENPITSM<sub>147</sub>PSEK.N/2

0.9669

1e+04

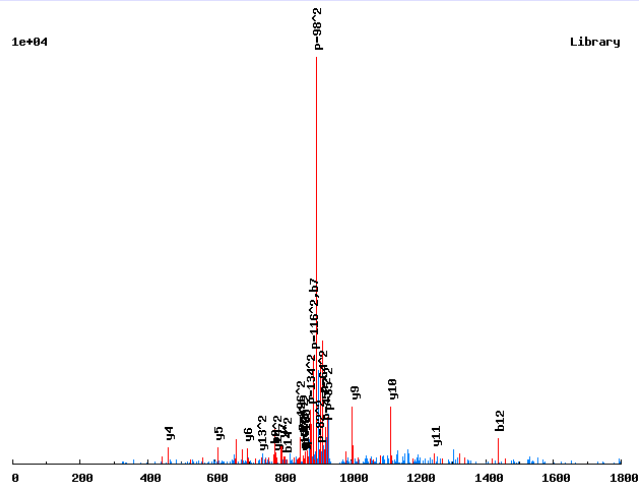

| Library | b <sup>1+</sup> | b <sup>2+</sup> | #  | AA | #     | y <sup>1+</sup> | y <sup>2+</sup>    |
|---------|-----------------|-----------------|----|----|-------|-----------------|--------------------|
|         | 168.0056        | 84.5065         | 1  | S  | [167] | 16              |                    |
|         | 335.0040        | 168.0056        | 2  | S  | [167] | 15              | 1728.7034 864.8553 |
|         | 422.0360        | 211.5217        | 3  | S  | 14    | 1561.7050       | 781.3561           |
|         | 519.0888        | 260.0480        | 4  | P  | 13    | 1474.6730       | 737.8401           |
|         | 648.1314        | 324.5693        | 5  | E  | 12    | 1377.6202       | 689.3138           |
|         | 777.1740        | 389.0906        | 6  | E  | 11    | 1248.5776       | 624.7925           |
|         | 891.2169        | 446.1121        | 7  | N  | 10    | 1119.5350       | 560.2712           |
|         | 988.2697        | 494.6385        | 8  | P  | 9     | 1005.4921       | 503.2497           |
|         | 1101.3537       | 551.1805        | 9  | I  | 8     | 908.4394        | 454.7233           |
|         | 1202.4014       | 601.7043        | 10 | T  | 7     | 795.3553        | 398.1813           |
|         | 1289.4334       | 645.2204        | 11 | S  | 6     | 694.3076        | 347.6574           |
|         | 1436.4688       | 718.7381        | 12 | M  | [147] | 5               | 607.2756 304.1414  |
|         | 1533.5216       | 767.2644        | 13 | P  | 4     | 460.2402        | 230.6237           |
|         | 1620.5536       | 810.7805        | 14 | S  | 3     | 363.1874        | 182.0973           |
|         | 1749.5962       | 875.3017        | 15 | E  | 2     | 276.1554        | 138.5813           |
|         |                 |                 | 16 | K  | 1     | 147.1128        | 74.0600            |

# Annotated spectra from Saleem et. al. 2009

R.S<sub>167</sub>S<sub>167</sub>S<sub>167</sub>PS<sub>167</sub>Y<sub>243</sub>S<sub>167</sub>QFK.T/2

0.6924

1e+04

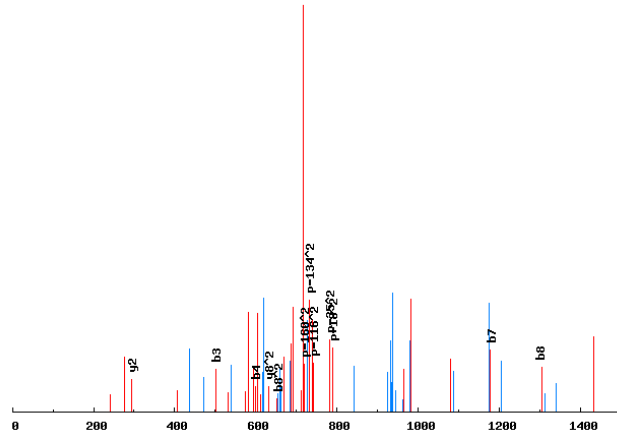

| Library | b <sup>1+</sup> | b <sup>2+</sup> | #  | AA     | #  | y <sup>1+</sup> | y <sup>2+</sup> |
|---------|-----------------|-----------------|----|--------|----|-----------------|-----------------|
|         | 168.0056        | 84.5065         | 1  | S[167] | 10 |                 |                 |
|         | 335.0040        | 168.0056        | 2  | S[167] | 9  | 1430.3157       | 715.6615        |
|         | 502.0024        | 251.5048        | 3  | S[167] | 8  | 1263.3173       | 632.1623        |
|         | 599.0551        | 300.0312        | 4  | P      | 7  | 1096.3189       | 548.6631        |
|         | 766.0535        | 383.5304        | 5  | S[167] | 6  | 999.2662        | 500.1367        |
|         | 1009.0831       | 505.0452        | 6  | Y[243] | 5  | 832.2678        | 416.6375        |
|         | 1176.0815       | 588.5444        | 7  | S[167] | 4  | 589.2382        | 295.1227        |
|         | 1304.1401       | 652.5737        | 8  | Q      | 3  | 422.2398        | 211.6235        |
|         | 1451.2085       | 726.1079        | 9  | F      | 2  | 294.1812        | 147.5942        |
|         |                 |                 | 10 | K      | 1  | 147.1128        | 74.0600         |

# Annotated spectra from Saleem et. al. 2009

R.SS<sub>167</sub>S<sub>167</sub>QLDQLNSC<sub>160</sub>SSVTDPKRS/3

0.7548

1e+04

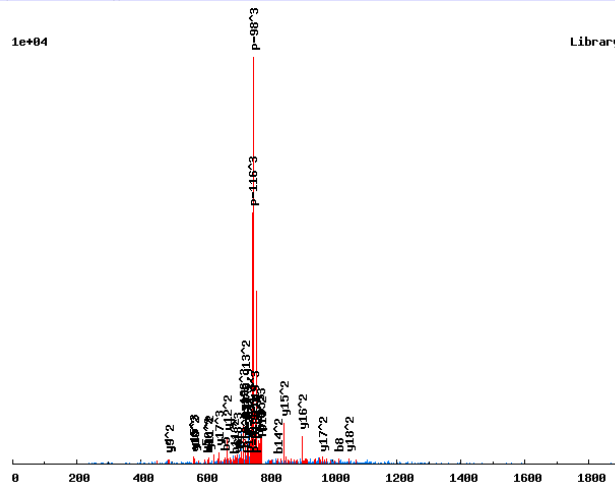

| Library | b <sup>1+</sup> | b <sup>2+</sup> | b <sup>3+</sup> | #  | AA     | #  | y <sup>1+</sup> | y <sup>2+</sup> | y <sup>3+</sup> |
|---------|-----------------|-----------------|-----------------|----|--------|----|-----------------|-----------------|-----------------|
|         | 88.0393         | 44.5233         | 30.0180         | 1  | S      | 20 |                 |                 |                 |
|         | 255.0377        | 128.0225        | 85.6841         | 2  | S[167] | 19 | 2268.9203       | 1134.9638       | 756.9783        |
|         | 422.0360        | 211.5217        | 141.3502        | 3  | S[167] | 18 | 2101.9220       | 1051.4646       | 701.3122        |
|         | 550.0946        | 275.5509        | 184.0364        | 4  | Q      | 17 | 1934.9236       | 967.9655        | 645.6461        |
|         | 663.1787        | 332.0930        | 221.7311        | 5  | L      | 16 | 1806.8650       | 903.9362        | 602.9599        |
|         | 778.2056        | 389.6064        | 260.0734        | 6  | D      | 15 | 1693.7810       | 847.3941        | 565.2652        |
|         | 906.2642        | 453.6357        | 302.7596        | 7  | Q      | 14 | 1578.7540       | 789.8807        | 526.9229        |
|         | 1019.3483       | 510.1778        | 340.4543        | 8  | L      | 13 | 1450.6955       | 725.8514        | 484.2367        |
|         | 1133.3912       | 567.1992        | 378.4686        | 9  | N      | 12 | 1337.6114       | 669.3093        | 446.5420        |
|         | 1220.4232       | 610.7152        | 407.4793        | 10 | S      | 11 | 1223.5685       | 612.2879        | 408.5277        |
|         | 1380.4539       | 690.7306        | 460.8228        | 11 | C[160] | 10 | 1136.5364       | 568.7719        | 379.5170        |
|         | 1467.4859       | 734.2466        | 489.8335        | 12 | S      | 9  | 976.5058        | 488.7565        | 326.1735        |
|         | 1554.5179       | 777.7626        | 518.8442        | 13 | S      | 8  | 889.4738        | 445.2405        | 297.1628        |
|         | 1653.5863       | 827.2968        | 551.8670        | 14 | V      | 7  | 802.4417        | 401.7245        | 268.1521        |
|         | 1754.6340       | 877.8206        | 585.5495        | 15 | T      | 6  | 703.3733        | 352.1903        | 235.1293        |
|         | 1869.6610       | 935.3341        | 623.8918        | 16 | D      | 5  | 602.3256        | 301.6665        | 201.4467        |
|         | 1966.7137       | 983.8605        | 656.2428        | 17 | P      | 4  | 487.2987        | 244.1530        | 163.1044        |
|         | 2053.7457       | 1027.3765       | 685.2534        | 18 | S      | 3  | 390.2459        | 195.6266        | 130.7535        |
|         | 2181.8407       | 1091.4240       | 727.9518        | 19 | K      | 2  | 303.2139        | 152.1106        | 101.7428        |
|         |                 |                 |                 | 20 | R      | 1  | 175.1190        | 88.0631         | 59.0445         |

# Annotated spectra from Saleem et. al. 2009

R.SS<sub>167</sub>SQLS<sub>167</sub>MELSNR<sub>166</sub>D/2

0.7944

1e+04

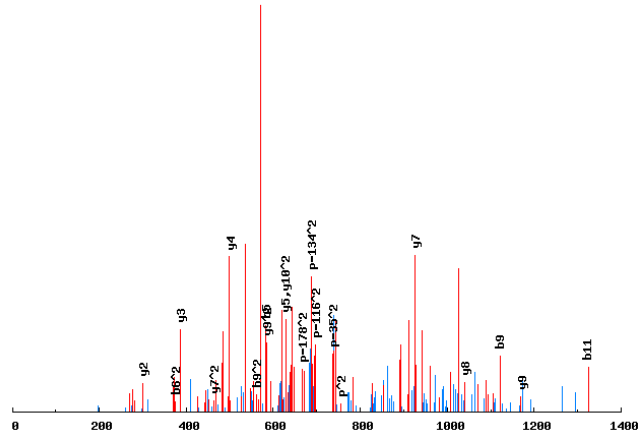

| Library | b <sup>1+</sup> | b <sup>2+</sup> | #  | AA     | #  | y <sup>1+</sup> | y <sup>2+</sup> |
|---------|-----------------|-----------------|----|--------|----|-----------------|-----------------|
|         | 88.0393         | 44.5233         | 1  | S      | 12 |                 |                 |
|         | 255.0377        | 128.0225        | 2  | S[167] | 11 | 1421.5407       | 711.2740        |
|         | 342.0697        | 171.5385        | 3  | S      | 10 | 1254.5423       | 627.7748        |
|         | 470.1283        | 235.5678        | 4  | Q      | 9  | 1167.5103       | 584.2588        |
|         | 583.2123        | 292.1098        | 5  | L      | 8  | 1039.4517       | 520.2295        |
|         | 750.2107        | 375.6090        | 6  | S[167] | 7  | 926.3677        | 463.6875        |
|         | 881.2512        | 441.1292        | 7  | M      | 6  | 759.3693        | 380.1883        |
|         | 1010.2938       | 505.6505        | 8  | E      | 5  | 628.3288        | 314.6681        |
|         | 1123.3778       | 562.1926        | 9  | L      | 4  | 499.2862        | 250.1468        |
|         | 1210.4099       | 605.7086        | 10 | S      | 3  | 386.2022        | 193.6047        |
|         | 1324.4528       | 662.7300        | 11 | N      | 2  | 299.1701        | 150.0887        |
|         |                 |                 | 12 | R[166] | 1  | 185.1272        | 93.0672         |

# Annotated spectra from Saleem et. al. 2009

K<sub>167</sub>S<sub>167</sub>S<sub>167</sub>S<sub>167</sub>M<sub>147</sub>ENDNK.L/2

0.7731

1e+04

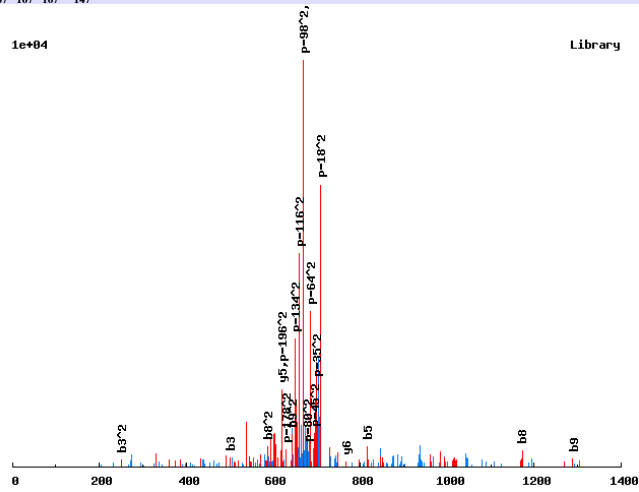

| Library | b <sup>1+</sup> | b <sup>2+</sup> | #  | AA     | #  | y <sup>1+</sup> | y <sup>2+</sup> |
|---------|-----------------|-----------------|----|--------|----|-----------------|-----------------|
|         | 168.0056        | 84.5065         | 1  | S[167] | 10 |                 |                 |
|         | 335.0040        | 168.0056        | 2  | S[167] | 9  | 1267.2987       | 634.1530        |
|         | 502.0024        | 251.5048        | 3  | S[167] | 8  | 1100.3003       | 550.6538        |
|         | 669.0007        | 335.0040        | 4  | S[167] | 7  | 933.3020        | 467.1546        |
|         | 816.0361        | 408.5217        | 5  | M[147] | 6  | 766.3036        | 383.6554        |
|         | 945.0787        | 473.0430        | 6  | E      | 5  | 619.2682        | 310.1377        |
|         | 1059.1216       | 530.0645        | 7  | N      | 4  | 490.2256        | 245.6164        |
|         | 1174.1486       | 587.5779        | 8  | D      | 3  | 376.1827        | 188.5950        |
|         | 1288.1915       | 644.5994        | 9  | N      | 2  | 261.1557        | 131.0815        |
|         |                 |                 | 10 | K      | 1  | 147.1128        | 74.0600         |



# Annotated spectra from Saleem et. al. 2009

R.S<sub>167</sub>S<sub>167</sub>S<sub>167</sub>SSSC<sub>160</sub>S<sub>167</sub>AT<sub>181</sub>S<sub>167</sub>K<sub>136</sub>-A/3

0.9424

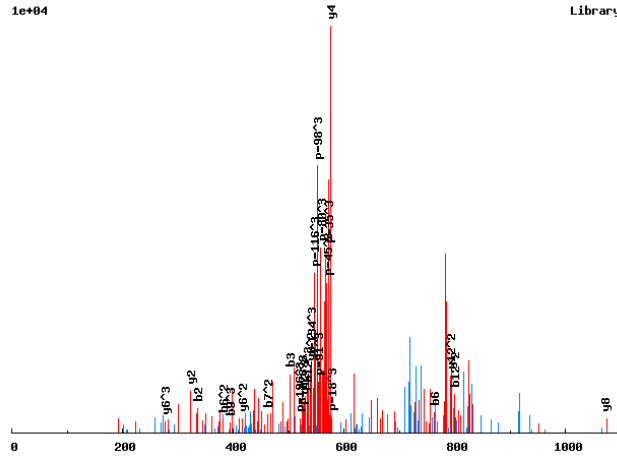

| Library | b <sup>1+</sup> | b <sup>2+</sup> | b <sup>3+</sup> | #  | AA     | #  | y <sup>1+</sup>  | y <sup>2+</sup> | y <sup>3+</sup> |
|---------|-----------------|-----------------|-----------------|----|--------|----|------------------|-----------------|-----------------|
|         | 168.0056        | 84.5065         | 56.6734         | 1  | S[167] | 13 |                  |                 |                 |
|         | <b>335.0040</b> | 168.0056        | 112.3395        | 2  | S[167] | 12 | 1583.3303        | <b>792.1688</b> | <b>528.4483</b> |
|         | <b>502.0024</b> | 251.5048        | 168.0056        | 3  | S[167] | 11 | 1416.3320        | 708.6696        | 472.7822        |
|         | 589.0344        | 295.0208        | 197.0163        | 4  | S      | 10 | 1249.3336        | 625.1704        | 417.1161        |
|         | 676.0664        | 338.5369        | 226.0270        | 5  | S      | 9  | 1162.3016        | 581.6544        | 388.1054        |
|         | <b>763.0985</b> | <b>382.0529</b> | 255.0377        | 6  | S      | 8  | <b>1075.2696</b> | <b>538.1384</b> | 359.0947        |
|         | 923.1291        | <b>462.0682</b> | 308.3812        | 7  | C[160] | 7  | 988.2375         | 494.6224        | 330.0840        |
|         | 1010.1611       | 505.5842        | 337.3919        | 8  | S      | 6  | 828.2069         | <b>414.6071</b> | <b>276.7405</b> |
|         | 1177.1595       | 589.0834        | <b>393.0580</b> | 9  | S[167] | 5  | 741.1748         | 371.0911        | 247.7298        |
|         | 1248.1966       | 624.6019        | 416.7371        | 10 | A      | 4  | <b>574.1765</b>  | 287.5919        | 192.0637        |
|         | 1429.2106       | 715.1089        | 477.0751        | 11 | T[181] | 3  | 503.1394         | 252.0733        | 168.3846        |
|         | 1596.2090       | <b>798.6081</b> | <b>532.7412</b> | 12 | S[167] | 2  | <b>322.1254</b>  | 161.5663        | 108.0466        |
|         |                 |                 |                 | 13 | K[136] | 1  | 155.1270         | 78.0671         | 52.3805         |

# Annotated spectra from Saleem et. al. 2009

R.SSSS<sub>167</sub>SS<sub>167</sub>SITILEK.T/2

0.9146

1e+04

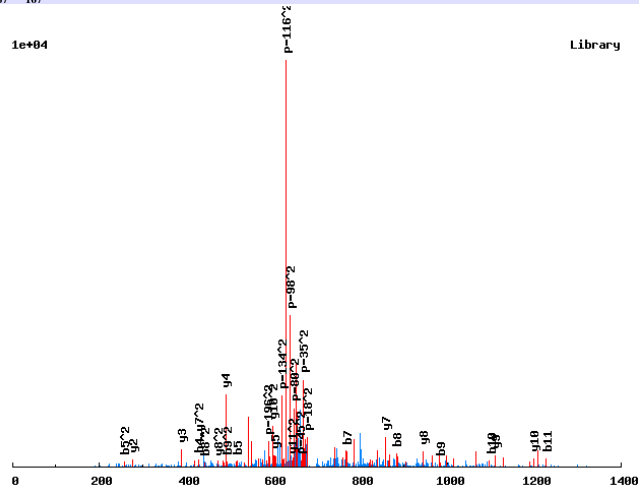

| Library | b <sup>1+</sup> | b <sup>2+</sup> | #  | AA     | #  | y <sup>1+</sup> | y <sup>2+</sup> |
|---------|-----------------|-----------------|----|--------|----|-----------------|-----------------|
|         | 88.0393         | 44.5233         | 1  | S      | 12 |                 |                 |
|         | 175.0713        | 88.0393         | 2  | S      | 11 | 1285.4960       | 643.2517        |
|         | 262.1034        | 131.5553        | 3  | S      | 10 | 1198.4640       | 599.7356        |
|         | 429.1017        | 215.0545        | 4  | S[167] | 9  | 1111.4320       | 556.2196        |
|         | 516.1338        | 258.5705        | 5  | S      | 8  | 944.4336        | 472.7204        |
|         | 683.1321        | 342.0697        | 6  | S[167] | 7  | 857.4016        | 429.2044        |
|         | 770.1642        | 385.5857        | 7  | S      | 6  | 690.4032        | 345.7053        |
|         | 883.2482        | 442.1277        | 8  | I      | 5  | 603.3712        | 302.1892        |
|         | 984.2959        | 492.6516        | 9  | T      | 4  | 490.2871        | 245.6472        |
|         | 1097.3800       | 549.1936        | 10 | L      | 3  | 389.2394        | 195.1234        |
|         | 1226.4225       | 613.7149        | 11 | E      | 2  | 276.1554        | 138.5813        |
|         |                 |                 | 12 | K      | 1  | 147.1128        | 74.0600         |

# Annotated spectra from Saleem et. al. 2009

K.SSSSTSLNS<sub>167</sub>HSPLMTAMEDPPS<sub>167</sub>PR<sub>166</sub>S/3

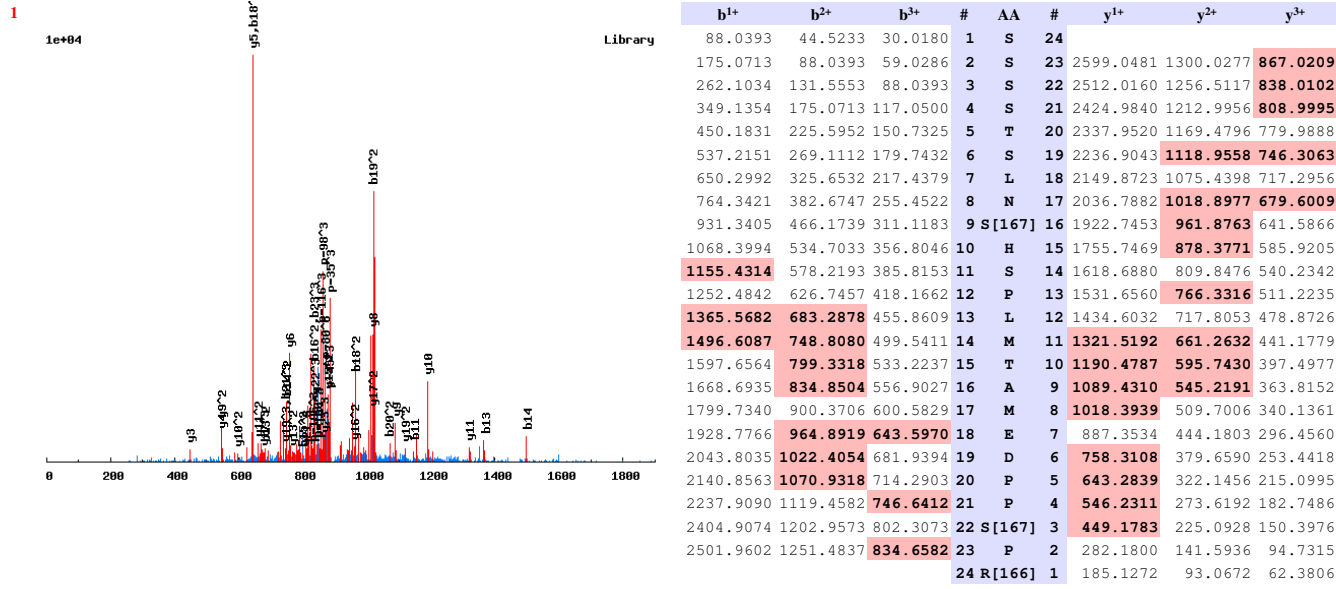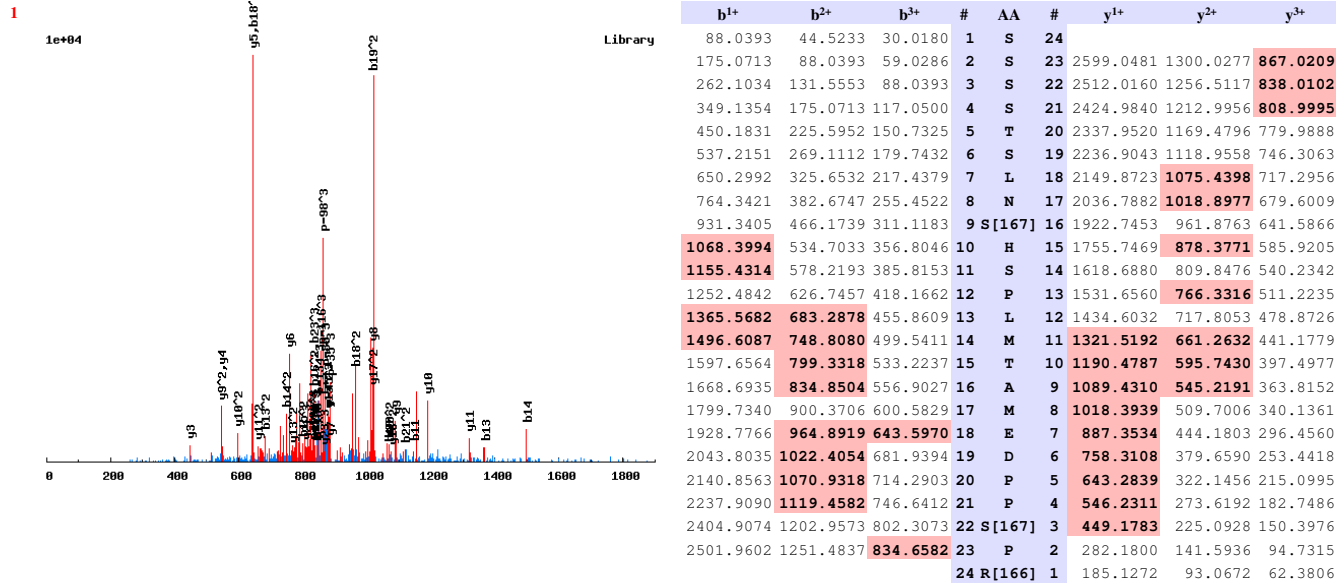

# Annotated spectra from Saleem et. al. 2009

K.SSSS<sub>167</sub>TSLNS<sub>167</sub>HSPLMTAMEDPPS<sub>167</sub>PR<sub>166</sub>S/3

0.8751

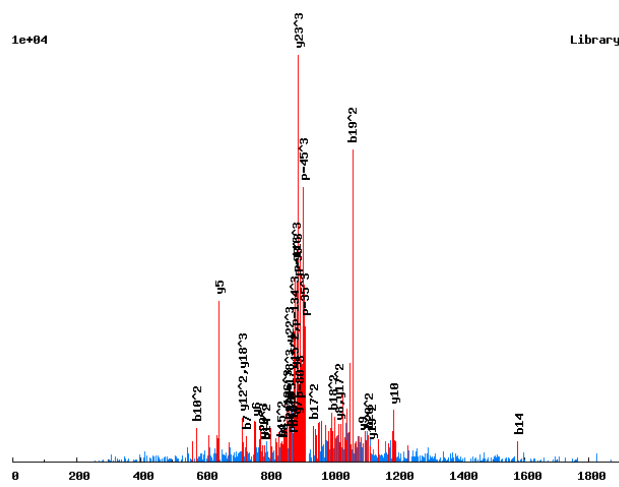

| Library | b <sup>1+</sup> | b <sup>2+</sup> | b <sup>3+</sup> | #  | AA     | #  | y <sup>1+</sup> | y <sup>2+</sup> | y <sup>3+</sup> |
|---------|-----------------|-----------------|-----------------|----|--------|----|-----------------|-----------------|-----------------|
|         | 88.0393         | 44.5233         | 30.0180         | 1  | S      | 24 |                 |                 |                 |
|         | 175.0713        | 88.0393         | 59.0286         | 2  | S      | 23 | 2679.0144       | 1340.0108       | 893.6763        |
|         | 262.1034        | 131.5553        | 88.0393         | 3  | S      | 22 | 2591.9824       | 1296.4948       | 864.6656        |
|         | 429.1017        | 215.0545        | 143.7054        | 4  | S[167] | 21 | 2504.9503       | 1252.9788       | 835.6550        |
|         | 530.1494        | 265.5783        | 177.3880        | 5  | T      | 20 | 2337.9520       | 1169.4796       | 779.9888        |
|         | 617.1814        | 309.0944        | 206.3987        | 6  | S      | 19 | 2236.9043       | 1118.9558       | 746.3063        |
|         | 730.2655        | 365.6364        | 244.0934        | 7  | L      | 18 | 2149.8723       | 1075.4398       | 717.2956        |
|         | 844.3084        | 422.6579        | 282.1077        | 8  | N      | 17 | 2036.7882       | 1018.8977       | 679.6009        |
|         | 1011.3068       | 506.1570        | 337.7738        | 9  | S[167] | 16 | 1922.7453       | 961.8763        | 641.5866        |
|         | 1148.3657       | 574.6865        | 383.4601        | 10 | H      | 15 | 1755.7469       | 878.3771        | 585.9205        |
|         | 1235.3977       | 618.2025        | 412.4708        | 11 | S      | 14 | 1618.6880       | 809.8476        | 540.2342        |
|         | 1332.4505       | 666.7289        | 444.8217        | 12 | P      | 13 | 1531.6560       | 766.3316        | 511.2235        |
|         | 1445.5346       | 723.2709        | 482.5164        | 13 | L      | 12 | 1434.6032       | 717.8053        | 478.8726        |
|         | 1576.5750       | 788.7912        | 526.1965        | 14 | M      | 11 | 1321.5192       | 661.2632        | 441.1779        |
|         | 1677.6227       | 839.3150        | 559.8791        | 15 | T      | 10 | 1190.4787       | 595.7430        | 397.4977        |
|         | 1748.6598       | 874.8336        | 583.5581        | 16 | A      | 9  | 1089.4310       | 545.2191        | 363.8152        |
|         | 1879.7003       | 940.3538        | 627.2383        | 17 | M      | 8  | 1018.3939       | 509.7006        | 340.1361        |
|         | 2008.7429       | 1004.8751       | 670.2525        | 18 | E      | 7  | 887.3534        | 444.1803        | 296.4560        |
|         | 2123.7699       | 1062.3886       | 708.5948        | 19 | D      | 6  | 758.3108        | 379.6590        | 253.4418        |
|         | 2220.8226       | 1110.9149       | 740.9457        | 20 | P      | 5  | 643.2839        | 322.1456        | 215.0995        |
|         | 2317.8754       | 1159.4413       | 773.2966        | 21 | P      | 4  | 546.2311        | 273.6192        | 182.7486        |
|         | 2484.8737       | 1242.9405       | 828.9628        | 22 | S[167] | 3  | 449.1783        | 225.0928        | 150.3976        |
|         | 2581.9265       | 1291.4669       | 861.3137        | 23 | P      | 2  | 282.1800        | 141.5936        | 94.7315         |
|         |                 |                 |                 | 24 | R[166] | 1  | 185.1272        | 93.0672         | 62.3806         |

# Annotated spectra from Saleem et. al. 2009

K.SS<sub>167</sub>SST<sub>181</sub>SLNSHS<sub>167</sub>PLM<sub>147</sub>TAM<sub>147</sub>EDPPS<sub>167</sub>PR.S/3

0.791

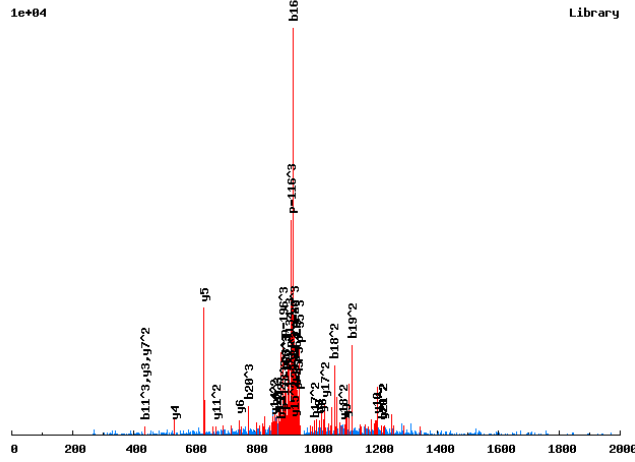

| Library | b <sup>1+</sup> | b <sup>2+</sup> | b <sup>3+</sup> | #  | AA     | #  | y <sup>1+</sup> | y <sup>2+</sup> | y <sup>3+</sup> |
|---------|-----------------|-----------------|-----------------|----|--------|----|-----------------|-----------------|-----------------|
|         | 88.0393         | 44.5233         | 30.0180         | 1  | S      | 24 |                 |                 |                 |
|         | 255.0377        | 128.0225        | 85.6841         | 2  | S[167] | 23 | 2780.9623       | 1390.9848       | 927.6589        |
|         | 342.0697        | 171.5385        | 114.6948        | 3  | S      | 22 | 2613.9639       | 1307.4856       | 871.9928        |
|         | 429.1017        | 215.0545        | 143.7054        | 4  | S      | 21 | 2526.9319       | 1263.9696       | 842.9822        |
|         | 610.1157        | 305.5615        | 204.0434        | 5  | T[181] | 20 | 2439.8999       | 1220.4536       | 813.9715        |
|         | 697.1478        | 349.0775        | 233.0541        | 6  | S      | 19 | 2258.8859       | 1129.9466       | 753.6335        |
|         | 810.2318        | 405.6196        | 270.7488        | 7  | L      | 18 | 2171.8538       | 1086.4306       | 724.6228        |
|         | 924.2748        | 462.6410        | 308.7631        | 8  | N      | 17 | 2058.7698       | 1029.8885       | 686.9281        |
|         | 1011.3068       | 506.1570        | 337.7738        | 9  | S      | 16 | 1944.7268       | 972.8671        | 648.9138        |
|         | 1148.3657       | 574.6865        | 383.4601        | 10 | H      | 15 | 1857.6948       | 929.3510        | 619.9031        |
|         | 1315.3641       | 658.1857        | 439.1262        | 11 | S[167] | 14 | 1720.6359       | 860.8216        | 574.2168        |
|         | 1412.4168       | 706.7121        | 471.4771        | 12 | P      | 13 | 1553.6375       | 777.3224        | 518.5507        |
|         | 1525.5009       | 763.2541        | 509.1718        | 13 | L      | 12 | 1456.5848       | 728.7960        | 486.1998        |
|         | 1672.5363       | 836.7718        | 558.1836        | 14 | M[147] | 11 | 1343.5007       | 672.2540        | 448.5051        |
|         | 1773.5840       | 887.2956        | 591.8662        | 15 | T      | 10 | 1196.4653       | 598.7363        | 399.4933        |
|         | 1844.6211       | 922.8142        | 615.5452        | 16 | A      | 9  | 1095.4176       | 548.2125        | 365.8107        |
|         | 1991.6565       | 996.3319        | 664.5570        | 17 | M[147] | 8  | 1024.3805       | 512.6939        | 342.1317        |
|         | 2120.6991       | 1060.8532       | 707.5712        | 18 | E      | 7  | 877.3451        | 439.1762        | 293.1199        |
|         | 2235.7260       | 1118.3666       | 745.9135        | 19 | D      | 6  | 748.3025        | 374.6549        | 250.1057        |
|         | 2332.7788       | 1166.8930       | 778.2644        | 20 | P      | 5  | 633.2756        | 317.1414        | 211.7634        |
|         | 2429.8315       | 1215.4194       | 810.6154        | 21 | P      | 4  | 536.2228        | 268.6151        | 179.4125        |
|         | 2596.8299       | 1298.9186       | 866.2815        | 22 | S[167] | 3  | 439.1701        | 220.0887        | 147.0615        |
|         | 2693.8826       | 1347.4450       | 898.6324        | 23 | P      | 2  | 272.1717        | 136.5895        | 91.3954         |
|         |                 |                 |                 | 24 | R      | 1  | 175.1190        | 88.0631         | 59.0445         |

# Annotated spectra from Saleem et. al. 2009

R.SSS<sub>167</sub>S<sub>167</sub>TSNLSLNR.S/2

0.9997

1e+04

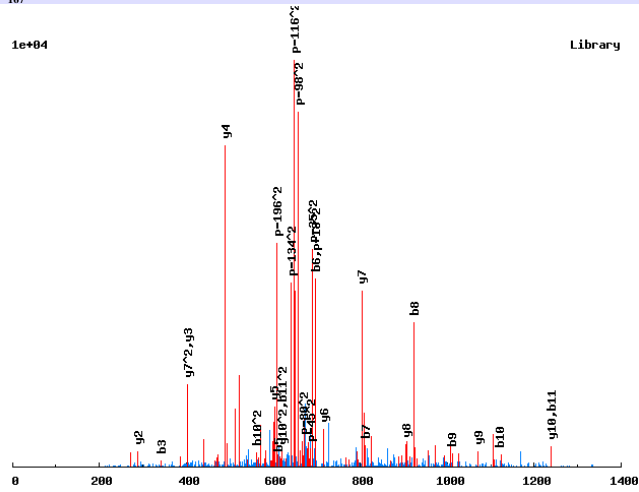

| Library | b <sup>1+</sup> | b <sup>2+</sup> | #  | AA     | #  | y <sup>1+</sup> | y <sup>2+</sup> |
|---------|-----------------|-----------------|----|--------|----|-----------------|-----------------|
|         | 88.0393         | 44.5233         | 1  | S      | 12 |                 |                 |
|         | 175.0713        | 88.0393         | 2  | S      | 11 | 1325.5134       | 663.2604        |
|         | 342.0697        | 171.5385        | 3  | S[167] | 10 | 1238.4814       | 619.7443        |
|         | 509.0681        | 255.0377        | 4  | S[167] | 9  | 1071.4830       | 536.2452        |
|         | 610.1157        | 305.5615        | 5  | T      | 8  | 904.4847        | 452.7460        |
|         | 697.1478        | 349.0775        | 6  | S      | 7  | 803.4370        | 402.2221        |
|         | 811.1907        | 406.0990        | 7  | N      | 6  | 716.4050        | 358.7061        |
|         | 924.2748        | 462.6410        | 8  | L      | 5  | 602.3620        | 301.6847        |
|         | 1011.3068       | 506.1570        | 9  | S      | 4  | 489.2780        | 245.1426        |
|         | 1124.3909       | 562.6991        | 10 | L      | 3  | 402.2459        | 201.6266        |
|         | 1238.4338       | 619.7205        | 11 | N      | 2  | 289.1619        | 145.0846        |
|         |                 |                 | 12 | R      | 1  | 175.1190        | 88.0631         |

# Annotated spectra from Saleem et. al. 2009

R.S<sub>167</sub>SSST<sub>181</sub>SNLS<sub>167</sub>LNR<sub>166</sub>S/2

0.6539

1e+04

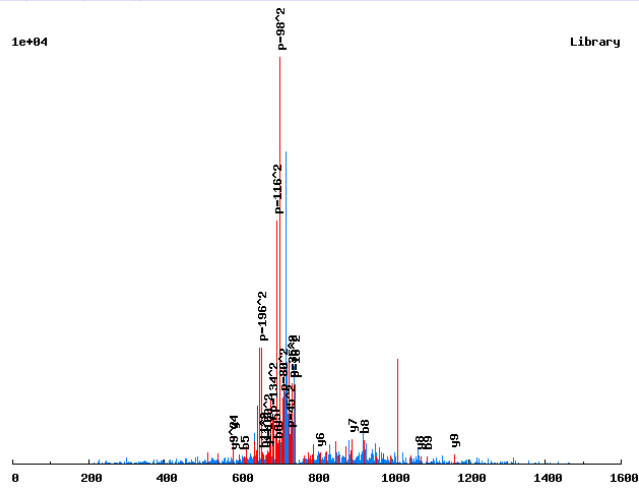

| Library | b <sup>1+</sup> | b <sup>2+</sup> | #  | AA | #     | y <sup>1+</sup> | y <sup>2+</sup> |          |
|---------|-----------------|-----------------|----|----|-------|-----------------|-----------------|----------|
|         | 168.0056        | 84.5065         | 1  | S  | [167] | 12              |                 |          |
|         | 255.0377        | 128.0225        | 2  | S  | 11    | 1335.5217       | 668.2645        |          |
|         | 342.0697        | 171.5385        | 3  | S  | 10    | 1248.4897       | 624.7485        |          |
|         | 429.1017        | 215.0545        | 4  | S  | 9     | 1161.4576       | 581.2325        |          |
|         | 610.1157        | 305.5615        | 5  | T  | [181] | 8               | 1074.4256       | 537.7164 |
|         | 697.1478        | 349.0775        | 6  | S  | 7     | 893.4116        | 447.2094        |          |
|         | 811.1907        | 406.0990        | 7  | N  | 6     | 806.3796        | 403.6934        |          |
|         | 924.2748        | 462.6410        | 8  | L  | 5     | 692.3366        | 346.6720        |          |
|         | 1091.2731       | 546.1402        | 9  | S  | [167] | 4               | 579.2526        | 290.1299 |
|         | 1204.3572       | 602.6822        | 10 | L  | 3     | 412.2542        | 206.6307        |          |
|         | 1318.4001       | 659.7037        | 11 | N  | 2     | 299.1701        | 150.0887        |          |
|         |                 |                 | 12 | R  | [166] | 1               | 185.1272        | 93.0672  |

# Annotated spectra from Saleem et. al. 2009

R.S<sub>167</sub>SSSVS<sub>167</sub>LKAAEKPFK.V/2

0.9987

1e+04

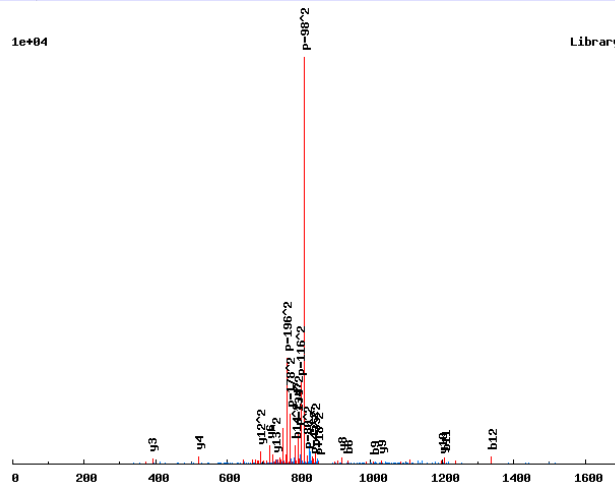

| Library | b <sup>1+</sup> | b <sup>2+</sup> | #  | AA     | #  | y <sup>1+</sup> | y <sup>2+</sup> |
|---------|-----------------|-----------------|----|--------|----|-----------------|-----------------|
|         | 168.0056        | 84.5065         | 1  | S[167] | 15 |                 |                 |
|         | 255.0377        | 128.0225        | 2  | S      | 14 | 1558.7876       | 779.8975        |
|         | 342.0697        | 171.5385        | 3  | S      | 13 | 1471.7556       | 736.3814        |
|         | 429.1017        | 215.0545        | 4  | S      | 12 | 1384.7236       | 692.8654        |
|         | 528.1701        | 264.5887        | 5  | V      | 11 | 1297.6915       | 649.3494        |
|         | 695.1685        | 348.0879        | 6  | S[167] | 10 | 1198.6231       | 599.8152        |
|         | 808.2526        | 404.6299        | 7  | L      | 9  | 1031.6248       | 516.3160        |
|         | 936.3475        | 468.6774        | 8  | K      | 8  | 918.5407        | 459.7740        |
|         | 1007.3846       | 504.1960        | 9  | A      | 7  | 790.4457        | 395.7265        |
|         | 1078.4217       | 539.7145        | 10 | A      | 6  | 719.4086        | 360.2080        |
|         | 1207.4643       | 604.2358        | 11 | E      | 5  | 648.3715        | 324.6894        |
|         | 1335.5593       | 668.2833        | 12 | K      | 4  | 519.3289        | 260.1681        |
|         | 1432.6121       | 716.8097        | 13 | P      | 3  | 391.2340        | 196.1206        |
|         | 1579.6805       | 790.3439        | 14 | F      | 2  | 294.1812        | 147.5942        |
|         |                 |                 | 15 | K      | 1  | 147.1128        | 74.0600         |



# Annotated spectra from Saleem et. al. 2009

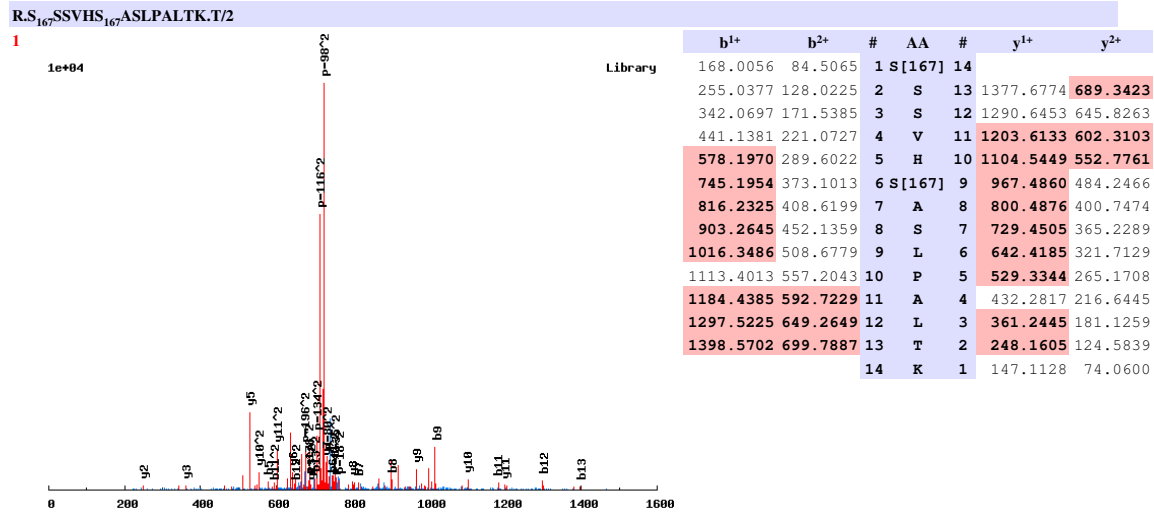

# Annotated spectra from Saleem et. al. 2009

R.S<sub>167</sub>S<sub>167</sub>SVTSASSHYIGLPQEAQINGEPLQR<sub>166</sub>.A/3

0.9842

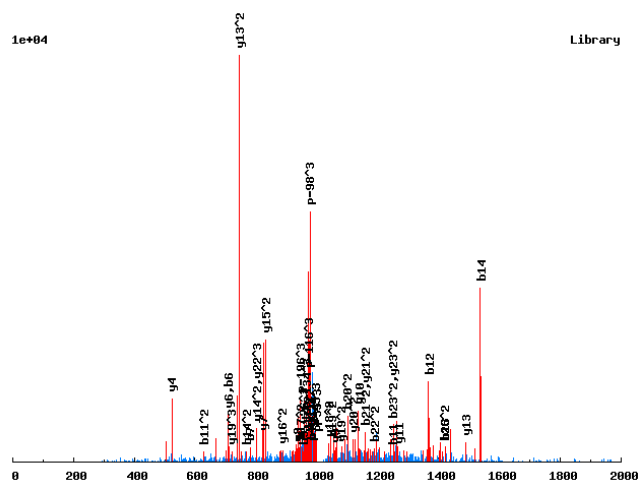

| Library | b <sup>1+</sup> | b <sup>2+</sup> | b <sup>3+</sup> | #  | AA | #     | y <sup>1+</sup> | y <sup>2+</sup> | y <sup>3+</sup> |         |
|---------|-----------------|-----------------|-----------------|----|----|-------|-----------------|-----------------|-----------------|---------|
|         | 168.0056        | 84.5065         | 56.6734         | 1  | S  | [167] | 27              |                 |                 |         |
|         | 335.0040        | 168.0056        | 112.3395        | 2  | S  | [167] | 26              | 2859.3548       | 1430.1810       |         |
|         | 422.0360        | 211.5217        | 141.3502        | 3  | S  | 25    | 2692.3564       | 1346.6818       | 898.1237        |         |
|         | 521.1044        | 261.0559        | 174.3730        | 4  | V  | 24    | 2605.3244       | 1303.1658       | 869.1130        |         |
|         | 622.1521        | 311.5797        | 208.0556        | 5  | T  | 23    | 2506.2560       | 1253.6316       | 836.0902        |         |
|         | 709.1842        | 355.0957        | 237.0662        | 6  | S  | 22    | 2405.2083       | 1203.1078       | 802.4076        |         |
|         | 780.2213        | 390.6143        | 260.7453        | 7  | A  | 21    | 2318.1763       | 1159.5918       | 773.3969        |         |
|         | 867.2533        | 434.1303        | 289.7560        | 8  | S  | 20    | 2247.1392       | 1124.0732       | 749.7179        |         |
|         | 954.2853        | 477.6463        | 318.7666        | 9  | S  | 19    | 2160.1071       | 1080.5572       | 720.7072        |         |
|         | 1091.3442       | 546.1758        | 364.4529        | 10 | H  | 18    | 2073.0751       | 1037.0412       | 691.6966        |         |
|         | 1254.4076       | 627.7074        | 418.8074        | 11 | Y  | 17    | 1936.0162       | 968.5117        | 646.0102        |         |
|         | 1367.4916       | 684.2495        | 456.5021        | 12 | I  | 16    | 1772.9529       | 886.9801        | 591.6558        |         |
|         | 1424.5131       | 712.7602        | 475.5092        | 13 | G  | 15    | 1659.8688       | 830.4380        | 553.9611        |         |
|         | 1537.5971       | 769.3022        | 513.2039        | 14 | L  | 14    | 1602.8473       | 801.9273        | 534.9540        |         |
|         | 1634.6499       | 817.8286        | 545.5548        | 15 | P  | 13    | 1489.7633       | 745.3853        | 497.2593        |         |
|         | 1762.7085       | 881.8579        | 588.2410        | 16 | Q  | 12    | 1392.7105       | 696.8589        | 464.9084        |         |
|         | 1891.7511       | 946.3792        | 631.2552        | 17 | E  | 11    | 1264.6519       | 632.8296        | 422.2222        |         |
|         | 1962.7882       | 981.8977        | 654.9342        | 18 | A  | 10    | 1135.6093       | 568.3083        | 379.2080        |         |
|         | 2090.8468       | 1045.9270       | 697.6204        | 19 | Q  | 9     | 1064.5722       | 532.7898        | 355.5289        |         |
|         | 2203.9308       | 1102.4691       | 735.3151        | 20 | I  | 8     | 936.5137        | 468.7605        | 312.8427        |         |
|         | 2317.9738       | 1159.4905       | 773.3294        | 21 | N  | 7     | 823.4296        | 412.2184        | 275.1481        |         |
|         | 2374.9952       | 1188.0012       | 792.3366        | 22 | G  | 6     | 709.3867        | 355.1970        | 237.1337        |         |
|         | 2504.0378       | 1252.5225       | 835.3508        | 23 | E  | 5     | 652.3652        | 326.6862        | 218.1266        |         |
|         | 2601.0906       | 1301.0489       | 867.7017        | 24 | P  | 4     | 523.3226        | 262.1649        | 175.1124        |         |
|         | 2714.1746       | 1357.5910       | 905.3964        | 25 | L  | 3     | 426.2699        | 213.6386        | 142.7615        |         |
|         | 2842.2332       | 1421.6202       | 948.0826        | 26 | Q  | 2     | 313.1858        | 157.0965        | 105.0668        |         |
|         |                 |                 |                 | 27 | R  | [166] | 1               | 185.1272        | 93.0672         | 62.3806 |

# Annotated spectra from Saleem et. al. 2009

R.S<sub>167</sub>S<sub>167</sub>SYSSNS<sub>167</sub>S<sub>167</sub>M<sub>147</sub>S<sub>167</sub>K<sub>136</sub>D/3

0.8509

1e+04

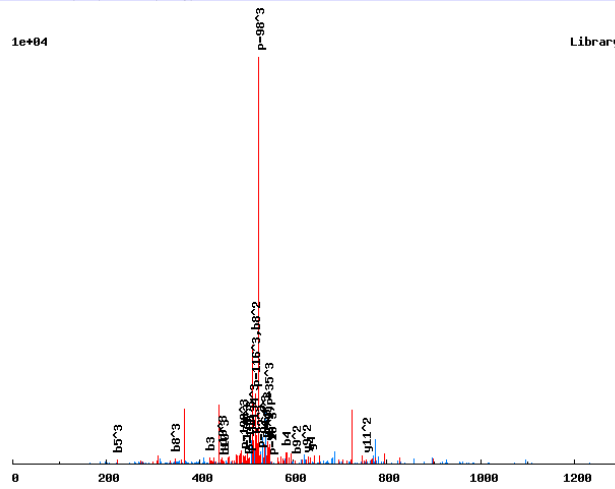

| Library | b <sup>1+</sup> | b <sup>2+</sup> | b <sup>3+</sup> | #  | AA     | #  | y <sup>1+</sup> | y <sup>2+</sup> | y <sup>3+</sup> |
|---------|-----------------|-----------------|-----------------|----|--------|----|-----------------|-----------------|-----------------|
|         | 168.0056        | 84.5065         | 56.6734         | 1  | S[167] | 12 |                 |                 |                 |
|         | 335.0040        | 168.0056        | 112.3395        | 2  | S[167] | 11 | 1508.3582       | 754.6827        | 503.4576        |
|         | 422.0360        | 211.5217        | 141.3502        | 3  | S      | 10 | 1341.3598       | 671.1836        | 447.7915        |
|         | 585.0994        | 293.0533        | 195.7046        | 4  | Y      | 9  | 1254.3278       | 627.6675        | 418.7808        |
|         | 672.1314        | 336.5693        | 224.7153        | 5  | S      | 8  | 1091.2645       | 546.1359        | 364.4263        |
|         | 759.1634        | 380.0854        | 253.7260        | 6  | S      | 7  | 1004.2324       | 502.6199        | 335.4157        |
|         | 873.2064        | 437.1068        | 291.7403        | 7  | N      | 6  | 917.2004        | 459.1038        | 306.4050        |
|         | 1040.2047       | 520.6060        | 347.4064        | 8  | S[167] | 5  | 803.1575        | 402.0824        | 268.3907        |
|         | 1207.2031       | 604.1052        | 403.0725        | 9  | S[167] | 4  | 636.1591        | 318.5832        | 212.7246        |
|         | 1354.2385       | 677.6229        | 452.0843        | 10 | M[147] | 3  | 469.1608        | 235.0840        | 157.0584        |
|         | 1521.2368       | 761.1221        | 507.7505        | 11 | S[167] | 2  | 322.1254        | 161.5663        | 108.0466        |
|         |                 |                 |                 | 12 | K[136] | 1  | 155.1270        | 78.0671         | 52.3805         |

# Annotated spectra from Saleem et. al. 2009

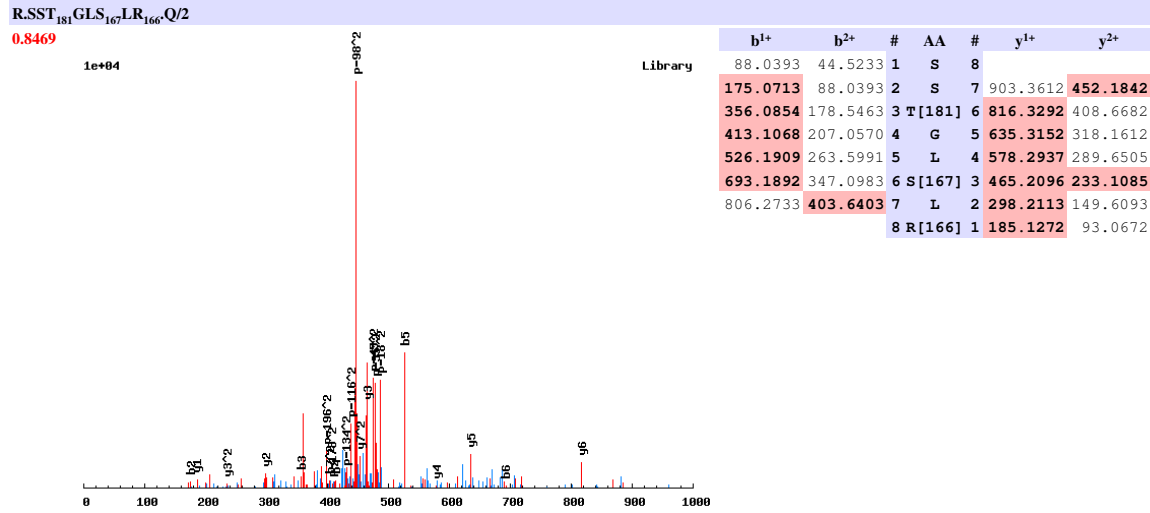



# Annotated spectra from Saleem et. al. 2009

K.SST<sub>181</sub>LSS<sub>167</sub>STKDNNESTFVPEGEK.F/3

0.9981

1e+04

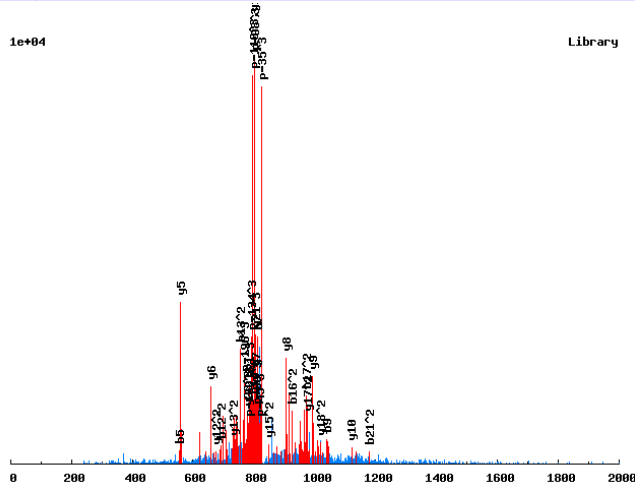

| Library | b <sup>1+</sup> | b <sup>2+</sup> | b <sup>3+</sup> | #  | AA     | #  | y <sup>1+</sup> | y <sup>2+</sup> | y <sup>3+</sup> |
|---------|-----------------|-----------------|-----------------|----|--------|----|-----------------|-----------------|-----------------|
|         | 88.0393         | 44.5233         | 30.0180         | 1  | S      | 22 |                 |                 |                 |
|         | 175.0713        | 88.0393         | 59.0286         | 2  | S      | 21 | 2416.9793       | 1208.9933       | 806.3313        |
|         | 356.0854        | 178.5463        | 119.3666        | 3  | T[181] | 20 | 2329.9473       | 1165.4773       | 777.3206        |
|         | 469.1694        | 235.0883        | 157.0613        | 4  | L      | 19 | 2148.9332       | 1074.9703       | 716.9826        |
|         | 556.2014        | 278.6044        | 186.0720        | 5  | S      | 18 | 2035.8492       | 1018.4282       | 679.2879        |
|         | 723.1998        | 362.1035        | 241.7381        | 6  | S[167] | 17 | 1948.8172       | 974.9122        | 650.2772        |
|         | 810.2318        | 405.6196        | 270.7488        | 7  | S      | 16 | 1781.8188       | 891.4130        | 594.6111        |
|         | 911.2795        | 456.1434        | 304.4314        | 8  | T      | 15 | 1694.7868       | 847.8970        | 565.6004        |
|         | 1039.3745       | 520.1909        | 347.1297        | 9  | K      | 14 | 1593.7391       | 797.3732        | 531.9179        |
|         | 1154.4014       | 577.7043        | 385.4720        | 10 | D      | 13 | 1465.6441       | 733.3257        | 489.2196        |
|         | 1268.4443       | 634.7258        | 423.4863        | 11 | N      | 12 | 1350.6172       | 675.8122        | 450.8772        |
|         | 1382.4873       | 691.7473        | 461.5006        | 12 | N      | 11 | 1236.5742       | 618.7908        | 412.8629        |
|         | 1511.5299       | 756.2686        | 504.5148        | 13 | E      | 10 | 1122.5313       | 561.7693        | 374.8486        |
|         | 1598.5619       | 799.7846        | 533.5255        | 14 | S      | 9  | 993.4887        | 497.2480        | 331.8344        |
|         | 1699.6096       | 850.3084        | 567.2080        | 15 | T      | 8  | 906.4567        | 453.7320        | 302.8238        |
|         | 1846.6780       | 923.8426        | 616.2308        | 16 | F      | 7  | 805.4090        | 403.2082        | 269.1412        |
|         | 1945.7464       | 973.3768        | 649.2537        | 17 | V      | 6  | 658.3406        | 329.6739        | 220.1184        |
|         | 2042.7992       | 1021.9032       | 681.6046        | 18 | P      | 5  | 559.2722        | 280.1397        | 187.0956        |
|         | 2171.8417       | 1086.4245       | 724.6188        | 19 | E      | 4  | 462.2194        | 231.6134        | 154.7447        |
|         | 2228.8632       | 1114.9352       | 743.6259        | 20 | G      | 3  | 333.1768        | 167.0921        | 111.7305        |
|         | 2357.9058       | 1179.4565       | 786.6401        | 21 | E      | 2  | 276.1554        | 138.5813        | 92.7233         |
|         |                 |                 |                 | 22 | K      | 1  | 147.1128        | 74.0600         | 49.7091         |

# Annotated spectra from Saleem et. al. 2009

K.S<sub>167</sub>STNLAALPK.R/2

0.9987

1e+04

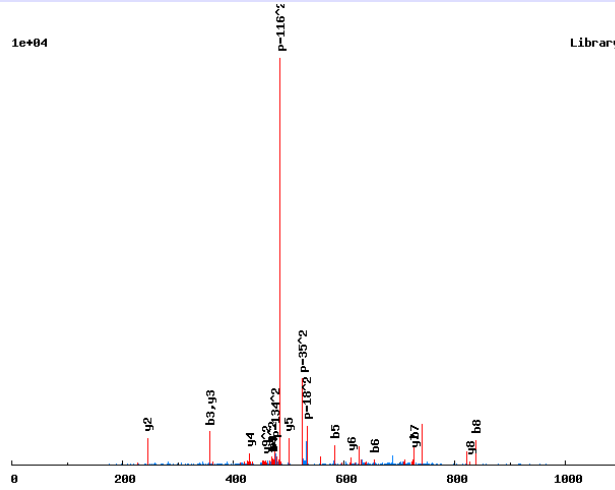

| Library | b <sup>1+</sup> | b <sup>2+</sup> | #  | AA      | #  | y <sup>1+</sup> | y <sup>2+</sup> |
|---------|-----------------|-----------------|----|---------|----|-----------------|-----------------|
|         | 168.0056        | 84.5065         | 1  | S [167] | 10 |                 |                 |
|         | 255.0377        | 128.0225        | 2  | S       | 9  | 914.5305        | 457.7689        |
|         | 356.0854        | 178.5463        | 3  | T       | 8  | 827.4985        | 414.2529        |
|         | 470.1283        | 235.5678        | 4  | N       | 7  | 726.4508        | 363.7291        |
|         | 583.2123        | 292.1098        | 5  | L       | 6  | 612.4079        | 306.7076        |
|         | 654.2495        | 327.6284        | 6  | A       | 5  | 499.3238        | 250.1656        |
|         | 725.2866        | 363.1469        | 7  | A       | 4  | 428.2867        | 214.6470        |
|         | 838.3706        | 419.6890        | 8  | L       | 3  | 357.2496        | 179.1284        |
|         | 935.4234        | 468.2153        | 9  | P       | 2  | 244.1656        | 122.5864        |
|         |                 |                 | 10 | K       | 1  | 147.1128        | 74.0600         |

# Annotated spectra from Saleem et. al. 2009

R.S<sub>167</sub>S<sub>167</sub>TPLSGAASSC<sub>160</sub>FQYNNVR<sub>166</sub>E/3

0.9287

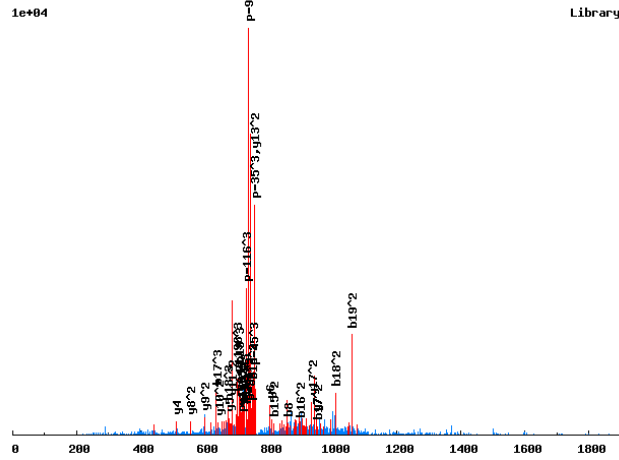

| Library | b <sup>1+</sup> | b <sup>2+</sup> | b <sup>3+</sup> | #  | AA     | #  | y <sup>1+</sup> | y <sup>2+</sup> | y <sup>3+</sup> |
|---------|-----------------|-----------------|-----------------|----|--------|----|-----------------|-----------------|-----------------|
|         | 168.0056        | 84.5065         | 56.6734         | 1  | S[167] | 20 |                 |                 |                 |
|         | 335.0040        | 168.0056        | 112.3395        | 2  | S[167] | 19 | 2135.9091       | 1068.4582       | 712.6412        |
|         | 436.0517        | 218.5295        | 146.0221        | 3  | T      | 18 | 1968.9108       | 984.9590        | 656.9751        |
|         | 533.1044        | 267.0559        | 178.3730        | 4  | P      | 17 | 1867.8631       | 934.4352        | 623.2925        |
|         | 646.1885        | 323.5979        | 216.0677        | 5  | L      | 16 | 1770.8103       | 885.9088        | 590.9416        |
|         | 733.2205        | 367.1139        | 245.0784        | 6  | S      | 15 | 1657.7263       | 829.3668        | 553.2469        |
|         | 790.2420        | 395.6246        | 264.0855        | 7  | G      | 14 | 1570.6942       | 785.8508        | 524.2363        |
|         | 861.2791        | 431.1432        | 287.7646        | 8  | A      | 13 | 1513.6728       | 757.3400        | 505.2291        |
|         | 932.3162        | 466.6617        | 311.4436        | 9  | A      | 12 | 1442.6357       | 721.8215        | 481.5501        |
|         | 1019.3482       | 510.1778        | 340.4543        | 10 | S      | 11 | 1371.5986       | 686.3029        | 457.8710        |
|         | 1106.3803       | 553.6938        | 369.4649        | 11 | S      | 10 | 1284.5665       | 642.7869        | 428.8604        |
|         | 1193.4123       | 597.2098        | 398.4756        | 12 | S      | 9  | 1197.5345       | 599.2709        | 399.8497        |
|         | 1353.4430       | 677.2251        | 451.8192        | 13 | C[160] | 8  | 1110.5025       | 555.7549        | 370.8390        |
|         | 1500.5114       | 750.7593        | 500.8420        | 14 | F      | 7  | 950.4718        | 475.7395        | 317.4955        |
|         | 1628.5699       | 814.7886        | 543.5282        | 15 | Q      | 6  | 803.4034        | 402.2053        | 268.4727        |
|         | 1791.6333       | 896.3203        | 597.8826        | 16 | Y      | 5  | 675.3448        | 338.1760        | 225.7865        |
|         | 1905.6762       | 953.3417        | 635.8969        | 17 | N      | 4  | 512.2815        | 256.6444        | 171.4320        |
|         | 2019.7191       | 1010.3632       | 673.9112        | 18 | N      | 3  | 398.2386        | 199.6229        | 133.4177        |
|         | 2118.7875       | 1059.8974       | 706.9340        | 19 | V      | 2  | 284.1956        | 142.6015        | 95.4034         |
|         |                 |                 |                 | 20 | R[166] | 1  | 185.1272        | 93.0672         | 62.3806         |



# Annotated spectra from Saleem et. al. 2009

K.SSTS<sub>167</sub>LK<sub>136</sub>T<sub>181</sub>LGSNAQPR<sub>166</sub>T/3

0.7085

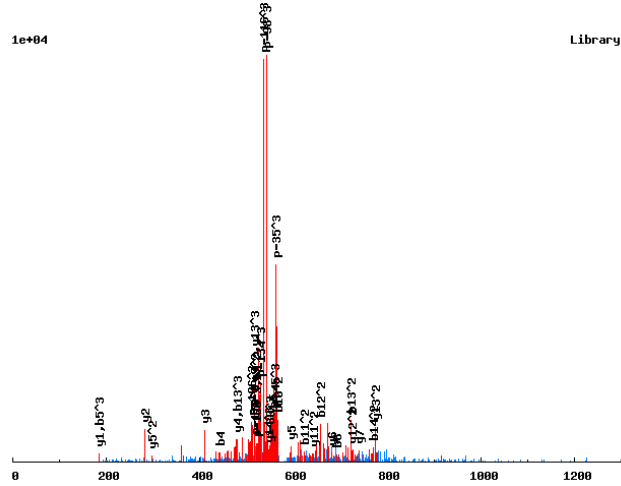

| Library | b <sup>1+</sup> | b <sup>2+</sup> | b <sup>3+</sup> | #  | AA     | #  | y <sup>1+</sup> | y <sup>2+</sup> | y <sup>3+</sup> |
|---------|-----------------|-----------------|-----------------|----|--------|----|-----------------|-----------------|-----------------|
|         | 88.0393         | 44.5233         | 30.0180         | 1  | S      | 15 |                 |                 |                 |
|         | 175.0713        | 88.0393         | 59.0286         | 2  | S      | 14 | 1637.7414       | 819.3744        | 546.5853        |
|         | 276.1190        | 138.5631        | 92.7112         | 3  | T      | 13 | 1550.7094       | 775.8584        | 517.5747        |
|         | 443.1174        | 222.0623        | 148.3773        | 4  | S[167] | 12 | 1449.6617       | 725.3345        | 483.8921        |
|         | 556.2014        | 278.6044        | 186.0720        | 5  | L      | 11 | 1282.6634       | 641.8353        | 428.2260        |
|         | 692.3106        | 346.6589        | 231.4417        | 6  | K[136] | 10 | 1169.5793       | 585.2933        | 390.5313        |
|         | 873.3246        | 437.1659        | 291.7797        | 7  | T[181] | 9  | 1033.4702       | 517.2387        | 345.1616        |
|         | 986.4087        | 493.7080        | 329.4744        | 8  | L      | 8  | 852.4561        | 426.7317        | 284.8236        |
|         | 1043.4301       | 522.2187        | 348.4816        | 9  | G      | 7  | 739.3721        | 370.1897        | 247.1289        |
|         | 1130.4622       | 565.7347        | 377.4922        | 10 | S      | 6  | 682.3506        | 341.6790        | 228.1217        |
|         | 1244.5051       | 622.7562        | 415.5066        | 11 | N      | 5  | 595.3186        | 298.1629        | 199.1111        |
|         | 1315.5422       | 658.2747        | 439.1856        | 12 | A      | 4  | 481.2757        | 241.1415        | 161.0967        |
|         | 1443.6008       | 722.3040        | 481.8718        | 13 | Q      | 3  | 410.2386        | 205.6229        | 137.4177        |
|         | 1540.6535       | 770.8304        | 514.2227        | 14 | P      | 2  | 282.1800        | 141.5936        | 94.7315         |
|         |                 |                 |                 | 15 | R[166] | 1  | 185.1272        | 93.0672         | 62.3806         |

# Annotated spectra from Saleem et. al. 2009

K.SST<sub>181</sub>T<sub>181</sub>S<sub>167</sub>S<sub>167</sub>T<sub>181</sub>SK.K/3

0.8394

1e+04

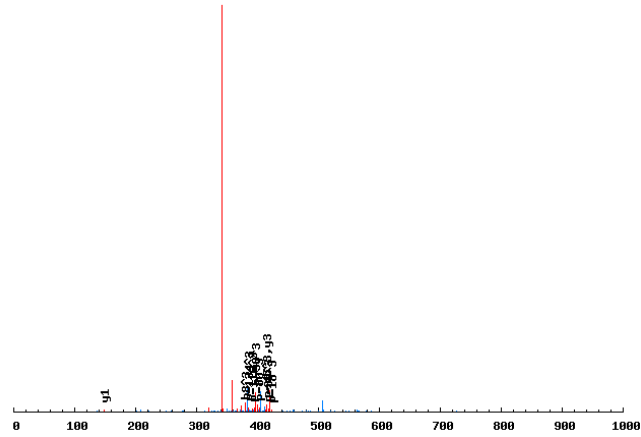

| Library | b <sup>1+</sup> | b <sup>2+</sup> | b <sup>3+</sup> | # | AA     | # | y <sup>1+</sup> | y <sup>2+</sup> | y <sup>3+</sup> |
|---------|-----------------|-----------------|-----------------|---|--------|---|-----------------|-----------------|-----------------|
|         | 88.0393         | 44.5233         | 30.0180         | 1 | S      | 9 |                 |                 |                 |
|         | 175.0713        | 88.0393         | 59.0286         | 2 | S      | 8 | 1198.2156       | 599.6114        | 400.0767        |
|         | 356.0854        | 178.5463        | 119.3666        | 3 | T[181] | 7 | 1111.1836       | 556.0954        | 371.0660        |
|         | 537.0994        | 269.0533        | 179.7046        | 4 | T[181] | 6 | 930.1696        | 465.5884        | 310.7280        |
|         | 704.0977        | 352.5525        | 235.3708        | 5 | S[167] | 5 | 749.1556        | 375.0814        | 250.3900        |
|         | 871.0961        | 436.0517        | 291.0369        | 6 | S[167] | 4 | 582.1572        | 291.5822        | 194.7239        |
|         | 1052.1101       | 526.5587        | 351.3749        | 7 | T[181] | 3 | 415.1588        | 208.0831        | 139.0578        |
|         | 1139.1421       | 570.0747        | 380.3856        | 8 | S      | 2 | 234.1448        | 117.5761        | 78.7198         |
|         |                 |                 |                 | 9 | K      | 1 | 147.1128        | 74.0600         | 49.7091         |

# Annotated spectra from Saleem et. al. 2009

K.SST<sub>181</sub>VK<sub>136</sub>DAT<sub>181</sub>IFIPAYENIK<sub>136</sub>-N/3

0.8842

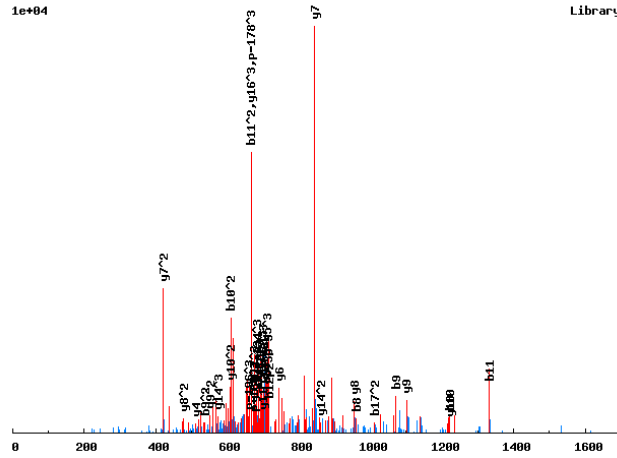

| Library | b <sup>1+</sup> | b <sup>2+</sup> | b <sup>3+</sup> | #  | AA     | #  | y <sup>1+</sup> | y <sup>2+</sup> | y <sup>3+</sup> |
|---------|-----------------|-----------------|-----------------|----|--------|----|-----------------|-----------------|-----------------|
|         | 88.0393         | 44.5233         | 30.0180         | 1  | S      | 18 |                 |                 |                 |
|         | 175.0713        | 88.0393         | 59.0286         | 2  | S      | 17 | 2085.9880       | 1043.4976       | 696.0008        |
|         | 356.0854        | 178.5463        | 119.3666        | 3  | T[181] | 16 | 1998.9559       | 999.9816        | 666.9902        |
|         | 455.1538        | 228.0805        | 152.3894        | 4  | V      | 15 | 1817.9419       | 909.4746        | 606.6522        |
|         | 591.2629        | 296.1351        | 197.7592        | 5  | K[136] | 14 | 1718.8735       | 859.9404        | 573.6294        |
|         | 706.2899        | 353.6486        | 236.1015        | 6  | D      | 13 | 1582.7644       | 791.8858        | 528.2596        |
|         | 777.3270        | 389.1671        | 259.7805        | 7  | A      | 12 | 1467.7374       | 734.3724        | 489.9173        |
|         | 958.3410        | 479.6741        | 320.1185        | 8  | T[181] | 11 | 1396.7003       | 698.8538        | 466.2383        |
|         | 1071.4250       | 536.2162        | 357.8132        | 9  | I      | 10 | 1215.6863       | 608.3468        | 405.9003        |
|         | 1218.4935       | 609.7504        | 406.8360        | 10 | F      | 9  | 1102.6022       | 551.8048        | 368.2056        |
|         | 1331.5775       | 666.2924        | 444.5307        | 11 | I      | 8  | 955.5338        | 478.2706        | 319.1828        |
|         | 1428.6303       | 714.8188        | 476.8816        | 12 | P      | 7  | 842.4498        | 421.7285        | 281.4881        |
|         | 1499.6674       | 750.3373        | 500.5606        | 13 | A      | 6  | 745.3970        | 373.2021        | 249.1372        |
|         | 1662.7307       | 831.8690        | 554.9151        | 14 | Y      | 5  | 674.3599        | 337.6836        | 225.4582        |
|         | 1791.7733       | 896.3903        | 597.9293        | 15 | E      | 4  | 511.2966        | 256.1519        | 171.1037        |
|         | 1905.8162       | 953.4118        | 635.9436        | 16 | N      | 3  | 382.2540        | 191.6306        | 128.0895        |
|         | 2018.9003       | 1009.9538       | 673.6383        | 17 | I      | 2  | 268.2111        | 134.6092        | 90.0752         |
|         |                 |                 |                 | 18 | K[136] | 1  | 155.1270        | 78.0671         | 52.3805         |

# Annotated spectra from Saleem et. al. 2009

K.SS<sub>167</sub>VALQDLIK.H/2

0.9932

1e+04

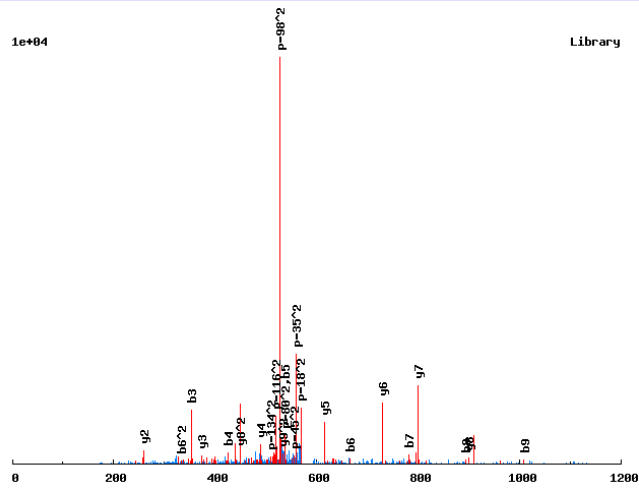

| Library | b <sup>1+</sup> | b <sup>2+</sup> | #  | AA     | #  | y <sup>1+</sup> | y <sup>2+</sup> |
|---------|-----------------|-----------------|----|--------|----|-----------------|-----------------|
|         | 88.0393         | 44.5233         | 1  | S      | 10 |                 |                 |
|         | 255.0377        | 128.0225        | 2  | S[167] | 9  | 1066.5544       | 533.7808        |
|         | 354.1061        | 177.5567        | 3  | V      | 8  | 899.5560        | 450.2817        |
|         | 425.1432        | 213.0752        | 4  | A      | 7  | 800.4876        | 400.7474        |
|         | 538.2273        | 269.6173        | 5  | L      | 6  | 729.4505        | 365.2289        |
|         | 666.2858        | 333.6466        | 6  | Q      | 5  | 616.3664        | 308.6869        |
|         | 781.3128        | 391.1600        | 7  | D      | 4  | 488.3079        | 244.6576        |
|         | 894.3968        | 447.7021        | 8  | L      | 3  | 373.2809        | 187.1441        |
|         | 1007.4809       | 504.2441        | 9  | I      | 2  | 260.1969        | 130.6021        |
|         |                 |                 | 10 | K      | 1  | 147.1128        | 74.0600         |

# Annotated spectra from Saleem et. al. 2009

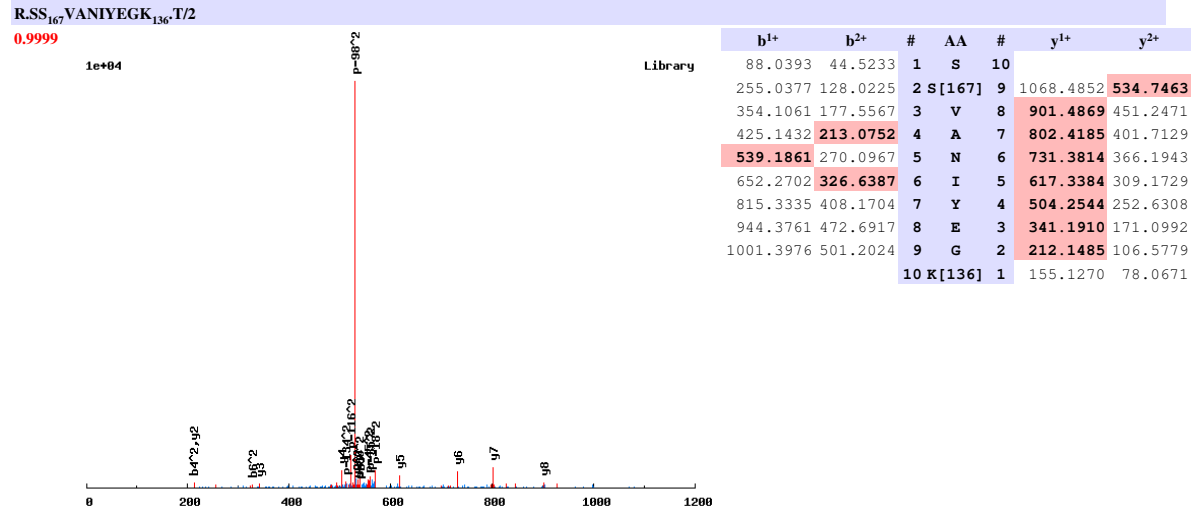

# Annotated spectra from Saleem et. al. 2009

K.STAGNNDS<sub>167</sub>R<sub>166</sub>ANS<sub>167</sub>ITVK<sub>136</sub>T/2

0.9165

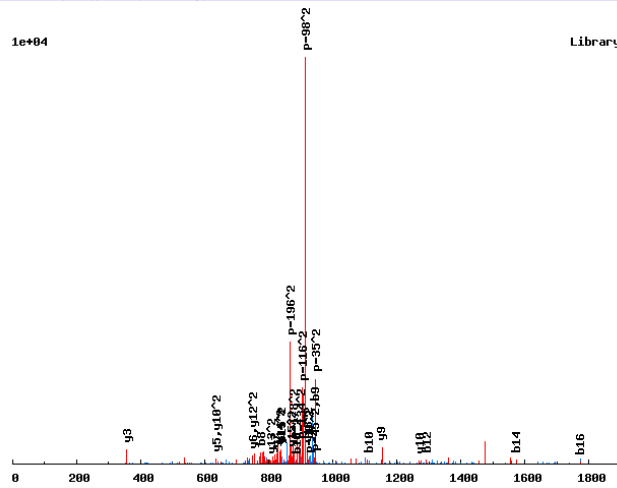

| Library | b <sup>1+</sup> | b <sup>2+</sup> | #  | AA     | #  | y <sup>1+</sup> | y <sup>2+</sup> |
|---------|-----------------|-----------------|----|--------|----|-----------------|-----------------|
|         | 88.0393         | 44.5233         | 1  | S      | 17 |                 |                 |
|         | 189.0870        | 95.0471         | 2  | T      | 16 | 1839.7753       | 920.3913        |
|         | 260.1241        | 130.5657        | 3  | A      | 15 | 1738.7276       | 869.8674        |
|         | 317.1456        | 159.0764        | 4  | G      | 14 | 1667.6905       | 834.3489        |
|         | 431.1885        | 216.0979        | 5  | N      | 13 | 1610.6690       | 805.8381        |
|         | 545.2314        | 273.1194        | 6  | N      | 12 | 1496.6261       | 748.8167        |
|         | 659.2744        | 330.1408        | 7  | N      | 11 | 1382.5832       | 691.7952        |
|         | 774.3013        | 387.6543        | 8  | D      | 10 | 1268.5402       | 634.7738        |
|         | 941.2997        | 471.1535        | 9  | S[167] | 9  | 1153.5133       | 577.2603        |
|         | 1107.4090       | 554.2082        | 10 | R[166] | 8  | 986.5149        | 493.7611        |
|         | 1178.4461       | 589.7267        | 11 | A      | 7  | 820.4056        | 410.7064        |
|         | 1292.4891       | 646.7482        | 12 | N      | 6  | 749.3684        | 375.1879        |
|         | 1459.4874       | 730.2474        | 13 | S[167] | 5  | 635.3255        | 318.1664        |
|         | 1572.5715       | 786.7894        | 14 | I      | 4  | 468.3271        | 234.6672        |
|         | 1673.6192       | 837.3132        | 15 | T      | 3  | 355.2431        | 178.1252        |
|         | 1772.6876       | 886.8474        | 16 | V      | 2  | 254.1954        | 127.6013        |
|         |                 |                 | 17 | K[136] | 1  | 155.1270        | 78.0671         |

# Annotated spectra from Saleem et. al. 2009

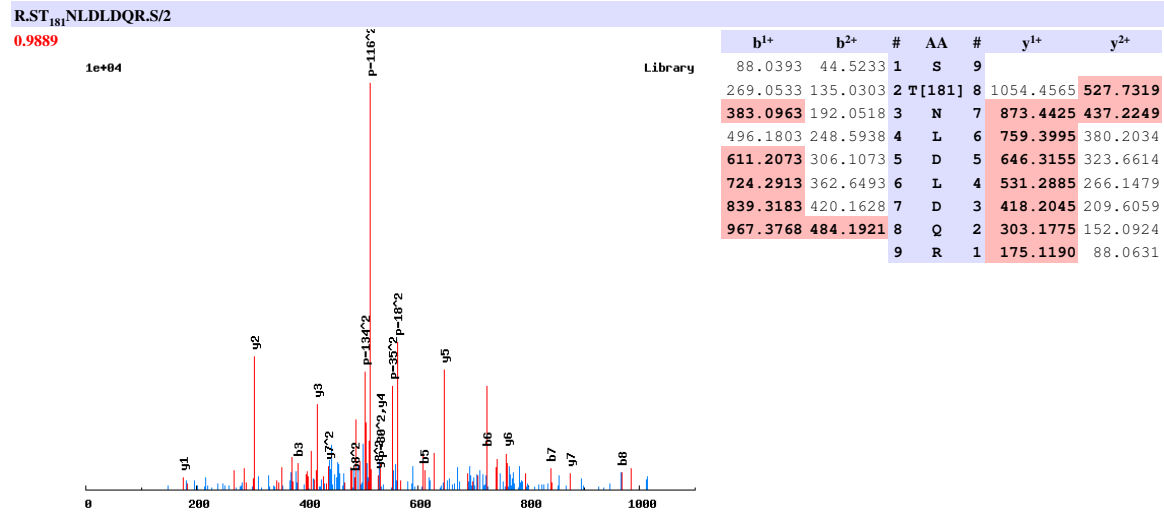

# Annotated spectra from Saleem et. al. 2009

R.ST<sub>181</sub>NYMDALNSRE/2

0.9973

1e+04

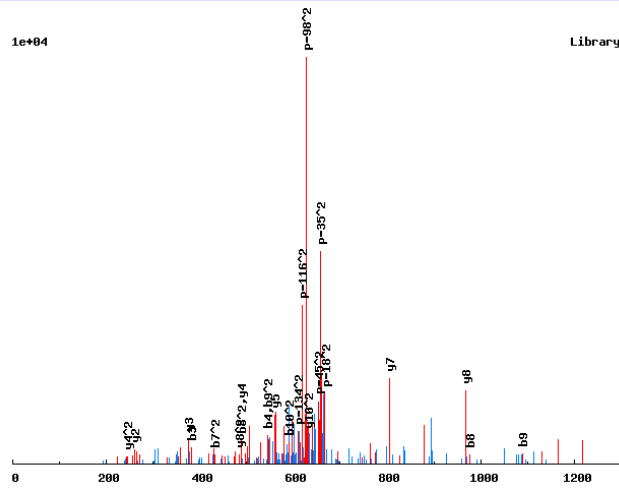

| Library | b <sup>1+</sup> | b <sup>2+</sup> | #  | AA     | #  | y <sup>1+</sup> | y <sup>2+</sup> |
|---------|-----------------|-----------------|----|--------|----|-----------------|-----------------|
|         | 88.0393         | 44.5233         | 1  | S      | 11 |                 |                 |
|         | 269.0533        | 135.0303        | 2  | T[181] | 10 | 1264.5028       | 632.7550        |
|         | 383.0963        | 192.0518        | 3  | N      | 9  | 1083.4888       | 542.2480        |
|         | 546.1596        | 273.5834        | 4  | Y      | 8  | 969.4458        | 485.2266        |
|         | 677.2001        | 339.1037        | 5  | M      | 7  | 806.3825        | 403.6949        |
|         | 792.2270        | 396.6171        | 6  | D      | 6  | 675.3420        | 338.1747        |
|         | 863.2641        | 432.1357        | 7  | A      | 5  | 560.3151        | 280.6612        |
|         | 976.3482        | 488.6777        | 8  | L      | 4  | 489.2780        | 245.1426        |
|         | 1090.3911       | 545.6992        | 9  | N      | 3  | 376.1939        | 188.6006        |
|         | 1177.4231       | 589.2152        | 10 | S      | 2  | 262.1510        | 131.5791        |
|         |                 |                 | 11 | R      | 1  | 175.1190        | 88.0631         |



# Annotated spectra from Saleem et. al. 2009

K.ST<sub>181</sub>PAAT<sub>181</sub>PAATPTPSSASP<sub>181</sub>PKK.D/3

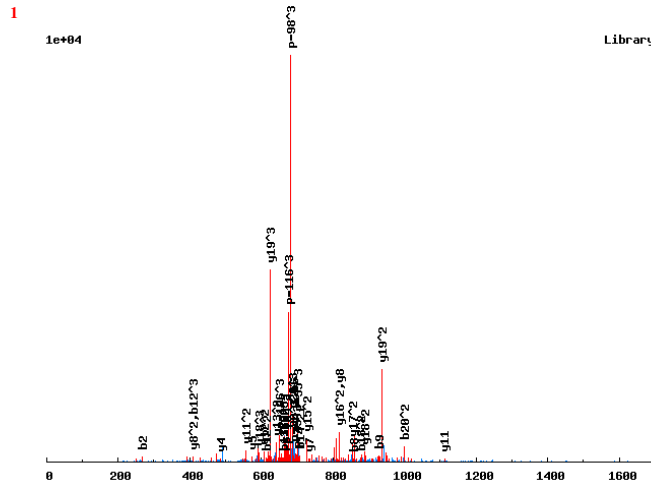

| Library | b <sup>1+</sup> | b <sup>2+</sup> | b <sup>3+</sup> | #  | AA     | #  | y <sup>1+</sup>  | y <sup>2+</sup> | y <sup>3+</sup> |
|---------|-----------------|-----------------|-----------------|----|--------|----|------------------|-----------------|-----------------|
|         | 88.0393         | 44.5233         | 30.0180         | 1  | S      | 21 |                  |                 |                 |
|         | <b>269.0533</b> | 135.0303        | 90.3560         | 2  | T[181] | 20 | 2054.9195        | 1027.9634       | <b>685.6447</b> |
|         | 366.1061        | 183.5567        | 122.7069        | 3  | P      | 19 | 1873.9055        | <b>937.4564</b> | <b>625.3067</b> |
|         | 437.1432        | 219.0752        | 146.3859        | 4  | A      | 18 | 1776.8527        | <b>888.9300</b> | <b>592.9558</b> |
|         | 508.1803        | 254.5938        | 170.0650        | 5  | A      | 17 | 1705.8156        | <b>853.4115</b> | 569.2767        |
|         | <b>689.1943</b> | 345.1008        | 230.4030        | 6  | T[181] | 16 | 1634.7785        | <b>817.8929</b> | 545.5977        |
|         | 786.2471        | 393.6272        | 262.7539        | 7  | P      | 15 | 1453.7645        | <b>727.3859</b> | 485.2597        |
|         | <b>857.2842</b> | 429.1457        | 286.4329        | 8  | A      | 14 | 1356.7117        | 678.8595        | 452.9088        |
|         | <b>928.3213</b> | 464.6643        | 310.1120        | 9  | A      | 13 | 1285.6746        | <b>643.3410</b> | 429.2297        |
|         | 1029.3690       | 515.1881        | 343.7945        | 10 | T      | 12 | 1214.6375        | <b>607.8224</b> | 405.5507        |
|         | 1126.4217       | 563.7145        | 376.1454        | 11 | P      | 11 | <b>1113.5898</b> | <b>557.2986</b> | 371.8681        |
|         | 1227.4694       | <b>614.2383</b> | <b>409.8280</b> | 12 | T      | 10 | 1016.5371        | 508.7722        | 339.5172        |
|         | 1324.5222       | <b>662.7647</b> | 442.1789        | 13 | P      | 9  | 915.4894         | 458.2483        | 305.8347        |
|         | 1411.5542       | <b>706.2807</b> | 471.1896        | 14 | S      | 8  | <b>818.4367</b>  | <b>409.7220</b> | 273.4837        |
|         | 1498.5862       | 749.7968        | 500.2003        | 15 | S      | 7  | <b>731.4046</b>  | 366.2060        | 244.4731        |
|         | 1569.6233       | 785.3153        | 523.8793        | 16 | A      | 6  | 644.3726         | 322.6899        | 215.4624        |
|         | 1656.6554       | 828.8313        | 552.8900        | 17 | S      | 5  | <b>573.3355</b>  | 287.1714        | 191.7833        |
|         | 1753.7081       | <b>877.3577</b> | 585.2409        | 18 | P      | 4  | <b>486.3034</b>  | 243.6554        | 162.7727        |
|         | 1867.7511       | 934.3792        | 623.2552        | 19 | N      | 3  | 389.2507         | 195.1290        | 130.4217        |
|         | 1995.8460       | <b>998.4267</b> | <b>665.9535</b> | 20 | K      | 2  | 275.2078         | 138.1075        | 92.4074         |
|         |                 |                 |                 | 21 | K      | 1  | 147.1128         | 74.0600         | 49.7091         |

# Annotated spectra from Saleem et. al. 2009

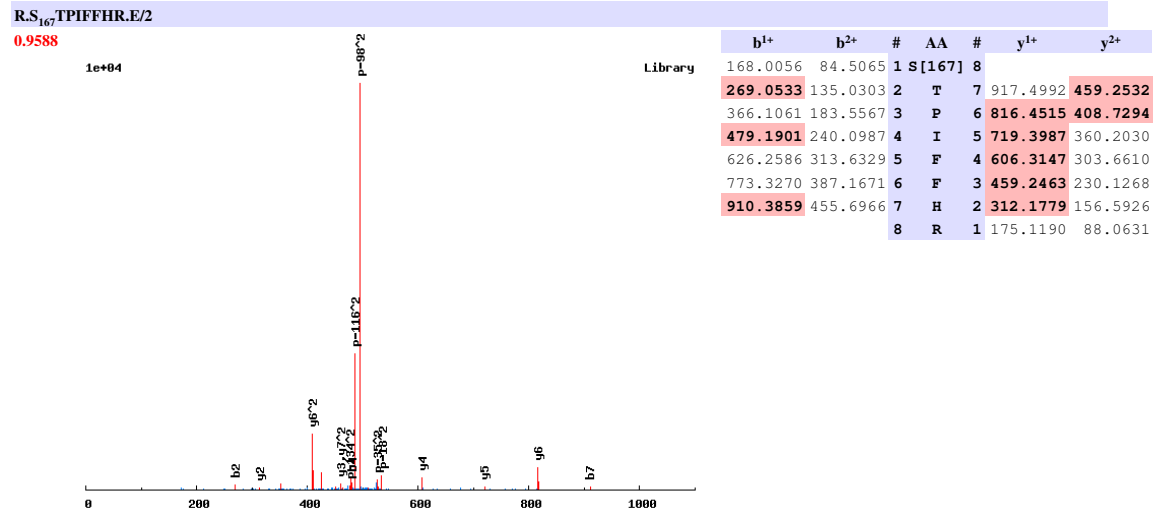

# Annotated spectra from Saleem et. al. 2009

R.STQHLST<sub>181</sub>PS<sub>167</sub>PK.N/2

0.9146

1e+04

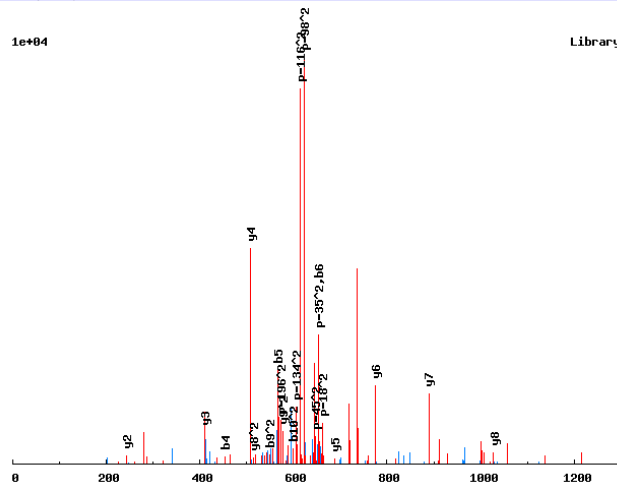

| Library | b <sup>1+</sup> | b <sup>2+</sup> | #  | AA     | #  | y <sup>1+</sup> | y <sup>2+</sup> |
|---------|-----------------|-----------------|----|--------|----|-----------------|-----------------|
|         | 88.0393         | 44.5233         | 1  | S      | 11 |                 |                 |
|         | 189.0870        | 95.0471         | 2  | T      | 10 | 1255.5120       | 628.2596        |
|         | 317.1456        | 159.0764        | 3  | Q      | 9  | 1154.4643       | 577.7358        |
|         | 454.2045        | 227.6059        | 4  | H      | 8  | 1026.4057       | 513.7065        |
|         | 567.2885        | 284.1479        | 5  | L      | 7  | 889.3468        | 445.1770        |
|         | 654.3206        | 327.6639        | 6  | S      | 6  | 776.2627        | 388.6350        |
|         | 835.3346        | 418.1709        | 7  | T[181] | 5  | 689.2307        | 345.1190        |
|         | 932.3873        | 466.6973        | 8  | P      | 4  | 508.2167        | 254.6120        |
|         | 1099.3857       | 550.1965        | 9  | S[167] | 3  | 411.1639        | 206.0856        |
|         | 1196.4385       | 598.7229        | 10 | P      | 2  | 244.1656        | 122.5864        |
|         |                 |                 | 11 | K      | 1  | 147.1128        | 74.0600         |

# Annotated spectra from Saleem et. al. 2009

R.ST<sub>181</sub>SAGNS<sub>167</sub>ITANAPVVPK<sub>136</sub>V/2

0.9984

1e+04

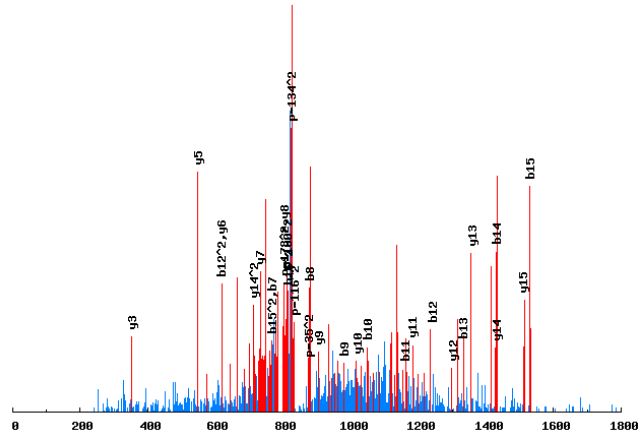

Library

| b <sup>1+</sup> | b <sup>2+</sup> | #  | AA     | #  | y <sup>1+</sup> | y <sup>2+</sup> |
|-----------------|-----------------|----|--------|----|-----------------|-----------------|
| 88.0393         | 44.5233         | 1  | S      | 17 |                 |                 |
| 269.0533        | 135.0303        | 2  | T[181] | 16 | 1694.7641       | 847.8857        |
| 356.0854        | 178.5463        | 3  | S      | 15 | 1513.7501       | 757.3787        |
| 427.1225        | 214.0649        | 4  | A      | 14 | 1426.7181       | 713.8627        |
| 484.1439        | 242.5756        | 5  | G      | 13 | 1355.6810       | 678.3441        |
| 598.1869        | 299.5971        | 6  | N      | 12 | 1298.6595       | 649.8334        |
| 765.1852        | 383.0962        | 7  | S[167] | 11 | 1184.6166       | 592.8119        |
| 878.2693        | 439.6383        | 8  | I      | 10 | 1017.6182       | 509.3128        |
| 979.3170        | 490.1621        | 9  | T      | 9  | 904.5342        | 452.7707        |
| 1050.3541       | 525.6807        | 10 | A      | 8  | 803.4865        | 402.2469        |
| 1164.3970       | 582.7021        | 11 | N      | 7  | 732.4494        | 366.7283        |
| 1235.4341       | 618.2207        | 12 | A      | 6  | 618.4064        | 309.7069        |
| 1332.4869       | 666.7471        | 13 | P      | 5  | 547.3693        | 274.1883        |
| 1431.5553       | 716.2813        | 14 | V      | 4  | 450.3166        | 225.6619        |
| 1530.6237       | 765.8155        | 15 | V      | 3  | 351.2482        | 176.1277        |
| 1627.6764       | 814.3419        | 16 | P      | 2  | 252.1798        | 126.5935        |
|                 |                 | 17 | K[136] | 1  | 155.1270        | 78.0671         |

# Annotated spectra from Saleem et. al. 2009

K.STSNLAS<sub>167</sub>PMS<sub>167</sub>SK<sub>136</sub>VDLYNSASESTR<sub>166</sub>S/3

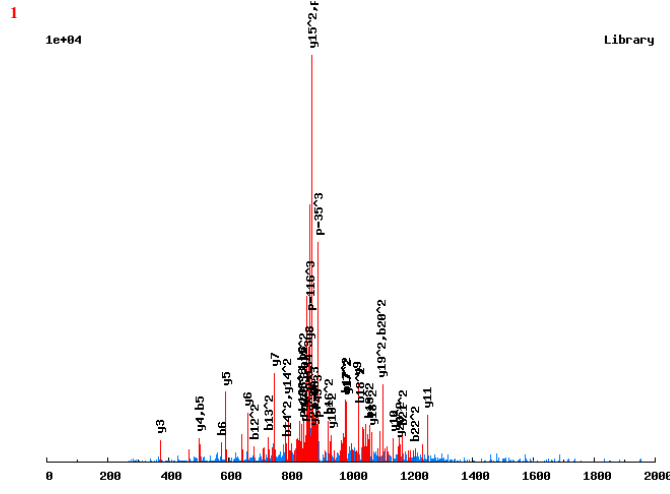

| Library | b <sup>1+</sup> | b <sup>2+</sup> | b <sup>3+</sup> | #  | AA     | #  | y <sup>1+</sup> | y <sup>2+</sup> | y <sup>3+</sup> |
|---------|-----------------|-----------------|-----------------|----|--------|----|-----------------|-----------------|-----------------|
|         | 88.0393         | 44.5233         | 30.0180         | 1  | S      | 24 |                 |                 |                 |
|         | 189.0870        | 95.0471         | 63.7005         | 2  | T      | 23 | 2623.1113       | 1312.0593       | 875.0420        |
|         | 276.1190        | 138.5631        | 92.7112         | 3  | S      | 22 | 2522.0636       | 1261.5355       | 841.3594        |
|         | 390.1619        | 195.5846        | 130.7255        | 4  | N      | 21 | 2435.0316       | 1218.0194       | 812.3487        |
|         | 503.2460        | 252.1266        | 168.4202        | 5  | L      | 20 | 2320.9887       | 1160.9980       | 774.3344        |
|         | 574.2831        | 287.6452        | 192.0992        | 6  | A      | 19 | 2207.9046       | 1104.4560       | 736.6397        |
|         | 741.2815        | 371.1444        | 247.7653        | 7  | S[167] | 18 | 2136.8675       | 1068.9374       | 712.9607        |
|         | 838.3342        | 419.6708        | 280.1163        | 8  | P      | 17 | 1969.8692       | 985.4382        | 657.2946        |
|         | 969.3747        | 485.1910        | 323.7964        | 9  | M      | 16 | 1872.8164       | 936.9118        | 624.9437        |
|         | 1136.3731       | 568.6902        | 379.4626        | 10 | S[167] | 15 | 1741.7759       | 871.3916        | 581.2635        |
|         | 1223.4051       | 612.2062        | 408.4732        | 11 | S      | 14 | 1574.7775       | 787.8924        | 525.5974        |
|         | 1359.5143       | 680.2608        | 453.8429        | 12 | K[136] | 13 | 1487.7455       | 744.3764        | 496.5867        |
|         | 1458.5827       | 729.7950        | 486.8658        | 13 | V      | 12 | 1351.6364       | 676.3218        | 451.2170        |
|         | 1573.6096       | 787.3085        | 525.2081        | 14 | D      | 11 | 1252.5679       | 626.7876        | 418.1942        |
|         | 1686.6937       | 843.8505        | 562.9028        | 15 | L      | 10 | 1137.5410       | 569.2741        | 379.8519        |
|         | 1849.7570       | 925.3822        | 617.2572        | 16 | Y      | 9  | 1024.4569       | 512.7321        | 342.1572        |
|         | 1963.8000       | 982.4036        | 655.2715        | 17 | N      | 8  | 861.3936        | 431.2004        | 287.8027        |
|         | 2050.8320       | 1025.9196       | 684.2822        | 18 | S      | 7  | 747.3507        | 374.1790        | 249.7884        |
|         | 2121.8691       | 1061.4382       | 707.9612        | 19 | A      | 6  | 660.3187        | 330.6630        | 220.7777        |
|         | 2208.9011       | 1104.9542       | 736.9719        | 20 | S      | 5  | 589.2815        | 295.1444        | 197.0987        |
|         | 2337.9437       | 1169.4755       | 779.9861        | 21 | E      | 4  | 502.2495        | 251.6284        | 168.0880        |
|         | 2424.9757       | 1212.9915       | 808.9968        | 22 | S      | 3  | 373.2069        | 187.1071        | 125.0738        |
|         | 2526.0234       | 1263.5154       | 842.6793        | 23 | T      | 2  | 286.1749        | 143.5911        | 96.0632         |
|         |                 |                 |                 | 24 | R[166] | 1  | 185.1272        | 93.0672         | 62.3806         |

# Annotated spectra from Saleem et. al. 2009

K.S<sub>167</sub>TSS<sub>167</sub>LLPLPGSSK.S/2

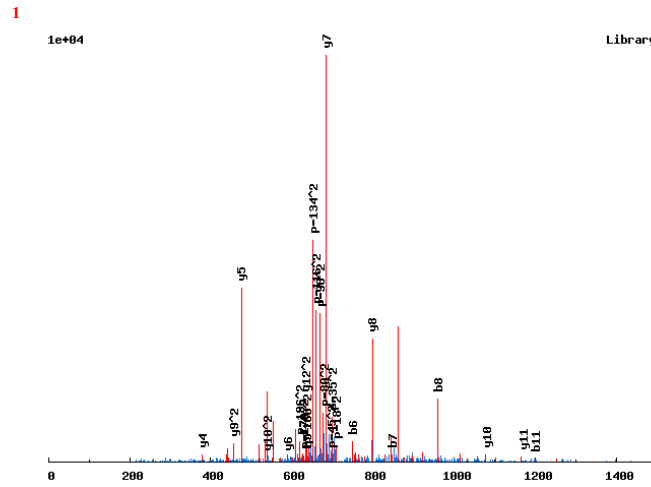

| Library | b <sup>1+</sup>  | b <sup>2+</sup> | #  | AA     | #  | y <sup>1+</sup>  | y <sup>2+</sup> |
|---------|------------------|-----------------|----|--------|----|------------------|-----------------|
|         | 168.0056         | 84.5065         | 1  | S[167] | 13 |                  |                 |
|         | 269.0533         | 135.0303        | 2  | T      | 12 | 1266.6341        | <b>633.8207</b> |
|         | 356.0854         | 178.5463        | 3  | S      | 11 | <b>1165.5864</b> | 583.2968        |
|         | 523.0837         | 262.0455        | 4  | S[167] | 10 | <b>1078.5544</b> | <b>539.7808</b> |
|         | <b>636.1678</b>  | 318.5875        | 5  | L      | 9  | 911.5560         | <b>456.2817</b> |
|         | <b>749.2518</b>  | 375.1296        | 6  | L      | 8  | <b>798.4720</b>  | 399.7396        |
|         | <b>846.3046</b>  | 423.6559        | 7  | P      | 7  | <b>685.3879</b>  | 343.1976        |
|         | <b>959.3887</b>  | 480.1980        | 8  | L      | 6  | <b>588.3351</b>  | 294.6712        |
|         | 1056.4414        | 528.7243        | 9  | P      | 5  | <b>475.2511</b>  | 238.1292        |
|         | 1113.4629        | 557.2351        | 10 | G      | 4  | <b>378.1983</b>  | 189.6028        |
|         | <b>1200.4949</b> | 600.7511        | 11 | S      | 3  | 321.1769         | 161.0921        |
|         | 1287.5269        | 644.2671        | 12 | S      | 2  | 234.1448         | 117.5761        |
|         |                  |                 | 13 | K      | 1  | 147.1128         | 74.0600         |

# Annotated spectra from Saleem et. al. 2009

K-S<sub>167</sub>TST<sub>181</sub>VNLNNHYR<sub>166</sub>-A/2

0.9937

1e+04

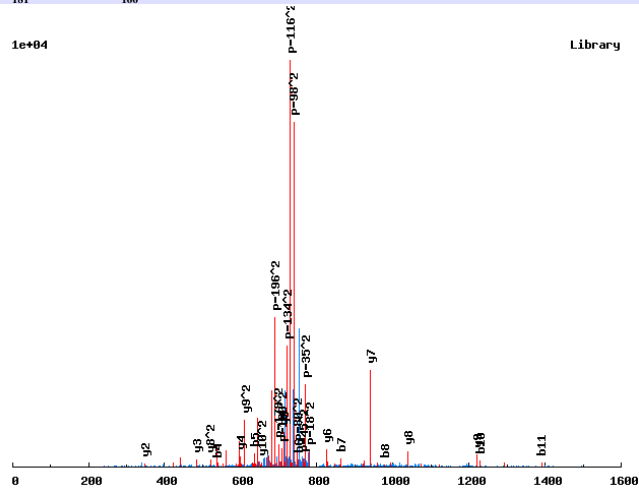

| Library | b <sup>1+</sup> | b <sup>2+</sup> | #  | AA | #     | y <sup>1+</sup> | y <sup>2+</sup>    |
|---------|-----------------|-----------------|----|----|-------|-----------------|--------------------|
|         | 168.0056        | 84.5065         | 1  | S  | [167] | 12              |                    |
|         | 269.0533        | 135.0303        | 2  | T  | 11    | 1408.6244       | 704.8159           |
|         | 356.0854        | 178.5463        | 3  | S  | 10    | 1307.5768       | 654.2920           |
|         | 537.0994        | 269.0533        | 4  | T  | [181] | 9               | 1220.5447 610.7760 |
|         | 636.1678        | 318.5875        | 5  | V  | 8     | 1039.5307       | 520.2690           |
|         | 750.2107        | 375.6090        | 6  | N  | 7     | 940.4623        | 470.7348           |
|         | 863.2948        | 432.1510        | 7  | L  | 6     | 826.4194        | 413.7133           |
|         | 977.3377        | 489.1725        | 8  | N  | 5     | 713.3353        | 357.1713           |
|         | 1091.3806       | 546.1940        | 9  | N  | 4     | 599.2924        | 300.1498           |
|         | 1228.4395       | 614.7234        | 10 | H  | 3     | 485.2495        | 243.1284           |
|         | 1391.5029       | 696.2551        | 11 | Y  | 2     | 348.1905        | 174.5989           |
|         |                 |                 | 12 | R  | [166] | 1               | 185.1272 93.0672   |

# Annotated spectra from Saleem et. al. 2009

K.S<sub>167</sub>TSVNS<sub>167</sub>LNTTSLASR.R/2

0.9999

1e+04

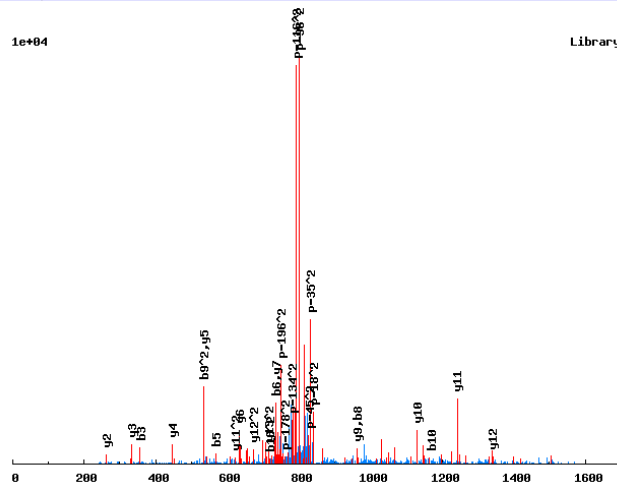

| Library | b <sup>1+</sup>  | b <sup>2+</sup> | #  | AA     | #  | y <sup>1+</sup>  | y <sup>2+</sup> |
|---------|------------------|-----------------|----|--------|----|------------------|-----------------|
|         | 168.0056         | 84.5065         | 1  | S[167] | 15 |                  |                 |
|         | 269.0533         | 135.0303        | 2  | T      | 14 | 1530.7159        | 765.8616        |
|         | <b>356.0854</b>  | 178.5463        | 3  | S      | 13 | 1429.6683        | <b>715.3378</b> |
|         | 455.1538         | 228.0805        | 4  | V      | 12 | <b>1342.6362</b> | <b>671.8218</b> |
|         | <b>569.1967</b>  | 285.1020        | 5  | N      | 11 | 1243.5678        | <b>622.2876</b> |
|         | <b>736.1951</b>  | 368.6012        | 6  | S[167] | 10 | <b>1129.5249</b> | 565.2661        |
|         | 849.2791         | 425.1432        | 7  | L      | 9  | <b>962.5265</b>  | 481.7669        |
|         | <b>963.3220</b>  | 482.1647        | 8  | N      | 8  | 849.4425         | 425.2249        |
|         | 1064.3697        | <b>532.6885</b> | 9  | T      | 7  | <b>735.3995</b>  | 368.2034        |
|         | <b>1165.4174</b> | 583.2123        | 10 | T      | 6  | <b>634.3519</b>  | 317.6796        |
|         | 1252.4494        | 626.7284        | 11 | S      | 5  | <b>533.3042</b>  | 267.1557        |
|         | 1365.5335        | 683.2704        | 12 | L      | 4  | <b>446.2722</b>  | 223.6397        |
|         | 1436.5706        | <b>718.7889</b> | 13 | A      | 3  | <b>333.1881</b>  | 167.0977        |
|         | 1523.6026        | 762.3050        | 14 | S      | 2  | <b>262.1510</b>  | 131.5791        |
|         |                  |                 | 15 | R      | 1  | 175.1190         | 88.0631         |



Annotated spectra from Saleem et. al. 2009

K.STSYGAATIGS<sub>167</sub>DEALANEKT<sub>181</sub>AGINK.M/3

0.9814

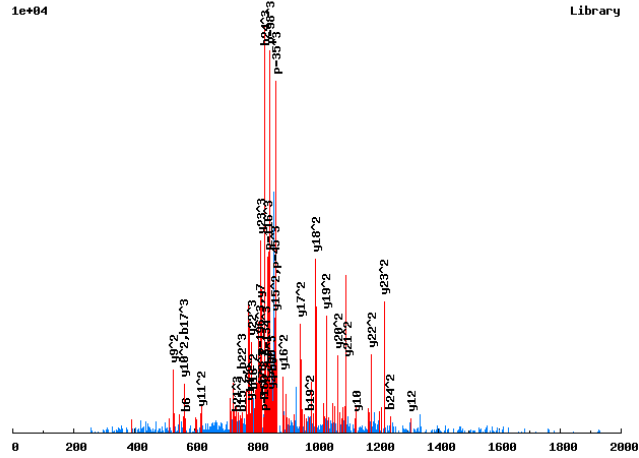

| Library | b <sup>1+</sup> | b <sup>2+</sup>  | b <sup>3+</sup> | #  | AA     | #  | y <sup>1+</sup>  | y <sup>2+</sup>  | y <sup>3+</sup> |
|---------|-----------------|------------------|-----------------|----|--------|----|------------------|------------------|-----------------|
|         | 88.0393         | 44.5233          | 30.0180         | 1  | S      | 25 |                  |                  |                 |
|         | 189.0870        | 95.0471          | 63.7005         | 2  | T      | 24 | 2542.1109        | 1271.5591        | <b>848.0418</b> |
|         | 276.1190        | 138.5631         | 92.7112         | 3  | S      | 23 | 2441.0633        | <b>1221.0353</b> | <b>814.3593</b> |
|         | 439.1823        | 220.0948         | 147.0656        | 4  | Y      | 22 | 2354.0312        | <b>1177.5193</b> | <b>785.3486</b> |
|         | 496.2038        | 248.6055         | 166.0728        | 5  | G      | 21 | 2190.9679        | <b>1095.9876</b> | 730.9942        |
|         | <b>567.2409</b> | 284.1241         | 189.7518        | 6  | A      | 20 | 2133.9464        | <b>1067.4769</b> | 711.9870        |
|         | 638.2780        | 319.6427         | 213.4309        | 7  | A      | 19 | 2062.9093        | <b>1031.9583</b> | 688.3080        |
|         | 739.3257        | 370.1665         | 247.1134        | 8  | T      | 18 | 1991.8722        | <b>996.4398</b>  | 664.6289        |
|         | <b>852.4098</b> | 426.7085         | 284.8081        | 9  | I      | 17 | 1890.8245        | <b>945.9159</b>  | 630.9464        |
|         | 909.4312        | 455.2193         | 303.8153        | 10 | G      | 16 | 1777.7405        | <b>889.3739</b>  | 593.2517        |
|         | 1076.4296       | 538.7184         | 359.4814        | 11 | S[167] | 15 | 1720.7190        | <b>860.8632</b>  | 574.2445        |
|         | 1191.4565       | 596.2319         | 397.8237        | 12 | D      | 14 | 1553.7207        | <b>777.3640</b>  | 518.5784        |
|         | 1320.4991       | 660.7532         | 440.8379        | 13 | E      | 13 | 1438.6937        | 719.8505         | 480.2361        |
|         | 1391.5362       | 696.2718         | 464.5169        | 14 | A      | 12 | <b>1309.6511</b> | 655.3292         | 437.2219        |
|         | 1504.6203       | <b>752.8138</b>  | 502.2116        | 15 | L      | 11 | 1238.6140        | <b>619.8107</b>  | 413.5429        |
|         | 1575.6574       | <b>788.3323</b>  | 525.8907        | 16 | A      | 10 | <b>1125.5300</b> | <b>563.2686</b>  | 375.8482        |
|         | 1689.7003       | <b>845.3538</b>  | <b>563.9050</b> | 17 | N      | 9  | 1054.4929        | <b>527.7501</b>  | 352.1691        |
|         | 1818.7429       | 909.8751         | 606.9192        | 18 | E      | 8  | 940.4499         | 470.7286         | 314.1548        |
|         | 1946.8379       | <b>973.9226</b>  | 649.6175        | 19 | K      | 7  | <b>811.4073</b>  | 406.2073         | 271.1406        |
|         | 2127.8519       | 1064.4296        | 709.9555        | 20 | T[181] | 6  | 683.3124         | 342.1598         | 228.4423        |
|         | 2198.8890       | 1099.9481        | <b>733.6345</b> | 21 | A      | 5  | 502.2984         | 251.6528         | 168.1043        |
|         | 2255.9105       | 1128.4589        | <b>752.6417</b> | 22 | G      | 4  | 431.2612         | 216.1343         | 144.4253        |
|         | 2368.9945       | 1185.0009        | 790.3364        | 23 | I      | 3  | 374.2398         | 187.6235         | 125.4181        |
|         | 2483.0375       | <b>1242.0224</b> | <b>828.3507</b> | 24 | N      | 2  | 261.1557         | 131.0815         | 87.7234         |
|         |                 |                  |                 | 25 | K      | 1  | 147.1128         | 74.0600          | 49.7091         |

# Annotated spectra from Saleem et. al. 2009

R.STT<sub>181</sub>HDVGEISNNVK<sub>136</sub>-I/2

0.9089

1e+04

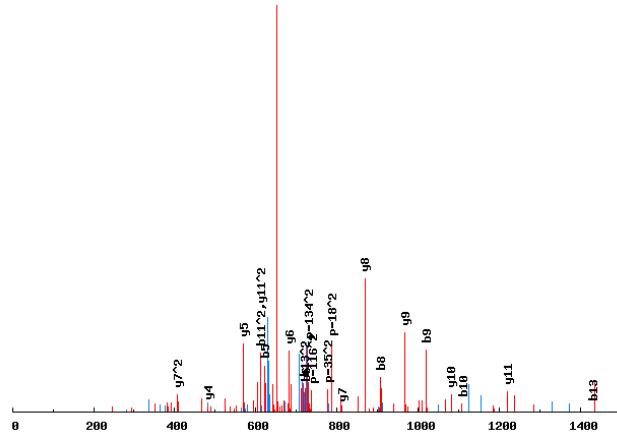

Library

| b <sup>1+</sup> | b <sup>2+</sup> | #  | AA     | #  | y <sup>1+</sup> | y <sup>2+</sup> |
|-----------------|-----------------|----|--------|----|-----------------|-----------------|
| 88.0393         | 44.5233         | 1  | S      | 14 |                 |                 |
| 189.0870        | 95.0471         | 2  | T      | 13 | 1501.6774       | 751.3423        |
| 370.1010        | 185.5541        | 3  | T[181] | 12 | 1400.6297       | 700.8185        |
| 507.1599        | 254.0836        | 4  | H      | 11 | 1219.6157       | 610.3115        |
| 622.1869        | 311.5971        | 5  | D      | 10 | 1082.5568       | 541.7820        |
| 721.2553        | 361.1313        | 6  | V      | 9  | 967.5298        | 484.2685        |
| 778.2767        | 389.6420        | 7  | G      | 8  | 868.4614        | 434.7343        |
| 907.3193        | 454.1633        | 8  | E      | 7  | 811.4399        | 406.2236        |
| 1020.4034       | 510.7053        | 9  | I      | 6  | 682.3974        | 341.7023        |
| 1107.4354       | 554.2213        | 10 | S      | 5  | 569.3133        | 285.1603        |
| 1221.4783       | 611.2428        | 11 | N      | 4  | 482.2813        | 241.6443        |
| 1335.5213       | 668.2643        | 12 | N      | 3  | 368.2383        | 184.6228        |
| 1434.5897       | 717.7985        | 13 | V      | 2  | 254.1954        | 127.6013        |
|                 |                 |    | K[136] | 1  | 155.1270        | 78.0671         |

Annotated spectra from Saleem et. al. 2009

R.STTNQS<sub>167</sub>PVS<sub>167</sub>DHASPISTDQDLIYK.L/3

0.9149

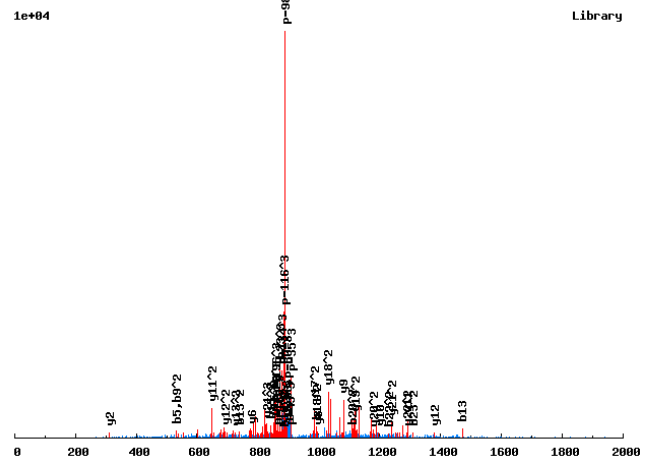

| Library | b <sup>1+</sup> | b <sup>2+</sup> | b <sup>3+</sup> | #  | AA     | #  | y <sup>1+</sup> | y <sup>2+</sup> | y <sup>3+</sup> |
|---------|-----------------|-----------------|-----------------|----|--------|----|-----------------|-----------------|-----------------|
|         | 88.0393         | 44.5233         | 30.0180         | 1  | S      | 24 |                 |                 |                 |
|         | 189.0870        | 95.0471         | 63.7005         | 2  | T      | 23 | 2677.1430       | 1339.0751       | 893.0525        |
|         | 290.1347        | 145.5710        | 97.3831         | 3  | T      | 22 | 2576.0953       | 1288.5513       | 859.3700        |
|         | 404.1776        | 202.5924        | 135.3974        | 4  | N      | 21 | 2475.0476       | 1238.0275       | 825.6874        |
|         | 532.2362        | 266.6217        | 178.0836        | 5  | Q      | 20 | 2361.0047       | 1181.0060       | 787.6731        |
|         | 699.2345        | 350.1209        | 233.7497        | 6  | S[167] | 19 | 2232.9461       | 1116.9767       | 744.9869        |
|         | 796.2873        | 398.6473        | 266.1006        | 7  | P      | 18 | 2065.9478       | 1033.4775       | 689.3208        |
|         | 895.3557        | 448.1815        | 299.1234        | 8  | V      | 17 | 1968.8950       | 984.9511        | 656.9699        |
|         | 1062.3541       | 531.6807        | 354.7895        | 9  | S[167] | 16 | 1869.8266       | 935.4169        | 623.9471        |
|         | 1177.3810       | 589.1941        | 393.1319        | 10 | D      | 15 | 1702.8282       | 851.9178        | 568.2809        |
|         | 1314.4399       | 657.7236        | 438.8182        | 11 | H      | 14 | 1587.8013       | 794.4043        | 529.9386        |
|         | 1385.4770       | 693.2422        | 462.4972        | 12 | A      | 13 | 1450.7424       | 725.8748        | 484.2523        |
|         | 1472.5091       | 736.7582        | 491.5079        | 13 | S      | 12 | 1379.7053       | 690.3563        | 460.5733        |
|         | 1569.5618       | 785.2846        | 523.8588        | 14 | P      | 11 | 1292.6732       | 646.8403        | 431.5626        |
|         | 1682.6459       | 841.8266        | 561.5535        | 15 | I      | 10 | 1195.6205       | 598.3139        | 399.2117        |
|         | 1769.6779       | 885.3426        | 590.5642        | 16 | S      | 9  | 1082.5364       | 541.7718        | 361.5170        |
|         | 1870.7256       | 935.8664        | 624.2467        | 17 | T      | 8  | 995.5044        | 498.2558        | 332.5063        |
|         | 1985.7525       | 993.3799        | 662.5890        | 18 | D      | 7  | 894.4567        | 447.7320        | 298.8238        |
|         | 2113.8111       | 1057.4092       | 705.2752        | 19 | Q      | 6  | 779.4298        | 390.2185        | 260.4814        |
|         | 2228.8381       | 1114.9227       | 743.6175        | 20 | D      | 5  | 651.3712        | 326.1892        | 217.7953        |
|         | 2341.9221       | 1171.4647       | 781.3122        | 21 | L      | 4  | 536.3443        | 268.6758        | 179.4529        |
|         | 2455.0062       | 1228.0067       | 819.0069        | 22 | I      | 3  | 423.2602        | 212.1337        | 141.7582        |
|         | 2618.0695       | 1309.5384       | 873.3614        | 23 | Y      | 2  | 310.1761        | 155.5917        | 104.0636        |
|         |                 |                 |                 | 24 | K      | 1  | 147.1128        | 74.0600         | 49.7091         |

# Annotated spectra from Saleem et. al. 2009

R.STT<sub>181</sub>PS<sub>167</sub>HSGTPQLGPR<sub>166</sub>H/3

0.9843

1e+04

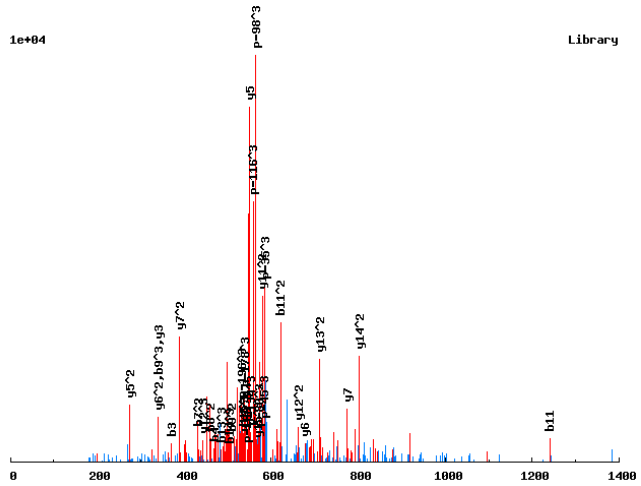

| Library | b <sup>1+</sup> | b <sup>2+</sup> | b <sup>3+</sup> | #  | AA     | #  | y <sup>1+</sup> | y <sup>2+</sup> | y <sup>3+</sup> |
|---------|-----------------|-----------------|-----------------|----|--------|----|-----------------|-----------------|-----------------|
|         | 88.0393         | 44.5233         | 30.0180         | 1  | S      | 16 |                 |                 |                 |
|         | 189.0870        | 95.0471         | 63.7005         | 2  | T      | 15 | 1702.7225       | 851.8649        | 568.2457        |
|         | 370.1010        | 185.5541        | 124.0385        | 3  | T[181] | 14 | 1601.6748       | 801.3410        | 534.5631        |
|         | 467.1538        | 234.0805        | 156.3894        | 4  | P      | 13 | 1420.6608       | 710.8340        | 474.2251        |
|         | 634.1521        | 317.5797        | 212.0556        | 5  | S[167] | 12 | 1323.6080       | 662.3077        | 441.8742        |
|         | 771.2110        | 386.1092        | 257.7419        | 6  | H      | 11 | 1156.6097       | 578.8085        | 386.2081        |
|         | 858.2431        | 429.6252        | 286.7525        | 7  | S      | 10 | 1019.5508       | 510.2790        | 340.5218        |
|         | 915.2645        | 458.1359        | 305.7597        | 8  | G      | 9  | 932.5187        | 466.7630        | 311.5111        |
|         | 1016.3122       | 508.6597        | 339.4423        | 9  | T      | 8  | 875.4973        | 438.2523        | 292.5039        |
|         | 1113.3650       | 557.1861        | 371.7932        | 10 | P      | 7  | 774.4496        | 387.7284        | 258.8214        |
|         | 1241.4235       | 621.2154        | 414.4794        | 11 | Q      | 6  | 677.3968        | 339.2021        | 226.4705        |
|         | 1338.4763       | 669.7418        | 446.8303        | 12 | P      | 5  | 549.3383        | 275.1728        | 183.7843        |
|         | 1451.5604       | 726.2838        | 484.5250        | 13 | L      | 4  | 452.2855        | 226.6464        | 151.4334        |
|         | 1508.5818       | 754.7946        | 503.5321        | 14 | G      | 3  | 339.2014        | 170.1044        | 113.7387        |
|         | 1605.6346       | 803.3209        | 535.8830        | 15 | P      | 2  | 282.1800        | 141.5936        | 94.7315         |
|         |                 |                 |                 | 16 | R[166] | 1  | 185.1272        | 93.0672         | 62.3806         |

# Annotated spectra from Saleem et. al. 2009

R.STT<sub>181</sub>PTS<sub>167</sub>PVSQPSHSHR.R/3

0.9999

1e+04

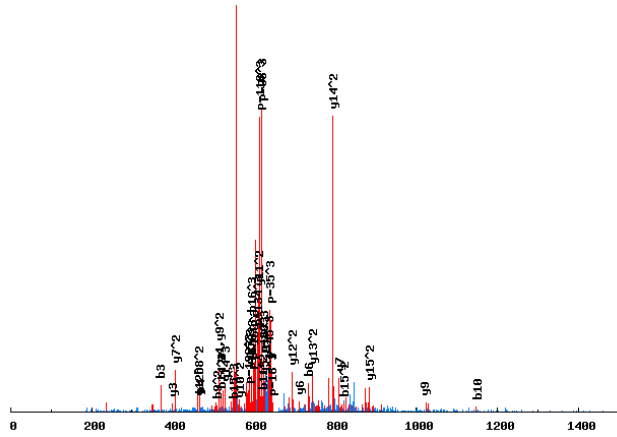

| Library | b <sup>1+</sup> | b <sup>2+</sup> | b <sup>3+</sup> | #  | AA     | #  | y <sup>1+</sup> | y <sup>2+</sup> | y <sup>3+</sup> |
|---------|-----------------|-----------------|-----------------|----|--------|----|-----------------|-----------------|-----------------|
|         | 88.0393         | 44.5233         | 30.0180         | 1  | S      | 17 |                 |                 |                 |
|         | 189.0870        | 95.0471         | 63.7005         | 2  | T      | 16 | 1867.8351       | 934.4212        | 623.2832        |
|         | 370.1010        | 185.5541        | 124.0385        | 3  | T[181] | 15 | 1766.7874       | 883.8973        | 589.6007        |
|         | 467.1538        | 234.0805        | 156.3894        | 4  | P      | 14 | 1585.7734       | 793.3903        | 529.2626        |
|         | 568.2014        | 284.6044        | 190.0720        | 5  | T      | 13 | 1488.7206       | 744.8640        | 496.9117        |
|         | 735.1998        | 368.1035        | 245.7381        | 6  | S[167] | 12 | 1387.6729       | 694.3401        | 463.2292        |
|         | 832.2526        | 416.6299        | 278.0890        | 7  | P      | 11 | 1220.6746       | 610.8409        | 407.5630        |
|         | 931.3210        | 466.1641        | 311.1118        | 8  | V      | 10 | 1123.6218       | 562.3145        | 375.2121        |
|         | 1018.3530       | 509.6801        | 340.1225        | 9  | S      | 9  | 1024.5534       | 512.7803        | 342.1893        |
|         | 1146.4116       | 573.7094        | 382.8087        | 10 | Q      | 8  | 937.5214        | 469.2643        | 313.1786        |
|         | 1243.4643       | 622.2358        | 415.1596        | 11 | P      | 7  | 809.4628        | 405.2350        | 270.4925        |
|         | 1330.4964       | 665.7518        | 444.1703        | 12 | S      | 6  | 712.4100        | 356.7087        | 238.1415        |
|         | 1443.5804       | 722.2939        | 481.8650        | 13 | I      | 5  | 625.3780        | 313.1926        | 209.1309        |
|         | 1556.6645       | 778.8359        | 519.5597        | 14 | I      | 4  | 512.2939        | 256.6506        | 171.4362        |
|         | 1643.6965       | 822.3519        | 548.5704        | 15 | S      | 3  | 399.2099        | 200.1086        | 133.7415        |
|         | 1780.7554       | 890.8814        | 594.2567        | 16 | H      | 2  | 312.1779        | 156.5926        | 104.7308        |
|         |                 |                 |                 | 17 | R      | 1  | 175.1190        | 88.0631         | 59.0445         |

Annotated spectra from Saleem et. al. 2009

K.ST<sub>181</sub>YSIQS<sub>167</sub>DDKANLGS<sub>GNVDIR</sub>.T/3

0.9996

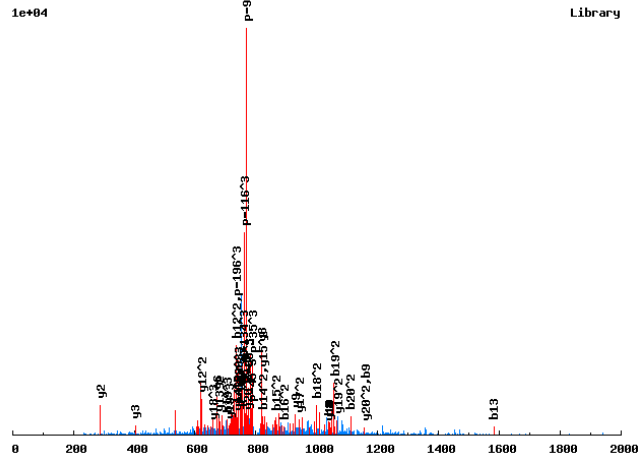

| Library | b <sup>1+</sup> | b <sup>2+</sup> | b <sup>3+</sup> | #  | AA     | #  | y <sup>1+</sup> | y <sup>2+</sup> | y <sup>3+</sup> |
|---------|-----------------|-----------------|-----------------|----|--------|----|-----------------|-----------------|-----------------|
|         | 88.0393         | 44.5233         | 30.0180         | 1  | S      | 21 |                 |                 |                 |
|         | 269.0533        | 135.0303        | 90.3560         | 2  | T[181] | 20 | 2312.9796       | 1156.9934       | 771.6647        |
|         | 432.1167        | 216.5620        | 144.7104        | 3  | Y      | 19 | 2131.9655       | 1066.4864       | 711.3267        |
|         | 519.1487        | 260.0780        | 173.7211        | 4  | S      | 18 | 1968.9022       | 984.9547        | 656.9723        |
|         | 632.2327        | 316.6200        | 211.4158        | 5  | I      | 17 | 1881.8702       | 941.4387        | 627.9616        |
|         | 760.2913        | 380.6493        | 254.1020        | 6  | Q      | 16 | 1768.7861       | 884.8967        | 590.2669        |
|         | 927.2897        | 464.1485        | 309.7681        | 7  | S[167] | 15 | 1640.7275       | 820.8674        | 547.5807        |
|         | 1042.3166       | 521.6620        | 348.1104        | 8  | D      | 14 | 1473.7292       | 737.3682        | 491.9146        |
|         | 1157.3436       | 579.1754        | 386.4527        | 9  | D      | 13 | 1358.7022       | 679.8548        | 453.5723        |
|         | 1285.4385       | 643.2229        | 429.1510        | 10 | K      | 12 | 1243.6753       | 622.3413        | 415.2300        |
|         | 1356.4756       | 678.7415        | 452.8301        | 11 | A      | 11 | 1115.5803       | 558.2938        | 372.5316        |
|         | 1470.5186       | 735.7629        | 490.8444        | 12 | N      | 10 | 1044.5432       | 522.7753        | 348.8526        |
|         | 1583.6026       | 792.3050        | 528.5391        | 13 | L      | 9  | 930.5003        | 465.7538        | 310.8383        |
|         | 1640.6241       | 820.8157        | 547.5462        | 14 | G      | 8  | 817.4162        | 409.2118        | 273.1436        |
|         | 1727.6561       | 864.3317        | 576.5569        | 15 | S      | 7  | 760.3948        | 380.7010        | 254.1364        |
|         | 1784.6776       | 892.8424        | 595.5640        | 16 | G      | 6  | 673.3628        | 337.1850        | 225.1258        |
|         | 1898.7205       | 949.8639        | 633.5784        | 17 | N      | 5  | 616.3413        | 308.6743        | 206.1186        |
|         | 1997.7889       | 999.3981        | 666.6012        | 18 | V      | 4  | 502.2984        | 251.6528        | 168.1043        |
|         | 2112.8159       | 1056.9116       | 704.9435        | 19 | D      | 3  | 403.2299        | 202.1186        | 135.0815        |
|         | 2225.8999       | 1113.4536       | 742.6382        | 20 | I      | 2  | 288.2030        | 144.6051        | 96.7392         |
|         |                 |                 |                 | 21 | R      | 1  | 175.1190        | 88.0631         | 59.0445         |

# Annotated spectra from Saleem et. al. 2009

R.SVDDYMG<sub>T181</sub>PR.A/2

0.9996

1e+04

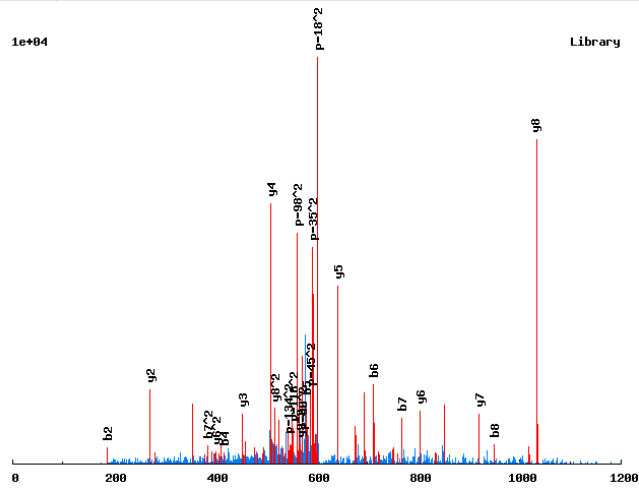

Library

| b <sup>1+</sup> | b <sup>2+</sup> | #  | AA     | #  | y <sup>1+</sup> | y <sup>2+</sup> |
|-----------------|-----------------|----|--------|----|-----------------|-----------------|
| 88.0393         | 44.5233         | 1  | S      | 10 |                 |                 |
| 187.1077        | 94.0575         | 2  | V      | 9  | 1133.4333       | 567.2203        |
| 302.1347        | 151.5710        | 3  | D      | 8  | 1034.3649       | 517.6861        |
| 417.1616        | 209.0844        | 4  | D      | 7  | 919.3379        | 460.1726        |
| 580.2249        | 290.6161        | 5  | Y      | 6  | 804.3110        | 402.6591        |
| 711.2654        | 356.1364        | 6  | M      | 5  | 641.2477        | 321.1275        |
| 768.2869        | 384.6471        | 7  | G      | 4  | 510.2072        | 255.6072        |
| 949.3009        | 475.1541        | 8  | T[181] | 3  | 453.1857        | 227.0965        |
| 1046.3537       | 523.6805        | 9  | P      | 2  | 272.1717        | 136.5895        |
|                 |                 | 10 | R      | 1  | 175.1190        | 88.0631         |

Annotated spectra from Saleem et. al. 2009

R.SVEDFMAAMQR<sub>166</sub>VS<sub>167</sub>T<sub>181</sub>QHEK<sub>136</sub>ET.-/3

0.9975

1e+04

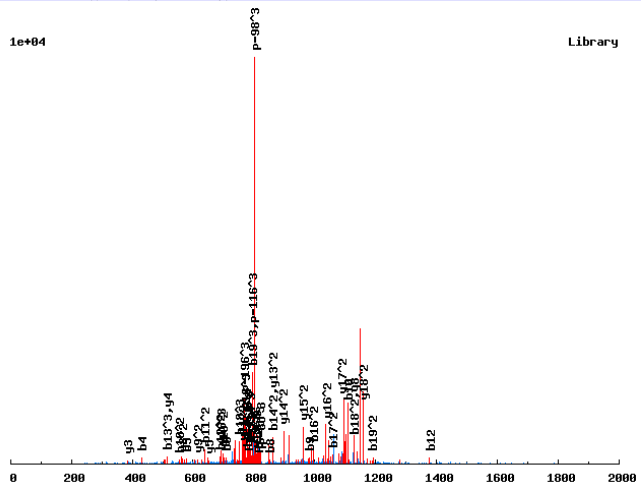

| Library | b <sup>1+</sup> | b <sup>2+</sup> | b <sup>3+</sup> | #  | AA     | #  | y <sup>1+</sup> | y <sup>2+</sup> | y <sup>3+</sup> |
|---------|-----------------|-----------------|-----------------|----|--------|----|-----------------|-----------------|-----------------|
|         | 88.0393         | 44.5233         | 30.0180         | 1  | S      | 20 |                 |                 |                 |
|         | 187.1077        | 94.0575         | 63.0408         | 2  | V      | 19 | 2414.9876       | 1207.9975       | 805.6674        |
|         | 316.1503        | 158.5788        | 106.0550        | 3  | E      | 18 | 2315.9192       | 1158.4633       | 772.6446        |
|         | 431.1772        | 216.0923        | 144.3973        | 4  | D      | 17 | 2186.8766       | 1093.9420       | 729.6304        |
|         | 578.2457        | 289.6265        | 193.4201        | 5  | F      | 16 | 2071.8497       | 1036.4285       | 691.2881        |
|         | 709.2861        | 355.1467        | 237.1002        | 6  | M      | 15 | 1924.7813       | 962.8943        | 642.2653        |
|         | 780.3233        | 390.6653        | 260.7793        | 7  | A      | 14 | 1793.7408       | 897.3740        | 598.5851        |
|         | 851.3604        | 426.1838        | 284.4583        | 8  | A      | 13 | 1722.7037       | 861.8555        | 574.9061        |
|         | 982.4009        | 491.7041        | 328.1385        | 9  | M      | 12 | 1651.6666       | 826.3369        | 551.2270        |
|         | 1110.4594       | 555.7334        | 370.8247        | 10 | Q      | 11 | 1520.6261       | 760.8167        | 507.5469        |
|         | 1276.5688       | 638.7880        | 426.1945        | 11 | R[166] | 10 | 1392.5675       | 696.7874        | 464.8607        |
|         | 1375.6372       | 688.3223        | 459.2173        | 12 | V      | 9  | 1226.4581       | 613.7327        | 409.4909        |
|         | 1542.6356       | 771.8214        | 514.8834        | 13 | S[167] | 8  | 1127.3897       | 564.1985        | 376.4681        |
|         | 1723.6496       | 862.3284        | 575.2214        | 14 | T[181] | 7  | 960.3914        | 480.6993        | 320.8020        |
|         | 1851.7082       | 926.3577        | 617.9076        | 15 | Q      | 6  | 779.3773        | 390.1923        | 260.4640        |
|         | 1988.7671       | 994.8872        | 663.5939        | 16 | H      | 5  | 651.3188        | 326.1630        | 217.7778        |
|         | 2117.8097       | 1059.4085       | 706.6081        | 17 | E      | 4  | 514.2599        | 257.6336        | 172.0915        |
|         | 2253.9188       | 1127.4631       | 751.9778        | 18 | K[136] | 3  | 385.2173        | 193.1123        | 129.0773        |
|         | 2382.9614       | 1191.9844       | 794.9920        | 19 | E      | 2  | 249.1081        | 125.0577        | 83.7076         |
|         |                 |                 |                 | 20 | T      | 1  | 120.0655        | 60.5364         | 40.6934         |



# Annotated spectra from Saleem et. al. 2009

K.SVESDLHEHS<sub>167</sub>PDNLYDLAAR.A/3

0.9999

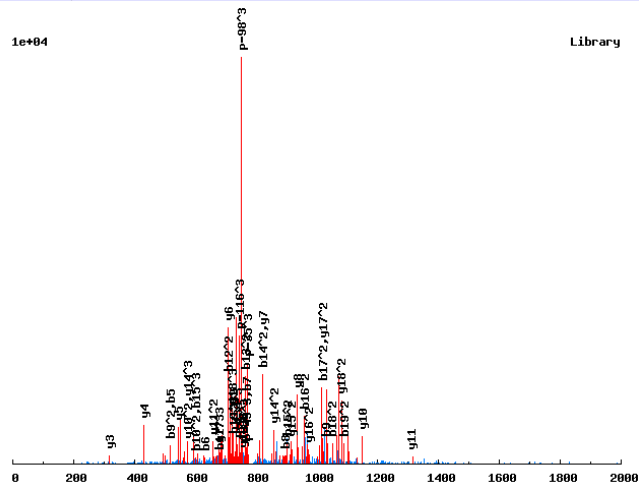

| Library | b <sup>1+</sup>  | b <sup>2+</sup>  | b <sup>3+</sup> | #  | AA     | #  | y <sup>1+</sup>  | y <sup>2+</sup>  | y <sup>3+</sup> |
|---------|------------------|------------------|-----------------|----|--------|----|------------------|------------------|-----------------|
|         | 88.0393          | 44.5233          | 30.0180         | 1  | S      | 20 |                  |                  |                 |
|         | 187.1077         | 94.0575          | 63.0408         | 2  | V      | 19 | 2260.9870        | 1130.9971        | <b>754.3339</b> |
|         | 316.1503         | 158.5788         | 106.0550        | 3  | E      | 18 | 2161.9186        | <b>1081.4629</b> | <b>721.3110</b> |
|         | 403.1823         | 202.0948         | 135.0656        | 4  | S      | 17 | 2032.8760        | <b>1016.9416</b> | <b>678.2969</b> |
|         | <b>518.2093</b>  | 259.6083         | 173.4079        | 5  | D      | 16 | 1945.8440        | <b>973.4256</b>  | 649.2862        |
|         | <b>631.2933</b>  | 316.1503         | 211.1026        | 6  | L      | 15 | 1830.8170        | <b>915.9122</b>  | 610.9439        |
|         | <b>768.3523</b>  | 384.6798         | 256.7889        | 7  | H      | 14 | 1717.7330        | <b>859.3701</b>  | <b>573.2492</b> |
|         | <b>897.3948</b>  | 449.2011         | 299.8031        | 8  | E      | 13 | 1580.6741        | 790.8407         | 527.5629        |
|         | <b>1034.4538</b> | 517.7305         | 345.4894        | 9  | H      | 12 | 1451.6315        | <b>726.3194</b>  | 484.5487        |
|         | 1201.4521        | <b>601.2297</b>  | 401.1556        | 10 | S[167] | 11 | <b>1314.5726</b> | <b>657.7899</b>  | 438.8624        |
|         | 1298.5049        | 649.7561         | 433.5065        | 11 | P      | 10 | <b>1147.5742</b> | <b>574.2907</b>  | 383.1962        |
|         | 1413.5318        | <b>707.2695</b>  | 471.8488        | 12 | D      | 9  | 1050.5214        | 525.7644         | 350.8453        |
|         | 1527.5747        | <b>764.2910</b>  | 509.8631        | 13 | N      | 8  | <b>935.4945</b>  | 468.2509         | 312.5030        |
|         | 1640.6588        | <b>820.8330</b>  | 547.5578        | 14 | L      | 7  | <b>821.4516</b>  | 411.2294         | 274.4887        |
|         | 1803.7221        | <b>902.3647</b>  | <b>601.9122</b> | 15 | Y      | 6  | <b>708.3675</b>  | 354.6874         | 236.7940        |
|         | 1918.7491        | <b>959.8782</b>  | 640.2545        | 16 | D      | 5  | <b>545.3042</b>  | 273.1557         | 182.4396        |
|         | 2031.8331        | <b>1016.4202</b> | <b>677.9492</b> | 17 | L      | 4  | <b>430.2772</b>  | 215.6423         | 144.0973        |
|         | 2102.8702        | <b>1051.9388</b> | 701.6283        | 18 | A      | 3  | <b>317.1932</b>  | 159.1002         | 106.4026        |
|         | 2173.9074        | <b>1087.4573</b> | <b>725.3073</b> | 19 | A      | 2  | 246.1561         | 123.5817         | 82.7235         |
|         |                  |                  |                 | 20 | R      | 1  | 175.1190         | 88.0631          | 59.0445         |

# Annotated spectra from Saleem et. al. 2009

K-S<sub>167</sub>VHFDQAAPVK.Y/2

0.999

1e+04

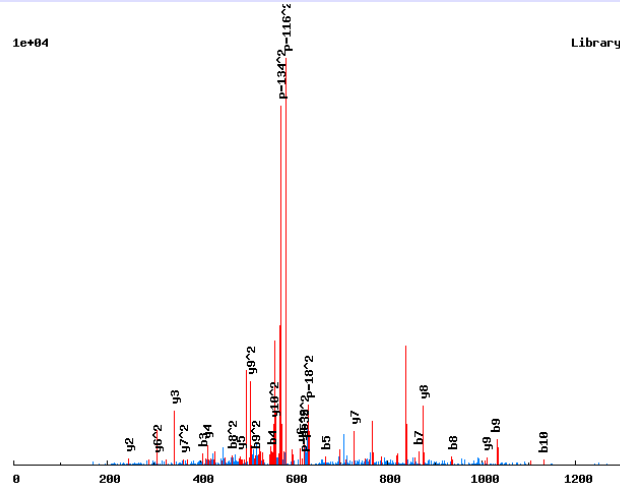

| Library | b <sup>1+</sup> | b <sup>2+</sup> | #  | AA      | #  | y <sup>1+</sup> | y <sup>2+</sup> |
|---------|-----------------|-----------------|----|---------|----|-----------------|-----------------|
|         | 168.0056        | 84.5065         | 1  | S [167] | 11 |                 |                 |
|         | 267.0741        | 134.0407        | 2  | V       | 10 | 1111.5894       | 556.2984        |
|         | 404.1330        | 202.5701        | 3  | H       | 9  | 1012.5210       | 506.7642        |
|         | 551.2014        | 276.1043        | 4  | F       | 8  | 875.4621        | 438.2347        |
|         | 666.2283        | 333.6178        | 5  | D       | 7  | 728.3937        | 364.7005        |
|         | 794.2869        | 397.6471        | 6  | Q       | 6  | 613.3668        | 307.1870        |
|         | 865.3240        | 433.1656        | 7  | A       | 5  | 485.3082        | 243.1577        |
|         | 936.3611        | 468.6842        | 8  | A       | 4  | 414.2711        | 207.6392        |
|         | 1033.4139       | 517.2106        | 9  | P       | 3  | 343.2340        | 172.1206        |
|         | 1132.4823       | 566.7448        | 10 | V       | 2  | 246.1812        | 123.5942        |
|         |                 |                 | 11 | K       | 1  | 147.1128        | 74.0600         |

# Annotated spectra from Saleem et. al. 2009

R.S<sub>167</sub>VS<sub>167</sub>AMGHPAVER.Y/2

0.999

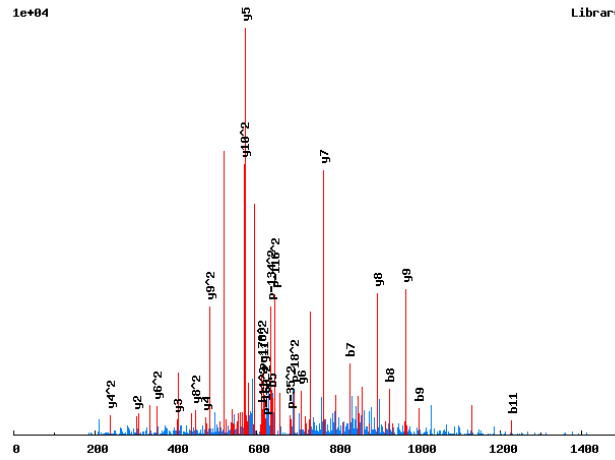

| Library | b <sup>1+</sup> | b <sup>2+</sup> | #  | AA      | #  | y <sup>1+</sup> | y <sup>2+</sup> |
|---------|-----------------|-----------------|----|---------|----|-----------------|-----------------|
|         | 168.0056        | 84.5065         | 1  | S [167] | 12 |                 |                 |
|         | 267.0741        | 134.0407        | 2  | V       | 11 | 1233.5446       | 617.2759        |
|         | 434.0724        | 217.5398        | 3  | S [167] | 10 | 1134.4762       | 567.7417        |
|         | 505.1095        | 253.0584        | 4  | A       | 9  | 967.4778        | 484.2425        |
|         | 636.1500        | 318.5786        | 5  | M       | 8  | 896.4407        | 448.7240        |
|         | 693.1715        | 347.0894        | 6  | G       | 7  | 765.4002        | 383.2037        |
|         | 830.2304        | 415.6188        | 7  | H       | 6  | 708.3787        | 354.6930        |
|         | 927.2831        | 464.1452        | 8  | P       | 5  | 571.3198        | 286.1636        |
|         | 998.3203        | 499.6638        | 9  | A       | 4  | 474.2671        | 237.6372        |
|         | 1097.3887       | 549.1980        | 10 | V       | 3  | 403.2299        | 202.1186        |
|         | 1226.4313       | 613.7193        | 11 | E       | 2  | 304.1615        | 152.5844        |
|         |                 |                 | 12 | R       | 1  | 175.1190        | 88.0631         |

# Annotated spectra from Saleem et. al. 2009

R.SVS<sub>167</sub>AMGHPAVER<sub>166</sub>-Y/2

0.9996

1e+04

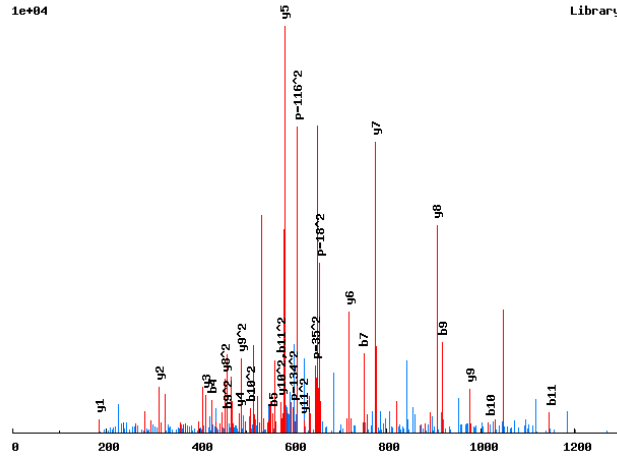

Library

| b <sup>1+</sup> | b <sup>2+</sup> | #  | AA     | #  | y <sup>1+</sup> | y <sup>2+</sup> |
|-----------------|-----------------|----|--------|----|-----------------|-----------------|
| 88.0393         | 44.5233         | 1  | S      | 12 |                 |                 |
| 187.1077        | 94.0575         | 2  | V      | 11 | 1243.5528       | 622.2801        |
| 354.1061        | 177.5567        | 3  | S[167] | 10 | 1144.4844       | 572.7459        |
| 425.1432        | 213.0752        | 4  | A      | 9  | 977.4861        | 489.2467        |
| 556.1837        | 278.5955        | 5  | M      | 8  | 906.4489        | 453.7281        |
| 613.2051        | 307.1062        | 6  | G      | 7  | 775.4085        | 388.2079        |
| 750.2641        | 375.6357        | 7  | H      | 6  | 718.3870        | 359.6971        |
| 847.3168        | 424.1620        | 8  | P      | 5  | 581.3281        | 291.1677        |
| 918.3539        | 459.6806        | 9  | A      | 4  | 484.2753        | 242.6413        |
| 1017.4223       | 509.2148        | 10 | V      | 3  | 413.2382        | 207.1227        |
| 1146.4649       | 573.7361        | 11 | E      | 2  | 314.1698        | 157.5885        |
|                 |                 | 12 | R[166] | 1  | 185.1272        | 93.0672         |

# Annotated spectra from Saleem et. al. 2009

R.SVS<sub>167</sub>DAELRR.Y/2

0.9805

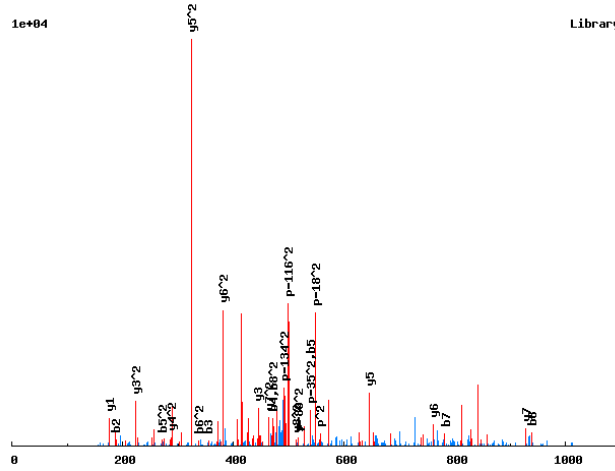

| Library | b <sup>1+</sup> | b <sup>2+</sup> | # | AA     | # | y <sup>1+</sup> | y <sup>2+</sup> |
|---------|-----------------|-----------------|---|--------|---|-----------------|-----------------|
|         | 88.0393         | 44.5233         | 1 | S      | 9 |                 |                 |
|         | 187.1077        | 94.0575         | 2 | V      | 8 | 1025.4775       | 513.2424        |
|         | 354.1061        | 177.5567        | 3 | S[167] | 7 | 926.4091        | 463.7082        |
|         | 469.1330        | 235.0702        | 4 | D      | 6 | 759.4108        | 380.2090        |
|         | 540.1701        | 270.5887        | 5 | A      | 5 | 644.3838        | 322.6956        |
|         | 669.2127        | 335.1100        | 6 | E      | 4 | 573.3467        | 287.1770        |
|         | 782.2968        | 391.6520        | 7 | L      | 3 | 444.3041        | 222.6557        |
|         | 938.3979        | 469.7026        | 8 | R      | 2 | 331.2201        | 166.1137        |
|         |                 |                 | 9 | R      | 1 | 175.1190        | 88.0631         |

# Annotated spectra from Saleem et. al. 2009

R.S<sub>167</sub>VSIDS<sub>167</sub>TKYSR.D/2

0.9778

1e+04

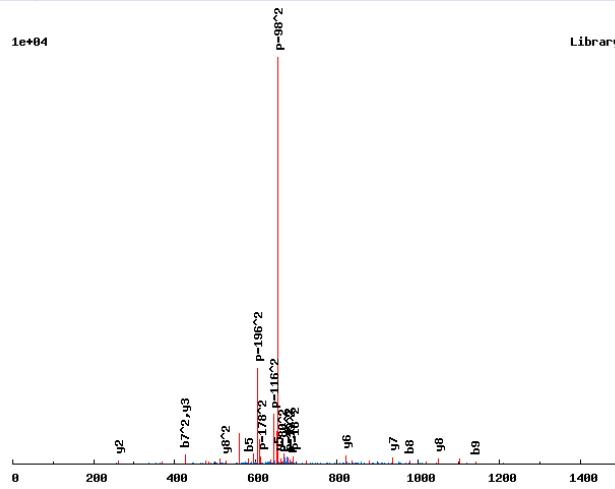

| Library | b <sup>1+</sup> | b <sup>2+</sup> | #  | AA     | #  | y <sup>1+</sup> | y <sup>2+</sup> |
|---------|-----------------|-----------------|----|--------|----|-----------------|-----------------|
|         | 168.0056        | 84.5065         | 1  | S[167] | 11 |                 |                 |
|         | 267.0741        | 134.0407        | 2  | V      | 10 | 1235.5668       | 618.2870        |
|         | 354.1061        | 177.5567        | 3  | S      | 9  | 1136.4983       | 568.7528        |
|         | 467.1901        | 234.0987        | 4  | I      | 8  | 1049.4663       | 525.2368        |
|         | 582.2171        | 291.6122        | 5  | D      | 7  | 936.3823        | 468.6948        |
|         | 749.2154        | 375.1114        | 6  | S[167] | 6  | 821.3553        | 411.1813        |
|         | 850.2631        | 425.6352        | 7  | T      | 5  | 654.3570        | 327.6821        |
|         | 978.3581        | 489.6827        | 8  | K      | 4  | 553.3093        | 277.1583        |
|         | 1141.4214       | 571.2143        | 9  | Y      | 3  | 425.2143        | 213.1108        |
|         | 1228.4534       | 614.7304        | 10 | S      | 2  | 262.1510        | 131.5791        |
|         |                 |                 | 11 | R      | 1  | 175.1190        | 88.0631         |

# Annotated spectra from Saleem et. al. 2009

R.SVS<sub>167</sub>LEDLKR.N/3

0.9987

1e+04

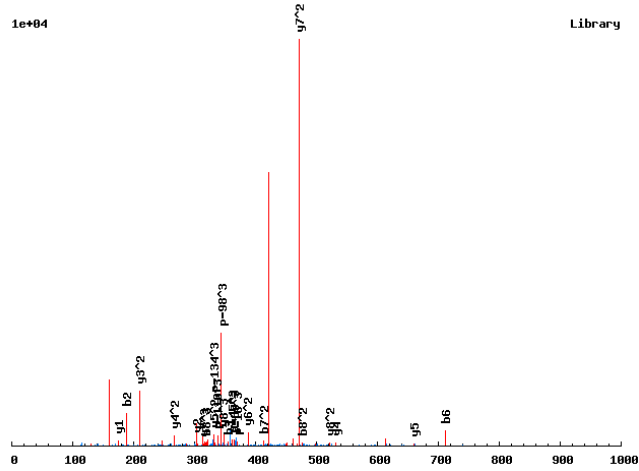

| Library | b <sup>1+</sup> | b <sup>2+</sup> | b <sup>3+</sup> | # | AA     | # | y <sup>1+</sup> | y <sup>2+</sup> | y <sup>3+</sup> |
|---------|-----------------|-----------------|-----------------|---|--------|---|-----------------|-----------------|-----------------|
|         | 88.0393         | 44.5233         | 30.0180         | 1 | S      | 9 |                 |                 |                 |
|         | 187.1077        | 94.0575         | 63.0408         | 2 | V      | 8 | 1039.5183       | 520.2628        | 347.1776        |
|         | 354.1061        | 177.5567        | 118.7069        | 3 | S[167] | 7 | 940.4499        | 470.7286        | 314.1548        |
|         | 467.1901        | 234.0987        | 156.4016        | 4 | L      | 6 | 773.4516        | 387.2294        | 258.4887        |
|         | 596.2327        | 298.6200        | 199.4158        | 5 | E      | 5 | 660.3675        | 330.6874        | 220.7940        |
|         | 711.2597        | 356.1335        | 237.7581        | 6 | D      | 4 | 531.3249        | 266.1661        | 177.7798        |
|         | 824.3437        | 412.6755        | 275.4528        | 7 | L      | 3 | 416.2980        | 208.6526        | 139.4375        |
|         | 952.4387        | 476.7230        | 318.1511        | 8 | K      | 2 | 303.2139        | 152.1106        | 101.7428        |
|         |                 |                 |                 | 9 | R      | 1 | 175.1190        | 88.0631         | 59.0445         |

Annotated spectra from Saleem et. al. 2009

K.SVS<sub>167</sub>NAS<sub>167</sub>LDTQNTFEQNVESDKNFNK.L/3

0.9935

1e+04

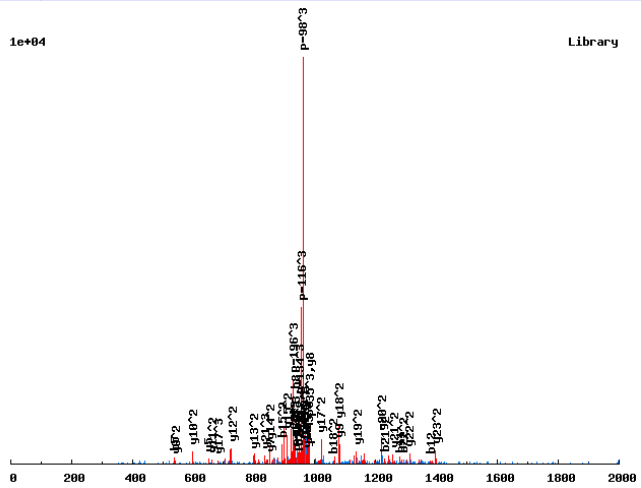

| Library | b <sup>1+</sup> | b <sup>2+</sup> | b <sup>3+</sup> | #  | AA     | #  | y <sup>1+</sup> | y <sup>2+</sup> | y <sup>3+</sup> |
|---------|-----------------|-----------------|-----------------|----|--------|----|-----------------|-----------------|-----------------|
|         | 88.0393         | 44.5233         | 30.0180         | 1  | S      | 25 |                 |                 |                 |
|         | 187.1077        | 94.0575         | 63.0408         | 2  | V      | 24 | 2889.1976       | 1445.1024       | 963.7374        |
|         | 354.1061        | 177.5567        | 118.7069        | 3  | S[167] | 23 | 2790.1291       | 1395.5682       | 930.7146        |
|         | 468.1490        | 234.5781        | 156.7212        | 4  | N      | 22 | 2623.1308       | 1312.0690       | 875.0484        |
|         | 539.1861        | 270.0967        | 180.4002        | 5  | A      | 21 | 2509.0879       | 1255.0476       | 837.0341        |
|         | 706.1845        | 353.5959        | 236.0663        | 6  | S[167] | 20 | 2438.0507       | 1219.5290       | 813.3551        |
|         | 819.2685        | 410.1379        | 273.7610        | 7  | L      | 19 | 2271.0524       | 1136.0298       | 757.6890        |
|         | 934.2955        | 467.6514        | 312.1033        | 8  | D      | 18 | 2157.9683       | 1079.4878       | 719.9943        |
|         | 1035.3432       | 518.1752        | 345.7859        | 9  | T      | 17 | 2042.9414       | 1021.9743       | 681.6520        |
|         | 1163.4017       | 582.2045        | 388.4721        | 10 | Q      | 16 | 1941.8937       | 971.4505        | 647.9694        |
|         | 1277.4447       | 639.2260        | 426.4864        | 11 | N      | 15 | 1813.8351       | 907.4212        | 605.2832        |
|         | 1378.4924       | 689.7498        | 460.1690        | 12 | T      | 14 | 1699.7922       | 850.3997        | 567.2689        |
|         | 1525.5608       | 763.2840        | 509.1918        | 13 | F      | 13 | 1598.7445       | 799.8759        | 533.5864        |
|         | 1654.6034       | 827.8053        | 552.2060        | 14 | E      | 12 | 1451.6761       | 726.3417        | 484.5636        |
|         | 1782.6619       | 891.8346        | 594.8922        | 15 | Q      | 11 | 1322.6335       | 661.8204        | 441.5494        |
|         | 1896.7049       | 948.8561        | 632.9065        | 16 | N      | 10 | 1194.5749       | 597.7911        | 398.8632        |
|         | 1995.7733       | 998.3903        | 665.9293        | 17 | V      | 9  | 1080.5320       | 540.7696        | 360.8489        |
|         | 2124.8159       | 1062.9116       | 708.9435        | 18 | E      | 8  | 981.4636        | 491.2354        | 327.8261        |
|         | 2211.8479       | 1106.4276       | 737.9542        | 19 | S      | 7  | 852.4210        | 426.7141        | 284.8119        |
|         | 2326.8748       | 1163.9411       | 776.2965        | 20 | D      | 6  | 765.3890        | 383.1981        | 255.8012        |
|         | 2454.9698       | 1227.9885       | 818.9948        | 21 | K      | 5  | 650.3620        | 325.6847        | 217.4589        |
|         | 2569.0127       | 1285.0100       | 857.0091        | 22 | N      | 4  | 522.2671        | 261.6372        | 174.7605        |
|         | 2716.0811       | 1358.5442       | 906.0319        | 23 | F      | 3  | 408.2241        | 204.6157        | 136.7462        |
|         | 2830.1241       | 1415.5657       | 944.0462        | 24 | N      | 2  | 261.1557        | 131.0815        | 87.7234         |
|         |                 |                 |                 | 25 | K      | 1  | 147.1128        | 74.0600         | 49.7091         |



# Annotated spectra from Saleem et. al. 2009

K.SVTESSPFVPSS<sub>167</sub>TPT<sub>181</sub>PVDDDR.S/3

0.9991

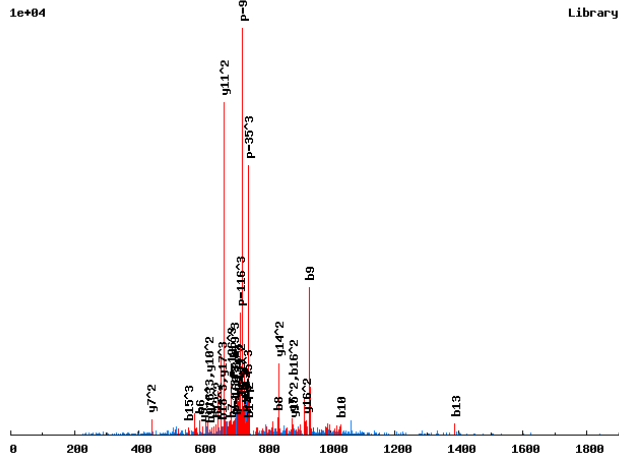

| Library | b <sup>1+</sup> | b <sup>2+</sup> | b <sup>3+</sup> | #  | AA     | #  | y <sup>1+</sup> | y <sup>2+</sup> | y <sup>3+</sup> |
|---------|-----------------|-----------------|-----------------|----|--------|----|-----------------|-----------------|-----------------|
|         | 88.0393         | 44.5233         | 30.0180         | 1  | S      | 20 |                 |                 |                 |
|         | 187.1077        | 94.0575         | 63.0408         | 2  | V      | 19 | 2177.9039       | 1089.4556       | 726.6395        |
|         | 288.1554        | 144.5813        | 96.7233         | 3  | T      | 18 | 2078.8355       | 1039.9214       | 693.6167        |
|         | 417.1980        | 209.1026        | 139.7375        | 4  | E      | 17 | 1977.7878       | 989.3976        | 659.9341        |
|         | 504.2300        | 252.6186        | 168.7482        | 5  | S      | 16 | 1848.7452       | 924.8763        | 616.9199        |
|         | 591.2621        | 296.1347        | 197.7589        | 6  | S      | 15 | 1761.7132       | 881.3602        | 587.9093        |
|         | 688.3148        | 344.6610        | 230.1098        | 7  | P      | 14 | 1674.6812       | 837.8442        | 558.8986        |
|         | 835.3832        | 418.1953        | 279.1326        | 8  | F      | 13 | 1577.6284       | 789.3179        | 526.5477        |
|         | 934.4516        | 467.7295        | 312.1554        | 9  | V      | 12 | 1430.5600       | 715.7836        | 477.5249        |
|         | 1031.5044       | 516.2558        | 344.5063        | 10 | P      | 11 | 1331.4916       | 666.2494        | 444.5021        |
|         | 1118.5364       | 559.7719        | 373.5170        | 11 | S      | 10 | 1234.4388       | 617.7231        | 412.1511        |
|         | 1285.5348       | 643.2710        | 429.1831        | 12 | S[167] | 9  | 1147.4068       | 574.2070        | 383.1405        |
|         | 1386.5825       | 693.7949        | 462.8657        | 13 | T      | 8  | 980.4085        | 490.7079        | 327.4743        |
|         | 1483.6352       | 742.3213        | 495.2166        | 14 | P      | 7  | 879.3608        | 440.1840        | 293.7918        |
|         | 1664.6492       | 832.8283        | 555.5546        | 15 | T[181] | 6  | 782.3080        | 391.6576        | 261.4409        |
|         | 1761.7020       | 881.3546        | 587.9055        | 16 | P      | 5  | 601.2940        | 301.1506        | 201.1029        |
|         | 1860.7704       | 930.8888        | 620.9283        | 17 | V      | 4  | 504.2412        | 252.6243        | 168.7519        |
|         | 1975.7973       | 988.4023        | 659.2706        | 18 | D      | 3  | 405.1728        | 203.0901        | 135.7291        |
|         | 2090.8243       | 1045.9158       | 697.6129        | 19 | D      | 2  | 290.1459        | 145.5766        | 97.3868         |
|         |                 |                 |                 | 20 | R      | 1  | 175.1190        | 88.0631         | 59.0445         |

# Annotated spectra from Saleem et. al. 2009

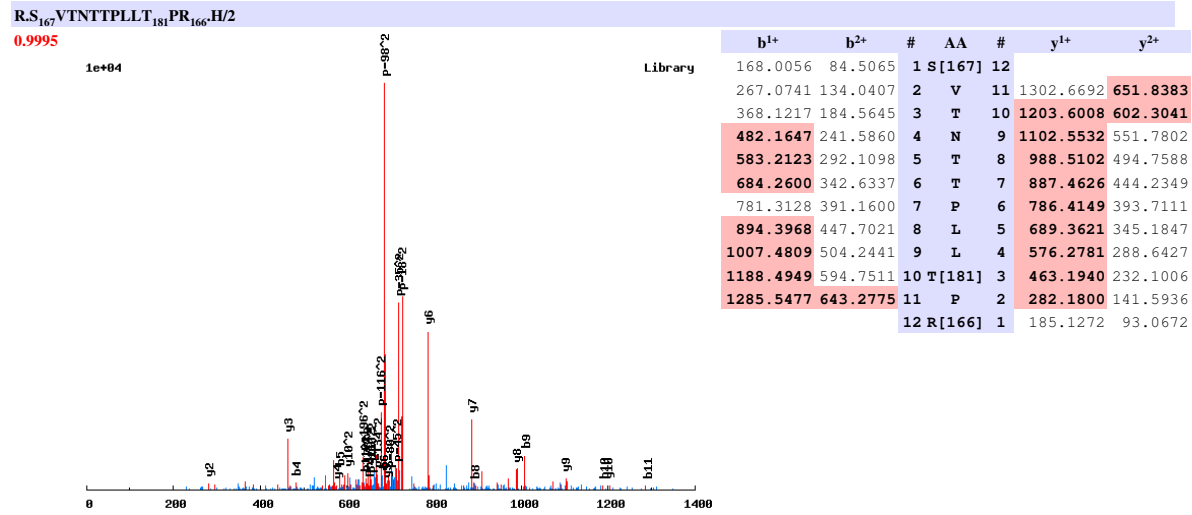

Annotated spectra from Saleem et. al. 2009

K.SYS<sub>167</sub>ANDLHMAR<sub>166</sub>S/2

0.9996

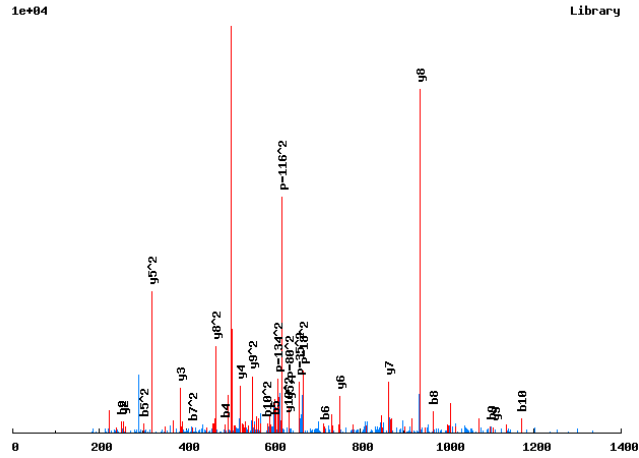

| Library | b <sup>1+</sup> | b <sup>2+</sup> | #  | AA     | #  | y <sup>1+</sup> | y <sup>2+</sup> |
|---------|-----------------|-----------------|----|--------|----|-----------------|-----------------|
|         | 88.0393         | 44.5233         | 1  | S      | 11 |                 |                 |
|         | 251.1026        | 126.0550        | 2  | Y      | 10 | 1267.5165       | 634.2619        |
|         | 418.1010        | 209.5541        | 3  | S[167] | 9  | 1104.4531       | 552.7302        |
|         | 489.1381        | 245.0727        | 4  | A      | 8  | 937.4548        | 469.2310        |
|         | 603.1810        | 302.0942        | 5  | N      | 7  | 866.4177        | 433.7125        |
|         | 718.2080        | 359.6076        | 6  | D      | 6  | 752.3747        | 376.6910        |
|         | 831.2920        | 416.1497        | 7  | L      | 5  | 637.3478        | 319.1775        |
|         | 968.3510        | 484.6791        | 8  | H      | 4  | 524.2637        | 262.6355        |
|         | 1099.3914       | 550.1994        | 9  | M      | 3  | 387.2048        | 194.1060        |
|         | 1170.4286       | 585.7179        | 10 | A      | 2  | 256.1643        | 128.5858        |
|         |                 |                 | 11 | R[166] | 1  | 185.1272        | 93.0672         |

# Annotated spectra from Saleem et. al. 2009

R.S<sub>167</sub>YSGASS<sub>167</sub>LDDPFR.V/2

0.9967

1e+04

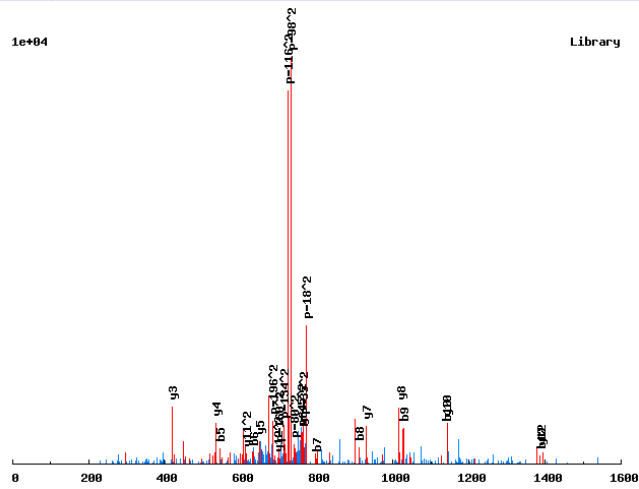

| Library | b <sup>1+</sup> | b <sup>2+</sup> | #  | AA     | #  | y <sup>1+</sup> | y <sup>2+</sup> |
|---------|-----------------|-----------------|----|--------|----|-----------------|-----------------|
|         | 168.0056        | 84.5065         | 1  | S[167] | 13 |                 |                 |
|         | 331.0690        | 166.0381        | 2  | Y      | 12 | 1394.5624       | 697.7848        |
|         | 418.1010        | 209.5541        | 3  | S      | 11 | 1231.4991       | 616.2532        |
|         | 475.1225        | 238.0649        | 4  | G      | 10 | 1144.4670       | 572.7372        |
|         | 546.1596        | 273.5834        | 5  | A      | 9  | 1087.4456       | 544.2264        |
|         | 633.1916        | 317.0994        | 6  | S      | 8  | 1016.4085       | 508.7079        |
|         | 800.1900        | 400.5986        | 7  | S[167] | 7  | 929.3764        | 465.1919        |
|         | 913.2740        | 457.1407        | 8  | L      | 6  | 762.3781        | 381.6927        |
|         | 1028.3010       | 514.6541        | 9  | D      | 5  | 649.2940        | 325.1506        |
|         | 1143.3279       | 572.1676        | 10 | D      | 4  | 534.2671        | 267.6372        |
|         | 1240.3807       | 620.6940        | 11 | P      | 3  | 419.2401        | 210.1237        |
|         | 1387.4491       | 694.2282        | 12 | F      | 2  | 322.1874        | 161.5973        |
|         |                 |                 | 13 | R      | 1  | 175.1190        | 88.0631         |

# Annotated spectra from Saleem et. al. 2009

K.SYSQS<sub>167</sub>PPR<sub>166</sub>SPGR<sub>166</sub>S<sub>167</sub>PTR<sub>166</sub>R/3

0.6011

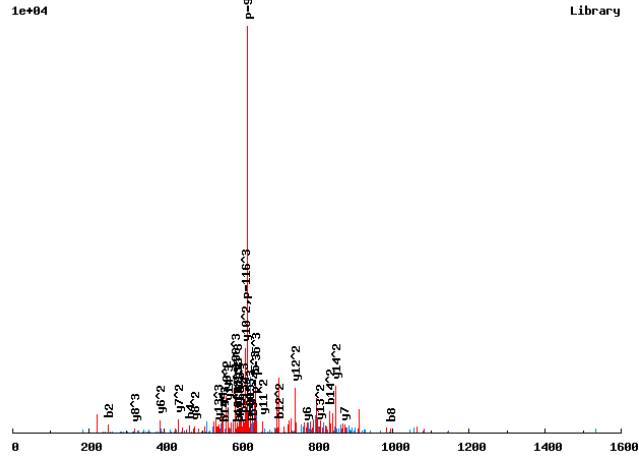

| Library | b <sup>1+</sup> | b <sup>2+</sup> | b <sup>3+</sup> | #  | AA     | #  | y <sup>1+</sup> | y <sup>2+</sup> | y <sup>3+</sup> |
|---------|-----------------|-----------------|-----------------|----|--------|----|-----------------|-----------------|-----------------|
|         | 88.0393         | 44.5233         | 30.0180         | 1  | S      | 16 |                 |                 |                 |
|         | <b>251.1026</b> | 126.0550        | 84.3724         | 2  | Y      | 15 | 1862.8088       | 931.9081        | <b>621.6078</b> |
|         | 338.1347        | 169.5710        | 113.3831        | 3  | S      | 14 | 1699.7455       | <b>850.3764</b> | <b>567.2534</b> |
|         | <b>466.1933</b> | 233.6003        | 156.0693        | 4  | Q      | 13 | 1612.7135       | <b>806.8604</b> | <b>538.2427</b> |
|         | <b>633.1916</b> | 317.0994        | 211.7354        | 5  | S[167] | 12 | 1484.6549       | <b>742.8311</b> | 495.5565        |
|         | 730.2444        | 365.6258        | 244.0863        | 6  | P      | 11 | 1317.6565       | <b>659.3319</b> | 439.8904        |
|         | 827.2971        | 414.1522        | 276.4372        | 7  | P      | 10 | 1220.6038       | <b>610.8055</b> | 407.5394        |
|         | <b>993.4065</b> | 497.2069        | 331.8070        | 8  | R[166] | 9  | 1123.5510       | <b>562.2792</b> | 375.1885        |
|         | 1080.4385       | 540.7229        | 360.8177        | 9  | S      | 8  | 957.4416        | <b>479.2245</b> | <b>319.8187</b> |
|         | 1177.4913       | <b>589.2493</b> | 393.1686        | 10 | P      | 7  | <b>870.4096</b> | <b>435.7084</b> | 290.8081        |
|         | 1234.5128       | <b>617.7600</b> | 412.1758        | 11 | G      | 6  | <b>773.3569</b> | <b>387.1821</b> | 258.4571        |
|         | 1400.6221       | <b>700.8147</b> | 467.5456        | 12 | R[166] | 5  | 716.3354        | 358.6713        | 239.4500        |
|         | 1567.6205       | 784.3139        | 523.2117        | 13 | S[167] | 4  | <b>550.2260</b> | 275.6167        | 184.0802        |
|         | 1664.6733       | <b>832.8403</b> | <b>555.5626</b> | 14 | P      | 3  | 383.2277        | 192.1175        | 128.4141        |
|         | 1765.7209       | 883.3641        | <b>589.2452</b> | 15 | T      | 2  | 286.1749        | 143.5911        | 96.0632         |
|         |                 |                 |                 | 16 | R[166] | 1  | 185.1272        | 93.0672         | 62.3806         |

# Annotated spectra from Saleem et. al. 2009

R.S<sub>167</sub>YTSVAELNRE/2

0.9997

1e+04

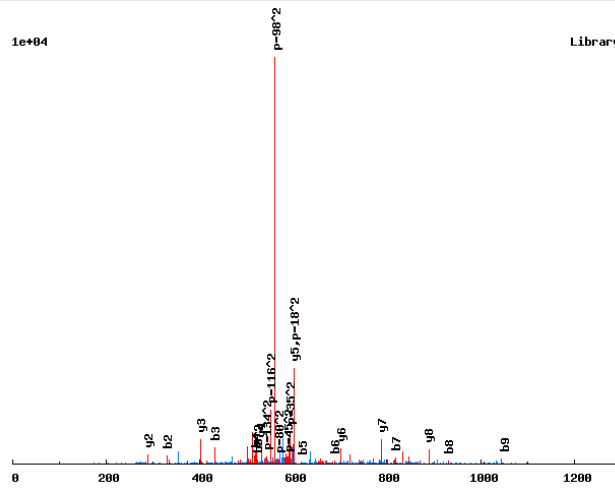

| Library | b <sup>1+</sup> | b <sup>2+</sup> | #  | AA     | #  | y <sup>1+</sup> | y <sup>2+</sup> |
|---------|-----------------|-----------------|----|--------|----|-----------------|-----------------|
|         | 168.0056        | 84.5065         | 1  | S[167] | 10 |                 |                 |
|         | 331.0690        | 166.0381        | 2  | Y      | 9  | 1052.5371       | 526.7722        |
|         | 432.1167        | 216.5620        | 3  | T      | 8  | 889.4738        | 445.2405        |
|         | 519.1487        | 260.0780        | 4  | S      | 7  | 788.4261        | 394.7167        |
|         | 618.2171        | 309.6122        | 5  | V      | 6  | 701.3940        | 351.2007        |
|         | 689.2542        | 345.1307        | 6  | A      | 5  | 602.3256        | 301.6665        |
|         | 818.2968        | 409.6520        | 7  | E      | 4  | 531.2885        | 266.1479        |
|         | 931.3809        | 466.1941        | 8  | L      | 3  | 402.2459        | 201.6266        |
|         | 1045.4238       | 523.2155        | 9  | N      | 2  | 289.1619        | 145.0846        |
|         |                 |                 | 10 | R      | 1  | 175.1190        | 88.0631         |

Annotated spectra from Saleem et. al. 2009

K.TAES<sub>167</sub>T<sub>181</sub>PLS<sub>167</sub>ALYVSK<sub>136</sub>Y/3

0.6755

1e+04

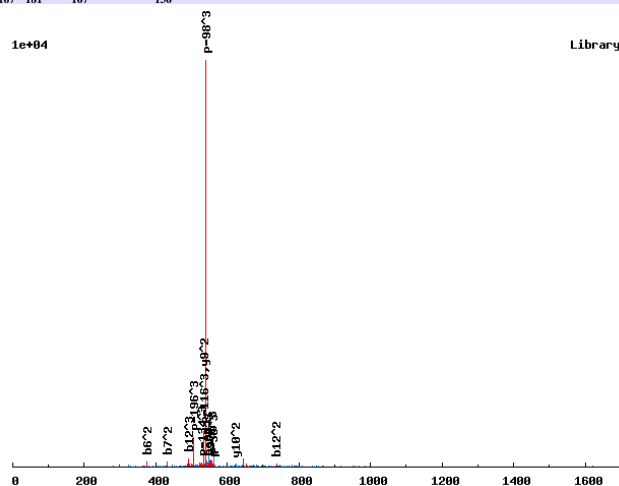

| Library | b <sup>1+</sup> | b <sup>2+</sup> | b <sup>3+</sup> | #  | AA     | #  | y <sup>1+</sup> | y <sup>2+</sup> | y <sup>3+</sup> |
|---------|-----------------|-----------------|-----------------|----|--------|----|-----------------|-----------------|-----------------|
|         | 102.0550        | 51.5311         | 34.6898         | 1  | T      | 14 |                 |                 |                 |
|         | 173.0921        | 87.0497         | 58.3689         | 2  | A      | 13 | 1613.6392       | 807.3232        | 538.5513        |
|         | 302.1347        | 151.5710        | 101.3831        | 3  | E      | 12 | 1542.6021       | 771.8047        | 514.8722        |
|         | 469.1330        | 235.0702        | 157.0492        | 4  | S[167] | 11 | 1413.5595       | 707.2834        | 471.8580        |
|         | 650.1470        | 325.5772        | 217.3872        | 5  | T[181] | 10 | 1246.5611       | 623.7842        | 416.1919        |
|         | 747.1998        | 374.1035        | 249.7381        | 6  | P      | 9  | 1065.5471       | 533.2772        | 355.8539        |
|         | 860.2839        | 430.6456        | 287.4328        | 7  | L      | 8  | 968.4944        | 484.7508        | 323.5030        |
|         | 1027.2822       | 514.1447        | 343.0989        | 8  | S[167] | 7  | 855.4103        | 428.2088        | 285.8083        |
|         | 1098.3193       | 549.6633        | 366.7780        | 9  | A      | 6  | 688.4119        | 344.7096        | 230.1422        |
|         | 1211.4034       | 606.2053        | 404.4726        | 10 | L      | 5  | 617.3748        | 309.1911        | 206.4631        |
|         | 1374.4667       | 687.7370        | 458.8271        | 11 | Y      | 4  | 504.2908        | 252.6490        | 168.7684        |
|         | 1473.5351       | 737.2712        | 491.8499        | 12 | V      | 3  | 341.2274        | 171.1174        | 114.4140        |
|         | 1560.5672       | 780.7872        | 520.8606        | 13 | S      | 2  | 242.1590        | 121.5832        | 81.3912         |
|         |                 |                 |                 | 14 | K[136] | 1  | 155.1270        | 78.0671         | 52.3805         |

# Annotated spectra from Saleem et. al. 2009

R.TAEVSHDIENS<sub>167</sub>-SQNT<sub>181</sub>TGNVLPVSSPQTR<sub>166</sub>.V/3

0.9993

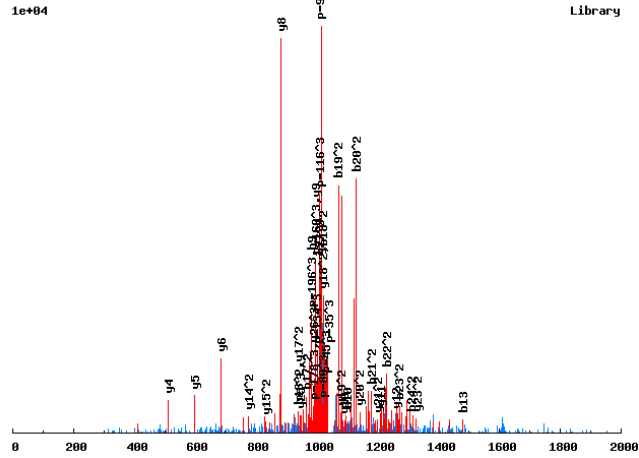

| Library | b <sup>1+</sup> | b <sup>2+</sup> | b <sup>3+</sup> | #  | AA     | #  | y <sup>1+</sup> | y <sup>2+</sup> | y <sup>3+</sup> |
|---------|-----------------|-----------------|-----------------|----|--------|----|-----------------|-----------------|-----------------|
|         | 102.0550        | 51.5311         | 34.6898         | 1  | T      | 28 |                 |                 |                 |
|         | 173.0921        | 87.0497         | 58.3689         | 2  | A      | 27 | 3037.3175       | 1519.1624       | 1013.1107       |
|         | 302.1347        | 151.5710        | 101.3831        | 3  | E      | 26 | 2966.2804       | 1483.6438       | 989.4316        |
|         | 401.2031        | 201.1052        | 134.4059        | 4  | V      | 25 | 2837.2378       | 1419.1225       | 946.4175        |
|         | 488.2351        | 244.6212        | 163.4166        | 5  | S      | 24 | 2738.1694       | 1369.5883       | 913.3946        |
|         | 625.2940        | 313.1506        | 209.1029        | 6  | H      | 23 | 2651.1374       | 1326.0723       | 884.3840        |
|         | 740.3210        | 370.6641        | 247.4452        | 7  | D      | 22 | 2514.0784       | 1257.5429       | 838.6977        |
|         | 853.4050        | 427.2061        | 285.1399        | 8  | I      | 21 | 2399.0515       | 1200.0294       | 800.3554        |
|         | 982.4476        | 491.7274        | 328.1541        | 9  | E      | 20 | 2285.9674       | 1143.4874       | 762.6607        |
|         | 1096.4905       | 548.7489        | 366.1684        | 10 | N      | 19 | 2156.9249       | 1078.9661       | 719.6465        |
|         | 1263.4889       | 632.2481        | 421.8345        | 11 | S[167] | 18 | 2042.8819       | 1021.9446       | 681.6322        |
|         | 1350.5209       | 675.7641        | 450.8452        | 12 | S      | 17 | 1875.8836       | 938.4454        | 625.9660        |
|         | 1478.5795       | 739.7934        | 493.5314        | 13 | Q      | 16 | 1788.8515       | 894.9294        | 596.9554        |
|         | 1592.6224       | 796.8149        | 531.5457        | 14 | N      | 15 | 1660.7929       | 830.9001        | 554.2692        |
|         | 1773.6364       | 887.3219        | 591.8837        | 15 | T[181] | 14 | 1546.7500       | 773.8786        | 516.2549        |
|         | 1874.6841       | 937.8457        | 625.5662        | 16 | T      | 13 | 1365.7360       | 683.3716        | 455.9169        |
|         | 1931.7056       | 966.3564        | 644.5734        | 17 | G      | 12 | 1264.6883       | 632.8478        | 422.2343        |
|         | 2045.7485       | 1023.3779       | 682.5877        | 18 | N      | 11 | 1207.6669       | 604.3371        | 403.2271        |
|         | 2144.8169       | 1072.9121       | 715.6105        | 19 | V      | 10 | 1093.6239       | 547.3156        | 365.2128        |
|         | 2257.9010       | 1129.4541       | 753.3052        | 20 | L      | 9  | 994.5555        | 497.7814        | 332.1900        |
|         | 2354.9537       | 1177.9805       | 785.6561        | 21 | P      | 8  | 881.4715        | 441.2394        | 294.4953        |
|         | 2454.0222       | 1227.5147       | 818.6789        | 22 | V      | 7  | 784.4187        | 392.7130        | 262.1444        |
|         | 2541.0542       | 1271.0307       | 847.6896        | 23 | S      | 6  | 685.3503        | 343.1788        | 229.1216        |
|         | 2628.0862       | 1314.5467       | 876.7003        | 24 | S      | 5  | 598.3183        | 299.6628        | 200.1109        |
|         | 2725.1390       | 1363.0731       | 909.0512        | 25 | P      | 4  | 511.2862        | 256.1468        | 171.1003        |
|         | 2853.1976       | 1427.1024       | 951.7374        | 26 | Q      | 3  | 414.2335        | 207.6204        | 138.7493        |
|         | 2954.2452       | 1477.6263       | 985.4199        | 27 | T      | 2  | 286.1749        | 143.5911        | 96.0632         |
|         |                 |                 |                 | 28 | R[166] | 1  | 185.1272        | 93.0672         | 62.3806         |



# Annotated spectra from Saleem et. al. 2009

K.T.<sub>181</sub>ALSVGT<sub>181</sub>APPFSTNSK.K/2

0.8144

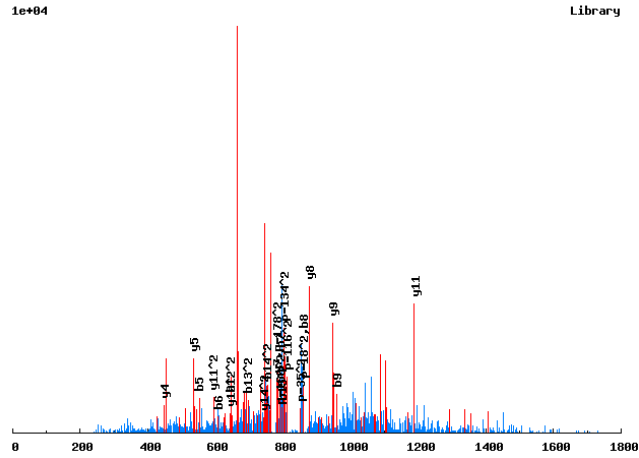

| Library | b <sup>1+</sup> | b <sup>2+</sup> | #  | AA     | #  | y <sup>1+</sup> | y <sup>2+</sup> |
|---------|-----------------|-----------------|----|--------|----|-----------------|-----------------|
|         | 182.0213        | 91.5143         | 1  | T[181] | 16 |                 |                 |
|         | 253.0584        | 127.0328        | 2  | A      | 15 | 1556.7356       | 778.8714        |
|         | 366.1425        | 183.5749        | 3  | L      | 14 | 1485.6985       | 743.3529        |
|         | 453.1745        | 227.0909        | 4  | S      | 13 | 1372.6144       | 686.8109        |
|         | 552.2429        | 276.6251        | 5  | V      | 12 | 1285.5824       | 643.2948        |
|         | 609.2644        | 305.1358        | 6  | G      | 11 | 1186.5140       | 593.7606        |
|         | 790.2784        | 395.6428        | 7  | T[181] | 10 | 1129.4925       | 565.2499        |
|         | 861.3155        | 431.1614        | 8  | A      | 9  | 948.4785        | 474.7429        |
|         | 958.3682        | 479.6878        | 9  | P      | 8  | 877.4414        | 439.2243        |
|         | 1055.4210       | 528.2141        | 10 | P      | 7  | 780.3886        | 390.6980        |
|         | 1202.4894       | 601.7483        | 11 | F      | 6  | 683.3359        | 342.1716        |
|         | 1289.5214       | 645.2644        | 12 | S      | 5  | 536.2675        | 268.6374        |
|         | 1390.5691       | 695.7882        | 13 | T      | 4  | 449.2354        | 225.1214        |
|         | 1504.6121       | 752.8097        | 14 | N      | 3  | 348.1878        | 174.5975        |
|         | 1591.6441       | 796.3257        | 15 | S      | 2  | 234.1448        | 117.5761        |
|         |                 |                 | 16 | K      | 1  | 147.1128        | 74.0600         |

Annotated spectra from Saleem et. al. 2009

K.TANANQTHSNIDYDT<sub>181</sub>DDGNEK.N/3

0.9261

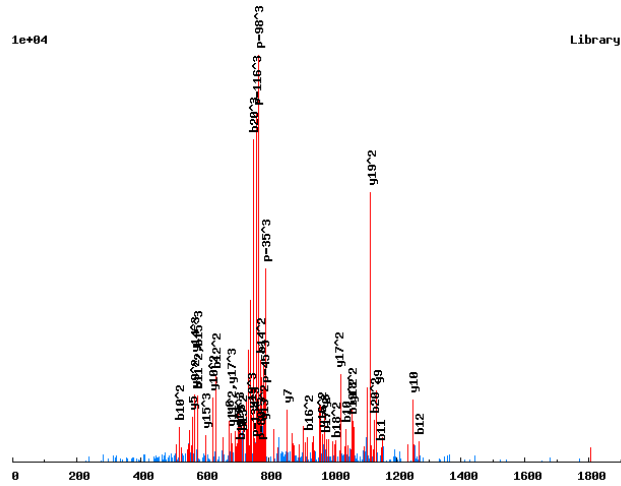

| Library | b <sup>1+</sup> | b <sup>2+</sup> | b <sup>3+</sup> | #  | AA      | #  | y <sup>1+</sup> | y <sup>2+</sup> | y <sup>3+</sup> |
|---------|-----------------|-----------------|-----------------|----|---------|----|-----------------|-----------------|-----------------|
|         | 102.0550        | 51.5311         | 34.6898         | 1  | T       | 21 |                 |                 |                 |
|         | 173.0921        | 87.0497         | 58.3689         | 2  | A       | 20 | 2301.8892       | 1151.4482       | 767.9679        |
|         | 287.1350        | 144.0711        | 96.3832         | 3  | N       | 19 | 2230.8520       | 1115.9297       | 744.2889        |
|         | 358.1721        | 179.5897        | 120.0622        | 4  | A       | 18 | 2116.8091       | 1058.9082       | 706.2746        |
|         | 472.2150        | 236.6112        | 158.0765        | 5  | N       | 17 | 2045.7720       | 1023.3896       | 682.5955        |
|         | 600.2736        | 300.6405        | 200.7627        | 6  | Q       | 16 | 1931.7291       | 966.3682        | 644.5812        |
|         | 701.3213        | 351.1643        | 234.4453        | 7  | T       | 15 | 1803.6705       | 902.3389        | 601.8950        |
|         | 838.3802        | 419.6937        | 280.1316        | 8  | H       | 14 | 1702.6228       | 851.8150        | 568.2125        |
|         | 925.4122        | 463.2098        | 309.1423        | 9  | S       | 13 | 1565.5639       | 783.2856        | 522.5262        |
|         | 1039.4552       | 520.2312        | 347.1566        | 10 | N       | 12 | 1478.5319       | 739.7696        | 493.5155        |
|         | 1152.5392       | 576.7733        | 384.8513        | 11 | I       | 11 | 1364.4889       | 682.7481        | 455.5012        |
|         | 1267.5662       | 634.2867        | 423.1936        | 12 | D       | 10 | 1251.4049       | 626.2061        | 417.8065        |
|         | 1430.6295       | 715.8184        | 477.5480        | 13 | Y       | 9  | 1136.3779       | 568.6926        | 379.4642        |
|         | 1545.6564       | 773.3319        | 515.8903        | 14 | D       | 8  | 973.3146        | 487.1609        | 325.1097        |
|         | 1726.6705       | 863.8389        | 576.2283        | 15 | T [181] | 7  | 858.2877        | 429.6475        | 286.7674        |
|         | 1841.6974       | 921.3523        | 614.5707        | 16 | D       | 6  | 677.2737        | 339.1405        | 226.4294        |
|         | 1956.7243       | 978.8658        | 652.9130        | 17 | D       | 5  | 562.2467        | 281.6270        | 188.0871        |
|         | 2013.7458       | 1007.3765       | 671.9201        | 18 | G       | 4  | 447.2198        | 224.1135        | 149.7448        |
|         | 2127.7887       | 1064.3980       | 709.9344        | 19 | N       | 3  | 390.1983        | 195.6028        | 130.7376        |
|         | 2256.8313       | 1128.9193       | 752.9486        | 20 | E       | 2  | 276.1554        | 138.5813        | 92.7233         |
|         |                 |                 |                 | 21 | K       | 1  | 147.1128        | 74.0600         | 49.7091         |

# Annotated spectra from Saleem et. al. 2009

K.T.<sub>181</sub>ANGLIS<sub>167</sub>ANTGVSMPTVQR.T/3

0.9344

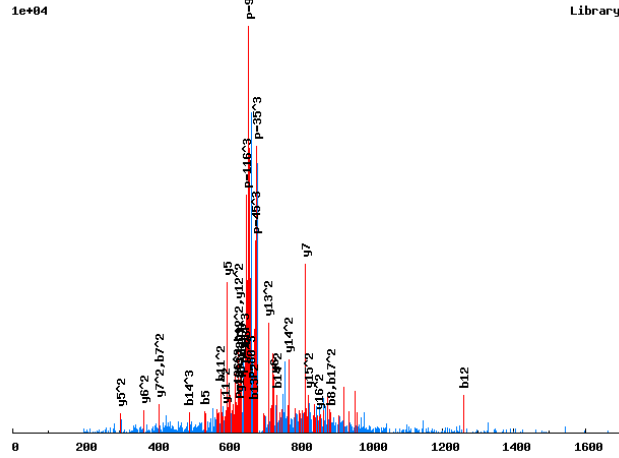

| Library | b <sup>1+</sup> | b <sup>2+</sup> | b <sup>3+</sup> | #  | AA     | #  | y <sup>1+</sup> | y <sup>2+</sup> | y <sup>3+</sup> |
|---------|-----------------|-----------------|-----------------|----|--------|----|-----------------|-----------------|-----------------|
|         | 182.0213        | 91.5143         | 61.3453         | 1  | T[181] | 19 |                 |                 |                 |
|         | 253.0584        | 127.0328        | 85.0243         | 2  | A      | 18 | 1895.9045       | 948.4559        | 632.6397        |
|         | 367.1013        | 184.0543        | 123.0386        | 3  | N      | 17 | 1824.8674       | 912.9373        | 608.9606        |
|         | 424.1228        | 212.5650        | 142.0458        | 4  | G      | 16 | 1710.8244       | 855.9159        | 570.9463        |
|         | 537.2069        | 269.1071        | 179.7405        | 5  | L      | 15 | 1653.8030       | 827.4051        | 551.9392        |
|         | 650.2909        | 325.6491        | 217.4352        | 6  | I      | 14 | 1540.7189       | 770.8631        | 514.2445        |
|         | 817.2893        | 409.1483        | 273.1013        | 7  | S[167] | 13 | 1427.6349       | 714.3211        | 476.5498        |
|         | 888.3264        | 444.6668        | 296.7803        | 8  | A      | 12 | 1260.6365       | 630.8219        | 420.8837        |
|         | 1002.3693       | 501.6883        | 334.7946        | 9  | N      | 11 | 1189.5994       | 595.3033        | 397.2046        |
|         | 1103.4170       | 552.2121        | 368.4772        | 10 | T      | 10 | 1075.5565       | 538.2819        | 359.1903        |
|         | 1160.4385       | 580.7229        | 387.4843        | 11 | G      | 9  | 974.5088        | 487.7580        | 325.5078        |
|         | 1259.5069       | 630.2571        | 420.5071        | 12 | V      | 8  | 917.4873        | 459.2473        | 306.5006        |
|         | 1346.5389       | 673.7731        | 449.5178        | 13 | S      | 7  | 818.4189        | 409.7131        | 273.4778        |
|         | 1477.5794       | 739.2933        | 493.1980        | 14 | M      | 6  | 731.3869        | 366.1971        | 244.4671        |
|         | 1574.6321       | 787.8197        | 525.5489        | 15 | P      | 5  | 600.3464        | 300.6768        | 200.7870        |
|         | 1675.6798       | 838.3436        | 559.2315        | 16 | T      | 4  | 503.2936        | 252.1504        | 168.4361        |
|         | 1774.7482       | 887.8778        | 592.2543        | 17 | V      | 3  | 402.2459        | 201.6266        | 134.7535        |
|         | 1902.8068       | 951.9070        | 634.9405        | 18 | Q      | 2  | 303.1775        | 152.0924        | 101.7307        |
|         |                 |                 |                 | 19 | R      | 1  | 175.1190        | 88.0631         | 59.0445         |

# Annotated spectra from Saleem et. al. 2009

R.TAPDVSHS<sub>167</sub>-S<sub>167</sub>SPTSGILIEENSR.R/3

0.9999

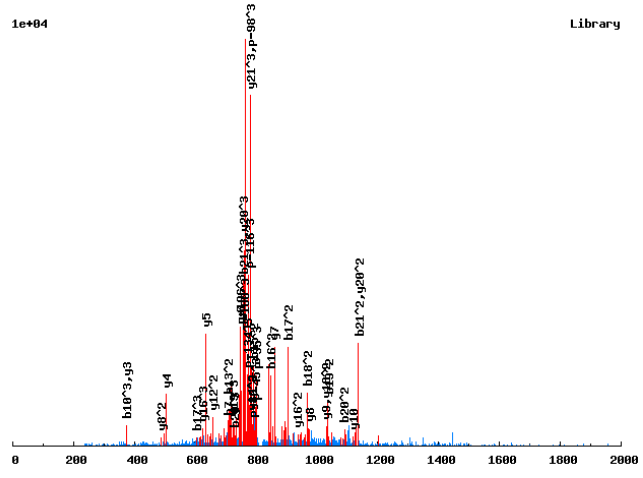

| Library | b <sup>1+</sup> | b <sup>2+</sup> | b <sup>3+</sup> | #  | AA     | #  | y <sup>1+</sup> | y <sup>2+</sup> | y <sup>3+</sup> |
|---------|-----------------|-----------------|-----------------|----|--------|----|-----------------|-----------------|-----------------|
|         | 102.0550        | 51.5311         | 34.6898         | 1  | T      | 22 |                 |                 |                 |
|         | 173.0921        | 87.0497         | 58.3689         | 2  | A      | 21 | 2342.9901       | 1171.9987       | 781.6682        |
|         | 270.1448        | 135.5761        | 90.7198         | 3  | P      | 20 | 2271.9530       | 1136.4801       | 757.9892        |
|         | 385.1718        | 193.0895        | 129.0621        | 4  | D      | 19 | 2174.9002       | 1087.9538       | 725.6383        |
|         | 484.2402        | 242.6237        | 162.0849        | 5  | V      | 18 | 2059.8733       | 1030.4403       | 687.2960        |
|         | 571.2722        | 286.1397        | 191.0956        | 6  | S      | 17 | 1960.8049       | 980.9061        | 654.2732        |
|         | 708.3311        | 354.6692        | 236.7819        | 7  | H      | 16 | 1873.7729       | 937.3901        | 625.2625        |
|         | 875.3295        | 438.1684        | 292.4480        | 8  | S[167] | 15 | 1736.7140       | 868.8606        | 579.5762        |
|         | 1042.3278       | 521.6676        | 348.1141        | 9  | S[167] | 14 | 1569.7156       | 785.3614        | 523.9101        |
|         | 1129.3599       | 565.1836        | 377.1248        | 10 | S      | 13 | 1402.7172       | 701.8623        | 468.2439        |
|         | 1226.4126       | 613.7100        | 409.4757        | 11 | P      | 12 | 1315.6852       | 658.3462        | 439.2333        |
|         | 1327.4603       | 664.2338        | 443.1583        | 12 | T      | 11 | 1218.6324       | 609.8199        | 406.8823        |
|         | 1414.4923       | 707.7498        | 472.1690        | 13 | S      | 10 | 1117.5848       | 559.2960        | 373.1998        |
|         | 1471.5138       | 736.2605        | 491.1761        | 14 | G      | 9  | 1030.5527       | 515.7800        | 344.1891        |
|         | 1584.5979       | 792.8026        | 528.8708        | 15 | I      | 8  | 973.5313        | 487.2693        | 325.1819        |
|         | 1697.6819       | 849.3446        | 566.5655        | 16 | L      | 7  | 860.4472        | 430.7272        | 287.4873        |
|         | 1810.7660       | 905.8866        | 604.2602        | 17 | I      | 6  | 747.3632        | 374.1852        | 249.7926        |
|         | 1939.8086       | 970.4079        | 647.2744        | 18 | E      | 5  | 634.2791        | 317.6432        | 212.0979        |
|         | 2068.8512       | 1034.9292       | 690.2886        | 19 | E      | 4  | 505.2365        | 253.1219        | 169.0837        |
|         | 2182.8941       | 1091.9507       | 728.3029        | 20 | N      | 3  | 376.1939        | 188.6006        | 126.0695        |
|         | 2269.9261       | 1135.4667       | 757.3136        | 21 | S      | 2  | 262.1510        | 131.5791        | 88.0552         |
|         |                 |                 |                 | 22 | R      | 1  | 175.1190        | 88.0631         | 59.0445         |

Annotated spectra from Saleem et. al. 2009

K.T<sub>181</sub>ATGENQNDDFK<sub>136</sub>DANEDLHS<sub>167</sub>LSSR<sub>166</sub>.G/3

0.6348

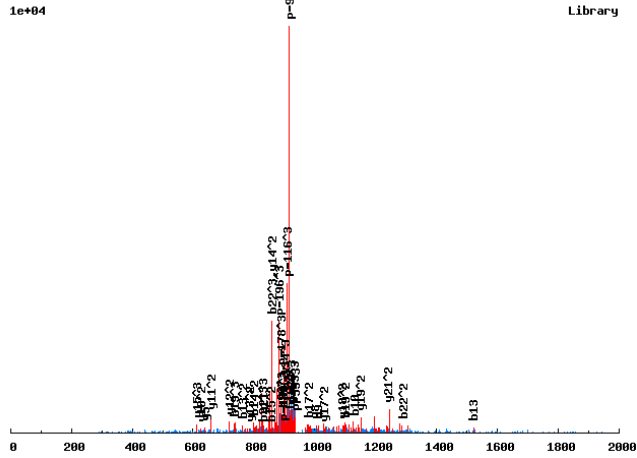

| Library | b <sup>1+</sup> | b <sup>2+</sup> | b <sup>3+</sup> | #  | AA      | #  | y <sup>1+</sup> | y <sup>2+</sup> | y <sup>3+</sup> |
|---------|-----------------|-----------------|-----------------|----|---------|----|-----------------|-----------------|-----------------|
|         | 182.0213        | 91.5143         | 61.3453         | 1  | T [181] | 24 |                 |                 |                 |
|         | 253.0584        | 127.0328        | 85.0243         | 2  | A       | 23 | 2661.1179       | 1331.0626       | 887.7108        |
|         | 354.1061        | 177.5567        | 118.7069        | 3  | T       | 22 | 2590.0808       | 1295.5440       | 864.0318        |
|         | 411.1275        | 206.0674        | 137.7140        | 4  | G       | 21 | 2489.0331       | 1245.0202       | 830.3492        |
|         | 540.1701        | 270.5887        | 180.7282        | 5  | E       | 20 | 2432.0117       | 1216.5095       | 811.3421        |
|         | 654.2131        | 327.6102        | 218.7425        | 6  | N       | 19 | 2302.9691       | 1151.9882       | 768.3279        |
|         | 782.2716        | 391.6395        | 261.4287        | 7  | Q       | 18 | 2188.9261       | 1094.9667       | 730.3136        |
|         | 896.3146        | 448.6609        | 299.4430        | 8  | N       | 17 | 2060.8676       | 1030.9374       | 687.6274        |
|         | 1011.3415       | 506.1744        | 337.7854        | 9  | D       | 16 | 1946.8246       | 973.9160        | 649.6131        |
|         | 1126.3685       | 563.6879        | 376.1277        | 10 | D       | 15 | 1831.7977       | 916.4025        | 611.2707        |
|         | 1273.4369       | 637.2221        | 425.1505        | 11 | F       | 14 | 1716.7707       | 858.8890        | 572.9284        |
|         | 1409.5460       | 705.2766        | 470.5202        | 12 | K [136] | 13 | 1569.7023       | 785.3548        | 523.9056        |
|         | 1524.5730       | 762.7901        | 508.8625        | 13 | D       | 12 | 1433.5932       | 717.3002        | 478.5359        |
|         | 1595.6101       | 798.3087        | 532.5415        | 14 | A       | 11 | 1318.5662       | 659.7868        | 440.1936        |
|         | 1709.6530       | 855.3301        | 570.5559        | 15 | N       | 10 | 1247.5291       | 624.2682        | 416.5146        |
|         | 1838.6956       | 919.8514        | 613.5700        | 16 | E       | 9  | 1133.4862       | 567.2467        | 378.5003        |
|         | 1953.7225       | 977.3649        | 651.9124        | 17 | D       | 8  | 1004.4436       | 502.7254        | 335.4861        |
|         | 2066.8066       | 1033.9069       | 689.6070        | 18 | L       | 7  | 889.4167        | 445.2120        | 297.1437        |
|         | 2203.8655       | 1102.4364       | 735.2934        | 19 | H       | 6  | 776.3326        | 388.6699        | 259.4491        |
|         | 2370.8639       | 1185.9356       | 790.9595        | 20 | S [167] | 5  | 639.2737        | 320.1405        | 213.7628        |
|         | 2483.9479       | 1242.4776       | 828.6542        | 21 | L       | 4  | 472.2753        | 236.6413        | 158.0966        |
|         | 2570.9800       | 1285.9936       | 857.6648        | 22 | S       | 3  | 359.1913        | 180.0993        | 120.4019        |
|         | 2658.0120       | 1329.5096       | 886.6755        | 23 | S       | 2  | 272.1592        | 136.5833        | 91.3913         |
|         |                 |                 |                 | 24 | R [166] | 1  | 185.1272        | 93.0672         | 62.3806         |

# Annotated spectra from Saleem et. al. 2009

R.TAT<sub>181</sub>PQS<sub>167</sub>-LQGSNK.S/2

0.9999

1e+04

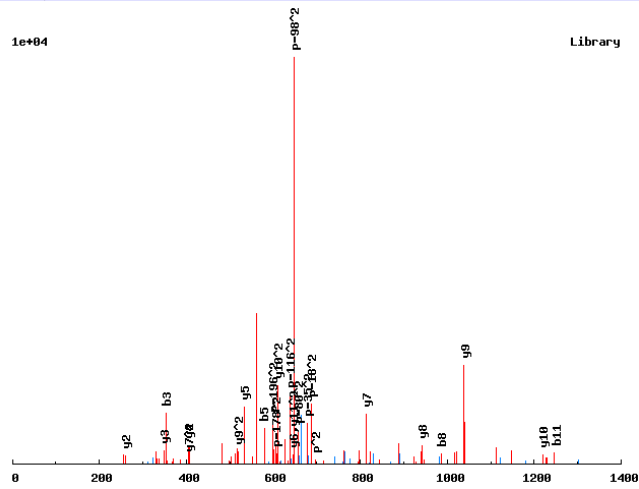

| Library | b <sup>1+</sup> | b <sup>2+</sup> | #  | AA     | #  | y <sup>1+</sup> | y <sup>2+</sup> |
|---------|-----------------|-----------------|----|--------|----|-----------------|-----------------|
|         | 102.0550        | 51.5311         | 1  | T      | 12 |                 |                 |
|         | 173.0921        | 87.0497         | 2  | A      | 11 | 1290.5127       | 645.7600        |
|         | 354.1061        | 177.5567        | 3  | T[181] | 10 | 1219.4756       | 610.2414        |
|         | 451.1588        | 226.0831        | 4  | P      | 9  | 1038.4616       | 519.7344        |
|         | 579.2174        | 290.1124        | 5  | Q      | 8  | 941.4088        | 471.2080        |
|         | 746.2158        | 373.6115        | 6  | S[167] | 7  | 813.3502        | 407.1788        |
|         | 859.2998        | 430.1536        | 7  | L      | 6  | 646.3519        | 323.6796        |
|         | 987.3584        | 494.1829        | 8  | Q      | 5  | 533.2678        | 267.1375        |
|         | 1044.3799       | 522.6936        | 9  | G      | 4  | 405.2092        | 203.1082        |
|         | 1131.4119       | 566.2096        | 10 | S      | 3  | 348.1878        | 174.5975        |
|         | 1245.4548       | 623.2311        | 11 | N      | 2  | 261.1557        | 131.0815        |
|         |                 |                 | 12 | K      | 1  | 147.1128        | 74.0600         |

# Annotated spectra from Saleem et. al. 2009

K.TATPS<sub>167</sub>S<sub>167</sub>S<sub>167</sub>S<sub>167</sub>S<sub>167</sub>S<sub>167</sub>SR<sub>166</sub>S/3

0.7267

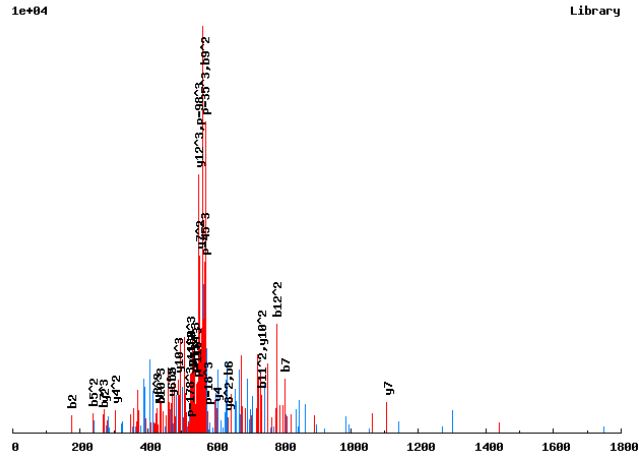

| Library | b <sup>1+</sup> | b <sup>2+</sup> | b <sup>3+</sup> | #  | AA     | #  | y <sup>1+</sup> | y <sup>2+</sup> | y <sup>3+</sup> |
|---------|-----------------|-----------------|-----------------|----|--------|----|-----------------|-----------------|-----------------|
|         | 102.0550        | 51.5311         | 34.6898         | 1  | T      | 13 |                 |                 |                 |
|         | 173.0921        | 87.0497         | 58.3689         | 2  | A      | 12 | 1644.3346       | 822.6710        | 548.7831        |
|         | 274.1397        | 137.5735        | 92.0514         | 3  | T      | 11 | 1573.2975       | 787.1524        | 525.1040        |
|         | 375.1874        | 188.0974        | 125.7340        | 4  | T      | 10 | 1472.2499       | 736.6286        | 491.4215        |
|         | 472.2402        | 236.6237        | 158.0849        | 5  | P      | 9  | 1371.2022       | 686.1047        | 457.7389        |
|         | 639.2386        | 320.1229        | 213.7510        | 6  | S[167] | 8  | 1274.1494       | 637.5783        | 425.3880        |
|         | 806.2369        | 403.6221        | 269.4172        | 7  | S[167] | 7  | 1107.1511       | 554.0792        | 369.7219        |
|         | 973.2353        | 487.1213        | 325.0833        | 8  | S[167] | 6  | 940.1527        | 470.5800        | 314.0558        |
|         | 1140.2336       | 570.6205        | 380.7494        | 9  | S[167] | 5  | 773.1543        | 387.0808        | 258.3896        |
|         | 1307.2320       | 654.1196        | 436.4155        | 10 | S[167] | 4  | 606.1560        | 303.5816        | 202.7235        |
|         | 1474.2304       | 737.6188        | 492.0816        | 11 | S[167] | 3  | 439.1576        | 220.0824        | 147.0574        |
|         | 1561.2624       | 821.1348        | 552.0923        | 12 | S      | 2  | 272.1592        | 136.5833        | 91.3913         |
|         |                 |                 |                 | 13 | R[166] | 1  | 185.1272        | 93.0672         | 62.3806         |

# Annotated spectra from Saleem et. al. 2009

R.TDNS<sub>167</sub>LNS<sub>167</sub>LSTSTEISR.K/2

0.9996

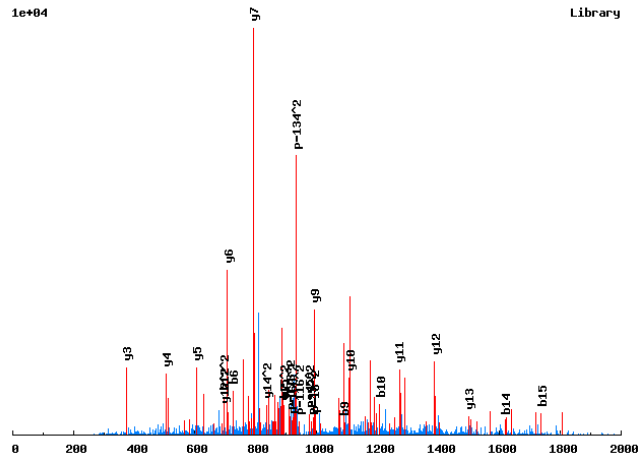

| Library | b <sup>1+</sup> | b <sup>2+</sup> | #  | AA     | #  | y <sup>1+</sup> | y <sup>2+</sup> |
|---------|-----------------|-----------------|----|--------|----|-----------------|-----------------|
|         | 102.0550        | 51.5311         | 1  | T      | 17 |                 |                 |
|         | 217.0819        | 109.0446        | 2  | D      | 16 | 1896.7988       | 948.9030        |
|         | 331.1248        | 166.0661        | 3  | N      | 15 | 1781.7718       | 891.3895        |
|         | 498.1232        | 249.5652        | 4  | S[167] | 14 | 1667.7289       | 834.3681        |
|         | 611.2073        | 306.1073        | 5  | L      | 13 | 1500.7305       | 750.8689        |
|         | 725.2502        | 363.1287        | 6  | N      | 12 | 1387.6465       | 694.3269        |
|         | 892.2485        | 446.6279        | 7  | S[167] | 11 | 1273.6035       | 637.3054        |
|         | 1005.3326       | 503.1699        | 8  | L      | 10 | 1106.6052       | 553.8062        |
|         | 1092.3646       | 546.6860        | 9  | S      | 9  | 993.5211        | 497.2642        |
|         | 1205.4487       | 603.2280        | 10 | L      | 8  | 906.4891        | 453.7482        |
|         | 1292.4807       | 646.7440        | 11 | S      | 7  | 793.4050        | 397.2062        |
|         | 1393.5284       | 697.2678        | 12 | T      | 6  | 706.3730        | 353.6901        |
|         | 1494.5761       | 747.7917        | 13 | T      | 5  | 605.3253        | 303.1663        |
|         | 1623.6187       | 812.3130        | 14 | E      | 4  | 504.2776        | 252.6425        |
|         | 1736.7027       | 868.8550        | 15 | I      | 3  | 375.2350        | 188.1212        |
|         | 1823.7348       | 912.3710        | 16 | S      | 2  | 262.1510        | 131.5791        |
|         |                 |                 | 17 | R      | 1  | 175.1190        | 88.0631         |



## Annotated spectra from Saleem et. al. 2009

K.TEPSEAETT<sub>181</sub>VNT<sub>181</sub>ESLGQAEHEIK<sub>136</sub>-A/3

0.8423

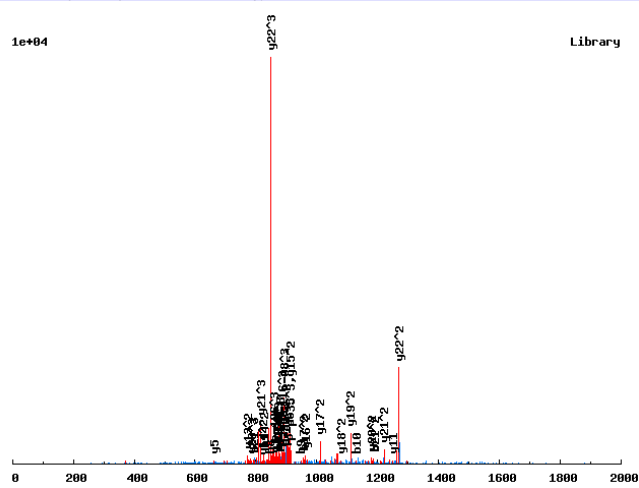

| Library | b <sup>1+</sup> | b <sup>2+</sup> | b <sup>3+</sup> | #  | AA     | #  | y <sup>1+</sup> | y <sup>2+</sup> | y <sup>3+</sup> |
|---------|-----------------|-----------------|-----------------|----|--------|----|-----------------|-----------------|-----------------|
|         | 102.0550        | 51.5311         | 34.6898         | 1  | T      | 24 |                 |                 |                 |
|         | 231.0975        | 116.0524        | 77.7040         | 2  | E      | 23 | 2668.1154       | 1334.5613       | 890.0433        |
|         | 328.1503        | 164.5788        | 110.0550        | 3  | P      | 22 | 2539.0728       | 1270.0400       | 847.0291        |
|         | 415.1823        | 208.0948        | 139.0656        | 4  | S      | 21 | 2442.0200       | 1221.5137       | 814.6782        |
|         | 544.2249        | 272.6161        | 182.0798        | 5  | E      | 20 | 2354.9880       | 1177.9976       | 785.6675        |
|         | 615.2620        | 308.1347        | 205.7589        | 6  | A      | 19 | 2225.9454       | 1113.4763       | 742.6533        |
|         | 744.3046        | 372.6560        | 248.7731        | 7  | E      | 18 | 2154.9083       | 1077.9578       | 718.9743        |
|         | 845.3523        | 423.1798        | 282.4556        | 8  | T      | 17 | 2025.8657       | 1013.4365       | 675.9601        |
|         | 946.4000        | 473.7036        | 316.1382        | 9  | T      | 16 | 1924.8180       | 962.9127        | 642.2775        |
|         | 1127.4140       | 564.2106        | 376.4762        | 10 | T[181] | 15 | 1823.7703       | 912.3888        | 608.5950        |
|         | 1226.4824       | 613.7448        | 409.4990        | 11 | V      | 14 | 1642.7563       | 821.8818        | 548.2570        |
|         | 1340.5253       | 670.7663        | 447.5133        | 12 | N      | 13 | 1543.6879       | 772.3476        | 515.2342        |
|         | 1521.5394       | 761.2733        | 507.8513        | 13 | T[181] | 12 | 1429.6450       | 715.3261        | 477.2198        |
|         | 1650.5819       | 825.7946        | 550.8655        | 14 | E      | 11 | 1248.6310       | 624.8191        | 416.8818        |
|         | 1737.6140       | 869.3106        | 579.8762        | 15 | S      | 10 | 1119.5884       | 560.2978        | 373.8676        |
|         | 1850.6980       | 925.8527        | 617.5709        | 16 | L      | 9  | 1032.5564       | 516.7818        | 344.8570        |
|         | 1907.7195       | 954.3634        | 636.5780        | 17 | G      | 8  | 919.4723        | 460.2398        | 307.1623        |
|         | 2035.7781       | 1018.3927       | 679.2642        | 18 | Q      | 7  | 862.4508        | 431.7291        | 288.1551        |
|         | 2106.8152       | 1053.9112       | 702.9432        | 19 | A      | 6  | 734.3923        | 367.6998        | 245.4689        |
|         | 2235.8578       | 1118.4325       | 745.9574        | 20 | E      | 5  | 663.3551        | 332.1812        | 221.7899        |
|         | 2372.9167       | 1186.9620       | 791.6437        | 21 | H      | 4  | 534.3126        | 267.6599        | 178.7757        |
|         | 2501.9593       | 1251.4833       | 834.6579        | 22 | E      | 3  | 397.2536        | 199.1305        | 133.0894        |
|         | 2615.0433       | 1308.0253       | 872.3526        | 23 | I      | 2  | 268.2111        | 134.6092        | 90.0752         |
|         |                 |                 |                 | 24 | K[136] | 1  | 155.1270        | 78.0671         | 52.3805         |

Annotated spectra from Saleem et. al. 2009

K.TERPQSSTT<sub>181</sub>PIDSK.A/3

0.9911

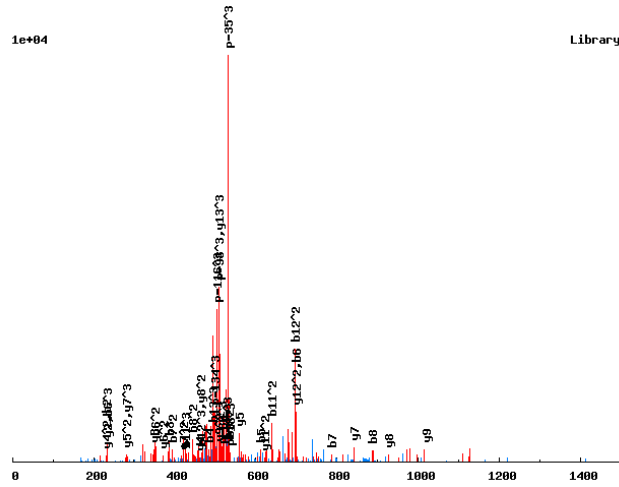

| Library | b <sup>1+</sup> | b <sup>2+</sup> | b <sup>3+</sup> | #  | AA     | #  | y <sup>1+</sup>  | y <sup>2+</sup> | y <sup>3+</sup> |
|---------|-----------------|-----------------|-----------------|----|--------|----|------------------|-----------------|-----------------|
|         | 102.0550        | 51.5311         | 34.6898         | 1  | T      | 14 |                  |                 |                 |
|         | <b>231.0975</b> | 116.0524        | 77.7040         | 2  | E      | 13 | 1525.6894        | 763.3483        | <b>509.2346</b> |
|         | <b>387.1987</b> | 194.1030        | 129.7377        | 3  | R      | 12 | 1396.6468        | <b>698.8270</b> | 466.2205        |
|         | <b>484.2514</b> | 242.6293        | 162.0887        | 4  | P      | 11 | 1240.5457        | <b>620.7765</b> | 414.1867        |
|         | <b>612.3100</b> | 306.6586        | 204.7749        | 5  | Q      | 10 | 1143.4929        | 572.2501        | 381.8358        |
|         | <b>699.3420</b> | <b>350.1747</b> | <b>233.7855</b> | 6  | S      | 9  | <b>1015.4343</b> | <b>508.2208</b> | 339.1496        |
|         | <b>786.3741</b> | <b>393.6907</b> | 262.7962        | 7  | S      | 8  | <b>928.4023</b>  | <b>464.7048</b> | 310.1390        |
|         | <b>887.4217</b> | <b>444.2145</b> | 296.4788        | 8  | T      | 7  | <b>841.3703</b>  | <b>421.1888</b> | <b>281.1283</b> |
|         | 1068.4358       | <b>534.7215</b> | 356.8168        | 9  | T[181] | 6  | 740.3226         | <b>370.6649</b> | 247.4457        |
|         | 1165.4885       | 583.2479        | 389.1677        | 10 | P      | 5  | <b>559.3086</b>  | <b>280.1579</b> | 187.1077        |
|         | 1278.5726       | <b>639.7899</b> | <b>426.8624</b> | 11 | I      | 4  | <b>462.2558</b>  | <b>231.6316</b> | 154.7568        |
|         | 1393.5995       | <b>697.3034</b> | <b>465.2047</b> | 12 | D      | 3  | <b>349.1718</b>  | 175.0895        | 117.0621        |
|         | 1480.6315       | 740.8194        | <b>494.2154</b> | 13 | S      | 2  | <b>234.1448</b>  | 117.5761        | 78.7198         |
|         |                 |                 |                 | 14 | K      | 1  | 147.1128         | 74.0600         | 49.7091         |

# Annotated spectra from Saleem et. al. 2009

R.TEVDT<sub>181</sub>R<sub>166</sub>DSS<sub>167</sub>GDEIDNS<sub>167</sub>DHGSDFK<sub>136</sub>D/3

0.6842

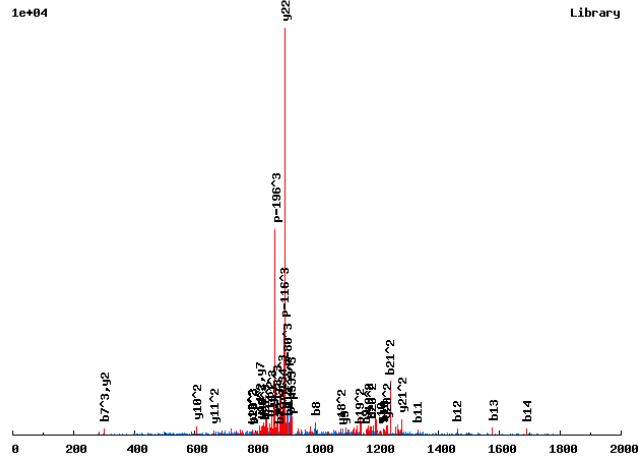

| Library | b <sup>1+</sup> | b <sup>2+</sup> | b <sup>3+</sup> | #  | AA     | #  | y <sup>1+</sup> | y <sup>2+</sup> | y <sup>3+</sup> |
|---------|-----------------|-----------------|-----------------|----|--------|----|-----------------|-----------------|-----------------|
|         | 102.0550        | 51.5311         | 34.6898         | 1  | T      | 23 |                 |                 |                 |
|         | 231.0975        | 116.0524        | 77.7040         | 2  | E      | 22 | 2682.9236       | 1341.9655       | 894.9794        |
|         | 330.1660        | 165.5866        | 110.7268        | 3  | V      | 21 | 2553.8810       | 1277.4442       | 851.9652        |
|         | 445.1929        | 223.1001        | 149.0692        | 4  | D      | 20 | 2454.8126       | 1227.9100       | 818.9424        |
|         | 626.2069        | 313.6071        | 209.4072        | 5  | T[181] | 19 | 2339.7857       | 1170.3965       | 780.6001        |
|         | 792.3163        | 396.6618        | 264.7770        | 6  | R[166] | 18 | 2158.7717       | 1079.8895       | 720.2621        |
|         | 907.3432        | 454.1753        | 303.1193        | 7  | D      | 17 | 1992.6623       | 996.8348        | 664.8923        |
|         | 994.3753        | 497.6913        | 332.1299        | 8  | S      | 16 | 1877.6354       | 939.3213        | 626.5500        |
|         | 1161.3736       | 581.1905        | 387.7961        | 9  | S[167] | 15 | 1790.6033       | 895.8053        | 597.5393        |
|         | 1218.3951       | 609.7012        | 406.8032        | 10 | G      | 14 | 1623.6050       | 812.3061        | 541.8732        |
|         | 1333.4220       | 667.2147        | 445.1455        | 11 | D      | 13 | 1566.5835       | 783.7954        | 522.8660        |
|         | 1462.4646       | 731.7359        | 488.1597        | 12 | E      | 12 | 1451.5566       | 726.2819        | 484.5237        |
|         | 1575.5487       | 788.2780        | 525.8544        | 13 | I      | 11 | 1322.5140       | 661.7606        | 441.5095        |
|         | 1690.5756       | 845.7914        | 564.1967        | 14 | D      | 10 | 1209.4299       | 605.2186        | 403.8148        |
|         | 1804.6185       | 902.8129        | 602.2110        | 15 | N      | 9  | 1094.4030       | 547.7051        | 365.4725        |
|         | 1971.6169       | 986.3121        | 657.8772        | 16 | S[167] | 8  | 980.3601        | 490.6837        | 327.4582        |
|         | 2086.6438       | 1043.8256       | 696.2195        | 17 | D      | 7  | 813.3617        | 407.1845        | 271.7921        |
|         | 2223.7028       | 1112.3550       | 741.9058        | 18 | H      | 6  | 698.3347        | 349.6710        | 233.4498        |
|         | 2280.7242       | 1140.8657       | 760.9129        | 19 | G      | 5  | 561.2758        | 281.1416        | 187.7635        |
|         | 2367.7562       | 1184.3818       | 789.9236        | 20 | S      | 4  | 504.2544        | 252.6308        | 168.7563        |
|         | 2482.7832       | 1241.8952       | 828.2659        | 21 | D      | 3  | 417.2223        | 209.1148        | 139.7456        |
|         | 2629.8516       | 1315.4294       | 877.2887        | 22 | F      | 2  | 302.1954        | 151.6013        | 101.4033        |
|         |                 |                 |                 | 23 | K[136] | 1  | 155.1270        | 78.0671         | 52.3805         |

# Annotated spectra from Saleem et. al. 2009

K.TFIDLESSS<sub>167</sub>PELK<sub>136</sub>-A/2

0.9999

1e+04

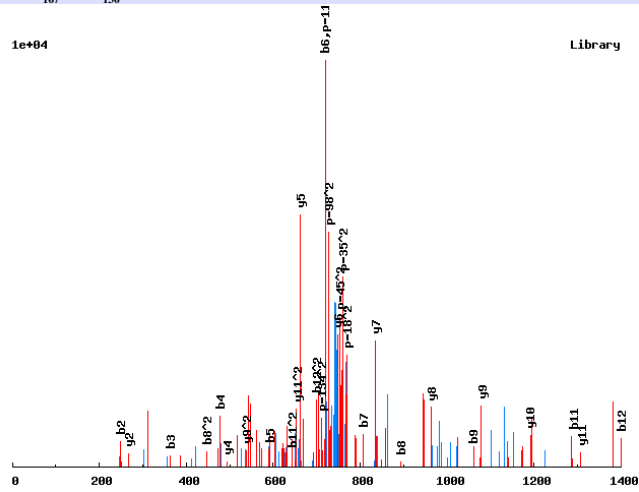

| Library | b <sup>1+</sup> | b <sup>2+</sup> | #  | AA     | #  | y <sup>1+</sup> | y <sup>2+</sup> |
|---------|-----------------|-----------------|----|--------|----|-----------------|-----------------|
|         | 102.0550        | 51.5311         | 1  | T      | 13 |                 |                 |
|         | 249.1234        | 125.0653        | 2  | F      | 12 | 1452.6749       | 726.8411        |
|         | 362.2074        | 181.6074        | 3  | I      | 11 | 1305.6065       | 653.3069        |
|         | 477.2344        | 239.1208        | 4  | D      | 10 | 1192.5224       | 596.7648        |
|         | 590.3184        | 295.6629        | 5  | L      | 9  | 1077.4955       | 539.2514        |
|         | 719.3610        | 360.1842        | 6  | E      | 8  | 964.4114        | 482.7094        |
|         | 806.3931        | 403.7002        | 7  | S      | 7  | 835.3688        | 418.1881        |
|         | 893.4251        | 447.2162        | 8  | S      | 6  | 748.3368        | 374.6720        |
|         | 1060.4234       | 530.7154        | 9  | S[167] | 5  | 661.3048        | 331.1560        |
|         | 1157.4762       | 579.2417        | 10 | P      | 4  | 494.3064        | 247.6568        |
|         | 1286.5188       | 643.7630        | 11 | E      | 3  | 397.2536        | 199.1305        |
|         | 1399.6029       | 700.3051        | 12 | L      | 2  | 268.2111        | 134.6092        |
|         |                 |                 | 13 | K[136] | 1  | 155.1270        | 78.0671         |

# Annotated spectra from Saleem et. al. 2009

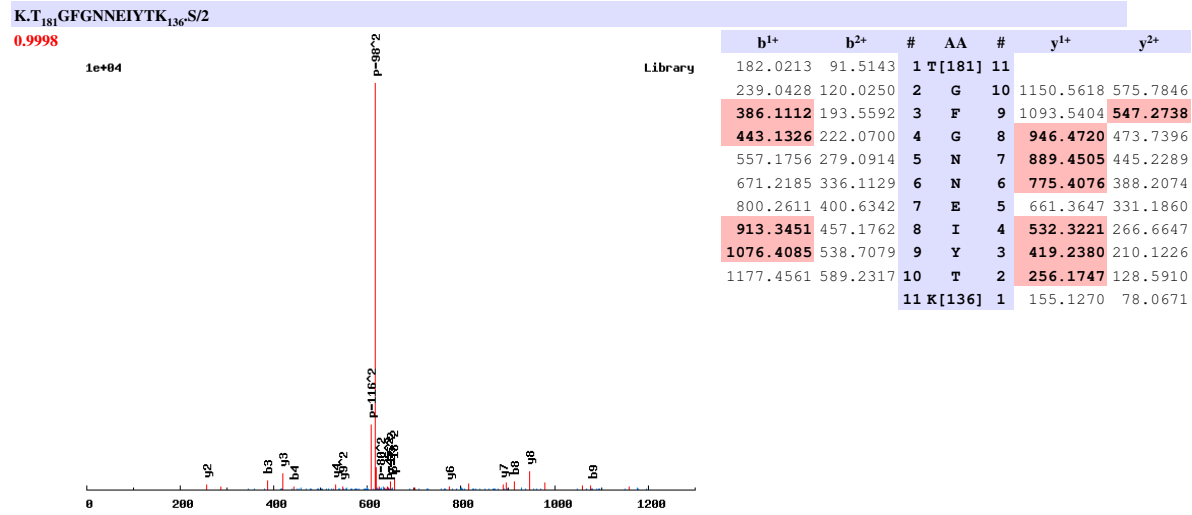

# Annotated spectra from Saleem et. al. 2009

R.TGS<sub>167</sub>LTDLSGR.R/2

0.9663

1e+04

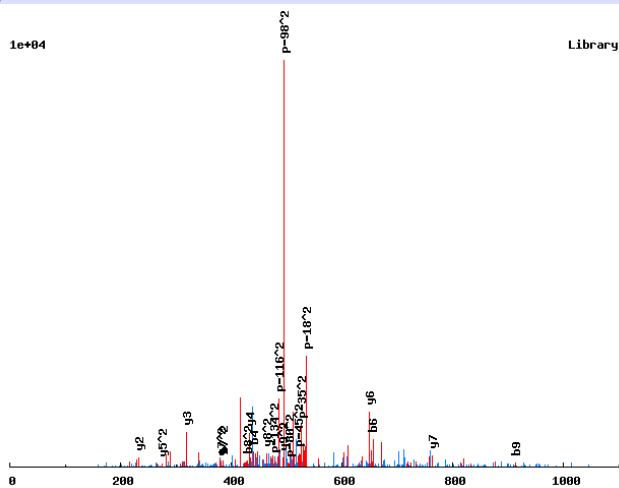

| Library | b <sup>1+</sup> | b <sup>2+</sup> | #  | AA      | #  | y <sup>1+</sup> | y <sup>2+</sup> |
|---------|-----------------|-----------------|----|---------|----|-----------------|-----------------|
|         | 102.0550        | 51.5311         | 1  | T       | 10 |                 |                 |
|         | 159.0764        | 80.0419         | 2  | G       | 9  | 985.4350        | 493.2211        |
|         | 326.0748        | 163.5410        | 3  | S [167] | 8  | 928.4135        | 464.7104        |
|         | 439.1588        | 220.0831        | 4  | L       | 7  | 761.4152        | 381.2112        |
|         | 540.2065        | 270.6069        | 5  | T       | 6  | 648.3311        | 324.6692        |
|         | 655.2335        | 328.1204        | 6  | D       | 5  | 547.2834        | 274.1454        |
|         | 768.3175        | 384.6624        | 7  | L       | 4  | 432.2565        | 216.6319        |
|         | 855.3496        | 428.1784        | 8  | S       | 3  | 319.1724        | 160.0899        |
|         | 912.3710        | 456.6891        | 9  | G       | 2  | 232.1404        | 116.5738        |
|         |                 |                 | 10 | R       | 1  | 175.1190        | 88.0631         |

# Annotated spectra from Saleem et. al. 2009

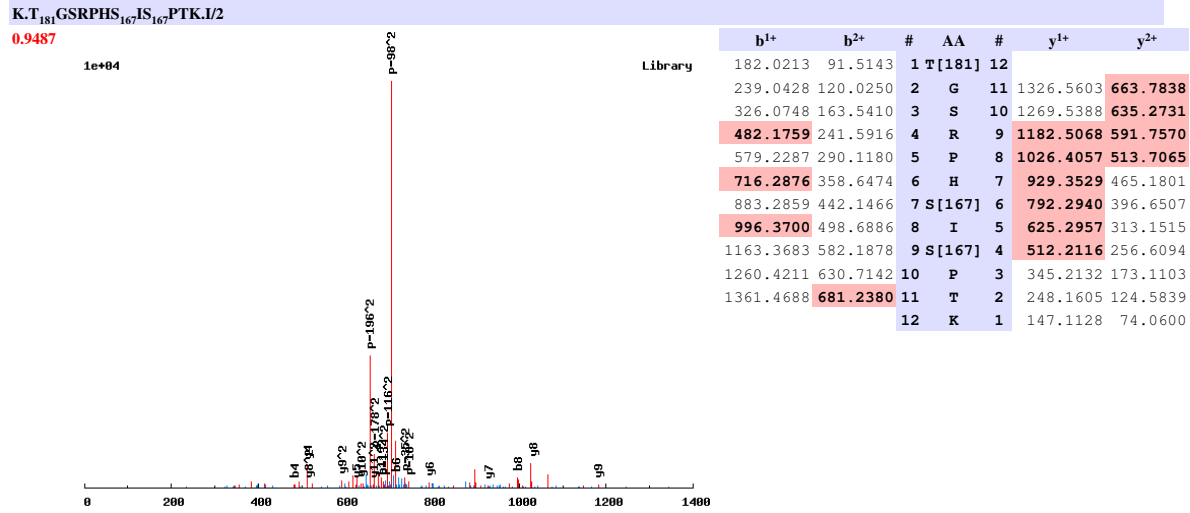

# Annotated spectra from Saleem et. al. 2009

K.T.<sub>181</sub>GS<sub>167</sub>RPHSISPTK.I/3

0.7177

1e+04

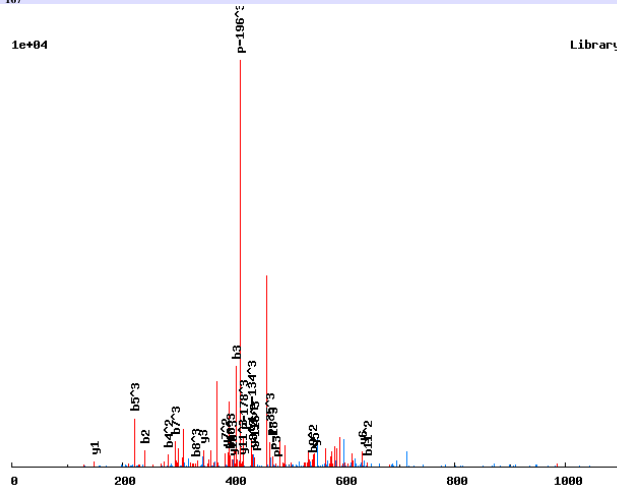

| Library | b <sup>1+</sup> | b <sup>2+</sup> | b <sup>3+</sup> | #  | AA      | #  | y <sup>1+</sup> | y <sup>2+</sup> | y <sup>3+</sup> |
|---------|-----------------|-----------------|-----------------|----|---------|----|-----------------|-----------------|-----------------|
|         | 182.0213        | 91.5143         | 61.3453         | 1  | T [181] | 12 |                 |                 |                 |
|         | 239.0428        | 120.0250        | 80.3524         | 2  | G       | 11 | 1246.5940       | 623.8006        | 416.2028        |
|         | 406.0411        | 203.5242        | 136.0186        | 3  | S [167] | 10 | 1189.5725       | 595.2899        | 397.1957        |
|         | 562.1422        | 281.5748        | 188.0523        | 4  | R       | 9  | 1022.5741       | 511.7907        | 341.5296        |
|         | 659.1950        | 330.1011        | 220.4032        | 5  | P       | 8  | 866.4730        | 433.7402        | 289.4959        |
|         | 796.2539        | 398.6306        | 266.0895        | 6  | H       | 7  | 769.4203        | 385.2138        | 257.1449        |
|         | 883.2859        | 442.1466        | 295.1002        | 7  | S       | 6  | 632.3614        | 316.6843        | 211.4586        |
|         | 996.3700        | 498.6886        | 332.7948        | 8  | I       | 5  | 545.3293        | 273.1683        | 182.4480        |
|         | 1083.4020       | 542.2046        | 361.8055        | 9  | S       | 4  | 432.2453        | 216.6263        | 144.7533        |
|         | 1180.4548       | 590.7310        | 394.1564        | 10 | P       | 3  | 345.2132        | 173.1103        | 115.7426        |
|         | 1281.5025       | 641.2549        | 427.8390        | 11 | T       | 2  | 248.1605        | 124.5839        | 83.3917         |
|         |                 |                 |                 | 12 | K       | 1  | 147.1128        | 74.0600         | 49.7091         |



Annotated spectra from Saleem et. al. 2009

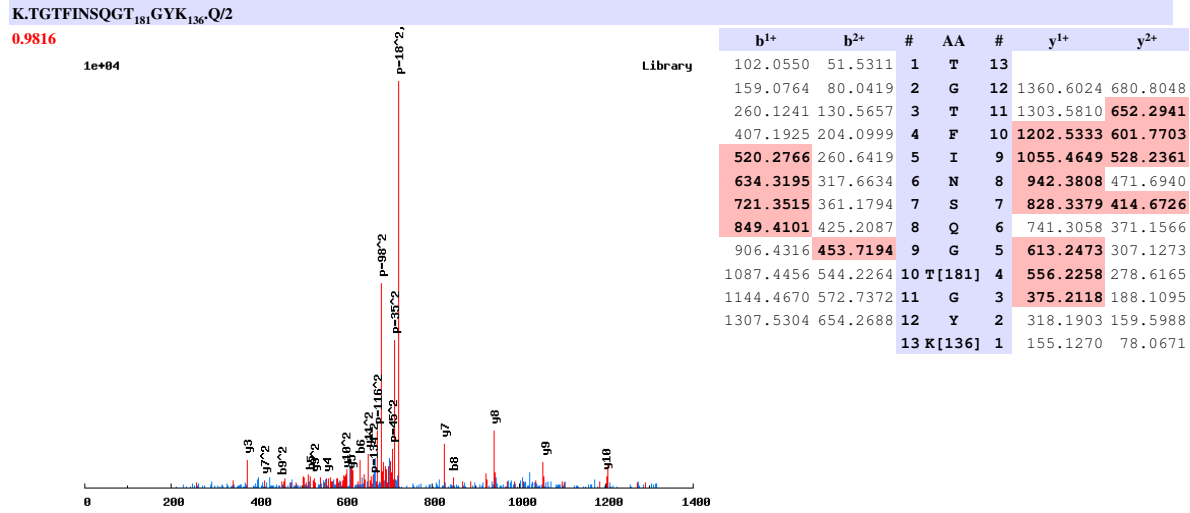

# Annotated spectra from Saleem et. al. 2009

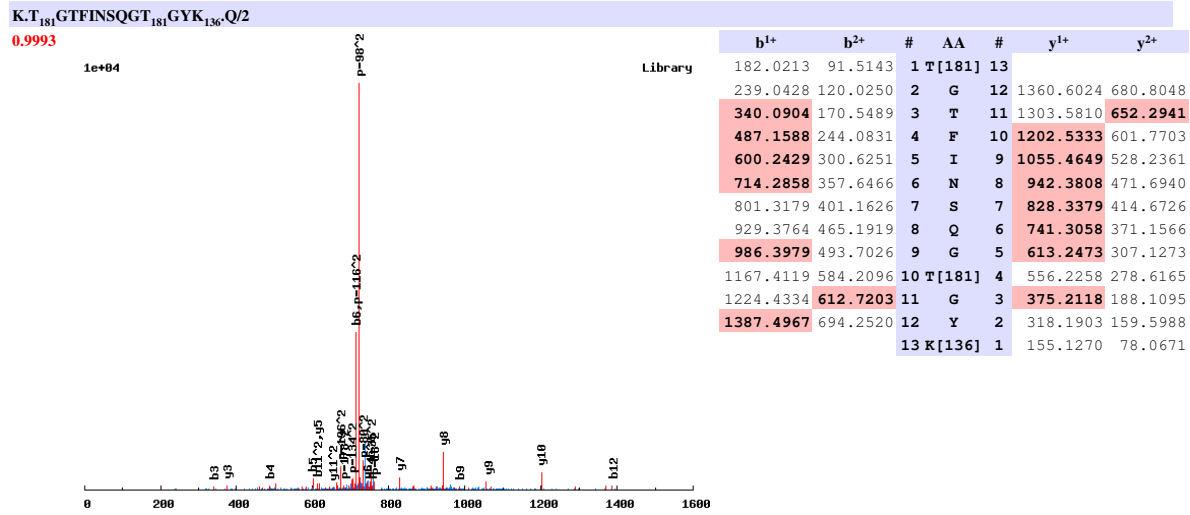

Annotated spectra from Saleem et. al. 2009

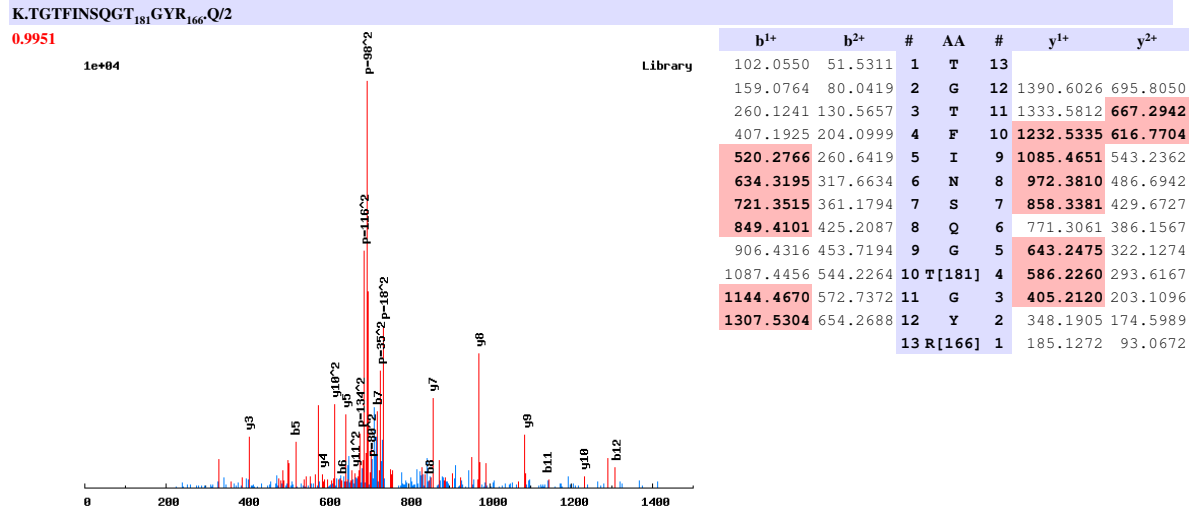

# Annotated spectra from Saleem et. al. 2009

K.T<sub>181</sub>GT<sub>181</sub>FINSQGT<sub>181</sub>GYR<sub>166</sub>Q/2

0.9996

1e+04

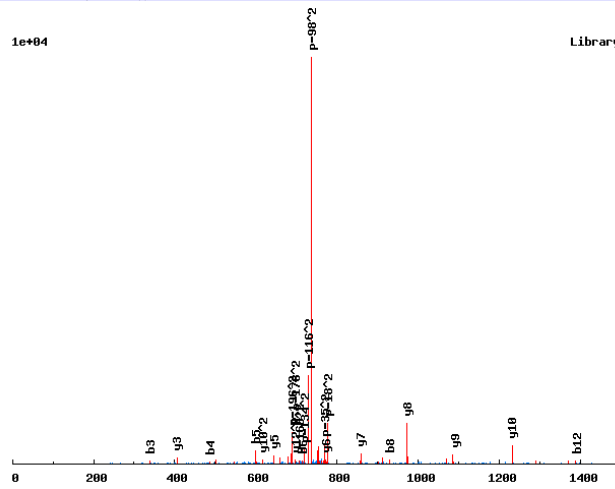

| Library | b <sup>1+</sup> | b <sup>2+</sup> | #  | AA | #     | y <sup>1+</sup> | y <sup>2+</sup> |          |
|---------|-----------------|-----------------|----|----|-------|-----------------|-----------------|----------|
|         | 182.0213        | 91.5143         | 1  | T  | [181] | 13              |                 |          |
|         | 239.0428        | 120.0250        | 2  | G  | 12    | 1390.6026       | 695.8050        |          |
|         | 340.0904        | 170.5489        | 3  | T  | 11    | 1333.5812       | 667.2942        |          |
|         | 487.1588        | 244.0831        | 4  | F  | 10    | 1232.5335       | 616.7704        |          |
|         | 600.2429        | 300.6251        | 5  | I  | 9     | 1085.4651       | 543.2362        |          |
|         | 714.2858        | 357.6466        | 6  | N  | 8     | 972.3810        | 486.6942        |          |
|         | 801.3179        | 401.1626        | 7  | S  | 7     | 858.3381        | 429.6727        |          |
|         | 929.3764        | 465.1919        | 8  | Q  | 6     | 771.3061        | 386.1567        |          |
|         | 986.3979        | 493.7026        | 9  | G  | 5     | 643.2475        | 322.1274        |          |
|         | 1167.4119       | 584.2096        | 10 | T  | [181] | 4               | 586.2260        | 293.6167 |
|         | 1224.4334       | 612.7203        | 11 | G  | 3     | 405.2120        | 203.1096        |          |
|         | 1387.4967       | 694.2520        | 12 | Y  | 2     | 348.1905        | 174.5989        |          |
|         |                 |                 | 13 | R  | [166] | 1               | 185.1272        | 93.0672  |

# Annotated spectra from Saleem et. al. 2009

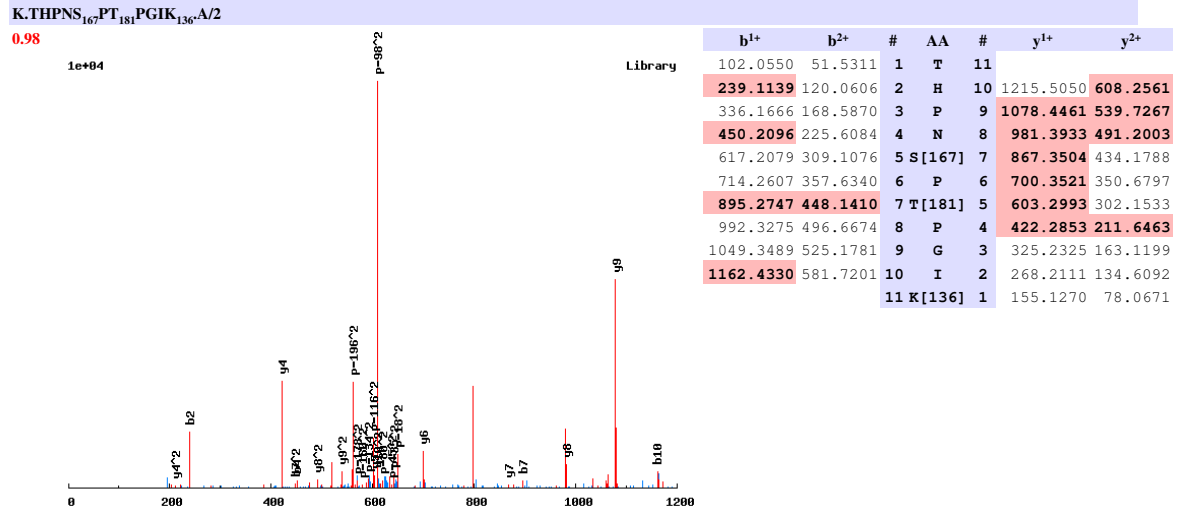

# Annotated spectra from Saleem et. al. 2009

R.THS<sub>167</sub>ADRS<sub>167</sub>PLS<sub>167</sub>VQADEAEVHNADNSR.F/3

0.6614

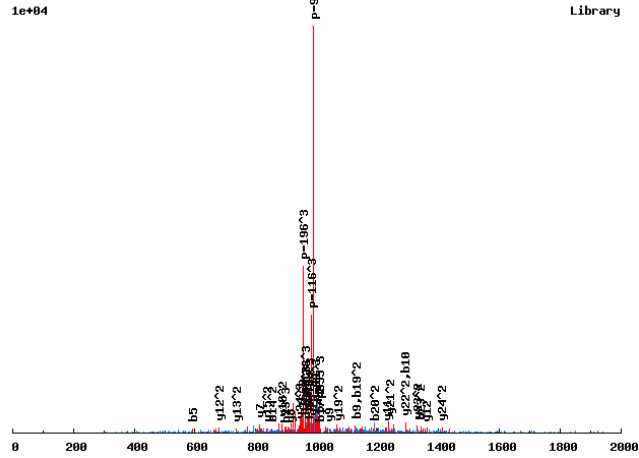

| Library | b <sup>1+</sup> | b <sup>2+</sup> | b <sup>3+</sup> | #  | AA     | #  | y <sup>1+</sup> | y <sup>2+</sup> | y <sup>3+</sup> |
|---------|-----------------|-----------------|-----------------|----|--------|----|-----------------|-----------------|-----------------|
|         | 102.0550        | 51.5311         | 34.6898         | 1  | T      | 26 |                 |                 |                 |
|         | 239.1139        | 120.0606        | 80.3761         | 2  | H      | 25 | 2960.1245       | 1480.5659       | 987.3797        |
|         | 406.1122        | 203.5598        | 136.0423        | 3  | S[167] | 24 | 2823.0655       | 1412.0364       | 941.6934        |
|         | 477.1493        | 239.0783        | 159.7213        | 4  | A      | 23 | 2656.0672       | 1328.5372       | 886.0272        |
|         | 592.1763        | 296.5918        | 198.0636        | 5  | D      | 22 | 2585.0301       | 1293.0187       | 862.3482        |
|         | 748.2774        | 374.6423        | 250.0973        | 6  | R      | 21 | 2470.0031       | 1235.5052       | 824.0059        |
|         | 915.2758        | 458.1415        | 305.7634        | 7  | S[167] | 20 | 2313.9020       | 1157.4547       | 771.9722        |
|         | 1012.3285       | 506.6679        | 338.1144        | 8  | P      | 19 | 2146.9037       | 1073.9555       | 716.3061        |
|         | 1125.4126       | 563.2099        | 375.8090        | 9  | L      | 18 | 2049.8509       | 1025.4291       | 683.9552        |
|         | 1292.4109       | 646.7091        | 431.4752        | 10 | S[167] | 17 | 1936.7668       | 968.8871        | 646.2605        |
|         | 1391.4793       | 696.2433        | 464.4980        | 11 | V      | 16 | 1769.7685       | 885.3879        | 590.5943        |
|         | 1519.5379       | 760.2726        | 507.1842        | 12 | Q      | 15 | 1670.7001       | 835.8537        | 557.5715        |
|         | 1590.5750       | 795.7912        | 530.8632        | 13 | A      | 14 | 1542.6415       | 771.8244        | 514.8854        |
|         | 1705.6020       | 853.3046        | 569.2055        | 14 | D      | 13 | 1471.6044       | 736.3058        | 491.2063        |
|         | 1834.6446       | 917.8259        | 612.2197        | 15 | E      | 12 | 1356.5774       | 678.7924        | 452.8640        |
|         | 1905.6817       | 953.3445        | 635.8987        | 16 | A      | 11 | 1227.5348       | 614.2711        | 409.8498        |
|         | 2020.7086       | 1010.8579       | 674.2411        | 17 | D      | 10 | 1156.4977       | 578.7525        | 386.1708        |
|         | 2149.7512       | 1075.3792       | 717.2553        | 18 | E      | 9  | 1041.4708       | 521.2390        | 347.8285        |
|         | 2248.8196       | 1124.9134       | 750.2781        | 19 | V      | 8  | 912.4282        | 456.7177        | 304.8143        |
|         | 2385.8785       | 1193.4429       | 795.9644        | 20 | H      | 7  | 813.3598        | 407.1835        | 271.7915        |
|         | 2499.9215       | 1250.4644       | 833.9787        | 21 | N      | 6  | 676.3009        | 338.6541        | 226.1052        |
|         | 2570.9586       | 1285.9829       | 857.6577        | 22 | A      | 5  | 562.2580        | 281.6326        | 188.0908        |
|         | 2685.9855       | 1343.4964       | 896.0000        | 23 | D      | 4  | 491.2208        | 246.1141        | 164.4118        |
|         | 2800.0284       | 1400.5179       | 934.0143        | 24 | N      | 3  | 376.1939        | 188.6006        | 126.0695        |
|         | 2887.0605       | 1444.0339       | 963.0250        | 25 | S      | 2  | 262.1510        | 131.5791        | 88.0552         |
|         |                 |                 |                 | 26 | R      | 1  | 175.1190        | 88.0631         | 59.0445         |

# Annotated spectra from Saleem et. al. 2009

K.T.<sub>181</sub>HST.<sub>181</sub>YAFESNTNSVAASQMR.N/3

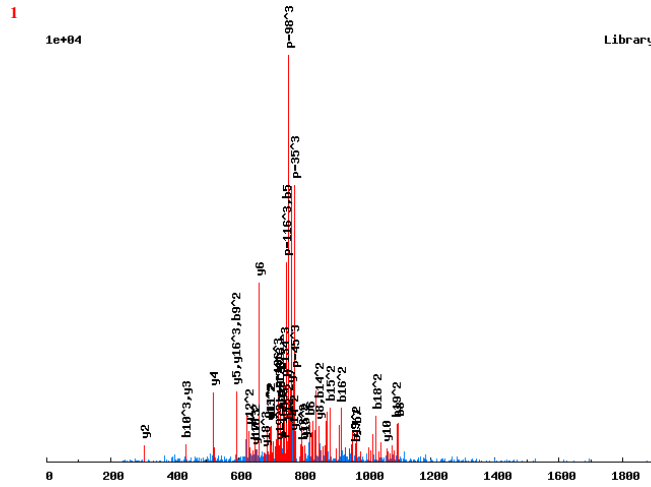

| Library | b <sup>1+</sup> | b <sup>2+</sup> | b <sup>3+</sup> | #  | AA     | #  | y <sup>1+</sup> | y <sup>2+</sup> | y <sup>3+</sup> |
|---------|-----------------|-----------------|-----------------|----|--------|----|-----------------|-----------------|-----------------|
|         | 182.0213        | 91.5143         | 61.3453         | 1  | T[181] | 20 |                 |                 |                 |
|         | 319.0802        | 160.0437        | 107.0316        | 2  | H      | 19 | 2180.9067       | 1090.9570       | 727.6404        |
|         | 406.1122        | 203.5598        | 136.0423        | 3  | S      | 18 | 2043.8478       | 1022.4275       | 681.9541        |
|         | 587.1262        | 294.0668        | 196.3803        | 4  | T[181] | 17 | 1956.8157       | 978.9115        | 652.9434        |
|         | 750.1896        | 375.5984        | 250.7347        | 5  | Y      | 16 | 1775.8017       | 888.4045        | 592.6054        |
|         | 821.2267        | 411.1170        | 274.4137        | 6  | A      | 15 | 1612.7384       | 806.8728        | 538.2510        |
|         | 968.2951        | 484.6512        | 323.4366        | 7  | F      | 14 | 1541.7013       | 771.3543        | 514.5719        |
|         | 1097.3377       | 549.1725        | 366.4507        | 8  | E      | 13 | 1394.6329       | 697.8201        | 465.5491        |
|         | 1184.3697       | 592.6885        | 395.4614        | 9  | S      | 12 | 1265.5903       | 633.2988        | 422.5349        |
|         | 1298.4126       | 649.7100        | 433.4757        | 10 | N      | 11 | 1178.5582       | 589.7828        | 393.5243        |
|         | 1399.4603       | 700.2338        | 467.1583        | 11 | T      | 10 | 1064.5153       | 532.7613        | 355.5100        |
|         | 1513.5033       | 757.2553        | 505.1726        | 12 | N      | 9  | 963.4676        | 482.2375        | 321.8274        |
|         | 1600.5353       | 800.7713        | 534.1833        | 13 | S      | 8  | 849.4247        | 425.2160        | 283.8131        |
|         | 1699.6037       | 850.3055        | 567.2061        | 14 | V      | 7  | 762.3927        | 381.7000        | 254.8024        |
|         | 1770.6408       | 885.8240        | 590.8851        | 15 | A      | 6  | 663.3243        | 332.1658        | 221.7796        |
|         | 1841.6779       | 921.3426        | 614.5642        | 16 | A      | 5  | 592.2872        | 296.6472        | 198.1006        |
|         | 1928.7099       | 964.8586        | 643.5748        | 17 | S      | 4  | 521.2501        | 261.1287        | 174.4215        |
|         | 2056.7685       | 1028.8879       | 686.2610        | 18 | Q      | 3  | 434.2180        | 217.6126        | 145.4109        |
|         | 2187.8090       | 1094.4081       | 729.9412        | 19 | M      | 2  | 306.1594        | 153.5834        | 102.7247        |
|         |                 |                 |                 | 20 | R      | 1  | 175.1190        | 88.0631         | 59.0445         |





Annotated spectra from Saleem et. al. 2009

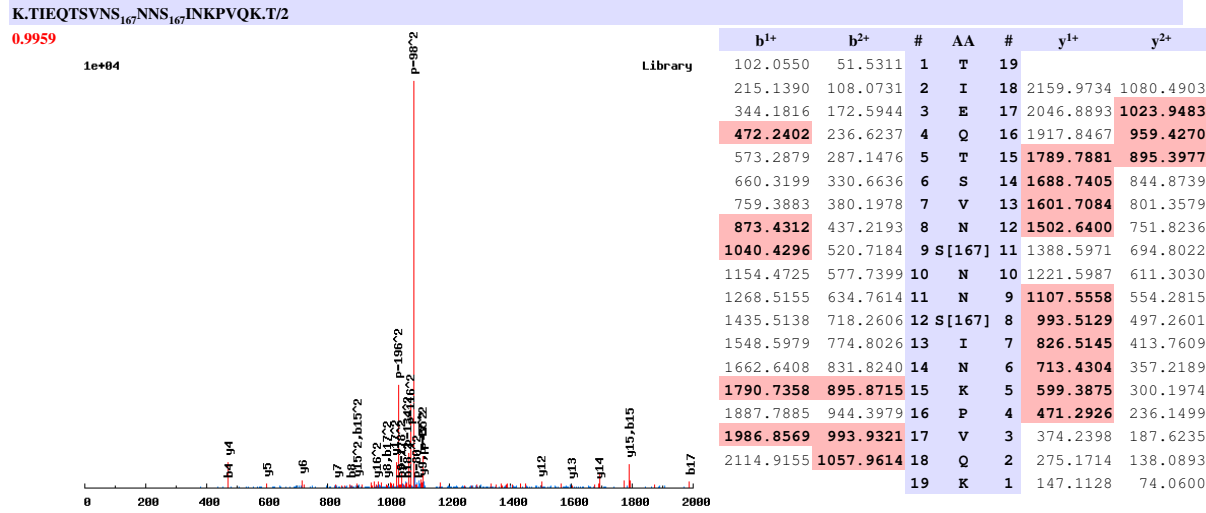

Annotated spectra from Saleem et. al. 2009

K.TIHS<sub>167</sub>GLDIDKVD<sub>ETMDEIR</sub>E/3

0.9984

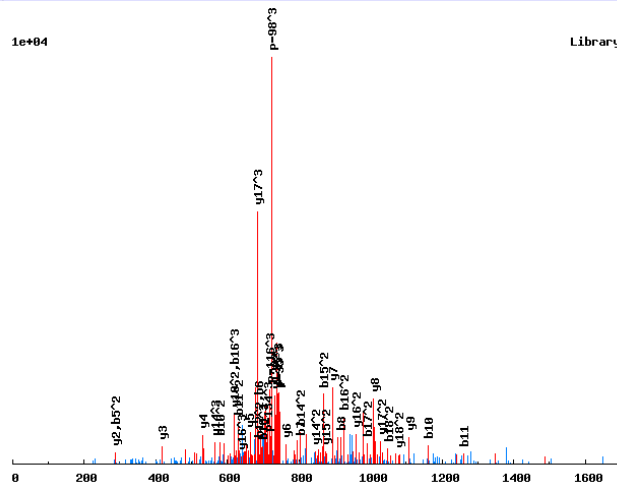

| Library | b <sup>1+</sup> | b <sup>2+</sup> | b <sup>3+</sup> | #  | AA     | #  | y <sup>1+</sup> | y <sup>2+</sup> | y <sup>3+</sup> |
|---------|-----------------|-----------------|-----------------|----|--------|----|-----------------|-----------------|-----------------|
|         | 102.0550        | 51.5311         | 34.6898         | 1  | T      | 19 |                 |                 |                 |
|         | 215.1390        | 108.0731        | 72.3845         | 2  | I      | 18 | 2165.9784       | 1083.4928       | 722.6643        |
|         | 352.1979        | 176.6026        | 118.0708        | 3  | H      | 17 | 2052.8943       | 1026.9508       | 684.9696        |
|         | 519.1963        | 260.1018        | 173.7370        | 4  | S[167] | 16 | 1915.8354       | 958.4214        | 639.2833        |
|         | 576.2178        | 288.6125        | 192.7441        | 5  | G      | 15 | 1748.8371       | 874.9222        | 583.6172        |
|         | 689.3018        | 345.1545        | 230.4388        | 6  | L      | 14 | 1691.8156       | 846.4114        | 564.6101        |
|         | 804.3288        | 402.6680        | 268.7811        | 7  | D      | 13 | 1578.7315       | 789.8694        | 526.9154        |
|         | 917.4128        | 459.2100        | 306.4758        | 8  | I      | 12 | 1463.7046       | 732.3559        | 488.5731        |
|         | 1032.4398       | 516.7235        | 344.8181        | 9  | D      | 11 | 1350.6205       | 675.8139        | 450.8784        |
|         | 1160.5347       | 580.7710        | 387.5164        | 10 | K      | 10 | 1235.5936       | 618.3004        | 412.5361        |
|         | 1259.6031       | 630.3052        | 420.5392        | 11 | V      | 9  | 1107.4986       | 554.2530        | 369.8377        |
|         | 1374.6301       | 687.8187        | 458.8815        | 12 | D      | 8  | 1008.4302       | 504.7188        | 336.8149        |
|         | 1503.6727       | 752.3400        | 501.8957        | 13 | E      | 7  | 893.4033        | 447.2053        | 298.4726        |
|         | 1604.7203       | 802.8638        | 535.5783        | 14 | T      | 6  | 764.3607        | 382.6840        | 255.4584        |
|         | 1735.7608       | 868.3841        | 579.2585        | 15 | M      | 5  | 663.3130        | 332.1602        | 221.7759        |
|         | 1850.7878       | 925.8975        | 617.6008        | 16 | D      | 4  | 532.2725        | 266.6399        | 178.0957        |
|         | 1979.8304       | 990.4188        | 660.6150        | 17 | E      | 3  | 417.2456        | 209.1264        | 139.7534        |
|         | 2092.9144       | 1046.9608       | 698.3097        | 18 | I      | 2  | 288.2030        | 144.6051        | 96.7392         |
|         |                 |                 |                 | 19 | R      | 1  | 175.1190        | 88.0631         | 59.0445         |

# Annotated spectra from Saleem et. al. 2009

R.T.<sub>181</sub>ISAGSGVST<sub>181</sub>PTMALNR.T/2

0.9994

1e+04

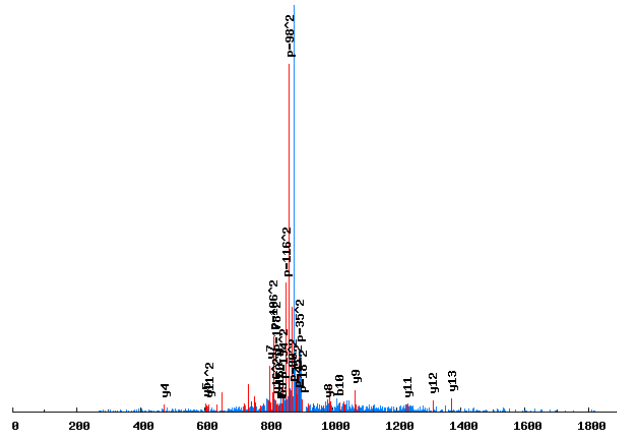

| Library | b <sup>1+</sup> | b <sup>2+</sup> | #  | AA | #     | y <sup>1+</sup> | y <sup>2+</sup> |          |
|---------|-----------------|-----------------|----|----|-------|-----------------|-----------------|----------|
|         | 182.0213        | 91.5143         | 1  | T  | [181] | 17              |                 |          |
|         | 295.1054        | 148.0563        | 2  | I  | 16    | 1641.7666       | 821.3869        |          |
|         | 382.1374        | 191.5723        | 3  | S  | 15    | 1528.6825       | 764.8449        |          |
|         | 453.1745        | 227.0909        | 4  | A  | 14    | 1441.6505       | 721.3289        |          |
|         | 510.1960        | 255.6016        | 5  | G  | 13    | 1370.6134       | 685.8103        |          |
|         | 597.2280        | 299.1176        | 6  | S  | 12    | 1313.5919       | 657.2996        |          |
|         | 654.2494        | 327.6284        | 7  | G  | 11    | 1226.5599       | 613.7836        |          |
|         | 753.3179        | 377.1626        | 8  | V  | 10    | 1169.5384       | 585.2729        |          |
|         | 840.3499        | 420.6786        | 9  | S  | 9     | 1070.4700       | 535.7387        |          |
|         | 1021.3639       | 511.1856        | 10 | T  | [181] | 8               | 983.4380        | 492.2226 |
|         | 1118.4167       | 559.7120        | 11 | P  | 7     | 802.4240        | 401.7156        |          |
|         | 1219.4643       | 610.2358        | 12 | T  | 6     | 705.3712        | 353.1893        |          |
|         | 1350.5048       | 675.7561        | 13 | M  | 5     | 604.3235        | 302.6654        |          |
|         | 1421.5419       | 711.2746        | 14 | A  | 4     | 473.2831        | 237.1452        |          |
|         | 1534.6260       | 767.8166        | 15 | L  | 3     | 402.2459        | 201.6266        |          |
|         | 1648.6689       | 824.8381        | 16 | N  | 2     | 289.1619        | 145.0846        |          |
|         |                 |                 | 17 | R  | 1     | 175.1190        | 88.0631         |          |

Annotated spectra from Saleem et. al. 2009

R.T.<sub>181</sub> ISRNNEVMRE/2

0.6858

1e+04

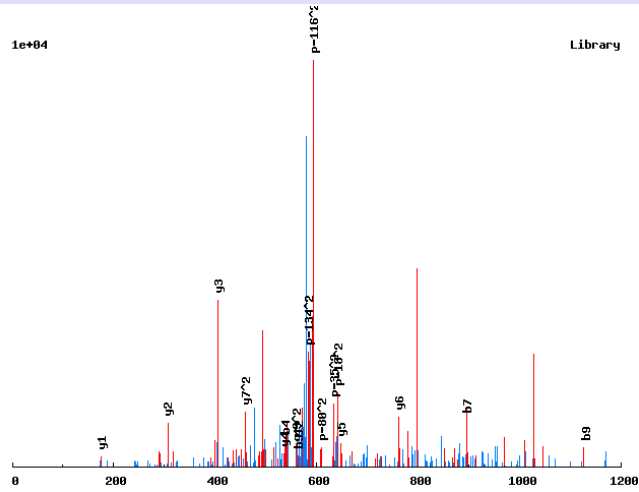

| Library | b <sup>1+</sup> | b <sup>2+</sup> | #  | AA | #     | y <sup>1+</sup> | y <sup>2+</sup> |
|---------|-----------------|-----------------|----|----|-------|-----------------|-----------------|
|         | 182.0213        | 91.5143         | 1  | T  | [181] | 10              |                 |
|         | 295.1054        | 148.0563        | 2  | I  | 9     | 1118.5735       | 559.7904        |
|         | 382.1374        | 191.5723        | 3  | S  | 8     | 1005.4894       | 503.2484        |
|         | 538.2385        | 269.6229        | 4  | R  | 7     | 918.4574        | 459.7323        |
|         | 652.2814        | 326.6444        | 5  | N  | 6     | 762.3563        | 381.6818        |
|         | 766.3244        | 383.6658        | 6  | N  | 5     | 648.3134        | 324.6603        |
|         | 895.3669        | 448.1871        | 7  | E  | 4     | 534.2704        | 267.6389        |
|         | 994.4354        | 497.7213        | 8  | V  | 3     | 405.2278        | 203.1176        |
|         | 1125.4758       | 563.2416        | 9  | M  | 2     | 306.1594        | 153.5834        |
|         |                 |                 | 10 | R  | 1     | 175.1190        | 88.0631         |

# Annotated spectra from Saleem et. al. 2009

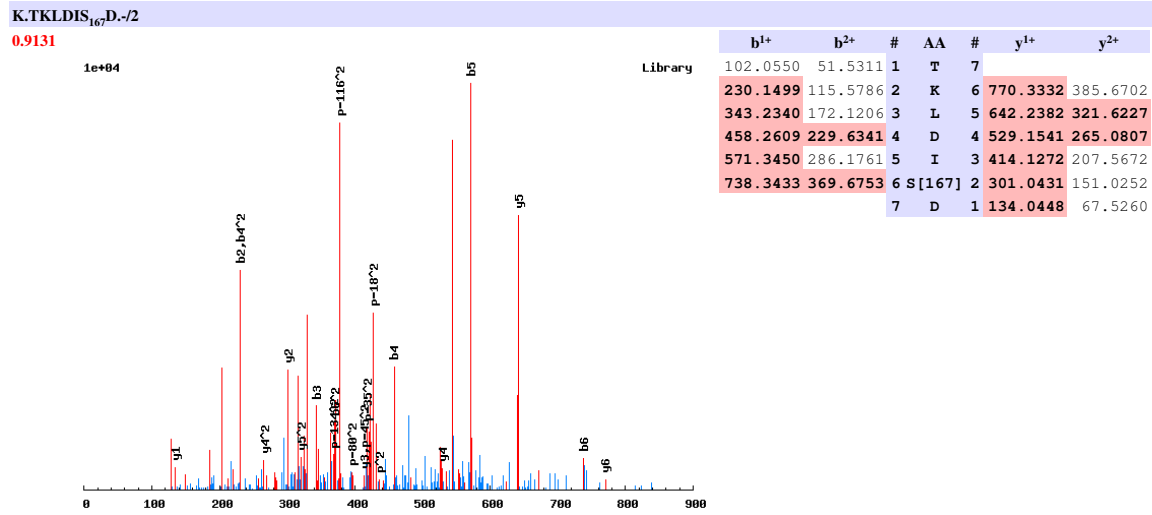

# Annotated spectra from Saleem et. al. 2009

K.TKNDTNEEGFFT<sub>181</sub>AS<sub>167</sub>EPEEASSQPWK.S/3

0.9982

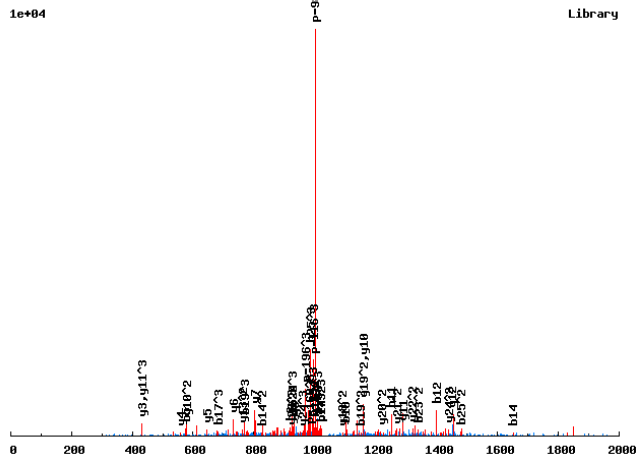

| Library | b <sup>1+</sup>  | b <sup>2+</sup>  | b <sup>3+</sup> | #         | AA | #                | y <sup>1+</sup>  | y <sup>2+</sup>  | y <sup>3+</sup> |
|---------|------------------|------------------|-----------------|-----------|----|------------------|------------------|------------------|-----------------|
|         | 102.0550         | 51.5311          | 34.6898         | 1         | T  | 26               |                  |                  |                 |
|         | 230.1499         | 115.5786         | 77.3882         | 2         | K  | 25               | 3003.1605        | 1502.0839        | 1001.7250       |
|         | 344.1928         | 172.6001         | 115.4025        | 3         | N  | 24               | 2875.0655        | <b>1438.0364</b> | <b>959.0267</b> |
|         | 459.2198         | 230.1135         | 153.7448        | 4         | D  | 23               | 2761.0226        | 1381.0149        | <b>921.0124</b> |
|         | <b>574.2467</b>  | 287.6270         | 192.0871        | 5         | D  | 22               | 2645.9956        | <b>1323.5015</b> | 882.6701        |
|         | 675.2944         | 338.1508         | 225.7697        | 6         | T  | 21               | 2530.9687        | <b>1265.9880</b> | 844.3278        |
|         | 789.3373         | 395.1723         | 263.7840        | 7         | N  | 20               | 2429.9210        | <b>1215.4642</b> | 810.6452        |
|         | <b>918.3799</b>  | 459.6936         | 306.7982        | 8         | E  | 19               | 2315.8781        | <b>1158.4427</b> | 772.6309        |
|         | 1047.4225        | 524.2149         | 349.8124        | 9         | E  | 18               | 2186.8355        | <b>1093.9214</b> | 729.6167        |
|         | <b>1104.4440</b> | 552.7256         | 368.8195        | 10        | G  | 17               | 2057.7929        | 1029.4001        | 686.6025        |
|         | <b>1251.5124</b> | 626.2598         | 417.8423        | 11        | F  | 16               | 2000.7715        | <b>1000.8894</b> | 667.5953        |
|         | <b>1398.5808</b> | 699.7940         | 466.8651        | 12        | F  | 15               | 1853.7030        | <b>927.3552</b>  | 618.5725        |
|         | 1579.5948        | 790.3010         | 527.2031        | 13 T[181] | 14 | 1706.6346        | 853.8210         | 569.5497         |                 |
|         | <b>1650.6319</b> | <b>825.8196</b>  | 550.8822        | 14        | A  | 13               | 1525.6206        | <b>763.3140</b>  | 509.2117        |
|         | 1817.6303        | 909.3188         | 606.5483        | 15 S[167] | 12 | <b>1454.5835</b> | 727.7954         | 485.5327         |                 |
|         | 1946.6729        | 973.8401         | 649.5625        | 16        | E  | 11               | <b>1287.5851</b> | 644.2962         | <b>429.8666</b> |
|         | 2043.7256        | <b>1022.3665</b> | <b>681.9134</b> | 17        | P  | 10               | <b>1158.5426</b> | <b>579.7749</b>  | 386.8524        |
|         | 2172.7682        | 1086.8878        | 724.9276        | 18        | E  | 9                | 1061.4898        | 531.2485         | 354.5015        |
|         | 2301.8108        | <b>1151.4090</b> | <b>767.9418</b> | 19        | E  | 8                | <b>932.4472</b>  | 466.7272         | 311.4873        |
|         | 2372.8479        | 1186.9276        | 791.6208        | 20        | A  | 7                | <b>803.4046</b>  | 402.2060         | 268.4731        |
|         | 2459.8800        | 1230.4436        | 820.6315        | 21        | S  | 6                | <b>732.3675</b>  | 366.6874         | 244.7940        |
|         | 2546.9120        | 1273.9596        | 849.6422        | 22        | S  | 5                | <b>645.3355</b>  | 323.1714         | 215.7833        |
|         | 2674.9706        | <b>1337.9889</b> | 892.3284        | 23        | Q  | 4                | <b>558.3035</b>  | 279.6554         | 186.7727        |
|         | 2772.0233        | 1386.5153        | <b>924.6793</b> | 24        | P  | 3                | <b>430.2449</b>  | 215.6261         | 144.0865        |
|         | 2958.1026        | <b>1479.5550</b> | <b>986.7057</b> | 25        | W  | 2                | 333.1921         | 167.0997         | 111.7356        |
|         |                  |                  |                 | 26        | K  | 1                | 147.1128         | 74.0600          | 49.7091         |

# Annotated spectra from Saleem et. al. 2009

K.TK<sub>136</sub>S<sub>167</sub>AQS<sub>167</sub>STETFSK<sub>136</sub>-D/2

0.9904

1e+04

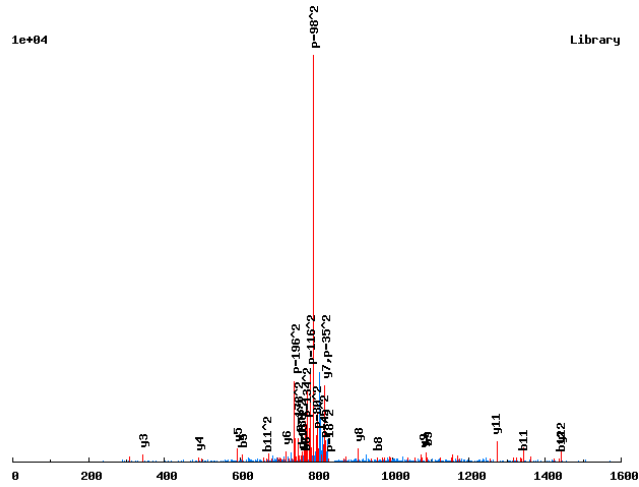

| Library | b <sup>1+</sup> | b <sup>2+</sup> | #  | AA     | #  | y <sup>1+</sup> | y <sup>2+</sup> |
|---------|-----------------|-----------------|----|--------|----|-----------------|-----------------|
|         | 102.0550        | 51.5311         | 1  | T      | 14 |                 |                 |
|         | 238.1641        | 119.5857        | 2  | K[136] | 13 | 1577.6467       | 789.3270        |
|         | 405.1625        | 203.0849        | 3  | S[167] | 12 | 1441.5375       | 721.2724        |
|         | 476.1996        | 238.6034        | 4  | A      | 11 | 1274.5391       | 637.7732        |
|         | 604.2582        | 302.6327        | 5  | Q      | 10 | 1203.5020       | 602.2547        |
|         | 771.2565        | 386.1319        | 6  | S[167] | 9  | 1075.4435       | 538.2254        |
|         | 858.2886        | 429.6479        | 7  | S      | 8  | 908.4451        | 454.7262        |
|         | 959.3362        | 480.1718        | 8  | T      | 7  | 821.4131        | 411.2102        |
|         | 1088.3788       | 544.6931        | 9  | E      | 6  | 720.3654        | 360.6863        |
|         | 1189.4265       | 595.2169        | 10 | T      | 5  | 591.3228        | 296.1650        |
|         | 1336.4949       | 668.7511        | 11 | F      | 4  | 490.2751        | 245.6412        |
|         | 1437.5426       | 719.2749        | 12 | T      | 3  | 343.2067        | 172.1070        |
|         | 1524.5746       | 762.7910        | 13 | S      | 2  | 242.1590        | 121.5832        |
|         |                 |                 | 14 | K[136] | 1  | 155.1270        | 78.0671         |

# Annotated spectra from Saleem et. al. 2009

R.TKSGES<sub>167</sub>T<sub>181</sub>GKVVAAETTYIDTPDET.K/3

0.9991

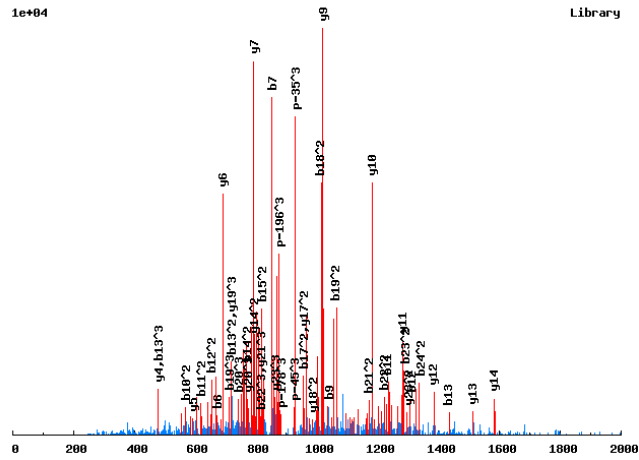

| Library | b <sup>1+</sup>  | b <sup>2+</sup>  | b <sup>3+</sup> | #  | AA     | #  | y <sup>1+</sup>  | y <sup>2+</sup>  | y <sup>3+</sup> |
|---------|------------------|------------------|-----------------|----|--------|----|------------------|------------------|-----------------|
|         | 102.0550         | 51.5311          | 34.6898         | 1  | T      | 25 |                  |                  |                 |
|         | 230.1499         | 115.5786         | 77.3882         | 2  | K      | 24 | 2717.1842        | 1359.0957        | 906.3996        |
|         | 317.1819         | 159.0946         | 106.3988        | 3  | S      | 23 | 2589.0892        | <b>1295.0482</b> | <b>863.7013</b> |
|         | 374.2034         | 187.6053         | 125.4060        | 4  | G      | 22 | 2502.0572        | 1251.5322        | 834.6906        |
|         | 503.2460         | 252.1266         | 168.4202        | 5  | E      | 21 | 2445.0357        | 1223.0215        | <b>815.6834</b> |
|         | <b>670.2444</b>  | 335.6258         | 224.0863        | 6  | S[167] | 20 | 2315.9931        | 1158.5002        | <b>772.6692</b> |
|         | <b>851.2584</b>  | 426.1328         | 284.4243        | 7  | T[181] | 19 | 2148.9948        | 1075.0010        | <b>717.0031</b> |
|         | 908.2798         | 454.6436         | 303.4315        | 8  | G      | 18 | 1967.9808        | <b>984.4940</b>  | 656.6651        |
|         | <b>1036.3748</b> | 518.6910         | 346.1298        | 9  | K      | 17 | 1910.9593        | <b>955.9833</b>  | 637.6580        |
|         | 1135.4432        | <b>568.2252</b>  | 379.1526        | 10 | V      | 16 | 1782.8643        | 891.9358         | 594.9596        |
|         | <b>1234.5116</b> | <b>617.7594</b>  | 412.1754        | 11 | V      | 15 | 1683.7959        | 842.4016         | 561.9368        |
|         | <b>1305.5487</b> | <b>653.2780</b>  | 435.8544        | 12 | A      | 14 | <b>1584.7275</b> | <b>792.8674</b>  | 528.9140        |
|         | <b>1434.5913</b> | <b>717.7993</b>  | <b>478.8686</b> | 13 | E      | 13 | <b>1513.6904</b> | 757.3488         | 505.2350        |
|         | 1535.6390        | <b>768.3231</b>  | 512.5512        | 14 | T      | 12 | <b>1384.6478</b> | 692.8275         | 462.2208        |
|         | 1636.6867        | <b>818.8470</b>  | 546.2337        | 15 | T      | 11 | <b>1283.6001</b> | 642.3037         | 428.5382        |
|         | 1799.7500        | 900.3786         | 600.5882        | 16 | Y      | 10 | <b>1182.5525</b> | 591.7799         | 394.8557        |
|         | 1912.8341        | <b>956.9207</b>  | 638.2829        | 17 | I      | 9  | <b>1019.4891</b> | 510.2482         | 340.5012        |
|         | 2027.8610        | <b>1014.4341</b> | 676.6252        | 18 | D      | 8  | 906.4051         | 453.7062         | 302.8065        |
|         | 2128.9087        | <b>1064.9580</b> | <b>710.3077</b> | 19 | T      | 7  | <b>791.3781</b>  | 396.1927         | 264.4642        |
|         | 2225.9614        | 1113.4844        | <b>742.6587</b> | 20 | P      | 6  | <b>690.3305</b>  | 345.6689         | 230.7817        |
|         | 2340.9884        | <b>1170.9978</b> | 781.0010        | 21 | D      | 5  | <b>593.2777</b>  | 297.1425         | 198.4308        |
|         | 2442.0361        | <b>1221.5217</b> | <b>814.6835</b> | 22 | T      | 4  | <b>478.2507</b>  | 239.6290         | 160.0884        |
|         | 2571.0787        | <b>1286.0430</b> | 857.6977        | 23 | E      | 3  | 377.2031         | 189.1052         | 126.4059        |
|         | 2672.1263        | <b>1336.5668</b> | 891.3803        | 24 | T      | 2  | 248.1605         | 124.5839         | 83.3917         |
|         |                  |                  |                 | 25 | K      | 1  | 147.1128         | 74.0600          | 49.7091         |



# Annotated spectra from Saleem et. al. 2009

K.TKSPEQEK<sub>167</sub>AT<sub>181</sub>PPSSITAAK.T/3

0.9393

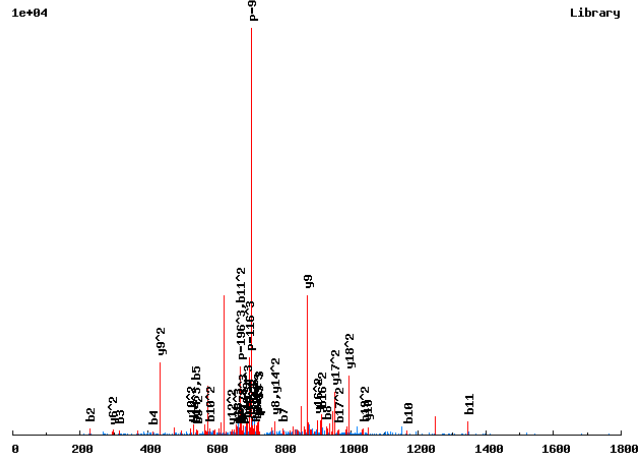

| Library | b <sup>1+</sup> | b <sup>2+</sup> | b <sup>3+</sup> | #  | AA     | #  | y <sup>1+</sup> | y <sup>2+</sup> | y <sup>3+</sup> |
|---------|-----------------|-----------------|-----------------|----|--------|----|-----------------|-----------------|-----------------|
|         | 102.0550        | 51.5311         | 34.6898         | 1  | T      | 20 |                 |                 |                 |
|         | 230.1499        | 115.5786        | 77.3882         | 2  | K      | 19 | 2116.9563       | 1058.9818       | 706.3236        |
|         | 317.1819        | 159.0946        | 106.3988        | 3  | S      | 18 | 1988.8613       | 994.9343        | 663.6253        |
|         | 414.2347        | 207.6210        | 138.7498        | 4  | P      | 17 | 1901.8293       | 951.4183        | 634.6146        |
|         | 543.2773        | 272.1423        | 181.7640        | 5  | E      | 16 | 1804.7765       | 902.8919        | 602.2637        |
|         | 671.3359        | 336.1716        | 224.4501        | 6  | Q      | 15 | 1675.7340       | 838.3706        | 559.2495        |
|         | 800.3785        | 400.6929        | 267.4643        | 7  | E      | 14 | 1547.6754       | 774.3413        | 516.5633        |
|         | 928.4734        | 464.7404        | 310.1627        | 8  | K      | 13 | 1418.6328       | 709.8200        | 473.5491        |
|         | 1095.4718       | 548.2395        | 365.8288        | 9  | S[167] | 12 | 1290.5378       | 645.7726        | 430.8508        |
|         | 1166.5089       | 583.7581        | 389.5078        | 10 | A      | 11 | 1123.5395       | 562.2734        | 375.1847        |
|         | 1347.5229       | 674.2651        | 449.8458        | 11 | T[181] | 10 | 1052.5024       | 526.7548        | 351.5056        |
|         | 1444.5757       | 722.7915        | 482.1967        | 12 | P      | 9  | 871.4883        | 436.2478        | 291.1676        |
|         | 1541.6284       | 771.3179        | 514.5477        | 13 | P      | 8  | 774.4356        | 387.7214        | 258.8167        |
|         | 1628.6605       | 814.8339        | 543.5583        | 14 | S      | 7  | 677.3828        | 339.1951        | 226.4658        |
|         | 1715.6925       | 858.3499        | 572.5690        | 15 | S      | 6  | 590.3508        | 295.6790        | 197.4551        |
|         | 1828.7766       | 914.8919        | 610.2637        | 16 | I      | 5  | 503.3188        | 252.1630        | 168.4444        |
|         | 1929.8242       | 965.4158        | 643.9463        | 17 | T      | 4  | 390.2347        | 195.6210        | 130.7498        |
|         | 2000.8613       | 1000.9343       | 667.6253        | 18 | A      | 3  | 289.1870        | 145.0971        | 97.0672         |
|         | 2071.8985       | 1036.4529       | 691.3043        | 19 | A      | 2  | 218.1499        | 109.5786        | 73.3882         |
|         |                 |                 |                 | 20 | K      | 1  | 147.1128        | 74.0600         | 49.7091         |

# Annotated spectra from Saleem et. al. 2009

K.TKS<sub>167</sub>PEQEK<sub>S</sub><sub>167</sub>AT<sub>181</sub>PPSSITAAK.T/3

0.9786

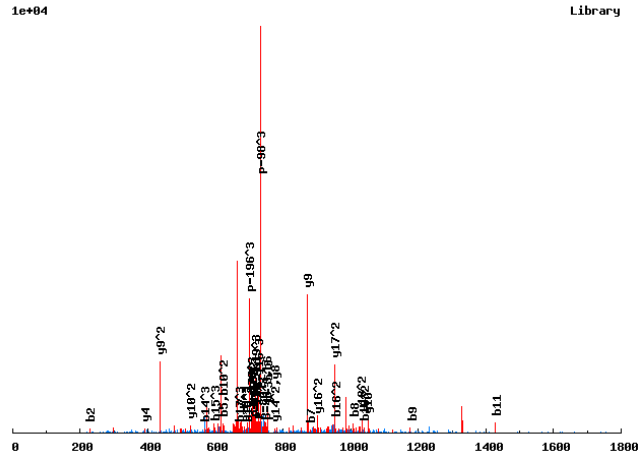

| Library | b <sup>1+</sup>  | b <sup>2+</sup>  | b <sup>3+</sup> | #  | AA     | #  | y <sup>1+</sup>  | y <sup>2+</sup>  | y <sup>3+</sup> |
|---------|------------------|------------------|-----------------|----|--------|----|------------------|------------------|-----------------|
|         | 102.0550         | 51.5311          | 34.6898         | 1  | T      | 20 |                  |                  |                 |
|         | <b>230.1499</b>  | 115.5786         | 77.3882         | 2  | K      | 19 | 2196.9226        | 1098.9650        | 732.9791        |
|         | 397.1483         | 199.0778         | 133.0543        | 3  | S[167] | 18 | 2068.8277        | <b>1034.9175</b> | <b>690.2807</b> |
|         | 494.2010         | 247.6042         | 165.4052        | 4  | P      | 17 | 1901.8293        | <b>951.4183</b>  | 634.6146        |
|         | <b>623.2436</b>  | 312.1255         | 208.4194        | 5  | E      | 16 | 1804.7765        | <b>902.8919</b>  | 602.2637        |
|         | <b>751.3022</b>  | 376.1547         | 251.1056        | 6  | Q      | 15 | 1675.7340        | 838.3706         | 559.2495        |
|         | <b>880.3448</b>  | 440.6760         | 294.1198        | 7  | E      | 14 | 1547.6754        | <b>774.3413</b>  | 516.5633        |
|         | <b>1008.4398</b> | 504.7235         | 336.8181        | 8  | K      | 13 | 1418.6328        | <b>709.8200</b>  | 473.5491        |
|         | <b>1175.4381</b> | 588.2227         | 392.4842        | 9  | S[167] | 12 | 1290.5378        | 645.7726         | 430.8508        |
|         | 1246.4752        | <b>623.7413</b>  | 416.1633        | 10 | A      | 11 | 1123.5395        | 562.2734         | 375.1847        |
|         | <b>1427.4892</b> | <b>714.2483</b>  | 476.5013        | 11 | T[181] | 10 | <b>1052.5024</b> | <b>526.7548</b>  | 351.5056        |
|         | 1524.5420        | 762.7746         | 508.8522        | 12 | P      | 9  | <b>871.4883</b>  | <b>436.2478</b>  | 291.1676        |
|         | 1621.5948        | 811.3010         | 541.2031        | 13 | P      | 8  | <b>774.4356</b>  | 387.7214         | 258.8167        |
|         | 1708.6268        | 854.8170         | <b>570.2138</b> | 14 | S      | 7  | <b>677.3828</b>  | 339.1951         | 226.4658        |
|         | 1795.6588        | 898.3331         | <b>599.2245</b> | 15 | S      | 6  | 590.3508         | 295.6790         | 197.4551        |
|         | 1908.7429        | <b>954.8751</b>  | 636.9191        | 16 | I      | 5  | 503.3188         | 252.1630         | 168.4444        |
|         | 2009.7906        | 1005.3989        | <b>670.6017</b> | 17 | T      | 4  | <b>390.2347</b>  | 195.6210         | 130.7498        |
|         | 2080.8277        | <b>1040.9175</b> | <b>694.2807</b> | 18 | A      | 3  | 289.1870         | 145.0971         | 97.0672         |
|         | 2151.8648        | 1076.4360        | <b>717.9598</b> | 19 | A      | 2  | 218.1499         | 109.5786         | 73.3882         |
|         |                  |                  |                 | 20 | K      | 1  | 147.1128         | 74.0600          | 49.7091         |

# Annotated spectra from Saleem et. al. 2009

K.TK<sub>136</sub>S<sub>167</sub>SIS<sub>167</sub>DNENEAGEK<sub>136</sub>K/2

0.9972

1e+04

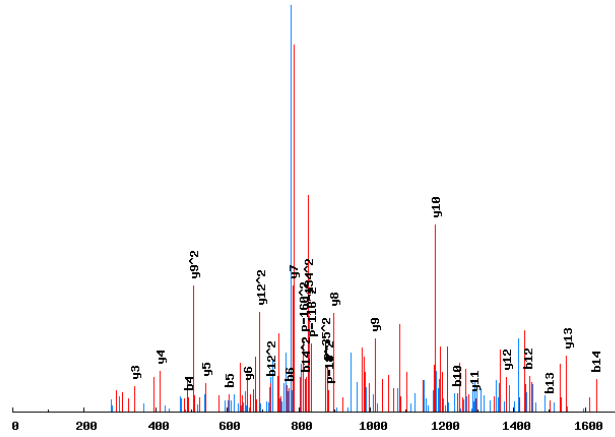

Library

|  | b <sup>1+</sup> | b <sup>2+</sup> | #  | AA     | #  | y <sup>1+</sup> | y <sup>2+</sup> |
|--|-----------------|-----------------|----|--------|----|-----------------|-----------------|
|  | 102.0550        | 51.5311         | 1  | T      | 15 |                 |                 |
|  | 238.1641        | 119.5857        | 2  | K[136] | 14 | 1683.6481       | 842.3277        |
|  | 405.1625        | 203.0849        | 3  | S[167] | 13 | 1547.5390       | 774.2731        |
|  | 492.1945        | 246.6009        | 4  | S      | 12 | 1380.5406       | 690.7739        |
|  | 605.2786        | 303.1429        | 5  | I      | 11 | 1293.5086       | 647.2579        |
|  | 772.2769        | 386.6421        | 6  | S[167] | 10 | 1180.4245       | 590.7159        |
|  | 887.3039        | 444.1556        | 7  | D      | 9  | 1013.4261       | 507.2167        |
|  | 1001.3468       | 501.1770        | 8  | N      | 8  | 898.3992        | 449.7032        |
|  | 1130.3894       | 565.6983        | 9  | E      | 7  | 784.3563        | 392.6818        |
|  | 1244.4323       | 622.7198        | 10 | N      | 6  | 655.3137        | 328.1605        |
|  | 1373.4749       | 687.2411        | 11 | E      | 5  | 541.2707        | 271.1390        |
|  | 1444.5120       | 722.7597        | 12 | A      | 4  | 412.2282        | 206.6177        |
|  | 1501.5335       | 751.2704        | 13 | G      | 3  | 341.1910        | 171.0992        |
|  | 1630.5761       | 815.7917        | 14 | E      | 2  | 284.1696        | 142.5884        |
|  |                 |                 | 15 | K[136] | 1  | 155.1270        | 78.0671         |

Annotated spectra from Saleem et. al. 2009

K.TKS<sub>167</sub>-SS<sub>167</sub>-SLVEEYPQK.K/2

0.9054

1e+04

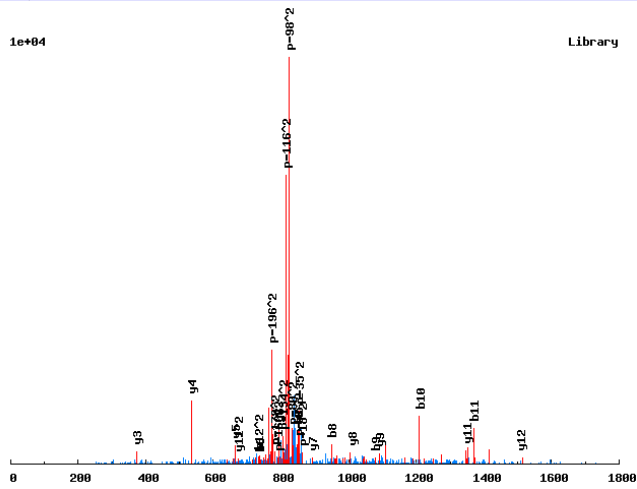

| Library | b <sup>1+</sup> | b <sup>2+</sup> | #  | AA     | #  | y <sup>1+</sup> | y <sup>2+</sup> |
|---------|-----------------|-----------------|----|--------|----|-----------------|-----------------|
|         | 102.0550        | 51.5311         | 1  | T      | 14 |                 |                 |
|         | 230.1499        | 115.5786        | 2  | K      | 13 | 1641.6809       | 821.3441        |
|         | 397.1483        | 199.0778        | 3  | S[167] | 12 | 1513.5859       | 757.2966        |
|         | 484.1803        | 242.5938        | 4  | S      | 11 | 1346.5875       | 673.7974        |
|         | 651.1787        | 326.0930        | 5  | S[167] | 10 | 1259.5555       | 630.2814        |
|         | 738.2107        | 369.6090        | 6  | S      | 9  | 1092.5572       | 546.7822        |
|         | 851.2948        | 426.1510        | 7  | L      | 8  | 1005.5251       | 503.2662        |
|         | 950.3632        | 475.6852        | 8  | V      | 7  | 892.4411        | 446.7242        |
|         | 1079.4058       | 540.2065        | 9  | E      | 6  | 793.3727        | 397.1900        |
|         | 1208.4484       | 604.7278        | 10 | E      | 5  | 664.3301        | 332.6687        |
|         | 1371.5117       | 686.2595        | 11 | Y      | 4  | 535.2875        | 268.1474        |
|         | 1468.5644       | 734.7859        | 12 | P      | 3  | 372.2241        | 186.6157        |
|         | 1596.6230       | 798.8152        | 13 | Q      | 2  | 275.1714        | 138.0893        |
|         |                 |                 | 14 | K      | 1  | 147.1128        | 74.0600         |

# Annotated spectra from Saleem et. al. 2009

R.TKS<sub>167</sub>SVALATAQR.G/2

0.9996

1e+04

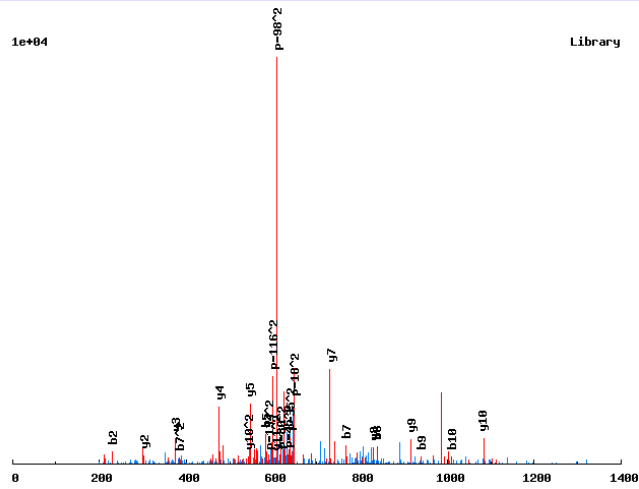

| Library | b <sup>1+</sup>  | b <sup>2+</sup> | #  | AA     | #  | y <sup>1+</sup> | y <sup>2+</sup> |
|---------|------------------|-----------------|----|--------|----|-----------------|-----------------|
|         | 102.0550         | 51.5311         | 1  | T      | 12 |                 |                 |
|         | <b>230.1499</b>  | 115.5786        | 2  | K      | 11 | 1211.6144       | <b>606.3108</b> |
|         | 397.1483         | 199.0778        | 3  | S[167] | 10 | 1083.5194       | <b>542.2633</b> |
|         | 484.1803         | 242.5938        | 4  | S      | 9  | 916.5210        | 458.7642        |
|         | <b>583.2487</b>  | 292.1280        | 5  | V      | 8  | 829.4890        | 415.2481        |
|         | 654.2858         | 327.6466        | 6  | A      | 7  | <b>730.4206</b> | 365.7139        |
|         | <b>767.3699</b>  | <b>384.1886</b> | 7  | L      | 6  | 659.3835        | 330.1954        |
|         | <b>838.4070</b>  | 419.7071        | 8  | A      | 5  | <b>546.2994</b> | 273.6534        |
|         | <b>939.4547</b>  | 470.2310        | 9  | T      | 4  | <b>475.2623</b> | 238.1348        |
|         | <b>1010.4918</b> | 505.7495        | 10 | A      | 3  | <b>374.2146</b> | 187.6110        |
|         | 1138.5504        | 569.7788        | 11 | Q      | 2  | <b>303.1775</b> | 152.0924        |
|         |                  |                 | 12 | R      | 1  | 175.1190        | 88.0631         |

# Annotated spectra from Saleem et. al. 2009

K.TLPFTDDQR<sub>166</sub>S<sub>167</sub>NPELDPTNS<sub>167</sub>VVDVSR<sub>166</sub>G/3

0.7114

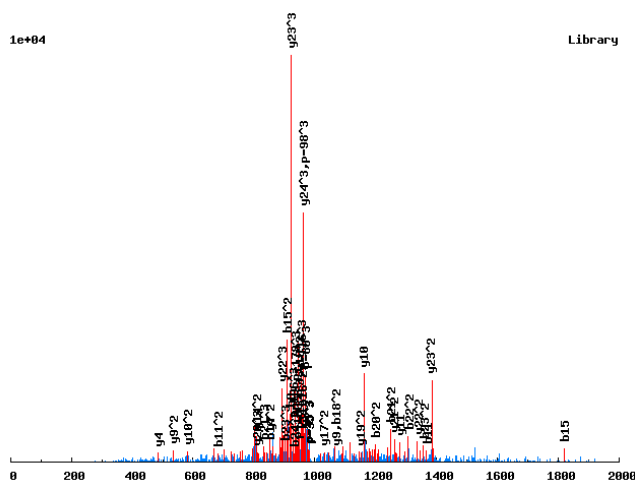

| Library | b <sup>1+</sup> | b <sup>2+</sup> | b <sup>3+</sup> | #  | AA     | #  | y <sup>1+</sup> | y <sup>2+</sup> | y <sup>3+</sup> |
|---------|-----------------|-----------------|-----------------|----|--------|----|-----------------|-----------------|-----------------|
|         | 102.0550        | 51.5311         | 34.6898         | 1  | T      | 25 |                 |                 |                 |
|         | 215.1390        | 108.0731        | 72.3845         | 2  | L      | 24 | 2881.2555       | 1441.1314       | 961.0900        |
|         | 312.1918        | 156.5995        | 104.7354        | 3  | P      | 23 | 2768.1715       | 1384.5894       | 923.3953        |
|         | 459.2602        | 230.1337        | 153.7582        | 4  | F      | 22 | 2671.1187       | 1336.0630       | 891.0444        |
|         | 560.3079        | 280.6576        | 187.4408        | 5  | T      | 21 | 2524.0503       | 1262.5288       | 842.0216        |
|         | 675.3348        | 338.1710        | 225.7831        | 6  | D      | 20 | 2423.0026       | 1212.0050       | 808.3391        |
|         | 790.3617        | 395.6845        | 264.1254        | 7  | D      | 19 | 2307.9757       | 1154.4915       | 769.9967        |
|         | 918.4203        | 459.7138        | 306.8116        | 8  | Q      | 18 | 2192.9488       | 1096.9780       | 731.6544        |
|         | 1084.5297       | 542.7685        | 362.1814        | 9  | R[166] | 17 | 2064.8902       | 1032.9487       | 688.9682        |
|         | 1251.5281       | 626.2677        | 417.8475        | 10 | S[167] | 16 | 1898.7808       | 949.8940        | 633.5985        |
|         | 1365.5710       | 683.2891        | 455.8619        | 11 | N      | 15 | 1731.7824       | 866.3949        | 577.9323        |
|         | 1462.6238       | 731.8155        | 488.2128        | 12 | P      | 14 | 1617.7395       | 809.3734        | 539.9180        |
|         | 1591.6664       | 796.3368        | 531.2270        | 13 | E      | 13 | 1520.6867       | 760.8470        | 507.5671        |
|         | 1704.7504       | 852.8788        | 568.9217        | 14 | L      | 12 | 1391.6441       | 696.3257        | 464.5529        |
|         | 1819.7774       | 910.3923        | 607.2640        | 15 | D      | 11 | 1278.5601       | 639.7837        | 426.8582        |
|         | 1916.8301       | 958.9187        | 639.6149        | 16 | P      | 10 | 1163.5331       | 582.2702        | 388.5159        |
|         | 2017.8778       | 1009.4425       | 673.2975        | 17 | T      | 9  | 1066.4804       | 533.7438        | 356.1650        |
|         | 2131.9207       | 1066.4640       | 711.3118        | 18 | N      | 8  | 965.4327        | 483.2200        | 322.4824        |
|         | 2298.9191       | 1149.9632       | 766.9779        | 19 | S[167] | 7  | 851.3898        | 426.1985        | 284.4681        |
|         | 2397.9875       | 1199.4974       | 800.0007        | 20 | V      | 6  | 684.3914        | 342.6993        | 228.8020        |
|         | 2497.0559       | 1249.0316       | 833.0235        | 21 | V      | 5  | 585.3230        | 293.1651        | 195.7792        |
|         | 2612.0828       | 1306.5451       | 871.3658        | 22 | D      | 4  | 486.2546        | 243.6309        | 162.7564        |
|         | 2711.1513       | 1356.0793       | 904.3886        | 23 | V      | 3  | 371.2277        | 186.1175        | 124.4141        |
|         | 2798.1833       | 1399.5953       | 933.3993        | 24 | S      | 2  | 272.1592        | 136.5833        | 91.3913         |
|         |                 |                 |                 | 25 | R[166] | 1  | 185.1272        | 93.0672         | 62.3806         |

# Annotated spectra from Saleem et. al. 2009

R.TLS<sub>167</sub>ATS<sub>167</sub>QLSATFNK<sub>136</sub>-L/2

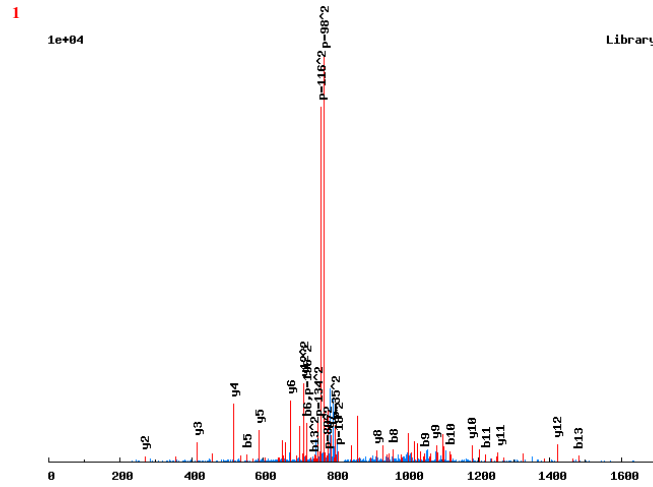

| Library | b <sup>1+</sup> | b <sup>2+</sup> | #  | AA     | #  | y <sup>1+</sup> | y <sup>2+</sup> |
|---------|-----------------|-----------------|----|--------|----|-----------------|-----------------|
|         | 102.0550        | 51.5311         | 1  | T      | 14 |                 |                 |
|         | 215.1390        | 108.0731        | 2  | L      | 13 | 1535.6634       | 768.3353        |
|         | 382.1374        | 191.5723        | 3  | S[167] | 12 | 1422.5793       | 711.7933        |
|         | 453.1745        | 227.0909        | 4  | A      | 11 | 1255.5809       | 628.2941        |
|         | 554.2222        | 277.6147        | 5  | T      | 10 | 1184.5438       | 592.7756        |
|         | 721.2205        | 361.1139        | 6  | S[167] | 9  | 1083.4962       | 542.2517        |
|         | 849.2791        | 425.1432        | 7  | Q      | 8  | 916.4978        | 458.7525        |
|         | 962.3632        | 481.6852        | 8  | L      | 7  | 788.4392        | 394.7232        |
|         | 1049.3952       | 525.2012        | 9  | S      | 6  | 675.3552        | 338.1812        |
|         | 1120.4323       | 560.7198        | 10 | A      | 5  | 588.3231        | 294.6652        |
|         | 1221.4800       | 611.2436        | 11 | T      | 4  | 517.2860        | 259.1466        |
|         | 1368.5484       | 684.7778        | 12 | F      | 3  | 416.2383        | 208.6228        |
|         | 1482.5913       | 741.7993        | 13 | N      | 2  | 269.1699        | 135.0886        |
|         |                 |                 | 14 | K[136] | 1  | 155.1270        | 78.0671         |

# Annotated spectra from Saleem et. al. 2009

R.TLS<sub>167</sub>DNETITSR.K/2

0.9779

1e+04

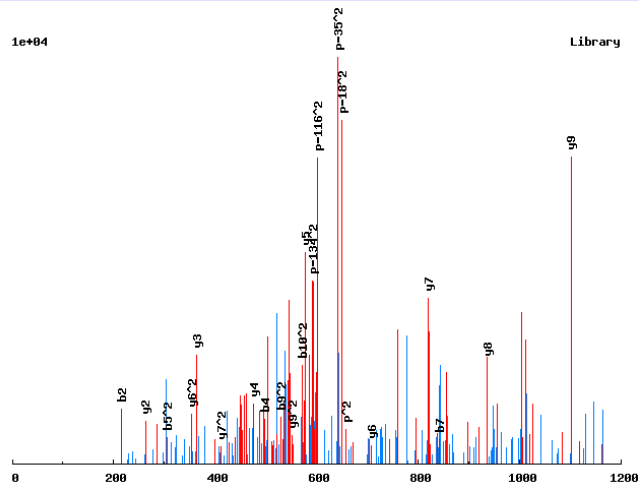

Library

|  | b <sup>1+</sup> | b <sup>2+</sup> | #  | AA     | #  | y <sup>1+</sup>  | y <sup>2+</sup> |
|--|-----------------|-----------------|----|--------|----|------------------|-----------------|
|  | 102.0550        | 51.5311         | 1  | T      | 11 |                  |                 |
|  | <b>215.1390</b> | 108.0731        | 2  | L      | 10 | 1215.5253        | 608.2663        |
|  | 382.1374        | 191.5723        | 3  | S[167] | 9  | <b>1102.4412</b> | <b>551.7243</b> |
|  | <b>497.1643</b> | 249.0858        | 4  | D      | 8  | <b>935.4429</b>  | 468.2251        |
|  | 611.2073        | <b>306.1073</b> | 5  | N      | 7  | <b>820.4159</b>  | <b>410.7116</b> |
|  | 740.2498        | 370.6286        | 6  | E      | 6  | <b>706.3730</b>  | <b>353.6901</b> |
|  | <b>841.2975</b> | 421.1524        | 7  | T      | 5  | <b>577.3304</b>  | 289.1688        |
|  | 954.3816        | 477.6944        | 8  | I      | 4  | <b>476.2827</b>  | 238.6450        |
|  | 1055.4293       | <b>528.2183</b> | 9  | T      | 3  | <b>363.1987</b>  | 182.1030        |
|  | 1142.4613       | <b>571.7343</b> | 10 | S      | 2  | <b>262.1510</b>  | 131.5791        |
|  |                 |                 | 11 | R      | 1  | 175.1190         | 88.0631         |



# Annotated spectra from Saleem et. al. 2009

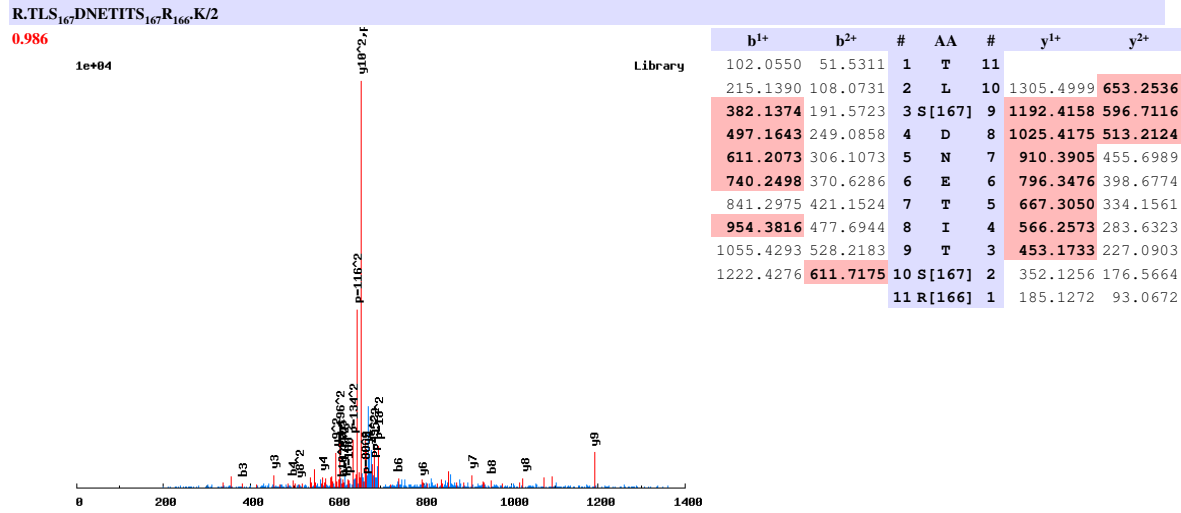

# Annotated spectra from Saleem et. al. 2009

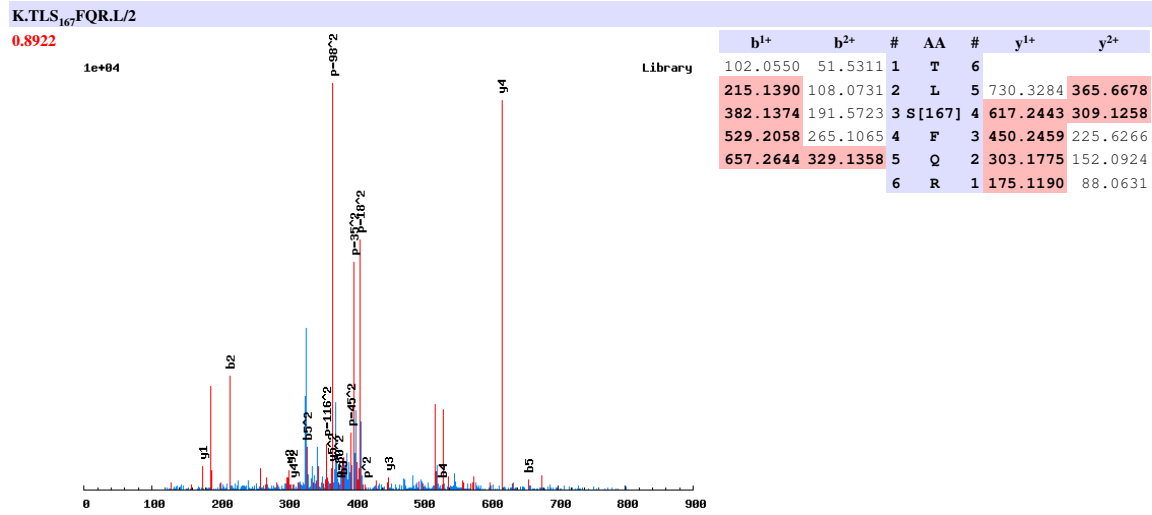

# Annotated spectra from Saleem et. al. 2009

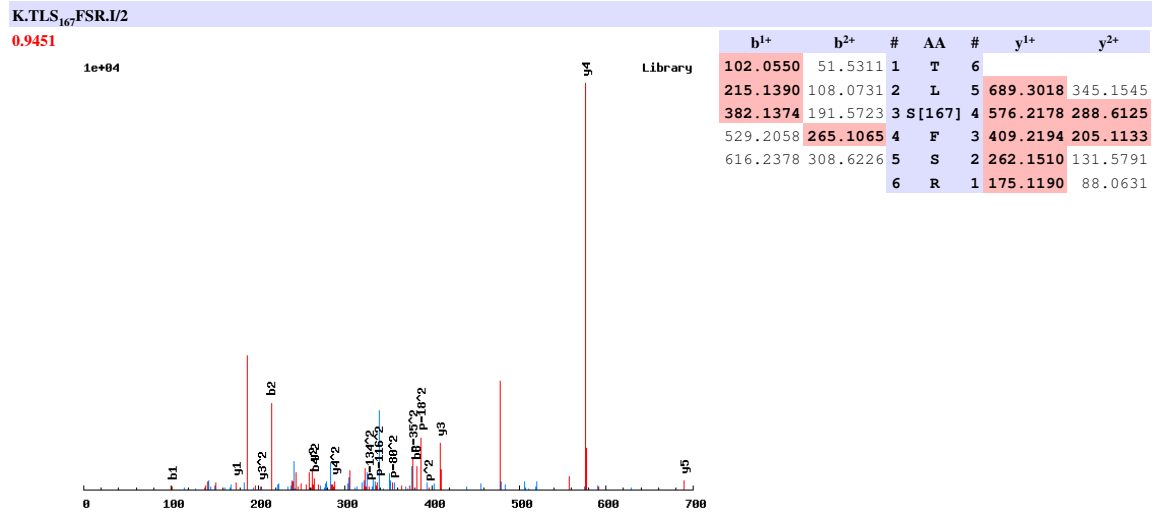

Annotated spectra from Saleem et. al. 2009

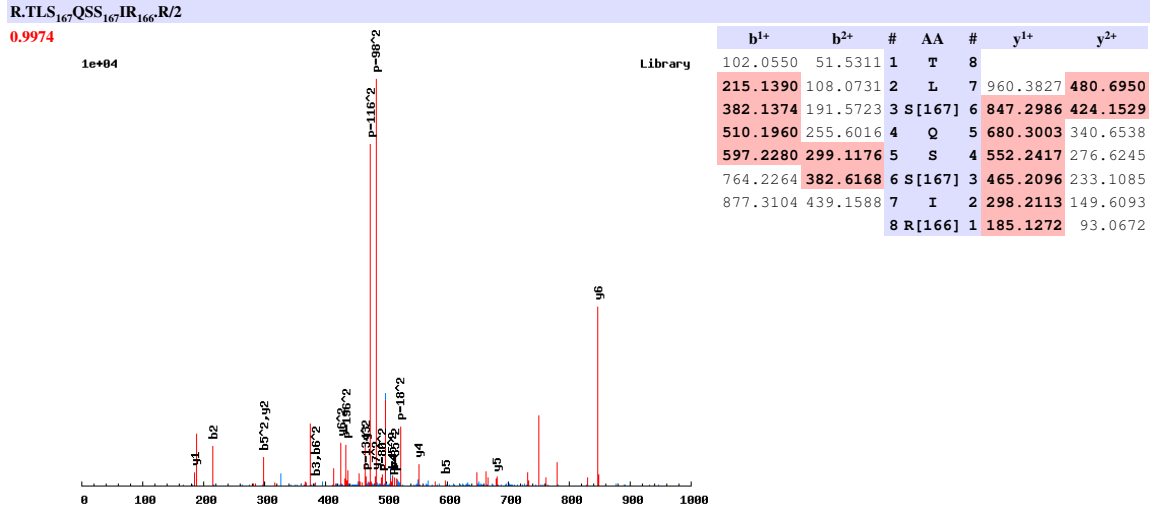

# Annotated spectra from Saleem et. al. 2009

R.TMET<sub>181</sub>DPS<sub>167</sub>T<sub>181</sub>R<sub>166</sub>EK<sub>136</sub>PGER<sub>166</sub>L/3

0.6031

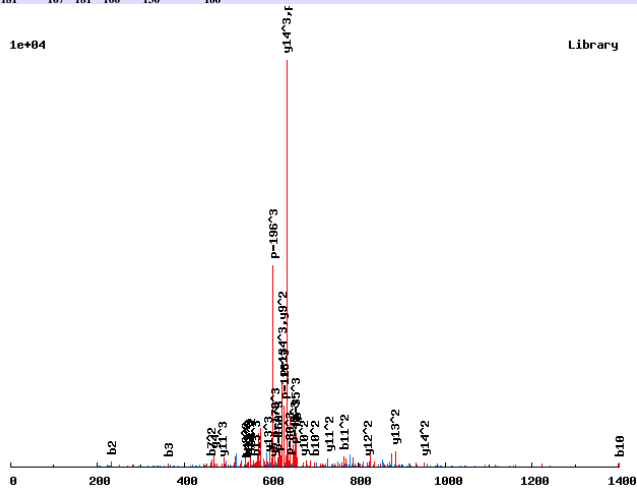

| Library | b <sup>1+</sup> | b <sup>2+</sup> | b <sup>3+</sup> | #  | AA     | #  | y <sup>1+</sup> | y <sup>2+</sup> | y <sup>3+</sup> |
|---------|-----------------|-----------------|-----------------|----|--------|----|-----------------|-----------------|-----------------|
|         | 102.0550        | 51.5311         | 34.6898         | 1  | T      | 15 |                 |                 |                 |
|         | 233.0954        | 117.0514        | 78.3700         | 2  | M      | 14 | 1900.6943       | 950.8508        | 634.2363        |
|         | 362.1380        | 181.5727        | 121.3842        | 3  | E      | 13 | 1769.6538       | 885.3306        | 590.5561        |
|         | 543.1521        | 272.0797        | 181.7222        | 4  | T[181] | 12 | 1640.6112       | 820.8093        | 547.5419        |
|         | 658.1790        | 329.5931        | 220.0645        | 5  | D      | 11 | 1459.5972       | 730.3023        | 487.2039        |
|         | 755.2318        | 378.1195        | 252.4154        | 6  | P      | 10 | 1344.5703       | 672.7888        | 448.8616        |
|         | 922.2301        | 461.6187        | 308.0816        | 7  | S[167] | 9  | 1247.5175       | 624.2624        | 416.5107        |
|         | 1103.2441       | 552.1257        | 368.4196        | 8  | T[181] | 8  | 1080.5192       | 540.7632        | 360.8446        |
|         | 1269.3535       | 635.1804        | 423.7894        | 9  | R[166] | 7  | 899.5052        | 450.2562        | 300.5066        |
|         | 1398.3961       | 699.7017        | 466.8036        | 10 | E      | 6  | 733.3958        | 367.2015        | 245.1368        |
|         | 1534.5053       | 767.7563        | 512.1733        | 11 | K[136] | 5  | 604.3532        | 302.6802        | 202.1226        |
|         | 1631.5580       | 816.2826        | 544.5242        | 12 | P      | 4  | 468.2440        | 234.6257        | 156.7529        |
|         | 1688.5795       | 844.7934        | 563.5313        | 13 | G      | 3  | 371.1913        | 186.0993        | 124.4019        |
|         | 1817.6221       | 909.3147        | 606.5455        | 14 | E      | 2  | 314.1698        | 157.5885        | 105.3948        |
|         |                 |                 |                 | 15 | R[166] | 1  | 185.1272        | 93.0672         | 62.3806         |



Annotated spectra from Saleem et. al. 2009

K.TNNC<sub>160</sub>DDNND<sub>167</sub>K<sub>136</sub>ET<sub>181</sub>VNLDVTEDDK<sub>136</sub>QK<sub>136</sub>-/3

0.9817

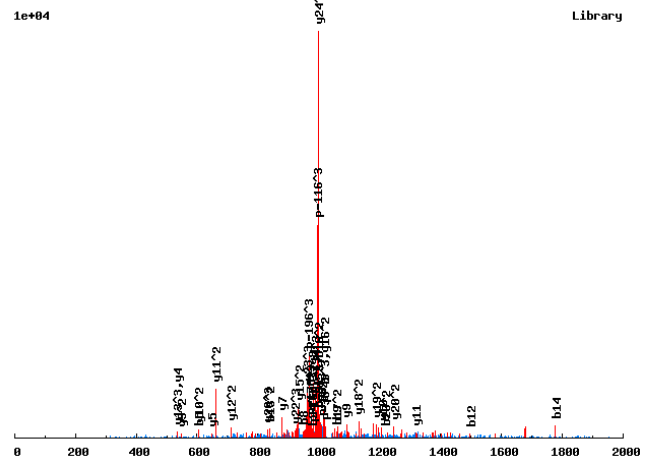

| Library | b <sup>1+</sup> | b <sup>2+</sup> | b <sup>3+</sup> | #  | AA     | #  | y <sup>1+</sup> | y <sup>2+</sup> | y <sup>3+</sup> |
|---------|-----------------|-----------------|-----------------|----|--------|----|-----------------|-----------------|-----------------|
|         | 102.0550        | 51.5311         | 34.6898         | 1  | T      | 25 |                 |                 |                 |
|         | 216.0979        | 108.5526        | 72.7042         | 2  | N      | 24 | 2994.1770       | 1497.5921       | 998.7305        |
|         | 330.1408        | 165.5740        | 110.7185        | 3  | N      | 23 | 2880.1340       | 1440.5707       | 960.7162        |
|         | 490.1715        | 245.5894        | 164.0620        | 4  | C[160] | 22 | 2766.0911       | 1383.5492       | 922.7019        |
|         | 605.1984        | 303.1028        | 202.4043        | 5  | D      | 21 | 2606.0604       | 1303.5339       | 869.3583        |
|         | 720.2254        | 360.6163        | 240.7466        | 6  | D      | 20 | 2491.0335       | 1246.0204       | 831.0160        |
|         | 834.2683        | 417.6378        | 278.7609        | 7  | N      | 19 | 2376.0066       | 1188.5069       | 792.6737        |
|         | 948.3112        | 474.6592        | 316.7753        | 8  | N      | 18 | 2261.9636       | 1131.4855       | 754.6594        |
|         | 1063.3382       | 532.1727        | 355.1176        | 9  | D      | 17 | 2147.9207       | 1074.4640       | 716.6451        |
|         | 1230.3365       | 615.6719        | 410.7837        | 10 | S[167] | 16 | 2032.8938       | 1016.9505       | 678.3028        |
|         | 1366.4457       | 683.7265        | 456.1534        | 11 | K[136] | 15 | 1865.8954       | 933.4513        | 622.6367        |
|         | 1495.4883       | 748.2478        | 499.1676        | 12 | E      | 14 | 1729.7862       | 865.3968        | 577.2669        |
|         | 1676.5023       | 838.7548        | 559.5056        | 13 | T[181] | 13 | 1600.7436       | 800.8755        | 534.2527        |
|         | 1775.5707       | 888.2890        | 592.5284        | 14 | V      | 12 | 1419.7296       | 710.3685        | 473.9147        |
|         | 1889.6136       | 945.3104        | 630.5427        | 15 | N      | 11 | 1320.6612       | 660.8343        | 440.8919        |
|         | 2002.6977       | 1001.8525       | 668.2374        | 16 | L      | 10 | 1206.6183       | 603.8128        | 402.8776        |
|         | 2117.7246       | 1059.3659       | 706.5797        | 17 | D      | 9  | 1093.5342       | 547.2708        | 365.1829        |
|         | 2216.7930       | 1108.9002       | 739.6025        | 18 | V      | 8  | 978.5073        | 489.7573        | 326.8406        |
|         | 2317.8407       | 1159.4240       | 773.2851        | 19 | T      | 7  | 879.4389        | 440.2231        | 293.8178        |
|         | 2446.8833       | 1223.9453       | 816.2993        | 20 | E      | 6  | 778.3912        | 389.6992        | 260.1353        |
|         | 2561.9102       | 1281.4588       | 854.6416        | 21 | D      | 5  | 649.3486        | 325.1779        | 217.1211        |
|         | 2676.9372       | 1338.9722       | 892.9839        | 22 | D      | 4  | 534.3217        | 267.6645        | 178.7787        |
|         | 2813.0463       | 1407.0268       | 938.3536        | 23 | K[136] | 3  | 419.2947        | 210.1510        | 140.4364        |
|         | 2941.1049       | 1471.0561       | 981.0398        | 24 | Q      | 2  | 283.1856        | 142.0964        | 95.0667         |
|         |                 |                 |                 | 25 | K[136] | 1  | 155.1270        | 78.0671         | 52.3805         |

# Annotated spectra from Saleem et. al. 2009

R.TNS<sub>167</sub>AISQS<sub>167</sub>PVNYAFPNPYK<sub>136</sub>1/2

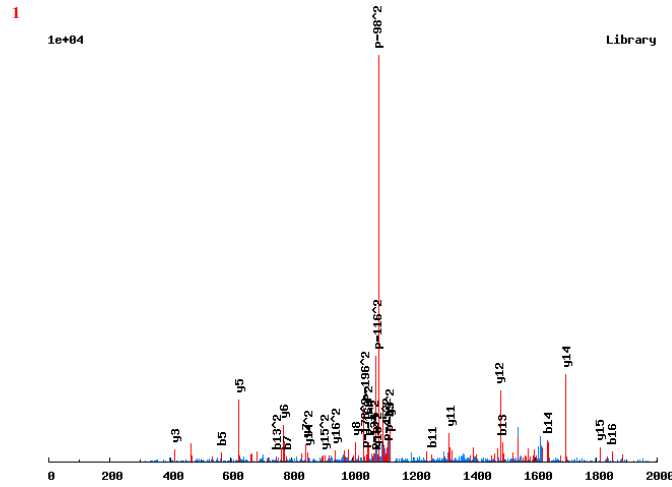

| Library | b <sup>1+</sup>  | b <sup>2+</sup> | #  | AA     | #  | y <sup>1+</sup>  | y <sup>2+</sup>  |
|---------|------------------|-----------------|----|--------|----|------------------|------------------|
|         | 102.0550         | 51.5311         | 1  | T      | 19 |                  |                  |
|         | 216.0979         | 108.5526        | 2  | N      | 18 | 2164.9232        | <b>1082.9652</b> |
|         | 383.0963         | 192.0518        | 3  | S[167] | 17 | 2050.8802        | 1025.9438        |
|         | 454.1334         | 227.5703        | 4  | A      | 16 | 1883.8819        | <b>942.4446</b>  |
|         | <b>567.2174</b>  | 284.1124        | 5  | I      | 15 | <b>1812.8448</b> | <b>906.9260</b>  |
|         | 654.2495         | 327.6284        | 6  | S      | 14 | <b>1699.7607</b> | <b>850.3840</b>  |
|         | <b>782.3080</b>  | 391.6577        | 7  | Q      | 13 | 1612.7287        | 806.8680         |
|         | 949.3064         | 475.1568        | 8  | S[167] | 12 | <b>1484.6701</b> | 742.8387         |
|         | 1046.3592        | 523.6832        | 9  | P      | 11 | <b>1317.6717</b> | 659.3395         |
|         | 1145.4276        | 573.2174        | 10 | V      | 10 | 1220.6190        | 610.8131         |
|         | <b>1259.4705</b> | 630.2389        | 11 | N      | 9  | <b>1121.5506</b> | 561.2789         |
|         | 1422.5338        | 711.7706        | 12 | Y      | 8  | <b>1007.5076</b> | 504.2575         |
|         | <b>1493.5709</b> | <b>747.2891</b> | 13 | A      | 7  | <b>844.4443</b>  | 422.7258         |
|         | <b>1640.6393</b> | 820.8233        | 14 | F      | 6  | <b>773.4072</b>  | 387.2072         |
|         | 1737.6921        | 869.3497        | 15 | P      | 5  | <b>626.3388</b>  | 313.6730         |
|         | <b>1851.7350</b> | 926.3712        | 16 | N      | 4  | 529.2860         | 265.1466         |
|         | 1948.7878        | 974.8975        | 17 | P      | 3  | <b>415.2431</b>  | 208.1252         |
|         | 2111.8511        | 1056.4292       | 18 | Y      | 2  | 318.1903         | 159.5988         |
|         |                  |                 | 19 | K[136] | 1  | 155.1270         | 78.0671          |



# Annotated spectra from Saleem et. al. 2009

R.TNS<sub>167</sub>ATLPSESSPASPDLK<sub>136</sub>LS<sub>167</sub>R<sub>166</sub>S/3

0.9992

1e+04

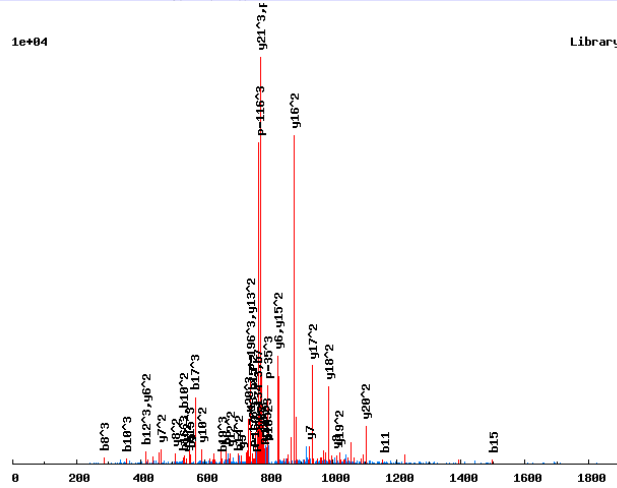

| Library | b <sup>1+</sup> | b <sup>2+</sup> | b <sup>3+</sup> | #  | AA     | #  | y <sup>1+</sup> | y <sup>2+</sup> | y <sup>3+</sup> |
|---------|-----------------|-----------------|-----------------|----|--------|----|-----------------|-----------------|-----------------|
|         | 102.0550        | 51.5311         | 34.6898         | 1  | T      | 22 |                 |                 |                 |
|         | 216.0979        | 108.5526        | 72.7042         | 2  | N      | 21 | 2322.0381       | 1161.5227       | 774.6842        |
|         | 383.0963        | 192.0518        | 128.3703        | 3  | S[167] | 20 | 2207.9951       | 1104.5012       | 736.6699        |
|         | 454.1334        | 227.5703        | 152.0493        | 4  | A      | 19 | 2040.9968       | 1021.0020       | 681.0038        |
|         | 555.1810        | 278.0942        | 185.7319        | 5  | T      | 18 | 1969.9597       | 985.4835        | 657.3247        |
|         | 668.2651        | 334.6362        | 223.4266        | 6  | L      | 17 | 1868.9120       | 934.9596        | 623.6422        |
|         | 765.3179        | 383.1626        | 255.7775        | 7  | P      | 16 | 1755.8279       | 878.4176        | 585.9475        |
|         | 852.3499        | 426.6786        | 284.7882        | 8  | S      | 15 | 1658.7752       | 829.8912        | 553.5966        |
|         | 939.3819        | 470.1946        | 313.7988        | 9  | S      | 14 | 1571.7431       | 786.3752        | 524.5859        |
|         | 1068.4245       | 534.7159        | 356.8130        | 10 | E      | 13 | 1484.7111       | 742.8592        | 495.5752        |
|         | 1155.4565       | 578.2319        | 385.8237        | 11 | S      | 12 | 1355.6685       | 678.3379        | 452.5610        |
|         | 1242.4886       | 621.7479        | 414.8344        | 12 | S      | 11 | 1268.6365       | 634.8219        | 423.5503        |
|         | 1339.5413       | 670.2743        | 447.1853        | 13 | P      | 10 | 1181.6045       | 591.3059        | 394.5397        |
|         | 1410.5784       | 705.7929        | 470.8643        | 14 | A      | 9  | 1084.5517       | 542.7795        | 362.1888        |
|         | 1497.6105       | 749.3089        | 499.8750        | 15 | S      | 8  | 1013.5146       | 507.2609        | 338.5097        |
|         | 1594.6632       | 797.8353        | 532.2259        | 16 | P      | 7  | 926.4826        | 463.7449        | 309.4990        |
|         | 1709.6902       | 855.3487        | 570.5682        | 17 | D      | 6  | 829.4298        | 415.2185        | 277.1481        |
|         | 1822.7742       | 911.8908        | 608.2629        | 18 | L      | 5  | 714.4029        | 357.7051        | 238.8058        |
|         | 1958.8834       | 979.9453        | 653.6327        | 19 | K[136] | 4  | 601.3188        | 301.1630        | 201.1111        |
|         | 2071.9674       | 1036.4874       | 691.3273        | 20 | L      | 3  | 465.2096        | 233.1085        | 155.7414        |
|         | 2238.9658       | 1119.9865       | 746.9935        | 21 | S[167] | 2  | 352.1256        | 176.5664        | 118.0467        |
|         |                 |                 |                 | 22 | R[166] | 1  | 185.1272        | 93.0672         | 62.3806         |

# Annotated spectra from Saleem et. al. 2009

R.T.<sub>181</sub>NSFVGTEEYLAP<sub>166</sub>G/2

0.9973

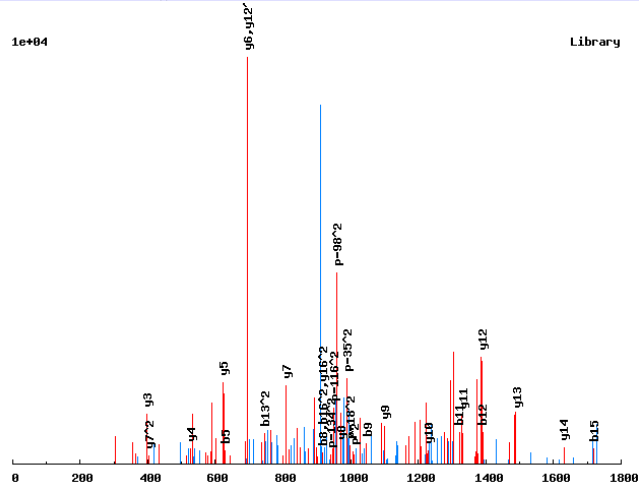

| Library | b <sup>1+</sup> | b <sup>2+</sup> | #  | AA | #     | y <sup>1+</sup> | y <sup>2+</sup>  |
|---------|-----------------|-----------------|----|----|-------|-----------------|------------------|
|         | 182.0213        | 91.5143         | 1  | T  | [181] | 17              |                  |
|         | 296.0642        | 148.5358        | 2  | N  | 16    | 1833.9256       | 917.4665         |
|         | 383.0963        | 192.0518        | 3  | S  | 15    | 1719.8827       | 860.4450         |
|         | 530.1647        | 265.5860        | 4  | F  | 14    | 1632.8507       | 816.9290         |
|         | 629.2331        | 315.1202        | 5  | V  | 13    | 1485.7823       | 743.3948         |
|         | 686.2545        | 343.6309        | 6  | G  | 12    | 1386.7139       | 693.8606         |
|         | 787.3022        | 394.1547        | 7  | T  | 11    | 1329.6924       | 665.3498         |
|         | 916.3448        | 458.6760        | 8  | E  | 10    | 1228.6447       | 614.8260         |
|         | 1045.3874       | 523.1973        | 9  | E  | 9     | 1099.6021       | 550.3047         |
|         | 1208.4507       | 604.7290        | 10 | Y  | 8     | 970.5595        | 485.7834         |
|         | 1321.5348       | 661.2710        | 11 | L  | 7     | 807.4962        | 404.2517         |
|         | 1392.5719       | 696.7896        | 12 | A  | 6     | 694.4121        | 347.7097         |
|         | 1489.6247       | 745.3160        | 13 | P  | 5     | 623.3750        | 312.1912         |
|         | 1618.6672       | 809.8373        | 14 | E  | 4     | 526.3223        | 263.6648         |
|         | 1717.7357       | 859.3715        | 15 | V  | 3     | 397.2797        | 199.1435         |
|         | 1830.8197       | 915.9135        | 16 | I  | 2     | 298.2113        | 149.6093         |
|         |                 |                 | 17 | R  | [166] | 1               | 185.1272 93.0672 |

# Annotated spectra from Saleem et. al. 2009

R.TNS<sub>167</sub>GC<sub>160</sub>S<sub>167</sub>ITSGASMIATK<sub>136</sub>D/2

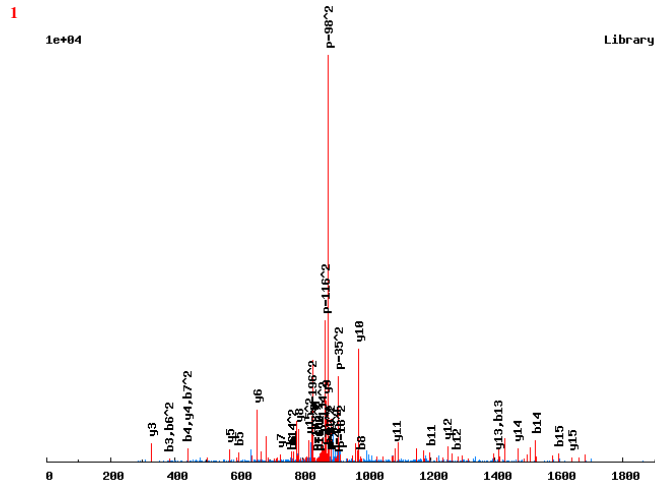

| b <sup>1+</sup> | b <sup>2+</sup> | #  | AA     | #  | y <sup>1+</sup> | y <sup>2+</sup> |
|-----------------|-----------------|----|--------|----|-----------------|-----------------|
| 102.0550        | 51.5311         | 1  | T      | 17 |                 |                 |
| 216.0979        | 108.5526        | 2  | N      | 16 | 1752.6825       | 876.8449        |
| 383.0963        | 192.0518        | 3  | S[167] | 15 | 1638.6395       | 819.8234        |
| 440.1177        | 220.5625        | 4  | G      | 14 | 1471.6412       | 736.3242        |
| 600.1484        | 300.5778        | 5  | C[160] | 13 | 1414.6197       | 707.8135        |
| 767.1467        | 384.0770        | 6  | S[167] | 12 | 1254.5891       | 627.7982        |
| 880.2308        | 440.6190        | 7  | I      | 11 | 1087.5907       | 544.2990        |
| 981.2785        | 491.1429        | 8  | T      | 10 | 974.5066        | 487.7570        |
| 1068.3105       | 534.6589        | 9  | S      | 9  | 873.4590        | 437.2331        |
| 1125.3320       | 563.1696        | 10 | G      | 8  | 786.4269        | 393.7171        |
| 1196.3691       | 598.6882        | 11 | A      | 7  | 729.4055        | 365.2064        |
| 1283.4011       | 642.2042        | 12 | S      | 6  | 658.3684        | 329.6878        |
| 1414.4416       | 707.7244        | 13 | M      | 5  | 571.3363        | 286.1718        |
| 1527.5256       | 764.2665        | 14 | I      | 4  | 440.2958        | 220.6516        |
| 1598.5628       | 799.7850        | 15 | A      | 3  | 327.2118        | 164.1095        |
| 1699.6104       | 850.3089        | 16 | T      | 2  | 256.1747        | 128.5910        |
|                 |                 | 17 | K[136] | 1  | 155.1270        | 78.0671         |

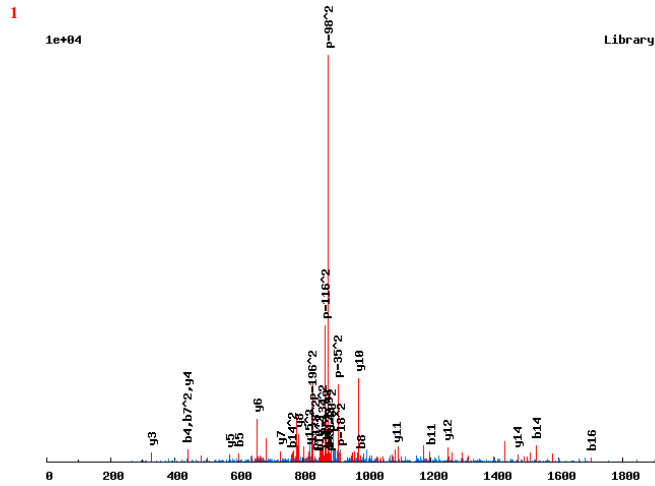

| b <sup>1+</sup> | b <sup>2+</sup> | #  | AA     | #  | y <sup>1+</sup> | y <sup>2+</sup> |
|-----------------|-----------------|----|--------|----|-----------------|-----------------|
| 102.0550        | 51.5311         | 1  | T      | 17 |                 |                 |
| 216.0979        | 108.5526        | 2  | N      | 16 | 1752.6825       | 876.8449        |
| 383.0963        | 192.0518        | 3  | S[167] | 15 | 1638.6395       | 819.8234        |
| 440.1177        | 220.5625        | 4  | G      | 14 | 1471.6412       | 736.3242        |
| 600.1484        | 300.5778        | 5  | C[160] | 13 | 1414.6197       | 707.8135        |
| 767.1467        | 384.0770        | 6  | S[167] | 12 | 1254.5891       | 627.7982        |
| 880.2308        | 440.6190        | 7  | I      | 11 | 1087.5907       | 544.2990        |
| 981.2785        | 491.1429        | 8  | T      | 10 | 974.5066        | 487.7570        |
| 1068.3105       | 534.6589        | 9  | S      | 9  | 873.4590        | 437.2331        |
| 1125.3320       | 563.1696        | 10 | G      | 8  | 786.4269        | 393.7171        |
| 1196.3691       | 598.6882        | 11 | A      | 7  | 729.4055        | 365.2064        |
| 1283.4011       | 642.2042        | 12 | S      | 6  | 658.3684        | 329.6878        |
| 1414.4416       | 707.7244        | 13 | M      | 5  | 571.3363        | 286.1718        |
| 1527.5256       | 764.2665        | 14 | I      | 4  | 440.2958        | 220.6516        |
| 1598.5628       | 799.7850        | 15 | A      | 3  | 327.2118        | 164.1095        |
| 1699.6104       | 850.3089        | 16 | T      | 2  | 256.1747        | 128.5910        |
|                 |                 | 17 | K[136] | 1  | 155.1270        | 78.0671         |

# Annotated spectra from Saleem et. al. 2009

K.TNS<sub>167</sub>LES<sub>167</sub>EHLK.I/2

0.9384

1e+04

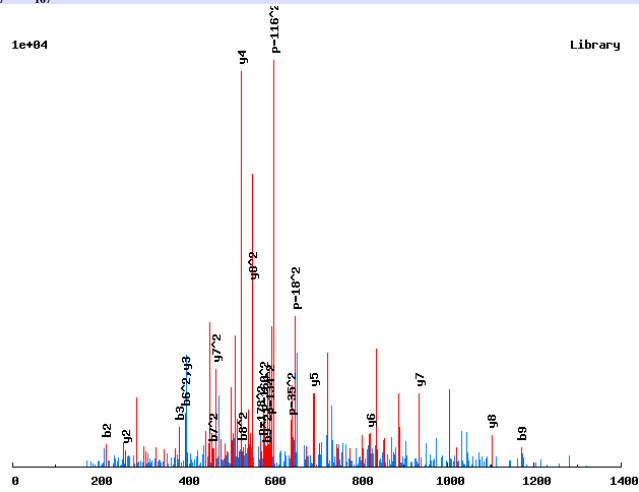

| Library | b <sup>1+</sup> | b <sup>2+</sup> | #  | AA     | #  | y <sup>1+</sup> | y <sup>2+</sup> |
|---------|-----------------|-----------------|----|--------|----|-----------------|-----------------|
|         | 102.0550        | 51.5311         | 1  | T      | 10 |                 |                 |
|         | 216.0979        | 108.5526        | 2  | N      | 9  | 1216.4647       | 608.7360        |
|         | 383.0963        | 192.0518        | 3  | S[167] | 8  | 1102.4217       | 551.7145        |
|         | 496.1803        | 248.5938        | 4  | L      | 7  | 935.4234        | 468.2153        |
|         | 625.2229        | 313.1151        | 5  | E      | 6  | 822.3393        | 411.6733        |
|         | 792.2213        | 396.6143        | 6  | S[167] | 5  | 693.2967        | 347.1520        |
|         | 921.2639        | 461.1356        | 7  | E      | 4  | 526.2984        | 263.6528        |
|         | 1058.3228       | 529.6650        | 8  | H      | 3  | 397.2558        | 199.1315        |
|         | 1171.4068       | 586.2071        | 9  | L      | 2  | 260.1969        | 130.6021        |
|         |                 |                 | 10 | K      | 1  | 147.1128        | 74.0600         |

# Annotated spectra from Saleem et. al. 2009

R.TNS<sub>167</sub>-LFTSS<sub>167</sub>-PMK.T/2

0.9986

1e+04

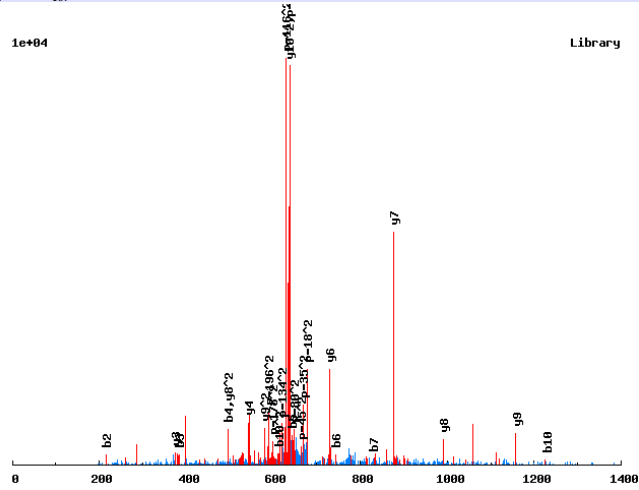

| Library | b <sup>1+</sup> | b <sup>2+</sup> | #  | AA     | #  | y <sup>1+</sup> | y <sup>2+</sup> |
|---------|-----------------|-----------------|----|--------|----|-----------------|-----------------|
|         | 102.0550        | 51.5311         | 1  | T      | 11 |                 |                 |
|         | 216.0979        | 108.5526        | 2  | N      | 10 | 1271.4779       | 636.2426        |
|         | 383.0963        | 192.0518        | 3  | S[167] | 9  | 1157.4350       | 579.2211        |
|         | 496.1803        | 248.5938        | 4  | L      | 8  | 990.4366        | 495.7219        |
|         | 643.2487        | 322.1280        | 5  | F      | 7  | 877.3525        | 439.1799        |
|         | 744.2964        | 372.6518        | 6  | T      | 6  | 730.2841        | 365.6457        |
|         | 831.3284        | 416.1679        | 7  | S      | 5  | 629.2364        | 315.1219        |
|         | 998.3268        | 499.6670        | 8  | S[167] | 4  | 542.2044        | 271.6058        |
|         | 1095.3796       | 548.1934        | 9  | P      | 3  | 375.2061        | 188.1067        |
|         | 1226.4200       | 613.7137        | 10 | M      | 2  | 278.1533        | 139.5803        |
|         |                 |                 | 11 | K      | 1  | 147.1128        | 74.0600         |

# Annotated spectra from Saleem et. al. 2009

K.TNT<sub>181</sub>GS<sub>167</sub>DENVASASGGVR<sub>166</sub>L/2

0.9204

1e+04

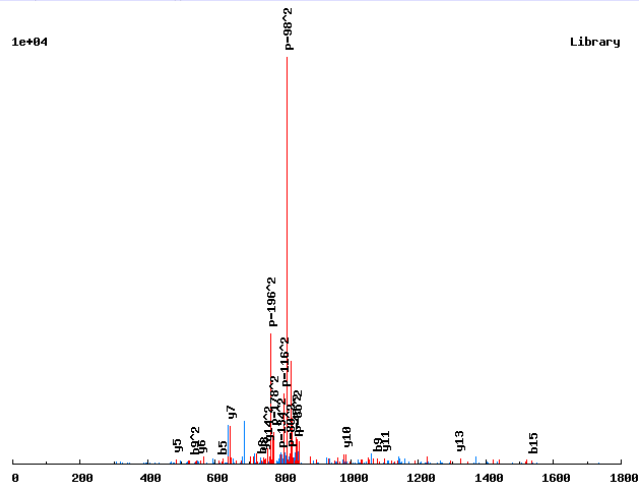

| Library | b <sup>1+</sup> | b <sup>2+</sup> | #  | AA     | #  | y <sup>1+</sup> | y <sup>2+</sup> |
|---------|-----------------|-----------------|----|--------|----|-----------------|-----------------|
|         | 102.0550        | 51.5311         | 1  | T      | 16 |                 |                 |
|         | 216.0979        | 108.5526        | 2  | N      | 15 | 1619.5974       | 810.3023        |
|         | 397.1119        | 199.0596        | 3  | T[181] | 14 | 1505.5544       | 753.2809        |
|         | 454.1334        | 227.5703        | 4  | G      | 13 | 1324.5404       | 662.7738        |
|         | 621.1317        | 311.0695        | 5  | S[167] | 12 | 1267.5189       | 634.2631        |
|         | 736.1587        | 368.5830        | 6  | D      | 11 | 1100.5206       | 550.7639        |
|         | 865.2013        | 433.1043        | 7  | E      | 10 | 985.4936        | 493.2505        |
|         | 979.2442        | 490.1257        | 8  | N      | 9  | 856.4511        | 428.7292        |
|         | 1078.3126       | 539.6599        | 9  | V      | 8  | 742.4081        | 371.7077        |
|         | 1165.3446       | 583.1760        | 10 | S      | 7  | 643.3397        | 322.1735        |
|         | 1236.3817       | 618.6945        | 11 | A      | 6  | 556.3077        | 278.6575        |
|         | 1323.4138       | 662.2105        | 12 | S      | 5  | 485.2706        | 243.1389        |
|         | 1380.4352       | 690.7213        | 13 | G      | 4  | 398.2385        | 199.6229        |
|         | 1437.4567       | 719.2320        | 14 | G      | 3  | 341.2171        | 171.1122        |
|         | 1536.5251       | 768.7662        | 15 | V      | 2  | 284.1956        | 142.6015        |
|         |                 |                 | 16 | R[166] | 1  | 185.1272        | 93.0672         |

# Annotated spectra from Saleem et. al. 2009

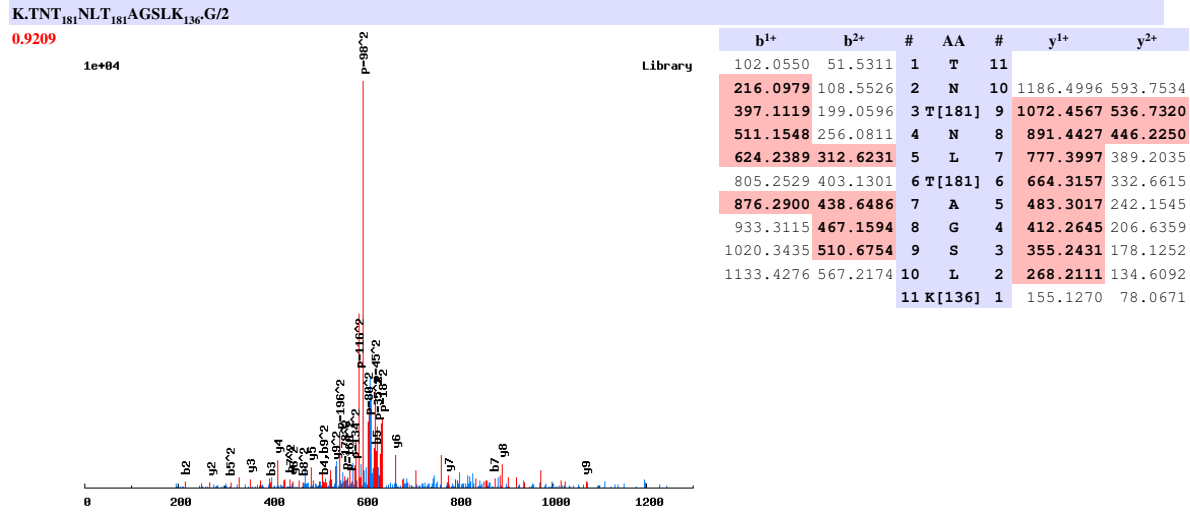

# Annotated spectra from Saleem et. al. 2009

K.T<sub>181</sub>NTNLT<sub>181</sub>AGS<sub>167</sub>LK<sub>136</sub>GR<sub>166</sub>F/2

0.816

1e+04

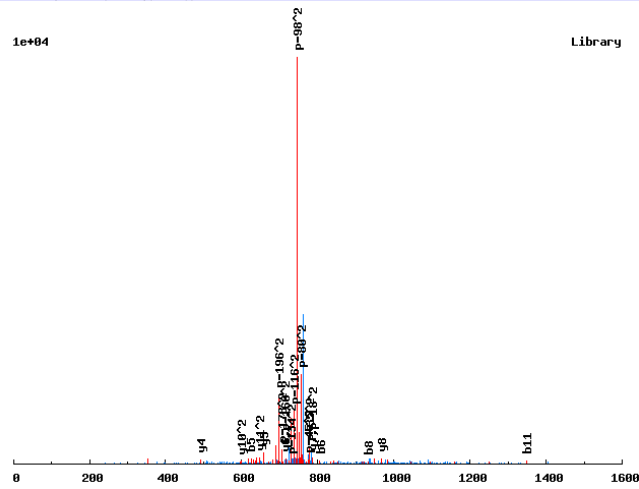

| Library | b <sup>1+</sup> | b <sup>2+</sup> | #  | AA | #     | y <sup>1+</sup> | y <sup>2+</sup> |          |
|---------|-----------------|-----------------|----|----|-------|-----------------|-----------------|----------|
|         | 182.0213        | 91.5143         | 1  | T  | [181] | 13              |                 |          |
|         | 296.0642        | 148.5358        | 2  | N  | 12    | 1409.6304       | 705.3189        |          |
|         | 397.1119        | 199.0596        | 3  | T  | 11    | 1295.5875       | 648.2974        |          |
|         | 511.1548        | 256.0811        | 4  | N  | 10    | 1194.5398       | 597.7736        |          |
|         | 624.2389        | 312.6231        | 5  | L  | 9     | 1080.4969       | 540.7521        |          |
|         | 805.2529        | 403.1301        | 6  | T  | [181] | 8               | 967.4128        | 484.2101 |
|         | 876.2900        | 438.6486        | 7  | A  | 7     | 786.3988        | 393.7031        |          |
|         | 933.3115        | 467.1594        | 8  | G  | 6     | 715.3617        | 358.1845        |          |
|         | 1100.3098       | 550.6586        | 9  | S  | [167] | 5               | 658.3403        | 329.6738 |
|         | 1213.3939       | 607.2006        | 10 | L  | 4     | 491.3419        | 246.1746        |          |
|         | 1349.5031       | 675.2552        | 11 | K  | [136] | 3               | 378.2578        | 189.6326 |
|         | 1406.5245       | 703.7659        | 12 | G  | 2     | 242.1487        | 121.5780        |          |
|         |                 |                 | 13 | R  | [166] | 1               | 185.1272        | 93.0672  |



# Annotated spectra from Saleem et. al. 2009

R.T.<sub>181</sub>PART<sub>181</sub>PTPTPPVVAEPAIS<sub>167</sub>PRPVSQR.T/4

0.9576

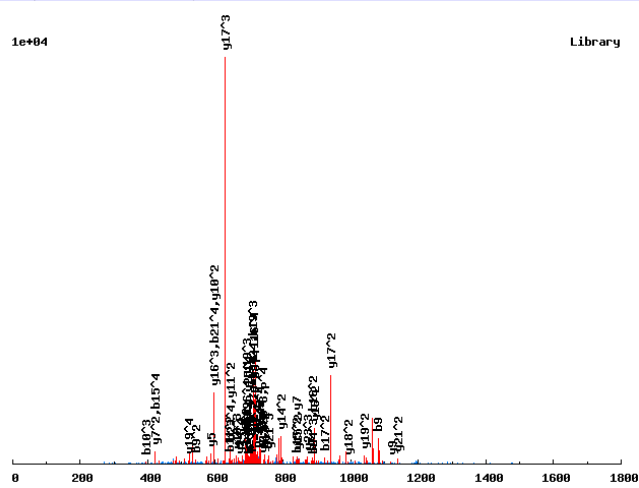

| Library | b <sup>1+</sup> | b <sup>2+</sup> | b <sup>3+</sup> | b <sup>4+</sup> | #  | AA | #  | y <sup>1+</sup> | y <sup>2+</sup> | y <sup>3+</sup> | y <sup>4+</sup> |
|---------|-----------------|-----------------|-----------------|-----------------|----|----|----|-----------------|-----------------|-----------------|-----------------|
|         | 182.0213        | 91.5143         | 61.3453         | 46.2608         | 1  | T  | 26 |                 |                 |                 |                 |
|         | 279.0741        | 140.0407        | 93.6962         | 70.5240         | 2  | P  | 25 | 2781.3848       | 1391.1960       | 927.7998        | 696.1017        |
|         | 350.1112        | 175.5592        | 117.3752        | 88.2833         | 3  | A  | 24 | 2684.3320       | 1342.6697       | 895.4489        | 671.8385        |
|         | 506.2123        | 253.6098        | 169.4089        | 127.3085        | 4  | R  | 23 | 2613.2949       | 1307.1511       | 871.7698        | 654.0792        |
|         | 687.2263        | 344.1168        | 229.7469        | 172.5620        | 5  | T  | 22 | 2457.1938       | 1229.1006       | 819.7361        | 615.0539        |
|         | 784.2790        | 392.6432        | 262.0979        | 196.8252        | 6  | P  | 21 | 2276.1798       | 1138.5935       | 759.3981        | 569.8004        |
|         | 885.3267        | 443.1670        | 295.7804        | 222.0871        | 7  | T  | 20 | 2179.1271       | 1090.0672       | 727.0472        | 545.5372        |
|         | 982.3795        | 491.6934        | 328.1313        | 246.3503        | 8  | P  | 19 | 2078.0794       | 1039.5433       | 693.3646        | 520.2753        |
|         | 1083.4272       | 542.2172        | 361.8139        | 271.6123        | 9  | T  | 18 | 1981.0266       | 991.0169        | 661.0137        | 496.0121        |
|         | 1180.4799       | 590.7436        | 394.1648        | 295.8754        | 10 | P  | 17 | 1879.9789       | 940.4931        | 627.3312        | 470.7502        |
|         | 1277.5327       | 639.2700        | 426.5157        | 320.1386        | 11 | P  | 16 | 1782.9262       | 891.9667        | 594.9802        | 446.4870        |
|         | 1376.6011       | 688.8042        | 459.5386        | 344.9057        | 12 | V  | 15 | 1685.8734       | 843.4403        | 562.6293        | 422.2238        |
|         | 1475.6695       | 738.3384        | 492.5614        | 369.6728        | 13 | V  | 14 | 1586.8050       | 793.9061        | 529.6065        | 397.4567        |
|         | 1546.7066       | 773.8569        | 516.2404        | 387.4321        | 14 | A  | 13 | 1487.7366       | 744.3719        | 496.5837        | 372.6896        |
|         | 1675.7492       | 838.3782        | 559.2546        | 419.6928        | 15 | E  | 12 | 1416.6995       | 708.8534        | 472.9047        | 354.9303        |
|         | 1772.8020       | 886.9046        | 591.6055        | 443.9560        | 16 | P  | 11 | 1287.6569       | 644.3321        | 429.8905        | 322.6697        |
|         | 1843.8391       | 922.4232        | 615.2845        | 461.7152        | 17 | A  | 10 | 1190.6041       | 595.8057        | 397.5396        | 298.4065        |
|         | 1956.9231       | 978.9652        | 652.9792        | 489.9862        | 18 | I  | 9  | 1119.5670       | 560.2872        | 373.8605        | 280.6472        |
|         | 2123.9215       | 1062.4644       | 708.6454        | 531.7358        | 19 | S  | 8  | 1006.4830       | 503.7451        | 336.1658        | 252.3762        |
|         | 2220.9743       | 1110.9908       | 740.9963        | 555.9990        | 20 | P  | 7  | 839.4846        | 420.2459        | 280.4997        | 210.6266        |
|         | 2377.0754       | 1189.0413       | 793.0300        | 595.0243        | 21 | R  | 6  | 742.4318        | 371.7196        | 248.1488        | 186.3634        |
|         | 2474.1281       | 1237.5677       | 825.3809        | 619.2875        | 22 | P  | 5  | 586.3307        | 293.6690        | 196.1151        | 147.3381        |
|         | 2573.1965       | 1287.1019       | 858.4037        | 644.0546        | 23 | V  | 4  | 489.2780        | 245.1426        | 163.7642        | 123.0750        |
|         | 2660.2286       | 1330.6179       | 887.4144        | 665.8126        | 24 | S  | 3  | 390.2096        | 195.6084        | 130.7414        | 98.3078         |
|         | 2788.2871       | 1394.6472       | 930.1006        | 697.8272        | 25 | Q  | 2  | 303.1775        | 152.0924        | 101.7307        | 76.5498         |
|         |                 |                 |                 |                 | 26 | R  | 1  | 175.1190        | 88.0631         | 59.0445         | 44.5352         |

# Annotated spectra from Saleem et. al. 2009

R.TPEQHPNDDNS<sub>167</sub>SLAAS<sub>167</sub>HK.G/3

0.9365

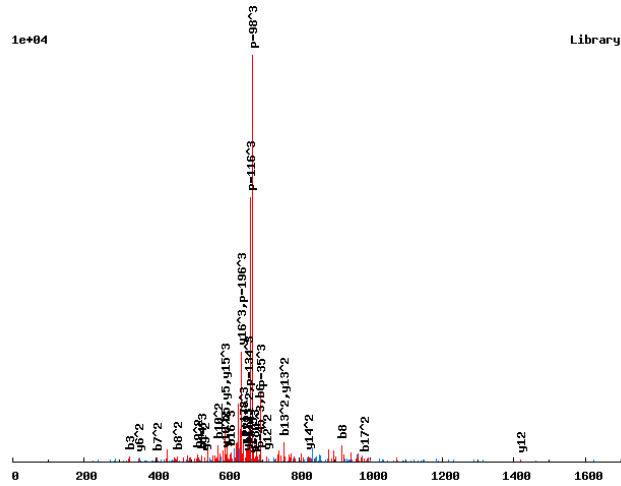

| Library | b <sup>1+</sup> | b <sup>2+</sup> | b <sup>3+</sup> | #  | AA     | #  | y <sup>1+</sup> | y <sup>2+</sup> | y <sup>3+</sup> |
|---------|-----------------|-----------------|-----------------|----|--------|----|-----------------|-----------------|-----------------|
|         | 102.0550        | 51.5311         | 34.6898         | 1  | T      | 18 |                 |                 |                 |
|         | 199.1077        | 100.0575        | 67.0408         | 2  | P      | 17 | 2006.7641       | 1003.8857       | 669.5929        |
|         | 328.1503        | 164.5788        | 110.0550        | 3  | E      | 16 | 1909.7113       | 955.3593        | 637.2420        |
|         | 456.2089        | 228.6081        | 152.7411        | 4  | Q      | 15 | 1780.6687       | 890.8380        | 594.2278        |
|         | 593.2678        | 297.1375        | 198.4275        | 5  | H      | 14 | 1652.6102       | 826.8087        | 551.5416        |
|         | 690.3206        | 345.6639        | 230.7784        | 6  | P      | 13 | 1515.5512       | 758.2793        | 505.8553        |
|         | 804.3635        | 402.6854        | 268.7927        | 7  | N      | 12 | 1418.4985       | 709.7529        | 473.5043        |
|         | 919.3904        | 460.1989        | 307.1350        | 8  | D      | 11 | 1304.4556       | 652.7314        | 435.4900        |
|         | 1034.4174       | 517.7123        | 345.4773        | 9  | D      | 10 | 1189.4286       | 595.2179        | 397.1477        |
|         | 1148.4603       | 574.7338        | 383.4916        | 10 | N      | 9  | 1074.4017       | 537.7045        | 358.8054        |
|         | 1315.4587       | 658.2330        | 439.1577        | 11 | S[167] | 8  | 960.3587        | 480.6830        | 320.7911        |
|         | 1402.4907       | 701.7490        | 468.1684        | 12 | S      | 7  | 793.3604        | 397.1838        | 265.1250        |
|         | 1515.5748       | 758.2910        | 505.8631        | 13 | L      | 6  | 706.3284        | 353.6678        | 236.1143        |
|         | 1586.6119       | 793.8096        | 529.5421        | 14 | A      | 5  | 593.2443        | 297.1258        | 198.4196        |
|         | 1657.6490       | 829.3281        | 553.2212        | 15 | A      | 4  | 522.2072        | 261.6072        | 174.7406        |
|         | 1824.6473       | 912.8273        | 608.8873        | 16 | S[167] | 3  | 451.1701        | 226.0887        | 151.0615        |
|         | 1961.7062       | 981.3568        | 654.5736        | 17 | H      | 2  | 284.1717        | 142.5895        | 95.3954         |
|         |                 |                 |                 | 18 | K      | 1  | 147.1128        | 74.0600         | 49.7091         |

# Annotated spectra from Saleem et. al. 2009

R.TPEQHPNDDNS<sub>167</sub>S<sub>167</sub>LAAS<sub>167</sub>HKGFQK.L/3

0.9988

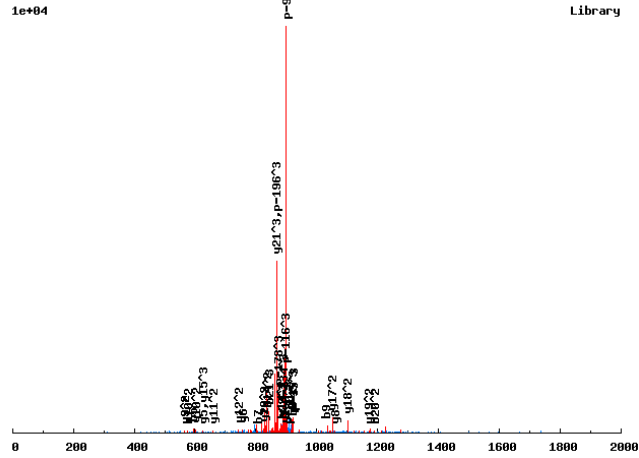

| Library | b <sup>1+</sup> | b <sup>2+</sup> | b <sup>3+</sup> | #  | AA     | #  | y <sup>1+</sup> | y <sup>2+</sup> | y <sup>3+</sup> |
|---------|-----------------|-----------------|-----------------|----|--------|----|-----------------|-----------------|-----------------|
|         | 102.0550        | 51.5311         | 34.6898         | 1  | T      | 23 |                 |                 |                 |
|         | 199.1077        | 100.0575        | 67.0408         | 2  | P      | 22 | 2694.0422       | 1347.5248       | 898.6856        |
|         | 328.1503        | 164.5788        | 110.0550        | 3  | E      | 21 | 2596.9895       | 1298.9984       | 866.3347        |
|         | 456.2089        | 228.6081        | 152.7411        | 4  | Q      | 20 | 2467.9469       | 1234.4771       | 823.3205        |
|         | 593.2678        | 297.1375        | 198.4275        | 5  | H      | 19 | 2339.8883       | 1170.4478       | 780.6343        |
|         | 690.3206        | 345.6639        | 230.7784        | 6  | P      | 18 | 2202.8294       | 1101.9183       | 734.9480        |
|         | 804.3635        | 402.6854        | 268.7927        | 7  | N      | 17 | 2105.7766       | 1053.3920       | 702.5971        |
|         | 919.3904        | 460.1989        | 307.1350        | 8  | D      | 16 | 1991.7337       | 996.3705        | 664.5828        |
|         | 1034.4174       | 517.7123        | 345.4773        | 9  | D      | 15 | 1876.7068       | 938.8570        | 626.2404        |
|         | 1148.4603       | 574.7338        | 383.4916        | 10 | N      | 14 | 1761.6798       | 881.3436        | 587.8981        |
|         | 1315.4587       | 658.2330        | 439.1577        | 11 | S[167] | 13 | 1647.6369       | 824.3221        | 549.8838        |
|         | 1482.4570       | 741.7322        | 494.8239        | 12 | S[167] | 12 | 1480.6385       | 740.8229        | 494.2177        |
|         | 1595.5411       | 798.2742        | 532.5185        | 13 | L      | 11 | 1313.6402       | 657.3237        | 438.5516        |
|         | 1666.5782       | 833.7927        | 556.1976        | 14 | A      | 10 | 1200.5561       | 600.7817        | 400.8569        |
|         | 1737.6153       | 869.3113        | 579.8766        | 15 | A      | 9  | 1129.5190       | 565.2631        | 377.1779        |
|         | 1904.6137       | 952.8105        | 635.5427        | 16 | S[167] | 8  | 1058.4819       | 529.7446        | 353.4988        |
|         | 2041.6726       | 1021.3399       | 681.2290        | 17 | H      | 7  | 891.4835        | 446.2454        | 297.8327        |
|         | 2169.7675       | 1085.3874       | 723.9274        | 18 | K      | 6  | 754.4246        | 377.7160        | 252.1464        |
|         | 2226.7890       | 1113.8981       | 742.9345        | 19 | G      | 5  | 626.3297        | 313.6685        | 209.4481        |
|         | 2373.8574       | 1187.4323       | 791.9573        | 20 | F      | 4  | 569.3082        | 285.1577        | 190.4409        |
|         | 2520.9258       | 1260.9665       | 840.9801        | 21 | F      | 3  | 422.2398        | 211.6235        | 141.4181        |
|         | 2648.9844       | 1324.9958       | 883.6663        | 22 | Q      | 2  | 275.1714        | 138.0893        | 92.3953         |
|         |                 |                 |                 | 23 | K      | 1  | 147.1128        | 74.0600         | 49.7091         |

# Annotated spectra from Saleem et. al. 2009

K.TPNAVYR<sub>166</sub>EENS<sub>167</sub>PIQSPVQPILSS<sub>167</sub>PK<sub>136</sub>L/3

0.9182

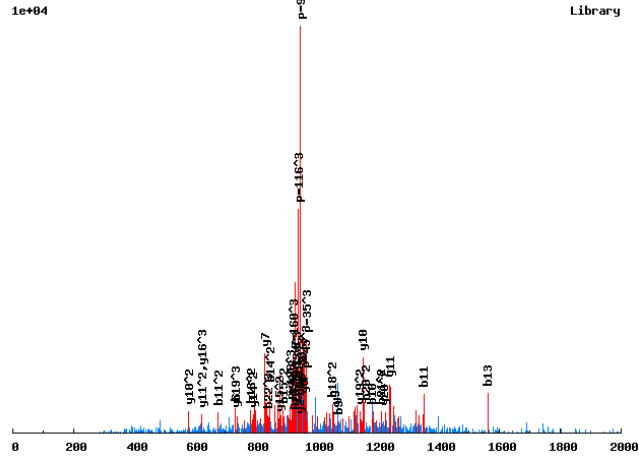

| Library | b <sup>1+</sup> | b <sup>2+</sup> | b <sup>3+</sup> | #  | AA     | #  | y <sup>1+</sup> | y <sup>2+</sup> | y <sup>3+</sup> |
|---------|-----------------|-----------------|-----------------|----|--------|----|-----------------|-----------------|-----------------|
|         | 102.0550        | 51.5311         | 34.6898         | 1  | T      | 25 |                 |                 |                 |
|         | 199.1077        | 100.0575        | 67.0408         | 2  | P      | 24 | 2828.3386       | 1414.6729       | 943.4511        |
|         | 313.1506        | 157.0790        | 105.0551        | 3  | N      | 23 | 2731.2858       | 1366.1466       | 911.1001        |
|         | 384.1878        | 192.5975        | 128.7341        | 4  | A      | 22 | 2617.2429       | 1309.1251       | 873.0858        |
|         | 483.2562        | 242.1317        | 161.7569        | 5  | V      | 21 | 2546.2058       | 1273.6065       | 849.4068        |
|         | 646.3195        | 323.6634        | 216.1114        | 6  | Y      | 20 | 2447.1374       | 1224.0723       | 816.3840        |
|         | 812.4289        | 406.7181        | 271.4811        | 7  | R[166] | 19 | 2284.0741       | 1142.5407       | 762.0295        |
|         | 941.4715        | 471.2394        | 314.4953        | 8  | E      | 18 | 2117.9647       | 1059.4860       | 706.6597        |
|         | 1070.5141       | 535.7607        | 357.5095        | 9  | E      | 17 | 1988.9221       | 994.9647        | 663.6456        |
|         | 1184.5570       | 592.7821        | 395.5238        | 10 | N      | 16 | 1859.8795       | 930.4434        | 620.6314        |
|         | 1351.5554       | 676.2813        | 451.1900        | 11 | S[167] | 15 | 1745.8366       | 873.4219        | 582.6170        |
|         | 1448.6081       | 724.8077        | 483.5409        | 12 | P      | 14 | 1578.8382       | 789.9227        | 526.9509        |
|         | 1561.6922       | 781.3497        | 521.2356        | 13 | I      | 13 | 1481.7855       | 741.3964        | 494.6000        |
|         | 1689.7508       | 845.3790        | 563.9218        | 14 | Q      | 12 | 1368.7014       | 684.8543        | 456.9053        |
|         | 1776.7828       | 888.8950        | 592.9324        | 15 | S      | 11 | 1240.6428       | 620.8250        | 414.2191        |
|         | 1873.8355       | 937.4214        | 625.2834        | 16 | P      | 10 | 1153.6108       | 577.3090        | 385.2084        |
|         | 1972.9040       | 986.9556        | 658.3062        | 17 | V      | 9  | 1056.5580       | 528.7826        | 352.8575        |
|         | 2100.9625       | 1050.9849       | 700.9924        | 18 | Q      | 8  | 957.4896        | 479.2484        | 319.8347        |
|         | 2198.0153       | 1099.5113       | 733.3433        | 19 | P      | 7  | 829.4310        | 415.2192        | 277.1485        |
|         | 2311.0994       | 1156.0533       | 771.0380        | 20 | I      | 6  | 732.3783        | 366.6928        | 244.7976        |
|         | 2424.1834       | 1212.5953       | 808.7327        | 21 | L      | 5  | 619.2942        | 310.1507        | 207.1029        |
|         | 2511.2154       | 1256.1114       | 837.7433        | 22 | S      | 4  | 506.2102        | 253.6087        | 169.4082        |
|         | 2678.2138       | 1339.6105       | 893.4095        | 23 | S[167] | 3  | 419.1781        | 210.0927        | 140.3976        |
|         | 2775.2666       | 1388.1369       | 925.7604        | 24 | P      | 2  | 252.1798        | 126.5935        | 84.7314         |
|         |                 |                 |                 | 25 | K[136] | 1  | 155.1270        | 78.0671         | 52.3805         |

# Annotated spectra from Saleem et. al. 2009

R.TPS<sub>167</sub>ALSMVSVPK<sub>136</sub>F/2

0.9518

1e+04

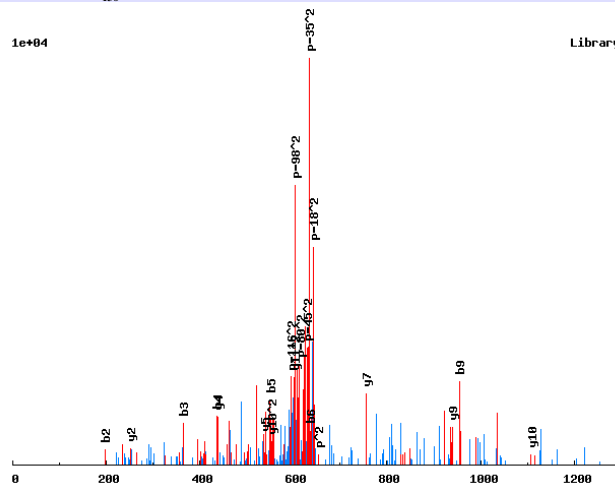

| Library | b <sup>1+</sup> | b <sup>2+</sup> | #  | AA     | #  | y <sup>1+</sup> | y <sup>2+</sup> |
|---------|-----------------|-----------------|----|--------|----|-----------------|-----------------|
|         | 102.0550        | 51.5311         | 1  | T      | 12 |                 |                 |
|         | 199.1077        | 100.0575        | 2  | P      | 11 | 1203.5934       | 602.3003        |
|         | 366.1061        | 183.5567        | 3  | S[167] | 10 | 1106.5407       | 553.7740        |
|         | 437.1432        | 219.0752        | 4  | A      | 9  | 939.5423        | 470.2748        |
|         | 550.2273        | 275.6173        | 5  | L      | 8  | 868.5052        | 434.7562        |
|         | 637.2593        | 319.1333        | 6  | S      | 7  | 755.4211        | 378.2142        |
|         | 768.2998        | 384.6535        | 7  | M      | 6  | 668.3891        | 334.6982        |
|         | 867.3682        | 434.1877        | 8  | V      | 5  | 537.3486        | 269.1779        |
|         | 954.4002        | 477.7037        | 9  | S      | 4  | 438.2802        | 219.6437        |
|         | 1053.4686       | 527.2380        | 10 | V      | 3  | 351.2482        | 176.1277        |
|         | 1150.5214       | 575.7643        | 11 | P      | 2  | 252.1798        | 126.5935        |
|         |                 |                 | 12 | K[136] | 1  | 155.1270        | 78.0671         |

# Annotated spectra from Saleem et. al. 2009

R.T.<sub>181</sub>PSALS<sub>167</sub>MVSVPK<sub>136</sub>F/2

0.9451

1e+04

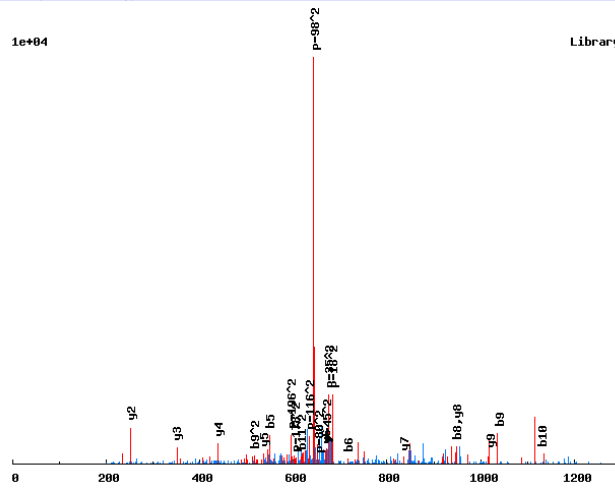

| Library | b <sup>1+</sup> | b <sup>2+</sup> | #  | AA | #     | y <sup>1+</sup> | y <sup>2+</sup> |          |
|---------|-----------------|-----------------|----|----|-------|-----------------|-----------------|----------|
|         | 182.0213        | 91.5143         | 1  | T  | [181] | 12              |                 |          |
|         | 279.0741        | 140.0407        | 2  | P  | 11    | 1203.5934       | 602.3003        |          |
|         | 366.1061        | 183.5567        | 3  | S  | 10    | 1106.5407       | 553.7740        |          |
|         | 437.1432        | 219.0752        | 4  | A  | 9     | 1019.5086       | 510.2580        |          |
|         | 550.2273        | 275.6173        | 5  | L  | 8     | 948.4715        | 474.7394        |          |
|         | 717.2256        | 359.1164        | 6  | S  | [167] | 7               | 835.3875        | 418.1974 |
|         | 848.2661        | 424.6367        | 7  | M  | 6     | 668.3891        | 334.6982        |          |
|         | 947.3345        | 474.1709        | 8  | V  | 5     | 537.3486        | 269.1779        |          |
|         | 1034.3665       | 517.6869        | 9  | S  | 4     | 438.2802        | 219.6437        |          |
|         | 1133.4350       | 567.2211        | 10 | V  | 3     | 351.2482        | 176.1277        |          |
|         | 1230.4877       | 615.7475        | 11 | P  | 2     | 252.1798        | 126.5935        |          |
|         |                 |                 | 12 | K  | [136] | 1               | 155.1270        | 78.0671  |

# Annotated spectra from Saleem et. al. 2009

R.TPS<sub>167</sub>NVS<sub>167</sub>FK<sub>136</sub>T/2

0.922

1e+04

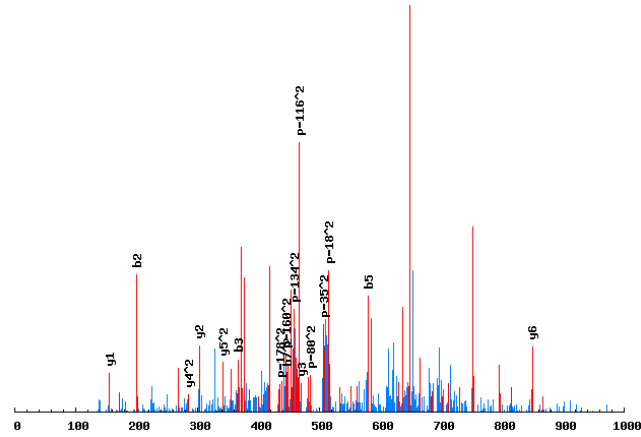

| Library | b <sup>1+</sup> | b <sup>2+</sup> | # | AA      | # | y <sup>1+</sup> | y <sup>2+</sup> |
|---------|-----------------|-----------------|---|---------|---|-----------------|-----------------|
|         | 102.0550        | 51.5311         | 1 | T       | 8 |                 |                 |
|         | 199.1077        | 100.0575        | 2 | P       | 7 | 946.3562        | 473.6818        |
|         | 366.1061        | 183.5567        | 3 | S [167] | 6 | 849.3035        | 425.1554        |
|         | 480.1490        | 240.5781        | 4 | N       | 5 | 682.3051        | 341.6562        |
|         | 579.2174        | 290.1124        | 5 | V       | 4 | 568.2622        | 284.6347        |
|         | 746.2158        | 373.6115        | 6 | S [167] | 3 | 469.1938        | 235.1005        |
|         | 893.2842        | 447.1457        | 7 | F       | 2 | 302.1954        | 151.6013        |
|         |                 |                 | 8 | K [136] | 1 | 155.1270        | 78.0671         |

# Annotated spectra from Saleem et. al. 2009

R.T.<sub>181</sub>PTPTPPVVAEPAIS<sub>167</sub>PR<sub>166</sub>PVSQR<sub>166</sub>T/3

0.9956

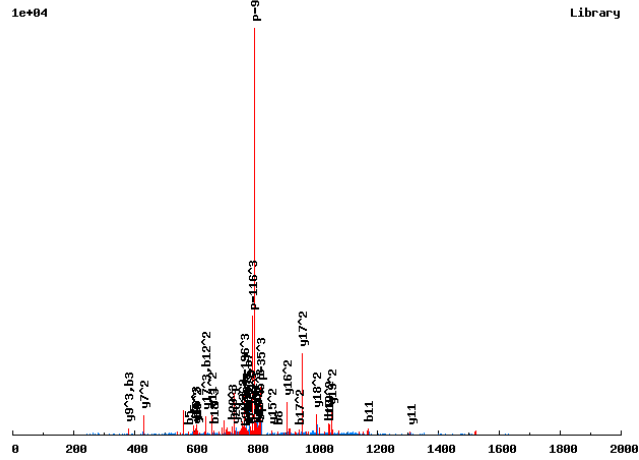

| Library | b <sup>1+</sup>  | b <sup>2+</sup>  | b <sup>3+</sup> | #  | AA                | #        | y <sup>1+</sup>  | y <sup>2+</sup>  | y <sup>3+</sup> |
|---------|------------------|------------------|-----------------|----|-------------------|----------|------------------|------------------|-----------------|
|         | 182.0213         | 91.5143          | 61.3453         | 1  | T [181]           | 22       |                  |                  |                 |
|         | 279.0741         | 140.0407         | 93.6962         | 2  | P                 | 21       | 2296.1963        | 1148.6018        | 766.0703        |
|         | <b>380.1217</b>  | 190.5645         | 127.3788        | 3  | T                 | 20       | 2199.1436        | 1100.0754        | <b>733.7194</b> |
|         | 477.1745         | 239.0909         | 159.7297        | 4  | P                 | 19       | 2098.0959        | <b>1049.5516</b> | 700.0368        |
|         | <b>578.2222</b>  | 289.6147         | 193.4122        | 5  | T                 | 18       | 2001.0431        | <b>1001.0252</b> | 667.6859        |
|         | 675.2749         | 338.1411         | 225.7632        | 6  | P                 | 17       | 1899.9955        | <b>950.5014</b>  | <b>634.0033</b> |
|         | <b>772.3277</b>  | 386.6675         | 258.1141        | 7  | P                 | 16       | 1802.9427        | <b>901.9750</b>  | <b>601.6524</b> |
|         | <b>871.3961</b>  | 436.2017         | 291.1369        | 8  | V                 | 15       | 1705.8899        | <b>853.4486</b>  | 569.3015        |
|         | 970.4645         | 485.7359         | 324.1597        | 9  | V                 | 14       | 1606.8215        | <b>803.9144</b>  | 536.2787        |
|         | <b>1041.5016</b> | 521.2545         | 347.8387        | 10 | A                 | 13       | 1507.7531        | <b>754.3802</b>  | 503.2559        |
|         | <b>1170.5442</b> | 585.7757         | 390.8529        | 11 | E                 | 12       | 1436.7160        | 718.8616         | 479.5769        |
|         | 1267.5970        | <b>634.3021</b>  | 423.2038        | 12 | P                 | 11       | <b>1307.6734</b> | <b>654.3404</b>  | 436.5627        |
|         | 1338.6341        | 669.8207         | 446.8829        | 13 | A                 | 10       | 1210.6207        | <b>605.8140</b>  | 404.2117        |
|         | 1451.7181        | 726.3627         | 484.5776        | 14 | I                 | 9        | 1139.5836        | 570.2954         | <b>380.5327</b> |
|         | 1618.7165        | <b>809.8619</b>  | 540.2437        | 15 | S [167]           | 8        | 1026.4995        | 513.7534         | 342.8380        |
|         | 1715.7693        | 858.3883         | 572.5946        | 16 | P                 | 7        | 859.5011         | <b>430.2542</b>  | 287.1719        |
|         | 1881.8786        | <b>941.4430</b>  | 627.9644        | 17 | R [166]           | 6        | 762.4484         | 381.7278         | 254.8210        |
|         | 1978.9314        | 989.9693         | <b>660.3153</b> | 18 | P                 | 5        | <b>596.3390</b>  | 298.6731         | 199.4512        |
|         | 2077.9998        | <b>1039.5035</b> | 693.3381        | 19 | V                 | 4        | 499.2862         | 250.1468         | 167.1003        |
|         | 2165.0318        | 1083.0196        | <b>722.3488</b> | 20 | S                 | 3        | 400.2178         | 200.6126         | 134.0775        |
|         | 2293.0904        | 1147.0489        | <b>765.0350</b> | 21 | Q                 | 2        | 313.1858         | 157.0965         | 105.0668        |
|         |                  |                  |                 |    | <b>22 R [166]</b> | <b>1</b> | 185.1272         | 93.0672          | 62.3806         |



# Annotated spectra from Saleem et. al. 2009

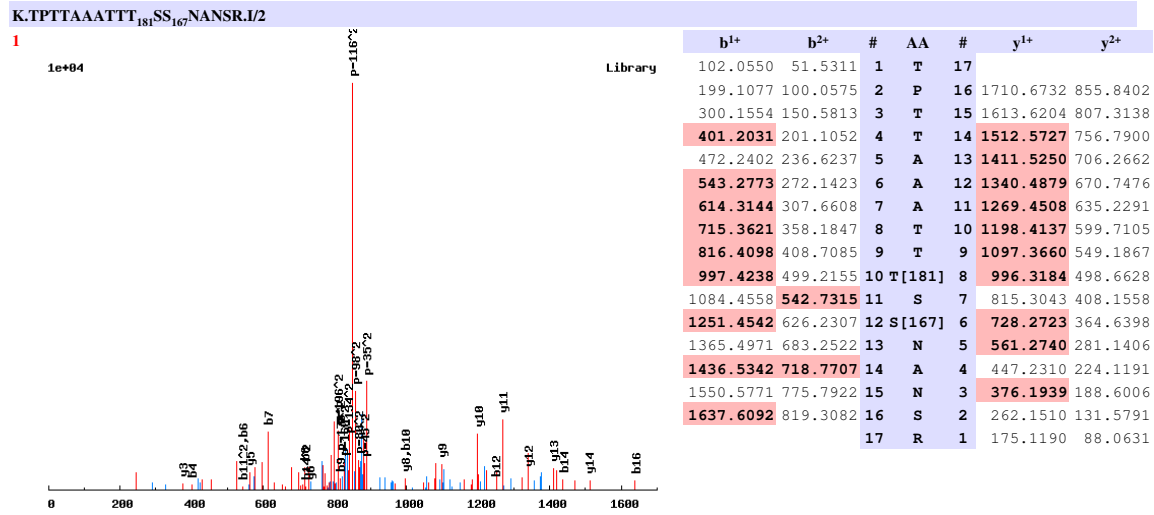

# Annotated spectra from Saleem et. al. 2009

K.TPTTAAATTT<sub>181</sub>SSNANS<sub>167</sub>RIGS<sub>167</sub>ALNT<sub>181</sub>PK.L/3

0.9796

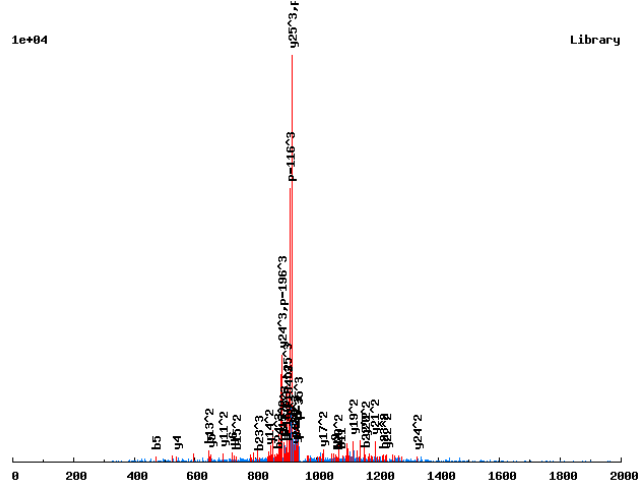

| Library | b <sup>1+</sup> | b <sup>2+</sup> | b <sup>3+</sup> | #  | AA     | #  | y <sup>1+</sup> | y <sup>2+</sup> | y <sup>3+</sup> |
|---------|-----------------|-----------------|-----------------|----|--------|----|-----------------|-----------------|-----------------|
|         | 102.0550        | 51.5311         | 34.6898         | 1  | T      | 26 |                 |                 |                 |
|         | 199.1077        | 100.0575        | 67.0408         | 2  | P      | 25 | 2752.1029       | 1376.5551       | 918.0391        |
|         | 300.1554        | 150.5813        | 100.7233        | 3  | T      | 24 | 2655.0501       | 1328.0287       | 885.6882        |
|         | 401.2031        | 201.1052        | 134.4059        | 4  | T      | 23 | 2554.0024       | 1277.5049       | 852.0057        |
|         | 472.2402        | 236.6237        | 158.0849        | 5  | A      | 22 | 2452.9548       | 1226.9810       | 818.3231        |
|         | 543.2773        | 272.1423        | 181.7640        | 6  | A      | 21 | 2381.9176       | 1191.4625       | 794.6441        |
|         | 614.3144        | 307.6608        | 205.4430        | 7  | A      | 20 | 2310.8805       | 1155.9439       | 770.9650        |
|         | 715.3621        | 358.1847        | 239.1256        | 8  | T      | 19 | 2239.8434       | 1120.4254       | 747.2860        |
|         | 816.4098        | 408.7085        | 272.8081        | 9  | T      | 18 | 2138.7957       | 1069.9015       | 713.6034        |
|         | 997.4238        | 499.2155        | 333.1461        | 10 | T[181] | 17 | 2037.7481       | 1019.3777       | 679.9209        |
|         | 1084.4558       | 542.7315        | 362.1568        | 11 | S      | 16 | 1856.7341       | 928.8707        | 619.5829        |
|         | 1171.4878       | 586.2476        | 391.1675        | 12 | S      | 15 | 1769.7020       | 885.3547        | 590.5722        |
|         | 1285.5308       | 643.2690        | 429.1818        | 13 | N      | 14 | 1682.6700       | 841.8386        | 561.5615        |
|         | 1356.5679       | 678.7876        | 452.8608        | 14 | A      | 13 | 1568.6271       | 784.8172        | 523.5472        |
|         | 1470.6108       | 735.8090        | 490.8751        | 15 | N      | 12 | 1497.5900       | 749.2986        | 499.8682        |
|         | 1637.6092       | 819.3082        | 546.5412        | 16 | S[167] | 11 | 1383.5470       | 692.2772        | 461.8539        |
|         | 1793.7103       | 897.3588        | 598.5749        | 17 | R      | 10 | 1216.5487       | 608.7780        | 406.1877        |
|         | 1906.7943       | 953.9008        | 636.2696        | 18 | I      | 9  | 1060.4476       | 530.7274        | 354.1540        |
|         | 1963.8158       | 982.4115        | 655.2768        | 19 | G      | 8  | 947.3635        | 474.1854        | 316.4594        |
|         | 2130.8142       | 1065.9107       | 710.9429        | 20 | S[167] | 7  | 890.3420        | 445.6747        | 297.4522        |
|         | 2201.8513       | 1101.4293       | 734.6219        | 21 | A      | 6  | 723.3437        | 362.1755        | 241.7861        |
|         | 2314.9353       | 1157.9713       | 772.3166        | 22 | L      | 5  | 652.3066        | 326.6569        | 218.1070        |
|         | 2428.9783       | 1214.9928       | 810.3309        | 23 | N      | 4  | 539.2225        | 270.1149        | 180.4124        |
|         | 2609.9923       | 1305.4998       | 870.6689        | 24 | T[181] | 3  | 425.1796        | 213.0934        | 142.3980        |
|         | 2707.0450       | 1354.0262       | 903.0199        | 25 | P      | 2  | 244.1656        | 122.5864        | 82.0600         |
|         |                 |                 |                 | 26 | K      | 1  | 147.1128        | 74.0600         | 49.7091         |

# Annotated spectra from Saleem et. al. 2009

K.TPTTAAATTT<sub>181</sub>SSNANSR<sub>166</sub>IGS<sub>167</sub>ALNT<sub>181</sub>PK<sub>136</sub>-L/3

0.6122

1e+04

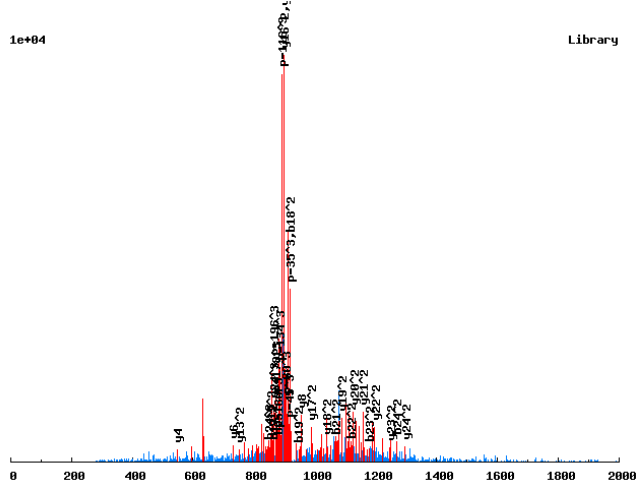

| Library | b <sup>1+</sup> | b <sup>2+</sup> | b <sup>3+</sup> | #  | AA     | #  | y <sup>1+</sup> | y <sup>2+</sup> | y <sup>3+</sup> |
|---------|-----------------|-----------------|-----------------|----|--------|----|-----------------|-----------------|-----------------|
|         | 102.0550        | 51.5311         | 34.6898         | 1  | T      | 26 |                 |                 |                 |
|         | 199.1077        | 100.0575        | 67.0408         | 2  | P      | 25 | 2690.1590       | 1345.5831       | 897.3912        |
|         | 300.1554        | 150.5813        | 100.7233        | 3  | T      | 24 | 2593.1063       | 1297.0568       | 865.0403        |
|         | 401.2031        | 201.1052        | 134.4059        | 4  | T      | 23 | 2492.0586       | 1246.5329       | 831.3577        |
|         | 472.2402        | 236.6237        | 158.0849        | 5  | A      | 22 | 2391.0109       | 1196.0091       | 797.6752        |
|         | 543.2773        | 272.1423        | 181.7640        | 6  | A      | 21 | 2319.9738       | 1160.4905       | 773.9961        |
|         | 614.3144        | 307.6608        | 205.4430        | 7  | A      | 20 | 2248.9367       | 1124.9720       | 750.3171        |
|         | 715.3621        | 358.1847        | 239.1256        | 8  | T      | 19 | 2177.8996       | 1089.4534       | 726.6380        |
|         | 816.4098        | 408.7085        | 272.8081        | 9  | T      | 18 | 2076.8519       | 1038.9296       | 692.9555        |
|         | 997.4238        | 499.2155        | 333.1461        | 10 | T[181] | 17 | 1975.8042       | 988.4057        | 659.2729        |
|         | 1084.4558       | 542.7315        | 362.1568        | 11 | S      | 16 | 1794.7902       | 897.8987        | 598.9349        |
|         | 1171.4878       | 586.2476        | 391.1675        | 12 | S      | 15 | 1707.7582       | 854.3827        | 569.9242        |
|         | 1285.5308       | 643.2690        | 429.1818        | 13 | N      | 14 | 1620.7261       | 810.8667        | 540.9136        |
|         | 1356.5679       | 678.7876        | 452.8608        | 14 | A      | 13 | 1506.6832       | 753.8452        | 502.8993        |
|         | 1470.6108       | 735.8090        | 490.8751        | 15 | N      | 12 | 1435.6461       | 718.3267        | 479.2202        |
|         | 1557.6428       | 779.3251        | 519.8858        | 16 | S      | 11 | 1321.6032       | 661.3052        | 441.2059        |
|         | 1723.7522       | 862.3798        | 575.2556        | 17 | R[166] | 10 | 1234.5711       | 617.7892        | 412.1952        |
|         | 1836.8363       | 918.9218        | 612.9503        | 18 | I      | 9  | 1068.4618       | 534.7345        | 356.8254        |
|         | 1893.8577       | 947.4325        | 631.9574        | 19 | G      | 8  | 955.3777        | 478.1925        | 319.1308        |
|         | 2060.8561       | 1030.9317       | 687.6236        | 20 | S[167] | 7  | 898.3562        | 449.6818        | 300.1236        |
|         | 2131.8932       | 1066.4502       | 711.3026        | 21 | A      | 6  | 731.3579        | 366.1826        | 244.4575        |
|         | 2244.9773       | 1122.9923       | 748.9973        | 22 | L      | 5  | 660.3208        | 330.6640        | 220.7784        |
|         | 2359.0202       | 1180.0137       | 787.0116        | 23 | N      | 4  | 547.2367        | 274.1220        | 183.0838        |
|         | 2540.0342       | 1270.5207       | 847.3496        | 24 | T[181] | 3  | 433.1938        | 217.1005        | 145.0694        |
|         | 2637.0870       | 1319.0471       | 879.7005        | 25 | P      | 2  | 252.1798        | 126.5935        | 84.7314         |
|         |                 |                 |                 | 26 | K[136] | 1  | 155.1270        | 78.0671         | 52.3805         |

# Annotated spectra from Saleem et. al. 2009

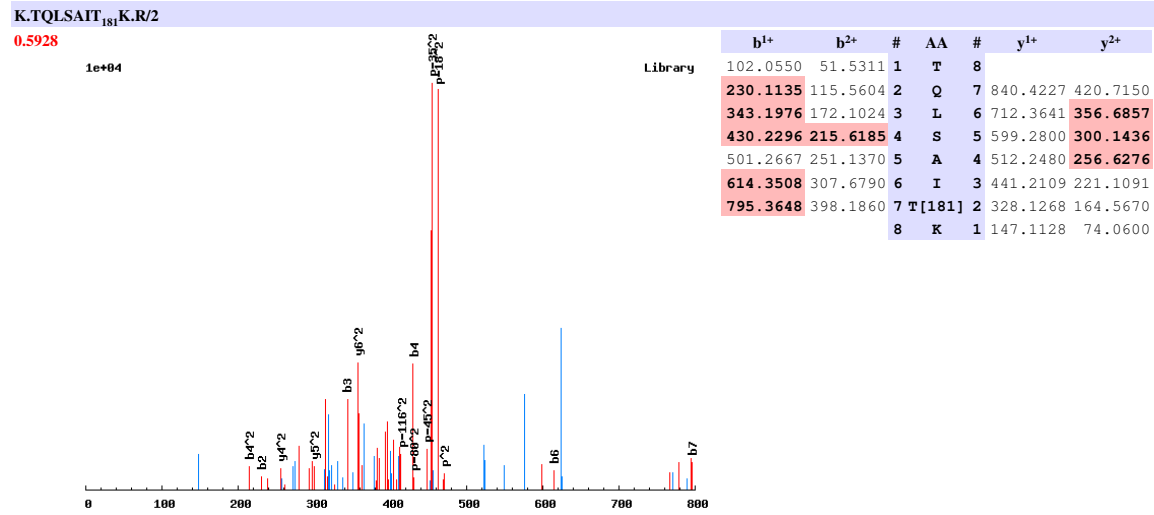

# Annotated spectra from Saleem et. al. 2009

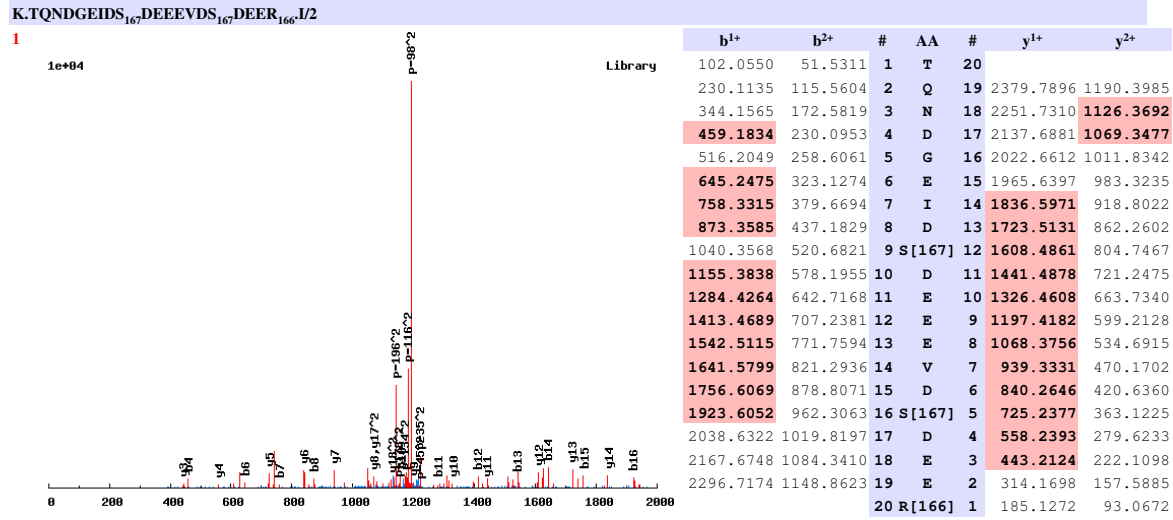

# Annotated spectra from Saleem et. al. 2009

R.TQNGS<sub>167</sub>DEDRNEEDGLER.S/3

0.6497

1e+04

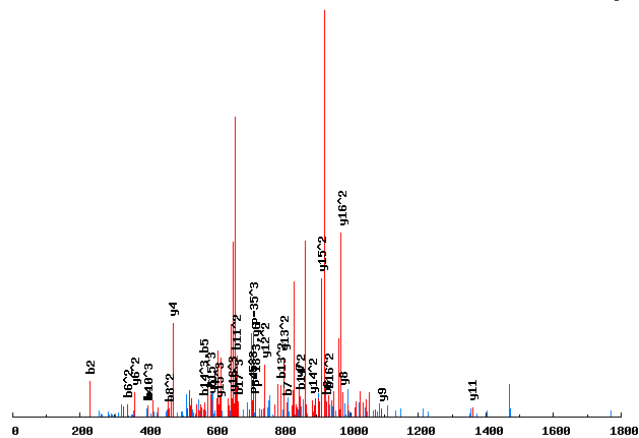

| Library | b <sup>1+</sup> | b <sup>2+</sup> | b <sup>3+</sup> | #  | AA     | #  | y <sup>1+</sup>  | y <sup>2+</sup> | y <sup>3+</sup> |
|---------|-----------------|-----------------|-----------------|----|--------|----|------------------|-----------------|-----------------|
|         | 102.0550        | 51.5311         | 34.6898         | 1  | T      | 18 |                  |                 |                 |
|         | <b>230.1135</b> | 115.5604        | 77.3760         | 2  | Q      | 17 | 2071.7836        | 1036.3954       | 691.2661        |
|         | 344.1565        | 172.5819        | 115.3903        | 3  | N      | 16 | 1943.7250        | <b>972.3662</b> | <b>648.5799</b> |
|         | <b>401.1779</b> | 201.0926        | 134.3975        | 4  | G      | 15 | 1829.6821        | <b>915.3447</b> | <b>610.5656</b> |
|         | <b>568.1763</b> | 284.5918        | 190.0636        | 5  | S[167] | 14 | 1772.6606        | <b>886.8340</b> | 591.5584        |
|         | 683.2032        | <b>342.1053</b> | 228.4059        | 6  | D      | 13 | 1605.6623        | <b>803.3348</b> | 535.8923        |
|         | <b>812.2458</b> | 406.6266        | 271.4201        | 7  | E      | 12 | 1490.6353        | <b>745.8213</b> | 497.5500        |
|         | <b>927.2728</b> | <b>464.1400</b> | 309.7624        | 8  | D      | 11 | <b>1361.5928</b> | 681.3000        | 454.5358        |
|         | 1083.3739       | 542.1906        | 361.7961        | 9  | R      | 10 | 1246.5658        | 623.7865        | 416.1935        |
|         | 1197.4168       | 599.2120        | <b>399.8105</b> | 10 | N      | 9  | <b>1090.4647</b> | 545.7360        | 364.1598        |
|         | 1326.4594       | <b>663.7333</b> | 442.8247        | 11 | E      | 8  | <b>976.4218</b>  | 488.7145        | 326.1454        |
|         | 1455.5020       | 728.2546        | 485.8388        | 12 | E      | 7  | <b>847.3792</b>  | 424.1932        | 283.1312        |
|         | 1584.5446       | <b>792.7759</b> | 528.8530        | 13 | E      | 6  | <b>718.3366</b>  | <b>359.6719</b> | 240.1171        |
|         | 1699.5715       | <b>850.2894</b> | <b>567.1954</b> | 14 | D      | 5  | <b>589.2940</b>  | 295.1506        | 197.1029        |
|         | 1756.5930       | 878.8001        | <b>586.2025</b> | 15 | G      | 4  | <b>474.2671</b>  | 237.6372        | 158.7605        |
|         | 1869.6770       | <b>935.3422</b> | 623.8972        | 16 | L      | 3  | 417.2456         | 209.1264        | 139.7534        |
|         | 1998.7196       | 999.8635        | <b>666.9114</b> | 17 | E      | 2  | 304.1615         | 152.5844        | 102.0587        |
|         |                 |                 |                 | 18 | R      | 1  | 175.1190         | 88.0631         | 59.0445         |

# Annotated spectra from Saleem et. al. 2009

R.TQS<sub>167</sub>S<sub>167</sub>GSLLSR.K/2

0.7981

1e+04

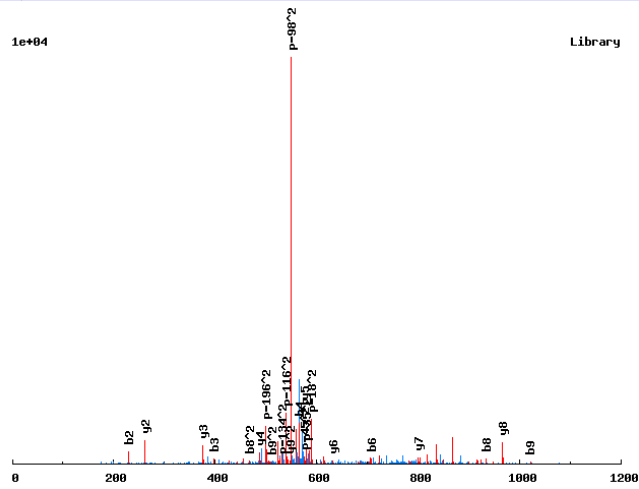

| Library | b <sup>1+</sup> | b <sup>2+</sup> | #  | AA     | #  | y <sup>1+</sup> | y <sup>2+</sup> |
|---------|-----------------|-----------------|----|--------|----|-----------------|-----------------|
|         | 102.0550        | 51.5311         | 1  | T      | 10 |                 |                 |
|         | 230.1135        | 115.5604        | 2  | Q      | 9  | 1094.4279       | 547.7176        |
|         | 397.1119        | 199.0596        | 3  | S[167] | 8  | 966.3693        | 483.6883        |
|         | 564.1103        | 282.5588        | 4  | S[167] | 7  | 799.3710        | 400.1891        |
|         | 621.1317        | 311.0695        | 5  | G      | 6  | 632.3726        | 316.6899        |
|         | 708.1638        | 354.5855        | 6  | S      | 5  | 575.3511        | 288.1792        |
|         | 821.2478        | 411.1275        | 7  | L      | 4  | 488.3191        | 244.6632        |
|         | 934.3319        | 467.6696        | 8  | L      | 3  | 375.2350        | 188.1212        |
|         | 1021.3639       | 511.1856        | 9  | S      | 2  | 262.1510        | 131.5791        |
|         |                 |                 | 10 | R      | 1  | 175.1190        | 88.0631         |

Annotated spectra from Saleem et. al. 2009

K.TQSS<sub>167</sub>K<sub>136</sub>DS<sub>167</sub>IGGNITTK<sub>136</sub>L/2

0.9805

1e+04

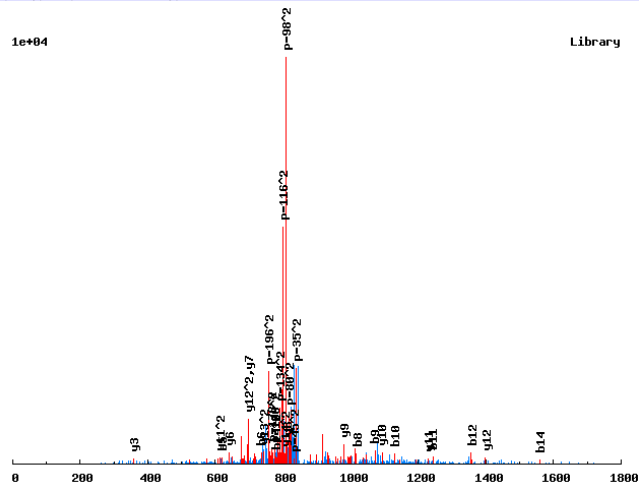

| Library | b <sup>1+</sup> | b <sup>2+</sup> | #  | AA     | #  | y <sup>1+</sup> | y <sup>2+</sup> |
|---------|-----------------|-----------------|----|--------|----|-----------------|-----------------|
|         | 102.0550        | 51.5311         | 1  | T      | 15 |                 |                 |
|         | 230.1135        | 115.5604        | 2  | Q      | 14 | 1611.6998       | 806.3535        |
|         | 317.1456        | 159.0764        | 3  | S      | 13 | 1483.6412       | 742.3242        |
|         | 484.1439        | 242.5756        | 4  | S[167] | 12 | 1396.6091       | 698.8082        |
|         | 620.2531        | 310.6302        | 5  | K[136] | 11 | 1229.6108       | 615.3090        |
|         | 735.2800        | 368.1437        | 6  | D      | 10 | 1093.5016       | 547.2545        |
|         | 902.2784        | 451.6428        | 7  | S[167] | 9  | 978.4747        | 489.7410        |
|         | 1015.3625       | 508.1849        | 8  | I      | 8  | 811.4763        | 406.2418        |
|         | 1072.3839       | 536.6956        | 9  | G      | 7  | 698.3923        | 349.6998        |
|         | 1129.4054       | 565.2063        | 10 | G      | 6  | 641.3708        | 321.1890        |
|         | 1243.4483       | 622.2278        | 11 | N      | 5  | 584.3493        | 292.6783        |
|         | 1356.5324       | 678.7698        | 12 | I      | 4  | 470.3064        | 235.6568        |
|         | 1457.5800       | 729.2937        | 13 | T      | 3  | 357.2224        | 179.1148        |
|         | 1558.6277       | 779.8175        | 14 | T      | 2  | 256.1747        | 128.5910        |
|         |                 |                 | 15 | K[136] | 1  | 155.1270        | 78.0671         |



# Annotated spectra from Saleem et. al. 2009

R.TR<sub>166</sub>S<sub>167</sub>LSSQS<sub>167</sub>FDNETSPAHRP<sub>166</sub>S/3

0.7219

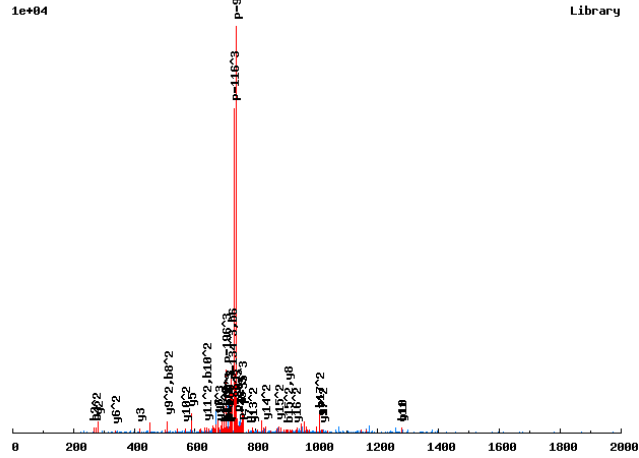

| Library | b <sup>1+</sup>  | b <sup>2+</sup>  | b <sup>3+</sup> | #  | AA     | #  | y <sup>1+</sup>  | y <sup>2+</sup>  | y <sup>3+</sup> |
|---------|------------------|------------------|-----------------|----|--------|----|------------------|------------------|-----------------|
|         | 102.0550         | 51.5311          | 34.6898         | 1  | T      | 19 |                  |                  |                 |
|         | <b>268.1643</b>  | 134.5858         | 90.0596         | 2  | R[166] | 18 | 2195.9021        | 1098.4547        | 732.6389        |
|         | 435.1627         | 218.0850         | 145.7258        | 3  | S[167] | 17 | 2029.7928        | <b>1015.4000</b> | <b>677.2691</b> |
|         | 548.2468         | <b>274.6270</b>  | 183.4204        | 4  | L      | 16 | 1862.7944        | <b>931.9008</b>  | 621.6030        |
|         | 635.2788         | 318.1430         | 212.4311        | 5  | S      | 15 | 1749.7103        | <b>875.3588</b>  | 583.9083        |
|         | <b>722.3108</b>  | 361.6591         | 241.4418        | 6  | S      | 14 | 1662.6783        | <b>831.8428</b>  | 554.8976        |
|         | 850.3694         | 425.6883         | 284.1280        | 7  | Q      | 13 | 1575.6463        | <b>788.3268</b>  | 525.8869        |
|         | 1017.3678        | <b>509.1875</b>  | 339.7941        | 8  | S[167] | 12 | 1447.5877        | 724.2975         | 483.2008        |
|         | 1164.4362        | 582.7217         | 388.8169        | 9  | F      | 11 | <b>1280.5893</b> | <b>640.7983</b>  | 427.5346        |
|         | <b>1279.4631</b> | <b>640.2352</b>  | 427.1592        | 10 | D      | 10 | 1133.5209        | <b>567.2641</b>  | 378.5118        |
|         | 1393.5060        | <b>697.2567</b>  | 465.1735        | 11 | N      | 9  | <b>1018.4940</b> | <b>509.7506</b>  | 340.1695        |
|         | 1522.5486        | 761.7780         | 508.1877        | 12 | E      | 8  | <b>904.4511</b>  | 452.7292         | 302.1552        |
|         | 1623.5963        | 812.3018         | 541.8703        | 13 | T      | 7  | <b>775.4085</b>  | 388.2079         | 259.1410        |
|         | 1710.6283        | 855.8178         | 570.8810        | 14 | S      | 6  | <b>674.3608</b>  | <b>337.6840</b>  | 225.4584        |
|         | 1807.6811        | <b>904.3442</b>  | 603.2319        | 15 | P      | 5  | <b>587.3288</b>  | 294.1680         | 196.4478        |
|         | 1878.7182        | 939.8627         | 626.9109        | 16 | A      | 4  | 490.2760         | 245.6416         | 164.0969        |
|         | 2015.7771        | <b>1008.3922</b> | 672.5972        | 17 | H      | 3  | <b>419.2389</b>  | 210.1231         | 140.4178        |
|         | 2112.8299        | 1056.9186        | <b>704.9481</b> | 18 | P      | 2  | <b>282.1800</b>  | 141.5936         | 94.7315         |
|         |                  |                  |                 | 19 | R[166] | 1  | 185.1272         | 93.0672          | 62.3806         |

# Annotated spectra from Saleem et. al. 2009

R.TR<sub>166</sub>S<sub>167</sub>NPHDSSPSYQDDLEK<sub>136</sub>-A/3

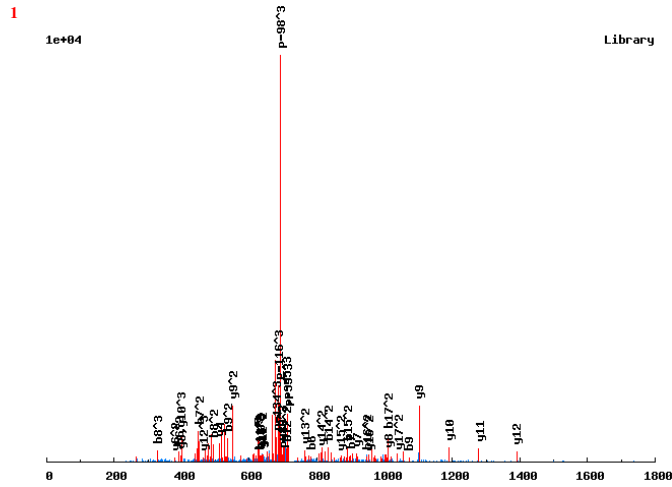

| Library | b <sup>1+</sup> | b <sup>2+</sup> | b <sup>3+</sup> | #  | AA     | #  | y <sup>1+</sup> | y <sup>2+</sup> | y <sup>3+</sup> |
|---------|-----------------|-----------------|-----------------|----|--------|----|-----------------|-----------------|-----------------|
|         | 102.0550        | 51.5311         | 34.6898         | 1  | T      | 18 |                 |                 |                 |
|         | 268.1643        | 134.5858        | 90.0596         | 2  | R[166] | 17 | 2072.8676       | 1036.9374       | 691.6274        |
|         | 435.1627        | 218.0850        | 145.7258        | 3  | S[167] | 16 | 1906.7582       | 953.8827        | 636.2576        |
|         | 549.2056        | 275.1065        | 183.7401        | 4  | N      | 15 | 1739.7598       | 870.3836        | 580.5915        |
|         | 646.2584        | 323.6328        | 216.0910        | 5  | P      | 14 | 1625.7169       | 813.3621        | 542.5772        |
|         | 783.3173        | 392.1623        | 261.7773        | 6  | H      | 13 | 1528.6641       | 764.8357        | 510.2262        |
|         | 898.3442        | 449.6758        | 300.1196        | 7  | D      | 12 | 1391.6052       | 696.3063        | 464.5399        |
|         | 985.3763        | 493.1918        | 329.1303        | 8  | S      | 11 | 1276.5783       | 638.7928        | 426.1976        |
|         | 1072.4083       | 536.7078        | 358.1410        | 9  | S      | 10 | 1189.5463       | 595.2768        | 397.1869        |
|         | 1169.4611       | 585.2342        | 390.4919        | 10 | P      | 9  | 1102.5142       | 551.7608        | 368.1763        |
|         | 1256.4931       | 628.7502        | 419.5026        | 11 | S      | 8  | 1005.4615       | 503.2344        | 335.8253        |
|         | 1419.5564       | 710.2819        | 473.8570        | 12 | Y      | 7  | 918.4294        | 459.7184        | 306.8147        |
|         | 1547.6150       | 774.3111        | 516.5432        | 13 | Q      | 6  | 755.3661        | 378.1867        | 252.4602        |
|         | 1662.6419       | 831.8246        | 554.8855        | 14 | D      | 5  | 627.3075        | 314.1574        | 209.7740        |
|         | 1777.6689       | 889.3381        | 593.2278        | 15 | D      | 4  | 512.2806        | 256.6439        | 171.4317        |
|         | 1890.7529       | 945.8801        | 630.9225        | 16 | L      | 3  | 397.2536        | 199.1305        | 133.0894        |
|         | 2019.7955       | 1010.4014       | 673.9367        | 17 | E      | 2  | 284.1696        | 142.5884        | 95.3947         |
|         |                 |                 |                 | 18 | K[136] | 1  | 155.1270        | 78.0671         | 52.3805         |

# Annotated spectra from Saleem et. al. 2009

R.T.<sub>181</sub>R.<sub>166</sub>S.<sub>167</sub>NPHDSSPSYQDDLEK.<sub>136</sub>-A/3

0.9959

1e+04

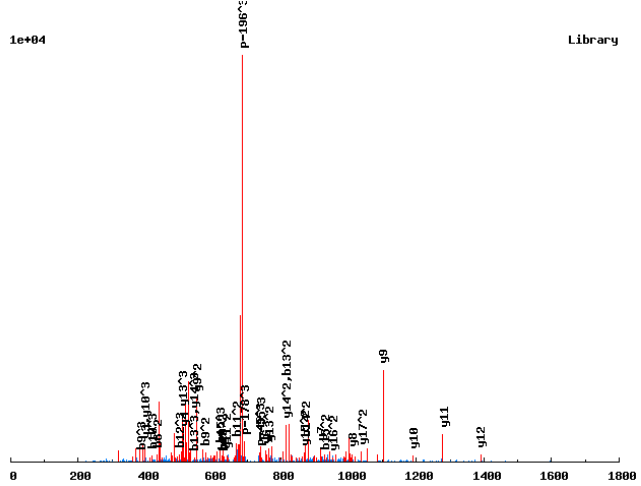

| Library | b <sup>1+</sup> | b <sup>2+</sup> | b <sup>3+</sup> | #  | AA     | #  | y <sup>1+</sup> | y <sup>2+</sup> | y <sup>3+</sup> |
|---------|-----------------|-----------------|-----------------|----|--------|----|-----------------|-----------------|-----------------|
|         | 182.0213        | 91.5143         | 61.3453         | 1  | T[181] | 18 |                 |                 |                 |
|         | 348.1307        | 174.5690        | 116.7151        | 2  | R[166] | 17 | 2072.8676       | 1036.9374       | 691.6274        |
|         | 515.1290        | 258.0682        | 172.3812        | 3  | S[167] | 16 | 1906.7582       | 953.8827        | 636.2576        |
|         | 629.1720        | 315.0896        | 210.3955        | 4  | N      | 15 | 1739.7598       | 870.3836        | 580.5915        |
|         | 726.2247        | 363.6160        | 242.7464        | 5  | P      | 14 | 1625.7169       | 813.3621        | 542.5772        |
|         | 863.2836        | 432.1455        | 288.4327        | 6  | H      | 13 | 1528.6641       | 764.8357        | 510.2262        |
|         | 978.3106        | 489.6589        | 326.7750        | 7  | D      | 12 | 1391.6052       | 696.3063        | 464.5399        |
|         | 1065.3426       | 533.1749        | 355.7857        | 8  | S      | 11 | 1276.5783       | 638.7928        | 426.1976        |
|         | 1152.3746       | 576.6910        | 384.7964        | 9  | S      | 10 | 1189.5463       | 595.2768        | 397.1869        |
|         | 1249.4274       | 625.2173        | 417.1473        | 10 | P      | 9  | 1102.5142       | 551.7608        | 368.1763        |
|         | 1336.4594       | 668.7334        | 446.1580        | 11 | S      | 8  | 1005.4615       | 503.2344        | 335.8253        |
|         | 1499.5228       | 750.2650        | 500.5124        | 12 | Y      | 7  | 918.4294        | 459.7184        | 306.8147        |
|         | 1627.5813       | 814.2943        | 543.1986        | 13 | Q      | 6  | 755.3661        | 378.1867        | 252.4602        |
|         | 1742.6083       | 871.8078        | 581.5409        | 14 | D      | 5  | 627.3075        | 314.1574        | 209.7740        |
|         | 1857.6352       | 929.3212        | 619.8833        | 15 | D      | 4  | 512.2806        | 256.6439        | 171.4317        |
|         | 1970.7193       | 985.8633        | 657.5779        | 16 | L      | 3  | 397.2536        | 199.1305        | 133.0894        |
|         | 2099.7619       | 1050.3846       | 700.5921        | 17 | E      | 2  | 284.1696        | 142.5884        | 95.3947         |
|         |                 |                 |                 | 18 | K[136] | 1  | 155.1270        | 78.0671         | 52.3805         |

# Annotated spectra from Saleem et. al. 2009

R.TRSPELQDNLK<sub>167</sub>SS<sub>167</sub>SLLQDTPQR.Q/3

0.7337

1e+04

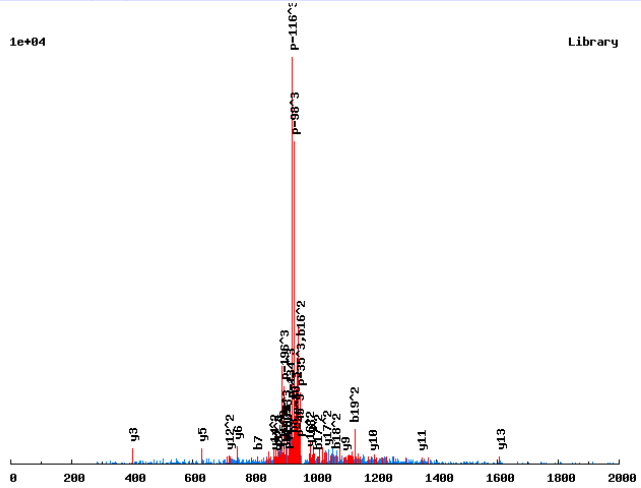

| Library | b <sup>1+</sup> | b <sup>2+</sup> | b <sup>3+</sup> | #  | AA     | #  | y <sup>1+</sup> | y <sup>2+</sup> | y <sup>3+</sup> |
|---------|-----------------|-----------------|-----------------|----|--------|----|-----------------|-----------------|-----------------|
|         | 102.0550        | 51.5311         | 34.6898         | 1  | T      | 24 |                 |                 |                 |
|         | 258.1561        | 129.5817        | 86.7235         | 2  | R      | 23 | 2787.2710       | 1394.1391       | 929.7619        |
|         | 345.1881        | 173.0977        | 115.7342        | 3  | S      | 22 | 2631.1699       | 1316.0886       | 877.7281        |
|         | 442.2409        | 221.6241        | 148.0851        | 4  | P      | 21 | 2544.1379       | 1272.5726       | 848.7175        |
|         | 571.2835        | 286.1454        | 191.0993        | 5  | E      | 20 | 2447.0851       | 1224.0462       | 816.3666        |
|         | 684.3675        | 342.6874        | 228.7940        | 6  | L      | 19 | 2318.0425       | 1159.5249       | 773.3524        |
|         | 812.4261        | 406.7167        | 271.4802        | 7  | Q      | 18 | 2204.9584       | 1102.9829       | 735.6577        |
|         | 927.4530        | 464.2302        | 309.8225        | 8  | D      | 17 | 2076.8999       | 1038.9536       | 692.9715        |
|         | 1041.4960       | 521.2516        | 347.8368        | 9  | N      | 16 | 1961.8729       | 981.4401        | 654.6292        |
|         | 1154.5800       | 577.7937        | 385.5315        | 10 | L      | 15 | 1847.8300       | 924.4186        | 616.6149        |
|         | 1282.6750       | 641.8411        | 428.2298        | 11 | K      | 14 | 1734.7459       | 867.8766        | 578.9202        |
|         | 1449.6733       | 725.3403        | 483.8960        | 12 | S[167] | 13 | 1606.6510       | 803.8291        | 536.2218        |
|         | 1536.7054       | 768.8563        | 512.9066        | 13 | S      | 12 | 1439.6526       | 720.3299        | 480.5557        |
|         | 1703.7037       | 852.3555        | 568.5728        | 14 | S[167] | 11 | 1352.6206       | 676.8139        | 451.5450        |
|         | 1790.7358       | 895.8715        | 597.5834        | 15 | S      | 10 | 1185.6222       | 593.3148        | 395.8789        |
|         | 1903.8198       | 952.4136        | 635.2781        | 16 | L      | 9  | 1098.5902       | 549.7987        | 366.8683        |
|         | 2016.9039       | 1008.9556       | 672.9728        | 17 | L      | 8  | 985.5061        | 493.2567        | 329.1736        |
|         | 2144.9625       | 1072.9849       | 715.6590        | 18 | Q      | 7  | 872.4221        | 436.7147        | 291.4789        |
|         | 2259.9894       | 1130.4983       | 754.0013        | 19 | D      | 6  | 744.3635        | 372.6854        | 248.7927        |
|         | 2388.0480       | 1194.5276       | 796.6875        | 20 | Q      | 5  | 629.3366        | 315.1719        | 210.4504        |
|         | 2489.0957       | 1245.0515       | 830.3701        | 21 | T      | 4  | 501.2780        | 251.1426        | 167.7642        |
|         | 2586.1484       | 1293.5779       | 862.7210        | 22 | P      | 3  | 400.2303        | 200.6188        | 134.0816        |
|         | 2714.2070       | 1357.6071       | 905.4072        | 23 | Q      | 2  | 303.1775        | 152.0924        | 101.7307        |
|         |                 |                 |                 | 24 | R      | 1  | 175.1190        | 88.0631         | 59.0445         |

# Annotated spectra from Saleem et. al. 2009

R.TRS<sub>167</sub>PELQDNLKSS<sub>167</sub>SS<sub>167</sub>LLQDQTPQR.Q/3

0.9904

1e+04

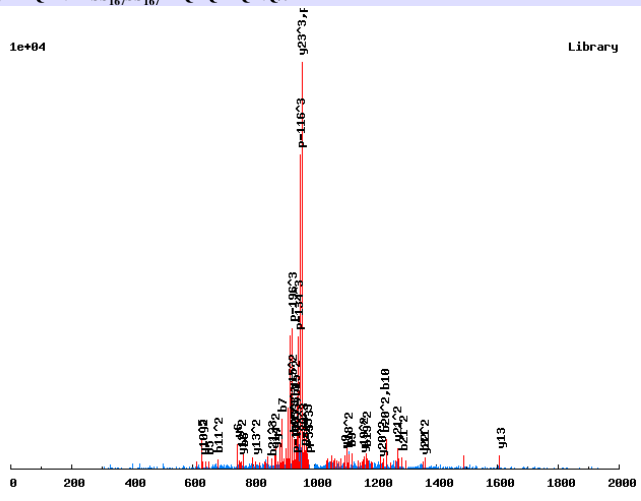

| Library | b <sup>1+</sup> | b <sup>2+</sup> | b <sup>3+</sup> | #  | AA     | #  | y <sup>1+</sup> | y <sup>2+</sup> | y <sup>3+</sup> |
|---------|-----------------|-----------------|-----------------|----|--------|----|-----------------|-----------------|-----------------|
|         | 102.0550        | 51.5311         | 34.6898         | 1  | T      | 24 |                 |                 |                 |
|         | 258.1561        | 129.5817        | 86.7235         | 2  | R      | 23 | 2867.2373       | 1434.1223       | 956.4173        |
|         | 425.1544        | 213.0809        | 142.3897        | 3  | S[167] | 22 | 2711.1362       | 1356.0717       | 904.3836        |
|         | 522.2072        | 261.6072        | 174.7406        | 4  | P      | 21 | 2544.1379       | 1272.5726       | 848.7175        |
|         | 651.2498        | 326.1285        | 217.7548        | 5  | E      | 20 | 2447.0851       | 1224.0462       | 816.3666        |
|         | 764.3338        | 382.6706        | 255.4495        | 6  | L      | 19 | 2318.0425       | 1159.5249       | 773.3524        |
|         | 892.3924        | 446.6999        | 298.1357        | 7  | Q      | 18 | 2204.9584       | 1102.9829       | 735.6577        |
|         | 1007.4194       | 504.2133        | 336.4780        | 8  | D      | 17 | 2076.8999       | 1038.9536       | 692.9715        |
|         | 1121.4623       | 561.2348        | 374.4923        | 9  | N      | 16 | 1961.8729       | 981.4401        | 654.6292        |
|         | 1234.5464       | 617.7768        | 412.1870        | 10 | L      | 15 | 1847.8300       | 924.4186        | 616.6149        |
|         | 1362.6413       | 681.8243        | 454.8853        | 11 | K      | 14 | 1734.7459       | 867.8766        | 578.9202        |
|         | 1449.6733       | 725.3403        | 483.8960        | 12 | S      | 13 | 1606.6510       | 803.8291        | 536.2218        |
|         | 1616.6717       | 808.8395        | 539.5621        | 13 | S[167] | 12 | 1519.6189       | 760.3131        | 507.2112        |
|         | 1703.7037       | 852.3555        | 568.5728        | 14 | S      | 11 | 1352.6206       | 676.8139        | 451.5450        |
|         | 1870.7021       | 935.8547        | 624.2389        | 15 | S[167] | 10 | 1265.5886       | 633.2979        | 422.5344        |
|         | 1983.7862       | 992.3967        | 661.9336        | 16 | L      | 9  | 1098.5902       | 549.7987        | 366.8683        |
|         | 2096.8702       | 1048.9387       | 699.6283        | 17 | L      | 8  | 985.5061        | 493.2567        | 329.1736        |
|         | 2224.9288       | 1112.9680       | 742.3145        | 18 | Q      | 7  | 872.4221        | 436.7147        | 291.4789        |
|         | 2339.9557       | 1170.4815       | 780.6568        | 19 | D      | 6  | 744.3635        | 372.6854        | 248.7927        |
|         | 2468.0143       | 1234.5108       | 823.3430        | 20 | Q      | 5  | 629.3366        | 315.1719        | 210.4504        |
|         | 2569.0620       | 1285.0346       | 857.0255        | 21 | T      | 4  | 501.2780        | 251.1426        | 167.7642        |
|         | 2666.1148       | 1333.5610       | 889.3764        | 22 | P      | 3  | 400.2303        | 200.6188        | 134.0816        |
|         | 2794.1733       | 1397.5903       | 932.0626        | 23 | Q      | 2  | 303.1775        | 152.0924        | 101.7307        |
|         |                 |                 |                 | 24 | R      | 1  | 175.1190        | 88.0631         | 59.0445         |

# Annotated spectra from Saleem et. al. 2009

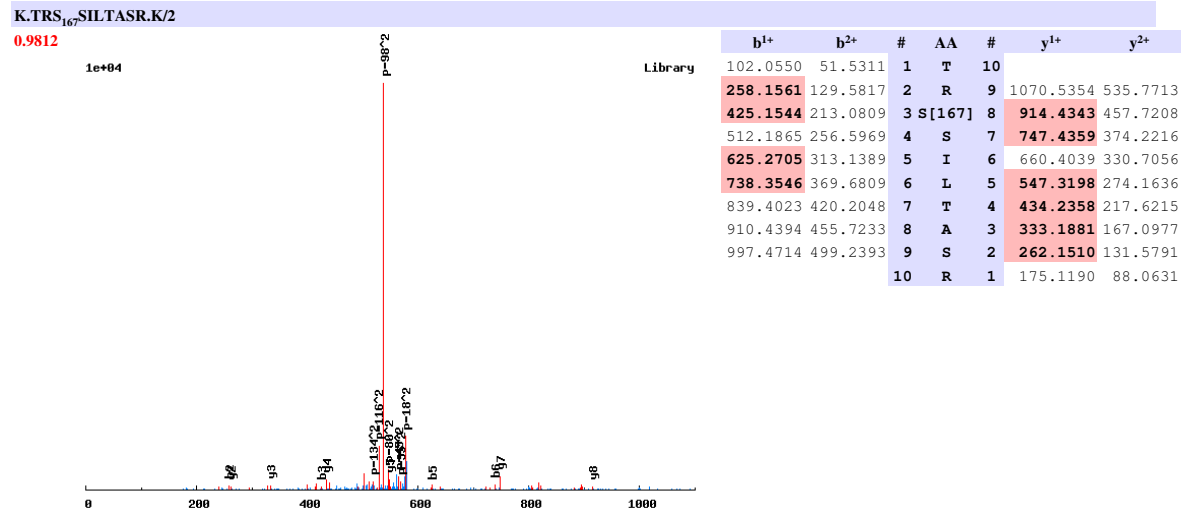

# Annotated spectra from Saleem et. al. 2009

K.TRVSL<sub>167</sub>S<sub>167</sub>TSLALKR.Y/2

0.9845

1e+04

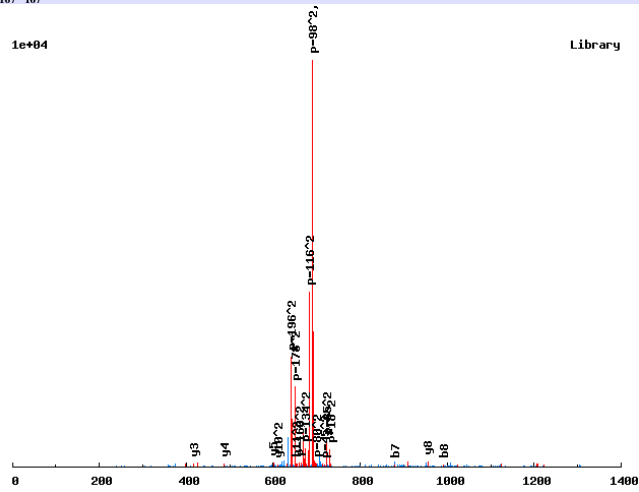

| Library | b <sup>1+</sup> | b <sup>2+</sup> | #  | AA     | #  | y <sup>1+</sup> | y <sup>2+</sup> |
|---------|-----------------|-----------------|----|--------|----|-----------------|-----------------|
|         | 102.0550        | 51.5311         | 1  | T      | 12 |                 |                 |
|         | 258.1561        | 129.5817        | 2  | R      | 11 | 1377.6651       | 689.3362        |
|         | 357.2245        | 179.1159        | 3  | V      | 10 | 1221.5640       | 611.2856        |
|         | 524.2228        | 262.6151        | 4  | S[167] | 9  | 1122.4956       | 561.7514        |
|         | 691.2212        | 346.1142        | 5  | S[167] | 8  | 955.4972        | 478.2522        |
|         | 792.2689        | 396.6381        | 6  | T      | 7  | 788.4989        | 394.7531        |
|         | 879.3009        | 440.1541        | 7  | S      | 6  | 687.4512        | 344.2292        |
|         | 992.3850        | 496.6961        | 8  | L      | 5  | 600.4191        | 300.7132        |
|         | 1063.4221       | 532.2147        | 9  | A      | 4  | 487.3351        | 244.1712        |
|         | 1176.5061       | 588.7567        | 10 | L      | 3  | 416.2980        | 208.6526        |
|         | 1304.6011       | 652.8042        | 11 | K      | 2  | 303.2139        | 152.1106        |
|         |                 |                 | 12 | R      | 1  | 175.1190        | 88.0631         |

# Annotated spectra from Saleem et. al. 2009

R.TSATEDT<sub>181</sub>PLS<sub>167</sub>QNESTR.A/2

0.9985

1e+04

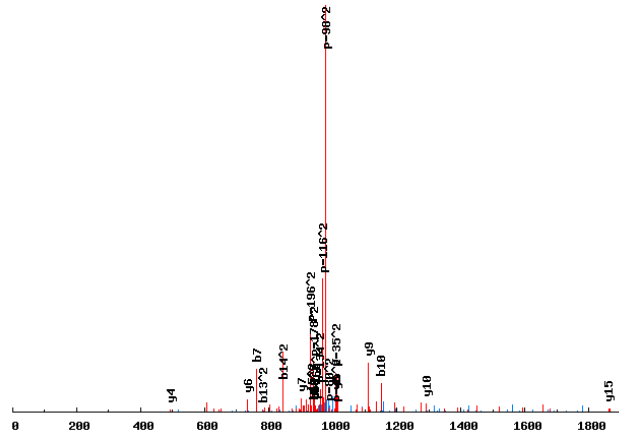

| Library | b <sup>1+</sup> | b <sup>2+</sup> | #  | AA     | #  | y <sup>1+</sup> | y <sup>2+</sup> |
|---------|-----------------|-----------------|----|--------|----|-----------------|-----------------|
|         | 102.0550        | 51.5311         | 1  | T      | 17 |                 |                 |
|         | 189.0870        | 95.0471         | 2  | S      | 16 | 1951.7794       | 976.3933        |
|         | 260.1241        | 130.5657        | 3  | A      | 15 | 1864.7474       | 932.8773        |
|         | 361.1718        | 181.0895        | 4  | T      | 14 | 1793.7103       | 897.3588        |
|         | 517.2729        | 259.1401        | 5  | R      | 13 | 1692.6626       | 846.8349        |
|         | 646.3155        | 323.6614        | 6  | E      | 12 | 1536.5615       | 768.7844        |
|         | 761.3424        | 381.1749        | 7  | D      | 11 | 1407.5189       | 704.2631        |
|         | 942.3564        | 471.6819        | 8  | T[181] | 10 | 1292.4920       | 646.7496        |
|         | 1039.4092       | 520.2082        | 9  | P      | 9  | 1111.4779       | 556.2426        |
|         | 1152.4933       | 576.7503        | 10 | L      | 8  | 1014.4252       | 507.7162        |
|         | 1319.4916       | 660.2494        | 11 | S[167] | 7  | 901.3411        | 451.1742        |
|         | 1447.5502       | 724.2787        | 12 | Q      | 6  | 734.3428        | 367.6750        |
|         | 1561.5931       | 781.3002        | 13 | N      | 5  | 606.2842        | 303.6457        |
|         | 1690.6357       | 845.8215        | 14 | E      | 4  | 492.2412        | 246.6243        |
|         | 1777.6677       | 889.3375        | 15 | S      | 3  | 363.1987        | 182.1030        |
|         | 1878.7154       | 939.8614        | 16 | T      | 2  | 276.1666        | 138.5870        |
|         |                 |                 | 17 | R      | 1  | 175.1190        | 88.0631         |



# Annotated spectra from Saleem et. al. 2009

K.TSIKS<sub>167</sub>PRS<sub>167</sub>SADNLLPSLQK.S/3

0.9611

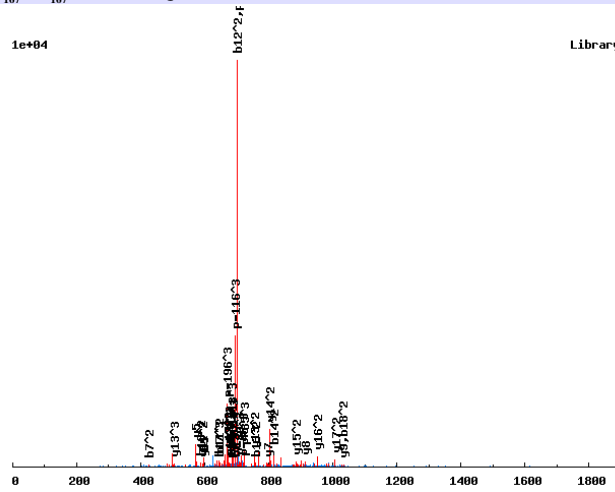

| Library | b <sup>1+</sup> | b <sup>2+</sup> | b <sup>3+</sup> | #  | AA     | #  | y <sup>1+</sup> | y <sup>2+</sup> | y <sup>3+</sup> |
|---------|-----------------|-----------------|-----------------|----|--------|----|-----------------|-----------------|-----------------|
|         | 102.0550        | 51.5311         | 34.6898         | 1  | T      | 19 |                 |                 |                 |
|         | 189.0870        | 95.0471         | 63.7005         | 2  | S      | 18 | 2101.0090       | 1051.0081       | 701.0079        |
|         | 302.1710        | 151.5892        | 101.3952        | 3  | I      | 17 | 2013.9770       | 1007.4921       | 671.9972        |
|         | 430.2660        | 215.6366        | 144.0935        | 4  | K      | 16 | 1900.8929       | 950.9501        | 634.3025        |
|         | 597.2644        | 299.1358        | 199.7596        | 5  | S[167] | 15 | 1772.7980       | 886.9026        | 591.6042        |
|         | 694.3171        | 347.6622        | 232.1106        | 6  | P      | 14 | 1605.7996       | 803.4034        | 535.9381        |
|         | 850.4182        | 425.7128        | 284.1443        | 7  | R      | 13 | 1508.7468       | 754.8771        | 503.5871        |
|         | 1017.4166       | 509.2119        | 339.8104        | 8  | S[167] | 12 | 1352.6457       | 676.8265        | 451.5534        |
|         | 1104.4486       | 552.7280        | 368.8211        | 9  | S      | 11 | 1185.6474       | 593.3273        | 395.8873        |
|         | 1175.4857       | 588.2465        | 392.5001        | 10 | A      | 10 | 1098.6153       | 549.8113        | 366.8766        |
|         | 1290.5127       | 645.7600        | 430.8424        | 11 | D      | 9  | 1027.5782       | 514.2928        | 343.1976        |
|         | 1404.5556       | 702.7814        | 468.8567        | 12 | N      | 8  | 912.5513        | 456.7793        | 304.8553        |
|         | 1517.6397       | 759.3235        | 506.5514        | 13 | L      | 7  | 798.5084        | 399.7578        | 266.8410        |
|         | 1630.7237       | 815.8655        | 544.2461        | 14 | L      | 6  | 685.4243        | 343.2158        | 229.1463        |
|         | 1727.7765       | 864.3919        | 576.5970        | 15 | P      | 5  | 572.3402        | 286.6738        | 191.4516        |
|         | 1814.8085       | 907.9079        | 605.6077        | 16 | S      | 4  | 475.2875        | 238.1474        | 159.1007        |
|         | 1927.8926       | 964.4499        | 643.3024        | 17 | L      | 3  | 388.2554        | 194.6314        | 130.0900        |
|         | 2055.9512       | 1028.4792       | 685.9886        | 18 | Q      | 2  | 275.1714        | 138.0893        | 92.3953         |
|         |                 |                 |                 | 19 | K      | 1  | 147.1128        | 74.0600         | 49.7091         |

# Annotated spectra from Saleem et. al. 2009

K.TSLSPINS<sub>167</sub>KS<sub>167</sub>NIALAHSETPTSSNNKE/3

0.9623

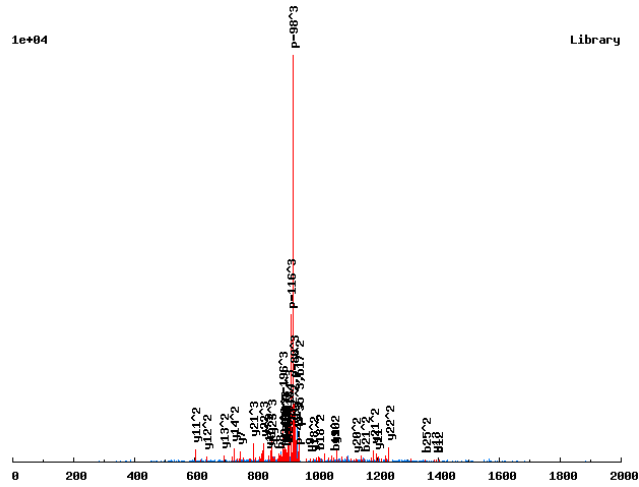

| Library | b <sup>1+</sup> | b <sup>2+</sup> | b <sup>3+</sup> | #  | AA     | #  | y <sup>1+</sup> | y <sup>2+</sup> | y <sup>3+</sup> |
|---------|-----------------|-----------------|-----------------|----|--------|----|-----------------|-----------------|-----------------|
|         | 102.0550        | 51.5311         | 34.6898         | 1  | T      | 26 |                 |                 |                 |
|         | 189.0870        | 95.0471         | 63.7005         | 2  | S      | 25 | 2757.2492       | 1379.1282       | 919.7546        |
|         | 302.1710        | 151.5892        | 101.3952        | 3  | L      | 24 | 2670.2172       | 1335.6122       | 890.7439        |
|         | 389.2031        | 195.1052        | 130.4059        | 4  | S      | 23 | 2557.1331       | 1279.0702       | 853.0492        |
|         | 486.2558        | 243.6316        | 162.7568        | 5  | P      | 22 | 2470.1011       | 1235.5542       | 824.0385        |
|         | 599.3399        | 300.1736        | 200.4515        | 6  | I      | 21 | 2373.0483       | 1187.0278       | 791.6876        |
|         | 713.3828        | 357.1951        | 238.4658        | 7  | N      | 20 | 2259.9643       | 1130.4858       | 753.9929        |
|         | 880.3812        | 440.6942        | 294.1319        | 8  | S[167] | 19 | 2145.9213       | 1073.4643       | 715.9786        |
|         | 1008.4762       | 504.7417        | 336.8302        | 9  | K      | 18 | 1978.9230       | 989.9651        | 660.3125        |
|         | 1175.4745       | 588.2409        | 392.4964        | 10 | S[167] | 17 | 1850.8280       | 925.9176        | 617.6142        |
|         | 1289.5174       | 645.2624        | 430.5107        | 11 | N      | 16 | 1683.8296       | 842.4185        | 561.9481        |
|         | 1402.6015       | 701.8044        | 468.2054        | 12 | I      | 15 | 1569.7867       | 785.3970        | 523.9338        |
|         | 1473.6386       | 737.3229        | 491.8844        | 13 | A      | 14 | 1456.7026       | 728.8550        | 486.2391        |
|         | 1586.7227       | 793.8650        | 529.5791        | 14 | L      | 13 | 1385.6655       | 693.3364        | 462.5600        |
|         | 1657.7598       | 829.3835        | 553.2581        | 15 | A      | 12 | 1272.5815       | 636.7944        | 424.8653        |
|         | 1794.8187       | 897.9130        | 598.9444        | 16 | H      | 11 | 1201.5444       | 601.2758        | 401.1863        |
|         | 1881.8507       | 941.4290        | 627.9551        | 17 | S      | 10 | 1064.4855       | 532.7464        | 355.5000        |
|         | 2010.8933       | 1005.9503       | 670.9693        | 18 | E      | 9  | 977.4534        | 489.2304        | 326.4893        |
|         | 2111.9410       | 1056.4741       | 704.6519        | 19 | T      | 8  | 848.4108        | 424.7091        | 283.4751        |
|         | 2208.9938       | 1105.0005       | 737.0028        | 20 | P      | 7  | 747.3632        | 374.1852        | 249.7926        |
|         | 2310.0414       | 1155.5244       | 770.6853        | 21 | T      | 6  | 650.3104        | 325.6588        | 217.4417        |
|         | 2397.0735       | 1199.0404       | 799.6960        | 22 | S      | 5  | 549.2627        | 275.1350        | 183.7591        |
|         | 2484.1055       | 1242.5564       | 828.7067        | 23 | S      | 4  | 462.2307        | 231.6190        | 154.7484        |
|         | 2598.1484       | 1299.5779       | 866.7210        | 24 | N      | 3  | 375.1987        | 188.1030        | 125.7377        |
|         | 2712.1914       | 1356.5993       | 904.7353        | 25 | N      | 2  | 261.1557        | 131.0815        | 87.7234         |
|         |                 |                 |                 | 26 | K      | 1  | 147.1128        | 74.0600         | 49.7091         |

# Annotated spectra from Saleem et. al. 2009

R.TSNDANGS<sub>167</sub>-S<sub>167</sub>-STIKR.-/3

0.7645

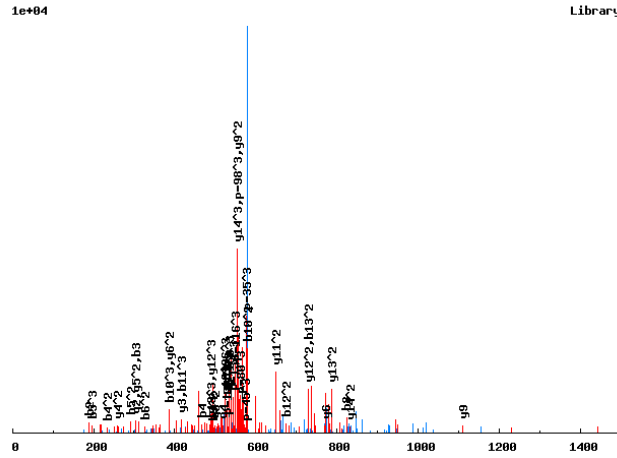

| Library | b <sup>1+</sup> | b <sup>2+</sup> | b <sup>3+</sup> | #  | AA     | #  | y <sup>1+</sup> | y <sup>2+</sup> | y <sup>3+</sup> |
|---------|-----------------|-----------------|-----------------|----|--------|----|-----------------|-----------------|-----------------|
|         | 102.0550        | 51.5311         | 34.6898         | 1  | T      | 15 |                 |                 |                 |
|         | 189.0870        | 95.0471         | 63.7005         | 2  | S      | 14 | 1659.6411       | 830.3242        | 553.8852        |
|         | 303.1299        | 152.0686        | 101.7148        | 3  | N      | 13 | 1572.6091       | 786.8082        | 524.8746        |
|         | 466.1932        | 233.6003        | 156.0693        | 4  | Y      | 12 | 1458.5662       | 729.7867        | 486.8602        |
|         | 581.2202        | 291.1137        | 194.4116        | 5  | D      | 11 | 1295.5028       | 648.2551        | 432.5058        |
|         | 652.2573        | 326.6323        | 218.0906        | 6  | A      | 10 | 1180.4759       | 590.7416        | 394.1635        |
|         | 766.3002        | 383.6538        | 256.1049        | 7  | N      | 9  | 1109.4388       | 555.2230        | 370.4845        |
|         | 823.3217        | 412.1645        | 275.1121        | 8  | G      | 8  | 995.3959        | 498.2016        | 332.4701        |
|         | 990.3201        | 495.6637        | 330.7782        | 9  | S[167] | 7  | 938.3744        | 469.6908        | 313.4630        |
|         | 1157.3184       | 579.1628        | 386.4443        | 10 | S[167] | 6  | 771.3760        | 386.1917        | 257.7969        |
|         | 1244.3504       | 622.6789        | 415.4550        | 11 | S      | 5  | 604.3777        | 302.6925        | 202.1307        |
|         | 1345.3981       | 673.2027        | 449.1376        | 12 | T      | 4  | 517.3456        | 259.1765        | 173.1201        |
|         | 1458.4822       | 729.7447        | 486.8322        | 13 | I      | 3  | 416.2980        | 208.6526        | 139.4375        |
|         | 1586.5771       | 793.7922        | 529.5306        | 14 | K      | 2  | 303.2139        | 152.1106        | 101.7428        |
|         |                 |                 |                 | 15 | R      | 1  | 175.1190        | 88.0631         | 59.0445         |

# Annotated spectra from Saleem et. al. 2009

K.TS<sub>167</sub>PSNS<sub>167</sub>PEAS<sub>167</sub>PSLAK.I/2

0.9777

1e+04

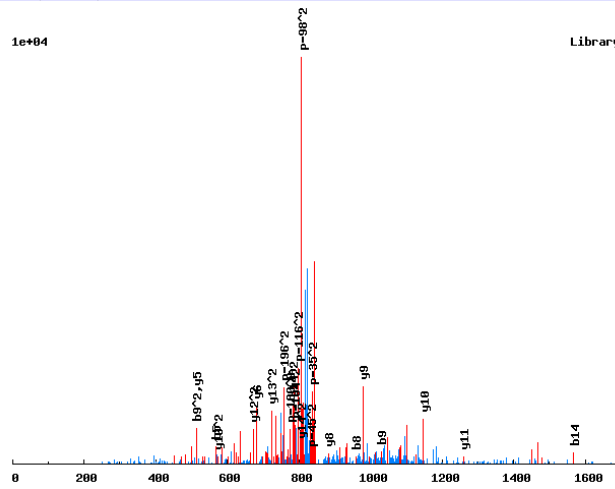

| Library | b <sup>1+</sup> | b <sup>2+</sup> | #  | AA     | #  | y <sup>1+</sup> | y <sup>2+</sup> |
|---------|-----------------|-----------------|----|--------|----|-----------------|-----------------|
|         | 102.0550        | 51.5311         | 1  | T      | 15 |                 |                 |
|         | 269.0533        | 135.0303        | 2  | S[167] | 14 | 1611.5740       | 806.2907        |
|         | 366.1061        | 183.5567        | 3  | P      | 13 | 1444.5757       | 722.7915        |
|         | 453.1381        | 227.0727        | 4  | S      | 12 | 1347.5229       | 674.2651        |
|         | 567.1810        | 284.0942        | 5  | N      | 11 | 1260.4909       | 630.7491        |
|         | 734.1794        | 367.5933        | 6  | S[167] | 10 | 1146.4479       | 573.7276        |
|         | 831.2322        | 416.1197        | 7  | P      | 9  | 979.4496        | 490.2284        |
|         | 960.2748        | 480.6410        | 8  | E      | 8  | 882.3968        | 441.7021        |
|         | 1031.3119       | 516.1596        | 9  | A      | 7  | 753.3542        | 377.1808        |
|         | 1198.3102       | 599.6588        | 10 | S[167] | 6  | 682.3171        | 341.6622        |
|         | 1295.3630       | 648.1851        | 11 | P      | 5  | 515.3188        | 258.1630        |
|         | 1382.3950       | 691.7011        | 12 | S      | 4  | 418.2660        | 209.6366        |
|         | 1495.4791       | 748.2432        | 13 | L      | 3  | 331.2340        | 166.1206        |
|         | 1566.5162       | 783.7617        | 14 | A      | 2  | 218.1499        | 109.5786        |
|         |                 |                 | 15 | K      | 1  | 147.1128        | 74.0600         |

# Annotated spectra from Saleem et. al. 2009

R.TSQGR<sub>166</sub>PVT<sub>181</sub>QNSISS<sub>167</sub>IGQGPLR<sub>166</sub>S/3

0.999

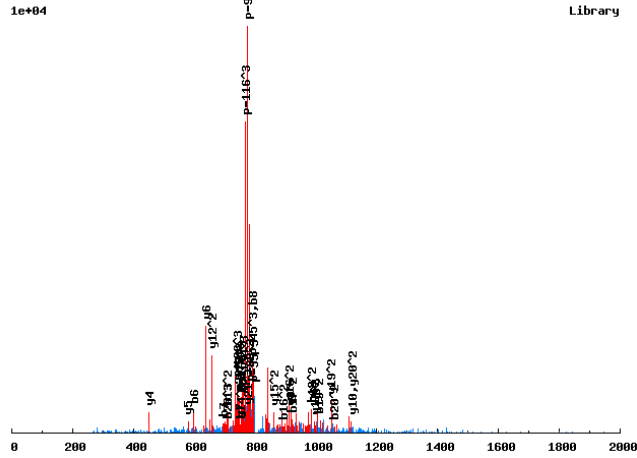

| Library | b <sup>1+</sup> | b <sup>2+</sup>  | b <sup>3+</sup> | #  | AA     | #  | y <sup>1+</sup>  | y <sup>2+</sup>  | y <sup>3+</sup> |
|---------|-----------------|------------------|-----------------|----|--------|----|------------------|------------------|-----------------|
|         | 102.0550        | 51.5311          | 34.6898         | 1  | T      | 22 |                  |                  |                 |
|         | 189.0870        | 95.0471          | 63.7005         | 2  | S      | 21 | 2319.0757        | 1160.0415        | <b>773.6967</b> |
|         | 317.1456        | 159.0764         | 106.3867        | 3  | Q      | 20 | 2232.0436        | <b>1116.5255</b> | <b>744.6861</b> |
|         | 374.1670        | 187.5872         | 125.3939        | 4  | G      | 19 | 2103.9851        | <b>1052.4962</b> | 701.9999        |
|         | 431.1885        | 216.0979         | 144.4010        | 5  | G      | 18 | 2046.9636        | 1023.9854        | 682.9927        |
|         | <b>597.2979</b> | 299.1526         | 199.7708        | 6  | R[166] | 17 | 1989.9421        | <b>995.4747</b>  | 663.9856        |
|         | <b>694.3506</b> | 347.6790         | 232.1217        | 7  | P      | 16 | 1823.8328        | <b>912.4200</b>  | 608.6158        |
|         | <b>793.4190</b> | 397.2132         | 265.1445        | 8  | V      | 15 | 1726.7800        | <b>863.8936</b>  | 576.2649        |
|         | 974.4331        | 487.7202         | 325.4825        | 9  | T[181] | 14 | 1627.7116        | 814.3594         | 543.2421        |
|         | 1102.4916       | 551.7495         | 368.1687        | 10 | Q      | 13 | 1446.6976        | 723.8524         | 482.9041        |
|         | 1216.5346       | 608.7709         | 406.1830        | 11 | N      | 12 | 1318.6390        | <b>659.8231</b>  | 440.2179        |
|         | 1303.5666       | 652.2869         | 435.1937        | 12 | S      | 11 | 1204.5961        | 602.8017         | 402.2035        |
|         | 1416.6507       | <b>708.8290</b>  | 472.8884        | 13 | I      | 10 | <b>1117.5641</b> | 559.2857         | 373.1929        |
|         | 1503.6827       | <b>752.3450</b>  | 501.8991        | 14 | S      | 9  | <b>1004.4800</b> | 502.7436         | 335.4982        |
|         | 1670.6810       | 835.8442         | 557.5652        | 15 | S[167] | 8  | <b>917.4480</b>  | 459.2276         | 306.4875        |
|         | 1783.7651       | <b>892.3862</b>  | 595.2599        | 16 | I      | 7  | <b>750.4496</b>  | 375.7284         | 250.8214        |
|         | 1840.7866       | <b>920.8969</b>  | 614.2670        | 17 | G      | 6  | <b>637.3655</b>  | 319.1864         | 213.1267        |
|         | 1968.8451       | <b>984.9262</b>  | 656.9532        | 18 | Q      | 5  | <b>580.3441</b>  | 290.6757         | 194.1195        |
|         | 2025.8666       | <b>1013.4369</b> | 675.9604        | 19 | G      | 4  | <b>452.2855</b>  | 226.6464         | 151.4334        |
|         | 2122.9194       | <b>1061.9633</b> | <b>708.3113</b> | 20 | P      | 3  | 395.2640         | 198.1357         | 132.4262        |
|         | 2236.0034       | 1118.5054        | 746.0060        | 21 | L      | 2  | 298.2113         | 149.6093         | 100.0753        |
|         |                 |                  |                 | 22 | R[166] | 1  | 185.1272         | 93.0672          | 62.3806         |

# Annotated spectra from Saleem et. al. 2009

R.TSSAS<sub>167</sub>SAS<sub>167</sub>LEGTK.L/2

0.8561

1e+04

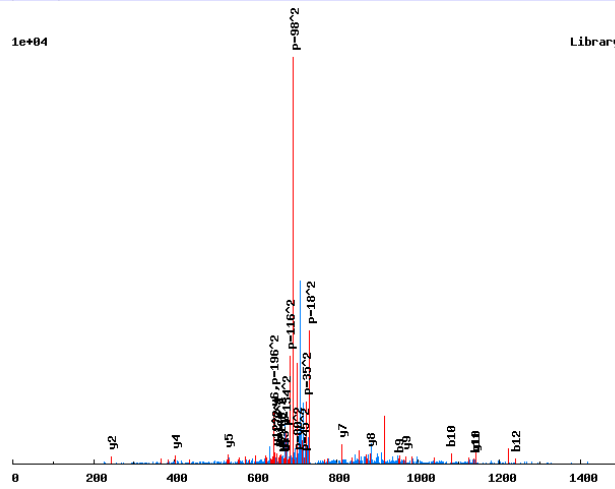

| Library | b <sup>1+</sup> | b <sup>2+</sup> | #  | AA     | #  | y <sup>1+</sup> | y <sup>2+</sup> |
|---------|-----------------|-----------------|----|--------|----|-----------------|-----------------|
|         | 102.0550        | 51.5311         | 1  | T      | 14 |                 |                 |
|         | 189.0870        | 95.0471         | 2  | S      | 13 | 1381.5284       | 691.2678        |
|         | 276.1190        | 138.5631        | 3  | S      | 12 | 1294.4964       | 647.7518        |
|         | 347.1561        | 174.0817        | 4  | A      | 11 | 1207.4643       | 604.2358        |
|         | 514.1545        | 257.5809        | 5  | S[167] | 10 | 1136.4272       | 568.7172        |
|         | 601.1865        | 301.0969        | 6  | S      | 9  | 969.4289        | 485.2181        |
|         | 672.2236        | 336.6155        | 7  | A      | 8  | 882.3968        | 441.7021        |
|         | 839.2220        | 420.1146        | 8  | S[167] | 7  | 811.3597        | 406.1835        |
|         | 952.3061        | 476.6567        | 9  | L      | 6  | 644.3614        | 322.6843        |
|         | 1081.3486       | 541.1780        | 10 | E      | 5  | 531.2773        | 266.1423        |
|         | 1138.3701       | 569.6887        | 11 | G      | 4  | 402.2347        | 201.6210        |
|         | 1239.4178       | 620.2125        | 12 | T      | 3  | 345.2132        | 173.1103        |
|         | 1336.4705       | 668.7389        | 13 | P      | 2  | 244.1656        | 122.5864        |
|         |                 |                 | 14 | K      | 1  | 147.1128        | 74.0600         |

# Annotated spectra from Saleem et. al. 2009

R.T.<sub>181</sub>SSAS<sub>167</sub>SAS<sub>167</sub>LEGTPK.L/2

0.7001

1e+04

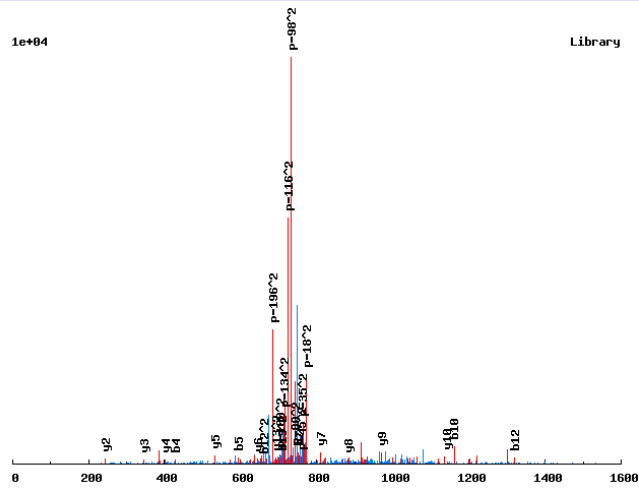

| Library | b <sup>1+</sup> | b <sup>2+</sup> | #  | AA | #     | y <sup>1+</sup> | y <sup>2+</sup> |
|---------|-----------------|-----------------|----|----|-------|-----------------|-----------------|
|         | 182.0213        | 91.5143         | 1  | T  | [181] | 14              |                 |
|         | 269.0533        | 135.0303        | 2  | S  | 13    | 1381.5284       | 691.2678        |
|         | 356.0854        | 178.5463        | 3  | S  | 12    | 1294.4964       | 647.7518        |
|         | 427.1225        | 214.0649        | 4  | A  | 11    | 1207.4643       | 604.2358        |
|         | 594.1208        | 297.5641        | 5  | S  | [167] | 10              | 1136.4272       |
|         | 681.1529        | 341.0801        | 6  | S  | 9     | 969.4289        | 485.2181        |
|         | 752.1900        | 376.5986        | 7  | A  | 8     | 882.3968        | 441.7021        |
|         | 919.1883        | 460.0978        | 8  | S  | [167] | 7               | 811.3597        |
|         | 1032.2724       | 516.6398        | 9  | L  | 6     | 644.3614        | 322.6843        |
|         | 1161.3150       | 581.1611        | 10 | E  | 5     | 531.2773        | 266.1423        |
|         | 1218.3364       | 609.6719        | 11 | G  | 4     | 402.2347        | 201.6210        |
|         | 1319.3841       | 660.1957        | 12 | T  | 3     | 345.2132        | 173.1103        |
|         | 1416.4369       | 708.7221        | 13 | P  | 2     | 244.1656        | 122.5864        |
|         |                 |                 | 14 | K  | 1     | 147.1128        | 74.0600         |

# Annotated spectra from Saleem et. al. 2009

K.TSS<sub>167</sub>DLGIFGHR.Y/2

0.9228

1e+04

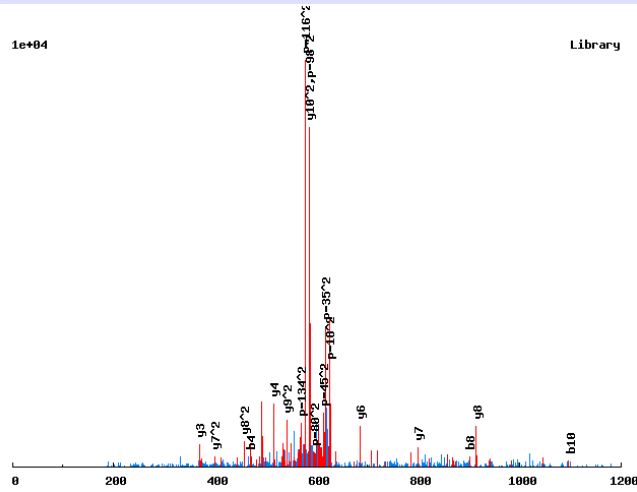

| Library | b <sup>1+</sup> | b <sup>2+</sup> | #  | AA     | #  | y <sup>1+</sup> | y <sup>2+</sup> |
|---------|-----------------|-----------------|----|--------|----|-----------------|-----------------|
|         | 102.0550        | 51.5311         | 1  | T      | 11 |                 |                 |
|         | 189.0870        | 95.0471         | 2  | S      | 10 | 1168.5146       | 584.7610        |
|         | 356.0854        | 178.5463        | 3  | S[167] | 9  | 1081.4826       | 541.2449        |
|         | 471.1123        | 236.0598        | 4  | D      | 8  | 914.4843        | 457.7458        |
|         | 584.1964        | 292.6018        | 5  | L      | 7  | 799.4573        | 400.2323        |
|         | 641.2178        | 321.1125        | 6  | G      | 6  | 686.3732        | 343.6903        |
|         | 754.3019        | 377.6546        | 7  | I      | 5  | 629.3518        | 315.1795        |
|         | 901.3703        | 451.1888        | 8  | F      | 4  | 516.2677        | 258.6375        |
|         | 958.3917        | 479.6995        | 9  | G      | 3  | 369.1993        | 185.1033        |
|         | 1095.4507       | 548.2290        | 10 | H      | 2  | 312.1779        | 156.5926        |
|         |                 |                 | 11 | R      | 1  | 175.1190        | 88.0631         |



# Annotated spectra from Saleem et. al. 2009

R.TSS<sub>167</sub>QLS<sub>167</sub>FPNIPEDPQR<sub>166</sub>N/2

0.9999

1e+04

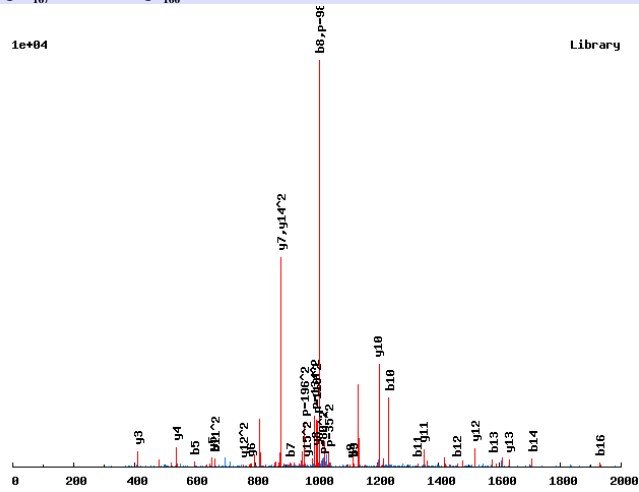

Library

| b <sup>1+</sup> | b <sup>2+</sup> | #  | AA     | #  | y <sup>1+</sup> | y <sup>2+</sup> |
|-----------------|-----------------|----|--------|----|-----------------|-----------------|
| 102.0550        | 51.5311         | 1  | T      | 17 |                 |                 |
| 189.0870        | 95.0471         | 2  | S      | 16 | 2013.8230       | 1007.4151       |
| 356.0854        | 178.5463        | 3  | S[167] | 15 | 1926.7910       | 963.8991        |
| 484.1439        | 242.5756        | 4  | Q      | 14 | 1759.7926       | 880.3999        |
| 597.2280        | 299.1176        | 5  | L      | 13 | 1631.7340       | 816.3706        |
| 764.2264        | 382.6168        | 6  | S[167] | 12 | 1518.6500       | 759.8286        |
| 911.2948        | 456.1510        | 7  | F      | 11 | 1351.6516       | 676.3294        |
| 1008.3475       | 504.6774        | 8  | P      | 10 | 1204.5832       | 602.7952        |
| 1122.3905       | 561.6989        | 9  | N      | 9  | 1107.5304       | 554.2689        |
| 1235.4745       | 618.2409        | 10 | I      | 8  | 993.4875        | 497.2474        |
| 1332.5273       | 666.7673        | 11 | P      | 7  | 880.4034        | 440.7054        |
| 1461.5699       | 731.2886        | 12 | E      | 6  | 783.3507        | 392.1790        |
| 1576.5968       | 788.8020        | 13 | D      | 5  | 654.3081        | 327.6577        |
| 1705.6394       | 853.3233        | 14 | E      | 4  | 539.2811        | 270.1442        |
| 1802.6922       | 901.8497        | 15 | P      | 3  | 410.2386        | 205.6229        |
| 1930.7507       | 965.8790        | 16 | Q      | 2  | 313.1858        | 157.0965        |
|                 |                 | 17 | R[166] | 1  | 185.1272        | 93.0672         |

# Annotated spectra from Saleem et. al. 2009

R.T.<sub>181</sub>SSSSS<sub>167</sub>LQQATSR.L/2

0.6386

1e+04

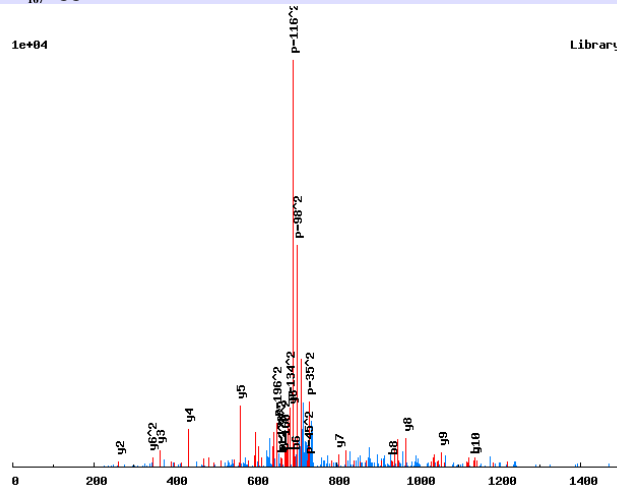

| Library | b <sup>1+</sup> | b <sup>2+</sup> | #  | AA | #     | y <sup>1+</sup> | y <sup>2+</sup> |          |
|---------|-----------------|-----------------|----|----|-------|-----------------|-----------------|----------|
|         | 182.0213        | 91.5143         | 1  | T  | [181] | 13              |                 |          |
|         | 269.0533        | 135.0303        | 2  | S  | 12    | 1318.5635       | 659.7854        |          |
|         | 356.0854        | 178.5463        | 3  | S  | 11    | 1231.5314       | 616.2694        |          |
|         | 443.1174        | 222.0623        | 4  | S  | 10    | 1144.4994       | 572.7533        |          |
|         | 530.1494        | 265.5783        | 5  | S  | 9     | 1057.4674       | 529.2373        |          |
|         | 697.1478        | 349.0775        | 6  | S  | [167] | 8               | 970.4354        | 485.7213 |
|         | 810.2318        | 405.6196        | 7  | L  | 7     | 803.4370        | 402.2221        |          |
|         | 938.2904        | 469.6488        | 8  | Q  | 6     | 690.3529        | 345.6801        |          |
|         | 1066.3490       | 533.6781        | 9  | Q  | 5     | 562.2944        | 281.6508        |          |
|         | 1137.3861       | 569.1967        | 10 | A  | 4     | 434.2358        | 217.6215        |          |
|         | 1238.4338       | 619.7205        | 11 | T  | 3     | 363.1987        | 182.1030        |          |
|         | 1325.4658       | 663.2365        | 12 | S  | 2     | 262.1510        | 131.5791        |          |
|         |                 |                 | 13 | R  | 1     | 175.1190        | 88.0631         |          |

# Annotated spectra from Saleem et. al. 2009

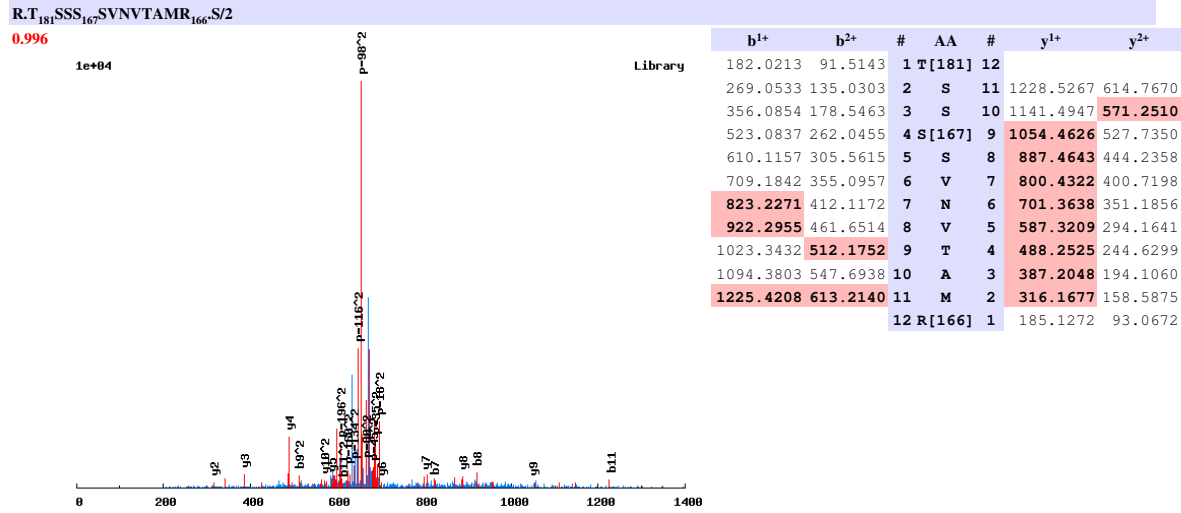

# Annotated spectra from Saleem et. al. 2009

R.TSS<sub>167</sub>T<sub>181</sub>SSHYNNINADLHAR<sub>166</sub>V/3

0.9994

1e+04

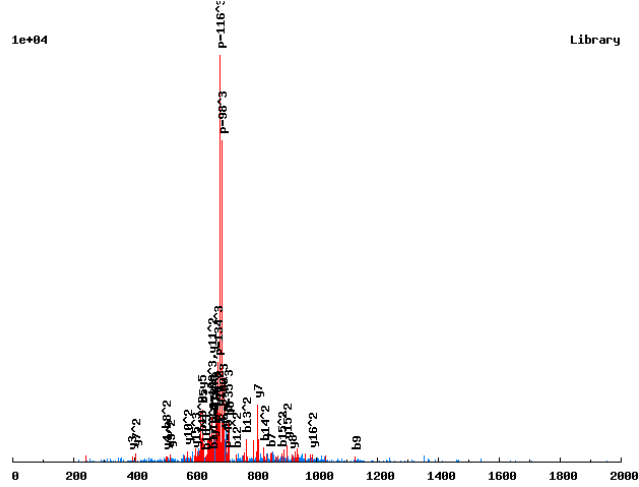

| Library | b <sup>1+</sup> | b <sup>2+</sup> | b <sup>3+</sup> | #  | AA     | #  | y <sup>1+</sup> | y <sup>2+</sup> | y <sup>3+</sup> |
|---------|-----------------|-----------------|-----------------|----|--------|----|-----------------|-----------------|-----------------|
|         | 102.0550        | 51.5311         | 34.6898         | 1  | T      | 18 |                 |                 |                 |
|         | 189.0870        | 95.0471         | 63.7005         | 2  | S      | 17 | 2056.8149       | 1028.9111       | 686.2765        |
|         | 356.0854        | 178.5463        | 119.3666        | 3  | S[167] | 16 | 1969.7829       | 985.3951        | 657.2658        |
|         | 537.0994        | 269.0533        | 179.7046        | 4  | T[181] | 15 | 1802.7845       | 901.8959        | 601.5997        |
|         | 624.1314        | 312.5693        | 208.7153        | 5  | S      | 14 | 1621.7705       | 811.3889        | 541.2617        |
|         | 711.1634        | 356.0854        | 237.7260        | 6  | S      | 13 | 1534.7385       | 767.8729        | 512.2510        |
|         | 848.2223        | 424.6148        | 283.4123        | 7  | H      | 12 | 1447.7064       | 724.3569        | 483.2403        |
|         | 1011.2857       | 506.1465        | 337.7667        | 8  | Y      | 11 | 1310.6475       | 655.8274        | 437.5540        |
|         | 1125.3286       | 563.1679        | 375.7811        | 9  | N      | 10 | 1147.5842       | 574.2957        | 383.1996        |
|         | 1239.3715       | 620.1894        | 413.7954        | 10 | N      | 9  | 1033.5413       | 517.2743        | 345.1853        |
|         | 1352.4556       | 676.7314        | 451.4900        | 11 | I      | 8  | 919.4983        | 460.2528        | 307.1710        |
|         | 1466.4985       | 733.7529        | 489.5044        | 12 | N      | 7  | 806.4143        | 403.7108        | 269.4763        |
|         | 1537.5356       | 769.2715        | 513.1834        | 13 | A      | 6  | 692.3713        | 346.6893        | 231.4620        |
|         | 1652.5626       | 826.7849        | 551.5257        | 14 | D      | 5  | 621.3342        | 311.1708        | 207.7829        |
|         | 1765.6466       | 883.3270        | 589.2204        | 15 | L      | 4  | 506.3073        | 253.6573        | 169.4406        |
|         | 1902.7055       | 951.8564        | 634.9067        | 16 | H      | 3  | 393.2232        | 197.1153        | 131.7459        |
|         | 1973.7426       | 987.3750        | 658.5857        | 17 | A      | 2  | 256.1643        | 128.5858        | 86.0596         |
|         |                 |                 |                 | 18 | R[166] | 1  | 185.1272        | 93.0672         | 62.3806         |

# Annotated spectra from Saleem et. al. 2009

K.TST<sub>181</sub>PTTM<sub>147</sub>LS<sub>167</sub>R.S/2

0.9025

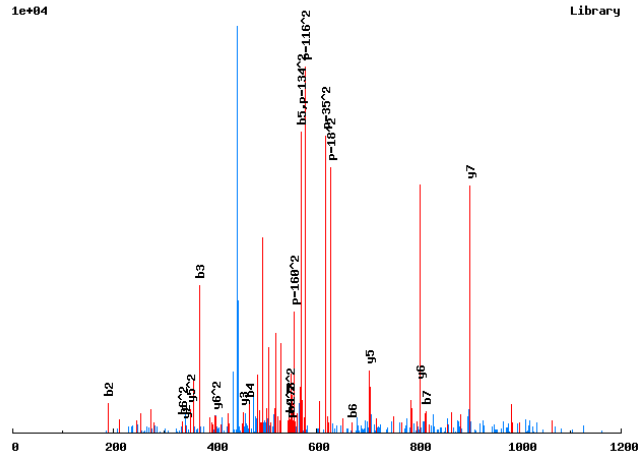

| Library | b <sup>1+</sup> | b <sup>2+</sup> | #  | AA     | #  | y <sup>1+</sup> | y <sup>2+</sup> |
|---------|-----------------|-----------------|----|--------|----|-----------------|-----------------|
|         | 102.0550        | 51.5311         | 1  | T      | 10 |                 |                 |
|         | 189.0870        | 95.0471         | 2  | S      | 9  | 1169.4309       | 585.2191        |
|         | 370.1010        | 185.5541        | 3  | T[181] | 8  | 1082.3989       | 541.7031        |
|         | 467.1538        | 234.0805        | 4  | P      | 7  | 901.3849        | 451.1961        |
|         | 568.2014        | 284.6044        | 5  | T      | 6  | 804.3321        | 402.6697        |
|         | 669.2491        | 335.1282        | 6  | T      | 5  | 703.2845        | 352.1459        |
|         | 816.2845        | 408.6459        | 7  | M[147] | 4  | 602.2368        | 301.6220        |
|         | 929.3686        | 465.1879        | 8  | L      | 3  | 455.2014        | 228.1043        |
|         | 1096.3669       | 548.6871        | 9  | S[167] | 2  | 342.1173        | 171.5623        |
|         |                 |                 | 10 | R      | 1  | 175.1190        | 88.0631         |

# Annotated spectra from Saleem et. al. 2009

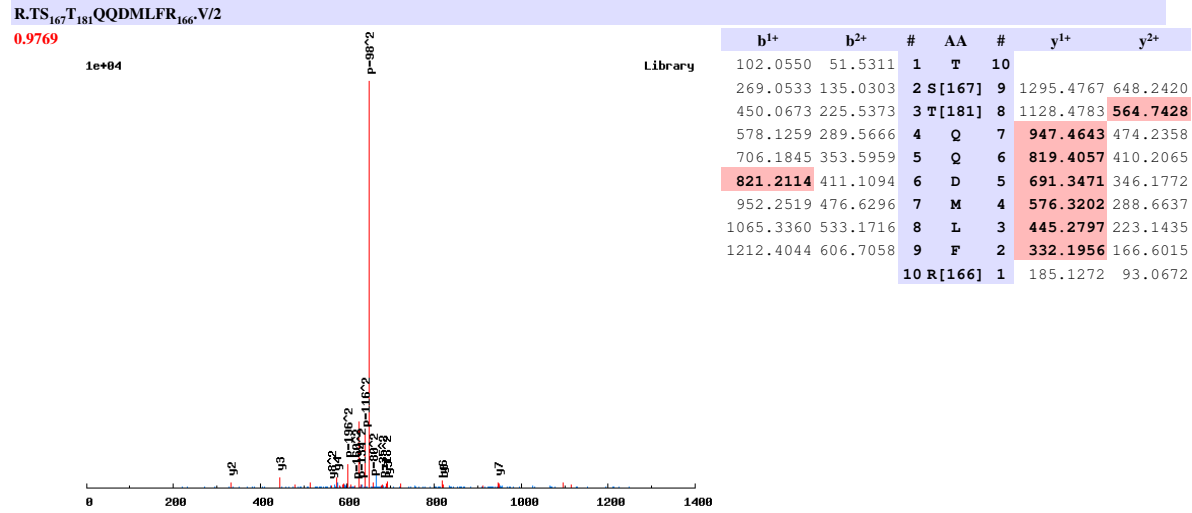

# Annotated spectra from Saleem et. al. 2009

R.T.<sub>181</sub>TDQS<sub>167</sub>GGSKS<sub>167</sub>GVVPTDEQKEEK.S/3

0.7695

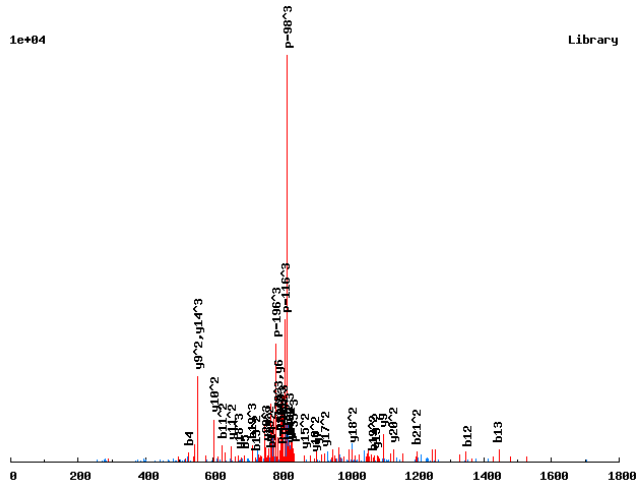

| Library | b <sup>1+</sup> | b <sup>2+</sup> | b <sup>3+</sup> | #  | AA      | #  | y <sup>1+</sup> | y <sup>2+</sup> | y <sup>3+</sup> |
|---------|-----------------|-----------------|-----------------|----|---------|----|-----------------|-----------------|-----------------|
|         | 182.0213        | 91.5143         | 61.3453         | 1  | T [181] | 22 |                 |                 |                 |
|         | 283.0690        | 142.0381        | 95.0278         | 2  | T       | 21 | 2365.9796       | 1183.4934       | 789.3314        |
|         | 398.0959        | 199.5516        | 133.3702        | 3  | D       | 20 | 2264.9319       | 1132.9696       | 755.6488        |
|         | 526.1545        | 263.5809        | 176.0564        | 4  | Q       | 19 | 2149.9050       | 1075.4561       | 717.3065        |
|         | 693.1529        | 347.0801        | 231.7225        | 5  | S [167] | 18 | 2021.8464       | 1011.4268       | 674.6203        |
|         | 750.1743        | 375.5908        | 250.7296        | 6  | G       | 17 | 1854.8480       | 927.9277        | 618.9542        |
|         | 807.1958        | 404.1015        | 269.7368        | 7  | G       | 16 | 1797.8266       | 899.4169        | 599.9470        |
|         | 894.2278        | 447.6175        | 298.7475        | 8  | S       | 15 | 1740.8051       | 870.9062        | 580.9399        |
|         | 1022.3228       | 511.6650        | 341.4458        | 9  | K       | 14 | 1653.7731       | 827.3902        | 551.9292        |
|         | 1189.3211       | 595.1642        | 397.1119        | 10 | S [167] | 13 | 1525.6781       | 763.3427        | 509.2309        |
|         | 1246.3426       | 623.6749        | 416.1190        | 11 | G       | 12 | 1358.6798       | 679.8435        | 453.5648        |
|         | 1345.4110       | 673.2091        | 449.1419        | 12 | V       | 11 | 1301.6583       | 651.3328        | 434.5576        |
|         | 1444.4794       | 722.7433        | 482.1647        | 13 | V       | 10 | 1202.5899       | 601.7986        | 401.5348        |
|         | 1541.5322       | 771.2697        | 514.5156        | 14 | P       | 9  | 1103.5215       | 552.2644        | 368.5120        |
|         | 1642.5798       | 821.7936        | 548.1981        | 15 | T       | 8  | 1006.4687       | 503.7380        | 336.1611        |
|         | 1757.6068       | 879.3070        | 586.5404        | 16 | D       | 7  | 905.4211        | 453.2142        | 302.4785        |
|         | 1886.6494       | 943.8283        | 629.5546        | 17 | E       | 6  | 790.3941        | 395.7007        | 264.1362        |
|         | 2014.7080       | 1007.8576       | 672.2408        | 18 | Q       | 5  | 661.3515        | 331.1794        | 221.1220        |
|         | 2142.8029       | 1071.9051       | 714.9392        | 19 | K       | 4  | 533.2929        | 267.1501        | 178.4358        |
|         | 2271.8455       | 1136.4264       | 757.9534        | 20 | E       | 3  | 405.1980        | 203.1026        | 135.7375        |
|         | 2400.8881       | 1200.9477       | 800.9676        | 21 | E       | 2  | 276.1554        | 138.5813        | 92.7233         |
|         |                 |                 |                 | 22 | K       | 1  | 147.1128        | 74.0600         | 49.7091         |

# Annotated spectra from Saleem et. al. 2009

R.TTDQSGGS<sub>167</sub>K<sub>136</sub>S<sub>167</sub>GVPPTDEQK<sub>136</sub>E EK<sub>136</sub>S/3

0.9678

1e+04

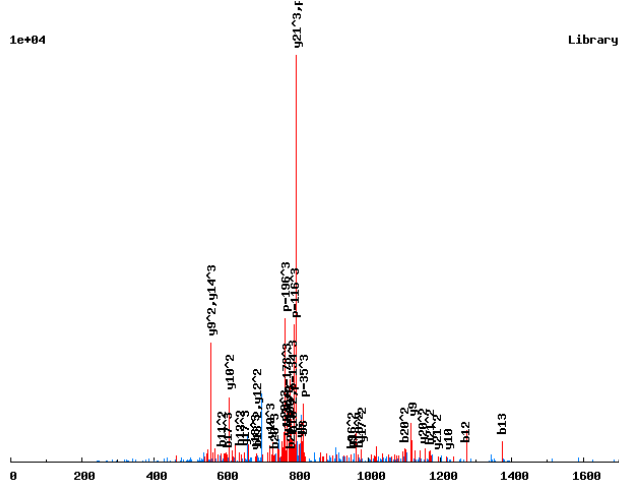

| Library | b <sup>1+</sup> | b <sup>2+</sup> | b <sup>3+</sup> | #  | AA     | #  | y <sup>1+</sup> | y <sup>2+</sup> | y <sup>3+</sup> |
|---------|-----------------|-----------------|-----------------|----|--------|----|-----------------|-----------------|-----------------|
|         | 102.0550        | 51.5311         | 34.6898         | 1  | T      | 22 |                 |                 |                 |
|         | 203.1026        | 102.0550        | 68.3724         | 2  | T      | 21 | 2390.0222       | 1195.5147       | 797.3456        |
|         | 318.1296        | 159.5684        | 106.7147        | 3  | D      | 20 | 2288.9745       | 1144.9909       | 763.6630        |
|         | 446.1882        | 223.5977        | 149.4009        | 4  | Q      | 19 | 2173.9476       | 1087.4774       | 725.3207        |
|         | 533.2202        | 267.1137        | 178.4116        | 5  | S      | 18 | 2045.8890       | 1023.4481       | 682.6345        |
|         | 590.2417        | 295.6245        | 197.4187        | 6  | G      | 17 | 1958.8570       | 979.9321        | 653.6238        |
|         | 647.2631        | 324.1352        | 216.4259        | 7  | G      | 16 | 1901.8355       | 951.4214        | 634.6167        |
|         | 814.2615        | 407.6344        | 272.0920        | 8  | S[167] | 15 | 1844.8140       | 922.9107        | 615.6095        |
|         | 950.3706        | 475.6890        | 317.4617        | 9  | K[136] | 14 | 1677.8157       | 839.4115        | 559.9434        |
|         | 1117.3690       | 559.1881        | 373.1279        | 10 | S[167] | 13 | 1541.7065       | 771.3569        | 514.5737        |
|         | 1174.3905       | 587.6989        | 392.1350        | 11 | G      | 12 | 1374.7082       | 687.8577        | 458.9076        |
|         | 1273.4589       | 637.2331        | 425.1578        | 12 | V      | 11 | 1317.6867       | 659.3470        | 439.9004        |
|         | 1372.5273       | 686.7673        | 458.1806        | 13 | V      | 10 | 1218.6183       | 609.8128        | 406.8776        |
|         | 1469.5800       | 735.2937        | 490.5315        | 14 | P      | 9  | 1119.5499       | 560.2786        | 373.8548        |
|         | 1570.6277       | 785.8175        | 524.2141        | 15 | T      | 8  | 1022.4971       | 511.7522        | 341.5039        |
|         | 1685.6547       | 843.3310        | 562.5564        | 16 | D      | 7  | 921.4494        | 461.2284        | 307.8213        |
|         | 1814.6972       | 907.8523        | 605.5706        | 17 | E      | 6  | 806.4225        | 403.7149        | 269.4790        |
|         | 1942.7558       | 971.8816        | 648.2568        | 18 | Q      | 5  | 677.3799        | 339.1936        | 226.4648        |
|         | 2078.8650       | 1039.9361       | 693.6265        | 19 | K[136] | 4  | 549.3213        | 275.1643        | 183.7786        |
|         | 2207.9076       | 1104.4574       | 736.6407        | 20 | E      | 3  | 413.2122        | 207.1097        | 138.4089        |
|         | 2336.9502       | 1168.9787       | 779.6549        | 21 | E      | 2  | 284.1696        | 142.5884        | 95.3947         |
|         |                 |                 |                 | 22 | K[136] | 1  | 155.1270        | 78.0671         | 52.3805         |



# Annotated spectra from Saleem et. al. 2009

K.TTDV<sub>16</sub>DLNS<sub>167</sub>DGKKDNDTSAK.D/3

0.8656

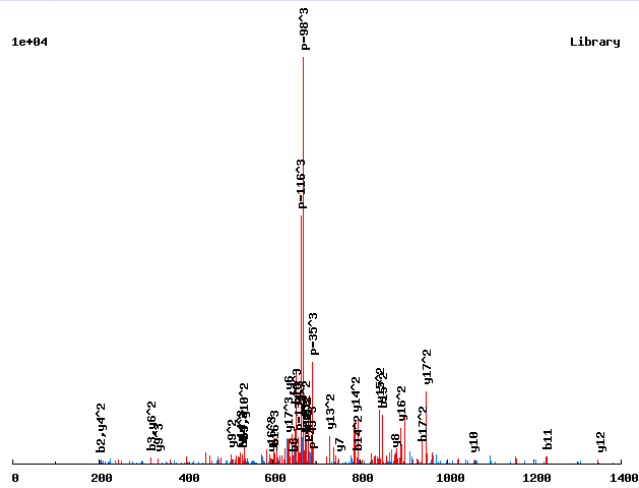

| Library | b <sup>1+</sup>  | b <sup>2+</sup> | b <sup>3+</sup> | #  | AA      | #  | y <sup>1+</sup>  | y <sup>2+</sup> | y <sup>3+</sup> |
|---------|------------------|-----------------|-----------------|----|---------|----|------------------|-----------------|-----------------|
|         | 102.0550         | 51.5311         | 34.6898         | 1  | T       | 19 |                  |                 |                 |
|         | <b>203.1026</b>  | 102.0550        | 68.3724         | 2  | T       | 18 | 2002.8601        | 1001.9337       | 668.2915        |
|         | <b>318.1296</b>  | 159.5684        | 106.7147        | 3  | D       | 17 | 1901.8124        | <b>951.4098</b> | <b>634.6090</b> |
|         | 417.1980         | 209.1026        | 139.7375        | 4  | V       | 16 | 1786.7855        | <b>893.8964</b> | <b>596.2667</b> |
|         | <b>532.2249</b>  | 266.6161        | 178.0798        | 5  | D       | 15 | 1687.7170        | <b>844.3622</b> | 563.2439        |
|         | <b>645.3090</b>  | 323.1581        | 215.7745        | 6  | L       | 14 | 1572.6901        | <b>786.8487</b> | <b>524.9016</b> |
|         | 759.3519         | 380.1796        | 253.7888        | 7  | N       | 13 | 1459.6060        | <b>730.3067</b> | 487.2069        |
|         | 926.3503         | 463.6788        | 309.4549        | 8  | S [167] | 12 | <b>1345.5631</b> | <b>673.2852</b> | 449.1926        |
|         | 1041.3772        | 521.1923        | 347.7973        | 9  | D       | 11 | 1178.5647        | 589.7860        | 393.5264        |
|         | 1098.3987        | 549.7030        | 366.8044        | 10 | G       | 10 | <b>1063.5378</b> | <b>532.2725</b> | 355.1841        |
|         | <b>1226.4936</b> | 613.7505        | 409.5027        | 11 | K       | 9  | 1006.5164        | <b>503.7618</b> | <b>336.1770</b> |
|         | 1354.5886        | <b>677.7979</b> | 452.2011        | 12 | K       | 8  | <b>878.4214</b>  | 439.7143        | 293.4787        |
|         | 1469.6155        | 735.3114        | 490.5434        | 13 | D       | 7  | <b>750.3264</b>  | 375.6669        | 250.7803        |
|         | 1583.6585        | <b>792.3329</b> | <b>528.5577</b> | 14 | N       | 6  | <b>635.2995</b>  | <b>318.1534</b> | 212.4380        |
|         | 1698.6854        | <b>849.8463</b> | 566.9000        | 15 | D       | 5  | 521.2566         | 261.1319        | 174.4237        |
|         | 1799.7331        | 900.3702        | <b>600.5826</b> | 16 | T       | 4  | 406.2296         | <b>203.6184</b> | 136.0814        |
|         | 1886.7651        | <b>943.8862</b> | 629.5932        | 17 | S       | 3  | 305.1819         | 153.0946        | 102.3988        |
|         | 1957.8022        | 979.4048        | <b>653.2723</b> | 18 | A       | 2  | 218.1499         | 109.5786        | 73.3882         |
|         |                  |                 |                 | 19 | K       | 1  | 147.1128         | 74.0600         | 49.7091         |

# Annotated spectra from Saleem et. al. 2009

K.T<sub>181</sub>T<sub>181</sub>ES<sub>167</sub>S<sub>167</sub>S<sub>167</sub>S<sub>167</sub>S<sub>167</sub>AAK<sub>136</sub>E/2

0.6149

1e+04

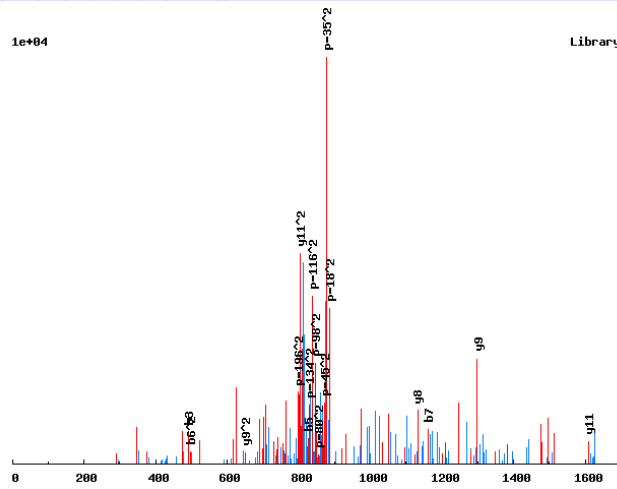

| Library | b <sup>1+</sup> | b <sup>2+</sup> | #  | AA     | #  | y <sup>1+</sup> | y <sup>2+</sup> |
|---------|-----------------|-----------------|----|--------|----|-----------------|-----------------|
|         | 182.0213        | 91.5143         | 1  | T[181] | 12 |                 |                 |
|         | 363.0353        | 182.0213        | 2  | T[181] | 11 | 1609.2480       | 805.1276        |
|         | 492.0779        | 246.5426        | 3  | E      | 10 | 1428.2340       | 714.6206        |
|         | 659.0763        | 330.0418        | 4  | S[167] | 9  | 1299.1914       | 650.0993        |
|         | 826.0746        | 413.5409        | 5  | S[167] | 8  | 1132.1930       | 566.6002        |
|         | 993.0730        | 497.0401        | 6  | S[167] | 7  | 965.1947        | 483.1010        |
|         | 1160.0713       | 580.5393        | 7  | S[167] | 6  | 798.1963        | 399.6018        |
|         | 1327.0697       | 664.0385        | 8  | S[167] | 5  | 631.1979        | 316.1026        |
|         | 1494.0681       | 747.5377        | 9  | S[167] | 4  | 464.1996        | 232.6034        |
|         | 1565.1052       | 783.0562        | 10 | A      | 3  | 297.2012        | 149.1042        |
|         | 1636.1423       | 818.5748        | 11 | A      | 2  | 226.1641        | 113.5857        |
|         |                 |                 | 12 | K[136] | 1  | 155.1270        | 78.0671         |

# Annotated spectra from Saleem et. al. 2009

K.TTNS<sub>167</sub>PMSILS<sub>167</sub>R.N/2

0.9898

1e+04

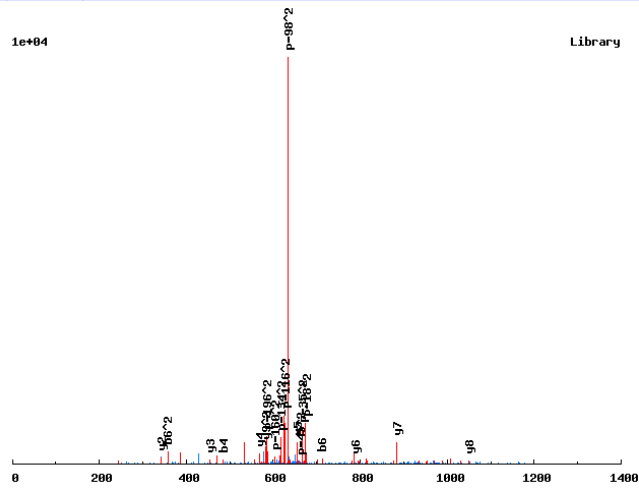

| Library | b <sup>1+</sup> | b <sup>2+</sup> | #  | AA      | #  | y <sup>1+</sup> | y <sup>2+</sup> |
|---------|-----------------|-----------------|----|---------|----|-----------------|-----------------|
|         | 102.0550        | 51.5311         | 1  | T       | 11 |                 |                 |
|         | 203.1026        | 102.0550        | 2  | T       | 10 | 1265.4997       | 633.2535        |
|         | 317.1456        | 159.0764        | 3  | N       | 9  | 1164.4520       | 582.7296        |
|         | 484.1439        | 242.5756        | 4  | S [167] | 8  | 1050.4091       | 525.7082        |
|         | 581.1967        | 291.1020        | 5  | P       | 7  | 883.4107        | 442.2090        |
|         | 712.2372        | 356.6222        | 6  | M       | 6  | 786.3580        | 393.6826        |
|         | 799.2692        | 400.1382        | 7  | S       | 5  | 655.3175        | 328.1624        |
|         | 912.3533        | 456.6803        | 8  | I       | 4  | 568.2854        | 284.6464        |
|         | 1025.4373       | 513.2223        | 9  | L       | 3  | 455.2014        | 228.1043        |
|         | 1192.4357       | 596.7215        | 10 | S [167] | 2  | 342.1173        | 171.5623        |
|         |                 |                 | 11 | R       | 1  | 175.1190        | 88.0631         |

# Annotated spectra from Saleem et. al. 2009

R.TTPLS<sub>167</sub>-ANSTGVSS<sub>167</sub>-LTR.H/2

0.9994

1e+04

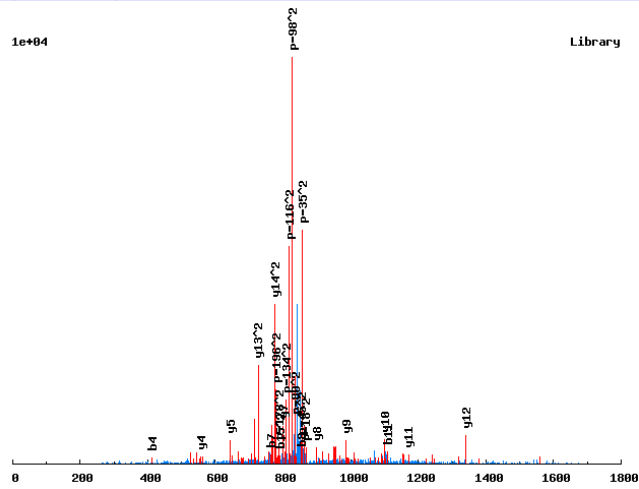

| Library | b <sup>1+</sup> | b <sup>2+</sup> | #  | AA     | #  | y <sup>1+</sup> | y <sup>2+</sup> |
|---------|-----------------|-----------------|----|--------|----|-----------------|-----------------|
|         | 102.0550        | 51.5311         | 1  | T      | 16 |                 |                 |
|         | 203.1026        | 102.0550        | 2  | T      | 15 | 1650.7136       | 825.8604        |
|         | 300.1554        | 150.5813        | 3  | P      | 14 | 1549.6659       | 775.3366        |
|         | 413.2395        | 207.1234        | 4  | L      | 13 | 1452.6131       | 726.8102        |
|         | 580.2378        | 290.6226        | 5  | S[167] | 12 | 1339.5291       | 670.2682        |
|         | 651.2749        | 326.1411        | 6  | A      | 11 | 1172.5307       | 586.7690        |
|         | 765.3179        | 383.1626        | 7  | N      | 10 | 1101.4936       | 551.2504        |
|         | 852.3499        | 426.6786        | 8  | S      | 9  | 987.4507        | 494.2290        |
|         | 953.3976        | 477.2024        | 9  | T      | 8  | 900.4186        | 450.7130        |
|         | 1010.4190       | 505.7132        | 10 | G      | 7  | 799.3710        | 400.1891        |
|         | 1109.4874       | 555.2474        | 11 | V      | 6  | 742.3495        | 371.6784        |
|         | 1196.5195       | 598.7634        | 12 | S      | 5  | 643.2811        | 322.1442        |
|         | 1363.5178       | 682.2626        | 13 | S[167] | 4  | 556.2491        | 278.6282        |
|         | 1476.6019       | 738.8046        | 14 | L      | 3  | 389.2507        | 195.1290        |
|         | 1577.6496       | 789.3284        | 15 | T      | 2  | 276.1666        | 138.5870        |
|         |                 |                 | 16 | R      | 1  | 175.1190        | 88.0631         |

# Annotated spectra from Saleem et. al. 2009

R.TTPLS<sub>167</sub>ANS<sub>167</sub>T<sub>181</sub>GVSSLTR<sub>166</sub>H/2

0.6284

1e+04

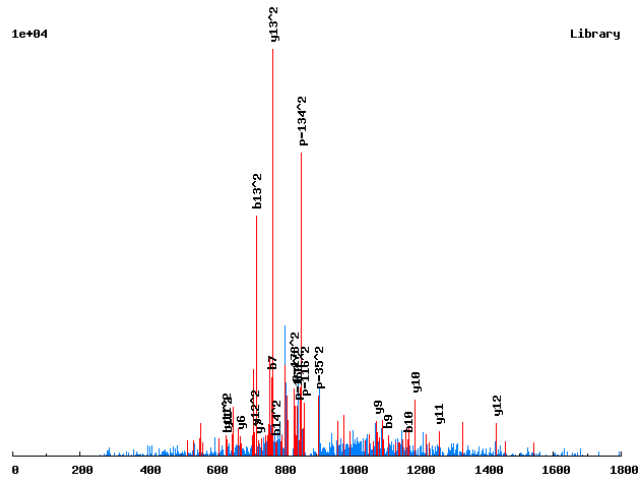

| Library | b <sup>1+</sup> | b <sup>2+</sup> | #  | AA     | #  | y <sup>1+</sup> | y <sup>2+</sup> |
|---------|-----------------|-----------------|----|--------|----|-----------------|-----------------|
|         | 102.0550        | 51.5311         | 1  | T      | 16 |                 |                 |
|         | 203.1026        | 102.0550        | 2  | T      | 15 | 1740.6882       | 870.8477        |
|         | 300.1554        | 150.5813        | 3  | P      | 14 | 1639.6405       | 820.3239        |
|         | 413.2395        | 207.1234        | 4  | L      | 13 | 1542.5877       | 771.7975        |
|         | 580.2378        | 290.6226        | 5  | S[167] | 12 | 1429.5037       | 715.2555        |
|         | 651.2749        | 326.1411        | 6  | A      | 11 | 1262.5053       | 631.7563        |
|         | 765.3179        | 383.1626        | 7  | N      | 10 | 1191.4682       | 596.2377        |
|         | 932.3162        | 466.6618        | 8  | S[167] | 9  | 1077.4253       | 539.2163        |
|         | 1113.3302       | 557.1688        | 9  | T[181] | 8  | 910.4269        | 455.7171        |
|         | 1170.3517       | 585.6795        | 10 | G      | 7  | 729.4129        | 365.2101        |
|         | 1269.4201       | 635.2137        | 11 | V      | 6  | 672.3914        | 336.6994        |
|         | 1356.4521       | 678.7297        | 12 | S      | 5  | 573.3230        | 287.1651        |
|         | 1443.4842       | 722.2457        | 13 | S      | 4  | 486.2910        | 243.6491        |
|         | 1556.5682       | 778.7878        | 14 | L      | 3  | 399.2590        | 200.1331        |
|         | 1657.6159       | 829.3116        | 15 | T      | 2  | 286.1749        | 143.5911        |
|         |                 |                 | 16 | R[166] | 1  | 185.1272        | 93.0672         |

Annotated spectra from Saleem et. al. 2009

K.T<sub>181</sub>TPPASVHS<sub>167</sub>AT<sub>181</sub>PDIKEDSNVAPQLDLLK.Q/3

0.9147

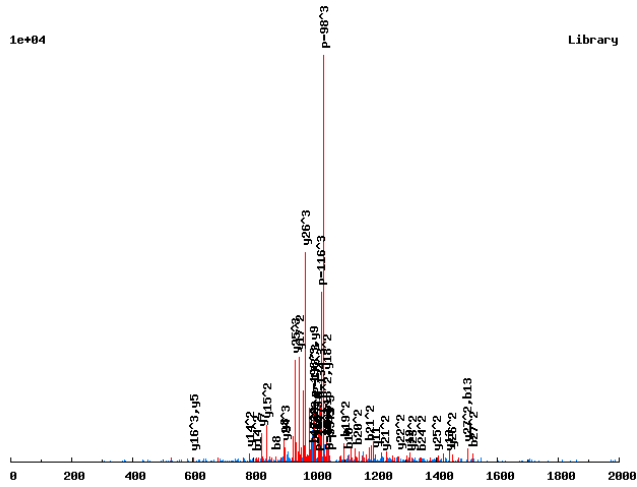

| Library | b <sup>1+</sup> | b <sup>2+</sup> | b <sup>3+</sup> | #  | AA | #        | y <sup>1+</sup> | y <sup>2+</sup> | y <sup>3+</sup> |
|---------|-----------------|-----------------|-----------------|----|----|----------|-----------------|-----------------|-----------------|
|         | 182.0213        | 91.5143         | 61.3453         | 1  | T  | [181] 28 |                 |                 |                 |
|         | 283.0690        | 142.0381        | 95.0278         | 2  | T  | 27       | 3003.4111       | 1502.2092       | 1001.8086       |
|         | 380.1217        | 190.5645        | 127.3788        | 3  | P  | 26       | 2902.3635       | 1451.6854       | 968.1260        |
|         | 477.1745        | 239.0909        | 159.7297        | 4  | P  | 25       | 2805.3107       | 1403.1590       | 935.7751        |
|         | 548.2116        | 274.6094        | 183.4087        | 5  | A  | 24       | 2708.2579       | 1354.6326       | 903.4242        |
|         | 635.2436        | 318.1255        | 212.4194        | 6  | S  | 23       | 2637.2208       | 1319.1141       | 879.7451        |
|         | 734.3120        | 367.6597        | 245.4422        | 7  | V  | 22       | 2550.1888       | 1275.5980       | 850.7345        |
|         | 871.3710        | 436.1891        | 291.1285        | 8  | H  | 21       | 2451.1204       | 1226.0638       | 817.7116        |
|         | 1038.3693       | 519.6883        | 346.7946        | 9  | S  | [167] 20 | 2314.0615       | 1157.5344       | 772.0253        |
|         | 1109.4064       | 555.2069        | 370.4737        | 10 | A  | 19       | 2147.0631       | 1074.0352       | 716.3592        |
|         | 1290.4          |                 |                 |    |    |          |                 |                 |                 |

# Annotated spectra from Saleem et. al. 2009

K.TT<sub>181</sub>PPAS<sub>167</sub>VHSATPDIK<sub>136</sub>EDSNVAPQLDLLK<sub>136</sub>Q/3

0.9987

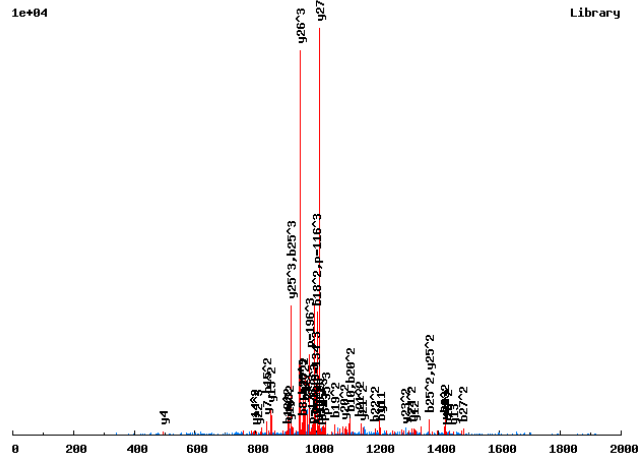

| Library | b <sup>1+</sup> | b <sup>2+</sup> | b <sup>3+</sup> | #  | AA     | #  | y <sup>1+</sup> | y <sup>2+</sup> | y <sup>3+</sup> |
|---------|-----------------|-----------------|-----------------|----|--------|----|-----------------|-----------------|-----------------|
|         | 102.0550        | 51.5311         | 34.6898         | 1  | T      | 28 |                 |                 |                 |
|         | 283.0690        | 142.0381        | 95.0278         | 2  | T[181] | 27 | 3019.4395       | 1510.2234       | 1007.1514       |
|         | 380.1217        | 190.5645        | 127.3788        | 3  | P      | 26 | 2838.4255       | 1419.7164       | 946.8134        |
|         | 477.1745        | 239.0909        | 159.7297        | 4  | P      | 25 | 2741.3728       | 1371.1900       | 914.4624        |
|         | 548.2116        | 274.6094        | 183.4087        | 5  | A      | 24 | 2644.3200       | 1322.6636       | 882.1115        |
|         | 715.2100        | 358.1086        | 239.0748        | 6  | S[167] | 23 | 2573.2829       | 1287.1451       | 858.4325        |
|         | 814.2784        | 407.6428        | 272.0976        | 7  | V      | 22 | 2406.2845       | 1203.6459       | 802.7664        |
|         | 951.3373        | 476.1723        | 317.7839        | 8  | H      | 21 | 2307.2161       | 1154.1117       | 769.7436        |
|         | 1038.3693       | 519.6883        | 346.7946        | 9  | S      | 20 | 2170.1572       | 1085.5822       | 724.0573        |
|         | 1109.4064       | 555.2069        | 370.4737        | 10 | A      | 19 | 2083.1252       | 1042.0662       | 695.0466        |
|         | 1210.4541       | 605.7307        | 404.1562        | 11 | T      | 18 | 2012.0881       | 1006.5477       | 671.3675        |
|         | 1307.5069       | 654.2571        | 436.5071        | 12 | P      | 17 | 1911.0404       | 956.0238        | 637.6850        |
|         | 1422.5338       | 711.7705        | 474.8495        | 13 | D      | 16 | 1813.9876       | 907.4975        | 605.3341        |
|         | 1535.6179       | 768.3126        | 512.5441        | 14 | I      | 15 | 1698.9607       | 849.9840        | 566.9917        |
|         | 1671.7270       | 836.3672        | 557.9139        | 15 | K[136] | 14 | 1585.8766       | 793.4420        | 529.2971        |
|         | 1800.7696       | 900.8884        | 600.9281        | 16 | E      | 13 | 1449.7675       | 725.3874        | 483.9273        |
|         | 1915.7966       | 958.4019        | 639.2704        | 17 | D      | 12 | 1320.7249       | 660.8661        | 440.9131        |
|         | 2002.8286       | 1001.9179       | 668.2810        | 18 | S      | 11 | 1205.6979       | 603.3526        | 402.5708        |
|         | 2116.8715       | 1058.9394       | 706.2954        | 19 | N      | 10 | 1118.6659       | 559.8366        | 373.5602        |
|         | 2215.9399       | 1108.4736       | 739.3182        | 20 | V      | 9  | 1004.6230       | 502.8151        | 335.5458        |
|         | 2286.9770       | 1143.9922       | 762.9972        | 21 | A      | 8  | 905.5546        | 453.2809        | 302.5230        |
|         | 2384.0298       | 1192.5185       | 795.3481        | 22 | P      | 7  | 834.5175        | 417.7624        | 278.8440        |
|         | 2512.0884       | 1256.5478       | 838.0343        | 23 | Q      | 6  | 737.4647        | 369.2360        | 246.4931        |
|         | 2625.1724       | 1313.0899       | 875.7290        | 24 | L      | 5  | 609.4061        | 305.2067        | 203.8069        |
|         | 2740.1994       | 1370.6033       | 914.0713        | 25 | D      | 4  | 496.3221        | 248.6647        | 166.1122        |
|         | 2853.2834       | 1427.1454       | 951.7660        | 26 | L      | 3  | 381.2951        | 191.1512        | 127.7699        |
|         | 2966.3675       | 1483.6874       | 989.4607        | 27 | L      | 2  | 268.2111        | 134.6092        | 90.0752         |
|         |                 |                 |                 | 28 | K[136] | 1  | 155.1270        | 78.0671         | 52.3805         |

# Annotated spectra from Saleem et. al. 2009

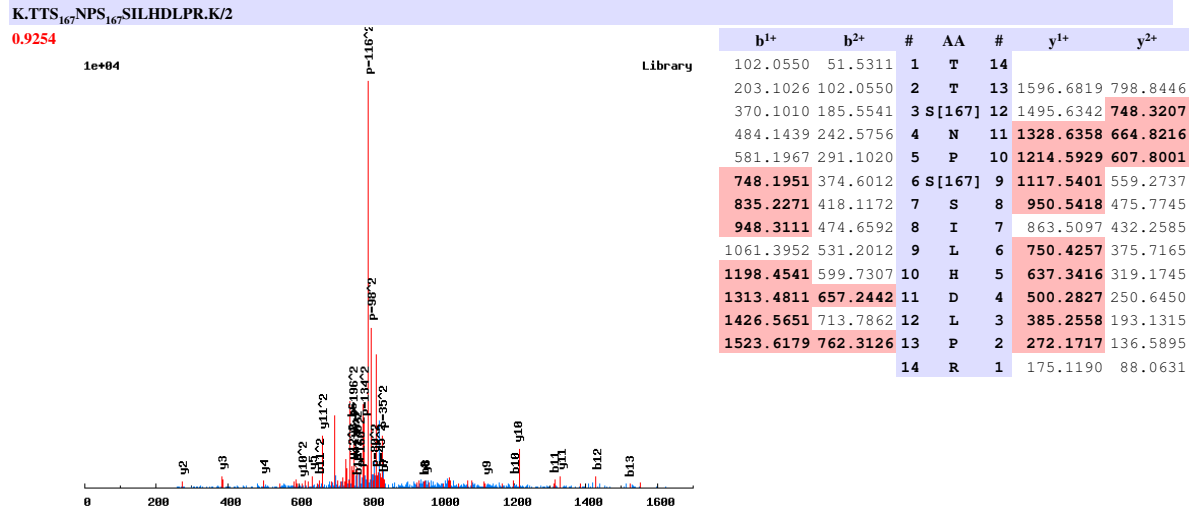



# Annotated spectra from Saleem et. al. 2009

R.TVDDLNF<sub>167</sub>NHS<sub>167</sub>S<sub>167</sub>DSHRK.S/3

0.9319

1e+04

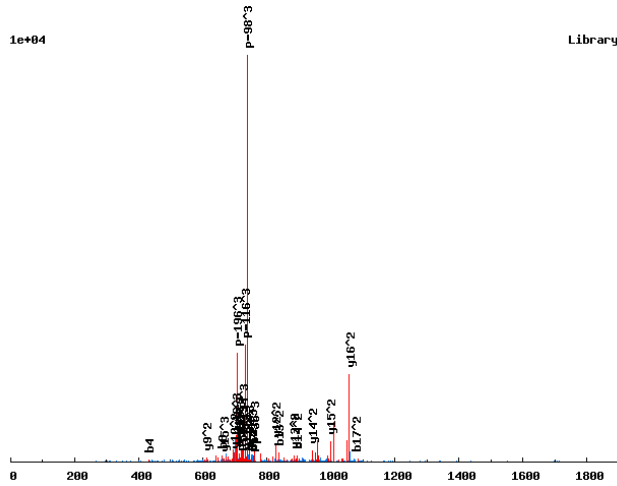

| Library | b <sup>1+</sup> | b <sup>2+</sup> | b <sup>3+</sup> | #  | AA     | #  | y <sup>1+</sup> | y <sup>2+</sup> | y <sup>3+</sup> |
|---------|-----------------|-----------------|-----------------|----|--------|----|-----------------|-----------------|-----------------|
|         | 102.0550        | 51.5311         | 34.6898         | 1  | T      | 18 |                 |                 |                 |
|         | 201.1234        | 101.0653        | 67.7126         | 2  | V      | 17 | 2212.7733       | 1106.8903       | 738.2626        |
|         | 316.1503        | 158.5788        | 106.0550        | 3  | D      | 16 | 2113.7049       | 1057.3561       | 705.2398        |
|         | 431.1772        | 216.0923        | 144.3973        | 4  | D      | 15 | 1998.6780       | 999.8426        | 666.8975        |
|         | 544.2613        | 272.6343        | 182.0920        | 5  | L      | 14 | 1883.6511       | 942.3292        | 628.5552        |
|         | 659.2882        | 330.1478        | 220.4343        | 6  | D      | 13 | 1770.5670       | 885.7871        | 590.8605        |
|         | 773.3312        | 387.1692        | 258.4486        | 7  | N      | 12 | 1655.5401       | 828.2737        | 552.5182        |
|         | 920.3996        | 460.7034        | 307.4714        | 8  | F      | 11 | 1541.4971       | 771.2522        | 514.5039        |
|         | 1087.3980       | 544.2026        | 363.1375        | 9  | S[167] | 10 | 1394.4287       | 697.7180        | 465.4811        |
|         | 1201.4409       | 601.2241        | 401.1518        | 10 | N      | 9  | 1227.4304       | 614.2188        | 409.8150        |
|         | 1338.4998       | 669.7535        | 446.8381        | 11 | H      | 8  | 1113.3874       | 557.1974        | 371.8007        |
|         | 1505.4982       | 753.2527        | 502.5042        | 12 | S[167] | 7  | 976.3285        | 488.6679        | 326.1144        |
|         | 1672.4965       | 836.7519        | 558.1704        | 13 | S[167] | 6  | 809.3302        | 405.1687        | 270.4482        |
|         | 1787.5235       | 894.2654        | 596.5127        | 14 | D      | 5  | 642.3318        | 321.6695        | 214.7821        |
|         | 1874.5555       | 937.7814        | 625.5233        | 15 | S      | 4  | 527.3049        | 264.1561        | 176.4398        |
|         | 2011.6144       | 1006.3108       | 671.2097        | 16 | H      | 3  | 440.2728        | 220.6401        | 147.4291        |
|         | 2167.7155       | 1084.3614       | 723.2434        | 17 | R      | 2  | 303.2139        | 152.1106        | 101.7428        |
|         |                 |                 |                 | 18 | K      | 1  | 147.1128        | 74.0600         | 49.7091         |

Annotated spectra from Saleem et. al. 2009

K.TVLS<sub>167</sub>DSAHF<sub>136</sub>VK<sub>136</sub>H/2

0.9987

1e+04

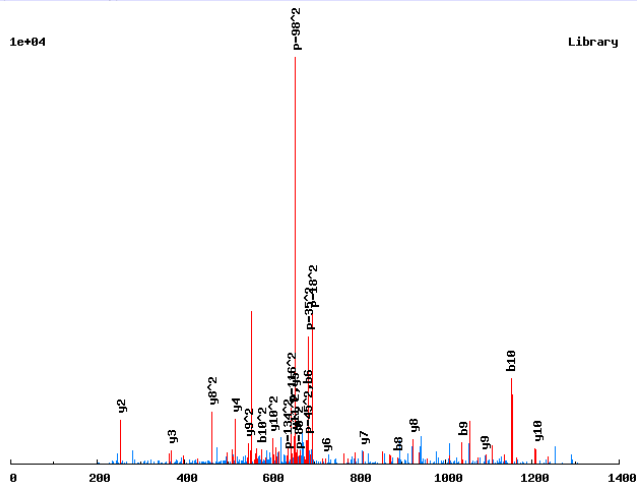

| Library | b <sup>1+</sup> | b <sup>2+</sup> | #  | AA     | #  | y <sup>1+</sup> | y <sup>2+</sup> |
|---------|-----------------|-----------------|----|--------|----|-----------------|-----------------|
|         | 102.0550        | 51.5311         | 1  | T      | 12 |                 |                 |
|         | 201.1234        | 101.0653        | 2  | V      | 11 | 1305.5966       | 653.3019        |
|         | 314.2074        | 157.6074        | 3  | L      | 10 | 1206.5282       | 603.7677        |
|         | 481.2058        | 241.1065        | 4  | S[167] | 9  | 1093.4441       | 547.2257        |
|         | 596.2327        | 298.6200        | 5  | D      | 8  | 926.4457        | 463.7265        |
|         | 683.2648        | 342.1360        | 6  | S      | 7  | 811.4188        | 406.2130        |
|         | 754.3019        | 377.6546        | 7  | A      | 6  | 724.3868        | 362.6970        |
|         | 891.3608        | 446.1840        | 8  | H      | 5  | 653.3497        | 327.1785        |
|         | 1038.4292       | 519.7182        | 9  | F      | 4  | 516.2908        | 258.6490        |
|         | 1153.4561       | 577.2317        | 10 | D      | 3  | 369.2223        | 185.1148        |
|         | 1252.5245       | 626.7659        | 11 | V      | 2  | 254.1954        | 127.6013        |
|         |                 |                 | 12 | K[136] | 1  | 155.1270        | 78.0671         |

### Annotated spectra from Saleem et. al. 2009

R.TVPEQENDES<sub>167</sub>DT<sub>181</sub>SPESNEVATNTAATR.H/3

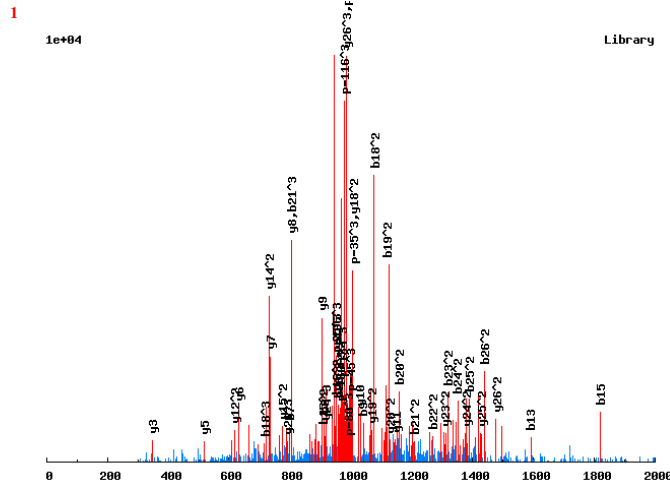

| Library | b <sup>1+</sup> | b <sup>2+</sup> | b <sup>3+</sup> | #  | AA      | #  | y <sup>1+</sup> | y <sup>2+</sup> | y <sup>3+</sup> |
|---------|-----------------|-----------------|-----------------|----|---------|----|-----------------|-----------------|-----------------|
|         | 102.0550        | 51.5311         | 34.6898         | 1  | T       | 27 |                 |                 |                 |
|         | 201.1234        | 101.0653        | 67.7126         | 2  | V       | 26 | 2951.1463       | 1476.0768       | 984.3870        |
|         | 298.1761        | 149.5917        | 100.0636        | 3  | P       | 25 | 2852.0779       | 1426.5426       | 951.3641        |
|         | 427.2187        | 214.1130        | 143.0778        | 4  | E       | 24 | 2755.0251       | 1378.0162       | 919.0132        |
|         | 555.2773        | 278.1423        | 185.7640        | 5  | Q       | 23 | 2625.9825       | 1313.4949       | 875.9990        |
|         | 684.3199        | 342.6636        | 228.7782        | 6  | E       | 22 | 2497.9240       | 1249.4656       | 833.3128        |
|         | 798.3628        | 399.6851        | 266.7925        | 7  | N       | 21 | 2368.8814       | 1184.9443       | 790.2986        |
|         | 913.3898        | 457.1985        | 305.1348        | 8  | D       | 20 | 2254.8384       | 1127.9229       | 752.2843        |
|         | 1042.4324       | 521.7198        | 348.1490        | 9  | E       | 19 | 2139.8115       | 1070.4094       | 713.9420        |
|         | 1209.4307       | 605.2190        | 403.8151        | 10 | S [167] | 18 | 2010.7689       | 1005.8881       | 670.9278        |
|         | 1324.4577       | 662.7325        | 442.1574        | 11 | D       | 17 | 1843.7705       | 922.3889        | 615.2617        |
|         | 1505.4717       | 753.2395        | 502.4954        | 12 | T [181] | 16 | 1728.7436       | 864.8754        | 576.9194        |
|         | 1592.5037       | 796.7555        | 531.5061        | 13 | S       | 15 | 1547.7296       | 774.3684        | 516.5814        |
|         | 1689.5565       | 845.2819        | 563.8570        | 14 | P       | 14 | 1460.6976       | 730.8524        | 487.5707        |
|         | 1818.5990       | 909.8032        | 606.8712        | 15 | E       | 13 | 1363.6448       | 682.3260        | 455.2198        |
|         | 1905.6311       | 953.3192        | 635.8819        | 16 | S       | 12 | 1234.6022       | 617.8047        | 412.2056        |
|         | 2019.6740       | 1010.3406       | 673.8962        | 17 | N       | 11 | 1147.5702       | 574.2887        | 383.1949        |
|         | 2148.7166       | 1074.8619       | 716.9104        | 18 | E       | 10 | 1033.5272       | 517.2673        | 345.1806        |
|         | 2247.7850       | 1124.3961       | 749.9332        | 19 | V       | 9  | 904.4847        | 452.7460        | 302.1664        |
|         | 2318.8221       | 1159.9147       | 773.6122        | 20 | A       | 8  | 805.4163        | 403.2118        | 269.1436        |
|         | 2419.8698       | 1210.4385       | 807.2948        | 21 | T       | 7  | 734.3791        | 367.6932        | 245.4646        |
|         | 2533.9127       | 1267.4600       | 845.3091        | 22 | N       | 6  | 633.3315        | 317.1694        | 211.7820        |
|         | 2634.9604       | 1317.9838       | 878.9917        | 23 | T       | 5  | 519.2885        | 260.1479        | 173.7677        |
|         | 2705.9975       | 1353.5024       | 902.6707        | 24 | A       | 4  | 418.2408        | 209.6241        | 140.0851        |
|         | 2777.0346       | 1389.0210       | 926.3497        | 25 | A       | 3  | 347.2037        | 174.1055        | 116.4061        |
|         | 2878.0823       | 1439.5448       | 960.0323        | 26 | T       | 2  | 276.1666        | 138.5870        | 92.7271         |
|         |                 |                 |                 | 27 | R       | 1  | 175.1190        | 88.0631         | 59.0445         |

# Annotated spectra from Saleem et. al. 2009

R.TVQDAKPAPSVAT<sub>181</sub>NDPS<sub>167</sub>PEPVPSAPEER.V/3

0.7236

1e+04

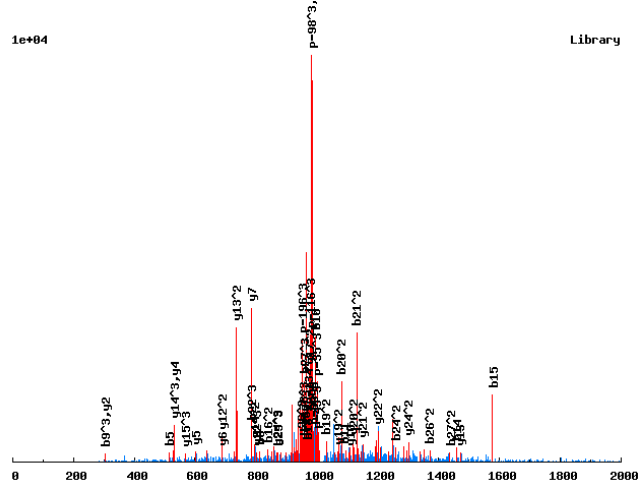

| Library | b <sup>1+</sup> | b <sup>2+</sup> | b <sup>3+</sup> | #  | AA     | #  | y <sup>1+</sup> | y <sup>2+</sup> | y <sup>3+</sup> |
|---------|-----------------|-----------------|-----------------|----|--------|----|-----------------|-----------------|-----------------|
|         | 102.0550        | 51.5311         | 34.6898         | 1  | T      | 28 |                 |                 |                 |
|         | 201.1234        | 101.0653        | 67.7126         | 2  | V      | 27 | 2945.2965       | 1473.1519       | 982.4370        |
|         | 329.1819        | 165.0946        | 110.3988        | 3  | Q      | 26 | 2846.2281       | 1423.6177       | 949.4142        |
|         | 444.2089        | 222.6081        | 148.7411        | 4  | D      | 25 | 2718.1695       | 1359.5884       | 906.7280        |
|         | 515.2460        | 258.1266        | 172.4202        | 5  | A      | 24 | 2603.1426       | 1302.0749       | 868.3857        |
|         | 643.3410        | 322.1741        | 215.1185        | 6  | K      | 23 | 2532.1055       | 1266.5564       | 844.7067        |
|         | 740.3937        | 370.7005        | 247.4694        | 7  | P      | 22 | 2404.0105       | 1202.5089       | 802.0084        |
|         | 811.4308        | 406.2191        | 271.1485        | 8  | A      | 21 | 2306.9577       | 1153.9825       | 769.6574        |
|         | 908.4836        | 454.7454        | 303.4994        | 9  | P      | 20 | 2235.9206       | 1118.4640       | 745.9784        |
|         | 995.5156        | 498.2615        | 332.5101        | 10 | S      | 19 | 2138.8679       | 1069.9376       | 713.6275        |
|         | 1094.5840       | 547.7957        | 365.5329        | 11 | V      | 18 | 2051.8358       | 1026.4216       | 684.6168        |
|         | 1165.6211       | 583.3142        | 389.2119        | 12 | A      | 17 | 1952.7674       | 976.8874        | 651.5940        |
|         | 1346.6352       | 673.8212        | 449.5499        | 13 | T[181] | 16 | 1881.7303       | 941.3688        | 627.9150        |
|         | 1460.6781       | 730.8427        | 487.5642        | 14 | N      | 15 | 1700.7163       | 850.8618        | 567.5770        |
|         | 1575.7050       | 788.3562        | 525.9065        | 15 | D      | 14 | 1586.6734       | 793.8403        | 529.5626        |
|         | 1672.7578       | 836.8825        | 558.2574        | 16 | P      | 13 | 1471.6464       | 736.3269        | 491.2203        |
|         | 1839.7561       | 920.3817        | 613.9236        | 17 | S[167] | 12 | 1374.5937       | 687.8005        | 458.8694        |
|         | 1936.8089       | 968.9081        | 646.2745        | 18 | P      | 11 | 1207.5953       | 604.3013        | 403.2033        |
|         | 2065.8515       | 1033.4294       | 689.2887        | 19 | E      | 10 | 1110.5426       | 555.7749        | 370.8524        |
|         | 2162.9043       | 1081.9558       | 721.6396        | 20 | P      | 9  | 981.5000        | 491.2536        | 327.8382        |
|         | 2261.9727       | 1131.4900       | 754.6624        | 21 | V      | 8  | 884.4472        | 442.7272        | 295.4873        |
|         | 2359.0254       | 1180.0164       | 787.0133        | 22 | P      | 7  | 785.3788        | 393.1930        | 262.4645        |
|         | 2446.0575       | 1223.5324       | 816.0240        | 23 | S      | 6  | 688.3260        | 344.6667        | 230.1135        |
|         | 2517.0946       | 1259.0509       | 839.7030        | 24 | A      | 5  | 601.2940        | 301.1506        | 201.1029        |
|         | 2614.1473       | 1307.5773       | 872.0540        | 25 | P      | 4  | 530.2569        | 265.6321        | 177.4238        |
|         | 2743.1899       | 1372.0986       | 915.0682        | 26 | E      | 3  | 433.2041        | 217.1057        | 145.0729        |
|         | 2872.2325       | 1436.6199       | 958.0824        | 27 | E      | 2  | 304.1615        | 152.5844        | 102.0587        |
|         |                 |                 |                 | 28 | R      | 1  | 175.1190        | 88.0631         | 59.0445         |

# Annotated spectra from Saleem et. al. 2009

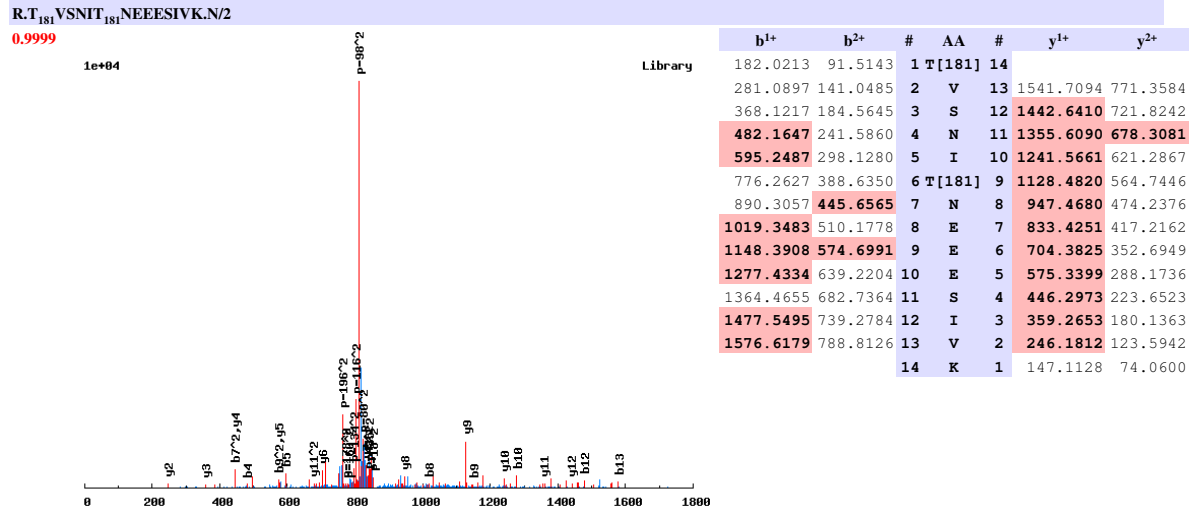

# Annotated spectra from Saleem et. al. 2009

K.TVS<sub>167</sub>NNAANSLs<sub>167</sub>R<sub>166</sub>Q/2

0.9997

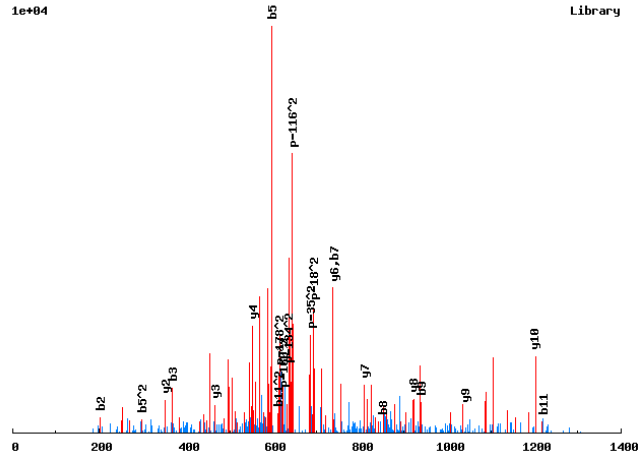

| Library | b <sup>1+</sup> | b <sup>2+</sup> | #  | AA     | #  | y <sup>1+</sup> | y <sup>2+</sup> |
|---------|-----------------|-----------------|----|--------|----|-----------------|-----------------|
|         | 102.0550        | 51.5311         | 1  | T      | 12 |                 |                 |
|         | 201.1234        | 101.0653        | 2  | V      | 11 | 1302.5115       | 651.7594        |
|         | 368.1217        | 184.5645        | 3  | S[167] | 10 | 1203.4430       | 602.2252        |
|         | 482.1647        | 241.5860        | 4  | N      | 9  | 1036.4447       | 518.7260        |
|         | 596.2076        | 298.6074        | 5  | N      | 8  | 922.4017        | 461.7045        |
|         | 667.2447        | 334.1260        | 6  | A      | 7  | 808.3588        | 404.6831        |
|         | 738.2818        | 369.6445        | 7  | A      | 6  | 737.3217        | 369.1645        |
|         | 852.3247        | 426.6660        | 8  | N      | 5  | 666.2846        | 333.6459        |
|         | 939.3568        | 470.1820        | 9  | S      | 4  | 552.2417        | 276.6245        |
|         | 1052.4408       | 526.7241        | 10 | L      | 3  | 465.2096        | 233.1085        |
|         | 1219.4392       | 610.2232        | 11 | S[167] | 2  | 352.1256        | 176.5664        |
|         |                 |                 | 12 | R[166] | 1  | 185.1272        | 93.0672         |

# Annotated spectra from Saleem et. al. 2009

K.TYS<sub>167</sub>AENVPLTSTVS<sub>167</sub>NDK<sub>136</sub>S/2

0.9997

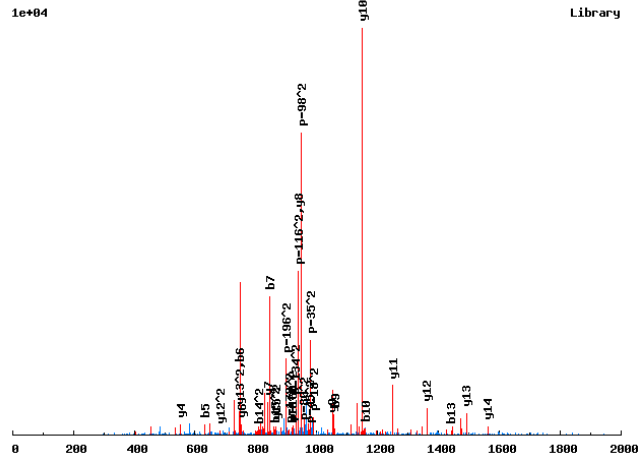

| Library | b <sup>1+</sup> | b <sup>2+</sup> | #  | AA     | #  | y <sup>1+</sup> | y <sup>2+</sup> |
|---------|-----------------|-----------------|----|--------|----|-----------------|-----------------|
|         | 102.0550        | 51.5311         | 1  | T      | 17 |                 |                 |
|         | 265.1183        | 133.0628        | 2  | Y      | 16 | 1892.7806       | 946.8939        |
|         | 432.1167        | 216.5620        | 3  | S[167] | 15 | 1729.7173       | 865.3623        |
|         | 503.1538        | 252.0805        | 4  | A      | 14 | 1562.7189       | 781.8631        |
|         | 632.1964        | 316.6018        | 5  | E      | 13 | 1491.6818       | 746.3445        |
|         | 746.2393        | 373.6233        | 6  | N      | 12 | 1362.6392       | 681.8232        |
|         | 845.3077        | 423.1575        | 7  | V      | 11 | 1248.5963       | 624.8018        |
|         | 942.3605        | 471.6839        | 8  | P      | 10 | 1149.5278       | 575.2676        |
|         | 1055.4445       | 528.2259        | 9  | L      | 9  | 1052.4751       | 526.7412        |
|         | 1156.4922       | 578.7497        | 10 | T      | 8  | 939.3910        | 470.1992        |
|         | 1243.5242       | 622.2658        | 11 | S      | 7  | 838.3433        | 419.6753        |
|         | 1344.5719       | 672.7896        | 12 | T      | 6  | 751.3113        | 376.1593        |
|         | 1443.6403       | 722.3238        | 13 | V      | 5  | 650.2636        | 325.6355        |
|         | 1610.6387       | 805.8230        | 14 | S[167] | 4  | 551.1952        | 276.1013        |
|         | 1724.6816       | 862.8444        | 15 | N      | 3  | 384.1969        | 192.6021        |
|         | 1839.7085       | 920.3579        | 16 | D      | 2  | 270.1539        | 135.5806        |
|         |                 |                 | 17 | K[136] | 1  | 155.1270        | 78.0671         |

# Annotated spectra from Saleem et. al. 2009

K.VAAEQPSTLNAESIK<sub>136</sub>GEDSGSADVQS<sub>167</sub>VQDHES<sub>167</sub>VK<sub>136</sub>I/3

0.9931

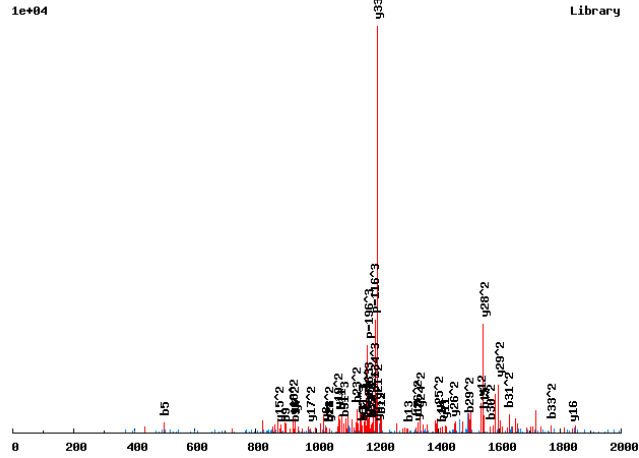

| Library | b <sup>1+</sup>  | b <sup>2+</sup>  | b <sup>3+</sup>  | #  | AA     | #  | y <sup>1+</sup>  | y <sup>2+</sup>  | y <sup>3+</sup>  |
|---------|------------------|------------------|------------------|----|--------|----|------------------|------------------|------------------|
|         | 100.0757         | 50.5415          | 34.0301          | 1  | V      | 34 |                  |                  |                  |
|         | 171.1128         | 86.0600          | 57.7091          | 2  | A      | 33 | 3589.5549        | 1795.2811        | <b>1197.1898</b> |
|         | 242.1499         | 121.5786         | 81.3882          | 3  | A      | 32 | 3518.5178        | 1759.7625        | <b>1173.5108</b> |
|         | 371.1925         | 186.0999         | 124.4024         | 4  | E      | 31 | 3447.4807        | 1724.2440        | <b>1149.8317</b> |
|         | <b>499.2511</b>  | 250.1292         | 167.0885         | 5  | Q      | 30 | 3318.4381        | 1659.7227        | 1106.8176        |
|         | 596.3038         | 298.6556         | 199.4395         | 6  | P      | 29 | 3190.3795        | <b>1595.6934</b> | 1064.1314        |
|         | 683.3359         | 342.1716         | 228.4501         | 7  | S      | 28 | 3093.3268        | <b>1547.1670</b> | 1031.7804        |
|         | 784.3836         | 392.6954         | 262.1327         | 8  | T      | 27 | 3006.2947        | 1503.6510        | 1002.7698        |
|         | <b>897.4676</b>  | 449.2374         | 299.8274         | 9  | L      | 26 | 2905.2471        | <b>1453.1272</b> | 969.0872         |
|         | 1011.5105        | 506.2589         | 337.8417         | 10 | N      | 25 | 2792.1630        | <b>1396.5851</b> | 931.3925         |
|         | <b>1082.5476</b> | 541.7775         | 361.5207         | 11 | A      | 24 | 2678.1201        | <b>1339.5637</b> | 893.3782         |
|         | <b>1211.5902</b> | 606.2988         | 404.5349         | 12 | E      | 23 | 2607.0829        | 1304.0451        | 869.6992         |
|         | <b>1298.6223</b> | 649.8148         | 433.5456         | 13 | S      | 22 | 2478.0404        | 1239.5238        | 826.6850         |
|         | <b>1411.7063</b> | 706.3568         | 471.2403         | 14 | I      | 21 | 2391.0083        | <b>1196.0078</b> | 797.6743         |
|         | <b>1547.8155</b> | 774.4114         | 516.6100         | 15 | K[136] | 20 | 2277.9243        | 1139.4658        | 759.9796         |
|         | 1604.8369        | 802.9221         | 535.6172         | 16 | G      | 19 | 2141.8151        | <b>1071.4112</b> | 714.6099         |
|         | 1733.8795        | 867.4434         | 578.6314         | 17 | E      | 18 | 2084.7937        | <b>1042.9005</b> | 695.6027         |
|         | 1848.9065        | <b>924.9569</b>  | 616.9737         | 18 | D      | 17 | 1955.7511        | <b>978.3792</b>  | 652.5885         |
|         | 1935.9385        | 968.4729         | 645.9844         | 19 | S      | 16 | <b>1840.7241</b> | <b>920.8657</b>  | 614.2462         |
|         | 1992.9600        | 996.9836         | 664.9915         | 20 | G      | 15 | 1753.6921        | <b>877.3497</b>  | 585.2356         |
|         | 2079.9920        | <b>1040.4996</b> | 694.0022         | 21 | S      | 14 | 1696.6706        | 848.8390         | 566.2284         |
|         | 2151.0291        | 1076.0182        | 717.6812         | 22 | A      | 13 | 1609.6386        | 805.3229         | 537.2177         |
|         | 2266.0560        | <b>1133.5317</b> | 756.0235         | 23 | D      | 12 | <b>1538.6015</b> | 769.8044         | 513.5387         |
|         | 2365.1245        | <b>1183.0659</b> | 789.0463         | 24 | V      | 11 | <b>1423.5746</b> | 712.2909         | 475.1964         |
|         | 2493.1830        | 1247.0952        | 831.7325         | 25 | Q      | 10 | <b>1324.5061</b> | 662.7567         | 442.1736         |
|         | 2660.1814        | <b>1330.5943</b> | 887.3987         | 26 | S[167] | 9  | <b>1196.4476</b> | 598.7274         | 399.4874         |
|         | 2759.2498        | 1380.1285        | 920.4215         | 27 | V      | 8  | <b>1029.4492</b> | 515.2282         | 343.8213         |
|         | 2887.3084        | 1444.1578        | 963.1076         | 28 | Q      | 7  | <b>930.3808</b>  | 465.6940         | 310.7985         |
|         | 3002.3353        | <b>1501.6713</b> | 1001.4500        | 29 | D      | 6  | 802.3222         | 401.6647         | 268.1123         |
|         | 3139.3942        | <b>1570.2008</b> | 1047.1363        | 30 | H      | 5  | 687.2953         | 344.1513         | 229.7699         |
|         | 3268.4368        | <b>1634.7221</b> | <b>1090.1505</b> | 31 | E      | 4  | 550.2364         | 275.6218         | 184.0836         |
|         | 3435.4352        | 1718.2212        | <b>1145.8166</b> | 32 | S[167] | 3  | 421.1938         | 211.1005         | 141.0694         |
|         | 3534.5036        | <b>1767.7554</b> | <b>1178.8394</b> | 33 | V      | 2  | 254.1954         | 127.6013         | 85.4033          |
|         |                  |                  |                  | 34 | K[136] | 1  | 155.1270         | 78.0671          | 52.3805          |



# Annotated spectra from Saleem et. al. 2009

K.VARPLSVPGS<sub>167</sub>PR.D/2

0.9598

1e+04

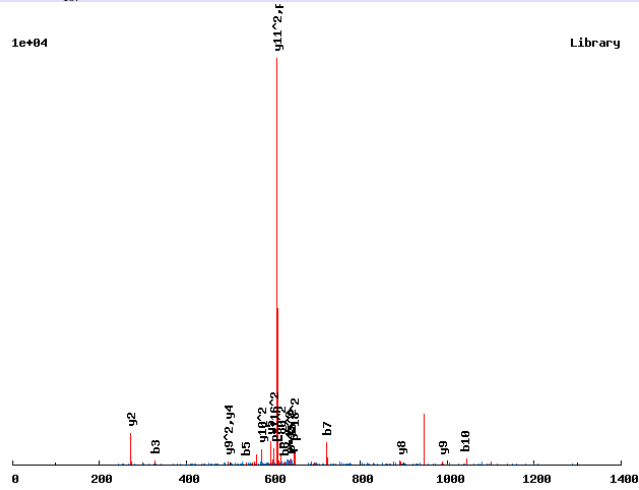

| Library | b <sup>1+</sup> | b <sup>2+</sup> | #  | AA      | #  | y <sup>1+</sup> | y <sup>2+</sup> |
|---------|-----------------|-----------------|----|---------|----|-----------------|-----------------|
|         | 100.0757        | 50.5415         | 1  | V       | 12 |                 |                 |
|         | 171.1128        | 86.0600         | 2  | A       | 11 | 1216.6198       | 608.8135        |
|         | 327.2139        | 164.1106        | 3  | R       | 10 | 1145.5827       | 573.2950        |
|         | 424.2667        | 212.6370        | 4  | P       | 9  | 989.4816        | 495.2444        |
|         | 537.3507        | 269.1790        | 5  | L       | 8  | 892.4288        | 446.7180        |
|         | 624.3828        | 312.6950        | 6  | S       | 7  | 779.3447        | 390.1760        |
|         | 723.4512        | 362.2292        | 7  | V       | 6  | 692.3127        | 346.6600        |
|         | 820.5039        | 410.7556        | 8  | P       | 5  | 593.2443        | 297.1258        |
|         | 877.5254        | 439.2663        | 9  | G       | 4  | 496.1915        | 248.5994        |
|         | 1044.5238       | 522.7655        | 10 | S [167] | 3  | 439.1701        | 220.0887        |
|         | 1141.5765       | 571.2919        | 11 | P       | 2  | 272.1717        | 136.5895        |
|         |                 |                 | 12 | R       | 1  | 175.1190        | 88.0631         |

# Annotated spectra from Saleem et. al. 2009

R.VASS<sub>167</sub>PIS<sub>167</sub>PGLHSTQYFR<sub>166</sub>S/2

0.9998

1e+04

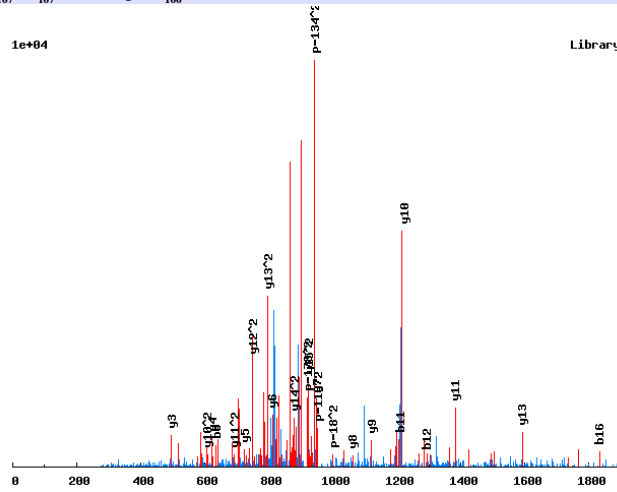

| Library | b <sup>1+</sup> | b <sup>2+</sup> | #  | AA     | #  | y <sup>1+</sup> | y <sup>2+</sup> |
|---------|-----------------|-----------------|----|--------|----|-----------------|-----------------|
|         | 100.0757        | 50.5415         | 1  | V      | 17 |                 |                 |
|         | 171.1128        | 86.0600         | 2  | A      | 16 | 1917.8171       | 959.4122        |
|         | 258.1448        | 129.5761        | 3  | S      | 15 | 1846.7800       | 923.8936        |
|         | 425.1432        | 213.0752        | 4  | S[167] | 14 | 1759.7480       | 880.3776        |
|         | 522.1960        | 261.6016        | 5  | P      | 13 | 1592.7496       | 796.8785        |
|         | 635.2800        | 318.1436        | 6  | I      | 12 | 1495.6969       | 748.3521        |
|         | 802.2784        | 401.6428        | 7  | S[167] | 11 | 1382.6128       | 691.8100        |
|         | 899.3311        | 450.1692        | 8  | P      | 10 | 1215.6144       | 608.3109        |
|         | 956.3526        | 478.6799        | 9  | G      | 9  | 1118.5617       | 559.7845        |
|         | 1069.4367       | 535.2220        | 10 | L      | 8  | 1061.5402       | 531.2737        |
|         | 1206.4956       | 603.7514        | 11 | H      | 7  | 948.4562        | 474.7317        |
|         | 1293.5276       | 647.2674        | 12 | S      | 6  | 811.3972        | 406.2023        |
|         | 1394.5753       | 697.7913        | 13 | T      | 5  | 724.3652        | 362.6862        |
|         | 1522.6339       | 761.8206        | 14 | Q      | 4  | 623.3175        | 312.1624        |
|         | 1685.6972       | 843.3522        | 15 | Y      | 3  | 495.2590        | 248.1331        |
|         | 1832.7656       | 916.8864        | 16 | F      | 2  | 332.1956        | 166.6015        |
|         |                 |                 | 17 | R[166] | 1  | 185.1272        | 93.0672         |

# Annotated spectra from Saleem et. al. 2009

R.VAT<sub>181</sub>PLS<sub>167</sub>GGVPPAPLPK.A/2

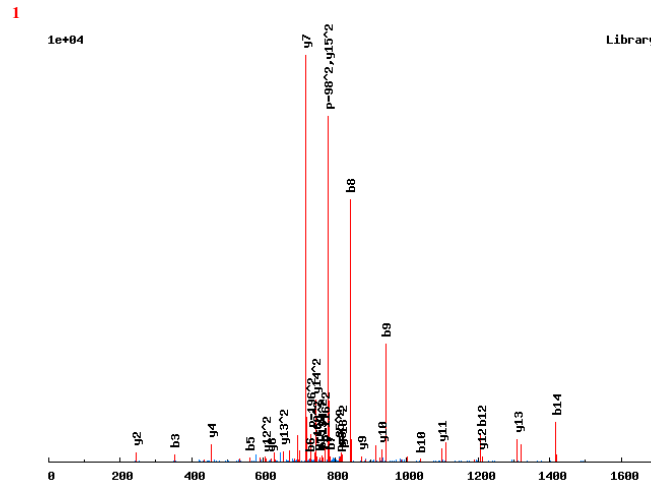

| Library | b <sup>1+</sup> | b <sup>2+</sup> | #  | AA     | #  | y <sup>1+</sup> | y <sup>2+</sup> |
|---------|-----------------|-----------------|----|--------|----|-----------------|-----------------|
|         | 100.0757        | 50.5415         | 1  | V      | 16 |                 |                 |
|         | 171.1128        | 86.0600         | 2  | A      | 15 | 1561.7426       | 781.3750        |
|         | 352.1268        | 176.5670        | 3  | T[181] | 14 | 1490.7055       | 745.8564        |
|         | 449.1796        | 225.0934        | 4  | P      | 13 | 1309.6915       | 655.3494        |
|         | 562.2636        | 281.6355        | 5  | L      | 12 | 1212.6388       | 606.8230        |
|         | 729.2620        | 365.1346        | 6  | S[167] | 11 | 1099.5547       | 550.2810        |
|         | 786.2835        | 393.6454        | 7  | G      | 10 | 932.5563        | 466.7818        |
|         | 843.3049        | 422.1561        | 8  | G      | 9  | 875.5349        | 438.2711        |
|         | 942.3733        | 471.6903        | 9  | V      | 8  | 818.5134        | 409.7604        |
|         | 1039.4261       | 520.2167        | 10 | P      | 7  | 719.4450        | 360.2261        |
|         | 1136.4788       | 568.7431        | 11 | P      | 6  | 622.3923        | 311.6998        |
|         | 1207.5160       | 604.2616        | 12 | A      | 5  | 525.3395        | 263.1734        |
|         | 1304.5687       | 652.7880        | 13 | P      | 4  | 454.3024        | 227.6548        |
|         | 1417.6528       | 709.3300        | 14 | L      | 3  | 357.2496        | 179.1284        |
|         | 1514.7055       | 757.8564        | 15 | P      | 2  | 244.1656        | 122.5864        |
|         |                 |                 | 16 | K      | 1  | 147.1128        | 74.0600         |

# Annotated spectra from Saleem et. al. 2009

R.VC<sub>160</sub>S<sub>167</sub>S<sub>167</sub>DSDLPGSDIK.S/2

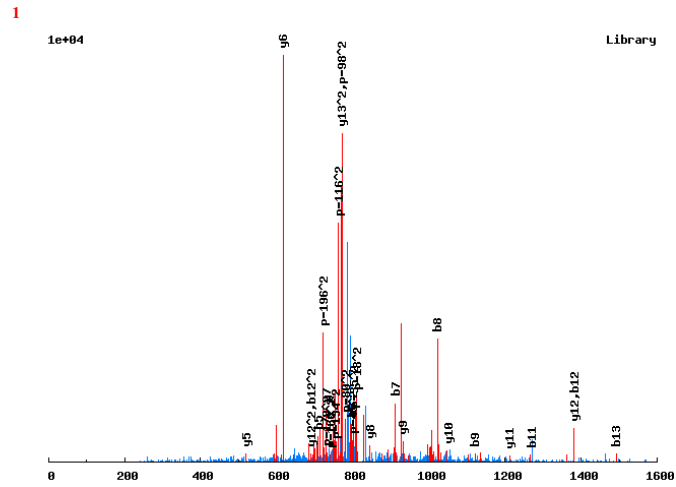

| Library | b <sup>1+</sup> | b <sup>2+</sup> | #  | AA     | #  | y <sup>1+</sup> | y <sup>2+</sup> |
|---------|-----------------|-----------------|----|--------|----|-----------------|-----------------|
|         | 100.0757        | 50.5415         | 1  | V      | 14 |                 |                 |
|         | 260.1063        | 130.5568        | 2  | C[160] | 13 | 1540.5274       | 770.7673        |
|         | 427.1047        | 214.0560        | 3  | S[167] | 12 | 1380.4967       | 690.7520        |
|         | 594.1031        | 297.5552        | 4  | S[167] | 11 | 1213.4984       | 607.2528        |
|         | 709.1300        | 355.0686        | 5  | D      | 10 | 1046.5000       | 523.7536        |
|         | 796.1620        | 398.5847        | 6  | S      | 9  | 931.4731        | 466.2402        |
|         | 911.1890        | 456.0981        | 7  | D      | 8  | 844.4411        | 422.7242        |
|         | 1024.2730       | 512.6402        | 8  | L      | 7  | 729.4141        | 365.2107        |
|         | 1121.3258       | 561.1665        | 9  | P      | 6  | 616.3301        | 308.6687        |
|         | 1178.3473       | 589.6773        | 10 | G      | 5  | 519.2773        | 260.1423        |
|         | 1265.3793       | 633.1933        | 11 | S      | 4  | 462.2558        | 231.6316        |
|         | 1380.4062       | 690.7068        | 12 | D      | 3  | 375.2238        | 188.1155        |
|         | 1493.4903       | 747.2488        | 13 | I      | 2  | 260.1969        | 130.6021        |
|         |                 |                 | 14 | K      | 1  | 147.1128        | 74.0600         |

# Annotated spectra from Saleem et. al. 2009

K.VDS<sub>167</sub>-PDDPFMTK<sub>136</sub>-S/2

0.9995

1e+04

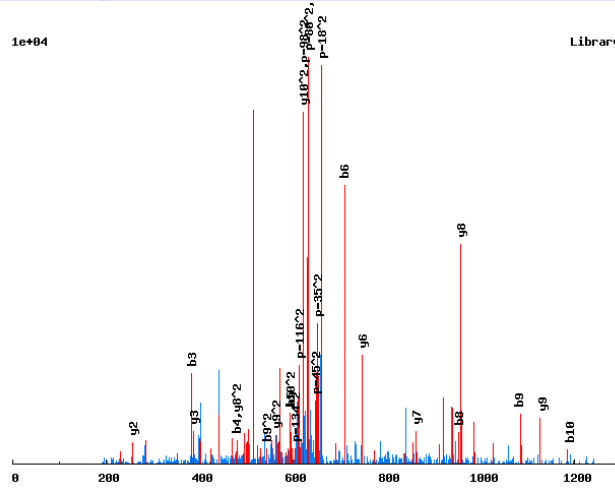

| Library | b <sup>1+</sup> | b <sup>2+</sup> | #  | AA     | #  | y <sup>1+</sup> | y <sup>2+</sup> |
|---------|-----------------|-----------------|----|--------|----|-----------------|-----------------|
|         | 100.0757        | 50.5415         | 1  | V      | 11 |                 |                 |
|         | 215.1026        | 108.0550        | 2  | D      | 10 | 1240.4683       | 620.7378        |
|         | 382.1010        | 191.5541        | 3  | S[167] | 9  | 1125.4413       | 563.2243        |
|         | 479.1538        | 240.0805        | 4  | P      | 8  | 958.4430        | 479.7251        |
|         | 594.1807        | 297.5940        | 5  | D      | 7  | 861.3902        | 431.1987        |
|         | 709.2076        | 355.1075        | 6  | D      | 6  | 746.3633        | 373.6853        |
|         | 806.2604        | 403.6338        | 7  | P      | 5  | 631.3363        | 316.1718        |
|         | 953.3288        | 477.1680        | 8  | F      | 4  | 534.2836        | 267.6454        |
|         | 1084.3693       | 542.6883        | 9  | M      | 3  | 387.2152        | 194.1112        |
|         | 1185.4170       | 593.2121        | 10 | T      | 2  | 256.1747        | 128.5910        |
|         |                 |                 | 11 | K[136] | 1  | 155.1270        | 78.0671         |

# Annotated spectra from Saleem et. al. 2009

K.VEDAEY<sub>243</sub>ESS<sub>167</sub>DDEDEKLDK.S/3

0.9935

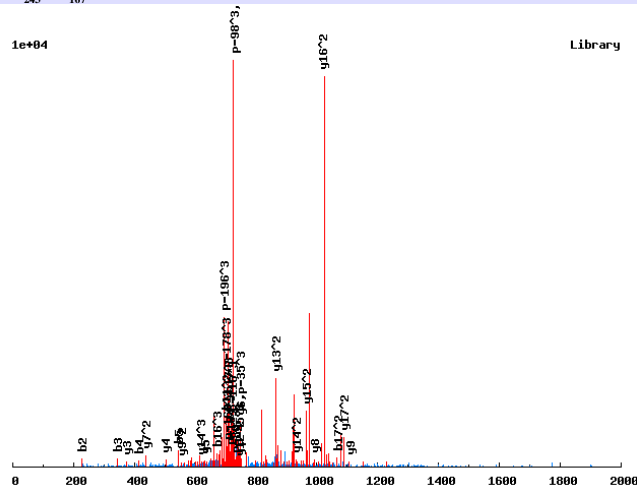

| Library | b <sup>1+</sup> | b <sup>2+</sup>  | b <sup>3+</sup> | #  | AA     | #  | y <sup>1+</sup>  | y <sup>2+</sup>  | y <sup>3+</sup> |
|---------|-----------------|------------------|-----------------|----|--------|----|------------------|------------------|-----------------|
|         | 100.0757        | 50.5415          | 34.0301         | 1  | V      | 18 |                  |                  |                 |
|         | <b>229.1183</b> | 115.0628         | 77.0443         | 2  | E      | 17 | 2176.7366        | <b>1088.8720</b> | <b>726.2504</b> |
|         | <b>344.1452</b> | 172.5762         | 115.3866        | 3  | D      | 16 | 2047.6940        | <b>1024.3507</b> | 683.2362        |
|         | <b>415.1823</b> | 208.0948         | 139.0656        | 4  | A      | 15 | 1932.6671        | <b>966.8372</b>  | 644.8939        |
|         | <b>544.2249</b> | 272.6161         | 182.0798        | 5  | E      | 14 | 1861.6300        | <b>931.3186</b>  | <b>621.2149</b> |
|         | 787.2546        | 394.1309         | 263.0897        | 6  | Y[243] | 13 | 1732.5874        | <b>866.7973</b>  | 578.2007        |
|         | 916.2972        | 458.6522         | 306.1039        | 7  | E      | 12 | 1489.5577        | <b>745.2825</b>  | 497.1908        |
|         | 1003.3292       | 502.1682         | 335.1146        | 8  | S      | 11 | 1360.5152        | 680.7612         | 454.1766        |
|         | 1170.3276       | 585.6674         | 390.7807        | 9  | S[167] | 10 | 1273.4831        | 637.2452         | 425.1659        |
|         | 1285.3545       | 643.1809         | 429.1230        | 10 | D      | 9  | <b>1106.4848</b> | <b>553.7460</b>  | 369.4998        |
|         | 1400.3814       | <b>700.6944</b>  | 467.4653        | 11 | D      | 8  | <b>991.4578</b>  | 496.2326         | 331.1575        |
|         | 1529.4240       | 765.2157         | 510.4795        | 12 | E      | 7  | 876.4309         | <b>438.7191</b>  | 292.8151        |
|         | 1644.4510       | 822.7291         | 548.8218        | 13 | D      | 6  | <b>747.3883</b>  | 374.1978         | 249.8010        |
|         | 1773.4936       | 887.2504         | 591.8360        | 14 | E      | 5  | <b>632.3614</b>  | 316.6843         | 211.4586        |
|         | 1901.5885       | 951.2979         | 634.5344        | 15 | K      | 4  | <b>503.3188</b>  | 252.1630         | 168.4444        |
|         | 2014.6726       | 1007.8399        | <b>672.2290</b> | 16 | L      | 3  | <b>375.2238</b>  | 188.1155         | 125.7461        |
|         | 2129.6995       | <b>1065.3534</b> | <b>710.5714</b> | 17 | D      | 2  | 262.1397         | 131.5735         | 88.0514         |
|         |                 |                  |                 | 18 | K      | 1  | 147.1128         | 74.0600          | 49.7091         |



# Annotated spectra from Saleem et. al. 2009

K.VEPVEGS<sub>167</sub>LQS<sub>167</sub>KL/2

0.9978

1e+04

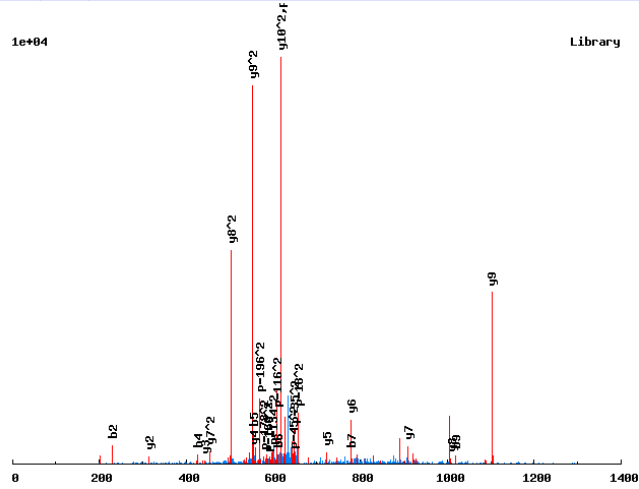

| Library | b <sup>1+</sup>  | b <sup>2+</sup> | #  | AA     | #  | y <sup>1+</sup>  | y <sup>2+</sup> |
|---------|------------------|-----------------|----|--------|----|------------------|-----------------|
|         | 100.0757         | 50.5415         | 1  | V      | 11 |                  |                 |
|         | <b>229.1183</b>  | 115.0628        | 2  | E      | 10 | 1233.4800        | <b>617.2436</b> |
|         | 326.1710         | 163.5892        | 3  | P      | 9  | 1104.4374        | 552.7223        |
|         | <b>425.2394</b>  | 213.1234        | 4  | V      | 8  | <b>1007.3846</b> | <b>504.1960</b> |
|         | <b>554.2820</b>  | 277.6447        | 5  | E      | 7  | 908.3162         | <b>454.6617</b> |
|         | <b>611.3035</b>  | 306.1554        | 6  | G      | 6  | <b>779.2736</b>  | 390.1405        |
|         | <b>778.3019</b>  | 389.6546        | 7  | S[167] | 5  | <b>722.2522</b>  | 361.6297        |
|         | 891.3859         | 446.1966        | 8  | L      | 4  | <b>555.2538</b>  | 278.1305        |
|         | <b>1019.4445</b> | 510.2259        | 9  | Q      | 3  | <b>442.1697</b>  | 221.5885        |
|         | 1186.4429        | 593.7251        | 10 | S[167] | 2  | <b>314.1112</b>  | 157.5592        |
|         |                  |                 | 11 | K      | 1  | 147.1128         | 74.0600         |



# Annotated spectra from Saleem et. al. 2009

R.VESGSQQTSHS<sub>167</sub>T<sub>181</sub>PIVQK.L/2

0.9986

1e+04

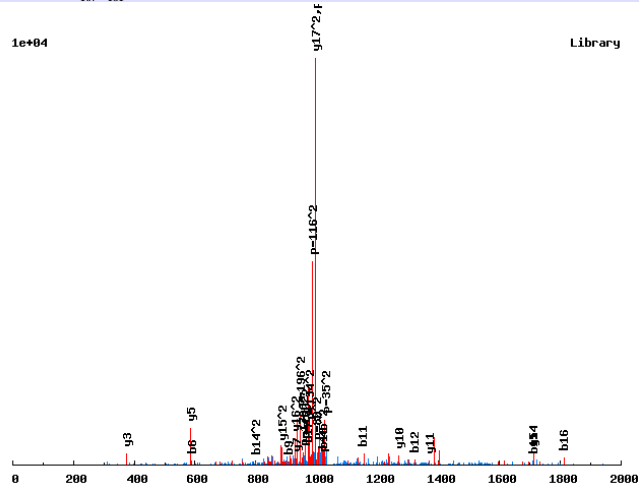

| Library | b <sup>1+</sup> | b <sup>2+</sup> | #  | AA     | #  | y <sup>1+</sup> | y <sup>2+</sup> |
|---------|-----------------|-----------------|----|--------|----|-----------------|-----------------|
|         | 100.0757        | 50.5415         | 1  | V      | 18 |                 |                 |
|         | 229.1183        | 115.0628        | 2  | E      | 17 | 1986.8569       | 993.9321        |
|         | 316.1503        | 158.5788        | 3  | S      | 16 | 1857.8143       | 929.4108        |
|         | 373.1718        | 187.0895        | 4  | G      | 15 | 1770.7823       | 885.8948        |
|         | 460.2038        | 230.6055        | 5  | S      | 14 | 1713.7609       | 857.3841        |
|         | 588.2624        | 294.6348        | 6  | Q      | 13 | 1626.7288       | 813.8681        |
|         | 716.3210        | 358.6641        | 7  | Q      | 12 | 1498.6702       | 749.8388        |
|         | 817.3686        | 409.1880        | 8  | T      | 11 | 1370.6117       | 685.8095        |
|         | 904.4007        | 452.7040        | 9  | S      | 10 | 1269.5640       | 635.2856        |
|         | 1017.4847       | 509.2460        | 10 | I      | 9  | 1182.5320       | 591.7696        |
|         | 1154.5436       | 577.7755        | 11 | H      | 8  | 1069.4479       | 535.2276        |
|         | 1321.5420       | 661.2746        | 12 | S[167] | 7  | 932.3890        | 466.6981        |
|         | 1502.5560       | 751.7816        | 13 | T[181] | 6  | 765.3906        | 383.1990        |
|         | 1599.6088       | 800.3080        | 14 | P      | 5  | 584.3766        | 292.6919        |
|         | 1712.6928       | 856.8501        | 15 | I      | 4  | 487.3238        | 244.1656        |
|         | 1811.7612       | 906.3843        | 16 | V      | 3  | 374.2398        | 187.6235        |
|         | 1939.8198       | 970.4136        | 17 | Q      | 2  | 275.1714        | 138.0893        |
|         |                 |                 | 18 | K      | 1  | 147.1128        | 74.0600         |

# Annotated spectra from Saleem et. al. 2009

R.VESGS<sub>167</sub>QQT<sub>181</sub>SIHST<sub>181</sub>PIVQK.L/3

0.8182

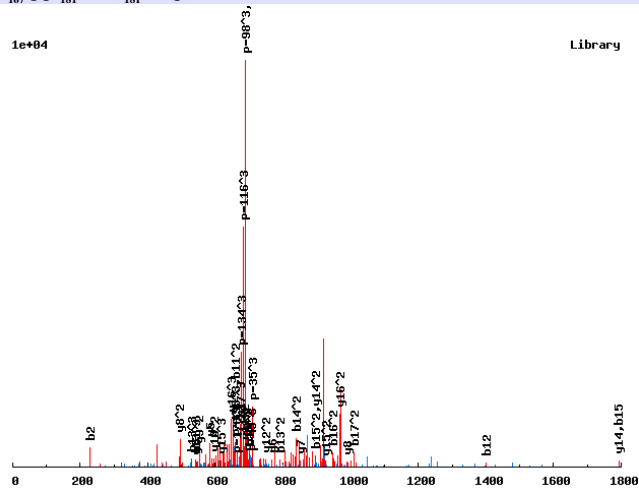

| Library | b <sup>1+</sup>  | b <sup>2+</sup>  | b <sup>3+</sup> | #  | AA     | #  | y <sup>1+</sup>  | y <sup>2+</sup> | y <sup>3+</sup> |
|---------|------------------|------------------|-----------------|----|--------|----|------------------|-----------------|-----------------|
|         | 100.0757         | 50.5415          | 34.0301         | 1  | V      | 18 |                  |                 |                 |
|         | <b>229.1183</b>  | 115.0628         | 77.0443         | 2  | E      | 17 | 2066.8233        | 1033.9153       | <b>689.6126</b> |
|         | 316.1503         | 158.5788         | 106.0550        | 3  | S      | 16 | 1937.7807        | <b>969.3940</b> | <b>646.5984</b> |
|         | 373.1718         | 187.0895         | 125.0621        | 4  | G      | 15 | 1850.7486        | <b>925.8780</b> | <b>617.5877</b> |
|         | <b>540.1701</b>  | 270.5887         | 180.7282        | 5  | S[167] | 14 | <b>1793.7272</b> | <b>897.3672</b> | 598.5806        |
|         | 668.2287         | 334.6180         | 223.4144        | 6  | Q      | 13 | 1626.7288        | 813.8681        | <b>542.9145</b> |
|         | 796.2873         | 398.6473         | 266.1006        | 7  | Q      | 12 | 1498.6702        | <b>749.8388</b> | 500.2283        |
|         | 977.3013         | 489.1543         | 326.4386        | 8  | T[181] | 11 | 1370.6117        | <b>685.8095</b> | 457.5421        |
|         | 1064.3333        | 532.6703         | 355.4493        | 9  | S      | 10 | 1189.5977        | <b>595.3025</b> | 397.2041        |
|         | 1177.4174        | 589.2123         | 393.1440        | 10 | I      | 9  | 1102.5656        | <b>551.7865</b> | 368.1934        |
|         | 1314.4763        | <b>657.7418</b>  | 438.8303        | 11 | H      | 8  | <b>989.4816</b>  | <b>495.2444</b> | 330.4987        |
|         | <b>1401.5083</b> | 701.2578         | 467.8410        | 12 | S      | 7  | <b>852.4227</b>  | 426.7150        | 284.8124        |
|         | 1582.5223        | <b>791.7648</b>  | <b>528.1790</b> | 13 | T[181] | 6  | <b>765.3906</b>  | 383.1990        | 255.8017        |
|         | 1679.5751        | <b>840.2912</b>  | 560.5299        | 14 | P      | 5  | <b>584.3766</b>  | 292.6919        | 195.4637        |
|         | <b>1792.6592</b> | <b>896.8332</b>  | 598.2246        | 15 | I      | 4  | 487.3238         | 244.1656        | 163.1128        |
|         | 1891.7276        | <b>946.3674</b>  | 631.2474        | 16 | V      | 3  | 374.2398         | 187.6235        | 125.4181        |
|         | 2019.7862        | <b>1010.3967</b> | <b>673.9336</b> | 17 | Q      | 2  | 275.1714         | 138.0893        | 92.3953         |
|         |                  |                  |                 | 18 | K      | 1  | 147.1128         | 74.0600         | 49.7091         |

# Annotated spectra from Saleem et. al. 2009

K.VEVTS<sub>167</sub>EDEK<sub>136</sub>ELESAAYDHAEPVQPEDAPQDIANDELK<sub>136</sub>DIPVK<sub>136</sub>S/4

0.7209

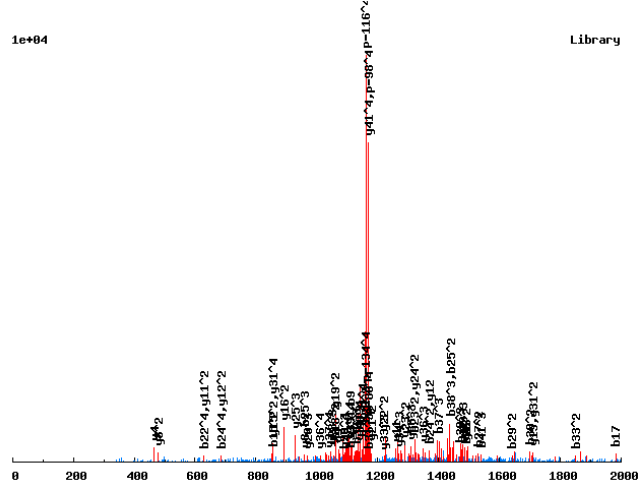

| Library | b <sup>1+</sup> | b <sup>2+</sup> | b <sup>3+</sup> | b <sup>4+</sup> | #  | AA | #  | y <sup>1+</sup> | y <sup>2+</sup> | y <sup>3+</sup> | y <sup>4+</sup> |
|---------|-----------------|-----------------|-----------------|-----------------|----|----|----|-----------------|-----------------|-----------------|-----------------|
|         | 100.0757        | 50.5415         | 34.0301         | 25.7744         | 1  | V  | 42 |                 |                 |                 |                 |
|         | 229.1183        | 115.0628        | 77.0443         | 58.0350         | 2  | E  | 41 | 4668.1461       | 2334.5767       | 1556.7202       | 1167.7920       |
|         | 328.1867        | 164.5970        | 110.0671        | 82.8021         | 3  | V  | 40 | 4539.1035       | 2270.0554       | 1513.7060       | 1135.5313       |
|         | 429.2344        | 215.1208        | 143.7496        | 108.0641        | 4  | T  | 39 | 4440.0351       | 2220.5212       | 1480.6832       | 1110.7642       |
|         | 596.2327        | 298.6200        | 199.4158        | 149.8136        | 5  | S  | 38 | 4338.9875       | 2169.9974       | 1447.0007       | 1085.5023       |
|         | 725.2753        | 363.1413        | 242.4300        | 182.0743        | 6  | E  | 37 | 4171.9891       | 2086.4982       | 1391.3346       | 1043.7527       |
|         | 840.3023        | 420.6548        | 280.7723        | 210.8310        | 7  | D  | 36 | 4042.9465       | 2021.9769       | 1348.3204       | 1011.4921       |
|         | 969.3449        | 485.1761        | 323.7865        | 243.0917        | 8  | E  | 35 | 3927.9196       | 1964.4634       | 1309.9780       | 982.7354        |
|         | 1105.4540       | 553.2306        | 369.1562        | 277.1190        | 9  | K  | 34 | 3798.8770       | 1899.9421       | 1266.9638       | 950.4747        |
|         | 1234.4966       | 617.7519        | 412.1704        | 309.3796        | 10 | E  | 33 | 3662.7678       | 1831.8875       | 1221.5941       | 916.4474        |
|         | 1347.5807       | 674.2940        | 449.8651        | 337.6506        | 11 | L  | 32 | 3533.7252       | 1767.3663       | 1178.5799       | 884.1868        |
|         | 1476.6232       | 738.8153        | 492.8793        | 369.9113        | 12 | E  | 31 | 3420.6412       | 1710.8242       | 1140.8852       | 855.9158        |
|         | 1563.6553       | 782.3313        | 521.8899        | 391.6693        | 13 | S  | 30 | 3291.5986       | 1646.3029       | 1097.8710       | 823.6511        |
|         | 1634.6924       | 817.8498        | 545.5690        | 409.4286        | 14 | A  | 29 | 3204.5665       | 1602.7869       | 1068.8604       | 801.8971        |
|         | 1705.7295       | 853.3684        | 569.2480        | 427.1878        | 15 | A  | 28 | 3133.5294       | 1567.2684       | 1045.1813       | 784.1378        |
|         | 1868.7928       | 934.9001        | 623.6025        | 467.9537        | 16 | Y  | 27 | 3062.4923       | 1531.7498       | 1021.5023       | 766.3785        |
|         | 1983.8198       | 992.4135        | 661.9448        | 496.7104        | 17 | D  | 26 | 2899.4290       | 1450.2181       | 967.1479        | 725.6127        |
|         | 2120.8787       | 1060.9430       | 707.6311        | 530.9751        | 18 | H  | 25 | 2784.4021       | 1392.7047       | 928.8055        | 696.8560        |
|         | 2191.9158       | 1096.4615       | 731.3101        | 548.7344        | 19 | A  | 24 | 2647.3431       | 1324.1752       | 883.1192        | 662.5912        |
|         | 2320.9584       | 1160.9828       | 774.3243        | 580.9951        | 20 | E  | 23 | 2576.3060       | 1288.6567       | 859.4402        | 644.8320        |
|         | 2418.0111       | 1209.5092       | 806.6752        | 605.2582        | 21 | P  | 22 | 2447.2634       | 1224.1354       | 816.4260        | 612.5713        |
|         | 2517.0795       | 1259.0434       | 839.6980        | 630.0253        | 22 | V  | 21 | 2350.2107       | 1175.6090       | 784.0751        | 588.3081        |
|         | 2645.1381       | 1323.0727       | 882.3842        | 662.0400        | 23 | Q  | 20 | 2251.1423       | 1126.0748       | 751.0523        | 563.5410        |
|         | 2742.1909       | 1371.5991       | 914.7351        | 686.3032        | 24 | P  | 19 | 2123.0837       | 1062.0455       | 708.3661        | 531.5264        |
|         | 2871.2335       | 1436.1204       | 957.7493        | 718.5638        | 25 | E  | 18 | 2026.0309       | 1013.5191       | 676.0152        | 507.2632        |
|         | 2986.2604       | 1493.6338       | 996.0917        | 747.3206        | 26 | D  | 17 | 1896.9883       | 948.9978        | 633.0010        | 475.0025        |
|         | 3057.2975       | 1529.1524       | 1019.7707       | 765.0798        | 27 | A  | 16 | 1781.9614       | 891.4843        | 594.6587        | 446.2458        |
|         | 3154.3503       | 1577.6788       | 1052.1216       | 789.3430        | 28 | P  | 15 | 1710.9243       | 855.9658        | 570.9796        | 428.4865        |
|         | 3282.4089       | 1641.7081       | 1094.8078       | 821.3577        | 29 | Q  | 14 | 1613.8715       | 807.4394        | 538.6287        | 404.2233        |
|         | 3397.4358       | 1699.2215       | 1133.1501       | 850.1144        | 30 | D  | 13 | 1485.8130       | 743.4101        | 495.9425        | 372.2087        |
|         | 3510.5199       | 1755.7636       | 1170.8448       | 878.3854        | 31 | I  | 12 | 1370.7860       | 685.8966        | 457.6002        | 343.4520        |
|         | 3581.5570       | 1791.2821       | 1194.5238       | 896.1447        | 32 | A  | 11 | 1257.7020       | 629.3546        | 419.9055        | 315.1809        |
|         | 3695.5999       | 1848.3036       | 1232.5382       | 924.6554        | 33 | N  | 10 | 1186.6648       | 593.8361        | 396.2265        | 297.4217        |
|         | 3810.6269       | 1905.8171       | 1270.8805       | 953.4122        | 34 | D  | 9  | 1072.6219       | 536.8146        | 358.2122        | 268.9109        |
|         | 3939.6694       | 1970.3384       | 1313.8947       | 985.6728        | 35 | E  | 8  | 957.5950        | 479.3011        | 319.8698        | 240.1542        |
|         | 4052.7535       | 2026.8804       | 1351.5894       | 1013.9438       | 36 | L  | 7  | 828.5524        | 414.7798        | 276.8556        | 207.8936        |
|         | 4188.8627       | 2094.9350       | 1396.9591       | 1047.9711       | 37 | K  | 6  | 715.4683        | 358.2378        | 239.1610        | 179.6225        |
|         | 4303.8896       | 2152.4484       | 1435.3014       | 1076.7279       | 38 | D  | 5  | 579.3592        | 290.1832        | 193.7912        | 145.5953        |
|         | 4416.9737       | 2208.9905       | 1472.9961       | 1104.9989       | 39 | I  | 4  | 464.3322        | 232.6698        | 155.4489        | 116.8385        |
|         | 4514.0264       | 2257.5168       | 1505.3470       | 1129.2621       | 40 | P  | 3  | 351.2482        | 176.1277        | 117.7542        | 88.5675         |
|         | 4613.0948       | 2307.0511       | 1538.3698       | 1154.0292       | 41 | V  | 2  | 254.1954        | 127.6013        | 85.4033         | 64.3043         |
|         |                 |                 |                 |                 | 42 | K  | 1  | 155.1270        | 78.0671         | 52.3805         | 39.5372         |

# Annotated spectra from Saleem et. al. 2009

K.VGQHEHEVC<sub>160</sub>DASDST<sub>181</sub>DS<sub>167</sub>IPK<sub>136</sub>N/3

0.9988

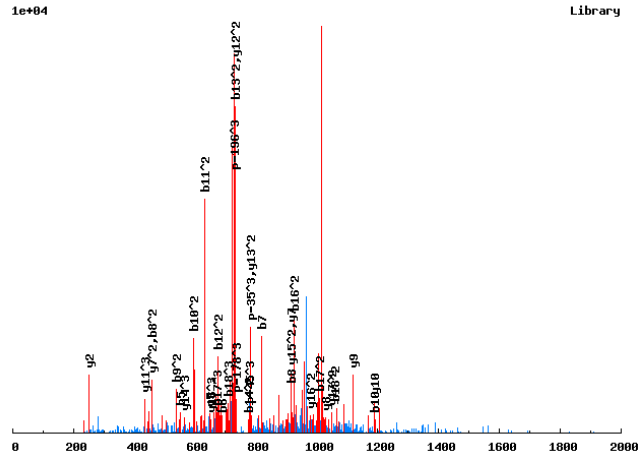

| Library | b <sup>1+</sup> | b <sup>2+</sup> | b <sup>3+</sup> | #  | AA     | #  | y <sup>1+</sup> | y <sup>2+</sup> | y <sup>3+</sup> |
|---------|-----------------|-----------------|-----------------|----|--------|----|-----------------|-----------------|-----------------|
|         | 100.0757        | 50.5415         | 34.0301         | 1  | V      | 20 |                 |                 |                 |
|         | 157.0971        | 79.0522         | 53.0372         | 2  | G      | 19 | 2279.8403       | 1140.4238       | 760.6183        |
|         | 285.1557        | 143.0815        | 95.7234         | 3  | Q      | 18 | 2222.8188       | 1111.9131       | 741.6111        |
|         | 422.2146        | 211.6110        | 141.4097        | 4  | H      | 17 | 2094.7602       | 1047.8838       | 698.9249        |
|         | 551.2572        | 276.1323        | 184.4239        | 5  | E      | 16 | 1957.7013       | 979.3543        | 653.2386        |
|         | 688.3161        | 344.6617        | 230.1102        | 6  | H      | 15 | 1828.6587       | 914.8330        | 610.2244        |
|         | 817.3587        | 409.1830        | 273.1244        | 7  | E      | 14 | 1691.5998       | 846.3036        | 564.5381        |
|         | 916.4271        | 458.7172        | 306.1472        | 8  | V      | 13 | 1562.5572       | 781.7823        | 521.5239        |
|         | 1076.4578       | 538.7325        | 359.4908        | 9  | C[160] | 12 | 1463.4888       | 732.2481        | 488.5011        |
|         | 1191.4847       | 596.2460        | 397.8331        | 10 | D      | 11 | 1303.4582       | 652.2327        | 435.1576        |
|         | 1262.5218       | 631.7646        | 421.5121        | 11 | A      | 10 | 1188.4312       | 594.7193        | 396.8153        |
|         | 1349.5539       | 675.2806        | 450.5228        | 12 | S      | 9  | 1117.3941       | 559.2007        | 373.1362        |
|         | 1464.5808       | 732.7940        | 488.8651        | 13 | D      | 8  | 1030.3621       | 515.6847        | 344.1256        |
|         | 1551.6128       | 776.3101        | 517.8758        | 14 | S      | 7  | 915.3352        | 458.1712        | 305.7832        |
|         | 1732.6269       | 866.8171        | 578.2138        | 15 | T[181] | 6  | 828.3031        | 414.6552        | 276.7726        |
|         | 1847.6538       | 924.3305        | 616.5561        | 16 | D      | 5  | 647.2891        | 324.1482        | 216.4346        |
|         | 2014.6522       | 1007.8297       | 672.2222        | 17 | S[167] | 4  | 532.2622        | 266.6347        | 178.0922        |
|         | 2127.7362       | 1064.3717       | 709.9169        | 18 | I      | 3  | 365.2638        | 183.1355        | 122.4261        |
|         | 2224.7890       | 1112.8981       | 742.2678        | 19 | P      | 2  | 252.1798        | 126.5935        | 84.7314         |
|         |                 |                 |                 | 20 | K[136] | 1  | 155.1270        | 78.0671         | 52.3805         |

# Annotated spectra from Saleem et. al. 2009

K.VGS<sub>167</sub>-IGSQS<sub>167</sub>-ASR<sub>166</sub>-N/2

0.9407

1e+04

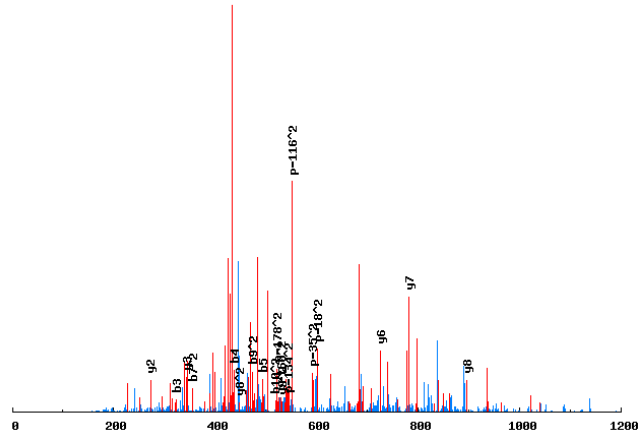

| Library | b <sup>1+</sup> | b <sup>2+</sup> | #  | AA     | #  | y <sup>1+</sup> | y <sup>2+</sup> |
|---------|-----------------|-----------------|----|--------|----|-----------------|-----------------|
|         | 100.0757        | 50.5415         | 1  | V      | 11 |                 |                 |
|         | 157.0971        | 79.0522         | 2  | G      | 10 | 1119.4107       | 560.2090        |
|         | 324.0955        | 162.5514        | 3  | S[167] | 9  | 1062.3892       | 531.6982        |
|         | 437.1796        | 219.0934        | 4  | I      | 8  | 895.3909        | 448.1991        |
|         | 494.2010        | 247.6042        | 5  | G      | 7  | 782.3068        | 391.6570        |
|         | 581.2331        | 291.1202        | 6  | S      | 6  | 725.2853        | 363.1463        |
|         | 709.2916        | 355.1495        | 7  | Q      | 5  | 638.2533        | 319.6303        |
|         | 876.2900        | 438.6486        | 8  | S[167] | 4  | 510.1947        | 255.6010        |
|         | 947.3271        | 474.1672        | 9  | A      | 3  | 343.1964        | 172.1018        |
|         | 1034.3591       | 517.6832        | 10 | S      | 2  | 272.1592        | 136.5833        |
|         |                 |                 | 11 | R[166] | 1  | 185.1272        | 93.0672         |

# Annotated spectra from Saleem et. al. 2009

K.VHSYT<sub>181</sub>DLAYR.M/3

0.9957

1e+04

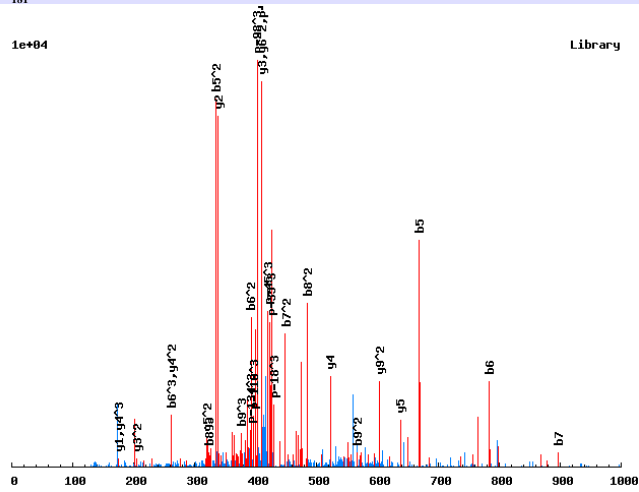

| Library | b <sup>1+</sup> | b <sup>2+</sup> | b <sup>3+</sup> | #  | AA     | #  | y <sup>1+</sup> | y <sup>2+</sup> | y <sup>3+</sup> |
|---------|-----------------|-----------------|-----------------|----|--------|----|-----------------|-----------------|-----------------|
|         | 100.0757        | 50.5415         | 34.0301         | 1  | V      | 10 |                 |                 |                 |
|         | 237.1346        | 119.0709        | 79.7164         | 2  | H      | 9  | 1205.4987       | 603.2530        | 402.5044        |
|         | 324.1666        | 162.5870        | 108.7271        | 3  | S      | 8  | 1068.4398       | 534.7235        | 356.8181        |
|         | 487.2300        | 244.1186        | 163.0815        | 4  | Y      | 7  | 981.4077        | 491.2075        | 327.8074        |
|         | 668.2440        | 334.6256        | 223.4195        | 5  | T[181] | 6  | 818.3444        | 409.6758        | 273.4530        |
|         | 783.2709        | 392.1391        | 261.7618        | 6  | D      | 5  | 637.3304        | 319.1688        | 213.1150        |
|         | 896.3550        | 448.6811        | 299.4565        | 7  | L      | 4  | 522.3035        | 261.6554        | 174.7727        |
|         | 967.3921        | 484.1997        | 323.1355        | 8  | A      | 3  | 409.2194        | 205.1133        | 137.0780        |
|         | 1130.4554       | 565.7313        | 377.4900        | 9  | Y      | 2  | 338.1823        | 169.5948        | 113.3989        |
|         |                 |                 |                 | 10 | R      | 1  | 175.1190        | 88.0631         | 59.0445         |

# Annotated spectra from Saleem et. al. 2009

K.VIADDS<sub>167</sub>KKQT<sub>181</sub>PENEDLLK.E/3

0.9705

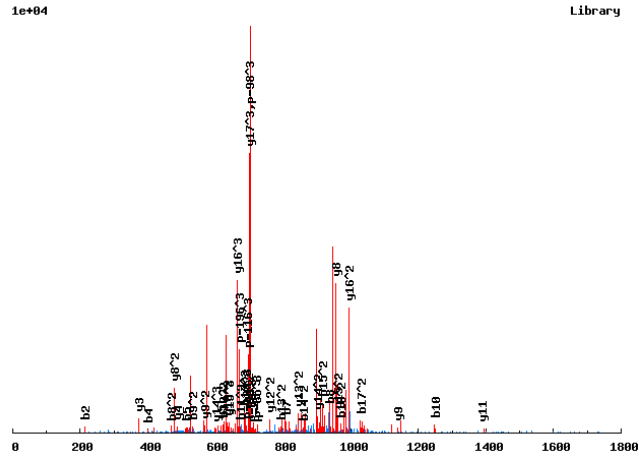

| Library | b <sup>1+</sup>  | b <sup>2+</sup>  | b <sup>3+</sup> | #  | AA     | #  | y <sup>1+</sup>  | y <sup>2+</sup> | y <sup>3+</sup> |
|---------|------------------|------------------|-----------------|----|--------|----|------------------|-----------------|-----------------|
|         | 100.0757         | 50.5415          | 34.0301         | 1  | V      | 18 |                  |                 |                 |
|         | <b>213.1598</b>  | 107.0835         | 71.7248         | 2  | I      | 17 | 2103.9247        | 1052.4660       | <b>701.9797</b> |
|         | 284.1969         | 142.6021         | 95.4038         | 3  | A      | 16 | 1990.8406        | <b>995.9239</b> | <b>664.2851</b> |
|         | <b>399.2238</b>  | 200.1155         | 133.7461        | 4  | D      | 15 | 1919.8035        | <b>960.4054</b> | <b>640.6060</b> |
|         | <b>514.2507</b>  | 257.6290         | 172.0884        | 5  | D      | 14 | 1804.7765        | <b>902.8919</b> | <b>602.2637</b> |
|         | 681.2491         | 341.1282         | 227.7546        | 6  | S[167] | 13 | 1689.7496        | <b>845.3784</b> | 563.9214        |
|         | <b>809.3441</b>  | 405.1757         | 270.4529        | 7  | K      | 12 | 1522.7512        | <b>761.8793</b> | 508.2553        |
|         | <b>937.4390</b>  | <b>469.2232</b>  | 313.1512        | 8  | K      | 11 | <b>1394.6563</b> | <b>697.8318</b> | 465.5569        |
|         | 1065.4976        | <b>533.2524</b>  | 355.8374        | 9  | Q      | 10 | 1266.5613        | <b>633.7843</b> | 422.8586        |
|         | <b>1246.5116</b> | <b>623.7594</b>  | 416.1754        | 10 | T[181] | 9  | <b>1138.5027</b> | <b>569.7550</b> | 380.1724        |
|         | 1343.5644        | <b>672.2858</b>  | 448.5263        | 11 | P      | 8  | <b>957.4887</b>  | <b>479.2480</b> | 319.8344        |
|         | 1472.6070        | 736.8071         | 491.5405        | 12 | E      | 7  | 860.4360         | 430.7216        | 287.4835        |
|         | 1586.6499        | <b>793.8286</b>  | 529.5548        | 13 | N      | 6  | 731.3934         | 366.2003        | 244.4693        |
|         | 1715.6925        | <b>858.3499</b>  | 572.5690        | 14 | E      | 5  | <b>617.3505</b>  | 309.1789        | 206.4550        |
|         | 1830.7194        | <b>915.8634</b>  | 610.9113        | 15 | D      | 4  | <b>488.3079</b>  | 244.6576        | 163.4408        |
|         | 1943.8035        | <b>972.4054</b>  | 648.6060        | 16 | L      | 3  | <b>373.2809</b>  | 187.1441        | 125.0985        |
|         | 2056.8875        | <b>1028.9474</b> | <b>686.3007</b> | 17 | L      | 2  | 260.1969         | 130.6021        | 87.4038         |
|         |                  |                  |                 | 18 | K      | 1  | 147.1128         | 74.0600         | 49.7091         |

# Annotated spectra from Saleem et. al. 2009

K.VIHGS<sub>167</sub>ENLHR<sub>166</sub>Q/3

0.9467

1e+04

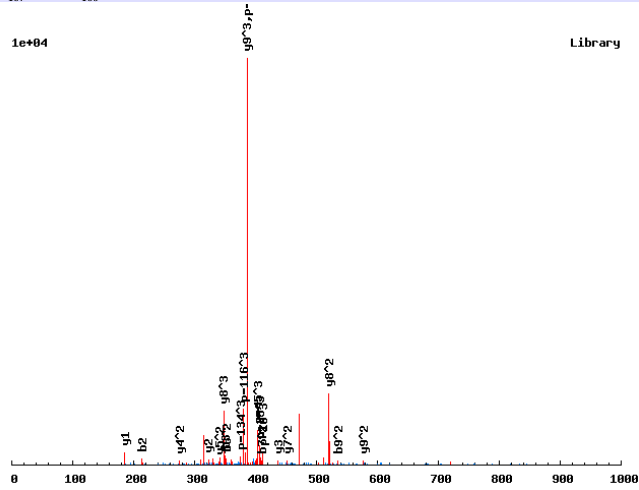

| Library | b <sup>1+</sup> | b <sup>2+</sup> | b <sup>3+</sup> | #  | AA     | #  | y <sup>1+</sup> | y <sup>2+</sup> | y <sup>3+</sup> |
|---------|-----------------|-----------------|-----------------|----|--------|----|-----------------|-----------------|-----------------|
|         | 100.0757        | 50.5415         | 34.0301         | 1  | V      | 10 |                 |                 |                 |
|         | 213.1598        | 107.0835        | 71.7248         | 2  | I      | 9  | 1152.5185       | 576.7629        | 384.8444        |
|         | 350.2187        | 175.6130        | 117.4111        | 3  | H      | 8  | 1039.4344       | 520.2209        | 347.1497        |
|         | 407.2401        | 204.1237        | 136.4182        | 4  | G      | 7  | 902.3755        | 451.6914        | 301.4634        |
|         | 574.2385        | 287.6229        | 192.0843        | 5  | S[167] | 6  | 845.3541        | 423.1807        | 282.4562        |
|         | 703.2811        | 352.1442        | 235.0985        | 6  | E      | 5  | 678.3557        | 339.6815        | 226.7901        |
|         | 817.3240        | 409.1656        | 273.1129        | 7  | N      | 4  | 549.3131        | 275.1602        | 183.7759        |
|         | 930.4081        | 465.7077        | 310.8075        | 8  | L      | 3  | 435.2702        | 218.1387        | 145.7616        |
|         | 1067.4670       | 534.2371        | 356.4938        | 9  | H      | 2  | 322.1861        | 161.5967        | 108.0669        |
|         |                 |                 |                 | 10 | R[166] | 1  | 185.1272        | 93.0672         | 62.3806         |



# Annotated spectra from Saleem et. al. 2009

R.VHS<sub>167</sub>FNLTK<sub>136</sub>-K/3

0.6092

1e+04

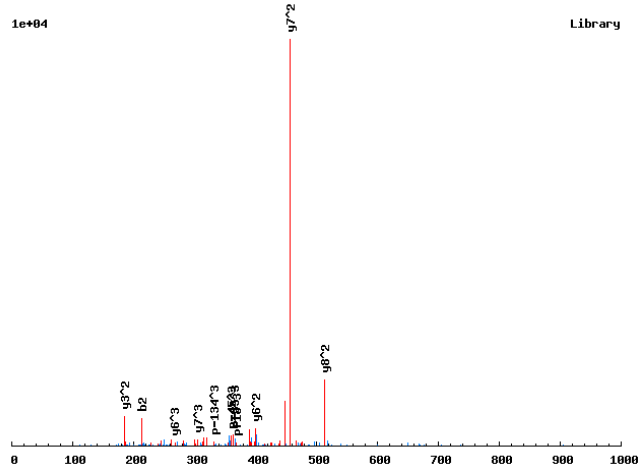

| Library | b <sup>1+</sup> | b <sup>2+</sup> | b <sup>3+</sup> | # | AA     | # | y <sup>1+</sup> | y <sup>2+</sup> | y <sup>3+</sup> |
|---------|-----------------|-----------------|-----------------|---|--------|---|-----------------|-----------------|-----------------|
|         | 100.0757        | 50.5415         | 34.0301         | 1 | V      | 9 |                 |                 |                 |
|         | <b>213.1598</b> | 107.0835        | 71.7248         | 2 | I      | 8 | 1023.5366       | <b>512.2719</b> | 341.8504        |
|         | 326.2438        | 163.6255        | 109.4195        | 3 | I      | 7 | 910.4525        | <b>455.7299</b> | <b>304.1557</b> |
|         | 493.2422        | 247.1247        | 165.0856        | 4 | S[167] | 6 | 797.3684        | <b>399.1879</b> | <b>266.4610</b> |
|         | 640.3106        | 320.6589        | 214.1084        | 5 | F      | 5 | 630.3701        | 315.6887        | 210.7949        |
|         | 754.3535        | 377.6804        | 252.1227        | 6 | N      | 4 | 483.3017        | 242.1545        | 161.7721        |
|         | 867.4376        | 434.2224        | 289.8174        | 7 | L      | 3 | 369.2587        | <b>185.1330</b> | 123.7578        |
|         | 968.4853        | 484.7463        | 323.4999        | 8 | T      | 2 | 256.1747        | 128.5910        | 86.0631         |
|         |                 |                 |                 | 9 | K[136] | 1 | 155.1270        | 78.0671         | 52.3805         |

# Annotated spectra from Saleem et. al. 2009

R.VIS<sub>167</sub>NK<sub>136</sub>VEK<sub>136</sub>DS<sub>167</sub>DSEQR<sub>166</sub>G/2

0.9916

1e+04

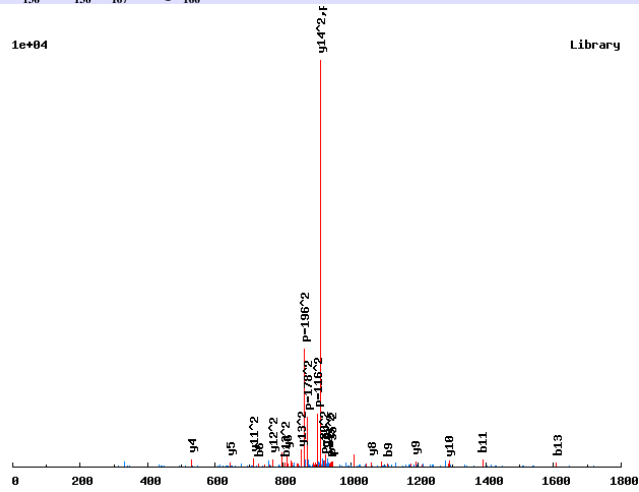

| Library | b <sup>1+</sup> | b <sup>2+</sup> | #  | AA     | #  | y <sup>1+</sup> | y <sup>2+</sup> |
|---------|-----------------|-----------------|----|--------|----|-----------------|-----------------|
|         | 100.0757        | 50.5415         | 1  | V      | 15 |                 |                 |
|         | 213.1598        | 107.0835        | 2  | I      | 14 | 1820.7673       | 910.8873        |
|         | 380.1581        | 190.5827        | 3  | S[167] | 13 | 1707.6833       | 854.3453        |
|         | 494.2010        | 247.6042        | 4  | N      | 12 | 1540.6849       | 770.8461        |
|         | 630.3102        | 315.6587        | 5  | K[136] | 11 | 1426.6420       | 713.8246        |
|         | 729.3786        | 365.1929        | 6  | V      | 10 | 1290.5328       | 645.7700        |
|         | 858.4212        | 429.7142        | 7  | E      | 9  | 1191.4644       | 596.2358        |
|         | 994.5304        | 497.7688        | 8  | K[136] | 8  | 1062.4218       | 531.7145        |
|         | 1109.5573       | 555.2823        | 9  | D      | 7  | 926.3127        | 463.6600        |
|         | 1276.5557       | 638.7815        | 10 | S[167] | 6  | 811.2857        | 406.1465        |
|         | 1391.5826       | 696.2949        | 11 | D      | 5  | 644.2874        | 322.6473        |
|         | 1478.6146       | 739.8110        | 12 | S      | 4  | 529.2604        | 265.1338        |
|         | 1607.6572       | 804.3323        | 13 | E      | 3  | 442.2284        | 221.6178        |
|         | 1735.7158       | 868.3615        | 14 | Q      | 2  | 313.1858        | 157.0965        |
|         |                 |                 | 15 | R[166] | 1  | 185.1272        | 93.0672         |

# Annotated spectra from Saleem et. al. 2009

R.VIS<sub>167</sub>QDALQHFR.S/2

0.9563

1e+04

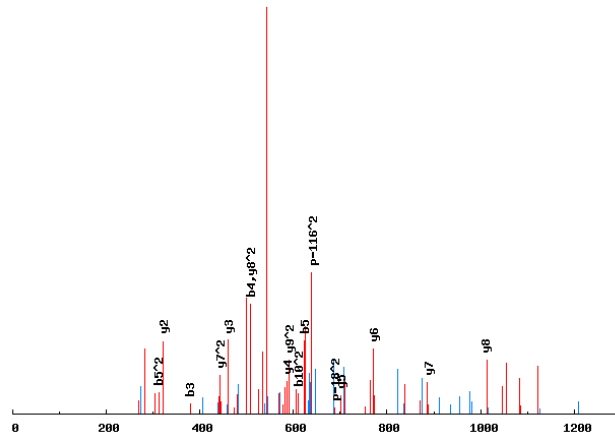

| Library | b <sup>1+</sup> | b <sup>2+</sup> | #  | AA     | #  | y <sup>1+</sup> | y <sup>2+</sup> |
|---------|-----------------|-----------------|----|--------|----|-----------------|-----------------|
|         | 100.0757        | 50.5415         | 1  | V      | 11 |                 |                 |
|         | 213.1598        | 107.0835        | 2  | I      | 10 | 1294.5940       | 647.8006        |
|         | 380.1581        | 190.5827        | 3  | S[167] | 9  | 1181.5099       | 591.2586        |
|         | 508.2167        | 254.6120        | 4  | Q      | 8  | 1014.5115       | 507.7594        |
|         | 623.2436        | 312.1255        | 5  | D      | 7  | 886.4530        | 443.7301        |
|         | 694.2807        | 347.6440        | 6  | A      | 6  | 771.4260        | 386.2167        |
|         | 807.3648        | 404.1860        | 7  | L      | 5  | 700.3889        | 350.6981        |
|         | 935.4234        | 468.2153        | 8  | Q      | 4  | 587.3049        | 294.1561        |
|         | 1072.4823       | 536.7448        | 9  | H      | 3  | 459.2463        | 230.1268        |
|         | 1219.5507       | 610.2790        | 10 | F      | 2  | 322.1874        | 161.5973        |
|         |                 |                 | 11 | R      | 1  | 175.1190        | 88.0631         |

# Annotated spectra from Saleem et. al. 2009

R.VLSENGDVS<sub>167</sub>PSVLK.Q/2

0.8226

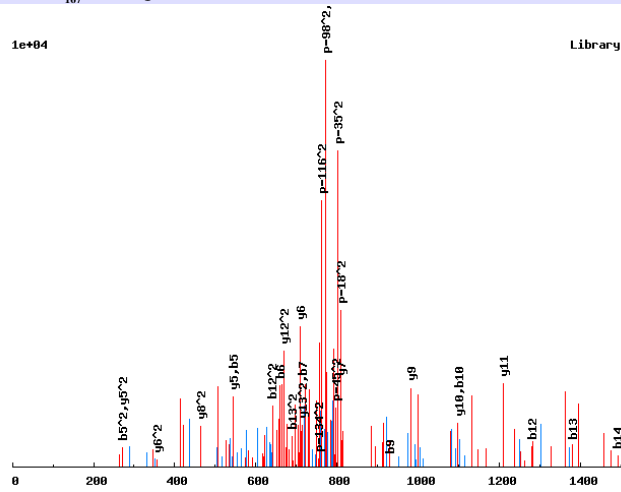

| Library | b <sup>1+</sup> | b <sup>2+</sup> | #  | AA      | #  | y <sup>1+</sup> | y <sup>2+</sup> |
|---------|-----------------|-----------------|----|---------|----|-----------------|-----------------|
|         | 100.0757        | 50.5415         | 1  | V       | 15 |                 |                 |
|         | 213.1598        | 107.0835        | 2  | L       | 14 | 1539.6938       | 770.3505        |
|         | 300.1918        | 150.5995        | 3  | S       | 13 | 1426.6097       | 713.8085        |
|         | 429.2344        | 215.1208        | 4  | E       | 12 | 1339.5777       | 670.2925        |
|         | 543.2773        | 272.1423        | 5  | N       | 11 | 1210.5351       | 605.7712        |
|         | 658.3042        | 329.6558        | 6  | D       | 10 | 1096.4922       | 548.7497        |
|         | 715.3257        | 358.1665        | 7  | G       | 9  | 981.4652        | 491.2363        |
|         | 830.3526        | 415.6800        | 8  | D       | 8  | 924.4438        | 462.7255        |
|         | 929.4210        | 465.2142        | 9  | V       | 7  | 809.4168        | 405.2121        |
|         | 1096.4194       | 548.7133        | 10 | S [167] | 6  | 710.3484        | 355.6779        |
|         | 1193.4722       | 597.2397        | 11 | P       | 5  | 543.3501        | 272.1787        |
|         | 1280.5042       | 640.7557        | 12 | S       | 4  | 446.2973        | 223.6523        |
|         | 1379.5726       | 690.2899        | 13 | V       | 3  | 359.2653        | 180.1363        |
|         | 1492.6567       | 746.8320        | 14 | L       | 2  | 260.1969        | 130.6021        |
|         |                 |                 | 15 | K       | 1  | 147.1128        | 74.0600         |

# Annotated spectra from Saleem et. al. 2009

K.VLSLFT<sub>181</sub>EAIGK<sub>136</sub>G/2

0.8093

1e+04

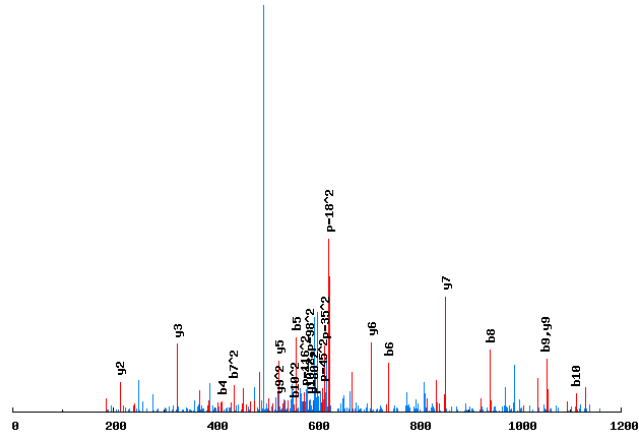

| Library | b <sup>1+</sup> | b <sup>2+</sup> | #  | AA     | #  | y <sup>1+</sup> | y <sup>2+</sup> |
|---------|-----------------|-----------------|----|--------|----|-----------------|-----------------|
|         | 100.0757        | 50.5415         | 1  | V      | 11 |                 |                 |
|         | 213.1598        | 107.0835        | 2  | L      | 10 | 1166.5948       | 583.8010        |
|         | 300.1918        | 150.5995        | 3  | S      | 9  | 1053.5107       | 527.2590        |
|         | 413.2758        | 207.1416        | 4  | L      | 8  | 966.4787        | 483.7430        |
|         | 560.3442        | 280.6758        | 5  | F      | 7  | 853.3946        | 427.2010        |
|         | 741.3583        | 371.1828        | 6  | T[181] | 6  | 706.3262        | 353.6668        |
|         | 870.4009        | 435.7041        | 7  | E      | 5  | 525.3122        | 263.1597        |
|         | 941.4380        | 471.2226        | 8  | A      | 4  | 396.2696        | 198.6385        |
|         | 1054.5220       | 527.7647        | 9  | I      | 3  | 325.2325        | 163.1199        |
|         | 1111.5435       | 556.2754        | 10 | G      | 2  | 212.1485        | 106.5779        |
|         |                 |                 | 11 | K[136] | 1  | 155.1270        | 78.0671         |

Annotated spectra from Saleem et. al. 2009

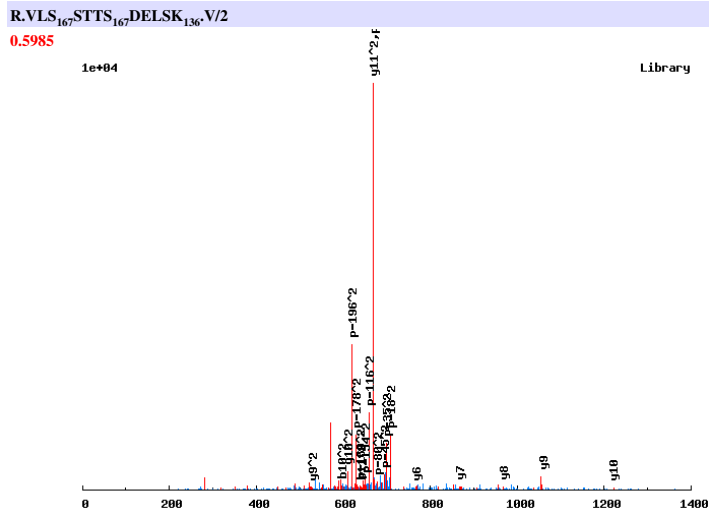

| Library | b <sup>1+</sup> | b <sup>2+</sup> | #  | AA     | #  | y <sup>1+</sup> | y <sup>2+</sup> |
|---------|-----------------|-----------------|----|--------|----|-----------------|-----------------|
|         | 100.0757        | 50.5415         | 1  | V      | 12 |                 |                 |
|         | 213.1598        | 107.0835        | 2  | L      | 11 | 1335.5208       | 668.2640        |
|         | 380.1581        | 190.5827        | 3  | S[167] | 10 | 1222.4367       | 611.7220        |
|         | 467.1901        | 234.0987        | 4  | S      | 9  | 1055.4384       | 528.2228        |
|         | 568.2378        | 284.6226        | 5  | T      | 8  | 968.4063        | 484.7068        |
|         | 669.2855        | 335.1464        | 6  | T      | 7  | 867.3587        | 434.1830        |
|         | 836.2839        | 418.6456        | 7  | S[167] | 6  | 766.3110        | 383.6591        |
|         | 951.3108        | 476.1590        | 8  | D      | 5  | 599.3126        | 300.1599        |
|         | 1080.3534       | 540.6803        | 9  | E      | 4  | 484.2857        | 242.6465        |
|         | 1193.4375       | 597.2224        | 10 | L      | 3  | 355.2431        | 178.1252        |
|         | 1280.4695       | 640.7384        | 11 | S      | 2  | 242.1590        | 121.5832        |
|         |                 |                 |    | K[136] | 1  | 155.1270        | 78.0671         |

# Annotated spectra from Saleem et. al. 2009

K.VLT<sub>181</sub>ENS<sub>167</sub>NELK<sub>136</sub>DTNNEGK<sub>136</sub>D/2

0.9988

1e+04

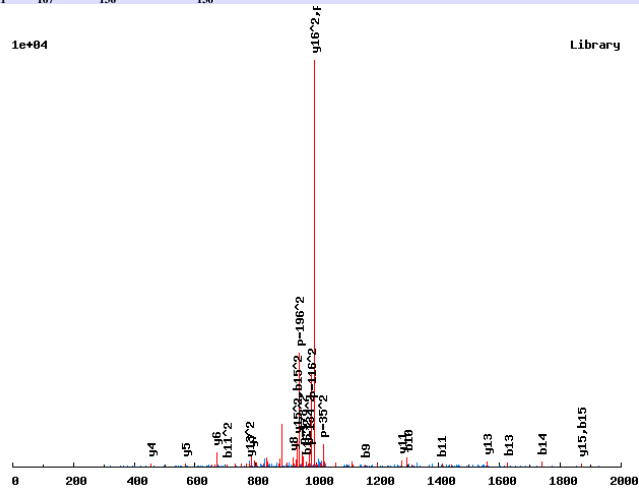

| Library | b <sup>1+</sup> | b <sup>2+</sup> | #  | AA     | #  | y <sup>1+</sup> | y <sup>2+</sup> |
|---------|-----------------|-----------------|----|--------|----|-----------------|-----------------|
|         | 100.0757        | 50.5415         | 1  | V      | 17 |                 |                 |
|         | 213.1598        | 107.0835        | 2  | L      | 16 | 1981.8122       | 991.4097        |
|         | 394.1738        | 197.5905        | 3  | T[181] | 15 | 1868.7282       | 934.8677        |
|         | 523.2164        | 262.1118        | 4  | E      | 14 | 1687.7141       | 844.3607        |
|         | 637.2593        | 319.1333        | 5  | N      | 13 | 1558.6716       | 779.8394        |
|         | 804.2576        | 402.6325        | 6  | S[167] | 12 | 1444.6286       | 722.8180        |
|         | 918.3006        | 459.6539        | 7  | N      | 11 | 1277.6303       | 639.3188        |
|         | 1047.3432       | 524.1752        | 8  | E      | 10 | 1163.5873       | 582.2973        |
|         | 1160.4272       | 580.7173        | 9  | L      | 9  | 1034.5447       | 517.7760        |
|         | 1296.5364       | 648.7718        | 10 | K[136] | 8  | 921.4607        | 461.2340        |
|         | 1411.5633       | 706.2853        | 11 | D      | 7  | 785.3515        | 393.1794        |
|         | 1512.6110       | 756.8091        | 12 | T      | 6  | 670.3246        | 335.6659        |
|         | 1626.6539       | 813.8306        | 13 | N      | 5  | 569.2769        | 285.1421        |
|         | 1740.6969       | 870.8521        | 14 | N      | 4  | 455.2340        | 228.1206        |
|         | 1869.7395       | 935.3734        | 15 | E      | 3  | 341.1910        | 171.0992        |
|         | 1926.7609       | 963.8841        | 16 | G      | 2  | 212.1485        | 106.5779        |
|         |                 |                 | 17 | K[136] | 1  | 155.1270        | 78.0671         |

# Annotated spectra from Saleem et. al. 2009

R.VLT<sub>181</sub>HDGTLNDYFNK.H/2

0.9999

1e+04

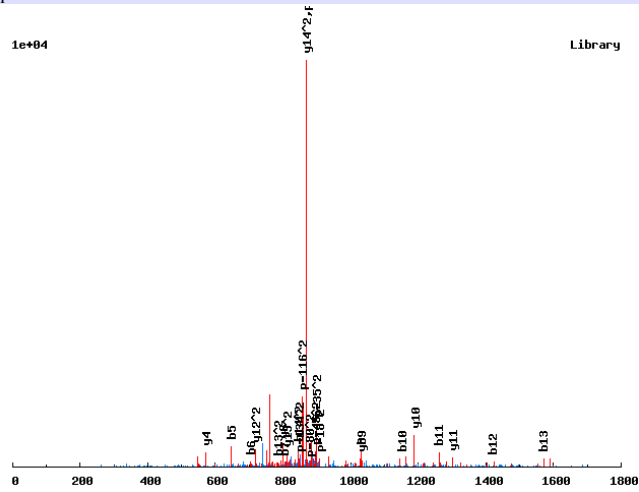

| Library | b <sup>1+</sup> | b <sup>2+</sup> | #  | AA     | #  | y <sup>1+</sup> | y <sup>2+</sup> |
|---------|-----------------|-----------------|----|--------|----|-----------------|-----------------|
|         | 100.0757        | 50.5415         | 1  | V      | 15 |                 |                 |
|         | 213.1598        | 107.0835        | 2  | L      | 14 | 1732.7214       | 866.8643        |
|         | 394.1738        | 197.5905        | 3  | T[181] | 13 | 1619.6373       | 810.3223        |
|         | 531.2327        | 266.1200        | 4  | H      | 12 | 1438.6233       | 719.8153        |
|         | 646.2596        | 323.6334        | 5  | D      | 11 | 1301.5644       | 651.2858        |
|         | 703.2811        | 352.1442        | 6  | G      | 10 | 1186.5375       | 593.7724        |
|         | 804.3288        | 402.6680        | 7  | T      | 9  | 1129.5160       | 565.2616        |
|         | 917.4128        | 459.2100        | 8  | L      | 8  | 1028.4683       | 514.7378        |
|         | 1032.4398       | 516.7235        | 9  | D      | 7  | 915.3843        | 458.1958        |
|         | 1146.4827       | 573.7450        | 10 | N      | 6  | 800.3573        | 400.6823        |
|         | 1261.5096       | 631.2585        | 11 | D      | 5  | 686.3144        | 343.6608        |
|         | 1424.5730       | 712.7901        | 12 | Y      | 4  | 571.2875        | 286.1474        |
|         | 1571.6414       | 786.3243        | 13 | F      | 3  | 408.2241        | 204.6157        |
|         | 1685.6843       | 843.3458        | 14 | N      | 2  | 261.1557        | 131.0815        |
|         |                 |                 | 15 | K      | 1  | 147.1128        | 74.0600         |



# Annotated spectra from Saleem et. al. 2009

R.VNDSYDSPLS<sub>167</sub>GT<sub>181</sub>ASTGK.T/2

1

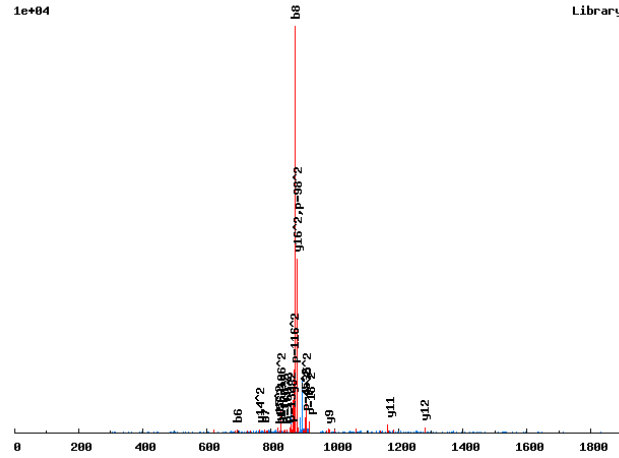

| Library | b <sup>1+</sup> | b <sup>2+</sup> | #  | AA      | #  | y <sup>1+</sup> | y <sup>2+</sup> |
|---------|-----------------|-----------------|----|---------|----|-----------------|-----------------|
|         | 100.0757        | 50.5415         | 1  | V       | 17 |                 |                 |
|         | 214.1186        | 107.5630        | 2  | N       | 16 | 1759.6459       | 880.3266        |
|         | 329.1456        | 165.0764        | 3  | D       | 15 | 1645.6030       | 823.3051        |
|         | 416.1776        | 208.5924        | 4  | S       | 14 | 1530.5761       | 765.7917        |
|         | 579.2409        | 290.1241        | 5  | Y       | 13 | 1443.5440       | 722.2757        |
|         | 694.2679        | 347.6376        | 6  | D       | 12 | 1280.4807       | 640.7440        |
|         | 781.2999        | 391.1536        | 7  | S       | 11 | 1165.4538       | 583.2305        |
|         | 878.3527        | 439.6800        | 8  | P       | 10 | 1078.4217       | 539.7145        |
|         | 991.4367        | 496.2220        | 9  | L       | 9  | 981.3690        | 491.1881        |
|         | 1158.4351       | 579.7212        | 10 | S [167] | 8  | 868.2849        | 434.6461        |
|         | 1215.4565       | 608.2319        | 11 | G       | 7  | 701.2866        | 351.1469        |
|         | 1396.4705       | 698.7389        | 12 | T [181] | 6  | 644.2651        | 322.6362        |
|         | 1467.5077       | 734.2575        | 13 | A       | 5  | 463.2511        | 232.1292        |
|         | 1554.5397       | 777.7735        | 14 | S       | 4  | 392.2140        | 196.6106        |
|         | 1655.5874       | 828.2973        | 15 | T       | 3  | 305.1819        | 153.0946        |
|         | 1712.6088       | 856.8081        | 16 | G       | 2  | 204.1343        | 102.5708        |
|         |                 |                 | 17 | K       | 1  | 147.1128        | 74.0600         |

# Annotated spectra from Saleem et. al. 2009

R.VNDSYDS<sub>167</sub>PLS<sub>167</sub>GTAST<sub>181</sub>GK<sub>136</sub>T/2

0.9409

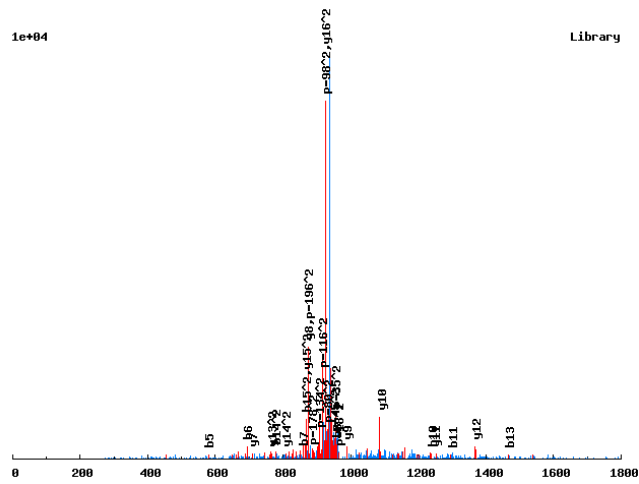

| Library | b <sup>1+</sup> | b <sup>2+</sup> | #  | AA     | #  | y <sup>1+</sup> | y <sup>2+</sup> |
|---------|-----------------|-----------------|----|--------|----|-----------------|-----------------|
|         | 100.0757        | 50.5415         | 1  | V      | 17 |                 |                 |
|         | 214.1186        | 107.5630        | 2  | N      | 16 | 1847.6265       | 924.3169        |
|         | 329.1456        | 165.0764        | 3  | D      | 15 | 1733.5835       | 867.2954        |
|         | 416.1776        | 208.5924        | 4  | S      | 14 | 1618.5566       | 809.7819        |
|         | 579.2409        | 290.1241        | 5  | Y      | 13 | 1531.5246       | 766.2659        |
|         | 694.2679        | 347.6376        | 6  | D      | 12 | 1368.4612       | 684.7343        |
|         | 861.2662        | 431.1368        | 7  | S[167] | 11 | 1253.4343       | 627.2208        |
|         | 958.3190        | 479.6631        | 8  | P      | 10 | 1086.4359       | 543.7216        |
|         | 1071.4030       | 536.2052        | 9  | L      | 9  | 989.3832        | 495.1952        |
|         | 1238.4014       | 619.7043        | 10 | S[167] | 8  | 876.2991        | 438.6532        |
|         | 1295.4229       | 648.2151        | 11 | G      | 7  | 709.3008        | 355.1540        |
|         | 1396.4705       | 698.7389        | 12 | T      | 6  | 652.2793        | 326.6433        |
|         | 1467.5077       | 734.2575        | 13 | A      | 5  | 551.2316        | 276.1194        |
|         | 1554.5397       | 777.7735        | 14 | S      | 4  | 480.1945        | 240.6009        |
|         | 1735.5537       | 868.2805        | 15 | T[181] | 3  | 393.1625        | 197.0849        |
|         | 1792.5752       | 896.7912        | 16 | G      | 2  | 212.1485        | 106.5779        |
|         |                 |                 | 17 | K[136] | 1  | 155.1270        | 78.0671         |

# Annotated spectra from Saleem et. al. 2009

R.VNENT<sub>181</sub>PEQWK<sub>136</sub>K<sub>136</sub>E/2

0.6663

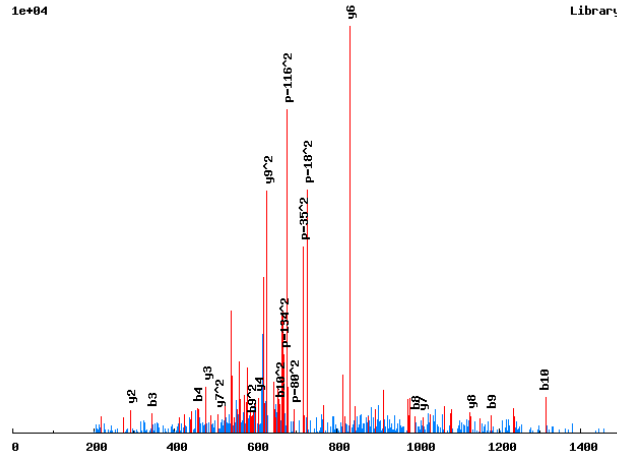

| Library | b <sup>1+</sup> | b <sup>2+</sup> | #  | AA     | #  | y <sup>1+</sup> | y <sup>2+</sup> |
|---------|-----------------|-----------------|----|--------|----|-----------------|-----------------|
|         | 100.0757        | 50.5415         | 1  | V      | 11 |                 |                 |
|         | 214.1186        | 107.5630        | 2  | N      | 10 | 1369.6119       | 685.3096        |
|         | 343.1612        | 172.0842        | 3  | E      | 9  | 1255.5689       | 628.2881        |
|         | 457.2041        | 229.1057        | 4  | N      | 8  | 1126.5263       | 563.7668        |
|         | 638.2182        | 319.6127        | 5  | T[181] | 7  | 1012.4834       | 506.7453        |
|         | 735.2709        | 368.1391        | 6  | P      | 6  | 831.4694        | 416.2383        |
|         | 864.3135        | 432.6604        | 7  | E      | 5  | 734.4166        | 367.7120        |
|         | 992.3721        | 496.6897        | 8  | Q      | 4  | 605.3740        | 303.1907        |
|         | 1178.4514       | 589.7293        | 9  | W      | 3  | 477.3155        | 239.1614        |
|         | 1314.5605       | 657.7839        | 10 | K[136] | 2  | 291.2362        | 146.1217        |
|         |                 |                 | 11 | K[136] | 1  | 155.1270        | 78.0671         |

# Annotated spectra from Saleem et. al. 2009

K.VNHEL<sub>S</sub><sub>167</sub>-S<sub>167</sub>DDDDVPLS<sub>Q</sub>TLK<sub>136</sub>-K/2

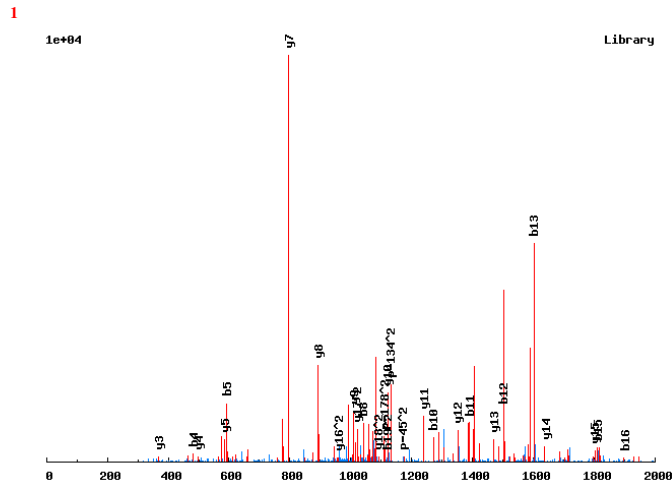

| Library | b <sup>1+</sup> | b <sup>2+</sup> | #  | AA     | #  | y <sup>1+</sup> | y <sup>2+</sup> |
|---------|-----------------|-----------------|----|--------|----|-----------------|-----------------|
|         | 100.0757        | 50.5415         | 1  | V      | 20 |                 |                 |
|         | 214.1186        | 107.5630        | 2  | N      | 19 | 2295.9145       | 1148.4609       |
|         | 351.1775        | 176.0924        | 3  | H      | 18 | 2181.8716       | 1091.4394       |
|         | 480.2201        | 240.6137        | 4  | E      | 17 | 2044.8127       | 1022.9100       |
|         | 593.3042        | 297.1557        | 5  | L      | 16 | 1915.7701       | 958.3887        |
|         | 760.3025        | 380.6549        | 6  | S[167] | 15 | 1802.6860       | 901.8466        |
|         | 927.3009        | 464.1541        | 7  | S[167] | 14 | 1635.6876       | 818.3475        |
|         | 1042.3278       | 521.6676        | 8  | D      | 13 | 1468.6893       | 734.8483        |
|         | 1157.3548       | 579.1810        | 9  | D      | 12 | 1353.6623       | 677.3348        |
|         | 1272.3817       | 636.6945        | 10 | D      | 11 | 1238.6354       | 619.8213        |
|         | 1387.4087       | 694.2080        | 11 | D      | 10 | 1123.6085       | 562.3079        |
|         | 1502.4356       | 751.7214        | 12 | D      | 9  | 1008.5815       | 504.7944        |
|         | 1601.5040       | 801.2556        | 13 | V      | 8  | 893.5546        | 447.2809        |
|         | 1698.5568       | 849.7820        | 14 | P      | 7  | 794.4862        | 397.7467        |
|         | 1811.6408       | 906.3241        | 15 | L      | 6  | 697.4334        | 349.2203        |
|         | 1898.6729       | 949.8401        | 16 | S      | 5  | 584.3493        | 292.6783        |
|         | 2026.7314       | 1013.8694       | 17 | Q      | 4  | 497.3173        | 249.1623        |
|         | 2127.7791       | 1064.3932       | 18 | T      | 3  | 369.2587        | 185.1330        |
|         | 2240.8632       | 1120.9352       | 19 | L      | 2  | 268.2111        | 134.6092        |
|         |                 |                 | 20 | K[136] | 1  | 155.1270        | 78.0671         |

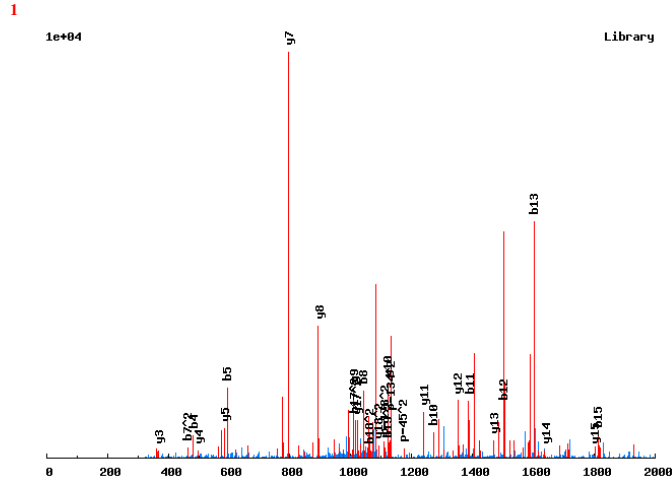

| Library | b <sup>1+</sup> | b <sup>2+</sup> | #  | AA     | #  | y <sup>1+</sup> | y <sup>2+</sup> |
|---------|-----------------|-----------------|----|--------|----|-----------------|-----------------|
|         | 100.0757        | 50.5415         | 1  | V      | 20 |                 |                 |
|         | 214.1186        | 107.5630        | 2  | N      | 19 | 2295.9145       | 1148.4609       |
|         | 351.1775        | 176.0924        | 3  | H      | 18 | 2181.8716       | 1091.4394       |
|         | 480.2201        | 240.6137        | 4  | E      | 17 | 2044.8127       | 1022.9100       |
|         | 593.3042        | 297.1557        | 5  | L      | 16 | 1915.7701       | 958.3887        |
|         | 760.3025        | 380.6549        | 6  | S[167] | 15 | 1802.6860       | 901.8466        |
|         | 927.3009        | 464.1541        | 7  | S[167] | 14 | 1635.6876       | 818.3475        |
|         | 1042.3278       | 521.6676        | 8  | D      | 13 | 1468.6893       | 734.8483        |
|         | 1157.3548       | 579.1810        | 9  | D      | 12 | 1353.6623       | 677.3348        |
|         | 1272.3817       | 636.6945        | 10 | D      | 11 | 1238.6354       | 619.8213        |
|         | 1387.4087       | 694.2080        | 11 | D      | 10 | 1123.6085       | 562.3079        |
|         | 1502.4356       | 751.7214        | 12 | D      | 9  | 1008.5815       | 504.7944        |
|         | 1601.5040       | 801.2556        | 13 | V      | 8  | 893.5546        | 447.2809        |
|         | 1698.5568       | 849.7820        | 14 | P      | 7  | 794.4862        | 397.7467        |
|         | 1811.6408       | 906.3241        | 15 | L      | 6  | 697.4334        | 349.2203        |
|         | 1898.6729       | 949.8401        | 16 | S      | 5  | 584.3493        | 292.6783        |
|         | 2026.7314       | 1013.8694       | 17 | Q      | 4  | 497.3173        | 249.1623        |
|         | 2127.7791       | 1064.3932       | 18 | T      | 3  | 369.2587        | 185.1330        |
|         | 2240.8632       | 1120.9352       | 19 | L      | 2  | 268.2111        | 134.6092        |
|         |                 |                 | 20 | K[136] | 1  | 155.1270        | 78.0671         |

# Annotated spectra from Saleem et. al. 2009

R.VNS<sub>167</sub>R<sub>166</sub>GS<sub>167</sub>LTDIPIFSDAK<sub>136</sub>Q/2

0.9998

1e+04

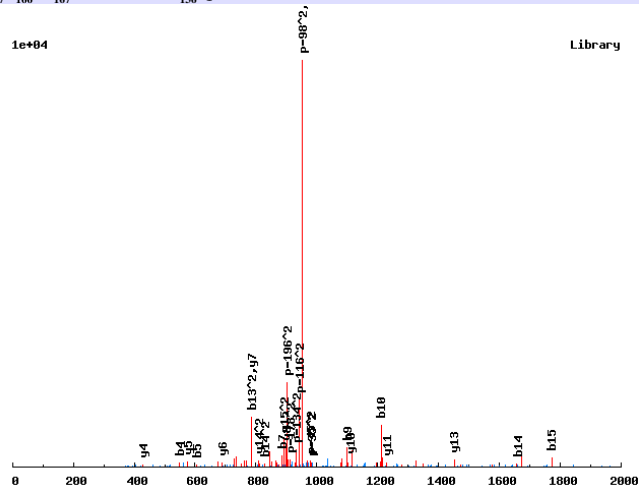

| Library | b <sup>1+</sup> | b <sup>2+</sup> | #  | AA     | #  | y <sup>1+</sup> | y <sup>2+</sup> |
|---------|-----------------|-----------------|----|--------|----|-----------------|-----------------|
|         | 100.0757        | 50.5415         | 1  | V      | 17 |                 |                 |
|         | 214.1186        | 107.5630        | 2  | N      | 16 | 1898.8415       | 949.9244        |
|         | 381.1170        | 191.0621        | 3  | S[167] | 15 | 1784.7986       | 892.9029        |
|         | 547.2264        | 274.1168        | 4  | R[166] | 14 | 1617.8002       | 809.4038        |
|         | 604.2478        | 302.6276        | 5  | G      | 13 | 1451.6909       | 726.3491        |
|         | 771.2462        | 386.1267        | 6  | S[167] | 12 | 1394.6694       | 697.8383        |
|         | 884.3302        | 442.6688        | 7  | L      | 11 | 1227.6710       | 614.3392        |
|         | 985.3779        | 493.1926        | 8  | T      | 10 | 1114.5870       | 557.7971        |
|         | 1100.4049       | 550.7061        | 9  | D      | 9  | 1013.5393       | 507.2733        |
|         | 1213.4889       | 607.2481        | 10 | I      | 8  | 898.5124        | 449.7598        |
|         | 1310.5417       | 655.7745        | 11 | P      | 7  | 785.4283        | 393.2178        |
|         | 1423.6257       | 712.3165        | 12 | I      | 6  | 688.3755        | 344.6914        |
|         | 1570.6942       | 785.8507        | 13 | F      | 5  | 575.2915        | 288.1494        |
|         | 1657.7262       | 829.3667        | 14 | S      | 4  | 428.2231        | 214.6152        |
|         | 1772.7531       | 886.8802        | 15 | D      | 3  | 341.1910        | 171.0992        |
|         | 1843.7902       | 922.3988        | 16 | A      | 2  | 226.1641        | 113.5857        |
|         |                 |                 | 17 | K[136] | 1  | 155.1270        | 78.0671         |

# Annotated spectra from Saleem et. al. 2009

R.VNS<sub>167</sub>SNS<sub>167</sub>MYTAER.I/2

0.9995

1e+04

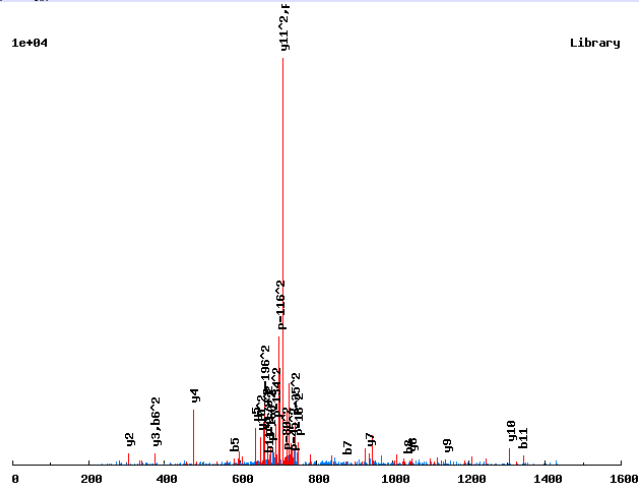

| Library | b <sup>1+</sup> | b <sup>2+</sup> | #  | AA     | #  | y <sup>1+</sup> | y <sup>2+</sup> |
|---------|-----------------|-----------------|----|--------|----|-----------------|-----------------|
|         | 100.0757        | 50.5415         | 1  | V      | 12 |                 |                 |
|         | 214.1186        | 107.5630        | 2  | N      | 11 | 1419.4648       | 710.2360        |
|         | 381.1170        | 191.0621        | 3  | S[167] | 10 | 1305.4218       | 653.2146        |
|         | 468.1490        | 234.5781        | 4  | S      | 9  | 1138.4235       | 569.7154        |
|         | 582.1919        | 291.5996        | 5  | N      | 8  | 1051.3914       | 526.1994        |
|         | 749.1903        | 375.0988        | 6  | S[167] | 7  | 937.3485        | 469.1779        |
|         | 880.2308        | 440.6190        | 7  | M      | 6  | 770.3502        | 385.6787        |
|         | 1043.2941       | 522.1507        | 8  | Y      | 5  | 639.3097        | 320.1585        |
|         | 1144.3418       | 572.6745        | 9  | T      | 4  | 476.2463        | 238.6268        |
|         | 1215.3789       | 608.1931        | 10 | A      | 3  | 375.1986        | 188.1030        |
|         | 1344.4215       | 672.7144        | 11 | E      | 2  | 304.1615        | 152.5844        |
|         |                 |                 | 12 | R      | 1  | 175.1190        | 88.0631         |

# Annotated spectra from Saleem et. al. 2009

R.VNS<sub>167</sub>SS<sub>167</sub>TIRLPTLK.Q/2

0.9619

1e+04

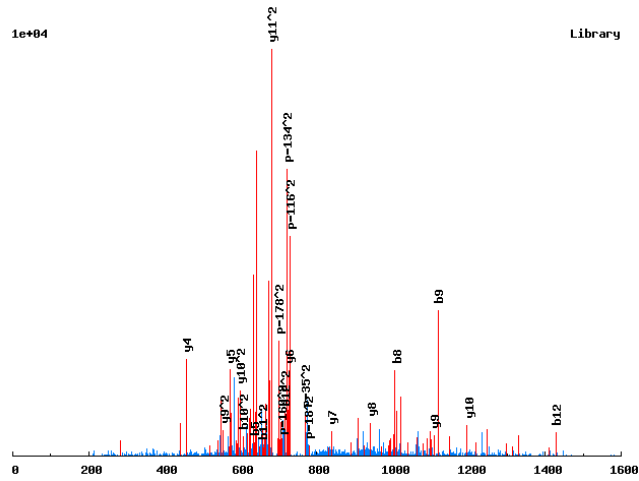

| Library | b <sup>1+</sup> | b <sup>2+</sup> | #  | AA     | #  | y <sup>1+</sup> | y <sup>2+</sup> |
|---------|-----------------|-----------------|----|--------|----|-----------------|-----------------|
|         | 100.0757        | 50.5415         | 1  | V      | 13 |                 |                 |
|         | 214.1186        | 107.5630        | 2  | N      | 12 | 1476.6859       | 738.8466        |
|         | 381.1170        | 191.0621        | 3  | S[167] | 11 | 1362.6430       | 681.8251        |
|         | 468.1490        | 234.5781        | 4  | S      | 10 | 1195.6446       | 598.3259        |
|         | 635.1474        | 318.0773        | 5  | S[167] | 9  | 1108.6126       | 554.8099        |
|         | 736.1951        | 368.6012        | 6  | T      | 8  | 941.6142        | 471.3107        |
|         | 849.2791        | 425.1432        | 7  | I      | 7  | 840.5665        | 420.7869        |
|         | 1005.3802       | 503.1938        | 8  | R      | 6  | 727.4825        | 364.2449        |
|         | 1118.4643       | 559.7358        | 9  | L      | 5  | 571.3814        | 286.1943        |
|         | 1215.5170       | 608.2622        | 10 | P      | 4  | 458.2973        | 229.6523        |
|         | 1316.5647       | 658.7860        | 11 | T      | 3  | 361.2445        | 181.1259        |
|         | 1429.6488       | 715.3280        | 12 | L      | 2  | 260.1969        | 130.6021        |
|         |                 |                 | 13 | K      | 1  | 147.1128        | 74.0600         |

# Annotated spectra from Saleem et. al. 2009

R.VNS<sub>167</sub>VR<sub>166</sub>S<sub>167</sub>NAS<sub>167</sub>SR<sub>166</sub>GGSEGDGATK<sub>136</sub>K/2

0.9842

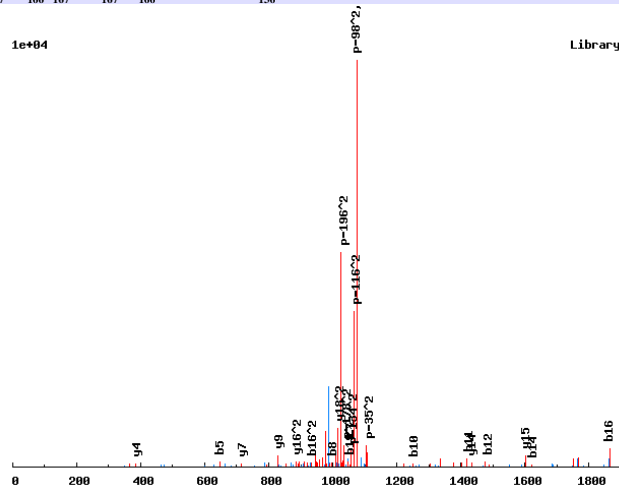

| Library | b <sup>1+</sup> | b <sup>2+</sup> | #  | AA     | #  | y <sup>1+</sup> | y <sup>2+</sup> |
|---------|-----------------|-----------------|----|--------|----|-----------------|-----------------|
|         | 100.0757        | 50.5415         | 1  | V      | 20 |                 |                 |
|         | 214.1186        | 107.5630        | 2  | N      | 19 | 2147.8150       | 1074.4111       |
|         | 381.1170        | 191.0621        | 3  | S[167] | 18 | 2033.7720       | 1017.3897       |
|         | 480.1854        | 240.5963        | 4  | V      | 17 | 1866.7737       | 933.8905        |
|         | 646.2948        | 323.6510        | 5  | R[166] | 16 | 1767.7053       | 884.3563        |
|         | 813.2931        | 407.1502        | 6  | S[167] | 15 | 1601.5959       | 801.3016        |
|         | 927.3361        | 464.1717        | 7  | N      | 14 | 1434.5975       | 717.8024        |
|         | 998.3732        | 499.6902        | 8  | A      | 13 | 1320.5546       | 660.7809        |
|         | 1165.3715       | 583.1894        | 9  | S[167] | 12 | 1249.5175       | 625.2624        |
|         | 1252.4036       | 626.7054        | 10 | S      | 11 | 1082.5191       | 541.7632        |
|         | 1418.5129       | 709.7601        | 11 | R[166] | 10 | 995.4871        | 498.2472        |
|         | 1475.5344       | 738.2708        | 12 | G      | 9  | 829.3777        | 415.1925        |
|         | 1532.5559       | 766.7816        | 13 | G      | 8  | 772.3563        | 386.6818        |
|         | 1619.5879       | 810.2976        | 14 | S      | 7  | 715.3348        | 358.1710        |
|         | 1748.6305       | 874.8189        | 15 | E      | 6  | 628.3028        | 314.6550        |
|         | 1863.6574       | 932.3324        | 16 | D      | 5  | 499.2602        | 250.1337        |
|         | 1920.6789       | 960.8431        | 17 | G      | 4  | 384.2332        | 192.6203        |
|         | 1991.7160       | 996.3616        | 18 | A      | 3  | 327.2118        | 164.1095        |
|         | 2092.7637       | 1046.8855       | 19 | T      | 2  | 256.1747        | 128.5910        |
|         |                 |                 | 20 | K[136] | 1  | 155.1270        | 78.0671         |



# Annotated spectra from Saleem et. al. 2009

R.VPSLVATSES<sub>167</sub>PR.A/2

1

1e+04

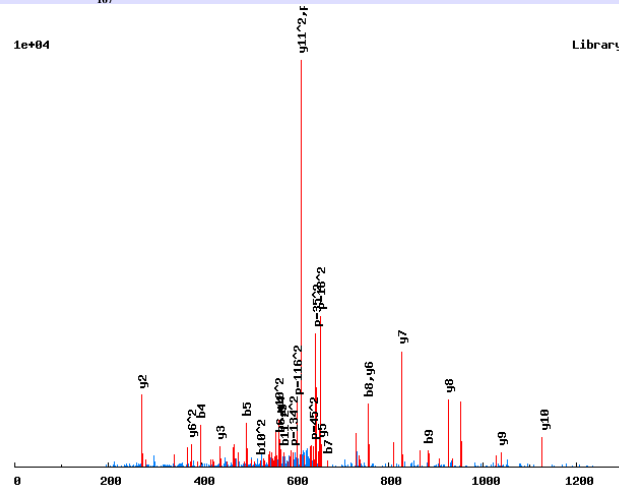

| Library | b <sup>1+</sup> | b <sup>2+</sup> | #  | AA      | #  | y <sup>1+</sup> | y <sup>2+</sup> |
|---------|-----------------|-----------------|----|---------|----|-----------------|-----------------|
|         | 100.0757        | 50.5415         | 1  | V       | 12 |                 |                 |
|         | 197.1285        | 99.0679         | 2  | P       | 11 | 1223.5667       | 612.2870        |
|         | 284.1605        | 142.5839        | 3  | S       | 10 | 1126.5140       | 563.7606        |
|         | 397.2445        | 199.1259        | 4  | L       | 9  | 1039.4820       | 520.2446        |
|         | 496.3129        | 248.6601        | 5  | V       | 8  | 926.3979        | 463.7026        |
|         | 567.3501        | 284.1787        | 6  | A       | 7  | 827.3295        | 414.1684        |
|         | 668.3977        | 334.7025        | 7  | T       | 6  | 756.2924        | 378.6498        |
|         | 755.4298        | 378.2185        | 8  | S       | 5  | 655.2447        | 328.1260        |
|         | 884.4724        | 442.7398        | 9  | E       | 4  | 568.2127        | 284.6100        |
|         | 1051.4707       | 526.2390        | 10 | S [167] | 3  | 439.1701        | 220.0887        |
|         | 1148.5235       | 574.7654        | 11 | P       | 2  | 272.1717        | 136.5895        |
|         |                 |                 | 12 | R       | 1  | 175.1190        | 88.0631         |

# Annotated spectra from Saleem et. al. 2009

K.VPT<sub>181</sub>VGSYGVAGAT<sub>181</sub>LPETIPTS<sub>136</sub>N/3

0.9908

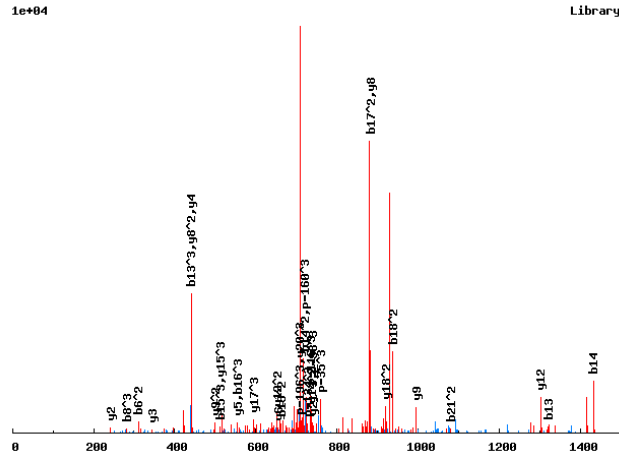

| Library | b <sup>1+</sup>  | b <sup>2+</sup>  | b <sup>3+</sup> | #  | AA     | #  | y <sup>1+</sup>  | y <sup>2+</sup> | y <sup>3+</sup> |
|---------|------------------|------------------|-----------------|----|--------|----|------------------|-----------------|-----------------|
|         | 100.0757         | 50.5415          | 34.0301         | 1  | V      | 22 |                  |                 |                 |
|         | 197.1285         | 99.0679          | 66.3810         | 2  | P      | 21 | 2214.0222        | 1107.5147       | <b>738.6789</b> |
|         | 378.1425         | 189.5749         | 126.7190        | 3  | T[181] | 20 | 2116.9694        | 1058.9884       | <b>706.3280</b> |
|         | 477.2109         | 239.1091         | 159.7418        | 4  | V      | 19 | 1935.9554        | 968.4813        | 645.9900        |
|         | 534.2323         | 267.6198         | 178.7490        | 5  | G      | 18 | 1836.8870        |                 | <b>918.9471</b> |
|         | 621.2644         | <b>311.1358</b>  | 207.7596        | 6  | S      | 17 | 1779.8655        | 890.4364        | <b>593.9600</b> |
|         | 784.3277         | 392.6675         | 262.1141        | 7  | Y      | 16 | 1692.8335        | 846.9204        | 564.9494        |
|         | 841.3492         | 421.1782         | <b>281.1212</b> | 8  | G      | 15 | 1529.7702        | 765.3887        | <b>510.5949</b> |
|         | 940.4176         | 470.7124         | 314.1440        | 9  | V      | 14 | 1472.7487        |                 | <b>736.8780</b> |
|         | 1011.4547        | 506.2310         | 337.8231        | 10 | A      | 13 | 1373.6803        | 687.3438        | 458.5650        |
|         | 1068.4761        | 534.7417         | 356.8302        | 11 | G      | 12 | <b>1302.6432</b> | <b>651.8252</b> | 434.8859        |
|         | 1139.5132        | 570.2603         | 380.5093        | 12 | A      | 11 | 1245.6217        | 623.3145        | 415.8788        |
|         | <b>1320.5273</b> | <b>660.7673</b>  | <b>440.8473</b> | 13 | T[181] | 10 | 1174.5846        | 587.7960        | 392.1997        |
|         | <b>1433.6113</b> | <b>717.3093</b>  | 478.5420        | 14 | L      | 9  | <b>993.5706</b>  | <b>497.2889</b> | 331.8617        |
|         | 1530.6641        | 765.8357         | <b>510.8929</b> | 15 | P      | 8  | <b>880.4866</b>  | <b>440.7469</b> | 294.1670        |
|         | 1659.7067        | 830.3570         | <b>553.9071</b> | 16 | E      | 7  | 783.4338         | 392.2205        | 261.8161        |
|         | 1760.7543        | <b>880.8808</b>  | 587.5896        | 17 | T      | 6  | <b>654.3912</b>  | 327.6992        | 218.8019        |
|         | 1873.8384        | <b>937.4228</b>  | 625.2843        | 18 | I      | 5  | <b>553.3435</b>  | 277.1754        | 185.1194        |
|         | 1970.8912        | 985.9492         | 657.6352        | 19 | P      | 4  | <b>440.2595</b>  | 220.6334        | 147.4247        |
|         | 2071.9388        | 1036.4731        | 691.3178        | 20 | T      | 3  | <b>343.2067</b>  | 172.1070        | 115.0738        |
|         | 2158.9709        | <b>1079.9891</b> | 720.3285        | 21 | S      | 2  | <b>242.1590</b>  | 121.5832        | 81.3912         |
|         |                  |                  |                 | 22 | K[136] | 1  | 155.1270         | 78.0671         | 52.3805         |

# Annotated spectra from Saleem et. al. 2009

K.VPVS<sub>167</sub>AAAT<sub>181</sub>PSLNK.T/2

0.9803

1e+04

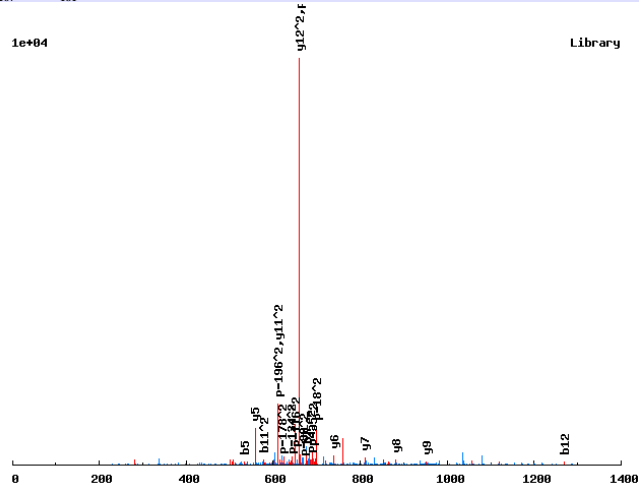

| Library | b <sup>1+</sup> | b <sup>2+</sup> | #  | AA     | #  | y <sup>1+</sup> | y <sup>2+</sup> |
|---------|-----------------|-----------------|----|--------|----|-----------------|-----------------|
|         | 100.0757        | 50.5415         | 1  | V      | 13 |                 |                 |
|         | 197.1285        | 99.0679         | 2  | P      | 12 | 1315.5695       | 658.2884        |
|         | 296.1969        | 148.6021        | 3  | V      | 11 | 1218.5167       | 609.7620        |
|         | 463.1952        | 232.1013        | 4  | S[167] | 10 | 1119.4483       | 560.2278        |
|         | 534.2323        | 267.6198        | 5  | A      | 9  | 952.4499        | 476.7286        |
|         | 605.2694        | 303.1384        | 6  | A      | 8  | 881.4128        | 441.2100        |
|         | 676.3066        | 338.6569        | 7  | A      | 7  | 810.3757        | 405.6915        |
|         | 857.3206        | 429.1639        | 8  | T[181] | 6  | 739.3386        | 370.1729        |
|         | 954.3733        | 477.6903        | 9  | P      | 5  | 558.3246        | 279.6659        |
|         | 1041.4054       | 521.2063        | 10 | S      | 4  | 461.2718        | 231.1395        |
|         | 1154.4894       | 577.7483        | 11 | L      | 3  | 374.2398        | 187.6235        |
|         | 1268.5323       | 634.7698        | 12 | N      | 2  | 261.1557        | 131.0815        |
|         |                 |                 | 13 | K      | 1  | 147.1128        | 74.0600         |

# Annotated spectra from Saleem et. al. 2009

K.VPVSSIT<sub>181</sub>S<sub>167</sub>HAK.E/2

0.9017

1e+04

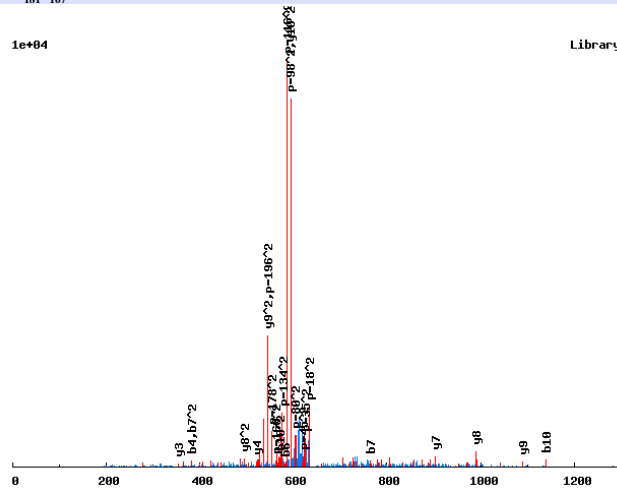

| Library | b <sup>1+</sup> | b <sup>2+</sup> | #  | AA     | #  | y <sup>1+</sup> | y <sup>2+</sup> |
|---------|-----------------|-----------------|----|--------|----|-----------------|-----------------|
|         | 100.0757        | 50.5415         | 1  | V      | 11 |                 |                 |
|         | 197.1285        | 99.0679         | 2  | P      | 10 | 1186.4905       | 593.7489        |
|         | 296.1969        | 148.6021        | 3  | V      | 9  | 1089.4377       | 545.2225        |
|         | 383.2289        | 192.1181        | 4  | S      | 8  | 990.3693        | 495.6883        |
|         | 470.2609        | 235.6341        | 5  | S      | 7  | 903.3373        | 452.1723        |
|         | 583.3450        | 292.1761        | 6  | I      | 6  | 816.3053        | 408.6563        |
|         | 764.3590        | 382.6831        | 7  | T[181] | 5  | 703.2212        | 352.1142        |
|         | 931.3574        | 466.1823        | 8  | S[167] | 4  | 522.2072        | 261.6072        |
|         | 1068.4163       | 534.7118        | 9  | H      | 3  | 355.2088        | 178.1080        |
|         | 1139.4534       | 570.2303        | 10 | A      | 2  | 218.1499        | 109.5786        |
|         |                 |                 | 11 | K      | 1  | 147.1128        | 74.0600         |

# Annotated spectra from Saleem et. al. 2009

K.VR<sub>166</sub>NS<sub>167</sub>DLEDESLK<sub>136</sub>K<sub>136</sub>E/3  
 0.6447

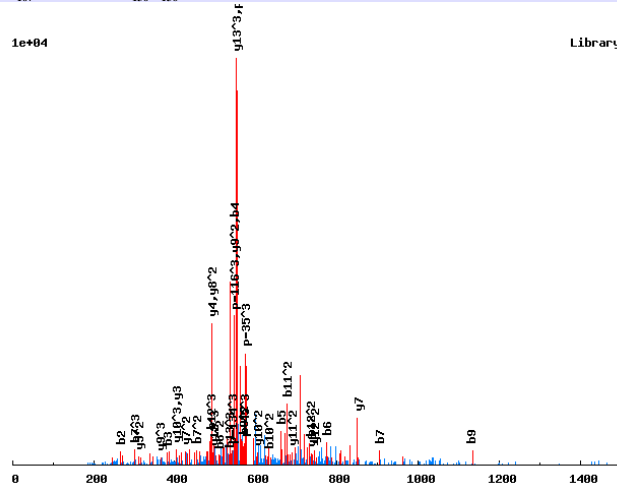

| Library | b <sup>1+</sup> | b <sup>2+</sup> | b <sup>3+</sup> | #  | AA     | #  | y <sup>1+</sup> | y <sup>2+</sup> | y <sup>3+</sup> |
|---------|-----------------|-----------------|-----------------|----|--------|----|-----------------|-----------------|-----------------|
|         | 100.0757        | 50.5415         | 34.0301         | 1  | V      | 14 |                 |                 |                 |
|         | 266.1851        | 133.5962        | 89.3999         | 2  | R[166] | 13 | 1654.7530       | 827.8801        | 552.2558        |
|         | 380.2280        | 190.6176        | 127.4142        | 3  | N      | 12 | 1488.6436       | 744.8254        | 496.8861        |
|         | 547.2264        | 274.1168        | 183.0803        | 4  | S[167] | 11 | 1374.6007       | 687.8040        | 458.8717        |
|         | 662.2533        | 331.6303        | 221.4226        | 5  | D      | 10 | 1207.6023       | 604.3048        | 403.2056        |
|         | 775.3374        | 388.1723        | 259.1173        | 6  | L      | 9  | 1092.5754       | 546.7913        | 364.8633        |
|         | 904.3800        | 452.6936        | 302.1315        | 7  | E      | 8  | 979.4913        | 490.2493        | 327.1686        |
|         | 1019.4069       | 510.2071        | 340.4738        | 8  | D      | 7  | 850.4487        | 425.7280        | 284.1544        |
|         | 1134.4338       | 567.7206        | 378.8161        | 9  | D      | 6  | 735.4218        | 368.2145        | 245.8121        |
|         | 1263.4764       | 632.2419        | 421.8303        | 10 | E      | 5  | 620.3948        | 310.7011        | 207.4698        |
|         | 1350.5085       | 675.7579        | 450.8410        | 11 | S      | 4  | 491.3522        | 246.1798        | 164.4556        |
|         | 1463.5925       | 732.2999        | 488.5357        | 12 | L      | 3  | 404.3202        | 202.6637        | 135.4449        |
|         | 1599.7017       | 800.3545        | 533.9054        | 13 | K[136] | 2  | 291.2362        | 146.1217        | 97.7502         |
|         |                 |                 |                 | 14 | K[136] | 1  | 155.1270        | 78.0671         | 52.3805         |

# Annotated spectra from Saleem et. al. 2009

R.VRQPAS<sub>167</sub>-NSGS<sub>167</sub>-PIK.S/2

0.9956

1e+04

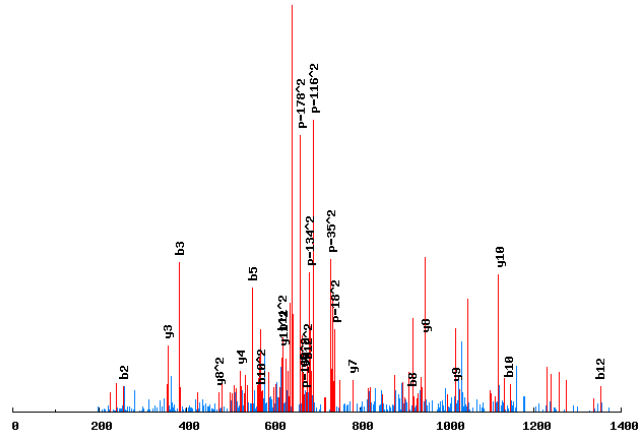

| Library | b <sup>1+</sup> | b <sup>2+</sup> | #  | AA     | #  | y <sup>1+</sup> | y <sup>2+</sup> |
|---------|-----------------|-----------------|----|--------|----|-----------------|-----------------|
|         | 100.0757        | 50.5415         | 1  | V      | 13 |                 |                 |
|         | 256.1768        | 128.5920        | 2  | R      | 12 | 1401.5923       | 701.2998        |
|         | 384.2354        | 192.6213        | 3  | Q      | 11 | 1245.4912       | 623.2492        |
|         | 481.2881        | 241.1477        | 4  | P      | 10 | 1117.4326       | 559.2200        |
|         | 552.3253        | 276.6663        | 5  | A      | 9  | 1020.3799       | 510.6936        |
|         | 719.3236        | 360.1654        | 6  | S[167] | 8  | 949.3428        | 475.1750        |
|         | 833.3665        | 417.1869        | 7  | N      | 7  | 782.3444        | 391.6758        |
|         | 920.3986        | 460.7029        | 8  | S      | 6  | 668.3015        | 334.6544        |
|         | 977.4200        | 489.2137        | 9  | G      | 5  | 581.2694        | 291.1384        |
|         | 1144.4184       | 572.7128        | 10 | S[167] | 4  | 524.2480        | 262.6276        |
|         | 1241.4712       | 621.2392        | 11 | P      | 3  | 357.2496        | 179.1284        |
|         | 1354.5552       | 677.7812        | 12 | I      | 2  | 260.1969        | 130.6021        |
|         |                 |                 | 13 | K      | 1  | 147.1128        | 74.0600         |

Annotated spectra from Saleem et. al. 2009

R.VRQPASNS<sub>167</sub>GS<sub>167</sub>PIKST<sub>181</sub>PR.R/3

0.9594

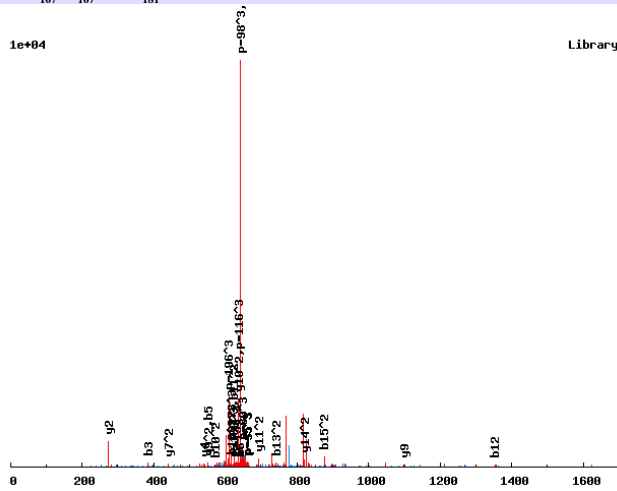

| Library | b <sup>1+</sup> | b <sup>2+</sup> | b <sup>3+</sup> | #  | AA     | #  | y <sup>1+</sup> | y <sup>2+</sup> | y <sup>3+</sup> |
|---------|-----------------|-----------------|-----------------|----|--------|----|-----------------|-----------------|-----------------|
|         | 100.0757        | 50.5415         | 34.0301         | 1  | V      | 17 |                 |                 |                 |
|         | 256.1768        | 128.5920        | 86.0638         | 2  | R      | 16 | 1922.7922       | 961.8998        | 641.6023        |
|         | 384.2354        | 192.6213        | 128.7500        | 3  | Q      | 15 | 1766.6911       | 883.8492        | 589.5686        |
|         | 481.2881        | 241.1477        | 161.1009        | 4  | P      | 14 | 1638.6325       | 819.8199        | 546.8824        |
|         | 552.3253        | 276.6663        | 184.7799        | 5  | A      | 13 | 1541.5798       | 771.2935        | 514.5314        |
|         | 639.3573        | 320.1823        | 213.7906        | 6  | S      | 12 | 1470.5427       | 735.7750        | 490.8524        |
|         | 753.4002        | 377.2037        | 251.8049        | 7  | N      | 11 | 1383.5106       | 692.2590        | 461.8417        |
|         | 920.3986        | 460.7029        | 307.4710        | 8  | S[167] | 10 | 1269.4677       | 635.2375        | 423.8274        |
|         | 977.4200        | 489.2137        | 326.4782        | 9  | G      | 9  | 1102.4694       | 551.7383        | 368.1613        |
|         | 1144.4184       | 572.7128        | 382.1443        | 10 | S[167] | 8  | 1045.4479       | 523.2276        | 349.1542        |
|         | 1241.4712       | 621.2392        | 414.4952        | 11 | P      | 7  | 878.4495        | 439.7284        | 293.4880        |
|         | 1354.5552       | 677.7812        | 452.1899        | 12 | I      | 6  | 781.3968        | 391.2020        | 261.1371        |
|         | 1482.6502       | 741.8287        | 494.8882        | 13 | K      | 5  | 668.3127        | 334.6600        | 223.4424        |
|         | 1569.6822       | 785.3447        | 523.8989        | 14 | S      | 4  | 540.2178        | 270.6125        | 180.7441        |
|         | 1750.6962       | 875.8517        | 584.2369        | 15 | T[181] | 3  | 453.1857        | 227.0965        | 151.7334        |
|         | 1847.7490       | 924.3781        | 616.5878        | 16 | P      | 2  | 272.1717        | 136.5895        | 91.3954         |
|         |                 |                 |                 | 17 | R      | 1  | 175.1190        | 88.0631         | 59.0445         |





# Annotated spectra from Saleem et. al. 2009

K.VSDDS<sub>167</sub>ES<sub>167</sub>ESGDK<sub>136</sub>EAT<sub>181</sub>APLIQR<sub>166</sub>K/3

0.9994

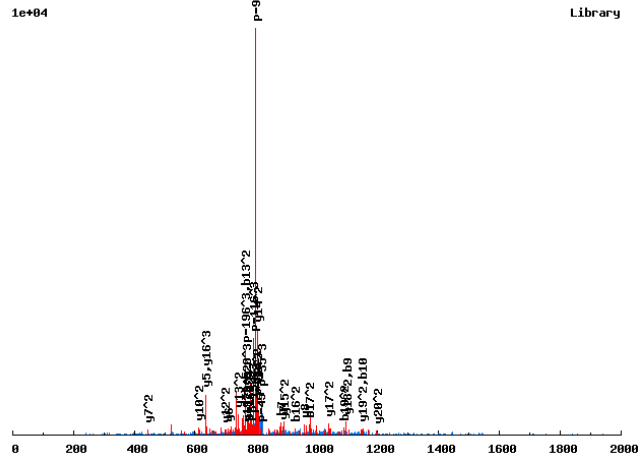

| Library | b <sup>1+</sup> | b <sup>2+</sup> | b <sup>3+</sup> | #  | AA     | #  | y <sup>1+</sup> | y <sup>2+</sup> | y <sup>3+</sup> |
|---------|-----------------|-----------------|-----------------|----|--------|----|-----------------|-----------------|-----------------|
|         | 100.0757        | 50.5415         | 34.0301         | 1  | V      | 21 |                 |                 |                 |
|         | 187.1077        | 94.0575         | 63.0408         | 2  | S      | 20 | 2392.8949       | 1196.9511       | 798.3032        |
|         | 302.1347        | 151.5710        | 101.3831        | 3  | D      | 19 | 2305.8629       | 1153.4351       | 769.2925        |
|         | 417.1616        | 209.0844        | 139.7254        | 4  | D      | 18 | 2190.8359       | 1095.9216       | 730.9502        |
|         | 584.1600        | 292.5836        | 195.3915        | 5  | S[167] | 17 | 2075.8090       | 1038.4081       | 692.6079        |
|         | 713.2026        | 357.1049        | 238.4057        | 6  | E      | 16 | 1908.8106       | 954.9090        | 636.9417        |
|         | 880.2009        | 440.6041        | 294.0718        | 7  | S[167] | 15 | 1779.7680       | 890.3877        | 593.9275        |
|         | 1009.2435       | 505.1254        | 337.0860        | 8  | E      | 14 | 1612.7697       | 806.8885        | 538.2614        |
|         | 1096.2755       | 548.6414        | 366.0967        | 9  | S      | 13 | 1483.7271       | 742.3672        | 495.2472        |
|         | 1153.2970       | 577.1521        | 385.1039        | 10 | G      | 12 | 1396.6951       | 698.8512        | 466.2365        |
|         | 1268.3239       | 634.6656        | 423.4462        | 11 | D      | 11 | 1339.6736       | 670.3404        | 447.2294        |
|         | 1404.4331       | 702.7202        | 468.8159        | 12 | K[136] | 10 | 1224.6467       | 612.8270        | 408.8871        |
|         | 1533.4757       | 767.2415        | 511.8301        | 13 | E      | 9  | 1088.5375       | 544.7724        | 363.5174        |
|         | 1604.5128       | 802.7600        | 535.5091        | 14 | A      | 8  | 959.4949        | 480.2511        | 320.5032        |
|         | 1785.5268       | 893.2670        | 595.8471        | 15 | T[181] | 7  | 888.4578        | 444.7325        | 296.8241        |
|         | 1856.5639       | 928.7856        | 619.5262        | 16 | A      | 6  | 707.4438        | 354.2255        | 236.4861        |
|         | 1953.6167       | 977.3120        | 651.8771        | 17 | P      | 5  | 636.4067        | 318.7070        | 212.8071        |
|         | 2066.7007       | 1033.8540       | 689.5718        | 18 | L      | 4  | 539.3539        | 270.1806        | 180.4562        |
|         | 2179.7848       | 1090.3960       | 727.2665        | 19 | I      | 3  | 426.2699        | 213.6386        | 142.7615        |
|         | 2307.8434       | 1154.4253       | 769.9526        | 20 | Q      | 2  | 313.1858        | 157.0965        | 105.0668        |
|         |                 |                 |                 | 21 | R[166] | 1  | 185.1272        | 93.0672         | 62.3806         |

# Annotated spectra from Saleem et. al. 2009

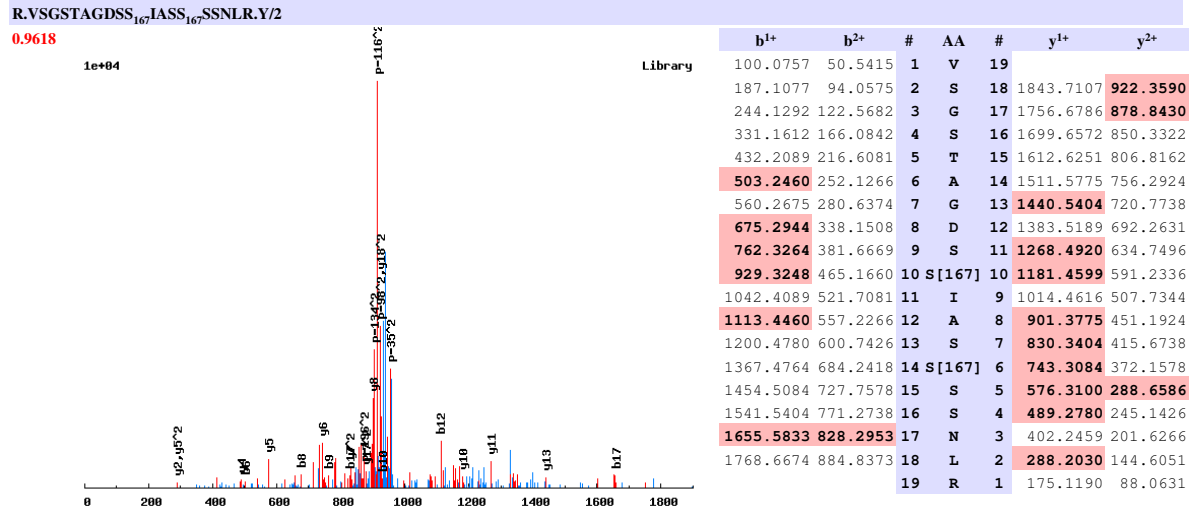

# Annotated spectra from Saleem et. al. 2009

K.VLSLS<sub>167</sub>PK<sub>136</sub>S<sub>167</sub>PQENDTVVDILGDAHSK<sub>136</sub>S/3

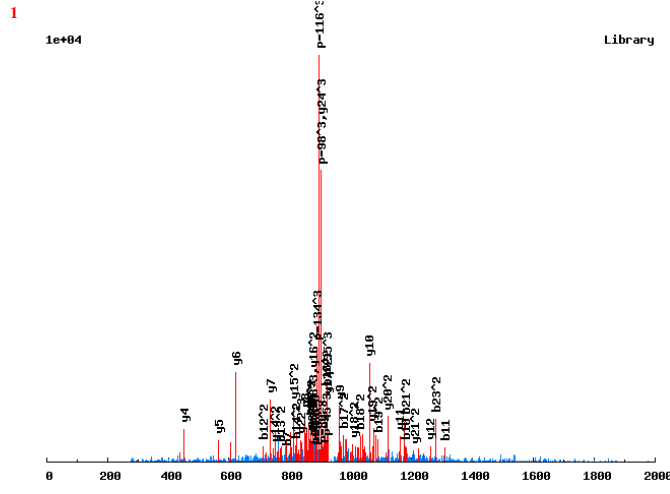

| Library | b <sup>1+</sup> | b <sup>2+</sup> | b <sup>3+</sup> | #  | AA     | #  | y <sup>1+</sup> | y <sup>2+</sup> | y <sup>3+</sup> |
|---------|-----------------|-----------------|-----------------|----|--------|----|-----------------|-----------------|-----------------|
|         | 100.0757        | 50.5415         | 34.0301         | 1  | V      | 25 |                 |                 |                 |
|         | 187.1077        | 94.0575         | 63.0408         | 2  | S      | 24 | 2700.2136       | 1350.6104       | 900.7427        |
|         | 300.1918        | 150.5995        | 100.7354        | 3  | L      | 23 | 2613.1815       | 1307.0944       | 871.7320        |
|         | 387.2238        | 194.1155        | 129.7461        | 4  | S      | 22 | 2500.0975       | 1250.5524       | 834.0373        |
|         | 554.2222        | 277.6147        | 185.4122        | 5  | S[167] | 21 | 2413.0654       | 1207.0364       | 805.0267        |
|         | 651.2749        | 326.1411        | 217.7632        | 6  | P      | 20 | 2246.0671       | 1123.5372       | 749.3605        |
|         | 787.3841        | 394.1957        | 263.1329        | 7  | K[136] | 19 | 2149.0143       | 1075.0108       | 717.0096        |
|         | 954.3825        | 477.6949        | 318.7990        | 8  | S[167] | 18 | 2012.9052       | 1006.9562       | 671.6399        |
|         | 1051.4352       | 526.2212        | 351.1499        | 9  | P      | 17 | 1845.9068       | 923.4570        | 615.9738        |
|         | 1179.4938       | 590.2505        | 393.8361        | 10 | Q      | 16 | 1748.8540       | 874.9307        | 583.6229        |
|         | 1308.5364       | 654.7718        | 436.8503        | 11 | E      | 15 | 1620.7955       | 810.9014        | 540.9367        |
|         | 1422.5793       | 711.7933        | 474.8646        | 12 | N      | 14 | 1491.7529       | 746.3801        | 497.9225        |
|         | 1537.6063       | 769.3068        | 513.2069        | 13 | D      | 13 | 1377.7099       | 689.3586        | 459.9082        |
|         | 1638.6539       | 819.8306        | 546.8895        | 14 | T      | 12 | 1262.6830       | 631.8451        | 421.5659        |
|         | 1737.7223       | 869.3648        | 579.9123        | 15 | V      | 11 | 1161.6353       | 581.3213        | 387.8833        |
|         | 1836.7908       | 918.8990        | 612.9351        | 16 | V      | 10 | 1062.5669       | 531.7871        | 354.8605        |
|         | 1951.8177       | 976.4125        | 651.2774        | 17 | D      | 9  | 963.4985        | 482.2529        | 321.8377        |
|         | 2064.9018       | 1032.9545       | 688.9721        | 18 | I      | 8  | 848.4716        | 424.7394        | 283.4954        |
|         | 2177.9858       | 1089.4965       | 726.6668        | 19 | L      | 7  | 735.3875        | 368.1974        | 245.8007        |
|         | 2235.0073       | 1118.0073       | 745.6739        | 20 | G      | 6  | 622.3034        | 311.6554        | 208.1060        |
|         | 2350.0342       | 1175.5207       | 784.0163        | 21 | D      | 5  | 565.2820        | 283.1446        | 189.0988        |
|         | 2421.0713       | 1211.0393       | 807.6953        | 22 | A      | 4  | 450.2550        | 225.6312        | 150.7565        |
|         | 2558.1302       | 1279.5688       | 853.3816        | 23 | H      | 3  | 379.2179        | 190.1126        | 127.0775        |
|         | 2645.1623       | 1323.0848       | 882.3923        | 24 | S      | 2  | 242.1590        | 121.5832        | 81.3912         |
|         |                 |                 |                 | 25 | K[136] | 1  | 155.1270        | 78.0671         | 52.3805         |



# Annotated spectra from Saleem et. al. 2009

R.VSS<sub>167</sub>NR<sub>166</sub>S<sub>167</sub>STPTSPIDLIDPIK<sub>136</sub>T/3

0.892

1e+04

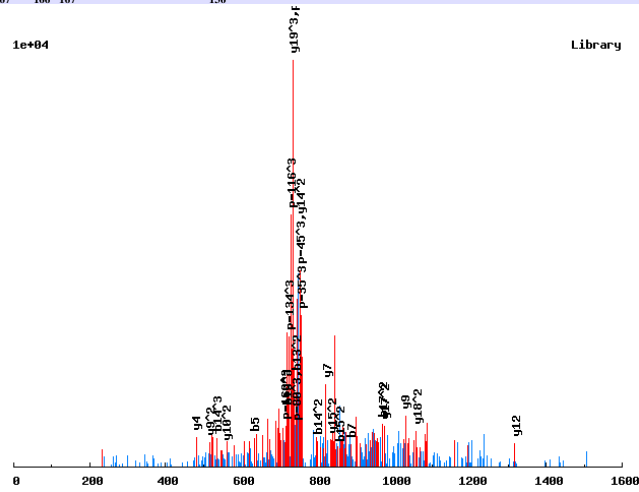

| Library | b <sup>1+</sup> | b <sup>2+</sup> | b <sup>3+</sup> | #  | AA     | #  | y <sup>1+</sup> | y <sup>2+</sup> | y <sup>3+</sup> |
|---------|-----------------|-----------------|-----------------|----|--------|----|-----------------|-----------------|-----------------|
|         | 100.0757        | 50.5415         | 34.0301         | 1  | V      | 20 |                 |                 |                 |
|         | 187.1077        | 94.0575         | 63.0408         | 2  | S      | 19 | 2206.0159       | 1103.5116       | 736.0101        |
|         | 354.1061        | 177.5567        | 118.7069        | 3  | S[167] | 18 | 2118.9838       | 1059.9956       | 706.9995        |
|         | 468.1490        | 234.5781        | 156.7212        | 4  | N      | 17 | 1951.9855       | 976.4964        | 651.3333        |
|         | 634.2584        | 317.6328        | 212.0910        | 5  | R[166] | 16 | 1837.9426       | 919.4749        | 613.3190        |
|         | 801.2568        | 401.1320        | 267.7571        | 6  | S[167] | 15 | 1671.8332       | 836.4202        | 557.9492        |
|         | 888.2888        | 444.6480        | 296.7678        | 7  | S      | 14 | 1504.8348       | 752.9210        | 502.2831        |
|         | 989.3365        | 495.1719        | 330.4503        | 8  | T      | 13 | 1417.8028       | 709.4050        | 473.2724        |
|         | 1086.3892       | 543.6983        | 362.8013        | 9  | P      | 12 | 1316.7551       | 658.8812        | 439.5899        |
|         | 1187.4369       | 594.2221        | 396.4838        | 10 | T      | 11 | 1219.7023       | 610.3548        | 407.2390        |
|         | 1274.4689       | 637.7381        | 425.4945        | 11 | S      | 10 | 1118.6547       | 559.8310        | 373.5564        |
|         | 1371.5217       | 686.2645        | 457.8454        | 12 | P      | 9  | 1031.6226       | 516.3150        | 344.5457        |
|         | 1484.6058       | 742.8065        | 495.5401        | 13 | I      | 8  | 934.5699        | 467.7886        | 312.1948        |
|         | 1599.6327       | 800.3200        | 533.8824        | 14 | D      | 7  | 821.4858        | 411.2465        | 274.5001        |
|         | 1712.7168       | 856.8620        | 571.5771        | 15 | L      | 6  | 706.4589        | 353.7331        | 236.1578        |
|         | 1825.8008       | 913.4040        | 609.2718        | 16 | I      | 5  | 593.3748        | 297.1910        | 198.4631        |
|         | 1940.8278       | 970.9175        | 647.6141        | 17 | D      | 4  | 480.2908        | 240.6490        | 160.7684        |
|         | 2037.8805       | 1019.4439       | 679.9650        | 18 | P      | 3  | 365.2638        | 183.1355        | 122.4261        |
|         | 2150.9646       | 1075.9859       | 717.6597        | 19 | I      | 2  | 268.2111        | 134.6092        | 90.0752         |
|         |                 |                 |                 | 20 | K[136] | 1  | 155.1270        | 78.0671         | 52.3805         |

# Annotated spectra from Saleem et. al. 2009

R.VS<sub>167</sub>S<sub>167</sub>T<sub>181</sub>AS<sub>167</sub>AS<sub>167</sub>SATS<sub>167</sub>R.L/3

0.9406

1e+04

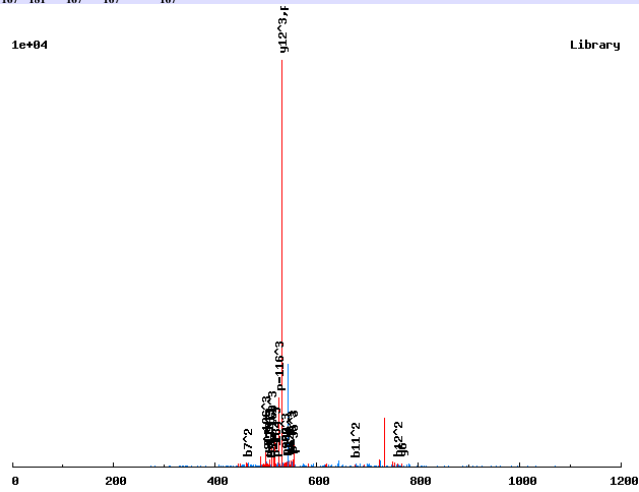

| Library | b <sup>1+</sup> | b <sup>2+</sup> | b <sup>3+</sup> | #  | AA     | #  | y <sup>1+</sup> | y <sup>2+</sup> | y <sup>3+</sup> |
|---------|-----------------|-----------------|-----------------|----|--------|----|-----------------|-----------------|-----------------|
|         | 100.0757        | 50.5415         | 34.0301         | 1  | V      | 13 |                 |                 |                 |
|         | 267.0741        | 134.0407        | 89.6962         | 2  | S[167] | 12 | 1592.3158       | 796.6615        | 531.4435        |
|         | 434.0724        | 217.5398        | 145.3623        | 3  | S[167] | 11 | 1425.3174       | 713.1624        | 475.7773        |
|         | 615.0864        | 308.0469        | 205.7003        | 4  | T[181] | 10 | 1258.3191       | 629.6632        | 420.1112        |
|         | 686.1235        | 343.5654        | 229.3794        | 5  | A      | 9  | 1077.3051       | 539.1562        | 359.7732        |
|         | 853.1219        | 427.0646        | 285.0455        | 6  | S[167] | 8  | 1006.2680       | 503.6376        | 336.0942        |
|         | 924.1590        | 462.5831        | 308.7245        | 7  | A      | 7  | 839.2696        | 420.1384        | 280.4281        |
|         | 1091.1574       | 546.0823        | 364.3906        | 8  | S[167] | 6  | 768.2325        | 384.6199        | 256.7490        |
|         | 1178.1894       | 589.5983        | 393.4013        | 9  | S      | 5  | 601.2341        | 301.1207        | 201.0829        |
|         | 1249.2265       | 625.1169        | 417.0804        | 10 | A      | 4  | 514.2021        | 257.6047        | 172.0722        |
|         | 1350.2742       | 675.6407        | 450.7629        | 11 | T      | 3  | 443.1650        | 222.0861        | 148.3932        |
|         | 1517.2725       | 759.1399        | 506.4290        | 12 | S[167] | 2  | 342.1173        | 171.5623        | 114.7106        |
|         |                 |                 |                 | 13 | R      | 1  | 175.1190        | 88.0631         | 59.0445         |

# Annotated spectra from Saleem et. al. 2009

R.VSS<sub>167</sub>T<sub>181</sub>ASMHTLR.S/2

0.7287

1e+04

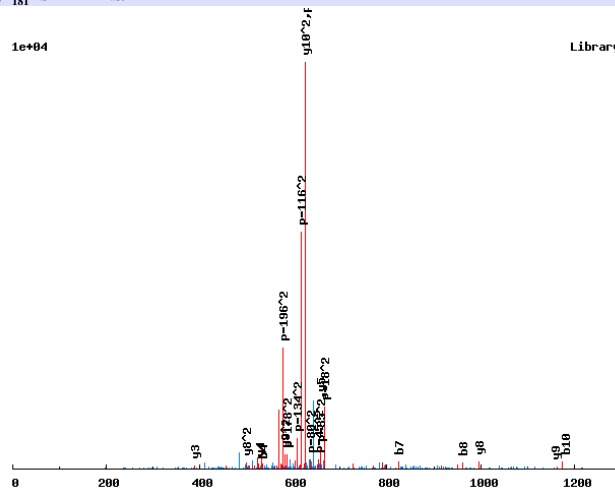

| Library | b <sup>1+</sup> | b <sup>2+</sup> | #  | AA     | #  | y <sup>1+</sup> | y <sup>2+</sup> |
|---------|-----------------|-----------------|----|--------|----|-----------------|-----------------|
|         | 100.0757        | 50.5415         | 1  | V      | 11 |                 |                 |
|         | 187.1077        | 94.0575         | 2  | S      | 10 | 1250.4636       | 625.7355        |
|         | 354.1061        | 177.5567        | 3  | S[167] | 9  | 1163.4316       | 582.2194        |
|         | 535.1201        | 268.0637        | 4  | T[181] | 8  | 996.4332        | 498.7203        |
|         | 606.1572        | 303.5822        | 5  | A      | 7  | 815.4192        | 408.2133        |
|         | 693.1892        | 347.0983        | 6  | S      | 6  | 744.3821        | 372.6947        |
|         | 824.2297        | 412.6185        | 7  | M      | 5  | 657.3501        | 329.1787        |
|         | 961.2886        | 481.1480        | 8  | H      | 4  | 526.3096        | 263.6584        |
|         | 1062.3363       | 531.6718        | 9  | T      | 3  | 389.2507        | 195.1290        |
|         | 1175.4204       | 588.2138        | 10 | L      | 2  | 288.2030        | 144.6051        |
|         |                 |                 | 11 | R      | 1  | 175.1190        | 88.0631         |

# Annotated spectra from Saleem et. al. 2009

R.VSSTY<sub>243</sub>S<sub>167</sub>SPGALEFSR<sub>166</sub>I/2

0.9681

1e+04

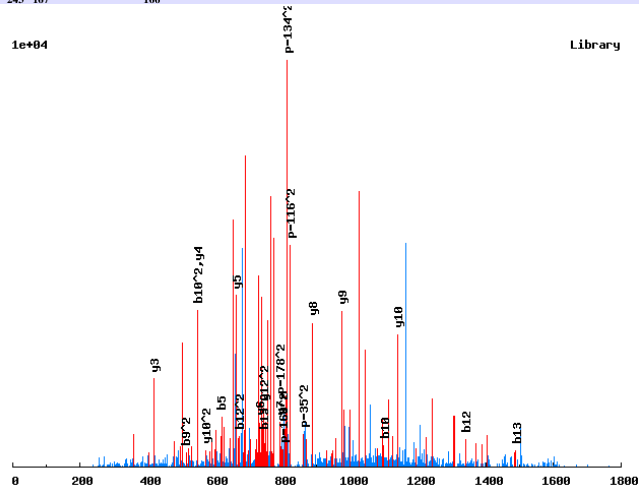

| Library | b <sup>1+</sup> | b <sup>2+</sup> | #  | AA     | #  | y <sup>1+</sup> | y <sup>2+</sup> |
|---------|-----------------|-----------------|----|--------|----|-----------------|-----------------|
|         | 100.0757        | 50.5415         | 1  | V      | 15 |                 |                 |
|         | 187.1077        | 94.0575         | 2  | S      | 14 | 1658.6374       | 829.8224        |
|         | 274.1397        | 137.5735        | 3  | S      | 13 | 1571.6054       | 786.3063        |
|         | 375.1874        | 188.0974        | 4  | T      | 12 | 1484.5734       | 742.7903        |
|         | 618.2171        | 309.6122        | 5  | Y[243] | 11 | 1383.5257       | 692.2665        |
|         | 785.2155        | 393.1114        | 6  | S[167] | 10 | 1140.4960       | 570.7517        |
|         | 872.2475        | 436.6274        | 7  | S      | 9  | 973.4977        | 487.2525        |
|         | 969.3002        | 485.1538        | 8  | P      | 8  | 886.4656        | 443.7365        |
|         | 1026.3217       | 513.6645        | 9  | G      | 7  | 789.4129        | 395.2101        |
|         | 1097.3588       | 549.1830        | 10 | A      | 6  | 732.3914        | 366.6993        |
|         | 1210.4429       | 605.7251        | 11 | L      | 5  | 661.3543        | 331.1808        |
|         | 1339.4855       | 670.2464        | 12 | E      | 4  | 548.2702        | 274.6388        |
|         | 1486.5539       | 743.7806        | 13 | F      | 3  | 419.2277        | 210.1175        |
|         | 1573.5859       | 787.2966        | 14 | S      | 2  | 272.1592        | 136.5833        |
|         |                 |                 | 15 | R[166] | 1  | 185.1272        | 93.0672         |



# Annotated spectra from Saleem et. al. 2009

K.VSVG<sub>167</sub>MGS<sub>GK.S/2</sub>

0.9909

1e+04

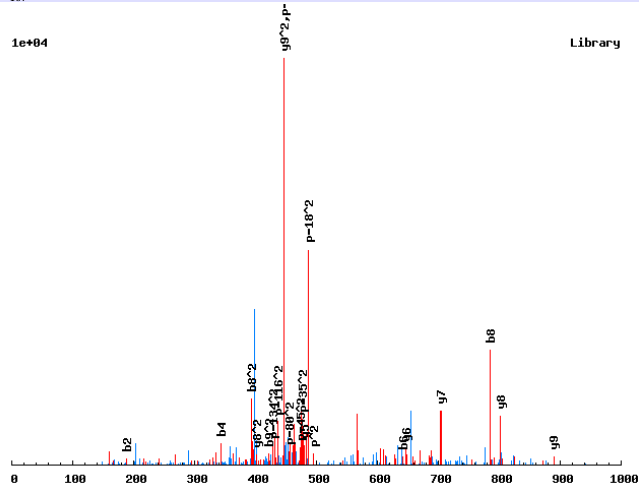

| Library | b <sup>1+</sup> | b <sup>2+</sup> | #  | AA     | #  | y <sup>1+</sup> | y <sup>2+</sup> |
|---------|-----------------|-----------------|----|--------|----|-----------------|-----------------|
|         | 100.0757        | 50.5415         | 1  | V      | 10 |                 |                 |
|         | 187.1077        | 94.0575         | 2  | S      | 9  | 889.3485        | 445.1779        |
|         | 286.1761        | 143.5917        | 3  | V      | 8  | 802.3165        | 401.6619        |
|         | 343.1976        | 172.1024        | 4  | G      | 7  | 703.2481        | 352.1277        |
|         | 510.1960        | 255.6016        | 5  | S[167] | 6  | 646.2266        | 323.6169        |
|         | 641.2364        | 321.1219        | 6  | M      | 5  | 479.2282        | 240.1178        |
|         | 698.2579        | 349.6326        | 7  | G      | 4  | 348.1877        | 174.5975        |
|         | 785.2899        | 393.1486        | 8  | S      | 3  | 291.1663        | 146.0868        |
|         | 842.3114        | 421.6593        | 9  | G      | 2  | 204.1343        | 102.5708        |
|         |                 |                 | 10 | K      | 1  | 147.1128        | 74.0600         |

# Annotated spectra from Saleem et. al. 2009

R.VTF<sub>181</sub>INS<sub>167</sub>TSANNTPR<sub>166</sub>R/2

0.8431

1e+04

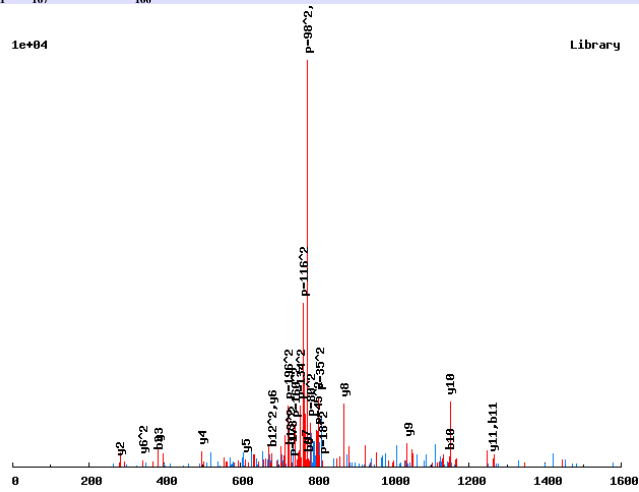

| Library | b <sup>1+</sup> | b <sup>2+</sup> | #  | AA     | #  | y <sup>1+</sup> | y <sup>2+</sup> |
|---------|-----------------|-----------------|----|--------|----|-----------------|-----------------|
|         | 100.0757        | 50.5415         | 1  | V      | 14 |                 |                 |
|         | 201.1234        | 101.0653        | 2  | T      | 13 | 1546.6174       | 773.8123        |
|         | 382.1374        | 191.5723        | 3  | T[181] | 12 | 1445.5697       | 723.2885        |
|         | 495.2214        | 248.1144        | 4  | I      | 11 | 1264.5557       | 632.7815        |
|         | 609.2644        | 305.1358        | 5  | N      | 10 | 1151.4716       | 576.2395        |
|         | 776.2627        | 388.6350        | 6  | S[167] | 9  | 1037.4287       | 519.2180        |
|         | 877.3104        | 439.1588        | 7  | T      | 8  | 870.4303        | 435.7188        |
|         | 964.3424        | 482.6749        | 8  | S      | 7  | 769.3827        | 385.1950        |
|         | 1035.3796       | 518.1934        | 9  | A      | 6  | 682.3506        | 341.6790        |
|         | 1149.4225       | 575.2149        | 10 | N      | 5  | 611.3135        | 306.1604        |
|         | 1263.4654       | 632.2363        | 11 | N      | 4  | 497.2706        | 249.1389        |
|         | 1364.5131       | 682.7602        | 12 | T      | 3  | 383.2277        | 192.1175        |
|         | 1461.5659       | 731.2866        | 13 | P      | 2  | 282.1800        | 141.5936        |
|         |                 |                 | 14 | R[166] | 1  | 185.1272        | 93.0672         |

# Annotated spectra from Saleem et. al. 2009

M.VTT<sub>181</sub>PLHSS<sub>167</sub>PK.S/2

0.705

1e+04

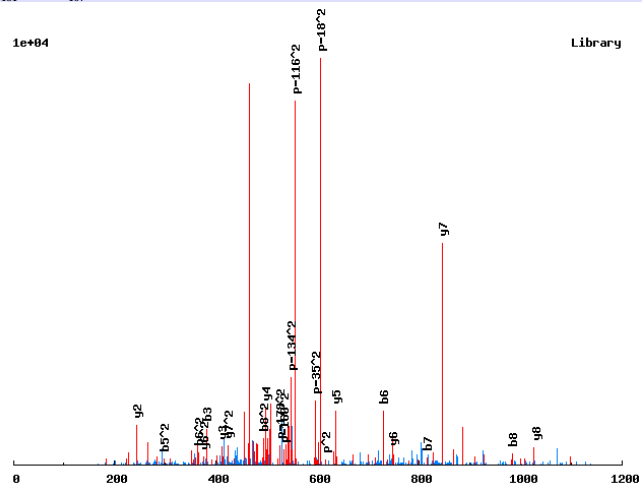

| Library | b <sup>1+</sup> | b <sup>2+</sup> | #  | AA     | #  | y <sup>1+</sup> | y <sup>2+</sup> |
|---------|-----------------|-----------------|----|--------|----|-----------------|-----------------|
|         | 100.0757        | 50.5415         | 1  | V      | 10 |                 |                 |
|         | 201.1234        | 101.0653        | 2  | T      | 9  | 1127.4534       | 564.2303        |
|         | <b>382.1374</b> | 191.5723        | 3  | T[181] | 8  | 1026.4057       | 513.7065        |
|         | 479.1901        | 240.0987        | 4  | P      | 7  | 845.3917        | 423.1995        |
|         | 592.2742        | 296.6407        | 5  | L      | 6  | 748.3389        | 374.6731        |
|         | 729.3331        | 365.1702        | 6  | H      | 5  | 635.2549        | 318.1311        |
|         | 816.3651        | 408.6862        | 7  | S      | 4  | 498.1960        | 249.6016        |
|         | 983.3635        | 492.1854        | 8  | S[167] | 3  | 411.1639        | 206.0856        |
|         | 1080.4163       | 540.7118        | 9  | P      | 2  | 244.1656        | 122.5864        |
|         |                 |                 | 10 | K      | 1  | 147.1128        | 74.0600         |

# Annotated spectra from Saleem et. al. 2009

K.VVEAT<sub>181</sub>PEDGTASSQK.S/2

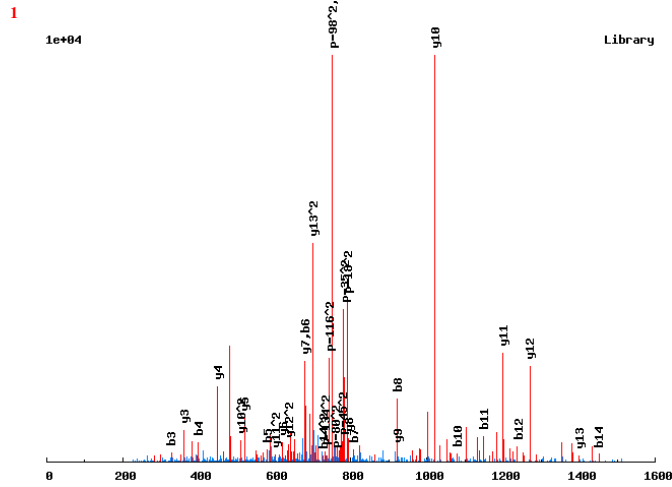

| Library | b <sup>1+</sup> | b <sup>2+</sup> | #  | AA     | #  | y <sup>1+</sup> | y <sup>2+</sup> |
|---------|-----------------|-----------------|----|--------|----|-----------------|-----------------|
|         | 100.0757        | 50.5415         | 1  | V      | 15 |                 |                 |
|         | 199.1441        | 100.0757        | 2  | V      | 14 | 1499.6261       | 750.3167        |
|         | 328.1867        | 164.5970        | 3  | E      | 13 | 1400.5577       | 700.7825        |
|         | 399.2238        | 200.1155        | 4  | A      | 12 | 1271.5151       | 636.2612        |
|         | 580.2378        | 290.6225        | 5  | T[181] | 11 | 1200.4780       | 600.7426        |
|         | 677.2906        | 339.1489        | 6  | P      | 10 | 1019.4640       | 510.2356        |
|         | 806.3332        | 403.6702        | 7  | E      | 9  | 922.4112        | 461.7093        |
|         | 921.3601        | 461.1837        | 8  | D      | 8  | 793.3686        | 397.1880        |
|         | 978.3816        | 489.6944        | 9  | G      | 7  | 678.3417        | 339.6745        |
|         | 1079.4292       | 540.2183        | 10 | T      | 6  | 621.3202        | 311.1638        |
|         | 1150.4664       | 575.7368        | 11 | A      | 5  | 520.2726        | 260.6399        |
|         | 1237.4984       | 619.2528        | 12 | S      | 4  | 449.2354        | 225.1214        |
|         | 1324.5304       | 662.7688        | 13 | S      | 3  | 362.2034        | 181.6053        |
|         | 1452.5890       | 726.7981        | 14 | Q      | 2  | 275.1714        | 138.0893        |
|         |                 |                 | 15 | K      | 1  | 147.1128        | 74.0600         |

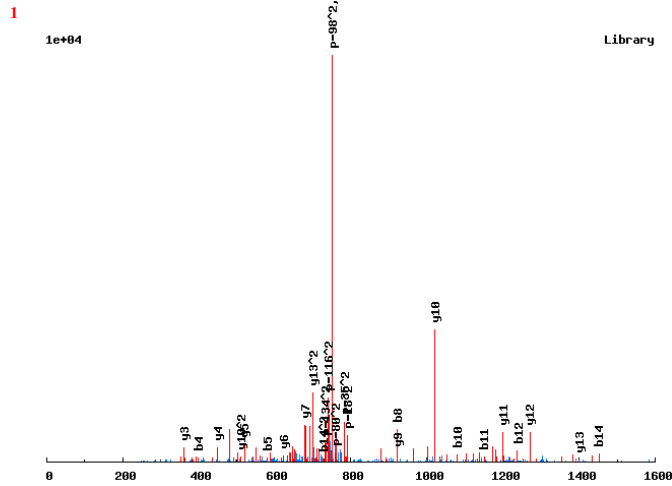

| Library | b <sup>1+</sup> | b <sup>2+</sup> | #  | AA     | #  | y <sup>1+</sup> | y <sup>2+</sup> |
|---------|-----------------|-----------------|----|--------|----|-----------------|-----------------|
|         | 100.0757        | 50.5415         | 1  | V      | 15 |                 |                 |
|         | 199.1441        | 100.0757        | 2  | V      | 14 | 1499.6261       | 750.3167        |
|         | 328.1867        | 164.5970        | 3  | E      | 13 | 1400.5577       | 700.7825        |
|         | 399.2238        | 200.1155        | 4  | A      | 12 | 1271.5151       | 636.2612        |
|         | 580.2378        | 290.6225        | 5  | T[181] | 11 | 1200.4780       | 600.7426        |
|         | 677.2906        | 339.1489        | 6  | P      | 10 | 1019.4640       | 510.2356        |
|         | 806.3332        | 403.6702        | 7  | E      | 9  | 922.4112        | 461.7093        |
|         | 921.3601        | 461.1837        | 8  | D      | 8  | 793.3686        | 397.1880        |
|         | 978.3816        | 489.6944        | 9  | G      | 7  | 678.3417        | 339.6745        |
|         | 1079.4292       | 540.2183        | 10 | T      | 6  | 621.3202        | 311.1638        |
|         | 1150.4664       | 575.7368        | 11 | A      | 5  | 520.2726        | 260.6399        |
|         | 1237.4984       | 619.2528        | 12 | S      | 4  | 449.2354        | 225.1214        |
|         | 1324.5304       | 662.7688        | 13 | S      | 3  | 362.2034        | 181.6053        |
|         | 1452.5890       | 726.7981        | 14 | Q      | 2  | 275.1714        | 138.0893        |
|         |                 |                 | 15 | K      | 1  | 147.1128        | 74.0600         |

# Annotated spectra from Saleem et. al. 2009

K.VVKVT<sub>181</sub>VENT<sub>181</sub>PIAK.V/2

0.9418

1e+04

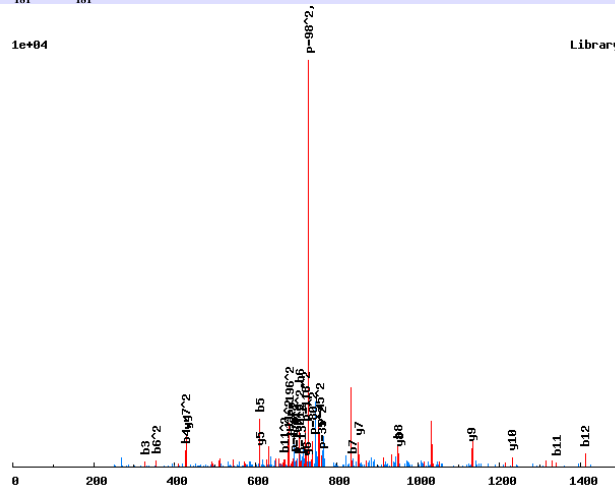

| Library | b <sup>1+</sup> | b <sup>2+</sup> | #  | AA     | #  | y <sup>1+</sup> | y <sup>2+</sup> |
|---------|-----------------|-----------------|----|--------|----|-----------------|-----------------|
|         | 100.0757        | 50.5415         | 1  | V      | 13 |                 |                 |
|         | 199.1441        | 100.0757        | 2  | V      | 12 | 1458.7005       | 729.8539        |
|         | 327.2391        | 164.1232        | 3  | K      | 11 | 1359.6321       | 680.3197        |
|         | 426.3075        | 213.6574        | 4  | V      | 10 | 1231.5371       | 616.2722        |
|         | 607.3215        | 304.1644        | 5  | T[181] | 9  | 1132.4687       | 566.7380        |
|         | 706.3899        | 353.6986        | 6  | V      | 8  | 951.4547        | 476.2310        |
|         | 835.4325        | 418.2199        | 7  | E      | 7  | 852.3863        | 426.6968        |
|         | 949.4754        | 475.2413        | 8  | N      | 6  | 723.3437        | 362.1755        |
|         | 1130.4894       | 565.7484        | 9  | T[181] | 5  | 609.3007        | 305.1540        |
|         | 1227.5422       | 614.2747        | 10 | P      | 4  | 428.2867        | 214.6470        |
|         | 1340.6262       | 670.8168        | 11 | I      | 3  | 331.2340        | 166.1206        |
|         | 1411.6634       | 706.3353        | 12 | A      | 2  | 218.1499        | 109.5786        |
|         |                 |                 | 13 | K      | 1  | 147.1128        | 74.0600         |

Annotated spectra from Saleem et. al. 2009

R.VYDHNDGDHES<sub>167</sub>ES<sub>167</sub>EDDENEENENQK<sub>136</sub>K/3

0.9998

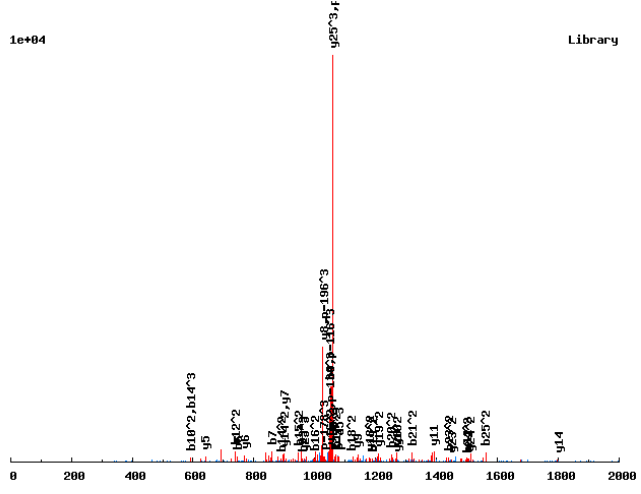

| Library | b <sup>1+</sup> | b <sup>2+</sup> | b <sup>3+</sup> | #  | AA     | #  | y <sup>1+</sup> | y <sup>2+</sup> | y <sup>3+</sup> |
|---------|-----------------|-----------------|-----------------|----|--------|----|-----------------|-----------------|-----------------|
|         | 100.0757        | 50.5415         | 34.0301         | 1  | V      | 26 |                 |                 |                 |
|         | 263.1390        | 132.0731        | 88.3845         | 2  | Y      | 25 | 3175.0321       | 1588.0197       | 1059.0155       |
|         | 378.1660        | 189.5866        | 126.7268        | 3  | D      | 24 | 3011.9687       | 1506.4880       | 1004.6611       |
|         | 515.2249        | 258.1161        | 172.4131        | 4  | H      | 23 | 2896.9418       | 1448.9745       | 966.3188        |
|         | 629.2678        | 315.1375        | 210.4275        | 5  | N      | 22 | 2759.8829       | 1380.4451       | 920.6325        |
|         | 744.2947        | 372.6510        | 248.7698        | 6  | D      | 21 | 2645.8399       | 1323.4236       | 882.6182        |
|         | 859.3217        | 430.1645        | 287.1121        | 7  | D      | 20 | 2530.8130       | 1265.9101       | 844.2759        |
|         | 916.3431        | 458.6752        | 306.1192        | 8  | G      | 19 | 2415.7861       | 1208.3967       | 805.9335        |
|         | 1053.4020       | 527.2047        | 351.8055        | 9  | H      | 18 | 2358.7646       | 1179.8859       | 786.9264        |
|         | 1182.4446       | 591.7260        | 394.8197        | 10 | E      | 17 | 2221.7057       | 1111.3565       | 741.2401        |
|         | 1349.4430       | 675.2251        | 450.4859        | 11 | S[167] | 16 | 2092.6631       | 1046.8352       | 698.2259        |
|         | 1478.4856       | 739.7464        | 493.5001        | 12 | E      | 15 | 1925.6647       | 963.3360        | 642.5598        |
|         | 1645.4840       | 823.2456        | 549.1662        | 13 | S[167] | 14 | 1796.6221       | 898.8147        | 599.5456        |
|         | 1774.5265       | 887.7669        | 592.1804        | 14 | E      | 13 | 1629.6238       | 815.3155        | 543.8794        |
|         | 1889.5535       | 945.2804        | 630.5227        | 15 | D      | 12 | 1500.5812       | 750.7942        | 500.8653        |
|         | 2004.5804       | 1002.7939       | 668.8650        | 16 | D      | 11 | 1385.5543       | 693.2808        | 462.5229        |
|         | 2133.6230       | 1067.3151       | 711.8792        | 17 | E      | 10 | 1270.5273       | 635.7673        | 424.1806        |
|         | 2247.6659       | 1124.3366       | 749.8935        | 18 | N      | 9  | 1141.4847       | 571.2460        | 381.1664        |
|         | 2376.7085       | 1188.8579       | 792.9077        | 19 | E      | 8  | 1027.4418       | 514.2245        | 343.1521        |
|         | 2505.7511       | 1253.3792       | 835.9219        | 20 | E      | 7  | 898.3992        | 449.7032        | 300.1379        |
|         | 2634.7937       | 1317.9005       | 878.9361        | 21 | E      | 6  | 769.3566        | 385.1819        | 257.1237        |
|         | 2748.8366       | 1374.9220       | 916.9504        | 22 | N      | 5  | 640.3140        | 320.6607        | 214.1095        |
|         | 2877.8792       | 1439.4433       | 959.9646        | 23 | E      | 4  | 526.2711        | 263.6392        | 176.0952        |
|         | 2991.9222       | 1496.4647       | 997.9789        | 24 | N      | 3  | 397.2285        | 199.1179        | 133.0810        |
|         | 3119.9807       | 1560.4940       | 1040.6651       | 25 | Q      | 2  | 283.1856        | 142.0964        | 95.0667         |
|         |                 |                 |                 | 26 | K[136] | 1  | 155.1270        | 78.0671         | 52.3805         |

# Annotated spectra from Saleem et. al. 2009

K.WADRPNLDDYD<sub>167</sub>DEDSR.T/3

0.8402

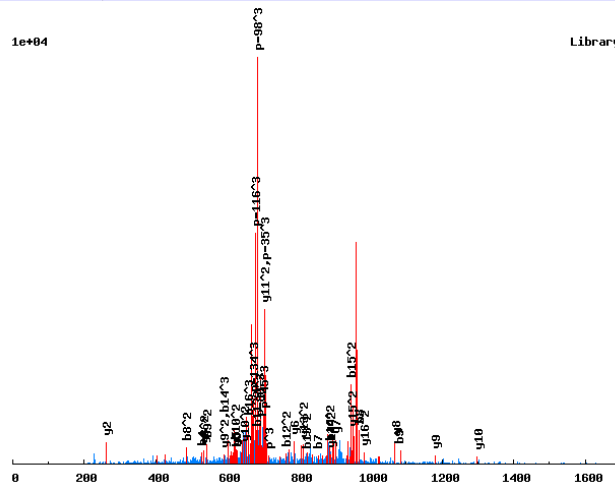

| Library | b <sup>1+</sup> | b <sup>2+</sup> | b <sup>3+</sup> | #  | AA     | #  | y <sup>1+</sup> | y <sup>2+</sup> | y <sup>3+</sup> |
|---------|-----------------|-----------------|-----------------|----|--------|----|-----------------|-----------------|-----------------|
|         | 187.0866        | 94.0469         | 63.0337         | 1  | W      | 17 |                 |                 |                 |
|         | 258.1237        | 129.5655        | 86.7128         | 2  | A      | 16 | 1962.7349       | 981.8711        | 654.9165        |
|         | 373.1506        | 187.0790        | 125.0551        | 3  | D      | 15 | 1891.6978       | 946.3525        | 631.2374        |
|         | 529.2518        | 265.1295        | 177.0888        | 4  | R      | 14 | 1776.6708       | 888.8391        | 592.8951        |
|         | 626.3045        | 313.6559        | 209.4397        | 5  | P      | 13 | 1620.5697       | 810.7885        | 540.8614        |
|         | 740.3474        | 370.6774        | 247.4540        | 6  | N      | 12 | 1523.5170       | 762.2621        | 508.5105        |
|         | 853.4315        | 427.2194        | 285.1487        | 7  | L      | 11 | 1409.4740       | 705.2407        | 470.4962        |
|         | 968.4584        | 484.7329        | 323.4910        | 8  | D      | 10 | 1296.3900       | 648.6986        | 432.8015        |
|         | 1083.4854       | 542.2463        | 361.8333        | 9  | D      | 9  | 1181.3630       | 591.1852        | 394.4592        |
|         | 1246.5487       | 623.7780        | 416.1878        | 10 | Y      | 8  | 1066.3361       | 533.6717        | 356.1169        |
|         | 1361.5756       | 681.2915        | 454.5301        | 11 | D      | 7  | 903.2728        | 452.1400        | 301.7624        |
|         | 1528.5740       | 764.7906        | 510.1962        | 12 | S[167] | 6  | 788.2458        | 394.6265        | 263.4201        |
|         | 1643.6010       | 822.3041        | 548.5385        | 13 | D      | 5  | 621.2475        | 311.1274        | 207.7540        |
|         | 1772.6435       | 886.8254        | 591.5527        | 14 | E      | 4  | 506.2205        | 253.6139        | 169.4117        |
|         | 1887.6705       | 944.3389        | 629.8950        | 15 | D      | 3  | 377.1779        | 189.0926        | 126.3975        |
|         | 1974.7025       | 987.8549        | 658.9057        | 16 | S      | 2  | 262.1510        | 131.5791        | 88.0552         |
|         |                 |                 |                 | 17 | R      | 1  | 175.1190        | 88.0631         | 59.0445         |

Annotated spectra from Saleem et. al. 2009

K.WNTANAANNAGS<sub>167</sub>VS<sub>167</sub>PTK.A/2

0.9815

1e+04

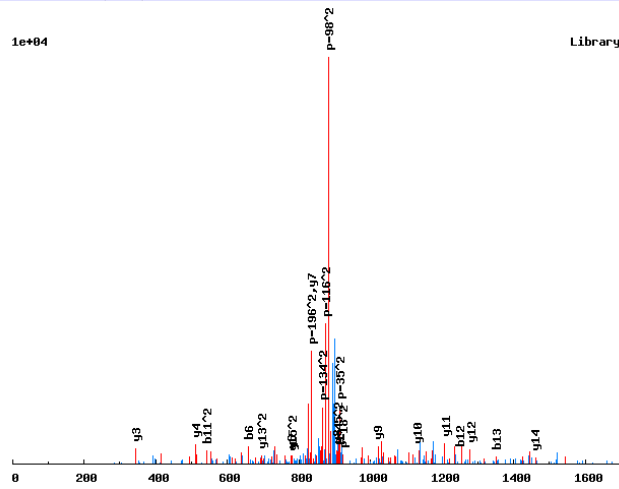

| Library | b <sup>1+</sup> | b <sup>2+</sup> | #  | AA     | #  | y <sup>1+</sup> | y <sup>2+</sup> |
|---------|-----------------|-----------------|----|--------|----|-----------------|-----------------|
|         | 187.0866        | 94.0469         | 1  | W      | 17 |                 |                 |
|         | 301.1295        | 151.0684        | 2  | N      | 16 | 1676.6677       | 838.8375        |
|         | 402.1772        | 201.5922        | 3  | T      | 15 | 1562.6247       | 781.8160        |
|         | 473.2143        | 237.1108        | 4  | A      | 14 | 1461.5771       | 731.2922        |
|         | 587.2572        | 294.1323        | 5  | N      | 13 | 1390.5400       | 695.7736        |
|         | 658.2944        | 329.6508        | 6  | A      | 12 | 1276.4970       | 638.7522        |
|         | 729.3315        | 365.1694        | 7  | A      | 11 | 1205.4599       | 603.2336        |
|         | 843.3744        | 422.1908        | 8  | N      | 10 | 1134.4228       | 567.7150        |
|         | 957.4173        | 479.2123        | 9  | N      | 9  | 1020.3799       | 510.6936        |
|         | 1028.4544       | 514.7309        | 10 | A      | 8  | 906.3369        | 453.6721        |
|         | 1085.4759       | 543.2416        | 11 | G      | 7  | 835.2998        | 418.1536        |
|         | 1252.4743       | 626.7408        | 12 | S[167] | 6  | 778.2784        | 389.6428        |
|         | 1351.5427       | 676.2750        | 13 | V      | 5  | 611.2800        | 306.1436        |
|         | 1518.5410       | 759.7742        | 14 | S[167] | 4  | 512.2116        | 256.6094        |
|         | 1615.5938       | 808.3005        | 15 | P      | 3  | 345.2132        | 173.1103        |
|         | 1716.6415       | 858.8244        | 16 | T      | 2  | 248.1605        | 124.5839        |
|         |                 |                 | 17 | K      | 1  | 147.1128        | 74.0600         |



# Annotated spectra from Saleem et. al. 2009

K.WYPS<sub>167</sub>EDVAALKK.T/2

0.8637

1e+04

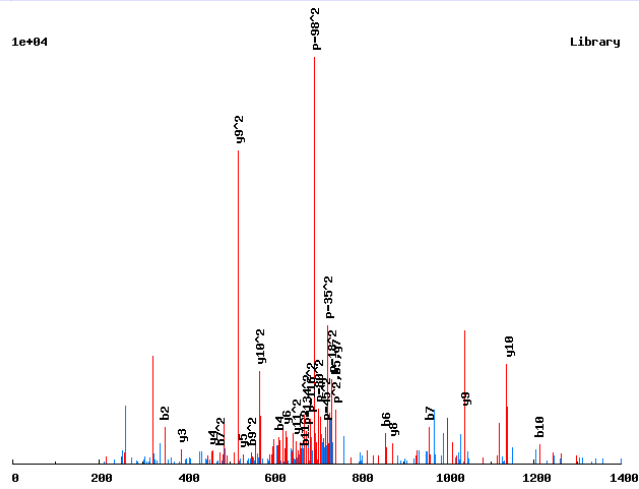

| Library | b <sup>1+</sup> | b <sup>2+</sup> | #  | AA     | #  | y <sup>1+</sup> | y <sup>2+</sup> |
|---------|-----------------|-----------------|----|--------|----|-----------------|-----------------|
|         | 187.0866        | 94.0469         | 1  | W      | 12 |                 |                 |
|         | 350.1499        | 175.5786        | 2  | Y      | 11 | 1300.6184       | 650.8129        |
|         | 447.2027        | 224.1050        | 3  | P      | 10 | 1137.5551       | 569.2812        |
|         | 614.2010        | 307.6042        | 4  | S[167] | 9  | 1040.5023       | 520.7548        |
|         | 743.2436        | 372.1255        | 5  | E      | 8  | 873.5040        | 437.2556        |
|         | 858.2706        | 429.6389        | 6  | D      | 7  | 744.4614        | 372.7343        |
|         | 957.3390        | 479.1731        | 7  | V      | 6  | 629.4345        | 315.2209        |
|         | 1028.3761       | 514.6917        | 8  | A      | 5  | 530.3660        | 265.6867        |
|         | 1099.4132       | 550.2102        | 9  | A      | 4  | 459.3289        | 230.1681        |
|         | 1212.4973       | 606.7523        | 10 | L      | 3  | 388.2918        | 194.6495        |
|         | 1340.5922       | 670.7998        | 11 | K      | 2  | 275.2078        | 138.1075        |
|         |                 |                 | 12 | K      | 1  | 147.1128        | 74.0600         |



# Annotated spectra from Saleem et. al. 2009

K.Y<sub>243</sub>DSPVSS<sub>167</sub>PITSASELGSIAK<sub>136</sub>L/2

0.9998

1e+04

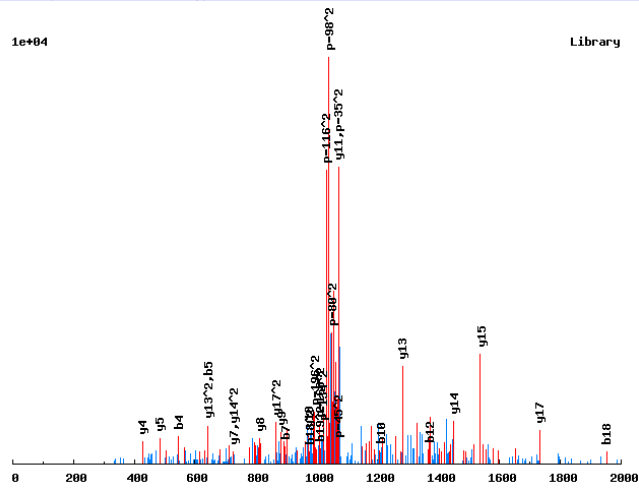

| Library | b <sup>1+</sup> | b <sup>2+</sup> | #  | AA      | #  | y <sup>1+</sup> | y <sup>2+</sup> |
|---------|-----------------|-----------------|----|---------|----|-----------------|-----------------|
|         | 244.0369        | 122.5221        | 1  | Y [243] | 20 |                 |                 |
|         | 359.0639        | 180.0356        | 2  | D       | 19 | 1933.9245       | 967.4659        |
|         | 446.0959        | 223.5516        | 3  | S       | 18 | 1818.8976       | 909.9524        |
|         | 543.1487        | 272.0780        | 4  | P       | 17 | 1731.8655       | 866.4364        |
|         | 642.2171        | 321.6122        | 5  | V       | 16 | 1634.8128       | 817.9100        |
|         | 729.2491        | 365.1282        | 6  | S       | 15 | 1535.7444       | 768.3758        |
|         | 896.2475        | 448.6274        | 7  | S [167] | 14 | 1448.7123       | 724.8598        |
|         | 993.3002        | 497.1538        | 8  | P       | 13 | 1281.7140       | 641.3606        |
|         | 1106.3843       | 553.6958        | 9  | I       | 12 | 1184.6612       | 592.8342        |
|         | 1207.4320       | 604.2196        | 10 | T       | 11 | 1071.5772       | 536.2922        |
|         | 1294.4640       | 647.7356        | 11 | S       | 10 | 970.5295        | 485.7684        |
|         | 1365.5011       | 683.2542        | 12 | A       | 9  | 883.4974        | 442.2524        |
|         | 1452.5331       | 726.7702        | 13 | S       | 8  | 812.4603        | 406.7338        |
|         | 1581.5757       | 791.2915        | 14 | E       | 7  | 725.4283        | 363.2178        |
|         | 1694.6598       | 847.8335        | 15 | L       | 6  | 596.3857        | 298.6965        |
|         | 1751.6813       | 876.3443        | 16 | G       | 5  | 483.3017        | 242.1545        |
|         | 1838.7133       | 919.8603        | 17 | S       | 4  | 426.2802        | 213.6437        |
|         | 1951.7973       | 976.4023        | 18 | I       | 3  | 339.2482        | 170.1277        |
|         | 2022.8345       | 1011.9209       | 19 | A       | 2  | 226.1641        | 113.5857        |
|         |                 |                 | 20 | K [136] | 1  | 155.1270        | 78.0671         |

# Annotated spectra from Saleem et. al. 2009

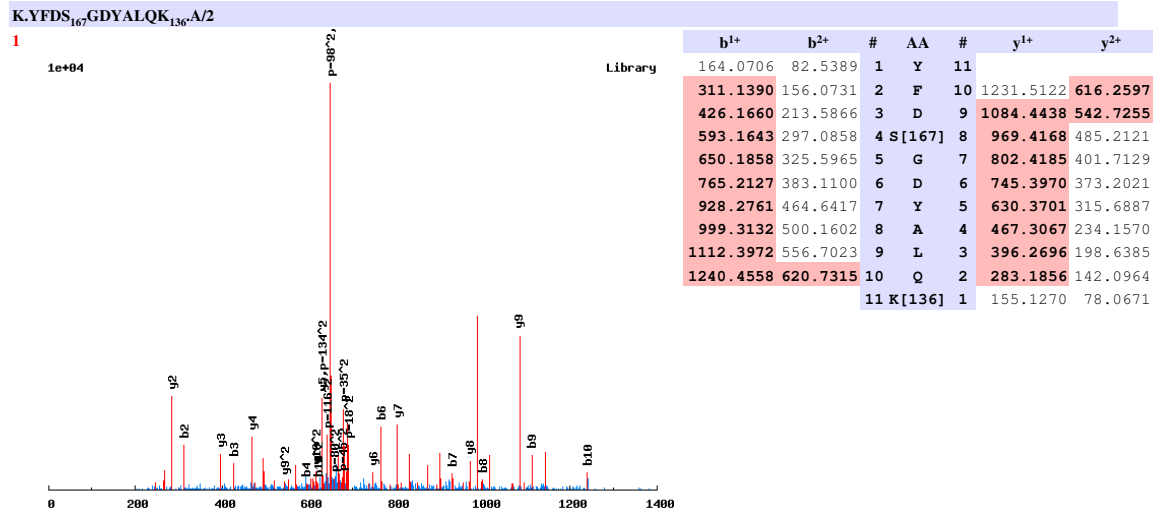

# Annotated spectra from Saleem et. al. 2009

R.Y<sub>243</sub>FDS<sub>167</sub>VR<sub>166</sub>STPVAEK<sub>136</sub>M/2

0.755

1e+04

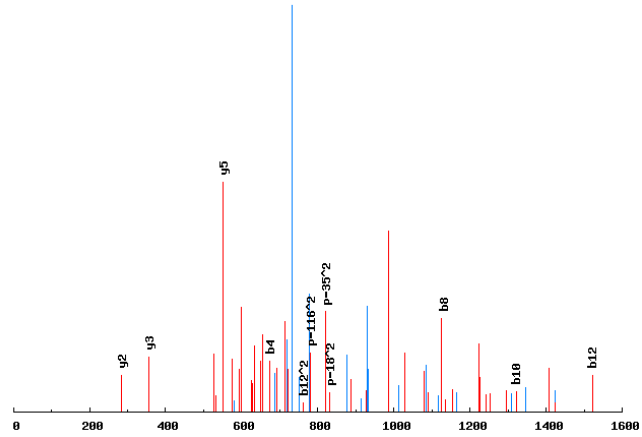

| Library | b <sup>1+</sup> | b <sup>2+</sup> | #  | AA      | #  | y <sup>1+</sup> | y <sup>2+</sup> |
|---------|-----------------|-----------------|----|---------|----|-----------------|-----------------|
|         | 244.0369        | 122.5221        | 1  | Y [243] | 13 |                 |                 |
|         | 391.1054        | 196.0563        | 2  | F       | 12 | 1433.6791       | 717.3432        |
|         | 506.1323        | 253.5698        | 3  | D       | 11 | 1286.6107       | 643.8090        |
|         | 673.1307        | 337.0690        | 4  | S [167] | 10 | 1171.5837       | 586.2955        |
|         | 772.1991        | 386.6032        | 5  | V       | 9  | 1004.5854       | 502.7963        |
|         | 938.3084        | 469.6579        | 6  | R [166] | 8  | 905.5170        | 453.2621        |
|         | 1025.3405       | 513.1739        | 7  | S       | 7  | 739.4076        | 370.2074        |
|         | 1126.3882       | 563.6977        | 8  | T       | 6  | 652.3755        | 326.6914        |
|         | 1223.4409       | 612.2241        | 9  | P       | 5  | 551.3279        | 276.1676        |
|         | 1322.5093       | 661.7583        | 10 | V       | 4  | 454.2751        | 227.6412        |
|         | 1393.5464       | 697.2769        | 11 | A       | 3  | 355.2067        | 178.1070        |
|         | 1522.5890       | 761.7982        | 12 | E       | 2  | 284.1696        | 142.5884        |
|         |                 |                 | 13 | K [136] | 1  | 155.1270        | 78.0671         |

# Annotated spectra from Saleem et. al. 2009

R.YFGVS<sub>167</sub>DDD<sub>136</sub>DAIK<sub>136</sub>E/2

0.9886

1e+04

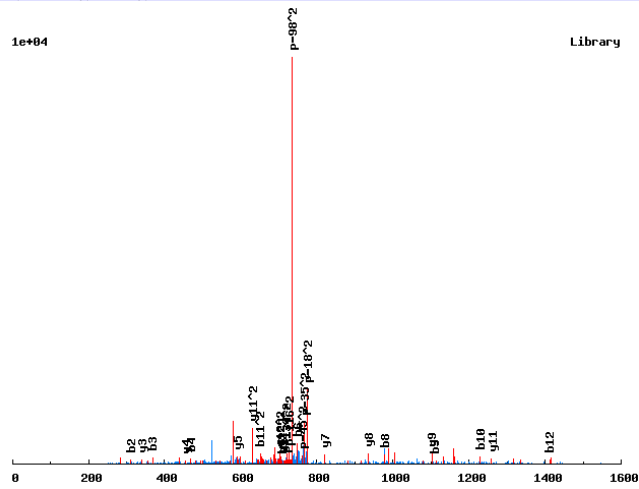

| Library | b <sup>1+</sup>  | b <sup>2+</sup> | #  | AA     | #  | y <sup>1+</sup>  | y <sup>2+</sup> |
|---------|------------------|-----------------|----|--------|----|------------------|-----------------|
|         | 164.0706         | 82.5389         | 1  | Y      | 13 |                  |                 |
|         | <b>311.1390</b>  | 156.0731        | 2  | F      | 12 | 1405.6217        | <b>703.3145</b> |
|         | <b>368.1605</b>  | 184.5839        | 3  | G      | 11 | <b>1258.5533</b> | <b>629.7803</b> |
|         | <b>467.2289</b>  | 234.1181        | 4  | V      | 10 | 1201.5319        | 601.2696        |
|         | 634.2273         | 317.6173        | 5  | S[167] | 9  | <b>1102.4634</b> | 551.7354        |
|         | <b>749.2542</b>  | 375.1307        | 6  | D      | 8  | <b>935.4651</b>  | 468.2362        |
|         | 864.2811         | 432.6442        | 7  | D      | 7  | <b>820.4381</b>  | 410.7227        |
|         | <b>979.3081</b>  | 490.1577        | 8  | D      | 6  | <b>705.4112</b>  | 353.2092        |
|         | <b>1115.4172</b> | 558.2123        | 9  | K[136] | 5  | <b>590.3843</b>  | 295.6958        |
|         | <b>1230.4442</b> | 615.7257        | 10 | D      | 4  | <b>454.2751</b>  | 227.6412        |
|         | 1301.4813        | <b>651.2443</b> | 11 | A      | 3  | <b>339.2482</b>  | 170.1277        |
|         | <b>1414.5653</b> | <b>707.7863</b> | 12 | I      | 2  | 268.2111         | 134.6092        |
|         |                  |                 | 13 | K[136] | 1  | 155.1270         | 78.0671         |

# Annotated spectra from Saleem et. al. 2009

R.Y<sub>243</sub>GGHSM<sub>147</sub>SDPGTTYR.T/3

0.9904

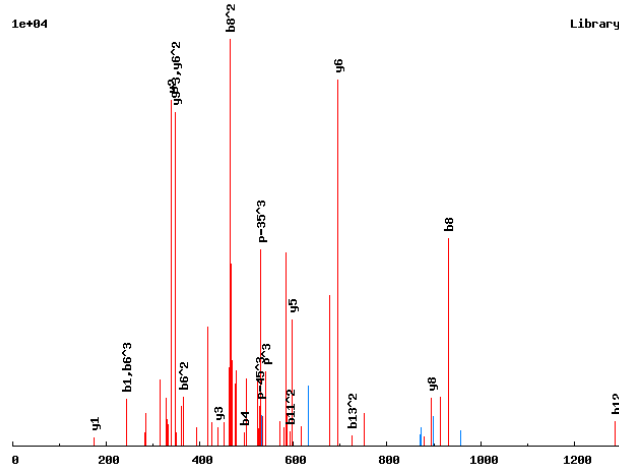

| Library | b <sup>1+</sup> | b <sup>2+</sup> | b <sup>3+</sup> | #  | AA     | #  | y <sup>1+</sup> | y <sup>2+</sup> | y <sup>3+</sup> |
|---------|-----------------|-----------------|-----------------|----|--------|----|-----------------|-----------------|-----------------|
|         | 244.0369        | 122.5221        | 82.0172         | 1  | Y[243] | 14 |                 |                 |                 |
|         | 301.0584        | 151.0328        | 101.0243        | 2  | G      | 13 | 1381.5801       | 691.2937        | 461.1982        |
|         | 358.0799        | 179.5436        | 120.0315        | 3  | G      | 12 | 1324.5586       | 662.7830        | 442.1911        |
|         | 495.1388        | 248.0730        | 165.7178        | 4  | H      | 11 | 1267.5372       | 634.2722        | 423.1839        |
|         | 582.1708        | 291.5890        | 194.7285        | 5  | S      | 10 | 1130.4783       | 565.7428        | 377.4976        |
|         | 729.2062        | 365.1067        | 243.7403        | 6  | M[147] | 9  | 1043.4462       | 522.2268        | 348.4869        |
|         | 816.2382        | 408.6228        | 272.7509        | 7  | S      | 8  | 896.4108        | 448.7091        | 299.4751        |
|         | 931.2652        | 466.1362        | 311.0932        | 8  | D      | 7  | 809.3788        | 405.1930        | 270.4645        |
|         | 1028.3179       | 514.6626        | 343.4442        | 9  | P      | 6  | 694.3519        | 347.6796        | 232.1221        |
|         | 1085.3394       | 543.1733        | 362.4513        | 10 | G      | 5  | 597.2991        | 299.1532        | 199.7712        |
|         | 1186.3871       | 593.6972        | 396.1339        | 11 | T      | 4  | 540.2776        | 270.6425        | 180.7641        |
|         | 1287.4348       | 644.2210        | 429.8164        | 12 | T      | 3  | 439.2300        | 220.1186        | 147.0815        |
|         | 1450.4981       | 725.7527        | 484.1709        | 13 | Y      | 2  | 338.1823        | 169.5948        | 113.3989        |
|         |                 |                 |                 | 14 | R      | 1  | 175.1190        | 88.0631         | 59.0445         |

# Annotated spectra from Saleem et. al. 2009

K.YGS<sub>167</sub>EKGS<sub>167</sub>PAGPSAVTARL/3

0.8923

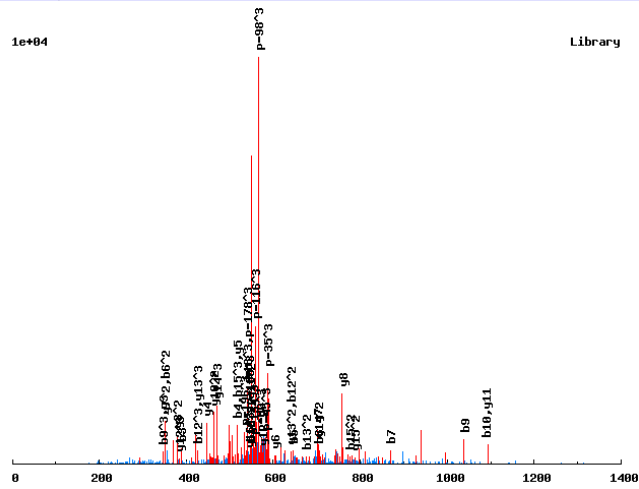

| Library | b <sup>1+</sup> | b <sup>2+</sup> | b <sup>3+</sup> | #  | AA     | #  | y <sup>1+</sup> | y <sup>2+</sup> | y <sup>3+</sup> |
|---------|-----------------|-----------------|-----------------|----|--------|----|-----------------|-----------------|-----------------|
|         | 164.0706        | 82.5389         | 55.3617         | 1  | Y      | 17 |                 |                 |                 |
|         | 221.0921        | 111.0497        | 74.3689         | 2  | G      | 16 | 1631.6826       | 816.3449        | 544.5657        |
|         | 388.0904        | 194.5489        | 130.0350        | 3  | S[167] | 15 | 1574.6611       | 787.8342        | 525.5586        |
|         | 517.1330        | 259.0702        | 173.0492        | 4  | E      | 14 | 1407.6628       | 704.3350        | 469.8924        |
|         | 645.2280        | 323.1176        | 215.7475        | 5  | K      | 13 | 1278.6202       | 639.8137        | 426.8782        |
|         | 702.2494        | 351.6284        | 234.7547        | 6  | G      | 12 | 1150.5252       | 575.7662        | 384.1799        |
|         | 869.2478        | 435.1275        | 290.4208        | 7  | S[167] | 11 | 1093.5037       | 547.2555        | 365.1728        |
|         | 966.3006        | 483.6539        | 322.7717        | 8  | P      | 10 | 926.5054        | 463.7563        | 309.5066        |
|         | 1037.3377       | 519.1725        | 346.4507        | 9  | A      | 9  | 829.4526        | 415.2300        | 277.1557        |
|         | 1094.3591       | 547.6832        | 365.4579        | 10 | G      | 8  | 758.4155        | 379.7114        | 253.4767        |
|         | 1191.4119       | 596.2096        | 397.8088        | 11 | P      | 7  | 701.3940        | 351.2007        | 234.4695        |
|         | 1278.4439       | 639.7256        | 426.8195        | 12 | S      | 6  | 604.3413        | 302.6743        | 202.1186        |
|         | 1349.4810       | 675.2442        | 450.4985        | 13 | A      | 5  | 517.3093        | 259.1583        | 173.1079        |
|         | 1448.5494       | 724.7784        | 483.5213        | 14 | V      | 4  | 446.2721        | 223.6397        | 149.4289        |
|         | 1549.5971       | 775.3022        | 517.2039        | 15 | T      | 3  | 347.2037        | 174.1055        | 116.4061        |
|         | 1620.6342       | 810.8208        | 540.8829        | 16 | A      | 2  | 246.1561        | 123.5817        | 82.7235         |
|         |                 |                 |                 | 17 | R      | 1  | 175.1190        | 88.0631         | 59.0445         |



# Annotated spectra from Saleem et. al. 2009

K.YGS<sub>167</sub>-NLLGK<sub>136</sub>.C/2

0.9093

1e+04

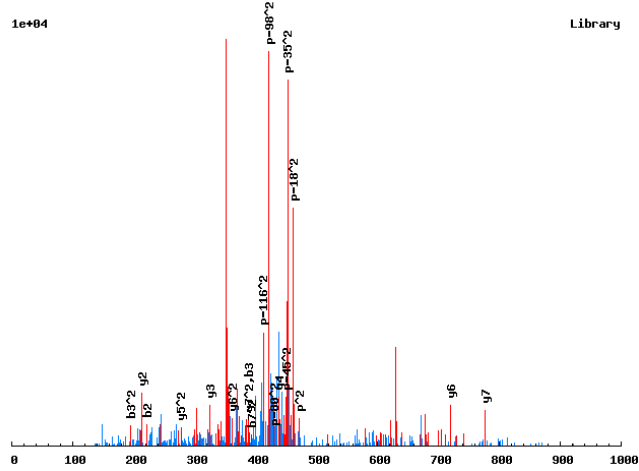

| Library | b <sup>1+</sup> | b <sup>2+</sup> | # | AA     | # | y <sup>1+</sup> | y <sup>2+</sup> |
|---------|-----------------|-----------------|---|--------|---|-----------------|-----------------|
|         | 164.0706        | 82.5389         | 1 | Y      | 8 |                 |                 |
|         | 221.0921        | 111.0497        | 2 | G      | 7 | 776.3793        | 388.6933        |
|         | 388.0904        | 194.5489        | 3 | S[167] | 6 | 719.3579        | 360.1826        |
|         | 502.1334        | 251.5703        | 4 | N      | 5 | 552.3595        | 276.6834        |
|         | 615.2174        | 308.1124        | 5 | L      | 4 | 438.3166        | 219.6619        |
|         | 728.3015        | 364.6544        | 6 | L      | 3 | 325.2325        | 163.1199        |
|         | 785.3229        | 393.1651        | 7 | G      | 2 | 212.1485        | 106.5779        |
|         |                 |                 | 8 | K[136] | 1 | 155.1270        | 78.0671         |

# Annotated spectra from Saleem et. al. 2009

K.YIGPEGEAPEAFS<sub>167</sub>MK<sub>136</sub>-/2

0.9967

1e+04

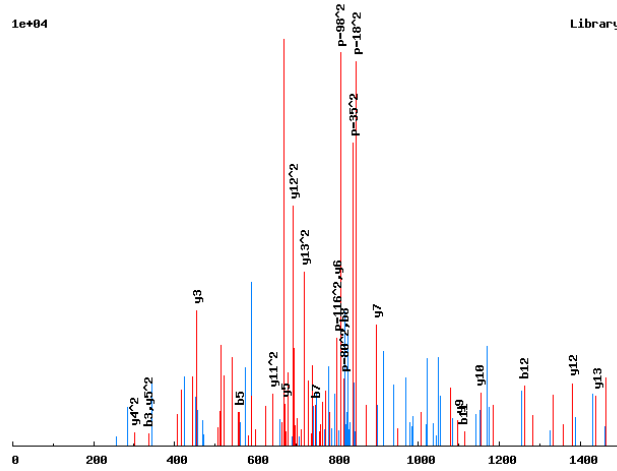

| Library | b <sup>1+</sup>  | b <sup>2+</sup> | #  | AA     | #  | y <sup>1+</sup>  | y <sup>2+</sup> |
|---------|------------------|-----------------|----|--------|----|------------------|-----------------|
|         | 164.0706         | 82.5389         | 1  | Y      | 15 |                  |                 |
|         | 277.1547         | 139.0810        | 2  | I      | 14 | 1550.6688        | 775.8380        |
|         | <b>334.1761</b>  | 167.5917        | 3  | G      | 13 | <b>1437.5847</b> | <b>719.2960</b> |
|         | 431.2289         | 216.1181        | 4  | P      | 12 | <b>1380.5632</b> | <b>690.7853</b> |
|         | <b>560.2715</b>  | 280.6394        | 5  | E      | 11 | 1283.5105        | <b>642.2589</b> |
|         | 617.2929         | 309.1501        | 6  | G      | 10 | <b>1154.4679</b> | 577.7376        |
|         | <b>746.3355</b>  | 373.6714        | 7  | E      | 9  | <b>1097.4464</b> | 549.2268        |
|         | <b>817.3726</b>  | 409.1900        | 8  | A      | 8  | 968.4038         | 484.7056        |
|         | 914.4254         | 457.7163        | 9  | P      | 7  | <b>897.3667</b>  | 449.1870        |
|         | 1043.4680        | 522.2376        | 10 | E      | 6  | <b>800.3140</b>  | 400.6606        |
|         | <b>1114.5051</b> | 557.7562        | 11 | A      | 5  | <b>671.2714</b>  | <b>336.1393</b> |
|         | <b>1261.5735</b> | 631.2904        | 12 | F      | 4  | 600.2343         | <b>300.6208</b> |
|         | 1428.5719        | 714.7896        | 13 | S[167] | 3  | <b>453.1659</b>  | 227.0866        |
|         | 1559.6124        | 780.3098        | 14 | M      | 2  | 286.1675         | 143.5874        |
|         |                  |                 | 15 | K[136] | 1  | 155.1270         | 78.0671         |

# Annotated spectra from Saleem et. al. 2009

K.YK<sub>136</sub>DES<sub>167</sub>DR<sub>166</sub>EHLESPEMER<sub>166</sub>E/4

0.5908

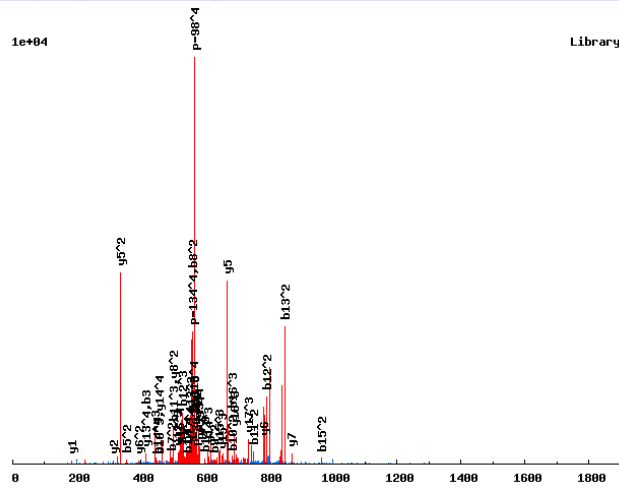

| Library | b <sup>1+</sup> | b <sup>2+</sup> | b <sup>3+</sup> | b <sup>4+</sup> | #  | AA     | #  | y <sup>1+</sup> | y <sup>2+</sup> | y <sup>3+</sup> | y <sup>4+</sup> |
|---------|-----------------|-----------------|-----------------|-----------------|----|--------|----|-----------------|-----------------|-----------------|-----------------|
|         | 164.0706        | 82.5389         | 55.3617         | 41.7731         | 1  | Y      | 18 |                 |                 |                 |                 |
|         | 300.1798        | 150.5935        | 100.7314        | 75.8004         | 2  | K[136] | 17 | 2207.9633       | 1104.4853       | 736.6593        | 552.7463        |
|         | 415.2067        | 208.1070        | 139.0738        | 104.5571        | 3  | D      | 16 | 2071.8541       | 1036.4307       | 691.2896        | 518.7190        |
|         | 544.2493        | 272.6283        | 182.0880        | 136.8178        | 4  | E      | 15 | 1956.8272       | 978.9172        | 652.9472        | 489.9622        |
|         | 711.2477        | 356.1275        | 237.7541        | 178.5674        | 5  | S[167] | 14 | 1827.7846       | 914.3959        | 609.9330        | 457.7016        |
|         | 826.2746        | 413.6409        | 276.0964        | 207.3241        | 6  | D      | 13 | 1660.7862       | 830.8967        | 554.2669        | 415.9520        |
|         | 992.3840        | 496.6956        | 331.4662        | 248.8515        | 7  | R[166] | 12 | 1545.7593       | 773.3833        | 515.9246        | 387.1953        |
|         | 1121.4266       | 561.2169        | 374.4804        | 281.1121        | 8  | E      | 11 | 1379.6499       | 690.3286        | 460.5548        | 345.6679        |
|         | 1258.4855       | 629.7464        | 420.1667        | 315.3768        | 9  | H      | 10 | 1250.6073       | 625.8073        | 417.5406        | 313.4073        |
|         | 1371.5695       | 686.2884        | 457.8614        | 343.6478        | 10 | L      | 9  | 1113.5484       | 557.2778        | 371.8543        | 279.1426        |
|         | 1500.6121       | 750.8097        | 500.8756        | 375.9085        | 11 | E      | 8  | 1000.4643       | 500.7358        | 334.1596        | 250.8715        |
|         | 1587.6442       | 794.3257        | 529.8862        | 397.6665        | 12 | S      | 7  | 871.4217        | 436.2145        | 291.1454        | 218.6109        |
|         | 1700.7282       | 850.8677        | 567.5809        | 425.9375        | 13 | L      | 6  | 784.3897        | 392.6985        | 262.1348        | 196.8529        |
|         | 1797.7810       | 899.3941        | 599.9318        | 450.2007        | 14 | P      | 5  | 671.3056        | 336.1565        | 224.4401        | 168.5819        |
|         | 1926.8236       | 963.9154        | 642.9460        | 482.4614        | 15 | E      | 4  | 574.2529        | 287.6301        | 192.0891        | 144.3187        |
|         | 2057.8641       | 1029.4357       | 686.6262        | 515.2215        | 16 | M      | 3  | 445.2103        | 223.1088        | 149.0750        | 112.0580        |
|         | 2186.9066       | 1093.9570       | 729.6404        | 547.4821        | 17 | E      | 2  | 314.1698        | 157.5885        | 105.3948        | 79.2979         |
|         |                 |                 |                 |                 | 18 | R[166] | 1  | 185.1272        | 93.0672         | 62.3806         | 47.0373         |

# Annotated spectra from Saleem et. al. 2009

K.YKEES<sub>167</sub>RS<sub>167</sub>AV-/-2

0.6242

1e+04

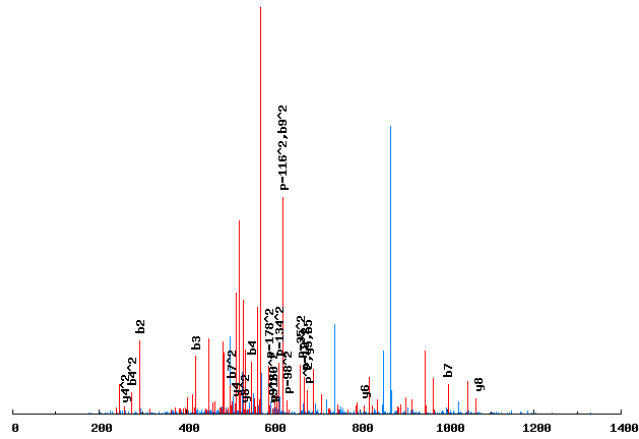

| Library | b <sup>1+</sup> | b <sup>2+</sup> | #  | AA     | #  | y <sup>1+</sup> | y <sup>2+</sup> |
|---------|-----------------|-----------------|----|--------|----|-----------------|-----------------|
|         | 164.0706        | 82.5389         | 1  | Y      | 10 |                 |                 |
|         | 292.1656        | 146.5864        | 2  | K      | 9  | 1194.4439       | 597.7256        |
|         | 421.2082        | 211.1077        | 3  | E      | 8  | 1066.3490       | 533.6781        |
|         | 550.2508        | 275.6290        | 4  | E      | 7  | 937.3064        | 469.1568        |
|         | 679.2933        | 340.1503        | 5  | E      | 6  | 808.2638        | 404.6355        |
|         | 846.2917        | 423.6495        | 6  | S[167] | 5  | 679.2212        | 340.1142        |
|         | 1002.3928       | 501.7000        | 7  | R      | 4  | 512.2228        | 256.6151        |
|         | 1169.3912       | 585.1992        | 8  | S[167] | 3  | 356.1217        | 178.5645        |
|         | 1240.4283       | 620.7178        | 9  | A      | 2  | 189.1234        | 95.0653         |
|         |                 |                 | 10 | V      | 1  | 118.0862        | 59.5468         |

# Annotated spectra from Saleem et. al. 2009

R.YLEESDVS<sub>167</sub>T<sub>181</sub>VGNTR<sub>166</sub>E/2

0.9991

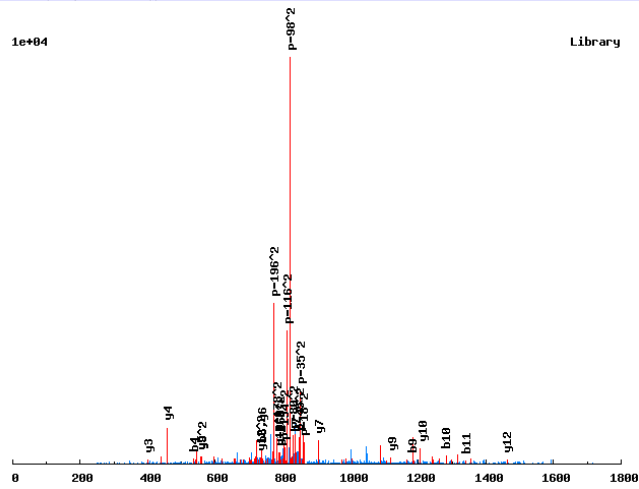

| Library | b <sup>1+</sup> | b <sup>2+</sup> | #  | AA     | #  | y <sup>1+</sup> | y <sup>2+</sup> |
|---------|-----------------|-----------------|----|--------|----|-----------------|-----------------|
|         | 164.0706        | 82.5389         | 1  | Y      | 14 |                 |                 |
|         | 277.1547        | 139.0810        | 2  | L      | 13 | 1576.6167       | 788.8120        |
|         | 406.1973        | 203.6023        | 3  | E      | 12 | 1463.5326       | 732.2700        |
|         | 535.2399        | 268.1236        | 4  | E      | 11 | 1334.4900       | 667.7487        |
|         | 622.2719        | 311.6396        | 5  | S      | 10 | 1205.4475       | 603.2274        |
|         | 737.2988        | 369.1531        | 6  | D      | 9  | 1118.4154       | 559.7114        |
|         | 836.3672        | 418.6873        | 7  | V      | 8  | 1003.3885       | 502.1979        |
|         | 1003.3656       | 502.1864        | 8  | S[167] | 7  | 904.3201        | 452.6637        |
|         | 1184.3796       | 592.6934        | 9  | T[181] | 6  | 737.3217        | 369.1645        |
|         | 1283.4480       | 642.2276        | 10 | V      | 5  | 556.3077        | 278.6575        |
|         | 1340.4695       | 670.7384        | 11 | G      | 4  | 457.2393        | 229.1233        |
|         | 1454.5124       | 727.7598        | 12 | N      | 3  | 400.2178        | 200.6126        |
|         | 1555.5601       | 778.2837        | 13 | T      | 2  | 286.1749        | 143.5911        |
|         |                 |                 | 14 | R[166] | 1  | 185.1272        | 93.0672         |

# Annotated spectra from Saleem et. al. 2009

K.YPAPGT<sub>181</sub>SPSHNEGNS<sub>167</sub>KK.A/3

0.9783

1e+04

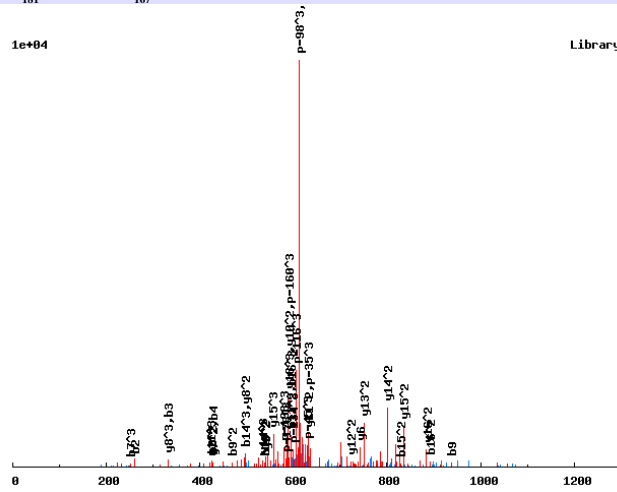

| Library | b <sup>1+</sup> | b <sup>2+</sup> | b <sup>3+</sup> | #  | AA      | #  | y <sup>1+</sup> | y <sup>2+</sup> | y <sup>3+</sup> |
|---------|-----------------|-----------------|-----------------|----|---------|----|-----------------|-----------------|-----------------|
|         | 164.0706        | 82.5389         | 55.3617         | 1  | Y       | 17 |                 |                 |                 |
|         | <b>261.1234</b> | 131.0653        | 87.7126         | 2  | P       | 16 | 1767.7099       | <b>884.3586</b> | <b>589.9081</b> |
|         | <b>332.1605</b> | 166.5839        | 111.3917        | 3  | A       | 15 | 1670.6571       | <b>835.8322</b> | <b>557.5572</b> |
|         | <b>429.2132</b> | 215.1103        | 143.7426        | 4  | P       | 14 | 1599.6200       | <b>800.3136</b> | <b>533.8782</b> |
|         | 486.2347        | 243.6210        | 162.7498        | 5  | G       | 13 | 1502.5672       | <b>751.7873</b> | 501.5273        |
|         | 667.2487        | 334.1280        | 223.0878        | 6  | T [181] | 12 | 1445.5458       | <b>723.2765</b> | 482.5201        |
|         | 754.2807        | 377.6440        | <b>252.0984</b> | 7  | S       | 11 | 1264.5318       | <b>632.7695</b> | <b>422.1821</b> |
|         | 851.3335        | <b>426.1704</b> | 284.4494        | 8  | P       | 10 | 1177.4997       | <b>589.2535</b> | 393.1714        |
|         | <b>938.3655</b> | <b>469.6864</b> | 313.4600        | 9  | S       | 9  | 1080.4470       | <b>540.7271</b> | 360.8205        |
|         | 1075.4244       | <b>538.2159</b> | 359.1463        | 10 | H       | 8  | 993.4149        | <b>497.2111</b> | <b>331.8098</b> |
|         | 1189.4674       | <b>595.2373</b> | 397.1606        | 11 | N       | 7  | 856.3560        | <b>428.6817</b> | 286.1235        |
|         | 1318.5100       | 659.7586        | 440.1748        | 12 | E       | 6  | <b>742.3131</b> | 371.6602        | 248.1092        |
|         | 1375.5314       | 688.2694        | 459.1820        | 13 | G       | 5  | <b>613.2705</b> | 307.1389        | 205.0950        |
|         | 1489.5744       | 745.2908        | <b>497.1963</b> | 14 | N       | 4  | 556.2491        | 278.6282        | 186.0879        |
|         | 1656.5727       | <b>828.7900</b> | 552.8624        | 15 | S [167] | 3  | 442.2061        | 221.6067        | 148.0736        |
|         | 1784.6677       | <b>892.8375</b> | <b>595.5607</b> | 16 | K       | 2  | 275.2078        | 138.1075        | 92.4074         |
|         |                 |                 |                 | 17 | K       | 1  | 147.1128        | 74.0600         | 49.7091         |



# Annotated spectra from Saleem et. al. 2009

R.YQLQPDDS<sub>167</sub>HYDEER<sub>166</sub>E/2

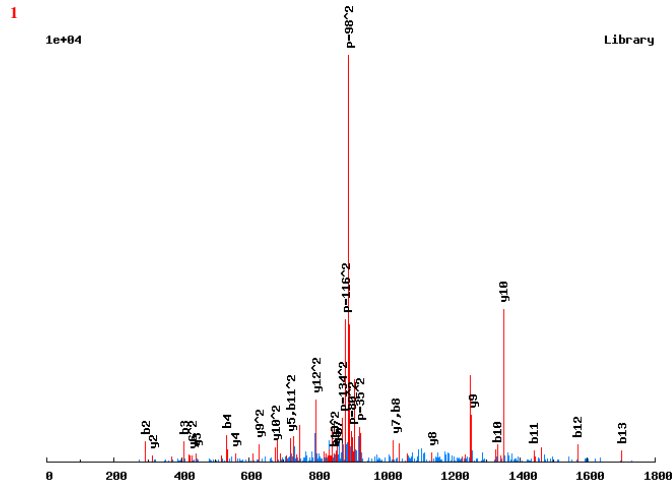

| b <sup>1+</sup> | b <sup>2+</sup> | #  | AA     | #  | y <sup>1+</sup> | y <sup>2+</sup> |
|-----------------|-----------------|----|--------|----|-----------------|-----------------|
| 164.0706        | 82.5389         | 1  | Y      | 14 |                 |                 |
| 292.1292        | 146.5682        | 2  | Q      | 13 | 1721.6678       | 861.3375        |
| 405.2132        | 203.1103        | 3  | L      | 12 | 1593.6092       | 797.3082        |
| 533.2718        | 267.1396        | 4  | Q      | 11 | 1480.5252       | 740.7662        |
| 630.3246        | 315.6659        | 5  | P      | 10 | 1352.4666       | 676.7369        |
| 745.3515        | 373.1794        | 6  | D      | 9  | 1255.4138       | 628.2106        |
| 860.3785        | 430.6929        | 7  | D      | 8  | 1140.3869       | 570.6971        |
| 1027.3768       | 514.1921        | 8  | S[167] | 7  | 1025.3599       | 513.1836        |
| 1164.4357       | 582.7215        | 9  | H      | 6  | 858.3616        | 429.6844        |
| 1327.4991       | 664.2532        | 10 | Y      | 5  | 721.3027        | 361.1550        |
| 1442.5260       | 721.7666        | 11 | D      | 4  | 558.2393        | 279.6233        |
| 1571.5686       | 786.2879        | 12 | E      | 3  | 443.2124        | 222.1098        |
| 1700.6112       | 850.8092        | 13 | E      | 2  | 314.1698        | 157.5885        |
|                 |                 | 14 | R[166] | 1  | 185.1272        | 93.0672         |

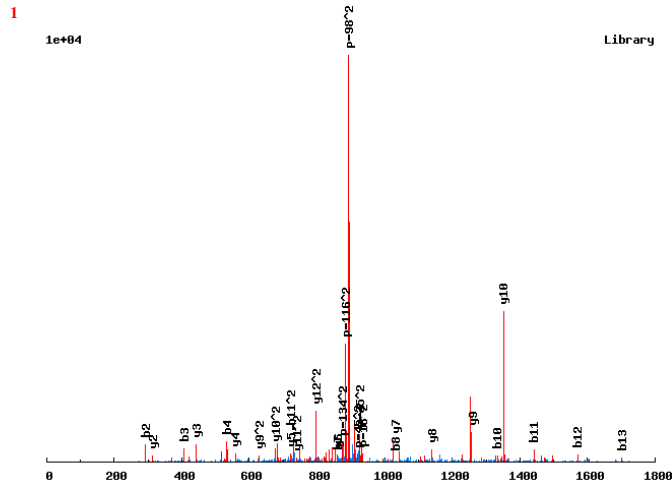

| b <sup>1+</sup> | b <sup>2+</sup> | #  | AA     | #  | y <sup>1+</sup> | y <sup>2+</sup> |
|-----------------|-----------------|----|--------|----|-----------------|-----------------|
| 164.0706        | 82.5389         | 1  | Y      | 14 |                 |                 |
| 292.1292        | 146.5682        | 2  | Q      | 13 | 1721.6678       | 861.3375        |
| 405.2132        | 203.1103        | 3  | L      | 12 | 1593.6092       | 797.3082        |
| 533.2718        | 267.1396        | 4  | Q      | 11 | 1480.5252       | 740.7662        |
| 630.3246        | 315.6659        | 5  | P      | 10 | 1352.4666       | 676.7369        |
| 745.3515        | 373.1794        | 6  | D      | 9  | 1255.4138       | 628.2106        |
| 860.3785        | 430.6929        | 7  | D      | 8  | 1140.3869       | 570.6971        |
| 1027.3768       | 514.1921        | 8  | S[167] | 7  | 1025.3599       | 513.1836        |
| 1164.4357       | 582.7215        | 9  | H      | 6  | 858.3616        | 429.6844        |
| 1327.4991       | 664.2532        | 10 | Y      | 5  | 721.3027        | 361.1550        |
| 1442.5260       | 721.7666        | 11 | D      | 4  | 558.2393        | 279.6233        |
| 1571.5686       | 786.2879        | 12 | E      | 3  | 443.2124        | 222.1098        |
| 1700.6112       | 850.8092        | 13 | E      | 2  | 314.1698        | 157.5885        |
|                 |                 | 14 | R[166] | 1  | 185.1272        | 93.0672         |



Annotated spectra from Saleem et. al. 2009

R.YSNIPSSKPAGEALS<sub>167</sub>PVRS<sub>167</sub>HNS<sub>167</sub>GEYR.R/3

0.8377

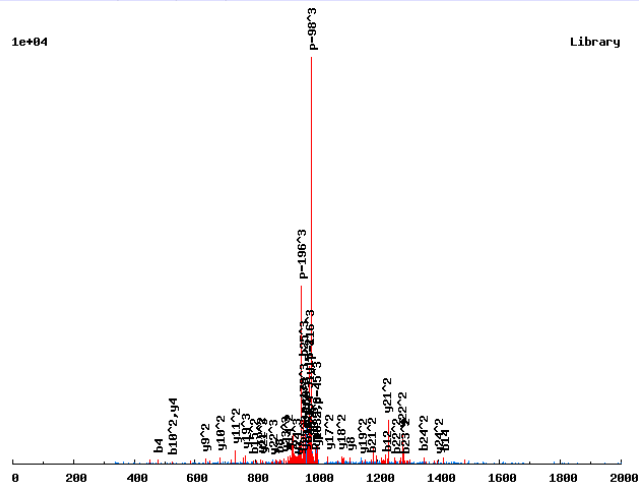

| Library | b <sup>1+</sup> | b <sup>2+</sup> | b <sup>3+</sup> | #  | AA     | #  | y <sup>1+</sup> | y <sup>2+</sup> | y <sup>3+</sup> |
|---------|-----------------|-----------------|-----------------|----|--------|----|-----------------|-----------------|-----------------|
|         | 164.0706        | 82.5389         | 55.3617         | 1  | Y      | 26 |                 |                 |                 |
|         | 251.1026        | 126.0550        | 84.3724         | 2  | S      | 25 | 2880.2114       | 1440.6094       | 960.7420        |
|         | 365.1456        | 183.0764        | 122.3867        | 3  | N      | 24 | 2793.1794       | 1397.0933       | 931.7313        |
|         | 478.2296        | 239.6185        | 160.0814        | 4  | I      | 23 | 2679.1365       | 1340.0719       | 893.7170        |
|         | 575.2824        | 288.1448        | 192.4323        | 5  | P      | 22 | 2566.0524       | 1283.5298       | 856.0223        |
|         | 662.3144        | 331.6609        | 221.4430        | 6  | S      | 21 | 2468.9996       | 1235.0035       | 823.6714        |
|         | 749.3465        | 375.1769        | 250.4537        | 7  | S      | 20 | 2381.9676       | 1191.4874       | 794.6607        |
|         | 877.4414        | 439.2243        | 293.1520        | 8  | K      | 19 | 2294.9356       | 1147.9714       | 765.6500        |
|         | 974.4942        | 487.7507        | 325.5029        | 9  | P      | 18 | 2166.8406       | 1083.9240       | 722.9517        |
|         | 1045.5313       | 523.2693        | 349.1819        | 10 | A      | 17 | 2069.7879       | 1035.3976       | 690.6008        |
|         | 1102.5527       | 551.7800        | 368.1891        | 11 | G      | 16 | 1998.7508       | 999.8790        | 666.9218        |
|         | 1231.5953       | 616.3013        | 411.2033        | 12 | E      | 15 | 1941.7293       | 971.3683        | 647.9146        |
|         | 1302.6324       | 651.8199        | 434.8823        | 13 | A      | 14 | 1812.6867       | 906.8470        | 604.9004        |
|         | 1415.7165       | 708.3619        | 472.5770        | 14 | L      | 13 | 1741.6496       | 871.3284        | 581.2214        |
|         | 1582.7149       | 791.8611        | 528.2431        | 15 | S[167] | 12 | 1628.5655       | 814.7864        | 543.5267        |
|         | 1679.7676       | 840.3875        | 560.5941        | 16 | P      | 11 | 1461.5672       | 731.2872        | 487.8606        |
|         | 1778.8360       | 889.9217        | 593.6169        | 17 | V      | 10 | 1364.5144       | 682.7608        | 455.5097        |
|         | 1934.9371       | 967.9722        | 645.6506        | 18 | R      | 9  | 1265.4460       | 633.2266        | 422.4869        |
|         | 2101.9355       | 1051.4714       | 701.3167        | 19 | S[167] | 8  | 1109.3449       | 555.1761        | 370.4532        |
|         | 2238.9944       | 1120.0008       | 747.0030        | 20 | H      | 7  | 942.3465        | 471.6769        | 314.7870        |
|         | 2353.0373       | 1177.0223       | 785.0173        | 21 | N      | 6  | 805.2876        | 403.1475        | 269.1007        |
|         | 2520.0357       | 1260.5215       | 840.6834        | 22 | S[167] | 5  | 691.2447        | 346.1260        | 231.0864        |
|         | 2577.0572       | 1289.0322       | 859.6906        | 23 | G      | 4  | 524.2463        | 262.6268        | 175.4203        |
|         | 2706.0998       | 1353.5535       | 902.7048        | 24 | E      | 3  | 467.2249        | 234.1161        | 156.4131        |
|         | 2869.1631       | 1435.0852       | 957.0592        | 25 | Y      | 2  | 338.1823        | 169.5948        | 113.3989        |
|         |                 |                 |                 | 26 | R      | 1  | 175.1190        | 88.0631         | 59.0445         |

# Annotated spectra from Saleem et. al. 2009

R.YTIGGS<sub>167</sub>NS<sub>167</sub>IVGAK.S/2

0.9901

1e+04

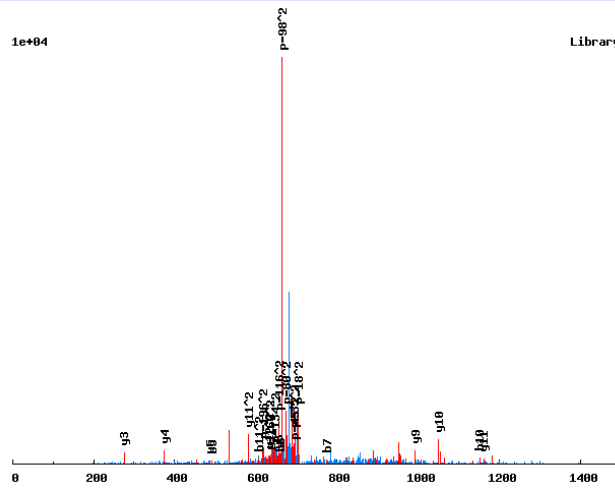

| Library | b <sup>1+</sup> | b <sup>2+</sup> | #  | AA     | #  | y <sup>1+</sup> | y <sup>2+</sup> |
|---------|-----------------|-----------------|----|--------|----|-----------------|-----------------|
|         | 164.0706        | 82.5389         | 1  | Y      | 13 |                 |                 |
|         | 265.1183        | 133.0628        | 2  | T      | 12 | 1263.5382       | 632.2727        |
|         | 378.2023        | 189.6048        | 3  | I      | 11 | 1162.4905       | 581.7489        |
|         | 435.2238        | 218.1155        | 4  | G      | 10 | 1049.4064       | 525.2068        |
|         | 492.2453        | 246.6263        | 5  | G      | 9  | 992.3850        | 496.6961        |
|         | 659.2436        | 330.1255        | 6  | S[167] | 8  | 935.3635        | 468.1854        |
|         | 773.2866        | 387.1469        | 7  | N      | 7  | 768.3651        | 384.6862        |
|         | 940.2849        | 470.6461        | 8  | S[167] | 6  | 654.3222        | 327.6647        |
|         | 1053.3690       | 527.1881        | 9  | I      | 5  | 487.3238        | 244.1656        |
|         | 1152.4374       | 576.7223        | 10 | V      | 4  | 374.2398        | 187.6235        |
|         | 1209.4589       | 605.2331        | 11 | G      | 3  | 275.1714        | 138.0893        |
|         | 1280.4960       | 640.7516        | 12 | A      | 2  | 218.1499        | 109.5786        |
|         |                 |                 | 13 | K      | 1  | 147.1128        | 74.0600         |

# Annotated spectra from Saleem et. al. 2009

R.YTSVSL<sub>167</sub>GT<sub>181</sub>SLSSPR<sub>166</sub>-R/2

0.9897

1e+04

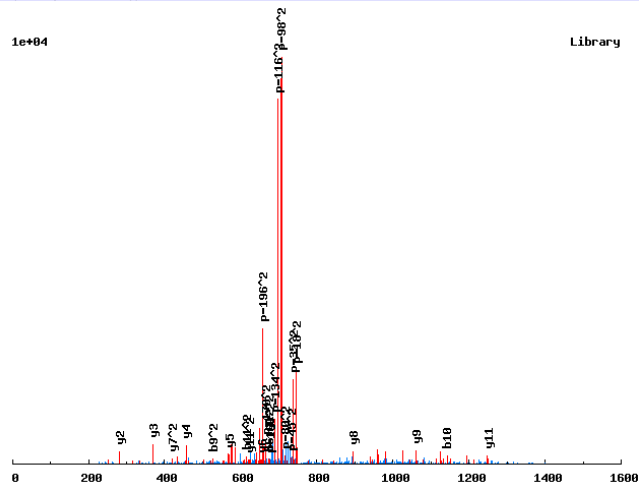

| Library | b <sup>1+</sup> | b <sup>2+</sup> | #  | AA     | #  | y <sup>1+</sup> | y <sup>2+</sup> |
|---------|-----------------|-----------------|----|--------|----|-----------------|-----------------|
|         | 164.0706        | 82.5389         | 1  | Y      | 13 |                 |                 |
|         | 265.1183        | 133.0628        | 2  | T      | 12 | 1348.5421       | 674.7747        |
|         | 352.1503        | 176.5788        | 3  | S      | 11 | 1247.4944       | 624.2508        |
|         | 451.2187        | 226.1130        | 4  | V      | 10 | 1160.4624       | 580.7348        |
|         | 618.2171        | 309.6122        | 5  | S[167] | 9  | 1061.3940       | 531.2006        |
|         | 675.2386        | 338.1229        | 6  | G      | 8  | 894.3956        | 447.7014        |
|         | 856.2526        | 428.6299        | 7  | T[181] | 7  | 837.3741        | 419.1907        |
|         | 943.2846        | 472.1459        | 8  | S      | 6  | 656.3601        | 328.6837        |
|         | 1056.3687       | 528.6880        | 9  | L      | 5  | 569.3281        | 285.1677        |
|         | 1143.4007       | 572.2040        | 10 | S      | 4  | 456.2440        | 228.6257        |
|         | 1230.4327       | 615.7200        | 11 | S      | 3  | 369.2120        | 185.1096        |
|         | 1327.4855       | 664.2464        | 12 | P      | 2  | 282.1800        | 141.5936        |
|         |                 |                 | 13 | R[166] | 1  | 185.1272        | 93.0672         |

# Annotated spectra from Saleem et. al. 2009

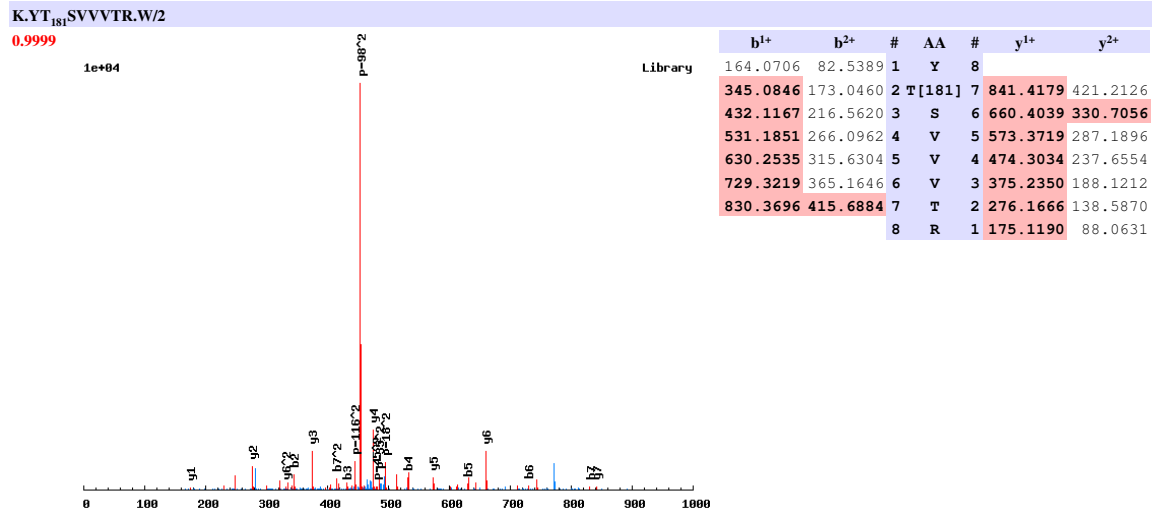

# Annotated spectra from Saleem et. al. 2009

R.Y<sub>243</sub>VT<sub>181</sub>GR<sub>166</sub>PR<sub>166</sub>V/2

0.7823

1e+04

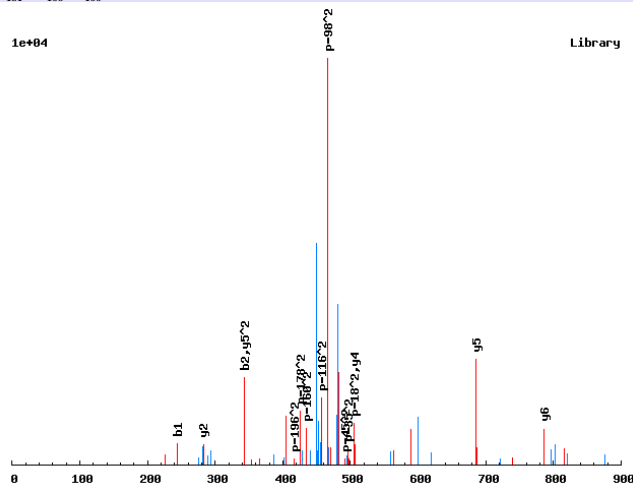

| Library | b <sup>1+</sup> | b <sup>2+</sup> | # | AA     | # | y <sup>1+</sup> | y <sup>2+</sup> |
|---------|-----------------|-----------------|---|--------|---|-----------------|-----------------|
|         | 244.0369        | 122.5221        | 1 | Y[243] | 7 |                 |                 |
|         | 343.1054        | 172.0563        | 2 | V      | 6 | 785.3932        | 393.2003        |
|         | 524.1194        | 262.5633        | 3 | T[181] | 5 | 686.3248        | 343.6661        |
|         | 581.1408        | 291.0741        | 4 | G      | 4 | 505.3108        | 253.1590        |
|         | 747.2502        | 374.1287        | 5 | R[166] | 3 | 448.2894        | 224.6483        |
|         | 844.3030        | 422.6551        | 6 | P      | 2 | 282.1800        | 141.5936        |
|         |                 |                 | 7 | R[166] | 1 | 185.1272        | 93.0672         |
