# Supplementary material
Source: PubMed Central journal article supplement (PMC2938103)

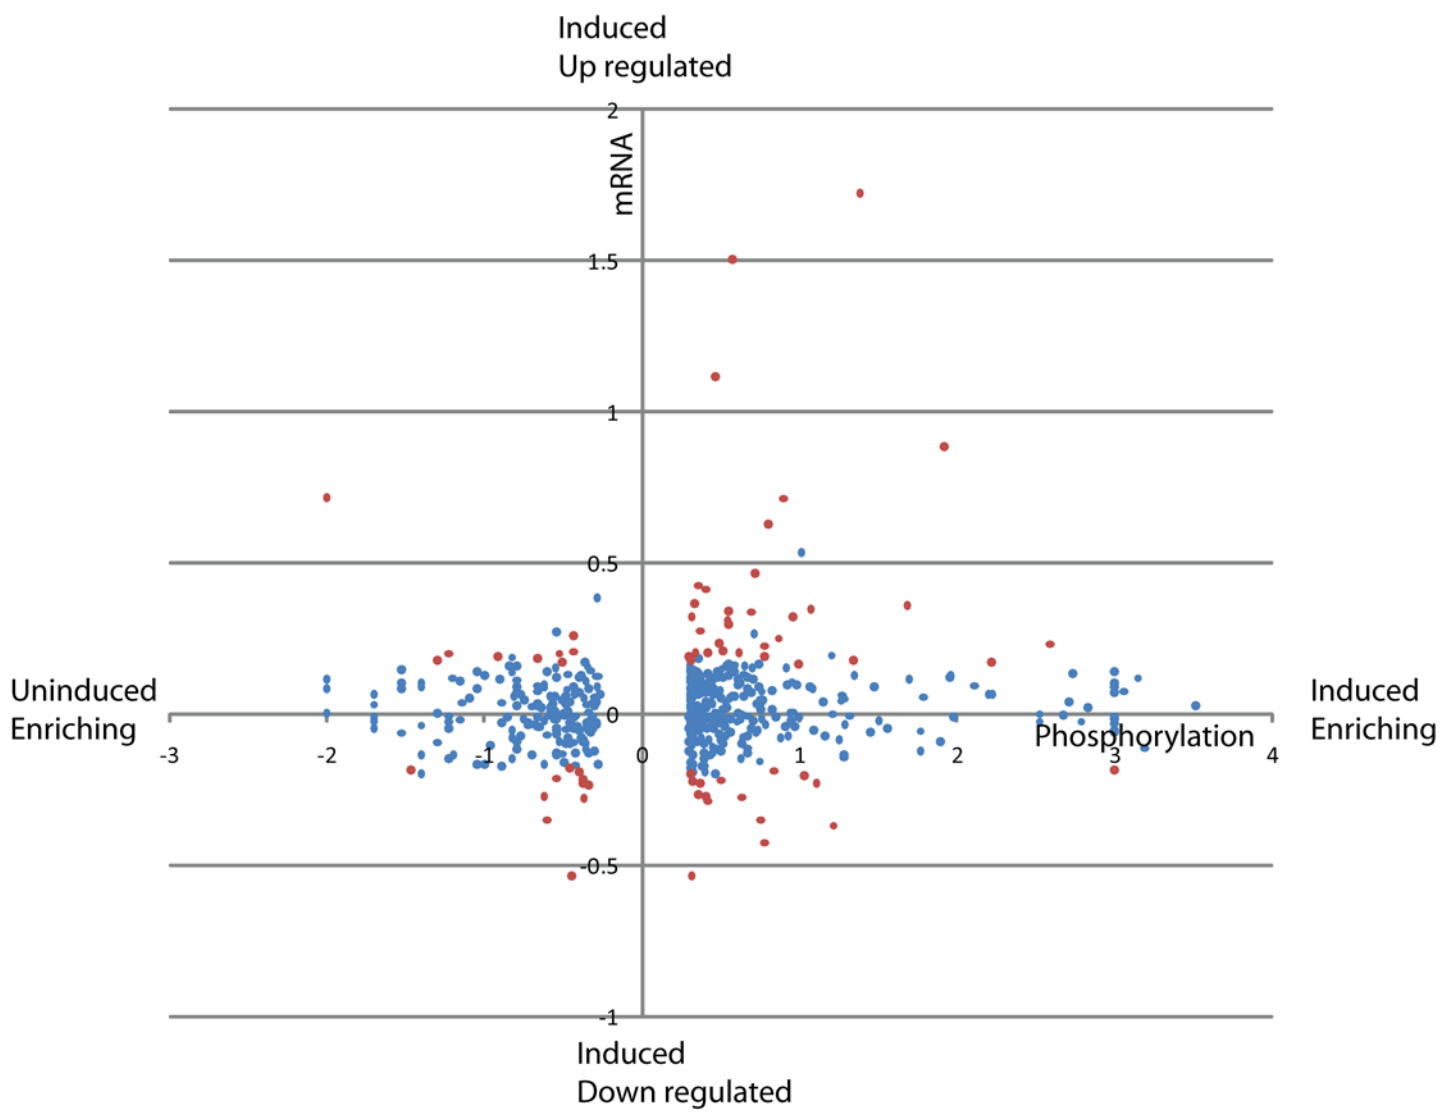

Supplement: supp_M000116-MCP201_FigureS3.pdf [file supp_M000116-MCP201_FigureS3.pdf]
